# Supplementary material for: Gene expression profile of HCT-8 cells following single or co-infections with Cryptosporidium parvum and bovine coronavirus
Source: Research Square preprint supplement (doi:10.21203/rs.3.rs-2673942/v1), 2023-03-23
Supplement: Supplementary file 1 [file 08585f75243ddbba00cb7f84.xlsx]

## Sheet: BCoV vs coinfection 24 hpi
Supplementary table S2: Differentially expressed genes (DEGs) mapped to Homo sapiens when single infections (BCoV or C. parvum) are compared with co-infected cells at 24 and 72 hpi. Positive fold-change values indicate gene upregulation in co-infected HCT-8 cells.
gene	gene_id	sample_1	sample_2	status	value_1	value_2	log2_FC	Fold Change (FC)	test_stat	p_value	q_value	significant
RP11-211C9.1	ENSG00000254367	vir24	vir_par24	OK	0.793467	1.53138	0.94859	1.92999	0.999692	0.01385	0.0451488	yes
MAFF	ENSG00000185022	vir24	vir_par24	OK	6.98867	13.3639	0.935251	1.91222	1.86934	5e-05	0.000280515	yes
NR4A3	ENSG00000119508	vir24	vir_par24	OK	0.637391	1.14435	0.844282	1.79537	1.51921	0.00045	0.00215616	yes
DUSP5	ENSG00000138166	vir24	vir_par24	OK	4.06975	6.79692	0.73994	1.67011	1.8419	5e-05	0.000280515	yes
FOSL1	ENSG00000175592	vir24	vir_par24	OK	2.91244	4.36293	0.583071	1.49803	1.12203	0.00505	0.0188233	yes
ZFP36	ENSG00000128016	vir24	vir_par24	OK	23.293	14.445	-0.689332	-1.61254	-1.80716	5e-05	0.000280515	yes
CTD-2203K17.1	ENSG00000249572	vir24	vir_par24	OK	4.32927	2.38842	-0.858072	-1.81261	-1.20164	0.00405	0.015493	yes
AHDC1	ENSG00000126705	vir24	vir_par24	OK	2.33988	1.26659	-0.885477	-1.84738	-1.02146	0.0004	0.00193713	yes
EGR1	ENSG00000120738	vir24	vir_par24	OK	328.926	164.152	-1.00273	-2.00379	-3.30944	5e-05	0.000280515	yes
HIST1H2AG	ENSG00000196787	vir24	vir_par24	OK	1.83955	0.849797	-1.11416	-2.16469	-1.77065	5e-05	0.000280515	yes
DUSP2	ENSG00000158050	vir24	vir_par24	OK	2.75594	1.25007	-1.14053	-2.20462	-1.7544	0.0001	0.000538822	yes
RPSA	ENSG00000168028	vir24	vir_par24	OK	234.526	99.922	-1.23088	-2.3471	-3.85899	5e-05	0.000280515	yes
HIST1H2BN	ENSG00000233822	vir24	vir_par24	OK	4.32963	1.6681	-1.37604	-2.59555	-1.69697	5e-05	0.000280515	yes
FOS	ENSG00000170345	vir24	vir_par24	OK	35.8019	11.8698	-1.59274	-3.01622	-3.90019	5e-05	0.000280515	yes

## Sheet: C parvum vs coinfection 24 hpi
Supplementary table S2: Differentially expressed genes (DEGs) mapped to Homo sapiens when single infections (BCoV or C. parvum) are compared with co-infected cells at 24 and 72 hpi. Positive fold-change values indicate gene upregulation in co-infected HCT-8 cells.
gene	gene_id	sample_1	sample_2	status	value_1	value_2	log2_FC	Fold Change (FC)	test_stat	p_value	q_value	significant
ANKRD1	ENSG00000148677	par24	vir_par24	OK	0.398418	16.7535	5.39404	42.0502	9.36203	5e-05	0.000280515	yes
IL1A	ENSG00000115008	par24	vir_par24	OK	0.276071	3.93909	3.83475	14.2684	5.2822	5e-05	0.000280515	yes
IL8	ENSG00000169429	par24	vir_par24	OK	1.49219	13.1869	3.1436	8.83727	4.71873	5e-05	0.000280515	yes
ATF3	ENSG00000162772	par24	vir_par24	OK	2.71454	23.6553	3.12338	8.71427	6.92391	5e-05	0.000280515	yes
CXCL2	ENSG00000081041	par24	vir_par24	OK	0.564193	4.09347	2.85906	7.25542	3.52309	5e-05	0.000280515	yes
RP11-43D4.2	ENSG00000258111	par24	vir_par24	OK	2.62713	18.2698	2.79791	6.95432	3.74909	5e-05	0.000280515	yes
RP11-383J24.1	ENSG00000253227	par24	vir_par24	OK	0.276816	1.47179	2.41057	5.31684	1.56774	0.00305	0.0120459	yes
DTNA	ENSG00000134769	par24	vir_par24	OK	0.304304	1.57853	2.37499	5.18732	0.992562	5e-05	0.000280515	yes
CRYAB	ENSG00000109846	par24	vir_par24	OK	0.230001	1.05685	2.20006	4.59498	0.65005	5e-05	0.000280515	yes
DNAJB9	ENSG00000128590	par24	vir_par24	OK	7.6088	34.4554	2.17899	4.52836	3.43558	5e-05	0.000280515	yes
RNU6ATAC	ENSG00000221676	par24	vir_par24	OK	89.1633	368.377	2.04666	4.13148	2.04529	0.0001	0.000538822	yes
FICD	ENSG00000198855	par24	vir_par24	OK	1.63447	6.42565	1.97502	3.93134	1.83944	5e-05	0.000280515	yes
NR4A3	ENSG00000119508	par24	vir_par24	OK	0.310834	1.14435	1.88032	3.68157	3.06702	5e-05	0.000280515	yes
DDIT3	ENSG00000175197	par24	vir_par24	OK	24.1034	87.3148	1.85699	3.62251	2.1402	5e-05	0.000280515	yes
ATP5G1P4	ENSG00000227440	par24	vir_par24	OK	0.93227	3.34044	1.84122	3.58313	1.77847	0.0003	0.00148912	yes
FBXO16	ENSG00000214050	par24	vir_par24	OK	7.85092	26.5561	1.75811	3.38255	1.46439	5e-05	0.000280515	yes
LURAP1L	ENSG00000153714	par24	vir_par24	OK	10.6003	32.5044	1.61654	3.06639	4.47035	5e-05	0.000280515	yes
DUSP1	ENSG00000120129	par24	vir_par24	OK	2.0254	6.15019	1.60243	3.03654	3.25729	5e-05	0.000280515	yes
CREB5	ENSG00000146592	par24	vir_par24	OK	1.01728	2.95335	1.53764	2.90319	0.945109	0.00015	0.000786087	yes
MIR22HG	ENSG00000186594	par24	vir_par24	OK	2.42632	7.0155	1.53178	2.89142	1.22357	5e-05	0.000280515	yes
RGS16	ENSG00000143333	par24	vir_par24	OK	1.84071	5.14419	1.48268	2.79467	3.1648	5e-05	0.000280515	yes
DDIT4	ENSG00000168209	par24	vir_par24	OK	48.3987	135.137	1.48138	2.79216	5.00414	5e-05	0.000280515	yes
MATN1-AS1	ENSG00000186056	par24	vir_par24	OK	0.410472	1.01712	1.30913	2.47792	1.13834	0.00465	0.0174982	yes
KLF6	ENSG00000067082	par24	vir_par24	OK	26.4237	65.4042	1.30755	2.47521	3.77441	5e-05	0.000280515	yes
ZNF165	ENSG00000197279	par24	vir_par24	OK	4.37844	10.74	1.2945	2.45292	3.16191	5e-05	0.000280515	yes
SLC25A25	ENSG00000148339	par24	vir_par24	OK	4.93478	12.0902	1.29277	2.44998	2.989	5e-05	0.000280515	yes
CYR61	ENSG00000142871	par24	vir_par24	OK	6.73462	16.082	1.25578	2.38796	3.35136	5e-05	0.000280515	yes
FKBP14	ENSG00000106080	par24	vir_par24	OK	12.3551	28.7266	1.21729	2.3251	1.01569	0.0038	0.0146441	yes
INSIG1	ENSG00000186480	par24	vir_par24	OK	189.762	440.891	1.21623	2.32339	3.81325	5e-05	0.000280515	yes
DNAJC25,DNAJC25-GNG10	ENSG00000059769,ENSG00000244115	par24	vir_par24	OK	2.85413	6.59627	1.2086	2.31113	2.13476	5e-05	0.000280515	yes
EIF2AK3	ENSG00000172071	par24	vir_par24	OK	9.33467	21.5664	1.20811	2.31035	2.44475	5e-05	0.000280515	yes
CXCL3	ENSG00000163734	par24	vir_par24	OK	2.33323	5.37692	1.20445	2.30449	2.11667	5e-05	0.000280515	yes
SIK1	ENSG00000142178	par24	vir_par24	OK	4.48675	10.096	1.17004	2.25018	2.86107	5e-05	0.000280515	yes
RAB30	ENSG00000137502	par24	vir_par24	OK	3.6836	8.287	1.16973	2.2497	0.613286	0.0117	0.0390912	yes
EREG	ENSG00000124882	par24	vir_par24	OK	19.7169	43.6467	1.14644	2.21367	3.47264	5e-05	0.000280515	yes
IL10RA	ENSG00000110324	par24	vir_par24	OK	0.652698	1.42143	1.12286	2.17778	0.928433	0.0003	0.00148912	yes
ERRFI1	ENSG00000116285	par24	vir_par24	OK	69.2873	150.528	1.11937	2.17252	3.78868	5e-05	0.000280515	yes
FAM46A	ENSG00000112773	par24	vir_par24	OK	7.03752	15.2208	1.1129	2.1628	2.42128	5e-05	0.000280515	yes
HERPUD1	ENSG00000051108	par24	vir_par24	OK	98.994	212.924	1.10492	2.15087	2.83302	5e-05	0.000280515	yes
JUN	ENSG00000177606	par24	vir_par24	OK	3.97918	8.43624	1.08413	2.1201	2.84948	5e-05	0.000280515	yes
CSRNP1	ENSG00000144655	par24	vir_par24	OK	3.79194	8.01387	1.07956	2.11339	2.61514	5e-05	0.000280515	yes
CLIP4	ENSG00000115295	par24	vir_par24	OK	2.1154	4.46321	1.07715	2.10986	1.00106	0.00275	0.0109946	yes
EDN1	ENSG00000078401	par24	vir_par24	OK	0.734381	1.52246	1.0518	2.07311	1.74443	5e-05	0.000280515	yes
SEC24D	ENSG00000150961	par24	vir_par24	OK	10.3215	21.2931	1.04474	2.06299	2.52996	5e-05	0.000280515	yes
CTGF	ENSG00000118523	par24	vir_par24	OK	6.96551	14.2177	1.02939	2.04116	2.72052	5e-05	0.000280515	yes
SEC31A	ENSG00000138674	par24	vir_par24	OK	17.7684	36.0271	1.01977	2.0276	1.05497	0.0048	0.0179945	yes
CDKN2AIP	ENSG00000168564	par24	vir_par24	OK	10.6935	21.6341	1.01658	2.02312	2.81738	5e-05	0.000280515	yes
RP11-84C13.1	ENSG00000271359	par24	vir_par24	OK	1.60323	3.22326	1.00754	2.01048	1.48466	0.00085	0.0038374	yes
BHLHE40	ENSG00000134107	par24	vir_par24	OK	6.99048	13.551	0.954938	1.9385	2.64013	5e-05	0.000280515	yes
GADD45A	ENSG00000116717	par24	vir_par24	OK	5.59575	10.6955	0.934601	1.91136	2.23747	5e-05	0.000280515	yes
RP11-61N20.3	ENSG00000226268	par24	vir_par24	OK	8.43566	16.1042	0.93286	1.90906	2.06289	5e-05	0.000280515	yes
LARP1B	ENSG00000138709	par24	vir_par24	OK	13.3455	25.4303	0.930195	1.90553	2.63638	5e-05	0.000280515	yes
RP11-1217F2.1	ENSG00000235095	par24	vir_par24	OK	0.680274	1.29494	0.928694	1.90355	1.47635	0.0004	0.00193713	yes
YRDC	ENSG00000196449	par24	vir_par24	OK	6.89312	13.0756	0.923647	1.8969	2.14785	5e-05	0.000280515	yes
ARRDC3	ENSG00000113369	par24	vir_par24	OK	14.5857	27.6623	0.923365	1.89653	2.25295	5e-05	0.000280515	yes
DUSP5	ENSG00000138166	par24	vir_par24	OK	3.59505	6.79692	0.918869	1.89063	2.17429	5e-05	0.000280515	yes
MANF	ENSG00000145050	par24	vir_par24	OK	38.8011	73.1938	0.915624	1.88638	2.64693	5e-05	0.000280515	yes
MPZL3	ENSG00000160588	par24	vir_par24	OK	11.6529	21.9495	0.913505	1.88362	2.32591	5e-05	0.000280515	yes
ROCK1P1	ENSG00000263006	par24	vir_par24	OK	1.17142	2.20626	0.913345	1.88341	0.972965	0.01085	0.0366186	yes
IRAK2	ENSG00000134070	par24	vir_par24	OK	0.89137	1.66627	0.902523	1.86933	1.72984	5e-05	0.000280515	yes
TSPYL2	ENSG00000184205	par24	vir_par24	OK	6.75251	12.611	0.901182	1.8676	2.19088	5e-05	0.000280515	yes
XDH	ENSG00000158125	par24	vir_par24	OK	1.17777	2.19906	0.900834	1.86715	1.71087	5e-05	0.000280515	yes
MXD1	ENSG00000059728	par24	vir_par24	OK	4.88179	9.01625	0.885118	1.84692	2.01543	5e-05	0.000280515	yes
RND3	ENSG00000115963	par24	vir_par24	OK	31.4664	57.9365	0.880661	1.84122	2.68677	5e-05	0.000280515	yes
LONRF3	ENSG00000175556	par24	vir_par24	OK	1.60515	2.94542	0.875767	1.83498	1.70371	5e-05	0.000280515	yes
MAFF	ENSG00000185022	par24	vir_par24	OK	7.30485	13.3639	0.871414	1.82946	1.55364	0.0004	0.00193713	yes
TNFAIP3	ENSG00000118503	par24	vir_par24	OK	0.913114	1.66976	0.870776	1.82865	0.998644	0.0019	0.00791327	yes
DUSP10	ENSG00000143507	par24	vir_par24	OK	1.51071	2.75584	0.867268	1.82421	1.62574	5e-05	0.000280515	yes
MRPS31P5	ENSG00000243406	par24	vir_par24	OK	3.4691	6.30754	0.862517	1.81821	1.14324	0.0045	0.0170022	yes
GPCPD1	ENSG00000125772	par24	vir_par24	OK	5.82014	10.5724	0.861174	1.81652	1.53649	0.0001	0.000538822	yes
ZBTB43	ENSG00000169155	par24	vir_par24	OK	6.44625	11.6576	0.854735	1.80843	1.11097	0.0002	0.00102556	yes
TM4SF1	ENSG00000169908	par24	vir_par24	OK	32.679	58.9557	0.85127	1.80409	2.30378	5e-05	0.000280515	yes
MIS12	ENSG00000167842	par24	vir_par24	OK	30.1	53.9939	0.843034	1.79382	1.62142	5e-05	0.000280515	yes
CDR2	ENSG00000140743	par24	vir_par24	OK	8.94792	15.9647	0.835259	1.78418	1.73163	5e-05	0.000280515	yes
HBEGF	ENSG00000113070	par24	vir_par24	OK	2.78853	4.9381	0.824452	1.77086	1.76445	5e-05	0.000280515	yes
FUT1	ENSG00000174951	par24	vir_par24	OK	5.2604	9.30954	0.823537	1.76974	1.93549	5e-05	0.000280515	yes
DNAJC3	ENSG00000102580	par24	vir_par24	OK	34.0995	59.8403	0.811364	1.75487	2.84845	5e-05	0.000280515	yes
DCUN1D2	ENSG00000150401	par24	vir_par24	OK	13.0407	22.8601	0.809814	1.75299	1.39175	0.0005	0.00237265	yes
ZNF184	ENSG00000096654	par24	vir_par24	OK	6.14249	10.695	0.800039	1.74115	2.17495	5e-05	0.000280515	yes
HRH1	ENSG00000196639	par24	vir_par24	OK	4.51276	7.82815	0.794663	1.73467	1.88461	5e-05	0.000280515	yes
ZC3H12C	ENSG00000149289	par24	vir_par24	OK	1.58864	2.73339	0.782899	1.72058	1.91545	5e-05	0.000280515	yes
CCNYL1	ENSG00000163249	par24	vir_par24	OK	6.58972	11.3272	0.781496	1.71891	2.08884	5e-05	0.000280515	yes
MCL1	ENSG00000143384	par24	vir_par24	OK	77.6666	133.204	0.778268	1.71507	2.7477	5e-05	0.000280515	yes
PRDM4	ENSG00000110851	par24	vir_par24	OK	12.2867	21.0664	0.77785	1.71457	1.97007	5e-05	0.000280515	yes
SYBU	ENSG00000147642	par24	vir_par24	OK	0.787373	1.34155	0.768783	1.70383	0.55814	0.0006	0.00279836	yes
XBP1	ENSG00000100219	par24	vir_par24	OK	59.4247	101.185	0.767862	1.70274	2.63111	5e-05	0.000280515	yes
ZNF699	ENSG00000196110	par24	vir_par24	OK	5.97174	10.1534	0.765738	1.70024	1.70023	5e-05	0.000280515	yes
NABP1	ENSG00000173559	par24	vir_par24	OK	9.82906	16.6521	0.760577	1.69417	1.71157	5e-05	0.000280515	yes
TRIM36	ENSG00000152503	par24	vir_par24	OK	0.903811	1.53039	0.759803	1.69326	1.01831	0.0009	0.00404232	yes
USPL1	ENSG00000132952	par24	vir_par24	OK	15.7529	26.6719	0.759703	1.69314	1.92616	5e-05	0.000280515	yes
DNAJC27	ENSG00000115137	par24	vir_par24	OK	2.78306	4.70902	0.758757	1.69203	1.13931	0.0003	0.00148912	yes
VIMP	ENSG00000131871	par24	vir_par24	OK	20.9752	35.436	0.756531	1.68942	2.1592	5e-05	0.000280515	yes
TSC22D2	ENSG00000196428	par24	vir_par24	OK	11.3105	19.107	0.756445	1.68932	1.70432	5e-05	0.000280515	yes
LINS	ENSG00000140471	par24	vir_par24	OK	11.6934	19.6977	0.752338	1.68452	0.990555	0.01005	0.0342541	yes
CDC25A	ENSG00000164045	par24	vir_par24	OK	9.04511	15.2315	0.751851	1.68395	1.98396	5e-05	0.000280515	yes
MAP3K14	ENSG00000006062	par24	vir_par24	OK	2.12794	3.58251	0.751511	1.68356	1.26545	0.00045	0.00215616	yes
RP11-443N24.1	ENSG00000255725	par24	vir_par24	OK	11.4586	19.2461	0.748133	1.67962	1.25211	0.00195	0.0080971	yes
ZMYM5	ENSG00000132950	par24	vir_par24	OK	9.41786	15.8155	0.747864	1.6793	1.79631	0.0001	0.000538822	yes
CEP85L	ENSG00000111860	par24	vir_par24	OK	1.73254	2.90522	0.745762	1.67686	1.31141	0.0001	0.000538822	yes
NDEL1	ENSG00000166579	par24	vir_par24	OK	15.113	25.1428	0.73436	1.66366	0.832239	0.01045	0.0354386	yes
ZNF555	ENSG00000186300	par24	vir_par24	OK	2.90958	4.8339	0.732379	1.66138	1.39547	0.0001	0.000538822	yes
ZNF527	ENSG00000189164	par24	vir_par24	OK	7.56247	12.5296	0.728417	1.65682	1.37001	0.00175	0.00735233	yes
NFKBIB	ENSG00000104825	par24	vir_par24	OK	4.85541	8.03739	0.727135	1.65535	1.31676	0.0013	0.00562895	yes
SIAH2	ENSG00000181788	par24	vir_par24	OK	13.4768	22.2075	0.720565	1.64783	2.0782	5e-05	0.000280515	yes
MSH6	ENSG00000116062	par24	vir_par24	OK	4.8245	7.91323	0.713887	1.64022	0.9026	0.00495	0.0184936	yes
FOSL1	ENSG00000175592	par24	vir_par24	OK	2.66685	4.36293	0.710157	1.63598	1.3592	0.0006	0.00279836	yes
ZBTB49	ENSG00000168826	par24	vir_par24	OK	1.40326	2.29214	0.707915	1.63344	1.03802	0.00185	0.00772735	yes
CDC37L1	ENSG00000106993	par24	vir_par24	OK	6.20191	10.1154	0.705772	1.63102	1.85785	5e-05	0.000280515	yes
SELK	ENSG00000113811	par24	vir_par24	OK	36.7373	59.7196	0.700961	1.62559	1.95163	5e-05	0.000280515	yes
ZNF543	ENSG00000178229	par24	vir_par24	OK	2.60661	4.2246	0.696641	1.62073	1.67801	5e-05	0.000280515	yes
RP9	ENSG00000164610	par24	vir_par24	OK	2.00779	3.24534	0.692761	1.61637	1.15292	0.0022	0.00902119	yes
PARD6B	ENSG00000124171	par24	vir_par24	OK	17.7902	28.7187	0.690905	1.6143	2.24413	5e-05	0.000280515	yes
ZNF57	ENSG00000171970	par24	vir_par24	OK	7.22924	11.653	0.688788	1.61193	1.8148	5e-05	0.000280515	yes
C16orf72	ENSG00000182831	par24	vir_par24	OK	8.55912	13.7863	0.687696	1.61071	1.03644	0.0121	0.0402249	yes
TASP1	ENSG00000089123	par24	vir_par24	OK	11.9911	19.296	0.686335	1.60919	1.55454	0.0001	0.000538822	yes
WHAMM	ENSG00000156232	par24	vir_par24	OK	2.97772	4.77642	0.681722	1.60405	1.47342	0.0001	0.000538822	yes
EGR2	ENSG00000122877	par24	vir_par24	OK	2.06057	3.3046	0.681435	1.60373	1.42297	0.00075	0.00342499	yes
NEURL3	ENSG00000163121	par24	vir_par24	OK	1.191	1.90716	0.679252	1.60131	1.1064	0.0043	0.0163297	yes
FUT4	ENSG00000196371	par24	vir_par24	OK	9.04625	14.3834	0.669017	1.58999	2.03173	5e-05	0.000280515	yes
NRBF2	ENSG00000148572	par24	vir_par24	OK	6.85793	10.8778	0.665538	1.58616	1.6342	5e-05	0.000280515	yes
SLC2A3	ENSG00000059804	par24	vir_par24	OK	22.096	35.0122	0.664075	1.58455	1.21713	0.0038	0.0146441	yes
USP36	ENSG00000055483	par24	vir_par24	OK	18.4088	29.1511	0.663154	1.58354	1.25387	0.00115	0.0050426	yes
COG3	ENSG00000136152	par24	vir_par24	OK	14.57	22.9659	0.65649	1.57624	1.97909	5e-05	0.000280515	yes
SLC25A33	ENSG00000171612	par24	vir_par24	OK	2.26843	3.57405	0.655863	1.57556	1.50856	0.00015	0.000786087	yes
TUFT1	ENSG00000143367	par24	vir_par24	OK	11.6191	18.2977	0.655162	1.57479	1.88205	5e-05	0.000280515	yes
LARP1BP1	ENSG00000231442	par24	vir_par24	OK	1.05503	1.6599	0.653805	1.57331	1.08389	0.0071	0.0253539	yes
CEBPB	ENSG00000172216	par24	vir_par24	OK	5.02754	7.86939	0.646398	1.56526	1.48294	0.0004	0.00193713	yes
IER3	ENSG00000137331	par24	vir_par24	OK	21.8566	34.1706	0.644687	1.5634	1.84348	5e-05	0.000280515	yes
NFXL1	ENSG00000170448	par24	vir_par24	OK	14.1523	22.1141	0.643929	1.56258	1.12411	0.00035	0.0017153	yes
PIGA	ENSG00000165195	par24	vir_par24	OK	7.31197	11.4056	0.641415	1.55986	1.04431	0.0077	0.0272115	yes
ZSCAN12P1	ENSG00000219891	par24	vir_par24	OK	3.86148	5.98354	0.631846	1.54955	1.11153	0.0026	0.0104611	yes
JMJD6	ENSG00000070495	par24	vir_par24	OK	4.80596	7.43583	0.629671	1.54721	1.3821	0.0003	0.00148912	yes
PPP1R15A	ENSG00000087074	par24	vir_par24	OK	16.5273	25.5529	0.628632	1.5461	2.01421	5e-05	0.000280515	yes
PGM3	ENSG00000013375	par24	vir_par24	OK	82.7109	127.869	0.628514	1.54597	1.14788	0.00355	0.0137904	yes
AKIRIN1	ENSG00000174574	par24	vir_par24	OK	25.6414	39.408	0.620013	1.53689	1.80142	5e-05	0.000280515	yes
PDP1	ENSG00000164951	par24	vir_par24	OK	12.8605	19.756	0.619347	1.53618	1.86801	5e-05	0.000280515	yes
RAPGEF2	ENSG00000109756	par24	vir_par24	OK	22.2311	34.1291	0.618421	1.53519	1.08379	0.00485	0.0181623	yes
UGCG	ENSG00000148154	par24	vir_par24	OK	22.7675	34.9417	0.61797	1.53471	1.89665	5e-05	0.000280515	yes
RP5-850E9.3	ENSG00000270299	par24	vir_par24	OK	32.1737	49.3623	0.617528	1.53424	1.69309	0.0001	0.000538822	yes
SLC20A1	ENSG00000144136	par24	vir_par24	OK	33.404	51.228	0.616914	1.53359	1.73643	5e-05	0.000280515	yes
FAM46B	ENSG00000158246	par24	vir_par24	OK	2.60256	3.98654	0.615203	1.53177	1.31718	0.001	0.00444512	yes
MAPK6	ENSG00000069956	par24	vir_par24	OK	27.0313	41.3397	0.612894	1.52932	0.867596	0.00725	0.0258246	yes
SESN2	ENSG00000130766	par24	vir_par24	OK	6.07741	9.26583	0.608465	1.52464	1.65356	5e-05	0.000280515	yes
RASSF1	ENSG00000068028	par24	vir_par24	OK	4.05435	6.1665	0.604982	1.52096	1.28994	0.00165	0.00697706	yes
ZNF140	ENSG00000196387	par24	vir_par24	OK	9.71511	14.7733	0.604686	1.52065	1.45937	0.00025	0.00125904	yes
NFIL3	ENSG00000165030	par24	vir_par24	OK	5.10755	7.74834	0.601257	1.51704	1.48303	0.00035	0.0017153	yes
NRARP	ENSG00000198435	par24	vir_par24	OK	9.96471	15.1028	0.599912	1.51562	1.69109	5e-05	0.000280515	yes
GZF1	ENSG00000125812	par24	vir_par24	OK	6.39217	9.68233	0.599048	1.51472	1.66221	5e-05	0.000280515	yes
PTBP2	ENSG00000117569	par24	vir_par24	OK	14.1137	21.3598	0.597795	1.5134	1.23841	0.0003	0.00148912	yes
MCPH1	ENSG00000147316	par24	vir_par24	OK	13.2509	20.0497	0.597491	1.51308	1.67733	5e-05	0.000280515	yes
ZNF416	ENSG00000083817	par24	vir_par24	OK	4.0866	6.18257	0.597307	1.51289	1.44529	0.0003	0.00148912	yes
PIM3	ENSG00000198355	par24	vir_par24	OK	7.78876	11.7629	0.594772	1.51023	1.53954	0.0001	0.000538822	yes
TIPARP	ENSG00000163659	par24	vir_par24	OK	16.6836	25.1528	0.592282	1.50763	1.79848	5e-05	0.000280515	yes
EPC1	ENSG00000120616	par24	vir_par24	OK	11.6859	17.6162	0.592137	1.50748	1.43029	5e-05	0.000280515	yes
SLC7A11	ENSG00000151012	par24	vir_par24	OK	24.3173	36.6046	0.590041	1.50529	2.00207	5e-05	0.000280515	yes
ZNF823	ENSG00000197933	par24	vir_par24	OK	6.20044	9.31321	0.586906	1.50202	1.34908	0.0008	0.00363136	yes
TMEM39A	ENSG00000176142	par24	vir_par24	OK	39.3858	59.1391	0.586439	1.50154	1.13809	0.0052	0.0193097	yes
THUMPD2	ENSG00000138050	par24	vir_par24	OK	7.55817	11.3387	0.585149	1.50019	1.29981	0.00065	0.00300853	yes
SLC25A32	ENSG00000164933	par24	vir_par24	OK	13.7129	20.5656	0.584706	1.49973	1.07048	0.0061	0.02221	yes
GPR3	ENSG00000181773	par24	vir_par24	OK	1.6347	2.45018	0.583864	1.49886	1.06281	0.0092	0.0317385	yes
ARRDC4	ENSG00000140450	par24	vir_par24	OK	24.1358	36.1705	0.583637	1.49862	1.88305	5e-05	0.000280515	yes
RIPK4	ENSG00000183421	par24	vir_par24	OK	2.92102	4.37664	0.58335	1.49832	1.43104	0.00065	0.00300853	yes
SUCO	ENSG00000094975	par24	vir_par24	OK	22.4232	33.5616	0.581819	1.49674	1.52361	5e-05	0.000280515	yes
HERC1	ENSG00000103657	par24	vir_par24	OK	4.55764	6.81832	0.58113	1.49602	0.578994	0.00265	0.0106403	yes
LRIG2	ENSG00000198799	par24	vir_par24	OK	8.64581	12.9273	0.580352	1.49521	0.988547	0.0004	0.00193713	yes
KRT20	ENSG00000171431	par24	vir_par24	OK	4.32494	2.83381	-0.609935	-1.52619	-1.18804	0.00235	0.00956308	yes
APOD	ENSG00000189058	par24	vir_par24	OK	3.69505	2.39737	-0.624145	-1.5413	-1.09547	0.0047	0.017663	yes
ECHDC2	ENSG00000121310	par24	vir_par24	OK	17.0483	10.9338	-0.640835	-1.55923	-1.06992	0.0079	0.0278292	yes
RP11-504P24.8	ENSG00000272645	par24	vir_par24	OK	1.58741	1.00985	-0.652533	-1.57193	-1.04768	0.01055	0.0357321	yes
P2RX1	ENSG00000108405	par24	vir_par24	OK	2.00641	1.22332	-0.713813	-1.64013	-1.18034	0.00275	0.0109946	yes
GSTM2	ENSG00000213366	par24	vir_par24	OK	4.41074	2.65066	-0.73467	-1.66402	-1.18959	0.00165	0.00697706	yes
REG4	ENSG00000134193	par24	vir_par24	OK	77.3793	46.2474	-0.742577	-1.67316	-2.38251	5e-05	0.000280515	yes
NEAT1	ENSG00000245532	par24	vir_par24	OK	107.301	62.977	-0.768761	-1.70381	-1.65588	5e-05	0.000280515	yes
CCDC64B	ENSG00000162069	par24	vir_par24	OK	5.1391	3.0064	-0.773481	-1.70939	-1.28358	0.0019	0.00791327	yes
CTD-2203K17.1	ENSG00000249572	par24	vir_par24	OK	4.09067	2.38842	-0.776283	-1.71271	-1.10333	0.00855	0.0298008	yes
SPTBN4	ENSG00000160460	par24	vir_par24	OK	1.58728	0.911408	-0.800389	-1.74157	-0.89745	0.0144	0.0466795	yes
MT-RNR2	ENSG00000210082	par24	vir_par24	OK	2155.41	1176.05	-0.874014	-1.83276	-2.3918	5e-05	0.000280515	yes
UBA7	ENSG00000182179	par24	vir_par24	OK	2.28349	1.22501	-0.898447	-1.86406	-0.929054	0.0061	0.02221	yes
MT-ND3	ENSG00000198840	par24	vir_par24	OK	9207.84	4862.38	-0.921202	-1.89369	-3.17493	5e-05	0.000280515	yes
MT-CO3	ENSG00000198938	par24	vir_par24	OK	10212.6	5140.63	-0.990331	-1.98664	-2.22952	5e-05	0.000280515	yes
MALAT1	ENSG00000251562	par24	vir_par24	OK	131.846	64.2236	-1.03768	-2.05292	-2.58273	5e-05	0.000280515	yes
ARHGAP33	ENSG00000004777	par24	vir_par24	OK	2.84229	1.36109	-1.06229	-2.08824	-0.960605	0.0041	0.0156615	yes
MT-CO1	ENSG00000198804	par24	vir_par24	OK	4655.75	2184.8	-1.09151	-2.13097	-3.53821	5e-05	0.000280515	yes
MT-CYB	ENSG00000198727	par24	vir_par24	OK	3921.66	1810.11	-1.11539	-2.16654	-3.19951	5e-05	0.000280515	yes
MT-ND5	ENSG00000198786	par24	vir_par24	OK	1721.05	788.082	-1.12687	-2.18384	-3.47202	5e-05	0.000280515	yes
MT-CO2	ENSG00000198712	par24	vir_par24	OK	9486.18	4263.75	-1.15371	-2.22485	-3.55931	5e-05	0.000280515	yes
CD164L2	ENSG00000174950	par24	vir_par24	OK	2.02023	0.896328	-1.17242	-2.25389	-1.66934	0.00015	0.000786087	yes
MTND4P12	ENSG00000247627	par24	vir_par24	OK	10.9607	4.80823	-1.18876	-2.27957	-1.42945	0.00095	0.0042445	yes
MTND2P28	ENSG00000225630	par24	vir_par24	OK	62.7231	27.4742	-1.19092	-2.28298	-1.96011	5e-05	0.000280515	yes
MT-ND2	ENSG00000198763	par24	vir_par24	OK	1675.53	725.6	-1.20737	-2.30916	-4.15827	5e-05	0.000280515	yes
MT-ND4	ENSG00000198886	par24	vir_par24	OK	4631.06	1988.22	-1.21987	-2.32926	-3.16246	5e-05	0.000280515	yes
MT-ND1	ENSG00000198888	par24	vir_par24	OK	2825.68	1212.34	-1.2208	-2.33076	-3.88234	5e-05	0.000280515	yes
MT-ATP6	ENSG00000198899	par24	vir_par24	OK	3165.62	1344.15	-1.23579	-2.3551	-1.21176	0.006	0.0218915	yes
MTATP6P1	ENSG00000248527	par24	vir_par24	OK	283.993	115.765	-1.29466	-2.45319	-3.37786	5e-05	0.000280515	yes
MT-ND6	ENSG00000198695	par24	vir_par24	OK	587.531	238.871	-1.29844	-2.45963	-4.39509	5e-05	0.000280515	yes
MT-ATP8	ENSG00000228253	par24	vir_par24	OK	61401.9	24350.8	-1.33431	-2.52155	-1.33262	0.002	0.00828258	yes
MT-ND4L	ENSG00000212907	par24	vir_par24	OK	29919.7	11836.2	-1.33789	-2.52781	-2.40602	5e-05	0.000280515	yes

## Sheet: BCoV vs coinfection 72 hpi
Supplementary table S2: Differentially expressed genes (DEGs) mapped to Homo sapiens when single infections (BCoV or C. parvum) are compared with co-infected cells at 24 and 72 hpi. Positive fold-change values indicate gene upregulation in co-infected HCT-8 cells.
gene	gene_ID	sample_1	sample_2	status	value_1	value_2	log2_FC	Fold Change (FC)	test_stat	p_value	q_value	significant
CTC-534B23.1	ENSG00000251066	vir72	vir_par72	OK	0.577952	1.33166	1.2042	2.30409	1.31992	0.0039	0.0149856	yes
HSPA6	ENSG00000173110	vir72	vir_par72	OK	7.0397	14.3248	1.02493	2.03486	2.84116	5e-05	0.000280515	yes
CRYAB	ENSG00000109846	vir72	vir_par72	OK	14.6641	28.8831	0.97794	1.96965	2.04021	5e-05	0.000280515	yes
SERPINA1	ENSG00000197249	vir72	vir_par72	OK	2.96542	5.47829	0.885489	1.84739	1.48679	5e-05	0.000280515	yes
LRRCC1	ENSG00000133739	vir72	vir_par72	OK	1.06281	1.86179	0.808809	1.75176	1.46392	0.0002	0.00102556	yes
RPL34P18	ENSG00000240509	vir72	vir_par72	OK	23.8124	40.7584	0.775387	1.71165	1.47879	0.00055	0.00258647	yes
RIMS3	ENSG00000117016	vir72	vir_par72	OK	2.35419	3.96101	0.750636	1.68253	1.97042	5e-05	0.000280515	yes
BX322557.10	ENSG00000215447	vir72	vir_par72	OK	2.46949	4.09161	0.728455	1.65686	1.33796	0.0007	0.00321832	yes
UBE2L6	ENSG00000156587	vir72	vir_par72	OK	3.61986	5.99035	0.726707	1.65486	1.46237	0.00025	0.00125904	yes
ZNF518B	ENSG00000178163	vir72	vir_par72	OK	0.635578	1.00875	0.666424	1.58713	1.00774	0.00475	0.0178285	yes
MEGF8	ENSG00000105429	vir72	vir_par72	OK	2.24747	3.5238	0.64883	1.5679	1.151	0.0012	0.00523774	yes
RPL3P9	ENSG00000240540	vir72	vir_par72	OK	3.35773	5.26189	0.648095	1.5671	1.26453	0.00255	0.0102846	yes
EEF1A1P16	ENSG00000213235	vir72	vir_par72	OK	4.07073	6.19375	0.605525	1.52153	1.26356	0.0022	0.00902119	yes
RP11-67L2.2	ENSG00000273033	vir72	vir_par72	OK	1.34646	2.04041	0.599685	1.51539	1.28688	0.0016	0.00678703	yes
BACE2	ENSG00000182240	vir72	vir_par72	OK	10.3918	15.7106	0.596294	1.51183	1.16667	0.00245	0.00992345	yes
ARL2	ENSG00000213465	vir72	vir_par72	OK	14.7216	22.0882	0.585337	1.50039	1.06975	0.0106	0.0358803	yes
FAM24B	ENSG00000213185	vir72	vir_par72	OK	29.0795	19.4352	-0.581331	-1.49623	-1.29138	0.00165	0.00697706	yes
SNHG16	ENSG00000163597	vir72	vir_par72	OK	296.771	197.329	-0.588746	-1.50394	-1.63884	5e-05	0.000280515	yes
KRT20	ENSG00000171431	vir72	vir_par72	OK	3.9219	2.58715	-0.60019	-1.51592	-1.09542	0.0044	0.016667	yes
MTRR	ENSG00000124275	vir72	vir_par72	OK	96.9274	62.4087	-0.635158	-1.55311	-1.21847	0.0016	0.00678703	yes
ACVR2A	ENSG00000121989	vir72	vir_par72	OK	20.8218	12.9893	-0.680771	-1.603	-1.0495	0.0105	0.0355836	yes
ATP8B3	ENSG00000130270	vir72	vir_par72	OK	6.72215	4.16939	-0.689089	-1.61227	-1.2232	0.0029	0.0115239	yes
RP11-484N16.1	ENSG00000266304	vir72	vir_par72	OK	11.7131	5.61052	-1.06191	-2.08769	-1.52107	0.00085	0.0038374	yes
DMKN	ENSG00000161249	vir72	vir_par72	OK	2.48955	1.05785	-1.23475	-2.35341	-0.823804	5e-05	0.000280515	yes
GPR89B	ENSG00000188092	vir72	vir_par72	OK	6.43815	2.38009	-1.43563	-2.705	-2.03865	5e-05	0.000280515	yes
SCARNA2	ENSG00000270066	vir72	vir_par72	OK	2.06741	0.525341	-1.9765	-3.93537	-1.38004	0.00115	0.0050426	yes

## Sheet: C parvum vs coinfection 72 hpi
Supplementary table S2: Differentially expressed genes (DEGs) mapped to Homo sapiens when single infections (BCoV or C. parvum) are compared with co-infected cells at 24 and 72 hpi. Positive fold-change values indicate gene upregulation in co-infected HCT-8 cells.
gene	sample1	sample_2	status	value_1	value_2	log2_FC	Fold Change (FC)	test_stat	p_value	q_value	significant
IL8	par72	vir_par72	OK	8.33897	1640.89	7.62039	196.773	16.0673	5e-05	0.000280515	yes
CXCL2	par72	vir_par72	OK	1.37119	192.212	7.13113	140.179	13.3143	5e-05	0.000280515	yes
ANKRD1	par72	vir_par72	OK	0.812092	97.8807	6.91324	120.529	14.4809	5e-05	0.000280515	yes
KIAA1239	par72	vir_par72	OK	0.054341	6.33447	6.86504	116.569	10.2496	5e-05	0.000280515	yes
GCNT4	par72	vir_par72	OK	0.0340319	2.53368	6.2182	74.45	4.75933	5e-05	0.000280515	yes
CRYAB	par72	vir_par72	OK	0.396022	28.8831	6.1885	72.933	2.50945	5e-05	0.000280515	yes
LTB	par72	vir_par72	OK	0.0870344	6.18596	6.15127	71.075	2.45102	0.0002	0.00102556	yes
RSAD2	par72	vir_par72	OK	0.221297	15.19	6.10099	68.6406	3.53837	5e-05	0.000280515	yes
MMP13	par72	vir_par72	OK	0.0844729	5.16552	5.93428	61.15	4.452	5e-05	0.000280515	yes
RP11-383J24.1	par72	vir_par72	OK	0.631421	35.0838	5.79606	55.5633	6.21088	5e-05	0.000280515	yes
IL1A	par72	vir_par72	OK	1.06007	58.6006	5.78869	55.2802	12.2005	5e-05	0.000280515	yes
CBR3	par72	vir_par72	OK	0.523694	24.2508	5.53317	46.3074	3.58488	0.0014	0.00601694	yes
CXCL1	par72	vir_par72	OK	0.65349	29.4195	5.49246	45.0189	8.23871	5e-05	0.000280515	yes
TM4SF1	par72	vir_par72	OK	42.1292	1832.24	5.44264	43.4908	14.338	5e-05	0.000280515	yes
FSTL4	par72	vir_par72	OK	0.12985	5.48187	5.39975	42.2169	2.67819	5e-05	0.000280515	yes
TNFAIP3	par72	vir_par72	OK	0.887846	37.2336	5.39015	41.9369	7.98383	5e-05	0.000280515	yes
SPDYA	par72	vir_par72	OK	0.0394893	1.62574	5.36349	41.1691	0.283989	0.0001	0.000538822	yes
C6orf141	par72	vir_par72	OK	0.371631	13.8216	5.21691	37.1917	4.60523	5e-05	0.000280515	yes
DKK1	par72	vir_par72	OK	0.346868	11.5563	5.05815	33.3162	4.09274	5e-05	0.000280515	yes
RNU6-31P	par72	vir_par72	OK	101.464	3064.83	4.91676	30.2059	10.9773	0.0033	0.0129193	yes
DMRT1	par72	vir_par72	OK	0.103334	3.07564	4.8955	29.7641	3.87512	5e-05	0.000280515	yes
CXCL3	par72	vir_par72	OK	3.83112	111.978	4.86931	29.2286	11.08	5e-05	0.000280515	yes
OSGIN1	par72	vir_par72	OK	3.44582	91.9754	4.73833	26.6919	5.29603	5e-05	0.000280515	yes
DTNA	par72	vir_par72	OK	0.837236	22.3471	4.73831	26.6915	3.85542	5e-05	0.000280515	yes
AOC3	par72	vir_par72	OK	0.214435	5.35705	4.64283	24.9822	3.55531	5e-05	0.000280515	yes
EDN1	par72	vir_par72	OK	1.17877	29.4147	4.64119	24.9538	9.88541	5e-05	0.000280515	yes
SRXN1	par72	vir_par72	OK	13.4459	311.48	4.5339	23.1654	3.52117	5e-05	0.000280515	yes
PLAGL1	par72	vir_par72	OK	0.377338	8.68359	4.52436	23.0127	5.53031	5e-05	0.000280515	yes
RNU6ATAC	par72	vir_par72	OK	75.2803	1691.87	4.4902	22.4742	4.55842	5e-05	0.000280515	yes
NECAB2	par72	vir_par72	OK	0.0499075	1.04914	4.39381	21.0217	0.868439	0.0016	0.00678703	yes
TNFRSF9	par72	vir_par72	OK	1.04699	21.8364	4.38242	20.8564	7.78847	5e-05	0.000280515	yes
C4orf19	par72	vir_par72	OK	1.92351	38.8761	4.33707	20.211	7.08631	5e-05	0.000280515	yes
DNAH17	par72	vir_par72	OK	0.0550127	1.10968	4.33423	20.1713	0.630423	5e-05	0.000280515	yes
FBXO16	par72	vir_par72	OK	10.831	212.977	4.29746	19.6637	5.04576	5e-05	0.000280515	yes
CCRN4L	par72	vir_par72	OK	2.38413	45.5112	4.25469	19.0893	4.49575	5e-05	0.000280515	yes
CLEC4A	par72	vir_par72	OK	0.457384	8.49341	4.21486	18.5695	3.07657	5e-05	0.000280515	yes
KPNA7	par72	vir_par72	OK	0.128628	2.38256	4.21123	18.5228	4.34428	5e-05	0.000280515	yes
DUSP10	par72	vir_par72	OK	1.36653	24.8115	4.18242	18.1566	9.0332	5e-05	0.000280515	yes
GEM	par72	vir_par72	OK	6.59163	118.348	4.16626	17.9543	11.514	5e-05	0.000280515	yes
RP11-77H9.2	par72	vir_par72	OK	0.388596	6.80168	4.12955	17.5032	1.29814	0.00445	0.0168332	yes
PLA2G4C	par72	vir_par72	OK	1.23946	21.1644	4.09385	17.0754	3.82474	5e-05	0.000280515	yes
TRIML2	par72	vir_par72	OK	0.126883	2.13133	4.07018	16.7976	1.70535	0.0003	0.00148912	yes
NEURL3	par72	vir_par72	OK	1.11591	18.7353	4.06947	16.7893	7.36064	5e-05	0.000280515	yes
TINCR	par72	vir_par72	OK	0.221381	3.66705	4.05002	16.5645	3.14405	5e-05	0.000280515	yes
SFN	par72	vir_par72	OK	10.9531	177.658	4.01969	16.2199	10.333	5e-05	0.000280515	yes
ALDH8A1	par72	vir_par72	OK	0.110843	1.76746	3.99509	15.9456	1.6034	5e-05	0.000280515	yes
ALOXE3	par72	vir_par72	OK	1.20908	19.1315	3.98397	15.8232	8.02506	5e-05	0.000280515	yes
ZNF474	par72	vir_par72	OK	0.0633309	1.00156	3.9832	15.8148	0.871086	0.00015	0.000786087	yes
IRAK2	par72	vir_par72	OK	1.06222	16.7457	3.97863	15.7647	8.99216	5e-05	0.000280515	yes
PLEKHO1	par72	vir_par72	OK	0.634691	10.002	3.97809	15.7588	4.68295	5e-05	0.000280515	yes
VTRNA2-1	par72	vir_par72	OK	33.4069	516.424	3.95034	15.4586	2.96385	0.0001	0.000538822	yes
DUSP5	par72	vir_par72	OK	12.8759	196.956	3.93512	15.2964	12.3167	5e-05	0.000280515	yes
PDE10A	par72	vir_par72	OK	0.0854764	1.30301	3.93017	15.244	2.21253	5e-05	0.000280515	yes
BCL6	par72	vir_par72	OK	10.0687	148.893	3.88632	14.7876	4.6534	5e-05	0.000280515	yes
TRPV3	par72	vir_par72	OK	1.68062	24.7476	3.88022	14.7252	7.55013	5e-05	0.000280515	yes
HSPB8	par72	vir_par72	OK	0.127125	1.85884	3.87008	14.6221	1.43404	0.00255	0.0102846	yes
CDKN2B	par72	vir_par72	OK	0.453018	6.54509	3.85277	14.4477	2.02265	0.0005	0.00237265	yes
AOC2	par72	vir_par72	OK	0.595693	8.57565	3.8476	14.396	7.43267	5e-05	0.000280515	yes
ZC3H12A	par72	vir_par72	OK	3.17082	45.6172	3.84665	14.3866	5.609	5e-05	0.000280515	yes
RELB	par72	vir_par72	OK	2.93162	42.0038	3.84075	14.3278	6.93374	5e-05	0.000280515	yes
INSIG1	par72	vir_par72	OK	103.131	1468.06	3.83136	14.2349	11.2671	5e-05	0.000280515	yes
MATN1-AS1	par72	vir_par72	OK	0.688742	9.58703	3.79905	13.9196	4.13128	5e-05	0.000280515	yes
DNAJC25,DNAJC25-GNG10	par72	vir_par72	OK	3.33314	46.1426	3.79114	13.8435	7.91983	5e-05	0.000280515	yes
CASS4	par72	vir_par72	OK	0.0783055	1.04644	3.74024	13.3636	3.19881	5e-05	0.000280515	yes
RND1	par72	vir_par72	OK	1.23387	16.4433	3.73623	13.3265	6.29443	5e-05	0.000280515	yes
SPON1	par72	vir_par72	OK	0.0934918	1.23803	3.72706	13.2421	3.47218	5e-05	0.000280515	yes
OASL	par72	vir_par72	OK	1.03395	13.5414	3.71115	13.0969	7.23006	5e-05	0.000280515	yes
FAM46A	par72	vir_par72	OK	10.7702	139.519	3.69534	12.9541	9.08826	5e-05	0.000280515	yes
MIS12	par72	vir_par72	OK	33.1152	418.577	3.65992	12.64	7.2653	5e-05	0.000280515	yes
SIK1	par72	vir_par72	OK	7.84915	97.9975	3.64214	12.4851	9.80693	5e-05	0.000280515	yes
CA3	par72	vir_par72	OK	0.15692	1.95283	3.63747	12.4448	0.84797	0.00075	0.00342499	yes
DUSP1	par72	vir_par72	OK	7.98504	99.1517	3.63427	12.4172	9.88043	5e-05	0.000280515	yes
AC093616.4	par72	vir_par72	OK	0.167095	2.0198	3.59548	12.0878	3.82976	5e-05	0.000280515	yes
RAB30	par72	vir_par72	OK	5.05246	60.4559	3.58082	11.9656	2.60225	5e-05	0.000280515	yes
RP11-58E21.3	par72	vir_par72	OK	0.087147	1.02783	3.56	11.7942	0.717311	5e-05	0.000280515	yes
GUCA1B	par72	vir_par72	OK	2.04553	23.7015	3.53443	11.587	7.38128	5e-05	0.000280515	yes
SDCBP2	par72	vir_par72	OK	2.04901	23.6763	3.53045	11.555	3.20058	5e-05	0.000280515	yes
FOSL1	par72	vir_par72	OK	5.24698	60.3424	3.52361	11.5004	8.50494	5e-05	0.000280515	yes
MFSD2A	par72	vir_par72	OK	1.92619	21.8898	3.50644	11.3643	5.69445	5e-05	0.000280515	yes
ASIC4	par72	vir_par72	OK	0.119978	1.36195	3.50483	11.3516	1.02085	5e-05	0.000280515	yes
CFLAR-AS1	par72	vir_par72	OK	0.24251	2.73951	3.4978	11.2965	0.638067	5e-05	0.000280515	yes
FIGF	par72	vir_par72	OK	0.103983	1.15729	3.47634	11.1297	1.65576	0.00665	0.0239524	yes
AMIGO3	par72	vir_par72	OK	0.929722	10.2774	3.46653	11.0543	2.69967	5e-05	0.000280515	yes
PTGR1	par72	vir_par72	OK	55.768	614.328	3.4615	11.0158	9.64615	5e-05	0.000280515	yes
CSRNP1	par72	vir_par72	OK	6.32893	69.2927	3.45267	10.9486	9.68631	5e-05	0.000280515	yes
RELT	par72	vir_par72	OK	1.43095	15.5739	3.44409	10.8836	6.66156	5e-05	0.000280515	yes
ZBTB49	par72	vir_par72	OK	1.57512	17.0821	3.43895	10.8449	5.28271	5e-05	0.000280515	yes
DNAJB9	par72	vir_par72	OK	29.4142	318.982	3.43889	10.8445	7.74149	5e-05	0.000280515	yes
ZNF165	par72	vir_par72	OK	7.32422	79.2931	3.43645	10.8262	10.0113	5e-05	0.000280515	yes
NR4A3	par72	vir_par72	OK	0.460808	4.97491	3.43243	10.796	6.60731	5e-05	0.000280515	yes
LYG1	par72	vir_par72	OK	0.639769	6.87665	3.42608	10.7486	0.57767	0.0021	0.00865243	yes
CREB5	par72	vir_par72	OK	4.1938	45.0548	3.42535	10.7432	3.63863	5e-05	0.000280515	yes
C2orf82	par72	vir_par72	OK	0.527459	5.6597	3.42359	10.7301	0.725515	0.0001	0.000538822	yes
RP11-24F11.2	par72	vir_par72	OK	0.37125	3.97264	3.41964	10.7007	3.23266	5e-05	0.000280515	yes
CYR61	par72	vir_par72	OK	16.7193	178.729	3.41818	10.6899	10.5013	5e-05	0.000280515	yes
DDR2	par72	vir_par72	OK	0.259525	2.77426	3.41816	10.6898	2.39466	5e-05	0.000280515	yes
PMEPA1	par72	vir_par72	OK	1.34572	14.1485	3.3942	10.5137	6.45899	5e-05	0.000280515	yes
ITPKC	par72	vir_par72	OK	4.33552	45.2615	3.38401	10.4397	5.59688	5e-05	0.000280515	yes
E2F6	par72	vir_par72	OK	7.26602	75.744	3.3819	10.4245	8.53928	5e-05	0.000280515	yes
DLX2	par72	vir_par72	OK	0.205231	2.13659	3.37999	10.4107	4.06147	5e-05	0.000280515	yes
ZSCAN12P1	par72	vir_par72	OK	6.51686	67.6397	3.37562	10.3792	8.12813	5e-05	0.000280515	yes
ADM	par72	vir_par72	OK	4.66496	48.1679	3.36813	10.3254	5.76295	5e-05	0.000280515	yes
GLA	par72	vir_par72	OK	11.2309	115.276	3.35954	10.2641	3.4224	5e-05	0.000280515	yes
BIRC3	par72	vir_par72	OK	4.51623	46.1528	3.35323	10.2193	5.18323	5e-05	0.000280515	yes
MIR22HG	par72	vir_par72	OK	8.28047	82.4528	3.31578	9.95748	5.43916	5e-05	0.000280515	yes
MAP3K14	par72	vir_par72	OK	1.52668	15.2011	3.3157	9.95692	5.88552	5e-05	0.000280515	yes
CTD-2547E10.2	par72	vir_par72	OK	0.671009	6.67206	3.31373	9.94334	2.23222	5e-05	0.000280515	yes
MAP2	par72	vir_par72	OK	3.28771	32.5606	3.30797	9.90372	6.93306	5e-05	0.000280515	yes
AC006262.6	par72	vir_par72	OK	0.358961	3.53623	3.30032	9.85134	4.49843	5e-05	0.000280515	yes
NFKBIA	par72	vir_par72	OK	11.2122	109.804	3.29179	9.79327	9.20236	5e-05	0.000280515	yes
HMGCS1	par72	vir_par72	OK	110.774	1063.27	3.26282	9.59857	9.26869	5e-05	0.000280515	yes
RFPL3S	par72	vir_par72	OK	0.516923	4.90014	3.2448	9.47943	2.4771	5e-05	0.000280515	yes
SGK1	par72	vir_par72	OK	5.07754	48.1168	3.24434	9.47641	5.10796	5e-05	0.000280515	yes
SLC9A5	par72	vir_par72	OK	0.555458	5.26297	3.24413	9.47503	2.55895	5e-05	0.000280515	yes
RP3-449M8.6	par72	vir_par72	OK	0.280172	2.61584	3.22289	9.33655	2.26922	0.00045	0.00215616	yes
FAM46B	par72	vir_par72	OK	1.26268	11.7366	3.21646	9.29503	6.63888	5e-05	0.000280515	yes
SNORD3B-1	par72	vir_par72	OK	0.238959	2.20522	3.20608	9.2284	1.56348	0.0066	0.0237922	yes
RGS2	par72	vir_par72	OK	1.33339	12.2602	3.20081	9.19475	5.57288	5e-05	0.000280515	yes
FTLP2	par72	vir_par72	OK	7.41046	68.0518	3.199	9.18322	6.66886	5e-05	0.000280515	yes
IL12A	par72	vir_par72	OK	0.552457	5.07208	3.19864	9.18093	1.61614	5e-05	0.000280515	yes
RASSF1	par72	vir_par72	OK	4.85876	44.2095	3.1857	9.09895	7.90684	5e-05	0.000280515	yes
KLF6	par72	vir_par72	OK	57.464	521.671	3.18241	9.07822	8.40129	5e-05	0.000280515	yes
ABCC2	par72	vir_par72	OK	0.132026	1.1884	3.17013	9.00128	1.89902	5e-05	0.000280515	yes
SLC20A1	par72	vir_par72	OK	30.5857	273.182	3.15894	8.93173	7.87494	5e-05	0.000280515	yes
AC099522.1	par72	vir_par72	OK	0.455715	4.02676	3.14342	8.83616	4.78723	5e-05	0.000280515	yes
FSTL3	par72	vir_par72	OK	17.2414	151.567	3.13601	8.79089	9.66204	5e-05	0.000280515	yes
FICD	par72	vir_par72	OK	3.43742	30.0744	3.12914	8.74913	4.14546	5e-05	0.000280515	yes
FLRT3	par72	vir_par72	OK	0.595725	5.20718	3.12778	8.74089	3.32067	5e-05	0.000280515	yes
SEC31A	par72	vir_par72	OK	23.6622	204.884	3.11415	8.6587	3.33261	5e-05	0.000280515	yes
YPEL4	par72	vir_par72	OK	0.70358	6.06555	3.10785	8.62097	2.29229	5e-05	0.000280515	yes
CABYR	par72	vir_par72	OK	4.77031	41.0169	3.10406	8.59835	2.49949	5e-05	0.000280515	yes
MANF	par72	vir_par72	OK	52.0259	446.142	3.1002	8.57538	9.55457	5e-05	0.000280515	yes
TMEM39A	par72	vir_par72	OK	52.8843	453.356	3.09973	8.57258	5.58351	5e-05	0.000280515	yes
FTL	par72	vir_par72	OK	4461.5	38200.1	3.09798	8.56219	6.08988	5e-05	0.000280515	yes
CCT6P3	par72	vir_par72	OK	0.837721	7.17198	3.09783	8.5613	4.46432	5e-05	0.000280515	yes
SLC25A25	par72	vir_par72	OK	8.70378	74.428	3.09613	8.55122	8.06439	5e-05	0.000280515	yes
TM4SF1-AS1	par72	vir_par72	OK	0.270266	2.27645	3.07433	8.42298	0.352838	0.0091	0.0314403	yes
ZBTB43	par72	vir_par72	OK	7.30328	61.4634	3.07311	8.41586	5.7192	5e-05	0.000280515	yes
NFKBIE	par72	vir_par72	OK	2.08542	17.5503	3.07309	8.41574	3.82853	5e-05	0.000280515	yes
IL6R	par72	vir_par72	OK	2.13632	17.917	3.06813	8.38686	6.55425	5e-05	0.000280515	yes
DNAJB1P1	par72	vir_par72	OK	0.147546	1.23187	3.06162	8.3491	2.50119	0.0002	0.00102556	yes
SNHG15	par72	vir_par72	OK	27.4702	229.327	3.06146	8.34817	8.37128	5e-05	0.000280515	yes
ETS1	par72	vir_par72	OK	5.55216	46.2855	3.05944	8.33649	8.45737	5e-05	0.000280515	yes
VIMP	par72	vir_par72	OK	33.5102	276.606	3.04516	8.25438	9.75525	5e-05	0.000280515	yes
NABP1	par72	vir_par72	OK	10.768	88.0451	3.03149	8.17654	7.77318	5e-05	0.000280515	yes
SERTAD1	par72	vir_par72	OK	3.48019	28.4401	3.03069	8.172	7.20589	5e-05	0.000280515	yes
RASGRP3	par72	vir_par72	OK	0.824405	6.73672	3.03062	8.17161	2.48291	5e-05	0.000280515	yes
TUBA8	par72	vir_par72	OK	0.180825	1.47487	3.02793	8.15639	0.599873	0.0036	0.0139619	yes
EIF2AK3	par72	vir_par72	OK	13.7114	111.834	3.02792	8.15633	6.24043	5e-05	0.000280515	yes
GMPPB	par72	vir_par72	OK	6.35281	51.7793	3.02691	8.15062	4.62543	5e-05	0.000280515	yes
TNFRSF12A	par72	vir_par72	OK	54.0745	439.586	3.02313	8.12929	9.22923	5e-05	0.000280515	yes
CLIP4	par72	vir_par72	OK	5.27019	42.811	3.02205	8.12321	4.35684	5e-05	0.000280515	yes
SEC24D	par72	vir_par72	OK	14.3241	115.309	3.00898	8.04995	8.67381	5e-05	0.000280515	yes
CTRL	par72	vir_par72	OK	0.697554	5.60319	3.00587	8.03262	1.29366	5e-05	0.000280515	yes
AC005062.2	par72	vir_par72	OK	0.672389	5.36999	2.99755	7.98643	0.568985	0.0001	0.000538822	yes
BHLHA15	par72	vir_par72	OK	0.568496	4.53457	2.99575	7.97647	3.21562	5e-05	0.000280515	yes
PPIF	par72	vir_par72	OK	20.8267	165.767	2.99265	7.95935	9.12558	5e-05	0.000280515	yes
NFKBIB	par72	vir_par72	OK	6.04752	48.0042	2.98875	7.93786	6.31212	5e-05	0.000280515	yes
IL10RA	par72	vir_par72	OK	1.19121	9.39682	2.97975	7.88849	3.41348	5e-05	0.000280515	yes
GCLC	par72	vir_par72	OK	80.4724	625.25	2.95787	7.76976	8.46866	5e-05	0.000280515	yes
RP11-23P13.7	par72	vir_par72	OK	1.35881	10.5571	2.95779	7.76933	1.70048	0.0017	0.00716419	yes
RP11-345J4.8	par72	vir_par72	OK	0.671789	5.17913	2.94663	7.70946	4.58338	5e-05	0.000280515	yes
GPNMB	par72	vir_par72	OK	0.560959	4.27977	2.93157	7.6294	2.35853	5e-05	0.000280515	yes
ZFAND2A	par72	vir_par72	OK	15.4709	117.876	2.92965	7.61926	7.15413	5e-05	0.000280515	yes
TDG	par72	vir_par72	OK	13.4642	101.799	2.91853	7.56075	7.31564	5e-05	0.000280515	yes
FTLP3	par72	vir_par72	OK	111.483	840.911	2.91513	7.54296	7.74579	5e-05	0.000280515	yes
ARRDC3	par72	vir_par72	OK	18.0761	135.683	2.90809	7.50624	7.8562	5e-05	0.000280515	yes
MICB	par72	vir_par72	OK	2.109	15.8073	2.90596	7.49516	5.83538	5e-05	0.000280515	yes
44258	par72	vir_par72	OK	1.03879	7.78281	2.90539	7.4922	3.65192	5e-05	0.000280515	yes
PLIN2	par72	vir_par72	OK	13.5479	101.492	2.90523	7.49137	6.93583	5e-05	0.000280515	yes
TSPYL2	par72	vir_par72	OK	9.10278	68.1038	2.90336	7.48167	8.33806	5e-05	0.000280515	yes
TTLL7	par72	vir_par72	OK	1.59041	11.8849	2.90166	7.47286	4.18392	5e-05	0.000280515	yes
HMOX1	par72	vir_par72	OK	3.25647	24.259	2.89714	7.44948	6.27498	5e-05	0.000280515	yes
PEA15	par72	vir_par72	OK	96.6313	718.591	2.89461	7.43643	6.70226	5e-05	0.000280515	yes
SQSTM1	par72	vir_par72	OK	193.845	1439.14	2.89223	7.42417	8.05868	5e-05	0.000280515	yes
RASGEF1B	par72	vir_par72	OK	0.724659	5.37876	2.8919	7.42247	4.01048	5e-05	0.000280515	yes
MMP10	par72	vir_par72	OK	0.302079	2.24094	2.8911	7.41836	1.45473	0.0098	0.0335194	yes
AGAP6	par72	vir_par72	OK	0.648153	4.80133	2.88903	7.40772	5.49344	5e-05	0.000280515	yes
MUC4	par72	vir_par72	OK	0.885431	6.53459	2.88365	7.38015	2.86947	5e-05	0.000280515	yes
FOSB	par72	vir_par72	OK	3.40686	25.13	2.88289	7.37626	3.15618	5e-05	0.000280515	yes
PIWIL2	par72	vir_par72	OK	0.969692	7.14578	2.88149	7.36911	4.21258	5e-05	0.000280515	yes
CXCL5	par72	vir_par72	OK	26.401	194.317	2.87975	7.36023	9.45083	5e-05	0.000280515	yes
RIMKLB	par72	vir_par72	OK	1.28325	9.41854	2.8757	7.33959	3.17951	5e-05	0.000280515	yes
AC004980.7	par72	vir_par72	OK	1.01127	7.38477	2.86839	7.3025	1.89133	5e-05	0.000280515	yes
MSANTD3	par72	vir_par72	OK	5.87401	42.6214	2.85916	7.25593	6.26429	5e-05	0.000280515	yes
SOCS3	par72	vir_par72	OK	0.711901	5.14209	2.85261	7.22306	4.82276	5e-05	0.000280515	yes
MMP1	par72	vir_par72	OK	1.25247	9.00241	2.84554	7.18775	4.71845	5e-05	0.000280515	yes
JMJD1C	par72	vir_par72	OK	19.1481	137.334	2.84241	7.17217	4.38332	5e-05	0.000280515	yes
STK17A	par72	vir_par72	OK	11.4635	81.816	2.83533	7.13706	5.6147	5e-05	0.000280515	yes
DNAJB5	par72	vir_par72	OK	3.34909	23.8526	2.83231	7.12214	6.89423	5e-05	0.000280515	yes
RP5-1159O4.2	par72	vir_par72	OK	0.152379	1.08518	2.8322	7.12159	2.7611	5e-05	0.000280515	yes
TP53INP2	par72	vir_par72	OK	6.08256	43.0434	2.82304	7.07652	4.11418	5e-05	0.000280515	yes
JMJD6	par72	vir_par72	OK	6.24412	44.0348	2.81807	7.05218	7.25262	5e-05	0.000280515	yes
C3orf52	par72	vir_par72	OK	11.005	77.5857	2.81764	7.05008	8.22386	5e-05	0.000280515	yes
USPL1	par72	vir_par72	OK	19.2581	134.864	2.80797	7.00299	7.57721	5e-05	0.000280515	yes
RP11-443P15.2	par72	vir_par72	OK	3.10896	21.7128	2.80404	6.98393	4.5128	5e-05	0.000280515	yes
RAET1L	par72	vir_par72	OK	1.93088	13.4823	2.80373	6.98243	5.15297	5e-05	0.000280515	yes
MAFK	par72	vir_par72	OK	4.07839	28.4319	2.80144	6.97136	5.33127	5e-05	0.000280515	yes
ATF3	par72	vir_par72	OK	32.713	227.464	2.7977	6.95331	9.22961	5e-05	0.000280515	yes
TUBB3	par72	vir_par72	OK	1.77703	12.3522	2.79723	6.95105	1.71949	5e-05	0.000280515	yes
GPCPD1	par72	vir_par72	OK	6.62727	45.9988	2.79511	6.94084	5.54501	5e-05	0.000280515	yes
TXNL4B	par72	vir_par72	OK	3.27449	22.7269	2.79506	6.9406	3.63198	5e-05	0.000280515	yes
LURAP1L	par72	vir_par72	OK	59.4169	411.397	2.79158	6.92388	9.50492	5e-05	0.000280515	yes
RP11-443N24.1	par72	vir_par72	OK	13.735	94.8761	2.78819	6.90763	5.43917	5e-05	0.000280515	yes
DNAJB1	par72	vir_par72	OK	55.5695	382.242	2.78212	6.87862	7.37818	5e-05	0.000280515	yes
S100A2	par72	vir_par72	OK	2.19064	15.0056	2.77608	6.84989	4.54891	5e-05	0.000280515	yes
ABL2	par72	vir_par72	OK	5.79161	39.0812	2.75444	6.74791	3.32829	5e-05	0.000280515	yes
PVT1	par72	vir_par72	OK	15.6733	105.618	2.75248	6.73875	4.88277	5e-05	0.000280515	yes
NDEL1	par72	vir_par72	OK	23.5712	158.501	2.7494	6.72437	5.11361	5e-05	0.000280515	yes
AC008132.12	par72	vir_par72	OK	1.36579	9.16922	2.74706	6.71348	4.41614	5e-05	0.000280515	yes
AC141586.5	par72	vir_par72	OK	1.12461	7.50706	2.73882	6.67524	3.70761	5e-05	0.000280515	yes
CCNYL1	par72	vir_par72	OK	7.55205	50.3583	2.73729	6.66817	7.54165	5e-05	0.000280515	yes
LIPG	par72	vir_par72	OK	14.1101	93.6856	2.7311	6.63962	9.04365	5e-05	0.000280515	yes
RGS16	par72	vir_par72	OK	6.89643	45.788	2.73105	6.63939	7.88115	5e-05	0.000280515	yes
AC009404.2	par72	vir_par72	OK	0.968005	6.40797	2.72678	6.61976	3.82635	5e-05	0.000280515	yes
RP11-294O2.2	par72	vir_par72	OK	0.272948	1.80567	2.72584	6.61545	3.39229	5e-05	0.000280515	yes
TUFT1	par72	vir_par72	OK	12.4238	81.9948	2.72243	6.59984	8.53865	5e-05	0.000280515	yes
IGF2BP2	par72	vir_par72	OK	17.6177	116.211	2.72164	6.59622	1.06177	0.0002	0.00102556	yes
HSD17B7P2	par72	vir_par72	OK	2.44443	16.0888	2.71849	6.58184	5.54037	5e-05	0.000280515	yes
DENND5A	par72	vir_par72	OK	17.2095	112.447	2.70797	6.53402	6.01853	5e-05	0.000280515	yes
RND3	par72	vir_par72	OK	54.593	356.516	2.70718	6.53044	8.36149	5e-05	0.000280515	yes
TMED7-TICAM2	par72	vir_par72	OK	2.82247	18.4037	2.70497	6.52044	2.1772	0.00015	0.000786087	yes
AEN	par72	vir_par72	OK	16.1832	105.469	2.70425	6.51719	8.77174	5e-05	0.000280515	yes
NR4A2	par72	vir_par72	OK	0.672501	4.38142	2.70379	6.51511	2.76912	5e-05	0.000280515	yes
BACH2	par72	vir_par72	OK	0.777652	5.05494	2.7005	6.50027	2.3089	5e-05	0.000280515	yes
RP11-61N20.3	par72	vir_par72	OK	9.38676	60.9595	2.69915	6.49419	6.62063	5e-05	0.000280515	yes
HRH1	par72	vir_par72	OK	8.36251	54.2907	2.6987	6.49217	7.58222	5e-05	0.000280515	yes
AC005532.5	par72	vir_par72	OK	0.195865	1.26811	2.69475	6.47442	1.52399	0.0051	0.0189869	yes
HIST1H4D	par72	vir_par72	OK	2.99155	19.3253	2.69153	6.45998	3.72191	5e-05	0.000280515	yes
ZNF823	par72	vir_par72	OK	6.63193	42.7867	2.68966	6.45161	6.59599	5e-05	0.000280515	yes
SNAI1	par72	vir_par72	OK	1.73466	11.1652	2.68628	6.43652	4.97277	5e-05	0.000280515	yes
UAP1	par72	vir_par72	OK	20.1791	129.864	2.68607	6.43558	8.53254	5e-05	0.000280515	yes
CBR3-AS1	par72	vir_par72	OK	4.74385	30.5162	2.68545	6.43281	3.25468	5e-05	0.000280515	yes
MCAM	par72	vir_par72	OK	4.33797	27.8861	2.68445	6.42836	5.26621	5e-05	0.000280515	yes
PIM3	par72	vir_par72	OK	13.4024	85.9823	2.68155	6.41545	8.07853	5e-05	0.000280515	yes
CDC37L1	par72	vir_par72	OK	8.13914	51.7632	2.66898	6.35979	8.04421	5e-05	0.000280515	yes
NRIP3	par72	vir_par72	OK	0.602831	3.80654	2.65866	6.31446	3.53969	5e-05	0.000280515	yes
KCTD5	par72	vir_par72	OK	7.46099	46.985	2.65476	6.29742	7.35202	5e-05	0.000280515	yes
AGPAT9	par72	vir_par72	OK	10.2898	64.7776	2.65428	6.29532	7.76607	5e-05	0.000280515	yes
WHAMM	par72	vir_par72	OK	3.03775	19.0807	2.65104	6.2812	6.63074	5e-05	0.000280515	yes
PGM3	par72	vir_par72	OK	94.9359	592.558	2.64193	6.24166	4.93238	5e-05	0.000280515	yes
YRDC	par72	vir_par72	OK	13.3221	82.8617	2.63688	6.21985	7.47265	5e-05	0.000280515	yes
XDH	par72	vir_par72	OK	2.20916	13.74	2.63681	6.21955	6.77375	5e-05	0.000280515	yes
CLDN4	par72	vir_par72	OK	137.715	854.552	2.63348	6.20521	7.87357	5e-05	0.000280515	yes
NKIRAS1	par72	vir_par72	OK	7.26699	44.9441	2.6287	6.18468	1.10022	5e-05	0.000280515	yes
PSG4	par72	vir_par72	OK	0.610857	3.77233	2.62655	6.17547	2.57823	5e-05	0.000280515	yes
RGCC	par72	vir_par72	OK	0.270165	1.658	2.61753	6.13698	1.75773	5e-05	0.000280515	yes
RP1-232L22	par72	vir_par72	OK	3.00102	18.3371	2.61124	6.11029	5.84171	5e-05	0.000280515	yes
AKAP17A	par72	vir_par72	OK	3.5207	21.4394	2.60633	6.08953	7.1108	5e-05	0.000280515	yes
LONRF3	par72	vir_par72	OK	4.583	27.8803	2.60488	6.08341	7.07549	5e-05	0.000280515	yes
RASD1	par72	vir_par72	OK	0.428658	2.60109	2.60122	6.068	3.68933	5e-05	0.000280515	yes
RIPK4	par72	vir_par72	OK	2.75257	16.6579	2.59735	6.05174	6.74873	5e-05	0.000280515	yes
PRDM4	par72	vir_par72	OK	13.5047	81.4394	2.59227	6.03047	6.8605	5e-05	0.000280515	yes
VCPKMT	par72	vir_par72	OK	4.61612	27.7617	2.58834	6.01406	5.79733	5e-05	0.000280515	yes
ZEB1	par72	vir_par72	OK	1.11466	6.68497	2.58432	5.99733	0.794681	5e-05	0.000280515	yes
IPPK	par72	vir_par72	OK	4.09935	24.563	2.58302	5.99193	2.25329	5e-05	0.000280515	yes
SAMD4A	par72	vir_par72	OK	7.05112	42.2304	2.58236	5.98919	6.38868	5e-05	0.000280515	yes
MAFF	par72	vir_par72	OK	15.7258	93.9066	2.57809	5.97149	7.29941	5e-05	0.000280515	yes
PISD	par72	vir_par72	OK	14.3796	85.0102	2.56361	5.91185	3.50627	5e-05	0.000280515	yes
ABCG2	par72	vir_par72	OK	1.77796	10.4982	2.56185	5.90464	2.46368	5e-05	0.000280515	yes
CTA-941F9.9	par72	vir_par72	OK	1.28503	7.58157	2.56069	5.8999	3.2245	5e-05	0.000280515	yes
TRIB1	par72	vir_par72	OK	15.599	91.9041	2.55868	5.89168	7.30321	5e-05	0.000280515	yes
USP36	par72	vir_par72	OK	26.0368	152.911	2.55407	5.87289	5.68899	5e-05	0.000280515	yes
RPL13AP20	par72	vir_par72	OK	0.380473	2.23157	2.5522	5.86528	2.04443	5e-05	0.000280515	yes
PPARGC1A	par72	vir_par72	OK	0.262576	1.5353	2.54771	5.84705	0.919176	5e-05	0.000280515	yes
PHLDB2	par72	vir_par72	OK	0.702631	4.09543	2.54318	5.82872	2.44496	5e-05	0.000280515	yes
ZMYM5	par72	vir_par72	OK	11.9591	69.6791	2.54262	5.82646	6.67445	5e-05	0.000280515	yes
UTP15	par72	vir_par72	OK	17.0287	98.5057	2.53224	5.78469	5.63871	5e-05	0.000280515	yes
USP53	par72	vir_par72	OK	20.2847	117.333	2.53214	5.78429	5.40417	5e-05	0.000280515	yes
LCAT	par72	vir_par72	OK	3.53429	20.4383	2.53178	5.78285	2.29651	5e-05	0.000280515	yes
TIPARP	par72	vir_par72	OK	19.196	110.886	2.5302	5.77652	8.14315	5e-05	0.000280515	yes
CDR2	par72	vir_par72	OK	13.6649	78.756	2.52692	5.7634	6.21471	5e-05	0.000280515	yes
THUMPD2	par72	vir_par72	OK	6.88555	39.4488	2.51834	5.72923	5.82313	5e-05	0.000280515	yes
PEAR1	par72	vir_par72	OK	4.22285	24.1799	2.51752	5.72597	6.72039	5e-05	0.000280515	yes
TMC7	par72	vir_par72	OK	1.38435	7.92184	2.51663	5.72244	3.20807	5e-05	0.000280515	yes
CD83	par72	vir_par72	OK	1.41579	8.01114	2.5004	5.65842	5.27138	5e-05	0.000280515	yes
TASP1	par72	vir_par72	OK	13.1379	74.2548	2.49875	5.65196	5.90646	5e-05	0.000280515	yes
ALKBH1	par72	vir_par72	OK	5.80011	32.7536	2.4975	5.64706	6.35814	5e-05	0.000280515	yes
GAS2L3	par72	vir_par72	OK	29.2399	165.029	2.49671	5.64397	6.11859	5e-05	0.000280515	yes
NEDD9	par72	vir_par72	OK	5.98421	33.7533	2.49579	5.64037	7.02552	5e-05	0.000280515	yes
NPC1	par72	vir_par72	OK	32.3182	182.069	2.49407	5.63365	5.7057	5e-05	0.000280515	yes
HIVEP2	par72	vir_par72	OK	4.65108	26.198	2.49382	5.63267	1.03397	0.0002	0.00102556	yes
TFE3	par72	vir_par72	OK	13.0953	73.5088	2.48887	5.61338	6.14433	5e-05	0.000280515	yes
IL32	par72	vir_par72	OK	12.2209	68.4213	2.4851	5.59873	6.10848	5e-05	0.000280515	yes
SEMA7A	par72	vir_par72	OK	1.64541	9.17835	2.47979	5.57816	4.30803	5e-05	0.000280515	yes
FAM53C	par72	vir_par72	OK	33.1598	184.665	2.4774	5.56893	5.0595	5e-05	0.000280515	yes
GADD45A	par72	vir_par72	OK	26.8853	149.622	2.47644	5.56522	8.06757	5e-05	0.000280515	yes
EAF2	par72	vir_par72	OK	2.60107	14.2796	2.45678	5.4899	4.69044	5e-05	0.000280515	yes
C3orf35	par72	vir_par72	OK	0.290962	1.59106	2.45109	5.46829	2.76869	5e-05	0.000280515	yes
LARP1B	par72	vir_par72	OK	22.011	120.3	2.45034	5.46545	7.79366	5e-05	0.000280515	yes
CNTD2	par72	vir_par72	OK	1.62669	8.86789	2.44665	5.45149	3.61628	5e-05	0.000280515	yes
KCNJ14	par72	vir_par72	OK	2.95937	16.115	2.44504	5.44541	2.49367	5e-05	0.000280515	yes
NOXRED1	par72	vir_par72	OK	0.215226	1.17164	2.44461	5.44378	2.01168	5e-05	0.000280515	yes
CSF1	par72	vir_par72	OK	3.08473	16.775	2.4431	5.43809	2.77902	5e-05	0.000280515	yes
HPS5	par72	vir_par72	OK	11.4051	61.9716	2.44193	5.43368	5.0638	5e-05	0.000280515	yes
KRTAP5-AS1	par72	vir_par72	OK	0.226772	1.23184	2.4415	5.43206	0.96866	0.00295	0.011699	yes
PDXDC2P	par72	vir_par72	OK	1.54874	8.37997	2.43585	5.41083	3.72065	5e-05	0.000280515	yes
RAB9A	par72	vir_par72	OK	11.2724	60.9478	2.43478	5.40682	5.66812	5e-05	0.000280515	yes
PPP1R15A	par72	vir_par72	OK	58.2096	314.356	2.43307	5.40041	8.20327	5e-05	0.000280515	yes
ZNF267	par72	vir_par72	OK	8.80637	47.4842	2.43083	5.39204	4.81166	5e-05	0.000280515	yes
LDLR	par72	vir_par72	OK	45.9328	247.507	2.42987	5.38845	5.12776	5e-05	0.000280515	yes
GCNT2	par72	vir_par72	OK	2.16312	11.6537	2.4296	5.38744	2.55709	5e-05	0.000280515	yes
RPS6KC1	par72	vir_par72	OK	10.5612	56.8388	2.4281	5.38184	4.73906	5e-05	0.000280515	yes
OSER1	par72	vir_par72	OK	44.2055	237.038	2.42282	5.36218	8.15614	5e-05	0.000280515	yes
DHDH	par72	vir_par72	OK	0.949912	5.09011	2.42183	5.3585	3.21001	5e-05	0.000280515	yes
ISG20	par72	vir_par72	OK	4.4571	23.8499	2.4198	5.35097	3.62286	5e-05	0.000280515	yes
PREB	par72	vir_par72	OK	26.8622	142.998	2.41235	5.32341	5.94092	5e-05	0.000280515	yes
BRF2	par72	vir_par72	OK	4.6473	24.6879	2.40934	5.31231	5.23151	5e-05	0.000280515	yes
TLR6	par72	vir_par72	OK	0.241308	1.27664	2.40341	5.29052	1.31292	5e-05	0.000280515	yes
MAD2L1BP	par72	vir_par72	OK	50.3799	266.527	2.40336	5.29034	6.4536	5e-05	0.000280515	yes
ZNF143	par72	vir_par72	OK	16.4721	86.9526	2.4002	5.27876	4.46082	5e-05	0.000280515	yes
PTBP2	par72	vir_par72	OK	8.41999	44.333	2.39649	5.26521	5.24778	5e-05	0.000280515	yes
GK	par72	vir_par72	OK	1.24912	6.53597	2.38748	5.23243	2.86733	5e-05	0.000280515	yes
PSME4	par72	vir_par72	OK	19.8098	103.438	2.38448	5.22156	5.29282	5e-05	0.000280515	yes
LSMEM1	par72	vir_par72	OK	0.826189	4.30613	2.38185	5.21205	0.740248	0.0021	0.00865243	yes
TFAP2E	par72	vir_par72	OK	0.267589	1.39413	2.38127	5.20995	3.06485	5e-05	0.000280515	yes
CDKN2AIP	par72	vir_par72	OK	13.6122	70.8401	2.37966	5.20414	7.30592	5e-05	0.000280515	yes
CEP85L	par72	vir_par72	OK	2.29938	11.9641	2.37939	5.20317	4.84098	5e-05	0.000280515	yes
REL	par72	vir_par72	OK	5.30736	27.5962	2.3784	5.1996	6.90601	5e-05	0.000280515	yes
MIR4435-1HG	par72	vir_par72	OK	36.5976	190.088	2.37684	5.19398	5.7233	5e-05	0.000280515	yes
NPIPB15	par72	vir_par72	OK	0.316323	1.63507	2.36988	5.16898	2.99332	5e-05	0.000280515	yes
TSC22D2	par72	vir_par72	OK	17.8466	91.922	2.36476	5.15067	6.42852	5e-05	0.000280515	yes
ZNF140	par72	vir_par72	OK	12.3499	63.5406	2.36318	5.14503	5.89097	5e-05	0.000280515	yes
HES4	par72	vir_par72	OK	1.00083	5.14171	2.36105	5.13744	3.44511	5e-05	0.000280515	yes
TM4SF19	par72	vir_par72	OK	0.522127	2.68198	2.36082	5.13662	0.529898	0.006	0.0218915	yes
HSPA1B	par72	vir_par72	OK	8.38576	43.0596	2.36032	5.13484	7.2268	5e-05	0.000280515	yes
OSGIN2	par72	vir_par72	OK	18.1961	93.3842	2.35955	5.1321	6.89408	5e-05	0.000280515	yes
SMURF1	par72	vir_par72	OK	9.70023	49.7577	2.35883	5.12954	4.96623	5e-05	0.000280515	yes
ZC3H12C	par72	vir_par72	OK	4.28779	21.9668	2.35702	5.12311	7.37597	5e-05	0.000280515	yes
CADPS2	par72	vir_par72	OK	5.48596	28.0646	2.35494	5.11573	6.26009	5e-05	0.000280515	yes
PHLDA2	par72	vir_par72	OK	8.89101	45.1834	2.34537	5.08191	4.59186	5e-05	0.000280515	yes
STAM	par72	vir_par72	OK	25.598	130.069	2.34518	5.08124	7.52189	5e-05	0.000280515	yes
ATG9B	par72	vir_par72	OK	0.556264	2.8244	2.3441	5.07744	1.66788	5e-05	0.000280515	yes
TRA2B	par72	vir_par72	OK	98.5659	498.909	2.33961	5.06166	6.77934	5e-05	0.000280515	yes
LARP1BP1	par72	vir_par72	OK	1.50773	7.625	2.33835	5.05724	4.63604	5e-05	0.000280515	yes
MICA	par72	vir_par72	OK	8.26777	41.7381	2.33579	5.04827	3.53486	5e-05	0.000280515	yes
HERPUD1	par72	vir_par72	OK	253.939	1280.64	2.33431	5.0431	5.72918	5e-05	0.000280515	yes
LYSMD3	par72	vir_par72	OK	22.4574	113.208	2.33371	5.041	7.06402	5e-05	0.000280515	yes
RP11-1217F2.1	par72	vir_par72	OK	0.810706	4.0832	2.33245	5.0366	4.17278	5e-05	0.000280515	yes
C2orf54	par72	vir_par72	OK	1.53223	7.69649	2.32856	5.02304	3.83527	5e-05	0.000280515	yes
NKAIN1	par72	vir_par72	OK	0.276872	1.39019	2.32799	5.02105	1.50107	5e-05	0.000280515	yes
KIF16B	par72	vir_par72	OK	5.46714	27.3932	2.32496	5.01052	7.40281	5e-05	0.000280515	yes
ZNF778	par72	vir_par72	OK	1.8988	9.51382	2.32494	5.01045	3.71996	5e-05	0.000280515	yes
TBC1D30	par72	vir_par72	OK	6.02283	30.1623	2.32424	5.00802	3.44112	5e-05	0.000280515	yes
DNAJC6	par72	vir_par72	OK	2.95521	14.7733	2.32166	4.99907	4.33029	5e-05	0.000280515	yes
ARID3B	par72	vir_par72	OK	1.04955	5.23408	2.31816	4.98696	2.12887	5e-05	0.000280515	yes
LRRC8E	par72	vir_par72	OK	15.1491	75.493	2.31711	4.98333	3.63003	5e-05	0.000280515	yes
AQP3	par72	vir_par72	OK	21.7223	108.174	2.31611	4.97988	7.20174	5e-05	0.000280515	yes
SLC31A2	par72	vir_par72	OK	3.34311	16.6379	2.31521	4.97677	2.76049	5e-05	0.000280515	yes
PROX1	par72	vir_par72	OK	0.946788	4.70861	2.31419	4.97325	1.43061	5e-05	0.000280515	yes
NXF1	par72	vir_par72	OK	43.4677	215.884	2.31224	4.96654	3.84815	5e-05	0.000280515	yes
CAV1	par72	vir_par72	OK	0.935618	4.64501	2.31169	4.96464	3.58804	5e-05	0.000280515	yes
MSH6	par72	vir_par72	OK	2.93811	14.5711	2.31015	4.95935	2.5494	5e-05	0.000280515	yes
HPX	par72	vir_par72	OK	0.268448	1.32888	2.3075	4.95025	0.745194	5e-05	0.000280515	yes
INTS6	par72	vir_par72	OK	23.5914	116.74	2.30697	4.94843	4.75756	5e-05	0.000280515	yes
PPAPDC1B	par72	vir_par72	OK	18.9031	93.4019	2.30483	4.94109	2.26993	5e-05	0.000280515	yes
DNAJB4	par72	vir_par72	OK	23.6338	116.777	2.30483	4.94109	5.65871	5e-05	0.000280515	yes
LUCAT1,RP11-213H15.4	par72	vir_par72	OK	2.20775	10.8965	2.30322	4.93558	3.21022	5e-05	0.000280515	yes
LMCD1	par72	vir_par72	OK	6.22782	30.7312	2.3029	4.93449	4.46843	5e-05	0.000280515	yes
NFXL1	par72	vir_par72	OK	18.069	89.0821	2.30162	4.93011	4.32338	5e-05	0.000280515	yes
ALG14	par72	vir_par72	OK	14.7845	72.612	2.29612	4.91135	1.44641	0.01475	0.047642	yes
MPZL3	par72	vir_par72	OK	26.6081	130.669	2.29598	4.91087	6.19595	5e-05	0.000280515	yes
FRMD5	par72	vir_par72	OK	6.95574	34.1356	2.295	4.90754	5.94281	5e-05	0.000280515	yes
PLCXD2	par72	vir_par72	OK	1.21313	5.9523	2.29471	4.90655	1.83236	5e-05	0.000280515	yes
ZNF57	par72	vir_par72	OK	7.974	39.1223	2.29462	4.90625	6.56681	5e-05	0.000280515	yes
CLCF1	par72	vir_par72	OK	1.3329	6.53097	2.29273	4.89982	2.03311	5e-05	0.000280515	yes
EHD4	par72	vir_par72	OK	14.3059	70.0467	2.29171	4.89636	7.64162	5e-05	0.000280515	yes
ZNF292	par72	vir_par72	OK	8.61518	42.1249	2.28972	4.88961	4.12279	5e-05	0.000280515	yes
AC124861.1	par72	vir_par72	OK	0.366104	1.77986	2.28144	4.86163	1.62701	0.0038	0.0146441	yes
IER3	par72	vir_par72	OK	68.2205	331.517	2.2808	4.85947	7.71401	5e-05	0.000280515	yes
KDM6B	par72	vir_par72	OK	12.5639	61.0311	2.28026	4.85765	1.47622	0.0003	0.00148912	yes
PLK2	par72	vir_par72	OK	27.6257	134.036	2.27853	4.85183	5.48013	5e-05	0.000280515	yes
SPHK1	par72	vir_par72	OK	0.20707	1.00324	2.27648	4.84494	0.625674	0.00075	0.00342499	yes
ABHD4	par72	vir_par72	OK	23.5602	113.735	2.27126	4.82745	3.40075	5e-05	0.000280515	yes
DAB2	par72	vir_par72	OK	8.66526	41.6263	2.26418	4.80381	2.86689	5e-05	0.000280515	yes
EPC1	par72	vir_par72	OK	14.2317	68.2966	2.2627	4.79889	5.98775	5e-05	0.000280515	yes
TIMM23B	par72	vir_par72	OK	0.795472	3.81486	2.26175	4.79573	2.39731	5e-05	0.000280515	yes
DIRAS2	par72	vir_par72	OK	0.851391	4.07538	2.25904	4.78673	4.78109	5e-05	0.000280515	yes
SERPINE1	par72	vir_par72	OK	2.36352	11.3076	2.25829	4.78424	5.51934	5e-05	0.000280515	yes
UPP1	par72	vir_par72	OK	6.07311	29.0449	2.25778	4.78255	4.99877	5e-05	0.000280515	yes
PRPF39	par72	vir_par72	OK	14.6627	69.9964	2.25513	4.77377	4.12232	5e-05	0.000280515	yes
CYP27B1	par72	vir_par72	OK	1.1188	5.33867	2.25453	4.77179	1.41308	5e-05	0.000280515	yes
TICAM1	par72	vir_par72	OK	2.06497	9.84043	2.2526	4.76541	4.85769	5e-05	0.000280515	yes
RP11-540A21.2	par72	vir_par72	OK	0.394405	1.87821	2.25161	4.76214	0.819565	0.01195	0.0397968	yes
MAP3K8	par72	vir_par72	OK	4.23483	20.1331	2.24919	4.75416	4.60258	5e-05	0.000280515	yes
DLL4	par72	vir_par72	OK	0.261883	1.24498	2.24913	4.75396	3.01157	5e-05	0.000280515	yes
LAMA1	par72	vir_par72	OK	0.722781	3.43423	2.24836	4.75142	2.25354	5e-05	0.000280515	yes
ERRFI1	par72	vir_par72	OK	374.755	1779.64	2.24756	4.74879	7.76553	5e-05	0.000280515	yes
LINS	par72	vir_par72	OK	13.3587	63.412	2.24697	4.74685	3.24433	5e-05	0.000280515	yes
TOX4	par72	vir_par72	OK	44.8614	212.748	2.2456	4.74234	3.83106	5e-05	0.000280515	yes
PIM2	par72	vir_par72	OK	9.46506	44.8383	2.24405	4.73725	6.12857	5e-05	0.000280515	yes
PRDM11	par72	vir_par72	OK	1.85361	8.77722	2.24343	4.73522	4.43919	5e-05	0.000280515	yes
DEDD2	par72	vir_par72	OK	8.32578	39.4242	2.24343	4.73522	5.20802	5e-05	0.000280515	yes
ATP10D	par72	vir_par72	OK	1.27821	6.04954	2.2427	4.73282	2.19669	5e-05	0.000280515	yes
SLC22A3	par72	vir_par72	OK	0.549221	2.59574	2.24069	4.72623	4.03977	5e-05	0.000280515	yes
EPHA2	par72	vir_par72	OK	16.1867	76.4066	2.23889	4.72034	6.91658	5e-05	0.000280515	yes
DUSP8	par72	vir_par72	OK	2.85471	13.4453	2.23568	4.70985	2.31772	5e-05	0.000280515	yes
IKBKG	par72	vir_par72	OK	0.840792	3.9524	2.23291	4.70081	1.20653	0.0001	0.000538822	yes
RP11-883A18.3	par72	vir_par72	OK	0.243393	1.14384	2.23253	4.69957	1.94455	0.0002	0.00102556	yes
C1orf109	par72	vir_par72	OK	20.9769	98.4876	2.23114	4.69505	5.96131	5e-05	0.000280515	yes
MED9	par72	vir_par72	OK	8.20672	38.521	2.23077	4.69384	6.03395	5e-05	0.000280515	yes
SLC35B1	par72	vir_par72	OK	30.6884	143.66	2.22689	4.68124	4.14915	5e-05	0.000280515	yes
COG3	par72	vir_par72	OK	23.3485	109.286	2.2267	4.68062	6.63064	5e-05	0.000280515	yes
AMN1	par72	vir_par72	OK	22.3038	104.385	2.22655	4.68013	5.55847	5e-05	0.000280515	yes
SLC43A3	par72	vir_par72	OK	0.292787	1.36834	2.2245	4.67349	0.854562	5e-05	0.000280515	yes
CDK2AP2	par72	vir_par72	OK	12.5077	58.3304	2.22143	4.66355	5.10809	5e-05	0.000280515	yes
LHX5	par72	vir_par72	OK	0.21652	1.00926	2.22073	4.66129	2.60679	5e-05	0.000280515	yes
RP11-337C18.4	par72	vir_par72	OK	0.78659	3.66632	2.22065	4.66103	3.09232	5e-05	0.000280515	yes
ZNF430	par72	vir_par72	OK	18.6587	86.9215	2.21986	4.65848	3.85918	5e-05	0.000280515	yes
SNHG17	par72	vir_par72	OK	18.3901	85.6237	2.21908	4.65596	5.07083	5e-05	0.000280515	yes
GULP1	par72	vir_par72	OK	27.1662	126.365	2.21771	4.65155	5.85988	5e-05	0.000280515	yes
PAK1IP1	par72	vir_par72	OK	18.1041	84.1425	2.21652	4.64771	6.86668	5e-05	0.000280515	yes
HELQ	par72	vir_par72	OK	6.57888	30.5616	2.21581	4.64542	4.82914	5e-05	0.000280515	yes
PIP5K1A	par72	vir_par72	OK	188.294	873.722	2.21419	4.64021	5.30628	5e-05	0.000280515	yes
PSMD10P2	par72	vir_par72	OK	0.465016	2.15577	2.21285	4.6359	2.20021	5e-05	0.000280515	yes
GPR3	par72	vir_par72	OK	1.92107	8.89303	2.21076	4.62919	4.53457	5e-05	0.000280515	yes
HLA-V	par72	vir_par72	OK	0.278902	1.28992	2.20945	4.62499	2.18984	5e-05	0.000280515	yes
MVK	par72	vir_par72	OK	9.03629	41.7583	2.20826	4.62118	3.6454	5e-05	0.000280515	yes
DNHD1	par72	vir_par72	OK	3.77704	17.4454	2.20752	4.61881	2.31357	5e-05	0.000280515	yes
RWDD2A	par72	vir_par72	OK	4.19806	19.3827	2.20698	4.61708	1.69849	0.0001	0.000538822	yes
GOLGA4	par72	vir_par72	OK	20.4796	94.5149	2.20635	4.61506	4.9662	5e-05	0.000280515	yes
BHLHE40	par72	vir_par72	OK	24.9759	115.259	2.20627	4.61481	6.97745	5e-05	0.000280515	yes
VPS37B	par72	vir_par72	OK	10.1518	46.7878	2.2044	4.60883	6.47476	5e-05	0.000280515	yes
AC016831.7	par72	vir_par72	OK	0.734712	3.3747	2.19951	4.59323	2.62405	5e-05	0.000280515	yes
PLK3	par72	vir_par72	OK	7.14858	32.7907	2.19756	4.58703	4.45444	5e-05	0.000280515	yes
CRELD2	par72	vir_par72	OK	8.4866	38.8799	2.19577	4.58134	4.76524	5e-05	0.000280515	yes
LYST	par72	vir_par72	OK	5.18236	23.6798	2.19198	4.56932	2.11474	5e-05	0.000280515	yes
MURC	par72	vir_par72	OK	0.284267	1.29723	2.19012	4.56343	3.28747	5e-05	0.000280515	yes
BRD2	par72	vir_par72	OK	138.252	630.3	2.18874	4.55907	5.43216	5e-05	0.000280515	yes
KIAA1432	par72	vir_par72	OK	9.53749	43.4555	2.18786	4.55629	5.86955	5e-05	0.000280515	yes
NKX3-1	par72	vir_par72	OK	6.14373	27.9341	2.18484	4.54676	6.32642	5e-05	0.000280515	yes
YTHDC1	par72	vir_par72	OK	41.3905	188.105	2.18416	4.54462	4.75674	5e-05	0.000280515	yes
NRBF2	par72	vir_par72	OK	8.6767	39.4324	2.18416	4.54462	6.0727	5e-05	0.000280515	yes
PDIA5	par72	vir_par72	OK	9.30664	42.293	2.18409	4.5444	3.30491	5e-05	0.000280515	yes
BHLHE41	par72	vir_par72	OK	0.647319	2.94086	2.18369	4.54314	0.763483	0.00165	0.00697706	yes
ALG2	par72	vir_par72	OK	28.2492	128.257	2.18275	4.54018	6.85097	5e-05	0.000280515	yes
DDX26B	par72	vir_par72	OK	2.87635	13.0268	2.17917	4.52893	5.39184	5e-05	0.000280515	yes
ZNF513	par72	vir_par72	OK	2.15932	9.73265	2.17225	4.50726	3.92105	5e-05	0.000280515	yes
MED26	par72	vir_par72	OK	1.76522	7.92754	2.16702	4.49095	1.34712	0.0054	0.0199635	yes
SRD5A3-AS1	par72	vir_par72	OK	0.290098	1.30149	2.16555	4.48637	0.697748	5e-05	0.000280515	yes
RHPN2	par72	vir_par72	OK	17.1863	76.8893	2.16152	4.47386	7.01043	5e-05	0.000280515	yes
CASP7	par72	vir_par72	OK	13.9674	62.2258	2.15545	4.45508	6.63429	5e-05	0.000280515	yes
RP11-465B22.3	par72	vir_par72	OK	8.28015	36.8881	2.15543	4.45501	4.45333	5e-05	0.000280515	yes
B3GNT5	par72	vir_par72	OK	9.91491	43.868	2.1455	4.42446	6.17032	5e-05	0.000280515	yes
SPTY2D1	par72	vir_par72	OK	18.3207	81.0566	2.14546	4.42433	5.51446	5e-05	0.000280515	yes
ZNF10	par72	vir_par72	OK	7.21555	31.9057	2.14463	4.42179	2.00188	5e-05	0.000280515	yes
INTS6P1	par72	vir_par72	OK	3.51021	15.4864	2.14138	4.41184	5.38524	5e-05	0.000280515	yes
DIMT1	par72	vir_par72	OK	10.0282	44.1953	2.13983	4.4071	2.76114	5e-05	0.000280515	yes
LIF	par72	vir_par72	OK	4.64465	20.4107	2.13568	4.39444	6.0042	5e-05	0.000280515	yes
MAFG	par72	vir_par72	OK	14.9183	65.503	2.13448	4.39079	6.52694	5e-05	0.000280515	yes
TENM3	par72	vir_par72	OK	11.3036	49.5465	2.13199	4.38322	3.51628	5e-05	0.000280515	yes
TOX4P1	par72	vir_par72	OK	1.54914	6.78835	2.13159	4.382	4.27704	5e-05	0.000280515	yes
C16orf91	par72	vir_par72	OK	3.35901	14.7065	2.13034	4.37821	4.14016	5e-05	0.000280515	yes
HSP90B1	par72	vir_par72	OK	365.233	1599	2.13028	4.37802	6.75272	5e-05	0.000280515	yes
THEMIS2	par72	vir_par72	OK	3.00457	13.1516	2.13001	4.37721	3.54516	5e-05	0.000280515	yes
NFKB2	par72	vir_par72	OK	18.888	82.512	2.12713	4.36848	4.50511	5e-05	0.000280515	yes
PTPRR	par72	vir_par72	OK	2.8484	12.4186	2.12428	4.35985	4.54306	5e-05	0.000280515	yes
PXDC1	par72	vir_par72	OK	12.959	56.4129	2.12207	4.35318	5.67253	5e-05	0.000280515	yes
MTMR11	par72	vir_par72	OK	0.716478	3.11244	2.11905	4.34408	2.59228	5e-05	0.000280515	yes
ZNF431	par72	vir_par72	OK	8.83572	38.341	2.11747	4.33932	3.51912	5e-05	0.000280515	yes
SRP19	par72	vir_par72	OK	24.1697	104.78	2.11609	4.33517	2.67072	5e-05	0.000280515	yes
GABARAPL1	par72	vir_par72	OK	30.0119	129.476	2.10908	4.31416	5.80653	5e-05	0.000280515	yes
PTPRH	par72	vir_par72	OK	4.30663	18.5221	2.10462	4.30084	2.74513	5e-05	0.000280515	yes
COQ10B	par72	vir_par72	OK	19.774	85.0417	2.10456	4.30067	6.24827	5e-05	0.000280515	yes
STK40	par72	vir_par72	OK	26.2571	112.893	2.10417	4.2995	4.85331	5e-05	0.000280515	yes
CLK1	par72	vir_par72	OK	43.4651	186.641	2.10234	4.29405	5.20138	5e-05	0.000280515	yes
PIPSL	par72	vir_par72	OK	9.51963	40.8612	2.10175	4.2923	5.37086	5e-05	0.000280515	yes
SNIP1	par72	vir_par72	OK	9.31446	39.9638	2.10115	4.29051	6.49021	5e-05	0.000280515	yes
SDF2L1	par72	vir_par72	OK	3.74211	16.0468	2.10036	4.28816	4.07375	5e-05	0.000280515	yes
SUCO	par72	vir_par72	OK	28.466	121.844	2.09772	4.28032	6.2136	5e-05	0.000280515	yes
NAMPT	par72	vir_par72	OK	45.6865	195.548	2.09769	4.28023	3.74661	5e-05	0.000280515	yes
TMEM136	par72	vir_par72	OK	5.90289	25.249	2.09673	4.27739	4.16881	5e-05	0.000280515	yes
ZCCHC12	par72	vir_par72	OK	0.242034	1.03502	2.09638	4.27635	2.88769	5e-05	0.000280515	yes
TUBB2A	par72	vir_par72	OK	2.804	11.9792	2.09497	4.27217	4.42109	5e-05	0.000280515	yes
TINAGL1	par72	vir_par72	OK	23.2045	99.1251	2.09485	4.27182	5.36298	5e-05	0.000280515	yes
C1orf162	par72	vir_par72	OK	0.485346	2.06965	2.0923	4.26427	2.37202	5e-05	0.000280515	yes
BMS1P4	par72	vir_par72	OK	0.460593	1.96285	2.09139	4.26158	1.40715	0.00675	0.0242646	yes
TMED9	par72	vir_par72	OK	60.8171	259.147	2.09122	4.26108	7.1872	5e-05	0.000280515	yes
ZIC5	par72	vir_par72	OK	0.605463	2.57989	2.0912	4.26102	4.02306	5e-05	0.000280515	yes
HSP90B2P	par72	vir_par72	OK	28.4473	121.043	2.08916	4.255	6.47655	5e-05	0.000280515	yes
MUL1	par72	vir_par72	OK	8.01153	34.0651	2.08815	4.25202	5.95599	5e-05	0.000280515	yes
HSP90B3P	par72	vir_par72	OK	17.535	74.4401	2.08584	4.24522	6.36004	5e-05	0.000280515	yes
CD274	par72	vir_par72	OK	0.502317	2.12779	2.08269	4.23596	2.13771	5e-05	0.000280515	yes
TRIM36	par72	vir_par72	OK	0.84955	3.59425	2.08092	4.23077	3.05505	5e-05	0.000280515	yes
MCPH1	par72	vir_par72	OK	18.1712	76.8628	2.08063	4.22992	6.39522	5e-05	0.000280515	yes
WIPI1	par72	vir_par72	OK	17.2736	73.0515	2.08034	4.22907	1.56396	0.0001	0.000538822	yes
UBAP1	par72	vir_par72	OK	30.7443	129.966	2.07974	4.22731	6.79942	5e-05	0.000280515	yes
GPR89A	par72	vir_par72	OK	10.3956	43.8516	2.07665	4.21827	3.60518	5e-05	0.000280515	yes
RP11-314A15.2	par72	vir_par72	OK	1.43832	6.0639	2.07586	4.21596	3.58462	5e-05	0.000280515	yes
NECAP1	par72	vir_par72	OK	45.9021	193.352	2.0746	4.21228	4.28947	5e-05	0.000280515	yes
MYLIP	par72	vir_par72	OK	6.71489	28.2271	2.07164	4.20364	5.65003	5e-05	0.000280515	yes
TET2	par72	vir_par72	OK	7.18586	30.2068	2.07164	4.20364	2.16782	5e-05	0.000280515	yes
RP11-645C24.5	par72	vir_par72	OK	0.407036	1.70816	2.06922	4.1966	2.72991	5e-05	0.000280515	yes
PKD1L2	par72	vir_par72	OK	0.445261	1.86675	2.0678	4.19247	1.68697	5e-05	0.000280515	yes
RNVU1-14	par72	vir_par72	OK	10.441	43.7264	2.06625	4.18797	1.68979	0.0009	0.00404232	yes
MX2	par72	vir_par72	OK	0.383977	1.6075	2.06572	4.18643	1.30592	5e-05	0.000280515	yes
ADORA2B	par72	vir_par72	OK	4.6335	19.3959	2.06557	4.18599	4.90785	5e-05	0.000280515	yes
GOSR2,RP11-156P1.2	par72	vir_par72	OK	22.187	92.6162	2.06155	4.17435	5.5737	5e-05	0.000280515	yes
STARD3NL	par72	vir_par72	OK	42.211	176.132	2.06097	4.17267	6.75409	5e-05	0.000280515	yes
DNAJC3	par72	vir_par72	OK	50.7746	211.737	2.0601	4.17015	6.94129	5e-05	0.000280515	yes
TMEFF1	par72	vir_par72	OK	1.69798	7.07175	2.05825	4.16481	2.65936	5e-05	0.000280515	yes
BDKRB2	par72	vir_par72	OK	4.08125	16.9909	2.05768	4.16316	5.83098	5e-05	0.000280515	yes
DERL2	par72	vir_par72	OK	24.2583	100.978	2.05749	4.16261	2.07054	5e-05	0.000280515	yes
ZNF35	par72	vir_par72	OK	7.08545	29.4788	2.05675	4.16048	2.54783	5e-05	0.000280515	yes
RP11-14N7.2	par72	vir_par72	OK	1.99662	8.29853	2.0553	4.1563	1.93359	5e-05	0.000280515	yes
yR211F11.2	par72	vir_par72	OK	0.355812	1.47654	2.05303	4.14977	1.886	0.0012	0.00523774	yes
SLC36A4	par72	vir_par72	OK	4.07293	16.8806	2.05123	4.14459	3.44815	5e-05	0.000280515	yes
DCUN1D3	par72	vir_par72	OK	11.7959	48.7892	2.04828	4.13613	3.10995	5e-05	0.000280515	yes
HKDC1	par72	vir_par72	OK	0.442254	1.82678	2.04636	4.13062	2.14846	5e-05	0.000280515	yes
TXNDC11	par72	vir_par72	OK	18.6717	77.0487	2.04492	4.1265	2.79281	5e-05	0.000280515	yes
PNPLA8	par72	vir_par72	OK	19.2799	79.4981	2.04382	4.12336	3.35189	5e-05	0.000280515	yes
ARFIP2	par72	vir_par72	OK	31.7372	130.707	2.04209	4.11842	6.16581	5e-05	0.000280515	yes
PFKFB3	par72	vir_par72	OK	11.3025	46.5481	2.04207	4.11836	5.74856	5e-05	0.000280515	yes
NLRC5	par72	vir_par72	OK	8.15256	33.5018	2.03891	4.10935	2.68169	5e-05	0.000280515	yes
AC008738.1	par72	vir_par72	OK	8.7925	36.1258	2.03868	4.10869	5.65654	5e-05	0.000280515	yes
NUDT17	par72	vir_par72	OK	0.911911	3.73814	2.03535	4.09922	1.04818	0.0043	0.0163297	yes
BACH1	par72	vir_par72	OK	36.4094	148.906	2.03202	4.08977	3.99184	5e-05	0.000280515	yes
STX3	par72	vir_par72	OK	63.5002	259.294	2.02976	4.08337	6.26941	5e-05	0.000280515	yes
IGFN1	par72	vir_par72	OK	0.318315	1.29867	2.0285	4.0798	2.96761	5e-05	0.000280515	yes
SIAH2	par72	vir_par72	OK	20.7725	84.746	2.02847	4.07972	6.49446	5e-05	0.000280515	yes
SCFD1	par72	vir_par72	OK	34.5876	140.892	2.02627	4.0735	5.76944	5e-05	0.000280515	yes
RP11-804H8.6	par72	vir_par72	OK	1.0815	4.3975	2.02365	4.06611	2.70192	5e-05	0.000280515	yes
ARHGAP29	par72	vir_par72	OK	19.1718	77.7694	2.02021	4.05643	6.81196	5e-05	0.000280515	yes
SEC23B	par72	vir_par72	OK	97.8649	396.861	2.01977	4.05519	5.19129	5e-05	0.000280515	yes
KLHL29	par72	vir_par72	OK	1.00567	4.06917	2.01657	4.04621	4.57806	5e-05	0.000280515	yes
SLC2A3	par72	vir_par72	OK	25.6136	103.493	2.01456	4.04057	3.98319	5e-05	0.000280515	yes
EP400NL	par72	vir_par72	OK	1.49983	6.05234	2.01269	4.03534	3.36014	5e-05	0.000280515	yes
SEC61A2	par72	vir_par72	OK	3.33236	13.4322	2.01108	4.03084	1.1398	0.0001	0.000538822	yes
ZDHHC18	par72	vir_par72	OK	11.8312	47.4616	2.00416	4.01155	3.95636	5e-05	0.000280515	yes
MCL1	par72	vir_par72	OK	122.824	492.524	2.0036	4.00999	6.38217	5e-05	0.000280515	yes
ZNF527	par72	vir_par72	OK	7.70321	30.8885	2.00354	4.00983	3.6939	5e-05	0.000280515	yes
ICAM1	par72	vir_par72	OK	16.3894	65.6012	2.00096	4.00266	5.16651	5e-05	0.000280515	yes
HMGXB3	par72	vir_par72	OK	13.7088	54.835	2	4	3.55538	5e-05	0.000280515	yes
RP11-148B18.4	par72	vir_par72	OK	0.302418	1.20963	1.99995	3.99986	1.43022	0.00545	0.0201254	yes
NPIPB3	par72	vir_par72	OK	2.4246	9.69421	1.99938	3.99828	3.3734	5e-05	0.000280515	yes
PPP1R15B	par72	vir_par72	OK	50.6045	202.04	1.9973	3.99252	6.04688	5e-05	0.000280515	yes
SLC19A2	par72	vir_par72	OK	14.0003	55.8258	1.99547	3.98746	6.33085	5e-05	0.000280515	yes
C9orf72	par72	vir_par72	OK	15.4704	61.5645	1.99259	3.97951	5.83762	5e-05	0.000280515	yes
NFIL3	par72	vir_par72	OK	8.85935	35.2151	1.99092	3.9749	5.82568	5e-05	0.000280515	yes
MTF1	par72	vir_par72	OK	9.00466	35.736	1.98863	3.9686	6.4817	5e-05	0.000280515	yes
TIFA	par72	vir_par72	OK	7.9802	31.6697	1.98861	3.96854	3.12688	5e-05	0.000280515	yes
FJX1	par72	vir_par72	OK	0.766562	3.03785	1.98658	3.96296	3.13833	5e-05	0.000280515	yes
ZSWIM4	par72	vir_par72	OK	1.20691	4.77742	1.98492	3.95841	4.00935	5e-05	0.000280515	yes
NECAP1P1	par72	vir_par72	OK	0.593042	2.34612	1.98407	3.95608	2.5159	5e-05	0.000280515	yes
PNRC1	par72	vir_par72	OK	43.7147	172.629	1.98148	3.94898	5.54513	5e-05	0.000280515	yes
CIDECP	par72	vir_par72	OK	4.02174	15.8787	1.98121	3.94824	3.84834	5e-05	0.000280515	yes
TBC1D22B	par72	vir_par72	OK	12.4016	48.9406	1.9805	3.9463	6.31768	5e-05	0.000280515	yes
PRPF4	par72	vir_par72	OK	29.0947	114.742	1.97957	3.94376	4.63731	5e-05	0.000280515	yes
PTPN21	par72	vir_par72	OK	4.73368	18.6624	1.9791	3.94247	4.66513	5e-05	0.000280515	yes
ENTPD7	par72	vir_par72	OK	5.97707	23.5403	1.97762	3.93843	3.31476	5e-05	0.000280515	yes
IGFL4	par72	vir_par72	OK	2.89295	11.361	1.97347	3.92712	2.64583	5e-05	0.000280515	yes
C16orf72	par72	vir_par72	OK	10.659	41.8182	1.97206	3.92328	3.5511	5e-05	0.000280515	yes
POFUT2	par72	vir_par72	OK	16.4429	64.4263	1.97018	3.91817	3.29188	5e-05	0.000280515	yes
NFKBIZ	par72	vir_par72	OK	6.80525	26.6511	1.96947	3.91624	2.9371	5e-05	0.000280515	yes
RP11-1277A3.1	par72	vir_par72	OK	0.913109	3.57405	1.9687	3.91415	2.81172	5e-05	0.000280515	yes
MIR4458HG	par72	vir_par72	OK	8.57202	33.5369	1.96804	3.91236	4.42984	5e-05	0.000280515	yes
CCND2	par72	vir_par72	OK	0.56258	2.19869	1.96652	3.90824	2.55533	5e-05	0.000280515	yes
ZNF410	par72	vir_par72	OK	36.597	142.821	1.96441	3.90253	2.98566	5e-05	0.000280515	yes
NIFKP1	par72	vir_par72	OK	0.300737	1.17326	1.96395	3.90129	1.87206	0.0002	0.00102556	yes
GPR115	par72	vir_par72	OK	4.73616	18.4686	1.96328	3.89948	5.34454	5e-05	0.000280515	yes
NUS1P1	par72	vir_par72	OK	21.1962	82.6072	1.96246	3.89726	5.51889	5e-05	0.000280515	yes
ARHGAP10	par72	vir_par72	OK	5.13094	19.9959	1.9624	3.8971	4.49	5e-05	0.000280515	yes
ACBD3	par72	vir_par72	OK	25.7318	100.237	1.9618	3.89548	4.92594	5e-05	0.000280515	yes
IBTK	par72	vir_par72	OK	43.9132	170.995	1.96122	3.89391	6.65824	5e-05	0.000280515	yes
TUBA1A	par72	vir_par72	OK	10.8006	42.0277	1.96023	3.89124	1.98858	5e-05	0.000280515	yes
ABTB2	par72	vir_par72	OK	2.9474	11.4664	1.9599	3.89035	4.72746	5e-05	0.000280515	yes
SLC25A33	par72	vir_par72	OK	2.27129	8.83168	1.95918	3.88841	4.82954	5e-05	0.000280515	yes
FAM83G	par72	vir_par72	OK	8.78351	34.0085	1.95303	3.87187	5.89665	5e-05	0.000280515	yes
C12orf44	par72	vir_par72	OK	14.8018	57.2962	1.95266	3.87088	5.10453	5e-05	0.000280515	yes
RP11-114H23.1	par72	vir_par72	OK	0.357171	1.38231	1.95239	3.87015	1.91006	0.0002	0.00102556	yes
DUSP2	par72	vir_par72	OK	3.31707	12.8352	1.95213	3.86945	3.68806	5e-05	0.000280515	yes
PLAUR	par72	vir_par72	OK	6.70722	25.8734	1.94768	3.85754	4.40812	5e-05	0.000280515	yes
AC005224.2	par72	vir_par72	OK	0.291484	1.123	1.94587	3.8527	2.37935	5e-05	0.000280515	yes
CITED2	par72	vir_par72	OK	6.19525	23.8472	1.94459	3.84928	4.9252	5e-05	0.000280515	yes
PPP3CC	par72	vir_par72	OK	7.77327	29.8867	1.94291	3.8448	2.71488	5e-05	0.000280515	yes
CHD2	par72	vir_par72	OK	62.2412	239.274	1.94272	3.8443	1.89448	5e-05	0.000280515	yes
RAB32	par72	vir_par72	OK	8.64451	33.1982	1.94125	3.84038	5.07407	5e-05	0.000280515	yes
ZNF670	par72	vir_par72	OK	3.70438	14.1995	1.93854	3.83318	3.96152	5e-05	0.000280515	yes
CHAC2	par72	vir_par72	OK	6.38052	24.4402	1.93751	3.83044	1.59134	0.0002	0.00102556	yes
ADIPOR2	par72	vir_par72	OK	76.216	291.602	1.93583	3.82598	5.87056	5e-05	0.000280515	yes
EFNA1	par72	vir_par72	OK	14.9909	57.3539	1.9358	3.8259	5.37884	5e-05	0.000280515	yes
FKBP14	par72	vir_par72	OK	22.9172	87.5789	1.93415	3.82153	2.11038	5e-05	0.000280515	yes
BIRC2	par72	vir_par72	OK	22.3951	85.5824	1.93413	3.82148	5.19781	5e-05	0.000280515	yes
PPAP2B	par72	vir_par72	OK	6.51362	24.8746	1.93314	3.81885	3.251	5e-05	0.000280515	yes
ELF3	par72	vir_par72	OK	60.7931	232.115	1.93286	3.81811	4.25559	5e-05	0.000280515	yes
CWC25	par72	vir_par72	OK	7.94414	30.3309	1.93282	3.81801	4.79904	5e-05	0.000280515	yes
CPEB2	par72	vir_par72	OK	0.720879	2.75097	1.93211	3.81613	2.35663	5e-05	0.000280515	yes
GMPPA	par72	vir_par72	OK	49.074	187.253	1.93196	3.81573	5.62358	5e-05	0.000280515	yes
COQ10A	par72	vir_par72	OK	4.0721	15.5118	1.92952	3.80928	3.38997	5e-05	0.000280515	yes
ANKHD1-EIF4EBP3	par72	vir_par72	OK	9.03461	34.3932	1.92859	3.80683	1.45997	0.00085	0.0038374	yes
CHRNA10	par72	vir_par72	OK	0.297252	1.13093	1.92775	3.80461	0.239474	0.00735	0.0261384	yes
GLRX3	par72	vir_par72	OK	24.9243	94.7618	1.92675	3.80198	5.14794	5e-05	0.000280515	yes
PIGA	par72	vir_par72	OK	9.86569	37.4813	1.92568	3.79916	1.95116	5e-05	0.000280515	yes
TNKS2	par72	vir_par72	OK	31.8456	120.985	1.92567	3.79913	6.27615	5e-05	0.000280515	yes
GCLM	par72	vir_par72	OK	8.38971	31.8312	1.92375	3.79408	5.52922	5e-05	0.000280515	yes
CCDC9	par72	vir_par72	OK	15.048	57.056	1.9228	3.79158	2.79489	5e-05	0.000280515	yes
MTRF1L	par72	vir_par72	OK	2.50614	9.48649	1.92041	3.78531	3.3918	5e-05	0.000280515	yes
IQCJ-SCHIP1	par72	vir_par72	OK	0.378738	1.43062	1.91737	3.77734	1.33656	5e-05	0.000280515	yes
PMAIP1	par72	vir_par72	OK	19.9852	75.4775	1.91711	3.77666	5.93014	5e-05	0.000280515	yes
XBP1	par72	vir_par72	OK	165.182	623.143	1.91551	3.77247	6.51848	5e-05	0.000280515	yes
GOLGA5	par72	vir_par72	OK	19.4867	73.3057	1.91143	3.76182	6.36813	5e-05	0.000280515	yes
ZBTB5	par72	vir_par72	OK	13.738	51.6603	1.91088	3.76038	6.37368	5e-05	0.000280515	yes
OSR2	par72	vir_par72	OK	0.476029	1.78946	1.9104	3.75913	1.94923	5e-05	0.000280515	yes
NRBF2P3	par72	vir_par72	OK	0.500732	1.88058	1.90906	3.75564	2.32807	5e-05	0.000280515	yes
RP11-389K14.3	par72	vir_par72	OK	4.99279	18.7404	1.90824	3.75351	3.96791	5e-05	0.000280515	yes
NRARP	par72	vir_par72	OK	16.7957	63.0274	1.90789	3.7526	6.05304	5e-05	0.000280515	yes
SH3RF1	par72	vir_par72	OK	14.956	56.0496	1.90598	3.74763	6.45222	5e-05	0.000280515	yes
ZNF555	par72	vir_par72	OK	3.47902	13.0237	1.90438	3.74348	4.33776	5e-05	0.000280515	yes
RLF	par72	vir_par72	OK	10.1851	38.1071	1.90359	3.74143	6.38419	5e-05	0.000280515	yes
CCNJ	par72	vir_par72	OK	5.42516	20.2955	1.90342	3.74099	4.48256	5e-05	0.000280515	yes
PPP1R13B	par72	vir_par72	OK	5.59126	20.909	1.90288	3.73959	3.4046	5e-05	0.000280515	yes
NFKB1	par72	vir_par72	OK	12.7081	47.4906	1.90189	3.73702	3.70718	5e-05	0.000280515	yes
ADAM32	par72	vir_par72	OK	0.705712	2.63598	1.90119	3.73521	1.90647	5e-05	0.000280515	yes
LRIF1	par72	vir_par72	OK	18.1353	67.7281	1.90095	3.73459	5.77471	5e-05	0.000280515	yes
BNIP1	par72	vir_par72	OK	25.3608	94.6522	1.90003	3.73221	5.68773	5e-05	0.000280515	yes
UTP6	par72	vir_par72	OK	28.5673	106.608	1.89988	3.73182	4.23045	5e-05	0.000280515	yes
PIK3C3	par72	vir_par72	OK	24.874	92.7821	1.89921	3.73009	0.863082	5e-05	0.000280515	yes
KIAA0226	par72	vir_par72	OK	7.79758	29.0822	1.89904	3.72965	2.61682	5e-05	0.000280515	yes
ZNF14	par72	vir_par72	OK	3.06145	11.4172	1.89891	3.72931	4.87203	5e-05	0.000280515	yes
CDC25A	par72	vir_par72	OK	5.9878	22.3146	1.89789	3.72668	4.89852	5e-05	0.000280515	yes
CDKL1	par72	vir_par72	OK	5.11637	19.0557	1.89703	3.72446	0.796455	0.0017	0.00716419	yes
NPIPB5	par72	vir_par72	OK	1.63985	6.09904	1.89502	3.71927	1.46414	5e-05	0.000280515	yes
IL4R	par72	vir_par72	OK	7.99125	29.7189	1.89489	3.71894	3.32521	5e-05	0.000280515	yes
HIST1H2BN	par72	vir_par72	OK	3.42544	12.7387	1.89485	3.71883	2.76429	5e-05	0.000280515	yes
KLHL21	par72	vir_par72	OK	6.35021	23.6103	1.89454	3.71803	2.94784	5e-05	0.000280515	yes
THAP1	par72	vir_par72	OK	12.5899	46.7996	1.89423	3.71724	5.56491	5e-05	0.000280515	yes
SLC25A32	par72	vir_par72	OK	17.5518	65.15	1.89215	3.71188	4.35209	5e-05	0.000280515	yes
DNAJC12	par72	vir_par72	OK	0.348588	1.29389	1.89212	3.7118	1.6611	0.0001	0.000538822	yes
RP11-22P4.1	par72	vir_par72	OK	0.289107	1.07304	1.89203	3.71157	1.34943	0.0044	0.016667	yes
KCNK5	par72	vir_par72	OK	5.92573	21.9865	1.89156	3.71036	5.51156	5e-05	0.000280515	yes
YOD1	par72	vir_par72	OK	13.9342	51.6979	1.89148	3.71016	3.67524	5e-05	0.000280515	yes
SNX11	par72	vir_par72	OK	20.807	77.1835	1.89122	3.70949	4.9063	5e-05	0.000280515	yes
ZNF473	par72	vir_par72	OK	9.44869	35.0376	1.89072	3.7082	4.19101	5e-05	0.000280515	yes
C1orf52	par72	vir_par72	OK	8.92524	33.0064	1.88678	3.69809	4.69099	5e-05	0.000280515	yes
JUN	par72	vir_par72	OK	14.559	53.7987	1.88566	3.69522	5.88977	5e-05	0.000280515	yes
CCNL1	par72	vir_par72	OK	23.7782	87.8574	1.88553	3.69489	4.7045	5e-05	0.000280515	yes
ZNF562	par72	vir_par72	OK	31.1119	114.821	1.88385	3.69059	3.50314	5e-05	0.000280515	yes
CTA-217C2.1	par72	vir_par72	OK	11.1098	41.0011	1.88383	3.69054	4.67791	5e-05	0.000280515	yes
NTMT1	par72	vir_par72	OK	14.1319	52.1491	1.88369	3.69018	4.24396	5e-05	0.000280515	yes
DAPK3	par72	vir_par72	OK	5.97063	21.9543	1.87855	3.67705	3.69895	5e-05	0.000280515	yes
SS18L2	par72	vir_par72	OK	18.2978	67.1881	1.87653	3.67191	1.89324	0.00015	0.000786087	yes
NEDD4L	par72	vir_par72	OK	77.7258	285.391	1.87648	3.67178	1.44954	5e-05	0.000280515	yes
CBWD5	par72	vir_par72	OK	23.46	86.1043	1.87588	3.67025	4.69425	5e-05	0.000280515	yes
ALYREF	par72	vir_par72	OK	15.995	58.6887	1.87546	3.66919	1.66897	5e-05	0.000280515	yes
BMP2	par72	vir_par72	OK	0.660708	2.42382	1.8752	3.66852	3.60418	5e-05	0.000280515	yes
RP11-213H15.4	par72	vir_par72	OK	2.31127	8.47237	1.87408	3.66568	1.57694	0.00055	0.00258647	yes
C2orf42	par72	vir_par72	OK	11.4367	41.8864	1.87281	3.66245	2.21667	5e-05	0.000280515	yes
FKBP11	par72	vir_par72	OK	14.6723	53.7055	1.87198	3.66035	1.18136	5e-05	0.000280515	yes
THAP9-AS1	par72	vir_par72	OK	63.0286	230.692	1.87189	3.66012	3.00699	5e-05	0.000280515	yes
ISL2	par72	vir_par72	OK	0.87027	3.18332	1.87099	3.65784	3.0344	5e-05	0.000280515	yes
CDC6	par72	vir_par72	OK	11.7332	42.9021	1.87045	3.65647	5.1586	5e-05	0.000280515	yes
PCSK5	par72	vir_par72	OK	0.286184	1.04364	1.86661	3.64675	2.11502	5e-05	0.000280515	yes
PLAU	par72	vir_par72	OK	1.63686	5.96539	1.86569	3.64442	3.17985	5e-05	0.000280515	yes
ST7	par72	vir_par72	OK	14.89	54.1873	1.86361	3.63917	3.76952	5e-05	0.000280515	yes
FBXO30	par72	vir_par72	OK	7.27821	26.4736	1.8629	3.63738	6.103	5e-05	0.000280515	yes
LINC00843	par72	vir_par72	OK	2.05761	7.48014	1.8621	3.63536	1.39595	0.00705	0.0252011	yes
ZSCAN21	par72	vir_par72	OK	8.60618	31.2564	1.86071	3.63186	2.71972	5e-05	0.000280515	yes
ADRB1	par72	vir_par72	OK	2.11399	7.66862	1.859	3.62756	4.15345	5e-05	0.000280515	yes
C19orf44	par72	vir_par72	OK	2.21376	8.02955	1.85882	3.62711	0.905746	0.0074	0.0262915	yes
MPP3	par72	vir_par72	OK	2.75653	9.98555	1.85699	3.62251	2.70917	5e-05	0.000280515	yes
CLP1	par72	vir_par72	OK	22.7705	82.3777	1.85509	3.61774	4.14879	5e-05	0.000280515	yes
ZNF184	par72	vir_par72	OK	9.29118	33.6029	1.85465	3.61664	5.6557	5e-05	0.000280515	yes
ANKHD1,ANKHD1-EIF4EBP3	par72	vir_par72	OK	60.3141	218.037	1.85401	3.61504	3.23799	5e-05	0.000280515	yes
ZNF79	par72	vir_par72	OK	2.58014	9.31955	1.85281	3.61203	4.3312	5e-05	0.000280515	yes
TIMM10B	par72	vir_par72	OK	25.906	93.51	1.85183	3.60958	5.22241	5e-05	0.000280515	yes
EGR3	par72	vir_par72	OK	6.71227	24.2214	1.85141	3.60853	1.28986	0.00175	0.00735233	yes
TXNRD1	par72	vir_par72	OK	212.569	765.731	1.84891	3.60228	2.44594	5e-05	0.000280515	yes
ARL4D	par72	vir_par72	OK	4.04617	14.5739	1.84876	3.6019	4.17218	5e-05	0.000280515	yes
PNO1	par72	vir_par72	OK	17.4252	62.7478	1.84839	3.60098	3.16635	5e-05	0.000280515	yes
PSPC1	par72	vir_par72	OK	33.9832	122.281	1.84731	3.59829	4.15943	5e-05	0.000280515	yes
MIOS	par72	vir_par72	OK	17.6643	63.5246	1.84648	3.59622	3.96016	5e-05	0.000280515	yes
EIF2S1	par72	vir_par72	OK	139.136	499.099	1.84283	3.58713	3.04867	5e-05	0.000280515	yes
SRPRB	par72	vir_par72	OK	50.1712	179.789	1.84137	3.5835	5.15445	5e-05	0.000280515	yes
LITAF	par72	vir_par72	OK	62.3209	222.89	1.83854	3.57648	3.66144	5e-05	0.000280515	yes
TNFSF9	par72	vir_par72	OK	5.38888	19.2618	1.83769	3.57437	4.25658	5e-05	0.000280515	yes
BTBD10	par72	vir_par72	OK	14.3962	51.4509	1.83751	3.57393	5.41641	5e-05	0.000280515	yes
SLC25A13	par72	vir_par72	OK	14.7912	52.8407	1.83691	3.57244	4.34711	5e-05	0.000280515	yes
AC025335.1	par72	vir_par72	OK	7.3952	26.4176	1.83684	3.57227	5.11513	5e-05	0.000280515	yes
CNOT4	par72	vir_par72	OK	11.9891	42.7993	1.83587	3.56987	5.25876	5e-05	0.000280515	yes
ZNF77	par72	vir_par72	OK	6.26043	22.3343	1.83493	3.56754	4.81649	5e-05	0.000280515	yes
EPT1	par72	vir_par72	OK	33.9359	121.024	1.83441	3.56626	4.01115	5e-05	0.000280515	yes
DCUN1D2	par72	vir_par72	OK	19.1534	68.2003	1.83217	3.56072	3.71705	5e-05	0.000280515	yes
KCTD20	par72	vir_par72	OK	33.5456	119.348	1.83098	3.55779	5.38809	5e-05	0.000280515	yes
RP3-406P24.1	par72	vir_par72	OK	19.7265	70.0996	1.82927	3.55357	5.07864	5e-05	0.000280515	yes
PI4KAP2	par72	vir_par72	OK	0.752647	2.67449	1.82922	3.55345	2.16174	5e-05	0.000280515	yes
CLU	par72	vir_par72	OK	64.8646	230.482	1.82915	3.55328	3.81231	5e-05	0.000280515	yes
NANS	par72	vir_par72	OK	23.8069	84.4726	1.8271	3.54823	4.31822	5e-05	0.000280515	yes
PRPF38AP1	par72	vir_par72	OK	0.712551	2.52492	1.82517	3.54349	2.68639	5e-05	0.000280515	yes
ZNF844	par72	vir_par72	OK	0.632921	2.24171	1.8245	3.54184	3.38951	5e-05	0.000280515	yes
ZNF416	par72	vir_par72	OK	4.5324	16.035	1.82287	3.53784	4.79191	5e-05	0.000280515	yes
BTAF1	par72	vir_par72	OK	21.4524	75.7854	1.82078	3.53272	5.05141	5e-05	0.000280515	yes
PRKCE	par72	vir_par72	OK	2.31783	8.17005	1.81757	3.52487	2.67321	5e-05	0.000280515	yes
GNPDA1	par72	vir_par72	OK	136.515	481.141	1.81739	3.52443	4.61021	5e-05	0.000280515	yes
RCAN1	par72	vir_par72	OK	8.2047	28.8899	1.81604	3.52113	5.09966	5e-05	0.000280515	yes
PELO	par72	vir_par72	OK	5.54587	19.5168	1.81523	3.51916	1.55894	0.0013	0.00562895	yes
ZNF543	par72	vir_par72	OK	4.06898	14.3112	1.81441	3.51716	5.04458	5e-05	0.000280515	yes
FOXA3	par72	vir_par72	OK	11.0927	38.9906	1.81351	3.51496	5.28407	5e-05	0.000280515	yes
FLNC	par72	vir_par72	OK	7.44619	26.1689	1.81328	3.5144	4.34668	5e-05	0.000280515	yes
WNK4	par72	vir_par72	OK	1.15293	4.05129	1.81308	3.51392	1.58155	5e-05	0.000280515	yes
PANX2	par72	vir_par72	OK	1.01537	3.56675	1.8126	3.51275	3.3272	5e-05	0.000280515	yes
TEX30	par72	vir_par72	OK	23.8336	83.6378	1.81116	3.50924	5.17013	5e-05	0.000280515	yes
TMEM55B	par72	vir_par72	OK	21.6465	75.8325	1.80868	3.50322	2.02443	5e-05	0.000280515	yes
CSRNP2	par72	vir_par72	OK	12.4363	43.4636	1.80525	3.4949	4.27545	5e-05	0.000280515	yes
TBL2	par72	vir_par72	OK	24.4767	85.4977	1.80448	3.49303	4.735	5e-05	0.000280515	yes
SEC11C	par72	vir_par72	OK	35.3212	123.341	1.80405	3.49199	4.98623	5e-05	0.000280515	yes
CAPN10-AS1	par72	vir_par72	OK	0.455379	1.59009	1.80397	3.4918	3.24743	5e-05	0.000280515	yes
MCTP2	par72	vir_par72	OK	7.78612	27.1529	1.80213	3.48735	3.83816	5e-05	0.000280515	yes
RP11-641A6.9	par72	vir_par72	OK	0.451731	1.57466	1.8015	3.48582	2.5009	5e-05	0.000280515	yes
MAP4K5	par72	vir_par72	OK	16.6885	58.1308	1.80045	3.48329	2.63282	5e-05	0.000280515	yes
KIAA0513	par72	vir_par72	OK	4.98782	17.3603	1.79931	3.48054	3.76318	5e-05	0.000280515	yes
RP11-546B8.3	par72	vir_par72	OK	0.940054	3.27006	1.7985	3.47858	1.23994	0.0104	0.0352909	yes
TMEM183A	par72	vir_par72	OK	7.1941	24.9948	1.79674	3.47434	3.61815	5e-05	0.000280515	yes
DNTTIP2	par72	vir_par72	OK	40.5916	140.937	1.7958	3.47208	3.29102	5e-05	0.000280515	yes
P2RX4	par72	vir_par72	OK	16.3998	56.9361	1.79567	3.47177	4.70179	5e-05	0.000280515	yes
NMT2	par72	vir_par72	OK	12.4242	43.0535	1.79298	3.4653	3.90284	5e-05	0.000280515	yes
DIABLO	par72	vir_par72	OK	64.8096	224.009	1.78928	3.45642	3.75809	5e-05	0.000280515	yes
LRP8	par72	vir_par72	OK	7.50809	25.9248	1.78781	3.4529	3.67093	5e-05	0.000280515	yes
RELL1	par72	vir_par72	OK	5.35836	18.4741	1.78564	3.44771	3.1686	5e-05	0.000280515	yes
CTNNAL1	par72	vir_par72	OK	45.1076	155.492	1.7854	3.44714	5.7491	5e-05	0.000280515	yes
RIOK3	par72	vir_par72	OK	50.6937	174.659	1.78466	3.44537	5.07062	5e-05	0.000280515	yes
AKAP8	par72	vir_par72	OK	5.2563	18.0838	1.78258	3.44041	2.68614	5e-05	0.000280515	yes
RP11-231C14.4	par72	vir_par72	OK	1.00357	3.45223	1.78239	3.43996	2.00985	5e-05	0.000280515	yes
SLTM	par72	vir_par72	OK	47.0356	161.588	1.7805	3.43545	3.02231	5e-05	0.000280515	yes
RP11-37B2.1	par72	vir_par72	OK	3.0722	10.5512	1.78007	3.43443	2.82675	5e-05	0.000280515	yes
LIN37	par72	vir_par72	OK	12.2562	41.97	1.77585	3.4244	2.60793	5e-05	0.000280515	yes
NRBF2P4	par72	vir_par72	OK	0.521905	1.7862	1.77504	3.42247	2.19933	5e-05	0.000280515	yes
F2RL1	par72	vir_par72	OK	40.9162	140.01	1.77479	3.42188	4.82535	5e-05	0.000280515	yes
GADD45B	par72	vir_par72	OK	53.5421	183.16	1.77436	3.42086	3.79938	5e-05	0.000280515	yes
RP11-347C12.1	par72	vir_par72	OK	0.707166	2.41339	1.77094	3.41276	2.35415	5e-05	0.000280515	yes
CBWD2	par72	vir_par72	OK	9.66211	32.9714	1.77081	3.41245	3.55189	5e-05	0.000280515	yes
RAPGEF2	par72	vir_par72	OK	30.8247	105.062	1.76909	3.40839	3.15745	5e-05	0.000280515	yes
RP11-544M22.13	par72	vir_par72	OK	12.6878	43.1726	1.76667	3.40268	1.3768	0.00235	0.00956308	yes
RAB12	par72	vir_par72	OK	11.6452	39.6201	1.7665	3.40228	4.43041	5e-05	0.000280515	yes
WWC2	par72	vir_par72	OK	5.92893	20.1612	1.76574	3.40048	4.37942	5e-05	0.000280515	yes
RP11-756P10.3	par72	vir_par72	OK	5.54157	18.8439	1.76573	3.40046	4.03299	5e-05	0.000280515	yes
R3HDM4	par72	vir_par72	OK	16.7776	57.0476	1.76563	3.40022	4.63922	5e-05	0.000280515	yes
RHOV	par72	vir_par72	OK	3.4117	11.5996	1.76551	3.39994	4.01716	5e-05	0.000280515	yes
PSMD11	par72	vir_par72	OK	42.8961	145.697	1.76405	3.3965	4.99539	5e-05	0.000280515	yes
DYRK3	par72	vir_par72	OK	4.39596	14.9062	1.76167	3.3909	4.39515	5e-05	0.000280515	yes
ZNF674-AS1	par72	vir_par72	OK	4.06372	13.7701	1.76067	3.38855	4.0422	5e-05	0.000280515	yes
RIOK1	par72	vir_par72	OK	13.1404	44.4978	1.75973	3.38635	1.70022	0.0001	0.000538822	yes
FBXO42	par72	vir_par72	OK	10.2955	34.8613	1.75961	3.38607	3.58777	5e-05	0.000280515	yes
ATG16L1	par72	vir_par72	OK	10.3328	34.9844	1.75948	3.38576	4.77362	5e-05	0.000280515	yes
PARD6B	par72	vir_par72	OK	28.4083	96.1146	1.75844	3.38332	6.07855	5e-05	0.000280515	yes
SRP72	par72	vir_par72	OK	106.502	360.298	1.7583	3.38299	4.72665	5e-05	0.000280515	yes
VCP	par72	vir_par72	OK	94.7272	319.861	1.75559	3.37664	5.32265	5e-05	0.000280515	yes
ZNF699	par72	vir_par72	OK	8.89305	30.0168	1.75502	3.37531	4.53421	5e-05	0.000280515	yes
SOX30	par72	vir_par72	OK	0.428658	1.44628	1.75445	3.37398	2.39505	5e-05	0.000280515	yes
RIPK2	par72	vir_par72	OK	5.13936	17.3356	1.75408	3.37311	4.38061	5e-05	0.000280515	yes
TSC22D3	par72	vir_par72	OK	32.0431	108.059	1.75373	3.37229	5.84304	5e-05	0.000280515	yes
TMEM241	par72	vir_par72	OK	20.7813	70.0708	1.75353	3.37183	3.13488	5e-05	0.000280515	yes
RP11-49C24.1	par72	vir_par72	OK	1.81516	6.11968	1.75336	3.37143	2.02392	5e-05	0.000280515	yes
MRPS2	par72	vir_par72	OK	12.0973	40.7726	1.75291	3.37038	4.33458	5e-05	0.000280515	yes
OSTM1	par72	vir_par72	OK	30.4249	102.454	1.75165	3.36743	3.88586	5e-05	0.000280515	yes
GOLT1B	par72	vir_par72	OK	59.731	201.052	1.75101	3.36594	4.49149	5e-05	0.000280515	yes
PRSS22	par72	vir_par72	OK	4.66571	15.6997	1.75057	3.36491	2.84742	5e-05	0.000280515	yes
SNRPG	par72	vir_par72	OK	61.477	206.747	1.74975	3.363	4.64924	5e-05	0.000280515	yes
JPH1	par72	vir_par72	OK	5.84191	19.6411	1.74936	3.36209	4.83321	5e-05	0.000280515	yes
SDC4	par72	vir_par72	OK	81.7735	274.754	1.74844	3.35995	6.16718	5e-05	0.000280515	yes
DCUN1D5	par72	vir_par72	OK	33.69	113.179	1.74821	3.35941	4.77223	5e-05	0.000280515	yes
ZNF383	par72	vir_par72	OK	7.78419	26.1423	1.74777	3.35839	1.87694	5e-05	0.000280515	yes
ARFGAP3	par72	vir_par72	OK	23.065	77.4594	1.74773	3.3583	2.93794	5e-05	0.000280515	yes
PLD6	par72	vir_par72	OK	5.81017	19.4961	1.74653	3.35551	1.41924	0.0038	0.0146441	yes
SLC7A11	par72	vir_par72	OK	74.7801	250.919	1.7465	3.35544	3.56913	5e-05	0.000280515	yes
FNIP1	par72	vir_par72	OK	13.7891	46.2542	1.74605	3.35439	4.49878	5e-05	0.000280515	yes
NTN4	par72	vir_par72	OK	3.34467	11.2189	1.74599	3.35425	3.93001	5e-05	0.000280515	yes
KIAA0907	par72	vir_par72	OK	19.2851	64.6437	1.74502	3.352	4.46957	5e-05	0.000280515	yes
ELL2	par72	vir_par72	OK	3.90652	13.0878	1.74426	3.35023	1.092	0.0015	0.00640294	yes
SNAPC1	par72	vir_par72	OK	9.09919	30.4648	1.74333	3.34807	2.51204	5e-05	0.000280515	yes
TES	par72	vir_par72	OK	75.914	254.119	1.74306	3.34744	5.49068	5e-05	0.000280515	yes
C12orf49	par72	vir_par72	OK	27.2441	91.1063	1.74161	3.34408	5.79434	5e-05	0.000280515	yes
SOGA2	par72	vir_par72	OK	0.959634	3.20832	1.74126	3.34327	1.63983	5e-05	0.000280515	yes
C18orf8	par72	vir_par72	OK	8.4957	28.3941	1.74079	3.34218	1.62115	5e-05	0.000280515	yes
TPST1	par72	vir_par72	OK	8.55853	28.6012	1.74064	3.34183	2.9286	5e-05	0.000280515	yes
GS1-309P15.4	par72	vir_par72	OK	0.533845	1.7794	1.7369	3.33318	2.71944	5e-05	0.000280515	yes
CSGALNACT2	par72	vir_par72	OK	11.8245	39.4003	1.73642	3.33207	4.90683	5e-05	0.000280515	yes
CEP85	par72	vir_par72	OK	13.6236	45.3921	1.73633	3.33187	4.61834	5e-05	0.000280515	yes
SYNJ1	par72	vir_par72	OK	3.15451	10.4994	1.73481	3.32836	3.59921	5e-05	0.000280515	yes
RP11-23F23.3	par72	vir_par72	OK	0.909268	3.02584	1.73456	3.32778	3.09647	5e-05	0.000280515	yes
USP12	par72	vir_par72	OK	29.7233	98.884	1.73414	3.32681	6.02669	5e-05	0.000280515	yes
MAPK6PS4	par72	vir_par72	OK	0.580767	1.92764	1.7308	3.31912	2.86243	5e-05	0.000280515	yes
RP11-438L19.1	par72	vir_par72	OK	0.332458	1.10243	1.72945	3.31601	1.6911	0.0007	0.00321832	yes
SEC14L2	par72	vir_par72	OK	5.21526	17.2922	1.72931	3.31569	1.47297	0.00015	0.000786087	yes
CLK4	par72	vir_par72	OK	14.6122	48.4307	1.72875	3.31441	4.43899	5e-05	0.000280515	yes
SRSF3	par72	vir_par72	OK	217.163	719.529	1.72827	3.3133	5.18048	5e-05	0.000280515	yes
KDM5B	par72	vir_par72	OK	11.1002	36.7591	1.72751	3.31156	4.72315	5e-05	0.000280515	yes
ARL14	par72	vir_par72	OK	2.43077	8.04686	1.72701	3.31041	3.46198	5e-05	0.000280515	yes
ABHD3	par72	vir_par72	OK	24.6018	81.3834	1.72597	3.30802	4.67058	5e-05	0.000280515	yes
ZNF239	par72	vir_par72	OK	14.8001	48.9579	1.72593	3.30793	4.1108	5e-05	0.000280515	yes
SLC25A42	par72	vir_par72	OK	2.41351	7.97776	1.72485	3.30546	2.1863	5e-05	0.000280515	yes
PCF11	par72	vir_par72	OK	16.7158	55.2276	1.72418	3.30392	4.60357	5e-05	0.000280515	yes
RRN3P1	par72	vir_par72	OK	3.12461	10.3217	1.72393	3.30335	3.15062	5e-05	0.000280515	yes
MFSD9	par72	vir_par72	OK	11.7685	38.8681	1.72366	3.30273	3.08707	5e-05	0.000280515	yes
ATF7IP2	par72	vir_par72	OK	13.7997	45.5434	1.7226	3.30031	2.93464	5e-05	0.000280515	yes
TBCCD1	par72	vir_par72	OK	7.50385	24.7431	1.72132	3.29738	2.01679	5e-05	0.000280515	yes
RP11-21L23.2	par72	vir_par72	OK	2.4705	8.14581	1.72125	3.29722	4.24401	5e-05	0.000280515	yes
NOP2	par72	vir_par72	OK	34.4649	113.581	1.72052	3.29555	3.83389	5e-05	0.000280515	yes
NAMPTL	par72	vir_par72	OK	76.6252	252.357	1.71958	3.29341	4.33594	5e-05	0.000280515	yes
ARHGAP23	par72	vir_par72	OK	6.14868	20.2438	1.71913	3.29238	2.24967	5e-05	0.000280515	yes
CC2D1B	par72	vir_par72	OK	4.2263	13.8879	1.71636	3.28606	0.752456	0.0001	0.000538822	yes
BTN2A3P	par72	vir_par72	OK	2.27815	7.48089	1.71535	3.28376	3.44902	5e-05	0.000280515	yes
HSPH1	par72	vir_par72	OK	55.2226	181.305	1.71509	3.28317	4.29085	5e-05	0.000280515	yes
PITHD1	par72	vir_par72	OK	18.6901	61.3453	1.71468	3.28224	4.9635	5e-05	0.000280515	yes
PINX1	par72	vir_par72	OK	15.707	51.5484	1.71452	3.28187	3.8481	5e-05	0.000280515	yes
TAF4B	par72	vir_par72	OK	5.71564	18.7569	1.71443	3.28167	4.91772	5e-05	0.000280515	yes
BYSL	par72	vir_par72	OK	12.1979	39.9875	1.71292	3.27824	4.88467	5e-05	0.000280515	yes
GEMIN8P4	par72	vir_par72	OK	0.536384	1.7571	1.71185	3.27581	1.84372	5e-05	0.000280515	yes
ZRANB1	par72	vir_par72	OK	17.4328	57.098	1.71164	3.27533	4.04154	5e-05	0.000280515	yes
ERLEC1	par72	vir_par72	OK	40.7911	133.559	1.71116	3.27424	4.90587	5e-05	0.000280515	yes
MAP2K3	par72	vir_par72	OK	8.39982	27.4376	1.70772	3.26644	4.04455	5e-05	0.000280515	yes
FAM118B	par72	vir_par72	OK	29.8135	97.2967	1.70642	3.2635	1.51908	0.00035	0.0017153	yes
IZUMO1	par72	vir_par72	OK	2.34519	7.65236	1.7062	3.263	2.47167	5e-05	0.000280515	yes
AP5Z1	par72	vir_par72	OK	2.21849	7.22736	1.70389	3.25778	3.08348	5e-05	0.000280515	yes
CLDND1	par72	vir_par72	OK	74.0832	241.309	1.70367	3.25729	3.85367	5e-05	0.000280515	yes
SDHAP1	par72	vir_par72	OK	2.77814	9.04762	1.70342	3.25672	2.44758	5e-05	0.000280515	yes
AARSD1	par72	vir_par72	OK	24.2345	78.8998	1.70296	3.25568	3.92335	5e-05	0.000280515	yes
GRPEL1	par72	vir_par72	OK	34.2023	111.29	1.70215	3.25386	5.03527	5e-05	0.000280515	yes
MAP7D1	par72	vir_par72	OK	9.89497	32.1947	1.70206	3.25365	2.82266	5e-05	0.000280515	yes
TSPAN13	par72	vir_par72	OK	60.1057	195.52	1.70174	3.25293	5.85278	5e-05	0.000280515	yes
ZNF561	par72	vir_par72	OK	45.0709	146.598	1.7016	3.25261	2.93254	5e-05	0.000280515	yes
BET1	par72	vir_par72	OK	41.3432	134.37	1.70049	3.25011	5.04476	5e-05	0.000280515	yes
RP11-24B19.3	par72	vir_par72	OK	8.52047	27.6773	1.6997	3.24833	1.07965	0.01045	0.0354386	yes
CYLD	par72	vir_par72	OK	13.6069	44.1591	1.69838	3.24536	3.49535	5e-05	0.000280515	yes
LATS2	par72	vir_par72	OK	13.0591	42.3701	1.69799	3.24449	5.75487	5e-05	0.000280515	yes
KLF4	par72	vir_par72	OK	10.5893	34.3561	1.69797	3.24444	5.09951	5e-05	0.000280515	yes
BCAR1	par72	vir_par72	OK	3.75293	12.1663	1.6968	3.24181	2.96019	5e-05	0.000280515	yes
NFX1	par72	vir_par72	OK	24.4588	79.2424	1.69592	3.23983	5.69911	5e-05	0.000280515	yes
MITF	par72	vir_par72	OK	3.17132	10.2731	1.69572	3.23939	2.87392	5e-05	0.000280515	yes
ARHGAP17	par72	vir_par72	OK	13.9867	45.2876	1.69506	3.2379	3.60503	5e-05	0.000280515	yes
SLC35A2	par72	vir_par72	OK	33.2697	107.651	1.69408	3.2357	5.30132	5e-05	0.000280515	yes
TJAP1	par72	vir_par72	OK	10.4357	33.6995	1.6912	3.22925	3.89054	5e-05	0.000280515	yes
ARID4A	par72	vir_par72	OK	5.17632	16.647	1.68527	3.21601	2.53569	5e-05	0.000280515	yes
USP12PX	par72	vir_par72	OK	3.72626	11.9755	1.68428	3.2138	3.46433	5e-05	0.000280515	yes
GTF2E1	par72	vir_par72	OK	15.4517	49.6547	1.68417	3.21355	2.41612	5e-05	0.000280515	yes
MIR31HG	par72	vir_par72	OK	0.554423	1.77922	1.68219	3.20915	1.94102	5e-05	0.000280515	yes
USP12PY	par72	vir_par72	OK	1.1707	3.7556	1.68167	3.20799	2.65443	5e-05	0.000280515	yes
PDRG1	par72	vir_par72	OK	19.4267	62.2628	1.68033	3.20501	5.13448	5e-05	0.000280515	yes
IFITM10	par72	vir_par72	OK	0.817704	2.61445	1.67686	3.19731	1.31826	0.00065	0.00300853	yes
CCDC117	par72	vir_par72	OK	15.3124	48.9572	1.67682	3.19722	5.3267	5e-05	0.000280515	yes
C2orf49	par72	vir_par72	OK	14.2697	45.5382	1.67413	3.19127	4.19476	5e-05	0.000280515	yes
FNDC3B	par72	vir_par72	OK	35.2793	112.572	1.67396	3.19089	2.80633	5e-05	0.000280515	yes
ARRDC2	par72	vir_par72	OK	7.97045	25.4319	1.67391	3.19078	3.74804	5e-05	0.000280515	yes
PLEKHM1	par72	vir_par72	OK	6.86068	21.8642	1.67215	3.18689	2.9507	5e-05	0.000280515	yes
KTI12	par72	vir_par72	OK	3.08847	9.83634	1.67123	3.18486	1.05334	0.00865	0.0300995	yes
FLCN	par72	vir_par72	OK	9.89697	31.4652	1.6687	3.17928	2.04906	5e-05	0.000280515	yes
SYVN1	par72	vir_par72	OK	33.8123	107.495	1.66865	3.17917	2.06133	5e-05	0.000280515	yes
PCOLCE2	par72	vir_par72	OK	0.707286	2.24756	1.668	3.17774	0.76468	0.00495	0.0184936	yes
RNF10	par72	vir_par72	OK	85.4797	271.528	1.66745	3.17653	3.49269	5e-05	0.000280515	yes
ZBTB11	par72	vir_par72	OK	10.7374	34.0903	1.66671	3.1749	4.95429	5e-05	0.000280515	yes
UGCG	par72	vir_par72	OK	31.9254	101.246	1.66509	3.17133	5.47555	5e-05	0.000280515	yes
IRF1	par72	vir_par72	OK	4.06431	12.889	1.66506	3.17127	3.9344	5e-05	0.000280515	yes
YY1AP1	par72	vir_par72	OK	19.4297	61.588	1.66439	3.1698	2.81917	5e-05	0.000280515	yes
PI4K2A	par72	vir_par72	OK	12.6169	39.9717	1.66362	3.1681	4.92532	5e-05	0.000280515	yes
ORAOV1	par72	vir_par72	OK	7.97922	25.2761	1.66345	3.16773	0.74569	0.0013	0.00562895	yes
SRP72P1	par72	vir_par72	OK	0.766337	2.42742	1.66337	3.16756	2.82687	5e-05	0.000280515	yes
PDHX	par72	vir_par72	OK	18.6868	59.1886	1.6633	3.1674	4.16665	5e-05	0.000280515	yes
IFI44	par72	vir_par72	OK	0.777729	2.46093	1.66187	3.16426	1.64182	5e-05	0.000280515	yes
SRA1	par72	vir_par72	OK	9.53238	30.1592	1.66169	3.16387	1.04885	0.0142	0.0461161	yes
ARMCX6	par72	vir_par72	OK	15.7293	49.7284	1.66061	3.1615	3.89932	5e-05	0.000280515	yes
SNHG12	par72	vir_par72	OK	21.188	66.9591	1.66003	3.16023	0.898764	0.00015	0.000786087	yes
RNF25	par72	vir_par72	OK	18.5734	58.6211	1.65818	3.15618	3.18191	5e-05	0.000280515	yes
ARFGAP1	par72	vir_par72	OK	18.2197	57.4675	1.65725	3.15415	3.53833	5e-05	0.000280515	yes
ZNF286B	par72	vir_par72	OK	1.54981	4.88477	1.65619	3.15183	1.05373	0.00075	0.00342499	yes
JOSD1	par72	vir_par72	OK	82.5134	260.042	1.65604	3.1515	3.99441	5e-05	0.000280515	yes
MXD1	par72	vir_par72	OK	8.62932	27.1803	1.65524	3.14976	4.51131	5e-05	0.000280515	yes
PDGFA	par72	vir_par72	OK	4.71248	14.8121	1.65222	3.14317	3.97281	5e-05	0.000280515	yes
MBD2	par72	vir_par72	OK	20.6972	65.0433	1.65197	3.14262	3.59423	5e-05	0.000280515	yes
ALG5	par72	vir_par72	OK	51.0255	160.352	1.65195	3.14258	3.09675	5e-05	0.000280515	yes
ZNF805	par72	vir_par72	OK	3.5502	11.1546	1.65166	3.14195	3.98566	5e-05	0.000280515	yes
COLQ	par72	vir_par72	OK	0.62731	1.97085	1.65157	3.14175	0.343925	0.0081	0.0284395	yes
FAM47E-STBD1	par72	vir_par72	OK	1.78587	5.61032	1.65146	3.14151	2.02304	0.00015	0.000786087	yes
MGAT5	par72	vir_par72	OK	15.4432	48.5024	1.65109	3.14071	2.3138	5e-05	0.000280515	yes
ZNF44	par72	vir_par72	OK	7.44051	23.3684	1.65108	3.14069	3.51999	5e-05	0.000280515	yes
EMP3	par72	vir_par72	OK	26.375	82.7378	1.64937	3.13697	3.95382	5e-05	0.000280515	yes
KRT80	par72	vir_par72	OK	20.4602	64.13	1.64818	3.13438	5.57798	5e-05	0.000280515	yes
TTC4	par72	vir_par72	OK	33.3263	104.437	1.6479	3.13377	3.5434	5e-05	0.000280515	yes
C4orf32	par72	vir_par72	OK	2.1682	6.78736	1.64635	3.13041	4.40481	5e-05	0.000280515	yes
GS1-124K5.12	par72	vir_par72	OK	4.04767	12.6609	1.64522	3.12796	2.68557	5e-05	0.000280515	yes
NIFK	par72	vir_par72	OK	41.5689	129.995	1.64488	3.12722	4.78885	5e-05	0.000280515	yes
RIT1	par72	vir_par72	OK	14.0111	43.7782	1.64364	3.12453	4.68763	5e-05	0.000280515	yes
AC026806.2	par72	vir_par72	OK	1.73076	5.40117	1.64186	3.12068	1.94295	0.00015	0.000786087	yes
RCE1	par72	vir_par72	OK	10.2399	31.9464	1.64145	3.11979	2.85227	5e-05	0.000280515	yes
DDX58	par72	vir_par72	OK	3.90307	12.1767	1.64144	3.11977	4.38128	5e-05	0.000280515	yes
MBNL2	par72	vir_par72	OK	80.3993	250.809	1.64133	3.11953	4.30226	5e-05	0.000280515	yes
MEF2D	par72	vir_par72	OK	9.83671	30.6787	1.64099	3.1188	4.8592	5e-05	0.000280515	yes
PPM1D	par72	vir_par72	OK	7.24576	22.5969	1.64092	3.11865	4.76058	5e-05	0.000280515	yes
POLR3D	par72	vir_par72	OK	10.0694	31.3916	1.6404	3.11752	4.31572	5e-05	0.000280515	yes
AFTPH	par72	vir_par72	OK	28.7527	89.6365	1.64039	3.1175	5.50438	5e-05	0.000280515	yes
ADAM17	par72	vir_par72	OK	22.341	69.6309	1.64003	3.11672	5.30656	5e-05	0.000280515	yes
ATP6V0B	par72	vir_par72	OK	45.9204	143.118	1.64	3.11666	4.47611	5e-05	0.000280515	yes
PELI1	par72	vir_par72	OK	26.5729	82.7435	1.63869	3.11383	5.4305	5e-05	0.000280515	yes
SPSB1	par72	vir_par72	OK	5.61933	17.464	1.63591	3.10784	4.52291	5e-05	0.000280515	yes
ADARB1	par72	vir_par72	OK	14.8821	46.2261	1.63513	3.10616	2.65801	5e-05	0.000280515	yes
SRPR	par72	vir_par72	OK	87.5417	271.573	1.6333	3.10222	4.77217	5e-05	0.000280515	yes
HEG1	par72	vir_par72	OK	2.00823	6.22869	1.63301	3.10159	2.5344	5e-05	0.000280515	yes
BTG3	par72	vir_par72	OK	21.7099	67.3298	1.63289	3.10134	4.44383	5e-05	0.000280515	yes
TOPORS	par72	vir_par72	OK	8.34044	25.8583	1.63243	3.10035	4.08246	5e-05	0.000280515	yes
ZNF850	par72	vir_par72	OK	12.0253	37.2814	1.63238	3.10024	1.87805	5e-05	0.000280515	yes
C1orf27	par72	vir_par72	OK	21.2032	65.6454	1.63041	3.09601	4.00045	5e-05	0.000280515	yes
MRPS31P5	par72	vir_par72	OK	4.42959	13.6957	1.62848	3.09187	2.30583	5e-05	0.000280515	yes
ADPRHL2	par72	vir_par72	OK	6.26688	19.3586	1.62716	3.08904	4.05646	5e-05	0.000280515	yes
KBTBD8	par72	vir_par72	OK	0.712687	2.19839	1.62511	3.08466	1.52866	5e-05	0.000280515	yes
FAM46C	par72	vir_par72	OK	2.14901	6.62703	1.62469	3.08376	4.20759	5e-05	0.000280515	yes
C11orf68	par72	vir_par72	OK	4.49579	13.851	1.62334	3.08087	3.50213	5e-05	0.000280515	yes
ZSWIM6	par72	vir_par72	OK	8.56917	26.3844	1.62246	3.079	5.17785	5e-05	0.000280515	yes
MAPK6	par72	vir_par72	OK	55.505	170.503	1.61911	3.07185	2.65077	5e-05	0.000280515	yes
TUSC2	par72	vir_par72	OK	11.6552	35.7495	1.61695	3.06726	3.15648	5e-05	0.000280515	yes
MTHFD2P7	par72	vir_par72	OK	20.6547	63.2078	1.61363	3.06021	4.51897	5e-05	0.000280515	yes
ZBTB48	par72	vir_par72	OK	9.9652	30.495	1.6136	3.06014	3.30451	5e-05	0.000280515	yes
HSPA14	par72	vir_par72	OK	18.5814	56.8362	1.61295	3.05877	4.29599	5e-05	0.000280515	yes
ZNF200	par72	vir_par72	OK	7.84391	23.9642	1.61123	3.05512	4.071	5e-05	0.000280515	yes
SEC23IP	par72	vir_par72	OK	38.23	116.66	1.60954	3.05155	2.82777	5e-05	0.000280515	yes
NUP98	par72	vir_par72	OK	63.9582	195.136	1.60928	3.051	2.53003	5e-05	0.000280515	yes
NDUFAF2	par72	vir_par72	OK	36.9336	112.674	1.60915	3.05072	3.83694	5e-05	0.000280515	yes
DONSON	par72	vir_par72	OK	11.6257	35.4435	1.60821	3.04873	0.760748	0.00995	0.0339577	yes
PKIB	par72	vir_par72	OK	18.8621	57.4851	1.60769	3.04763	4.59067	5e-05	0.000280515	yes
TMEM214	par72	vir_par72	OK	33.1944	101.018	1.6056	3.04322	3.56011	5e-05	0.000280515	yes
ARID5A	par72	vir_par72	OK	1.03853	3.15957	1.60519	3.04236	2.34434	5e-05	0.000280515	yes
TM2D2	par72	vir_par72	OK	22.382	68.0901	1.6051	3.04217	3.42767	5e-05	0.000280515	yes
VGLL3	par72	vir_par72	OK	0.861601	2.62047	1.60474	3.04141	2.47675	5e-05	0.000280515	yes
ELL	par72	vir_par72	OK	3.38509	10.2827	1.60295	3.03764	2.83699	5e-05	0.000280515	yes
ZNF93	par72	vir_par72	OK	1.09688	3.33129	1.60267	3.03705	2.366	5e-05	0.000280515	yes
AC104135.4	par72	vir_par72	OK	0.382782	1.16245	1.60257	3.03684	2.04314	5e-05	0.000280515	yes
ABHD5	par72	vir_par72	OK	8.78121	26.6653	1.60247	3.03663	1.97202	5e-05	0.000280515	yes
TRMT10C	par72	vir_par72	OK	21.8788	66.436	1.60243	3.03654	5.02664	5e-05	0.000280515	yes
RPN1	par72	vir_par72	OK	116.952	354.993	1.60187	3.03536	5.48227	5e-05	0.000280515	yes
FUT1	par72	vir_par72	OK	13.994	42.4395	1.6006	3.03269	3.81612	5e-05	0.000280515	yes
ZKSCAN5	par72	vir_par72	OK	6.5256	19.7857	1.60028	3.03202	5.00144	5e-05	0.000280515	yes
SPATA2	par72	vir_par72	OK	3.23656	9.81194	1.60008	3.0316	4.00563	5e-05	0.000280515	yes
TREML3P	par72	vir_par72	OK	5.78912	17.5438	1.59955	3.03049	2.75213	5e-05	0.000280515	yes
ARAP2	par72	vir_par72	OK	4.67469	14.1659	1.59948	3.03034	2.6877	5e-05	0.000280515	yes
ELL2P1	par72	vir_par72	OK	1.19987	3.6357	1.59935	3.03007	2.98965	5e-05	0.000280515	yes
BCL10	par72	vir_par72	OK	18.3674	55.632	1.59877	3.02885	2.91065	5e-05	0.000280515	yes
ARNTL	par72	vir_par72	OK	10.5515	31.9581	1.59873	3.02877	3.14551	5e-05	0.000280515	yes
HLA-K	par72	vir_par72	OK	0.414572	1.25454	1.59746	3.0261	1.9973	5e-05	0.000280515	yes
FNTAL1	par72	vir_par72	OK	1.4751	4.46311	1.59723	3.02562	2.77395	5e-05	0.000280515	yes
TMEM81	par72	vir_par72	OK	2.70305	8.17622	1.59685	3.02482	3.25935	5e-05	0.000280515	yes
OVOL1	par72	vir_par72	OK	7.68107	23.2229	1.59617	3.0234	4.4568	5e-05	0.000280515	yes
ZNF571	par72	vir_par72	OK	7.1272	21.5436	1.59585	3.02273	1.66248	5e-05	0.000280515	yes
ORMDL2	par72	vir_par72	OK	37.238	112.487	1.59491	3.02076	2.4457	5e-05	0.000280515	yes
CTR9	par72	vir_par72	OK	25.9105	78.2316	1.59421	3.01929	4.56179	5e-05	0.000280515	yes
PHLDA1	par72	vir_par72	OK	28.5237	86.0717	1.59338	3.01755	5.55334	5e-05	0.000280515	yes
GNA13	par72	vir_par72	OK	33.5145	100.992	1.59138	3.01337	5.55215	5e-05	0.000280515	yes
WDR66	par72	vir_par72	OK	0.394597	1.18621	1.58791	3.00614	0.682169	0.0054	0.0199635	yes
RP5-1053E7.3	par72	vir_par72	OK	1.19189	3.57975	1.58661	3.00343	2.06011	5e-05	0.000280515	yes
GSR	par72	vir_par72	OK	89.9967	270.263	1.58642	3.00303	5.53003	5e-05	0.000280515	yes
KCMF1	par72	vir_par72	OK	55.7375	167.122	1.58418	2.99837	3.31153	5e-05	0.000280515	yes
CYB5R4	par72	vir_par72	OK	4.04634	12.1275	1.58359	2.99715	1.92552	5e-05	0.000280515	yes
TTC4P1	par72	vir_par72	OK	0.707962	2.12166	1.58345	2.99686	2.31807	5e-05	0.000280515	yes
RIC8B	par72	vir_par72	OK	5.60636	16.7828	1.58185	2.99353	2.78301	5e-05	0.000280515	yes
HM13	par72	vir_par72	OK	116.071	347.293	1.58115	2.99208	4.98251	5e-05	0.000280515	yes
NANOS1	par72	vir_par72	OK	2.50724	7.49067	1.57899	2.98761	2.58439	5e-05	0.000280515	yes
TERF2IP	par72	vir_par72	OK	26.2625	78.3401	1.57675	2.98297	2.3629	5e-05	0.000280515	yes
SNRK	par72	vir_par72	OK	8.21263	24.4746	1.57537	2.98012	3.18649	5e-05	0.000280515	yes
RP11-453D16.1	par72	vir_par72	OK	0.783466	2.33455	1.5752	2.97977	1.30774	0.0062	0.0225278	yes
PTHLH	par72	vir_par72	OK	0.479974	1.43018	1.57517	2.97971	1.48662	5e-05	0.000280515	yes
MTHFD2	par72	vir_par72	OK	198.787	591.995	1.57436	2.97803	4.40811	5e-05	0.000280515	yes
CALU	par72	vir_par72	OK	160.256	476.823	1.57308	2.97539	5.01198	5e-05	0.000280515	yes
DNAJC27	par72	vir_par72	OK	3.72797	11.0875	1.57247	2.97413	2.63312	5e-05	0.000280515	yes
HIC2	par72	vir_par72	OK	2.32028	6.89887	1.57206	2.97329	4.25724	5e-05	0.000280515	yes
TBC1D20	par72	vir_par72	OK	20.1479	59.9003	1.57193	2.97302	5.29402	5e-05	0.000280515	yes
ITSN1	par72	vir_par72	OK	13.138	39.0523	1.57166	2.97247	0.587676	0.00015	0.000786087	yes
BRMS1	par72	vir_par72	OK	13.0796	38.867	1.57122	2.97156	3.92851	5e-05	0.000280515	yes
ZCCHC9	par72	vir_par72	OK	23.6397	70.2259	1.57079	2.97067	4.44995	5e-05	0.000280515	yes
ZSCAN9	par72	vir_par72	OK	9.82197	29.1626	1.57004	2.96913	4.16693	5e-05	0.000280515	yes
RP5-1051J4.4	par72	vir_par72	OK	34.4411	102.252	1.56992	2.96888	3.38941	5e-05	0.000280515	yes
GRAMD3	par72	vir_par72	OK	9.07948	26.9546	1.56985	2.96874	3.46297	5e-05	0.000280515	yes
PALLD	par72	vir_par72	OK	11.5124	34.157	1.56899	2.96697	3.25152	5e-05	0.000280515	yes
NPIPB11	par72	vir_par72	OK	0.678735	2.01362	1.56887	2.96672	1.782	0.00015	0.000786087	yes
ZNF3	par72	vir_par72	OK	42.4362	125.895	1.56885	2.96668	3.15424	5e-05	0.000280515	yes
PER1	par72	vir_par72	OK	11.5723	34.3032	1.56767	2.96426	1.69169	5e-05	0.000280515	yes
ARID4B	par72	vir_par72	OK	12.4308	36.8152	1.56638	2.96161	1.47388	5e-05	0.000280515	yes
DRG1	par72	vir_par72	OK	92.9448	275.199	1.56603	2.96089	2.7288	5e-05	0.000280515	yes
AGO3	par72	vir_par72	OK	6.52482	19.3084	1.56521	2.95921	2.6711	5e-05	0.000280515	yes
LRIG2	par72	vir_par72	OK	9.96608	29.4875	1.56501	2.9588	3.18693	5e-05	0.000280515	yes
ATAT1	par72	vir_par72	OK	4.19565	12.4134	1.56493	2.95863	2.93767	5e-05	0.000280515	yes
LINC00152	par72	vir_par72	OK	57.0902	168.879	1.56468	2.95812	4.43788	5e-05	0.000280515	yes
NOL10	par72	vir_par72	OK	19.2226	56.8543	1.56447	2.95769	4.21554	5e-05	0.000280515	yes
LMO7	par72	vir_par72	OK	46.6417	137.943	1.56438	2.9575	2.73753	5e-05	0.000280515	yes
SRP72P2	par72	vir_par72	OK	6.67083	19.7034	1.56251	2.95367	2.82288	5e-05	0.000280515	yes
KIAA1551	par72	vir_par72	OK	33.4347	98.7411	1.56231	2.95326	1.93922	5e-05	0.000280515	yes
ZNF627	par72	vir_par72	OK	20.39	60.2008	1.56192	2.95247	3.27191	5e-05	0.000280515	yes
ZNF433	par72	vir_par72	OK	0.615194	1.81605	1.56169	2.95199	1.17826	5e-05	0.000280515	yes
NAT9	par72	vir_par72	OK	43.5448	128.535	1.56159	2.95179	4.00786	5e-05	0.000280515	yes
TADA2B	par72	vir_par72	OK	9.62507	28.4101	1.56153	2.95167	2.57855	5e-05	0.000280515	yes
SPATA5L1	par72	vir_par72	OK	5.98865	17.6583	1.56004	2.94862	2.38346	5e-05	0.000280515	yes
CMPK2	par72	vir_par72	OK	0.471613	1.38988	1.55928	2.94707	1.10268	0.00205	0.00846745	yes
HOTAIRM1	par72	vir_par72	OK	10.8079	31.8291	1.55826	2.94498	3.25203	5e-05	0.000280515	yes
PRPF38AP2	par72	vir_par72	OK	2.9559	8.7015	1.55767	2.94378	2.95997	5e-05	0.000280515	yes
TTN-AS1	par72	vir_par72	OK	6.91392	20.3469	1.55723	2.94288	2.55923	5e-05	0.000280515	yes
DNAJB2	par72	vir_par72	OK	21.3304	62.6734	1.55494	2.93822	3.43924	5e-05	0.000280515	yes
SLC30A7	par72	vir_par72	OK	16.6542	48.923	1.55463	2.93758	3.39439	5e-05	0.000280515	yes
LEF1	par72	vir_par72	OK	0.494075	1.45111	1.55435	2.93701	1.09881	5e-05	0.000280515	yes
KLHL25	par72	vir_par72	OK	0.70404	2.06668	1.55359	2.93547	2.47977	5e-05	0.000280515	yes
LRRC37BP1	par72	vir_par72	OK	4.3006	12.6168	1.55274	2.93374	2.33054	5e-05	0.000280515	yes
SERTAD3	par72	vir_par72	OK	19.4107	56.9444	1.5527	2.93366	4.17835	5e-05	0.000280515	yes
SIRT1	par72	vir_par72	OK	24.0199	70.4115	1.55158	2.93138	4.94817	5e-05	0.000280515	yes
SAP30BP	par72	vir_par72	OK	41.3711	121.244	1.55122	2.93065	3.46385	5e-05	0.000280515	yes
TMF1	par72	vir_par72	OK	16.2008	47.3815	1.54826	2.92464	3.18167	5e-05	0.000280515	yes
RNMT	par72	vir_par72	OK	30.5998	89.3669	1.54622	2.92051	3.20686	5e-05	0.000280515	yes
RABEPK	par72	vir_par72	OK	14.4213	42.1167	1.54619	2.92045	4.32995	5e-05	0.000280515	yes
UVRAG	par72	vir_par72	OK	13.5685	39.619	1.54593	2.91992	3.70391	5e-05	0.000280515	yes
B4GALT5	par72	vir_par72	OK	54.5379	159.115	1.54474	2.91751	5.45703	5e-05	0.000280515	yes
RDX	par72	vir_par72	OK	18.4964	53.9319	1.54389	2.9158	4.46157	5e-05	0.000280515	yes
CXorf40B	par72	vir_par72	OK	6.08108	17.729	1.54371	2.91543	2.82092	5e-05	0.000280515	yes
MED17	par72	vir_par72	OK	21.242	61.9139	1.54334	2.91469	1.15578	0.00025	0.00125904	yes
LONRF1	par72	vir_par72	OK	17.2802	50.2657	1.54045	2.90885	3.97602	5e-05	0.000280515	yes
NT5C2	par72	vir_par72	OK	260.165	756.48	1.53988	2.9077	1.74948	5e-05	0.000280515	yes
SAFB2	par72	vir_par72	OK	17.0959	49.7064	1.53978	2.9075	2.07848	5e-05	0.000280515	yes
WDR75	par72	vir_par72	OK	69.5847	202.236	1.5392	2.90633	3.70541	5e-05	0.000280515	yes
VPS18	par72	vir_par72	OK	15.2954	44.4123	1.53786	2.90363	3.43344	5e-05	0.000280515	yes
DENND4A	par72	vir_par72	OK	8.18511	23.7604	1.53748	2.90287	1.73902	5e-05	0.000280515	yes
H3F3B	par72	vir_par72	OK	173.781	504.279	1.53695	2.9018	4.08817	5e-05	0.000280515	yes
RPLP0P2	par72	vir_par72	OK	0.960182	2.78494	1.53627	2.90044	1.36532	0.0006	0.00279836	yes
IGFBP3	par72	vir_par72	OK	0.638359	1.85136	1.53615	2.9002	1.73903	5e-05	0.000280515	yes
ACTR3B	par72	vir_par72	OK	8.41376	24.3787	1.5348	2.89748	4.11404	5e-05	0.000280515	yes
TCP11L2	par72	vir_par72	OK	9.94153	28.8015	1.53461	2.8971	1.56774	5e-05	0.000280515	yes
PPP4C	par72	vir_par72	OK	17.5619	50.8403	1.53352	2.89491	4.25307	5e-05	0.000280515	yes
RCHY1	par72	vir_par72	OK	44.6645	129.299	1.53351	2.89489	2.98546	5e-05	0.000280515	yes
UBR5	par72	vir_par72	OK	17.378	50.2454	1.53173	2.89132	2.08004	5e-05	0.000280515	yes
CCDC149	par72	vir_par72	OK	4.0724	11.7704	1.53122	2.8903	3.55952	5e-05	0.000280515	yes
LAMA3	par72	vir_par72	OK	4.83154	13.9624	1.53099	2.88984	3.12014	5e-05	0.000280515	yes
MUC20	par72	vir_par72	OK	5.64802	16.3146	1.53035	2.88856	2.01455	5e-05	0.000280515	yes
THSD1	par72	vir_par72	OK	0.559067	1.61444	1.52994	2.88774	2.7551	5e-05	0.000280515	yes
RP11-574K11.28	par72	vir_par72	OK	1.6246	4.68538	1.52808	2.88402	2.06536	5e-05	0.000280515	yes
FXR2	par72	vir_par72	OK	17.9185	51.6673	1.52781	2.88348	1.35508	5e-05	0.000280515	yes
NSMCE2	par72	vir_par72	OK	51.7586	149.143	1.52683	2.88152	3.10106	5e-05	0.000280515	yes
NUS1	par72	vir_par72	OK	14.1963	40.9032	1.52669	2.88124	5.00837	5e-05	0.000280515	yes
ASB1	par72	vir_par72	OK	12.5123	36.0366	1.52611	2.88008	4.37975	5e-05	0.000280515	yes
SURF4	par72	vir_par72	OK	100.716	289.849	1.52501	2.87789	4.09588	5e-05	0.000280515	yes
TSSC1	par72	vir_par72	OK	9.90712	28.5017	1.52451	2.87689	3.25145	5e-05	0.000280515	yes
HSF2	par72	vir_par72	OK	7.47177	21.4906	1.52418	2.87623	4.28933	5e-05	0.000280515	yes
THAP9	par72	vir_par72	OK	4.0004	11.4999	1.5234	2.87468	0.867177	0.00295	0.011699	yes
PPP4R1L	par72	vir_par72	OK	3.49491	10.0455	1.52322	2.87432	2.63187	5e-05	0.000280515	yes
BTG1	par72	vir_par72	OK	40.0446	115.028	1.52231	2.87251	5.19992	5e-05	0.000280515	yes
YIPF5	par72	vir_par72	OK	94.9928	272.792	1.52191	2.87171	4.0006	5e-05	0.000280515	yes
TRAF4	par72	vir_par72	OK	24.0647	69.0827	1.52141	2.87071	3.34051	5e-05	0.000280515	yes
SLC30A5	par72	vir_par72	OK	37.6208	107.997	1.52139	2.87067	4.18343	5e-05	0.000280515	yes
ARID3A	par72	vir_par72	OK	2.22161	6.37736	1.52135	2.8706	2.23452	5e-05	0.000280515	yes
ZNF223	par72	vir_par72	OK	8.25407	23.6699	1.51988	2.86767	2.02524	5e-05	0.000280515	yes
GSPT2	par72	vir_par72	OK	13.3758	38.347	1.51949	2.8669	4.83593	5e-05	0.000280515	yes
LETM2	par72	vir_par72	OK	1.65715	4.74123	1.51656	2.86108	1.69887	5e-05	0.000280515	yes
GPR89B	par72	vir_par72	OK	0.832072	2.38009	1.51623	2.86043	2.06996	5e-05	0.000280515	yes
TRIM16	par72	vir_par72	OK	29.031	83.041	1.51623	2.86043	3.32661	5e-05	0.000280515	yes
MSMO1	par72	vir_par72	OK	189.628	542.144	1.51551	2.859	5.09495	5e-05	0.000280515	yes
RP11-434C1.3	par72	vir_par72	OK	0.682096	1.95006	1.51547	2.85892	2.35819	5e-05	0.000280515	yes
IRGQ	par72	vir_par72	OK	7.20378	20.5903	1.51514	2.85827	3.79302	5e-05	0.000280515	yes
EIF1AD	par72	vir_par72	OK	18.9866	54.2574	1.51483	2.85765	2.73346	5e-05	0.000280515	yes
FAF2	par72	vir_par72	OK	44.5797	127.352	1.51437	2.85674	5.12029	5e-05	0.000280515	yes
RP11-384K6.6	par72	vir_par72	OK	0.848526	2.4214	1.51281	2.85365	2.79797	5e-05	0.000280515	yes
LAT2	par72	vir_par72	OK	2.63175	7.50788	1.51238	2.8528	2.50023	5e-05	0.000280515	yes
MRPL33	par72	vir_par72	OK	202.614	577.824	1.5119	2.85185	3.79414	5e-05	0.000280515	yes
AKIRIN2	par72	vir_par72	OK	49.0272	139.801	1.51172	2.8515	3.01899	5e-05	0.000280515	yes
DCP1A	par72	vir_par72	OK	20.5063	58.4346	1.51076	2.8496	3.97479	5e-05	0.000280515	yes
SPIRE1	par72	vir_par72	OK	22.1538	63.119	1.51052	2.84913	3.19691	5e-05	0.000280515	yes
UQCRFS1P1	par72	vir_par72	OK	2.61805	7.45386	1.5095	2.84711	2.58907	5e-05	0.000280515	yes
C12orf23	par72	vir_par72	OK	31.5089	89.6962	1.50929	2.8467	4.5601	5e-05	0.000280515	yes
PNPT1	par72	vir_par72	OK	17.4089	49.4725	1.5068	2.84179	3.11181	5e-05	0.000280515	yes
DNAH14	par72	vir_par72	OK	11.3249	32.1444	1.50507	2.83838	2.99133	5e-05	0.000280515	yes
UFD1L	par72	vir_par72	OK	34.149	96.8492	1.5039	2.83608	2.18957	5e-05	0.000280515	yes
ZNF286A	par72	vir_par72	OK	9.19789	26.0773	1.50342	2.83514	2.05716	5e-05	0.000280515	yes
SMN1	par72	vir_par72	OK	2.61235	7.40334	1.50283	2.83398	3.03039	5e-05	0.000280515	yes
MPHOSPH10	par72	vir_par72	OK	14.3012	40.5218	1.50256	2.83345	4.48191	5e-05	0.000280515	yes
NFRKB	par72	vir_par72	OK	19.3667	54.854	1.50201	2.83237	2.9417	5e-05	0.000280515	yes
EXOC8	par72	vir_par72	OK	10.8928	30.8497	1.50188	2.83212	4.43464	5e-05	0.000280515	yes
IP6K1	par72	vir_par72	OK	13.5568	38.383	1.50145	2.83127	4.81411	5e-05	0.000280515	yes
EREG	par72	vir_par72	OK	72.1485	204.156	1.50063	2.82966	4.81105	5e-05	0.000280515	yes
KCTD21	par72	vir_par72	OK	4.33139	12.2526	1.50018	2.82878	2.01366	5e-05	0.000280515	yes
MED10	par72	vir_par72	OK	32.1685	90.9428	1.49931	2.82707	4.437	5e-05	0.000280515	yes
ZNF133	par72	vir_par72	OK	8.8677	25.0421	1.49773	2.82398	2.18711	5e-05	0.000280515	yes
ATAD2B	par72	vir_par72	OK	3.5762	10.0927	1.49682	2.8222	2.22131	5e-05	0.000280515	yes
NOMO2	par72	vir_par72	OK	1.9938	5.62289	1.49579	2.82019	2.81806	5e-05	0.000280515	yes
CREM	par72	vir_par72	OK	12.3856	34.8858	1.49398	2.81665	2.97598	5e-05	0.000280515	yes
CCNT2	par72	vir_par72	OK	18.6368	52.4715	1.49338	2.81548	3.88864	5e-05	0.000280515	yes
ZNF202	par72	vir_par72	OK	5.85012	16.4689	1.4932	2.81513	2.90098	5e-05	0.000280515	yes
C14orf28	par72	vir_par72	OK	2.34889	6.6054	1.49166	2.81212	2.91562	5e-05	0.000280515	yes
RP11-325P15.1	par72	vir_par72	OK	0.922387	2.59351	1.49146	2.81173	1.72808	0.00025	0.00125904	yes
FOCAD	par72	vir_par72	OK	45.5718	128.017	1.49012	2.80912	2.38878	5e-05	0.000280515	yes
AHI1	par72	vir_par72	OK	11.3892	31.9913	1.49001	2.80891	2.73398	5e-05	0.000280515	yes
RP6-99M1.2	par72	vir_par72	OK	1.35956	3.81575	1.48883	2.80661	2.46981	5e-05	0.000280515	yes
TMEM189	par72	vir_par72	OK	8.30618	23.3103	1.48871	2.80638	1.40989	0.0095	0.0326339	yes
ZFPL1	par72	vir_par72	OK	15.0469	42.2026	1.48787	2.80475	2.38386	5e-05	0.000280515	yes
ZNF281	par72	vir_par72	OK	11.3496	31.8325	1.48786	2.80473	4.87757	5e-05	0.000280515	yes
RP1-281H8.3	par72	vir_par72	OK	2.43029	6.81254	1.48707	2.80319	2.59093	5e-05	0.000280515	yes
LSG1	par72	vir_par72	OK	17.4463	48.7689	1.48304	2.79537	3.24943	5e-05	0.000280515	yes
TAF1A	par72	vir_par72	OK	13.3278	37.2414	1.48247	2.79427	3.55461	5e-05	0.000280515	yes
SELM	par72	vir_par72	OK	2.85867	7.97966	1.48098	2.79138	2.15719	5e-05	0.000280515	yes
PQLC2	par72	vir_par72	OK	2.03903	5.69139	1.4809	2.79123	2.57967	5e-05	0.000280515	yes
KEAP1	par72	vir_par72	OK	16.5319	46.1437	1.48089	2.79121	3.09514	5e-05	0.000280515	yes
IL18BP	par72	vir_par72	OK	2.11235	5.89156	1.4798	2.7891	0.745282	0.01165	0.0389473	yes
CGRRF1	par72	vir_par72	OK	19.2606	53.7138	1.47964	2.78879	3.25615	5e-05	0.000280515	yes
ERO1LB	par72	vir_par72	OK	29.874	83.2608	1.47875	2.78707	4.71191	5e-05	0.000280515	yes
PNPT1P1	par72	vir_par72	OK	1.7358	4.83635	1.47831	2.78622	1.6836	0.0011	0.00484329	yes
INPP1	par72	vir_par72	OK	20.685	57.6271	1.47817	2.78595	1.90998	5e-05	0.000280515	yes
PMM2	par72	vir_par72	OK	33.3555	92.9024	1.47779	2.78522	2.62262	5e-05	0.000280515	yes
RPAP2	par72	vir_par72	OK	12.1606	33.8499	1.47693	2.78356	1.93546	5e-05	0.000280515	yes
SLC6A12	par72	vir_par72	OK	0.627858	1.74747	1.47675	2.78321	1.09324	5e-05	0.000280515	yes
CAMSAP1	par72	vir_par72	OK	10.7715	29.9737	1.47647	2.78267	4.71641	5e-05	0.000280515	yes
SLC12A4	par72	vir_par72	OK	16.7557	46.6098	1.47598	2.78173	2.48029	5e-05	0.000280515	yes
TNFRSF10B	par72	vir_par72	OK	130.497	362.503	1.47398	2.77787	4.21757	5e-05	0.000280515	yes
UIMC1	par72	vir_par72	OK	14.0754	39.0402	1.47179	2.77366	3.92186	5e-05	0.000280515	yes
TAGLN	par72	vir_par72	OK	1.87244	5.1898	1.47076	2.77168	1.19932	0.00495	0.0184936	yes
GPATCH3	par72	vir_par72	OK	2.96352	8.21381	1.47074	2.77164	2.22324	5e-05	0.000280515	yes
C6orf106	par72	vir_par72	OK	54.8023	151.862	1.47045	2.77108	5.15902	5e-05	0.000280515	yes
FGFR1OP2	par72	vir_par72	OK	19.4364	53.853	1.47027	2.77074	4.67315	5e-05	0.000280515	yes
APPBP2	par72	vir_par72	OK	38.5176	106.617	1.46885	2.76801	2.25284	5e-05	0.000280515	yes
SRP54	par72	vir_par72	OK	71.6359	198.286	1.46883	2.76797	3.41708	5e-05	0.000280515	yes
C12orf5	par72	vir_par72	OK	17.0606	47.1973	1.46804	2.76646	4.24482	5e-05	0.000280515	yes
DDIT4	par72	vir_par72	OK	322.623	891.75	1.46679	2.76406	4.73937	5e-05	0.000280515	yes
CCDC59	par72	vir_par72	OK	42.9144	118.572	1.46623	2.76299	3.57878	5e-05	0.000280515	yes
LRP5L	par72	vir_par72	OK	1.48752	4.10926	1.46597	2.76249	2.21028	5e-05	0.000280515	yes
UTP23	par72	vir_par72	OK	11.9566	33.0195	1.46551	2.76161	1.22716	0.0036	0.0139619	yes
BOD1	par72	vir_par72	OK	50.2612	138.521	1.46259	2.75603	4.77467	5e-05	0.000280515	yes
ESYT3	par72	vir_par72	OK	2.36843	6.52488	1.46202	2.75494	1.94334	5e-05	0.000280515	yes
EGLN3	par72	vir_par72	OK	4.54454	12.5183	1.46183	2.75458	1.21157	0.00125	0.00543393	yes
KARS	par72	vir_par72	OK	120.2	330.807	1.46055	2.75213	4.31956	5e-05	0.000280515	yes
ANGPTL4	par72	vir_par72	OK	5.36313	14.7533	1.45989	2.75087	1.78827	0.00025	0.00125904	yes
INSIG2	par72	vir_par72	OK	38.6744	106.383	1.45981	2.75072	3.88192	5e-05	0.000280515	yes
SRRD	par72	vir_par72	OK	15.4088	42.3418	1.45833	2.7479	2.03053	5e-05	0.000280515	yes
TMCO3	par72	vir_par72	OK	136.132	374.04	1.45818	2.74762	3.93794	5e-05	0.000280515	yes
PDIA4	par72	vir_par72	OK	121.978	335.117	1.45805	2.74737	4.8575	5e-05	0.000280515	yes
ZNF669	par72	vir_par72	OK	7.41462	20.3673	1.45781	2.74691	3.82526	5e-05	0.000280515	yes
TMEM199	par72	vir_par72	OK	5.59701	15.3662	1.45703	2.74543	1.54146	5e-05	0.000280515	yes
ALS2CR12	par72	vir_par72	OK	0.364711	1.00128	1.45702	2.74541	0.844772	0.0017	0.00716419	yes
FOSL2	par72	vir_par72	OK	23.1952	63.6709	1.45681	2.74501	5.0919	5e-05	0.000280515	yes
CTC-512J14.5	par72	vir_par72	OK	15.9787	43.8612	1.4568	2.74499	3.84428	5e-05	0.000280515	yes
GPX3	par72	vir_par72	OK	14.3204	39.302	1.45653	2.74447	3.80247	5e-05	0.000280515	yes
FBXO38	par72	vir_par72	OK	37.6251	103.181	1.45541	2.74234	3.11126	5e-05	0.000280515	yes
AP4B1	par72	vir_par72	OK	8.01568	21.968	1.45451	2.74063	1.42317	5e-05	0.000280515	yes
MRPL49	par72	vir_par72	OK	47.9029	131.256	1.4542	2.74005	2.98031	5e-05	0.000280515	yes
KCTD6	par72	vir_par72	OK	11.4703	31.4065	1.45316	2.73807	3.62957	5e-05	0.000280515	yes
MED15	par72	vir_par72	OK	13.1376	35.9455	1.45211	2.73608	2.86933	5e-05	0.000280515	yes
ILKAP	par72	vir_par72	OK	11.2918	30.8817	1.45148	2.73488	3.65281	5e-05	0.000280515	yes
DMTF1	par72	vir_par72	OK	32.7754	89.631	1.45139	2.73471	2.50308	5e-05	0.000280515	yes
NXT1	par72	vir_par72	OK	7.72134	21.1148	1.45133	2.7346	3.50924	5e-05	0.000280515	yes
NET1	par72	vir_par72	OK	66.3565	181.418	1.451	2.73397	3.41502	5e-05	0.000280515	yes
DDX19A	par72	vir_par72	OK	12.5692	34.3533	1.45055	2.73312	1.98079	5e-05	0.000280515	yes
AC097523.3	par72	vir_par72	OK	2.89243	7.90512	1.4505	2.73303	2.36922	5e-05	0.000280515	yes
SYBU	par72	vir_par72	OK	1.20743	3.29864	1.44993	2.73195	1.3552	5e-05	0.000280515	yes
MTUS1	par72	vir_par72	OK	13.5953	37.1303	1.44949	2.73111	3.3335	5e-05	0.000280515	yes
RNF181	par72	vir_par72	OK	121.148	330.809	1.44923	2.73062	4.49209	5e-05	0.000280515	yes
AC005789.11	par72	vir_par72	OK	0.721864	1.97074	1.44894	2.73007	2.27803	5e-05	0.000280515	yes
TTI2	par72	vir_par72	OK	10.0614	27.4666	1.44884	2.72988	1.54544	0.00015	0.000786087	yes
PIM1	par72	vir_par72	OK	25.7431	70.2276	1.44785	2.72801	4.6714	5e-05	0.000280515	yes
RP5-837I24.1	par72	vir_par72	OK	0.574394	1.56675	1.44766	2.72765	2.23565	5e-05	0.000280515	yes
CHIC2	par72	vir_par72	OK	6.98465	19.0484	1.44741	2.72718	1.08058	0.00455	0.0171695	yes
RNF166	par72	vir_par72	OK	1.96048	5.34646	1.44738	2.72712	2.25969	5e-05	0.000280515	yes
CTB-50E14.5	par72	vir_par72	OK	30.4319	82.9903	1.44736	2.72709	3.26512	5e-05	0.000280515	yes
BCL2L13	par72	vir_par72	OK	79.9074	217.723	1.44609	2.72469	2.73277	5e-05	0.000280515	yes
TSKU	par72	vir_par72	OK	14.8463	40.4353	1.44551	2.72359	4.33288	5e-05	0.000280515	yes
DAGLB	par72	vir_par72	OK	5.184	14.1179	1.44538	2.72335	1.0388	0.00135	0.00582408	yes
MRGBP	par72	vir_par72	OK	11.9008	32.3843	1.44423	2.72118	4.16822	5e-05	0.000280515	yes
RBM33	par72	vir_par72	OK	10.5897	28.8019	1.4435	2.7198	3.87009	5e-05	0.000280515	yes
RP11-48B3.4	par72	vir_par72	OK	0.565292	1.5365	1.44258	2.71807	2.02832	5e-05	0.000280515	yes
ICA1	par72	vir_par72	OK	71.1784	193.293	1.44128	2.71562	3.60794	5e-05	0.000280515	yes
CREB3	par72	vir_par72	OK	19.1225	51.8944	1.44031	2.71379	1.5555	0.00065	0.00300853	yes
MED8	par72	vir_par72	OK	24.2511	65.8107	1.44027	2.71372	4.4001	5e-05	0.000280515	yes
DPH7	par72	vir_par72	OK	13.6574	37.0615	1.44024	2.71366	3.34542	5e-05	0.000280515	yes
RP1-153G14.4	par72	vir_par72	OK	0.605441	1.64295	1.44023	2.71364	2.3892	5e-05	0.000280515	yes
TRA2A	par72	vir_par72	OK	99.4941	269.918	1.43984	2.71291	3.1738	5e-05	0.000280515	yes
TRIM5	par72	vir_par72	OK	37.9054	102.821	1.43966	2.71257	4.14567	5e-05	0.000280515	yes
ACOT9	par72	vir_par72	OK	20.6736	56.0687	1.4394	2.71208	3.86749	5e-05	0.000280515	yes
RP11-752L20.1	par72	vir_par72	OK	0.920535	2.49573	1.43892	2.71118	1.63038	0.0005	0.00237265	yes
STIP1	par72	vir_par72	OK	128.704	348.837	1.4385	2.71039	3.94072	5e-05	0.000280515	yes
PPP2R2A	par72	vir_par72	OK	67.2776	182.301	1.43812	2.70968	4.25699	5e-05	0.000280515	yes
ITCH	par72	vir_par72	OK	65.2396	176.717	1.43762	2.70874	1.34095	0.0002	0.00102556	yes
SGMS2	par72	vir_par72	OK	22.8547	61.9073	1.43762	2.70874	3.19021	5e-05	0.000280515	yes
TJP1	par72	vir_par72	OK	60.2941	163.264	1.43711	2.70778	2.89593	5e-05	0.000280515	yes
GOLGA3	par72	vir_par72	OK	12.6345	34.2033	1.43677	2.70714	0.674975	5e-05	0.000280515	yes
ZNF26	par72	vir_par72	OK	6.36937	17.2413	1.43665	2.70692	2.40894	5e-05	0.000280515	yes
SLC35E1	par72	vir_par72	OK	24.3846	65.999	1.43647	2.70658	2.02282	5e-05	0.000280515	yes
SLC37A3	par72	vir_par72	OK	29.0665	78.6623	1.43632	2.7063	3.35819	5e-05	0.000280515	yes
SELK	par72	vir_par72	OK	69.9455	189.117	1.43498	2.70378	4.47513	5e-05	0.000280515	yes
ANKRD17	par72	vir_par72	OK	29.8025	80.5744	1.43489	2.70362	3.15011	5e-05	0.000280515	yes
RPS6KB2	par72	vir_par72	OK	10.013	27.0682	1.43472	2.7033	3.29882	5e-05	0.000280515	yes
CHAC1	par72	vir_par72	OK	10.9074	29.4817	1.43451	2.7029	3.18075	5e-05	0.000280515	yes
IER5	par72	vir_par72	OK	16.4409	44.4369	1.43447	2.70283	4.44913	5e-05	0.000280515	yes
CTA-29F11.1	par72	vir_par72	OK	7.01167	18.9405	1.43364	2.70127	2.89338	5e-05	0.000280515	yes
ELF4	par72	vir_par72	OK	8.49556	22.9409	1.43314	2.70034	4.11104	5e-05	0.000280515	yes
CTD-2006C1.2	par72	vir_par72	OK	7.5477	20.3754	1.43272	2.69955	2.39766	5e-05	0.000280515	yes
ETV3	par72	vir_par72	OK	28.1337	75.9355	1.43248	2.6991	4.97501	5e-05	0.000280515	yes
SMAD3	par72	vir_par72	OK	12.7784	34.4799	1.43205	2.6983	4.06883	5e-05	0.000280515	yes
SLC25A28	par72	vir_par72	OK	11.8213	31.8968	1.43202	2.69824	3.24667	5e-05	0.000280515	yes
KATNA1	par72	vir_par72	OK	6.49657	17.5248	1.43164	2.69753	3.52523	5e-05	0.000280515	yes
ESCO1	par72	vir_par72	OK	13.1481	35.4606	1.43136	2.69701	4.73665	5e-05	0.000280515	yes
TNFRSF10D	par72	vir_par72	OK	25.2307	68.0368	1.43114	2.6966	4.91712	5e-05	0.000280515	yes
TOR1B	par72	vir_par72	OK	16.6413	44.8741	1.43111	2.69654	4.11254	5e-05	0.000280515	yes
TGFA	par72	vir_par72	OK	20.0311	53.9796	1.43017	2.69478	4.47516	5e-05	0.000280515	yes
OAZ1	par72	vir_par72	OK	141.463	381.192	1.43009	2.69464	4.67667	5e-05	0.000280515	yes
PPRC1	par72	vir_par72	OK	13.7458	37.0368	1.42997	2.69441	3.66649	5e-05	0.000280515	yes
METRNL	par72	vir_par72	OK	5.08079	13.6861	1.42959	2.6937	3.01367	5e-05	0.000280515	yes
AKAP10	par72	vir_par72	OK	13.9052	37.4272	1.42846	2.69159	2.94015	5e-05	0.000280515	yes
LRRC59	par72	vir_par72	OK	104.374	280.865	1.42811	2.69094	4.96249	5e-05	0.000280515	yes
ETF1P2	par72	vir_par72	OK	1.57484	4.23424	1.4269	2.68868	1.53679	0.00055	0.00258647	yes
FUT3	par72	vir_par72	OK	0.620699	1.66852	1.4266	2.68812	1.11131	0.0002	0.00102556	yes
HBEGF	par72	vir_par72	OK	10.3538	27.8308	1.42652	2.68798	4.12048	5e-05	0.000280515	yes
NPIPB4	par72	vir_par72	OK	4.28723	11.5207	1.42611	2.68721	1.65818	5e-05	0.000280515	yes
CLIP2	par72	vir_par72	OK	10.3306	27.7599	1.42607	2.68714	1.8124	5e-05	0.000280515	yes
ARL8B	par72	vir_par72	OK	38.0482	102.214	1.42569	2.68643	4.85224	5e-05	0.000280515	yes
SAR1P1	par72	vir_par72	OK	2.51645	6.75836	1.42528	2.68567	2.12331	5e-05	0.000280515	yes
TMED2	par72	vir_par72	OK	130.464	349.919	1.42337	2.68211	4.91926	5e-05	0.000280515	yes
KIRREL	par72	vir_par72	OK	8.97896	24.0658	1.42237	2.68025	4.51143	5e-05	0.000280515	yes
PAIP2	par72	vir_par72	OK	67.9191	182.004	1.42208	2.67972	4.33839	5e-05	0.000280515	yes
CYP3A5	par72	vir_par72	OK	2.67967	7.18012	1.42195	2.67947	1.92412	5e-05	0.000280515	yes
CEP95	par72	vir_par72	OK	20.3932	54.6388	1.42184	2.67927	0.838846	0.0003	0.00148912	yes
DDX55	par72	vir_par72	OK	11.5396	30.9125	1.4216	2.67882	2.56223	5e-05	0.000280515	yes
ITPRIP	par72	vir_par72	OK	0.789603	2.11514	1.42156	2.67875	2.69518	5e-05	0.000280515	yes
RIPK1	par72	vir_par72	OK	9.46856	25.3524	1.4209	2.67752	4.42457	5e-05	0.000280515	yes
TAF9	par72	vir_par72	OK	88.9631	238.064	1.42007	2.67598	3.91005	5e-05	0.000280515	yes
SPATS2	par72	vir_par72	OK	18.9917	50.8064	1.41964	2.67519	3.3599	5e-05	0.000280515	yes
LRP12	par72	vir_par72	OK	18.9923	50.7652	1.41843	2.67294	3.59065	5e-05	0.000280515	yes
CCT6P1	par72	vir_par72	OK	2.03312	5.43352	1.4182	2.67252	1.85339	5e-05	0.000280515	yes
DUSP12	par72	vir_par72	OK	13.5579	36.2223	1.41774	2.67167	3.70136	5e-05	0.000280515	yes
PLAGL2	par72	vir_par72	OK	11.8843	31.7507	1.41773	2.67165	4.69779	5e-05	0.000280515	yes
CRK	par72	vir_par72	OK	56.2658	150.052	1.41513	2.66684	4.95729	5e-05	0.000280515	yes
TRAM1	par72	vir_par72	OK	110.831	295.458	1.4146	2.66586	4.55715	5e-05	0.000280515	yes
FOXRED1	par72	vir_par72	OK	9.0873	24.2194	1.41424	2.66519	0.78127	0.0037	0.0143048	yes
PRPF38A	par72	vir_par72	OK	34.8794	92.9563	1.41418	2.66508	2.21674	5e-05	0.000280515	yes
GYG1P3	par72	vir_par72	OK	0.69236	1.84471	1.4138	2.66438	1.80957	0.00015	0.000786087	yes
TEF	par72	vir_par72	OK	12.3188	32.8196	1.41369	2.66418	4.57383	5e-05	0.000280515	yes
RP1-239B22.5	par72	vir_par72	OK	1.27152	3.38641	1.4132	2.66327	2.88352	5e-05	0.000280515	yes
RP11-296I10.6	par72	vir_par72	OK	2.43062	6.46903	1.41223	2.66148	2.1267	5e-05	0.000280515	yes
SCYL1	par72	vir_par72	OK	8.79909	23.4138	1.41193	2.66093	3.56741	5e-05	0.000280515	yes
EPSTI1	par72	vir_par72	OK	0.608592	1.61938	1.4119	2.66087	1.22983	5e-05	0.000280515	yes
URB2	par72	vir_par72	OK	5.90273	15.6982	1.41114	2.65947	3.84556	5e-05	0.000280515	yes
RNF11	par72	vir_par72	OK	74.7518	198.761	1.41086	2.65896	4.35649	5e-05	0.000280515	yes
PRDM1	par72	vir_par72	OK	3.21215	8.537	1.41019	2.65772	1.66073	0.0001	0.000538822	yes
GZF1	par72	vir_par72	OK	8.0052	21.2717	1.40993	2.65724	3.88816	5e-05	0.000280515	yes
RELA	par72	vir_par72	OK	18.3821	48.8399	1.40976	2.65693	3.42729	5e-05	0.000280515	yes
DNAJA2	par72	vir_par72	OK	45.3707	120.502	1.40922	2.65594	4.83467	5e-05	0.000280515	yes
SDCBP	par72	vir_par72	OK	123.626	327.834	1.40699	2.65183	4.10186	5e-05	0.000280515	yes
ZUFSP	par72	vir_par72	OK	6.93838	18.3973	1.40682	2.65152	3.52601	5e-05	0.000280515	yes
TEX10	par72	vir_par72	OK	17.2005	45.5929	1.40636	2.65068	4.14587	5e-05	0.000280515	yes
DHX34	par72	vir_par72	OK	2.99719	7.94429	1.40631	2.65058	3.40674	5e-05	0.000280515	yes
C8orf76	par72	vir_par72	OK	8.92774	23.6636	1.4063	2.65057	1.57257	0.0001	0.000538822	yes
RRN3	par72	vir_par72	OK	27.6015	73.0972	1.40507	2.64831	3.21302	5e-05	0.000280515	yes
CBWD6	par72	vir_par72	OK	0.99972	2.64588	1.40415	2.64662	1.97883	5e-05	0.000280515	yes
FAM220A	par72	vir_par72	OK	9.09979	24.0678	1.4032	2.64488	3.2875	5e-05	0.000280515	yes
CEACAM19	par72	vir_par72	OK	4.04295	10.691	1.40292	2.64436	1.16672	0.01405	0.0457003	yes
HARBI1	par72	vir_par72	OK	6.98999	18.4802	1.40262	2.64381	1.5191	5e-05	0.000280515	yes
CYTH3	par72	vir_par72	OK	7.95601	21.0206	1.40169	2.64211	3.77344	5e-05	0.000280515	yes
ZSCAN22	par72	vir_par72	OK	2.65378	7.00948	1.40126	2.64132	3.59973	5e-05	0.000280515	yes
ECM1	par72	vir_par72	OK	1.00626	2.65595	1.40022	2.63942	1.93558	5e-05	0.000280515	yes
TMEM208	par72	vir_par72	OK	57.5089	151.738	1.39972	2.6385	4.22912	5e-05	0.000280515	yes
ZCCHC6	par72	vir_par72	OK	9.55092	25.1955	1.39946	2.63803	3.29065	5e-05	0.000280515	yes
METTL22	par72	vir_par72	OK	6.43903	16.9641	1.39757	2.63457	2.29704	5e-05	0.000280515	yes
ZNF697	par72	vir_par72	OK	6.86103	18.0747	1.39747	2.63439	4.28317	5e-05	0.000280515	yes
HSP90AA1	par72	vir_par72	OK	195.59	515.2	1.3973	2.63408	2.61989	5e-05	0.000280515	yes
PPARD	par72	vir_par72	OK	7.20344	18.9614	1.39631	2.63227	3.99328	5e-05	0.000280515	yes
CDKL5	par72	vir_par72	OK	2.98398	7.84957	1.39538	2.63058	3.58175	5e-05	0.000280515	yes
BTRC	par72	vir_par72	OK	20.4103	53.6759	1.39498	2.62985	1.99358	5e-05	0.000280515	yes
MEPCE	par72	vir_par72	OK	12.9287	33.9936	1.39468	2.6293	3.5386	5e-05	0.000280515	yes
YAF2	par72	vir_par72	OK	8.82109	23.1915	1.39456	2.62908	2.96354	5e-05	0.000280515	yes
CHST7	par72	vir_par72	OK	0.84414	2.21786	1.39362	2.62737	2.38944	5e-05	0.000280515	yes
MVD	par72	vir_par72	OK	22.1478	58.1827	1.39343	2.62703	2.65453	5e-05	0.000280515	yes
SLC15A2	par72	vir_par72	OK	0.788881	2.0709	1.39238	2.62511	1.08444	5e-05	0.000280515	yes
CCDC41	par72	vir_par72	OK	8.83426	23.1667	1.39087	2.62237	2.40658	5e-05	0.000280515	yes
CTD-2369P2.2	par72	vir_par72	OK	4.07024	10.6667	1.38993	2.62066	1.50355	0.001	0.00444512	yes
ARRDC4	par72	vir_par72	OK	60.1995	157.631	1.38873	2.61848	4.70591	5e-05	0.000280515	yes
N4BP1	par72	vir_par72	OK	16.8558	44.11	1.38786	2.6169	2.7347	5e-05	0.000280515	yes
BAK1	par72	vir_par72	OK	12.6071	32.9861	1.38762	2.61647	4.04955	5e-05	0.000280515	yes
TVP23C,TVP23C-CDRT4	par72	vir_par72	OK	4.9812	13.0326	1.38756	2.61636	1.29903	0.00225	0.00920323	yes
CRY2	par72	vir_par72	OK	7.44031	19.4656	1.38749	2.61623	3.24672	5e-05	0.000280515	yes
C12orf29	par72	vir_par72	OK	12.6577	33.101	1.38686	2.61509	2.45582	5e-05	0.000280515	yes
GTF2H1	par72	vir_par72	OK	24.2979	63.5296	1.3866	2.61462	3.6054	5e-05	0.000280515	yes
LINC00969	par72	vir_par72	OK	9.17916	23.9994	1.38657	2.61456	1.87471	5e-05	0.000280515	yes
MAP2K4	par72	vir_par72	OK	17.3215	45.2662	1.38587	2.6133	3.68849	5e-05	0.000280515	yes
ZNF799	par72	vir_par72	OK	2.51185	6.56116	1.3852	2.61208	1.22499	0.00625	0.0226866	yes
FBXW7	par72	vir_par72	OK	17.5554	45.8387	1.38465	2.61109	3.17659	5e-05	0.000280515	yes
IFNLR1	par72	vir_par72	OK	8.13346	21.214	1.38307	2.60823	3.7746	5e-05	0.000280515	yes
UBC	par72	vir_par72	OK	606.888	1581.99	1.38224	2.60673	2.42159	5e-05	0.000280515	yes
FHL2	par72	vir_par72	OK	77.0537	200.843	1.38213	2.60653	4.46277	5e-05	0.000280515	yes
FOXO3	par72	vir_par72	OK	9.13388	23.797	1.38148	2.60536	4.64545	5e-05	0.000280515	yes
PHF5A	par72	vir_par72	OK	45.9191	119.515	1.38003	2.60274	4.32531	5e-05	0.000280515	yes
INTS12	par72	vir_par72	OK	22.4748	58.4851	1.37976	2.60225	2.82256	5e-05	0.000280515	yes
FGF19	par72	vir_par72	OK	3.39086	8.8183	1.37885	2.60061	3.16152	5e-05	0.000280515	yes
HSD17B7	par72	vir_par72	OK	8.58593	22.3243	1.37857	2.60011	2.88265	5e-05	0.000280515	yes
KDM2A	par72	vir_par72	OK	31.0025	80.5968	1.37834	2.59969	3.93797	5e-05	0.000280515	yes
ETF1	par72	vir_par72	OK	89.6494	233.033	1.37817	2.59938	4.34027	5e-05	0.000280515	yes
DNAJA4	par72	vir_par72	OK	15.6847	40.7279	1.37666	2.59667	2.87963	5e-05	0.000280515	yes
SORBS1	par72	vir_par72	OK	1.86202	4.83453	1.37651	2.5964	2.11636	5e-05	0.000280515	yes
RP11-642P15.1	par72	vir_par72	OK	1.18373	3.07137	1.37555	2.59467	0.118816	0.0096	0.0329252	yes
ZCCHC10	par72	vir_par72	OK	28.2437	73.1986	1.37389	2.59168	2.90561	5e-05	0.000280515	yes
MAP4K3	par72	vir_par72	OK	17.9046	46.3985	1.37375	2.59143	2.6569	5e-05	0.000280515	yes
GPN1	par72	vir_par72	OK	30.2071	78.2756	1.37367	2.59129	2.42805	5e-05	0.000280515	yes
YKT6	par72	vir_par72	OK	53.0657	137.479	1.37336	2.59073	3.84255	5e-05	0.000280515	yes
AAR2	par72	vir_par72	OK	11.0558	28.6296	1.37271	2.58957	4.01444	5e-05	0.000280515	yes
RP11-795H16.2	par72	vir_par72	OK	0.637991	1.65175	1.37239	2.58899	2.14459	5e-05	0.000280515	yes
KDM4C	par72	vir_par72	OK	14.945	38.6792	1.3719	2.58811	2.60058	5e-05	0.000280515	yes
DCTN5	par72	vir_par72	OK	44.6495	115.527	1.37152	2.58743	3.42257	5e-05	0.000280515	yes
ZFAND5	par72	vir_par72	OK	43.8425	113.403	1.37106	2.58661	4.45634	5e-05	0.000280515	yes
VPS37A	par72	vir_par72	OK	16.4471	42.5387	1.37094	2.58639	1.83305	5e-05	0.000280515	yes
ALS2	par72	vir_par72	OK	20.464	52.8956	1.37006	2.58481	2.77627	5e-05	0.000280515	yes
RPS6KA5	par72	vir_par72	OK	10.0017	25.8485	1.36984	2.58442	2.85343	5e-05	0.000280515	yes
P4HB	par72	vir_par72	OK	263.899	681.584	1.36891	2.58275	2.54329	5e-05	0.000280515	yes
SIPA1L2	par72	vir_par72	OK	1.45987	3.76972	1.36862	2.58223	1.88309	5e-05	0.000280515	yes
SPAG1	par72	vir_par72	OK	4.06708	10.4975	1.36798	2.58109	1.6618	5e-05	0.000280515	yes
PCCA	par72	vir_par72	OK	35.171	90.7599	1.36767	2.58053	2.15179	5e-05	0.000280515	yes
SAT2	par72	vir_par72	OK	26.1074	67.3691	1.36763	2.58046	0.996113	0.00385	0.014814	yes
C20orf24	par72	vir_par72	OK	34.8896	89.9657	1.36658	2.57859	2.28805	5e-05	0.000280515	yes
GCNT3	par72	vir_par72	OK	14.4023	37.1338	1.36644	2.57834	2.18035	5e-05	0.000280515	yes
PRMT5	par72	vir_par72	OK	99.2882	255.969	1.36628	2.57805	3.39546	5e-05	0.000280515	yes
RASAL2	par72	vir_par72	OK	4.70854	12.1339	1.36569	2.577	1.66843	5e-05	0.000280515	yes
NUMBL	par72	vir_par72	OK	4.10865	10.5851	1.3653	2.5763	3.08396	5e-05	0.000280515	yes
COX10	par72	vir_par72	OK	14.955	38.5232	1.3651	2.57594	3.37057	5e-05	0.000280515	yes
NEU1	par72	vir_par72	OK	19.3325	49.7696	1.36424	2.57441	3.97678	5e-05	0.000280515	yes
INO80	par72	vir_par72	OK	13.8497	35.6103	1.36244	2.5712	2.55251	5e-05	0.000280515	yes
UBE2O	par72	vir_par72	OK	10.2321	26.3054	1.36225	2.57086	2.28753	5e-05	0.000280515	yes
MRPS10	par72	vir_par72	OK	24.3223	62.5087	1.36178	2.57002	4.39446	5e-05	0.000280515	yes
CCRL2	par72	vir_par72	OK	2.53234	6.50786	1.36171	2.5699	2.37724	5e-05	0.000280515	yes
HBS1L	par72	vir_par72	OK	88.8936	228.273	1.36061	2.56794	3.04287	5e-05	0.000280515	yes
PDE4B	par72	vir_par72	OK	0.744344	1.9105	1.35991	2.56669	1.25944	5e-05	0.000280515	yes
FNTA	par72	vir_par72	OK	19.6162	50.3225	1.35916	2.56536	2.12065	5e-05	0.000280515	yes
FBXL12	par72	vir_par72	OK	7.34431	18.8374	1.3589	2.5649	3.09856	5e-05	0.000280515	yes
UBN1	par72	vir_par72	OK	15.4994	39.7401	1.35838	2.56397	2.59308	5e-05	0.000280515	yes
C1GALT1	par72	vir_par72	OK	20.2039	51.8004	1.35833	2.56388	3.21076	5e-05	0.000280515	yes
SLC3A2	par72	vir_par72	OK	308.905	791.787	1.35795	2.56321	3.72506	5e-05	0.000280515	yes
PSMD3	par72	vir_par72	OK	32.6058	83.5441	1.35741	2.56225	4.33165	5e-05	0.000280515	yes
STX5	par72	vir_par72	OK	24.8685	63.6953	1.35686	2.56127	4.19656	5e-05	0.000280515	yes
ZNF136	par72	vir_par72	OK	12.5701	32.1841	1.35635	2.56037	2.00843	5e-05	0.000280515	yes
AKIRIN1	par72	vir_par72	OK	43.2679	110.758	1.35604	2.55982	4.04782	5e-05	0.000280515	yes
LINC00324	par72	vir_par72	OK	0.444174	1.13629	1.35513	2.5582	2.0446	5e-05	0.000280515	yes
SGK3	par72	vir_par72	OK	4.72583	12.0814	1.35414	2.55645	2.16924	5e-05	0.000280515	yes
RIOK2	par72	vir_par72	OK	17.6094	45.0151	1.35407	2.55632	4.00195	5e-05	0.000280515	yes
STARD13	par72	vir_par72	OK	6.99382	17.8746	1.35376	2.55577	2.10151	5e-05	0.000280515	yes
RAB24	par72	vir_par72	OK	6.50265	16.6052	1.35253	2.5536	2.33638	5e-05	0.000280515	yes
ZNF554	par72	vir_par72	OK	3.95872	10.0967	1.35077	2.55048	3.48375	5e-05	0.000280515	yes
FAM96B	par72	vir_par72	OK	24.1163	61.4658	1.34978	2.54873	3.48707	5e-05	0.000280515	yes
MAST4	par72	vir_par72	OK	3.74772	9.54927	1.34938	2.54803	1.45914	5e-05	0.000280515	yes
EAPP	par72	vir_par72	OK	40.8177	103.969	1.34889	2.54716	4.46112	5e-05	0.000280515	yes
PBX4	par72	vir_par72	OK	1.72612	4.39605	1.34868	2.54679	1.49185	0.0002	0.00102556	yes
LSM1	par72	vir_par72	OK	19.717	50.1935	1.34806	2.5457	2.00756	5e-05	0.000280515	yes
LSM10	par72	vir_par72	OK	8.44071	21.4735	1.34712	2.54404	2.96425	5e-05	0.000280515	yes
IRF6	par72	vir_par72	OK	35.7942	91.0547	1.34701	2.54384	4.48666	5e-05	0.000280515	yes
RPP38	par72	vir_par72	OK	14.1733	36.0501	1.34683	2.54353	2.20896	5e-05	0.000280515	yes
STAG3L5P-PVRIG2P-PILRB	par72	vir_par72	OK	4.06494	10.3359	1.34636	2.5427	1.79081	0.0002	0.00102556	yes
LUZP1	par72	vir_par72	OK	13.5226	34.3791	1.34616	2.54235	2.50558	5e-05	0.000280515	yes
RP1-273G13.2	par72	vir_par72	OK	46.9182	119.226	1.34547	2.54113	2.94474	5e-05	0.000280515	yes
SEC24A	par72	vir_par72	OK	19.4095	49.2875	1.34446	2.53935	3.01833	5e-05	0.000280515	yes
RRP8	par72	vir_par72	OK	6.30818	16.0113	1.34379	2.53817	2.5393	5e-05	0.000280515	yes
FAM210A	par72	vir_par72	OK	9.55982	24.2556	1.34326	2.53724	1.71833	5e-05	0.000280515	yes
DDIT3	par72	vir_par72	OK	191.236	485.205	1.34324	2.5372	2.51316	5e-05	0.000280515	yes
B4GALT3	par72	vir_par72	OK	41.9039	106.198	1.3416	2.53432	3.12701	5e-05	0.000280515	yes
JUND	par72	vir_par72	OK	53.5107	135.609	1.34155	2.53423	4.74332	5e-05	0.000280515	yes
COPB1	par72	vir_par72	OK	83.6013	211.746	1.34074	2.53281	3.2989	5e-05	0.000280515	yes
OSTC	par72	vir_par72	OK	173.922	440.397	1.34037	2.53216	3.10981	5e-05	0.000280515	yes
ZNF131	par72	vir_par72	OK	23.0802	58.4421	1.34035	2.53213	3.03499	5e-05	0.000280515	yes
SH3TC1	par72	vir_par72	OK	3.68813	9.33766	1.34017	2.53181	1.69791	5e-05	0.000280515	yes
ZNF503	par72	vir_par72	OK	1.97886	5.00921	1.33991	2.53136	2.74007	5e-05	0.000280515	yes
ITGAX	par72	vir_par72	OK	9.84622	24.9169	1.33948	2.5306	1.89811	5e-05	0.000280515	yes
NADK	par72	vir_par72	OK	18.107	45.8183	1.33938	2.53043	2.89025	5e-05	0.000280515	yes
TEC	par72	vir_par72	OK	3.50453	8.8611	1.33826	2.52846	2.67421	5e-05	0.000280515	yes
CYCS	par72	vir_par72	OK	74.9021	189.052	1.33571	2.524	3.65938	5e-05	0.000280515	yes
STON2	par72	vir_par72	OK	3.20854	8.0898	1.33419	2.52134	1.9018	5e-05	0.000280515	yes
RRP12	par72	vir_par72	OK	12.9628	32.6656	1.33339	2.51994	3.90635	5e-05	0.000280515	yes
SIN3B	par72	vir_par72	OK	8.95645	22.5686	1.33332	2.51982	2.41749	5e-05	0.000280515	yes
RHOB	par72	vir_par72	OK	76.7548	193.353	1.33291	2.5191	4.63012	5e-05	0.000280515	yes
AC005562.1	par72	vir_par72	OK	6.80159	17.1314	1.3327	2.51874	2.10966	5e-05	0.000280515	yes
FAM135A	par72	vir_par72	OK	21.0521	53.0182	1.33253	2.51844	2.86196	5e-05	0.000280515	yes
STAMBP	par72	vir_par72	OK	30.1772	75.9869	1.33229	2.51802	3.1117	5e-05	0.000280515	yes
PSMD10	par72	vir_par72	OK	31.7606	79.9658	1.33214	2.51776	3.93834	5e-05	0.000280515	yes
WSB1	par72	vir_par72	OK	26.6316	67.0379	1.33184	2.51724	4.00846	5e-05	0.000280515	yes
DAPP1	par72	vir_par72	OK	0.683057	1.71928	1.33173	2.51704	2.02877	5e-05	0.000280515	yes
AGFG1	par72	vir_par72	OK	34.922	87.8969	1.33168	2.51696	2.86054	5e-05	0.000280515	yes
KCNK1	par72	vir_par72	OK	8.85434	22.268	1.33052	2.51493	2.59122	5e-05	0.000280515	yes
ATP8B3	par72	vir_par72	OK	1.66018	4.16939	1.3285	2.51141	2.17146	5e-05	0.000280515	yes
RAE1	par72	vir_par72	OK	31.4992	79.1001	1.32837	2.51119	4.08704	5e-05	0.000280515	yes
44262	par72	vir_par72	OK	62.4134	156.682	1.32791	2.51039	3.32434	5e-05	0.000280515	yes
SGTA	par72	vir_par72	OK	14.31	35.8876	1.32646	2.50787	3.18077	5e-05	0.000280515	yes
AIMP1	par72	vir_par72	OK	29.1322	73.0569	1.32641	2.50778	3.89664	5e-05	0.000280515	yes
NCK1	par72	vir_par72	OK	30.6129	76.751	1.32605	2.50715	3.30175	5e-05	0.000280515	yes
GYG1	par72	vir_par72	OK	26.3948	66.163	1.32577	2.50667	3.30111	5e-05	0.000280515	yes
SENP2	par72	vir_par72	OK	35.5164	89.0262	1.32574	2.50661	3.09635	5e-05	0.000280515	yes
ATP2A2	par72	vir_par72	OK	108.173	270.993	1.32491	2.50517	3.92346	5e-05	0.000280515	yes
PVR	par72	vir_par72	OK	17.894	44.8225	1.32475	2.50489	3.73248	5e-05	0.000280515	yes
RP11-553L6.5	par72	vir_par72	OK	2.17638	5.45006	1.32434	2.50418	2.51718	5e-05	0.000280515	yes
BRPF1	par72	vir_par72	OK	4.30195	10.7642	1.32319	2.50219	2.66487	5e-05	0.000280515	yes
TMEM165	par72	vir_par72	OK	51.4232	128.667	1.32316	2.50214	2.46941	5e-05	0.000280515	yes
PIKFYVE	par72	vir_par72	OK	12.9304	32.3391	1.32252	2.50103	3.87949	5e-05	0.000280515	yes
TDPX2	par72	vir_par72	OK	2.43688	6.09256	1.32201	2.50014	2.00618	5e-05	0.000280515	yes
ARHGAP12	par72	vir_par72	OK	24.2938	60.7237	1.32167	2.49955	3.55154	5e-05	0.000280515	yes
MBP	par72	vir_par72	OK	24.7277	61.8065	1.32163	2.49948	4.23402	5e-05	0.000280515	yes
NR1D2	par72	vir_par72	OK	48.0971	120.193	1.32133	2.49896	1.83407	5e-05	0.000280515	yes
PRSS3	par72	vir_par72	OK	19.1568	47.81	1.31946	2.49573	0.99277	0.002	0.00828258	yes
SETD4	par72	vir_par72	OK	10.5556	26.3417	1.31934	2.49552	1.74322	0.00045	0.00215616	yes
CDRT4	par72	vir_par72	OK	7.48609	18.6757	1.31888	2.49472	1.67219	0.00085	0.0038374	yes
CTC-444N24.11	par72	vir_par72	OK	12.6238	31.4914	1.31881	2.4946	4.12254	5e-05	0.000280515	yes
ZNF436	par72	vir_par72	OK	7.55485	18.8403	1.31834	2.49379	4.01201	5e-05	0.000280515	yes
HSP90AA6P	par72	vir_par72	OK	2.84977	7.09685	1.31633	2.49032	2.3042	5e-05	0.000280515	yes
FAM118A	par72	vir_par72	OK	10.6576	26.5373	1.31613	2.48997	2.63289	5e-05	0.000280515	yes
ZNF622	par72	vir_par72	OK	8.0932	20.1512	1.31609	2.4899	3.60941	5e-05	0.000280515	yes
RNMTL1	par72	vir_par72	OK	5.34944	13.3077	1.3148	2.48768	0.948432	0.0046	0.0173339	yes
ARPC5L	par72	vir_par72	OK	11.7392	29.1991	1.31459	2.48732	3.58834	5e-05	0.000280515	yes
TOLLIP	par72	vir_par72	OK	9.21753	22.9171	1.31397	2.48625	3.79427	5e-05	0.000280515	yes
USO1	par72	vir_par72	OK	346.471	861.344	1.31385	2.48604	1.57435	0.0001	0.000538822	yes
ANXA5	par72	vir_par72	OK	77.7093	193.166	1.31368	2.48575	4.51266	5e-05	0.000280515	yes
SOS2	par72	vir_par72	OK	7.78074	19.3399	1.3136	2.48561	3.53954	5e-05	0.000280515	yes
CDC14A	par72	vir_par72	OK	6.38813	15.871	1.31293	2.48446	2.90796	5e-05	0.000280515	yes
CTD-2083E4.5	par72	vir_par72	OK	3.22859	8.01722	1.3122	2.4832	1.1413	0.0113	0.0379355	yes
GPN2	par72	vir_par72	OK	8.50038	21.1058	1.31204	2.48292	2.54182	5e-05	0.000280515	yes
HAUS2	par72	vir_par72	OK	21.4412	53.232	1.31191	2.4827	3.04722	5e-05	0.000280515	yes
RP11-651P23.4	par72	vir_par72	OK	13.0419	32.3621	1.31115	2.48139	1.52861	0.0014	0.00601694	yes
THAP3	par72	vir_par72	OK	3.25003	8.05855	1.31007	2.47954	0.977347	0.0084	0.0293509	yes
NOL6	par72	vir_par72	OK	9.95283	24.6776	1.31002	2.47945	3.43094	5e-05	0.000280515	yes
RNF122	par72	vir_par72	OK	2.38108	5.9025	1.30971	2.47892	2.69494	5e-05	0.000280515	yes
ST6GALNAC4	par72	vir_par72	OK	3.07498	7.61931	1.30908	2.47783	2.36674	5e-05	0.000280515	yes
CEBPZ	par72	vir_par72	OK	33.9858	84.2048	1.30897	2.47765	3.32713	5e-05	0.000280515	yes
TRIP11	par72	vir_par72	OK	13.0681	32.3755	1.30886	2.47746	4.16022	5e-05	0.000280515	yes
ZNF17	par72	vir_par72	OK	2.71262	6.71502	1.30771	2.47548	1.00305	0.00025	0.00125904	yes
TRIM39	par72	vir_par72	OK	8.27986	20.4953	1.30762	2.47533	2.11928	5e-05	0.000280515	yes
DMRTA2	par72	vir_par72	OK	0.914693	2.26355	1.30723	2.47466	2.31133	5e-05	0.000280515	yes
ZBTB40	par72	vir_par72	OK	7.7683	19.2219	1.30708	2.4744	4.39897	5e-05	0.000280515	yes
NUP214	par72	vir_par72	OK	13.3206	32.9596	1.30704	2.47433	2.05019	5e-05	0.000280515	yes
AC007041.2	par72	vir_par72	OK	2.96704	7.33589	1.30595	2.47246	2.56522	5e-05	0.000280515	yes
NR6A1	par72	vir_par72	OK	2.9109	7.19314	1.30516	2.47111	3.56368	5e-05	0.000280515	yes
HERC2P9	par72	vir_par72	OK	1.14263	2.82343	1.30508	2.47097	1.95213	5e-05	0.000280515	yes
GORASP2	par72	vir_par72	OK	49.821	123.001	1.30385	2.46887	3.85209	5e-05	0.000280515	yes
MAP2K4P1	par72	vir_par72	OK	3.09762	7.64266	1.30292	2.46728	2.60662	5e-05	0.000280515	yes
SSH1	par72	vir_par72	OK	8.44016	20.8185	1.30252	2.46659	3.54947	5e-05	0.000280515	yes
IKZF5	par72	vir_par72	OK	14.1566	34.9094	1.30214	2.46594	2.69334	5e-05	0.000280515	yes
HSP90AA4P	par72	vir_par72	OK	1.94415	4.79173	1.30141	2.4647	2.2749	5e-05	0.000280515	yes
SLC11A2	par72	vir_par72	OK	28.7893	70.9329	1.30092	2.46386	2.71229	5e-05	0.000280515	yes
DDA1	par72	vir_par72	OK	7.75742	19.0952	1.29956	2.46154	2.06131	5e-05	0.000280515	yes
TARSL2	par72	vir_par72	OK	5.55283	13.667	1.2994	2.46127	3.10261	5e-05	0.000280515	yes
FAM13B	par72	vir_par72	OK	9.37153	23.0594	1.299	2.46058	2.53778	5e-05	0.000280515	yes
AIM1L	par72	vir_par72	OK	9.62769	23.6779	1.29828	2.45936	2.45218	5e-05	0.000280515	yes
UBR4	par72	vir_par72	OK	24.8349	61.0687	1.29807	2.459	1.74654	5e-05	0.000280515	yes
WDR43	par72	vir_par72	OK	41.5532	102.109	1.29708	2.45731	3.84794	5e-05	0.000280515	yes
BAG3	par72	vir_par72	OK	11.1742	27.431	1.29564	2.45486	3.89142	5e-05	0.000280515	yes
RP3-437C15.1	par72	vir_par72	OK	39.8779	97.868	1.29525	2.4542	3.13929	5e-05	0.000280515	yes
ACVR1	par72	vir_par72	OK	13.291	32.6113	1.29492	2.45363	3.095	5e-05	0.000280515	yes
HDLBP	par72	vir_par72	OK	317.153	778.163	1.29489	2.45358	1.51263	5e-05	0.000280515	yes
MAP3K9	par72	vir_par72	OK	6.33	15.5294	1.29472	2.45329	3.9023	5e-05	0.000280515	yes
ATG4A	par72	vir_par72	OK	8.36667	20.5254	1.29468	2.45323	3.22758	5e-05	0.000280515	yes
CYTH1	par72	vir_par72	OK	37.2195	91.289	1.29438	2.45272	3.42225	5e-05	0.000280515	yes
OPTN	par72	vir_par72	OK	27.6112	67.7203	1.29433	2.45263	3.78212	5e-05	0.000280515	yes
PSMD12P	par72	vir_par72	OK	1.58485	3.8862	1.29401	2.45209	2.33933	5e-05	0.000280515	yes
SH3BP5	par72	vir_par72	OK	15.0954	37.0109	1.29384	2.4518	3.61997	5e-05	0.000280515	yes
TBPL1	par72	vir_par72	OK	19.3304	47.3326	1.29197	2.44862	2.31	5e-05	0.000280515	yes
PRKAB2	par72	vir_par72	OK	17.4403	42.6959	1.29167	2.44811	3.90741	5e-05	0.000280515	yes
ANKRD40	par72	vir_par72	OK	24.3823	59.6805	1.29142	2.44769	4.31674	5e-05	0.000280515	yes
ZNF767	par72	vir_par72	OK	2.14703	5.25517	1.2914	2.44765	1.49307	5e-05	0.000280515	yes
RP11-63E5.6	par72	vir_par72	OK	0.561273	1.37306	1.29062	2.44633	1.42648	0.0016	0.00678703	yes
CUTC	par72	vir_par72	OK	12.3838	30.2758	1.28972	2.44481	1.56341	0.00065	0.00300853	yes
BLZF1	par72	vir_par72	OK	23.2155	56.7539	1.28963	2.44465	3.28454	5e-05	0.000280515	yes
FASTKD5	par72	vir_par72	OK	10.1648	24.8492	1.28962	2.44464	3.12094	5e-05	0.000280515	yes
AC142293.3	par72	vir_par72	OK	0.99652	2.4361	1.2896	2.4446	1.17213	0.00395	0.015156	yes
WTAP	par72	vir_par72	OK	27.7197	67.6969	1.28818	2.4422	1.53741	0.0002	0.00102556	yes
ZNF607	par72	vir_par72	OK	6.41647	15.6646	1.28765	2.4413	2.63143	5e-05	0.000280515	yes
GMEB2	par72	vir_par72	OK	2.77504	6.77451	1.28761	2.44123	3.15726	5e-05	0.000280515	yes
EDC3	par72	vir_par72	OK	25.3811	61.8386	1.28475	2.4364	2.79915	5e-05	0.000280515	yes
MKL1	par72	vir_par72	OK	4.87381	11.8647	1.28356	2.43439	1.27147	5e-05	0.000280515	yes
RNF103	par72	vir_par72	OK	26.0737	63.4603	1.28326	2.43388	1.67086	0.00065	0.00300853	yes
RP11-364B6.2	par72	vir_par72	OK	1.16985	2.84661	1.28293	2.43333	1.54622	0.0003	0.00148912	yes
CLINT1	par72	vir_par72	OK	36.0466	87.6942	1.28262	2.4328	2.67464	5e-05	0.000280515	yes
SWT1	par72	vir_par72	OK	4.19199	10.1941	1.28203	2.43181	1.61431	5e-05	0.000280515	yes
SEC22A	par72	vir_par72	OK	39.0539	94.918	1.28122	2.43044	2.50693	5e-05	0.000280515	yes
PPIB	par72	vir_par72	OK	333.287	809.855	1.2809	2.42991	3.02358	5e-05	0.000280515	yes
ASB6	par72	vir_par72	OK	3.55553	8.63717	1.28049	2.42921	2.94139	5e-05	0.000280515	yes
SNRPGP2	par72	vir_par72	OK	55.7286	135.329	1.27998	2.42836	2.31144	5e-05	0.000280515	yes
ZNF701	par72	vir_par72	OK	1.31377	3.18938	1.27957	2.42767	0.903589	0.0024	0.00974437	yes
SSFA2	par72	vir_par72	OK	47.1109	114.363	1.27948	2.42751	3.72328	5e-05	0.000280515	yes
SDF2	par72	vir_par72	OK	36.668	88.976	1.27889	2.42652	1.45861	0.00025	0.00125904	yes
CPSF7	par72	vir_par72	OK	73.0587	177.268	1.2788	2.42637	2.28728	5e-05	0.000280515	yes
UQCRFS1	par72	vir_par72	OK	38.6439	93.7488	1.27856	2.42597	4.11601	5e-05	0.000280515	yes
AVPI1	par72	vir_par72	OK	8.67854	21.0451	1.27796	2.42496	3.27616	5e-05	0.000280515	yes
KDELR3	par72	vir_par72	OK	42.9845	104.235	1.27795	2.42494	1.12512	0.00625	0.0226866	yes
LRRC37A2	par72	vir_par72	OK	0.432462	1.0479	1.27685	2.42309	1.96212	5e-05	0.000280515	yes
PSMD7	par72	vir_par72	OK	29.4639	71.3302	1.27556	2.42093	3.99934	5e-05	0.000280515	yes
PPIL4	par72	vir_par72	OK	29.8261	72.1991	1.2754	2.42066	4.35718	5e-05	0.000280515	yes
ZNF335	par72	vir_par72	OK	1.71455	4.15027	1.27537	2.42061	2.75124	5e-05	0.000280515	yes
PDP1	par72	vir_par72	OK	22.8931	55.372	1.27424	2.41871	4.15288	5e-05	0.000280515	yes
MX1	par72	vir_par72	OK	4.09286	9.8876	1.27251	2.41582	1.98316	5e-05	0.000280515	yes
RP11-761I4.3	par72	vir_par72	OK	3.83835	9.27032	1.27213	2.41518	1.58802	0.00025	0.00125904	yes
KCND1	par72	vir_par72	OK	0.592146	1.42889	1.27087	2.41307	1.73165	5e-05	0.000280515	yes
FTH1P16	par72	vir_par72	OK	36.7383	88.6319	1.27054	2.41252	1.27014	0.0038	0.0146441	yes
MPV17L2	par72	vir_par72	OK	4.48854	10.8163	1.26888	2.40974	2.4471	5e-05	0.000280515	yes
B3GNT2	par72	vir_par72	OK	20.8642	50.2668	1.26857	2.40923	4.09372	5e-05	0.000280515	yes
PPP1R14C	par72	vir_par72	OK	2.67218	6.43648	1.26825	2.40869	2.79273	5e-05	0.000280515	yes
CTC-444N24.9	par72	vir_par72	OK	19.0643	45.8836	1.26711	2.40679	2.41882	5e-05	0.000280515	yes
CA2	par72	vir_par72	OK	24.6037	59.2088	1.26694	2.40651	3.67784	5e-05	0.000280515	yes
CTU1	par72	vir_par72	OK	1.75403	4.21707	1.26556	2.40421	2.37017	5e-05	0.000280515	yes
GET4	par72	vir_par72	OK	6.99298	16.8108	1.26541	2.40396	0.718716	0.01415	0.0459747	yes
TRAF6	par72	vir_par72	OK	4.6006	11.0591	1.26534	2.40384	3.32499	5e-05	0.000280515	yes
GRPEL2	par72	vir_par72	OK	32.0691	77.0881	1.26532	2.40381	4.3176	5e-05	0.000280515	yes
TBP	par72	vir_par72	OK	14.5345	34.9313	1.26504	2.40334	3.26953	5e-05	0.000280515	yes
TAF11	par72	vir_par72	OK	15.1823	36.4417	1.2632	2.40028	1.54507	0.0003	0.00148912	yes
HIST1H2AC	par72	vir_par72	OK	5.77441	13.8563	1.2628	2.39961	2.90151	5e-05	0.000280515	yes
XRRA1	par72	vir_par72	OK	12.4375	29.815	1.26134	2.39718	1.55411	5e-05	0.000280515	yes
PWWP2A	par72	vir_par72	OK	9.38659	22.4817	1.26008	2.39509	1.22641	5e-05	0.000280515	yes
LNX2	par72	vir_par72	OK	27.5687	66.0132	1.25972	2.39449	4.41943	5e-05	0.000280515	yes
BLOC1S6	par72	vir_par72	OK	49.5722	118.69	1.2596	2.39429	2.83536	5e-05	0.000280515	yes
OFD1	par72	vir_par72	OK	6.32493	15.1405	1.25929	2.39378	2.59355	5e-05	0.000280515	yes
ZNF284	par72	vir_par72	OK	3.51924	8.4207	1.25868	2.39277	2.65433	5e-05	0.000280515	yes
STK19	par72	vir_par72	OK	5.87657	14.06	1.25855	2.39255	1.64286	0.0004	0.00193713	yes
PPP4R2	par72	vir_par72	OK	36.5703	87.4898	1.25844	2.39237	3.00554	5e-05	0.000280515	yes
SUPV3L1	par72	vir_par72	OK	18.9274	45.2678	1.25801	2.39166	3.81818	5e-05	0.000280515	yes
PSPHP1	par72	vir_par72	OK	19.1674	45.8349	1.25779	2.39129	2.03282	5e-05	0.000280515	yes
PPP4R1	par72	vir_par72	OK	27.0118	64.5883	1.25768	2.39111	2.79825	5e-05	0.000280515	yes
SETX	par72	vir_par72	OK	19.8008	47.3437	1.25762	2.39101	3.45563	5e-05	0.000280515	yes
RSPRY1	par72	vir_par72	OK	25.6948	61.3797	1.25629	2.38881	3.57721	5e-05	0.000280515	yes
AC093673.5	par72	vir_par72	OK	6.9311	16.5503	1.2557	2.38783	2.5585	5e-05	0.000280515	yes
CDK11B	par72	vir_par72	OK	8.51811	20.33	1.255	2.38667	1.33479	0.00425	0.0161628	yes
MMADHC	par72	vir_par72	OK	104.248	248.792	1.25491	2.38652	4.35049	5e-05	0.000280515	yes
THBS1	par72	vir_par72	OK	52.0136	124.002	1.2534	2.38403	2.68345	5e-05	0.000280515	yes
SRSF2	par72	vir_par72	OK	76.8896	183.288	1.25326	2.38379	3.04524	5e-05	0.000280515	yes
RP3-514P16.1	par72	vir_par72	OK	7.11129	16.9518	1.25326	2.38379	3.23387	5e-05	0.000280515	yes
SNHG16	par72	vir_par72	OK	82.7921	197.329	1.25304	2.38343	3.4136	5e-05	0.000280515	yes
DNAH12	par72	vir_par72	OK	0.455459	1.08531	1.25271	2.38289	0.846353	0.00505	0.0188233	yes
USP2	par72	vir_par72	OK	3.97797	9.47894	1.25269	2.38285	2.31739	5e-05	0.000280515	yes
CLCC1	par72	vir_par72	OK	18.4533	43.9589	1.25228	2.38218	2.82725	5e-05	0.000280515	yes
N4BP2	par72	vir_par72	OK	6.95779	16.5514	1.25025	2.37883	3.45382	5e-05	0.000280515	yes
NCOA7	par72	vir_par72	OK	36.9156	87.8129	1.2502	2.37874	2.79014	5e-05	0.000280515	yes
NAA35	par72	vir_par72	OK	23.0042	54.7141	1.25001	2.37843	4.04654	5e-05	0.000280515	yes
C16orf52	par72	vir_par72	OK	17.6399	41.941	1.24952	2.37762	2.52437	5e-05	0.000280515	yes
KDM6A	par72	vir_par72	OK	9.36741	22.2634	1.24895	2.37668	3.04672	5e-05	0.000280515	yes
CALR	par72	vir_par72	OK	311.294	739.755	1.24877	2.37639	3.83945	5e-05	0.000280515	yes
ELOVL6	par72	vir_par72	OK	21.8086	51.7974	1.24799	2.3751	1.42714	5e-05	0.000280515	yes
GRWD1	par72	vir_par72	OK	10.4079	24.6871	1.24608	2.37196	2.22669	5e-05	0.000280515	yes
ZNF343	par72	vir_par72	OK	6.04424	14.3312	1.24553	2.37106	1.02745	0.00295	0.011699	yes
DDX10	par72	vir_par72	OK	20.702	49.0553	1.24464	2.36959	1.79696	5e-05	0.000280515	yes
MALT1	par72	vir_par72	OK	9.10633	21.5664	1.24384	2.36828	3.45874	5e-05	0.000280515	yes
TRAPPC3	par72	vir_par72	OK	66.7408	157.81	1.24154	2.36451	4.12744	5e-05	0.000280515	yes
FAM47E-STBD1	par72	vir_par72	OK	7.81865	18.487	1.24152	2.36448	2.79963	5e-05	0.000280515	yes
SBDSP1	par72	vir_par72	OK	14.4025	34.0526	1.24145	2.36436	3.10078	5e-05	0.000280515	yes
WDR37	par72	vir_par72	OK	4.48855	10.609	1.24096	2.36356	3.1706	5e-05	0.000280515	yes
FMNL2	par72	vir_par72	OK	11.3245	26.7574	1.24049	2.36279	3.36601	5e-05	0.000280515	yes
BET1L	par72	vir_par72	OK	21.1542	49.9785	1.24036	2.36257	3.72843	5e-05	0.000280515	yes
ARL5B	par72	vir_par72	OK	30.9465	73.1063	1.24022	2.36235	4.34283	5e-05	0.000280515	yes
BLOC1S3	par72	vir_par72	OK	7.65723	18.0869	1.24005	2.36207	1.88048	5e-05	0.000280515	yes
ROCK1P1	par72	vir_par72	OK	2.51399	5.93675	1.23969	2.36148	1.5372	0.0001	0.000538822	yes
NBPF14	par72	vir_par72	OK	0.828902	1.95694	1.23932	2.36087	2.36517	5e-05	0.000280515	yes
IGHMBP2	par72	vir_par72	OK	5.00395	11.8133	1.23927	2.36079	1.54875	5e-05	0.000280515	yes
TTLL4	par72	vir_par72	OK	9.83012	23.1858	1.23796	2.35865	2.14596	5e-05	0.000280515	yes
CHKA	par72	vir_par72	OK	36.455	85.9534	1.23744	2.3578	3.30685	5e-05	0.000280515	yes
SDCBPP3	par72	vir_par72	OK	3.76743	8.88165	1.23725	2.35749	2.34844	5e-05	0.000280515	yes
CFLAR	par72	vir_par72	OK	25.0327	58.9548	1.23579	2.3551	1.92638	5e-05	0.000280515	yes
ZNF317	par72	vir_par72	OK	15.7607	37.1111	1.23552	2.35466	3.20616	5e-05	0.000280515	yes
RNF19B	par72	vir_par72	OK	16.0007	37.6373	1.23403	2.35223	3.88007	5e-05	0.000280515	yes
CKAP4	par72	vir_par72	OK	30.9	72.6833	1.23402	2.35222	3.97442	5e-05	0.000280515	yes
NAA16	par72	vir_par72	OK	11.0887	26.0751	1.23358	2.3515	2.62294	5e-05	0.000280515	yes
ADAM19	par72	vir_par72	OK	1.08863	2.55759	1.23227	2.34936	1.56465	0.0007	0.00321832	yes
AKAP13	par72	vir_par72	OK	17.7723	41.7344	1.23161	2.34829	1.78852	5e-05	0.000280515	yes
RNU11	par72	vir_par72	OK	65.7799	154.441	1.23134	2.34785	1.13854	0.00325	0.0127459	yes
PRKAG2	par72	vir_par72	OK	10.1366	23.7879	1.23066	2.34674	3.10214	5e-05	0.000280515	yes
AC069213.1	par72	vir_par72	OK	0.729207	1.71049	1.23001	2.34569	1.90047	5e-05	0.000280515	yes
RYBP	par72	vir_par72	OK	20.4105	47.8624	1.22958	2.34499	4.3237	5e-05	0.000280515	yes
PHOSPHO1	par72	vir_par72	OK	0.562928	1.32002	1.22954	2.34492	1.07211	0.00065	0.00300853	yes
NPLOC4	par72	vir_par72	OK	23.1048	54.1751	1.22944	2.34476	1.99896	5e-05	0.000280515	yes
STRIP2	par72	vir_par72	OK	1.44991	3.39885	1.22908	2.34417	2.56616	5e-05	0.000280515	yes
RP4-545K15.5	par72	vir_par72	OK	1.52704	3.57775	1.22831	2.34292	1.74024	5e-05	0.000280515	yes
PRPF3	par72	vir_par72	OK	26.5832	62.2784	1.22821	2.34276	3.41861	5e-05	0.000280515	yes
SMIM12	par72	vir_par72	OK	16.1344	37.7912	1.22791	2.34227	2.6806	5e-05	0.000280515	yes
OSBP	par72	vir_par72	OK	54.7115	128.145	1.22786	2.34219	3.82271	5e-05	0.000280515	yes
MRPS12	par72	vir_par72	OK	12.2545	28.6898	1.22723	2.34117	2.69956	5e-05	0.000280515	yes
PIBF1	par72	vir_par72	OK	27.1863	63.5664	1.22539	2.33819	1.90622	5e-05	0.000280515	yes
CLN8	par72	vir_par72	OK	17.3772	40.6216	1.22505	2.33764	1.95429	5e-05	0.000280515	yes
LTN1	par72	vir_par72	OK	13.3309	31.1542	1.22465	2.33699	2.74198	5e-05	0.000280515	yes
TRIM38	par72	vir_par72	OK	8.07038	18.8548	1.22423	2.33631	3.73007	5e-05	0.000280515	yes
RNF139	par72	vir_par72	OK	26.1418	61.0663	1.22402	2.33597	3.90458	5e-05	0.000280515	yes
FAM49B	par72	vir_par72	OK	40.2986	94.1333	1.22398	2.3359	3.65686	5e-05	0.000280515	yes
DDX10P2	par72	vir_par72	OK	0.892285	2.08388	1.22369	2.33543	2.35703	5e-05	0.000280515	yes
ALAS1	par72	vir_par72	OK	42.4609	99.147	1.22343	2.33501	4.10679	5e-05	0.000280515	yes
PHF20L1	par72	vir_par72	OK	17.5862	41.0512	1.22298	2.33428	3.18735	5e-05	0.000280515	yes
ZCCHC24	par72	vir_par72	OK	2.95409	6.8936	1.22254	2.33357	3.18352	5e-05	0.000280515	yes
NRD1	par72	vir_par72	OK	47.6687	111.235	1.22249	2.33349	2.58463	5e-05	0.000280515	yes
PTPN23	par72	vir_par72	OK	20.855	48.6378	1.22169	2.3322	1.03209	0.00305	0.0120459	yes
CLTC	par72	vir_par72	OK	141.982	331.052	1.22135	2.33165	2.83788	5e-05	0.000280515	yes
ZNRD1	par72	vir_par72	OK	35.5528	82.8484	1.22051	2.33029	2.52527	5e-05	0.000280515	yes
ZNF211	par72	vir_par72	OK	6.00109	13.9829	1.22037	2.33006	2.88753	5e-05	0.000280515	yes
ABCC1	par72	vir_par72	OK	18.4771	43.0517	1.22033	2.33	2.90662	5e-05	0.000280515	yes
TARS	par72	vir_par72	OK	265.498	618.607	1.22032	2.32998	2.90022	5e-05	0.000280515	yes
OCLN	par72	vir_par72	OK	47.3744	110.379	1.22029	2.32994	3.74539	5e-05	0.000280515	yes
RP6-145B8.3	par72	vir_par72	OK	6.30287	14.6828	1.22005	2.32955	3.17535	5e-05	0.000280515	yes
SCAF4	par72	vir_par72	OK	13.9407	32.4664	1.21965	2.3289	3.52107	5e-05	0.000280515	yes
TRAFD1	par72	vir_par72	OK	17.0583	39.7135	1.21916	2.32811	2.80054	5e-05	0.000280515	yes
SH3BP4	par72	vir_par72	OK	39.778	92.606	1.21914	2.32808	4.20249	5e-05	0.000280515	yes
ABHD17B	par72	vir_par72	OK	16.9065	39.3595	1.21913	2.32806	3.63899	5e-05	0.000280515	yes
AP1M1	par72	vir_par72	OK	4.28815	9.96881	1.21707	2.32474	1.99437	5e-05	0.000280515	yes
ZNF442	par72	vir_par72	OK	1.69223	3.93178	1.21626	2.32344	1.7532	0.0001	0.000538822	yes
SLC33A1	par72	vir_par72	OK	35.3785	82.1956	1.21619	2.32332	2.61763	5e-05	0.000280515	yes
ZNF189	par72	vir_par72	OK	10.0168	23.2714	1.21613	2.32323	3.71242	5e-05	0.000280515	yes
PSMC4	par72	vir_par72	OK	37.0384	86.0376	1.21595	2.32294	3.8281	5e-05	0.000280515	yes
MANBAL	par72	vir_par72	OK	40.2967	93.6061	1.21594	2.32292	3.78225	5e-05	0.000280515	yes
DESI2	par72	vir_par72	OK	52.8556	122.763	1.21574	2.3226	4.06969	5e-05	0.000280515	yes
MAP3K13	par72	vir_par72	OK	49.3843	114.628	1.21483	2.32113	1.37506	0.0007	0.00321832	yes
KIAA0895	par72	vir_par72	OK	8.95257	20.7772	1.21462	2.3208	2.01536	5e-05	0.000280515	yes
TAP1	par72	vir_par72	OK	19.5356	45.3376	1.2146	2.32076	2.84071	5e-05	0.000280515	yes
C16orf80	par72	vir_par72	OK	18.0558	41.897	1.21439	2.32043	1.85012	5e-05	0.000280515	yes
SNRPGP10	par72	vir_par72	OK	35.0871	81.3617	1.21341	2.31885	1.87454	5e-05	0.000280515	yes
KDM3A	par72	vir_par72	OK	14.9504	34.6541	1.21284	2.31793	3.65859	5e-05	0.000280515	yes
RAF1	par72	vir_par72	OK	31.713	73.4668	1.21202	2.31662	2.8712	5e-05	0.000280515	yes
RRAGC	par72	vir_par72	OK	19.6946	45.6026	1.21132	2.31549	3.92606	5e-05	0.000280515	yes
ZNF600	par72	vir_par72	OK	6.51241	15.0709	1.2105	2.31418	1.50522	0.00015	0.000786087	yes
ZNF230	par72	vir_par72	OK	2.95739	6.84373	1.21046	2.31411	1.96643	5e-05	0.000280515	yes
CDR2L	par72	vir_par72	OK	4.47483	10.3524	1.21006	2.31347	3.18635	5e-05	0.000280515	yes
HACL1	par72	vir_par72	OK	21.4381	49.5912	1.20991	2.31323	2.2298	5e-05	0.000280515	yes
PDE12	par72	vir_par72	OK	9.56615	22.1278	1.20985	2.31314	3.64359	5e-05	0.000280515	yes
FKRP	par72	vir_par72	OK	8.3569	19.3285	1.20969	2.31288	0.608354	0.0018	0.00754124	yes
TRIM37	par72	vir_par72	OK	16.7107	38.6048	1.20801	2.31019	2.40768	5e-05	0.000280515	yes
NUP50	par72	vir_par72	OK	38.7501	89.481	1.20738	2.30918	2.60097	5e-05	0.000280515	yes
ZNF598	par72	vir_par72	OK	6.18879	14.2907	1.20735	2.30913	1.86154	5e-05	0.000280515	yes
CHUK	par72	vir_par72	OK	23.8241	54.933	1.20525	2.30577	2.19398	5e-05	0.000280515	yes
TRMT11	par72	vir_par72	OK	29.3406	67.6497	1.20518	2.30566	2.51873	5e-05	0.000280515	yes
BCAR3	par72	vir_par72	OK	3.46328	7.97289	1.20296	2.30212	2.22154	5e-05	0.000280515	yes
FAM43A	par72	vir_par72	OK	3.2111	7.39025	1.20256	2.30148	2.83628	5e-05	0.000280515	yes
CYP2S1	par72	vir_par72	OK	7.90699	18.1845	1.20151	2.2998	2.40991	5e-05	0.000280515	yes
POLR2J4	par72	vir_par72	OK	0.749453	1.72304	1.20104	2.29905	0.977348	0.00585	0.0214125	yes
CBWD1	par72	vir_par72	OK	18.005	41.3895	1.20087	2.29878	3.38905	5e-05	0.000280515	yes
TMEM38B	par72	vir_par72	OK	22.5251	51.7776	1.20079	2.29866	2.90735	5e-05	0.000280515	yes
MON1B	par72	vir_par72	OK	12.5626	28.877	1.20079	2.29866	2.7575	5e-05	0.000280515	yes
BTN2A2	par72	vir_par72	OK	8.85964	20.3589	1.20034	2.29794	1.74396	0.0001	0.000538822	yes
CHD9	par72	vir_par72	OK	9.42031	21.6433	1.20007	2.29751	1.36015	5e-05	0.000280515	yes
ODC1	par72	vir_par72	OK	185.981	427.155	1.1996	2.29676	4.00519	5e-05	0.000280515	yes
ZSCAN25	par72	vir_par72	OK	7.60832	17.4639	1.19873	2.29538	1.54382	5e-05	0.000280515	yes
MSANTD2	par72	vir_par72	OK	3.2944	7.56052	1.19847	2.29496	2.44384	5e-05	0.000280515	yes
RPL32P3	par72	vir_par72	OK	5.758	13.2031	1.19723	2.29299	1.4547	5e-05	0.000280515	yes
CDK12	par72	vir_par72	OK	22.685	52.007	1.19697	2.29258	2.34514	5e-05	0.000280515	yes
TRIM11	par72	vir_par72	OK	7.70095	17.6544	1.19692	2.2925	2.90779	5e-05	0.000280515	yes
ARID2	par72	vir_par72	OK	10.3482	23.7028	1.19568	2.29053	2.77402	5e-05	0.000280515	yes
NIPA2	par72	vir_par72	OK	25.9114	59.2913	1.19423	2.28823	2.35134	5e-05	0.000280515	yes
MARK3	par72	vir_par72	OK	39.1404	89.5421	1.19391	2.28772	3.69268	5e-05	0.000280515	yes
ERCC6-PGBD3	par72	vir_par72	OK	2.65844	6.07984	1.19345	2.28699	1.54374	0.0005	0.00237265	yes
RNFT1	par72	vir_par72	OK	15.7485	36.0146	1.19337	2.28686	1.64103	0.0001	0.000538822	yes
MKNK2	par72	vir_par72	OK	199.711	456.689	1.1933	2.28675	1.8803	5e-05	0.000280515	yes
NSDHL	par72	vir_par72	OK	18.0019	41.1568	1.19298	2.28624	3.44941	5e-05	0.000280515	yes
RAB11FIP5	par72	vir_par72	OK	7.76725	17.7481	1.19219	2.28499	1.93505	5e-05	0.000280515	yes
MMD	par72	vir_par72	OK	9.46579	21.6289	1.19216	2.28495	3.24213	5e-05	0.000280515	yes
DPH3	par72	vir_par72	OK	18.68	42.6624	1.19147	2.28385	3.77509	5e-05	0.000280515	yes
MRRF	par72	vir_par72	OK	24.3277	55.517	1.19033	2.28205	1.81844	5e-05	0.000280515	yes
MGAT2	par72	vir_par72	OK	16.0114	36.5379	1.19029	2.28199	3.75346	5e-05	0.000280515	yes
CCDC86	par72	vir_par72	OK	8.34645	19.0414	1.1899	2.28137	3.17258	5e-05	0.000280515	yes
MAPKAP1	par72	vir_par72	OK	41.2778	94.1453	1.18952	2.28077	3.56466	5e-05	0.000280515	yes
SHOC2	par72	vir_par72	OK	29.7571	67.8563	1.18925	2.28034	3.5687	5e-05	0.000280515	yes
AC020571.3	par72	vir_par72	OK	1.06081	2.41833	1.18885	2.27971	1.39242	0.00095	0.0042445	yes
ABCF2	par72	vir_par72	OK	32.7996	74.7488	1.18837	2.27895	2.98353	5e-05	0.000280515	yes
RPPH1	par72	vir_par72	OK	236.975	539.844	1.18781	2.27807	2.10112	0.00015	0.000786087	yes
QRICH1	par72	vir_par72	OK	25.1195	57.2234	1.1878	2.27805	2.09311	5e-05	0.000280515	yes
AASS	par72	vir_par72	OK	3.85221	8.77369	1.1875	2.27758	2.7052	5e-05	0.000280515	yes
F11R	par72	vir_par72	OK	67.7281	154.193	1.18691	2.27665	2.67738	5e-05	0.000280515	yes
DDX24	par72	vir_par72	OK	70.8781	161.134	1.18485	2.2734	3.89232	5e-05	0.000280515	yes
SLC25A37	par72	vir_par72	OK	50.9313	115.719	1.184	2.27206	3.61067	5e-05	0.000280515	yes
ZCCHC17	par72	vir_par72	OK	26.6457	60.5281	1.1837	2.27159	3.19367	5e-05	0.000280515	yes
GCH1	par72	vir_par72	OK	15.8916	36.0612	1.18218	2.26919	3.65671	5e-05	0.000280515	yes
AGPAT6	par72	vir_par72	OK	41.261	93.5704	1.18127	2.26776	2.13574	5e-05	0.000280515	yes
RAB3IP	par72	vir_par72	OK	20.7643	47.0842	1.18114	2.26756	1.83944	5e-05	0.000280515	yes
RSRC2	par72	vir_par72	OK	44.8106	101.604	1.18105	2.26742	2.90239	5e-05	0.000280515	yes
RNF41	par72	vir_par72	OK	45.5954	103.345	1.18051	2.26657	3.70059	5e-05	0.000280515	yes
FBXO45	par72	vir_par72	OK	12.7481	28.8855	1.18006	2.26586	3.3285	5e-05	0.000280515	yes
ZNF702P	par72	vir_par72	OK	11.1641	25.2839	1.17936	2.26476	1.82227	5e-05	0.000280515	yes
GABPB1	par72	vir_par72	OK	13.084	29.6295	1.17923	2.26456	2.51841	5e-05	0.000280515	yes
ZNF121	par72	vir_par72	OK	57.5608	105.268	1.17837	2.26321	3.93364	5e-05	0.000280515	yes
NFE2L2	par72	vir_par72	OK	66.4255	150.322	1.17825	2.26302	2.77132	5e-05	0.000280515	yes
UNKL	par72	vir_par72	OK	3.56026	8.05643	1.17816	2.26288	1.71156	5e-05	0.000280515	yes
CBLL1	par72	vir_par72	OK	68.4755	154.949	1.17813	2.26283	2.54646	5e-05	0.000280515	yes
GOLGB1	par72	vir_par72	OK	14.9385	33.7898	1.17756	2.26194	1.82197	5e-05	0.000280515	yes
KLHL18	par72	vir_par72	OK	7.58575	17.154	1.17718	2.26134	2.47849	5e-05	0.000280515	yes
EIF2B2	par72	vir_par72	OK	14.1134	31.9131	1.17709	2.2612	3.29282	5e-05	0.000280515	yes
RP11-268J15.5	par72	vir_par72	OK	0.765464	1.73083	1.17706	2.26116	1.2907	0.00265	0.0106403	yes
RTCB	par72	vir_par72	OK	133.537	301.707	1.17591	2.25935	3.35136	5e-05	0.000280515	yes
ZNF563	par72	vir_par72	OK	2.183	4.931	1.17557	2.25882	1.93664	5e-05	0.000280515	yes
POLR3C	par72	vir_par72	OK	12.3701	27.935	1.17521	2.25826	3.3016	5e-05	0.000280515	yes
SAR1B	par72	vir_par72	OK	41.9452	94.7165	1.17511	2.2581	1.78626	5e-05	0.000280515	yes
FAM200A	par72	vir_par72	OK	4.97071	11.2217	1.17477	2.25757	2.0868	5e-05	0.000280515	yes
ATG4AP1	par72	vir_par72	OK	4.11355	9.28553	1.1746	2.2573	1.92195	5e-05	0.000280515	yes
AC005336.4	par72	vir_par72	OK	7.85693	17.7246	1.17371	2.25591	2.81425	5e-05	0.000280515	yes
RP11-1033A18.1	par72	vir_par72	OK	35.1174	79.2123	1.17354	2.25564	3.58789	5e-05	0.000280515	yes
RHOF	par72	vir_par72	OK	22.2721	50.2254	1.17318	2.25508	3.1887	5e-05	0.000280515	yes
CTD-2267D19.6	par72	vir_par72	OK	0.909694	2.051	1.17288	2.25461	1.8016	0.0001	0.000538822	yes
CEBPB	par72	vir_par72	OK	23.7773	53.594	1.17249	2.254	3.62466	5e-05	0.000280515	yes
KANSL2	par72	vir_par72	OK	37.2208	83.8931	1.17244	2.25393	2.67492	5e-05	0.000280515	yes
RP9	par72	vir_par72	OK	2.82471	6.36225	1.17143	2.25235	2.25668	5e-05	0.000280515	yes
TMED5	par72	vir_par72	OK	57.5912	129.589	1.17003	2.25016	2.8276	5e-05	0.000280515	yes
MCFD2	par72	vir_par72	OK	118.268	266.037	1.16957	2.24945	2.3711	5e-05	0.000280515	yes
CSTF1	par72	vir_par72	OK	29.8622	67.1382	1.16881	2.24826	3.11924	5e-05	0.000280515	yes
CCNC	par72	vir_par72	OK	75.5787	169.838	1.1681	2.24716	3.15942	5e-05	0.000280515	yes
TMEM11	par72	vir_par72	OK	13.7248	30.8387	1.16796	2.24694	2.85928	5e-05	0.000280515	yes
GLRX2	par72	vir_par72	OK	6.61193	14.8545	1.16776	2.24663	2.34781	5e-05	0.000280515	yes
UAP1L1	par72	vir_par72	OK	5.627	12.6311	1.16654	2.24473	3.06923	5e-05	0.000280515	yes
AC093838.4	par72	vir_par72	OK	6.11282	13.7212	1.1665	2.24466	2.13248	5e-05	0.000280515	yes
ABCA11P	par72	vir_par72	OK	4.52314	10.1497	1.16604	2.24395	1.11773	0.0076	0.0269067	yes
DGKH	par72	vir_par72	OK	2.33841	5.24357	1.16502	2.24236	2.94866	5e-05	0.000280515	yes
HCCS	par72	vir_par72	OK	19.177	42.9707	1.16397	2.24073	3.38023	5e-05	0.000280515	yes
TRAPPC10	par72	vir_par72	OK	14.752	33.0411	1.16335	2.23977	2.28556	5e-05	0.000280515	yes
PARP6	par72	vir_par72	OK	22.6185	50.6545	1.16319	2.23952	1.95601	5e-05	0.000280515	yes
CTC-444N24.8	par72	vir_par72	OK	2.32084	5.19561	1.16265	2.23868	2.23368	5e-05	0.000280515	yes
RNF7	par72	vir_par72	OK	37.0658	82.886	1.16104	2.23619	2.98121	5e-05	0.000280515	yes
FTH1	par72	vir_par72	OK	845.904	1891.59	1.16103	2.23617	3.19429	5e-05	0.000280515	yes
HAUS6P1	par72	vir_par72	OK	6.24935	13.9706	1.16062	2.23553	2.76156	5e-05	0.000280515	yes
CERS5	par72	vir_par72	OK	20.7203	46.3102	1.16029	2.23502	2.9556	5e-05	0.000280515	yes
PPARG	par72	vir_par72	OK	20.6649	46.1413	1.15887	2.23282	2.49497	5e-05	0.000280515	yes
LPIN1	par72	vir_par72	OK	10.9447	24.4283	1.15832	2.23197	2.30264	5e-05	0.000280515	yes
C16orf87	par72	vir_par72	OK	12.5697	28.0284	1.15694	2.22984	3.15056	5e-05	0.000280515	yes
OTUD3	par72	vir_par72	OK	10.3757	23.1251	1.15626	2.22879	3.30511	5e-05	0.000280515	yes
MORF4L2	par72	vir_par72	OK	489.249	1090.32	1.15611	2.22856	2.45584	5e-05	0.000280515	yes
NUAK2	par72	vir_par72	OK	8.11277	18.0761	1.15582	2.22811	3.36466	5e-05	0.000280515	yes
RHOQP2	par72	vir_par72	OK	6.71888	14.9682	1.1556	2.22777	2.2211	5e-05	0.000280515	yes
BAG1	par72	vir_par72	OK	20.9943	46.7647	1.15542	2.22749	3.37638	5e-05	0.000280515	yes
RP11-295G20.2	par72	vir_par72	OK	17.613	39.1926	1.15394	2.22521	2.51357	5e-05	0.000280515	yes
GPATCH2L	par72	vir_par72	OK	14.5781	32.4227	1.1532	2.22407	1.46007	0.00025	0.00125904	yes
NUP153	par72	vir_par72	OK	22.5384	50.1199	1.153	2.22376	4.01039	5e-05	0.000280515	yes
PPP2CA	par72	vir_par72	OK	43.9068	97.627	1.15284	2.22351	1.88691	5e-05	0.000280515	yes
DUSP14	par72	vir_par72	OK	22.8158	50.72	1.15252	2.22302	3.42603	5e-05	0.000280515	yes
PPTC7	par72	vir_par72	OK	20.2753	45.0619	1.15218	2.22249	3.25806	5e-05	0.000280515	yes
RP11-815I9.4	par72	vir_par72	OK	3.14395	6.98698	1.15209	2.22236	1.18904	0.00705	0.0252011	yes
ZNF227	par72	vir_par72	OK	23.8482	52.9926	1.15191	2.22208	2.06282	5e-05	0.000280515	yes
BLCAP	par72	vir_par72	OK	35.9872	79.944	1.15151	2.22146	3.68674	5e-05	0.000280515	yes
NETO2	par72	vir_par72	OK	2.55369	5.66251	1.14886	2.21739	2.06027	5e-05	0.000280515	yes
ZNF674	par72	vir_par72	OK	5.26442	11.6652	1.14786	2.21585	1.36289	0.0024	0.00974437	yes
RHEBL1	par72	vir_par72	OK	1.93804	4.28817	1.14576	2.21263	1.76106	5e-05	0.000280515	yes
ABCF2P1	par72	vir_par72	OK	1.28886	2.85087	1.1453	2.21192	2.13119	5e-05	0.000280515	yes
RNF7P1	par72	vir_par72	OK	24.8996	55.0641	1.14499	2.21145	2.07538	5e-05	0.000280515	yes
ARCN1	par72	vir_par72	OK	130.987	289.502	1.14416	2.21017	2.647	5e-05	0.000280515	yes
STX16	par72	vir_par72	OK	28.0463	61.9532	1.14337	2.20896	3.08052	5e-05	0.000280515	yes
STARD5	par72	vir_par72	OK	3.66736	8.10027	1.14323	2.20875	1.83033	5e-05	0.000280515	yes
DDX31	par72	vir_par72	OK	8.71907	19.2578	1.1432	2.2087	1.69278	5e-05	0.000280515	yes
SAR1A	par72	vir_par72	OK	88.9634	196.478	1.14309	2.20854	3.77988	5e-05	0.000280515	yes
NT5DC3	par72	vir_par72	OK	7.69616	16.9927	1.14271	2.20795	2.2149	5e-05	0.000280515	yes
GIGYF2	par72	vir_par72	OK	102.183	225.608	1.14267	2.20789	1.65318	0.00015	0.000786087	yes
DHX29	par72	vir_par72	OK	7.12188	15.7211	1.14237	2.20743	2.71576	5e-05	0.000280515	yes
SF3B3	par72	vir_par72	OK	63.1769	139.399	1.14176	2.2065	1.76184	5e-05	0.000280515	yes
RP11-144L1.8	par72	vir_par72	OK	3.97704	8.77443	1.14161	2.20627	2.89418	5e-05	0.000280515	yes
NMD3P1	par72	vir_par72	OK	2.71296	5.98365	1.14116	2.20558	2.28516	5e-05	0.000280515	yes
WDR55	par72	vir_par72	OK	7.19026	15.857	1.141	2.20534	1.49893	0.00055	0.00258647	yes
SESN2	par72	vir_par72	OK	19.9978	44.072	1.14002	2.20384	3.73634	5e-05	0.000280515	yes
SLC25A44	par72	vir_par72	OK	15.2804	33.6669	1.13965	2.20328	2.39168	5e-05	0.000280515	yes
RINT1	par72	vir_par72	OK	12.1072	26.6745	1.1396	2.2032	2.58164	5e-05	0.000280515	yes
FTH1P5	par72	vir_par72	OK	38.6237	85.0634	1.13905	2.20236	2.9999	5e-05	0.000280515	yes
PCGF1	par72	vir_par72	OK	23.4555	51.6571	1.13904	2.20234	2.73585	5e-05	0.000280515	yes
TOE1	par72	vir_par72	OK	10.5382	23.2067	1.13891	2.20215	2.16752	5e-05	0.000280515	yes
VAMP7	par72	vir_par72	OK	35.2847	77.6927	1.13874	2.20189	3.61969	5e-05	0.000280515	yes
RP11-119F19.2	par72	vir_par72	OK	6.2023	13.6564	1.13871	2.20184	1.90678	5e-05	0.000280515	yes
CIRH1A	par72	vir_par72	OK	61.4445	135.288	1.13868	2.20179	1.35153	0.00025	0.00125904	yes
KLHL11	par72	vir_par72	OK	5.96207	13.1181	1.13768	2.20027	3.03587	5e-05	0.000280515	yes
RUSC2	par72	vir_par72	OK	2.35584	5.17928	1.13651	2.19849	1.7955	5e-05	0.000280515	yes
B4GALT4	par72	vir_par72	OK	28.3839	62.3094	1.13438	2.19524	3.00392	5e-05	0.000280515	yes
REXO1	par72	vir_par72	OK	2.75304	6.04318	1.13428	2.19509	1.31045	0.00015	0.000786087	yes
JDP2	par72	vir_par72	OK	23.741	52.1109	1.1342	2.19497	2.94944	5e-05	0.000280515	yes
PRSS23	par72	vir_par72	OK	63.5048	139.388	1.13417	2.19492	2.45841	5e-05	0.000280515	yes
TOB1	par72	vir_par72	OK	39.3664	86.398	1.13403	2.19471	3.76834	5e-05	0.000280515	yes
TVP23B	par72	vir_par72	OK	14.686	32.2267	1.13381	2.19437	2.98683	5e-05	0.000280515	yes
DYNC1LI1	par72	vir_par72	OK	13.986	30.6795	1.13329	2.19358	3.46651	5e-05	0.000280515	yes
EIF5A2	par72	vir_par72	OK	14.9386	32.7435	1.13217	2.19188	1.67011	5e-05	0.000280515	yes
GOLPH3	par72	vir_par72	OK	49.6582	108.793	1.13149	2.19085	3.95821	5e-05	0.000280515	yes
SEC16A	par72	vir_par72	OK	22.2962	48.8411	1.1313	2.19056	2.60252	5e-05	0.000280515	yes
ELF1	par72	vir_par72	OK	62.372	136.595	1.13094	2.19001	3.17355	5e-05	0.000280515	yes
AGPAT4	par72	vir_par72	OK	8.48171	18.5478	1.12882	2.1868	1.84417	5e-05	0.000280515	yes
PIGG	par72	vir_par72	OK	17.4779	38.2145	1.12859	2.18645	2.67945	5e-05	0.000280515	yes
HABP4	par72	vir_par72	OK	9.21377	20.145	1.12856	2.1864	2.5307	5e-05	0.000280515	yes
PRMT10	par72	vir_par72	OK	6.89985	15.083	1.12828	2.18598	1.98837	5e-05	0.000280515	yes
UTY	par72	vir_par72	OK	0.494459	1.08036	1.12759	2.18493	0.773108	0.00635	0.0230026	yes
POLR3G	par72	vir_par72	OK	4.27466	9.3374	1.12721	2.18436	1.626	5e-05	0.000280515	yes
UBA6-AS1	par72	vir_par72	OK	12.5145	27.3341	1.1271	2.18419	2.80281	5e-05	0.000280515	yes
AP1G1	par72	vir_par72	OK	51.192	111.735	1.12609	2.18266	2.15939	5e-05	0.000280515	yes
CCDC130	par72	vir_par72	OK	9.29409	20.2833	1.12591	2.18239	2.31394	5e-05	0.000280515	yes
AIFM2	par72	vir_par72	OK	8.10047	17.677	1.12579	2.18221	2.68313	5e-05	0.000280515	yes
TOP3B	par72	vir_par72	OK	6.48164	14.139	1.12525	2.18139	1.70572	5e-05	0.000280515	yes
USP8	par72	vir_par72	OK	46.3336	101.061	1.12509	2.18115	1.87551	5e-05	0.000280515	yes
ARIH2P1	par72	vir_par72	OK	0.903682	1.97076	1.12487	2.18082	1.82657	5e-05	0.000280515	yes
LRRC42	par72	vir_par72	OK	36.6306	79.8624	1.12447	2.18021	3.28867	5e-05	0.000280515	yes
TRMT44	par72	vir_par72	OK	5.37264	11.7086	1.12387	2.17931	1.88295	5e-05	0.000280515	yes
SLC10A7	par72	vir_par72	OK	14.1081	30.7425	1.12371	2.17907	2.70875	5e-05	0.000280515	yes
CHMP4B	par72	vir_par72	OK	41.8914	91.2711	1.1235	2.17875	3.87171	5e-05	0.000280515	yes
CHPF2	par72	vir_par72	OK	5.41388	11.7903	1.12287	2.1778	2.35564	5e-05	0.000280515	yes
COPS3	par72	vir_par72	OK	91.2456	198.656	1.12244	2.17715	3.13548	5e-05	0.000280515	yes
ELP3	par72	vir_par72	OK	61.2371	133.319	1.1224	2.17709	3.05696	5e-05	0.000280515	yes
SERPINB9	par72	vir_par72	OK	16.7231	36.3958	1.12193	2.17638	3.68708	5e-05	0.000280515	yes
CCDC174	par72	vir_par72	OK	15.1349	32.9295	1.1215	2.17573	2.53993	5e-05	0.000280515	yes
FABP3	par72	vir_par72	OK	30.2403	65.7936	1.12147	2.17569	3.1502	5e-05	0.000280515	yes
GALK2	par72	vir_par72	OK	36.6213	79.6465	1.12093	2.17487	1.48999	5e-05	0.000280515	yes
GPBP1	par72	vir_par72	OK	50.2539	109.292	1.12088	2.1748	3.2974	5e-05	0.000280515	yes
GON4L	par72	vir_par72	OK	7.47084	16.2461	1.12076	2.17461	1.07558	5e-05	0.000280515	yes
USP15	par72	vir_par72	OK	22.757	49.4607	1.11997	2.17342	2.17264	5e-05	0.000280515	yes
NOL8	par72	vir_par72	OK	29.3958	63.88	1.11975	2.17309	1.96025	5e-05	0.000280515	yes
PGBD1	par72	vir_par72	OK	1.57648	3.42307	1.11859	2.17135	2.43996	5e-05	0.000280515	yes
SKIL	par72	vir_par72	OK	13.3378	28.9515	1.11811	2.17062	1.82108	5e-05	0.000280515	yes
ZNF567	par72	vir_par72	OK	20.7124	44.9586	1.1181	2.17061	1.24431	0.0015	0.00640294	yes
ERF	par72	vir_par72	OK	19.6046	42.5402	1.11764	2.16992	2.33097	5e-05	0.000280515	yes
POLR1C	par72	vir_par72	OK	69.8205	151.487	1.11747	2.16966	1.78005	0.0001	0.000538822	yes
RSBN1L-AS1	par72	vir_par72	OK	13.2033	28.6335	1.11681	2.16867	2.19809	5e-05	0.000280515	yes
ST6GALNAC6	par72	vir_par72	OK	10.8382	23.4879	1.11579	2.16714	2.28505	5e-05	0.000280515	yes
EIF2B4	par72	vir_par72	OK	17.7169	38.3742	1.11501	2.16597	1.8067	5e-05	0.000280515	yes
HSPA13	par72	vir_par72	OK	106.08	229.731	1.1148	2.16565	3.49415	5e-05	0.000280515	yes
PTPN1	par72	vir_par72	OK	17.9298	38.825	1.11462	2.16538	3.71936	5e-05	0.000280515	yes
SRSF8	par72	vir_par72	OK	13.7397	29.7488	1.11448	2.16517	2.15079	5e-05	0.000280515	yes
ARL14EP	par72	vir_par72	OK	34.5677	74.8427	1.11444	2.16511	2.25649	5e-05	0.000280515	yes
FTH1P8	par72	vir_par72	OK	64.9231	140.546	1.11424	2.16481	3.19672	5e-05	0.000280515	yes
RP11-640M9.2	par72	vir_par72	OK	1.36579	2.95487	1.11335	2.16347	1.49376	5e-05	0.000280515	yes
SH3RF2	par72	vir_par72	OK	5.73878	12.3973	1.11121	2.16027	2.49904	5e-05	0.000280515	yes
TTC27	par72	vir_par72	OK	18.1253	39.1534	1.11114	2.16016	2.4585	5e-05	0.000280515	yes
BTBD19	par72	vir_par72	OK	2.75263	5.94376	1.11056	2.15929	2.00334	5e-05	0.000280515	yes
ZNF490	par72	vir_par72	OK	4.90744	10.5947	1.1103	2.15891	1.19076	0.004	0.0153225	yes
BRAP	par72	vir_par72	OK	8.24818	17.8052	1.11015	2.15868	3.34779	5e-05	0.000280515	yes
B4GALT2	par72	vir_par72	OK	11.4165	24.6385	1.1098	2.15816	2.70843	5e-05	0.000280515	yes
RNGTT	par72	vir_par72	OK	15.0816	32.5455	1.10967	2.15796	3.67231	5e-05	0.000280515	yes
DHDDS	par72	vir_par72	OK	43.4362	93.7123	1.10934	2.15747	2.59996	5e-05	0.000280515	yes
RPP25L	par72	vir_par72	OK	25.7198	55.4793	1.10907	2.15707	2.87832	5e-05	0.000280515	yes
ACIN1	par72	vir_par72	OK	99.4293	214.371	1.10837	2.15602	1.7618	5e-05	0.000280515	yes
RPUSD2	par72	vir_par72	OK	5.04211	10.8701	1.10826	2.15585	2.63249	5e-05	0.000280515	yes
SMNDC1	par72	vir_par72	OK	15.6643	33.7644	1.10802	2.1555	2.63729	5e-05	0.000280515	yes
ZNF354A	par72	vir_par72	OK	6.69066	14.4192	1.10777	2.15512	2.98973	5e-05	0.000280515	yes
HIVEP1	par72	vir_par72	OK	10.9731	23.6479	1.10774	2.15508	1.30052	0.00225	0.00920323	yes
MDFI	par72	vir_par72	OK	3.03641	6.54366	1.10773	2.15506	2.04498	5e-05	0.000280515	yes
ISCA1P1	par72	vir_par72	OK	18.5221	39.9089	1.10746	2.15466	2.12601	5e-05	0.000280515	yes
PDXP	par72	vir_par72	OK	5.68888	12.2543	1.10707	2.15408	1.62857	0.0003	0.00148912	yes
STT3A	par72	vir_par72	OK	389.013	837.826	1.10683	2.15372	2.7057	5e-05	0.000280515	yes
KCTD7,RABGEF1	par72	vir_par72	OK	12.3482	26.5855	1.10634	2.15299	2.25627	5e-05	0.000280515	yes
USP8P1	par72	vir_par72	OK	0.630605	1.35767	1.10633	2.15297	2.04495	5e-05	0.000280515	yes
ANKRD29	par72	vir_par72	OK	0.504871	1.08643	1.10561	2.1519	1.05984	0.0007	0.00321832	yes
SLC5A1	par72	vir_par72	OK	2.17553	4.68063	1.10534	2.1515	1.89181	5e-05	0.000280515	yes
USP25	par72	vir_par72	OK	40.8203	87.8157	1.10519	2.15127	3.77689	5e-05	0.000280515	yes
CDADC1	par72	vir_par72	OK	11.186	24.0509	1.1044	2.15009	1.91532	5e-05	0.000280515	yes
CRLS1	par72	vir_par72	OK	33.0668	71.0851	1.10417	2.14975	2.8362	5e-05	0.000280515	yes
EPB41L4A-AS1	par72	vir_par72	OK	33.0261	70.9852	1.10391	2.14936	1.64102	0.0005	0.00237265	yes
BLOC1S2	par72	vir_par72	OK	48.4078	103.957	1.10268	2.14753	3.03691	5e-05	0.000280515	yes
BRPF3	par72	vir_par72	OK	17.7058	37.9866	1.10127	2.14543	2.67899	5e-05	0.000280515	yes
JADE3	par72	vir_par72	OK	13.2808	28.4893	1.10108	2.14515	3.11852	5e-05	0.000280515	yes
HARS2	par72	vir_par72	OK	9.7534	20.9179	1.10076	2.14468	1.00091	0.0007	0.00321832	yes
TTC38	par72	vir_par72	OK	10.8177	23.1851	1.0998	2.14325	2.107	5e-05	0.000280515	yes
GRHL1	par72	vir_par72	OK	1.98225	4.24705	1.09932	2.14254	2.26947	5e-05	0.000280515	yes
TRAF3	par72	vir_par72	OK	5.31089	11.3785	1.09929	2.14249	2.57748	5e-05	0.000280515	yes
TBC1D25	par72	vir_par72	OK	5.60362	12.0014	1.09877	2.14172	1.76481	5e-05	0.000280515	yes
RP11-849F2.8	par72	vir_par72	OK	0.699605	1.49831	1.09872	2.14165	1.234	0.0036	0.0139619	yes
ENTPD4	par72	vir_par72	OK	23.8563	51.0726	1.09818	2.14084	2.42053	5e-05	0.000280515	yes
GPS2	par72	vir_par72	OK	16.9361	36.2535	1.09802	2.14061	0.952882	0.0048	0.0179945	yes
TBC1D8B	par72	vir_par72	OK	3.50531	7.50323	1.09797	2.14053	0.972432	0.01195	0.0397968	yes
AKR7L	par72	vir_par72	OK	0.59597	1.27534	1.09758	2.13995	1.30922	0.0013	0.00562895	yes
FARSA	par72	vir_par72	OK	13.1399	28.1097	1.09711	2.13926	2.6094	5e-05	0.000280515	yes
ZHX2	par72	vir_par72	OK	7.41609	15.8632	1.09695	2.13902	1.98511	5e-05	0.000280515	yes
ZNF502	par72	vir_par72	OK	12.2914	26.2892	1.09682	2.13883	3.35424	5e-05	0.000280515	yes
KRT10	par72	vir_par72	OK	4.09432	8.75464	1.09642	2.13823	1.93979	0.0001	0.000538822	yes
C14orf119	par72	vir_par72	OK	118.507	253.381	1.09634	2.13812	1.65002	5e-05	0.000280515	yes
WDR61	par72	vir_par72	OK	57.2186	122.318	1.09608	2.13773	2.47956	5e-05	0.000280515	yes
ISY1	par72	vir_par72	OK	17.4513	37.3008	1.09587	2.13742	2.67967	5e-05	0.000280515	yes
FAM133DP	par72	vir_par72	OK	2.85504	6.09797	1.09482	2.13586	1.95806	5e-05	0.000280515	yes
ANKAR	par72	vir_par72	OK	0.731016	1.56082	1.09433	2.13514	0.661264	0.00885	0.0306957	yes
FTH1P20	par72	vir_par72	OK	246.52	526.352	1.09433	2.13514	3.76593	5e-05	0.000280515	yes
RP11-198M15.1	par72	vir_par72	OK	7.80298	16.6593	1.09423	2.13499	1.35564	0.0019	0.00791327	yes
RNF4	par72	vir_par72	OK	67.7528	144.554	1.09326	2.13356	2.06843	5e-05	0.000280515	yes
CMC2	par72	vir_par72	OK	18.266	38.9651	1.09302	2.1332	1.63159	0.0001	0.000538822	yes
PROSER2	par72	vir_par72	OK	14.9464	31.8815	1.09292	2.13305	3.05181	5e-05	0.000280515	yes
UBE2F	par72	vir_par72	OK	14.64	31.2245	1.09276	2.13282	2.36226	5e-05	0.000280515	yes
FTH1P7	par72	vir_par72	OK	114.982	245.205	1.09258	2.13255	3.46084	5e-05	0.000280515	yes
FBXL18	par72	vir_par72	OK	1.3185	2.81053	1.09195	2.13162	2.07311	5e-05	0.000280515	yes
VPS37C	par72	vir_par72	OK	9.11438	19.4228	1.09154	2.13101	1.73591	0.0001	0.000538822	yes
WSB2	par72	vir_par72	OK	70.2348	149.672	1.09154	2.13101	3.52488	5e-05	0.000280515	yes
RPS6KA1	par72	vir_par72	OK	24.2146	51.5976	1.09142	2.13084	2.461	5e-05	0.000280515	yes
C17orf59	par72	vir_par72	OK	0.990595	2.10971	1.09068	2.12974	1.84312	5e-05	0.000280515	yes
DHX57	par72	vir_par72	OK	13.4799	28.708	1.09064	2.12968	3.34459	5e-05	0.000280515	yes
ZNF354B	par72	vir_par72	OK	3.16585	6.74064	1.09029	2.12917	2.27445	5e-05	0.000280515	yes
LYPD3	par72	vir_par72	OK	2.04035	4.34366	1.09009	2.12887	1.94157	5e-05	0.000280515	yes
TSPAN5	par72	vir_par72	OK	18.6917	39.777	1.08953	2.12805	2.61581	5e-05	0.000280515	yes
CHMP5	par72	vir_par72	OK	75.2898	160.196	1.08931	2.12772	3.74179	5e-05	0.000280515	yes
KCTD2	par72	vir_par72	OK	13.0743	27.7992	1.08831	2.12625	2.46444	5e-05	0.000280515	yes
TOMM34	par72	vir_par72	OK	28.5432	60.6599	1.0876	2.1252	3.05529	5e-05	0.000280515	yes
RUNX1	par72	vir_par72	OK	12.2659	26.067	1.08757	2.12516	3.1615	5e-05	0.000280515	yes
RANBP20P	par72	vir_par72	OK	1.22544	2.6035	1.08715	2.12454	1.99691	5e-05	0.000280515	yes
IFNGR2	par72	vir_par72	OK	53.5898	113.821	1.08674	2.12394	2.93237	5e-05	0.000280515	yes
SDHAF1	par72	vir_par72	OK	3.54664	7.52875	1.08596	2.12279	2.21439	5e-05	0.000280515	yes
RP11-156E6.1	par72	vir_par72	OK	13.509	28.6678	1.08551	2.12213	3.16693	5e-05	0.000280515	yes
CHORDC1	par72	vir_par72	OK	14.8921	31.5999	1.08538	2.12193	1.87413	5e-05	0.000280515	yes
SUPT20H	par72	vir_par72	OK	30.5533	64.8122	1.08493	2.12127	1.76273	5e-05	0.000280515	yes
CDKN1A	par72	vir_par72	OK	83.6158	177.3	1.08435	2.12042	3.7965	5e-05	0.000280515	yes
RPP14	par72	vir_par72	OK	26.8847	56.9972	1.08411	2.12007	2.32585	5e-05	0.000280515	yes
MECR	par72	vir_par72	OK	9.53107	20.2015	1.08376	2.11955	2.25965	5e-05	0.000280515	yes
SLMAP	par72	vir_par72	OK	22.5672	47.8194	1.08337	2.11898	2.45785	5e-05	0.000280515	yes
ZNF609	par72	vir_par72	OK	23.2926	49.3218	1.08236	2.1175	1.57241	5e-05	0.000280515	yes
KIAA1429	par72	vir_par72	OK	18.6765	39.5334	1.08184	2.11673	2.64661	5e-05	0.000280515	yes
RPL22L1	par72	vir_par72	OK	671.838	1421.52	1.08125	2.11587	3.18303	5e-05	0.000280515	yes
YWHAG	par72	vir_par72	OK	203.855	431.07	1.08038	2.11459	3.50988	5e-05	0.000280515	yes
AC069287.1	par72	vir_par72	OK	14.6566	30.948	1.0783	2.11155	1.16929	0.00675	0.0242646	yes
TUBA4A	par72	vir_par72	OK	14.5122	30.632	1.07777	2.11077	1.17167	0.01025	0.0348477	yes
HAUS6	par72	vir_par72	OK	5.31917	11.2241	1.07732	2.11011	3.15845	5e-05	0.000280515	yes
C19orf10	par72	vir_par72	OK	48.1786	101.656	1.07722	2.10997	3.05824	5e-05	0.000280515	yes
LRRC8A	par72	vir_par72	OK	6.59947	13.9242	1.07717	2.10989	2.64176	5e-05	0.000280515	yes
MON2	par72	vir_par72	OK	13.7538	29.0012	1.07628	2.10859	2.10698	5e-05	0.000280515	yes
ZNF83	par72	vir_par72	OK	32.6251	68.783	1.07607	2.10829	2.08226	5e-05	0.000280515	yes
HOMER1	par72	vir_par72	OK	10.7694	22.7044	1.07603	2.10823	2.26644	5e-05	0.000280515	yes
SMEK1	par72	vir_par72	OK	32.858	69.2655	1.07589	2.10802	3.20015	5e-05	0.000280515	yes
KDM5A	par72	vir_par72	OK	12.1706	25.6426	1.07514	2.10693	1.18363	5e-05	0.000280515	yes
DENND2C	par72	vir_par72	OK	2.15361	4.537	1.07498	2.10669	2.11095	5e-05	0.000280515	yes
YTHDF3	par72	vir_par72	OK	36.4091	76.6907	1.07475	2.10636	3.59769	5e-05	0.000280515	yes
TULP3	par72	vir_par72	OK	21.1949	44.6334	1.07441	2.10586	1.64452	0.0002	0.00102556	yes
RBM12	par72	vir_par72	OK	83.0327	174.846	1.07433	2.10574	2.23246	5e-05	0.000280515	yes
FOXJ3	par72	vir_par72	OK	29.1644	61.3677	1.07327	2.1042	3.54848	5e-05	0.000280515	yes
AL645728.2	par72	vir_par72	OK	4.82166	10.1457	1.07326	2.10418	1.17644	0.00505	0.0188233	yes
IFNGR1	par72	vir_par72	OK	42.3912	89.1551	1.07255	2.10315	3.40115	5e-05	0.000280515	yes
SMG1	par72	vir_par72	OK	15.3878	32.3604	1.07245	2.103	2.42083	5e-05	0.000280515	yes
SDCBPP2	par72	vir_par72	OK	11.4775	24.1293	1.07198	2.10232	2.54527	5e-05	0.000280515	yes
ATAD3B	par72	vir_par72	OK	1.81893	3.82383	1.07193	2.10224	2.12536	5e-05	0.000280515	yes
TSC1	par72	vir_par72	OK	10.1152	21.2627	1.0718	2.10205	2.2583	5e-05	0.000280515	yes
ATP2B1	par72	vir_par72	OK	45.1159	94.8349	1.07178	2.10203	2.08907	5e-05	0.000280515	yes
SLC41A2	par72	vir_par72	OK	19.6391	41.2811	1.07175	2.10198	2.19084	5e-05	0.000280515	yes
GPRC5A	par72	vir_par72	OK	96.1135	201.974	1.07136	2.10141	2.15206	5e-05	0.000280515	yes
ZNF460	par72	vir_par72	OK	3.53793	7.43192	1.07083	2.10064	2.5237	5e-05	0.000280515	yes
TPD52L2	par72	vir_par72	OK	58.776	123.463	1.07078	2.10057	3.74947	5e-05	0.000280515	yes
LINC00960	par72	vir_par72	OK	4.32067	9.07441	1.07055	2.10023	2.3078	5e-05	0.000280515	yes
BRAF	par72	vir_par72	OK	13.4207	28.1865	1.07054	2.10022	2.6458	5e-05	0.000280515	yes
KIN	par72	vir_par72	OK	8.36488	17.5647	1.07026	2.09981	2.12715	5e-05	0.000280515	yes
SNX16	par72	vir_par72	OK	9.52241	19.9912	1.06997	2.09939	2.13065	5e-05	0.000280515	yes
PTRF	par72	vir_par72	OK	11.5147	24.163	1.06932	2.09844	3.40855	5e-05	0.000280515	yes
PRDM2	par72	vir_par72	OK	12.1853	25.5525	1.06833	2.097	2.37098	5e-05	0.000280515	yes
ZNF608	par72	vir_par72	OK	4.93055	10.3381	1.06815	2.09674	2.32471	5e-05	0.000280515	yes
SLC25A4	par72	vir_par72	OK	7.79626	16.3378	1.06736	2.0956	2.55667	5e-05	0.000280515	yes
XPO6	par72	vir_par72	OK	38.7786	81.2483	1.06708	2.09519	1.66626	5e-05	0.000280515	yes
ATXN2L	par72	vir_par72	OK	61.3328	128.443	1.0664	2.0942	2.1192	5e-05	0.000280515	yes
MYSM1	par72	vir_par72	OK	18.7101	39.1757	1.06614	2.09382	1.80546	5e-05	0.000280515	yes
NOC3L	par72	vir_par72	OK	51.6584	108.15	1.06595	2.09355	1.99183	5e-05	0.000280515	yes
ISG20L2	par72	vir_par72	OK	36.6089	76.624	1.0656	2.09304	1.74003	0.0003	0.00148912	yes
CLCN4	par72	vir_par72	OK	3.58688	7.50587	1.06529	2.09259	3.01237	5e-05	0.000280515	yes
TRIM16L	par72	vir_par72	OK	20.259	42.3928	1.06525	2.09253	2.40329	5e-05	0.000280515	yes
SMG8	par72	vir_par72	OK	9.311	19.4696	1.06421	2.09102	2.033	5e-05	0.000280515	yes
UBE2J1	par72	vir_par72	OK	39.161	81.8356	1.06331	2.08972	3.73478	5e-05	0.000280515	yes
MTCH1	par72	vir_par72	OK	66.4669	138.893	1.06326	2.08965	3.54547	5e-05	0.000280515	yes
HSPA5	par72	vir_par72	OK	354.233	740.152	1.06312	2.08945	3.15016	5e-05	0.000280515	yes
UBE2E2	par72	vir_par72	OK	39.0048	81.4586	1.06242	2.08843	3.35317	5e-05	0.000280515	yes
ASCC3	par72	vir_par72	OK	13.5754	28.3506	1.06238	2.08837	3.31789	5e-05	0.000280515	yes
FAM24B	par72	vir_par72	OK	9.30645	19.4352	1.06237	2.08836	2.10214	5e-05	0.000280515	yes
RP11-7K24.3	par72	vir_par72	OK	4.34727	9.07402	1.06163	2.08729	2.54929	5e-05	0.000280515	yes
MDN1	par72	vir_par72	OK	7.44461	15.537	1.06144	2.08701	1.84997	5e-05	0.000280515	yes
NAA25	par72	vir_par72	OK	21.9412	45.7648	1.06059	2.08578	2.60628	5e-05	0.000280515	yes
CREB1	par72	vir_par72	OK	17.3619	36.2005	1.06008	2.08505	1.75492	5e-05	0.000280515	yes
SNAPC4	par72	vir_par72	OK	1.29184	2.69343	1.06002	2.08496	2.40984	5e-05	0.000280515	yes
ISCA1	par72	vir_par72	OK	19.2654	40.1608	1.05978	2.08461	3.19361	5e-05	0.000280515	yes
UBE2B	par72	vir_par72	OK	96.3974	200.928	1.05961	2.08437	2.43562	5e-05	0.000280515	yes
NIPBL	par72	vir_par72	OK	16.5547	34.5031	1.05948	2.08418	2.04122	5e-05	0.000280515	yes
CRLF3	par72	vir_par72	OK	7.47027	15.5658	1.05915	2.0837	2.61534	5e-05	0.000280515	yes
THUMPD3	par72	vir_par72	OK	19.6117	40.8251	1.05774	2.08167	1.12633	0.00025	0.00125904	yes
NOP16	par72	vir_par72	OK	12.419	25.8514	1.05769	2.0816	1.5719	0.0004	0.00193713	yes
DPP9	par72	vir_par72	OK	8.33251	17.3374	1.05707	2.0807	2.12053	5e-05	0.000280515	yes
SQLE	par72	vir_par72	OK	48.3424	100.586	1.05706	2.08069	3.41858	5e-05	0.000280515	yes
ZNF91	par72	vir_par72	OK	23.2903	48.4581	1.05701	2.08061	1.93611	5e-05	0.000280515	yes
MRPS23	par72	vir_par72	OK	46.6319	96.9572	1.05603	2.0792	3.34173	5e-05	0.000280515	yes
CCDC11	par72	vir_par72	OK	0.779464	1.62065	1.05602	2.07919	1.92891	5e-05	0.000280515	yes
RNF111	par72	vir_par72	OK	17.8614	37.1202	1.05536	2.07824	1.23914	0.0005	0.00237265	yes
SLC39A7	par72	vir_par72	OK	72.5792	150.827	1.05527	2.07811	3.24302	5e-05	0.000280515	yes
NFYA	par72	vir_par72	OK	19.946	41.4345	1.05473	2.07733	2.78077	5e-05	0.000280515	yes
ABT1	par72	vir_par72	OK	7.14518	14.8419	1.05464	2.0772	2.74438	5e-05	0.000280515	yes
JAGN1	par72	vir_par72	OK	19.5919	40.6897	1.0544	2.07685	3.08292	5e-05	0.000280515	yes
CDKAL1	par72	vir_par72	OK	12.2868	25.508	1.05385	2.07606	3.22024	5e-05	0.000280515	yes
TNPO2	par72	vir_par72	OK	29.2555	60.7331	1.05377	2.07595	1.79795	5e-05	0.000280515	yes
CRY1	par72	vir_par72	OK	20.1713	41.8409	1.05261	2.07428	3.16241	5e-05	0.000280515	yes
NCR3LG1	par72	vir_par72	OK	5.28526	10.963	1.05259	2.07425	3.23389	5e-05	0.000280515	yes
CCNE1	par72	vir_par72	OK	3.2509	6.74205	1.05235	2.07391	2.08799	5e-05	0.000280515	yes
MED18	par72	vir_par72	OK	29.1082	60.3659	1.05231	2.07385	2.62929	5e-05	0.000280515	yes
NBPF10	par72	vir_par72	OK	2.98691	6.18841	1.05091	2.07184	2.13638	5e-05	0.000280515	yes
CELSR3	par72	vir_par72	OK	4.63748	9.60312	1.05016	2.07076	2.42751	5e-05	0.000280515	yes
MYNN	par72	vir_par72	OK	17.1783	35.5563	1.04952	2.06984	3.17294	5e-05	0.000280515	yes
PHLPP2	par72	vir_par72	OK	4.76999	9.86937	1.04897	2.06905	2.76062	5e-05	0.000280515	yes
HMGCL	par72	vir_par72	OK	53.3529	110.35	1.04845	2.06831	3.5561	5e-05	0.000280515	yes
LGALSL	par72	vir_par72	OK	25.9234	53.615	1.04838	2.06821	3.25152	5e-05	0.000280515	yes
SENP5	par72	vir_par72	OK	11.7905	24.3745	1.04775	2.0673	1.77196	5e-05	0.000280515	yes
FTH1P23	par72	vir_par72	OK	43.1425	89.1559	1.04722	2.06654	1.11724	0.0069	0.0247297	yes
SRF	par72	vir_par72	OK	14.8465	30.676	1.04699	2.06621	3.44378	5e-05	0.000280515	yes
TCEAL3	par72	vir_par72	OK	8.90239	18.3767	1.04561	2.06424	2.33435	5e-05	0.000280515	yes
SLAIN2	par72	vir_par72	OK	40.6861	83.8867	1.04391	2.06181	1.27581	0.0012	0.00523774	yes
FADD	par72	vir_par72	OK	13.4667	27.7608	1.04366	2.06145	3.04771	5e-05	0.000280515	yes
SLC19A3	par72	vir_par72	OK	0.489181	1.0084	1.04363	2.06141	0.791978	0.00455	0.0171695	yes
RPF2P1	par72	vir_par72	OK	6.65434	13.7153	1.04342	2.06111	2.15431	5e-05	0.000280515	yes
CIAPIN1P	par72	vir_par72	OK	6.61432	13.628	1.04291	2.06038	1.36515	0.00205	0.00846745	yes
CTD-2012J19.1	par72	vir_par72	OK	1.498	3.08432	1.04191	2.05895	1.13831	0.00925	0.0318869	yes
HNRNPLL	par72	vir_par72	OK	26.842	55.2632	1.04183	2.05884	3.23888	5e-05	0.000280515	yes
FAM109B	par72	vir_par72	OK	11.0057	22.657	1.04171	2.05867	2.99443	5e-05	0.000280515	yes
PSMD13	par72	vir_par72	OK	74.2706	152.783	1.04062	2.05711	2.40754	5e-05	0.000280515	yes
PSMG3	par72	vir_par72	OK	18.2077	37.446	1.04027	2.05661	2.3994	5e-05	0.000280515	yes
PRDX1	par72	vir_par72	OK	775.398	1593.25	1.03896	2.05475	3.27014	5e-05	0.000280515	yes
RNASEH1P2	par72	vir_par72	OK	1.41051	2.89818	1.03893	2.0547	1.64698	0.0002	0.00102556	yes
ZNF746	par72	vir_par72	OK	2.85355	5.86094	1.03837	2.05391	1.82378	5e-05	0.000280515	yes
ADNP2	par72	vir_par72	OK	13.9578	28.6534	1.03764	2.05287	3.02959	5e-05	0.000280515	yes
MPP5	par72	vir_par72	OK	24.6279	50.5449	1.03727	2.05234	1.4032	5e-05	0.000280515	yes
KCTD10	par72	vir_par72	OK	25.8841	53.1093	1.0369	2.05181	1.75837	5e-05	0.000280515	yes
KALRN	par72	vir_par72	OK	2.87468	5.89833	1.0369	2.05181	1.97495	5e-05	0.000280515	yes
BCL2L10	par72	vir_par72	OK	0.567676	1.16456	1.03665	2.05146	1.32881	0.0014	0.00601694	yes
DENND3	par72	vir_par72	OK	4.95478	10.1626	1.03638	2.05107	1.49143	5e-05	0.000280515	yes
R3HCC1L	par72	vir_par72	OK	5.2568	10.7799	1.03609	2.05066	2.89483	5e-05	0.000280515	yes
FAHD2A	par72	vir_par72	OK	2.66054	5.45334	1.03542	2.04971	1.41894	0.0009	0.00404232	yes
MTRR	par72	vir_par72	OK	30.4515	62.4087	1.03523	2.04944	1.93688	5e-05	0.000280515	yes
PLK1S1	par72	vir_par72	OK	18.026	36.9424	1.0352	2.0494	1.82885	5e-05	0.000280515	yes
ARHGAP42	par72	vir_par72	OK	3.60842	7.39421	1.03503	2.04916	1.77565	5e-05	0.000280515	yes
ZNF574	par72	vir_par72	OK	3.30543	6.7716	1.03466	2.04863	2.21737	5e-05	0.000280515	yes
TM2D3	par72	vir_par72	OK	34.3903	70.4465	1.03453	2.04845	2.58772	5e-05	0.000280515	yes
DLST	par72	vir_par72	OK	46.6254	95.5075	1.0345	2.0484	3.11873	5e-05	0.000280515	yes
SLC25A19	par72	vir_par72	OK	13.5547	27.7637	1.03441	2.04828	2.18924	5e-05	0.000280515	yes
RNASEH1	par72	vir_par72	OK	7.11377	14.5701	1.03432	2.04815	2.05145	5e-05	0.000280515	yes
PCNXL2	par72	vir_par72	OK	21.2002	43.4189	1.03424	2.04803	1.30455	5e-05	0.000280515	yes
FEM1C	par72	vir_par72	OK	13.3696	27.38	1.03416	2.04792	3.41292	5e-05	0.000280515	yes
GTF2B	par72	vir_par72	OK	54.6873	111.968	1.03381	2.04742	3.02658	5e-05	0.000280515	yes
KIAA0947	par72	vir_par72	OK	10.9434	22.3898	1.03279	2.04598	2.81874	5e-05	0.000280515	yes
RHOQ	par72	vir_par72	OK	15.9028	32.5282	1.03241	2.04544	1.59378	5e-05	0.000280515	yes
CYP4F11	par72	vir_par72	OK	9.4894	19.4084	1.0323	2.04528	2.97019	5e-05	0.000280515	yes
RP11-407N17.6	par72	vir_par72	OK	3.00618	6.1457	1.03164	2.04435	2.00218	5e-05	0.000280515	yes
TOX2	par72	vir_par72	OK	4.7422	9.69096	1.03108	2.04355	2.13251	5e-05	0.000280515	yes
FAM114A1	par72	vir_par72	OK	34.2774	70.0416	1.03095	2.04337	2.09222	5e-05	0.000280515	yes
CIAPIN1	par72	vir_par72	OK	39.535	80.7796	1.03086	2.04324	1.88819	5e-05	0.000280515	yes
EMC8	par72	vir_par72	OK	15.2552	31.1659	1.03067	2.04297	1.23639	0.0023	0.00938411	yes
PRKRIP1	par72	vir_par72	OK	7.12082	14.543	1.03021	2.04232	2.20743	5e-05	0.000280515	yes
RNF115	par72	vir_par72	OK	13.926	28.4412	1.0302	2.04231	1.6443	5e-05	0.000280515	yes
ANKRD12	par72	vir_par72	OK	9.9523	20.317	1.02959	2.04144	1.21339	5e-05	0.000280515	yes
[truncated: 4,294 more rows]
