# Supplementary material for: Gene expression profile of HCT-8 cells following single or co-infections with Cryptosporidium parvum and bovine coronavirus
Source: Research Square preprint supplement (doi:10.21203/rs.3.rs-2673942/v1), 2023-03-23
Supplement: Supplementary file 2 [file 0ecbb2b8d55532e41fc089ca.xlsx]

## Sheet: 1st-2000_genes_Bio_proc_up
Supplementary table S5: Results from the Gene Ontology (GO) analysis in the category for biological process complete (GObp) and Pathway Enrichment (KEGG pathways) in BCoV infected cells at 72 hpi.
#term ID	term description	observed gene count	background gene count	strength	false discovery rate	matching proteins in your network (IDs)	matching proteins in your network (labels)
GO:0031323	regulation of cellular metabolic process	798	6082	0.16	6.27e-29	9606.ENSP00000013125,9606.ENSP00000014914,9606.ENSP00000056217,9606.ENSP00000157600,9606.ENSP00000157812,9606.ENSP00000158771,9606.ENSP00000164024,9606.ENSP00000164227,9606.ENSP00000166139,9606.ENSP00000171111,9606.ENSP00000179259,9606.ENSP00000185150,9606.ENSP00000196489,9606.ENSP00000198767,9606.ENSP00000199320,9606.ENSP00000200453,9606.ENSP00000209728,9606.ENSP00000211936,9606.ENSP00000212015,…	MAP4K5,GPRC5A,ARHGEF5,LMCD1,PSMC4,DERL2,CELSR3,BCL3,FSTL3,KEAP1,C12orf5,ERLEC1,ZNF416,RRN3,DIMT1,PPP1R15A,CDC6,ZNF184,SIRT1,GADD45B,XBP1,HMOX1,PHF5A,SNAPC1,ALKBH1,NFKBIA,CHMP4B,GLA,EHD4,GABPB1,BRF2,RIPK2,MTMR9,RELB,ERF,NAMPT,SERPINE1,SETX,PPIF,RASD1,NFKB1,ZPR1,PRDM4,CSRNP2,CYP27B1,CDKN1B,GCLC,ZBTB24,GUCA1B,HBEGF,TUSC2,PCGF1,ODC1,CEBPZ,DLX2,MSH6,PRDM2,RGS2,TBPL1,ELL2,ATAD2B,DUSP1,ELF1,EGR1,EGR2,BH…
GO:0080090	regulation of primary metabolic process	784	5982	0.16	3.13e-28	9606.ENSP00000013125,9606.ENSP00000014914,9606.ENSP00000056217,9606.ENSP00000157600,9606.ENSP00000157812,9606.ENSP00000158771,9606.ENSP00000164024,9606.ENSP00000164227,9606.ENSP00000166139,9606.ENSP00000171111,9606.ENSP00000179259,9606.ENSP00000185150,9606.ENSP00000196489,9606.ENSP00000198767,9606.ENSP00000199320,9606.ENSP00000200453,9606.ENSP00000209728,9606.ENSP00000211936,9606.ENSP00000212015,…	MAP4K5,GPRC5A,ARHGEF5,LMCD1,PSMC4,DERL2,CELSR3,BCL3,FSTL3,KEAP1,C12orf5,ERLEC1,ZNF416,RRN3,DIMT1,PPP1R15A,CDC6,ZNF184,SIRT1,GADD45B,XBP1,RHBDD3,HMOX1,PHF5A,SNAPC1,ALKBH1,NFKBIA,EHD4,GABPB1,BRF2,RIPK2,MTMR9,RELB,ERF,NAMPT,SERPINE1,SETX,PPIF,RASD1,NFKB1,ZPR1,PRDM4,CSRNP2,CYP27B1,CDKN1B,GCLC,ZBTB24,GUCA1B,HBEGF,PCGF1,ODC1,CEBPZ,DLX2,MSH6,PRDM2,RGS2,TBPL1,ELL2,ATAD2B,DUSP1,ELF1,EGR1,EGR2,BHLHE41,ORMD…
GO:0044260	cellular macromolecule metabolic process	825	6413	0.15	3.77e-28	9606.ENSP00000013125,9606.ENSP00000053468,9606.ENSP00000157600,9606.ENSP00000157812,9606.ENSP00000158771,9606.ENSP00000164227,9606.ENSP00000166139,9606.ENSP00000171111,9606.ENSP00000185150,9606.ENSP00000196489,9606.ENSP00000198767,9606.ENSP00000199320,9606.ENSP00000200453,9606.ENSP00000209728,9606.ENSP00000209884,9606.ENSP00000211936,9606.ENSP00000212015,9606.ENSP00000215904,9606.ENSP00000216037,…	MAP4K5,MRPS10,LMCD1,PSMC4,DERL2,BCL3,FSTL3,KEAP1,ERLEC1,ZNF416,RRN3,DIMT1,PPP1R15A,CDC6,KLHL20,ZNF184,SIRT1,PDXP,XBP1,JOSD1,RHBDD3,PHF5A,BRD1,SNAPC1,ALKBH1,NFKBIA,CSTF1,CHMP4B,PSMD7,GABPB1,BRF2,RIPK2,RELB,ERF,FKBP14,SETX,PPIF,NFKB1,ZPR1,PRDM4,CSRNP2,CDKN1B,FGFR1OP2,ZBTB24,HARS2,HBEGF,RARS,KLHL18,PCGF1,CEBPZ,DLX2,MSH6,PRDM2,TBPL1,FBXO30,RNF103,STBD1,ELL2,DUSP1,ELF1,ALG5,EGR1,KALRN,EGR2,RNF11,BHLHE…
GO:0019222	regulation of metabolic process	834	6516	0.15	4.76e-28	9606.ENSP00000013125,9606.ENSP00000014914,9606.ENSP00000056217,9606.ENSP00000157600,9606.ENSP00000157812,9606.ENSP00000158771,9606.ENSP00000164024,9606.ENSP00000164227,9606.ENSP00000166139,9606.ENSP00000171111,9606.ENSP00000179259,9606.ENSP00000185150,9606.ENSP00000196489,9606.ENSP00000198767,9606.ENSP00000199320,9606.ENSP00000200453,9606.ENSP00000209728,9606.ENSP00000211936,9606.ENSP00000212015,…	MAP4K5,GPRC5A,ARHGEF5,LMCD1,PSMC4,DERL2,CELSR3,BCL3,FSTL3,KEAP1,C12orf5,ERLEC1,ZNF416,RRN3,DIMT1,PPP1R15A,CDC6,ZNF184,SIRT1,GADD45B,XBP1,RHBDD3,HMOX1,PHF5A,SNAPC1,ALKBH1,NFKBIA,CHMP4B,GLA,EHD4,GABPB1,BRF2,RIPK2,MTMR9,RELB,ERF,NAMPT,SERPINE1,SETX,PPIF,RASD1,NFKB1,ZPR1,PRDM4,CSRNP2,CYP27B1,CDKN1B,GCLC,ZBTB24,GUCA1B,HBEGF,TUSC2,PCGF1,ODC1,CEBPZ,DLX2,MSH6,PRDM2,RGS2,TBPL1,ELL2,ATAD2B,DUSP1,ELF1,EGR1,…
GO:0043170	macromolecule metabolic process	921	7453	0.14	1.2e-27	9606.ENSP00000013125,9606.ENSP00000053468,9606.ENSP00000157600,9606.ENSP00000157812,9606.ENSP00000158771,9606.ENSP00000161006,9606.ENSP00000164227,9606.ENSP00000166139,9606.ENSP00000170564,9606.ENSP00000171111,9606.ENSP00000185150,9606.ENSP00000196489,9606.ENSP00000198767,9606.ENSP00000199320,9606.ENSP00000200453,9606.ENSP00000209728,9606.ENSP00000209884,9606.ENSP00000211936,9606.ENSP00000212015,…	MAP4K5,MRPS10,LMCD1,PSMC4,DERL2,PRSS22,BCL3,FSTL3,GPATCH1,KEAP1,ERLEC1,ZNF416,RRN3,DIMT1,PPP1R15A,CDC6,KLHL20,ZNF184,SIRT1,PDXP,XBP1,RTCB,JOSD1,RHBDD3,PHF5A,BRD1,SNAPC1,ALKBH1,NFKBIA,CSTF1,CHMP4B,PSMD7,GABPB1,BRF2,RIPK2,RELB,ERF,FKBP14,SETX,PPIF,NFKB1,ZPR1,PRDM4,CSRNP2,CDKN1B,FGFR1OP2,ZBTB24,BYSL,HARS2,HBEGF,RARS,KLHL18,PCGF1,CEBPZ,DLX2,MSH6,PRDM2,TBPL1,FBXO30,RNF103,STBD1,ELL2,DDX55,DUSP1,ELF1,A…
GO:0051171	regulation of nitrogen compound metabolic process	764	5827	0.16	1.35e-27	9606.ENSP00000013125,9606.ENSP00000014914,9606.ENSP00000056217,9606.ENSP00000157600,9606.ENSP00000157812,9606.ENSP00000158771,9606.ENSP00000164024,9606.ENSP00000164227,9606.ENSP00000166139,9606.ENSP00000171111,9606.ENSP00000179259,9606.ENSP00000185150,9606.ENSP00000196489,9606.ENSP00000198767,9606.ENSP00000199320,9606.ENSP00000200453,9606.ENSP00000209728,9606.ENSP00000211936,9606.ENSP00000212015,…	MAP4K5,GPRC5A,ARHGEF5,LMCD1,PSMC4,DERL2,CELSR3,BCL3,FSTL3,KEAP1,C12orf5,ERLEC1,ZNF416,RRN3,DIMT1,PPP1R15A,CDC6,ZNF184,SIRT1,GADD45B,XBP1,RHBDD3,HMOX1,PHF5A,SNAPC1,ALKBH1,NFKBIA,GLA,EHD4,GABPB1,BRF2,RIPK2,RELB,ERF,NAMPT,SERPINE1,SETX,PPIF,RASD1,NFKB1,ZPR1,PRDM4,CSRNP2,CDKN1B,GCLC,ZBTB24,GUCA1B,HBEGF,PCGF1,ODC1,CEBPZ,DLX2,MSH6,PRDM2,RGS2,TBPL1,ELL2,ATAD2B,DUSP1,ELF1,EGR1,EGR2,BHLHE41,ORMDL2,SNAI1,E…
GO:0044237	cellular metabolic process	1043	8797	0.12	1.89e-27	9606.ENSP00000009041,9606.ENSP00000013125,9606.ENSP00000053468,9606.ENSP00000075120,9606.ENSP00000157600,9606.ENSP00000157812,9606.ENSP00000158771,9606.ENSP00000164227,9606.ENSP00000166139,9606.ENSP00000170564,9606.ENSP00000171111,9606.ENSP00000179259,9606.ENSP00000185150,9606.ENSP00000196489,9606.ENSP00000198767,9606.ENSP00000199320,9606.ENSP00000200453,9606.ENSP00000209728,9606.ENSP00000209884,…	STARD3NL,MAP4K5,MRPS10,SLC2A3,LMCD1,PSMC4,DERL2,BCL3,FSTL3,GPATCH1,KEAP1,C12orf5,ERLEC1,ZNF416,RRN3,DIMT1,PPP1R15A,CDC6,KLHL20,NANS,ZNF184,SIRT1,PDXP,XBP1,RTCB,JOSD1,RHBDD3,HMOX1,PHF5A,BRD1,SNAPC1,ALKBH1,NFKBIA,CSTF1,CHMP4B,GLA,PSMD7,GABPB1,VPS18,BRF2,RIPK2,MTMR9,GSR,DHDH,RELB,ERF,NAMPT,FKBP14,CYP3A5,SETX,PPIF,NFKB1,ZPR1,PDHX,PRDM4,CSRNP2,CYP27B1,CDKN1B,FGFR1OP2,GCLC,ZBTB24,BYSL,HARS2,HBEGF,RARS,…
GO:0060255	regulation of macromolecule metabolic process	779	6072	0.15	1.23e-25	9606.ENSP00000013125,9606.ENSP00000014914,9606.ENSP00000056217,9606.ENSP00000157600,9606.ENSP00000157812,9606.ENSP00000158771,9606.ENSP00000164024,9606.ENSP00000164227,9606.ENSP00000166139,9606.ENSP00000171111,9606.ENSP00000179259,9606.ENSP00000185150,9606.ENSP00000196489,9606.ENSP00000198767,9606.ENSP00000199320,9606.ENSP00000200453,9606.ENSP00000209728,9606.ENSP00000211936,9606.ENSP00000212015,…	MAP4K5,GPRC5A,ARHGEF5,LMCD1,PSMC4,DERL2,CELSR3,BCL3,FSTL3,KEAP1,C12orf5,ERLEC1,ZNF416,RRN3,DIMT1,PPP1R15A,CDC6,ZNF184,SIRT1,GADD45B,XBP1,RHBDD3,HMOX1,PHF5A,SNAPC1,ALKBH1,NFKBIA,EHD4,GABPB1,BRF2,RIPK2,MTMR9,RELB,ERF,NAMPT,SERPINE1,SETX,RASD1,NFKB1,ZPR1,PRDM4,CSRNP2,CDKN1B,GCLC,ZBTB24,HBEGF,PCGF1,ODC1,CEBPZ,DLX2,MSH6,PRDM2,RGS2,TBPL1,ELL2,ATAD2B,DUSP1,ELF1,EGR1,EGR2,BHLHE41,ORMDL2,SNAI1,EREG,IRF1,I…
GO:0019219	regulation of nucleobase-containing compound metabolic process	582	4133	0.19	1.62e-25	9606.ENSP00000056217,9606.ENSP00000157600,9606.ENSP00000157812,9606.ENSP00000164227,9606.ENSP00000166139,9606.ENSP00000171111,9606.ENSP00000179259,9606.ENSP00000196489,9606.ENSP00000198767,9606.ENSP00000199320,9606.ENSP00000209728,9606.ENSP00000211936,9606.ENSP00000212015,9606.ENSP00000216037,9606.ENSP00000216117,9606.ENSP00000216252,9606.ENSP00000216294,9606.ENSP00000216797,9606.ENSP00000220429,…	ARHGEF5,LMCD1,PSMC4,BCL3,FSTL3,KEAP1,C12orf5,ZNF416,RRN3,DIMT1,CDC6,ZNF184,SIRT1,XBP1,HMOX1,PHF5A,SNAPC1,NFKBIA,GABPB1,BRF2,RIPK2,RELB,ERF,NAMPT,SERPINE1,SETX,PPIF,RASD1,NFKB1,ZPR1,PRDM4,CSRNP2,CDKN1B,GCLC,ZBTB24,GUCA1B,PCGF1,CEBPZ,DLX2,MSH6,PRDM2,TBPL1,ELL2,ATAD2B,DUSP1,ELF1,EGR1,EGR2,BHLHE41,SNAI1,EREG,IRF1,INSIG2,FOSB,PLAGL2,ZNF317,ZNF10,TICAM1,LIF,DLL4,EGLN3,PBX4,RAF1,MED17,SAFB2,ZNF764,GDF15…
GO:0051252	regulation of RNA metabolic process	556	3890	0.2	1.75e-25	9606.ENSP00000056217,9606.ENSP00000157600,9606.ENSP00000157812,9606.ENSP00000164227,9606.ENSP00000166139,9606.ENSP00000171111,9606.ENSP00000196489,9606.ENSP00000198767,9606.ENSP00000199320,9606.ENSP00000209728,9606.ENSP00000211936,9606.ENSP00000212015,9606.ENSP00000216037,9606.ENSP00000216117,9606.ENSP00000216252,9606.ENSP00000216294,9606.ENSP00000216797,9606.ENSP00000220429,9606.ENSP00000220659,…	ARHGEF5,LMCD1,PSMC4,BCL3,FSTL3,KEAP1,ZNF416,RRN3,DIMT1,CDC6,ZNF184,SIRT1,XBP1,HMOX1,PHF5A,SNAPC1,NFKBIA,GABPB1,BRF2,RIPK2,RELB,ERF,NAMPT,SERPINE1,SETX,RASD1,NFKB1,ZPR1,PRDM4,CSRNP2,CDKN1B,GCLC,ZBTB24,PCGF1,CEBPZ,DLX2,PRDM2,TBPL1,ELL2,ATAD2B,ELF1,EGR1,EGR2,BHLHE41,SNAI1,EREG,IRF1,INSIG2,FOSB,PLAGL2,ZNF317,ZNF10,TICAM1,LIF,DLL4,EGLN3,PBX4,RAF1,MED17,SAFB2,ZNF764,GDF15,JUND,SESN2,RARA,THAP1,DNAJB1,R…
GO:0009889	regulation of biosynthetic process	600	4337	0.19	8.23e-25	9606.ENSP00000056217,9606.ENSP00000157600,9606.ENSP00000157812,9606.ENSP00000164227,9606.ENSP00000166139,9606.ENSP00000171111,9606.ENSP00000179259,9606.ENSP00000196489,9606.ENSP00000198767,9606.ENSP00000200453,9606.ENSP00000209728,9606.ENSP00000211936,9606.ENSP00000212015,9606.ENSP00000216037,9606.ENSP00000216117,9606.ENSP00000216252,9606.ENSP00000216294,9606.ENSP00000216489,9606.ENSP00000216797,…	ARHGEF5,LMCD1,PSMC4,BCL3,FSTL3,KEAP1,C12orf5,ZNF416,RRN3,PPP1R15A,CDC6,ZNF184,SIRT1,XBP1,HMOX1,PHF5A,SNAPC1,ALKBH1,NFKBIA,GLA,GABPB1,BRF2,RIPK2,RELB,ERF,NAMPT,SERPINE1,SETX,RASD1,NFKB1,ZPR1,PRDM4,CSRNP2,CYP27B1,CDKN1B,GCLC,ZBTB24,GUCA1B,HBEGF,PCGF1,CEBPZ,DLX2,PRDM2,RGS2,TBPL1,ELL2,ATAD2B,DUSP1,ELF1,EGR1,EGR2,BHLHE41,ORMDL2,SNAI1,EREG,IRF1,INSIG2,FOSB,PLAGL2,ZNF317,ZNF10,TICAM1,LIF,DLL4,FXR2,EGLN3…
GO:0031326	regulation of cellular biosynthetic process	590	4266	0.19	3.08e-24	9606.ENSP00000056217,9606.ENSP00000157600,9606.ENSP00000157812,9606.ENSP00000164227,9606.ENSP00000166139,9606.ENSP00000171111,9606.ENSP00000179259,9606.ENSP00000196489,9606.ENSP00000198767,9606.ENSP00000200453,9606.ENSP00000209728,9606.ENSP00000211936,9606.ENSP00000212015,9606.ENSP00000216037,9606.ENSP00000216117,9606.ENSP00000216252,9606.ENSP00000216294,9606.ENSP00000216489,9606.ENSP00000216797,…	ARHGEF5,LMCD1,PSMC4,BCL3,FSTL3,KEAP1,C12orf5,ZNF416,RRN3,PPP1R15A,CDC6,ZNF184,SIRT1,XBP1,HMOX1,PHF5A,SNAPC1,ALKBH1,NFKBIA,GLA,GABPB1,BRF2,RIPK2,RELB,ERF,NAMPT,SERPINE1,SETX,RASD1,NFKB1,ZPR1,PRDM4,CSRNP2,CYP27B1,CDKN1B,GCLC,ZBTB24,GUCA1B,HBEGF,PCGF1,CEBPZ,DLX2,PRDM2,RGS2,TBPL1,ELL2,ATAD2B,DUSP1,ELF1,EGR1,EGR2,BHLHE41,ORMDL2,SNAI1,EREG,IRF1,INSIG2,FOSB,PLAGL2,ZNF317,ZNF10,TICAM1,LIF,DLL4,FXR2,EGLN3…
GO:0071704	organic substance metabolic process	1055	9135	0.11	1.16e-23	9606.ENSP00000009041,9606.ENSP00000013125,9606.ENSP00000053468,9606.ENSP00000075120,9606.ENSP00000157600,9606.ENSP00000157812,9606.ENSP00000158771,9606.ENSP00000161006,9606.ENSP00000164227,9606.ENSP00000166139,9606.ENSP00000170564,9606.ENSP00000171111,9606.ENSP00000179259,9606.ENSP00000185150,9606.ENSP00000196489,9606.ENSP00000198767,9606.ENSP00000199320,9606.ENSP00000200453,9606.ENSP00000209728,…	STARD3NL,MAP4K5,MRPS10,SLC2A3,LMCD1,PSMC4,DERL2,PRSS22,BCL3,FSTL3,GPATCH1,KEAP1,C12orf5,ERLEC1,ZNF416,RRN3,DIMT1,PPP1R15A,CDC6,KLHL20,NANS,ZNF184,SIRT1,PDXP,XBP1,RTCB,JOSD1,RHBDD3,HMOX1,PHF5A,BRD1,SNAPC1,ALKBH1,NFKBIA,CSTF1,CHMP4B,GLA,PSMD7,GABPB1,BRF2,RIPK2,MTMR9,GSR,DHDH,RELB,ERF,NAMPT,FKBP14,CYP3A5,SETX,PPIF,NFKB1,ZPR1,PDHX,PRDM4,CSRNP2,CYP27B1,CDKN1B,FGFR1OP2,GCLC,ZBTB24,BYSL,HARS2,HBEGF,RARS…
GO:1903506	regulation of nucleic acid-templated transcription	525	3683	0.2	1.82e-23	9606.ENSP00000056217,9606.ENSP00000157600,9606.ENSP00000157812,9606.ENSP00000164227,9606.ENSP00000166139,9606.ENSP00000171111,9606.ENSP00000196489,9606.ENSP00000198767,9606.ENSP00000209728,9606.ENSP00000211936,9606.ENSP00000212015,9606.ENSP00000216037,9606.ENSP00000216117,9606.ENSP00000216252,9606.ENSP00000216294,9606.ENSP00000216797,9606.ENSP00000220429,9606.ENSP00000220659,9606.ENSP00000220751,…	ARHGEF5,LMCD1,PSMC4,BCL3,FSTL3,KEAP1,ZNF416,RRN3,CDC6,ZNF184,SIRT1,XBP1,HMOX1,PHF5A,SNAPC1,NFKBIA,GABPB1,BRF2,RIPK2,RELB,ERF,NAMPT,SERPINE1,SETX,RASD1,NFKB1,ZPR1,PRDM4,CSRNP2,CDKN1B,GCLC,ZBTB24,PCGF1,CEBPZ,DLX2,PRDM2,TBPL1,ELL2,ATAD2B,ELF1,EGR1,EGR2,BHLHE41,SNAI1,EREG,IRF1,INSIG2,FOSB,PLAGL2,ZNF317,ZNF10,TICAM1,LIF,DLL4,EGLN3,PBX4,RAF1,MED17,SAFB2,ZNF764,GDF15,JUND,SESN2,RARA,THAP1,DNAJB1,RRP8,PE…
GO:0006807	nitrogen compound metabolic process	981	8349	0.12	3.95e-23	9606.ENSP00000013125,9606.ENSP00000053468,9606.ENSP00000157600,9606.ENSP00000157812,9606.ENSP00000158771,9606.ENSP00000161006,9606.ENSP00000164227,9606.ENSP00000166139,9606.ENSP00000170564,9606.ENSP00000171111,9606.ENSP00000185150,9606.ENSP00000196489,9606.ENSP00000198767,9606.ENSP00000199320,9606.ENSP00000200453,9606.ENSP00000209728,9606.ENSP00000209884,9606.ENSP00000210444,9606.ENSP00000211936,…	MAP4K5,MRPS10,LMCD1,PSMC4,DERL2,PRSS22,BCL3,FSTL3,GPATCH1,KEAP1,ERLEC1,ZNF416,RRN3,DIMT1,PPP1R15A,CDC6,KLHL20,NANS,ZNF184,SIRT1,PDXP,XBP1,RTCB,JOSD1,RHBDD3,HMOX1,PHF5A,BRD1,SNAPC1,ALKBH1,NFKBIA,CSTF1,CHMP4B,GLA,PSMD7,GABPB1,BRF2,RIPK2,GSR,RELB,ERF,NAMPT,FKBP14,CYP3A5,SETX,PPIF,NFKB1,ZPR1,PDHX,PRDM4,CSRNP2,CDKN1B,FGFR1OP2,GCLC,ZBTB24,BYSL,HARS2,HBEGF,RARS,UMPS,KLHL18,PCGF1,ODC1,CEBPZ,DLX2,MSH6,PRD…
GO:0010556	regulation of macromolecule biosynthetic process	571	4143	0.18	5.84e-23	9606.ENSP00000056217,9606.ENSP00000157600,9606.ENSP00000157812,9606.ENSP00000164227,9606.ENSP00000166139,9606.ENSP00000171111,9606.ENSP00000196489,9606.ENSP00000198767,9606.ENSP00000200453,9606.ENSP00000209728,9606.ENSP00000211936,9606.ENSP00000212015,9606.ENSP00000216037,9606.ENSP00000216117,9606.ENSP00000216252,9606.ENSP00000216294,9606.ENSP00000216489,9606.ENSP00000216797,9606.ENSP00000220429,…	ARHGEF5,LMCD1,PSMC4,BCL3,FSTL3,KEAP1,ZNF416,RRN3,PPP1R15A,CDC6,ZNF184,SIRT1,XBP1,HMOX1,PHF5A,SNAPC1,ALKBH1,NFKBIA,GABPB1,BRF2,RIPK2,RELB,ERF,NAMPT,SERPINE1,SETX,RASD1,NFKB1,ZPR1,PRDM4,CSRNP2,CDKN1B,GCLC,ZBTB24,HBEGF,PCGF1,CEBPZ,DLX2,PRDM2,RGS2,TBPL1,ELL2,ATAD2B,DUSP1,ELF1,EGR1,EGR2,BHLHE41,ORMDL2,SNAI1,EREG,IRF1,INSIG2,FOSB,PLAGL2,ZNF317,ZNF10,TICAM1,LIF,DLL4,FXR2,EGLN3,PBX4,RAF1,MED17,SAFB2,ZNF7…
GO:2000112	regulation of cellular macromolecule biosynthetic process	560	4050	0.19	1.04e-22	9606.ENSP00000056217,9606.ENSP00000157600,9606.ENSP00000157812,9606.ENSP00000164227,9606.ENSP00000166139,9606.ENSP00000171111,9606.ENSP00000196489,9606.ENSP00000198767,9606.ENSP00000200453,9606.ENSP00000209728,9606.ENSP00000211936,9606.ENSP00000212015,9606.ENSP00000216037,9606.ENSP00000216117,9606.ENSP00000216252,9606.ENSP00000216294,9606.ENSP00000216489,9606.ENSP00000216797,9606.ENSP00000220429,…	ARHGEF5,LMCD1,PSMC4,BCL3,FSTL3,KEAP1,ZNF416,RRN3,PPP1R15A,CDC6,ZNF184,SIRT1,XBP1,HMOX1,PHF5A,SNAPC1,ALKBH1,NFKBIA,GABPB1,BRF2,RIPK2,RELB,ERF,NAMPT,SERPINE1,SETX,RASD1,NFKB1,ZPR1,PRDM4,CSRNP2,CDKN1B,GCLC,ZBTB24,HBEGF,PCGF1,CEBPZ,DLX2,PRDM2,RGS2,TBPL1,ELL2,ATAD2B,DUSP1,ELF1,EGR1,EGR2,BHLHE41,SNAI1,EREG,IRF1,INSIG2,FOSB,PLAGL2,ZNF317,ZNF10,TICAM1,LIF,DLL4,FXR2,EGLN3,PBX4,RAF1,MED17,SAFB2,ZNF764,GDF1…
GO:0006355	regulation of transcription, DNA-templated	519	3661	0.2	1.04e-22	9606.ENSP00000056217,9606.ENSP00000157600,9606.ENSP00000157812,9606.ENSP00000164227,9606.ENSP00000166139,9606.ENSP00000171111,9606.ENSP00000196489,9606.ENSP00000198767,9606.ENSP00000209728,9606.ENSP00000211936,9606.ENSP00000212015,9606.ENSP00000216037,9606.ENSP00000216117,9606.ENSP00000216252,9606.ENSP00000216294,9606.ENSP00000216797,9606.ENSP00000220429,9606.ENSP00000220659,9606.ENSP00000220751,…	ARHGEF5,LMCD1,PSMC4,BCL3,FSTL3,KEAP1,ZNF416,RRN3,CDC6,ZNF184,SIRT1,XBP1,HMOX1,PHF5A,SNAPC1,NFKBIA,GABPB1,BRF2,RIPK2,RELB,ERF,NAMPT,SERPINE1,SETX,RASD1,NFKB1,ZPR1,PRDM4,CSRNP2,CDKN1B,GCLC,ZBTB24,PCGF1,CEBPZ,DLX2,PRDM2,TBPL1,ELL2,ATAD2B,ELF1,EGR1,EGR2,BHLHE41,SNAI1,EREG,IRF1,INSIG2,FOSB,PLAGL2,ZNF317,ZNF10,TICAM1,LIF,DLL4,EGLN3,PBX4,RAF1,MED17,SAFB2,ZNF764,GDF15,JUND,SESN2,RARA,THAP1,DNAJB1,RRP8,PE…
GO:0016070	RNA metabolic process	494	3430	0.2	1.07e-22	9606.ENSP00000157600,9606.ENSP00000164227,9606.ENSP00000166139,9606.ENSP00000170564,9606.ENSP00000171111,9606.ENSP00000196489,9606.ENSP00000198767,9606.ENSP00000199320,9606.ENSP00000211936,9606.ENSP00000212015,9606.ENSP00000216037,9606.ENSP00000216038,9606.ENSP00000216252,9606.ENSP00000216294,9606.ENSP00000216489,9606.ENSP00000217109,9606.ENSP00000220429,9606.ENSP00000220659,9606.ENSP00000221452,…	LMCD1,BCL3,FSTL3,GPATCH1,KEAP1,ZNF416,RRN3,DIMT1,ZNF184,SIRT1,XBP1,RTCB,PHF5A,SNAPC1,ALKBH1,CSTF1,GABPB1,BRF2,RELB,ERF,SETX,NFKB1,ZPR1,PRDM4,CSRNP2,ZBTB24,BYSL,HARS2,RARS,PCGF1,CEBPZ,DLX2,PRDM2,TBPL1,ELL2,DDX55,ELF1,EGR1,EGR2,BHLHE41,MPHOSPH10,EREG,IRF1,FOSB,PLAGL2,ZNF317,ZNF10,PBX4,DHX29,MED17,SAFB2,ZNF764,JUND,ZCCHC9,RARA,THAP1,RRP8,PER2,IGHMBP2,MED10,ELP3,MBD2,BHLHE40,PRPF38A,TBX3,BACH2,AKIRIN…
GO:0008152	metabolic process	1088	9569	0.1	1.1e-22	9606.ENSP00000009041,9606.ENSP00000013125,9606.ENSP00000053468,9606.ENSP00000075120,9606.ENSP00000157600,9606.ENSP00000157812,9606.ENSP00000158771,9606.ENSP00000161006,9606.ENSP00000164227,9606.ENSP00000166139,9606.ENSP00000170564,9606.ENSP00000171111,9606.ENSP00000179259,9606.ENSP00000185150,9606.ENSP00000196489,9606.ENSP00000198767,9606.ENSP00000199320,9606.ENSP00000200453,9606.ENSP00000209728,…	STARD3NL,MAP4K5,MRPS10,SLC2A3,LMCD1,PSMC4,DERL2,PRSS22,BCL3,FSTL3,GPATCH1,KEAP1,C12orf5,ERLEC1,ZNF416,RRN3,DIMT1,PPP1R15A,CDC6,KLHL20,NANS,ZNF184,SIRT1,PDXP,XBP1,RTCB,JOSD1,RHBDD3,HMOX1,PHF5A,BRD1,SNAPC1,ALKBH1,NFKBIA,CSTF1,CHMP4B,GLA,PSMD7,GABPB1,VPS18,BRF2,RIPK2,MTMR9,GSR,DHDH,RELB,ERF,NAMPT,FKBP14,CYP3A5,SETX,PPIF,NFKB1,ZPR1,PDHX,PRDM4,CSRNP2,CYP27B1,CDKN1B,FGFR1OP2,GCLC,ZBTB24,BYSL,HARS2,HBEG…
GO:0010468	regulation of gene expression	609	4533	0.17	1.53e-22	9606.ENSP00000056217,9606.ENSP00000157600,9606.ENSP00000157812,9606.ENSP00000164227,9606.ENSP00000166139,9606.ENSP00000171111,9606.ENSP00000196489,9606.ENSP00000198767,9606.ENSP00000199320,9606.ENSP00000200453,9606.ENSP00000209728,9606.ENSP00000211936,9606.ENSP00000212015,9606.ENSP00000216037,9606.ENSP00000216117,9606.ENSP00000216252,9606.ENSP00000216294,9606.ENSP00000216489,9606.ENSP00000216797,…	ARHGEF5,LMCD1,PSMC4,BCL3,FSTL3,KEAP1,ZNF416,RRN3,DIMT1,PPP1R15A,CDC6,ZNF184,SIRT1,XBP1,HMOX1,PHF5A,SNAPC1,ALKBH1,NFKBIA,GABPB1,BRF2,RIPK2,RELB,ERF,NAMPT,SERPINE1,SETX,RASD1,NFKB1,ZPR1,PRDM4,CSRNP2,CDKN1B,GCLC,ZBTB24,PCGF1,CEBPZ,DLX2,PRDM2,RGS2,TBPL1,ELL2,ATAD2B,ELF1,EGR1,EGR2,BHLHE41,SNAI1,EREG,IRF1,INSIG2,FOSB,PLAGL2,ZNF317,ZNF10,TICAM1,LIF,DLL4,FXR2,EGLN3,PBX4,RAF1,MED17,SAFB2,ZNF764,GDF15,JUND…
GO:0044238	primary metabolic process	1018	8808	0.11	2.58e-22	9606.ENSP00000009041,9606.ENSP00000013125,9606.ENSP00000053468,9606.ENSP00000075120,9606.ENSP00000157600,9606.ENSP00000157812,9606.ENSP00000158771,9606.ENSP00000161006,9606.ENSP00000164227,9606.ENSP00000166139,9606.ENSP00000170564,9606.ENSP00000171111,9606.ENSP00000185150,9606.ENSP00000196489,9606.ENSP00000198767,9606.ENSP00000199320,9606.ENSP00000200453,9606.ENSP00000209728,9606.ENSP00000209884,…	STARD3NL,MAP4K5,MRPS10,SLC2A3,LMCD1,PSMC4,DERL2,PRSS22,BCL3,FSTL3,GPATCH1,KEAP1,ERLEC1,ZNF416,RRN3,DIMT1,PPP1R15A,CDC6,KLHL20,NANS,ZNF184,SIRT1,PDXP,XBP1,RTCB,JOSD1,RHBDD3,PHF5A,BRD1,SNAPC1,ALKBH1,NFKBIA,CSTF1,CHMP4B,GLA,PSMD7,GABPB1,BRF2,RIPK2,MTMR9,GSR,DHDH,RELB,ERF,NAMPT,FKBP14,CYP3A5,SETX,PPIF,NFKB1,ZPR1,PDHX,PRDM4,CSRNP2,CYP27B1,CDKN1B,FGFR1OP2,GCLC,ZBTB24,BYSL,HARS2,HBEGF,RARS,UMPS,KLHL18,P…
GO:0010467	gene expression	519	3733	0.19	4.48e-21	9606.ENSP00000053468,9606.ENSP00000157600,9606.ENSP00000164227,9606.ENSP00000166139,9606.ENSP00000170564,9606.ENSP00000171111,9606.ENSP00000196489,9606.ENSP00000198767,9606.ENSP00000199320,9606.ENSP00000211936,9606.ENSP00000212015,9606.ENSP00000216037,9606.ENSP00000216038,9606.ENSP00000216252,9606.ENSP00000216294,9606.ENSP00000216489,9606.ENSP00000217109,9606.ENSP00000220429,9606.ENSP00000220659,…	MRPS10,LMCD1,BCL3,FSTL3,GPATCH1,KEAP1,ZNF416,RRN3,DIMT1,ZNF184,SIRT1,XBP1,RTCB,PHF5A,SNAPC1,ALKBH1,CSTF1,GABPB1,BRF2,RIPK2,RELB,ERF,SETX,NFKB1,ZPR1,PRDM4,CSRNP2,ZBTB24,BYSL,HARS2,RARS,PCGF1,CEBPZ,DLX2,PRDM2,TBPL1,ELL2,ELF1,EGR1,EGR2,BHLHE41,MPHOSPH10,EREG,IRF1,FOSB,PLAGL2,ZNF317,ZNF10,PBX4,DHX29,MED17,SAFB2,ZNF764,JUND,ZCCHC9,RARA,THAP1,RRP8,PER2,NXT1,IGHMBP2,MED10,EIF2S1,ELP3,MBD2,BHLHE40,PRPF38…
GO:0009893	positive regulation of metabolic process	462	3280	0.19	4.09e-19	9606.ENSP00000013125,9606.ENSP00000056217,9606.ENSP00000157812,9606.ENSP00000164227,9606.ENSP00000166139,9606.ENSP00000171111,9606.ENSP00000179259,9606.ENSP00000198767,9606.ENSP00000199320,9606.ENSP00000200453,9606.ENSP00000209728,9606.ENSP00000212015,9606.ENSP00000215631,9606.ENSP00000216037,9606.ENSP00000216085,9606.ENSP00000216117,9606.ENSP00000216252,9606.ENSP00000216797,9606.ENSP00000220325,…	MAP4K5,ARHGEF5,PSMC4,BCL3,FSTL3,KEAP1,C12orf5,RRN3,DIMT1,PPP1R15A,CDC6,SIRT1,GADD45B,XBP1,RHBDD3,HMOX1,PHF5A,NFKBIA,EHD4,GABPB1,RIPK2,MTMR9,RELB,NAMPT,SERPINE1,SETX,NFKB1,ZPR1,PRDM4,CSRNP2,CYP27B1,CDKN1B,GCLC,GUCA1B,HBEGF,CEBPZ,DLX2,MSH6,PRDM2,TBPL1,ATAD2B,ELF1,EGR1,EGR2,SNAI1,EREG,IRF1,INSIG2,FOSB,PLAGL2,TICAM1,LIF,DLL4,EGLN3,PBX4,RAF1,MED17,GDF15,JUND,SESN2,RARA,PER2,KDM6B,JAG1,MED10,IRAK2,ADAM…
GO:0010604	positive regulation of macromolecule metabolic process	438	3081	0.2	1.5e-18	9606.ENSP00000013125,9606.ENSP00000056217,9606.ENSP00000157812,9606.ENSP00000164227,9606.ENSP00000166139,9606.ENSP00000171111,9606.ENSP00000179259,9606.ENSP00000198767,9606.ENSP00000199320,9606.ENSP00000200453,9606.ENSP00000209728,9606.ENSP00000212015,9606.ENSP00000215631,9606.ENSP00000216037,9606.ENSP00000216085,9606.ENSP00000216117,9606.ENSP00000216252,9606.ENSP00000216797,9606.ENSP00000220325,…	MAP4K5,ARHGEF5,PSMC4,BCL3,FSTL3,KEAP1,C12orf5,RRN3,DIMT1,PPP1R15A,CDC6,SIRT1,GADD45B,XBP1,RHBDD3,HMOX1,PHF5A,NFKBIA,EHD4,GABPB1,RIPK2,RELB,NAMPT,SERPINE1,SETX,NFKB1,ZPR1,PRDM4,CSRNP2,CDKN1B,GCLC,HBEGF,CEBPZ,DLX2,MSH6,PRDM2,TBPL1,ATAD2B,ELF1,EGR1,EGR2,SNAI1,EREG,IRF1,INSIG2,FOSB,PLAGL2,TICAM1,LIF,DLL4,EGLN3,PBX4,RAF1,MED17,GDF15,JUND,SESN2,RARA,PER2,KDM6B,JAG1,MED10,IRAK2,ADAM19,TBX3,AKIRIN2,RIPK1…
GO:0051173	positive regulation of nitrogen compound metabolic process	422	2946	0.2	2.95e-18	9606.ENSP00000013125,9606.ENSP00000056217,9606.ENSP00000157812,9606.ENSP00000164227,9606.ENSP00000166139,9606.ENSP00000171111,9606.ENSP00000179259,9606.ENSP00000198767,9606.ENSP00000199320,9606.ENSP00000200453,9606.ENSP00000209728,9606.ENSP00000212015,9606.ENSP00000215631,9606.ENSP00000216037,9606.ENSP00000216085,9606.ENSP00000216117,9606.ENSP00000216252,9606.ENSP00000216797,9606.ENSP00000220325,…	MAP4K5,ARHGEF5,PSMC4,BCL3,FSTL3,KEAP1,C12orf5,RRN3,DIMT1,PPP1R15A,CDC6,SIRT1,GADD45B,XBP1,RHBDD3,HMOX1,PHF5A,NFKBIA,EHD4,GABPB1,RIPK2,RELB,NAMPT,SERPINE1,SETX,NFKB1,ZPR1,PRDM4,CSRNP2,CDKN1B,GCLC,GUCA1B,HBEGF,CEBPZ,DLX2,MSH6,PRDM2,TBPL1,ATAD2B,ELF1,EGR1,EGR2,SNAI1,EREG,IRF1,INSIG2,FOSB,PLAGL2,TICAM1,LIF,EGLN3,PBX4,RAF1,MED17,GDF15,JUND,SESN2,RARA,PER2,KDM6B,JAG1,MED10,IRAK2,TBX3,AKIRIN2,RIPK1,SDCB…
GO:0006351	transcription, DNA-templated	379	2569	0.21	6.76e-18	9606.ENSP00000157600,9606.ENSP00000164227,9606.ENSP00000166139,9606.ENSP00000171111,9606.ENSP00000196489,9606.ENSP00000198767,9606.ENSP00000211936,9606.ENSP00000212015,9606.ENSP00000216037,9606.ENSP00000216252,9606.ENSP00000216294,9606.ENSP00000217109,9606.ENSP00000220429,9606.ENSP00000220659,9606.ENSP00000221452,9606.ENSP00000222329,9606.ENSP00000224140,9606.ENSP00000226574,9606.ENSP00000228437,…	LMCD1,BCL3,FSTL3,KEAP1,ZNF416,RRN3,ZNF184,SIRT1,XBP1,PHF5A,SNAPC1,CSTF1,GABPB1,BRF2,RELB,ERF,SETX,NFKB1,PRDM4,CSRNP2,ZBTB24,PCGF1,CEBPZ,DLX2,PRDM2,TBPL1,ELL2,ELF1,EGR1,EGR2,BHLHE41,EREG,IRF1,FOSB,PLAGL2,ZNF317,ZNF10,PBX4,MED17,SAFB2,ZNF764,JUND,ZCCHC9,RARA,THAP1,RRP8,PER2,IGHMBP2,MED10,ELP3,MBD2,BHLHE40,TBX3,BACH2,AKIRIN2,PREB,ZNF430,LHX5,ADNP2,TRIM37,ELL,EPC1,MED15,BRD4,MED26,ARID3A,CCNT2,ARID4B…
GO:0006357	regulation of transcription by RNA polymerase II	386	2633	0.21	6.82e-18	9606.ENSP00000157600,9606.ENSP00000157812,9606.ENSP00000164227,9606.ENSP00000166139,9606.ENSP00000196489,9606.ENSP00000211936,9606.ENSP00000212015,9606.ENSP00000216037,9606.ENSP00000216117,9606.ENSP00000216797,9606.ENSP00000220429,9606.ENSP00000220751,9606.ENSP00000221452,9606.ENSP00000222329,9606.ENSP00000222553,9606.ENSP00000223095,9606.ENSP00000224140,9606.ENSP00000226574,9606.ENSP00000228437,…	LMCD1,PSMC4,BCL3,FSTL3,ZNF416,ZNF184,SIRT1,XBP1,HMOX1,NFKBIA,GABPB1,RIPK2,RELB,ERF,NAMPT,SERPINE1,SETX,NFKB1,PRDM4,CSRNP2,ZBTB24,CEBPZ,DLX2,PRDM2,TBPL1,ATAD2B,ELF1,EGR1,EGR2,BHLHE41,SNAI1,IRF1,INSIG2,FOSB,PLAGL2,ZNF317,ZNF10,LIF,DLL4,EGLN3,PBX4,RAF1,MED17,SAFB2,ZNF764,GDF15,JUND,SESN2,RARA,THAP1,DNAJB1,PER2,KDM6B,JAG1,MED10,ELP3,MBD2,BHLHE40,TBX3,BACH2,AKIRIN2,RIPK1,USP2,ZNF430,LHX5,ADNP2,TRIM37,…
GO:0090304	nucleic acid metabolic process	524	3941	0.17	1.37e-17	9606.ENSP00000157600,9606.ENSP00000164227,9606.ENSP00000166139,9606.ENSP00000170564,9606.ENSP00000171111,9606.ENSP00000196489,9606.ENSP00000198767,9606.ENSP00000199320,9606.ENSP00000209728,9606.ENSP00000211936,9606.ENSP00000212015,9606.ENSP00000216037,9606.ENSP00000216038,9606.ENSP00000216252,9606.ENSP00000216294,9606.ENSP00000216489,9606.ENSP00000217109,9606.ENSP00000220429,9606.ENSP00000220659,…	LMCD1,BCL3,FSTL3,GPATCH1,KEAP1,ZNF416,RRN3,DIMT1,CDC6,ZNF184,SIRT1,XBP1,RTCB,PHF5A,SNAPC1,ALKBH1,CSTF1,GABPB1,BRF2,RELB,ERF,SETX,NFKB1,ZPR1,PRDM4,CSRNP2,ZBTB24,BYSL,HARS2,RARS,PCGF1,CEBPZ,DLX2,MSH6,PRDM2,TBPL1,ELL2,DDX55,ELF1,EGR1,EGR2,BHLHE41,MPHOSPH10,EREG,IRF1,FOSB,PLAGL2,ZNF317,ZNF10,CDADC1,PBX4,DHX29,MED17,SAFB2,ZNF764,JUND,SESN2,GRWD1,ZCCHC9,RARA,THAP1,RRP8,PER2,IGHMBP2,MED10,ELP3,MBD2,BHLH…
GO:0031325	positive regulation of cellular metabolic process	431	3060	0.19	1.37e-17	9606.ENSP00000013125,9606.ENSP00000056217,9606.ENSP00000157812,9606.ENSP00000164227,9606.ENSP00000166139,9606.ENSP00000171111,9606.ENSP00000179259,9606.ENSP00000198767,9606.ENSP00000199320,9606.ENSP00000200453,9606.ENSP00000209728,9606.ENSP00000212015,9606.ENSP00000215631,9606.ENSP00000216037,9606.ENSP00000216117,9606.ENSP00000216252,9606.ENSP00000216797,9606.ENSP00000220325,9606.ENSP00000220429,…	MAP4K5,ARHGEF5,PSMC4,BCL3,FSTL3,KEAP1,C12orf5,RRN3,DIMT1,PPP1R15A,CDC6,SIRT1,GADD45B,XBP1,HMOX1,PHF5A,NFKBIA,EHD4,GABPB1,RIPK2,MTMR9,RELB,NAMPT,SERPINE1,SETX,NFKB1,ZPR1,PRDM4,CSRNP2,CDKN1B,GCLC,GUCA1B,HBEGF,CEBPZ,DLX2,MSH6,PRDM2,TBPL1,ATAD2B,ELF1,EGR1,EGR2,SNAI1,EREG,IRF1,INSIG2,FOSB,PLAGL2,TICAM1,LIF,EGLN3,PBX4,RAF1,MED17,GDF15,JUND,SESN2,RARA,PER2,KDM6B,JAG1,MED10,IRAK2,TBX3,AKIRIN2,RIPK1,SDCBP…
GO:0051254	positive regulation of RNA metabolic process	259	1596	0.26	8.6e-16	9606.ENSP00000157812,9606.ENSP00000164227,9606.ENSP00000166139,9606.ENSP00000198767,9606.ENSP00000199320,9606.ENSP00000212015,9606.ENSP00000216037,9606.ENSP00000216252,9606.ENSP00000216797,9606.ENSP00000220429,9606.ENSP00000220751,9606.ENSP00000221452,9606.ENSP00000222553,9606.ENSP00000223095,9606.ENSP00000224140,9606.ENSP00000226574,9606.ENSP00000227322,9606.ENSP00000228437,9606.ENSP00000228515,…	PSMC4,BCL3,FSTL3,RRN3,DIMT1,SIRT1,XBP1,PHF5A,NFKBIA,GABPB1,RIPK2,RELB,NAMPT,SERPINE1,SETX,NFKB1,ZPR1,PRDM4,CSRNP2,CEBPZ,DLX2,PRDM2,TBPL1,ATAD2B,ELF1,EGR1,EGR2,SNAI1,IRF1,INSIG2,FOSB,PLAGL2,LIF,PBX4,RAF1,MED17,JUND,SESN2,RARA,PER2,KDM6B,JAG1,MED10,TBX3,AKIRIN2,RIPK1,LHX5,NLRC5,ELL,C19orf10,EPC1,IL1A,BRD4,MED26,ARID3A,ACVR1,SLC9A1,CCNT2,ARID4B,IL11,FOSL2,LEF1,SRF,CREM,GAL,GTF2H1,GMEB2,TEF,ARNTL2,TR…
GO:0043412	macromolecule modification	437	3197	0.18	8.97e-16	9606.ENSP00000013125,9606.ENSP00000157812,9606.ENSP00000158771,9606.ENSP00000166139,9606.ENSP00000171111,9606.ENSP00000199320,9606.ENSP00000200453,9606.ENSP00000209884,9606.ENSP00000212015,9606.ENSP00000215904,9606.ENSP00000216039,9606.ENSP00000216085,9606.ENSP00000216267,9606.ENSP00000216489,9606.ENSP00000216797,9606.ENSP00000219313,9606.ENSP00000220751,9606.ENSP00000222803,9606.ENSP00000224140,…	MAP4K5,PSMC4,DERL2,FSTL3,KEAP1,DIMT1,PPP1R15A,KLHL20,SIRT1,PDXP,JOSD1,RHBDD3,BRD1,ALKBH1,NFKBIA,PSMD7,RIPK2,FKBP14,SETX,PPIF,NFKB1,PRDM4,CDKN1B,FGFR1OP2,HBEGF,KLHL18,PCGF1,PRDM2,FBXO30,RNF103,DUSP1,ALG5,KALRN,EGR2,RNF11,EREG,WNK4,FBXL12,SDF2L1,LIF,EGLN3,CDADC1,RAF1,TRPC4AP,RARA,PRKAB2,ILKAP,PER2,KDM6B,USPL1,MED10,BTG1,RNF122,EIF2S1,ELP3,MBD2,IRAK2,BACH2,COG3,TBRG4,HUS1,RIPK1,USP2,DCUN1D5,THBS1,TT…
GO:0034645	cellular macromolecule biosynthetic process	470	3518	0.17	1.29e-15	9606.ENSP00000053468,9606.ENSP00000157600,9606.ENSP00000164227,9606.ENSP00000166139,9606.ENSP00000171111,9606.ENSP00000196489,9606.ENSP00000198767,9606.ENSP00000209728,9606.ENSP00000211936,9606.ENSP00000212015,9606.ENSP00000216037,9606.ENSP00000216252,9606.ENSP00000216294,9606.ENSP00000217109,9606.ENSP00000220429,9606.ENSP00000220659,9606.ENSP00000221452,9606.ENSP00000222329,9606.ENSP00000224140,…	MRPS10,LMCD1,BCL3,FSTL3,KEAP1,ZNF416,RRN3,CDC6,ZNF184,SIRT1,XBP1,PHF5A,SNAPC1,CSTF1,GABPB1,BRF2,RELB,ERF,SETX,NFKB1,ZPR1,PRDM4,CSRNP2,ZBTB24,HARS2,RARS,PCGF1,CEBPZ,DLX2,PRDM2,TBPL1,ELL2,ELF1,ALG5,EGR1,EGR2,BHLHE41,EREG,IRF1,FOSB,PLAGL2,ZNF317,ZNF10,SDF2L1,PBX4,DHX29,MED17,SAFB2,ZNF764,JUND,GRWD1,ZCCHC9,RARA,THAP1,RRP8,PER2,IGHMBP2,MED10,EIF2S1,ELP3,MBD2,BHLHE40,TBX3,BACH2,AKIRIN2,COG3,PREB,ZNF430…
GO:0009059	macromolecule biosynthetic process	474	3576	0.17	3.22e-15	9606.ENSP00000053468,9606.ENSP00000157600,9606.ENSP00000164227,9606.ENSP00000166139,9606.ENSP00000171111,9606.ENSP00000196489,9606.ENSP00000198767,9606.ENSP00000209728,9606.ENSP00000211936,9606.ENSP00000212015,9606.ENSP00000216037,9606.ENSP00000216252,9606.ENSP00000216294,9606.ENSP00000217109,9606.ENSP00000220429,9606.ENSP00000220659,9606.ENSP00000221452,9606.ENSP00000222329,9606.ENSP00000224140,…	MRPS10,LMCD1,BCL3,FSTL3,KEAP1,ZNF416,RRN3,CDC6,ZNF184,SIRT1,XBP1,PHF5A,SNAPC1,CSTF1,GABPB1,BRF2,RELB,ERF,SETX,NFKB1,ZPR1,PRDM4,CSRNP2,ZBTB24,HARS2,RARS,PCGF1,CEBPZ,DLX2,PRDM2,TBPL1,ELL2,ELF1,ALG5,EGR1,EGR2,BHLHE41,EREG,IRF1,FOSB,PLAGL2,ZNF317,ZNF10,SDF2L1,PBX4,DHX29,MED17,SAFB2,ZNF764,JUND,GRWD1,ZCCHC9,RARA,THAP1,RRP8,PER2,IGHMBP2,MED10,EIF2S1,ELP3,MBD2,BHLHE40,TBX3,BACH2,AKIRIN2,COG3,PREB,ZNF430…
GO:0034654	nucleobase-containing compound biosynthetic process	415	3031	0.18	6.52e-15	9606.ENSP00000157600,9606.ENSP00000164227,9606.ENSP00000166139,9606.ENSP00000171111,9606.ENSP00000196489,9606.ENSP00000198767,9606.ENSP00000210444,9606.ENSP00000211936,9606.ENSP00000212015,9606.ENSP00000216037,9606.ENSP00000216252,9606.ENSP00000216294,9606.ENSP00000217109,9606.ENSP00000220429,9606.ENSP00000220659,9606.ENSP00000221452,9606.ENSP00000222329,9606.ENSP00000222553,9606.ENSP00000224140,…	LMCD1,BCL3,FSTL3,KEAP1,ZNF416,RRN3,NANS,ZNF184,SIRT1,XBP1,PHF5A,SNAPC1,CSTF1,GABPB1,BRF2,RELB,ERF,NAMPT,SETX,NFKB1,PDHX,PRDM4,CSRNP2,ZBTB24,UMPS,PCGF1,CEBPZ,DLX2,PRDM2,TBPL1,ELL2,ELF1,EGR1,EGR2,BHLHE41,EREG,IRF1,FOSB,PLAGL2,ZNF317,ZNF10,PBX4,MED17,SAFB2,ZNF764,JUND,ZCCHC9,RARA,THAP1,RRP8,PER2,IGHMBP2,MED10,ELP3,MBD2,BHLHE40,TBX3,BACH2,AKIRIN2,PREB,ZNF430,LHX5,ADNP2,TRIM37,ELL,EPC1,UFD1L,MED15,BRD…
GO:0018130	heterocycle biosynthetic process	420	3095	0.18	1.48e-14	9606.ENSP00000157600,9606.ENSP00000164227,9606.ENSP00000166139,9606.ENSP00000171111,9606.ENSP00000196489,9606.ENSP00000198767,9606.ENSP00000210444,9606.ENSP00000211936,9606.ENSP00000212015,9606.ENSP00000216037,9606.ENSP00000216252,9606.ENSP00000216294,9606.ENSP00000217109,9606.ENSP00000220429,9606.ENSP00000220659,9606.ENSP00000221452,9606.ENSP00000222329,9606.ENSP00000222553,9606.ENSP00000224140,…	LMCD1,BCL3,FSTL3,KEAP1,ZNF416,RRN3,NANS,ZNF184,SIRT1,XBP1,PHF5A,SNAPC1,CSTF1,GABPB1,BRF2,RELB,ERF,NAMPT,SETX,NFKB1,PDHX,PRDM4,CSRNP2,ZBTB24,UMPS,PCGF1,CEBPZ,DLX2,PRDM2,TBPL1,ELL2,ELF1,EGR1,EGR2,BHLHE41,EREG,IRF1,FOSB,PLAGL2,ZNF317,ZNF10,PBX4,MED17,SAFB2,ZNF764,JUND,ZCCHC9,RARA,THAP1,RRP8,PER2,IGHMBP2,MED10,ELP3,MBD2,BHLHE40,TBX3,BACH2,AKIRIN2,PREB,ZNF430,COX10,LHX5,ADNP2,TRIM37,ELL,EPC1,UFD1L,MED…
GO:1903508	positive regulation of nucleic acid-templated transcription	245	1520	0.25	1.48e-14	9606.ENSP00000157812,9606.ENSP00000164227,9606.ENSP00000166139,9606.ENSP00000198767,9606.ENSP00000212015,9606.ENSP00000216037,9606.ENSP00000216252,9606.ENSP00000216797,9606.ENSP00000220429,9606.ENSP00000220751,9606.ENSP00000221452,9606.ENSP00000222553,9606.ENSP00000223095,9606.ENSP00000224140,9606.ENSP00000226574,9606.ENSP00000227322,9606.ENSP00000228437,9606.ENSP00000228515,9606.ENSP00000234170,…	PSMC4,BCL3,FSTL3,RRN3,SIRT1,XBP1,PHF5A,NFKBIA,GABPB1,RIPK2,RELB,NAMPT,SERPINE1,SETX,NFKB1,ZPR1,PRDM4,CSRNP2,CEBPZ,DLX2,PRDM2,TBPL1,ATAD2B,ELF1,EGR1,EGR2,SNAI1,IRF1,INSIG2,FOSB,PLAGL2,LIF,PBX4,RAF1,MED17,JUND,SESN2,RARA,PER2,KDM6B,JAG1,MED10,TBX3,AKIRIN2,RIPK1,LHX5,NLRC5,ELL,C19orf10,EPC1,IL1A,BRD4,MED26,ARID3A,ACVR1,SLC9A1,CCNT2,ARID4B,IL11,FOSL2,LEF1,SRF,CREM,GAL,GTF2H1,GMEB2,TEF,ARNTL2,TRIP11,C…
GO:0045935	positive regulation of nucleobase-containing compound metabolic process	274	1770	0.24	1.51e-14	9606.ENSP00000157812,9606.ENSP00000164227,9606.ENSP00000166139,9606.ENSP00000179259,9606.ENSP00000198767,9606.ENSP00000199320,9606.ENSP00000212015,9606.ENSP00000216037,9606.ENSP00000216252,9606.ENSP00000216797,9606.ENSP00000220429,9606.ENSP00000220751,9606.ENSP00000221452,9606.ENSP00000222553,9606.ENSP00000223095,9606.ENSP00000224140,9606.ENSP00000226574,9606.ENSP00000227322,9606.ENSP00000228437,…	PSMC4,BCL3,FSTL3,C12orf5,RRN3,DIMT1,SIRT1,XBP1,PHF5A,NFKBIA,GABPB1,RIPK2,RELB,NAMPT,SERPINE1,SETX,NFKB1,ZPR1,PRDM4,CSRNP2,GUCA1B,CEBPZ,DLX2,MSH6,PRDM2,TBPL1,ATAD2B,ELF1,EGR1,EGR2,SNAI1,EREG,IRF1,INSIG2,FOSB,PLAGL2,LIF,PBX4,RAF1,MED17,JUND,SESN2,RARA,PER2,KDM6B,JAG1,MED10,TBX3,AKIRIN2,RIPK1,LHX5,NLRC5,ELL,C19orf10,EPC1,IL1A,BRD4,MED26,ARID3A,ACVR1,SLC9A1,CCNT2,ARID4B,IL11,FOSL2,LEF1,SRF,CREM,GAL,G…
GO:1901362	organic cyclic compound biosynthetic process	434	3230	0.17	1.53e-14	9606.ENSP00000009041,9606.ENSP00000157600,9606.ENSP00000164227,9606.ENSP00000166139,9606.ENSP00000171111,9606.ENSP00000196489,9606.ENSP00000198767,9606.ENSP00000210444,9606.ENSP00000211936,9606.ENSP00000212015,9606.ENSP00000216037,9606.ENSP00000216252,9606.ENSP00000216294,9606.ENSP00000217109,9606.ENSP00000220429,9606.ENSP00000220659,9606.ENSP00000221452,9606.ENSP00000222329,9606.ENSP00000222553,…	STARD3NL,LMCD1,BCL3,FSTL3,KEAP1,ZNF416,RRN3,NANS,ZNF184,SIRT1,XBP1,PHF5A,SNAPC1,CSTF1,GABPB1,BRF2,RELB,ERF,NAMPT,SETX,NFKB1,PDHX,PRDM4,CSRNP2,CYP27B1,ZBTB24,UMPS,PCGF1,CEBPZ,DLX2,PRDM2,TBPL1,ELL2,ELF1,EGR1,EGR2,BHLHE41,EREG,IRF1,INSIG2,FOSB,PLAGL2,ZNF317,ZNF10,PBX4,MED17,SAFB2,ZNF764,JUND,ZCCHC9,RARA,THAP1,RRP8,PER2,IGHMBP2,MED10,ELP3,MBD2,BHLHE40,TBX3,BACH2,AKIRIN2,PREB,MSMO1,ZNF430,COX10,LHX5,A…
GO:0019438	aromatic compound biosynthetic process	420	3100	0.18	1.68e-14	9606.ENSP00000157600,9606.ENSP00000164227,9606.ENSP00000166139,9606.ENSP00000171111,9606.ENSP00000196489,9606.ENSP00000198767,9606.ENSP00000210444,9606.ENSP00000211936,9606.ENSP00000212015,9606.ENSP00000216037,9606.ENSP00000216252,9606.ENSP00000216294,9606.ENSP00000217109,9606.ENSP00000220429,9606.ENSP00000220659,9606.ENSP00000221452,9606.ENSP00000222329,9606.ENSP00000222553,9606.ENSP00000224140,…	LMCD1,BCL3,FSTL3,KEAP1,ZNF416,RRN3,NANS,ZNF184,SIRT1,XBP1,PHF5A,SNAPC1,CSTF1,GABPB1,BRF2,RELB,ERF,NAMPT,SETX,NFKB1,PDHX,PRDM4,CSRNP2,ZBTB24,UMPS,PCGF1,CEBPZ,DLX2,PRDM2,TBPL1,ELL2,ELF1,EGR1,EGR2,BHLHE41,EREG,IRF1,FOSB,PLAGL2,ZNF317,ZNF10,PBX4,MED17,SAFB2,ZNF764,JUND,ZCCHC9,RARA,THAP1,RRP8,PER2,IGHMBP2,MED10,ELP3,MBD2,BHLHE40,TBX3,BACH2,AKIRIN2,PREB,ZNF430,COX10,LHX5,ADNP2,TRIM37,ELL,EPC1,UFD1L,MED…
GO:0010628	positive regulation of gene expression	280	1826	0.23	1.75e-14	9606.ENSP00000157812,9606.ENSP00000164227,9606.ENSP00000166139,9606.ENSP00000198767,9606.ENSP00000199320,9606.ENSP00000200453,9606.ENSP00000212015,9606.ENSP00000216037,9606.ENSP00000216252,9606.ENSP00000216797,9606.ENSP00000220429,9606.ENSP00000220751,9606.ENSP00000221452,9606.ENSP00000222553,9606.ENSP00000223095,9606.ENSP00000224140,9606.ENSP00000226574,9606.ENSP00000227322,9606.ENSP00000228437,…	PSMC4,BCL3,FSTL3,RRN3,DIMT1,PPP1R15A,SIRT1,XBP1,PHF5A,NFKBIA,GABPB1,RIPK2,RELB,NAMPT,SERPINE1,SETX,NFKB1,ZPR1,PRDM4,CSRNP2,CEBPZ,DLX2,PRDM2,TBPL1,ATAD2B,ELF1,EGR1,EGR2,SNAI1,IRF1,INSIG2,FOSB,PLAGL2,TICAM1,LIF,DLL4,PBX4,RAF1,MED17,JUND,SESN2,RARA,KDM6B,JAG1,MED10,ADAM19,TBX3,AKIRIN2,RIPK1,THBS1,LHX5,TMED2,NLRC5,ELL,C19orf10,EPC1,IL1A,BRD4,ARID3A,ACVR1,SLC9A1,CCNT2,ARID4B,IL11,FOSL2,LEF1,SRF,CREM,G…
GO:0006464	cellular protein modification process	409	2999	0.18	1.82e-14	9606.ENSP00000013125,9606.ENSP00000157812,9606.ENSP00000158771,9606.ENSP00000166139,9606.ENSP00000171111,9606.ENSP00000200453,9606.ENSP00000209884,9606.ENSP00000212015,9606.ENSP00000215904,9606.ENSP00000216039,9606.ENSP00000216085,9606.ENSP00000216267,9606.ENSP00000216797,9606.ENSP00000219313,9606.ENSP00000220751,9606.ENSP00000222803,9606.ENSP00000224140,9606.ENSP00000225174,9606.ENSP00000226574,…	MAP4K5,PSMC4,DERL2,FSTL3,KEAP1,PPP1R15A,KLHL20,SIRT1,PDXP,JOSD1,RHBDD3,BRD1,NFKBIA,PSMD7,RIPK2,FKBP14,SETX,PPIF,NFKB1,PRDM4,CDKN1B,FGFR1OP2,HBEGF,KLHL18,PCGF1,PRDM2,FBXO30,RNF103,DUSP1,ALG5,KALRN,EGR2,RNF11,EREG,WNK4,FBXL12,SDF2L1,LIF,EGLN3,RAF1,TRPC4AP,RARA,PRKAB2,ILKAP,PER2,KDM6B,USPL1,MED10,BTG1,RNF122,EIF2S1,ELP3,IRAK2,BACH2,COG3,TBRG4,HUS1,RIPK1,USP2,DCUN1D5,THBS1,TTLL7,PSMD11,NAA25,MAPK6,SP…
GO:0045893	positive regulation of transcription, DNA-templated	232	1435	0.25	6.82e-14	9606.ENSP00000157812,9606.ENSP00000164227,9606.ENSP00000166139,9606.ENSP00000198767,9606.ENSP00000212015,9606.ENSP00000216037,9606.ENSP00000216252,9606.ENSP00000216797,9606.ENSP00000220429,9606.ENSP00000220751,9606.ENSP00000221452,9606.ENSP00000222553,9606.ENSP00000223095,9606.ENSP00000224140,9606.ENSP00000226574,9606.ENSP00000227322,9606.ENSP00000228437,9606.ENSP00000228515,9606.ENSP00000234170,…	PSMC4,BCL3,FSTL3,RRN3,SIRT1,XBP1,PHF5A,NFKBIA,GABPB1,RIPK2,RELB,NAMPT,SERPINE1,SETX,NFKB1,ZPR1,PRDM4,CSRNP2,CEBPZ,DLX2,PRDM2,TBPL1,ATAD2B,ELF1,EGR1,EGR2,SNAI1,IRF1,INSIG2,FOSB,PLAGL2,LIF,PBX4,RAF1,MED17,JUND,SESN2,RARA,KDM6B,JAG1,MED10,TBX3,AKIRIN2,RIPK1,LHX5,NLRC5,ELL,C19orf10,EPC1,IL1A,BRD4,ARID3A,ACVR1,SLC9A1,CCNT2,ARID4B,IL11,FOSL2,LEF1,SRF,CREM,GAL,GTF2H1,TEF,ARNTL2,CRTC3,TAF4B,MEF2D,CSRNP1,…
GO:0044271	cellular nitrogen compound biosynthetic process	461	3528	0.16	8.64e-14	9606.ENSP00000053468,9606.ENSP00000157600,9606.ENSP00000164227,9606.ENSP00000166139,9606.ENSP00000171111,9606.ENSP00000196489,9606.ENSP00000198767,9606.ENSP00000210444,9606.ENSP00000211936,9606.ENSP00000212015,9606.ENSP00000216037,9606.ENSP00000216252,9606.ENSP00000216294,9606.ENSP00000217109,9606.ENSP00000220429,9606.ENSP00000220659,9606.ENSP00000221452,9606.ENSP00000222329,9606.ENSP00000222553,…	MRPS10,LMCD1,BCL3,FSTL3,KEAP1,ZNF416,RRN3,NANS,ZNF184,SIRT1,XBP1,PHF5A,SNAPC1,CSTF1,GABPB1,BRF2,RELB,ERF,NAMPT,SETX,NFKB1,PDHX,PRDM4,CSRNP2,GCLC,ZBTB24,HARS2,RARS,UMPS,PCGF1,ODC1,CEBPZ,DLX2,PRDM2,TBPL1,ELL2,ELF1,EGR1,EGR2,BHLHE41,EREG,IRF1,FOSB,PLAGL2,ZNF317,ZNF10,PBX4,DHX29,MED17,SAFB2,ZNF764,JUND,ZCCHC9,RARA,THAP1,RRP8,PER2,IGHMBP2,MED10,EIF2S1,ELP3,MBD2,BHLHE40,TBX3,BACH2,AKIRIN2,PREB,ZNF430,C…
GO:0006139	nucleobase-containing compound metabolic process	565	4551	0.14	9.33e-14	9606.ENSP00000157600,9606.ENSP00000164227,9606.ENSP00000166139,9606.ENSP00000170564,9606.ENSP00000171111,9606.ENSP00000196489,9606.ENSP00000198767,9606.ENSP00000199320,9606.ENSP00000209728,9606.ENSP00000210444,9606.ENSP00000211936,9606.ENSP00000212015,9606.ENSP00000216037,9606.ENSP00000216038,9606.ENSP00000216252,9606.ENSP00000216294,9606.ENSP00000216489,9606.ENSP00000217109,9606.ENSP00000220429,…	LMCD1,BCL3,FSTL3,GPATCH1,KEAP1,ZNF416,RRN3,DIMT1,CDC6,NANS,ZNF184,SIRT1,XBP1,RTCB,PHF5A,SNAPC1,ALKBH1,CSTF1,GABPB1,BRF2,GSR,RELB,ERF,NAMPT,SETX,NFKB1,ZPR1,PDHX,PRDM4,CSRNP2,ZBTB24,BYSL,HARS2,RARS,UMPS,PCGF1,CEBPZ,DLX2,MSH6,PRDM2,TBPL1,ELL2,DDX55,ELF1,EGR1,EGR2,BHLHE41,MPHOSPH10,EREG,IRF1,FOSB,PLAGL2,ZNF317,ZNF10,CDADC1,PBX4,DHX29,MED17,SAFB2,ZNF764,JUND,SESN2,GRWD1,ZCCHC9,RARA,THAP1,RRP8,PER2,IGH…
GO:0048518	positive regulation of biological process	654	5459	0.12	1.24e-13	9606.ENSP00000013125,9606.ENSP00000056217,9606.ENSP00000157600,9606.ENSP00000157812,9606.ENSP00000158771,9606.ENSP00000164227,9606.ENSP00000166139,9606.ENSP00000171111,9606.ENSP00000179259,9606.ENSP00000198767,9606.ENSP00000199320,9606.ENSP00000200453,9606.ENSP00000202556,9606.ENSP00000209728,9606.ENSP00000212015,9606.ENSP00000215631,9606.ENSP00000215904,9606.ENSP00000216037,9606.ENSP00000216085,…	MAP4K5,ARHGEF5,LMCD1,PSMC4,DERL2,BCL3,FSTL3,KEAP1,C12orf5,RRN3,DIMT1,PPP1R15A,PPP1R13B,CDC6,SIRT1,GADD45B,PDXP,XBP1,RHBDD3,HMOX1,PHF5A,SOS2,NFKBIA,CHMP4B,EHD4,GABPB1,RIPK2,MTMR9,RELB,NAMPT,STX1A,SERPINE1,SETX,PPIF,NFKB1,ZPR1,PRDM4,CSRNP2,CYP27B1,CDKN1B,CLEC4A,GCLC,GUCA1B,HBEGF,TUSC2,ODC1,CEBPZ,DLX2,MSH6,PRDM2,RGS2,TBPL1,ATAD2B,DUSP1,ELF1,EGR1,KALRN,EGR2,SNAI1,EREG,IRF1,INSIG2,TNFSF9,FOSB,PLAGL2,T…
GO:0046483	heterocycle metabolic process	580	4716	0.14	1.63e-13	9606.ENSP00000157600,9606.ENSP00000164227,9606.ENSP00000166139,9606.ENSP00000170564,9606.ENSP00000171111,9606.ENSP00000196489,9606.ENSP00000198767,9606.ENSP00000199320,9606.ENSP00000209728,9606.ENSP00000210444,9606.ENSP00000211936,9606.ENSP00000212015,9606.ENSP00000215904,9606.ENSP00000216037,9606.ENSP00000216038,9606.ENSP00000216117,9606.ENSP00000216252,9606.ENSP00000216294,9606.ENSP00000216489,…	LMCD1,BCL3,FSTL3,GPATCH1,KEAP1,ZNF416,RRN3,DIMT1,CDC6,NANS,ZNF184,SIRT1,PDXP,XBP1,RTCB,HMOX1,PHF5A,SNAPC1,ALKBH1,CSTF1,GABPB1,BRF2,GSR,RELB,ERF,NAMPT,SETX,NFKB1,ZPR1,PDHX,PRDM4,CSRNP2,ZBTB24,BYSL,HARS2,RARS,UMPS,PCGF1,CEBPZ,DLX2,MSH6,PRDM2,SLC19A2,TBPL1,ABCG2,ELL2,DDX55,ELF1,EGR1,EGR2,BHLHE41,MPHOSPH10,EREG,IRF1,FOSB,PLAGL2,ZNF317,ZNF10,CDADC1,PBX4,DHX29,MED17,SAFB2,ZNF764,JUND,SESN2,GRWD1,ZCCHC9…
GO:0044267	cellular protein metabolic process	467	3603	0.16	1.72e-13	9606.ENSP00000013125,9606.ENSP00000053468,9606.ENSP00000157600,9606.ENSP00000157812,9606.ENSP00000158771,9606.ENSP00000166139,9606.ENSP00000171111,9606.ENSP00000185150,9606.ENSP00000200453,9606.ENSP00000209884,9606.ENSP00000212015,9606.ENSP00000215904,9606.ENSP00000216037,9606.ENSP00000216039,9606.ENSP00000216085,9606.ENSP00000216267,9606.ENSP00000216797,9606.ENSP00000217402,9606.ENSP00000219313,…	MAP4K5,MRPS10,LMCD1,PSMC4,DERL2,FSTL3,KEAP1,ERLEC1,PPP1R15A,KLHL20,SIRT1,PDXP,XBP1,JOSD1,RHBDD3,BRD1,NFKBIA,CHMP4B,PSMD7,RIPK2,FKBP14,SETX,PPIF,NFKB1,PRDM4,CDKN1B,FGFR1OP2,HARS2,HBEGF,RARS,KLHL18,PCGF1,PRDM2,FBXO30,RNF103,DUSP1,ALG5,KALRN,EGR2,RNF11,EREG,WNK4,FBXL12,SDF2L1,LIF,DNAJB9,EGLN3,DHX29,RAF1,TRPC4AP,RARA,PRKAB2,ILKAP,PER2,H3F3B,KDM6B,IGHMBP2,USPL1,MED10,BTG1,RNF122,EIF2S1,ELP3,IRAK2,BACH…
GO:0006725	cellular aromatic compound metabolic process	582	4754	0.13	3.19e-13	9606.ENSP00000157600,9606.ENSP00000164227,9606.ENSP00000166139,9606.ENSP00000170564,9606.ENSP00000171111,9606.ENSP00000196489,9606.ENSP00000198767,9606.ENSP00000199320,9606.ENSP00000209728,9606.ENSP00000210444,9606.ENSP00000211936,9606.ENSP00000212015,9606.ENSP00000215904,9606.ENSP00000216037,9606.ENSP00000216038,9606.ENSP00000216117,9606.ENSP00000216252,9606.ENSP00000216294,9606.ENSP00000216489,…	LMCD1,BCL3,FSTL3,GPATCH1,KEAP1,ZNF416,RRN3,DIMT1,CDC6,NANS,ZNF184,SIRT1,PDXP,XBP1,RTCB,HMOX1,PHF5A,SNAPC1,ALKBH1,CSTF1,GABPB1,BRF2,GSR,RELB,ERF,NAMPT,SETX,NFKB1,ZPR1,PDHX,PRDM4,CSRNP2,ZBTB24,BYSL,HARS2,RARS,UMPS,PCGF1,CEBPZ,DLX2,MSH6,PRDM2,SLC19A2,TBPL1,ABCG2,ELL2,DDX55,ELF1,EGR1,EGR2,BHLHE41,MPHOSPH10,EREG,IRF1,FOSB,PLAGL2,ZNF317,ZNF10,CDADC1,PBX4,DHX29,MED17,SAFB2,ZNF764,JUND,SESN2,GRWD1,AOC2,Z…
GO:0050794	regulation of cellular process	1114	10484	0.07	5.04e-13	9606.ENSP00000013125,9606.ENSP00000014914,9606.ENSP00000033079,9606.ENSP00000056217,9606.ENSP00000064780,9606.ENSP00000157600,9606.ENSP00000157812,9606.ENSP00000158771,9606.ENSP00000164024,9606.ENSP00000164227,9606.ENSP00000166139,9606.ENSP00000171111,9606.ENSP00000179259,9606.ENSP00000185150,9606.ENSP00000196489,9606.ENSP00000198767,9606.ENSP00000199320,9606.ENSP00000200453,9606.ENSP00000202556,…	MAP4K5,GPRC5A,FAM13B,ARHGEF5,RELT,LMCD1,PSMC4,DERL2,CELSR3,BCL3,FSTL3,KEAP1,C12orf5,ERLEC1,ZNF416,RRN3,DIMT1,PPP1R15A,PPP1R13B,CDC6,KLHL20,ZNF184,SIRT1,GADD45B,PDXP,XBP1,RHBDD3,HMOX1,PHF5A,SNAPC1,SOS2,CGRRF1,ALKBH1,NFKBIA,CHMP4B,GLA,EHD4,GABPB1,RHOV,VPS18,BRF2,RIPK2,MTMR9,GSR,RELB,ERF,NAMPT,FKBP14,STX1A,SERPINE1,SETX,PPIF,RASD1,AKAP10,NFKB1,ZPR1,IL10RA,PRDM4,CSRNP2,CYP27B1,CDKN1B,CLEC4A,GCLC,ZBTB…
GO:0009987	cellular process	1462	14652	0.04	5.75e-13	9606.ENSP00000009041,9606.ENSP00000013125,9606.ENSP00000014914,9606.ENSP00000033079,9606.ENSP00000053468,9606.ENSP00000056217,9606.ENSP00000064780,9606.ENSP00000075120,9606.ENSP00000157600,9606.ENSP00000157812,9606.ENSP00000158771,9606.ENSP00000163416,9606.ENSP00000164024,9606.ENSP00000164227,9606.ENSP00000166139,9606.ENSP00000170564,9606.ENSP00000171111,9606.ENSP00000179259,9606.ENSP00000185150,…	STARD3NL,MAP4K5,GPRC5A,FAM13B,MRPS10,ARHGEF5,RELT,SLC2A3,LMCD1,PSMC4,DERL2,GOLGA5,CELSR3,BCL3,FSTL3,GPATCH1,KEAP1,C12orf5,ERLEC1,OSTM1,ZNF416,RRN3,DIMT1,PPP1R15A,PDRG1,PPP1R13B,CDC6,KLHL20,NANS,ZNF184,SIRT1,GADD45B,PDXP,XBP1,RTCB,JOSD1,RHBDD3,HMOX1,PHF5A,BRD1,SNAPC1,SOS2,CGRRF1,ALKBH1,NFKBIA,CSTF1,CHMP4B,KCND1,GLA,PSMD7,EHD4,GABPB1,RHOV,VPS18,BRF2,RIPK2,MTMR9,GSR,DHDH,RELB,ERF,BET1,NAMPT,FKBP14,S…
GO:1901360	organic cyclic compound metabolic process	601	4963	0.13	5.89e-13	9606.ENSP00000009041,9606.ENSP00000157600,9606.ENSP00000164227,9606.ENSP00000166139,9606.ENSP00000170564,9606.ENSP00000171111,9606.ENSP00000196489,9606.ENSP00000198767,9606.ENSP00000199320,9606.ENSP00000209728,9606.ENSP00000210444,9606.ENSP00000211936,9606.ENSP00000212015,9606.ENSP00000215904,9606.ENSP00000216037,9606.ENSP00000216038,9606.ENSP00000216117,9606.ENSP00000216252,9606.ENSP00000216294,…	STARD3NL,LMCD1,BCL3,FSTL3,GPATCH1,KEAP1,ZNF416,RRN3,DIMT1,CDC6,NANS,ZNF184,SIRT1,PDXP,XBP1,RTCB,HMOX1,PHF5A,SNAPC1,ALKBH1,CSTF1,GABPB1,BRF2,GSR,RELB,ERF,NAMPT,CYP3A5,SETX,NFKB1,ZPR1,PDHX,PRDM4,CSRNP2,CYP27B1,ZBTB24,BYSL,HARS2,RARS,UMPS,PCGF1,CEBPZ,DLX2,MSH6,PRDM2,SLC19A2,TBPL1,ABCG2,ELL2,DDX55,ELF1,EGR1,EGR2,BHLHE41,MPHOSPH10,EREG,IRF1,INSIG2,FOSB,PLAGL2,ZNF317,ZNF10,CDADC1,PBX4,DHX29,MED17,SAFB2…
GO:1901576	organic substance biosynthetic process	569	4656	0.13	1.06e-12	9606.ENSP00000009041,9606.ENSP00000053468,9606.ENSP00000157600,9606.ENSP00000164227,9606.ENSP00000166139,9606.ENSP00000171111,9606.ENSP00000196489,9606.ENSP00000198767,9606.ENSP00000209728,9606.ENSP00000210444,9606.ENSP00000211936,9606.ENSP00000212015,9606.ENSP00000216037,9606.ENSP00000216252,9606.ENSP00000216294,9606.ENSP00000217109,9606.ENSP00000220429,9606.ENSP00000220659,9606.ENSP00000221086,…	STARD3NL,MRPS10,LMCD1,BCL3,FSTL3,KEAP1,ZNF416,RRN3,CDC6,NANS,ZNF184,SIRT1,XBP1,PHF5A,SNAPC1,CSTF1,GABPB1,BRF2,MTMR9,RELB,ERF,NAMPT,SETX,NFKB1,ZPR1,PDHX,PRDM4,CSRNP2,CYP27B1,GCLC,ZBTB24,HARS2,RARS,UMPS,PCGF1,ODC1,CEBPZ,DLX2,PRDM2,TBPL1,ELL2,ELF1,ALG5,EGR1,EGR2,BHLHE41,EREG,IRF1,INSIG2,FOSB,PLAGL2,ZNF317,ZNF10,SDF2L1,PBX4,DHX29,MED17,SAFB2,ZNF764,JUND,GRWD1,ZCCHC9,RARA,PRKAB2,THAP1,RRP8,PER2,IGHMBP…
GO:0034641	cellular nitrogen compound metabolic process	614	5126	0.12	1.82e-12	9606.ENSP00000053468,9606.ENSP00000157600,9606.ENSP00000164227,9606.ENSP00000166139,9606.ENSP00000170564,9606.ENSP00000171111,9606.ENSP00000196489,9606.ENSP00000198767,9606.ENSP00000199320,9606.ENSP00000209728,9606.ENSP00000210444,9606.ENSP00000211936,9606.ENSP00000212015,9606.ENSP00000215904,9606.ENSP00000216037,9606.ENSP00000216038,9606.ENSP00000216117,9606.ENSP00000216252,9606.ENSP00000216294,…	MRPS10,LMCD1,BCL3,FSTL3,GPATCH1,KEAP1,ZNF416,RRN3,DIMT1,CDC6,NANS,ZNF184,SIRT1,PDXP,XBP1,RTCB,HMOX1,PHF5A,SNAPC1,ALKBH1,CSTF1,GLA,GABPB1,BRF2,GSR,RELB,ERF,NAMPT,CYP3A5,SETX,NFKB1,ZPR1,PDHX,PRDM4,CSRNP2,GCLC,ZBTB24,BYSL,HARS2,RARS,UMPS,PCGF1,ODC1,CEBPZ,DLX2,MSH6,PRDM2,SLC19A2,TBPL1,ABCG2,ELL2,DDX55,ELF1,EGR1,EGR2,BHLHE41,ORMDL2,MPHOSPH10,EREG,IRF1,FOSB,PLAGL2,ZNF317,ZNF10,CDADC1,PBX4,DHX29,MED17,S…
GO:0031328	positive regulation of cellular biosynthetic process	273	1846	0.22	1.83e-12	9606.ENSP00000157812,9606.ENSP00000164227,9606.ENSP00000166139,9606.ENSP00000198767,9606.ENSP00000200453,9606.ENSP00000212015,9606.ENSP00000216037,9606.ENSP00000216117,9606.ENSP00000216252,9606.ENSP00000216797,9606.ENSP00000220429,9606.ENSP00000220751,9606.ENSP00000221452,9606.ENSP00000222553,9606.ENSP00000223095,9606.ENSP00000224140,9606.ENSP00000226574,9606.ENSP00000227322,9606.ENSP00000228437,…	PSMC4,BCL3,FSTL3,RRN3,PPP1R15A,SIRT1,XBP1,HMOX1,PHF5A,NFKBIA,GABPB1,RIPK2,RELB,NAMPT,SERPINE1,SETX,NFKB1,ZPR1,PRDM4,CSRNP2,GUCA1B,CEBPZ,DLX2,PRDM2,TBPL1,ATAD2B,ELF1,EGR1,EGR2,SNAI1,EREG,IRF1,INSIG2,FOSB,PLAGL2,TICAM1,LIF,PBX4,RAF1,MED17,JUND,SESN2,RARA,PER2,KDM6B,JAG1,MED10,TBX3,AKIRIN2,RIPK1,THBS1,LHX5,NLRC5,ELL,C19orf10,EPC1,IL1A,BRD4,MED26,ARID3A,ACVR1,SLC9A1,CCNT2,ARID4B,IL11,FOSL2,ICAM1,LEF1…
GO:0010557	positive regulation of macromolecule biosynthetic process	263	1758	0.22	1.85e-12	9606.ENSP00000157812,9606.ENSP00000164227,9606.ENSP00000166139,9606.ENSP00000198767,9606.ENSP00000200453,9606.ENSP00000212015,9606.ENSP00000216037,9606.ENSP00000216117,9606.ENSP00000216252,9606.ENSP00000216797,9606.ENSP00000220429,9606.ENSP00000220751,9606.ENSP00000221452,9606.ENSP00000222553,9606.ENSP00000223095,9606.ENSP00000224140,9606.ENSP00000226574,9606.ENSP00000227322,9606.ENSP00000228437,…	PSMC4,BCL3,FSTL3,RRN3,PPP1R15A,SIRT1,XBP1,HMOX1,PHF5A,NFKBIA,GABPB1,RIPK2,RELB,NAMPT,SERPINE1,SETX,NFKB1,ZPR1,PRDM4,CSRNP2,CEBPZ,DLX2,PRDM2,TBPL1,ATAD2B,ELF1,EGR1,EGR2,SNAI1,EREG,IRF1,INSIG2,FOSB,PLAGL2,TICAM1,LIF,PBX4,RAF1,MED17,JUND,SESN2,RARA,PER2,KDM6B,JAG1,MED10,TBX3,AKIRIN2,RIPK1,THBS1,LHX5,NLRC5,ELL,C19orf10,EPC1,IL1A,BRD4,MED26,ARID3A,ACVR1,SLC9A1,CCNT2,ARID4B,IL11,FOSL2,LEF1,SRF,CREM,GAL…
GO:0048522	positive regulation of cellular process	591	4898	0.13	2.14e-12	9606.ENSP00000013125,9606.ENSP00000056217,9606.ENSP00000157600,9606.ENSP00000157812,9606.ENSP00000158771,9606.ENSP00000164227,9606.ENSP00000166139,9606.ENSP00000171111,9606.ENSP00000179259,9606.ENSP00000198767,9606.ENSP00000199320,9606.ENSP00000200453,9606.ENSP00000202556,9606.ENSP00000209728,9606.ENSP00000212015,9606.ENSP00000215631,9606.ENSP00000215904,9606.ENSP00000216037,9606.ENSP00000216117,…	MAP4K5,ARHGEF5,LMCD1,PSMC4,DERL2,BCL3,FSTL3,KEAP1,C12orf5,RRN3,DIMT1,PPP1R15A,PPP1R13B,CDC6,SIRT1,GADD45B,PDXP,XBP1,HMOX1,PHF5A,SOS2,NFKBIA,EHD4,GABPB1,RIPK2,MTMR9,RELB,NAMPT,STX1A,SERPINE1,SETX,PPIF,NFKB1,ZPR1,PRDM4,CSRNP2,CYP27B1,CDKN1B,GCLC,GUCA1B,HBEGF,ODC1,CEBPZ,DLX2,MSH6,PRDM2,RGS2,TBPL1,ATAD2B,DUSP1,ELF1,EGR1,KALRN,EGR2,SNAI1,EREG,IRF1,INSIG2,TNFSF9,FOSB,PLAGL2,TICAM1,LIF,DLL4,EGLN3,PBX4,R…
GO:0044249	cellular biosynthetic process	558	4567	0.13	2.24e-12	9606.ENSP00000009041,9606.ENSP00000053468,9606.ENSP00000157600,9606.ENSP00000164227,9606.ENSP00000166139,9606.ENSP00000171111,9606.ENSP00000196489,9606.ENSP00000198767,9606.ENSP00000209728,9606.ENSP00000210444,9606.ENSP00000211936,9606.ENSP00000212015,9606.ENSP00000216037,9606.ENSP00000216252,9606.ENSP00000216294,9606.ENSP00000217109,9606.ENSP00000220429,9606.ENSP00000220659,9606.ENSP00000221086,…	STARD3NL,MRPS10,LMCD1,BCL3,FSTL3,KEAP1,ZNF416,RRN3,CDC6,NANS,ZNF184,SIRT1,XBP1,PHF5A,SNAPC1,CSTF1,GABPB1,BRF2,MTMR9,RELB,ERF,NAMPT,SETX,NFKB1,ZPR1,PDHX,PRDM4,CSRNP2,CYP27B1,GCLC,ZBTB24,HARS2,RARS,UMPS,PCGF1,ODC1,CEBPZ,DLX2,PRDM2,TBPL1,ELL2,ELF1,ALG5,EGR1,EGR2,BHLHE41,EREG,IRF1,FOSB,PLAGL2,ZNF317,ZNF10,SDF2L1,PBX4,DHX29,MED17,SAFB2,ZNF764,JUND,GRWD1,ZCCHC9,RARA,PRKAB2,THAP1,RRP8,PER2,IGHMBP2,MED10…
GO:0033554	cellular response to stress	239	1553	0.23	2.37e-12	9606.ENSP00000013125,9606.ENSP00000157812,9606.ENSP00000158771,9606.ENSP00000164227,9606.ENSP00000179259,9606.ENSP00000185150,9606.ENSP00000200453,9606.ENSP00000212015,9606.ENSP00000216037,9606.ENSP00000216117,9606.ENSP00000216489,9606.ENSP00000216797,9606.ENSP00000220659,9606.ENSP00000220751,9606.ENSP00000221130,9606.ENSP00000221452,9606.ENSP00000222803,9606.ENSP00000224140,9606.ENSP00000225174,…	MAP4K5,PSMC4,DERL2,BCL3,C12orf5,ERLEC1,PPP1R15A,SIRT1,XBP1,HMOX1,ALKBH1,NFKBIA,BRF2,RIPK2,GSR,RELB,FKBP14,SETX,PPIF,NFKB1,CDKN1B,MSH6,RNF103,EGR1,INSIG2,PITHD1,SDF2L1,DNAJB9,EGLN3,SESN2,DNAJB1,RRP8,KDM6B,IGHMBP2,EIF2S1,IRAK2,TBX3,HUS1,KIAA0368,RIPK1,THBS1,BCL2L10,PREB,FAF2,SPAG9,PIK3C3,WIPI1,ADNP2,PRDX1,C19orf10,MAP3K8,UFD1L,IL1A,BRD4,ARID3A,MAP4K3,SLC9A1,MUL1,ICAM1,MAP3K13,SRF,PMS2,MAPKAP1,GTF2H…
GO:0009058	biosynthetic process	572	4714	0.13	2.75e-12	9606.ENSP00000009041,9606.ENSP00000053468,9606.ENSP00000157600,9606.ENSP00000164227,9606.ENSP00000166139,9606.ENSP00000171111,9606.ENSP00000196489,9606.ENSP00000198767,9606.ENSP00000209728,9606.ENSP00000210444,9606.ENSP00000211936,9606.ENSP00000212015,9606.ENSP00000216037,9606.ENSP00000216252,9606.ENSP00000216294,9606.ENSP00000217109,9606.ENSP00000220429,9606.ENSP00000220659,9606.ENSP00000221086,…	STARD3NL,MRPS10,LMCD1,BCL3,FSTL3,KEAP1,ZNF416,RRN3,CDC6,NANS,ZNF184,SIRT1,XBP1,PHF5A,SNAPC1,CSTF1,GABPB1,BRF2,MTMR9,RELB,ERF,NAMPT,SETX,NFKB1,ZPR1,PDHX,PRDM4,CSRNP2,CYP27B1,GCLC,ZBTB24,HARS2,RARS,UMPS,PCGF1,ODC1,CEBPZ,DLX2,PRDM2,TBPL1,ELL2,ELF1,ALG5,EGR1,EGR2,BHLHE41,EREG,IRF1,INSIG2,FOSB,PLAGL2,ZNF317,ZNF10,SDF2L1,PBX4,DHX29,MED17,SAFB2,ZNF764,JUND,GRWD1,ZCCHC9,RARA,PRKAB2,THAP1,RRP8,PER2,IGHMBP…
GO:0009891	positive regulation of biosynthetic process	275	1876	0.21	3.35e-12	9606.ENSP00000157812,9606.ENSP00000164227,9606.ENSP00000166139,9606.ENSP00000198767,9606.ENSP00000200453,9606.ENSP00000212015,9606.ENSP00000216037,9606.ENSP00000216117,9606.ENSP00000216252,9606.ENSP00000216797,9606.ENSP00000220429,9606.ENSP00000220751,9606.ENSP00000221452,9606.ENSP00000222553,9606.ENSP00000223095,9606.ENSP00000224140,9606.ENSP00000226574,9606.ENSP00000227322,9606.ENSP00000228437,…	PSMC4,BCL3,FSTL3,RRN3,PPP1R15A,SIRT1,XBP1,HMOX1,PHF5A,NFKBIA,GABPB1,RIPK2,RELB,NAMPT,SERPINE1,SETX,NFKB1,ZPR1,PRDM4,CSRNP2,GUCA1B,CEBPZ,DLX2,PRDM2,TBPL1,ATAD2B,ELF1,EGR1,EGR2,SNAI1,EREG,IRF1,INSIG2,FOSB,PLAGL2,TICAM1,LIF,PBX4,RAF1,MED17,JUND,SESN2,RARA,PER2,KDM6B,JAG1,MED10,TBX3,AKIRIN2,RIPK1,THBS1,LHX5,NLRC5,ELL,C19orf10,EPC1,IL1A,BRD4,MED26,ARID3A,ACVR1,SLC9A1,CCNT2,ARID4B,IL11,FOSL2,ICAM1,LEF1…
GO:0045944	positive regulation of transcription by RNA polymerase II	184	1104	0.27	7.21e-12	9606.ENSP00000157812,9606.ENSP00000164227,9606.ENSP00000166139,9606.ENSP00000212015,9606.ENSP00000216037,9606.ENSP00000216797,9606.ENSP00000220429,9606.ENSP00000220751,9606.ENSP00000221452,9606.ENSP00000222553,9606.ENSP00000223095,9606.ENSP00000224140,9606.ENSP00000226574,9606.ENSP00000228437,9606.ENSP00000228515,9606.ENSP00000234170,9606.ENSP00000234198,9606.ENSP00000235372,9606.ENSP00000237264,…	PSMC4,BCL3,FSTL3,SIRT1,XBP1,NFKBIA,GABPB1,RIPK2,RELB,NAMPT,SERPINE1,SETX,NFKB1,PRDM4,CSRNP2,CEBPZ,DLX2,PRDM2,TBPL1,ATAD2B,ELF1,EGR1,EGR2,IRF1,INSIG2,FOSB,PLAGL2,LIF,RAF1,MED17,JUND,SESN2,RARA,KDM6B,JAG1,MED10,AKIRIN2,RIPK1,NLRC5,ELL,C19orf10,EPC1,IL1A,BRD4,ARID3A,ACVR1,SLC9A1,CCNT2,ARID4B,IL11,FOSL2,LEF1,SRF,CREM,GAL,GTF2H1,TEF,ARNTL2,CRTC3,TAF4B,MEF2D,CSRNP1,EAF2,CDKN2B,ZNF462,PPRC1,NIPBL,FLCN,P…
GO:0006366	transcription by RNA polymerase II	143	784	0.31	1.64e-11	9606.ENSP00000212015,9606.ENSP00000216037,9606.ENSP00000216294,9606.ENSP00000217109,9606.ENSP00000224140,9606.ENSP00000226574,9606.ENSP00000228437,9606.ENSP00000228515,9606.ENSP00000234170,9606.ENSP00000234198,9606.ENSP00000235372,9606.ENSP00000237264,9606.ENSP00000237853,9606.ENSP00000239882,9606.ENSP00000239938,9606.ENSP00000242480,9606.ENSP00000245414,9606.ENSP00000245919,9606.ENSP00000246229,…	SIRT1,XBP1,SNAPC1,CSTF1,SETX,NFKB1,PRDM4,CSRNP2,CEBPZ,DLX2,PRDM2,TBPL1,ELL2,ELF1,EGR1,EGR2,IRF1,FOSB,PLAGL2,PBX4,MED17,JUND,RARA,MED10,ELP3,BACH2,ELL,MED15,MED26,ARID3A,CCNT2,FOSL2,LEF1,SRF,GTF2H1,GMEB2,TEF,TRIP11,TAF4B,MEF2D,SNRPG,POLR2D,CSRNP1,EAF2,NRBF2,CCRN4L,GTF2E1,PPARG,MED8,MED27,ZSCAN21,STAT5B,REL,MITF,ICE1,NFIL3,PCF11,RUNX1,JUNB,CEBPB,FOS,PPM1D,ETV5,NR1D2,FOSL1,INTS6,ELF4,TFE3,SUPT6H,SMA…
GO:0050789	regulation of biological process	1157	11116	0.06	3.11e-11	9606.ENSP00000013125,9606.ENSP00000014914,9606.ENSP00000033079,9606.ENSP00000056217,9606.ENSP00000064780,9606.ENSP00000157600,9606.ENSP00000157812,9606.ENSP00000158771,9606.ENSP00000164024,9606.ENSP00000164227,9606.ENSP00000166139,9606.ENSP00000171111,9606.ENSP00000179259,9606.ENSP00000185150,9606.ENSP00000196489,9606.ENSP00000198767,9606.ENSP00000199320,9606.ENSP00000200453,9606.ENSP00000202556,…	MAP4K5,GPRC5A,FAM13B,ARHGEF5,RELT,LMCD1,PSMC4,DERL2,CELSR3,BCL3,FSTL3,KEAP1,C12orf5,ERLEC1,ZNF416,RRN3,DIMT1,PPP1R15A,PPP1R13B,CDC6,KLHL20,ZNF184,SIRT1,GADD45B,PDXP,XBP1,RHBDD3,HMOX1,PHF5A,SNAPC1,SOS2,CGRRF1,ALKBH1,NFKBIA,CHMP4B,KCND1,GLA,EHD4,GABPB1,RHOV,VPS18,BRF2,RIPK2,MTMR9,GSR,RELB,ERF,NAMPT,FKBP14,STX1A,SERPINE1,SETX,PPIF,RASD1,AKAP10,NFKB1,ZPR1,IL10RA,PRDM4,CSRNP2,CYP27B1,CDKN1B,CLEC4A,GCL…
GO:0065007	biological regulation	1210	11740	0.06	4.16e-11	9606.ENSP00000009041,9606.ENSP00000013125,9606.ENSP00000014914,9606.ENSP00000033079,9606.ENSP00000056217,9606.ENSP00000064780,9606.ENSP00000157600,9606.ENSP00000157812,9606.ENSP00000158771,9606.ENSP00000164024,9606.ENSP00000164227,9606.ENSP00000166139,9606.ENSP00000171111,9606.ENSP00000179259,9606.ENSP00000185150,9606.ENSP00000196489,9606.ENSP00000198767,9606.ENSP00000199320,9606.ENSP00000200453,…	STARD3NL,MAP4K5,GPRC5A,FAM13B,ARHGEF5,RELT,LMCD1,PSMC4,DERL2,CELSR3,BCL3,FSTL3,KEAP1,C12orf5,ERLEC1,ZNF416,RRN3,DIMT1,PPP1R15A,PPP1R13B,CDC6,KLHL20,ZNF184,SIRT1,GADD45B,PDXP,XBP1,RHBDD3,HMOX1,PHF5A,SNAPC1,SOS2,CGRRF1,ALKBH1,NFKBIA,CHMP4B,KCND1,GLA,EHD4,GABPB1,RHOV,VPS18,BRF2,RIPK2,MTMR9,GSR,RELB,ERF,NAMPT,FKBP14,STX1A,SERPINE1,SETX,PPIF,RASD1,AKAP10,NFKB1,ZPR1,IL10RA,PRDM4,CSRNP2,CYP27B1,CDKN1B,C…
GO:0048519	negative regulation of biological process	582	4953	0.12	3.51e-10	9606.ENSP00000014914,9606.ENSP00000157600,9606.ENSP00000158771,9606.ENSP00000164227,9606.ENSP00000166139,9606.ENSP00000171111,9606.ENSP00000179259,9606.ENSP00000185150,9606.ENSP00000198767,9606.ENSP00000200453,9606.ENSP00000202556,9606.ENSP00000209728,9606.ENSP00000209884,9606.ENSP00000212015,9606.ENSP00000215631,9606.ENSP00000216037,9606.ENSP00000216085,9606.ENSP00000216117,9606.ENSP00000216420,…	GPRC5A,LMCD1,DERL2,BCL3,FSTL3,KEAP1,C12orf5,ERLEC1,RRN3,PPP1R15A,PPP1R13B,CDC6,KLHL20,SIRT1,GADD45B,XBP1,RHBDD3,HMOX1,CGRRF1,ALKBH1,NFKBIA,CHMP4B,GLA,RIPK2,MTMR9,RELB,ERF,SERPINE1,SETX,PPIF,RASD1,NFKB1,ZPR1,CSRNP2,CYP27B1,CDKN1B,CLEC4A,GCLC,HBEGF,BNIP1,TUSC2,DLX2,MSH6,RGS2,ATAD2B,DUSP1,ELF1,EGR1,KALRN,BHLHE41,ORMDL2,SNAI1,MPHOSPH10,EREG,IRF1,INSIG2,FOSB,WNK4,TICAM1,LIF,DNAJB9,DLL4,FXR2,RAF1,MICB,…
GO:0051246	regulation of protein metabolic process	348	2668	0.16	1.03e-09	9606.ENSP00000013125,9606.ENSP00000014914,9606.ENSP00000056217,9606.ENSP00000157812,9606.ENSP00000158771,9606.ENSP00000164024,9606.ENSP00000164227,9606.ENSP00000171111,9606.ENSP00000185150,9606.ENSP00000200453,9606.ENSP00000209728,9606.ENSP00000212015,9606.ENSP00000215631,9606.ENSP00000216037,9606.ENSP00000216085,9606.ENSP00000216117,9606.ENSP00000216489,9606.ENSP00000216797,9606.ENSP00000220325,…	MAP4K5,GPRC5A,ARHGEF5,PSMC4,DERL2,CELSR3,BCL3,KEAP1,ERLEC1,PPP1R15A,CDC6,SIRT1,GADD45B,XBP1,RHBDD3,HMOX1,ALKBH1,NFKBIA,EHD4,RIPK2,SERPINE1,NFKB1,CDKN1B,GCLC,HBEGF,ODC1,RGS2,DUSP1,EGR1,EREG,IRF1,TICAM1,LIF,FXR2,EGLN3,RAF1,GDF15,CEP85,SESN2,RARA,PER2,EIF2S1,ELP3,IRAK2,AKIRIN2,HUS1,RIPK1,SDCBP,DCUN1D5,THBS1,BCL2L10,CCND2,LIPG,SEMA7A,SPAG9,N4BP1,PRDX1,C19orf10,MAP3K8,IL1A,BRD4,BIRC3,ACVR1,MAP4K3,CCNT…
GO:0019538	protein metabolic process	502	4194	0.12	2e-09	9606.ENSP00000013125,9606.ENSP00000053468,9606.ENSP00000157600,9606.ENSP00000157812,9606.ENSP00000158771,9606.ENSP00000161006,9606.ENSP00000166139,9606.ENSP00000171111,9606.ENSP00000185150,9606.ENSP00000200453,9606.ENSP00000209884,9606.ENSP00000212015,9606.ENSP00000215904,9606.ENSP00000216037,9606.ENSP00000216039,9606.ENSP00000216085,9606.ENSP00000216267,9606.ENSP00000216797,9606.ENSP00000217402,…	MAP4K5,MRPS10,LMCD1,PSMC4,DERL2,PRSS22,FSTL3,KEAP1,ERLEC1,PPP1R15A,KLHL20,SIRT1,PDXP,XBP1,JOSD1,RHBDD3,BRD1,NFKBIA,CHMP4B,PSMD7,RIPK2,FKBP14,SETX,PPIF,NFKB1,PRDM4,CDKN1B,FGFR1OP2,HARS2,HBEGF,RARS,KLHL18,PCGF1,PRDM2,FBXO30,RNF103,DUSP1,ALG5,KALRN,EGR2,RNF11,EREG,WNK4,FBXL12,SDF2L1,LIF,DNAJB9,EGLN3,DHX29,RAF1,TRPC4AP,NUMBL,RARA,PRKAB2,ILKAP,PER2,H3F3B,KDM6B,IGHMBP2,USPL1,MED10,BTG1,RNF122,EIF2S1,EL…
GO:0032268	regulation of cellular protein metabolic process	327	2486	0.16	2.09e-09	9606.ENSP00000013125,9606.ENSP00000014914,9606.ENSP00000056217,9606.ENSP00000157812,9606.ENSP00000158771,9606.ENSP00000164024,9606.ENSP00000164227,9606.ENSP00000171111,9606.ENSP00000185150,9606.ENSP00000200453,9606.ENSP00000209728,9606.ENSP00000212015,9606.ENSP00000215631,9606.ENSP00000216037,9606.ENSP00000216489,9606.ENSP00000216797,9606.ENSP00000220325,9606.ENSP00000220751,9606.ENSP00000223095,…	MAP4K5,GPRC5A,ARHGEF5,PSMC4,DERL2,CELSR3,BCL3,KEAP1,ERLEC1,PPP1R15A,CDC6,SIRT1,GADD45B,XBP1,ALKBH1,NFKBIA,EHD4,RIPK2,SERPINE1,NFKB1,CDKN1B,GCLC,HBEGF,RGS2,DUSP1,EGR1,EREG,TICAM1,LIF,FXR2,EGLN3,RAF1,GDF15,CEP85,SESN2,RARA,PER2,EIF2S1,ELP3,IRAK2,AKIRIN2,HUS1,RIPK1,SDCBP,DCUN1D5,THBS1,BCL2L10,CCND2,SEMA7A,SPAG9,N4BP1,PRDX1,C19orf10,MAP3K8,BRD4,BIRC3,ACVR1,MAP4K3,CCNT2,MUL1,ALS2,RAPGEF2,IL11,DNAJC27,…
GO:0006986	response to unfolded protein	47	153	0.53	4.07e-09	9606.ENSP00000158771,9606.ENSP00000216037,9606.ENSP00000222803,9606.ENSP00000249356,9606.ENSP00000254322,9606.ENSP00000256383,9606.ENSP00000259339,9606.ENSP00000260356,9606.ENSP00000260643,9606.ENSP00000261942,9606.ENSP00000262139,9606.ENSP00000262947,9606.ENSP00000299767,9606.ENSP00000306512,9606.ENSP00000307235,9606.ENSP00000307260,9606.ENSP00000314615,9606.ENSP00000318687,9606.ENSP00000320866,…	DERL2,XBP1,FKBP14,DNAJB9,DNAJB1,EIF2S1,TOR1B,THBS1,PREB,FAF2,WIPI1,C19orf10,HSP90B1,CXCL8,EIF2AK3,TBL2,ARFGAP1,HSPH1,CALR,PDIA5,HSPA5,YOD1,SRPR,CREB3,ATF3,VCP,DNAJB4,PTPN1,BAK1,DAXX,TSPYL2,ZBTB17,SYVN1,OPTN,SEC31A,NFE2L2,VIMP,UBE2J2,CHAC1,DNAJB5,HERPUD1,SRPRB,MANF,FICD,DDIT3,DNAJC3,BHLHA15
GO:0035966	response to topologically incorrect protein	50	172	0.51	4.99e-09	9606.ENSP00000158771,9606.ENSP00000216037,9606.ENSP00000222803,9606.ENSP00000248958,9606.ENSP00000249356,9606.ENSP00000254322,9606.ENSP00000256383,9606.ENSP00000259339,9606.ENSP00000260356,9606.ENSP00000260643,9606.ENSP00000261942,9606.ENSP00000262139,9606.ENSP00000262947,9606.ENSP00000263202,9606.ENSP00000299767,9606.ENSP00000306512,9606.ENSP00000307235,9606.ENSP00000307260,9606.ENSP00000314615,…	DERL2,XBP1,FKBP14,SDF2L1,DNAJB9,DNAJB1,EIF2S1,TOR1B,THBS1,PREB,FAF2,WIPI1,C19orf10,UFD1L,HSP90B1,CXCL8,EIF2AK3,TBL2,ARFGAP1,CLU,HSPH1,CALR,PDIA5,HSPA5,YOD1,SRPR,CREB3,ATF3,VCP,DNAJB4,PTPN1,BAK1,DAXX,TSPYL2,ZBTB17,SYVN1,OPTN,SEC31A,NFE2L2,VIMP,UBE2J2,CHAC1,DNAJB5,HERPUD1,SRPRB,MANF,FICD,DDIT3,DNAJC3,BHLHA15
GO:0048523	negative regulation of cellular process	524	4454	0.12	6.87e-09	9606.ENSP00000014914,9606.ENSP00000157600,9606.ENSP00000158771,9606.ENSP00000164227,9606.ENSP00000166139,9606.ENSP00000179259,9606.ENSP00000185150,9606.ENSP00000198767,9606.ENSP00000200453,9606.ENSP00000202556,9606.ENSP00000209728,9606.ENSP00000209884,9606.ENSP00000212015,9606.ENSP00000215631,9606.ENSP00000216037,9606.ENSP00000216085,9606.ENSP00000216117,9606.ENSP00000216420,9606.ENSP00000216489,…	GPRC5A,LMCD1,DERL2,BCL3,FSTL3,C12orf5,ERLEC1,RRN3,PPP1R15A,PPP1R13B,CDC6,KLHL20,SIRT1,GADD45B,XBP1,RHBDD3,HMOX1,CGRRF1,ALKBH1,NFKBIA,CHMP4B,GLA,RIPK2,MTMR9,RELB,ERF,SERPINE1,SETX,PPIF,RASD1,NFKB1,ZPR1,CSRNP2,CYP27B1,CDKN1B,GCLC,HBEGF,BNIP1,DLX2,MSH6,RGS2,ATAD2B,DUSP1,ELF1,EGR1,KALRN,BHLHE41,ORMDL2,SNAI1,MPHOSPH10,EREG,IRF1,INSIG2,FOSB,TICAM1,LIF,DNAJB9,DLL4,FXR2,RAF1,GDF15,JUND,CEP85,SESN2,ZCCHC9…
GO:0010941	regulation of cell death	232	1638	0.2	8.4e-09	9606.ENSP00000013125,9606.ENSP00000056217,9606.ENSP00000064780,9606.ENSP00000164227,9606.ENSP00000179259,9606.ENSP00000198767,9606.ENSP00000202556,9606.ENSP00000209884,9606.ENSP00000212015,9606.ENSP00000215631,9606.ENSP00000216037,9606.ENSP00000216117,9606.ENSP00000216373,9606.ENSP00000216489,9606.ENSP00000216797,9606.ENSP00000217402,9606.ENSP00000220751,9606.ENSP00000223095,9606.ENSP00000224140,…	MAP4K5,ARHGEF5,RELT,BCL3,C12orf5,RRN3,PPP1R13B,KLHL20,SIRT1,GADD45B,XBP1,HMOX1,SOS2,ALKBH1,NFKBIA,CHMP4B,RIPK2,SERPINE1,SETX,PPIF,NFKB1,ZPR1,CDKN1B,GCLC,BNIP1,DUSP1,EGR1,KALRN,SNAI1,PLAGL2,SDF2L1,EGLN3,RAF1,GDF15,JUND,RARA,BTG1,EIF2S1,TBX3,RIPK1,IER3,THBS1,BCL2L10,CCND2,ADNP2,ACIN1,C19orf10,MAP3K8,IL1A,BIRC3,ACVR1,MAP4K3,SLC9A1,MUL1,RAPGEF2,ICAM1,GOLPH3,LEF1,NRP1,GAL,NPC1,SIK1,RHOB,PLK2,TNFRSF10B…
GO:0031399	regulation of protein modification process	244	1747	0.19	8.41e-09	9606.ENSP00000013125,9606.ENSP00000014914,9606.ENSP00000056217,9606.ENSP00000164024,9606.ENSP00000200453,9606.ENSP00000209728,9606.ENSP00000212015,9606.ENSP00000215631,9606.ENSP00000216037,9606.ENSP00000220325,9606.ENSP00000220751,9606.ENSP00000228872,9606.ENSP00000229416,9606.ENSP00000230990,9606.ENSP00000235382,9606.ENSP00000239223,9606.ENSP00000239938,9606.ENSP00000244869,9606.ENSP00000248244,…	MAP4K5,GPRC5A,ARHGEF5,CELSR3,PPP1R15A,CDC6,SIRT1,GADD45B,XBP1,EHD4,RIPK2,CDKN1B,GCLC,HBEGF,RGS2,DUSP1,EGR1,EREG,TICAM1,LIF,RAF1,GDF15,CEP85,SESN2,PER2,ELP3,IRAK2,HUS1,RIPK1,SDCBP,DCUN1D5,THBS1,CCND2,SEMA7A,SPAG9,N4BP1,PRDX1,C19orf10,MAP3K8,BRD4,BIRC3,ACVR1,MAP4K3,CCNT2,MUL1,ALS2,RAPGEF2,IL11,DNAJC27,ICAM1,MAP3K13,ARRDC3,NRP1,MAPKAP1,GTF2H1,JDP2,ARRDC4,GAREM,AKAP8,FEM1A,TNFRSF10B,CDKN2B,PAK1,FER,F…
GO:0034976	response to endoplasmic reticulum stress	60	240	0.44	1.05e-08	9606.ENSP00000157812,9606.ENSP00000158771,9606.ENSP00000185150,9606.ENSP00000200453,9606.ENSP00000216037,9606.ENSP00000222803,9606.ENSP00000237455,9606.ENSP00000248958,9606.ENSP00000249356,9606.ENSP00000253063,9606.ENSP00000256383,9606.ENSP00000259335,9606.ENSP00000260356,9606.ENSP00000260643,9606.ENSP00000261942,9606.ENSP00000262139,9606.ENSP00000262947,9606.ENSP00000263202,9606.ENSP00000276431,…	PSMC4,DERL2,ERLEC1,PPP1R15A,XBP1,FKBP14,RNF103,SDF2L1,DNAJB9,SESN2,EIF2S1,KIAA0368,THBS1,PREB,FAF2,WIPI1,C19orf10,UFD1L,TNFRSF10B,NRBF2,TXNDC11,PDIA4,HSP90B1,RNF139,CEBPB,CXCL8,EIF2AK3,TBL2,ARFGAP1,CALR,PDIA5,HSPA5,YOD1,P4HB,SRPR,NPLOC4,CREB3,ATF3,VCP,PPP1R15B,JUN,PTPN1,BAK1,TSPYL2,ZBTB17,SYVN1,SEC31A,NFE2L2,HM13,VIMP,UBE2J2,CHAC1,HERPUD1,NCK1,SRPRB,ATP2A2,FICD,DDIT3,DNAJC3,BHLHA15
GO:0006950	response to stress	401	3267	0.13	2.73e-08	9606.ENSP00000013125,9606.ENSP00000064780,9606.ENSP00000157812,9606.ENSP00000158771,9606.ENSP00000164227,9606.ENSP00000179259,9606.ENSP00000185150,9606.ENSP00000200453,9606.ENSP00000212015,9606.ENSP00000215631,9606.ENSP00000216037,9606.ENSP00000216117,9606.ENSP00000216267,9606.ENSP00000216489,9606.ENSP00000216797,9606.ENSP00000220659,9606.ENSP00000220751,9606.ENSP00000221130,9606.ENSP00000221452,…	MAP4K5,RELT,PSMC4,DERL2,BCL3,C12orf5,ERLEC1,PPP1R15A,SIRT1,GADD45B,XBP1,HMOX1,BRD1,ALKBH1,NFKBIA,BRF2,RIPK2,GSR,RELB,FKBP14,SERPINE1,SETX,PPIF,AKAP10,NFKB1,CYP27B1,CDKN1B,CLEC4A,FGFR1OP2,GCLC,HBEGF,TUSC2,MSH6,RNF103,DUSP1,EGR1,KALRN,EREG,IRF1,INSIG2,PITHD1,TICAM1,SDF2L1,DNAJB9,EGLN3,RAF1,MICB,SESN2,DNAJB1,RRP8,PER2,H3F3B,KDM6B,IGHMBP2,BTG1,EIF2S1,IRAK2,TBX3,OASL,AKIRIN2,HUS1,KIAA0368,TOR1B,RIPK1,…
GO:0019220	regulation of phosphate metabolic process	230	1657	0.19	5.14e-08	9606.ENSP00000013125,9606.ENSP00000014914,9606.ENSP00000056217,9606.ENSP00000164024,9606.ENSP00000179259,9606.ENSP00000200453,9606.ENSP00000209728,9606.ENSP00000212015,9606.ENSP00000215631,9606.ENSP00000216037,9606.ENSP00000220325,9606.ENSP00000220751,9606.ENSP00000221086,9606.ENSP00000225174,9606.ENSP00000228515,9606.ENSP00000228872,9606.ENSP00000230361,9606.ENSP00000230990,9606.ENSP00000235382,…	MAP4K5,GPRC5A,ARHGEF5,CELSR3,C12orf5,PPP1R15A,CDC6,SIRT1,GADD45B,XBP1,EHD4,RIPK2,MTMR9,PPIF,CSRNP2,CDKN1B,GUCA1B,HBEGF,RGS2,DUSP1,EGR1,MPHOSPH10,EREG,LIF,RAF1,GDF15,CEP85,SESN2,ZCCHC9,ELP3,IRAK2,HUS1,RIPK1,SDCBP,THBS1,CCND2,SEMA7A,SPAG9,NLRC5,PRDX1,ELL,C19orf10,MAP3K8,BRD4,ACVR1,MAP4K3,CCNT2,MUL1,ALS2,RAPGEF2,IL11,DNAJC27,ICAM1,MAP3K13,NRP1,MAPKAP1,GTF2H1,GAREM,AKAP8,TNFRSF10B,CDKN2B,NRBF2,PAK1,F…
GO:0031324	negative regulation of cellular metabolic process	316	2463	0.15	5.62e-08	9606.ENSP00000014914,9606.ENSP00000157600,9606.ENSP00000158771,9606.ENSP00000164227,9606.ENSP00000179259,9606.ENSP00000185150,9606.ENSP00000200453,9606.ENSP00000209728,9606.ENSP00000212015,9606.ENSP00000215631,9606.ENSP00000216037,9606.ENSP00000216117,9606.ENSP00000217402,9606.ENSP00000218516,9606.ENSP00000221086,9606.ENSP00000221452,9606.ENSP00000222329,9606.ENSP00000223095,9606.ENSP00000225174,…	GPRC5A,LMCD1,DERL2,BCL3,C12orf5,ERLEC1,PPP1R15A,CDC6,SIRT1,GADD45B,XBP1,HMOX1,CHMP4B,GLA,MTMR9,RELB,ERF,SERPINE1,PPIF,RASD1,NFKB1,CSRNP2,CYP27B1,CDKN1B,GCLC,HBEGF,DLX2,MSH6,RGS2,DUSP1,EGR1,BHLHE41,ORMDL2,SNAI1,MPHOSPH10,EREG,IRF1,INSIG2,FOSB,LIF,DLL4,FXR2,RAF1,JUND,CEP85,SESN2,ZCCHC9,RARA,THAP1,DNAJB1,RRP8,PER2,H3F3B,EIF2S1,MBD2,BHLHE40,TBX3,BACH2,AKIRIN2,HUS1,SDCBP,USP2,THBS1,TRIM37,N4BP1,ACIN1,…
GO:1902531	regulation of intracellular signal transduction	241	1764	0.18	6.72e-08	9606.ENSP00000013125,9606.ENSP00000033079,9606.ENSP00000056217,9606.ENSP00000157600,9606.ENSP00000164227,9606.ENSP00000198767,9606.ENSP00000202556,9606.ENSP00000212015,9606.ENSP00000215631,9606.ENSP00000216037,9606.ENSP00000216373,9606.ENSP00000216797,9606.ENSP00000220507,9606.ENSP00000220751,9606.ENSP00000225174,9606.ENSP00000230990,9606.ENSP00000235382,9606.ENSP00000239223,9606.ENSP00000240874,…	MAP4K5,FAM13B,ARHGEF5,LMCD1,BCL3,RRN3,PPP1R13B,SIRT1,GADD45B,XBP1,SOS2,NFKBIA,RHOV,RIPK2,PPIF,HBEGF,RGS2,DUSP1,KALRN,SNAI1,EREG,PLAGL2,TICAM1,LIF,RAF1,GDF15,SESN2,IRAK2,RIPK1,IER3,SDCBP,THBS1,BCL2L10,ARHGAP29,SEMA7A,SPAG9,PRDX1,C19orf10,MAP3K8,UFD1L,BRD4,BIRC3,MAP4K3,SLC9A1,MUL1,ALS2,RAPGEF2,IL11,DNAJC27,ICAM1,MAP3K13,GOLPH3,ARRDC3,NRP1,MAPKAP1,RHOF,CRTC3,TAF4B,GAREM,RHOB,TNFRSF10B,PAK1,CGNL1,FBX…
GO:0080134	regulation of response to stress	189	1299	0.21	8.42e-08	9606.ENSP00000013125,9606.ENSP00000056217,9606.ENSP00000158771,9606.ENSP00000179259,9606.ENSP00000185150,9606.ENSP00000200453,9606.ENSP00000212015,9606.ENSP00000215631,9606.ENSP00000216037,9606.ENSP00000216085,9606.ENSP00000216797,9606.ENSP00000220751,9606.ENSP00000221452,9606.ENSP00000223095,9606.ENSP00000226574,9606.ENSP00000229332,9606.ENSP00000230990,9606.ENSP00000244050,9606.ENSP00000244869,…	MAP4K5,ARHGEF5,DERL2,C12orf5,ERLEC1,PPP1R15A,SIRT1,GADD45B,XBP1,RHBDD3,NFKBIA,RIPK2,RELB,SERPINE1,NFKB1,CLEC4A,HBEGF,SNAI1,EREG,IRF1,TICAM1,DNAJB9,RAF1,MICB,SESN2,DNAJB1,IRAK2,TRAFD1,RIPK1,IER3,SDCBP,THBS1,SEMA7A,SPAG9,PIK3C3,NLRC5,PRDX1,UFD1L,BRD4,BIRC3,MUL1,FEM1A,PLK2,PAK1,PPP4C,FBXW7,HSPB8,UBASH3B,SH3RF1,PPARG,HMGCR,IFNGR2,STAT5B,FGF19,SENP2,F2RL1,TSC1,HSP90B1,TERF2IP,CRK,FADD,IL12A,ADORA2B,PR…
GO:0009968	negative regulation of signal transduction	173	1160	0.22	9.18e-08	9606.ENSP00000014914,9606.ENSP00000164227,9606.ENSP00000166139,9606.ENSP00000198767,9606.ENSP00000200453,9606.ENSP00000212015,9606.ENSP00000216037,9606.ENSP00000216117,9606.ENSP00000216797,9606.ENSP00000223095,9606.ENSP00000225174,9606.ENSP00000229416,9606.ENSP00000234198,9606.ENSP00000235382,9606.ENSP00000239223,9606.ENSP00000239882,9606.ENSP00000239938,9606.ENSP00000244050,9606.ENSP00000248244,…	GPRC5A,BCL3,FSTL3,RRN3,PPP1R15A,SIRT1,XBP1,HMOX1,NFKBIA,SERPINE1,PPIF,GCLC,DLX2,RGS2,DUSP1,ELF1,EGR1,SNAI1,TICAM1,LIF,DNAJB9,DLL4,RAF1,GDF15,SESN2,RIPK1,THBS1,BCL2L10,NLRC5,UFD1L,IL1A,ACVR1,MUL1,ICAM1,ARRDC3,LEF1,FSTL4,NRP1,MAPKAP1,CRTC3,TNFRSF10B,CGNL1,FBXW7,PTPRR,UBASH3B,SH3RF1,FLCN,PPARG,HMGCR,BRAF,DUSP2,SENP2,F2RL1,TSC1,DUSP16,ARHGAP42,TMEM88,FADD,CXCL8,VASN,DDIT4,ADAM17,TRIB1,CFLAR,DAB2,PER1…
GO:0042981	regulation of apoptotic process	211	1501	0.19	1.08e-07	9606.ENSP00000013125,9606.ENSP00000056217,9606.ENSP00000064780,9606.ENSP00000164227,9606.ENSP00000179259,9606.ENSP00000198767,9606.ENSP00000202556,9606.ENSP00000209884,9606.ENSP00000212015,9606.ENSP00000215631,9606.ENSP00000216037,9606.ENSP00000216117,9606.ENSP00000216373,9606.ENSP00000216489,9606.ENSP00000216797,9606.ENSP00000220751,9606.ENSP00000223095,9606.ENSP00000224140,9606.ENSP00000225174,…	MAP4K5,ARHGEF5,RELT,BCL3,C12orf5,RRN3,PPP1R13B,KLHL20,SIRT1,GADD45B,XBP1,HMOX1,SOS2,ALKBH1,NFKBIA,RIPK2,SERPINE1,SETX,PPIF,NFKB1,ZPR1,CDKN1B,GCLC,BNIP1,DUSP1,EGR1,KALRN,SNAI1,PLAGL2,SDF2L1,EGLN3,RAF1,GDF15,RARA,BTG1,EIF2S1,TBX3,RIPK1,IER3,THBS1,BCL2L10,CCND2,ACIN1,C19orf10,MAP3K8,IL1A,BIRC3,ACVR1,MAP4K3,SLC9A1,MUL1,RAPGEF2,ICAM1,GOLPH3,LEF1,NRP1,GAL,SIK1,RHOB,PLK2,TNFRSF10B,PAK1,FBXW7,SH3RF1,FLCN…
GO:0043067	regulation of programmed cell death	212	1516	0.19	1.43e-07	9606.ENSP00000013125,9606.ENSP00000056217,9606.ENSP00000064780,9606.ENSP00000164227,9606.ENSP00000179259,9606.ENSP00000198767,9606.ENSP00000202556,9606.ENSP00000209884,9606.ENSP00000212015,9606.ENSP00000215631,9606.ENSP00000216037,9606.ENSP00000216117,9606.ENSP00000216373,9606.ENSP00000216489,9606.ENSP00000216797,9606.ENSP00000220751,9606.ENSP00000223095,9606.ENSP00000224140,9606.ENSP00000225174,…	MAP4K5,ARHGEF5,RELT,BCL3,C12orf5,RRN3,PPP1R13B,KLHL20,SIRT1,GADD45B,XBP1,HMOX1,SOS2,ALKBH1,NFKBIA,RIPK2,SERPINE1,SETX,PPIF,NFKB1,ZPR1,CDKN1B,GCLC,BNIP1,DUSP1,EGR1,KALRN,SNAI1,PLAGL2,SDF2L1,EGLN3,RAF1,GDF15,RARA,BTG1,EIF2S1,TBX3,RIPK1,IER3,THBS1,BCL2L10,CCND2,ACIN1,C19orf10,MAP3K8,IL1A,BIRC3,ACVR1,MAP4K3,SLC9A1,MUL1,RAPGEF2,ICAM1,GOLPH3,LEF1,NRP1,GAL,SIK1,RHOB,PLK2,TNFRSF10B,PAK1,SLC25A4,FBXW7,SH3…
GO:0009892	negative regulation of metabolic process	344	2762	0.14	1.64e-07	9606.ENSP00000014914,9606.ENSP00000157600,9606.ENSP00000158771,9606.ENSP00000164227,9606.ENSP00000179259,9606.ENSP00000185150,9606.ENSP00000200453,9606.ENSP00000209728,9606.ENSP00000212015,9606.ENSP00000215631,9606.ENSP00000216037,9606.ENSP00000216117,9606.ENSP00000217402,9606.ENSP00000218516,9606.ENSP00000221086,9606.ENSP00000221452,9606.ENSP00000222329,9606.ENSP00000223095,9606.ENSP00000225174,…	GPRC5A,LMCD1,DERL2,BCL3,C12orf5,ERLEC1,PPP1R15A,CDC6,SIRT1,GADD45B,XBP1,HMOX1,CHMP4B,GLA,MTMR9,RELB,ERF,SERPINE1,PPIF,RASD1,NFKB1,CSRNP2,CYP27B1,CDKN1B,GCLC,HBEGF,DLX2,MSH6,RGS2,DUSP1,EGR1,BHLHE41,ORMDL2,SNAI1,MPHOSPH10,EREG,IRF1,INSIG2,FOSB,LIF,DLL4,FXR2,RAF1,JUND,CEP85,SESN2,ZCCHC9,RARA,THAP1,DNAJB1,RRP8,PER2,H3F3B,EIF2S1,MBD2,BHLHE40,TBX3,BACH2,AKIRIN2,HUS1,SDCBP,USP2,THBS1,TRIM37,N4BP1,ACIN1,…
GO:0048585	negative regulation of response to stimulus	208	1483	0.19	1.64e-07	9606.ENSP00000014914,9606.ENSP00000158771,9606.ENSP00000164227,9606.ENSP00000166139,9606.ENSP00000185150,9606.ENSP00000198767,9606.ENSP00000200453,9606.ENSP00000212015,9606.ENSP00000216037,9606.ENSP00000216117,9606.ENSP00000216797,9606.ENSP00000223095,9606.ENSP00000225174,9606.ENSP00000226574,9606.ENSP00000229416,9606.ENSP00000234198,9606.ENSP00000235382,9606.ENSP00000239223,9606.ENSP00000239882,…	GPRC5A,DERL2,BCL3,FSTL3,ERLEC1,RRN3,PPP1R15A,SIRT1,XBP1,HMOX1,NFKBIA,SERPINE1,PPIF,NFKB1,GCLC,DLX2,RGS2,DUSP1,ELF1,EGR1,SNAI1,TICAM1,LIF,DNAJB9,DLL4,RAF1,MICB,GDF15,SESN2,TRAFD1,RIPK1,THBS1,BCL2L10,NLRC5,UFD1L,IL1A,BRD4,ACVR1,MUL1,ICAM1,ARRDC3,LEF1,FSTL4,NRP1,MAPKAP1,CRTC3,FEM1A,PLK2,TNFRSF10B,FER,CGNL1,FBXW7,PTPRR,UBASH3B,SH3RF1,FLCN,PPARG,HMGCR,BRAF,DUSP2,SENP2,NDUFAF2,F2RL1,TSC1,DUSP16,ARHGAP4…
GO:0042325	regulation of phosphorylation	206	1465	0.19	1.64e-07	9606.ENSP00000013125,9606.ENSP00000014914,9606.ENSP00000056217,9606.ENSP00000164024,9606.ENSP00000179259,9606.ENSP00000209728,9606.ENSP00000212015,9606.ENSP00000215631,9606.ENSP00000216037,9606.ENSP00000220325,9606.ENSP00000220751,9606.ENSP00000225174,9606.ENSP00000228872,9606.ENSP00000230990,9606.ENSP00000235382,9606.ENSP00000239223,9606.ENSP00000239938,9606.ENSP00000244869,9606.ENSP00000249075,…	MAP4K5,GPRC5A,ARHGEF5,CELSR3,C12orf5,CDC6,SIRT1,GADD45B,XBP1,EHD4,RIPK2,PPIF,CDKN1B,HBEGF,RGS2,DUSP1,EGR1,EREG,LIF,RAF1,GDF15,CEP85,SESN2,ELP3,IRAK2,HUS1,RIPK1,SDCBP,THBS1,CCND2,SEMA7A,SPAG9,NLRC5,PRDX1,C19orf10,MAP3K8,BRD4,ACVR1,MAP4K3,CCNT2,MUL1,ALS2,RAPGEF2,IL11,DNAJC27,ICAM1,MAP3K13,NRP1,MAPKAP1,GTF2H1,GAREM,AKAP8,TNFRSF10B,CDKN2B,NRBF2,PAK1,FER,FBXW7,PTPRR,UBASH3B,SH3RF1,FLCN,PRKAG2,HMGCR,BR…
GO:0051726	regulation of cell cycle	168	1129	0.22	1.77e-07	9606.ENSP00000013125,9606.ENSP00000200453,9606.ENSP00000202556,9606.ENSP00000209728,9606.ENSP00000212015,9606.ENSP00000215631,9606.ENSP00000215904,9606.ENSP00000216420,9606.ENSP00000217402,9606.ENSP00000228872,9606.ENSP00000239223,9606.ENSP00000244869,9606.ENSP00000245414,9606.ENSP00000249075,9606.ENSP00000252818,9606.ENSP00000252992,9606.ENSP00000254066,9606.ENSP00000254101,9606.ENSP00000254250,…	MAP4K5,PPP1R15A,PPP1R13B,CDC6,SIRT1,GADD45B,PDXP,CGRRF1,CHMP4B,CDKN1B,DUSP1,EREG,IRF1,LIF,JUND,CEP85,RARA,PRKAB2,THAP1,RRP8,PER2,TBX3,TBRG4,HUS1,SDCBP,USP2,THBS1,HAUS2,CCND2,PIK3C3,TRIM37,MAP3K8,EPC1,IL1A,BRD4,ARID3A,MAP4K3,CCNT2,LEF1,GTF2H1,SIK1,RHOB,DYNC1LI1,PLK2,CDKN2B,PAK1,ORAOV1,FBXW7,TRIM36,RIOK2,FLCN,WHAMM,NSMCE2,PRKAG2,BTG2,STAT5B,TGFA,CCNL1,SENP2,TSC1,TUBA1A,LIN37,AURKC,IL12A,JUNB,CDC25A…
GO:0009966	regulation of signal transduction	371	3033	0.13	2.04e-07	9606.ENSP00000013125,9606.ENSP00000014914,9606.ENSP00000033079,9606.ENSP00000056217,9606.ENSP00000157600,9606.ENSP00000164227,9606.ENSP00000166139,9606.ENSP00000198767,9606.ENSP00000200453,9606.ENSP00000202556,9606.ENSP00000212015,9606.ENSP00000215631,9606.ENSP00000216037,9606.ENSP00000216117,9606.ENSP00000216373,9606.ENSP00000216489,9606.ENSP00000216797,9606.ENSP00000220507,9606.ENSP00000220751,…	MAP4K5,GPRC5A,FAM13B,ARHGEF5,LMCD1,BCL3,FSTL3,RRN3,PPP1R15A,PPP1R13B,SIRT1,GADD45B,XBP1,HMOX1,SOS2,ALKBH1,NFKBIA,RHOV,RIPK2,NAMPT,STX1A,SERPINE1,PPIF,NFKB1,CYP27B1,GCLC,GUCA1B,HBEGF,DLX2,RGS2,DUSP1,ELF1,EGR1,KALRN,SNAI1,EREG,IRF1,TNFSF9,PLAGL2,TICAM1,LIF,DNAJB9,DLL4,RAF1,SAFB2,GDF15,SESN2,JAG1,MBD2,IRAK2,RIPK1,IER3,SDCBP,THBS1,BCL2L10,ARHGAP29,SEMA7A,SPAG9,NLRC5,PRDX1,C19orf10,MAP3K8,UFD1L,IL1A,B…
GO:0010648	negative regulation of cell communication	182	1255	0.21	2.04e-07	9606.ENSP00000014914,9606.ENSP00000164227,9606.ENSP00000166139,9606.ENSP00000198767,9606.ENSP00000200453,9606.ENSP00000212015,9606.ENSP00000216037,9606.ENSP00000216117,9606.ENSP00000216797,9606.ENSP00000223095,9606.ENSP00000225174,9606.ENSP00000229416,9606.ENSP00000234198,9606.ENSP00000235382,9606.ENSP00000239223,9606.ENSP00000239882,9606.ENSP00000239938,9606.ENSP00000240874,9606.ENSP00000244050,…	GPRC5A,BCL3,FSTL3,RRN3,PPP1R15A,SIRT1,XBP1,HMOX1,NFKBIA,SERPINE1,PPIF,GCLC,DLX2,RGS2,DUSP1,ELF1,EGR1,KALRN,SNAI1,TICAM1,LIF,DNAJB9,DLL4,RAF1,GDF15,SESN2,RAB11FIP5,RIPK1,THBS1,BCL2L10,NLRC5,UFD1L,IL1A,ACVR1,MUL1,IL11,ICAM1,ARRDC3,LEF1,FSTL4,SRF,NRP1,MAPKAP1,CRTC3,PLK2,TNFRSF10B,CGNL1,FBXW7,PTPRR,UBASH3B,SH3RF1,FLCN,PPARG,HMGCR,BRAF,DUSP2,SENP2,NDUFAF2,F2RL1,TSC1,DUSP16,ARHGAP42,MIDN,TMEM88,FADD,CX…
GO:0080135	regulation of cellular response to stress	107	618	0.28	2.04e-07	9606.ENSP00000013125,9606.ENSP00000056217,9606.ENSP00000158771,9606.ENSP00000179259,9606.ENSP00000185150,9606.ENSP00000200453,9606.ENSP00000212015,9606.ENSP00000215631,9606.ENSP00000216037,9606.ENSP00000220751,9606.ENSP00000244050,9606.ENSP00000249356,9606.ENSP00000254322,9606.ENSP00000259808,9606.ENSP00000259874,9606.ENSP00000260130,9606.ENSP00000262013,9606.ENSP00000262746,9606.ENSP00000263377,…	MAP4K5,ARHGEF5,DERL2,C12orf5,ERLEC1,PPP1R15A,SIRT1,GADD45B,XBP1,RIPK2,SNAI1,DNAJB9,DNAJB1,RIPK1,IER3,SDCBP,SPAG9,PRDX1,BRD4,MUL1,PLK2,PAK1,PPP4C,FBXW7,HSPB8,SH3RF1,HMGCR,FGF19,SENP2,F2RL1,TSC1,TERF2IP,EIF2AK3,ZNF622,PER1,CLU,DVL3,HSPH1,RNF168,HSPA5,KARS,PMAIP1,YOD1,P4HB,NDEL1,CAV1,CREB3,INSIG1,PPP4R2,SFPQ,LRIG2,DUSP10,DYRK3,PPP1R15B,IER5,CTGF,MCL1,BAG3,GADD45A,PTPN1,ANKRD1,ZC3H12A,EYA3,DKK1,BAK1,…
GO:0023057	negative regulation of signaling	182	1258	0.21	2.32e-07	9606.ENSP00000014914,9606.ENSP00000164227,9606.ENSP00000166139,9606.ENSP00000198767,9606.ENSP00000200453,9606.ENSP00000212015,9606.ENSP00000216037,9606.ENSP00000216117,9606.ENSP00000216797,9606.ENSP00000223095,9606.ENSP00000225174,9606.ENSP00000229416,9606.ENSP00000234198,9606.ENSP00000235382,9606.ENSP00000239223,9606.ENSP00000239882,9606.ENSP00000239938,9606.ENSP00000240874,9606.ENSP00000244050,…	GPRC5A,BCL3,FSTL3,RRN3,PPP1R15A,SIRT1,XBP1,HMOX1,NFKBIA,SERPINE1,PPIF,GCLC,DLX2,RGS2,DUSP1,ELF1,EGR1,KALRN,SNAI1,TICAM1,LIF,DNAJB9,DLL4,RAF1,GDF15,SESN2,RAB11FIP5,RIPK1,THBS1,BCL2L10,NLRC5,UFD1L,IL1A,ACVR1,MUL1,IL11,ICAM1,ARRDC3,LEF1,FSTL4,SRF,NRP1,MAPKAP1,CRTC3,PLK2,TNFRSF10B,CGNL1,FBXW7,PTPRR,UBASH3B,SH3RF1,FLCN,PPARG,HMGCR,BRAF,DUSP2,SENP2,NDUFAF2,F2RL1,TSC1,DUSP16,ARHGAP42,MIDN,TMEM88,FADD,CX…
GO:0010033	response to organic substance	348	2815	0.14	2.53e-07	9606.ENSP00000064780,9606.ENSP00000157812,9606.ENSP00000158771,9606.ENSP00000171111,9606.ENSP00000185150,9606.ENSP00000209728,9606.ENSP00000209884,9606.ENSP00000212015,9606.ENSP00000215904,9606.ENSP00000216037,9606.ENSP00000216117,9606.ENSP00000216797,9606.ENSP00000220325,9606.ENSP00000220751,9606.ENSP00000221452,9606.ENSP00000222553,9606.ENSP00000222803,9606.ENSP00000222812,9606.ENSP00000223095,…	RELT,PSMC4,DERL2,KEAP1,ERLEC1,CDC6,KLHL20,SIRT1,PDXP,XBP1,HMOX1,NFKBIA,EHD4,RIPK2,RELB,NAMPT,FKBP14,STX1A,SERPINE1,SETX,NFKB1,ZPR1,IL10RA,CYP27B1,CDKN1B,GCLC,RGS2,RNF103,DUSP1,EGR1,KALRN,EGR2,EREG,IRF1,INSIG2,TNFSF9,FOSB,TICAM1,SDF2L1,LIF,DNAJB9,DLL4,RAF1,MED17,MICB,GDF15,JUND,NUMBL,SESN2,RARA,DNAJB1,JAG1,BTG1,EIF2S1,MBD2,IRAK2,OASL,TRAFD1,AKIRIN2,RAB11FIP5,KIAA0368,TOR1B,RIPK1,THBS1,PREB,MAPK6,F…
GO:0034620	cellular response to unfolded protein	36	115	0.54	3.85e-07	9606.ENSP00000158771,9606.ENSP00000216037,9606.ENSP00000222803,9606.ENSP00000249356,9606.ENSP00000256383,9606.ENSP00000260643,9606.ENSP00000262139,9606.ENSP00000262947,9606.ENSP00000299767,9606.ENSP00000306512,9606.ENSP00000307235,9606.ENSP00000307260,9606.ENSP00000314615,9606.ENSP00000320866,9606.ENSP00000323313,9606.ENSP00000324173,9606.ENSP00000326813,9606.ENSP00000328023,9606.ENSP00000342136,…	DERL2,XBP1,FKBP14,DNAJB9,EIF2S1,PREB,WIPI1,C19orf10,HSP90B1,CXCL8,EIF2AK3,TBL2,ARFGAP1,CALR,PDIA5,HSPA5,YOD1,SRPR,CREB3,ATF3,VCP,PTPN1,BAK1,DAXX,TSPYL2,ZBTB17,SYVN1,OPTN,SEC31A,NFE2L2,VIMP,HERPUD1,SRPRB,DDIT3,DNAJC3,BHLHA15
GO:0051247	positive regulation of protein metabolic process	216	1587	0.18	6.63e-07	9606.ENSP00000013125,9606.ENSP00000056217,9606.ENSP00000157812,9606.ENSP00000164227,9606.ENSP00000171111,9606.ENSP00000200453,9606.ENSP00000209728,9606.ENSP00000212015,9606.ENSP00000215631,9606.ENSP00000216037,9606.ENSP00000216085,9606.ENSP00000216117,9606.ENSP00000216797,9606.ENSP00000220325,9606.ENSP00000220751,9606.ENSP00000228872,9606.ENSP00000229416,9606.ENSP00000230990,9606.ENSP00000239938,…	MAP4K5,ARHGEF5,PSMC4,BCL3,KEAP1,PPP1R15A,CDC6,SIRT1,GADD45B,XBP1,RHBDD3,HMOX1,NFKBIA,EHD4,RIPK2,CDKN1B,GCLC,HBEGF,EGR1,EREG,IRF1,TICAM1,LIF,EGLN3,RAF1,GDF15,IRAK2,AKIRIN2,RIPK1,SDCBP,DCUN1D5,THBS1,BCL2L10,CCND2,SEMA7A,SPAG9,C19orf10,MAP3K8,IL1A,BIRC3,ACVR1,MAP4K3,CCNT2,MUL1,ALS2,RAPGEF2,IL11,DNAJC27,ICAM1,MAP3K13,ARRDC3,NRP1,MAPKAP1,JDP2,ARRDC4,GAREM,AKAP8,POLR2D,PLK2,TNFRSF10B,PAK1,FBXW7,NIPBL,S…
GO:0035967	cellular response to topologically incorrect protein	38	132	0.5	9.58e-07	9606.ENSP00000158771,9606.ENSP00000216037,9606.ENSP00000222803,9606.ENSP00000248958,9606.ENSP00000249356,9606.ENSP00000256383,9606.ENSP00000260643,9606.ENSP00000262139,9606.ENSP00000262947,9606.ENSP00000263202,9606.ENSP00000299767,9606.ENSP00000306512,9606.ENSP00000307235,9606.ENSP00000307260,9606.ENSP00000314615,9606.ENSP00000320866,9606.ENSP00000323313,9606.ENSP00000324173,9606.ENSP00000326813,…	DERL2,XBP1,FKBP14,SDF2L1,DNAJB9,EIF2S1,PREB,WIPI1,C19orf10,UFD1L,HSP90B1,CXCL8,EIF2AK3,TBL2,ARFGAP1,CALR,PDIA5,HSPA5,YOD1,SRPR,CREB3,ATF3,VCP,PTPN1,BAK1,DAXX,TSPYL2,ZBTB17,SYVN1,OPTN,SEC31A,NFE2L2,VIMP,HERPUD1,SRPRB,DDIT3,DNAJC3,BHLHA15
GO:0048583	regulation of response to stimulus	451	3882	0.11	1.02e-06	9606.ENSP00000013125,9606.ENSP00000014914,9606.ENSP00000033079,9606.ENSP00000056217,9606.ENSP00000157600,9606.ENSP00000158771,9606.ENSP00000164227,9606.ENSP00000166139,9606.ENSP00000179259,9606.ENSP00000185150,9606.ENSP00000198767,9606.ENSP00000200453,9606.ENSP00000202556,9606.ENSP00000212015,9606.ENSP00000215631,9606.ENSP00000216037,9606.ENSP00000216085,9606.ENSP00000216117,9606.ENSP00000216373,…	MAP4K5,GPRC5A,FAM13B,ARHGEF5,LMCD1,DERL2,BCL3,FSTL3,C12orf5,ERLEC1,RRN3,PPP1R15A,PPP1R13B,SIRT1,GADD45B,XBP1,RHBDD3,HMOX1,SOS2,ALKBH1,NFKBIA,RHOV,RIPK2,RELB,NAMPT,STX1A,SERPINE1,PPIF,NFKB1,CYP27B1,CLEC4A,GCLC,GUCA1B,HBEGF,DLX2,MSH6,RGS2,DUSP1,ELF1,EGR1,KALRN,SNAI1,EREG,IRF1,TNFSF9,PLAGL2,TICAM1,LIF,DNAJB9,DLL4,RAF1,MICB,SAFB2,GDF15,SESN2,RARA,DNAJB1,PER2,JAG1,MBD2,IRAK2,TRAFD1,RIPK1,IER3,SDCBP,TH…
GO:0030968	endoplasmic reticulum unfolded protein response	33	103	0.55	1.02e-06	9606.ENSP00000158771,9606.ENSP00000216037,9606.ENSP00000222803,9606.ENSP00000249356,9606.ENSP00000256383,9606.ENSP00000260643,9606.ENSP00000262139,9606.ENSP00000262947,9606.ENSP00000299767,9606.ENSP00000306512,9606.ENSP00000307235,9606.ENSP00000307260,9606.ENSP00000314615,9606.ENSP00000320866,9606.ENSP00000323313,9606.ENSP00000324173,9606.ENSP00000326813,9606.ENSP00000328023,9606.ENSP00000342136,…	DERL2,XBP1,FKBP14,DNAJB9,EIF2S1,PREB,WIPI1,C19orf10,HSP90B1,CXCL8,EIF2AK3,TBL2,ARFGAP1,CALR,PDIA5,HSPA5,YOD1,SRPR,CREB3,ATF3,VCP,PTPN1,TSPYL2,ZBTB17,SYVN1,SEC31A,NFE2L2,VIMP,HERPUD1,SRPRB,DDIT3,DNAJC3,BHLHA15
GO:0010646	regulation of cell communication	395	3327	0.12	1.26e-06	9606.ENSP00000013125,9606.ENSP00000014914,9606.ENSP00000033079,9606.ENSP00000056217,9606.ENSP00000157600,9606.ENSP00000164227,9606.ENSP00000166139,9606.ENSP00000198767,9606.ENSP00000200453,9606.ENSP00000202556,9606.ENSP00000212015,9606.ENSP00000215631,9606.ENSP00000216037,9606.ENSP00000216117,9606.ENSP00000216373,9606.ENSP00000216489,9606.ENSP00000216797,9606.ENSP00000220507,9606.ENSP00000220751,…	MAP4K5,GPRC5A,FAM13B,ARHGEF5,LMCD1,BCL3,FSTL3,RRN3,PPP1R15A,PPP1R13B,SIRT1,GADD45B,XBP1,HMOX1,SOS2,ALKBH1,NFKBIA,RHOV,RIPK2,NAMPT,STX1A,SERPINE1,PPIF,NFKB1,CYP27B1,GCLC,GUCA1B,HBEGF,DLX2,RGS2,DUSP1,ELF1,EGR1,KALRN,EGR2,SNAI1,EREG,IRF1,TNFSF9,PLAGL2,TICAM1,LIF,DNAJB9,DLL4,RAF1,SAFB2,GDF15,SESN2,RARA,PER2,JAG1,MBD2,IRAK2,RAB11FIP5,RIPK1,IER3,SDCBP,THBS1,BCL2L10,ARHGAP29,SEMA7A,SPAG9,NLRC5,PRDX1,C19…
GO:0023051	regulation of signaling	398	3360	0.12	1.38e-06	9606.ENSP00000013125,9606.ENSP00000014914,9606.ENSP00000033079,9606.ENSP00000056217,9606.ENSP00000157600,9606.ENSP00000164227,9606.ENSP00000166139,9606.ENSP00000198767,9606.ENSP00000200453,9606.ENSP00000202556,9606.ENSP00000212015,9606.ENSP00000215631,9606.ENSP00000216037,9606.ENSP00000216117,9606.ENSP00000216373,9606.ENSP00000216489,9606.ENSP00000216797,9606.ENSP00000220507,9606.ENSP00000220751,…	MAP4K5,GPRC5A,FAM13B,ARHGEF5,LMCD1,BCL3,FSTL3,RRN3,PPP1R15A,PPP1R13B,SIRT1,GADD45B,XBP1,HMOX1,SOS2,ALKBH1,NFKBIA,RHOV,RIPK2,NAMPT,STX1A,SERPINE1,PPIF,NFKB1,CYP27B1,GCLC,GUCA1B,HBEGF,DLX2,RGS2,DUSP1,ELF1,EGR1,KALRN,EGR2,SNAI1,EREG,IRF1,TNFSF9,PLAGL2,TICAM1,LIF,DNAJB9,DLL4,RAF1,SAFB2,GDF15,SESN2,RARA,PER2,JAG1,MBD2,IRAK2,RAB11FIP5,RIPK1,IER3,SDCBP,THBS1,BCL2L10,ARHGAP29,SEMA7A,SPAG9,NLRC5,PRDX1,C19…
GO:0051172	negative regulation of nitrogen compound metabolic process	290	2307	0.14	1.66e-06	9606.ENSP00000014914,9606.ENSP00000157600,9606.ENSP00000158771,9606.ENSP00000164227,9606.ENSP00000179259,9606.ENSP00000185150,9606.ENSP00000200453,9606.ENSP00000209728,9606.ENSP00000212015,9606.ENSP00000215631,9606.ENSP00000216037,9606.ENSP00000218516,9606.ENSP00000221452,9606.ENSP00000222329,9606.ENSP00000223095,9606.ENSP00000225174,9606.ENSP00000225688,9606.ENSP00000226574,9606.ENSP00000228872,…	GPRC5A,LMCD1,DERL2,BCL3,C12orf5,ERLEC1,PPP1R15A,CDC6,SIRT1,GADD45B,XBP1,GLA,RELB,ERF,SERPINE1,PPIF,RASD1,NFKB1,CDKN1B,GCLC,HBEGF,DLX2,MSH6,RGS2,DUSP1,EGR1,BHLHE41,ORMDL2,SNAI1,EREG,IRF1,FOSB,LIF,DLL4,FXR2,RAF1,JUND,CEP85,SESN2,RARA,THAP1,DNAJB1,RRP8,PER2,H3F3B,EIF2S1,MBD2,BHLHE40,TBX3,BACH2,AKIRIN2,HUS1,SDCBP,USP2,THBS1,TRIM37,N4BP1,ACIN1,EPC1,BIRC3,MXD1,ASB1,LEF1,SRF,CREM,BTAF1,JDP2,TNFRSF10B,CD…
GO:1901564	organonitrogen compound metabolic process	584	5281	0.09	2.4e-06	9606.ENSP00000013125,9606.ENSP00000053468,9606.ENSP00000157600,9606.ENSP00000157812,9606.ENSP00000158771,9606.ENSP00000161006,9606.ENSP00000166139,9606.ENSP00000171111,9606.ENSP00000185150,9606.ENSP00000200453,9606.ENSP00000209884,9606.ENSP00000212015,9606.ENSP00000215904,9606.ENSP00000216037,9606.ENSP00000216039,9606.ENSP00000216085,9606.ENSP00000216117,9606.ENSP00000216267,9606.ENSP00000216797,…	MAP4K5,MRPS10,LMCD1,PSMC4,DERL2,PRSS22,FSTL3,KEAP1,ERLEC1,PPP1R15A,KLHL20,SIRT1,PDXP,XBP1,JOSD1,RHBDD3,HMOX1,BRD1,NFKBIA,CHMP4B,GLA,PSMD7,RIPK2,GSR,NAMPT,FKBP14,CYP3A5,SETX,PPIF,NFKB1,PDHX,PRDM4,CDKN1B,FGFR1OP2,GCLC,HARS2,HBEGF,RARS,UMPS,KLHL18,PCGF1,ODC1,PRDM2,SLC19A2,TBPL1,FBXO30,RNF103,ABCG2,DUSP1,ALG5,KALRN,EGR2,RNF11,ORMDL2,EREG,WNK4,FBXL12,SDF2L1,LIF,DNAJB9,EGLN3,CDADC1,DHX29,RAF1,TRPC4AP,N…
GO:0070647	protein modification by small protein conjugation or removal	141	945	0.22	2.85e-06	9606.ENSP00000157812,9606.ENSP00000171111,9606.ENSP00000209884,9606.ENSP00000212015,9606.ENSP00000216039,9606.ENSP00000216797,9606.ENSP00000219313,9606.ENSP00000232766,9606.ENSP00000233630,9606.ENSP00000237281,9606.ENSP00000237455,9606.ENSP00000242480,9606.ENSP00000242719,9606.ENSP00000247977,9606.ENSP00000252015,9606.ENSP00000255304,9606.ENSP00000255764,9606.ENSP00000256257,9606.ENSP00000257749,…	PSMC4,KEAP1,KLHL20,SIRT1,JOSD1,NFKBIA,PSMD7,KLHL18,PCGF1,FBXO30,RNF103,EGR2,RNF11,FBXL12,TRPC4AP,USPL1,MED10,RNF122,BACH2,RIPK1,USP2,DCUN1D5,PSMD11,TRIM37,WSB1,UFD1L,BIRC3,MUL1,ASB1,PSMD3,ARRDC4,FEM1A,FEM1C,FBXW7,USP12,TRIM36,SH3RF1,NSMCE2,MED8,MED27,RNF25,SENP2,FBXO33,UNKL,CDC25A,RNF139,DESI2,RNF181,TADA2B,RCE1,FBXO45,RBBP6,MALT1,DCUN1D3,RNF168,RCHY1,RNF10,SIAH2,UBE2O,YOD1,SPSB1,SOCS3,SMAD3,KLHL…
GO:0050790	regulation of catalytic activity	282	2249	0.14	3.27e-06	9606.ENSP00000013125,9606.ENSP00000014914,9606.ENSP00000033079,9606.ENSP00000056217,9606.ENSP00000179259,9606.ENSP00000200453,9606.ENSP00000209728,9606.ENSP00000212015,9606.ENSP00000215631,9606.ENSP00000218516,9606.ENSP00000220751,9606.ENSP00000221086,9606.ENSP00000223095,9606.ENSP00000225174,9606.ENSP00000226574,9606.ENSP00000228515,9606.ENSP00000228606,9606.ENSP00000228872,9606.ENSP00000230361,…	MAP4K5,GPRC5A,FAM13B,ARHGEF5,C12orf5,PPP1R15A,CDC6,SIRT1,GADD45B,GLA,RIPK2,MTMR9,SERPINE1,PPIF,NFKB1,CSRNP2,CYP27B1,CDKN1B,GUCA1B,MSH6,RGS2,DUSP1,EGR1,KALRN,MPHOSPH10,EREG,EGLN3,RAF1,GDF15,CEP85,SESN2,ZCCHC9,DNAJB1,ELP3,IRAK2,AKIRIN2,RIPK1,DCUN1D5,THBS1,BCL2L10,ARHGAP29,PREB,CCND2,FAF2,SPAG9,TMED2,NLRC5,ELL,MAP3K8,ARFGAP3,BIRC3,MAP4K3,CCNT2,MUL1,ALS2,RASGEF1B,RAPGEF2,PSMD3,MTRR,ICAM1,GRPEL1,MAP3K…
GO:0032270	positive regulation of cellular protein metabolic process	202	1496	0.18	3.36e-06	9606.ENSP00000013125,9606.ENSP00000056217,9606.ENSP00000157812,9606.ENSP00000164227,9606.ENSP00000171111,9606.ENSP00000200453,9606.ENSP00000209728,9606.ENSP00000212015,9606.ENSP00000215631,9606.ENSP00000216037,9606.ENSP00000216797,9606.ENSP00000220325,9606.ENSP00000220751,9606.ENSP00000228872,9606.ENSP00000229416,9606.ENSP00000230990,9606.ENSP00000239938,9606.ENSP00000244869,9606.ENSP00000248244,…	MAP4K5,ARHGEF5,PSMC4,BCL3,KEAP1,PPP1R15A,CDC6,SIRT1,GADD45B,XBP1,NFKBIA,EHD4,RIPK2,CDKN1B,GCLC,HBEGF,EGR1,EREG,TICAM1,LIF,EGLN3,RAF1,GDF15,IRAK2,AKIRIN2,RIPK1,SDCBP,DCUN1D5,THBS1,BCL2L10,CCND2,SEMA7A,SPAG9,C19orf10,MAP3K8,BIRC3,ACVR1,MAP4K3,CCNT2,MUL1,ALS2,RAPGEF2,IL11,DNAJC27,ICAM1,MAP3K13,ARRDC3,NRP1,MAPKAP1,JDP2,ARRDC4,GAREM,AKAP8,POLR2D,PLK2,TNFRSF10B,PAK1,FBXW7,NIPBL,SH3RF1,FLCN,NSMCE2,PPARG…
GO:1902532	negative regulation of intracellular signal transduction	89	514	0.28	3.9e-06	9606.ENSP00000164227,9606.ENSP00000198767,9606.ENSP00000212015,9606.ENSP00000216037,9606.ENSP00000225174,9606.ENSP00000235382,9606.ENSP00000239223,9606.ENSP00000244050,9606.ENSP00000249075,9606.ENSP00000253063,9606.ENSP00000259808,9606.ENSP00000260356,9606.ENSP00000260442,9606.ENSP00000263202,9606.ENSP00000264198,9606.ENSP00000265138,9606.ENSP00000265960,9606.ENSP00000268184,9606.ENSP00000281282,…	BCL3,RRN3,SIRT1,XBP1,PPIF,RGS2,DUSP1,SNAI1,LIF,SESN2,RIPK1,THBS1,BCL2L10,UFD1L,MUL1,ARRDC3,MAPKAP1,CRTC3,CGNL1,PTPRR,FLCN,HMGCR,DUSP2,SENP2,F2RL1,TSC1,DUSP16,ARHGAP42,DDIT4,PER1,CLU,PIBF1,HSPH1,SOCS3,NPLOC4,CAV1,PLAUR,RIOK3,CREB3,ATF3,ARHGAP12,EPHA2,GPATCH3,DUSP10,DYRK3,RASAL2,EFNA1,MCL1,EIF3A,DUSP5,PTPN1,DLG5,ZC3H12A,KLF4,OTUD3,SPRY2,SYVN1,ERRFI1,FLRT3,OPTN,XDH,GPS2,TAF9,RCAN1,SEC14L1,STAMBP,NFE…
GO:0010605	negative regulation of macromolecule metabolic process	313	2558	0.13	4.35e-06	9606.ENSP00000014914,9606.ENSP00000157600,9606.ENSP00000158771,9606.ENSP00000164227,9606.ENSP00000185150,9606.ENSP00000200453,9606.ENSP00000209728,9606.ENSP00000212015,9606.ENSP00000215631,9606.ENSP00000216037,9606.ENSP00000221452,9606.ENSP00000222329,9606.ENSP00000223095,9606.ENSP00000225688,9606.ENSP00000226574,9606.ENSP00000228872,9606.ENSP00000229416,9606.ENSP00000230990,9606.ENSP00000234198,…	GPRC5A,LMCD1,DERL2,BCL3,ERLEC1,PPP1R15A,CDC6,SIRT1,GADD45B,XBP1,RELB,ERF,SERPINE1,RASD1,NFKB1,CDKN1B,GCLC,HBEGF,DLX2,MSH6,RGS2,DUSP1,EGR1,BHLHE41,SNAI1,EREG,IRF1,FOSB,LIF,DLL4,FXR2,RAF1,JUND,CEP85,SESN2,RARA,THAP1,DNAJB1,RRP8,PER2,H3F3B,EIF2S1,MBD2,BHLHE40,TBX3,BACH2,AKIRIN2,HUS1,SDCBP,USP2,THBS1,TRIM37,N4BP1,ACIN1,EPC1,BIRC3,MXD1,ASB1,LEF1,SRF,CREM,BTAF1,JDP2,POLR2D,PELO,TNFRSF10B,CDKN2B,CCRN4L,…
GO:0010942	positive regulation of cell death	107	663	0.25	4.4e-06	9606.ENSP00000056217,9606.ENSP00000179259,9606.ENSP00000202556,9606.ENSP00000212015,9606.ENSP00000215631,9606.ENSP00000216037,9606.ENSP00000216117,9606.ENSP00000216373,9606.ENSP00000220751,9606.ENSP00000225174,9606.ENSP00000228872,9606.ENSP00000239223,9606.ENSP00000239938,9606.ENSP00000240874,9606.ENSP00000246229,9606.ENSP00000250457,9606.ENSP00000256015,9606.ENSP00000256383,9606.ENSP00000259808,…	ARHGEF5,C12orf5,PPP1R13B,SIRT1,GADD45B,XBP1,HMOX1,SOS2,RIPK2,PPIF,CDKN1B,DUSP1,EGR1,KALRN,PLAGL2,EGLN3,BTG1,EIF2S1,RIPK1,THBS1,BCL2L10,ACIN1,SLC9A1,MUL1,RAPGEF2,GAL,SIK1,RHOB,TNFRSF10B,FBXW7,FLCN,PPARG,HMGCR,FADD,IL12A,FOS,YWHAG,EIF2AK3,DDIT4,ZNF622,FOSL1,CLU,SSH1,STK17A,DCUN1D3,PMAIP1,TNFRSF12A,ALDH1A3,SMAD3,CAV1,PLAUR,SFN,ATF3,NET1,SFPQ,VCP,AKAP13,OSGIN1,CTGF,PEA15,MCL1,BCL10,GADD45A,JUN,ANKRD1…
GO:0065009	regulation of molecular function	390	3322	0.11	4.71e-06	9606.ENSP00000013125,9606.ENSP00000014914,9606.ENSP00000033079,9606.ENSP00000056217,9606.ENSP00000164227,9606.ENSP00000171111,9606.ENSP00000179259,9606.ENSP00000200453,9606.ENSP00000209728,9606.ENSP00000212015,9606.ENSP00000215631,9606.ENSP00000216117,9606.ENSP00000216373,9606.ENSP00000216489,9606.ENSP00000216797,9606.ENSP00000218516,9606.ENSP00000220751,9606.ENSP00000221086,9606.ENSP00000222553,…	MAP4K5,GPRC5A,FAM13B,ARHGEF5,BCL3,KEAP1,C12orf5,PPP1R15A,CDC6,SIRT1,GADD45B,HMOX1,SOS2,ALKBH1,NFKBIA,GLA,RIPK2,MTMR9,NAMPT,STX1A,SERPINE1,PPIF,NFKB1,CSRNP2,CYP27B1,CDKN1B,GUCA1B,HBEGF,MSH6,RGS2,DUSP1,EGR1,KALRN,MPHOSPH10,EREG,TNFSF9,WNK4,TICAM1,LIF,EGLN3,RAF1,GDF15,CEP85,SESN2,ZCCHC9,RARA,DNAJB1,PER2,JAG1,EIF2S1,ELP3,MBD2,IRAK2,BHLHE40,AKIRIN2,RIPK1,DCUN1D5,THBS1,BCL2L10,ARHGAP29,PREB,CCND2,FAF2,…
GO:0002831	regulation of response to biotic stimulus	77	426	0.3	6.59e-06	9606.ENSP00000179259,9606.ENSP00000216797,9606.ENSP00000220751,9606.ENSP00000221452,9606.ENSP00000226574,9606.ENSP00000229332,9606.ENSP00000244869,9606.ENSP00000245414,9606.ENSP00000248244,9606.ENSP00000251849,9606.ENSP00000252229,9606.ENSP00000256458,9606.ENSP00000257604,9606.ENSP00000259808,9606.ENSP00000262039,9606.ENSP00000262510,9606.ENSP00000263202,9606.ENSP00000263464,9606.ENSP00000264198,…	C12orf5,NFKBIA,RIPK2,RELB,NFKB1,CLEC4A,EREG,IRF1,TICAM1,RAF1,MICB,IRAK2,TRAFD1,RIPK1,PIK3C3,NLRC5,UFD1L,BIRC3,MUL1,PAK1,PPARG,IFNGR2,STAT5B,F2RL1,HSP90B1,CRK,FADD,IL12A,PRKCE,TRIB1,MALT1,IFNLR1,SOCS3,NPLOC4,POLR3C,CAV1,RIOK3,CREB3,PSPC1,TRIM38,SFPQ,ANKRD17,PELI1,GPATCH3,DUSP10,PRDM1,CHUK,BCL10,PTPN1,ZC3H12A,PTAFR,HSPA1B,HLA-E,OPTN,DDX58,TRIM5,SERPINB9,GPS2,CD274,RSAD2,SEC14L1,AP1G1,POLR3D,RELA,TL…
GO:0035556	intracellular signal transduction	203	1528	0.17	8.67e-06	9606.ENSP00000013125,9606.ENSP00000056217,9606.ENSP00000164227,9606.ENSP00000200453,9606.ENSP00000202556,9606.ENSP00000212015,9606.ENSP00000216037,9606.ENSP00000216085,9606.ENSP00000216117,9606.ENSP00000216373,9606.ENSP00000216797,9606.ENSP00000220507,9606.ENSP00000220751,9606.ENSP00000221452,9606.ENSP00000224140,9606.ENSP00000225688,9606.ENSP00000226574,9606.ENSP00000228872,9606.ENSP00000230990,…	MAP4K5,ARHGEF5,BCL3,PPP1R15A,PPP1R13B,SIRT1,XBP1,RHBDD3,HMOX1,SOS2,NFKBIA,RHOV,RIPK2,RELB,SETX,RASD1,NFKB1,CDKN1B,HBEGF,MSH6,DUSP1,KALRN,EREG,WNK4,TICAM1,LIF,RAF1,SESN2,RRP8,IRAK2,RIPK1,SDCBP,BCL2L10,ARHGAP29,MAPK6,SPAG9,PIK3C3,WSB1,MAP3K8,BIRC3,ARID3A,MAP4K3,SLC9A1,MUL1,ALS2,PIKFYVE,RASGEF1B,RAPGEF2,ASB1,MAP3K13,NPR3,GAL,MAPKAP1,RHOF,SIK1,RHOB,PLK2,TNFRSF10B,PAK1,PPP4C,FER,TJP1,FLCN,PRKAG2,BRAF,…
GO:0060548	negative regulation of cell death	139	953	0.21	1.08e-05	9606.ENSP00000164227,9606.ENSP00000179259,9606.ENSP00000198767,9606.ENSP00000209884,9606.ENSP00000212015,9606.ENSP00000216037,9606.ENSP00000216117,9606.ENSP00000216489,9606.ENSP00000216797,9606.ENSP00000217402,9606.ENSP00000220751,9606.ENSP00000223095,9606.ENSP00000224140,9606.ENSP00000225174,9606.ENSP00000226574,9606.ENSP00000227322,9606.ENSP00000228872,9606.ENSP00000229416,9606.ENSP00000231668,…	BCL3,C12orf5,RRN3,KLHL20,SIRT1,XBP1,HMOX1,ALKBH1,NFKBIA,CHMP4B,RIPK2,SERPINE1,SETX,PPIF,NFKB1,ZPR1,CDKN1B,GCLC,BNIP1,DUSP1,SNAI1,RAF1,RARA,TBX3,RIPK1,IER3,THBS1,BCL2L10,CCND2,ADNP2,C19orf10,IL1A,BIRC3,ACVR1,SLC9A1,ICAM1,GOLPH3,LEF1,NRP1,NPC1,PLK2,TNFRSF10B,SLC25A4,SH3RF1,HMGCR,BRAF,BTG2,STAT5B,ITGA5,REL,MITF,ANXA5,TSC1,HSP90B1,FADD,CEBPB,PDE12,CLCF1,TNFRSF10D,CFLAR,DAB2,CLU,EGR3,HSPH1,MALT1,SIAH2…
GO:0009894	regulation of catabolic process	126	840	0.22	1.1e-05	9606.ENSP00000157812,9606.ENSP00000158771,9606.ENSP00000171111,9606.ENSP00000179259,9606.ENSP00000185150,9606.ENSP00000212015,9606.ENSP00000216037,9606.ENSP00000216085,9606.ENSP00000216117,9606.ENSP00000217402,9606.ENSP00000220751,9606.ENSP00000221086,9606.ENSP00000228872,9606.ENSP00000229416,9606.ENSP00000234111,9606.ENSP00000248244,9606.ENSP00000253063,9606.ENSP00000258770,9606.ENSP00000260130,…	PSMC4,DERL2,KEAP1,C12orf5,ERLEC1,SIRT1,XBP1,RHBDD3,HMOX1,CHMP4B,RIPK2,MTMR9,CDKN1B,GCLC,ODC1,TICAM1,SESN2,TBRG4,SDCBP,N4BP1,MUL1,PIKFYVE,PSMD3,CRTC3,C18orf8,NPC1,RAB5A,PLK2,CCRN4L,FBXW7,FLCN,NSMCE2,PRKAG2,BTG2,STX5,KIAA0226,TSC1,RNF139,SF3B3,PRKCE,DDIT4,PPP1R3B,PDE12,TRIB1,DAB2,ZFAND2A,CLU,TLK2,RCHY1,YOD1,RAB12,DHX34,SMAD3,CAV1,RNF41,NRD1,WAC,UVRAG,ARIH2,MYLIP,ARNT,VCP,NUP214,SUPV3L1,MTCL1,DDA1,S…
GO:0031327	negative regulation of cellular biosynthetic process	197	1479	0.17	1.11e-05	9606.ENSP00000157600,9606.ENSP00000164227,9606.ENSP00000179259,9606.ENSP00000209728,9606.ENSP00000212015,9606.ENSP00000216037,9606.ENSP00000218516,9606.ENSP00000221452,9606.ENSP00000222329,9606.ENSP00000225688,9606.ENSP00000226574,9606.ENSP00000228606,9606.ENSP00000228872,9606.ENSP00000229416,9606.ENSP00000230990,9606.ENSP00000234198,9606.ENSP00000235382,9606.ENSP00000239223,9606.ENSP00000239938,…	LMCD1,BCL3,C12orf5,CDC6,SIRT1,XBP1,GLA,RELB,ERF,RASD1,NFKB1,CYP27B1,CDKN1B,GCLC,HBEGF,DLX2,RGS2,DUSP1,EGR1,BHLHE41,ORMDL2,SNAI1,EREG,IRF1,INSIG2,FOSB,DLL4,FXR2,JUND,SESN2,RARA,THAP1,DNAJB1,RRP8,PER2,H3F3B,EIF2S1,MBD2,BHLHE40,TBX3,BACH2,AKIRIN2,HUS1,USP2,TRIM37,EPC1,RAPGEF2,MXD1,ASB1,LEF1,SRF,CREM,BTAF1,JDP2,SIK1,FBXW7,NIPBL,FLCN,PPARG,BTG2,FGF19,ZNF281,REL,MITF,NFIL3,TSC1,RUNX1,JUNB,LRP8,RNF139,C…
GO:0043549	regulation of kinase activity	127	849	0.22	1.11e-05	9606.ENSP00000013125,9606.ENSP00000014914,9606.ENSP00000056217,9606.ENSP00000179259,9606.ENSP00000209728,9606.ENSP00000212015,9606.ENSP00000215631,9606.ENSP00000220751,9606.ENSP00000228872,9606.ENSP00000235382,9606.ENSP00000239223,9606.ENSP00000239938,9606.ENSP00000244869,9606.ENSP00000251849,9606.ENSP00000252809,9606.ENSP00000252992,9606.ENSP00000253063,9606.ENSP00000256398,9606.ENSP00000256458,…	MAP4K5,GPRC5A,ARHGEF5,C12orf5,CDC6,SIRT1,GADD45B,RIPK2,CDKN1B,RGS2,DUSP1,EGR1,EREG,RAF1,GDF15,CEP85,SESN2,ELP3,IRAK2,RIPK1,THBS1,CCND2,SPAG9,NLRC5,MAP3K8,MAP4K3,CCNT2,MUL1,ALS2,RAPGEF2,MAP3K13,MAPKAP1,GTF2H1,TNFRSF10B,CDKN2B,NRBF2,PAK1,FBXW7,UBASH3B,PRKAG2,HMGCR,BRAF,DUSP2,TGFA,CCNL1,KIAA0226,TSC1,DUSP16,CRK,MIDN,LRP8,CDC25A,ADORA2B,IBTK,YWHAG,ADAM17,ZNF622,TRIB1,CLU,DVL3,PIBF1,HSPH1,RAP2B,MALT1,…
GO:0009628	response to abiotic stimulus	150	1052	0.2	1.14e-05	9606.ENSP00000164227,9606.ENSP00000179259,9606.ENSP00000212015,9606.ENSP00000216117,9606.ENSP00000216267,9606.ENSP00000216797,9606.ENSP00000221452,9606.ENSP00000222812,9606.ENSP00000226574,9606.ENSP00000228872,9606.ENSP00000229416,9606.ENSP00000230361,9606.ENSP00000234420,9606.ENSP00000239223,9606.ENSP00000239938,9606.ENSP00000240874,9606.ENSP00000245414,9606.ENSP00000245919,9606.ENSP00000250457,…	BCL3,C12orf5,SIRT1,HMOX1,BRD1,NFKBIA,RELB,STX1A,NFKB1,CDKN1B,GCLC,GUCA1B,MSH6,DUSP1,EGR1,KALRN,IRF1,FOSB,EGLN3,RAF1,MICB,JUND,EIF2S1,MBD2,BHLHE40,RAB11FIP5,HUS1,USP2,THBS1,CCND2,N4BP1,IL1A,MAP4K3,SLC9A1,ICAM1,SRF,EIF2B2,SIK1,RHOB,POLR2D,TNFRSF10B,PAK1,FBXW7,NIPBL,CA2,PPARG,HMGCR,BTG2,TMEM199,AQP3,TSC1,HSP90B1,TRPV3,FADD,IL12A,JUNB,CDC25A,PRKCE,FOS,PPM1D,VASN,EIF2AK3,TBL2,DDIT4,ADAM17,FOSL1,B4GALT…
GO:0001932	regulation of protein phosphorylation	185	1370	0.18	1.18e-05	9606.ENSP00000013125,9606.ENSP00000014914,9606.ENSP00000056217,9606.ENSP00000164024,9606.ENSP00000209728,9606.ENSP00000212015,9606.ENSP00000215631,9606.ENSP00000216037,9606.ENSP00000220325,9606.ENSP00000220751,9606.ENSP00000228872,9606.ENSP00000230990,9606.ENSP00000235382,9606.ENSP00000239223,9606.ENSP00000239938,9606.ENSP00000244869,9606.ENSP00000249075,9606.ENSP00000251849,9606.ENSP00000252809,…	MAP4K5,GPRC5A,ARHGEF5,CELSR3,CDC6,SIRT1,GADD45B,XBP1,EHD4,RIPK2,CDKN1B,HBEGF,RGS2,DUSP1,EGR1,EREG,LIF,RAF1,GDF15,CEP85,SESN2,ELP3,IRAK2,HUS1,RIPK1,SDCBP,THBS1,CCND2,SEMA7A,SPAG9,PRDX1,C19orf10,MAP3K8,BRD4,ACVR1,MAP4K3,CCNT2,MUL1,ALS2,RAPGEF2,IL11,DNAJC27,ICAM1,MAP3K13,NRP1,MAPKAP1,GTF2H1,GAREM,AKAP8,TNFRSF10B,CDKN2B,PAK1,FER,FBXW7,PTPRR,UBASH3B,SH3RF1,FLCN,PRKAG2,HMGCR,BRAF,DUSP2,ITGA5,FGF19,TGFA…
GO:0006396	RNA processing	124	825	0.22	1.21e-05	9606.ENSP00000170564,9606.ENSP00000199320,9606.ENSP00000212015,9606.ENSP00000216038,9606.ENSP00000216252,9606.ENSP00000216489,9606.ENSP00000217109,9606.ENSP00000224140,9606.ENSP00000227322,9606.ENSP00000230340,9606.ENSP00000244230,9606.ENSP00000251636,9606.ENSP00000254605,9606.ENSP00000256398,9606.ENSP00000257181,9606.ENSP00000258770,9606.ENSP00000261708,9606.ENSP00000262710,9606.ENSP00000265963,…	GPATCH1,DIMT1,SIRT1,RTCB,PHF5A,ALKBH1,CSTF1,SETX,ZPR1,BYSL,MPHOSPH10,DHX29,RRP8,ELP3,PRPF38A,TBRG4,UTP6,ACIN1,GTF2H1,MBNL2,TXNL4B,SNRPG,POLR2D,CDKAL1,CCRN4L,RIOK2,U2AFBP,CCNL1,SNIP1,UTP15,TRA2A,RP9,KIAA1429,NOL6,TRMT10B,PCF11,TSR1,SF3B3,DDX19A,ISG20,WDR3,UTP23,PDE12,INTS6,TRMT10C,WDR75,PRMT9,PRPF3,RBBP6,SUPT6H,PRMT5,RRS1,RPUSD2,ISG20L2,AKAP17A,KARS,CIRH1A,DHX34,SMAD3,YTHDC1,RIOK3,PSPC1,CPSF7,PRPF…
GO:0009890	negative regulation of biosynthetic process	199	1501	0.17	1.25e-05	9606.ENSP00000157600,9606.ENSP00000164227,9606.ENSP00000179259,9606.ENSP00000209728,9606.ENSP00000212015,9606.ENSP00000216037,9606.ENSP00000218516,9606.ENSP00000221452,9606.ENSP00000222329,9606.ENSP00000225688,9606.ENSP00000226574,9606.ENSP00000228606,9606.ENSP00000228872,9606.ENSP00000229416,9606.ENSP00000230990,9606.ENSP00000234198,9606.ENSP00000235382,9606.ENSP00000239223,9606.ENSP00000239938,…	LMCD1,BCL3,C12orf5,CDC6,SIRT1,XBP1,GLA,RELB,ERF,RASD1,NFKB1,CYP27B1,CDKN1B,GCLC,HBEGF,DLX2,RGS2,DUSP1,EGR1,BHLHE41,ORMDL2,SNAI1,EREG,IRF1,INSIG2,FOSB,DLL4,FXR2,JUND,SESN2,RARA,THAP1,DNAJB1,RRP8,PER2,H3F3B,EIF2S1,MBD2,BHLHE40,TBX3,BACH2,AKIRIN2,HUS1,USP2,TRIM37,EPC1,RAPGEF2,MXD1,ASB1,LEF1,SRF,CREM,BTAF1,JDP2,SIK1,FBXW7,NIPBL,FLCN,PPARG,BTG2,FGF19,ZNF281,REL,MITF,NFIL3,TSC1,RUNX1,JUNB,LRP8,RNF139,C…
GO:0070887	cellular response to chemical stimulus	321	2672	0.12	1.29e-05	9606.ENSP00000056217,9606.ENSP00000064780,9606.ENSP00000158771,9606.ENSP00000166139,9606.ENSP00000171111,9606.ENSP00000179259,9606.ENSP00000209728,9606.ENSP00000212015,9606.ENSP00000215904,9606.ENSP00000216037,9606.ENSP00000216117,9606.ENSP00000216797,9606.ENSP00000220325,9606.ENSP00000220659,9606.ENSP00000220751,9606.ENSP00000221130,9606.ENSP00000222803,9606.ENSP00000222812,9606.ENSP00000222982,…	ARHGEF5,RELT,DERL2,FSTL3,KEAP1,C12orf5,CDC6,SIRT1,PDXP,XBP1,HMOX1,NFKBIA,EHD4,BRF2,RIPK2,GSR,FKBP14,STX1A,CYP3A5,SERPINE1,SETX,PPIF,NFKB1,ZPR1,IL10RA,CDKN1B,GCLC,HBEGF,UMPS,DUSP1,EGR1,EGR2,EREG,IRF1,TNFSF9,FOSB,TICAM1,SDF2L1,LIF,DNAJB9,DLL4,EGLN3,RAF1,MED17,GDF15,JUND,NUMBL,SESN2,AOC2,RARA,KDM6B,EIF2S1,MBD2,IRAK2,OASL,RAB11FIP5,RIPK1,THBS1,PREB,MAPK6,WIPI1,ADNP2,PRDX1,C19orf10,MAP3K8,UFD1L,IL1A,B…
GO:0071496	cellular response to external stimulus	60	305	0.34	1.35e-05	9606.ENSP00000212015,9606.ENSP00000215904,9606.ENSP00000216037,9606.ENSP00000216117,9606.ENSP00000226574,9606.ENSP00000229416,9606.ENSP00000245414,9606.ENSP00000253063,9606.ENSP00000254605,9606.ENSP00000256383,9606.ENSP00000262039,9606.ENSP00000263980,9606.ENSP00000264832,9606.ENSP00000265354,9606.ENSP00000266458,9606.ENSP00000276431,9606.ENSP00000276925,9606.ENSP00000287820,9606.ENSP00000297991,…	SIRT1,PDXP,XBP1,HMOX1,NFKB1,GCLC,IRF1,SESN2,RRP8,EIF2S1,PIK3C3,SLC9A1,ICAM1,SRF,GABARAPL1,TNFRSF10B,CDKN2B,PPARG,AQP3,TSC1,HSP90B1,FADD,FOXA3,ADORA2B,FOS,PPM1D,EIF2AK3,TBL2,FOSL1,SSH1,HSPA5,PMAIP1,UPP1,CAV1,MIOS,ATF3,NR4A2,P2RX4,NUAK2,GLRX2,BAG3,BCL10,GADD45A,JUN,ANKRD1,RRAGC,ZC3H12A,PIM1,BAK1,HABP4,NFE2L2,MTMR3,CDKN1A,ATP2B1,CADPS2,MAP2K4,FNIP1,ZFYVE1,BHLHA15,MAP3K14
GO:0001817	regulation of cytokine production	99	615	0.25	1.36e-05	9606.ENSP00000164227,9606.ENSP00000216037,9606.ENSP00000216117,9606.ENSP00000220751,9606.ENSP00000221452,9606.ENSP00000223095,9606.ENSP00000226574,9606.ENSP00000229332,9606.ENSP00000232496,9606.ENSP00000239882,9606.ENSP00000239938,9606.ENSP00000244869,9606.ENSP00000245414,9606.ENSP00000248244,9606.ENSP00000254066,9606.ENSP00000257787,9606.ENSP00000259808,9606.ENSP00000260356,9606.ENSP00000261918,…	BCL3,XBP1,HMOX1,RIPK2,RELB,SERPINE1,NFKB1,CLEC4A,TUSC2,ELF1,EGR1,EREG,IRF1,TICAM1,RARA,AKIRIN2,RIPK1,THBS1,SEMA7A,NLRC5,UFD1L,IL1A,BIRC3,MUL1,ASB1,LEF1,AKAP8,STAT5B,REL,F2RL1,RUNX1,FADD,IL12A,ADORA2B,CEBPB,EIF2AK3,ADAM17,HEG1,PER1,CLU,PIBF1,MALT1,KARS,NPLOC4,PDE4B,SMAD3,POLR3C,RIOK3,MAP2K3,BTN2A2,TRIM38,ARNT,ANKRD17,PELI1,GPATCH3,F11R,IL6R,NFKB2,CHUK,BCL10,POLR3A,ZC3H12A,PTAFR,KLF4,HSPA1B,HLA-E,E…
GO:0045088	regulation of innate immune response	67	361	0.31	1.74e-05	9606.ENSP00000216797,9606.ENSP00000220751,9606.ENSP00000221452,9606.ENSP00000226574,9606.ENSP00000229332,9606.ENSP00000244869,9606.ENSP00000245414,9606.ENSP00000248244,9606.ENSP00000251849,9606.ENSP00000256458,9606.ENSP00000257604,9606.ENSP00000259808,9606.ENSP00000262039,9606.ENSP00000262510,9606.ENSP00000263202,9606.ENSP00000263464,9606.ENSP00000264198,9606.ENSP00000278568,9606.ENSP00000287820,…	NFKBIA,RIPK2,RELB,NFKB1,CLEC4A,EREG,IRF1,TICAM1,RAF1,IRAK2,TRAFD1,RIPK1,PIK3C3,NLRC5,UFD1L,BIRC3,MUL1,PAK1,PPARG,IFNGR2,STAT5B,F2RL1,HSP90B1,CRK,FADD,IL12A,PRKCE,MALT1,SOCS3,NPLOC4,POLR3C,CAV1,RIOK3,PSPC1,SFPQ,ANKRD17,PELI1,GPATCH3,DUSP10,CHUK,BCL10,PTPN1,PTAFR,HSPA1B,HLA-E,DDX58,TRIM5,SERPINB9,GPS2,RSAD2,SEC14L1,AP1G1,POLR3D,RELA,TLR6,CYLD,PVR,MICA,MUC4,TRAF6,UBC,TRAF3,BIRC2,RPS6KA5,ITCH,TNFAIP3…
GO:0071900	regulation of protein serine/threonine kinase activity	83	488	0.28	1.82e-05	9606.ENSP00000013125,9606.ENSP00000056217,9606.ENSP00000209728,9606.ENSP00000212015,9606.ENSP00000215631,9606.ENSP00000220751,9606.ENSP00000228872,9606.ENSP00000235382,9606.ENSP00000239223,9606.ENSP00000251849,9606.ENSP00000252809,9606.ENSP00000253063,9606.ENSP00000256458,9606.ENSP00000259808,9606.ENSP00000260356,9606.ENSP00000261254,9606.ENSP00000262013,9606.ENSP00000263056,9606.ENSP00000263881,…	MAP4K5,ARHGEF5,CDC6,SIRT1,GADD45B,RIPK2,CDKN1B,RGS2,DUSP1,RAF1,GDF15,SESN2,IRAK2,RIPK1,THBS1,CCND2,SPAG9,MAP3K8,MAP4K3,CCNT2,MUL1,ALS2,RAPGEF2,MAP3K13,GTF2H1,CDKN2B,PAK1,PRKAG2,HMGCR,BRAF,DUSP2,TGFA,CCNL1,DUSP16,CRK,CDC25A,ADORA2B,YWHAG,ADAM17,TRIB1,DVL3,KARS,PDGFB,SPDYA,CAV1,SFN,CCNYL1,MAP2K3,PDGFA,UVRAG,SERTAD1,AKAP13,DUSP10,PROX1,PEA15,DUSP5,AVPI1,GADD45A,PTPN1,PIM1,DKK1,DAXX,SPRY2,BMP2,RGCC,E…
GO:0000122	negative regulation of transcription by RNA polymerase II	121	809	0.22	2.03e-05	9606.ENSP00000157600,9606.ENSP00000212015,9606.ENSP00000216037,9606.ENSP00000221452,9606.ENSP00000222329,9606.ENSP00000226574,9606.ENSP00000234198,9606.ENSP00000239938,9606.ENSP00000242728,9606.ENSP00000244050,9606.ENSP00000245919,9606.ENSP00000249749,9606.ENSP00000252818,9606.ENSP00000254066,9606.ENSP00000254250,9606.ENSP00000254322,9606.ENSP00000254657,9606.ENSP00000256429,9606.ENSP00000256495,…	LMCD1,SIRT1,XBP1,RELB,ERF,NFKB1,DLX2,EGR1,BHLHE41,SNAI1,FOSB,DLL4,JUND,RARA,THAP1,DNAJB1,PER2,MBD2,BHLHE40,TBX3,BACH2,AKIRIN2,USP2,TRIM37,EPC1,MXD1,LEF1,SRF,CREM,JDP2,NIPBL,FLCN,PPARG,BTG2,ZNF281,REL,MITF,NFIL3,RUNX1,JUNB,LRP8,CEBPB,ZBTB5,ZNF608,ZNF239,MEPCE,ZNF431,NR1D2,PER1,ZHX2,CALR,RNF168,PDGFB,SMAD3,ZNF354A,ZNF202,OVOL1,GZF1,CAV1,HIST1H1C,JARID2,ZNF189,MCPH1,ZNF136,ATF3,NR4A2,MAFK,ZNF140,NRA…
GO:0051128	regulation of cellular component organization	282	2306	0.13	2.06e-05	9606.ENSP00000056217,9606.ENSP00000157812,9606.ENSP00000158771,9606.ENSP00000179259,9606.ENSP00000198767,9606.ENSP00000200453,9606.ENSP00000202556,9606.ENSP00000209728,9606.ENSP00000212015,9606.ENSP00000215904,9606.ENSP00000216037,9606.ENSP00000217402,9606.ENSP00000220325,9606.ENSP00000220509,9606.ENSP00000222812,9606.ENSP00000223095,9606.ENSP00000224140,9606.ENSP00000225174,9606.ENSP00000227752,…	ARHGEF5,PSMC4,DERL2,C12orf5,RRN3,PPP1R15A,PPP1R13B,CDC6,SIRT1,PDXP,XBP1,CHMP4B,EHD4,VPS18,STX1A,SERPINE1,SETX,PPIF,IL10RA,CYP27B1,CDKN1B,HBEGF,RGS2,CAMSAP2,ATAD2B,DUSP1,KALRN,SNAI1,EREG,LIF,STRIP2,RAF1,GDF15,CEP85,SESN2,DNAJB1,H3F3B,ACTR3B,BTG1,SDCBP,THBS1,PREB,MAPK6,SEMA7A,ADNP2,TRIM37,IL1A,SLC9A1,LCAT,MUL1,SLAIN2,PIKFYVE,RAPGEF2,ICAM1,GOLPH3,LEF1,FSTL4,SRF,NRP1,GAL,GTF2H1,JDP2,AKAP8,RAB5A,DYNC1…
GO:1905897	regulation of response to endoplasmic reticulum stress	26	81	0.55	2.58e-05	9606.ENSP00000158771,9606.ENSP00000185150,9606.ENSP00000200453,9606.ENSP00000212015,9606.ENSP00000216037,9606.ENSP00000249356,9606.ENSP00000307235,9606.ENSP00000315130,9606.ENSP00000324173,9606.ENSP00000326119,9606.ENSP00000326813,9606.ENSP00000339191,9606.ENSP00000342136,9606.ENSP00000356156,9606.ENSP00000360683,9606.ENSP00000363591,9606.ENSP00000366395,9606.ENSP00000380252,9606.ENSP00000381282,…	DERL2,ERLEC1,PPP1R15A,SIRT1,XBP1,DNAJB9,EIF2AK3,CLU,HSPA5,PMAIP1,YOD1,CAV1,CREB3,PPP1R15B,PTPN1,BAK1,SYVN1,NFE2L2,VIMP,USP25,HERPUD1,NCK1,MANF,FICD,DDIT3,DNAJC3
GO:0043068	positive regulation of programmed cell death	97	610	0.25	2.82e-05	9606.ENSP00000056217,9606.ENSP00000179259,9606.ENSP00000202556,9606.ENSP00000212015,9606.ENSP00000215631,9606.ENSP00000216037,9606.ENSP00000216117,9606.ENSP00000216373,9606.ENSP00000220751,9606.ENSP00000225174,9606.ENSP00000239223,9606.ENSP00000240874,9606.ENSP00000246229,9606.ENSP00000250457,9606.ENSP00000256015,9606.ENSP00000256383,9606.ENSP00000259808,9606.ENSP00000260356,9606.ENSP00000260442,…	ARHGEF5,C12orf5,PPP1R13B,SIRT1,GADD45B,XBP1,HMOX1,SOS2,RIPK2,PPIF,DUSP1,KALRN,PLAGL2,EGLN3,BTG1,EIF2S1,RIPK1,THBS1,BCL2L10,ACIN1,SLC9A1,MUL1,RAPGEF2,GAL,SIK1,RHOB,TNFRSF10B,FBXW7,FLCN,PPARG,HMGCR,FADD,IL12A,YWHAG,EIF2AK3,ZNF622,FOSL1,CLU,STK17A,DCUN1D3,PMAIP1,TNFRSF12A,ALDH1A3,SMAD3,CAV1,PLAUR,SFN,ATF3,NET1,SFPQ,VCP,AKAP13,OSGIN1,CTGF,PEA15,MCL1,BCL10,GADD45A,JUN,ANKRD1,ZC3H12A,MTCH1,BAK1,TRIM39,…
GO:0043065	positive regulation of apoptotic process	96	604	0.25	3.27e-05	9606.ENSP00000056217,9606.ENSP00000179259,9606.ENSP00000202556,9606.ENSP00000212015,9606.ENSP00000215631,9606.ENSP00000216037,9606.ENSP00000216117,9606.ENSP00000216373,9606.ENSP00000220751,9606.ENSP00000225174,9606.ENSP00000239223,9606.ENSP00000240874,9606.ENSP00000246229,9606.ENSP00000250457,9606.ENSP00000256015,9606.ENSP00000256383,9606.ENSP00000259808,9606.ENSP00000260356,9606.ENSP00000260442,…	ARHGEF5,C12orf5,PPP1R13B,SIRT1,GADD45B,XBP1,HMOX1,SOS2,RIPK2,PPIF,DUSP1,KALRN,PLAGL2,EGLN3,BTG1,EIF2S1,RIPK1,THBS1,BCL2L10,ACIN1,SLC9A1,MUL1,RAPGEF2,GAL,SIK1,RHOB,TNFRSF10B,FBXW7,FLCN,PPARG,HMGCR,FADD,IL12A,YWHAG,EIF2AK3,ZNF622,FOSL1,CLU,STK17A,DCUN1D3,PMAIP1,TNFRSF12A,ALDH1A3,SMAD3,CAV1,PLAUR,SFN,ATF3,NET1,SFPQ,VCP,AKAP13,OSGIN1,CTGF,PEA15,MCL1,BCL10,GADD45A,JUN,ANKRD1,ZC3H12A,MTCH1,BAK1,TRIM39,…
GO:0006915	apoptotic process	132	915	0.2	3.31e-05	9606.ENSP00000064780,9606.ENSP00000164227,9606.ENSP00000179259,9606.ENSP00000200453,9606.ENSP00000202556,9606.ENSP00000212015,9606.ENSP00000215631,9606.ENSP00000216037,9606.ENSP00000216117,9606.ENSP00000216797,9606.ENSP00000220751,9606.ENSP00000225174,9606.ENSP00000226574,9606.ENSP00000227322,9606.ENSP00000228515,9606.ENSP00000229416,9606.ENSP00000231668,9606.ENSP00000234420,9606.ENSP00000238788,…	RELT,BCL3,C12orf5,PPP1R15A,PPP1R13B,SIRT1,GADD45B,XBP1,HMOX1,NFKBIA,RIPK2,PPIF,NFKB1,ZPR1,CSRNP2,GCLC,BNIP1,MSH6,TMEM214,IRF1,TNFSF9,PLAGL2,TICAM1,EGLN3,RAF1,RRP8,RIPK1,IER3,BCL2L10,ACIN1,C19orf10,IL1A,BIRC3,MUL1,LEF1,PHLDA1,MEF2D,RHOB,CSRNP1,EAF2,TNFRSF10B,PAK1,SLC25A4,SH3RF1,FADD,IL12A,CEBPB,PRKCE,DDIT4,ZNF622,TNFRSF10D,CFLAR,DAB2,CLU,STK17A,PHLDA2,SIAH2,HSPA5,PMAIP1,TNFRSF12A,AEN,SMAD3,SRA1,CA…
GO:0051338	regulation of transferase activity	137	964	0.2	4.17e-05	9606.ENSP00000013125,9606.ENSP00000014914,9606.ENSP00000056217,9606.ENSP00000179259,9606.ENSP00000209728,9606.ENSP00000212015,9606.ENSP00000215631,9606.ENSP00000220751,9606.ENSP00000228872,9606.ENSP00000235382,9606.ENSP00000239223,9606.ENSP00000239938,9606.ENSP00000244869,9606.ENSP00000251849,9606.ENSP00000252809,9606.ENSP00000252992,9606.ENSP00000253063,9606.ENSP00000256398,9606.ENSP00000256458,…	MAP4K5,GPRC5A,ARHGEF5,C12orf5,CDC6,SIRT1,GADD45B,RIPK2,CDKN1B,RGS2,DUSP1,EGR1,EREG,RAF1,GDF15,CEP85,SESN2,ELP3,IRAK2,RIPK1,DCUN1D5,THBS1,CCND2,SPAG9,NLRC5,MAP3K8,MAP4K3,CCNT2,MUL1,ALS2,RAPGEF2,MAP3K13,ARRDC3,MAPKAP1,GTF2H1,ARRDC4,FEM1A,TNFRSF10B,CDKN2B,NRBF2,PAK1,FBXW7,UBASH3B,PPARG,PRKAG2,HMGCR,BRAF,DUSP2,TGFA,CCNL1,KIAA0226,TSC1,DUSP16,CRK,MIDN,LRP8,CDC25A,ADORA2B,IBTK,YWHAG,ADAM17,ZNF622,TRIB1…
GO:0045859	regulation of protein kinase activity	117	788	0.22	4.19e-05	9606.ENSP00000013125,9606.ENSP00000014914,9606.ENSP00000056217,9606.ENSP00000209728,9606.ENSP00000212015,9606.ENSP00000215631,9606.ENSP00000220751,9606.ENSP00000228872,9606.ENSP00000235382,9606.ENSP00000239223,9606.ENSP00000239938,9606.ENSP00000244869,9606.ENSP00000251849,9606.ENSP00000252809,9606.ENSP00000252992,9606.ENSP00000253063,9606.ENSP00000256398,9606.ENSP00000256458,9606.ENSP00000259808,…	MAP4K5,GPRC5A,ARHGEF5,CDC6,SIRT1,GADD45B,RIPK2,CDKN1B,RGS2,DUSP1,EGR1,EREG,RAF1,GDF15,CEP85,SESN2,ELP3,IRAK2,RIPK1,THBS1,CCND2,SPAG9,MAP3K8,MAP4K3,CCNT2,MUL1,ALS2,RAPGEF2,MAP3K13,MAPKAP1,GTF2H1,TNFRSF10B,CDKN2B,PAK1,FBXW7,UBASH3B,PRKAG2,HMGCR,BRAF,DUSP2,TGFA,CCNL1,TSC1,DUSP16,CRK,LRP8,CDC25A,ADORA2B,IBTK,YWHAG,ADAM17,TRIB1,CLU,DVL3,PIBF1,HSPH1,RAP2B,MALT1,KARS,CSF1,SOCS3,PDGFB,SPDYA,CAV1,SFN,CCNY…
GO:0043069	negative regulation of programmed cell death	126	873	0.2	5.78e-05	9606.ENSP00000164227,9606.ENSP00000179259,9606.ENSP00000198767,9606.ENSP00000209884,9606.ENSP00000212015,9606.ENSP00000216037,9606.ENSP00000216117,9606.ENSP00000216489,9606.ENSP00000216797,9606.ENSP00000220751,9606.ENSP00000223095,9606.ENSP00000224140,9606.ENSP00000225174,9606.ENSP00000226574,9606.ENSP00000227322,9606.ENSP00000228872,9606.ENSP00000229416,9606.ENSP00000231668,9606.ENSP00000239223,…	BCL3,C12orf5,RRN3,KLHL20,SIRT1,XBP1,HMOX1,ALKBH1,NFKBIA,RIPK2,SERPINE1,SETX,PPIF,NFKB1,ZPR1,CDKN1B,GCLC,BNIP1,DUSP1,SNAI1,RAF1,RARA,TBX3,RIPK1,IER3,THBS1,BCL2L10,CCND2,C19orf10,IL1A,BIRC3,ACVR1,SLC9A1,ICAM1,GOLPH3,LEF1,NRP1,PLK2,TNFRSF10B,SLC25A4,SH3RF1,HMGCR,BRAF,BTG2,STAT5B,ITGA5,MITF,ANXA5,HSP90B1,FADD,CEBPB,CLCF1,TNFRSF10D,CFLAR,DAB2,CLU,EGR3,HSPH1,MALT1,SIAH2,HSPA5,SOCS3,SMAD3,ARHGAP10,CAV1,…
GO:0044093	positive regulation of molecular function	217	1713	0.15	6.17e-05	9606.ENSP00000013125,9606.ENSP00000033079,9606.ENSP00000056217,9606.ENSP00000179259,9606.ENSP00000200453,9606.ENSP00000209728,9606.ENSP00000212015,9606.ENSP00000215631,9606.ENSP00000220751,9606.ENSP00000221086,9606.ENSP00000226574,9606.ENSP00000228606,9606.ENSP00000228872,9606.ENSP00000230361,9606.ENSP00000234420,9606.ENSP00000235382,9606.ENSP00000239938,9606.ENSP00000240874,9606.ENSP00000244869,…	MAP4K5,FAM13B,ARHGEF5,C12orf5,PPP1R15A,CDC6,SIRT1,GADD45B,RIPK2,MTMR9,NFKB1,CYP27B1,CDKN1B,GUCA1B,MSH6,RGS2,EGR1,KALRN,EREG,TICAM1,EGLN3,RAF1,GDF15,RARA,DNAJB1,EIF2S1,MBD2,IRAK2,AKIRIN2,RIPK1,DCUN1D5,THBS1,BCL2L10,ARHGAP29,PREB,CCND2,SPAG9,TRIM37,MAP3K8,ARFGAP3,MAP4K3,SLC9A1,CCNT2,MUL1,ALS2,RASGEF1B,RAPGEF2,ICAM1,MAP3K13,NPR3,ARRDC3,SRF,NRP1,GAL,MAPKAP1,ARRDC4,CRTC3,PLK2,TNFRSF10B,PPRC1,PAK1,FER,…
GO:0031329	regulation of cellular catabolic process	111	743	0.22	6.17e-05	9606.ENSP00000157812,9606.ENSP00000158771,9606.ENSP00000171111,9606.ENSP00000179259,9606.ENSP00000185150,9606.ENSP00000212015,9606.ENSP00000216037,9606.ENSP00000216117,9606.ENSP00000217402,9606.ENSP00000220751,9606.ENSP00000221086,9606.ENSP00000229416,9606.ENSP00000248244,9606.ENSP00000253063,9606.ENSP00000258770,9606.ENSP00000260130,9606.ENSP00000262384,9606.ENSP00000264198,9606.ENSP00000264380,…	PSMC4,DERL2,KEAP1,C12orf5,ERLEC1,SIRT1,XBP1,HMOX1,CHMP4B,RIPK2,MTMR9,GCLC,TICAM1,SESN2,TBRG4,SDCBP,N4BP1,MUL1,PIKFYVE,C18orf8,NPC1,RAB5A,PLK2,CCRN4L,FBXW7,FLCN,NSMCE2,PRKAG2,BTG2,KIAA0226,TSC1,RNF139,DDIT4,PPP1R3B,PDE12,TRIB1,DAB2,ZFAND2A,CLU,TLK2,RCHY1,YOD1,RAB12,DHX34,CAV1,RNF41,NRD1,WAC,UVRAG,ARIH2,MYLIP,ARNT,VCP,NUP214,SUPV3L1,MTCL1,DDA1,SMURF1,LRIG2,EXOC8,EFNA1,MCL1,FAM46C,BTRC,PTPN1,LONRF3,…
GO:2000113	negative regulation of cellular macromolecule biosynthetic process	178	1348	0.17	6.51e-05	9606.ENSP00000157600,9606.ENSP00000164227,9606.ENSP00000209728,9606.ENSP00000212015,9606.ENSP00000216037,9606.ENSP00000221452,9606.ENSP00000222329,9606.ENSP00000225688,9606.ENSP00000226574,9606.ENSP00000228872,9606.ENSP00000229416,9606.ENSP00000230990,9606.ENSP00000234198,9606.ENSP00000235382,9606.ENSP00000239223,9606.ENSP00000239938,9606.ENSP00000242728,9606.ENSP00000244050,9606.ENSP00000244869,…	LMCD1,BCL3,CDC6,SIRT1,XBP1,RELB,ERF,RASD1,NFKB1,CDKN1B,GCLC,HBEGF,DLX2,RGS2,DUSP1,EGR1,BHLHE41,SNAI1,EREG,IRF1,FOSB,DLL4,FXR2,JUND,SESN2,RARA,THAP1,DNAJB1,RRP8,PER2,H3F3B,EIF2S1,MBD2,BHLHE40,TBX3,BACH2,AKIRIN2,HUS1,USP2,TRIM37,EPC1,MXD1,LEF1,SRF,CREM,BTAF1,JDP2,FBXW7,NIPBL,FLCN,PPARG,BTG2,ZNF281,REL,MITF,NFIL3,TSC1,RUNX1,JUNB,LRP8,RNF139,CEBPB,PPM1D,EIF2AK3,ZBTB5,ZNF608,ZNF239,MEPCE,ZNF431,NR1D2,…
GO:0043066	negative regulation of apoptotic process	124	859	0.2	6.82e-05	9606.ENSP00000164227,9606.ENSP00000198767,9606.ENSP00000209884,9606.ENSP00000212015,9606.ENSP00000216037,9606.ENSP00000216117,9606.ENSP00000216489,9606.ENSP00000216797,9606.ENSP00000220751,9606.ENSP00000223095,9606.ENSP00000224140,9606.ENSP00000225174,9606.ENSP00000226574,9606.ENSP00000227322,9606.ENSP00000228872,9606.ENSP00000229416,9606.ENSP00000231668,9606.ENSP00000239223,9606.ENSP00000244050,…	BCL3,RRN3,KLHL20,SIRT1,XBP1,HMOX1,ALKBH1,NFKBIA,RIPK2,SERPINE1,SETX,PPIF,NFKB1,ZPR1,CDKN1B,GCLC,BNIP1,DUSP1,SNAI1,RAF1,RARA,TBX3,RIPK1,IER3,THBS1,BCL2L10,CCND2,C19orf10,IL1A,BIRC3,ACVR1,SLC9A1,ICAM1,GOLPH3,LEF1,NRP1,PLK2,TNFRSF10B,SH3RF1,HMGCR,BRAF,BTG2,STAT5B,ITGA5,MITF,ANXA5,HSP90B1,FADD,CEBPB,CLCF1,TNFRSF10D,CFLAR,DAB2,CLU,EGR3,HSPH1,MALT1,SIAH2,HSPA5,SOCS3,SMAD3,ARHGAP10,CAV1,PLAUR,SFN,CREB3,…
GO:0071310	cellular response to organic substance	269	2219	0.13	7.14e-05	9606.ENSP00000064780,9606.ENSP00000158771,9606.ENSP00000171111,9606.ENSP00000209728,9606.ENSP00000212015,9606.ENSP00000215904,9606.ENSP00000216037,9606.ENSP00000216117,9606.ENSP00000216797,9606.ENSP00000220325,9606.ENSP00000220751,9606.ENSP00000222803,9606.ENSP00000222812,9606.ENSP00000223095,9606.ENSP00000224140,9606.ENSP00000226574,9606.ENSP00000227322,9606.ENSP00000227752,9606.ENSP00000228872,…	RELT,DERL2,KEAP1,CDC6,SIRT1,PDXP,XBP1,HMOX1,NFKBIA,EHD4,RIPK2,FKBP14,STX1A,SERPINE1,SETX,NFKB1,ZPR1,IL10RA,CDKN1B,GCLC,DUSP1,EGR1,EGR2,EREG,IRF1,TNFSF9,FOSB,TICAM1,SDF2L1,LIF,DNAJB9,DLL4,RAF1,MED17,GDF15,JUND,NUMBL,SESN2,RARA,EIF2S1,MBD2,IRAK2,OASL,RAB11FIP5,RIPK1,THBS1,PREB,MAPK6,WIPI1,ADNP2,C19orf10,MAP3K8,UFD1L,IL1A,BIRC3,ACVR1,SLC9A1,MUL1,RAPGEF2,IL11,PPAP2A,ICAM1,LEF1,SRF,NRP1,GAREM,NPC1,AKA…
GO:0051248	negative regulation of protein metabolic process	148	1075	0.18	7.14e-05	9606.ENSP00000014914,9606.ENSP00000158771,9606.ENSP00000164227,9606.ENSP00000185150,9606.ENSP00000200453,9606.ENSP00000212015,9606.ENSP00000215631,9606.ENSP00000216037,9606.ENSP00000223095,9606.ENSP00000226574,9606.ENSP00000228872,9606.ENSP00000229416,9606.ENSP00000230990,9606.ENSP00000235382,9606.ENSP00000239223,9606.ENSP00000249075,9606.ENSP00000250113,9606.ENSP00000251849,9606.ENSP00000252992,…	GPRC5A,DERL2,BCL3,ERLEC1,PPP1R15A,SIRT1,GADD45B,XBP1,SERPINE1,NFKB1,CDKN1B,GCLC,HBEGF,RGS2,DUSP1,LIF,FXR2,RAF1,CEP85,SESN2,RARA,PER2,EIF2S1,SDCBP,THBS1,N4BP1,BIRC3,ASB1,LEF1,TNFRSF10B,CDKN2B,PTPRR,UBASH3B,SH3RF1,FLCN,PRKAG2,HMGCR,DUSP2,BTG2,SENP2,F2RL1,TSC1,DUSP16,TERF2IP,RNF139,IBTK,SF3B3,PRKCE,YWHAG,EIF2AK3,DDIT4,BOD1,TNFRSF10D,TRIB1,CFLAR,PER1,CLU,TLK2,PIBF1,HSPH1,PINX1,SUPT6H,CALR,SIAH2,YOD1,…
GO:0043085	positive regulation of catalytic activity	181	1381	0.16	7.82e-05	9606.ENSP00000013125,9606.ENSP00000033079,9606.ENSP00000056217,9606.ENSP00000179259,9606.ENSP00000200453,9606.ENSP00000209728,9606.ENSP00000212015,9606.ENSP00000215631,9606.ENSP00000220751,9606.ENSP00000221086,9606.ENSP00000228606,9606.ENSP00000228872,9606.ENSP00000230361,9606.ENSP00000234420,9606.ENSP00000235382,9606.ENSP00000239938,9606.ENSP00000240874,9606.ENSP00000244869,9606.ENSP00000250457,…	MAP4K5,FAM13B,ARHGEF5,C12orf5,PPP1R15A,CDC6,SIRT1,GADD45B,RIPK2,MTMR9,CYP27B1,CDKN1B,GUCA1B,MSH6,RGS2,EGR1,KALRN,EREG,EGLN3,RAF1,GDF15,DNAJB1,IRAK2,AKIRIN2,RIPK1,DCUN1D5,THBS1,BCL2L10,ARHGAP29,PREB,CCND2,SPAG9,MAP3K8,ARFGAP3,MAP4K3,CCNT2,MUL1,ALS2,RASGEF1B,RAPGEF2,ICAM1,MAP3K13,NPR3,ARRDC3,NRP1,MAPKAP1,ARRDC4,TNFRSF10B,PAK1,FBXW7,PPARG,PRKAG2,BRAF,ARHGAP17,CDC42EP3,TGFA,CCNL1,PCOLCE2,F2RL1,TSC1,A…
GO:0032269	negative regulation of cellular protein metabolic process	141	1014	0.19	7.82e-05	9606.ENSP00000014914,9606.ENSP00000158771,9606.ENSP00000185150,9606.ENSP00000200453,9606.ENSP00000212015,9606.ENSP00000215631,9606.ENSP00000216037,9606.ENSP00000223095,9606.ENSP00000226574,9606.ENSP00000228872,9606.ENSP00000229416,9606.ENSP00000235382,9606.ENSP00000239223,9606.ENSP00000249075,9606.ENSP00000250113,9606.ENSP00000251849,9606.ENSP00000252992,9606.ENSP00000253063,9606.ENSP00000254066,…	GPRC5A,DERL2,ERLEC1,PPP1R15A,SIRT1,GADD45B,XBP1,SERPINE1,NFKB1,CDKN1B,GCLC,RGS2,DUSP1,LIF,FXR2,RAF1,CEP85,SESN2,RARA,PER2,EIF2S1,SDCBP,THBS1,N4BP1,BIRC3,LEF1,TNFRSF10B,CDKN2B,PTPRR,UBASH3B,SH3RF1,FLCN,PRKAG2,HMGCR,DUSP2,BTG2,SENP2,F2RL1,TSC1,DUSP16,TERF2IP,RNF139,IBTK,PRKCE,YWHAG,EIF2AK3,DDIT4,BOD1,TNFRSF10D,TRIB1,CFLAR,PER1,TLK2,PIBF1,HSPH1,PINX1,SUPT6H,CALR,SIAH2,YOD1,CLN8,SOCS3,CAV1,PLAUR,SFN,…
GO:0006511	ubiquitin-dependent protein catabolic process	77	461	0.27	7.83e-05	9606.ENSP00000157812,9606.ENSP00000158771,9606.ENSP00000185150,9606.ENSP00000209884,9606.ENSP00000212015,9606.ENSP00000216037,9606.ENSP00000219313,9606.ENSP00000237455,9606.ENSP00000242719,9606.ENSP00000247977,9606.ENSP00000249356,9606.ENSP00000252015,9606.ENSP00000256257,9606.ENSP00000259335,9606.ENSP00000260187,9606.ENSP00000261712,9606.ENSP00000261942,9606.ENSP00000263202,9606.ENSP00000264639,…	PSMC4,DERL2,ERLEC1,KLHL20,SIRT1,XBP1,PSMD7,RNF103,RNF11,FBXL12,DNAJB9,TRPC4AP,RNF122,KIAA0368,USP2,PSMD11,FAF2,UFD1L,PSMD3,BTBD11,FBXW7,USP12,UBAP1,HSP90B1,KCTD5,RNF139,RNF181,FBXO45,KCTD2,KLHL11,TOLLIP,RBBP6,VPS37A,RNF168,RCHY1,SIAH2,HSPA5,YOD1,NPLOC4,KLHL25,KCTD21,KCTD6,UBE2H,ARIH2,MYLIP,TRIM38,VCP,ZRANB1,TOPORS,SMURF1,BTRC,TP53INP2,UBR4,SYVN1,SQSTM1,USP49,USP8,NFE2L2,VIMP,USP25,NEDD4L,UBE2J2,A…
GO:0006984	ER-nucleus signaling pathway	16	34	0.72	7.83e-05	9606.ENSP00000216037,9606.ENSP00000245787,9606.ENSP00000256383,9606.ENSP00000299767,9606.ENSP00000306512,9606.ENSP00000307235,9606.ENSP00000320866,9606.ENSP00000324173,9606.ENSP00000344352,9606.ENSP00000344741,9606.ENSP00000356156,9606.ENSP00000380252,9606.ENSP00000381282,9606.ENSP00000409555,9606.ENSP00000440045,9606.ENSP00000448665	XBP1,INSIG2,EIF2S1,HSP90B1,CXCL8,EIF2AK3,CALR,HSPA5,ATF3,INSIG1,PPP1R15B,NFE2L2,VIMP,HERPUD1,ATP2A2,DDIT3
GO:0044257	cellular protein catabolic process	89	562	0.24	8.67e-05	9606.ENSP00000157812,9606.ENSP00000158771,9606.ENSP00000171111,9606.ENSP00000185150,9606.ENSP00000209884,9606.ENSP00000212015,9606.ENSP00000216037,9606.ENSP00000217402,9606.ENSP00000219313,9606.ENSP00000237455,9606.ENSP00000242719,9606.ENSP00000247977,9606.ENSP00000248958,9606.ENSP00000249356,9606.ENSP00000252015,9606.ENSP00000256257,9606.ENSP00000259335,9606.ENSP00000259808,9606.ENSP00000260187,…	PSMC4,DERL2,KEAP1,ERLEC1,KLHL20,SIRT1,XBP1,CHMP4B,PSMD7,RNF103,RNF11,FBXL12,SDF2L1,DNAJB9,TRPC4AP,RNF122,KIAA0368,RIPK1,USP2,PSMD11,FAF2,UFD1L,PSMD3,BTBD11,FBXW7,USP12,TMEM199,UBAP1,HSP90B1,KCTD5,RNF139,RNF181,FBXO45,KCTD2,KLHL11,TOLLIP,RBBP6,VPS37A,RNF168,RCHY1,SIAH2,HSPA5,PMAIP1,YOD1,NPLOC4,RAB12,KLHL25,KCTD21,RNF41,KCTD6,UBE2H,ARIH2,MYLIP,TRIM38,VCP,ZRANB1,TOPORS,SMURF1,BTRC,TP53INP2,UBR4,SYVN…
GO:0032446	protein modification by small protein conjugation	104	690	0.22	8.79e-05	9606.ENSP00000171111,9606.ENSP00000209884,9606.ENSP00000212015,9606.ENSP00000232766,9606.ENSP00000233630,9606.ENSP00000237281,9606.ENSP00000237455,9606.ENSP00000242480,9606.ENSP00000242719,9606.ENSP00000247977,9606.ENSP00000252015,9606.ENSP00000255764,9606.ENSP00000256257,9606.ENSP00000257749,9606.ENSP00000260247,9606.ENSP00000262294,9606.ENSP00000262394,9606.ENSP00000263464,9606.ENSP00000264198,…	KEAP1,KLHL20,SIRT1,KLHL18,PCGF1,FBXO30,RNF103,EGR2,RNF11,FBXL12,TRPC4AP,MED10,RNF122,BACH2,DCUN1D5,TRIM37,WSB1,BIRC3,MUL1,ASB1,ARRDC4,FEM1A,FEM1C,FBXW7,TRIM36,SH3RF1,NSMCE2,MED8,MED27,RNF25,SENP2,FBXO33,UNKL,RNF139,RNF181,FBXO45,RBBP6,MALT1,DCUN1D3,RNF168,RCHY1,RNF10,SIAH2,UBE2O,SPSB1,SOCS3,KLHL25,KCTD21,RNF41,WAC,KCTD6,UBE2H,ARIH2,MYLIP,TRIM38,VCP,PELI1,TOPORS,SMURF1,CTR9,PCGF6,BTRC,BCL10,TNKS2,…
GO:0009896	positive regulation of catabolic process	69	399	0.28	9.25e-05	9606.ENSP00000157812,9606.ENSP00000171111,9606.ENSP00000212015,9606.ENSP00000216037,9606.ENSP00000216085,9606.ENSP00000216117,9606.ENSP00000220751,9606.ENSP00000228872,9606.ENSP00000229416,9606.ENSP00000248244,9606.ENSP00000253063,9606.ENSP00000264198,9606.ENSP00000274289,9606.ENSP00000281708,9606.ENSP00000285071,9606.ENSP00000287437,9606.ENSP00000290551,9606.ENSP00000294179,9606.ENSP00000298552,…	PSMC4,KEAP1,SIRT1,XBP1,RHBDD3,HMOX1,RIPK2,CDKN1B,GCLC,TICAM1,SESN2,MUL1,PLK2,FBXW7,FLCN,NSMCE2,BTG2,STX5,TSC1,RNF139,PRKCE,TRIB1,DAB2,ZFAND2A,CLU,RCHY1,RAB12,CAV1,RNF41,NRD1,WAC,UVRAG,ARIH2,MYLIP,ARNT,VCP,SUPV3L1,SMURF1,PTPN1,LONRF3,PLK3,ZC3H12A,RNF19B,TP53INP2,PIM2,PIP4K2A,OPTN,PRR5L,NFE2L2,LONRF1,NEDD4L,RDX,SH3BP4,GIGYF2,ABHD5,NANOS1,PNPT1,HERPUD1,TIPARP,TOB1,PFKFB3,LDLR,ZFP36,EGLN2,OAZ1,ITCH,T…
GO:0034660	ncRNA metabolic process	81	497	0.26	9.46e-05	9606.ENSP00000199320,9606.ENSP00000212015,9606.ENSP00000216038,9606.ENSP00000216294,9606.ENSP00000216489,9606.ENSP00000230340,9606.ENSP00000230771,9606.ENSP00000231572,9606.ENSP00000237853,9606.ENSP00000244230,9606.ENSP00000254605,9606.ENSP00000256398,9606.ENSP00000261708,9606.ENSP00000262809,9606.ENSP00000264157,9606.ENSP00000272645,9606.ENSP00000274311,9606.ENSP00000274695,9606.ENSP00000282276,…	DIMT1,SIRT1,RTCB,SNAPC1,ALKBH1,BYSL,HARS2,RARS,ELL2,MPHOSPH10,RRP8,ELP3,UTP6,ELL,CCNT2,POLR2D,PELO,CDKAL1,MARS2,RIOK2,GTF2E1,NIFK,ICE1,UTP15,NOL6,TRMT10B,TSR1,ISG20,WDR3,UTP23,MEPCE,INTS6,TRMT10C,WDR75,PLD6,RRS1,RPUSD2,ISG20L2,KARS,CIRH1A,SMAD3,TARSL2,RIOK3,PIWIL2,PTRF,WDR37,WDR55,MDN1,PDCD11,TOE1,YRDC,AGO3,TEX10,ZCCHC6,RIOK1,TAF9,NOP2,TRMT44,TBP,UTP14A,AIMP1,ZNF143,WDR43,POP1,TARS,CHD7,EXOSC6,AA…
GO:0010558	negative regulation of macromolecule biosynthetic process	185	1425	0.16	9.69e-05	9606.ENSP00000157600,9606.ENSP00000164227,9606.ENSP00000209728,9606.ENSP00000212015,9606.ENSP00000216037,9606.ENSP00000221452,9606.ENSP00000222329,9606.ENSP00000225688,9606.ENSP00000226574,9606.ENSP00000228872,9606.ENSP00000229416,9606.ENSP00000230990,9606.ENSP00000234198,9606.ENSP00000235382,9606.ENSP00000239223,9606.ENSP00000239938,9606.ENSP00000242728,9606.ENSP00000244050,9606.ENSP00000244869,…	LMCD1,BCL3,CDC6,SIRT1,XBP1,RELB,ERF,RASD1,NFKB1,CDKN1B,GCLC,HBEGF,DLX2,RGS2,DUSP1,EGR1,BHLHE41,SNAI1,EREG,IRF1,FOSB,DLL4,FXR2,JUND,SESN2,RARA,THAP1,DNAJB1,RRP8,PER2,H3F3B,EIF2S1,MBD2,BHLHE40,TBX3,BACH2,AKIRIN2,HUS1,USP2,TRIM37,EPC1,MXD1,ASB1,LEF1,SRF,CREM,BTAF1,JDP2,FBXW7,NIPBL,FLCN,PPARG,BTG2,ZNF281,REL,MITF,NFIL3,TSC1,RUNX1,JUNB,LRP8,RNF139,CEBPB,PPM1D,EIF2AK3,ZBTB5,ZNF608,ZNF239,MEPCE,ZNF431,N…
GO:0051603	proteolysis involved in cellular protein catabolic process	85	532	0.25	0.00011	9606.ENSP00000157812,9606.ENSP00000158771,9606.ENSP00000171111,9606.ENSP00000185150,9606.ENSP00000209884,9606.ENSP00000212015,9606.ENSP00000216037,9606.ENSP00000217402,9606.ENSP00000219313,9606.ENSP00000237455,9606.ENSP00000242719,9606.ENSP00000247977,9606.ENSP00000248958,9606.ENSP00000249356,9606.ENSP00000252015,9606.ENSP00000256257,9606.ENSP00000259335,9606.ENSP00000260187,9606.ENSP00000261712,…	PSMC4,DERL2,KEAP1,ERLEC1,KLHL20,SIRT1,XBP1,CHMP4B,PSMD7,RNF103,RNF11,FBXL12,SDF2L1,DNAJB9,TRPC4AP,RNF122,KIAA0368,USP2,PSMD11,FAF2,UFD1L,PSMD3,BTBD11,FBXW7,USP12,UBAP1,HSP90B1,KCTD5,RNF139,RNF181,FBXO45,KCTD2,KLHL11,TOLLIP,RBBP6,VPS37A,RNF168,RCHY1,SIAH2,HSPA5,PMAIP1,YOD1,NPLOC4,KLHL25,KCTD21,RNF41,KCTD6,UBE2H,ARIH2,MYLIP,TRIM38,VCP,ZRANB1,TOPORS,SMURF1,BTRC,TP53INP2,UBR4,SYVN1,SQSTM1,USP49,USP8,…
GO:0001558	regulation of cell growth	69	402	0.28	0.00011	9606.ENSP00000158771,9606.ENSP00000212015,9606.ENSP00000216037,9606.ENSP00000228606,9606.ENSP00000228872,9606.ENSP00000230990,9606.ENSP00000235382,9606.ENSP00000253063,9606.ENSP00000254810,9606.ENSP00000256015,9606.ENSP00000260130,9606.ENSP00000261918,9606.ENSP00000262198,9606.ENSP00000263980,9606.ENSP00000264198,9606.ENSP00000265165,9606.ENSP00000265342,9606.ENSP00000265354,9606.ENSP00000265371,…	DERL2,SIRT1,XBP1,CYP27B1,CDKN1B,HBEGF,RGS2,SESN2,H3F3B,BTG1,SDCBP,SEMA7A,ADNP2,SLC9A1,MUL1,LEF1,FSTL4,SRF,NRP1,GAL,EAF2,PAK1,FLCN,PPARG,CRK,SLC25A33,ADAM17,CRLF3,DCUN1D3,SERTAD3,TNFRSF12A,SMAD3,NDEL1,SFN,CREB3,NET1,GOLGA4,ADIPOR2,SUPV3L1,MAP2,ENPP1,SMURF1,INO80,OSGIN1,BLZF1,SGK1,CTGF,TSPYL2,HSPA1B,ING1,EDN1,CDKL5,TAF9,IGFBP3,NEDD4L,BCL6,CDK11A,CDKN1A,SH3BP4,NANOS1,OSGIN2,CYR61,PPP2CA,CDKN2AIP,CRY…
GO:0016567	protein ubiquitination	98	645	0.23	0.00012	9606.ENSP00000171111,9606.ENSP00000209884,9606.ENSP00000212015,9606.ENSP00000232766,9606.ENSP00000233630,9606.ENSP00000237281,9606.ENSP00000237455,9606.ENSP00000242719,9606.ENSP00000247977,9606.ENSP00000252015,9606.ENSP00000255764,9606.ENSP00000256257,9606.ENSP00000257749,9606.ENSP00000262294,9606.ENSP00000262394,9606.ENSP00000263464,9606.ENSP00000264198,9606.ENSP00000264607,9606.ENSP00000268042,…	KEAP1,KLHL20,SIRT1,KLHL18,PCGF1,FBXO30,RNF103,RNF11,FBXL12,TRPC4AP,MED10,RNF122,BACH2,TRIM37,WSB1,BIRC3,MUL1,ASB1,ARRDC4,FEM1A,FEM1C,FBXW7,TRIM36,SH3RF1,MED8,MED27,RNF25,FBXO33,UNKL,RNF139,RNF181,FBXO45,RBBP6,MALT1,RNF168,RCHY1,RNF10,SIAH2,UBE2O,SPSB1,SOCS3,KLHL25,KCTD21,RNF41,WAC,KCTD6,UBE2H,ARIH2,MYLIP,TRIM38,VCP,PELI1,TOPORS,SMURF1,CTR9,PCGF6,BTRC,BCL10,TNKS2,LONRF3,TMEM189,RNF19B,UBR4,TRIM39,…
GO:0043632	modification-dependent macromolecule catabolic process	78	476	0.26	0.00012	9606.ENSP00000157812,9606.ENSP00000158771,9606.ENSP00000185150,9606.ENSP00000209884,9606.ENSP00000212015,9606.ENSP00000216037,9606.ENSP00000219313,9606.ENSP00000237455,9606.ENSP00000242719,9606.ENSP00000247977,9606.ENSP00000249356,9606.ENSP00000252015,9606.ENSP00000256257,9606.ENSP00000259335,9606.ENSP00000260187,9606.ENSP00000261712,9606.ENSP00000261942,9606.ENSP00000263202,9606.ENSP00000264639,…	PSMC4,DERL2,ERLEC1,KLHL20,SIRT1,XBP1,PSMD7,RNF103,RNF11,FBXL12,DNAJB9,TRPC4AP,RNF122,KIAA0368,USP2,PSMD11,FAF2,UFD1L,PSMD3,BTBD11,FBXW7,USP12,UBAP1,HSP90B1,KCTD5,RNF139,RNF181,FBXO45,KCTD2,KLHL11,TOLLIP,RBBP6,VPS37A,RNF168,RCHY1,SIAH2,HSPA5,YOD1,NPLOC4,KLHL25,KCTD21,KCTD6,UBE2H,ARIH2,MYLIP,TRIM38,VCP,ZRANB1,TOPORS,SMURF1,BTRC,TP53INP2,UBR4,SYVN1,SQSTM1,USP49,USP8,NFE2L2,VIMP,USP25,NEDD4L,UBE2J2,A…
GO:0051090	regulation of DNA-binding transcription factor activity	69	403	0.28	0.00012	9606.ENSP00000056217,9606.ENSP00000171111,9606.ENSP00000212015,9606.ENSP00000216117,9606.ENSP00000216797,9606.ENSP00000220751,9606.ENSP00000226574,9606.ENSP00000248244,9606.ENSP00000256458,9606.ENSP00000256495,9606.ENSP00000259808,9606.ENSP00000262294,9606.ENSP00000262510,9606.ENSP00000264832,9606.ENSP00000265026,9606.ENSP00000265354,9606.ENSP00000268184,9606.ENSP00000270162,9606.ENSP00000275015,…	ARHGEF5,KEAP1,SIRT1,HMOX1,NFKBIA,RIPK2,NFKB1,TICAM1,IRAK2,BHLHE40,RIPK1,TRIM37,NLRC5,ICAM1,MAP3K13,SRF,CRTC3,SIK1,NFKBIE,PPRC1,FER,PPARG,RNF25,TERF2IP,LRP8,FOS,ZNF431,FOSL1,TRIB1,CFLAR,CLU,MALT1,RIPK4,SMAD3,CREB3,RNF41,TRIM38,PELI1,PROX1,SGK1,DDR2,CRTC2,NFKB2,BTRC,CHUK,BCL10,JUN,PPAP2B,ZC3H12A,PIM1,KLF4,HSPA1B,RGCC,EDN1,DDX58,TRIM5,MED13,KDM5A,RELA,TLR6,CYLD,TRAF6,UBC,DDIT3,TRAF3,RPS6KA5,ITCH,TNF…
GO:0031401	positive regulation of protein modification process	154	1149	0.17	0.00015	9606.ENSP00000013125,9606.ENSP00000056217,9606.ENSP00000200453,9606.ENSP00000209728,9606.ENSP00000212015,9606.ENSP00000215631,9606.ENSP00000216037,9606.ENSP00000220325,9606.ENSP00000220751,9606.ENSP00000228872,9606.ENSP00000230990,9606.ENSP00000239938,9606.ENSP00000244869,9606.ENSP00000248244,9606.ENSP00000249075,9606.ENSP00000251849,9606.ENSP00000252809,9606.ENSP00000256458,9606.ENSP00000259808,…	MAP4K5,ARHGEF5,PPP1R15A,CDC6,SIRT1,GADD45B,XBP1,EHD4,RIPK2,CDKN1B,HBEGF,EGR1,EREG,TICAM1,LIF,RAF1,GDF15,IRAK2,RIPK1,SDCBP,DCUN1D5,THBS1,CCND2,SEMA7A,SPAG9,C19orf10,MAP3K8,BIRC3,ACVR1,MAP4K3,CCNT2,MUL1,ALS2,RAPGEF2,IL11,DNAJC27,ICAM1,MAP3K13,ARRDC3,NRP1,MAPKAP1,JDP2,ARRDC4,GAREM,AKAP8,TNFRSF10B,PAK1,FBXW7,NIPBL,SH3RF1,FLCN,PRKAG2,HMGCR,BRAF,ITGA5,FGF19,TGFA,CCNL1,SENP2,F2RL1,TERF2IP,CRK,IL12A,FNTA…
GO:0030163	protein catabolic process	94	615	0.23	0.00016	9606.ENSP00000157812,9606.ENSP00000158771,9606.ENSP00000171111,9606.ENSP00000185150,9606.ENSP00000209884,9606.ENSP00000212015,9606.ENSP00000216037,9606.ENSP00000217402,9606.ENSP00000219313,9606.ENSP00000237455,9606.ENSP00000242719,9606.ENSP00000247977,9606.ENSP00000248958,9606.ENSP00000249356,9606.ENSP00000252015,9606.ENSP00000256257,9606.ENSP00000259335,9606.ENSP00000259808,9606.ENSP00000260187,…	PSMC4,DERL2,KEAP1,ERLEC1,KLHL20,SIRT1,XBP1,CHMP4B,PSMD7,RNF103,RNF11,FBXL12,SDF2L1,DNAJB9,TRPC4AP,RNF122,KIAA0368,RIPK1,USP2,PSMD11,FAF2,UFD1L,PSMD3,BTBD11,FBXW7,USP12,TMEM199,UBAP1,HSP90B1,KCTD5,RNF139,RNF181,FBXO45,KCTD2,KLHL11,TOLLIP,CLU,RBBP6,VPS37A,RNF168,RCHY1,SIAH2,HSPA5,PMAIP1,YOD1,CLN8,NPLOC4,RAB12,KLHL25,KCTD21,RNF41,KCTD6,UBE2H,ARIH2,MYLIP,TRIM38,VCP,ZRANB1,TOPORS,SMURF1,BTRC,TP53INP2,…
GO:0010629	negative regulation of gene expression	209	1670	0.14	0.00018	9606.ENSP00000157600,9606.ENSP00000164227,9606.ENSP00000212015,9606.ENSP00000216037,9606.ENSP00000221452,9606.ENSP00000222329,9606.ENSP00000223095,9606.ENSP00000225688,9606.ENSP00000226574,9606.ENSP00000228872,9606.ENSP00000229416,9606.ENSP00000234198,9606.ENSP00000235382,9606.ENSP00000239938,9606.ENSP00000242728,9606.ENSP00000244050,9606.ENSP00000244869,9606.ENSP00000245414,9606.ENSP00000245919,…	LMCD1,BCL3,SIRT1,XBP1,RELB,ERF,SERPINE1,RASD1,NFKB1,CDKN1B,GCLC,DLX2,RGS2,EGR1,BHLHE41,SNAI1,EREG,IRF1,FOSB,DLL4,FXR2,JUND,SESN2,RARA,THAP1,DNAJB1,RRP8,PER2,H3F3B,EIF2S1,MBD2,BHLHE40,TBX3,BACH2,AKIRIN2,USP2,THBS1,TRIM37,ACIN1,EPC1,BIRC3,MXD1,LEF1,SRF,CREM,BTAF1,JDP2,POLR2D,PELO,CCRN4L,NIPBL,FLCN,PPARG,BTG2,FGF19,ZNF281,REL,MITF,SNIP1,NFIL3,TSC1,RUNX1,JUNB,LRP8,RNF139,CEBPB,PPM1D,EIF2AK3,ZBTB5,ZNF…
GO:0042326	negative regulation of phosphorylation	75	458	0.26	0.00018	9606.ENSP00000014914,9606.ENSP00000179259,9606.ENSP00000212015,9606.ENSP00000215631,9606.ENSP00000216037,9606.ENSP00000225174,9606.ENSP00000228872,9606.ENSP00000235382,9606.ENSP00000239223,9606.ENSP00000249075,9606.ENSP00000252992,9606.ENSP00000276925,9606.ENSP00000283228,9606.ENSP00000284273,9606.ENSP00000285071,9606.ENSP00000287878,9606.ENSP00000287936,9606.ENSP00000288943,9606.ENSP00000296343,…	GPRC5A,C12orf5,SIRT1,GADD45B,XBP1,PPIF,CDKN1B,RGS2,DUSP1,LIF,CEP85,CDKN2B,PTPRR,UBASH3B,FLCN,PRKAG2,HMGCR,DUSP2,KIAA0226,F2RL1,DUSP16,TERF2IP,MIDN,IBTK,YWHAG,DDIT4,PDE12,TRIB1,PER1,PIBF1,HSPH1,SOCS3,CAV1,SFN,ATF3,PMEPA1,ANKLE2,KIRREL,ADARB1,ENPP1,DUSP10,PPP1R15B,EFNA1,EIF3A,DUSP5,GADD45A,JUN,PPAP2B,PTPN1,ZC3H12A,DKK1,BAK1,KLF4,SPRY2,ERRFI1,FLRT3,PRR5L,XDH,GPS2,IGFBP3,LATS2,SH3BP5,DUSP8,GRB10,CDKN…
GO:0006470	protein dephosphorylation	41	194	0.37	0.00019	9606.ENSP00000200453,9606.ENSP00000215904,9606.ENSP00000239223,9606.ENSP00000254654,9606.ENSP00000264775,9606.ENSP00000279387,9606.ENSP00000283228,9606.ENSP00000284273,9606.ENSP00000288943,9606.ENSP00000298573,9606.ENSP00000303706,9606.ENSP00000306682,9606.ENSP00000308318,9606.ENSP00000315713,9606.ENSP00000325074,9606.ENSP00000344909,9606.ENSP00000346255,9606.ENSP00000354916,9606.ENSP00000355866,…	PPP1R15A,PDXP,DUSP1,ILKAP,PPAP2A,PPP4C,PTPRR,UBASH3B,DUSP2,DUSP16,CDC25A,PPM1D,PPP1R3B,SSH1,PPP2R2A,PTP4A2,PPTC7,CDC14A,DUSP10,PPP1R15B,DUSP12,DUSP5,BTRC,DNAJC6,PPAP2B,PTPN1,EYA3,PTPRH,PDP1,DUSP8,PPP3CC,TPTE2,PPP4R1,MTMR3,NCK1,PPP2CA,DAPP1,PTPN21,PHLPP2,RPAP2,DUSP14
GO:0016311	dephosphorylation	53	285	0.31	0.00022	9606.ENSP00000179259,9606.ENSP00000200453,9606.ENSP00000215904,9606.ENSP00000221086,9606.ENSP00000239223,9606.ENSP00000254654,9606.ENSP00000264380,9606.ENSP00000264775,9606.ENSP00000279387,9606.ENSP00000283228,9606.ENSP00000284273,9606.ENSP00000285381,9606.ENSP00000288943,9606.ENSP00000298573,9606.ENSP00000303706,9606.ENSP00000306682,9606.ENSP00000308318,9606.ENSP00000315713,9606.ENSP00000325074,…	C12orf5,PPP1R15A,PDXP,MTMR9,DUSP1,ILKAP,PIKFYVE,PPAP2A,PPP4C,PTPRR,UBASH3B,CA3,DUSP2,DUSP16,CDC25A,PPM1D,PPP1R3B,SSH1,PPP2R2A,NT5C2,PTP4A2,PPTC7,CDC14A,DUSP10,PPP1R15B,DUSP12,DUSP5,BTRC,DNAJC6,PPAP2B,PTPN1,EYA3,PTPRH,INPP1,NT5DC3,PDP1,DUSP8,PPP3CC,TMEM55B,TPTE2,PPP4R1,MTMR3,PPAPDC1B,LPIN1,SYNJ1,NCK1,PPP2CA,DAPP1,PFKFB3,PTPN21,PHLPP2,RPAP2,DUSP14
GO:0044265	cellular macromolecule catabolic process	119	842	0.2	0.00023	9606.ENSP00000157812,9606.ENSP00000158771,9606.ENSP00000171111,9606.ENSP00000185150,9606.ENSP00000209884,9606.ENSP00000212015,9606.ENSP00000216037,9606.ENSP00000217402,9606.ENSP00000219313,9606.ENSP00000227322,9606.ENSP00000237455,9606.ENSP00000242719,9606.ENSP00000247977,9606.ENSP00000248958,9606.ENSP00000249356,9606.ENSP00000252015,9606.ENSP00000256257,9606.ENSP00000259335,9606.ENSP00000259808,…	PSMC4,DERL2,KEAP1,ERLEC1,KLHL20,SIRT1,XBP1,CHMP4B,PSMD7,ZPR1,RNF103,RNF11,FBXL12,SDF2L1,DNAJB9,TRPC4AP,RNF122,KIAA0368,RIPK1,USP2,PSMD11,FAF2,UFD1L,PSMD3,POLR2D,PELO,CCRN4L,BTBD11,FBXW7,USP12,TMEM199,UBAP1,HSP90B1,KCTD5,RNF139,ISG20,RNF181,PDE12,FBXO45,KCTD2,RNASEH1,KLHL11,ZHX2,TOLLIP,RBBP6,VPS37A,EDC3,RNF168,RCHY1,SIAH2,HSPA5,PPP2R2A,PMAIP1,YOD1,NPLOC4,RAB12,DHX34,KLHL25,PNRC1,KCTD21,GSPT2,RNF41…
GO:0030334	regulation of cell migration	109	753	0.21	0.00023	9606.ENSP00000212015,9606.ENSP00000216037,9606.ENSP00000216117,9606.ENSP00000223095,9606.ENSP00000230990,9606.ENSP00000244050,9606.ENSP00000249749,9606.ENSP00000254958,9606.ENSP00000256398,9606.ENSP00000260130,9606.ENSP00000260356,9606.ENSP00000262013,9606.ENSP00000263339,9606.ENSP00000263640,9606.ENSP00000264036,9606.ENSP00000264431,9606.ENSP00000264832,9606.ENSP00000265165,9606.ENSP00000265354,…	SIRT1,XBP1,HMOX1,SERPINE1,HBEGF,SNAI1,DLL4,JAG1,ELP3,SDCBP,THBS1,SPAG9,IL1A,ACVR1,MCAM,RAPGEF2,ICAM1,LEF1,SRF,NRP1,RHOB,PLK2,PAK1,FER,NIPBL,PTPRR,FLCN,PPARG,ITGA5,CXCL3,CXCL5,F2RL1,CRK,FADD,IL12A,PRKCE,CXCL8,ADAM17,TRIB1,DAB2,SSH1,ZNF609,RAP2B,PHLDA2,CALR,HSPA5,LAMA3,KARS,CSF1,PDGFB,SMAD3,ARID2,STARD13,CREB3,RNF41,DPYSL3,MAP2K3,PDGFA,EPHA2,P2RX4,ADARB1,LRIG2,DUSP10,PROX1,SGK1,DDR2,EFNA1,IL6R,NUS1…
GO:0045936	negative regulation of phosphate metabolic process	87	562	0.24	0.00023	9606.ENSP00000014914,9606.ENSP00000179259,9606.ENSP00000200453,9606.ENSP00000212015,9606.ENSP00000215631,9606.ENSP00000216037,9606.ENSP00000225174,9606.ENSP00000228515,9606.ENSP00000228872,9606.ENSP00000235382,9606.ENSP00000239223,9606.ENSP00000244230,9606.ENSP00000249075,9606.ENSP00000252992,9606.ENSP00000254037,9606.ENSP00000262809,9606.ENSP00000276925,9606.ENSP00000283228,9606.ENSP00000284273,…	GPRC5A,C12orf5,PPP1R15A,SIRT1,GADD45B,XBP1,PPIF,CSRNP2,CDKN1B,RGS2,DUSP1,MPHOSPH10,LIF,CEP85,ZCCHC9,ELL,CDKN2B,PTPRR,UBASH3B,FLCN,PRKAG2,HMGCR,DUSP2,KIAA0226,F2RL1,DUSP16,TERF2IP,MIDN,IBTK,YWHAG,DDIT4,PDE12,BOD1,TRIB1,PER1,PIBF1,HSPH1,SOCS3,PDGFB,CAV1,SFN,ATF3,PMEPA1,PDGFA,ANKLE2,KIRREL,ADARB1,ENPP1,PPP1R14C,DUSP10,PPP1R15B,EFNA1,EIF3A,DUSP5,GADD45A,JUN,PPAP2B,PTPN1,ZC3H12A,DKK1,BAK1,KLF4,SPRY2,E…
GO:2000145	regulation of cell motility	115	807	0.2	0.00024	9606.ENSP00000212015,9606.ENSP00000216037,9606.ENSP00000216117,9606.ENSP00000223095,9606.ENSP00000230990,9606.ENSP00000244050,9606.ENSP00000244869,9606.ENSP00000249749,9606.ENSP00000251849,9606.ENSP00000254958,9606.ENSP00000256398,9606.ENSP00000260130,9606.ENSP00000260356,9606.ENSP00000262013,9606.ENSP00000262498,9606.ENSP00000263339,9606.ENSP00000263640,9606.ENSP00000264036,9606.ENSP00000264431,…	SIRT1,XBP1,HMOX1,SERPINE1,HBEGF,SNAI1,EREG,DLL4,RAF1,JAG1,ELP3,SDCBP,THBS1,SPAG9,CFAP20,IL1A,ACVR1,MCAM,RAPGEF2,ICAM1,LEF1,SRF,NRP1,RHOB,PLK2,PAK1,FER,NIPBL,PTPRR,FLCN,PPARG,ITGA5,MEMO1,CXCL3,CXCL5,F2RL1,CRK,FADD,IL12A,PRKCE,CXCL8,ADAM17,TRIB1,DAB2,SSH1,ZNF609,RAP2B,PHLDA2,CALR,HSPA5,LAMA3,KARS,CSF1,PDGFB,SMAD3,ARID2,STARD13,CREB3,RNF41,DPYSL3,MAP2K3,PDGFA,PTRF,EPHA2,P2RX4,ADARB1,LRIG2,DUSP10,PRO…
GO:0034097	response to cytokine	140	1035	0.18	0.00027	9606.ENSP00000064780,9606.ENSP00000171111,9606.ENSP00000209884,9606.ENSP00000212015,9606.ENSP00000216037,9606.ENSP00000216117,9606.ENSP00000216797,9606.ENSP00000220751,9606.ENSP00000221452,9606.ENSP00000222812,9606.ENSP00000226574,9606.ENSP00000227752,9606.ENSP00000228606,9606.ENSP00000229416,9606.ENSP00000239938,9606.ENSP00000244869,9606.ENSP00000245414,9606.ENSP00000245817,9606.ENSP00000249075,…	RELT,KEAP1,KLHL20,SIRT1,XBP1,HMOX1,NFKBIA,RIPK2,RELB,STX1A,NFKB1,IL10RA,CYP27B1,GCLC,EGR1,EREG,IRF1,TNFSF9,LIF,JUND,NUMBL,RARA,IRAK2,OASL,TRAFD1,RIPK1,THBS1,MAP3K8,IL1A,BIRC3,MAP4K3,IL11,ICAM1,LEF1,SRF,TNFRSF10B,FER,IFNGR2,STAT5B,REL,PCOLCE2,CXCL3,CXCL5,NFIL3,HSP90B1,CRK,IL12A,JUNB,LRP8,CEBPB,B3GNT2,FOS,CXCL8,ISG20,PDE12,CLCF1,ADAM17,FOSL1,TNFRSF10D,TOLLIP,MMP1,HSPA5,KARS,TNFRSF12A,CSF1,P4HB,IFNL…
GO:1903320	regulation of protein modification by small protein conjugation or removal	44	220	0.35	0.00027	9606.ENSP00000220751,9606.ENSP00000229416,9606.ENSP00000239938,9606.ENSP00000248244,9606.ENSP00000254657,9606.ENSP00000260247,9606.ENSP00000262384,9606.ENSP00000263464,9606.ENSP00000264198,9606.ENSP00000265138,9606.ENSP00000268042,9606.ENSP00000269856,9606.ENSP00000281708,9606.ENSP00000296257,9606.ENSP00000304051,9606.ENSP00000306124,9606.ENSP00000314733,9606.ENSP00000318966,9606.ENSP00000319279,…	RIPK2,GCLC,EGR1,TICAM1,PER2,DCUN1D5,N4BP1,BIRC3,MUL1,ARRDC3,ARRDC4,FEM1A,FBXW7,SENP2,RNF139,PRKCE,TOLLIP,PINX1,MALT1,DCUN1D3,RCHY1,SIAH2,HSPA5,CAV1,RASSF1,ARNT,VCP,PELI1,TOPORS,CTR9,BCL10,ZC3H12A,DAXX,HSPA1B,GPS2,RELA,HERPUD1,DCUN1D2,UBR5,TRAF6,RNF111,BIRC2,ITCH,TNFAIP3
GO:1903573	negative regulation of response to endoplasmic reticulum stress	17	44	0.63	0.00027	9606.ENSP00000158771,9606.ENSP00000185150,9606.ENSP00000200453,9606.ENSP00000216037,9606.ENSP00000249356,9606.ENSP00000315130,9606.ENSP00000324173,9606.ENSP00000326813,9606.ENSP00000342136,9606.ENSP00000356156,9606.ENSP00000360683,9606.ENSP00000366395,9606.ENSP00000381282,9606.ENSP00000383044,9606.ENSP00000409555,9606.ENSP00000417273,9606.ENSP00000473631	DERL2,ERLEC1,PPP1R15A,XBP1,DNAJB9,CLU,HSPA5,YOD1,CREB3,PPP1R15B,PTPN1,SYVN1,VIMP,USP25,HERPUD1,NCK1,DNAJC3
GO:0031668	cellular response to extracellular stimulus	46	235	0.34	0.00028	9606.ENSP00000212015,9606.ENSP00000215904,9606.ENSP00000216037,9606.ENSP00000216117,9606.ENSP00000253063,9606.ENSP00000254605,9606.ENSP00000256383,9606.ENSP00000262039,9606.ENSP00000264832,9606.ENSP00000265354,9606.ENSP00000266458,9606.ENSP00000276925,9606.ENSP00000287820,9606.ENSP00000297991,9606.ENSP00000298552,9606.ENSP00000299767,9606.ENSP00000304004,9606.ENSP00000304501,9606.ENSP00000306245,…	SIRT1,PDXP,XBP1,HMOX1,SESN2,RRP8,EIF2S1,PIK3C3,ICAM1,SRF,GABARAPL1,CDKN2B,PPARG,AQP3,TSC1,HSP90B1,FOXA3,ADORA2B,FOS,PPM1D,EIF2AK3,TBL2,FOSL1,SSH1,HSPA5,PMAIP1,UPP1,CAV1,MIOS,ATF3,NR4A2,P2RX4,NUAK2,GLRX2,JUN,RRAGC,ZC3H12A,PIM1,NFE2L2,MTMR3,CDKN1A,ATP2B1,CADPS2,FNIP1,ZFYVE1,BHLHA15
GO:0042327	positive regulation of phosphorylation	134	984	0.18	0.00031	9606.ENSP00000013125,9606.ENSP00000056217,9606.ENSP00000179259,9606.ENSP00000209728,9606.ENSP00000212015,9606.ENSP00000215631,9606.ENSP00000216037,9606.ENSP00000220325,9606.ENSP00000220751,9606.ENSP00000228872,9606.ENSP00000230990,9606.ENSP00000239938,9606.ENSP00000244869,9606.ENSP00000249075,9606.ENSP00000251849,9606.ENSP00000252809,9606.ENSP00000256458,9606.ENSP00000259808,9606.ENSP00000260130,…	MAP4K5,ARHGEF5,C12orf5,CDC6,SIRT1,GADD45B,XBP1,EHD4,RIPK2,CDKN1B,HBEGF,EGR1,EREG,LIF,RAF1,GDF15,IRAK2,RIPK1,SDCBP,THBS1,CCND2,SEMA7A,SPAG9,C19orf10,MAP3K8,ACVR1,MAP4K3,CCNT2,MUL1,ALS2,RAPGEF2,IL11,DNAJC27,ICAM1,MAP3K13,NRP1,MAPKAP1,GAREM,TNFRSF10B,PAK1,FBXW7,SH3RF1,FLCN,PRKAG2,HMGCR,BRAF,ITGA5,FGF19,TGFA,CCNL1,SENP2,F2RL1,TERF2IP,CRK,IL12A,LRP8,ADORA2B,PRKCE,CLCF1,ADAM17,ZNF622,CFLAR,DAB2,CLU,DVL…
GO:0045089	positive regulation of innate immune response	49	259	0.32	0.00031	9606.ENSP00000216797,9606.ENSP00000220751,9606.ENSP00000221452,9606.ENSP00000226574,9606.ENSP00000229332,9606.ENSP00000244869,9606.ENSP00000248244,9606.ENSP00000251849,9606.ENSP00000256458,9606.ENSP00000259808,9606.ENSP00000262039,9606.ENSP00000262510,9606.ENSP00000278568,9606.ENSP00000293328,9606.ENSP00000296677,9606.ENSP00000299767,9606.ENSP00000301838,9606.ENSP00000303231,9606.ENSP00000306124,…	NFKBIA,RIPK2,RELB,NFKB1,CLEC4A,EREG,TICAM1,RAF1,IRAK2,RIPK1,PIK3C3,NLRC5,PAK1,STAT5B,F2RL1,HSP90B1,FADD,IL12A,PRKCE,MALT1,POLR3C,CAV1,RIOK3,PSPC1,SFPQ,ANKRD17,PELI1,CHUK,BCL10,PTAFR,HSPA1B,HLA-E,DDX58,TRIM5,RSAD2,AP1G1,POLR3D,RELA,TLR6,CYLD,PVR,MUC4,TRAF6,UBC,TRAF3,RPS6KA5,ITCH,TNFAIP3,IKBKG
GO:0051270	regulation of cellular component movement	123	886	0.19	0.00033	9606.ENSP00000212015,9606.ENSP00000216037,9606.ENSP00000216117,9606.ENSP00000223095,9606.ENSP00000228872,9606.ENSP00000230990,9606.ENSP00000244050,9606.ENSP00000244869,9606.ENSP00000249749,9606.ENSP00000251849,9606.ENSP00000254958,9606.ENSP00000256398,9606.ENSP00000260130,9606.ENSP00000260356,9606.ENSP00000262013,9606.ENSP00000262498,9606.ENSP00000263339,9606.ENSP00000263640,9606.ENSP00000264036,…	SIRT1,XBP1,HMOX1,SERPINE1,CDKN1B,HBEGF,SNAI1,EREG,DLL4,RAF1,JAG1,ELP3,SDCBP,THBS1,SPAG9,CFAP20,IL1A,ACVR1,MCAM,RAPGEF2,ICAM1,LEF1,SRF,NRP1,RHOB,PLK2,PAK1,FER,NIPBL,PTPRR,FLCN,PPARG,ITGA5,MEMO1,CXCL3,CXCL5,F2RL1,CRK,FADD,IL12A,PRKCE,CXCL8,ADAM17,TRIB1,DAB2,SSH1,ZNF609,RAP2B,PHLDA2,CALR,HSPA5,LAMA3,KARS,CSF1,PDGFB,PDE4B,SMAD3,ARID2,STARD13,CAV1,CREB3,RNF41,DPYSL3,MAP2K3,PDGFA,PTRF,EPHA2,P2RX4,MAP2,…
GO:0034599	cellular response to oxidative stress	44	222	0.34	0.00033	9606.ENSP00000212015,9606.ENSP00000216037,9606.ENSP00000216117,9606.ENSP00000220659,9606.ENSP00000221130,9606.ENSP00000224140,9606.ENSP00000225174,9606.ENSP00000253063,9606.ENSP00000254846,9606.ENSP00000256383,9606.ENSP00000262198,9606.ENSP00000262746,9606.ENSP00000272233,9606.ENSP00000281092,9606.ENSP00000300574,9606.ENSP00000306245,9606.ENSP00000306894,9606.ENSP00000310042,9606.ENSP00000312455,…	SIRT1,XBP1,HMOX1,BRF2,GSR,SETX,PPIF,SESN2,KDM6B,EIF2S1,ADNP2,PRDX1,RHOB,FER,CRK,FOS,ETV5,ZNF622,CFLAR,NR4A2,NET1,ARNT,GLRX2,CHUK,JUN,ZC3H12A,ADPRHL2,KLF4,HSPA1B,PRR5L,SRXN1,GPX3,ETS1,SLC11A2,NFE2L2,VIMP,RELA,ARNTL,FOXO3,PNPT1,TXNRD1,ATP2A2,CPEB2,TNFAIP3
GO:0043620	regulation of DNA-templated transcription in response to stress	22	73	0.52	0.00033	9606.ENSP00000216037,9606.ENSP00000216117,9606.ENSP00000239938,9606.ENSP00000250457,9606.ENSP00000253063,9606.ENSP00000254322,9606.ENSP00000305422,9606.ENSP00000324173,9606.ENSP00000344352,9606.ENSP00000351407,9606.ENSP00000358081,9606.ENSP00000360266,9606.ENSP00000380252,9606.ENSP00000382805,9606.ENSP00000384273,9606.ENSP00000417273,9606.ENSP00000435210,9606.ENSP00000435412,9606.ENSP00000441543,…	XBP1,HMOX1,EGR1,EGLN3,SESN2,DNAJB1,CEBPB,HSPA5,ATF3,ARNT,BAG3,JUN,NFE2L2,BACH1,RELA,NCK1,BCLAF1,RPS6KA1,UBC,CITED2,DDIT3,EGLN2
GO:0045937	positive regulation of phosphate metabolic process	141	1052	0.17	0.00036	9606.ENSP00000013125,9606.ENSP00000056217,9606.ENSP00000179259,9606.ENSP00000200453,9606.ENSP00000209728,9606.ENSP00000212015,9606.ENSP00000215631,9606.ENSP00000216037,9606.ENSP00000220325,9606.ENSP00000220751,9606.ENSP00000221086,9606.ENSP00000228872,9606.ENSP00000230361,9606.ENSP00000230990,9606.ENSP00000239938,9606.ENSP00000244869,9606.ENSP00000249075,9606.ENSP00000251849,9606.ENSP00000252809,…	MAP4K5,ARHGEF5,C12orf5,PPP1R15A,CDC6,SIRT1,GADD45B,XBP1,EHD4,RIPK2,MTMR9,CDKN1B,GUCA1B,HBEGF,EGR1,EREG,LIF,RAF1,GDF15,IRAK2,RIPK1,SDCBP,THBS1,CCND2,SEMA7A,SPAG9,C19orf10,MAP3K8,ACVR1,MAP4K3,CCNT2,MUL1,ALS2,RAPGEF2,IL11,DNAJC27,ICAM1,MAP3K13,NRP1,MAPKAP1,GAREM,TNFRSF10B,PAK1,FBXW7,SH3RF1,FLCN,PRKAG2,HMGCR,BRAF,ITGA5,FGF19,TGFA,CCNL1,SENP2,F2RL1,TERF2IP,CRK,IL12A,LRP8,ADORA2B,PRKCE,CLCF1,ADAM17,ZNF…
GO:0048584	positive regulation of response to stimulus	246	2054	0.12	0.00038	9606.ENSP00000013125,9606.ENSP00000056217,9606.ENSP00000157600,9606.ENSP00000179259,9606.ENSP00000200453,9606.ENSP00000202556,9606.ENSP00000212015,9606.ENSP00000215631,9606.ENSP00000216037,9606.ENSP00000216373,9606.ENSP00000216797,9606.ENSP00000220751,9606.ENSP00000221452,9606.ENSP00000222812,9606.ENSP00000223095,9606.ENSP00000225174,9606.ENSP00000226574,9606.ENSP00000228606,9606.ENSP00000229332,…	MAP4K5,ARHGEF5,LMCD1,C12orf5,PPP1R15A,PPP1R13B,SIRT1,GADD45B,XBP1,SOS2,NFKBIA,RIPK2,RELB,STX1A,SERPINE1,PPIF,NFKB1,CYP27B1,CLEC4A,HBEGF,MSH6,EREG,PLAGL2,TICAM1,LIF,DLL4,RAF1,MICB,GDF15,RARA,JAG1,MBD2,IRAK2,RIPK1,SDCBP,THBS1,SEMA7A,SPAG9,PIK3C3,NLRC5,C19orf10,MAP3K8,BRD4,BIRC3,ACVR1,MAP4K3,SLC9A1,MUL1,ALS2,RAPGEF2,IL11,DNAJC27,ICAM1,MAP3K13,GOLPH3,NRP1,GAL,EIF2B2,GAREM,PELO,TNFRSF10B,CDKN2B,PAK1,F…
GO:0040012	regulation of locomotion	122	881	0.19	0.00038	9606.ENSP00000212015,9606.ENSP00000216037,9606.ENSP00000216117,9606.ENSP00000217402,9606.ENSP00000223095,9606.ENSP00000230990,9606.ENSP00000244050,9606.ENSP00000244869,9606.ENSP00000249749,9606.ENSP00000251849,9606.ENSP00000254958,9606.ENSP00000256398,9606.ENSP00000260130,9606.ENSP00000260356,9606.ENSP00000262013,9606.ENSP00000262498,9606.ENSP00000263339,9606.ENSP00000263640,9606.ENSP00000264036,…	SIRT1,XBP1,HMOX1,CHMP4B,SERPINE1,HBEGF,SNAI1,EREG,DLL4,RAF1,JAG1,ELP3,SDCBP,THBS1,SPAG9,CFAP20,IL1A,ACVR1,MCAM,RAPGEF2,ICAM1,ARRDC3,LEF1,SRF,NRP1,VPS37B,RHOB,PLK2,PAK1,FER,NIPBL,PTPRR,FLCN,PPARG,ITGA5,MEMO1,CXCL3,CXCL5,F2RL1,CRK,FADD,IL12A,PRKCE,CXCL8,ADAM17,TRIB1,DAB2,SSH1,ZNF609,RAP2B,PHLDA2,CALR,HSPA5,LAMA3,KARS,CSF1,PDGFB,SMAD3,ARID2,STX3,STARD13,CREB3,RNF41,DPYSL3,MAP2K3,PDGFA,PTRF,EPHA2,P2R…
GO:2001233	regulation of apoptotic signaling pathway	65	388	0.27	0.00038	9606.ENSP00000198767,9606.ENSP00000202556,9606.ENSP00000212015,9606.ENSP00000216037,9606.ENSP00000216117,9606.ENSP00000223095,9606.ENSP00000225174,9606.ENSP00000229416,9606.ENSP00000244050,9606.ENSP00000246229,9606.ENSP00000251849,9606.ENSP00000259808,9606.ENSP00000260356,9606.ENSP00000260442,9606.ENSP00000263339,9606.ENSP00000263640,9606.ENSP00000264198,9606.ENSP00000264832,9606.ENSP00000265371,…	RRN3,PPP1R13B,SIRT1,XBP1,HMOX1,SERPINE1,PPIF,GCLC,SNAI1,PLAGL2,RAF1,RIPK1,THBS1,BCL2L10,IL1A,ACVR1,MUL1,ICAM1,NRP1,TNFRSF10B,FBXW7,SH3RF1,FADD,YWHAG,EIF2AK3,CFLAR,CLU,HSPH1,SIAH2,PMAIP1,TNFRSF12A,P4HB,SMAD3,CAV1,PLAUR,SFN,CREB3,ATF3,NR4A2,SFPQ,SGMS1,PEA15,MCL1,GCLM,BCL10,PTPN1,EYA3,BAK1,HSPA1B,TRIM39,SYVN1,TAF9,NKX3-1,NFE2L2,VIMP,RELA,CYLD,HERPUD1,SKIL,NCK1,BCLAF1,DDIT3,BDKRB2,DEDD2,TNFAIP3
GO:0002833	positive regulation of response to biotic stimulus	51	277	0.31	0.00038	9606.ENSP00000216797,9606.ENSP00000220751,9606.ENSP00000221452,9606.ENSP00000226574,9606.ENSP00000229332,9606.ENSP00000244869,9606.ENSP00000248244,9606.ENSP00000251849,9606.ENSP00000256458,9606.ENSP00000259808,9606.ENSP00000262039,9606.ENSP00000262510,9606.ENSP00000278568,9606.ENSP00000293328,9606.ENSP00000296677,9606.ENSP00000299767,9606.ENSP00000301838,9606.ENSP00000303231,9606.ENSP00000306124,…	NFKBIA,RIPK2,RELB,NFKB1,CLEC4A,EREG,TICAM1,RAF1,IRAK2,RIPK1,PIK3C3,NLRC5,PAK1,STAT5B,F2RL1,HSP90B1,FADD,IL12A,PRKCE,MALT1,POLR3C,CAV1,RIOK3,PSPC1,SFPQ,ANKRD17,PELI1,CHUK,BCL10,PTAFR,HSPA1B,HLA-E,OPTN,DDX58,TRIM5,CD274,RSAD2,AP1G1,POLR3D,RELA,TLR6,CYLD,PVR,MUC4,TRAF6,UBC,TRAF3,RPS6KA5,ITCH,TNFAIP3,IKBKG
GO:0006979	response to oxidative stress	63	373	0.27	0.0004	9606.ENSP00000212015,9606.ENSP00000216037,9606.ENSP00000216117,9606.ENSP00000220659,9606.ENSP00000221130,9606.ENSP00000224140,9606.ENSP00000225174,9606.ENSP00000229416,9606.ENSP00000239223,9606.ENSP00000252229,9606.ENSP00000253063,9606.ENSP00000254846,9606.ENSP00000256015,9606.ENSP00000256383,9606.ENSP00000262198,9606.ENSP00000262746,9606.ENSP00000264276,9606.ENSP00000272233,9606.ENSP00000280612,…	SIRT1,XBP1,HMOX1,BRF2,GSR,SETX,PPIF,GCLC,DUSP1,MICB,SESN2,KDM6B,BTG1,EIF2S1,ADNP2,PRDX1,ALS2,RHOB,SLC7A11,FER,CA3,CRK,FOS,ETV5,ZNF622,FOSL1,CFLAR,NR4A2,NET1,ARNT,PPP1R15B,GLRX2,GCLM,CHUK,ABCC2,JUN,PLK3,MTF1,ZC3H12A,ADPRHL2,BAK1,KLF4,HSPA1B,PRR5L,EDN1,SRXN1,GPX3,ETS1,SLC11A2,NFE2L2,VIMP,RELA,ARNTL,FOXO3,PNPT1,TRA2B,CSB-PGBD3,CRYAB,TXNRD1,ATP2A2,CPEB2,TNFAIP3,NR4A3
GO:0002237	response to molecule of bacterial origin	56	317	0.29	0.0004	9606.ENSP00000064780,9606.ENSP00000216037,9606.ENSP00000216797,9606.ENSP00000220751,9606.ENSP00000223095,9606.ENSP00000226574,9606.ENSP00000227752,9606.ENSP00000228606,9606.ENSP00000248244,9606.ENSP00000252818,9606.ENSP00000254066,9606.ENSP00000256458,9606.ENSP00000257787,9606.ENSP00000264832,9606.ENSP00000269701,9606.ENSP00000276431,9606.ENSP00000280614,9606.ENSP00000281092,9606.ENSP00000296026,…	RELT,XBP1,NFKBIA,RIPK2,SERPINE1,NFKB1,IL10RA,CYP27B1,TICAM1,JUND,RARA,IRAK2,AKIRIN2,ICAM1,AKAP8,TNFRSF10B,CCRN4L,FER,CXCL3,CXCL5,IL12A,JUNB,CEBPB,PRKCE,FOS,CXCL8,ADAM17,TNFRSF10D,TRIB1,NFKBIB,MALT1,PDE4B,PELI1,CTR9,DUSP10,NFKB2,CHUK,ABCC2,BCL10,JUN,ANKRD1,ZC3H12A,PTAFR,EDN1,CXCL1,VIMP,RELA,TLR6,CXCL2,TRAF6,ADM,ATP2A2,LITAF,ZFP36,TNFRSF9,TNFAIP3
GO:0043122	regulation of I-kappaB kinase/NF-kappaB signaling	36	167	0.38	0.00043	9606.ENSP00000212015,9606.ENSP00000220751,9606.ENSP00000248244,9606.ENSP00000259808,9606.ENSP00000263377,9606.ENSP00000263464,9606.ENSP00000276431,9606.ENSP00000295025,9606.ENSP00000296677,9606.ENSP00000300086,9606.ENSP00000301838,9606.ENSP00000306124,9606.ENSP00000312455,9606.ENSP00000314420,9606.ENSP00000321026,9606.ENSP00000341874,9606.ENSP00000349596,9606.ENSP00000351416,9606.ENSP00000351789,…	SIRT1,RIPK2,TICAM1,RIPK1,BRD4,BIRC3,TNFRSF10B,REL,F2RL1,TERF2IP,FADD,PRKCE,CFLAR,PER1,LURAP1L,RIOK3,TRIM38,ANKRD17,PELI1,AKAP13,BTRC,CHUK,BCL10,ZC3H12A,PIM2,OPTN,TRIM5,SQSTM1,RELA,TLR6,TRAF6,OTUD7B,BIRC2,TNFAIP3,MAP3K14,IKBKG
GO:0040008	regulation of growth	97	663	0.21	0.00046	9606.ENSP00000158771,9606.ENSP00000212015,9606.ENSP00000216037,9606.ENSP00000227322,9606.ENSP00000228606,9606.ENSP00000228872,9606.ENSP00000230990,9606.ENSP00000235382,9606.ENSP00000252809,9606.ENSP00000253063,9606.ENSP00000254810,9606.ENSP00000256015,9606.ENSP00000260130,9606.ENSP00000261918,9606.ENSP00000262198,9606.ENSP00000263062,9606.ENSP00000263847,9606.ENSP00000263980,9606.ENSP00000264198,…	DERL2,SIRT1,XBP1,ZPR1,CYP27B1,CDKN1B,HBEGF,RGS2,GDF15,SESN2,H3F3B,BTG1,SDCBP,SEMA7A,ADNP2,EPC1,OSBP,SLC9A1,MUL1,LEF1,FSTL4,SRF,NRP1,GAL,EAF2,LRP12,PAK1,NIPBL,FLCN,PPARG,STAT5B,CRK,SLC25A33,ADAM17,CRLF3,PHLDA2,DCUN1D3,SERTAD3,TNFRSF12A,CSF1,SOCS3,SMAD3,NDEL1,KCTD21,SFN,JARID2,CREB3,NET1,KCTD6,GOLGA4,ADIPOR2,SUPV3L1,MAP2,ENPP1,SMURF1,INO80,OSGIN1,DUSP10,PROX1,BLZF1,SGK1,CTGF,ADRB1,MRGBP,TNKS2,PIM1,…
GO:0031331	positive regulation of cellular catabolic process	59	343	0.28	0.00047	9606.ENSP00000157812,9606.ENSP00000171111,9606.ENSP00000212015,9606.ENSP00000216037,9606.ENSP00000216117,9606.ENSP00000220751,9606.ENSP00000229416,9606.ENSP00000248244,9606.ENSP00000253063,9606.ENSP00000264198,9606.ENSP00000274289,9606.ENSP00000281708,9606.ENSP00000285071,9606.ENSP00000287437,9606.ENSP00000290551,9606.ENSP00000298552,9606.ENSP00000304051,9606.ENSP00000312150,9606.ENSP00000313391,…	PSMC4,KEAP1,SIRT1,XBP1,HMOX1,RIPK2,GCLC,TICAM1,SESN2,MUL1,PLK2,FBXW7,FLCN,NSMCE2,BTG2,TSC1,RNF139,TRIB1,DAB2,ZFAND2A,CLU,RCHY1,RAB12,CAV1,NRD1,WAC,UVRAG,ARIH2,ARNT,VCP,SUPV3L1,SMURF1,PTPN1,LONRF3,PLK3,ZC3H12A,RNF19B,TP53INP2,PIM2,PIP4K2A,OPTN,PRR5L,NFE2L2,LONRF1,RDX,SH3BP4,GIGYF2,ABHD5,NANOS1,PNPT1,HERPUD1,TOB1,PFKFB3,LDLR,ZFP36,ITCH,TNFAIP3,C9orf72,IKBKG
GO:0008219	cell death	143	1080	0.17	0.00051	9606.ENSP00000064780,9606.ENSP00000164227,9606.ENSP00000179259,9606.ENSP00000200453,9606.ENSP00000202556,9606.ENSP00000212015,9606.ENSP00000215631,9606.ENSP00000216037,9606.ENSP00000216117,9606.ENSP00000216797,9606.ENSP00000220751,9606.ENSP00000225174,9606.ENSP00000226574,9606.ENSP00000227322,9606.ENSP00000228515,9606.ENSP00000228872,9606.ENSP00000229416,9606.ENSP00000231668,9606.ENSP00000234420,…	RELT,BCL3,C12orf5,PPP1R15A,PPP1R13B,SIRT1,GADD45B,XBP1,HMOX1,NFKBIA,RIPK2,PPIF,NFKB1,ZPR1,CSRNP2,CDKN1B,GCLC,BNIP1,MSH6,TMEM214,IRF1,TNFSF9,PLAGL2,TICAM1,EGLN3,RAF1,RRP8,RIPK1,IER3,BCL2L10,ACIN1,C19orf10,IL1A,BIRC3,SLC9A1,MUL1,ALS2,FOSL2,LEF1,PHLDA1,KRT10,EMP3,MEF2D,RHOB,CSRNP1,EAF2,TNFRSF10B,PAK1,SLC25A4,SH3RF1,FADD,IL12A,CEBPB,PRKCE,DDIT4,ZNF622,TNFRSF10D,CFLAR,DAB2,CLU,STK17A,PHLDA2,SIAH2,HSPA…
GO:0007249	I-kappaB kinase/NF-kappaB signaling	21	70	0.52	0.00053	9606.ENSP00000164227,9606.ENSP00000216797,9606.ENSP00000220751,9606.ENSP00000221452,9606.ENSP00000226574,9606.ENSP00000248244,9606.ENSP00000256458,9606.ENSP00000259808,9606.ENSP00000263464,9606.ENSP00000295025,9606.ENSP00000296215,9606.ENSP00000354911,9606.ENSP00000358983,9606.ENSP00000359424,9606.ENSP00000359612,9606.ENSP00000393785,9606.ENSP00000433623,9606.ENSP00000441543,9606.ENSP00000477613,…	BCL3,NFKBIA,RIPK2,RELB,NFKB1,TICAM1,IRAK2,RIPK1,BIRC3,REL,SNIP1,TIFA,NFKB2,CHUK,BCL10,NKIRAS1,TRAF6,UBC,BIRC2,MAP3K14,IKBKG
GO:0031669	cellular response to nutrient levels	41	206	0.34	0.00055	9606.ENSP00000212015,9606.ENSP00000215904,9606.ENSP00000216037,9606.ENSP00000216117,9606.ENSP00000253063,9606.ENSP00000254605,9606.ENSP00000256383,9606.ENSP00000262039,9606.ENSP00000264832,9606.ENSP00000265354,9606.ENSP00000266458,9606.ENSP00000276925,9606.ENSP00000287820,9606.ENSP00000297991,9606.ENSP00000298552,9606.ENSP00000299767,9606.ENSP00000304004,9606.ENSP00000306682,9606.ENSP00000307235,…	SIRT1,PDXP,XBP1,HMOX1,SESN2,RRP8,EIF2S1,PIK3C3,ICAM1,SRF,GABARAPL1,CDKN2B,PPARG,AQP3,TSC1,HSP90B1,FOXA3,PPM1D,EIF2AK3,TBL2,SSH1,HSPA5,PMAIP1,UPP1,CAV1,MIOS,ATF3,P2RX4,NUAK2,JUN,RRAGC,ZC3H12A,PIM1,NFE2L2,MTMR3,CDKN1A,ATP2B1,CADPS2,FNIP1,ZFYVE1,BHLHA15
GO:0032496	response to lipopolysaccharide	53	298	0.3	0.00056	9606.ENSP00000064780,9606.ENSP00000216037,9606.ENSP00000216797,9606.ENSP00000220751,9606.ENSP00000223095,9606.ENSP00000226574,9606.ENSP00000227752,9606.ENSP00000228606,9606.ENSP00000248244,9606.ENSP00000252818,9606.ENSP00000254066,9606.ENSP00000256458,9606.ENSP00000257787,9606.ENSP00000264832,9606.ENSP00000269701,9606.ENSP00000276431,9606.ENSP00000280614,9606.ENSP00000281092,9606.ENSP00000296026,…	RELT,XBP1,NFKBIA,RIPK2,SERPINE1,NFKB1,IL10RA,CYP27B1,TICAM1,JUND,RARA,IRAK2,AKIRIN2,ICAM1,AKAP8,TNFRSF10B,CCRN4L,FER,CXCL3,CXCL5,IL12A,JUNB,CEBPB,PRKCE,FOS,CXCL8,ADAM17,TNFRSF10D,TRIB1,NFKBIB,PDE4B,PELI1,CTR9,DUSP10,NFKB2,CHUK,ABCC2,JUN,ANKRD1,ZC3H12A,PTAFR,EDN1,CXCL1,VIMP,RELA,CXCL2,TRAF6,ADM,ATP2A2,LITAF,ZFP36,TNFRSF9,TNFAIP3
GO:0007030	Golgi organization	25	95	0.47	0.00056	9606.ENSP00000163416,9606.ENSP00000234160,9606.ENSP00000258654,9606.ENSP00000262225,9606.ENSP00000265070,9606.ENSP00000267622,9606.ENSP00000294179,9606.ENSP00000311336,9606.ENSP00000319169,9606.ENSP00000330945,9606.ENSP00000331487,9606.ENSP00000346139,9606.ENSP00000356782,9606.ENSP00000358071,9606.ENSP00000359665,9606.ENSP00000360183,9606.ENSP00000361057,9606.ENSP00000361275,9606.ENSP00000361522,…	GOLGA5,GORASP2,COG3,TMED2,GOLPH3,TRIP11,STX5,ATP8B3,PRMT5,TMED9,NPLOC4,TBC1D20,BLZF1,SEC23IP,PI4K2A,STX16,SURF4,PLK3,TJAP1,PLEKHM2,OPTN,GOLGB1,RAB30,USO1,BHLHA15
GO:0032527	protein exit from endoplasmic reticulum	11	19	0.81	0.0006	9606.ENSP00000158771,9606.ENSP00000260643,9606.ENSP00000261942,9606.ENSP00000263202,9606.ENSP00000299767,9606.ENSP00000331487,9606.ENSP00000351777,9606.ENSP00000366395,9606.ENSP00000381237,9606.ENSP00000381282,9606.ENSP00000409555	DERL2,PREB,FAF2,UFD1L,HSP90B1,NPLOC4,VCP,SYVN1,HM13,VIMP,HERPUD1
GO:0010498	proteasomal protein catabolic process	51	284	0.3	0.00064	9606.ENSP00000157812,9606.ENSP00000158771,9606.ENSP00000171111,9606.ENSP00000185150,9606.ENSP00000209884,9606.ENSP00000212015,9606.ENSP00000219313,9606.ENSP00000237455,9606.ENSP00000242719,9606.ENSP00000248958,9606.ENSP00000249356,9606.ENSP00000256257,9606.ENSP00000259335,9606.ENSP00000261942,9606.ENSP00000263202,9606.ENSP00000280758,9606.ENSP00000281708,9606.ENSP00000299767,9606.ENSP00000301738,…	PSMC4,DERL2,KEAP1,ERLEC1,KLHL20,SIRT1,PSMD7,RNF103,RNF11,SDF2L1,DNAJB9,RNF122,KIAA0368,FAF2,UFD1L,BTBD11,FBXW7,HSP90B1,KCTD5,RNF139,RNF181,FBXO45,KCTD2,KLHL11,HSPA5,PMAIP1,YOD1,NPLOC4,RNF41,UBE2H,TRIM38,VCP,TOPORS,SMURF1,BTRC,SYVN1,NFE2L2,HM13,VIMP,NEDD4L,UBE2J2,PSME4,ARNTL,HERPUD1,ABTB2,UBC,DDIT3,RNF111,RNF115,BIRC2,ITCH
GO:0031400	negative regulation of protein modification process	88	592	0.22	0.00066	9606.ENSP00000014914,9606.ENSP00000200453,9606.ENSP00000212015,9606.ENSP00000215631,9606.ENSP00000216037,9606.ENSP00000228872,9606.ENSP00000229416,9606.ENSP00000235382,9606.ENSP00000239223,9606.ENSP00000249075,9606.ENSP00000252992,9606.ENSP00000254657,9606.ENSP00000262384,9606.ENSP00000276925,9606.ENSP00000283228,9606.ENSP00000284273,9606.ENSP00000285071,9606.ENSP00000287878,9606.ENSP00000287936,…	GPRC5A,PPP1R15A,SIRT1,GADD45B,XBP1,CDKN1B,GCLC,RGS2,DUSP1,LIF,CEP85,PER2,N4BP1,CDKN2B,PTPRR,UBASH3B,FLCN,PRKAG2,HMGCR,DUSP2,SENP2,F2RL1,DUSP16,TERF2IP,IBTK,PRKCE,YWHAG,DDIT4,BOD1,TRIB1,PER1,PIBF1,HSPH1,PINX1,SUPT6H,SOCS3,CAV1,SFN,JARID2,ATF3,PMEPA1,KIRREL,ADARB1,ENPP1,PPP1R14C,DUSP10,PPP1R15B,EFNA1,EIF3A,DUSP5,GADD45A,JUN,PPAP2B,PTPN1,ZC3H12A,DKK1,BAK1,KLF4,HSPA1B,SPRY2,ERRFI1,FLRT3,PRR5L,XDH,GPS…
GO:0001933	negative regulation of protein phosphorylation	68	422	0.25	0.00066	9606.ENSP00000014914,9606.ENSP00000212015,9606.ENSP00000215631,9606.ENSP00000216037,9606.ENSP00000228872,9606.ENSP00000235382,9606.ENSP00000239223,9606.ENSP00000249075,9606.ENSP00000252992,9606.ENSP00000276925,9606.ENSP00000283228,9606.ENSP00000284273,9606.ENSP00000285071,9606.ENSP00000287878,9606.ENSP00000287936,9606.ENSP00000288943,9606.ENSP00000296677,9606.ENSP00000298573,9606.ENSP00000300086,…	GPRC5A,SIRT1,GADD45B,XBP1,CDKN1B,RGS2,DUSP1,LIF,CEP85,CDKN2B,PTPRR,UBASH3B,FLCN,PRKAG2,HMGCR,DUSP2,F2RL1,DUSP16,TERF2IP,IBTK,YWHAG,DDIT4,TRIB1,PER1,PIBF1,HSPH1,SOCS3,CAV1,SFN,ATF3,PMEPA1,KIRREL,ADARB1,ENPP1,DUSP10,PPP1R15B,EFNA1,EIF3A,DUSP5,GADD45A,JUN,PPAP2B,PTPN1,ZC3H12A,DKK1,BAK1,KLF4,SPRY2,ERRFI1,FLRT3,PRR5L,XDH,GPS2,IGFBP3,LATS2,SH3BP5,DUSP8,CDKN1A,NCK1,PPP2CA,BDKRB2,DNAJC3,CNKSR3,DUSP14,ITC…
GO:0062012	regulation of small molecule metabolic process	57	332	0.28	0.00066	9606.ENSP00000179259,9606.ENSP00000212015,9606.ENSP00000225174,9606.ENSP00000226574,9606.ENSP00000228606,9606.ENSP00000230361,9606.ENSP00000234111,9606.ENSP00000239938,9606.ENSP00000244050,9606.ENSP00000245787,9606.ENSP00000253063,9606.ENSP00000254101,9606.ENSP00000265896,9606.ENSP00000270162,9606.ENSP00000285071,9606.ENSP00000287820,9606.ENSP00000287878,9606.ENSP00000287936,9606.ENSP00000294312,…	C12orf5,SIRT1,PPIF,NFKB1,CYP27B1,GUCA1B,ODC1,EGR1,SNAI1,INSIG2,SESN2,PRKAB2,SQLE,SIK1,FLCN,PPARG,PRKAG2,HMGCR,FGF19,MIDN,ADORA2B,PRKCE,SLC25A33,DDIT4,PPP1R3B,PDE12,PANK2,PIBF1,PHLDA2,HMGCS1,PMAIP1,PDGFB,CAV1,INSIG1,NFYA,DHCR7,ADIPOR2,ARNT,VCP,ENPP1,PROX1,DUSP12,SORBS1,PTAFR,BMP2,IGFBP3,PDP1,HRH1,VIMP,GRB10,PFKFB3,MVK,LDLR,OAZ1,SEC14L2,CLTC,NR4A3
GO:0022613	ribonucleoprotein complex biogenesis	66	409	0.25	0.00083	9606.ENSP00000198767,9606.ENSP00000199320,9606.ENSP00000212015,9606.ENSP00000224140,9606.ENSP00000230340,9606.ENSP00000244230,9606.ENSP00000254605,9606.ENSP00000256383,9606.ENSP00000258243,9606.ENSP00000261708,9606.ENSP00000265245,9606.ENSP00000268483,9606.ENSP00000272348,9606.ENSP00000272645,9606.ENSP00000275820,9606.ENSP00000280614,9606.ENSP00000283109,9606.ENSP00000296792,9606.ENSP00000297990,…	RRN3,DIMT1,SIRT1,SETX,BYSL,MPHOSPH10,RRP8,EIF2S1,URB2,UTP6,LSG1,TXNL4B,SNRPG,POLR2D,NOM1,CCRN4L,RIOK2,UTP15,NOL6,TSC1,TSR1,ISG20,WDR3,UTP23,ZNF622,WDR75,PRPF3,PRMT5,EDC3,RRS1,RPUSD2,ISG20L2,CIRH1A,YTHDC1,RIOK3,CPSF7,PRPF39,DYNC1H1,WDR37,WDR55,LTV1,KIAA0907,EIF3A,MDN1,PDCD11,PTBP2,DDX31,AGO3,AAR2,ZNF593,TEX10,PAK1IP1,RIOK1,SMN1,TAF9,NOP2,UTP14A,ATXN2L,SETD4,WDR43,CHD7,EXOSC6,CLP1,CELF1,NOL8,C9orf72
GO:0042176	regulation of protein catabolic process	61	368	0.26	0.00084	9606.ENSP00000157812,9606.ENSP00000158771,9606.ENSP00000171111,9606.ENSP00000185150,9606.ENSP00000216037,9606.ENSP00000216085,9606.ENSP00000228872,9606.ENSP00000229416,9606.ENSP00000234111,9606.ENSP00000260130,9606.ENSP00000262384,9606.ENSP00000264639,9606.ENSP00000274289,9606.ENSP00000281708,9606.ENSP00000287437,9606.ENSP00000294179,9606.ENSP00000304051,9606.ENSP00000305790,9606.ENSP00000312150,…	PSMC4,DERL2,KEAP1,ERLEC1,XBP1,RHBDD3,CDKN1B,GCLC,ODC1,SDCBP,N4BP1,PSMD3,PLK2,FBXW7,NSMCE2,STX5,RNF139,SF3B3,TRIB1,DAB2,ZFAND2A,CLU,TLK2,RCHY1,YOD1,SMAD3,CAV1,RNF41,NRD1,WAC,ARIH2,MYLIP,VCP,DDA1,SMURF1,LRIG2,EFNA1,BTRC,LONRF3,PLK3,RNF19B,TRIM39,TAF9,NFE2L2,LONRF1,TMF1,USP25,NEDD4L,RDX,RELA,ARNTL,HERPUD1,RIC1,RYBP,TIPARP,SH3RF2,LDLR,EGLN2,OAZ1,ITCH,TNFAIP3
GO:0045934	negative regulation of nucleobase-containing compound metabolic process	178	1424	0.14	0.00086	9606.ENSP00000157600,9606.ENSP00000164227,9606.ENSP00000179259,9606.ENSP00000209728,9606.ENSP00000212015,9606.ENSP00000216037,9606.ENSP00000221452,9606.ENSP00000222329,9606.ENSP00000225174,9606.ENSP00000225688,9606.ENSP00000226574,9606.ENSP00000228872,9606.ENSP00000229416,9606.ENSP00000234198,9606.ENSP00000234420,9606.ENSP00000239223,9606.ENSP00000239938,9606.ENSP00000242728,9606.ENSP00000244050,…	LMCD1,BCL3,C12orf5,CDC6,SIRT1,XBP1,RELB,ERF,PPIF,RASD1,NFKB1,CDKN1B,GCLC,DLX2,MSH6,DUSP1,EGR1,BHLHE41,SNAI1,EREG,IRF1,FOSB,DLL4,JUND,RARA,THAP1,DNAJB1,RRP8,PER2,H3F3B,MBD2,BHLHE40,TBX3,BACH2,AKIRIN2,HUS1,USP2,TRIM37,ACIN1,EPC1,MXD1,LEF1,SRF,CREM,BTAF1,JDP2,CCRN4L,FBXW7,NIPBL,FLCN,PPARG,BTG2,ZNF281,REL,MITF,NFIL3,TERF2IP,RUNX1,JUNB,LRP8,CEBPB,PPM1D,DDIT4,ZBTB5,ZNF608,ZNF239,MEPCE,ZNF431,PDE12,NR1D…
GO:0030970	retrograde protein transport, ER to cytosol	10	16	0.84	0.00088	9606.ENSP00000158771,9606.ENSP00000261942,9606.ENSP00000263202,9606.ENSP00000299767,9606.ENSP00000331487,9606.ENSP00000351777,9606.ENSP00000366395,9606.ENSP00000381237,9606.ENSP00000381282,9606.ENSP00000409555	DERL2,FAF2,UFD1L,HSP90B1,NPLOC4,VCP,SYVN1,HM13,VIMP,HERPUD1
GO:0009967	positive regulation of signal transduction	185	1493	0.14	0.00091	9606.ENSP00000013125,9606.ENSP00000056217,9606.ENSP00000157600,9606.ENSP00000202556,9606.ENSP00000212015,9606.ENSP00000215631,9606.ENSP00000216037,9606.ENSP00000216373,9606.ENSP00000220751,9606.ENSP00000222812,9606.ENSP00000225174,9606.ENSP00000226574,9606.ENSP00000228606,9606.ENSP00000230990,9606.ENSP00000244869,9606.ENSP00000246229,9606.ENSP00000248244,9606.ENSP00000249075,9606.ENSP00000249749,…	MAP4K5,ARHGEF5,LMCD1,PPP1R13B,SIRT1,GADD45B,XBP1,SOS2,RIPK2,STX1A,PPIF,NFKB1,CYP27B1,HBEGF,EREG,PLAGL2,TICAM1,LIF,DLL4,RAF1,GDF15,JAG1,MBD2,IRAK2,RIPK1,SDCBP,THBS1,SEMA7A,SPAG9,NLRC5,C19orf10,MAP3K8,BRD4,BIRC3,ACVR1,MAP4K3,SLC9A1,MUL1,ALS2,RAPGEF2,IL11,DNAJC27,ICAM1,MAP3K13,GOLPH3,NRP1,GAREM,PELO,TNFRSF10B,CDKN2B,PAK1,FBXW7,SH3RF1,FLCN,HMGCR,BRAF,ITGA5,FGF19,REL,TGFA,F2RL1,TERF2IP,CRK,FADD,IL12A,…
GO:0012501	programmed cell death	137	1042	0.16	0.00097	9606.ENSP00000064780,9606.ENSP00000164227,9606.ENSP00000179259,9606.ENSP00000200453,9606.ENSP00000202556,9606.ENSP00000212015,9606.ENSP00000215631,9606.ENSP00000216037,9606.ENSP00000216117,9606.ENSP00000216797,9606.ENSP00000220751,9606.ENSP00000225174,9606.ENSP00000226574,9606.ENSP00000227322,9606.ENSP00000228515,9606.ENSP00000228872,9606.ENSP00000229416,9606.ENSP00000231668,9606.ENSP00000234420,…	RELT,BCL3,C12orf5,PPP1R15A,PPP1R13B,SIRT1,GADD45B,XBP1,HMOX1,NFKBIA,RIPK2,PPIF,NFKB1,ZPR1,CSRNP2,CDKN1B,GCLC,BNIP1,MSH6,TMEM214,IRF1,TNFSF9,PLAGL2,TICAM1,EGLN3,RAF1,RRP8,RIPK1,IER3,BCL2L10,ACIN1,C19orf10,IL1A,BIRC3,MUL1,LEF1,PHLDA1,KRT10,MEF2D,RHOB,CSRNP1,EAF2,TNFRSF10B,PAK1,SLC25A4,SH3RF1,FADD,IL12A,CEBPB,PRKCE,DDIT4,ZNF622,TNFRSF10D,CFLAR,DAB2,CLU,STK17A,PHLDA2,SIAH2,HSPA5,PMAIP1,TNFRSF12A,AEN,…
GO:1902533	positive regulation of intracellular signal transduction	128	959	0.17	0.00097	9606.ENSP00000013125,9606.ENSP00000056217,9606.ENSP00000157600,9606.ENSP00000212015,9606.ENSP00000215631,9606.ENSP00000216037,9606.ENSP00000216373,9606.ENSP00000220751,9606.ENSP00000230990,9606.ENSP00000244869,9606.ENSP00000246229,9606.ENSP00000248244,9606.ENSP00000249075,9606.ENSP00000251849,9606.ENSP00000252809,9606.ENSP00000256458,9606.ENSP00000259808,9606.ENSP00000260130,9606.ENSP00000260356,…	MAP4K5,ARHGEF5,LMCD1,SIRT1,GADD45B,XBP1,SOS2,RIPK2,HBEGF,EREG,PLAGL2,TICAM1,LIF,RAF1,GDF15,IRAK2,RIPK1,SDCBP,THBS1,SEMA7A,SPAG9,C19orf10,MAP3K8,BRD4,BIRC3,MAP4K3,SLC9A1,MUL1,ALS2,RAPGEF2,IL11,DNAJC27,ICAM1,MAP3K13,GOLPH3,NRP1,GAREM,TNFRSF10B,PAK1,FBXW7,SH3RF1,FLCN,HMGCR,BRAF,FGF19,REL,TGFA,F2RL1,TERF2IP,CRK,FADD,IL12A,ADORA2B,PRKCE,CLCF1,ZNF622,CFLAR,CLU,DVL3,PIBF1,CRLF3,MALT1,CALR,LURAP1L,KARS,P…
GO:0042127	regulation of cell population proliferation	195	1594	0.13	0.001	9606.ENSP00000064780,9606.ENSP00000158771,9606.ENSP00000209728,9606.ENSP00000212015,9606.ENSP00000216037,9606.ENSP00000216117,9606.ENSP00000216420,9606.ENSP00000216797,9606.ENSP00000220751,9606.ENSP00000222553,9606.ENSP00000228606,9606.ENSP00000228872,9606.ENSP00000230990,9606.ENSP00000234111,9606.ENSP00000239223,9606.ENSP00000239938,9606.ENSP00000244869,9606.ENSP00000245414,9606.ENSP00000245817,…	RELT,DERL2,CDC6,SIRT1,XBP1,HMOX1,CGRRF1,NFKBIA,RIPK2,NAMPT,CYP27B1,CDKN1B,HBEGF,ODC1,DUSP1,EGR1,EREG,IRF1,TNFSF9,TICAM1,LIF,DLL4,EGLN3,RAF1,JUND,RARA,PER2,JAG1,BTG1,MBD2,TBX3,AKIRIN2,TBRG4,SDCBP,THBS1,CCND2,LHX5,C19orf10,IL1A,RAPGEF2,IL11,FOSL2,PPAP2A,NPR3,LEF1,SRF,NRP1,GAL,GAREM,EMP3,MEF2D,FTH1,EAF2,TNFRSF10B,CDKN2B,PAK1,FER,FBXW7,SH3RF1,FLCN,PPARG,HMGCR,BTG2,STAT5B,FGF19,TGFA,MITF,EIF5A2,CXCL3,…
GO:0009057	macromolecule catabolic process	129	970	0.17	0.001	9606.ENSP00000157812,9606.ENSP00000158771,9606.ENSP00000171111,9606.ENSP00000185150,9606.ENSP00000209884,9606.ENSP00000212015,9606.ENSP00000216037,9606.ENSP00000217402,9606.ENSP00000219313,9606.ENSP00000227322,9606.ENSP00000237455,9606.ENSP00000237642,9606.ENSP00000242719,9606.ENSP00000247977,9606.ENSP00000248958,9606.ENSP00000249356,9606.ENSP00000252015,9606.ENSP00000256257,9606.ENSP00000259335,…	PSMC4,DERL2,KEAP1,ERLEC1,KLHL20,SIRT1,XBP1,CHMP4B,PSMD7,ZPR1,RNF103,STBD1,RNF11,FBXL12,SDF2L1,DNAJB9,TRPC4AP,RNF122,KIAA0368,RIPK1,USP2,PSMD11,FAF2,UFD1L,SLC9A1,PSMD3,POLR2D,PELO,CCRN4L,BTBD11,FBXW7,USP12,TMEM199,UBAP1,HSP90B1,KCTD5,RNF139,ISG20,RNF181,PDE12,FBXO45,KCTD2,RNASEH1,KLHL11,ZHX2,TOLLIP,CLU,RBBP6,VPS37A,EDC3,RNF168,RCHY1,SIAH2,HSPA5,PPP2R2A,PMAIP1,YOD1,CLN8,NPLOC4,RAB12,DHX34,KLHL25,PN…
GO:0051272	positive regulation of cellular component movement	74	482	0.23	0.0011	9606.ENSP00000212015,9606.ENSP00000216037,9606.ENSP00000216117,9606.ENSP00000223095,9606.ENSP00000230990,9606.ENSP00000244050,9606.ENSP00000256398,9606.ENSP00000260130,9606.ENSP00000260356,9606.ENSP00000262013,9606.ENSP00000262498,9606.ENSP00000263339,9606.ENSP00000263640,9606.ENSP00000264036,9606.ENSP00000264431,9606.ENSP00000264832,9606.ENSP00000265165,9606.ENSP00000265371,9606.ENSP00000272233,…	SIRT1,XBP1,HMOX1,SERPINE1,HBEGF,SNAI1,ELP3,SDCBP,THBS1,SPAG9,CFAP20,IL1A,ACVR1,MCAM,RAPGEF2,ICAM1,LEF1,NRP1,RHOB,PLK2,PAK1,FER,NIPBL,ITGA5,CXCL3,CXCL5,F2RL1,CRK,FADD,IL12A,PRKCE,CXCL8,ADAM17,DAB2,SSH1,ZNF609,CALR,HSPA5,KARS,CSF1,PDGFB,SMAD3,CREB3,MAP2K3,PDGFA,PTRF,P2RX4,MAP2,NOS1AP,PROX1,DDR2,IL6R,NUS1,JUN,PPAP2B,PLAU,ZC3H12A,PTAFR,SPRY2,BMP2,EDN1,GCNT2,CD274,GPNMB,FGFBP1,ETS1,CXCL1,NFE2L2,RDX,BC…
GO:0001819	positive regulation of cytokine production	63	390	0.25	0.0011	9606.ENSP00000164227,9606.ENSP00000216037,9606.ENSP00000216117,9606.ENSP00000220751,9606.ENSP00000223095,9606.ENSP00000226574,9606.ENSP00000232496,9606.ENSP00000239938,9606.ENSP00000244869,9606.ENSP00000245414,9606.ENSP00000248244,9606.ENSP00000254066,9606.ENSP00000257787,9606.ENSP00000259808,9606.ENSP00000260356,9606.ENSP00000261918,9606.ENSP00000263339,9606.ENSP00000293328,9606.ENSP00000296677,…	BCL3,XBP1,HMOX1,RIPK2,SERPINE1,NFKB1,TUSC2,EGR1,EREG,IRF1,TICAM1,RARA,AKIRIN2,RIPK1,THBS1,SEMA7A,IL1A,STAT5B,F2RL1,RUNX1,FADD,IL12A,ADORA2B,CEBPB,EIF2AK3,ADAM17,HEG1,CLU,PIBF1,MALT1,KARS,PDE4B,SMAD3,POLR3C,RIOK3,ARNT,ANKRD17,PELI1,IL6R,NFKB2,CHUK,BCL10,POLR3A,PTAFR,HSPA1B,HLA-E,CD83,RGCC,DDX58,CD274,RSAD2,IL4R,POLR3D,MBP,TMF1,RELA,CREB1,TLR6,FAM49B,TRAF6,DDIT3,TRIM16,NR4A3
GO:0071902	positive regulation of protein serine/threonine kinase activity	57	340	0.27	0.0011	9606.ENSP00000013125,9606.ENSP00000056217,9606.ENSP00000209728,9606.ENSP00000212015,9606.ENSP00000215631,9606.ENSP00000220751,9606.ENSP00000228872,9606.ENSP00000251849,9606.ENSP00000252809,9606.ENSP00000256458,9606.ENSP00000259808,9606.ENSP00000260356,9606.ENSP00000261254,9606.ENSP00000262013,9606.ENSP00000263056,9606.ENSP00000263881,9606.ENSP00000264157,9606.ENSP00000264198,9606.ENSP00000264276,…	MAP4K5,ARHGEF5,CDC6,SIRT1,GADD45B,RIPK2,CDKN1B,RAF1,GDF15,IRAK2,RIPK1,THBS1,CCND2,SPAG9,MAP3K8,MAP4K3,CCNT2,MUL1,ALS2,RAPGEF2,MAP3K13,PAK1,BRAF,TGFA,CCNL1,CRK,ADORA2B,ADAM17,DVL3,KARS,PDGFB,SPDYA,MAP2K3,PDGFA,AKAP13,PROX1,PEA15,DUSP5,AVPI1,GADD45A,PTPN1,PIM1,DKK1,DAXX,SPRY2,BMP2,RGCC,EDN1,TLR6,MAP2K4,PPP2CA,CSB-PGBD3,TRAF6,UBC,MAP3K9,MAP3K14,IKBKG
GO:0051403	stress-activated MAPK cascade	26	107	0.43	0.0011	9606.ENSP00000013125,9606.ENSP00000220751,9606.ENSP00000226574,9606.ENSP00000256458,9606.ENSP00000259808,9606.ENSP00000262013,9606.ENSP00000263056,9606.ENSP00000263881,9606.ENSP00000264198,9606.ENSP00000265026,9606.ENSP00000304501,9606.ENSP00000312150,9606.ENSP00000345083,9606.ENSP00000359206,9606.ENSP00000359424,9606.ENSP00000360683,9606.ENSP00000363668,9606.ENSP00000370104,9606.ENSP00000410402,…	MAP4K5,RIPK2,NFKB1,IRAK2,RIPK1,SPAG9,MAP3K8,MAP4K3,MUL1,MAP3K13,ADORA2B,TRIB1,MAP2K3,BTRC,CHUK,PTPN1,DAXX,GPS2,MAP2K4,CSB-PGBD3,CRYAB,TRAF6,UBC,MAP3K9,ZFP36,IKBKG
GO:0070498	interleukin-1-mediated signaling pathway	17	51	0.57	0.0011	9606.ENSP00000216797,9606.ENSP00000220751,9606.ENSP00000226574,9606.ENSP00000239938,9606.ENSP00000256458,9606.ENSP00000263056,9606.ENSP00000263339,9606.ENSP00000314733,9606.ENSP00000351789,9606.ENSP00000359206,9606.ENSP00000359424,9606.ENSP00000374455,9606.ENSP00000384273,9606.ENSP00000433623,9606.ENSP00000441543,9606.ENSP00000479667,9606.ENSP00000483825	NFKBIA,RIPK2,NFKB1,EGR1,IRAK2,MAP3K8,IL1A,TOLLIP,PELI1,BTRC,CHUK,SQSTM1,RELA,TRAF6,UBC,RPS6KA5,IKBKG
GO:0038061	NIK/NF-kappaB signaling	14	35	0.65	0.0011	9606.ENSP00000221452,9606.ENSP00000226574,9606.ENSP00000263464,9606.ENSP00000276431,9606.ENSP00000279387,9606.ENSP00000295025,9606.ENSP00000319279,9606.ENSP00000358983,9606.ENSP00000359206,9606.ENSP00000359424,9606.ENSP00000389600,9606.ENSP00000433623,9606.ENSP00000477613,9606.ENSP00000482657	RELB,NFKB1,BIRC3,TNFRSF10B,PPP4C,REL,MALT1,NFKB2,BTRC,CHUK,TLR6,TRAF6,BIRC2,MAP3K14
GO:0051240	positive regulation of multicellular organismal process	190	1551	0.13	0.0012	9606.ENSP00000164227,9606.ENSP00000198767,9606.ENSP00000212015,9606.ENSP00000216037,9606.ENSP00000216117,9606.ENSP00000220751,9606.ENSP00000222812,9606.ENSP00000223095,9606.ENSP00000224140,9606.ENSP00000226574,9606.ENSP00000228606,9606.ENSP00000230990,9606.ENSP00000232496,9606.ENSP00000234198,9606.ENSP00000234420,9606.ENSP00000235382,9606.ENSP00000239938,9606.ENSP00000240874,9606.ENSP00000244050,…	BCL3,RRN3,SIRT1,XBP1,HMOX1,RIPK2,STX1A,SERPINE1,SETX,NFKB1,CYP27B1,HBEGF,TUSC2,DLX2,MSH6,RGS2,EGR1,KALRN,SNAI1,EREG,IRF1,TNFSF9,TICAM1,LIF,JUND,NUMBL,RARA,JAG1,BTG1,AKIRIN2,RIPK1,SDCBP,THBS1,LIPG,LHX5,MAPK6,SEMA7A,SPAG9,ACIN1,C19orf10,IL1A,ACVR1,SLC9A1,MUL1,RAPGEF2,ICAM1,LEF1,SRF,NRP1,GAL,RHOB,PLK2,PAK1,NIPBL,CA2,PPARG,HMGCR,STAT5B,ITGA5,F2RL1,RUNX1,FADD,IL12A,LRP8,ADORA2B,CEBPB,PRKCE,FOS,CXCL8,E…
GO:0045892	negative regulation of transcription, DNA-templated	150	1169	0.15	0.0012	9606.ENSP00000157600,9606.ENSP00000164227,9606.ENSP00000212015,9606.ENSP00000216037,9606.ENSP00000221452,9606.ENSP00000222329,9606.ENSP00000225688,9606.ENSP00000226574,9606.ENSP00000228872,9606.ENSP00000229416,9606.ENSP00000234198,9606.ENSP00000239938,9606.ENSP00000242728,9606.ENSP00000244050,9606.ENSP00000244869,9606.ENSP00000245414,9606.ENSP00000245919,9606.ENSP00000249749,9606.ENSP00000252818,…	LMCD1,BCL3,SIRT1,XBP1,RELB,ERF,RASD1,NFKB1,CDKN1B,GCLC,DLX2,EGR1,BHLHE41,SNAI1,EREG,IRF1,FOSB,DLL4,JUND,RARA,THAP1,DNAJB1,RRP8,PER2,H3F3B,MBD2,BHLHE40,TBX3,BACH2,AKIRIN2,USP2,TRIM37,EPC1,MXD1,LEF1,SRF,CREM,BTAF1,JDP2,NIPBL,FLCN,PPARG,BTG2,ZNF281,REL,MITF,NFIL3,RUNX1,JUNB,LRP8,CEBPB,PPM1D,ZBTB5,ZNF608,ZNF239,MEPCE,ZNF431,NR1D2,DAB2,PER1,ZHX2,SUPT6H,CALR,RNF168,YAF2,PDGFB,SMAD3,ZNF354A,ZNF202,OVOL1…
GO:0033674	positive regulation of kinase activity	82	553	0.22	0.0012	9606.ENSP00000013125,9606.ENSP00000056217,9606.ENSP00000179259,9606.ENSP00000209728,9606.ENSP00000212015,9606.ENSP00000215631,9606.ENSP00000220751,9606.ENSP00000228872,9606.ENSP00000239938,9606.ENSP00000244869,9606.ENSP00000251849,9606.ENSP00000252809,9606.ENSP00000256458,9606.ENSP00000259808,9606.ENSP00000260356,9606.ENSP00000261254,9606.ENSP00000262013,9606.ENSP00000263056,9606.ENSP00000263881,…	MAP4K5,ARHGEF5,C12orf5,CDC6,SIRT1,GADD45B,RIPK2,CDKN1B,EGR1,EREG,RAF1,GDF15,IRAK2,RIPK1,THBS1,CCND2,SPAG9,MAP3K8,MAP4K3,CCNT2,MUL1,ALS2,RAPGEF2,MAP3K13,MAPKAP1,TNFRSF10B,PAK1,FBXW7,PRKAG2,BRAF,TGFA,CCNL1,CRK,LRP8,ADORA2B,ADAM17,ZNF622,CLU,DVL3,PIBF1,HSPH1,MALT1,KARS,CSF1,PDGFB,SPDYA,MAP2K3,PDGFA,AKAP13,PROX1,DDR2,DUSP12,PEA15,EFNA1,IL6R,DUSP5,SLK,LMO4,AVPI1,GADD45A,PTPN1,SDC4,PIM1,DKK1,DAXX,SPRY2…
GO:0045860	positive regulation of protein kinase activity	78	517	0.22	0.0012	9606.ENSP00000013125,9606.ENSP00000056217,9606.ENSP00000209728,9606.ENSP00000212015,9606.ENSP00000215631,9606.ENSP00000220751,9606.ENSP00000228872,9606.ENSP00000239938,9606.ENSP00000244869,9606.ENSP00000251849,9606.ENSP00000252809,9606.ENSP00000256458,9606.ENSP00000259808,9606.ENSP00000260356,9606.ENSP00000261254,9606.ENSP00000262013,9606.ENSP00000263056,9606.ENSP00000263881,9606.ENSP00000264157,…	MAP4K5,ARHGEF5,CDC6,SIRT1,GADD45B,RIPK2,CDKN1B,EGR1,EREG,RAF1,GDF15,IRAK2,RIPK1,THBS1,CCND2,SPAG9,MAP3K8,MAP4K3,CCNT2,MUL1,ALS2,RAPGEF2,MAP3K13,MAPKAP1,TNFRSF10B,PAK1,FBXW7,PRKAG2,BRAF,TGFA,CCNL1,CRK,LRP8,ADORA2B,ADAM17,CLU,DVL3,PIBF1,HSPH1,MALT1,KARS,CSF1,PDGFB,SPDYA,MAP2K3,PDGFA,AKAP13,PROX1,DDR2,PEA15,EFNA1,IL6R,DUSP5,SLK,AVPI1,GADD45A,PTPN1,SDC4,PIM1,DKK1,DAXX,SPRY2,BMP2,RGCC,EDN1,NKX3-1,CDKN…
GO:0036498	IRE1-mediated unfolded protein response	17	52	0.56	0.0012	9606.ENSP00000216037,9606.ENSP00000222803,9606.ENSP00000249356,9606.ENSP00000260643,9606.ENSP00000262139,9606.ENSP00000262947,9606.ENSP00000314615,9606.ENSP00000323313,9606.ENSP00000324173,9606.ENSP00000328023,9606.ENSP00000360683,9606.ENSP00000364591,9606.ENSP00000364885,9606.ENSP00000366395,9606.ENSP00000378721,9606.ENSP00000418401,9606.ENSP00000473631	XBP1,FKBP14,DNAJB9,PREB,WIPI1,C19orf10,ARFGAP1,PDIA5,HSPA5,SRPR,PTPN1,TSPYL2,ZBTB17,SYVN1,SEC31A,SRPRB,DNAJC3
GO:1903507	negative regulation of nucleic acid-templated transcription	155	1220	0.15	0.0013	9606.ENSP00000157600,9606.ENSP00000164227,9606.ENSP00000212015,9606.ENSP00000216037,9606.ENSP00000221452,9606.ENSP00000222329,9606.ENSP00000225688,9606.ENSP00000226574,9606.ENSP00000228872,9606.ENSP00000229416,9606.ENSP00000234198,9606.ENSP00000239938,9606.ENSP00000242728,9606.ENSP00000244050,9606.ENSP00000244869,9606.ENSP00000245414,9606.ENSP00000245919,9606.ENSP00000249749,9606.ENSP00000252818,…	LMCD1,BCL3,SIRT1,XBP1,RELB,ERF,RASD1,NFKB1,CDKN1B,GCLC,DLX2,EGR1,BHLHE41,SNAI1,EREG,IRF1,FOSB,DLL4,JUND,RARA,THAP1,DNAJB1,RRP8,PER2,H3F3B,MBD2,BHLHE40,TBX3,BACH2,AKIRIN2,USP2,TRIM37,EPC1,MXD1,LEF1,SRF,CREM,BTAF1,JDP2,NIPBL,FLCN,PPARG,BTG2,ZNF281,REL,MITF,NFIL3,RUNX1,JUNB,LRP8,CEBPB,PPM1D,ZBTB5,ZNF608,ZNF239,MEPCE,ZNF431,NR1D2,DAB2,PER1,ZHX2,SUPT6H,PRMT5,CALR,RNF168,SIAH2,YAF2,PDGFB,SMAD3,ZNF354A,…
GO:0043408	regulation of MAPK cascade	100	712	0.19	0.0013	9606.ENSP00000013125,9606.ENSP00000056217,9606.ENSP00000215631,9606.ENSP00000216037,9606.ENSP00000220751,9606.ENSP00000235382,9606.ENSP00000239223,9606.ENSP00000249075,9606.ENSP00000251849,9606.ENSP00000252809,9606.ENSP00000256458,9606.ENSP00000259808,9606.ENSP00000260130,9606.ENSP00000260356,9606.ENSP00000261918,9606.ENSP00000262013,9606.ENSP00000262746,9606.ENSP00000262947,9606.ENSP00000263056,…	MAP4K5,ARHGEF5,GADD45B,XBP1,RIPK2,RGS2,DUSP1,LIF,RAF1,GDF15,IRAK2,RIPK1,SDCBP,THBS1,SEMA7A,SPAG9,PRDX1,C19orf10,MAP3K8,MAP4K3,MUL1,RAPGEF2,IL11,DNAJC27,ICAM1,MAP3K13,NRP1,GAREM,PAK1,FBXW7,PTPRR,SH3RF1,FLCN,HMGCR,BRAF,DUSP2,FGF19,TGFA,F2RL1,DUSP16,CRK,ADORA2B,PRKCE,ZNF622,TRIB1,CFLAR,PER1,DVL3,HSPH1,PRMT5,KARS,PDGFB,CAV1,RNF41,ATF3,MAP2K3,PDGFA,EPHA2,AKAP13,DUSP10,CTGF,PEA15,EFNA1,IL6R,EIF3A,DUSP5…
GO:0043405	regulation of MAP kinase activity	56	337	0.27	0.0015	9606.ENSP00000013125,9606.ENSP00000056217,9606.ENSP00000215631,9606.ENSP00000220751,9606.ENSP00000235382,9606.ENSP00000239223,9606.ENSP00000251849,9606.ENSP00000252809,9606.ENSP00000256458,9606.ENSP00000259808,9606.ENSP00000260356,9606.ENSP00000262013,9606.ENSP00000263056,9606.ENSP00000263881,9606.ENSP00000264198,9606.ENSP00000265026,9606.ENSP00000278568,9606.ENSP00000287936,9606.ENSP00000288602,…	MAP4K5,ARHGEF5,GADD45B,RIPK2,RGS2,DUSP1,RAF1,GDF15,IRAK2,RIPK1,THBS1,SPAG9,MAP3K8,MAP4K3,MUL1,MAP3K13,PAK1,HMGCR,BRAF,DUSP2,TGFA,DUSP16,CRK,ADORA2B,TRIB1,DVL3,KARS,PDGFB,CAV1,MAP2K3,PDGFA,AKAP13,DUSP10,PEA15,DUSP5,AVPI1,GADD45A,PTPN1,DKK1,DAXX,SPRY2,BMP2,EDN1,GPS2,DUSP8,TLR6,CDK12,MAP2K4,PPP2CA,CSB-PGBD3,TRAF6,UBC,MAP3K9,DUSP14,MAP3K14,IKBKG
GO:0070482	response to oxygen levels	54	321	0.27	0.0015	9606.ENSP00000179259,9606.ENSP00000212015,9606.ENSP00000216117,9606.ENSP00000228872,9606.ENSP00000239938,9606.ENSP00000250457,9606.ENSP00000251849,9606.ENSP00000260356,9606.ENSP00000263980,9606.ENSP00000264832,9606.ENSP00000265354,9606.ENSP00000278568,9606.ENSP00000287820,9606.ENSP00000292114,9606.ENSP00000297991,9606.ENSP00000298552,9606.ENSP00000299767,9606.ENSP00000306124,9606.ENSP00000306864,…	C12orf5,SIRT1,HMOX1,CDKN1B,EGR1,EGLN3,RAF1,THBS1,SLC9A1,ICAM1,SRF,PAK1,PPARG,TMEM199,AQP3,TSC1,HSP90B1,PRKCE,VASN,TBL2,DDIT4,ADAM17,CFLAR,PMAIP1,P4HB,SMAD3,ZNF354A,CAV1,NR4A2,ARNT,CTGF,CYB5R4,ANKRD1,PLK3,PLAU,BMP2,RGCC,EDN1,NKX3-1,ETS1,SLC11A2,NFE2L2,BACH1,CDKN1A,FOXO3,CREB1,SCFD1,CRYAB,ADM,UBC,CPEB2,CITED2,EGLN2,BIRC2
GO:0042149	cellular response to glucose starvation	14	37	0.62	0.0016	9606.ENSP00000216037,9606.ENSP00000253063,9606.ENSP00000254605,9606.ENSP00000262039,9606.ENSP00000307235,9606.ENSP00000307260,9606.ENSP00000324173,9606.ENSP00000326119,9606.ENSP00000330032,9606.ENSP00000356125,9606.ENSP00000362179,9606.ENSP00000380252,9606.ENSP00000384651,9606.ENSP00000476312	XBP1,SESN2,RRP8,PIK3C3,EIF2AK3,TBL2,HSPA5,PMAIP1,UPP1,NUAK2,ZC3H12A,NFE2L2,MTMR3,BHLHA15
GO:0002684	positive regulation of immune system process	118	882	0.17	0.0017	9606.ENSP00000212015,9606.ENSP00000216037,9606.ENSP00000216117,9606.ENSP00000216797,9606.ENSP00000220751,9606.ENSP00000221452,9606.ENSP00000223095,9606.ENSP00000226574,9606.ENSP00000229332,9606.ENSP00000234420,9606.ENSP00000244869,9606.ENSP00000245817,9606.ENSP00000248244,9606.ENSP00000249075,9606.ENSP00000251849,9606.ENSP00000252229,9606.ENSP00000254066,9606.ENSP00000254958,9606.ENSP00000256458,…	SIRT1,XBP1,HMOX1,NFKBIA,RIPK2,RELB,SERPINE1,NFKB1,CLEC4A,MSH6,EREG,TNFSF9,TICAM1,LIF,RAF1,MICB,RARA,JAG1,IRAK2,RIPK1,THBS1,SEMA7A,PIK3C3,NLRC5,ACIN1,MAP3K8,IL1A,ICAM1,LEF1,EIF2B2,PAK1,FER,CA2,STAT5B,CXCL3,CXCL5,F2RL1,AQP3,HSP90B1,RUNX1,CRK,FADD,IL12A,ADORA2B,PRKCE,FOS,CXCL8,CLCF1,ADAM17,TRIB1,CLU,EGR3,HSPH1,MALT1,CALR,WIPF2,ZNF335,KARS,NFKBIZ,CSF1,PDE4B,POLR3C,CAV1,RIOK3,CREB3,PSPC1,SFPQ,ARNT,ANK…
GO:0051347	positive regulation of transferase activity	90	630	0.2	0.0017	9606.ENSP00000013125,9606.ENSP00000056217,9606.ENSP00000179259,9606.ENSP00000209728,9606.ENSP00000212015,9606.ENSP00000215631,9606.ENSP00000220751,9606.ENSP00000228872,9606.ENSP00000239938,9606.ENSP00000244869,9606.ENSP00000251849,9606.ENSP00000252809,9606.ENSP00000256458,9606.ENSP00000259808,9606.ENSP00000260247,9606.ENSP00000260356,9606.ENSP00000261254,9606.ENSP00000262013,9606.ENSP00000263056,…	MAP4K5,ARHGEF5,C12orf5,CDC6,SIRT1,GADD45B,RIPK2,CDKN1B,EGR1,EREG,RAF1,GDF15,IRAK2,RIPK1,DCUN1D5,THBS1,CCND2,SPAG9,MAP3K8,MAP4K3,CCNT2,MUL1,ALS2,RAPGEF2,MAP3K13,ARRDC3,MAPKAP1,ARRDC4,TNFRSF10B,PAK1,FBXW7,PRKAG2,BRAF,TGFA,CCNL1,CRK,LRP8,ADORA2B,ADAM17,ZNF622,CLU,DVL3,PIBF1,HSPH1,MALT1,DCUN1D3,KARS,CSF1,PDGFB,SPDYA,MAP2K3,PDGFA,TOPORS,AKAP13,PROX1,DDR2,DUSP12,PEA15,EFNA1,IL6R,DUSP5,SLK,LMO4,AVPI1,GA…
GO:0071850	mitotic cell cycle arrest	9	14	0.85	0.0017	9606.ENSP00000228872,9606.ENSP00000239223,9606.ENSP00000342924,9606.ENSP00000354916,9606.ENSP00000360025,9606.ENSP00000368664,9606.ENSP00000370253,9606.ENSP00000384849,9606.ENSP00000400646	CDKN1B,DUSP1,MCPH1,CDC14A,GADD45A,RGCC,NKX3-1,CDKN1A,PNPT1
GO:0043618	regulation of transcription from RNA polymerase II promoter in response to stress	19	67	0.5	0.0021	9606.ENSP00000216037,9606.ENSP00000216117,9606.ENSP00000239938,9606.ENSP00000250457,9606.ENSP00000253063,9606.ENSP00000254322,9606.ENSP00000305422,9606.ENSP00000324173,9606.ENSP00000344352,9606.ENSP00000351407,9606.ENSP00000358081,9606.ENSP00000360266,9606.ENSP00000380252,9606.ENSP00000382805,9606.ENSP00000417273,9606.ENSP00000441543,9606.ENSP00000444198,9606.ENSP00000448665,9606.ENSP00000469686	XBP1,HMOX1,EGR1,EGLN3,SESN2,DNAJB1,CEBPB,HSPA5,ATF3,ARNT,BAG3,JUN,NFE2L2,BACH1,NCK1,UBC,CITED2,DDIT3,EGLN2
GO:0042221	response to chemical	445	4153	0.08	0.0022	9606.ENSP00000056217,9606.ENSP00000064780,9606.ENSP00000157812,9606.ENSP00000158771,9606.ENSP00000164024,9606.ENSP00000166139,9606.ENSP00000171111,9606.ENSP00000179259,9606.ENSP00000185150,9606.ENSP00000209728,9606.ENSP00000209884,9606.ENSP00000212015,9606.ENSP00000215904,9606.ENSP00000216037,9606.ENSP00000216085,9606.ENSP00000216117,9606.ENSP00000216489,9606.ENSP00000216797,9606.ENSP00000220325,…	ARHGEF5,RELT,PSMC4,DERL2,CELSR3,FSTL3,KEAP1,C12orf5,ERLEC1,CDC6,KLHL20,SIRT1,PDXP,XBP1,RHBDD3,HMOX1,ALKBH1,NFKBIA,EHD4,BRF2,RIPK2,GSR,RELB,NAMPT,FKBP14,STX1A,CYP3A5,SERPINE1,SETX,PPIF,NFKB1,ZPR1,IL10RA,CYP27B1,CDKN1B,GCLC,HBEGF,UMPS,SLC1A4,RGS2,SLC19A2,RNF103,ABCG2,DUSP1,EGR1,KALRN,EGR2,EREG,IRF1,INSIG2,TNFSF9,FOSB,TICAM1,SDF2L1,LIF,DNAJB9,DLL4,EGLN3,RAF1,MED17,MICB,GDF15,JUND,NUMBL,SESN2,AOC2,RA…
GO:0043900	regulation of multi-organism process	92	653	0.19	0.0022	9606.ENSP00000216797,9606.ENSP00000217402,9606.ENSP00000220751,9606.ENSP00000221452,9606.ENSP00000226574,9606.ENSP00000229332,9606.ENSP00000244869,9606.ENSP00000245414,9606.ENSP00000248244,9606.ENSP00000251849,9606.ENSP00000252229,9606.ENSP00000256458,9606.ENSP00000257570,9606.ENSP00000257604,9606.ENSP00000259808,9606.ENSP00000262039,9606.ENSP00000262510,9606.ENSP00000263202,9606.ENSP00000263464,…	NFKBIA,CHMP4B,RIPK2,RELB,NFKB1,CLEC4A,EREG,IRF1,TICAM1,RAF1,MICB,IRAK2,OASL,TRAFD1,RIPK1,PIK3C3,NLRC5,UFD1L,BIRC3,OSBP,MUL1,LEF1,VPS37B,PAK1,PPARG,IFNGR2,STAT5B,F2RL1,HSP90B1,CRK,FADD,IL12A,PRKCE,CXCL8,ISG20,PDE12,TRIB1,MALT1,CALR,P4HB,IFNLR1,SOCS3,NPLOC4,POLR3C,CAV1,RIOK3,CREB3,PSPC1,TBC1D20,TRIM38,SFPQ,ANKRD17,PELI1,ADARB1,GPATCH3,DUSP10,PROX1,PRDM1,CHUK,BCL10,JUN,PTPN1,ZC3H12A,PTAFR,HSPA1B,HLA…
GO:2000147	positive regulation of cell motility	71	469	0.23	0.0022	9606.ENSP00000212015,9606.ENSP00000216037,9606.ENSP00000216117,9606.ENSP00000223095,9606.ENSP00000230990,9606.ENSP00000244050,9606.ENSP00000256398,9606.ENSP00000260130,9606.ENSP00000260356,9606.ENSP00000262013,9606.ENSP00000262498,9606.ENSP00000263339,9606.ENSP00000263640,9606.ENSP00000264036,9606.ENSP00000264431,9606.ENSP00000264832,9606.ENSP00000265165,9606.ENSP00000265371,9606.ENSP00000272233,…	SIRT1,XBP1,HMOX1,SERPINE1,HBEGF,SNAI1,ELP3,SDCBP,THBS1,SPAG9,CFAP20,IL1A,ACVR1,MCAM,RAPGEF2,ICAM1,LEF1,NRP1,RHOB,PLK2,PAK1,FER,NIPBL,ITGA5,CXCL3,CXCL5,F2RL1,CRK,FADD,IL12A,PRKCE,CXCL8,ADAM17,DAB2,SSH1,ZNF609,CALR,HSPA5,KARS,CSF1,PDGFB,SMAD3,CREB3,MAP2K3,PDGFA,PTRF,P2RX4,PROX1,DDR2,IL6R,NUS1,JUN,PPAP2B,PLAU,ZC3H12A,PTAFR,SPRY2,BMP2,EDN1,GCNT2,CD274,GPNMB,FGFBP1,ETS1,CXCL1,NFE2L2,RDX,CYR61,CBLL1,CX…
GO:0030335	positive regulation of cell migration	69	452	0.23	0.0022	9606.ENSP00000212015,9606.ENSP00000216037,9606.ENSP00000216117,9606.ENSP00000223095,9606.ENSP00000230990,9606.ENSP00000244050,9606.ENSP00000256398,9606.ENSP00000260130,9606.ENSP00000260356,9606.ENSP00000262013,9606.ENSP00000263339,9606.ENSP00000263640,9606.ENSP00000264036,9606.ENSP00000264431,9606.ENSP00000264832,9606.ENSP00000265165,9606.ENSP00000265371,9606.ENSP00000272233,9606.ENSP00000274289,…	SIRT1,XBP1,HMOX1,SERPINE1,HBEGF,SNAI1,ELP3,SDCBP,THBS1,SPAG9,IL1A,ACVR1,MCAM,RAPGEF2,ICAM1,LEF1,NRP1,RHOB,PLK2,PAK1,FER,NIPBL,ITGA5,CXCL3,CXCL5,F2RL1,CRK,FADD,IL12A,PRKCE,CXCL8,ADAM17,DAB2,SSH1,ZNF609,CALR,HSPA5,KARS,CSF1,PDGFB,SMAD3,CREB3,MAP2K3,PDGFA,P2RX4,PROX1,DDR2,IL6R,NUS1,JUN,PPAP2B,PLAU,ZC3H12A,PTAFR,SPRY2,BMP2,EDN1,GCNT2,CD274,GPNMB,FGFBP1,ETS1,CXCL1,NFE2L2,RDX,CYR61,CBLL1,CXCL2,NR4A3
GO:0010647	positive regulation of cell communication	196	1631	0.13	0.0023	9606.ENSP00000013125,9606.ENSP00000056217,9606.ENSP00000157600,9606.ENSP00000202556,9606.ENSP00000212015,9606.ENSP00000215631,9606.ENSP00000216037,9606.ENSP00000216373,9606.ENSP00000220751,9606.ENSP00000222812,9606.ENSP00000225174,9606.ENSP00000226574,9606.ENSP00000228606,9606.ENSP00000230990,9606.ENSP00000240874,9606.ENSP00000244869,9606.ENSP00000246229,9606.ENSP00000248244,9606.ENSP00000249075,…	MAP4K5,ARHGEF5,LMCD1,PPP1R13B,SIRT1,GADD45B,XBP1,SOS2,RIPK2,STX1A,PPIF,NFKB1,CYP27B1,HBEGF,KALRN,EREG,PLAGL2,TICAM1,LIF,DLL4,RAF1,GDF15,JAG1,MBD2,IRAK2,RIPK1,SDCBP,THBS1,SEMA7A,SPAG9,NLRC5,C19orf10,MAP3K8,BRD4,BIRC3,ACVR1,MAP4K3,SLC9A1,MUL1,ALS2,RAPGEF2,IL11,DNAJC27,ICAM1,MAP3K13,GOLPH3,NRP1,GAL,GAREM,PLK2,PELO,TNFRSF10B,CDKN2B,PAK1,FBXW7,SH3RF1,FLCN,CA2,HMGCR,BRAF,ITGA5,FGF19,REL,TGFA,F2RL1,TERF…
GO:0051253	negative regulation of RNA metabolic process	162	1303	0.14	0.0023	9606.ENSP00000157600,9606.ENSP00000164227,9606.ENSP00000212015,9606.ENSP00000216037,9606.ENSP00000221452,9606.ENSP00000222329,9606.ENSP00000225688,9606.ENSP00000226574,9606.ENSP00000228872,9606.ENSP00000229416,9606.ENSP00000234198,9606.ENSP00000239938,9606.ENSP00000242728,9606.ENSP00000244050,9606.ENSP00000244869,9606.ENSP00000245414,9606.ENSP00000245919,9606.ENSP00000249749,9606.ENSP00000252818,…	LMCD1,BCL3,SIRT1,XBP1,RELB,ERF,RASD1,NFKB1,CDKN1B,GCLC,DLX2,EGR1,BHLHE41,SNAI1,EREG,IRF1,FOSB,DLL4,JUND,RARA,THAP1,DNAJB1,RRP8,PER2,H3F3B,MBD2,BHLHE40,TBX3,BACH2,AKIRIN2,USP2,TRIM37,ACIN1,EPC1,MXD1,LEF1,SRF,CREM,BTAF1,JDP2,CCRN4L,NIPBL,FLCN,PPARG,BTG2,ZNF281,REL,MITF,NFIL3,RUNX1,JUNB,LRP8,CEBPB,PPM1D,ZBTB5,ZNF608,ZNF239,MEPCE,ZNF431,NR1D2,DAB2,PER1,ZHX2,SUPT6H,PRMT5,CALR,RNF168,SIAH2,YAF2,PDGFB,D…
GO:1903362	regulation of cellular protein catabolic process	44	248	0.29	0.0025	9606.ENSP00000157812,9606.ENSP00000158771,9606.ENSP00000171111,9606.ENSP00000185150,9606.ENSP00000216037,9606.ENSP00000229416,9606.ENSP00000260130,9606.ENSP00000262384,9606.ENSP00000274289,9606.ENSP00000281708,9606.ENSP00000287437,9606.ENSP00000304051,9606.ENSP00000312150,9606.ENSP00000313391,9606.ENSP00000314619,9606.ENSP00000315130,9606.ENSP00000316512,9606.ENSP00000321239,9606.ENSP00000326813,…	PSMC4,DERL2,KEAP1,ERLEC1,XBP1,GCLC,SDCBP,N4BP1,PLK2,FBXW7,NSMCE2,RNF139,TRIB1,DAB2,ZFAND2A,CLU,TLK2,RCHY1,YOD1,CAV1,WAC,ARIH2,MYLIP,VCP,DDA1,SMURF1,EFNA1,BTRC,LONRF3,PLK3,RNF19B,TRIM39,TAF9,NFE2L2,LONRF1,TMF1,USP25,RDX,HERPUD1,RIC1,RYBP,SH3RF2,LDLR,TNFAIP3
GO:0043281	regulation of cysteine-type endopeptidase activity involved in apoptotic process	39	209	0.32	0.0025	9606.ENSP00000212015,9606.ENSP00000250457,9606.ENSP00000251849,9606.ENSP00000259808,9606.ENSP00000260356,9606.ENSP00000260442,9606.ENSP00000263464,9606.ENSP00000264198,9606.ENSP00000265165,9606.ENSP00000276431,9606.ENSP00000284637,9606.ENSP00000287820,9606.ENSP00000301838,9606.ENSP00000307235,9606.ENSP00000310263,9606.ENSP00000312455,9606.ENSP00000322457,9606.ENSP00000326119,9606.ENSP00000332973,…	SIRT1,EGLN3,RAF1,RIPK1,THBS1,BCL2L10,BIRC3,MUL1,LEF1,TNFRSF10B,SH3RF1,PPARG,FADD,EIF2AK3,TNFRSF10D,CFLAR,SIAH2,PMAIP1,SMAD3,PLAUR,SFN,VCP,CTGF,BCL10,MTCH1,BAK1,KLF4,XDH,SERPINB9,NKX3-1,SLC11A2,DIABLO,CYR61,HERPUD1,FNIP1,CRYAB,RPS6KA1,BIRC2,BCL2L13
GO:0023056	positive regulation of signaling	196	1638	0.12	0.0027	9606.ENSP00000013125,9606.ENSP00000056217,9606.ENSP00000157600,9606.ENSP00000202556,9606.ENSP00000212015,9606.ENSP00000215631,9606.ENSP00000216037,9606.ENSP00000216373,9606.ENSP00000220751,9606.ENSP00000222812,9606.ENSP00000225174,9606.ENSP00000226574,9606.ENSP00000228606,9606.ENSP00000230990,9606.ENSP00000240874,9606.ENSP00000244869,9606.ENSP00000246229,9606.ENSP00000248244,9606.ENSP00000249075,…	MAP4K5,ARHGEF5,LMCD1,PPP1R13B,SIRT1,GADD45B,XBP1,SOS2,RIPK2,STX1A,PPIF,NFKB1,CYP27B1,HBEGF,KALRN,EREG,PLAGL2,TICAM1,LIF,DLL4,RAF1,GDF15,JAG1,MBD2,IRAK2,RIPK1,SDCBP,THBS1,SEMA7A,SPAG9,NLRC5,C19orf10,MAP3K8,BRD4,BIRC3,ACVR1,MAP4K3,SLC9A1,MUL1,ALS2,RAPGEF2,IL11,DNAJC27,ICAM1,MAP3K13,GOLPH3,NRP1,GAL,GAREM,PLK2,PELO,TNFRSF10B,CDKN2B,PAK1,FBXW7,SH3RF1,FLCN,CA2,HMGCR,BRAF,ITGA5,FGF19,REL,TGFA,F2RL1,TERF…
GO:0001934	positive regulation of protein phosphorylation	123	941	0.16	0.0027	9606.ENSP00000013125,9606.ENSP00000056217,9606.ENSP00000209728,9606.ENSP00000212015,9606.ENSP00000215631,9606.ENSP00000216037,9606.ENSP00000220325,9606.ENSP00000220751,9606.ENSP00000228872,9606.ENSP00000230990,9606.ENSP00000239938,9606.ENSP00000244869,9606.ENSP00000249075,9606.ENSP00000251849,9606.ENSP00000252809,9606.ENSP00000256458,9606.ENSP00000259808,9606.ENSP00000260130,9606.ENSP00000260356,…	MAP4K5,ARHGEF5,CDC6,SIRT1,GADD45B,XBP1,EHD4,RIPK2,CDKN1B,HBEGF,EGR1,EREG,LIF,RAF1,GDF15,IRAK2,RIPK1,SDCBP,THBS1,CCND2,SEMA7A,SPAG9,C19orf10,MAP3K8,ACVR1,MAP4K3,CCNT2,MUL1,ALS2,RAPGEF2,IL11,DNAJC27,ICAM1,MAP3K13,NRP1,MAPKAP1,GAREM,TNFRSF10B,PAK1,FBXW7,SH3RF1,FLCN,PRKAG2,HMGCR,BRAF,ITGA5,FGF19,TGFA,CCNL1,SENP2,F2RL1,TERF2IP,CRK,IL12A,LRP8,ADORA2B,PRKCE,CLCF1,ADAM17,ZNF622,CFLAR,DAB2,CLU,DVL3,PIBF1,…
GO:0032103	positive regulation of response to external stimulus	74	499	0.22	0.0027	9606.ENSP00000216797,9606.ENSP00000220751,9606.ENSP00000221452,9606.ENSP00000223095,9606.ENSP00000226574,9606.ENSP00000228606,9606.ENSP00000229332,9606.ENSP00000244869,9606.ENSP00000248244,9606.ENSP00000251849,9606.ENSP00000256458,9606.ENSP00000259808,9606.ENSP00000260356,9606.ENSP00000262039,9606.ENSP00000262510,9606.ENSP00000265371,9606.ENSP00000278568,9606.ENSP00000293328,9606.ENSP00000296026,…	NFKBIA,RIPK2,RELB,SERPINE1,NFKB1,CYP27B1,CLEC4A,EREG,TICAM1,RAF1,IRAK2,RIPK1,THBS1,PIK3C3,NLRC5,NRP1,PAK1,STAT5B,CXCL3,CXCL5,F2RL1,HSP90B1,FADD,IL12A,ADORA2B,PRKCE,CXCL8,ADAM17,MALT1,CALR,KARS,CSF1,PDGFB,SMAD3,NDEL1,POLR3C,STX3,CAV1,RIOK3,CREB3,PSPC1,SFPQ,ANKRD17,PELI1,P2RX4,IL6R,CHUK,BCL10,PTAFR,HSPA1B,HLA-E,OPTN,EDN1,DDX58,TRIM5,RSAD2,ETS1,AP1G1,CXCL1,POLR3D,RELA,TLR6,CYLD,PVR,MUC4,CXCL2,TRAF6,…
GO:2001234	negative regulation of apoptotic signaling pathway	40	218	0.31	0.0027	9606.ENSP00000198767,9606.ENSP00000212015,9606.ENSP00000216037,9606.ENSP00000216117,9606.ENSP00000223095,9606.ENSP00000225174,9606.ENSP00000229416,9606.ENSP00000244050,9606.ENSP00000251849,9606.ENSP00000259808,9606.ENSP00000260356,9606.ENSP00000260442,9606.ENSP00000263339,9606.ENSP00000263640,9606.ENSP00000264832,9606.ENSP00000265371,9606.ENSP00000276431,9606.ENSP00000284637,9606.ENSP00000301838,…	RRN3,SIRT1,XBP1,HMOX1,SERPINE1,PPIF,GCLC,SNAI1,RAF1,RIPK1,THBS1,BCL2L10,IL1A,ACVR1,ICAM1,NRP1,TNFRSF10B,SH3RF1,FADD,CFLAR,CLU,HSPH1,SIAH2,PLAUR,CREB3,NR4A2,PEA15,MCL1,GCLM,PTPN1,EYA3,HSPA1B,SYVN1,TAF9,NFE2L2,VIMP,RELA,HERPUD1,BDKRB2,TNFAIP3
GO:0030155	regulation of cell adhesion	88	623	0.2	0.0028	9606.ENSP00000166139,9606.ENSP00000216037,9606.ENSP00000220751,9606.ENSP00000223095,9606.ENSP00000245414,9606.ENSP00000245817,9606.ENSP00000254066,9606.ENSP00000254958,9606.ENSP00000257527,9606.ENSP00000260356,9606.ENSP00000263056,9606.ENSP00000263980,9606.ENSP00000264832,9606.ENSP00000265165,9606.ENSP00000265354,9606.ENSP00000265371,9606.ENSP00000278568,9606.ENSP00000284273,9606.ENSP00000285071,…	FSTL3,XBP1,RIPK2,SERPINE1,IRF1,TNFSF9,RARA,JAG1,ADAM19,THBS1,MAP3K8,SLC9A1,ICAM1,LEF1,SRF,NRP1,PAK1,UBASH3B,FLCN,STAT5B,ITGA5,CYTH3,TSC1,RUNX1,CRK,FADD,IL12A,CEBPB,PRKCE,CXCL8,RND1,TFE3,EGR3,HSPH1,MALT1,CALR,LAMA3,NFKBIZ,CSF1,SMAD3,STX3,CAV1,NET1,NRARP,BTN2A2,EPHA2,PELI1,CYTH1,DUSP10,EFNA1,SLK,BCL10,PPAP2B,DLG5,SDC4,PLAU,ZC3H12A,PTAFR,KLF4,HLA-E,BMP2,CD83,RGCC,GCNT2,CD274,GPNMB,LAMA1,ETS1,IL4R,MB…
GO:0036293	response to decreased oxygen levels	50	298	0.27	0.0028	9606.ENSP00000179259,9606.ENSP00000212015,9606.ENSP00000216117,9606.ENSP00000228872,9606.ENSP00000239938,9606.ENSP00000250457,9606.ENSP00000251849,9606.ENSP00000260356,9606.ENSP00000263980,9606.ENSP00000264832,9606.ENSP00000265354,9606.ENSP00000278568,9606.ENSP00000297991,9606.ENSP00000298552,9606.ENSP00000299767,9606.ENSP00000306124,9606.ENSP00000306864,9606.ENSP00000307260,9606.ENSP00000307305,…	C12orf5,SIRT1,HMOX1,CDKN1B,EGR1,EGLN3,RAF1,THBS1,SLC9A1,ICAM1,SRF,PAK1,AQP3,TSC1,HSP90B1,PRKCE,VASN,TBL2,DDIT4,ADAM17,CFLAR,PMAIP1,P4HB,SMAD3,ZNF354A,CAV1,NR4A2,ARNT,CTGF,ANKRD1,PLK3,PLAU,BMP2,RGCC,EDN1,NKX3-1,ETS1,SLC11A2,NFE2L2,BACH1,FOXO3,CREB1,SCFD1,CRYAB,ADM,UBC,CPEB2,CITED2,EGLN2,BIRC2
GO:0043123	positive regulation of I-kappaB kinase/NF-kappaB signaling	27	122	0.39	0.0028	9606.ENSP00000220751,9606.ENSP00000248244,9606.ENSP00000259808,9606.ENSP00000263377,9606.ENSP00000263464,9606.ENSP00000276431,9606.ENSP00000295025,9606.ENSP00000296677,9606.ENSP00000300086,9606.ENSP00000301838,9606.ENSP00000306124,9606.ENSP00000312455,9606.ENSP00000321026,9606.ENSP00000349596,9606.ENSP00000351416,9606.ENSP00000351789,9606.ENSP00000354718,9606.ENSP00000359424,9606.ENSP00000359612,…	RIPK2,TICAM1,RIPK1,BRD4,BIRC3,TNFRSF10B,REL,F2RL1,TERF2IP,FADD,PRKCE,CFLAR,LURAP1L,TRIM38,ANKRD17,PELI1,AKAP13,CHUK,BCL10,PIM2,TRIM5,RELA,TLR6,TRAF6,BIRC2,MAP3K14,IKBKG
GO:0002682	regulation of immune system process	170	1391	0.13	0.0031	9606.ENSP00000166139,9606.ENSP00000212015,9606.ENSP00000216037,9606.ENSP00000216085,9606.ENSP00000216117,9606.ENSP00000216797,9606.ENSP00000220751,9606.ENSP00000221452,9606.ENSP00000223095,9606.ENSP00000226574,9606.ENSP00000229332,9606.ENSP00000234420,9606.ENSP00000239882,9606.ENSP00000244869,9606.ENSP00000245414,9606.ENSP00000245817,9606.ENSP00000248244,9606.ENSP00000249075,9606.ENSP00000251849,…	FSTL3,SIRT1,XBP1,RHBDD3,HMOX1,NFKBIA,RIPK2,RELB,SERPINE1,NFKB1,CLEC4A,MSH6,ELF1,EREG,IRF1,TNFSF9,TICAM1,LIF,RAF1,MICB,RARA,H3F3B,JAG1,IRAK2,TRAFD1,RIPK1,THBS1,SEMA7A,PIK3C3,NLRC5,ACIN1,MAP3K8,UFD1L,IL1A,BIRC3,MUL1,ICAM1,LEF1,GAL,EIF2B2,PAK1,FER,FBXW7,UBASH3B,SH3RF1,FLCN,CA2,PPARG,IFNGR2,STAT5B,MITF,CXCL3,CXCL5,F2RL1,AQP3,HSP90B1,RUNX1,CRK,FADD,IL12A,ADORA2B,CEBPB,PRKCE,FOS,CXCL8,CLCF1,ADAM17,TRIB…
GO:0045597	positive regulation of cell differentiation	119	908	0.16	0.0031	9606.ENSP00000198767,9606.ENSP00000212015,9606.ENSP00000216037,9606.ENSP00000220751,9606.ENSP00000223095,9606.ENSP00000224140,9606.ENSP00000226574,9606.ENSP00000228606,9606.ENSP00000234198,9606.ENSP00000235382,9606.ENSP00000240874,9606.ENSP00000244050,9606.ENSP00000245817,9606.ENSP00000249075,9606.ENSP00000252809,9606.ENSP00000252818,9606.ENSP00000252891,9606.ENSP00000254066,9606.ENSP00000254958,…	RRN3,SIRT1,XBP1,RIPK2,SERPINE1,SETX,NFKB1,CYP27B1,DLX2,RGS2,KALRN,SNAI1,TNFSF9,LIF,GDF15,JUND,NUMBL,RARA,JAG1,BTG1,RIPK1,SDCBP,MAPK6,SEMA7A,SPAG9,ACIN1,ACVR1,MUL1,RAPGEF2,LEF1,SRF,NRP1,PAK1,CCRN4L,NIPBL,CA2,PPARG,STAT5B,RUNX1,CRK,FADD,IL12A,JUNB,LRP8,CEBPB,FOS,ETV5,CLCF1,TRIB1,CFLAR,DAB2,METRNL,DVL3,ZNF609,EGR3,PRMT5,MALT1,CALR,HSPA5,ZNF335,NFKBIZ,TNFRSF12A,CSF1,SOCS3,SMAD3,NDEL1,SFN,DPYSL3,NET1,…
GO:0033993	response to lipid	110	825	0.17	0.0031	9606.ENSP00000064780,9606.ENSP00000216037,9606.ENSP00000216797,9606.ENSP00000220751,9606.ENSP00000223095,9606.ENSP00000224140,9606.ENSP00000226574,9606.ENSP00000227752,9606.ENSP00000228606,9606.ENSP00000228872,9606.ENSP00000239223,9606.ENSP00000245787,9606.ENSP00000245919,9606.ENSP00000248244,9606.ENSP00000251871,9606.ENSP00000252229,9606.ENSP00000252818,9606.ENSP00000254066,9606.ENSP00000256429,…	RELT,XBP1,NFKBIA,RIPK2,SERPINE1,SETX,NFKB1,IL10RA,CYP27B1,CDKN1B,DUSP1,INSIG2,FOSB,TICAM1,MED17,MICB,JUND,RARA,MBD2,IRAK2,AKIRIN2,THBS1,ADNP2,PPAP2A,ICAM1,SOX30,LEF1,NPC1,AKAP8,TNFRSF10B,CCRN4L,FER,CA2,PPARG,STAT5B,CXCL3,CXCL5,AQP3,IL12A,JUNB,LRP8,CEBPB,PRKCE,FOS,CXCL8,DDIT4,ADAM17,NR1D2,FOSL1,TNFRSF10D,TRIB1,CFLAR,NFKBIB,CALR,HMGCS1,PDE4B,CAV1,NR4A2,INSIG1,PMEPA1,PELI1,CTR9,DUSP10,CTGF,NFKB2,CHU…
GO:2001242	regulation of intrinsic apoptotic signaling pathway	32	159	0.35	0.0031	9606.ENSP00000198767,9606.ENSP00000212015,9606.ENSP00000216037,9606.ENSP00000225174,9606.ENSP00000244050,9606.ENSP00000246229,9606.ENSP00000260442,9606.ENSP00000281708,9606.ENSP00000307235,9606.ENSP00000315130,9606.ENSP00000318687,9606.ENSP00000326119,9606.ENSP00000327801,9606.ENSP00000339191,9606.ENSP00000339328,9606.ENSP00000342136,9606.ENSP00000349748,9606.ENSP00000354829,9606.ENSP00000358022,…	RRN3,SIRT1,XBP1,PPIF,SNAI1,PLAGL2,BCL2L10,FBXW7,EIF2AK3,CLU,HSPH1,PMAIP1,P4HB,CAV1,PLAUR,CREB3,SFPQ,SGMS1,MCL1,PTPN1,SYVN1,TAF9,NKX3-1,NFE2L2,VIMP,CYLD,HERPUD1,SKIL,NCK1,BCLAF1,DDIT3,BDKRB2
GO:0040017	positive regulation of locomotion	74	503	0.21	0.0032	9606.ENSP00000212015,9606.ENSP00000216037,9606.ENSP00000216117,9606.ENSP00000217402,9606.ENSP00000223095,9606.ENSP00000230990,9606.ENSP00000244050,9606.ENSP00000256398,9606.ENSP00000260130,9606.ENSP00000260356,9606.ENSP00000262013,9606.ENSP00000262498,9606.ENSP00000263339,9606.ENSP00000263640,9606.ENSP00000264036,9606.ENSP00000264431,9606.ENSP00000264832,9606.ENSP00000265165,9606.ENSP00000265371,…	SIRT1,XBP1,HMOX1,CHMP4B,SERPINE1,HBEGF,SNAI1,ELP3,SDCBP,THBS1,SPAG9,CFAP20,IL1A,ACVR1,MCAM,RAPGEF2,ICAM1,LEF1,NRP1,VPS37B,RHOB,PLK2,PAK1,FER,NIPBL,ITGA5,CXCL3,CXCL5,F2RL1,CRK,FADD,IL12A,PRKCE,CXCL8,ADAM17,DAB2,SSH1,ZNF609,CALR,HSPA5,KARS,CSF1,PDGFB,SMAD3,STX3,CREB3,MAP2K3,PDGFA,PTRF,P2RX4,PROX1,DDR2,IL6R,NUS1,JUN,PPAP2B,PLAU,ZC3H12A,PTAFR,SPRY2,BMP2,EDN1,GCNT2,CD274,GPNMB,FGFBP1,ETS1,CXCL1,NFE2L2…
GO:0045595	regulation of cell differentiation	201	1695	0.12	0.0033	9606.ENSP00000166139,9606.ENSP00000171111,9606.ENSP00000198767,9606.ENSP00000212015,9606.ENSP00000216037,9606.ENSP00000216797,9606.ENSP00000220751,9606.ENSP00000223095,9606.ENSP00000224140,9606.ENSP00000226574,9606.ENSP00000228606,9606.ENSP00000228872,9606.ENSP00000234198,9606.ENSP00000235382,9606.ENSP00000236925,9606.ENSP00000240874,9606.ENSP00000242728,9606.ENSP00000244050,9606.ENSP00000244869,…	FSTL3,KEAP1,RRN3,SIRT1,XBP1,NFKBIA,RIPK2,SERPINE1,SETX,NFKB1,CYP27B1,CDKN1B,DLX2,RGS2,CAMSAP2,KALRN,BHLHE41,SNAI1,EREG,IRF1,TNFSF9,LIF,DLL4,RAF1,GDF15,JUND,NUMBL,RARA,PER2,H3F3B,JAG1,BTG1,TBX3,RIPK1,SDCBP,THBS1,MAPK6,SEMA7A,SPAG9,ACIN1,ACVR1,CCNT2,MUL1,RAPGEF2,LEF1,FSTL4,SRF,NRP1,GAL,JDP2,SIK1,PLK2,PAK1,CCRN4L,FBXW7,NIPBL,UBASH3B,SH3RF1,FLCN,CA2,PPARG,ISL2,STAT5B,MITF,AQP3,TSC1,RUNX1,CRK,FADD,IL1…
GO:0014070	response to organic cyclic compound	115	873	0.16	0.0033	9606.ENSP00000215904,9606.ENSP00000216797,9606.ENSP00000220751,9606.ENSP00000222553,9606.ENSP00000226574,9606.ENSP00000228606,9606.ENSP00000228872,9606.ENSP00000229416,9606.ENSP00000239223,9606.ENSP00000239938,9606.ENSP00000240874,9606.ENSP00000245919,9606.ENSP00000248244,9606.ENSP00000251871,9606.ENSP00000252818,9606.ENSP00000254066,9606.ENSP00000256429,9606.ENSP00000260356,9606.ENSP00000263980,…	PDXP,NFKBIA,RIPK2,NAMPT,NFKB1,CYP27B1,CDKN1B,GCLC,DUSP1,EGR1,KALRN,FOSB,TICAM1,MED17,JUND,RARA,MBD2,THBS1,SLC9A1,MUL1,RAPGEF2,PPAP2A,ICAM1,SOX30,LEF1,CHKA,NPC1,PLIN2,CA2,PPARG,BTG2,STAT5B,SNIP1,AQP3,HSP90B1,FADD,JUNB,LRP8,CEBPB,PRKCE,FOS,DDIT4,PDE12,NR1D2,FOSL1,CFLAR,PER1,SSH1,CALR,HMGCS1,HSPA5,PPP2R2A,PMAIP1,PDGFB,PDE4B,SMAD3,HOMER1,ZNF354A,CAV1,RIOK3,NR4A2,INSIG1,PMEPA1,PELI1,P2RX4,CTGF,PEA15,C…
GO:0031098	stress-activated protein kinase signaling cascade	29	138	0.37	0.0033	9606.ENSP00000013125,9606.ENSP00000220751,9606.ENSP00000226574,9606.ENSP00000256458,9606.ENSP00000259808,9606.ENSP00000262013,9606.ENSP00000263056,9606.ENSP00000263881,9606.ENSP00000264198,9606.ENSP00000265026,9606.ENSP00000265960,9606.ENSP00000304501,9606.ENSP00000312150,9606.ENSP00000345083,9606.ENSP00000358770,9606.ENSP00000359206,9606.ENSP00000359424,9606.ENSP00000360683,9606.ENSP00000363668,…	MAP4K5,RIPK2,NFKB1,IRAK2,RIPK1,SPAG9,MAP3K8,MAP4K3,MUL1,MAP3K13,MAPKAP1,ADORA2B,TRIB1,MAP2K3,SLK,BTRC,CHUK,PTPN1,DAXX,GPS2,MAP2K4,CSB-PGBD3,CRYAB,TRAF6,UBC,MAP3K9,ZFP36,MAP3K14,IKBKG
GO:0036499	PERK-mediated unfolded protein response	8	12	0.87	0.0034	9606.ENSP00000256383,9606.ENSP00000306512,9606.ENSP00000307235,9606.ENSP00000324173,9606.ENSP00000344352,9606.ENSP00000380252,9606.ENSP00000409555,9606.ENSP00000448665	EIF2S1,CXCL8,EIF2AK3,HSPA5,ATF3,NFE2L2,HERPUD1,DDIT3
GO:0051239	regulation of multicellular organismal process	310	2788	0.09	0.0035	9606.ENSP00000157600,9606.ENSP00000164024,9606.ENSP00000164227,9606.ENSP00000166139,9606.ENSP00000171111,9606.ENSP00000198767,9606.ENSP00000212015,9606.ENSP00000216037,9606.ENSP00000216117,9606.ENSP00000216797,9606.ENSP00000220751,9606.ENSP00000221452,9606.ENSP00000222812,9606.ENSP00000223095,9606.ENSP00000224140,9606.ENSP00000226574,9606.ENSP00000227322,9606.ENSP00000228606,9606.ENSP00000228872,…	LMCD1,CELSR3,BCL3,FSTL3,KEAP1,RRN3,SIRT1,XBP1,HMOX1,NFKBIA,RIPK2,RELB,STX1A,SERPINE1,SETX,NFKB1,ZPR1,CYP27B1,CDKN1B,CLEC4A,HBEGF,TUSC2,DLX2,MSH6,RGS2,CAMSAP2,ELF1,EGR1,KALRN,EGR2,SNAI1,EREG,IRF1,TNFSF9,WNK4,TICAM1,LIF,DLL4,GDF15,JUND,NUMBL,RARA,PER2,H3F3B,JAG1,BTG1,TBX3,AKIRIN2,RAB11FIP5,RIPK1,SDCBP,THBS1,LIPG,LHX5,MAPK6,SEMA7A,SPAG9,NLRC5,ACIN1,C19orf10,UFD1L,IL1A,KCNK6,BIRC3,ACVR1,SLC9A1,LCAT,M…
GO:0032879	regulation of localization	284	2524	0.1	0.0035	9606.ENSP00000056217,9606.ENSP00000158771,9606.ENSP00000164024,9606.ENSP00000185150,9606.ENSP00000202556,9606.ENSP00000212015,9606.ENSP00000216037,9606.ENSP00000216085,9606.ENSP00000216117,9606.ENSP00000216797,9606.ENSP00000218176,9606.ENSP00000220325,9606.ENSP00000220509,9606.ENSP00000220751,9606.ENSP00000222812,9606.ENSP00000223095,9606.ENSP00000225174,9606.ENSP00000226574,9606.ENSP00000227322,…	ARHGEF5,DERL2,CELSR3,ERLEC1,PPP1R13B,SIRT1,XBP1,RHBDD3,HMOX1,NFKBIA,KCND1,EHD4,VPS18,RIPK2,STX1A,SERPINE1,PPIF,NFKB1,ZPR1,CDKN1B,HBEGF,RGS2,KALRN,SNAI1,EREG,WNK4,LIF,DLL4,RAF1,SESN2,PER2,JAG1,ELP3,RAB11FIP5,SLC31A2,RIPK1,SDCBP,THBS1,PREB,LIPG,SPAG9,PIK3C3,TSPAN13,CFAP20,IL1A,KCNK6,ACVR1,SLC9A1,MCAM,MUL1,RAPGEF2,IL11,DNAJC27,ICAM1,GOLPH3,LEF1,SRF,NRP1,GAL,EXPH5,SIK1,RHOB,RAB5A,PLK2,YIPF5,PAK1,FER,…
GO:0015931	nucleobase-containing compound transport	41	230	0.3	0.0036	9606.ENSP00000240333,9606.ENSP00000254998,9606.ENSP00000272645,9606.ENSP00000281456,9606.ENSP00000291552,9606.ENSP00000295822,9606.ENSP00000296257,9606.ENSP00000297578,9606.ENSP00000297990,9606.ENSP00000298552,9606.ENSP00000306117,9606.ENSP00000306328,9606.ENSP00000316032,9606.ENSP00000319104,9606.ENSP00000322396,9606.ENSP00000326693,9606.ENSP00000333657,9606.ENSP00000339245,9606.ENSP00000345895,…	SLC35B1,NXT1,POLR2D,SLC25A4,U2AFBP,EIF5A2,SENP2,SLC25A32,NOL6,TSC1,DDX19A,SLC25A33,NUP98,SUPT6H,RRS1,SLC25A42,MX2,YTHDC1,NUP50,BICD2,NUP214,LTV1,SLC25A25,SRSF3,ZNF593,IGF2BP2,TMEM241,SRSF2,SLC33A1,POM121,RAE1,SLC25A19,AGFG1,PNPT1,SMG1,SLC35A2,THOC5,ALYREF,NXF1,NUP153,ZFP36
GO:1901698	response to nitrogen compound	127	988	0.15	0.0037	9606.ENSP00000157812,9606.ENSP00000158771,9606.ENSP00000185150,9606.ENSP00000209728,9606.ENSP00000212015,9606.ENSP00000215904,9606.ENSP00000216037,9606.ENSP00000216797,9606.ENSP00000220751,9606.ENSP00000226574,9606.ENSP00000228872,9606.ENSP00000229416,9606.ENSP00000235382,9606.ENSP00000237455,9606.ENSP00000239223,9606.ENSP00000239938,9606.ENSP00000240874,9606.ENSP00000242480,9606.ENSP00000244869,…	PSMC4,DERL2,ERLEC1,CDC6,SIRT1,PDXP,XBP1,NFKBIA,RIPK2,NFKB1,CDKN1B,GCLC,RGS2,RNF103,DUSP1,EGR1,KALRN,EGR2,EREG,INSIG2,FOSB,TICAM1,SDF2L1,DNAJB9,JUND,SESN2,JAG1,BTG1,KIAA0368,FAF2,PIK3C3,UFD1L,SLC9A1,MUL1,RAPGEF2,ICAM1,GAL,EIF2B2,NPC1,PAK1,FER,QDPR,CA2,PPARG,BTG2,STAT5B,SNIP1,TSC1,HSP90B1,CRK,FADD,JUNB,RNF139,CEBPB,PRKCE,FOS,SLC25A33,YWHAG,PDE12,FOSL1,CFLAR,PER1,SSH1,HMGCS1,HSPA5,PPP2R2A,PMAIP1,YOD…
GO:0043902	positive regulation of multi-organism process	61	394	0.24	0.0037	9606.ENSP00000216797,9606.ENSP00000217402,9606.ENSP00000220751,9606.ENSP00000221452,9606.ENSP00000226574,9606.ENSP00000229332,9606.ENSP00000244869,9606.ENSP00000248244,9606.ENSP00000251849,9606.ENSP00000256458,9606.ENSP00000259808,9606.ENSP00000262039,9606.ENSP00000262510,9606.ENSP00000263847,9606.ENSP00000265165,9606.ENSP00000267202,9606.ENSP00000278568,9606.ENSP00000293328,9606.ENSP00000296677,…	NFKBIA,CHMP4B,RIPK2,RELB,NFKB1,CLEC4A,EREG,TICAM1,RAF1,IRAK2,RIPK1,PIK3C3,NLRC5,OSBP,LEF1,VPS37B,PAK1,STAT5B,F2RL1,HSP90B1,FADD,IL12A,PRKCE,PDE12,MALT1,P4HB,POLR3C,CAV1,RIOK3,PSPC1,TBC1D20,TRIM38,SFPQ,ANKRD17,PELI1,ADARB1,CHUK,BCL10,JUN,PTAFR,HSPA1B,HLA-E,OPTN,DDX58,TRIM5,LHFPL2,RSAD2,AP1G1,POLR3D,RELA,TLR6,CYLD,PVR,MUC4,TRAF6,UBC,TRAF3,RPS6KA5,ITCH,TNFAIP3,IKBKG
GO:0051055	negative regulation of lipid biosynthetic process	15	47	0.55	0.0037	9606.ENSP00000212015,9606.ENSP00000226574,9606.ENSP00000228606,9606.ENSP00000243045,9606.ENSP00000244050,9606.ENSP00000245787,9606.ENSP00000270162,9606.ENSP00000281708,9606.ENSP00000294312,9606.ENSP00000317144,9606.ENSP00000330382,9606.ENSP00000344741,9606.ENSP00000346508,9606.ENSP00000355925,9606.ENSP00000368104	SIRT1,NFKB1,CYP27B1,ORMDL2,SNAI1,INSIG2,SIK1,FBXW7,FGF19,PIBF1,PDGFB,INSIG1,PDGFA,PROX1,BMP2
GO:0006793	phosphorus metabolic process	240	2086	0.11	0.0038	9606.ENSP00000013125,9606.ENSP00000179259,9606.ENSP00000200453,9606.ENSP00000210444,9606.ENSP00000215904,9606.ENSP00000216085,9606.ENSP00000220751,9606.ENSP00000221086,9606.ENSP00000222553,9606.ENSP00000224140,9606.ENSP00000226574,9606.ENSP00000227868,9606.ENSP00000228872,9606.ENSP00000229395,9606.ENSP00000230990,9606.ENSP00000232607,9606.ENSP00000237264,9606.ENSP00000239223,9606.ENSP00000240874,…	MAP4K5,C12orf5,PPP1R15A,NANS,PDXP,RHBDD3,RIPK2,MTMR9,NAMPT,SETX,NFKB1,PDHX,CDKN1B,FGFR1OP2,HBEGF,UMPS,TBPL1,DUSP1,KALRN,EREG,WNK4,LIF,RAF1,RARA,PRKAB2,ILKAP,EIF2S1,IRAK2,TBRG4,HUS1,RIPK1,EPT1,LIPG,COX10,MAPK6,SPAG9,PIK3C3,PGS1,MAP3K8,ITPKC,ACVR1,MAP4K3,LCAT,CCNT2,MUL1,PIKFYVE,RAPGEF2,PPAP2A,MAP3K13,NRP1,CHKA,GTF2H1,SIK1,SLC20A1,RAB5A,PLK2,PAK1,PPP4C,FER,RIOK2,PTPRR,UBASH3B,CA3,PRKAG2,HMGCR,IPPK,B…
GO:0031396	regulation of protein ubiquitination	36	192	0.32	0.0038	9606.ENSP00000220751,9606.ENSP00000229416,9606.ENSP00000248244,9606.ENSP00000254657,9606.ENSP00000260247,9606.ENSP00000262384,9606.ENSP00000263464,9606.ENSP00000265138,9606.ENSP00000268042,9606.ENSP00000269856,9606.ENSP00000281708,9606.ENSP00000296257,9606.ENSP00000304051,9606.ENSP00000306124,9606.ENSP00000318966,9606.ENSP00000319279,9606.ENSP00000319482,9606.ENSP00000321239,9606.ENSP00000322457,…	RIPK2,GCLC,TICAM1,PER2,DCUN1D5,N4BP1,BIRC3,ARRDC3,ARRDC4,FEM1A,FBXW7,SENP2,RNF139,PRKCE,PINX1,MALT1,DCUN1D3,RCHY1,SIAH2,HSPA5,CAV1,RASSF1,PELI1,TOPORS,CTR9,BCL10,DAXX,HSPA1B,GPS2,HERPUD1,DCUN1D2,UBR5,TRAF6,RNF111,BIRC2,TNFAIP3
GO:0071345	cellular response to cytokine stimulus	123	953	0.16	0.004	9606.ENSP00000064780,9606.ENSP00000171111,9606.ENSP00000212015,9606.ENSP00000216037,9606.ENSP00000216117,9606.ENSP00000216797,9606.ENSP00000220751,9606.ENSP00000222812,9606.ENSP00000226574,9606.ENSP00000227752,9606.ENSP00000239938,9606.ENSP00000244869,9606.ENSP00000245414,9606.ENSP00000245817,9606.ENSP00000249075,9606.ENSP00000252891,9606.ENSP00000256458,9606.ENSP00000257570,9606.ENSP00000259808,…	RELT,KEAP1,SIRT1,XBP1,HMOX1,NFKBIA,RIPK2,STX1A,NFKB1,IL10RA,EGR1,EREG,IRF1,TNFSF9,LIF,NUMBL,IRAK2,OASL,RIPK1,THBS1,MAP3K8,IL1A,BIRC3,IL11,ICAM1,LEF1,TNFRSF10B,FER,IFNGR2,STAT5B,PCOLCE2,CXCL3,CXCL5,NFIL3,HSP90B1,CRK,IL12A,JUNB,LRP8,CEBPB,B3GNT2,FOS,CXCL8,ISG20,PDE12,CLCF1,ADAM17,TNFRSF10D,TOLLIP,MMP1,HSPA5,KARS,TNFRSF12A,CSF1,P4HB,IFNLR1,SOCS3,PDGFB,RAB12,SMAD3,MX2,STX3,JARID2,DPYSL3,OCLN,TRIM38,A…
GO:0010256	endomembrane system organization	54	337	0.25	0.004	9606.ENSP00000163416,9606.ENSP00000217402,9606.ENSP00000220509,9606.ENSP00000231668,9606.ENSP00000234160,9606.ENSP00000237264,9606.ENSP00000258654,9606.ENSP00000259339,9606.ENSP00000261681,9606.ENSP00000262039,9606.ENSP00000262225,9606.ENSP00000264276,9606.ENSP00000265070,9606.ENSP00000265909,9606.ENSP00000267202,9606.ENSP00000267622,9606.ENSP00000286760,9606.ENSP00000294179,9606.ENSP00000307235,…	GOLGA5,CHMP4B,VPS18,BNIP1,GORASP2,TBPL1,COG3,TOR1B,MPP5,PIK3C3,TMED2,ALS2,GOLPH3,SNX19,VPS37B,TRIP11,WHAMM,STX5,EIF2AK3,ATP8B3,CLU,VPS37A,PRMT5,SEC16A,TMED9,NPLOC4,NDEL1,CAV1,TBC1D20,ANKLE2,EXOC8,BLZF1,SEC23IP,PI4K2A,STX16,SURF4,PLK3,TJAP1,PLEKHM2,STAM,OPTN,LYST,SQSTM1,GOLGB1,USP8,TMF1,AGFG1,CREB1,BLOC1S3,LPIN1,RAB30,ATP2A2,USO1,BHLHA15
GO:1903050	regulation of proteolysis involved in cellular protein catabolic process	39	216	0.3	0.004	9606.ENSP00000157812,9606.ENSP00000158771,9606.ENSP00000171111,9606.ENSP00000185150,9606.ENSP00000216037,9606.ENSP00000229416,9606.ENSP00000260130,9606.ENSP00000262384,9606.ENSP00000274289,9606.ENSP00000281708,9606.ENSP00000287437,9606.ENSP00000304051,9606.ENSP00000312150,9606.ENSP00000313391,9606.ENSP00000314619,9606.ENSP00000315130,9606.ENSP00000316512,9606.ENSP00000321239,9606.ENSP00000326813,…	PSMC4,DERL2,KEAP1,ERLEC1,XBP1,GCLC,SDCBP,N4BP1,PLK2,FBXW7,NSMCE2,RNF139,TRIB1,DAB2,ZFAND2A,CLU,TLK2,RCHY1,YOD1,CAV1,WAC,ARIH2,VCP,DDA1,SMURF1,EFNA1,BTRC,LONRF3,PLK3,RNF19B,TRIM39,TAF9,NFE2L2,LONRF1,TMF1,USP25,HERPUD1,RYBP,SH3RF2
GO:0061136	regulation of proteasomal protein catabolic process	35	185	0.32	0.004	9606.ENSP00000157812,9606.ENSP00000158771,9606.ENSP00000171111,9606.ENSP00000185150,9606.ENSP00000216037,9606.ENSP00000229416,9606.ENSP00000260130,9606.ENSP00000262384,9606.ENSP00000274289,9606.ENSP00000281708,9606.ENSP00000287437,9606.ENSP00000312150,9606.ENSP00000313391,9606.ENSP00000314619,9606.ENSP00000315130,9606.ENSP00000316512,9606.ENSP00000321239,9606.ENSP00000326813,9606.ENSP00000339191,…	PSMC4,DERL2,KEAP1,ERLEC1,XBP1,GCLC,SDCBP,N4BP1,PLK2,FBXW7,NSMCE2,TRIB1,DAB2,ZFAND2A,CLU,TLK2,RCHY1,YOD1,CAV1,WAC,ARIH2,VCP,DDA1,BTRC,LONRF3,PLK3,RNF19B,TAF9,NFE2L2,LONRF1,TMF1,USP25,HERPUD1,RYBP,SH3RF2
GO:0009266	response to temperature stimulus	31	155	0.35	0.004	9606.ENSP00000216117,9606.ENSP00000216797,9606.ENSP00000229416,9606.ENSP00000252229,9606.ENSP00000256383,9606.ENSP00000260356,9606.ENSP00000263339,9606.ENSP00000263980,9606.ENSP00000266126,9606.ENSP00000272645,9606.ENSP00000287820,9606.ENSP00000301365,9606.ENSP00000306245,9606.ENSP00000307235,9606.ENSP00000314030,9606.ENSP00000315731,9606.ENSP00000356410,9606.ENSP00000356549,9606.ENSP00000358081,…	HMOX1,NFKBIA,GCLC,MICB,EIF2S1,THBS1,IL1A,SLC9A1,EIF2B2,POLR2D,PPARG,TRPV3,FOS,EIF2AK3,DNAJA2,METRNL,GLRX2,IER5,BAG3,ADRB1,ABCC2,DNAJB4,DAXX,HSPA1B,DNAJA4,CDKN1A,ATP2B1,ZNF516,MICA,ADM,DNAJC3
GO:0008285	negative regulation of cell population proliferation	92	669	0.18	0.0041	9606.ENSP00000209728,9606.ENSP00000216117,9606.ENSP00000216420,9606.ENSP00000228606,9606.ENSP00000228872,9606.ENSP00000239223,9606.ENSP00000244869,9606.ENSP00000245414,9606.ENSP00000249075,9606.ENSP00000249749,9606.ENSP00000251849,9606.ENSP00000254066,9606.ENSP00000254657,9606.ENSP00000256015,9606.ENSP00000260356,9606.ENSP00000263339,9606.ENSP00000264431,9606.ENSP00000264775,9606.ENSP00000265074,…	CDC6,HMOX1,CGRRF1,CYP27B1,CDKN1B,DUSP1,EREG,IRF1,LIF,DLL4,RAF1,RARA,PER2,BTG1,THBS1,IL1A,RAPGEF2,PPAP2A,NPR3,SRF,GAL,EMP3,FTH1,EAF2,CDKN2B,PAK1,FBXW7,FLCN,PPARG,BTG2,TSC1,IL12A,RNF139,CEBPB,CXCL8,PPM1D,FOSL1,TRIB1,PINX1,RNF10,KARS,IFNLR1,SMAD3,ARID2,OVOL1,ZBTB49,CAV1,SFN,JARID2,RNF41,BTG3,BTN2A2,TES,PELI1,ADARB1,ZEB1,DUSP10,PROX1,IRF6,ETV3,PRDM1,JUN,DLG5,ZNF503,SDC4,BAK1,KLF4,HSPA1B,ZBTB17,ING1,P…
GO:0001666	response to hypoxia	48	288	0.27	0.0041	9606.ENSP00000179259,9606.ENSP00000212015,9606.ENSP00000216117,9606.ENSP00000228872,9606.ENSP00000239938,9606.ENSP00000250457,9606.ENSP00000251849,9606.ENSP00000260356,9606.ENSP00000263980,9606.ENSP00000264832,9606.ENSP00000265354,9606.ENSP00000278568,9606.ENSP00000297991,9606.ENSP00000299767,9606.ENSP00000306124,9606.ENSP00000306864,9606.ENSP00000307260,9606.ENSP00000307305,9606.ENSP00000309968,…	C12orf5,SIRT1,HMOX1,CDKN1B,EGR1,EGLN3,RAF1,THBS1,SLC9A1,ICAM1,SRF,PAK1,AQP3,HSP90B1,PRKCE,VASN,TBL2,DDIT4,ADAM17,CFLAR,PMAIP1,P4HB,SMAD3,ZNF354A,CAV1,NR4A2,ARNT,ANKRD1,PLK3,PLAU,BMP2,RGCC,EDN1,NKX3-1,ETS1,SLC11A2,NFE2L2,BACH1,FOXO3,CREB1,SCFD1,CRYAB,ADM,UBC,CPEB2,CITED2,EGLN2,BIRC2
GO:0000209	protein polyubiquitination	42	240	0.29	0.0041	9606.ENSP00000209884,9606.ENSP00000237281,9606.ENSP00000247977,9606.ENSP00000256257,9606.ENSP00000262394,9606.ENSP00000281708,9606.ENSP00000282369,9606.ENSP00000301712,9606.ENSP00000304051,9606.ENSP00000306906,9606.ENSP00000317872,9606.ENSP00000320898,9606.ENSP00000322457,9606.ENSP00000323687,9606.ENSP00000330221,9606.ENSP00000342755,9606.ENSP00000347836,9606.ENSP00000348769,9606.ENSP00000349298,…	KLHL20,FBXO30,FBXL12,RNF122,WSB1,FBXW7,TRIM36,UNKL,RNF139,RNF181,RBBP6,RNF168,SIAH2,UBE2O,SPSB1,RNF41,UBE2H,ARIH2,MYLIP,TRIM38,PELI1,TOPORS,SMURF1,BTRC,TNKS2,LONRF3,RNF19B,SYVN1,TRIM5,UBE2E2,LONRF1,NEDD4L,UBE2J2,UBR5,LMO7,TRAF6,UBC,RNF111,RNF115,BIRC2,ITCH,TNFAIP3
GO:0032874	positive regulation of stress-activated MAPK cascade	30	148	0.35	0.0041	9606.ENSP00000013125,9606.ENSP00000056217,9606.ENSP00000215631,9606.ENSP00000220751,9606.ENSP00000259808,9606.ENSP00000260130,9606.ENSP00000262013,9606.ENSP00000264198,9606.ENSP00000278568,9606.ENSP00000284637,9606.ENSP00000287936,9606.ENSP00000294312,9606.ENSP00000296677,9606.ENSP00000310042,9606.ENSP00000316054,9606.ENSP00000325448,9606.ENSP00000356954,9606.ENSP00000360025,9606.ENSP00000360683,…	MAP4K5,ARHGEF5,GADD45B,RIPK2,RIPK1,SDCBP,SPAG9,MUL1,PAK1,SH3RF1,HMGCR,FGF19,F2RL1,ZNF622,DVL3,KARS,CTGF,GADD45A,PTPN1,ZC3H12A,DKK1,DAXX,BMP2,EDN1,XDH,TLR6,MAP2K4,CSB-PGBD3,TRAF6,MAP3K9
GO:0009605	response to external stimulus	246	2152	0.1	0.0042	9606.ENSP00000056217,9606.ENSP00000064780,9606.ENSP00000164024,9606.ENSP00000164227,9606.ENSP00000212015,9606.ENSP00000215904,9606.ENSP00000216037,9606.ENSP00000216117,9606.ENSP00000216489,9606.ENSP00000216797,9606.ENSP00000220751,9606.ENSP00000221452,9606.ENSP00000223095,9606.ENSP00000226574,9606.ENSP00000227752,9606.ENSP00000228606,9606.ENSP00000229332,9606.ENSP00000229416,9606.ENSP00000230361,…	ARHGEF5,RELT,CELSR3,BCL3,SIRT1,PDXP,XBP1,HMOX1,ALKBH1,NFKBIA,RIPK2,RELB,SERPINE1,NFKB1,IL10RA,CYP27B1,CLEC4A,GCLC,GUCA1B,HBEGF,TUSC2,ODC1,EGR1,KALRN,EGR2,IRF1,FOSB,TICAM1,RAF1,MICB,GDF15,JUND,SESN2,RARA,RRP8,EIF2S1,MBD2,IRAK2,BHLHE40,OASL,AKIRIN2,USP2,THBS1,LIPG,SEMA7A,PIK3C3,NLRC5,PRDX1,SLC9A1,ICAM1,LEF1,SRF,NRP1,GABARAPL1,ARNTL2,AKAP8,SIK1,SLC22A3,TNFRSF10B,CDKN2B,CCRN4L,FER,CA3,PPARG,HMGCR,IFN…
GO:0032101	regulation of response to external stimulus	123	955	0.16	0.0042	9606.ENSP00000216085,9606.ENSP00000216797,9606.ENSP00000220751,9606.ENSP00000221452,9606.ENSP00000223095,9606.ENSP00000226574,9606.ENSP00000228606,9606.ENSP00000229332,9606.ENSP00000230361,9606.ENSP00000244869,9606.ENSP00000245414,9606.ENSP00000248244,9606.ENSP00000251849,9606.ENSP00000252229,9606.ENSP00000256458,9606.ENSP00000257604,9606.ENSP00000259808,9606.ENSP00000260356,9606.ENSP00000261918,…	RHBDD3,NFKBIA,RIPK2,RELB,SERPINE1,NFKB1,CYP27B1,CLEC4A,GUCA1B,EREG,IRF1,TICAM1,RAF1,MICB,IRAK2,TRAFD1,RIPK1,THBS1,SEMA7A,PIK3C3,NLRC5,UFD1L,BRD4,BIRC3,MUL1,NRP1,FEM1A,PAK1,UBASH3B,PPARG,HMGCR,IFNGR2,STAT5B,CXCL3,CXCL5,F2RL1,HSP90B1,CRK,FADD,IL12A,ADORA2B,PRKCE,CXCL8,ADAM17,NR1D2,TRIB1,PER1,CLU,METRNL,MALT1,CALR,KARS,CSF1,IFNLR1,SOCS3,PDGFB,NPLOC4,SMAD3,NDEL1,POLR3C,STX3,CAV1,PLAUR,RIOK3,CREB3,MCP…
GO:0045862	positive regulation of proteolysis	55	347	0.25	0.0043	9606.ENSP00000157812,9606.ENSP00000171111,9606.ENSP00000212015,9606.ENSP00000216037,9606.ENSP00000220751,9606.ENSP00000229416,9606.ENSP00000250457,9606.ENSP00000257787,9606.ENSP00000259808,9606.ENSP00000260442,9606.ENSP00000264198,9606.ENSP00000274289,9606.ENSP00000276431,9606.ENSP00000281708,9606.ENSP00000287437,9606.ENSP00000287820,9606.ENSP00000295992,9606.ENSP00000301838,9606.ENSP00000304051,…	PSMC4,KEAP1,SIRT1,XBP1,RIPK2,GCLC,EGLN3,AKIRIN2,RIPK1,BCL2L10,MUL1,PLK2,TNFRSF10B,FBXW7,NSMCE2,PPARG,PCOLCE2,FADD,RNF139,EIF2AK3,TRIB1,CFLAR,DAB2,ZFAND2A,CLU,RCHY1,KARS,PMAIP1,SMAD3,CAV1,NRD1,ARIH2,VCP,SMURF1,CTGF,EFNA1,BTRC,BCL10,LONRF3,PLK3,ZC3H12A,RNF19B,MTCH1,BAK1,XDH,NKX3-1,SLC11A2,NFE2L2,MBP,LONRF1,PSME4,DIABLO,CYR61,HERPUD1,BCL2L13
GO:0043161	proteasome-mediated ubiquitin-dependent protein catabolic process	44	257	0.28	0.0044	9606.ENSP00000157812,9606.ENSP00000158771,9606.ENSP00000185150,9606.ENSP00000209884,9606.ENSP00000212015,9606.ENSP00000219313,9606.ENSP00000237455,9606.ENSP00000242719,9606.ENSP00000249356,9606.ENSP00000256257,9606.ENSP00000259335,9606.ENSP00000261942,9606.ENSP00000263202,9606.ENSP00000280758,9606.ENSP00000281708,9606.ENSP00000299767,9606.ENSP00000301738,9606.ENSP00000304051,9606.ENSP00000306906,…	PSMC4,DERL2,ERLEC1,KLHL20,SIRT1,PSMD7,RNF103,RNF11,DNAJB9,RNF122,KIAA0368,FAF2,UFD1L,BTBD11,FBXW7,HSP90B1,KCTD5,RNF139,RNF181,FBXO45,KCTD2,KLHL11,HSPA5,YOD1,NPLOC4,UBE2H,TRIM38,VCP,TOPORS,SMURF1,BTRC,SYVN1,NFE2L2,VIMP,NEDD4L,UBE2J2,ARNTL,ABTB2,UBC,DDIT3,RNF111,RNF115,BIRC2,ITCH
GO:0030308	negative regulation of cell growth	32	164	0.34	0.0045	9606.ENSP00000212015,9606.ENSP00000228606,9606.ENSP00000228872,9606.ENSP00000235382,9606.ENSP00000253063,9606.ENSP00000256015,9606.ENSP00000264198,9606.ENSP00000265342,9606.ENSP00000265371,9606.ENSP00000265643,9606.ENSP00000273668,9606.ENSP00000278568,9606.ENSP00000285071,9606.ENSP00000287820,9606.ENSP00000318804,9606.ENSP00000319482,9606.ENSP00000325414,9606.ENSP00000332973,9606.ENSP00000349616,…	SIRT1,CYP27B1,CDKN1B,RGS2,SESN2,BTG1,MUL1,FSTL4,NRP1,GAL,EAF2,PAK1,FLCN,PPARG,CRLF3,DCUN1D3,SERTAD3,SMAD3,ADIPOR2,MAP2,ENPP1,OSGIN1,TSPYL2,HSPA1B,ING1,BCL6,CDKN1A,SH3BP4,OSGIN2,PPP2CA,CDKN2AIP,CRYAB
GO:0000079	regulation of cyclin-dependent protein serine/threonine kinase activity	21	86	0.43	0.0045	9606.ENSP00000209728,9606.ENSP00000228872,9606.ENSP00000261254,9606.ENSP00000264157,9606.ENSP00000265963,9606.ENSP00000276925,9606.ENSP00000295926,9606.ENSP00000303706,9606.ENSP00000309968,9606.ENSP00000330382,9606.ENSP00000335628,9606.ENSP00000340989,9606.ENSP00000342344,9606.ENSP00000350633,9606.ENSP00000355925,9606.ENSP00000360025,9606.ENSP00000362608,9606.ENSP00000368664,9606.ENSP00000372035,…	CDC6,CDKN1B,CCND2,CCNT2,GTF2H1,CDKN2B,CCNL1,CDC25A,ADAM17,PDGFB,SPDYA,SFN,CCNYL1,SERTAD1,PROX1,GADD45A,PIM1,RGCC,LATS2,CDKN1A,TNFAIP3
GO:0034470	ncRNA processing	54	340	0.25	0.0046	9606.ENSP00000199320,9606.ENSP00000212015,9606.ENSP00000216038,9606.ENSP00000216489,9606.ENSP00000230340,9606.ENSP00000244230,9606.ENSP00000254605,9606.ENSP00000256398,9606.ENSP00000261708,9606.ENSP00000274695,9606.ENSP00000283109,9606.ENSP00000296792,9606.ENSP00000297990,9606.ENSP00000297994,9606.ENSP00000301364,9606.ENSP00000306565,9606.ENSP00000308179,9606.ENSP00000308332,9606.ENSP00000310260,…	DIMT1,SIRT1,RTCB,ALKBH1,BYSL,MPHOSPH10,RRP8,ELP3,UTP6,CDKAL1,RIOK2,UTP15,NOL6,TRMT10B,TSR1,ISG20,WDR3,UTP23,INTS6,TRMT10C,WDR75,RRS1,RPUSD2,ISG20L2,KARS,CIRH1A,SMAD3,RIOK3,WDR37,WDR55,MDN1,PDCD11,TOE1,YRDC,AGO3,TEX10,ZCCHC6,RIOK1,NOP2,TRMT44,UTP14A,WDR43,POP1,CHD7,EXOSC6,MTO1,INTS12,QTRTD1,THUMPD2,INTS4,CLP1,NOL8,RPP38,SRRT
GO:0009991	response to extracellular stimulus	71	486	0.21	0.0047	9606.ENSP00000212015,9606.ENSP00000215904,9606.ENSP00000216037,9606.ENSP00000216117,9606.ENSP00000228606,9606.ENSP00000229416,9606.ENSP00000252809,9606.ENSP00000253063,9606.ENSP00000254066,9606.ENSP00000254605,9606.ENSP00000256383,9606.ENSP00000256429,9606.ENSP00000261292,9606.ENSP00000262039,9606.ENSP00000264832,9606.ENSP00000265354,9606.ENSP00000266458,9606.ENSP00000275300,9606.ENSP00000276925,…	SIRT1,PDXP,XBP1,HMOX1,CYP27B1,GCLC,GDF15,SESN2,RARA,RRP8,EIF2S1,MBD2,LIPG,PIK3C3,ICAM1,SRF,GABARAPL1,SLC22A3,CDKN2B,CCRN4L,PPARG,HMGCR,AQP3,TSC1,HSP90B1,FOXA3,ADORA2B,FOS,PPM1D,EIF2AK3,TBL2,FOSL1,SSH1,HMGCS1,HSPA5,PMAIP1,UPP1,ZNF354A,CAV1,MIOS,ATF3,NR4A2,ADIPOR2,P2RX4,PROX1,NUAK2,GLRX2,ADRB1,GCLM,BCL10,JUN,RRAGC,SLC25A25,ZC3H12A,PIM1,SRSF2,NFE2L2,RELA,MTMR3,CDKN1A,FOXO3,CREB1,ATP2B1,CADPS2,FNIP1,…
GO:0051091	positive regulation of DNA-binding transcription factor activity	43	250	0.28	0.0047	9606.ENSP00000056217,9606.ENSP00000220751,9606.ENSP00000226574,9606.ENSP00000248244,9606.ENSP00000256458,9606.ENSP00000259808,9606.ENSP00000262294,9606.ENSP00000264832,9606.ENSP00000265026,9606.ENSP00000265354,9606.ENSP00000268184,9606.ENSP00000278070,9606.ENSP00000281092,9606.ENSP00000287820,9606.ENSP00000295704,9606.ENSP00000300086,9606.ENSP00000303634,9606.ENSP00000310170,9606.ENSP00000312455,…	ARHGEF5,RIPK2,NFKB1,TICAM1,IRAK2,RIPK1,TRIM37,ICAM1,MAP3K13,SRF,CRTC3,PPRC1,FER,PPARG,RNF25,TERF2IP,LRP8,FOSL1,CFLAR,CLU,MALT1,RIPK4,SMAD3,RNF41,TRIM38,DDR2,CRTC2,NFKB2,CHUK,BCL10,PPAP2B,HSPA1B,RGCC,EDN1,DDX58,TRIM5,RELA,TLR6,TRAF6,UBC,DDIT3,RPS6KA5,IKBKG
GO:0010243	response to organonitrogen compound	114	876	0.16	0.0049	9606.ENSP00000157812,9606.ENSP00000158771,9606.ENSP00000185150,9606.ENSP00000209728,9606.ENSP00000212015,9606.ENSP00000215904,9606.ENSP00000216037,9606.ENSP00000216797,9606.ENSP00000220751,9606.ENSP00000226574,9606.ENSP00000228872,9606.ENSP00000229416,9606.ENSP00000235382,9606.ENSP00000237455,9606.ENSP00000239223,9606.ENSP00000239938,9606.ENSP00000240874,9606.ENSP00000242480,9606.ENSP00000244869,…	PSMC4,DERL2,ERLEC1,CDC6,SIRT1,PDXP,XBP1,NFKBIA,RIPK2,NFKB1,CDKN1B,GCLC,RGS2,RNF103,DUSP1,EGR1,KALRN,EGR2,EREG,INSIG2,FOSB,TICAM1,SDF2L1,DNAJB9,JUND,SESN2,JAG1,BTG1,KIAA0368,FAF2,PIK3C3,UFD1L,SLC9A1,RAPGEF2,ICAM1,GAL,EIF2B2,NPC1,PAK1,FER,QDPR,CA2,PPARG,BTG2,STAT5B,TSC1,HSP90B1,CRK,FADD,JUNB,RNF139,CEBPB,PRKCE,FOS,SLC25A33,YWHAG,FOSL1,CFLAR,PER1,SSH1,HMGCS1,HSPA5,PPP2R2A,YOD1,NPLOC4,PDE4B,NDEL1,HOM…
GO:0006468	protein phosphorylation	119	923	0.16	0.005	9606.ENSP00000013125,9606.ENSP00000216085,9606.ENSP00000220751,9606.ENSP00000224140,9606.ENSP00000226574,9606.ENSP00000228872,9606.ENSP00000229395,9606.ENSP00000230990,9606.ENSP00000240874,9606.ENSP00000244869,9606.ENSP00000246914,9606.ENSP00000249075,9606.ENSP00000251849,9606.ENSP00000254066,9606.ENSP00000254101,9606.ENSP00000256383,9606.ENSP00000256458,9606.ENSP00000258770,9606.ENSP00000258774,…	MAP4K5,RHBDD3,RIPK2,SETX,NFKB1,CDKN1B,FGFR1OP2,HBEGF,KALRN,EREG,WNK4,LIF,RAF1,RARA,PRKAB2,EIF2S1,IRAK2,TBRG4,HUS1,RIPK1,MAPK6,SPAG9,PIK3C3,MAP3K8,ACVR1,MAP4K3,CCNT2,MUL1,RAPGEF2,MAP3K13,NRP1,GTF2H1,SIK1,PLK2,PAK1,FER,RIOK2,PRKAG2,BRAF,STAT5B,FGF19,SNRK,AURKC,ADORA2B,PRKCE,PPM1D,EIF2AK3,TRIB1,TLK2,CLK4,PIBF1,STK17A,KARS,PDGFB,RIPK4,RIOK3,MAP2K3,PDGFA,EPHA2,PELI1,PIM3,AKAP13,RPS6KC1,DYRK3,NUAK2,RAS…
GO:0030522	intracellular receptor signaling pathway	33	173	0.33	0.005	9606.ENSP00000216797,9606.ENSP00000220751,9606.ENSP00000251871,9606.ENSP00000254066,9606.ENSP00000256458,9606.ENSP00000264775,9606.ENSP00000265372,9606.ENSP00000287820,9606.ENSP00000310006,9606.ENSP00000314879,9606.ENSP00000320866,9606.ENSP00000344479,9606.ENSP00000345826,9606.ENSP00000362608,9606.ENSP00000363668,9606.ENSP00000369213,9606.ENSP00000370253,9606.ENSP00000380888,9606.ENSP00000384273,…	NFKBIA,RIPK2,MED17,RARA,IRAK2,PPAP2A,CREM,PPARG,NR1D2,ALOXE3,CALR,NR4A2,PMEPA1,PIM1,DAXX,DDX58,NKX3-1,MED13,RELA,KDM3A,FHL2,CYLD,NR6A1,UBR5,TRAF6,NR4A1,UBC,EGLN2,CRY2,ITCH,TNFAIP3,NR4A3,IKBKG
GO:0031347	regulation of defense response	92	676	0.18	0.0053	9606.ENSP00000216085,9606.ENSP00000216797,9606.ENSP00000220751,9606.ENSP00000221452,9606.ENSP00000223095,9606.ENSP00000226574,9606.ENSP00000229332,9606.ENSP00000244869,9606.ENSP00000245414,9606.ENSP00000248244,9606.ENSP00000251849,9606.ENSP00000252229,9606.ENSP00000256458,9606.ENSP00000257604,9606.ENSP00000259808,9606.ENSP00000261918,9606.ENSP00000262039,9606.ENSP00000262510,9606.ENSP00000263202,…	RHBDD3,NFKBIA,RIPK2,RELB,SERPINE1,NFKB1,CLEC4A,EREG,IRF1,TICAM1,RAF1,MICB,IRAK2,TRAFD1,RIPK1,SEMA7A,PIK3C3,NLRC5,UFD1L,BRD4,BIRC3,MUL1,FEM1A,PAK1,PPARG,IFNGR2,STAT5B,F2RL1,HSP90B1,CRK,FADD,IL12A,ADORA2B,PRKCE,NR1D2,PER1,CLU,METRNL,MALT1,KARS,IFNLR1,SOCS3,NPLOC4,SMAD3,POLR3C,CAV1,RIOK3,CREB3,MCPH1,PSPC1,TRIM38,SFPQ,ANKRD17,PELI1,GPATCH3,DUSP10,CHUK,BCL10,PTPN1,ZC3H12A,PTAFR,KLF4,HSPA1B,HLA-E,OPTN,…
GO:0006796	phosphate-containing compound metabolic process	236	2065	0.1	0.0056	9606.ENSP00000013125,9606.ENSP00000179259,9606.ENSP00000200453,9606.ENSP00000215904,9606.ENSP00000216085,9606.ENSP00000220751,9606.ENSP00000221086,9606.ENSP00000222553,9606.ENSP00000224140,9606.ENSP00000226574,9606.ENSP00000227868,9606.ENSP00000228872,9606.ENSP00000229395,9606.ENSP00000230990,9606.ENSP00000232607,9606.ENSP00000237264,9606.ENSP00000239223,9606.ENSP00000240874,9606.ENSP00000244869,…	MAP4K5,C12orf5,PPP1R15A,PDXP,RHBDD3,RIPK2,MTMR9,NAMPT,SETX,NFKB1,PDHX,CDKN1B,FGFR1OP2,HBEGF,UMPS,TBPL1,DUSP1,KALRN,EREG,WNK4,LIF,RAF1,RARA,PRKAB2,ILKAP,EIF2S1,IRAK2,TBRG4,HUS1,RIPK1,EPT1,LIPG,COX10,MAPK6,SPAG9,PIK3C3,PGS1,MAP3K8,ITPKC,ACVR1,MAP4K3,LCAT,CCNT2,MUL1,PIKFYVE,RAPGEF2,PPAP2A,MAP3K13,NRP1,CHKA,GTF2H1,SIK1,SLC20A1,RAB5A,PLK2,PAK1,PPP4C,FER,RIOK2,PTPRR,UBASH3B,CA3,PRKAG2,HMGCR,IPPK,BRAF,D…
GO:0009267	cellular response to starvation	28	137	0.36	0.0056	9606.ENSP00000212015,9606.ENSP00000216037,9606.ENSP00000253063,9606.ENSP00000254605,9606.ENSP00000256383,9606.ENSP00000262039,9606.ENSP00000266458,9606.ENSP00000304004,9606.ENSP00000306682,9606.ENSP00000307235,9606.ENSP00000307260,9606.ENSP00000324173,9606.ENSP00000326119,9606.ENSP00000330032,9606.ENSP00000339191,9606.ENSP00000339881,9606.ENSP00000344352,9606.ENSP00000356125,9606.ENSP00000360266,…	SIRT1,XBP1,SESN2,RRP8,EIF2S1,PIK3C3,GABARAPL1,FOXA3,PPM1D,EIF2AK3,TBL2,HSPA5,PMAIP1,UPP1,CAV1,MIOS,ATF3,NUAK2,JUN,RRAGC,ZC3H12A,NFE2L2,MTMR3,CDKN1A,CADPS2,FNIP1,ZFYVE1,BHLHA15
GO:0043414	macromolecule methylation	40	229	0.29	0.0057	9606.ENSP00000199320,9606.ENSP00000228437,9606.ENSP00000235372,9606.ENSP00000256015,9606.ENSP00000264183,9606.ENSP00000264668,9606.ENSP00000290551,9606.ENSP00000297591,9606.ENSP00000297994,9606.ENSP00000300209,9606.ENSP00000306245,9606.ENSP00000306682,9606.ENSP00000308546,9606.ENSP00000312356,9606.ENSP00000314396,9606.ENSP00000317177,9606.ENSP00000319169,9606.ENSP00000325326,9606.ENSP00000339566,…	DIMT1,PRDM4,PRDM2,BTG1,ARID4B,MTRR,BTG2,KIAA1429,TRMT10B,METTL21B,FOS,PPM1D,MEPCE,TRMT10C,PRMT9,PLD6,PRMT5,ZNF335,HIST1H1C,ARID4A,PIWIL2,WTAP,ETF1,CTR9,RBM15,RLF,KDM6A,METTL22,NOP2,RNMT,TRMT44,VCPKMT,SETD4,KDM3A,CBLL1,MTO1,ZFP57,THUMPD2,TET2,NTMT1
GO:0035994	response to muscle stretch	9	18	0.74	0.0058	9606.ENSP00000216797,9606.ENSP00000226574,9606.ENSP00000251849,9606.ENSP00000263980,9606.ENSP00000306245,9606.ENSP00000360266,9606.ENSP00000360762,9606.ENSP00000368683,9606.ENSP00000384273	NFKBIA,NFKB1,RAF1,SLC9A1,FOS,JUN,ANKRD1,EDN1,RELA
GO:0016032	viral process	80	571	0.19	0.0061	9606.ENSP00000212015,9606.ENSP00000216797,9606.ENSP00000217402,9606.ENSP00000220509,9606.ENSP00000227520,9606.ENSP00000234420,9606.ENSP00000248248,9606.ENSP00000252229,9606.ENSP00000259808,9606.ENSP00000263377,9606.ENSP00000264157,9606.ENSP00000264832,9606.ENSP00000267202,9606.ENSP00000268184,9606.ENSP00000269228,9606.ENSP00000273047,9606.ENSP00000273130,9606.ENSP00000281456,9606.ENSP00000281708,…	SIRT1,NFKBIA,CHMP4B,VPS18,CCDC86,MSH6,MON1B,MICB,RIPK1,BRD4,CCNT2,ICAM1,VPS37B,CRTC3,NPC1,RAB5A,DYNC1LI1,SLC25A4,FBXW7,GTF2E1,ITGA5,UBAP1,KCTD5,FADD,CFLAR,NUP98,VPS37A,SUPT6H,MMP1,KARS,KPNA7,SMAD3,CAV1,SLC20A2,CREB3,NUP50,TBC1D20,TAP1,UVRAG,EPHA2,ANKRD17,VCP,NUP214,RAET1L,F11R,CRTC2,EIF3A,RBM15,BTRC,ZC3H12A,DAXX,UBR4,HSPA1B,NMT2,NFX1,DDX58,TRIM5,GPS2,ITSN1,RSAD2,ATG16L1,TBP,AP1G1,POM121,RAE1,UBN1…
GO:1903322	positive regulation of protein modification by small protein conjugation or removal	27	131	0.36	0.0063	9606.ENSP00000220751,9606.ENSP00000248244,9606.ENSP00000260247,9606.ENSP00000263464,9606.ENSP00000264198,9606.ENSP00000265138,9606.ENSP00000268042,9606.ENSP00000281708,9606.ENSP00000296257,9606.ENSP00000314733,9606.ENSP00000319279,9606.ENSP00000319482,9606.ENSP00000321239,9606.ENSP00000324173,9606.ENSP00000339191,9606.ENSP00000349547,9606.ENSP00000351407,9606.ENSP00000351777,9606.ENSP00000351789,…	RIPK2,TICAM1,DCUN1D5,BIRC3,MUL1,ARRDC3,ARRDC4,FBXW7,SENP2,TOLLIP,MALT1,DCUN1D3,RCHY1,HSPA5,CAV1,RASSF1,ARNT,VCP,PELI1,TOPORS,CTR9,BCL10,ZC3H12A,DCUN1D2,TRAF6,RNF111,BIRC2
GO:0010508	positive regulation of autophagy	23	103	0.39	0.0066	9606.ENSP00000212015,9606.ENSP00000216037,9606.ENSP00000216117,9606.ENSP00000220751,9606.ENSP00000248244,9606.ENSP00000253063,9606.ENSP00000264198,9606.ENSP00000274289,9606.ENSP00000285071,9606.ENSP00000298552,9606.ENSP00000331748,9606.ENSP00000346986,9606.ENSP00000348455,9606.ENSP00000354621,9606.ENSP00000361275,9606.ENSP00000362179,9606.ENSP00000363943,9606.ENSP00000365692,9606.ENSP00000365757,…	SIRT1,XBP1,HMOX1,RIPK2,TICAM1,SESN2,MUL1,PLK2,FLCN,TSC1,RAB12,WAC,UVRAG,SMURF1,PLK3,ZC3H12A,TP53INP2,PIM2,PIP4K2A,OPTN,SH3BP4,C9orf72,IKBKG
GO:0042035	regulation of cytokine biosynthetic process	22	96	0.41	0.0066	9606.ENSP00000164227,9606.ENSP00000216117,9606.ENSP00000226574,9606.ENSP00000239938,9606.ENSP00000244869,9606.ENSP00000245414,9606.ENSP00000248244,9606.ENSP00000260356,9606.ENSP00000263339,9606.ENSP00000264607,9606.ENSP00000293328,9606.ENSP00000305422,9606.ENSP00000345083,9606.ENSP00000359612,9606.ENSP00000362965,9606.ENSP00000363804,9606.ENSP00000366702,9606.ENSP00000371634,9606.ENSP00000384273,…	BCL3,HMOX1,NFKB1,EGR1,EREG,IRF1,TICAM1,THBS1,IL1A,ASB1,STAT5B,CEBPB,MAP2K3,BCL10,PTAFR,KLF4,ERRFI1,IGF2BP2,RELA,TLR6,TRAF6,ZFP36
GO:1902107	positive regulation of leukocyte differentiation	28	139	0.35	0.0067	9606.ENSP00000216037,9606.ENSP00000220751,9606.ENSP00000245817,9606.ENSP00000249075,9606.ENSP00000254066,9606.ENSP00000259808,9606.ENSP00000262710,9606.ENSP00000265165,9606.ENSP00000285379,9606.ENSP00000293328,9606.ENSP00000300305,9606.ENSP00000301838,9606.ENSP00000303231,9606.ENSP00000306245,9606.ENSP00000312150,9606.ENSP00000318057,9606.ENSP00000319279,9606.ENSP00000325663,9606.ENSP00000327513,…	XBP1,RIPK2,TNFSF9,LIF,RARA,RIPK1,ACIN1,LEF1,CA2,STAT5B,RUNX1,FADD,IL12A,FOS,TRIB1,EGR3,MALT1,NFKBIZ,CSF1,DUSP10,PRDM1,JUN,CD83,IL4R,BCL6,CREB1,CYLD,TRAF6
GO:0044087	regulation of cellular component biogenesis	112	867	0.16	0.0069	9606.ENSP00000056217,9606.ENSP00000157812,9606.ENSP00000198767,9606.ENSP00000199320,9606.ENSP00000217402,9606.ENSP00000220509,9606.ENSP00000222812,9606.ENSP00000224140,9606.ENSP00000228872,9606.ENSP00000236925,9606.ENSP00000243045,9606.ENSP00000244050,9606.ENSP00000251849,9606.ENSP00000254322,9606.ENSP00000254810,9606.ENSP00000256001,9606.ENSP00000260130,9606.ENSP00000260356,9606.ENSP00000260643,…	ARHGEF5,PSMC4,RRN3,DIMT1,CHMP4B,VPS18,STX1A,SETX,CDKN1B,CAMSAP2,ORMDL2,SNAI1,RAF1,DNAJB1,H3F3B,ACTR3B,SDCBP,THBS1,PREB,TRIM37,SLC9A1,LCAT,SLAIN2,PIKFYVE,RAPGEF2,ICAM1,SRF,NRP1,GTF2H1,RAB5A,PLK2,PAK1,FER,TJP1,RIOK2,WHAMM,CDC42EP3,MITF,ICE1,F2RL1,UTP15,TSC1,RUNX1,PRKCE,FOSL1,WDR75,CLU,SSH1,MMP1,AMIGO3,PMAIP1,ATAT1,SMAD3,NDEL1,SPTY2D1,CAV1,RIOK3,DPYSL3,INSIG1,ARPC5L,PMEPA1,OCLN,DYNC1H1,EPHA2,VCP,KIR…
GO:1903708	positive regulation of hemopoiesis	33	177	0.32	0.0069	9606.ENSP00000216037,9606.ENSP00000220751,9606.ENSP00000245817,9606.ENSP00000249075,9606.ENSP00000254066,9606.ENSP00000254958,9606.ENSP00000259808,9606.ENSP00000262710,9606.ENSP00000265165,9606.ENSP00000285379,9606.ENSP00000293328,9606.ENSP00000300305,9606.ENSP00000301838,9606.ENSP00000303231,9606.ENSP00000306245,9606.ENSP00000312150,9606.ENSP00000318057,9606.ENSP00000319279,9606.ENSP00000325663,…	XBP1,RIPK2,TNFSF9,LIF,RARA,JAG1,RIPK1,ACIN1,LEF1,CA2,STAT5B,RUNX1,FADD,IL12A,FOS,TRIB1,EGR3,MALT1,NFKBIZ,CSF1,ARNT,DUSP10,PRDM1,JUN,HSPA1B,CD83,ETS1,IL4R,BCL6,FOXO3,CREB1,CYLD,TRAF6
GO:0072358	cardiovascular system development	71	496	0.2	0.0075	9606.ENSP00000212015,9606.ENSP00000216037,9606.ENSP00000216117,9606.ENSP00000223095,9606.ENSP00000237937,9606.ENSP00000239938,9606.ENSP00000244869,9606.ENSP00000249075,9606.ENSP00000249749,9606.ENSP00000254958,9606.ENSP00000257566,9606.ENSP00000260356,9606.ENSP00000262225,9606.ENSP00000262947,9606.ENSP00000263062,9606.ENSP00000263640,9606.ENSP00000264036,9606.ENSP00000264431,9606.ENSP00000265165,…	SIRT1,XBP1,HMOX1,SERPINE1,ZFAND5,EGR1,EREG,LIF,DLL4,JAG1,TBX3,THBS1,TMED2,C19orf10,EPC1,ACVR1,MCAM,RAPGEF2,LEF1,SRF,NRP1,RHOB,FBXW7,ITGA5,DCTN5,JUNB,LUZP1,CXCL8,EIF2AK3,FOSL1,HEG1,EGR3,TNFRSF12A,SOCS3,PDGFB,ARID2,CAV1,PDGFA,DHCR7,NRARP,ADIPOR2,EPHA2,ANKRD17,PROX1,CTGF,EFNA1,NUS1,ECM1,PRDM1,RBM15,NSDHL,JUN,ZC3H12A,BAK1,ERRFI1,SHB,KDM6A,EDN1,NKX3-1,ETS1,AIMP1,C1GALT1,CHD7,JMJD6,CYR61,GNA13,TIPARP,A…
GO:0001944	vasculature development	70	487	0.2	0.0075	9606.ENSP00000212015,9606.ENSP00000216037,9606.ENSP00000216117,9606.ENSP00000223095,9606.ENSP00000237937,9606.ENSP00000239938,9606.ENSP00000244869,9606.ENSP00000249075,9606.ENSP00000249749,9606.ENSP00000254958,9606.ENSP00000257566,9606.ENSP00000260356,9606.ENSP00000262225,9606.ENSP00000262947,9606.ENSP00000263062,9606.ENSP00000263640,9606.ENSP00000264036,9606.ENSP00000264431,9606.ENSP00000265165,…	SIRT1,XBP1,HMOX1,SERPINE1,ZFAND5,EGR1,EREG,LIF,DLL4,JAG1,TBX3,THBS1,TMED2,C19orf10,EPC1,ACVR1,MCAM,RAPGEF2,LEF1,SRF,NRP1,RHOB,FBXW7,ITGA5,DCTN5,JUNB,LUZP1,CXCL8,EIF2AK3,FOSL1,HEG1,EGR3,TNFRSF12A,SOCS3,PDGFB,ARID2,CAV1,PDGFA,DHCR7,NRARP,ADIPOR2,EPHA2,ANKRD17,PROX1,CTGF,EFNA1,NUS1,ECM1,PRDM1,RBM15,NSDHL,JUN,ZC3H12A,BAK1,ERRFI1,SHB,EDN1,NKX3-1,ETS1,AIMP1,C1GALT1,CHD7,JMJD6,CYR61,GNA13,TIPARP,ADM,NR4…
GO:0070646	protein modification by small protein removal	47	290	0.25	0.0075	9606.ENSP00000157812,9606.ENSP00000171111,9606.ENSP00000216039,9606.ENSP00000216797,9606.ENSP00000219313,9606.ENSP00000255304,9606.ENSP00000259808,9606.ENSP00000260187,9606.ENSP00000261712,9606.ENSP00000263202,9606.ENSP00000263464,9606.ENSP00000264639,9606.ENSP00000282344,9606.ENSP00000296257,9606.ENSP00000303706,9606.ENSP00000306528,9606.ENSP00000308022,9606.ENSP00000309163,9606.ENSP00000322457,…	PSMC4,KEAP1,JOSD1,NFKBIA,PSMD7,USPL1,RIPK1,USP2,PSMD11,UFD1L,BIRC3,PSMD3,USP12,SENP2,CDC25A,DESI2,TADA2B,RCE1,SIAH2,YOD1,SMAD3,VCP,ZRANB1,INO80,ZC3H12A,OTUD3,UIMC1,STAM,DDX58,STAMBP,USP49,USP8,USP25,ASXL2,PSME4,CYLD,USP53,TRAF6,NFRKB,ATXN7,USP36,UBC,TRAF3,OTUD7B,BIRC2,TNFAIP3,IKBKG
GO:0008283	cell population proliferation	91	676	0.17	0.0076	9606.ENSP00000198767,9606.ENSP00000216037,9606.ENSP00000216117,9606.ENSP00000220751,9606.ENSP00000227322,9606.ENSP00000228437,9606.ENSP00000230340,9606.ENSP00000232496,9606.ENSP00000239938,9606.ENSP00000240874,9606.ENSP00000242728,9606.ENSP00000244869,9606.ENSP00000245817,9606.ENSP00000251849,9606.ENSP00000252891,9606.ENSP00000254250,9606.ENSP00000254810,9606.ENSP00000255304,9606.ENSP00000261292,…	RRN3,XBP1,HMOX1,RIPK2,ZPR1,PRDM4,BYSL,TUSC2,EGR1,KALRN,BHLHE41,EREG,TNFSF9,RAF1,NUMBL,THAP1,H3F3B,USPL1,LIPG,LHX5,PRDX1,IL1A,MXD1,CDV3,GOLPH3,NPR3,LEF1,PELO,FER,TGFA,F2RL1,DAGLB,RUNX1,IL12A,JUNB,CDC25A,CEBPB,ISG20,DDIT4,ELF4,DAB2,CLU,PRMT5,MALT1,C3orf58,CSF1,NDEL1,ARID2,SRA1,INSIG1,NRD1,ARIH2,NRARP,EPHA2,ZEB1,CDC14A,NAA35,PROX1,IRF6,BLZF1,DDR2,CTGF,YY1AP1,PRDM1,ASCC3,BTRC,ZNF503,PIM1,BAK1,PIM2,BM…
GO:0071407	cellular response to organic cyclic compound	72	505	0.2	0.0076	9606.ENSP00000215904,9606.ENSP00000216797,9606.ENSP00000226574,9606.ENSP00000228872,9606.ENSP00000229416,9606.ENSP00000239938,9606.ENSP00000251871,9606.ENSP00000254066,9606.ENSP00000256429,9606.ENSP00000263980,9606.ENSP00000264198,9606.ENSP00000264431,9606.ENSP00000264775,9606.ENSP00000264832,9606.ENSP00000265165,9606.ENSP00000269228,9606.ENSP00000287820,9606.ENSP00000296215,9606.ENSP00000299767,…	PDXP,NFKBIA,NFKB1,CDKN1B,GCLC,EGR1,MED17,RARA,MBD2,SLC9A1,MUL1,RAPGEF2,PPAP2A,ICAM1,LEF1,NPC1,PPARG,SNIP1,HSP90B1,LRP8,CEBPB,DDIT4,PDE12,NR1D2,CFLAR,SSH1,CALR,HMGCS1,HSPA5,PDGFB,PDE4B,SMAD3,CAV1,RIOK3,NR4A2,INSIG1,PMEPA1,P2RX4,CASP7,BTRC,GCLM,ABCC2,ANKRD1,ZC3H12A,AGO3,PIM1,PTAFR,DAXX,KLF4,ZCCHC6,ERRFI1,BMP2,EDN1,DDX58,NKX3-1,RAE1,USP8,HRH1,MED13,TMF1,FOXO3,KDM3A,FHL2,ATP2B1,NR6A1,TIPARP,UBR5,NR4A…
GO:0033043	regulation of organelle organization	142	1155	0.13	0.0077	9606.ENSP00000056217,9606.ENSP00000179259,9606.ENSP00000202556,9606.ENSP00000209728,9606.ENSP00000212015,9606.ENSP00000215904,9606.ENSP00000216037,9606.ENSP00000217402,9606.ENSP00000220509,9606.ENSP00000225174,9606.ENSP00000228872,9606.ENSP00000236925,9606.ENSP00000238789,9606.ENSP00000239223,9606.ENSP00000244869,9606.ENSP00000249075,9606.ENSP00000252992,9606.ENSP00000254810,9606.ENSP00000256001,…	ARHGEF5,C12orf5,PPP1R13B,CDC6,SIRT1,PDXP,XBP1,CHMP4B,VPS18,PPIF,CDKN1B,CAMSAP2,ATAD2B,DUSP1,EREG,LIF,CEP85,H3F3B,ACTR3B,SDCBP,PREB,TRIM37,IL1A,SLC9A1,MUL1,SLAIN2,PIKFYVE,ICAM1,GOLPH3,NRP1,JDP2,AKAP8,RAB5A,DYNC1LI1,PLK2,PAK1,FER,FBXW7,TRIM36,NIPBL,RIOK2,FLCN,WHAMM,NSMCE2,STX5,CDC42EP3,TGFA,KIAA0226,F2RL1,TSC1,TERF2IP,CRK,PRKCE,YWHAG,TADA2B,CLU,SSH1,TLK2,PLD6,PINX1,SUPT6H,PRMT5,CALR,ZNF335,PMAIP1,M…
GO:0016579	protein deubiquitination	45	275	0.26	0.0081	9606.ENSP00000157812,9606.ENSP00000171111,9606.ENSP00000216039,9606.ENSP00000216797,9606.ENSP00000219313,9606.ENSP00000259808,9606.ENSP00000260187,9606.ENSP00000261712,9606.ENSP00000263202,9606.ENSP00000263464,9606.ENSP00000264639,9606.ENSP00000282344,9606.ENSP00000303706,9606.ENSP00000306528,9606.ENSP00000308022,9606.ENSP00000309163,9606.ENSP00000322457,9606.ENSP00000326813,9606.ENSP00000332973,…	PSMC4,KEAP1,JOSD1,NFKBIA,PSMD7,RIPK1,USP2,PSMD11,UFD1L,BIRC3,PSMD3,USP12,CDC25A,DESI2,TADA2B,RCE1,SIAH2,YOD1,SMAD3,VCP,ZRANB1,INO80,ZC3H12A,OTUD3,UIMC1,STAM,DDX58,STAMBP,USP49,USP8,USP25,ASXL2,PSME4,CYLD,USP53,TRAF6,NFRKB,ATXN7,USP36,UBC,TRAF3,OTUD7B,BIRC2,TNFAIP3,IKBKG
GO:0050688	regulation of defense response to virus	18	71	0.45	0.0081	9606.ENSP00000252229,9606.ENSP00000263202,9606.ENSP00000263464,9606.ENSP00000264198,9606.ENSP00000327824,9606.ENSP00000331487,9606.ENSP00000341874,9606.ENSP00000342136,9606.ENSP00000349596,9606.ENSP00000351416,9606.ENSP00000354645,9606.ENSP00000362179,9606.ENSP00000369213,9606.ENSP00000376268,9606.ENSP00000454207,9606.ENSP00000477613,9606.ENSP00000480499,9606.ENSP00000481570	MICB,UFD1L,BIRC3,MUL1,IFNLR1,NPLOC4,RIOK3,CREB3,TRIM38,ANKRD17,GPATCH3,ZC3H12A,DDX58,SEC14L1,TRAF3,BIRC2,ITCH,TNFAIP3
GO:0071453	cellular response to oxygen levels	31	164	0.32	0.0083	9606.ENSP00000179259,9606.ENSP00000212015,9606.ENSP00000216117,9606.ENSP00000239938,9606.ENSP00000250457,9606.ENSP00000263980,9606.ENSP00000264832,9606.ENSP00000287820,9606.ENSP00000292114,9606.ENSP00000297991,9606.ENSP00000298552,9606.ENSP00000306124,9606.ENSP00000306864,9606.ENSP00000307260,9606.ENSP00000312455,9606.ENSP00000326119,9606.ENSP00000327801,9606.ENSP00000339191,9606.ENSP00000351407,…	C12orf5,SIRT1,HMOX1,EGR1,EGLN3,SLC9A1,ICAM1,PPARG,TMEM199,AQP3,TSC1,PRKCE,VASN,TBL2,CFLAR,PMAIP1,P4HB,CAV1,ARNT,ANKRD1,PLK3,RGCC,EDN1,NKX3-1,NFE2L2,BACH1,FOXO3,UBC,CPEB2,CITED2,EGLN2
GO:0002832	negative regulation of response to biotic stimulus	20	85	0.42	0.0088	9606.ENSP00000252229,9606.ENSP00000257604,9606.ENSP00000262510,9606.ENSP00000263202,9606.ENSP00000264198,9606.ENSP00000287820,9606.ENSP00000300574,9606.ENSP00000312150,9606.ENSP00000331487,9606.ENSP00000341874,9606.ENSP00000349596,9606.ENSP00000354645,9606.ENSP00000355866,9606.ENSP00000358092,9606.ENSP00000365817,9606.ENSP00000370074,9606.ENSP00000376268,9606.ENSP00000413079,9606.ENSP00000480499,…	MICB,TRAFD1,NLRC5,UFD1L,MUL1,PPARG,CRK,TRIB1,NPLOC4,RIOK3,TRIM38,GPATCH3,DUSP10,PRDM1,HLA-E,SERPINB9,SEC14L1,MICA,ITCH,TNFAIP3
GO:0036503	ERAD pathway	20	85	0.42	0.0088	9606.ENSP00000157812,9606.ENSP00000158771,9606.ENSP00000185150,9606.ENSP00000237455,9606.ENSP00000248958,9606.ENSP00000249356,9606.ENSP00000259335,9606.ENSP00000261942,9606.ENSP00000263202,9606.ENSP00000299767,9606.ENSP00000304051,9606.ENSP00000324173,9606.ENSP00000326813,9606.ENSP00000331487,9606.ENSP00000351777,9606.ENSP00000366395,9606.ENSP00000381237,9606.ENSP00000381282,9606.ENSP00000383719,…	PSMC4,DERL2,ERLEC1,RNF103,SDF2L1,DNAJB9,KIAA0368,FAF2,UFD1L,HSP90B1,RNF139,HSPA5,YOD1,NPLOC4,VCP,SYVN1,HM13,VIMP,UBE2J2,HERPUD1
GO:2000058	regulation of ubiquitin-dependent protein catabolic process	30	158	0.32	0.0095	9606.ENSP00000171111,9606.ENSP00000216037,9606.ENSP00000229416,9606.ENSP00000260130,9606.ENSP00000262384,9606.ENSP00000274289,9606.ENSP00000281708,9606.ENSP00000287437,9606.ENSP00000304051,9606.ENSP00000312150,9606.ENSP00000313391,9606.ENSP00000314619,9606.ENSP00000315130,9606.ENSP00000316512,9606.ENSP00000321239,9606.ENSP00000339191,9606.ENSP00000346986,9606.ENSP00000348769,9606.ENSP00000351777,…	KEAP1,XBP1,GCLC,SDCBP,N4BP1,PLK2,FBXW7,NSMCE2,RNF139,TRIB1,DAB2,ZFAND2A,CLU,TLK2,RCHY1,CAV1,WAC,ARIH2,VCP,DDA1,SMURF1,LONRF3,PLK3,RNF19B,TRIM39,TAF9,NFE2L2,LONRF1,HERPUD1,RYBP
GO:2001236	regulation of extrinsic apoptotic signaling pathway	30	158	0.32	0.0095	9606.ENSP00000216117,9606.ENSP00000223095,9606.ENSP00000229416,9606.ENSP00000251849,9606.ENSP00000259808,9606.ENSP00000260356,9606.ENSP00000263339,9606.ENSP00000263640,9606.ENSP00000264832,9606.ENSP00000265371,9606.ENSP00000276431,9606.ENSP00000284637,9606.ENSP00000301838,9606.ENSP00000312455,9606.ENSP00000322457,9606.ENSP00000326119,9606.ENSP00000326737,9606.ENSP00000339191,9606.ENSP00000344352,…	HMOX1,SERPINE1,GCLC,RAF1,RIPK1,THBS1,IL1A,ACVR1,ICAM1,NRP1,TNFRSF10B,SH3RF1,FADD,CFLAR,SIAH2,PMAIP1,TNFRSF12A,CAV1,ATF3,PEA15,MCL1,GCLM,BCL10,EYA3,HSPA1B,RELA,CYLD,SKIL,DEDD2,TNFAIP3
GO:0046685	response to arsenic-containing substance	11	30	0.61	0.0095	9606.ENSP00000216117,9606.ENSP00000225174,9606.ENSP00000229416,9606.ENSP00000314619,9606.ENSP00000344352,9606.ENSP00000359478,9606.ENSP00000362179,9606.ENSP00000363668,9606.ENSP00000384849,9606.ENSP00000443985,9606.ENSP00000480421	HMOX1,PPIF,GCLC,ZFAND2A,ATF3,ABCC2,ZC3H12A,DAXX,CDKN1A,CPEB2,SRRT
GO:0071840	cellular component organization or biogenesis	548	5342	0.06	0.0107	9606.ENSP00000009041,9606.ENSP00000053468,9606.ENSP00000056217,9606.ENSP00000163416,9606.ENSP00000164024,9606.ENSP00000164227,9606.ENSP00000198767,9606.ENSP00000199320,9606.ENSP00000200453,9606.ENSP00000202556,9606.ENSP00000209884,9606.ENSP00000212015,9606.ENSP00000215904,9606.ENSP00000216037,9606.ENSP00000216117,9606.ENSP00000216267,9606.ENSP00000216489,9606.ENSP00000217402,9606.ENSP00000218176,…	STARD3NL,MRPS10,ARHGEF5,GOLGA5,CELSR3,BCL3,RRN3,DIMT1,PPP1R15A,PPP1R13B,KLHL20,SIRT1,PDXP,XBP1,HMOX1,BRD1,ALKBH1,CHMP4B,KCND1,EHD4,GABPB1,VPS18,BRF2,BET1,STX1A,SERPINE1,YKT6,SETX,PPIF,ZPR1,PRDM4,GCLC,BYSL,BNIP1,PCGF1,GORASP2,PRDM2,CAMSAP2,TBPL1,KALRN,EGR2,SNAI1,MPHOSPH10,EREG,PLAGL2,STRIP2,RAF1,NUMBL,SESN2,GRWD1,DNHD1,RRP8,TIMM10B,PER2,H3F3B,KDM6B,IGHMBP2,USPL1,ACTR3B,EIF2S1,ELP3,MBD2,ADAM19,URB2…
GO:0042594	response to starvation	32	175	0.31	0.0109	9606.ENSP00000212015,9606.ENSP00000216037,9606.ENSP00000253063,9606.ENSP00000254605,9606.ENSP00000256383,9606.ENSP00000262039,9606.ENSP00000266458,9606.ENSP00000287820,9606.ENSP00000304004,9606.ENSP00000306682,9606.ENSP00000307235,9606.ENSP00000307260,9606.ENSP00000324173,9606.ENSP00000326119,9606.ENSP00000330032,9606.ENSP00000339191,9606.ENSP00000339881,9606.ENSP00000344352,9606.ENSP00000356125,…	SIRT1,XBP1,SESN2,RRP8,EIF2S1,PIK3C3,GABARAPL1,PPARG,FOXA3,PPM1D,EIF2AK3,TBL2,HSPA5,PMAIP1,UPP1,CAV1,MIOS,ATF3,NUAK2,JUN,RRAGC,ZC3H12A,NFE2L2,MTMR3,CDKN1A,CADPS2,FNIP1,ADM,DDIT3,ZFYVE1,ZFP36,BHLHA15
GO:0031349	positive regulation of defense response	55	365	0.22	0.0114	9606.ENSP00000216797,9606.ENSP00000220751,9606.ENSP00000221452,9606.ENSP00000223095,9606.ENSP00000226574,9606.ENSP00000229332,9606.ENSP00000244869,9606.ENSP00000248244,9606.ENSP00000251849,9606.ENSP00000256458,9606.ENSP00000259808,9606.ENSP00000262039,9606.ENSP00000262510,9606.ENSP00000278568,9606.ENSP00000293328,9606.ENSP00000296677,9606.ENSP00000299767,9606.ENSP00000301838,9606.ENSP00000303231,…	NFKBIA,RIPK2,RELB,SERPINE1,NFKB1,CLEC4A,EREG,TICAM1,RAF1,IRAK2,RIPK1,PIK3C3,NLRC5,PAK1,STAT5B,F2RL1,HSP90B1,FADD,IL12A,ADORA2B,PRKCE,MALT1,KARS,POLR3C,CAV1,RIOK3,PSPC1,SFPQ,ANKRD17,PELI1,CHUK,BCL10,PTAFR,HSPA1B,HLA-E,OPTN,DDX58,TRIM5,RSAD2,ETS1,AP1G1,POLR3D,RELA,TLR6,CYLD,PVR,MUC4,TRAF6,UBC,LDLR,TRAF3,RPS6KA5,ITCH,TNFAIP3,IKBKG
GO:0044403	symbiont process	87	650	0.17	0.0115	9606.ENSP00000212015,9606.ENSP00000216797,9606.ENSP00000217402,9606.ENSP00000220509,9606.ENSP00000227520,9606.ENSP00000232496,9606.ENSP00000234420,9606.ENSP00000248248,9606.ENSP00000252229,9606.ENSP00000259808,9606.ENSP00000263377,9606.ENSP00000264157,9606.ENSP00000264832,9606.ENSP00000265165,9606.ENSP00000267202,9606.ENSP00000268184,9606.ENSP00000269228,9606.ENSP00000273047,9606.ENSP00000273130,…	SIRT1,NFKBIA,CHMP4B,VPS18,CCDC86,TUSC2,MSH6,MON1B,MICB,RIPK1,BRD4,CCNT2,ICAM1,LEF1,VPS37B,CRTC3,NPC1,RAB5A,DYNC1LI1,SLC25A4,FBXW7,GTF2E1,ITGA5,UBAP1,KCTD5,FADD,CFLAR,NUP98,VPS37A,SUPT6H,MMP1,KARS,KPNA7,SMAD3,CAV1,SLC20A2,CREB3,NUP50,TBC1D20,TAP1,UVRAG,EPHA2,ANKRD17,VCP,NUP214,RAET1L,F11R,CRTC2,EIF3A,RBM15,BTRC,JUN,ZC3H12A,DAXX,UBR4,HSPA1B,NMT2,NFX1,DDX58,TRIM5,SERPINB9,GPS2,ITSN1,RSAD2,ATG16L1,TB…
GO:0002758	innate immune response-activating signal transduction	31	168	0.31	0.0115	9606.ENSP00000216797,9606.ENSP00000220751,9606.ENSP00000221452,9606.ENSP00000226574,9606.ENSP00000229332,9606.ENSP00000248244,9606.ENSP00000251849,9606.ENSP00000256458,9606.ENSP00000259808,9606.ENSP00000262039,9606.ENSP00000278568,9606.ENSP00000299767,9606.ENSP00000301838,9606.ENSP00000306124,9606.ENSP00000319279,9606.ENSP00000359424,9606.ENSP00000359612,9606.ENSP00000362965,9606.ENSP00000369213,…	NFKBIA,RIPK2,RELB,NFKB1,CLEC4A,TICAM1,RAF1,IRAK2,RIPK1,PIK3C3,PAK1,HSP90B1,FADD,PRKCE,MALT1,CHUK,BCL10,PTAFR,DDX58,TRIM5,RELA,TLR6,CYLD,MUC4,TRAF6,UBC,TRAF3,RPS6KA5,ITCH,TNFAIP3,IKBKG
GO:0050865	regulation of cell activation	71	506	0.19	0.0117	9606.ENSP00000216037,9606.ENSP00000216085,9606.ENSP00000216117,9606.ENSP00000220751,9606.ENSP00000229416,9606.ENSP00000234420,9606.ENSP00000245414,9606.ENSP00000245817,9606.ENSP00000248244,9606.ENSP00000254066,9606.ENSP00000260356,9606.ENSP00000263056,9606.ENSP00000265643,9606.ENSP00000278568,9606.ENSP00000281092,9606.ENSP00000284273,9606.ENSP00000284637,9606.ENSP00000293328,9606.ENSP00000296677,…	XBP1,RHBDD3,HMOX1,RIPK2,GCLC,MSH6,IRF1,TNFSF9,TICAM1,RARA,THBS1,MAP3K8,GAL,PAK1,FER,UBASH3B,SH3RF1,STAT5B,F2RL1,RUNX1,FADD,IL12A,ADORA2B,CEBPB,CLCF1,PIBF1,EGR3,HSPH1,SUPT6H,MALT1,ZNF335,KARS,NFKBIZ,PDGFB,CAV1,RNF41,PDGFA,NRARP,BTN2A2,PELI1,ZEB1,DUSP10,CTGF,PRDM1,LMO4,BCL10,DLG5,SDC4,ZC3H12A,PTAFR,HLA-E,CD83,TEC,CD274,GPNMB,AP1G1,IL4R,BCL6,CDKN1A,TLR6,CYLD,EXOSC6,MICA,NCK1,FAM49B,TRAF6,RPS6KA1,LDL…
GO:0001701	in utero embryonic development	48	306	0.24	0.0117	9606.ENSP00000157812,9606.ENSP00000171111,9606.ENSP00000198767,9606.ENSP00000216038,9606.ENSP00000216489,9606.ENSP00000227322,9606.ENSP00000230340,9606.ENSP00000237937,9606.ENSP00000244050,9606.ENSP00000249075,9606.ENSP00000257566,9606.ENSP00000262225,9606.ENSP00000262809,9606.ENSP00000263640,9606.ENSP00000264276,9606.ENSP00000265165,9606.ENSP00000265354,9606.ENSP00000280551,9606.ENSP00000283228,…	PSMC4,KEAP1,RRN3,RTCB,ALKBH1,ZPR1,BYSL,ZFAND5,SNAI1,LIF,TBX3,TMED2,ELL,ACVR1,ALS2,LEF1,SRF,SEC24D,PTPRR,FLCN,SENP2,JUNB,CEBPB,FOSL1,HEG1,RBBP6,ZNF335,SOCS3,PDGFB,SMAD3,NDEL1,MAFF,MAFG,ARNT,ELF3,CTR9,PRDM1,NSDHL,GJB3,KDM6A,BMP2,EDN1,JMJD2C,CHD7,CYR61,GNA13,SKIL,ADM
GO:0071216	cellular response to biotic stimulus	32	176	0.3	0.0117	9606.ENSP00000216037,9606.ENSP00000216797,9606.ENSP00000220751,9606.ENSP00000223095,9606.ENSP00000226574,9606.ENSP00000248244,9606.ENSP00000254066,9606.ENSP00000256458,9606.ENSP00000264832,9606.ENSP00000269701,9606.ENSP00000303231,9606.ENSP00000305422,9606.ENSP00000306124,9606.ENSP00000306512,9606.ENSP00000307235,9606.ENSP00000312988,9606.ENSP00000324173,9606.ENSP00000332116,9606.ENSP00000355013,…	XBP1,NFKBIA,RIPK2,SERPINE1,NFKB1,TICAM1,RARA,IRAK2,ICAM1,AKAP8,IL12A,CEBPB,PRKCE,CXCL8,EIF2AK3,NFKBIB,HSPA5,PDE4B,CTR9,PPP1R15B,ABCC2,ANKRD1,ZC3H12A,PTAFR,VIMP,RELA,TLR6,TRAF6,DDIT3,LITAF,ZFP36,TNFAIP3
GO:0006914	autophagy	40	240	0.27	0.0118	9606.ENSP00000179259,9606.ENSP00000216037,9606.ENSP00000217402,9606.ENSP00000220509,9606.ENSP00000231668,9606.ENSP00000237642,9606.ENSP00000254101,9606.ENSP00000262039,9606.ENSP00000262139,9606.ENSP00000266458,9606.ENSP00000267202,9606.ENSP00000269221,9606.ENSP00000269228,9606.ENSP00000277746,9606.ENSP00000287878,9606.ENSP00000296343,9606.ENSP00000305892,9606.ENSP00000314733,9606.ENSP00000315130,…	C12orf5,XBP1,CHMP4B,VPS18,BNIP1,STBD1,PRKAB2,PIK3C3,WIPI1,GABARAPL1,VPS37B,C18orf8,NPC1,NRBF2,PRKAG2,KIAA0226,TMEM208,TOLLIP,CLU,VPS37A,YOD1,RAB12,RNF41,UVRAG,VCP,SMURF1,ATG4A,C6orf106,TP53INP2,TBC1D25,STAM,OPTN,TRIM5,SQSTM1,ATG16L1,MTMR3,PLEKHM1,ZFYVE1,CLTC,C9orf72
GO:0032872	regulation of stress-activated MAPK cascade	36	208	0.28	0.012	9606.ENSP00000013125,9606.ENSP00000056217,9606.ENSP00000215631,9606.ENSP00000220751,9606.ENSP00000259808,9606.ENSP00000260130,9606.ENSP00000262013,9606.ENSP00000262746,9606.ENSP00000264198,9606.ENSP00000278568,9606.ENSP00000284637,9606.ENSP00000287936,9606.ENSP00000294312,9606.ENSP00000296677,9606.ENSP00000310042,9606.ENSP00000314420,9606.ENSP00000316054,9606.ENSP00000318687,9606.ENSP00000325448,…	MAP4K5,ARHGEF5,GADD45B,RIPK2,RIPK1,SDCBP,SPAG9,PRDX1,MUL1,PAK1,SH3RF1,HMGCR,FGF19,F2RL1,ZNF622,PER1,DVL3,HSPH1,KARS,DUSP10,CTGF,GADD45A,PTPN1,ZC3H12A,DKK1,DAXX,BMP2,EDN1,XDH,GPS2,TLR6,MAP2K4,CSB-PGBD3,TRAF6,MAP3K9,ITCH
GO:0051168	nuclear export	30	161	0.32	0.012	9606.ENSP00000242480,9606.ENSP00000254998,9606.ENSP00000265245,9606.ENSP00000272645,9606.ENSP00000291552,9606.ENSP00000297990,9606.ENSP00000298552,9606.ENSP00000298573,9606.ENSP00000302790,9606.ENSP00000316032,9606.ENSP00000319279,9606.ENSP00000320866,9606.ENSP00000322396,9606.ENSP00000339245,9606.ENSP00000345895,9606.ENSP00000352400,9606.ENSP00000354621,9606.ENSP00000354718,9606.ENSP00000356548,…	EGR2,NXT1,LSG1,POLR2D,U2AFBP,NOL6,TSC1,DUSP16,XPO6,NUP98,MALT1,CALR,RRS1,YTHDC1,NUP50,NUP214,SMURF1,AKAP13,LTV1,SRSF3,ZNF593,SRSF2,POM121,RAE1,AGFG1,SMG1,THOC5,ALYREF,NXF1,NUP153
GO:0032434	regulation of proteasomal ubiquitin-dependent protein catabolic process	26	131	0.34	0.0121	9606.ENSP00000171111,9606.ENSP00000216037,9606.ENSP00000229416,9606.ENSP00000260130,9606.ENSP00000262384,9606.ENSP00000274289,9606.ENSP00000287437,9606.ENSP00000312150,9606.ENSP00000313391,9606.ENSP00000314619,9606.ENSP00000315130,9606.ENSP00000316512,9606.ENSP00000321239,9606.ENSP00000339191,9606.ENSP00000346986,9606.ENSP00000348769,9606.ENSP00000351777,9606.ENSP00000352928,9606.ENSP00000360690,…	KEAP1,XBP1,GCLC,SDCBP,N4BP1,PLK2,NSMCE2,TRIB1,DAB2,ZFAND2A,CLU,TLK2,RCHY1,CAV1,WAC,ARIH2,VCP,DDA1,LONRF3,PLK3,RNF19B,TAF9,NFE2L2,LONRF1,HERPUD1,RYBP
GO:0016073	snRNA metabolic process	20	88	0.4	0.0122	9606.ENSP00000216294,9606.ENSP00000237853,9606.ENSP00000262809,9606.ENSP00000264157,9606.ENSP00000272645,9606.ENSP00000283875,9606.ENSP00000296564,9606.ENSP00000308546,9606.ENSP00000310260,9606.ENSP00000361162,9606.ENSP00000370201,9606.ENSP00000375942,9606.ENSP00000379847,9606.ENSP00000398597,9606.ENSP00000403683,9606.ENSP00000415433,9606.ENSP00000431603,9606.ENSP00000434466,9606.ENSP00000476948,…	SNAPC1,ELL2,ELL,CCNT2,POLR2D,GTF2E1,ICE1,MEPCE,INTS6,TOE1,TAF9,TBP,ZNF143,EXOSC6,NABP1,INTS12,POU2F2,INTS4,RPAP2,SRRT
GO:0043535	regulation of blood vessel endothelial cell migration	20	88	0.4	0.0122	9606.ENSP00000212015,9606.ENSP00000216117,9606.ENSP00000249749,9606.ENSP00000260356,9606.ENSP00000265371,9606.ENSP00000274289,9606.ENSP00000287820,9606.ENSP00000309968,9606.ENSP00000330382,9606.ENSP00000338785,9606.ENSP00000345083,9606.ENSP00000351209,9606.ENSP00000353032,9606.ENSP00000357392,9606.ENSP00000357480,9606.ENSP00000363804,9606.ENSP00000368664,9606.ENSP00000371770,9606.ENSP00000376436,…	SIRT1,HMOX1,DLL4,THBS1,NRP1,PLK2,PPARG,ADAM17,PDGFB,STARD13,MAP2K3,EPHA2,P2RX4,EFNA1,NUS1,KLF4,RGCC,FGFBP1,ETS1,NFE2L2
GO:0000188	inactivation of MAPK activity	10	26	0.63	0.0122	9606.ENSP00000239223,9606.ENSP00000288943,9606.ENSP00000298573,9606.ENSP00000339191,9606.ENSP00000355866,9606.ENSP00000358596,9606.ENSP00000370104,9606.ENSP00000380530,9606.ENSP00000418447,9606.ENSP00000477653	DUSP1,DUSP2,DUSP16,CAV1,DUSP10,DUSP5,GPS2,DUSP8,PPP2CA,DUSP14
GO:0045787	positive regulation of cell cycle	56	376	0.22	0.0125	9606.ENSP00000209728,9606.ENSP00000228872,9606.ENSP00000244869,9606.ENSP00000254066,9606.ENSP00000254605,9606.ENSP00000257566,9606.ENSP00000260187,9606.ENSP00000261254,9606.ENSP00000263339,9606.ENSP00000263377,9606.ENSP00000263620,9606.ENSP00000264157,9606.ENSP00000265165,9606.ENSP00000273130,9606.ENSP00000274289,9606.ENSP00000287437,9606.ENSP00000290551,9606.ENSP00000293328,9606.ENSP00000295400,…	CDC6,CDKN1B,EREG,RARA,RRP8,TBX3,USP2,CCND2,IL1A,BRD4,ARID3A,CCNT2,LEF1,DYNC1LI1,PLK2,NSMCE2,BTG2,STAT5B,TGFA,CCNL1,AURKC,CDC25A,PRKCE,MEPCE,ADAM17,FOSL1,CRLF3,CALR,PDGFB,SPDYA,OVOL1,SFN,DYNC1H1,PIWIL2,RASSF1,SFPQ,ANKRD17,PLAGL1,INO80,PROX1,CTGF,GADD45A,PLK3,PIM1,ZBTB17,RGCC,EDN1,NKX3-1,DMRT1,UBE2E2,RDX,CDKN1A,THOC5,CITED2,CNOT4,NR4A3
GO:0071347	cellular response to interleukin-1	25	124	0.35	0.0125	9606.ENSP00000216797,9606.ENSP00000220751,9606.ENSP00000226574,9606.ENSP00000239938,9606.ENSP00000256458,9606.ENSP00000263056,9606.ENSP00000263339,9606.ENSP00000264832,9606.ENSP00000305422,9606.ENSP00000306512,9606.ENSP00000314733,9606.ENSP00000351789,9606.ENSP00000359206,9606.ENSP00000359424,9606.ENSP00000359478,9606.ENSP00000360762,9606.ENSP00000362179,9606.ENSP00000368683,9606.ENSP00000370253,…	NFKBIA,RIPK2,NFKB1,EGR1,IRAK2,MAP3K8,IL1A,ICAM1,CEBPB,CXCL8,TOLLIP,PELI1,BTRC,CHUK,ABCC2,ANKRD1,ZC3H12A,EDN1,NKX3-1,SQSTM1,RELA,TRAF6,UBC,RPS6KA5,IKBKG
GO:0031667	response to nutrient levels	65	455	0.2	0.0126	9606.ENSP00000212015,9606.ENSP00000215904,9606.ENSP00000216037,9606.ENSP00000216117,9606.ENSP00000228606,9606.ENSP00000229416,9606.ENSP00000252809,9606.ENSP00000253063,9606.ENSP00000254066,9606.ENSP00000254605,9606.ENSP00000256383,9606.ENSP00000256429,9606.ENSP00000261292,9606.ENSP00000262039,9606.ENSP00000264832,9606.ENSP00000265354,9606.ENSP00000266458,9606.ENSP00000275300,9606.ENSP00000276925,…	SIRT1,PDXP,XBP1,HMOX1,CYP27B1,GCLC,GDF15,SESN2,RARA,RRP8,EIF2S1,MBD2,LIPG,PIK3C3,ICAM1,SRF,GABARAPL1,SLC22A3,CDKN2B,PPARG,HMGCR,AQP3,TSC1,HSP90B1,FOXA3,PPM1D,EIF2AK3,TBL2,SSH1,HMGCS1,HSPA5,PMAIP1,UPP1,ZNF354A,CAV1,MIOS,ATF3,ADIPOR2,P2RX4,PROX1,NUAK2,ADRB1,GCLM,BCL10,JUN,RRAGC,SLC25A25,ZC3H12A,PIM1,SRSF2,NFE2L2,RELA,MTMR3,CDKN1A,FOXO3,CREB1,ATP2B1,CADPS2,FNIP1,ADM,DDIT3,ZFYVE1,LDLR,ZFP36,BHLHA15
GO:0045732	positive regulation of protein catabolic process	37	217	0.28	0.0126	9606.ENSP00000157812,9606.ENSP00000171111,9606.ENSP00000216037,9606.ENSP00000216085,9606.ENSP00000228872,9606.ENSP00000229416,9606.ENSP00000274289,9606.ENSP00000281708,9606.ENSP00000287437,9606.ENSP00000294179,9606.ENSP00000304051,9606.ENSP00000312150,9606.ENSP00000313391,9606.ENSP00000314619,9606.ENSP00000315130,9606.ENSP00000321239,9606.ENSP00000339191,9606.ENSP00000342755,9606.ENSP00000346890,…	PSMC4,KEAP1,XBP1,RHBDD3,CDKN1B,GCLC,PLK2,FBXW7,NSMCE2,STX5,RNF139,TRIB1,DAB2,ZFAND2A,CLU,RCHY1,CAV1,RNF41,NRD1,ARIH2,MYLIP,VCP,SMURF1,LONRF3,PLK3,RNF19B,NFE2L2,LONRF1,NEDD4L,RDX,HERPUD1,TIPARP,LDLR,EGLN2,OAZ1,ITCH,TNFAIP3
GO:0071456	cellular response to hypoxia	27	139	0.33	0.0126	9606.ENSP00000179259,9606.ENSP00000212015,9606.ENSP00000216117,9606.ENSP00000239938,9606.ENSP00000250457,9606.ENSP00000263980,9606.ENSP00000264832,9606.ENSP00000297991,9606.ENSP00000306124,9606.ENSP00000306864,9606.ENSP00000307260,9606.ENSP00000312455,9606.ENSP00000326119,9606.ENSP00000327801,9606.ENSP00000351407,9606.ENSP00000360762,9606.ENSP00000361275,9606.ENSP00000368664,9606.ENSP00000368683,…	C12orf5,SIRT1,HMOX1,EGR1,EGLN3,SLC9A1,ICAM1,AQP3,PRKCE,VASN,TBL2,CFLAR,PMAIP1,P4HB,ARNT,ANKRD1,PLK3,RGCC,EDN1,NKX3-1,NFE2L2,BACH1,FOXO3,UBC,CPEB2,CITED2,EGLN2
GO:0007346	regulation of mitotic cell cycle	82	608	0.18	0.0127	9606.ENSP00000013125,9606.ENSP00000209728,9606.ENSP00000212015,9606.ENSP00000215904,9606.ENSP00000217402,9606.ENSP00000228872,9606.ENSP00000239223,9606.ENSP00000244869,9606.ENSP00000252992,9606.ENSP00000254250,9606.ENSP00000258774,9606.ENSP00000260130,9606.ENSP00000260187,9606.ENSP00000260372,9606.ENSP00000261254,9606.ENSP00000263056,9606.ENSP00000263339,9606.ENSP00000263377,9606.ENSP00000263620,…	MAP4K5,CDC6,SIRT1,PDXP,CHMP4B,CDKN1B,DUSP1,EREG,CEP85,THAP1,HUS1,SDCBP,USP2,HAUS2,CCND2,MAP3K8,IL1A,BRD4,ARID3A,MAP4K3,SIK1,DYNC1LI1,PLK2,CDKN2B,PAK1,ORAOV1,RIOK2,NSMCE2,BTG2,STAT5B,TGFA,SENP2,TUBA1A,YWHAG,MEPCE,ADAM17,PINX1,PRMT5,DCUN1D3,PDGFB,SMAD3,OVOL1,SFN,MCPH1,OFD1,BTG3,MAP2K3,DYNC1H1,ANKRD17,PLAGL1,PIM3,CDC14A,INO80,SLK,GADD45A,PLK3,PIM1,KLF4,HSPA1B,PIM2,RGCC,EDN1,HAUS6,NKX3-1,GPNMB,DMRT1,…
GO:0048511	rhythmic process	41	250	0.26	0.0128	9606.ENSP00000212015,9606.ENSP00000215917,9606.ENSP00000221452,9606.ENSP00000222553,9606.ENSP00000223095,9606.ENSP00000224140,9606.ENSP00000239938,9606.ENSP00000242480,9606.ENSP00000242728,9606.ENSP00000244869,9606.ENSP00000252818,9606.ENSP00000254657,9606.ENSP00000256495,9606.ENSP00000260187,9606.ENSP00000265372,9606.ENSP00000266304,9606.ENSP00000266503,9606.ENSP00000270162,9606.ENSP00000280614,…	SIRT1,SRRD,RELB,NAMPT,SERPINE1,SETX,EGR1,EGR2,BHLHE41,EREG,JUND,PER2,BHLHE40,USP2,CREM,TEF,ARNTL2,SIK1,CCRN4L,PPARG,STAT5B,NFIL3,NR1D2,PER1,EGR3,PRMT5,PSPC1,NFYA,SFPQ,PROX1,KDM5B,NFKB2,BTRC,JUN,ETS1,KDM5A,ARNTL,FOXO3,CREB1,CLDN4,CRY2
GO:0070555	response to interleukin-1	28	147	0.33	0.0128	9606.ENSP00000216797,9606.ENSP00000220751,9606.ENSP00000226574,9606.ENSP00000229416,9606.ENSP00000239938,9606.ENSP00000256458,9606.ENSP00000263056,9606.ENSP00000263339,9606.ENSP00000264832,9606.ENSP00000305422,9606.ENSP00000306512,9606.ENSP00000314733,9606.ENSP00000351789,9606.ENSP00000359206,9606.ENSP00000359424,9606.ENSP00000359478,9606.ENSP00000360762,9606.ENSP00000362179,9606.ENSP00000368683,…	NFKBIA,RIPK2,NFKB1,GCLC,EGR1,IRAK2,MAP3K8,IL1A,ICAM1,CEBPB,CXCL8,TOLLIP,PELI1,BTRC,CHUK,ABCC2,ANKRD1,ZC3H12A,EDN1,TAF9,NKX3-1,SQSTM1,ETS1,RELA,TRAF6,UBC,RPS6KA5,IKBKG
GO:0048194	Golgi vesicle budding	18	75	0.43	0.0128	9606.ENSP00000222547,9606.ENSP00000260643,9606.ENSP00000262225,9606.ENSP00000265070,9606.ENSP00000280551,9606.ENSP00000291574,9606.ENSP00000294179,9606.ENSP00000295400,9606.ENSP00000325827,9606.ENSP00000330945,9606.ENSP00000338844,9606.ENSP00000346139,9606.ENSP00000358071,9606.ENSP00000362339,9606.ENSP00000378721,9606.ENSP00000381823,9606.ENSP00000390783,9606.ENSP00000444850	BET1,PREB,TMED2,GOLPH3,SEC24D,TRAPPC10,STX5,TGFA,SEC16A,TMED9,SEC23B,TBC1D20,SEC23IP,SAR1A,SEC31A,SEC24A,SCFD1,USO1
GO:2000232	regulation of rRNA processing	7	12	0.81	0.0128	9606.ENSP00000199320,9606.ENSP00000283109,9606.ENSP00000296792,9606.ENSP00000314193,9606.ENSP00000369162,9606.ENSP00000384302,9606.ENSP00000441214	DIMT1,RIOK2,UTP15,WDR75,RIOK1,WDR43,USP36
GO:0002218	activation of innate immune response	33	186	0.29	0.0131	9606.ENSP00000216797,9606.ENSP00000220751,9606.ENSP00000221452,9606.ENSP00000226574,9606.ENSP00000229332,9606.ENSP00000248244,9606.ENSP00000251849,9606.ENSP00000256458,9606.ENSP00000259808,9606.ENSP00000262039,9606.ENSP00000278568,9606.ENSP00000299767,9606.ENSP00000301838,9606.ENSP00000306124,9606.ENSP00000319279,9606.ENSP00000343966,9606.ENSP00000349748,9606.ENSP00000359424,9606.ENSP00000359612,…	NFKBIA,RIPK2,RELB,NFKB1,CLEC4A,TICAM1,RAF1,IRAK2,RIPK1,PIK3C3,PAK1,HSP90B1,FADD,PRKCE,MALT1,PSPC1,SFPQ,CHUK,BCL10,PTAFR,DDX58,TRIM5,RELA,TLR6,CYLD,MUC4,TRAF6,UBC,TRAF3,RPS6KA5,ITCH,TNFAIP3,IKBKG
GO:0019221	cytokine-mediated signaling pathway	87	655	0.17	0.0132	9606.ENSP00000064780,9606.ENSP00000212015,9606.ENSP00000216117,9606.ENSP00000216797,9606.ENSP00000220751,9606.ENSP00000222812,9606.ENSP00000226574,9606.ENSP00000227752,9606.ENSP00000239938,9606.ENSP00000244869,9606.ENSP00000245414,9606.ENSP00000245817,9606.ENSP00000249075,9606.ENSP00000252891,9606.ENSP00000256458,9606.ENSP00000257570,9606.ENSP00000259808,9606.ENSP00000263056,9606.ENSP00000263339,…	RELT,SIRT1,HMOX1,NFKBIA,RIPK2,STX1A,NFKB1,IL10RA,EGR1,EREG,IRF1,TNFSF9,LIF,NUMBL,IRAK2,OASL,RIPK1,MAP3K8,IL1A,BIRC3,IL11,ICAM1,TNFRSF10B,FER,IFNGR2,STAT5B,CXCL3,CXCL5,HSP90B1,CRK,IL12A,JUNB,LRP8,FOS,CXCL8,ISG20,CLCF1,ADAM17,TNFRSF10D,TOLLIP,MMP1,KARS,TNFRSF12A,CSF1,P4HB,IFNLR1,SOCS3,PDGFB,MX2,STX3,TRIM38,ADIPOR2,CCRL2,PELI1,ZEB1,CTR9,IRF6,IL6R,MCL1,RBM15,BTRC,CHUK,PIM1,PTAFR,HLA-E,FLRT3,TRIM5,TEC…
GO:0044248	cellular catabolic process	190	1646	0.11	0.0133	9606.ENSP00000157812,9606.ENSP00000158771,9606.ENSP00000171111,9606.ENSP00000179259,9606.ENSP00000185150,9606.ENSP00000209884,9606.ENSP00000212015,9606.ENSP00000215904,9606.ENSP00000216037,9606.ENSP00000216117,9606.ENSP00000217402,9606.ENSP00000218516,9606.ENSP00000219313,9606.ENSP00000220509,9606.ENSP00000222982,9606.ENSP00000227322,9606.ENSP00000228606,9606.ENSP00000231668,9606.ENSP00000237455,…	PSMC4,DERL2,KEAP1,C12orf5,ERLEC1,KLHL20,SIRT1,PDXP,XBP1,HMOX1,CHMP4B,GLA,PSMD7,VPS18,CYP3A5,ZPR1,CYP27B1,BNIP1,RNF103,STBD1,RNF11,FBXL12,SDF2L1,DNAJB9,CDADC1,TRPC4AP,SESN2,PRKAB2,RNF122,KIAA0368,RIPK1,USP2,LIPG,PSMD11,FAF2,PIK3C3,WIPI1,PRDX1,UFD1L,MECR,SLC9A1,PSMD3,MTRR,GABARAPL1,VPS37B,C18orf8,NPC1,POLR2D,PELO,NRBF2,CCRN4L,BTBD11,QDPR,FBXW7,USP12,PRKAG2,CBR3,TMEM199,CHAC2,KIAA0226,UBAP1,HSP90B1,…
GO:0002753	cytoplasmic pattern recognition receptor signaling pathway	11	32	0.58	0.0134	9606.ENSP00000216797,9606.ENSP00000220751,9606.ENSP00000256458,9606.ENSP00000369213,9606.ENSP00000384273,9606.ENSP00000392025,9606.ENSP00000433623,9606.ENSP00000441543,9606.ENSP00000480499,9606.ENSP00000481570,9606.ENSP00000483825	NFKBIA,RIPK2,IRAK2,DDX58,RELA,CYLD,TRAF6,UBC,ITCH,TNFAIP3,IKBKG
GO:1902235	regulation of endoplasmic reticulum stress-induced intrinsic apoptotic signaling pathway	11	32	0.58	0.0134	9606.ENSP00000212015,9606.ENSP00000216037,9606.ENSP00000307235,9606.ENSP00000326119,9606.ENSP00000342136,9606.ENSP00000360683,9606.ENSP00000366395,9606.ENSP00000381282,9606.ENSP00000409555,9606.ENSP00000417273,9606.ENSP00000448665	SIRT1,XBP1,EIF2AK3,PMAIP1,CREB3,PTPN1,SYVN1,VIMP,HERPUD1,NCK1,DDIT3
GO:0016050	vesicle organization	49	318	0.23	0.0135	9606.ENSP00000217402,9606.ENSP00000220509,9606.ENSP00000222547,9606.ENSP00000222812,9606.ENSP00000223369,9606.ENSP00000237264,9606.ENSP00000260643,9606.ENSP00000262039,9606.ENSP00000262225,9606.ENSP00000264276,9606.ENSP00000265070,9606.ENSP00000265909,9606.ENSP00000267202,9606.ENSP00000280551,9606.ENSP00000291574,9606.ENSP00000294179,9606.ENSP00000295400,9606.ENSP00000318629,9606.ENSP00000320866,…	CHMP4B,VPS18,BET1,STX1A,YKT6,TBPL1,PREB,PIK3C3,TMED2,ALS2,GOLPH3,SNX19,VPS37B,SEC24D,TRAPPC10,STX5,TGFA,VPS37A,CALR,SEC16A,TMED9,STX3,SEC23B,CAV1,TBC1D20,TAP1,UVRAG,EXOC8,RAB32,SEC23IP,PI4K2A,STX16,SAR1A,STAM,LYST,SQSTM1,SNX11,AP1G1,SEC31A,USP8,TMF1,SEC24A,MYO7A,AGFG1,CREB1,AP1M1,SCFD1,BLOC1S3,USO1
GO:2000116	regulation of cysteine-type endopeptidase activity	40	243	0.26	0.0136	9606.ENSP00000212015,9606.ENSP00000220751,9606.ENSP00000250457,9606.ENSP00000251849,9606.ENSP00000259808,9606.ENSP00000260356,9606.ENSP00000260442,9606.ENSP00000263464,9606.ENSP00000264198,9606.ENSP00000265165,9606.ENSP00000276431,9606.ENSP00000284637,9606.ENSP00000287820,9606.ENSP00000301838,9606.ENSP00000307235,9606.ENSP00000310263,9606.ENSP00000312455,9606.ENSP00000322457,9606.ENSP00000326119,…	SIRT1,RIPK2,EGLN3,RAF1,RIPK1,THBS1,BCL2L10,BIRC3,MUL1,LEF1,TNFRSF10B,SH3RF1,PPARG,FADD,EIF2AK3,TNFRSF10D,CFLAR,SIAH2,PMAIP1,SMAD3,PLAUR,SFN,VCP,CTGF,BCL10,MTCH1,BAK1,KLF4,XDH,SERPINB9,NKX3-1,SLC11A2,DIABLO,CYR61,HERPUD1,FNIP1,CRYAB,RPS6KA1,BIRC2,BCL2L13
GO:0045926	negative regulation of growth	39	235	0.27	0.0137	9606.ENSP00000212015,9606.ENSP00000228606,9606.ENSP00000228872,9606.ENSP00000235382,9606.ENSP00000252809,9606.ENSP00000253063,9606.ENSP00000256015,9606.ENSP00000264198,9606.ENSP00000265342,9606.ENSP00000265371,9606.ENSP00000265643,9606.ENSP00000273668,9606.ENSP00000278568,9606.ENSP00000285071,9606.ENSP00000287820,9606.ENSP00000318804,9606.ENSP00000319482,9606.ENSP00000325414,9606.ENSP00000332973,…	SIRT1,CYP27B1,CDKN1B,RGS2,GDF15,SESN2,BTG1,MUL1,FSTL4,NRP1,GAL,EAF2,PAK1,FLCN,PPARG,CRLF3,DCUN1D3,SERTAD3,SMAD3,JARID2,ADIPOR2,MAP2,ENPP1,OSGIN1,DUSP10,ADRB1,TSPYL2,HSPA1B,ING1,SQSTM1,WWC2,BCL6,CDKN1A,SH3BP4,OSGIN2,PNPT1,PPP2CA,CDKN2AIP,CRYAB
GO:0036294	cellular response to decreased oxygen levels	28	148	0.32	0.0137	9606.ENSP00000179259,9606.ENSP00000212015,9606.ENSP00000216117,9606.ENSP00000239938,9606.ENSP00000250457,9606.ENSP00000263980,9606.ENSP00000264832,9606.ENSP00000297991,9606.ENSP00000298552,9606.ENSP00000306124,9606.ENSP00000306864,9606.ENSP00000307260,9606.ENSP00000312455,9606.ENSP00000326119,9606.ENSP00000327801,9606.ENSP00000351407,9606.ENSP00000360762,9606.ENSP00000361275,9606.ENSP00000368664,…	C12orf5,SIRT1,HMOX1,EGR1,EGLN3,SLC9A1,ICAM1,AQP3,TSC1,PRKCE,VASN,TBL2,CFLAR,PMAIP1,P4HB,ARNT,ANKRD1,PLK3,RGCC,EDN1,NKX3-1,NFE2L2,BACH1,FOXO3,UBC,CPEB2,CITED2,EGLN2
GO:1904031	positive regulation of cyclin-dependent protein kinase activity	12	38	0.54	0.014	9606.ENSP00000209728,9606.ENSP00000228872,9606.ENSP00000261254,9606.ENSP00000264157,9606.ENSP00000295926,9606.ENSP00000309968,9606.ENSP00000330382,9606.ENSP00000335628,9606.ENSP00000355925,9606.ENSP00000362608,9606.ENSP00000368664,9606.ENSP00000384849	CDC6,CDKN1B,CCND2,CCNT2,CCNL1,ADAM17,PDGFB,SPDYA,PROX1,PIM1,RGCC,CDKN1A
GO:0043410	positive regulation of MAPK cascade	71	512	0.19	0.0142	9606.ENSP00000013125,9606.ENSP00000056217,9606.ENSP00000215631,9606.ENSP00000220751,9606.ENSP00000249075,9606.ENSP00000251849,9606.ENSP00000252809,9606.ENSP00000256458,9606.ENSP00000259808,9606.ENSP00000260130,9606.ENSP00000260356,9606.ENSP00000261918,9606.ENSP00000262013,9606.ENSP00000262947,9606.ENSP00000263056,9606.ENSP00000263881,9606.ENSP00000264198,9606.ENSP00000264431,9606.ENSP00000264563,…	MAP4K5,ARHGEF5,GADD45B,RIPK2,LIF,RAF1,GDF15,IRAK2,RIPK1,SDCBP,THBS1,SEMA7A,SPAG9,C19orf10,MAP3K8,MAP4K3,MUL1,RAPGEF2,IL11,DNAJC27,ICAM1,MAP3K13,NRP1,GAREM,PAK1,FBXW7,SH3RF1,HMGCR,BRAF,FGF19,TGFA,F2RL1,CRK,ADORA2B,PRKCE,ZNF622,CFLAR,DVL3,KARS,PDGFB,MAP2K3,PDGFA,AKAP13,CTGF,PEA15,EFNA1,IL6R,DUSP5,AVPI1,GADD45A,JUN,PTPN1,ZC3H12A,DKK1,DAXX,SPRY2,BMP2,EDN1,XDH,GCNT2,TRIM5,IGFBP3,GPNMB,TLR6,MAP2K4,CSB-…
GO:0046330	positive regulation of JNK cascade	25	126	0.34	0.0142	9606.ENSP00000013125,9606.ENSP00000056217,9606.ENSP00000215631,9606.ENSP00000220751,9606.ENSP00000259808,9606.ENSP00000260130,9606.ENSP00000262013,9606.ENSP00000264198,9606.ENSP00000278568,9606.ENSP00000284637,9606.ENSP00000294312,9606.ENSP00000296677,9606.ENSP00000310042,9606.ENSP00000316054,9606.ENSP00000356954,9606.ENSP00000360025,9606.ENSP00000360683,9606.ENSP00000363081,9606.ENSP00000363668,…	MAP4K5,ARHGEF5,GADD45B,RIPK2,RIPK1,SDCBP,SPAG9,MUL1,PAK1,SH3RF1,FGF19,F2RL1,ZNF622,DVL3,CTGF,GADD45A,PTPN1,DKK1,DAXX,EDN1,TLR6,MAP2K4,CSB-PGBD3,TRAF6,MAP3K9
GO:0048660	regulation of smooth muscle cell proliferation	25	126	0.34	0.0142	9606.ENSP00000216037,9606.ENSP00000216117,9606.ENSP00000222553,9606.ENSP00000228872,9606.ENSP00000230990,9606.ENSP00000244869,9606.ENSP00000260356,9606.ENSP00000265074,9606.ENSP00000271555,9606.ENSP00000278568,9606.ENSP00000287820,9606.ENSP00000287936,9606.ENSP00000303231,9606.ENSP00000312150,9606.ENSP00000330382,9606.ENSP00000357470,9606.ENSP00000360266,9606.ENSP00000362965,9606.ENSP00000363804,…	XBP1,HMOX1,NAMPT,CDKN1B,HBEGF,EREG,THBS1,NPR3,MEF2D,PAK1,PPARG,HMGCR,IL12A,TRIB1,PDGFB,IL6R,JUN,PTAFR,KLF4,EDN1,IGFBP3,CDKN1A,TRAF6,TNFAIP3,NR4A3
GO:2000060	positive regulation of ubiquitin-dependent protein catabolic process	22	104	0.37	0.0142	9606.ENSP00000171111,9606.ENSP00000216037,9606.ENSP00000229416,9606.ENSP00000274289,9606.ENSP00000281708,9606.ENSP00000287437,9606.ENSP00000304051,9606.ENSP00000312150,9606.ENSP00000313391,9606.ENSP00000314619,9606.ENSP00000315130,9606.ENSP00000321239,9606.ENSP00000339191,9606.ENSP00000348769,9606.ENSP00000351777,9606.ENSP00000354621,9606.ENSP00000360690,9606.ENSP00000361275,9606.ENSP00000362555,…	KEAP1,XBP1,GCLC,PLK2,FBXW7,NSMCE2,RNF139,TRIB1,DAB2,ZFAND2A,CLU,RCHY1,CAV1,ARIH2,VCP,SMURF1,LONRF3,PLK3,RNF19B,NFE2L2,LONRF1,HERPUD1
GO:2001237	negative regulation of extrinsic apoptotic signaling pathway	22	104	0.37	0.0142	9606.ENSP00000216117,9606.ENSP00000223095,9606.ENSP00000229416,9606.ENSP00000251849,9606.ENSP00000259808,9606.ENSP00000260356,9606.ENSP00000263339,9606.ENSP00000263640,9606.ENSP00000264832,9606.ENSP00000265371,9606.ENSP00000276431,9606.ENSP00000284637,9606.ENSP00000301838,9606.ENSP00000312455,9606.ENSP00000322457,9606.ENSP00000357055,9606.ENSP00000358022,9606.ENSP00000359258,9606.ENSP00000362978,…	HMOX1,SERPINE1,GCLC,RAF1,RIPK1,THBS1,IL1A,ACVR1,ICAM1,NRP1,TNFRSF10B,SH3RF1,FADD,CFLAR,SIAH2,PEA15,MCL1,GCLM,EYA3,HSPA1B,RELA,TNFAIP3
GO:0070423	nucleotide-binding oligomerization domain containing signaling pathway	10	27	0.61	0.0142	9606.ENSP00000216797,9606.ENSP00000220751,9606.ENSP00000256458,9606.ENSP00000384273,9606.ENSP00000392025,9606.ENSP00000433623,9606.ENSP00000441543,9606.ENSP00000480499,9606.ENSP00000481570,9606.ENSP00000483825	NFKBIA,RIPK2,IRAK2,RELA,CYLD,TRAF6,UBC,ITCH,TNFAIP3,IKBKG
GO:0051094	positive regulation of developmental process	153	1286	0.12	0.0144	9606.ENSP00000198767,9606.ENSP00000212015,9606.ENSP00000216037,9606.ENSP00000216117,9606.ENSP00000220751,9606.ENSP00000223095,9606.ENSP00000224140,9606.ENSP00000226574,9606.ENSP00000228606,9606.ENSP00000234198,9606.ENSP00000234420,9606.ENSP00000235382,9606.ENSP00000239938,9606.ENSP00000240874,9606.ENSP00000244050,9606.ENSP00000245817,9606.ENSP00000249075,9606.ENSP00000252809,9606.ENSP00000252818,…	RRN3,SIRT1,XBP1,HMOX1,RIPK2,SERPINE1,SETX,NFKB1,CYP27B1,DLX2,MSH6,RGS2,EGR1,KALRN,SNAI1,TNFSF9,LIF,GDF15,JUND,NUMBL,RARA,JAG1,BTG1,RIPK1,SDCBP,THBS1,LHX5,MAPK6,SEMA7A,SPAG9,ACIN1,C19orf10,IL1A,ACVR1,MUL1,RAPGEF2,LEF1,SRF,NRP1,GAL,KRT10,RHOB,PLK2,PAK1,CCRN4L,NIPBL,CA2,PPARG,HMGCR,STAT5B,ITGA5,RUNX1,CRK,FADD,IL12A,JUNB,LRP8,CEBPB,FOS,CXCL8,ETV5,CLCF1,TRIB1,CFLAR,DAB2,METRNL,DVL3,ZNF609,PLD6,EGR3,PR…
GO:0010506	regulation of autophagy	45	286	0.24	0.0146	9606.ENSP00000179259,9606.ENSP00000212015,9606.ENSP00000216037,9606.ENSP00000216117,9606.ENSP00000217402,9606.ENSP00000220751,9606.ENSP00000221086,9606.ENSP00000248244,9606.ENSP00000253063,9606.ENSP00000264198,9606.ENSP00000264380,9606.ENSP00000269221,9606.ENSP00000269228,9606.ENSP00000273047,9606.ENSP00000274289,9606.ENSP00000281708,9606.ENSP00000285071,9606.ENSP00000296343,9606.ENSP00000298552,…	C12orf5,SIRT1,XBP1,HMOX1,CHMP4B,RIPK2,MTMR9,TICAM1,SESN2,MUL1,PIKFYVE,C18orf8,NPC1,RAB5A,PLK2,FBXW7,FLCN,KIAA0226,TSC1,TLK2,RAB12,RNF41,WAC,UVRAG,MTCL1,SMURF1,EXOC8,MCL1,PLK3,RRAGC,ZC3H12A,TP53INP2,PIM2,PIP4K2A,TBC1D25,OPTN,MTMR3,SH3BP4,HERC1,SCFD1,ABL2,ATP6V0B,USP36,C9orf72,IKBKG
GO:0007050	cell cycle arrest	28	149	0.32	0.0146	9606.ENSP00000200453,9606.ENSP00000216420,9606.ENSP00000228872,9606.ENSP00000239223,9606.ENSP00000245414,9606.ENSP00000254101,9606.ENSP00000258770,9606.ENSP00000260356,9606.ENSP00000276925,9606.ENSP00000286760,9606.ENSP00000287878,9606.ENSP00000303231,9606.ENSP00000306512,9606.ENSP00000332973,9606.ENSP00000338807,9606.ENSP00000342924,9606.ENSP00000349547,9606.ENSP00000353734,9606.ENSP00000354916,…	PPP1R15A,CGRRF1,CDKN1B,DUSP1,IRF1,PRKAB2,TBRG4,THBS1,CDKN2B,WHAMM,PRKAG2,IL12A,CXCL8,SMAD3,ZBTB49,MCPH1,RASSF1,PLAGL1,CDC14A,IRF6,GADD45A,RRAGC,RGCC,NKX3-1,CDKN1A,PNPT1,SKIL,DDIT3
GO:0097190	apoptotic signaling pathway	46	295	0.24	0.015	9606.ENSP00000064780,9606.ENSP00000164227,9606.ENSP00000200453,9606.ENSP00000202556,9606.ENSP00000212015,9606.ENSP00000216037,9606.ENSP00000216117,9606.ENSP00000234420,9606.ENSP00000248244,9606.ENSP00000251849,9606.ENSP00000254605,9606.ENSP00000259808,9606.ENSP00000260442,9606.ENSP00000263339,9606.ENSP00000276431,9606.ENSP00000301838,9606.ENSP00000303231,9606.ENSP00000305422,9606.ENSP00000307305,…	RELT,BCL3,PPP1R15A,PPP1R13B,SIRT1,XBP1,HMOX1,MSH6,TICAM1,RAF1,RRP8,RIPK1,BCL2L10,IL1A,TNFRSF10B,FADD,IL12A,CEBPB,DDIT4,ZNF622,TNFRSF10D,CLU,PMAIP1,TNFRSF12A,AEN,SMAD3,CAV1,SFN,RNF41,EPHA2,P2RX4,TOPORS,IL6R,MCL1,BAG3,JUN,BAK1,DAXX,CDKN1A,FOXO3,CHAC1,DIABLO,CSB-PGBD3,DDIT3,DEDD2,TNFRSF9
GO:0001818	negative regulation of cytokine production	40	245	0.26	0.015	9606.ENSP00000164227,9606.ENSP00000216117,9606.ENSP00000221452,9606.ENSP00000226574,9606.ENSP00000229332,9606.ENSP00000232496,9606.ENSP00000254066,9606.ENSP00000260356,9606.ENSP00000262510,9606.ENSP00000263202,9606.ENSP00000264198,9606.ENSP00000264607,9606.ENSP00000265165,9606.ENSP00000269701,9606.ENSP00000295025,9606.ENSP00000296677,9606.ENSP00000303231,9606.ENSP00000317144,9606.ENSP00000331487,…	BCL3,HMOX1,RELB,NFKB1,CLEC4A,TUSC2,RARA,THBS1,NLRC5,UFD1L,MUL1,ASB1,LEF1,AKAP8,REL,F2RL1,IL12A,PIBF1,NPLOC4,BTN2A2,GPATCH3,IL6R,ZC3H12A,KLF4,ERRFI1,CD83,RGCC,DDX58,CD274,GPNMB,VIMP,BCL6,TLR6,CYLD,OTUD7B,ZFP36,TNFRSF9,RPS6KA5,ITCH,TNFAIP3
GO:0032479	regulation of type I interferon production	23	112	0.36	0.015	9606.ENSP00000220751,9606.ENSP00000221452,9606.ENSP00000226574,9606.ENSP00000245414,9606.ENSP00000248244,9606.ENSP00000262510,9606.ENSP00000263202,9606.ENSP00000295025,9606.ENSP00000331487,9606.ENSP00000334564,9606.ENSP00000341874,9606.ENSP00000349596,9606.ENSP00000354645,9606.ENSP00000358983,9606.ENSP00000359424,9606.ENSP00000361446,9606.ENSP00000369213,9606.ENSP00000380904,9606.ENSP00000384273,…	RIPK2,RELB,NFKB1,IRF1,TICAM1,NLRC5,UFD1L,REL,NPLOC4,POLR3C,RIOK3,TRIM38,GPATCH3,NFKB2,CHUK,POLR3A,DDX58,POLR3D,RELA,CYLD,TRAF3,ITCH,TNFAIP3
GO:0051092	positive regulation of NF-kappaB transcription factor activity	27	142	0.32	0.0153	9606.ENSP00000220751,9606.ENSP00000226574,9606.ENSP00000248244,9606.ENSP00000256458,9606.ENSP00000259808,9606.ENSP00000262294,9606.ENSP00000264832,9606.ENSP00000265026,9606.ENSP00000281092,9606.ENSP00000295704,9606.ENSP00000300086,9606.ENSP00000312455,9606.ENSP00000315130,9606.ENSP00000319279,9606.ENSP00000332454,9606.ENSP00000349596,9606.ENSP00000358983,9606.ENSP00000359424,9606.ENSP00000359612,…	RIPK2,NFKB1,TICAM1,IRAK2,RIPK1,TRIM37,ICAM1,MAP3K13,FER,RNF25,TERF2IP,CFLAR,CLU,MALT1,RIPK4,TRIM38,NFKB2,CHUK,BCL10,HSPA1B,TRIM5,RELA,TLR6,TRAF6,UBC,RPS6KA5,IKBKG
GO:1901700	response to oxygen-containing compound	167	1427	0.11	0.0156	9606.ENSP00000064780,9606.ENSP00000209728,9606.ENSP00000212015,9606.ENSP00000215904,9606.ENSP00000216037,9606.ENSP00000216117,9606.ENSP00000216797,9606.ENSP00000220751,9606.ENSP00000223095,9606.ENSP00000224140,9606.ENSP00000225174,9606.ENSP00000226574,9606.ENSP00000227752,9606.ENSP00000228606,9606.ENSP00000228872,9606.ENSP00000229416,9606.ENSP00000235382,9606.ENSP00000239223,9606.ENSP00000239938,…	RELT,CDC6,SIRT1,PDXP,XBP1,HMOX1,NFKBIA,RIPK2,SERPINE1,SETX,PPIF,NFKB1,IL10RA,CYP27B1,CDKN1B,GCLC,RGS2,DUSP1,EGR1,KALRN,EGR2,EREG,INSIG2,FOSB,TICAM1,RAF1,MICB,JUND,SESN2,RARA,KDM6B,JAG1,BTG1,MBD2,IRAK2,AKIRIN2,RAB11FIP5,THBS1,PIK3C3,ADNP2,PRDX1,SLC9A1,RAPGEF2,ICAM1,SRF,GAL,EIF2B2,AKAP8,RHOB,TNFRSF10B,PAK1,CCRN4L,FER,QDPR,CA2,CA3,PPARG,HMGCR,BTG2,STAT5B,CXCL3,CXCL5,AQP3,TSC1,HSP90B1,CRK,FADD,IL12A,…
GO:0019216	regulation of lipid metabolic process	55	373	0.21	0.0156	9606.ENSP00000212015,9606.ENSP00000216037,9606.ENSP00000221086,9606.ENSP00000226574,9606.ENSP00000228606,9606.ENSP00000239938,9606.ENSP00000243045,9606.ENSP00000244050,9606.ENSP00000245787,9606.ENSP00000254101,9606.ENSP00000264775,9606.ENSP00000265643,9606.ENSP00000265896,9606.ENSP00000268184,9606.ENSP00000270162,9606.ENSP00000276914,9606.ENSP00000277746,9606.ENSP00000281708,9606.ENSP00000287820,…	SIRT1,XBP1,MTMR9,NFKB1,CYP27B1,EGR1,ORMDL2,SNAI1,INSIG2,PRKAB2,PPAP2A,GAL,SQLE,CRTC3,SIK1,PLIN2,NRBF2,FBXW7,PPARG,PRKAG2,HMGCR,STAT5B,FGF19,KIAA0226,PRKCE,NR1D2,PANK2,PIBF1,HMGCS1,PDGFB,CAV1,INSIG1,NFYA,PDGFA,DHCR7,ADIPOR2,PROX1,SORBS1,ANKRD1,KLF4,BMP2,SIN3B,GPS2,ALAS1,PDP1,MTMR3,FHL2,CREB1,ABHD5,CYR61,TXNRD1,MVK,LDLR,SEC14L2,NR4A3
GO:0016570	histone modification	52	347	0.22	0.0156	9606.ENSP00000212015,9606.ENSP00000216267,9606.ENSP00000228437,9606.ENSP00000233630,9606.ENSP00000235372,9606.ENSP00000254657,9606.ENSP00000254846,9606.ENSP00000256398,9606.ENSP00000262294,9606.ENSP00000263062,9606.ENSP00000264183,9606.ENSP00000265165,9606.ENSP00000302898,9606.ENSP00000308022,9606.ENSP00000314420,9606.ENSP00000319169,9606.ENSP00000320898,9606.ENSP00000325326,9606.ENSP00000339566,…	SIRT1,BRD1,PRDM4,PCGF1,PRDM2,PER2,KDM6B,ELP3,TRIM37,EPC1,ARID4B,LEF1,AURKC,TADA2B,PER1,PRMT5,RNF168,ZNF335,HIST1H1C,WAC,ARID4A,SFPQ,BRPF3,PHF8,CTR9,KDM5B,CRTC2,PCGF6,MRGBP,RLF,EYA3,UIMC1,KDM6A,SIN3B,TAF9,JMJD2C,BRPF1,USP49,JMJD1C,KDM5A,KDM3A,JMJD6,KANSL2,RYBP,KDM2A,ATXN7,USP36,TET2,TRIM16,RPS6KA5,JADE3,NTMT1
GO:0045737	positive regulation of cyclin-dependent protein serine/threonine kinase activity	11	33	0.57	0.0156	9606.ENSP00000209728,9606.ENSP00000228872,9606.ENSP00000261254,9606.ENSP00000264157,9606.ENSP00000295926,9606.ENSP00000309968,9606.ENSP00000330382,9606.ENSP00000335628,9606.ENSP00000355925,9606.ENSP00000362608,9606.ENSP00000368664	CDC6,CDKN1B,CCND2,CCNT2,CCNL1,ADAM17,PDGFB,SPDYA,PROX1,PIM1,RGCC
GO:0006508	proteolysis	144	1203	0.12	0.016	9606.ENSP00000157812,9606.ENSP00000158771,9606.ENSP00000161006,9606.ENSP00000171111,9606.ENSP00000185150,9606.ENSP00000209884,9606.ENSP00000212015,9606.ENSP00000216037,9606.ENSP00000216039,9606.ENSP00000216085,9606.ENSP00000216797,9606.ENSP00000217402,9606.ENSP00000219313,9606.ENSP00000220751,9606.ENSP00000226574,9606.ENSP00000237455,9606.ENSP00000242719,9606.ENSP00000247977,9606.ENSP00000248958,…	PSMC4,DERL2,PRSS22,KEAP1,ERLEC1,KLHL20,SIRT1,XBP1,JOSD1,RHBDD3,NFKBIA,CHMP4B,PSMD7,RIPK2,NFKB1,RNF103,RNF11,FBXL12,SDF2L1,DNAJB9,TRPC4AP,USPL1,RNF122,ADAM19,KIAA0368,RIPK1,USP2,MMP13,PSMD11,FAF2,PIK3C3,UFD1L,BIRC3,PSMD3,TINAGL1,PRSS23,BTBD11,FBXW7,USP12,SENP2,UBAP1,HSP90B1,KCTD5,FADD,LRP8,CDC25A,RNF139,TMEM208,DESI2,RNF181,TADA2B,RCE1,ADAM17,NRIP3,FBXO45,CFLAR,KCTD2,KLHL11,TOLLIP,NUP98,RBBP6,VPS3…
GO:0046890	regulation of lipid biosynthetic process	31	174	0.3	0.0165	9606.ENSP00000212015,9606.ENSP00000216037,9606.ENSP00000226574,9606.ENSP00000228606,9606.ENSP00000239938,9606.ENSP00000243045,9606.ENSP00000244050,9606.ENSP00000245787,9606.ENSP00000254101,9606.ENSP00000265896,9606.ENSP00000270162,9606.ENSP00000281708,9606.ENSP00000287878,9606.ENSP00000287936,9606.ENSP00000294312,9606.ENSP00000317144,9606.ENSP00000322706,9606.ENSP00000330382,9606.ENSP00000344741,…	SIRT1,XBP1,NFKB1,CYP27B1,EGR1,ORMDL2,SNAI1,INSIG2,PRKAB2,SQLE,SIK1,FBXW7,PRKAG2,HMGCR,FGF19,PIBF1,HMGCS1,PDGFB,INSIG1,NFYA,PDGFA,DHCR7,ADIPOR2,PROX1,SORBS1,BMP2,CREB1,CYR61,MVK,LDLR,SEC14L2
GO:0016569	covalent chromatin modification	53	357	0.22	0.0166	9606.ENSP00000212015,9606.ENSP00000216267,9606.ENSP00000228437,9606.ENSP00000233630,9606.ENSP00000235372,9606.ENSP00000254657,9606.ENSP00000254846,9606.ENSP00000256398,9606.ENSP00000256429,9606.ENSP00000262294,9606.ENSP00000263062,9606.ENSP00000264183,9606.ENSP00000265165,9606.ENSP00000302898,9606.ENSP00000308022,9606.ENSP00000314420,9606.ENSP00000319169,9606.ENSP00000320898,9606.ENSP00000325326,…	SIRT1,BRD1,PRDM4,PCGF1,PRDM2,PER2,KDM6B,ELP3,MBD2,TRIM37,EPC1,ARID4B,LEF1,AURKC,TADA2B,PER1,PRMT5,RNF168,ZNF335,HIST1H1C,WAC,ARID4A,SFPQ,BRPF3,PHF8,CTR9,KDM5B,CRTC2,PCGF6,MRGBP,RLF,EYA3,UIMC1,KDM6A,SIN3B,TAF9,JMJD2C,BRPF1,USP49,JMJD1C,KDM5A,KDM3A,JMJD6,KANSL2,RYBP,KDM2A,ATXN7,USP36,TET2,TRIM16,RPS6KA5,JADE3,NTMT1
GO:1900102	negative regulation of endoplasmic reticulum unfolded protein response	7	13	0.78	0.0166	9606.ENSP00000200453,9606.ENSP00000216037,9606.ENSP00000249356,9606.ENSP00000324173,9606.ENSP00000356156,9606.ENSP00000360683,9606.ENSP00000417273	PPP1R15A,XBP1,DNAJB9,HSPA5,PPP1R15B,PTPN1,NCK1
GO:0022407	regulation of cell-cell adhesion	54	366	0.21	0.0168	9606.ENSP00000166139,9606.ENSP00000216037,9606.ENSP00000220751,9606.ENSP00000245414,9606.ENSP00000245817,9606.ENSP00000254066,9606.ENSP00000254958,9606.ENSP00000257527,9606.ENSP00000263056,9606.ENSP00000264832,9606.ENSP00000265165,9606.ENSP00000278568,9606.ENSP00000284273,9606.ENSP00000293328,9606.ENSP00000300305,9606.ENSP00000301838,9606.ENSP00000303231,9606.ENSP00000305422,9606.ENSP00000318057,…	FSTL3,XBP1,RIPK2,IRF1,TNFSF9,RARA,JAG1,ADAM19,MAP3K8,ICAM1,LEF1,PAK1,UBASH3B,STAT5B,RUNX1,FADD,IL12A,CEBPB,EGR3,HSPH1,MALT1,NFKBIZ,CAV1,NRARP,BTN2A2,PELI1,DUSP10,BCL10,PPAP2B,DLG5,SDC4,ZC3H12A,PTAFR,KLF4,HLA-E,BMP2,CD83,RGCC,GCNT2,CD274,GPNMB,ETS1,IL4R,MBP,RDX,BCL6,CYLD,NCK1,TENM3,FAM49B,TRAF6,CITED2,ITCH,NR4A3
GO:0042795	snRNA transcription by RNA polymerase II	17	71	0.42	0.0168	9606.ENSP00000216294,9606.ENSP00000237853,9606.ENSP00000262809,9606.ENSP00000264157,9606.ENSP00000272645,9606.ENSP00000283875,9606.ENSP00000296564,9606.ENSP00000310260,9606.ENSP00000370201,9606.ENSP00000375942,9606.ENSP00000379847,9606.ENSP00000403683,9606.ENSP00000415433,9606.ENSP00000431603,9606.ENSP00000434466,9606.ENSP00000476948,9606.ENSP00000480421	SNAPC1,ELL2,ELL,CCNT2,POLR2D,GTF2E1,ICE1,INTS6,TAF9,TBP,ZNF143,NABP1,INTS12,POU2F2,INTS4,RPAP2,SRRT
GO:0045786	negative regulation of cell cycle	71	517	0.18	0.017	9606.ENSP00000200453,9606.ENSP00000202556,9606.ENSP00000209728,9606.ENSP00000216420,9606.ENSP00000228872,9606.ENSP00000239223,9606.ENSP00000245414,9606.ENSP00000249075,9606.ENSP00000254101,9606.ENSP00000258770,9606.ENSP00000258774,9606.ENSP00000260356,9606.ENSP00000262294,9606.ENSP00000263062,9606.ENSP00000263620,9606.ENSP00000272233,9606.ENSP00000274289,9606.ENSP00000276925,9606.ENSP00000279147,…	PPP1R15A,PPP1R13B,CDC6,CGRRF1,CDKN1B,DUSP1,IRF1,LIF,PRKAB2,TBRG4,HUS1,THBS1,TRIM37,EPC1,ARID3A,RHOB,PLK2,CDKN2B,ORAOV1,FBXW7,WHAMM,PRKAG2,BTG2,IL12A,CXCL8,PINX1,DCUN1D3,CALR,YAF2,SMAD3,OVOL1,ZBTB49,SFN,CREB3,MCPH1,BTG3,WAC,RASSF1,PLAGL1,CDC14A,IRF6,PEA15,PCGF6,GADD45A,PLK3,RRAGC,KLF4,TSPYL2,ZBTB17,UIMC1,BMP2,RGCC,NKX3-1,E2F6,GPNMB,DMRT1,LATS2,ETS1,BCL6,CDKN1A,GIGYF2,PNPT1,NABP1,MAD2L1BP,SKIL,RYBP…
GO:0043406	positive regulation of MAP kinase activity	42	264	0.25	0.017	9606.ENSP00000013125,9606.ENSP00000056217,9606.ENSP00000215631,9606.ENSP00000220751,9606.ENSP00000251849,9606.ENSP00000252809,9606.ENSP00000256458,9606.ENSP00000259808,9606.ENSP00000260356,9606.ENSP00000262013,9606.ENSP00000263056,9606.ENSP00000263881,9606.ENSP00000264198,9606.ENSP00000265026,9606.ENSP00000278568,9606.ENSP00000288602,9606.ENSP00000295400,9606.ENSP00000300574,9606.ENSP00000304501,…	MAP4K5,ARHGEF5,GADD45B,RIPK2,RAF1,GDF15,IRAK2,RIPK1,THBS1,SPAG9,MAP3K8,MAP4K3,MUL1,MAP3K13,PAK1,BRAF,TGFA,CRK,ADORA2B,DVL3,KARS,PDGFB,MAP2K3,PDGFA,AKAP13,PEA15,DUSP5,AVPI1,GADD45A,PTPN1,DKK1,DAXX,BMP2,EDN1,TLR6,MAP2K4,CSB-PGBD3,TRAF6,UBC,MAP3K9,MAP3K14,IKBKG
GO:0007254	JNK cascade	19	85	0.39	0.0171	9606.ENSP00000013125,9606.ENSP00000220751,9606.ENSP00000256458,9606.ENSP00000259808,9606.ENSP00000262013,9606.ENSP00000263881,9606.ENSP00000264198,9606.ENSP00000265026,9606.ENSP00000304501,9606.ENSP00000312150,9606.ENSP00000360683,9606.ENSP00000363668,9606.ENSP00000370104,9606.ENSP00000410402,9606.ENSP00000423550,9606.ENSP00000433623,9606.ENSP00000441543,9606.ENSP00000451263,9606.ENSP00000483825	MAP4K5,RIPK2,IRAK2,RIPK1,SPAG9,MAP4K3,MUL1,MAP3K13,ADORA2B,TRIB1,PTPN1,DAXX,GPS2,MAP2K4,CSB-PGBD3,TRAF6,UBC,MAP3K9,IKBKG
GO:0050793	regulation of developmental process	265	2416	0.09	0.0172	9606.ENSP00000164024,9606.ENSP00000166139,9606.ENSP00000171111,9606.ENSP00000198767,9606.ENSP00000212015,9606.ENSP00000216037,9606.ENSP00000216117,9606.ENSP00000216797,9606.ENSP00000220751,9606.ENSP00000223095,9606.ENSP00000224140,9606.ENSP00000226574,9606.ENSP00000227322,9606.ENSP00000228606,9606.ENSP00000228872,9606.ENSP00000234198,9606.ENSP00000234420,9606.ENSP00000235382,9606.ENSP00000236925,…	CELSR3,FSTL3,KEAP1,RRN3,SIRT1,XBP1,HMOX1,NFKBIA,RIPK2,SERPINE1,SETX,NFKB1,ZPR1,CYP27B1,CDKN1B,DLX2,MSH6,RGS2,CAMSAP2,EGR1,KALRN,BHLHE41,SNAI1,EREG,IRF1,TNFSF9,LIF,STRIP2,DLL4,RAF1,GDF15,JUND,NUMBL,RARA,PER2,H3F3B,JAG1,BTG1,TBX3,RIPK1,SDCBP,THBS1,LHX5,MAPK6,SEMA7A,SPAG9,ACIN1,C19orf10,IL1A,ACVR1,CCNT2,MUL1,RAPGEF2,ICAM1,LEF1,FSTL4,SRF,NRP1,GAL,JDP2,KRT10,SIK1,RHOB,EAF2,PLK2,PAK1,CCRN4L,FBXW7,NIPBL…
GO:0044092	negative regulation of molecular function	135	1119	0.13	0.0172	9606.ENSP00000014914,9606.ENSP00000171111,9606.ENSP00000200453,9606.ENSP00000212015,9606.ENSP00000215631,9606.ENSP00000216117,9606.ENSP00000216797,9606.ENSP00000218516,9606.ENSP00000223095,9606.ENSP00000225174,9606.ENSP00000226574,9606.ENSP00000228515,9606.ENSP00000228606,9606.ENSP00000228872,9606.ENSP00000235382,9606.ENSP00000239223,9606.ENSP00000244230,9606.ENSP00000251849,9606.ENSP00000252992,…	GPRC5A,KEAP1,PPP1R15A,SIRT1,GADD45B,HMOX1,NFKBIA,GLA,SERPINE1,PPIF,NFKB1,CSRNP2,CYP27B1,CDKN1B,RGS2,DUSP1,MPHOSPH10,RAF1,CEP85,ZCCHC9,PER2,EIF2S1,IRAK2,BHLHE40,THBS1,FAF2,SPAG9,TMED2,TRIM37,NLRC5,ELL,BIRC3,MTRR,NPR3,LEF1,BTAF1,SIK1,NFKBIE,TNFRSF10B,CDKN2B,ZNF462,UBASH3B,SH3RF1,PPARG,PRKAG2,HMGCR,DUSP2,SENP2,KIAA0226,ANXA5,GEM,TSC1,DUSP16,MIDN,IBTK,PRKCE,YWHAG,MEPCE,ZNF431,BOD1,TNFRSF10D,TRIB1,AOC…
GO:0001568	blood vessel development	65	464	0.19	0.0173	9606.ENSP00000212015,9606.ENSP00000216037,9606.ENSP00000216117,9606.ENSP00000223095,9606.ENSP00000239938,9606.ENSP00000244869,9606.ENSP00000249749,9606.ENSP00000254958,9606.ENSP00000257566,9606.ENSP00000260356,9606.ENSP00000262225,9606.ENSP00000262947,9606.ENSP00000263640,9606.ENSP00000264036,9606.ENSP00000264431,9606.ENSP00000265165,9606.ENSP00000265354,9606.ENSP00000265371,9606.ENSP00000272233,…	SIRT1,XBP1,HMOX1,SERPINE1,EGR1,EREG,DLL4,JAG1,TBX3,THBS1,TMED2,C19orf10,ACVR1,MCAM,RAPGEF2,LEF1,SRF,NRP1,RHOB,ITGA5,DCTN5,JUNB,LUZP1,CXCL8,EIF2AK3,FOSL1,HEG1,EGR3,TNFRSF12A,SOCS3,PDGFB,ARID2,CAV1,PDGFA,DHCR7,NRARP,ADIPOR2,EPHA2,ANKRD17,PROX1,CTGF,EFNA1,NUS1,ECM1,PRDM1,RBM15,NSDHL,JUN,ZC3H12A,BAK1,SHB,EDN1,NKX3-1,ETS1,AIMP1,C1GALT1,CHD7,JMJD6,CYR61,GNA13,TIPARP,ADM,NR4A1,PCSK5,DDIT3
GO:0006611	protein export from nucleus	27	144	0.32	0.0173	9606.ENSP00000242480,9606.ENSP00000254998,9606.ENSP00000272645,9606.ENSP00000291552,9606.ENSP00000297990,9606.ENSP00000298552,9606.ENSP00000298573,9606.ENSP00000302790,9606.ENSP00000316032,9606.ENSP00000320866,9606.ENSP00000322396,9606.ENSP00000339245,9606.ENSP00000345895,9606.ENSP00000352400,9606.ENSP00000354621,9606.ENSP00000356548,9606.ENSP00000362820,9606.ENSP00000363384,9606.ENSP00000376276,…	EGR2,NXT1,POLR2D,U2AFBP,NOL6,TSC1,DUSP16,XPO6,NUP98,CALR,RRS1,YTHDC1,NUP50,NUP214,SMURF1,LTV1,SRSF3,ZNF593,SRSF2,POM121,RAE1,AGFG1,SMG1,THOC5,ALYREF,NXF1,NUP153
GO:2000234	positive regulation of rRNA processing	6	9	0.87	0.0173	9606.ENSP00000199320,9606.ENSP00000283109,9606.ENSP00000296792,9606.ENSP00000314193,9606.ENSP00000369162,9606.ENSP00000384302	DIMT1,RIOK2,UTP15,WDR75,RIOK1,WDR43
GO:0002221	pattern recognition receptor signaling pathway	23	114	0.35	0.0174	9606.ENSP00000216797,9606.ENSP00000220751,9606.ENSP00000248244,9606.ENSP00000256458,9606.ENSP00000259808,9606.ENSP00000262039,9606.ENSP00000299767,9606.ENSP00000301838,9606.ENSP00000306124,9606.ENSP00000359424,9606.ENSP00000359612,9606.ENSP00000362965,9606.ENSP00000369213,9606.ENSP00000369373,9606.ENSP00000384273,9606.ENSP00000389600,9606.ENSP00000392025,9606.ENSP00000433623,9606.ENSP00000441543,…	NFKBIA,RIPK2,TICAM1,IRAK2,RIPK1,PIK3C3,HSP90B1,FADD,PRKCE,CHUK,BCL10,PTAFR,DDX58,TRIM5,RELA,TLR6,CYLD,TRAF6,UBC,TRAF3,ITCH,TNFAIP3,IKBKG
GO:1901565	organonitrogen compound catabolic process	118	958	0.14	0.0183	9606.ENSP00000157812,9606.ENSP00000158771,9606.ENSP00000171111,9606.ENSP00000185150,9606.ENSP00000209884,9606.ENSP00000212015,9606.ENSP00000215904,9606.ENSP00000216037,9606.ENSP00000216117,9606.ENSP00000217402,9606.ENSP00000218516,9606.ENSP00000219313,9606.ENSP00000222982,9606.ENSP00000237455,9606.ENSP00000242719,9606.ENSP00000247977,9606.ENSP00000248958,9606.ENSP00000249356,9606.ENSP00000251108,…	PSMC4,DERL2,KEAP1,ERLEC1,KLHL20,SIRT1,PDXP,XBP1,HMOX1,CHMP4B,GLA,PSMD7,CYP3A5,RNF103,RNF11,FBXL12,SDF2L1,DNAJB9,CDADC1,TRPC4AP,RNF122,KIAA0368,RIPK1,USP2,PSMD11,FAF2,UFD1L,SLC9A1,PSMD3,MTRR,BTBD11,QDPR,FBXW7,USP12,TMEM199,CHAC2,UBAP1,HSP90B1,KCTD5,RNF139,RNF181,FBXO45,KCTD2,KLHL11,TOLLIP,CLU,RBBP6,VPS37A,RNF168,RCHY1,SIAH2,HSPA5,PMAIP1,YOD1,CLN8,UPP1,NPLOC4,RAB12,PDE4B,KLHL25,KCTD21,NT5C2,RNF41,K…
GO:0035335	peptidyl-tyrosine dephosphorylation	21	100	0.37	0.0184	9606.ENSP00000239223,9606.ENSP00000283228,9606.ENSP00000284273,9606.ENSP00000288943,9606.ENSP00000298573,9606.ENSP00000303706,9606.ENSP00000315713,9606.ENSP00000344909,9606.ENSP00000354916,9606.ENSP00000355866,9606.ENSP00000356920,9606.ENSP00000358596,9606.ENSP00000360108,9606.ENSP00000360683,9606.ENSP00000362978,9606.ENSP00000365528,9606.ENSP00000380530,9606.ENSP00000383089,9606.ENSP00000384651,…	DUSP1,PTPRR,UBASH3B,DUSP2,DUSP16,CDC25A,SSH1,PTP4A2,CDC14A,DUSP10,DUSP12,DUSP5,DNAJC6,PTPN1,EYA3,PTPRH,DUSP8,TPTE2,MTMR3,PTPN21,DUSP14
GO:0016071	mRNA metabolic process	87	667	0.16	0.0191	9606.ENSP00000170564,9606.ENSP00000216252,9606.ENSP00000217109,9606.ENSP00000224140,9606.ENSP00000227322,9606.ENSP00000244869,9606.ENSP00000257181,9606.ENSP00000258770,9606.ENSP00000262710,9606.ENSP00000265354,9606.ENSP00000265963,9606.ENSP00000267287,9606.ENSP00000268483,9606.ENSP00000272348,9606.ENSP00000272645,9606.ENSP00000274311,9606.ENSP00000280614,9606.ENSP00000291552,9606.ENSP00000297071,…	GPATCH1,PHF5A,CSTF1,SETX,ZPR1,EREG,PRPF38A,TBRG4,ACIN1,SRF,GTF2H1,MBNL2,TXNL4B,SNRPG,POLR2D,PELO,CCRN4L,U2AFBP,TRA2A,KIAA1429,PCF11,SF3B3,PDE12,TRMT10C,PRMT9,ZHX2,PRPF3,RBBP6,SUPT6H,PRMT5,EDC3,AKAP17A,PPP2R2A,DHX34,PNRC1,YTHDC1,GSPT2,PSPC1,CPSF7,PRPF39,PPP4R2,SFPQ,WTAP,ARNT,SUPV3L1,ETF1,ADARB1,HBS1L,KIAA0907,RBM15,PDCD11,PTBP2,ZC3H12A,AGO3,SRSF3,AAR2,PRPF4,HABP4,HSPA1B,ZCCHC6,FASTKD5,SMN1,RNMT,SA…
GO:2000026	regulation of multicellular organismal development	211	1876	0.1	0.0197	9606.ENSP00000164024,9606.ENSP00000166139,9606.ENSP00000171111,9606.ENSP00000198767,9606.ENSP00000212015,9606.ENSP00000216037,9606.ENSP00000216117,9606.ENSP00000216797,9606.ENSP00000220751,9606.ENSP00000223095,9606.ENSP00000224140,9606.ENSP00000227322,9606.ENSP00000228606,9606.ENSP00000228872,9606.ENSP00000234198,9606.ENSP00000234420,9606.ENSP00000235382,9606.ENSP00000236925,9606.ENSP00000239938,…	CELSR3,FSTL3,KEAP1,RRN3,SIRT1,XBP1,HMOX1,NFKBIA,RIPK2,SERPINE1,SETX,ZPR1,CYP27B1,CDKN1B,DLX2,MSH6,RGS2,CAMSAP2,EGR1,KALRN,SNAI1,IRF1,TNFSF9,LIF,DLL4,NUMBL,RARA,PER2,H3F3B,JAG1,BTG1,TBX3,RIPK1,SDCBP,THBS1,LHX5,MAPK6,SEMA7A,SPAG9,ACIN1,C19orf10,IL1A,ACVR1,MUL1,RAPGEF2,LEF1,FSTL4,SRF,NRP1,GAL,RHOB,EAF2,PLK2,PAK1,CCRN4L,FBXW7,NIPBL,UBASH3B,SH3RF1,FLCN,CA2,PPARG,HMGCR,ISL2,STAT5B,ITGA5,MITF,AQP3,TSC1,…
GO:2000377	regulation of reactive oxygen species metabolic process	30	169	0.29	0.0198	9606.ENSP00000179259,9606.ENSP00000218516,9606.ENSP00000232496,9606.ENSP00000248244,9606.ENSP00000259808,9606.ENSP00000260356,9606.ENSP00000264832,9606.ENSP00000296677,9606.ENSP00000306328,9606.ENSP00000312455,9606.ENSP00000315130,9606.ENSP00000319192,9606.ENSP00000330382,9606.ENSP00000332973,9606.ENSP00000339191,9606.ENSP00000342755,9606.ENSP00000353032,9606.ENSP00000355133,9606.ENSP00000360025,…	C12orf5,GLA,TUSC2,TICAM1,RIPK1,THBS1,ICAM1,F2RL1,SLC25A33,CFLAR,CLU,STK17A,PDGFB,SMAD3,CAV1,RNF41,P2RX4,NOS1AP,GADD45A,ZC3H12A,KLF4,EDN1,XDH,NFE2L2,VIMP,CDKN1A,FOXO3,TLR6,CRYAB,BIRC2
GO:0071222	cellular response to lipopolysaccharide	27	146	0.31	0.0203	9606.ENSP00000216037,9606.ENSP00000216797,9606.ENSP00000220751,9606.ENSP00000223095,9606.ENSP00000226574,9606.ENSP00000248244,9606.ENSP00000254066,9606.ENSP00000256458,9606.ENSP00000264832,9606.ENSP00000269701,9606.ENSP00000303231,9606.ENSP00000305422,9606.ENSP00000306124,9606.ENSP00000306512,9606.ENSP00000312988,9606.ENSP00000332116,9606.ENSP00000355013,9606.ENSP00000359478,9606.ENSP00000360762,…	XBP1,NFKBIA,RIPK2,SERPINE1,NFKB1,TICAM1,RARA,IRAK2,ICAM1,AKAP8,IL12A,CEBPB,PRKCE,CXCL8,NFKBIB,PDE4B,CTR9,ABCC2,ANKRD1,ZC3H12A,PTAFR,VIMP,RELA,TRAF6,LITAF,ZFP36,TNFAIP3
GO:0016577	histone demethylation	10	29	0.58	0.0203	9606.ENSP00000254846,9606.ENSP00000350676,9606.ENSP00000356234,9606.ENSP00000367203,9606.ENSP00000370710,9606.ENSP00000382204,9606.ENSP00000382688,9606.ENSP00000386660,9606.ENSP00000394085,9606.ENSP00000432786	KDM6B,PHF8,KDM5B,KDM6A,JMJD2C,JMJD1C,KDM5A,KDM3A,JMJD6,KDM2A
GO:2000379	positive regulation of reactive oxygen species metabolic process	20	94	0.37	0.0207	9606.ENSP00000248244,9606.ENSP00000259808,9606.ENSP00000260356,9606.ENSP00000264832,9606.ENSP00000296677,9606.ENSP00000315130,9606.ENSP00000330382,9606.ENSP00000332973,9606.ENSP00000342755,9606.ENSP00000353032,9606.ENSP00000355133,9606.ENSP00000360025,9606.ENSP00000362179,9606.ENSP00000363804,9606.ENSP00000368683,9606.ENSP00000368727,9606.ENSP00000380252,9606.ENSP00000384849,9606.ENSP00000385824,…	TICAM1,RIPK1,THBS1,ICAM1,F2RL1,CLU,PDGFB,SMAD3,RNF41,P2RX4,NOS1AP,GADD45A,ZC3H12A,KLF4,EDN1,XDH,NFE2L2,CDKN1A,FOXO3,TLR6
GO:0060759	regulation of response to cytokine stimulus	29	162	0.3	0.021	9606.ENSP00000220751,9606.ENSP00000239882,9606.ENSP00000256458,9606.ENSP00000259808,9606.ENSP00000262510,9606.ENSP00000263464,9606.ENSP00000264198,9606.ENSP00000287820,9606.ENSP00000290219,9606.ENSP00000296677,9606.ENSP00000300305,9606.ENSP00000301838,9606.ENSP00000309968,9606.ENSP00000327513,9606.ENSP00000330341,9606.ENSP00000339191,9606.ENSP00000358045,9606.ENSP00000359424,9606.ENSP00000360683,…	RIPK2,ELF1,IRAK2,RIPK1,NLRC5,BIRC3,MUL1,PPARG,IFNGR2,F2RL1,RUNX1,FADD,ADAM17,CSF1,SOCS3,CAV1,ECM1,CHUK,PTPN1,KLF4,HSPA1B,EDN1,DDX58,GPS2,TAF9,CYLD,BIRC2,TNFAIP3,IKBKG
GO:0010952	positive regulation of peptidase activity	31	178	0.29	0.0213	9606.ENSP00000212015,9606.ENSP00000220751,9606.ENSP00000250457,9606.ENSP00000257787,9606.ENSP00000259808,9606.ENSP00000260442,9606.ENSP00000264198,9606.ENSP00000276431,9606.ENSP00000287820,9606.ENSP00000295992,9606.ENSP00000301838,9606.ENSP00000307235,9606.ENSP00000312455,9606.ENSP00000325448,9606.ENSP00000326119,9606.ENSP00000332973,9606.ENSP00000339191,9606.ENSP00000351777,9606.ENSP00000356954,…	SIRT1,RIPK2,EGLN3,AKIRIN2,RIPK1,BCL2L10,MUL1,TNFRSF10B,PPARG,PCOLCE2,FADD,EIF2AK3,CFLAR,KARS,PMAIP1,SMAD3,CAV1,VCP,CTGF,EFNA1,BCL10,MTCH1,BAK1,XDH,NKX3-1,SLC11A2,MBP,PSME4,DIABLO,CYR61,BCL2L13
GO:0060544	regulation of necroptotic process	7	14	0.74	0.0217	9606.ENSP00000259808,9606.ENSP00000263464,9606.ENSP00000281456,9606.ENSP00000301838,9606.ENSP00000312455,9606.ENSP00000339191,9606.ENSP00000477613	RIPK1,BIRC3,SLC25A4,FADD,CFLAR,CAV1,BIRC2
GO:0002683	negative regulation of immune system process	60	425	0.2	0.0219	9606.ENSP00000166139,9606.ENSP00000216085,9606.ENSP00000216117,9606.ENSP00000216797,9606.ENSP00000239882,9606.ENSP00000245414,9606.ENSP00000248244,9606.ENSP00000252229,9606.ENSP00000254066,9606.ENSP00000257604,9606.ENSP00000260356,9606.ENSP00000262510,9606.ENSP00000263202,9606.ENSP00000264198,9606.ENSP00000265643,9606.ENSP00000281092,9606.ENSP00000281708,9606.ENSP00000284273,9606.ENSP00000287820,…	FSTL3,RHBDD3,HMOX1,NFKBIA,ELF1,IRF1,TICAM1,MICB,RARA,TRAFD1,THBS1,NLRC5,UFD1L,MUL1,GAL,FER,FBXW7,UBASH3B,PPARG,STAT5B,F2RL1,RUNX1,CRK,FADD,CEBPB,TRIB1,PIBF1,NPLOC4,RIOK3,NRARP,BTN2A2,TRIM38,PELI1,GPATCH3,CTR9,DUSP10,PRDM1,RBM15,BCL10,TSC22D3,DLG5,SDC4,ZC3H12A,HLA-E,SERPINB9,GPS2,CD274,GPNMB,SEC14L1,IL4R,NFE2L2,VIMP,BCL6,TLR6,CYLD,MICA,LDLR,ZFP36,ITCH,TNFAIP3
GO:0050687	negative regulation of defense response to virus	9	24	0.62	0.0219	9606.ENSP00000252229,9606.ENSP00000263202,9606.ENSP00000264198,9606.ENSP00000331487,9606.ENSP00000341874,9606.ENSP00000349596,9606.ENSP00000354645,9606.ENSP00000376268,9606.ENSP00000480499	MICB,UFD1L,MUL1,NPLOC4,RIOK3,TRIM38,GPATCH3,SEC14L1,ITCH
GO:0016310	phosphorylation	146	1236	0.12	0.022	9606.ENSP00000013125,9606.ENSP00000216085,9606.ENSP00000220751,9606.ENSP00000224140,9606.ENSP00000226574,9606.ENSP00000228872,9606.ENSP00000229395,9606.ENSP00000230990,9606.ENSP00000240874,9606.ENSP00000244869,9606.ENSP00000246914,9606.ENSP00000249075,9606.ENSP00000251849,9606.ENSP00000254066,9606.ENSP00000254101,9606.ENSP00000256383,9606.ENSP00000256458,9606.ENSP00000258770,9606.ENSP00000258774,…	MAP4K5,RHBDD3,RIPK2,SETX,NFKB1,CDKN1B,FGFR1OP2,HBEGF,KALRN,EREG,WNK4,LIF,RAF1,RARA,PRKAB2,EIF2S1,IRAK2,TBRG4,HUS1,RIPK1,COX10,MAPK6,SPAG9,PIK3C3,MAP3K8,ITPKC,ACVR1,MAP4K3,CCNT2,MUL1,PIKFYVE,RAPGEF2,MAP3K13,NRP1,CHKA,GTF2H1,SIK1,PLK2,PAK1,FER,RIOK2,PRKAG2,IPPK,BRAF,STAT5B,FGF19,SNRK,AURKC,ADORA2B,PRKCE,PPM1D,EIF2AK3,TRIB1,PANK2,TOLLIP,TLK2,CLK4,PIBF1,STK17A,ENO3,KARS,DGKA,PDGFB,RIPK4,NT5C2,RIOK3,M…
GO:2001235	positive regulation of apoptotic signaling pathway	30	171	0.29	0.0226	9606.ENSP00000202556,9606.ENSP00000212015,9606.ENSP00000225174,9606.ENSP00000246229,9606.ENSP00000259808,9606.ENSP00000260356,9606.ENSP00000281708,9606.ENSP00000301838,9606.ENSP00000306330,9606.ENSP00000315130,9606.ENSP00000326119,9606.ENSP00000326737,9606.ENSP00000332973,9606.ENSP00000339191,9606.ENSP00000339328,9606.ENSP00000340989,9606.ENSP00000344352,9606.ENSP00000349748,9606.ENSP00000357055,…	PPP1R13B,SIRT1,PPIF,PLAGL2,RIPK1,THBS1,FBXW7,FADD,YWHAG,CLU,PMAIP1,TNFRSF12A,SMAD3,CAV1,PLAUR,SFN,ATF3,SFPQ,PEA15,MCL1,BCL10,BAK1,TRIM39,NKX3-1,CYLD,SKIL,NCK1,BCLAF1,DDIT3,DEDD2
GO:0051336	regulation of hydrolase activity	146	1238	0.12	0.0232	9606.ENSP00000033079,9606.ENSP00000056217,9606.ENSP00000200453,9606.ENSP00000212015,9606.ENSP00000220751,9606.ENSP00000221086,9606.ENSP00000223095,9606.ENSP00000225174,9606.ENSP00000228515,9606.ENSP00000234420,9606.ENSP00000235382,9606.ENSP00000240874,9606.ENSP00000244230,9606.ENSP00000250457,9606.ENSP00000251849,9606.ENSP00000254037,9606.ENSP00000254322,9606.ENSP00000257787,9606.ENSP00000259808,…	FAM13B,ARHGEF5,PPP1R15A,SIRT1,RIPK2,MTMR9,SERPINE1,PPIF,CSRNP2,MSH6,RGS2,KALRN,MPHOSPH10,EGLN3,RAF1,ZCCHC9,DNAJB1,AKIRIN2,RIPK1,THBS1,BCL2L10,ARHGAP29,PREB,TMED2,ELL,ARFGAP3,BIRC3,MUL1,ALS2,RASGEF1B,RAPGEF2,ICAM1,LEF1,NRP1,TNFRSF10B,SH3RF1,PPARG,ARHGAP17,CDC42EP3,PCOLCE2,F2RL1,TSC1,ARHGAP42,HSP90B1,CRK,FADD,ARAP2,FNTA,EIF2AK3,PPP1R3B,BOD1,TNFRSF10D,CFLAR,DNAJA2,ARFGAP1,DVL3,SIAH2,PPP2R2A,KARS,PMA…
GO:0042254	ribosome biogenesis	42	270	0.24	0.0233	9606.ENSP00000198767,9606.ENSP00000199320,9606.ENSP00000212015,9606.ENSP00000230340,9606.ENSP00000244230,9606.ENSP00000254605,9606.ENSP00000258243,9606.ENSP00000261708,9606.ENSP00000265245,9606.ENSP00000275820,9606.ENSP00000283109,9606.ENSP00000296792,9606.ENSP00000297990,9606.ENSP00000298552,9606.ENSP00000301364,9606.ENSP00000306565,9606.ENSP00000308179,9606.ENSP00000308332,9606.ENSP00000310042,…	RRN3,DIMT1,SIRT1,BYSL,MPHOSPH10,RRP8,URB2,UTP6,LSG1,NOM1,RIOK2,UTP15,NOL6,TSC1,TSR1,ISG20,WDR3,UTP23,ZNF622,WDR75,RRS1,RPUSD2,ISG20L2,CIRH1A,RIOK3,WDR37,WDR55,LTV1,MDN1,PDCD11,DDX31,ZNF593,TEX10,PAK1IP1,RIOK1,NOP2,UTP14A,SETD4,WDR43,CHD7,EXOSC6,NOL8
GO:0071219	cellular response to molecule of bacterial origin	28	156	0.3	0.0239	9606.ENSP00000216037,9606.ENSP00000216797,9606.ENSP00000220751,9606.ENSP00000223095,9606.ENSP00000226574,9606.ENSP00000248244,9606.ENSP00000254066,9606.ENSP00000256458,9606.ENSP00000264832,9606.ENSP00000269701,9606.ENSP00000303231,9606.ENSP00000305422,9606.ENSP00000306124,9606.ENSP00000306512,9606.ENSP00000312988,9606.ENSP00000332116,9606.ENSP00000355013,9606.ENSP00000359478,9606.ENSP00000360762,…	XBP1,NFKBIA,RIPK2,SERPINE1,NFKB1,TICAM1,RARA,IRAK2,ICAM1,AKAP8,IL12A,CEBPB,PRKCE,CXCL8,NFKBIB,PDE4B,CTR9,ABCC2,ANKRD1,ZC3H12A,PTAFR,VIMP,RELA,TLR6,TRAF6,LITAF,ZFP36,TNFAIP3
GO:0032259	methylation	44	288	0.23	0.0247	9606.ENSP00000199320,9606.ENSP00000228437,9606.ENSP00000235372,9606.ENSP00000254605,9606.ENSP00000256015,9606.ENSP00000264183,9606.ENSP00000264668,9606.ENSP00000290551,9606.ENSP00000297591,9606.ENSP00000297994,9606.ENSP00000300209,9606.ENSP00000306245,9606.ENSP00000306682,9606.ENSP00000308546,9606.ENSP00000312356,9606.ENSP00000314396,9606.ENSP00000317177,9606.ENSP00000319169,9606.ENSP00000325326,…	DIMT1,PRDM4,PRDM2,RRP8,BTG1,ARID4B,MTRR,BTG2,KIAA1429,TRMT10B,METTL21B,FOS,PPM1D,MEPCE,TRMT10C,PRMT9,PLD6,PRMT5,ZNF335,HIST1H1C,ARID4A,PIWIL2,WTAP,ETF1,CTR9,PRDM1,RBM15,RLF,KDM6A,NDUFAF5,METTL22,NOP2,RNMT,TRMT44,VCPKMT,SETD4,KDM3A,CBLL1,MTO1,ZFP57,THUMPD2,TET2,PRDM11,NTMT1
GO:0009408	response to heat	19	89	0.37	0.0253	9606.ENSP00000216117,9606.ENSP00000229416,9606.ENSP00000252229,9606.ENSP00000256383,9606.ENSP00000260356,9606.ENSP00000263339,9606.ENSP00000266126,9606.ENSP00000272645,9606.ENSP00000301365,9606.ENSP00000314030,9606.ENSP00000356549,9606.ENSP00000358081,9606.ENSP00000359478,9606.ENSP00000359799,9606.ENSP00000363668,9606.ENSP00000364801,9606.ENSP00000378324,9606.ENSP00000384849,9606.ENSP00000413079	HMOX1,GCLC,MICB,EIF2S1,THBS1,IL1A,EIF2B2,POLR2D,TRPV3,DNAJA2,IER5,BAG3,ABCC2,DNAJB4,DAXX,HSPA1B,DNAJA4,CDKN1A,MICA
GO:0045639	positive regulation of myeloid cell differentiation	19	89	0.37	0.0253	9606.ENSP00000249075,9606.ENSP00000254958,9606.ENSP00000259808,9606.ENSP00000262710,9606.ENSP00000265165,9606.ENSP00000285379,9606.ENSP00000293328,9606.ENSP00000300305,9606.ENSP00000301838,9606.ENSP00000306245,9606.ENSP00000312150,9606.ENSP00000327513,9606.ENSP00000351407,9606.ENSP00000360266,9606.ENSP00000364801,9606.ENSP00000376436,9606.ENSP00000385824,9606.ENSP00000387699,9606.ENSP00000433623	LIF,JAG1,RIPK1,ACIN1,LEF1,CA2,STAT5B,RUNX1,FADD,FOS,TRIB1,CSF1,ARNT,JUN,HSPA1B,ETS1,FOXO3,CREB1,TRAF6
GO:0048199	vesicle targeting, to, from or within Golgi	16	68	0.42	0.0253	9606.ENSP00000222547,9606.ENSP00000260643,9606.ENSP00000262139,9606.ENSP00000262225,9606.ENSP00000280551,9606.ENSP00000291574,9606.ENSP00000294179,9606.ENSP00000295400,9606.ENSP00000325827,9606.ENSP00000330945,9606.ENSP00000346139,9606.ENSP00000358071,9606.ENSP00000378721,9606.ENSP00000381823,9606.ENSP00000390783,9606.ENSP00000444850	BET1,PREB,WIPI1,TMED2,SEC24D,TRAPPC10,STX5,TGFA,SEC16A,TMED9,TBC1D20,SEC23IP,SEC31A,SEC24A,SCFD1,USO1
GO:0090114	COPII-coated vesicle budding	16	68	0.42	0.0253	9606.ENSP00000222547,9606.ENSP00000260643,9606.ENSP00000262225,9606.ENSP00000280551,9606.ENSP00000291574,9606.ENSP00000294179,9606.ENSP00000295400,9606.ENSP00000325827,9606.ENSP00000338844,9606.ENSP00000346139,9606.ENSP00000358071,9606.ENSP00000362339,9606.ENSP00000378721,9606.ENSP00000381823,9606.ENSP00000390783,9606.ENSP00000444850	BET1,PREB,TMED2,SEC24D,TRAPPC10,STX5,TGFA,SEC16A,SEC23B,TBC1D20,SEC23IP,SAR1A,SEC31A,SEC24A,SCFD1,USO1
GO:0016241	regulation of macroautophagy	28	157	0.3	0.0256	9606.ENSP00000179259,9606.ENSP00000212015,9606.ENSP00000216117,9606.ENSP00000217402,9606.ENSP00000220751,9606.ENSP00000253063,9606.ENSP00000264380,9606.ENSP00000269228,9606.ENSP00000273047,9606.ENSP00000296343,9606.ENSP00000298552,9606.ENSP00000331748,9606.ENSP00000342755,9606.ENSP00000346986,9606.ENSP00000348455,9606.ENSP00000354621,9606.ENSP00000355605,9606.ENSP00000362092,9606.ENSP00000365692,…	C12orf5,SIRT1,HMOX1,CHMP4B,RIPK2,SESN2,PIKFYVE,NPC1,RAB5A,KIAA0226,TSC1,RAB12,RNF41,WAC,UVRAG,SMURF1,EXOC8,RRAGC,PIM2,PIP4K2A,TBC1D25,OPTN,MTMR3,SCFD1,ATP6V0B,USP36,C9orf72,IKBKG
GO:0000302	response to reactive oxygen species	32	189	0.27	0.0257	9606.ENSP00000212015,9606.ENSP00000216117,9606.ENSP00000224140,9606.ENSP00000225174,9606.ENSP00000239223,9606.ENSP00000254846,9606.ENSP00000262746,9606.ENSP00000272233,9606.ENSP00000281092,9606.ENSP00000300574,9606.ENSP00000306245,9606.ENSP00000310170,9606.ENSP00000312455,9606.ENSP00000347134,9606.ENSP00000356156,9606.ENSP00000356410,9606.ENSP00000359424,9606.ENSP00000360266,9606.ENSP00000361275,…	SIRT1,HMOX1,SETX,PPIF,DUSP1,KDM6B,PRDX1,RHOB,FER,CRK,FOS,FOSL1,CFLAR,NET1,PPP1R15B,GLRX2,CHUK,JUN,PLK3,ADPRHL2,BAK1,KLF4,EDN1,ETS1,NFE2L2,RELA,TRA2B,CSB-PGBD3,CRYAB,TXNRD1,TNFAIP3,NR4A3
GO:0030162	regulation of proteolysis	94	742	0.15	0.026	9606.ENSP00000157812,9606.ENSP00000158771,9606.ENSP00000171111,9606.ENSP00000185150,9606.ENSP00000212015,9606.ENSP00000216037,9606.ENSP00000220751,9606.ENSP00000223095,9606.ENSP00000229416,9606.ENSP00000250457,9606.ENSP00000251849,9606.ENSP00000257787,9606.ENSP00000259808,9606.ENSP00000260130,9606.ENSP00000260356,9606.ENSP00000260442,9606.ENSP00000262384,9606.ENSP00000263464,9606.ENSP00000264198,…	PSMC4,DERL2,KEAP1,ERLEC1,SIRT1,XBP1,RIPK2,SERPINE1,GCLC,EGLN3,RAF1,AKIRIN2,RIPK1,SDCBP,THBS1,BCL2L10,N4BP1,BIRC3,MUL1,LEF1,PLK2,TNFRSF10B,BTBD11,FBXW7,SH3RF1,NSMCE2,PPARG,PCOLCE2,FADD,RNF139,EIF2AK3,TNFRSF10D,TRIB1,CFLAR,DAB2,KLHL11,ZFAND2A,CLU,TLK2,RCHY1,SIAH2,KARS,PMAIP1,YOD1,CLN8,SMAD3,CAV1,PLAUR,SFN,NRD1,WAC,ARIH2,VCP,DDA1,SMURF1,LRIG2,CTGF,EFNA1,ECM1,BTRC,BCL10,LONRF3,PLK3,ZC3H12A,RNF19B,MTC…
GO:1903706	regulation of hemopoiesis	58	412	0.19	0.0268	9606.ENSP00000166139,9606.ENSP00000216037,9606.ENSP00000216797,9606.ENSP00000220751,9606.ENSP00000245414,9606.ENSP00000245817,9606.ENSP00000249075,9606.ENSP00000254066,9606.ENSP00000254810,9606.ENSP00000254958,9606.ENSP00000259808,9606.ENSP00000260356,9606.ENSP00000262710,9606.ENSP00000265165,9606.ENSP00000281708,9606.ENSP00000284273,9606.ENSP00000284637,9606.ENSP00000285071,9606.ENSP00000285379,…	FSTL3,XBP1,NFKBIA,RIPK2,IRF1,TNFSF9,LIF,RARA,H3F3B,JAG1,RIPK1,THBS1,ACIN1,LEF1,FBXW7,UBASH3B,SH3RF1,FLCN,CA2,STAT5B,MITF,RUNX1,FADD,IL12A,CEBPB,FOS,TRIB1,TFE3,EGR3,MALT1,NFKBIZ,CSF1,RNF41,NRARP,ARNT,ZEB1,CTR9,DUSP10,PRDM1,RBM15,JUN,ZC3H12A,AGO3,HSPA1B,CD83,ETS1,IL4R,NFE2L2,BCL6,FOXO3,CREB1,CYLD,FNIP1,TRAF6,CNOT4,ZFP36,ITCH,NR4A3
GO:0043409	negative regulation of MAPK cascade	28	158	0.29	0.0275	9606.ENSP00000216037,9606.ENSP00000235382,9606.ENSP00000239223,9606.ENSP00000249075,9606.ENSP00000283228,9606.ENSP00000285071,9606.ENSP00000287936,9606.ENSP00000288943,9606.ENSP00000296677,9606.ENSP00000298573,9606.ENSP00000314420,9606.ENSP00000318687,9606.ENSP00000339191,9606.ENSP00000344352,9606.ENSP00000355866,9606.ENSP00000357392,9606.ENSP00000358140,9606.ENSP00000358596,9606.ENSP00000360683,…	XBP1,RGS2,DUSP1,LIF,PTPRR,FLCN,HMGCR,DUSP2,F2RL1,DUSP16,PER1,HSPH1,CAV1,ATF3,DUSP10,EFNA1,EIF3A,DUSP5,PTPN1,KLF4,SPRY2,ERRFI1,GPS2,DUSP8,PPP2CA,CNKSR3,DUSP14,ITCH
GO:0098781	ncRNA transcription	19	90	0.37	0.0279	9606.ENSP00000216294,9606.ENSP00000237853,9606.ENSP00000262809,9606.ENSP00000264157,9606.ENSP00000272645,9606.ENSP00000283875,9606.ENSP00000285814,9606.ENSP00000296564,9606.ENSP00000310260,9606.ENSP00000349541,9606.ENSP00000370201,9606.ENSP00000375942,9606.ENSP00000379847,9606.ENSP00000403683,9606.ENSP00000415433,9606.ENSP00000431603,9606.ENSP00000434466,9606.ENSP00000476948,9606.ENSP00000480421	SNAPC1,ELL2,ELL,CCNT2,POLR2D,GTF2E1,NIFK,ICE1,INTS6,PTRF,TAF9,TBP,ZNF143,NABP1,INTS12,POU2F2,INTS4,RPAP2,SRRT
GO:0006903	vesicle targeting	18	83	0.38	0.0283	9606.ENSP00000009041,9606.ENSP00000222547,9606.ENSP00000223369,9606.ENSP00000260643,9606.ENSP00000262139,9606.ENSP00000262225,9606.ENSP00000280551,9606.ENSP00000291574,9606.ENSP00000294179,9606.ENSP00000295400,9606.ENSP00000325827,9606.ENSP00000330945,9606.ENSP00000346139,9606.ENSP00000358071,9606.ENSP00000378721,9606.ENSP00000381823,9606.ENSP00000390783,9606.ENSP00000444850	STARD3NL,BET1,YKT6,PREB,WIPI1,TMED2,SEC24D,TRAPPC10,STX5,TGFA,SEC16A,TMED9,TBC1D20,SEC23IP,SEC31A,SEC24A,SCFD1,USO1
GO:1905898	positive regulation of response to endoplasmic reticulum stress	11	37	0.52	0.0293	9606.ENSP00000200453,9606.ENSP00000212015,9606.ENSP00000216037,9606.ENSP00000326119,9606.ENSP00000339191,9606.ENSP00000360683,9606.ENSP00000363591,9606.ENSP00000380252,9606.ENSP00000409555,9606.ENSP00000417273,9606.ENSP00000448665	PPP1R15A,SIRT1,XBP1,PMAIP1,CAV1,PTPN1,BAK1,NFE2L2,HERPUD1,NCK1,DDIT3
GO:0030307	positive regulation of cell growth	28	159	0.29	0.0295	9606.ENSP00000158771,9606.ENSP00000230990,9606.ENSP00000254810,9606.ENSP00000260130,9606.ENSP00000261918,9606.ENSP00000262198,9606.ENSP00000263980,9606.ENSP00000264198,9606.ENSP00000265165,9606.ENSP00000265354,9606.ENSP00000265371,9606.ENSP00000278568,9606.ENSP00000300574,9606.ENSP00000306328,9606.ENSP00000309968,9606.ENSP00000326737,9606.ENSP00000333982,9606.ENSP00000340989,9606.ENSP00000349305,…	DERL2,HBEGF,H3F3B,SDCBP,SEMA7A,ADNP2,SLC9A1,MUL1,LEF1,SRF,NRP1,PAK1,CRK,SLC25A33,ADAM17,TNFRSF12A,NDEL1,SFN,GOLGA4,SUPV3L1,SMURF1,INO80,EDN1,CDKL5,TAF9,NEDD4L,CDKN2AIP,RPS6KA1
GO:0031398	positive regulation of protein ubiquitination	22	113	0.33	0.0303	9606.ENSP00000220751,9606.ENSP00000248244,9606.ENSP00000260247,9606.ENSP00000263464,9606.ENSP00000265138,9606.ENSP00000268042,9606.ENSP00000281708,9606.ENSP00000296257,9606.ENSP00000319279,9606.ENSP00000319482,9606.ENSP00000321239,9606.ENSP00000324173,9606.ENSP00000339191,9606.ENSP00000349547,9606.ENSP00000351789,9606.ENSP00000353735,9606.ENSP00000355013,9606.ENSP00000359612,9606.ENSP00000417706,…	RIPK2,TICAM1,DCUN1D5,BIRC3,ARRDC3,ARRDC4,FBXW7,SENP2,MALT1,DCUN1D3,RCHY1,HSPA5,CAV1,RASSF1,PELI1,TOPORS,CTR9,BCL10,DCUN1D2,TRAF6,RNF111,BIRC2
GO:0032436	positive regulation of proteasomal ubiquitin-dependent protein catabolic process	19	91	0.36	0.0306	9606.ENSP00000171111,9606.ENSP00000216037,9606.ENSP00000229416,9606.ENSP00000274289,9606.ENSP00000287437,9606.ENSP00000312150,9606.ENSP00000313391,9606.ENSP00000314619,9606.ENSP00000315130,9606.ENSP00000321239,9606.ENSP00000339191,9606.ENSP00000348769,9606.ENSP00000351777,9606.ENSP00000360690,9606.ENSP00000361275,9606.ENSP00000362555,9606.ENSP00000380252,9606.ENSP00000381298,9606.ENSP00000409555	KEAP1,XBP1,GCLC,PLK2,NSMCE2,TRIB1,DAB2,ZFAND2A,CLU,RCHY1,CAV1,ARIH2,VCP,LONRF3,PLK3,RNF19B,NFE2L2,LONRF1,HERPUD1
GO:0002697	regulation of immune effector process	52	362	0.2	0.0307	9606.ENSP00000216037,9606.ENSP00000216117,9606.ENSP00000220751,9606.ENSP00000234420,9606.ENSP00000252229,9606.ENSP00000254066,9606.ENSP00000261918,9606.ENSP00000263202,9606.ENSP00000263464,9606.ENSP00000264198,9606.ENSP00000281092,9606.ENSP00000293328,9606.ENSP00000296677,9606.ENSP00000300574,9606.ENSP00000301838,9606.ENSP00000303231,9606.ENSP00000304501,9606.ENSP00000309338,9606.ENSP00000315130,…	XBP1,HMOX1,RIPK2,MSH6,MICB,RARA,SEMA7A,UFD1L,BIRC3,MUL1,FER,STAT5B,F2RL1,CRK,FADD,IL12A,ADORA2B,CLCF1,CLU,SUPT6H,MALT1,KARS,NFKBIZ,IFNLR1,NPLOC4,RIOK3,CREB3,TRIM38,ANKRD17,GPATCH3,DUSP10,BCL10,ZC3H12A,PTAFR,HLA-E,DDX58,SERPINB9,RSAD2,SEC14L1,AP1G1,IL4R,BCL6,EXOSC6,PVR,MICA,FAM49B,TRAF6,TRAF3,BIRC2,ITCH,TNFAIP3,NR4A3
GO:0043434	response to peptide hormone	52	362	0.2	0.0307	9606.ENSP00000209728,9606.ENSP00000212015,9606.ENSP00000216037,9606.ENSP00000226574,9606.ENSP00000228872,9606.ENSP00000229416,9606.ENSP00000239938,9606.ENSP00000242480,9606.ENSP00000244869,9606.ENSP00000245787,9606.ENSP00000252818,9606.ENSP00000253063,9606.ENSP00000256015,9606.ENSP00000263980,9606.ENSP00000264832,9606.ENSP00000265643,9606.ENSP00000266126,9606.ENSP00000278568,9606.ENSP00000281092,…	CDC6,SIRT1,XBP1,NFKB1,CDKN1B,GCLC,EGR1,EGR2,EREG,INSIG2,JUND,SESN2,BTG1,SLC9A1,ICAM1,GAL,EIF2B2,PAK1,FER,QDPR,CA2,PPARG,BTG2,STAT5B,TSC1,CRK,SLC25A33,YWHAG,CFLAR,NDEL1,CAV1,NR4A2,ENPP1,CTGF,ABCC2,SORBS1,PTPN1,ERRFI1,EDN1,NFE2L2,VIMP,GRB10,RELA,CREB1,LPIN1,PNPT1,ATP6V0B,ADM,NR4A1,CPEB2,TRIM16,NR4A3
GO:0042493	response to drug	110	900	0.13	0.0309	9606.ENSP00000212015,9606.ENSP00000215904,9606.ENSP00000216117,9606.ENSP00000216797,9606.ENSP00000220751,9606.ENSP00000224140,9606.ENSP00000225174,9606.ENSP00000226574,9606.ENSP00000228872,9606.ENSP00000229416,9606.ENSP00000232607,9606.ENSP00000234256,9606.ENSP00000235382,9606.ENSP00000236137,9606.ENSP00000237612,9606.ENSP00000239223,9606.ENSP00000239938,9606.ENSP00000240874,9606.ENSP00000245919,…	SIRT1,PDXP,HMOX1,NFKBIA,RIPK2,SETX,PPIF,NFKB1,CDKN1B,GCLC,UMPS,SLC1A4,RGS2,SLC19A2,ABCG2,DUSP1,EGR1,KALRN,FOSB,JUND,RARA,KDM6B,JAG1,SLC19A3,THBS1,ICAM1,GAL,CHKA,PMS2,NPC1,RHOB,NFKBIE,SLC22A3,PLIN2,SLC7A11,QDPR,SLC25A4,CA2,CA3,PPARG,HMGCR,SLC25A32,HSP90B1,CRK,FADD,JUNB,LRP8,PRKCE,FOS,UQCRFS1,DDIT4,ADAM17,FOSL1,CFLAR,SSH1,DVL3,SLC36A4,CALR,HMGCS1,ENO3,HSPA5,PPP2R2A,SLC25A42,PDGFB,PDE4B,HOMER1,ZNF35…
GO:0016072	rRNA metabolic process	35	217	0.25	0.0318	9606.ENSP00000199320,9606.ENSP00000212015,9606.ENSP00000230340,9606.ENSP00000244230,9606.ENSP00000254605,9606.ENSP00000261708,9606.ENSP00000274311,9606.ENSP00000283109,9606.ENSP00000285814,9606.ENSP00000296792,9606.ENSP00000297990,9606.ENSP00000301364,9606.ENSP00000306565,9606.ENSP00000308179,9606.ENSP00000308332,9606.ENSP00000314193,9606.ENSP00000322396,9606.ENSP00000323288,9606.ENSP00000323424,…	DIMT1,SIRT1,BYSL,MPHOSPH10,RRP8,UTP6,PELO,RIOK2,NIFK,UTP15,NOL6,TSR1,ISG20,WDR3,UTP23,WDR75,RRS1,RPUSD2,ISG20L2,CIRH1A,RIOK3,PTRF,WDR37,WDR55,MDN1,PDCD11,TEX10,RIOK1,NOP2,UTP14A,WDR43,CHD7,EXOSC6,NOL8,DEDD2
GO:0002756	MyD88-independent toll-like receptor signaling pathway	9	26	0.58	0.0323	9606.ENSP00000248244,9606.ENSP00000259808,9606.ENSP00000301838,9606.ENSP00000306124,9606.ENSP00000359424,9606.ENSP00000389600,9606.ENSP00000441543,9606.ENSP00000454207,9606.ENSP00000483825	TICAM1,RIPK1,FADD,PRKCE,CHUK,TLR6,UBC,TRAF3,IKBKG
GO:0060546	negative regulation of necroptotic process	6	11	0.78	0.0328	9606.ENSP00000263464,9606.ENSP00000281456,9606.ENSP00000301838,9606.ENSP00000312455,9606.ENSP00000339191,9606.ENSP00000477613	BIRC3,SLC25A4,FADD,CFLAR,CAV1,BIRC2
GO:1902041	regulation of extrinsic apoptotic signaling pathway via death domain receptors	14	57	0.44	0.0333	9606.ENSP00000216117,9606.ENSP00000223095,9606.ENSP00000251849,9606.ENSP00000259808,9606.ENSP00000260356,9606.ENSP00000264832,9606.ENSP00000276431,9606.ENSP00000301838,9606.ENSP00000312455,9606.ENSP00000326119,9606.ENSP00000344352,9606.ENSP00000357055,9606.ENSP00000415243,9606.ENSP00000481570	HMOX1,SERPINE1,RAF1,RIPK1,THBS1,ICAM1,TNFRSF10B,FADD,CFLAR,PMAIP1,ATF3,PEA15,SKIL,TNFAIP3
GO:0046328	regulation of JNK cascade	29	169	0.28	0.0337	9606.ENSP00000013125,9606.ENSP00000056217,9606.ENSP00000215631,9606.ENSP00000220751,9606.ENSP00000259808,9606.ENSP00000260130,9606.ENSP00000262013,9606.ENSP00000264198,9606.ENSP00000278568,9606.ENSP00000284637,9606.ENSP00000294312,9606.ENSP00000296677,9606.ENSP00000310042,9606.ENSP00000314420,9606.ENSP00000316054,9606.ENSP00000355866,9606.ENSP00000356954,9606.ENSP00000360025,9606.ENSP00000360683,…	MAP4K5,ARHGEF5,GADD45B,RIPK2,RIPK1,SDCBP,SPAG9,MUL1,PAK1,SH3RF1,FGF19,F2RL1,ZNF622,PER1,DVL3,DUSP10,CTGF,GADD45A,PTPN1,DKK1,DAXX,EDN1,GPS2,TLR6,MAP2K4,CSB-PGBD3,TRAF6,MAP3K9,ITCH
GO:0006919	activation of cysteine-type endopeptidase activity involved in apoptotic process	18	85	0.37	0.0342	9606.ENSP00000250457,9606.ENSP00000259808,9606.ENSP00000260442,9606.ENSP00000264198,9606.ENSP00000276431,9606.ENSP00000287820,9606.ENSP00000301838,9606.ENSP00000307235,9606.ENSP00000326119,9606.ENSP00000332973,9606.ENSP00000351777,9606.ENSP00000362730,9606.ENSP00000363591,9606.ENSP00000368727,9606.ENSP00000370253,9606.ENSP00000378364,9606.ENSP00000398495,9606.ENSP00000480836	EGLN3,RIPK1,BCL2L10,MUL1,TNFRSF10B,PPARG,FADD,EIF2AK3,PMAIP1,SMAD3,VCP,MTCH1,BAK1,XDH,NKX3-1,SLC11A2,DIABLO,BCL2L13
GO:0051345	positive regulation of hydrolase activity	93	742	0.14	0.0347	9606.ENSP00000033079,9606.ENSP00000056217,9606.ENSP00000200453,9606.ENSP00000212015,9606.ENSP00000220751,9606.ENSP00000221086,9606.ENSP00000234420,9606.ENSP00000235382,9606.ENSP00000240874,9606.ENSP00000250457,9606.ENSP00000254322,9606.ENSP00000257787,9606.ENSP00000259808,9606.ENSP00000260442,9606.ENSP00000260526,9606.ENSP00000260643,9606.ENSP00000263245,9606.ENSP00000264198,9606.ENSP00000264276,…	FAM13B,ARHGEF5,PPP1R15A,SIRT1,RIPK2,MTMR9,MSH6,RGS2,KALRN,EGLN3,DNAJB1,AKIRIN2,RIPK1,BCL2L10,ARHGAP29,PREB,ARFGAP3,MUL1,ALS2,RASGEF1B,RAPGEF2,ICAM1,NRP1,TNFRSF10B,PPARG,ARHGAP17,CDC42EP3,PCOLCE2,F2RL1,TSC1,ARHGAP42,FADD,ARAP2,FNTA,EIF2AK3,CFLAR,DNAJA2,ARFGAP1,DVL3,KARS,PMAIP1,SMAD3,NDEL1,ARHGAP10,STARD13,CAV1,CREB3,ARHGAP12,TBC1D20,NET1,TBC1D8B,EPHA2,VCP,MTCL1,SIPA1L2,RGS16,RASAL2,CTGF,F11R,EFNA1…
GO:0071901	negative regulation of protein serine/threonine kinase activity	24	130	0.31	0.0347	9606.ENSP00000212015,9606.ENSP00000228872,9606.ENSP00000235382,9606.ENSP00000239223,9606.ENSP00000276925,9606.ENSP00000287878,9606.ENSP00000287936,9606.ENSP00000288943,9606.ENSP00000298573,9606.ENSP00000306330,9606.ENSP00000339191,9606.ENSP00000340989,9606.ENSP00000355866,9606.ENSP00000358596,9606.ENSP00000360683,9606.ENSP00000366306,9606.ENSP00000370104,9606.ENSP00000372035,9606.ENSP00000380530,…	SIRT1,CDKN1B,RGS2,DUSP1,CDKN2B,PRKAG2,HMGCR,DUSP2,DUSP16,YWHAG,CAV1,SFN,DUSP10,DUSP5,PTPN1,SPRY2,GPS2,LATS2,DUSP8,CDKN1A,PPP2CA,DUSP14,PKIB,TNFAIP3
GO:0043507	positive regulation of JUN kinase activity	16	71	0.4	0.0347	9606.ENSP00000013125,9606.ENSP00000056217,9606.ENSP00000259808,9606.ENSP00000262013,9606.ENSP00000264198,9606.ENSP00000278568,9606.ENSP00000316054,9606.ENSP00000360683,9606.ENSP00000363081,9606.ENSP00000363668,9606.ENSP00000368683,9606.ENSP00000389600,9606.ENSP00000410402,9606.ENSP00000423550,9606.ENSP00000433623,9606.ENSP00000451263	MAP4K5,ARHGEF5,RIPK1,SPAG9,MUL1,PAK1,DVL3,PTPN1,DKK1,DAXX,EDN1,TLR6,MAP2K4,CSB-PGBD3,TRAF6,MAP3K9
GO:0039531	regulation of viral-induced cytoplasmic pattern recognition receptor signaling pathway	8	21	0.63	0.0348	9606.ENSP00000263202,9606.ENSP00000263464,9606.ENSP00000331487,9606.ENSP00000341874,9606.ENSP00000351416,9606.ENSP00000354645,9606.ENSP00000376268,9606.ENSP00000477613	UFD1L,BIRC3,NPLOC4,RIOK3,ANKRD17,GPATCH3,SEC14L1,BIRC2
GO:0010035	response to inorganic substance	66	491	0.17	0.0349	9606.ENSP00000166139,9606.ENSP00000179259,9606.ENSP00000212015,9606.ENSP00000216117,9606.ENSP00000224140,9606.ENSP00000225174,9606.ENSP00000228872,9606.ENSP00000229416,9606.ENSP00000239223,9606.ENSP00000245919,9606.ENSP00000252818,9606.ENSP00000254846,9606.ENSP00000256383,9606.ENSP00000260356,9606.ENSP00000262746,9606.ENSP00000263339,9606.ENSP00000264832,9606.ENSP00000269228,9606.ENSP00000272233,…	FSTL3,C12orf5,SIRT1,HMOX1,SETX,PPIF,CDKN1B,GCLC,DUSP1,FOSB,JUND,KDM6B,EIF2S1,THBS1,PRDX1,IL1A,ICAM1,NPC1,RHOB,QDPR,CA2,BRAF,AQP3,CRK,JUNB,FOS,EIF2AK3,FOSL1,CFLAR,CALR,HMGCS1,HSPA5,HOMER1,CAV1,NET1,P2RX4,SLC41A1,PPP1R15B,GLRX2,SLC30A7,CHUK,ABCC2,JUN,MTF1,ZC3H12A,ADPRHL2,BAK1,DAXX,KLF4,EDN1,ETS1,SLC11A2,SEC31A,SLC30A5,NFE2L2,NEDD4L,RELA,CREB1,SLC25A13,ALG2,PPP2CA,CSB-PGBD3,CRYAB,TXNRD1,TNFAIP3,NR4A3
GO:1902105	regulation of leukocyte differentiation	40	261	0.23	0.0352	9606.ENSP00000166139,9606.ENSP00000216037,9606.ENSP00000220751,9606.ENSP00000245414,9606.ENSP00000245817,9606.ENSP00000249075,9606.ENSP00000254066,9606.ENSP00000259808,9606.ENSP00000262710,9606.ENSP00000265165,9606.ENSP00000281708,9606.ENSP00000284273,9606.ENSP00000284637,9606.ENSP00000285379,9606.ENSP00000293328,9606.ENSP00000295600,9606.ENSP00000300305,9606.ENSP00000301838,9606.ENSP00000303231,…	FSTL3,XBP1,RIPK2,IRF1,TNFSF9,LIF,RARA,RIPK1,ACIN1,LEF1,FBXW7,UBASH3B,SH3RF1,CA2,STAT5B,MITF,RUNX1,FADD,IL12A,CEBPB,FOS,TRIB1,TFE3,EGR3,MALT1,NFKBIZ,CSF1,RNF41,NRARP,ZEB1,DUSP10,PRDM1,JUN,ZC3H12A,CD83,IL4R,BCL6,CREB1,CYLD,TRAF6
GO:0044419	interspecies interaction between organisms	91	724	0.14	0.0355	9606.ENSP00000212015,9606.ENSP00000216797,9606.ENSP00000217402,9606.ENSP00000220509,9606.ENSP00000227520,9606.ENSP00000232496,9606.ENSP00000234420,9606.ENSP00000248248,9606.ENSP00000252229,9606.ENSP00000259808,9606.ENSP00000263377,9606.ENSP00000264157,9606.ENSP00000264832,9606.ENSP00000265165,9606.ENSP00000267202,9606.ENSP00000268184,9606.ENSP00000269228,9606.ENSP00000273047,9606.ENSP00000273130,…	SIRT1,NFKBIA,CHMP4B,VPS18,CCDC86,TUSC2,MSH6,MON1B,MICB,RIPK1,BRD4,CCNT2,ICAM1,LEF1,VPS37B,CRTC3,NPC1,RAB5A,DYNC1LI1,SLC25A4,FBXW7,GTF2E1,ITGA5,CXCL3,UBAP1,KCTD5,FADD,CXCL8,CFLAR,NUP98,VPS37A,SUPT6H,MMP1,KARS,KPNA7,SMAD3,CAV1,SLC20A2,CREB3,NUP50,TBC1D20,TAP1,UVRAG,EPHA2,ANKRD17,VCP,NUP214,RAET1L,F11R,CRTC2,EIF3A,RBM15,BTRC,JUN,ZC3H12A,DAXX,UBR4,HSPA1B,NMT2,NFX1,DDX58,TRIM5,SERPINB9,GPS2,ITSN1,RSAD…
GO:0071243	cellular response to arsenic-containing substance	7	16	0.69	0.0355	9606.ENSP00000216117,9606.ENSP00000225174,9606.ENSP00000314619,9606.ENSP00000344352,9606.ENSP00000362179,9606.ENSP00000363668,9606.ENSP00000443985	HMOX1,PPIF,ZFAND2A,ATF3,ZC3H12A,DAXX,CPEB2
GO:0042108	positive regulation of cytokine biosynthetic process	14	58	0.43	0.0372	9606.ENSP00000164227,9606.ENSP00000216117,9606.ENSP00000239938,9606.ENSP00000244869,9606.ENSP00000245414,9606.ENSP00000248244,9606.ENSP00000260356,9606.ENSP00000263339,9606.ENSP00000293328,9606.ENSP00000359612,9606.ENSP00000362965,9606.ENSP00000384273,9606.ENSP00000389600,9606.ENSP00000433623	BCL3,HMOX1,EGR1,EREG,IRF1,TICAM1,THBS1,IL1A,STAT5B,BCL10,PTAFR,RELA,TLR6,TRAF6
GO:0070988	demethylation	14	58	0.43	0.0372	9606.ENSP00000216489,9606.ENSP00000222982,9606.ENSP00000254846,9606.ENSP00000350676,9606.ENSP00000356234,9606.ENSP00000367203,9606.ENSP00000370710,9606.ENSP00000376611,9606.ENSP00000382204,9606.ENSP00000382688,9606.ENSP00000386660,9606.ENSP00000394085,9606.ENSP00000432786,9606.ENSP00000442788	ALKBH1,CYP3A5,KDM6B,PHF8,KDM5B,KDM6A,JMJD2C,TDG,JMJD1C,KDM5A,KDM3A,JMJD6,KDM2A,TET2
GO:1903364	positive regulation of cellular protein catabolic process	26	147	0.29	0.038	9606.ENSP00000157812,9606.ENSP00000171111,9606.ENSP00000216037,9606.ENSP00000229416,9606.ENSP00000274289,9606.ENSP00000281708,9606.ENSP00000287437,9606.ENSP00000304051,9606.ENSP00000312150,9606.ENSP00000313391,9606.ENSP00000314619,9606.ENSP00000315130,9606.ENSP00000321239,9606.ENSP00000339191,9606.ENSP00000348769,9606.ENSP00000351777,9606.ENSP00000354621,9606.ENSP00000360690,9606.ENSP00000361275,…	PSMC4,KEAP1,XBP1,GCLC,PLK2,FBXW7,NSMCE2,RNF139,TRIB1,DAB2,ZFAND2A,CLU,RCHY1,CAV1,ARIH2,VCP,SMURF1,LONRF3,PLK3,RNF19B,NFE2L2,LONRF1,RDX,HERPUD1,LDLR,TNFAIP3
GO:0006901	vesicle coating	15	65	0.41	0.038	9606.ENSP00000222547,9606.ENSP00000260643,9606.ENSP00000262225,9606.ENSP00000280551,9606.ENSP00000291574,9606.ENSP00000294179,9606.ENSP00000295400,9606.ENSP00000325827,9606.ENSP00000330945,9606.ENSP00000346139,9606.ENSP00000358071,9606.ENSP00000378721,9606.ENSP00000381823,9606.ENSP00000390783,9606.ENSP00000444850	BET1,PREB,TMED2,SEC24D,TRAPPC10,STX5,TGFA,SEC16A,TMED9,TBC1D20,SEC23IP,SEC31A,SEC24A,SCFD1,USO1
GO:0030433	ubiquitin-dependent ERAD pathway	15	65	0.41	0.038	9606.ENSP00000157812,9606.ENSP00000158771,9606.ENSP00000185150,9606.ENSP00000237455,9606.ENSP00000249356,9606.ENSP00000259335,9606.ENSP00000261942,9606.ENSP00000299767,9606.ENSP00000324173,9606.ENSP00000326813,9606.ENSP00000331487,9606.ENSP00000351777,9606.ENSP00000366395,9606.ENSP00000381282,9606.ENSP00000383719	PSMC4,DERL2,ERLEC1,RNF103,DNAJB9,KIAA0368,FAF2,HSP90B1,HSPA5,YOD1,NPLOC4,VCP,SYVN1,VIMP,UBE2J2
GO:0070076	histone lysine demethylation	9	27	0.57	0.0381	9606.ENSP00000254846,9606.ENSP00000350676,9606.ENSP00000356234,9606.ENSP00000367203,9606.ENSP00000370710,9606.ENSP00000382204,9606.ENSP00000382688,9606.ENSP00000386660,9606.ENSP00000432786	KDM6B,PHF8,KDM5B,KDM6A,JMJD2C,JMJD1C,KDM5A,KDM3A,KDM2A
GO:1900101	regulation of endoplasmic reticulum unfolded protein response	9	27	0.57	0.0381	9606.ENSP00000200453,9606.ENSP00000216037,9606.ENSP00000249356,9606.ENSP00000324173,9606.ENSP00000356156,9606.ENSP00000360683,9606.ENSP00000363591,9606.ENSP00000417273,9606.ENSP00000446479	PPP1R15A,XBP1,DNAJB9,HSPA5,PPP1R15B,PTPN1,BAK1,NCK1,FICD
GO:0051704	multi-organism process	270	2514	0.08	0.0383	9606.ENSP00000064780,9606.ENSP00000158771,9606.ENSP00000164227,9606.ENSP00000166139,9606.ENSP00000204726,9606.ENSP00000212015,9606.ENSP00000216037,9606.ENSP00000216797,9606.ENSP00000217402,9606.ENSP00000220509,9606.ENSP00000220751,9606.ENSP00000221452,9606.ENSP00000222553,9606.ENSP00000223095,9606.ENSP00000224140,9606.ENSP00000226574,9606.ENSP00000227520,9606.ENSP00000227752,9606.ENSP00000228606,…	RELT,DERL2,BCL3,FSTL3,GOLGA3,SIRT1,XBP1,NFKBIA,CHMP4B,VPS18,RIPK2,RELB,NAMPT,SERPINE1,SETX,NFKB1,CCDC86,IL10RA,CYP27B1,CLEC4A,BYSL,TUSC2,UMPS,ODC1,MSH6,RGS2,TBPL1,EGR1,KALRN,EREG,IRF1,FOSB,TICAM1,MON1B,LIF,MICB,JUND,RARA,H3F3B,BTG1,IRAK2,OASL,AKIRIN2,RIPK1,BCL2L10,TMED2,NLRC5,PRDX1,BRD4,BIRC3,ACVR1,CCNT2,ARID4B,PPAP2A,ICAM1,SOX30,LEF1,CREM,VPS37B,CRTC3,TAF4B,NPC1,AKAP8,RAB5A,DYNC1LI1,TNFRSF10B,CC…
GO:0051716	cellular response to stimulus	619	6212	0.04	0.0384	9606.ENSP00000013125,9606.ENSP00000014914,9606.ENSP00000033079,9606.ENSP00000056217,9606.ENSP00000064780,9606.ENSP00000157812,9606.ENSP00000158771,9606.ENSP00000164024,9606.ENSP00000164227,9606.ENSP00000166139,9606.ENSP00000171111,9606.ENSP00000179259,9606.ENSP00000185150,9606.ENSP00000200453,9606.ENSP00000202556,9606.ENSP00000209728,9606.ENSP00000212015,9606.ENSP00000215904,9606.ENSP00000216037,…	MAP4K5,GPRC5A,FAM13B,ARHGEF5,RELT,PSMC4,DERL2,CELSR3,BCL3,FSTL3,KEAP1,C12orf5,ERLEC1,PPP1R15A,PPP1R13B,CDC6,SIRT1,PDXP,XBP1,RHBDD3,HMOX1,SOS2,ALKBH1,NFKBIA,EHD4,RHOV,BRF2,RIPK2,GSR,RELB,NAMPT,FKBP14,STX1A,CYP3A5,SERPINE1,SETX,PPIF,RASD1,AKAP10,NFKB1,ZPR1,IL10RA,PRDM4,CDKN1B,CLEC4A,GCLC,GUCA1B,HBEGF,UMPS,MSH6,RNF103,ZFAND5,DUSP1,EGR1,KALRN,EGR2,SNAI1,EREG,IRF1,INSIG2,TNFSF9,FOSB,PITHD1,WNK4,TICAM1…
GO:0061041	regulation of wound healing	23	124	0.31	0.0389	9606.ENSP00000216037,9606.ENSP00000223095,9606.ENSP00000230990,9606.ENSP00000260356,9606.ENSP00000284273,9606.ENSP00000287936,9606.ENSP00000296677,9606.ENSP00000300574,9606.ENSP00000306124,9606.ENSP00000326737,9606.ENSP00000330382,9606.ENSP00000332973,9606.ENSP00000339191,9606.ENSP00000339328,9606.ENSP00000346508,9606.ENSP00000355866,9606.ENSP00000360296,9606.ENSP00000361850,9606.ENSP00000368683,…	XBP1,SERPINE1,HBEGF,THBS1,UBASH3B,HMGCR,F2RL1,CRK,PRKCE,TNFRSF12A,PDGFB,SMAD3,CAV1,PLAUR,PDGFA,DUSP10,PPAP2B,PLAU,EDN1,TEC,NFE2L2,PHLDB2,TNFAIP3
GO:1901652	response to peptide	59	431	0.18	0.0396	9606.ENSP00000209728,9606.ENSP00000212015,9606.ENSP00000216037,9606.ENSP00000216797,9606.ENSP00000220751,9606.ENSP00000226574,9606.ENSP00000228872,9606.ENSP00000229416,9606.ENSP00000239938,9606.ENSP00000242480,9606.ENSP00000244869,9606.ENSP00000245787,9606.ENSP00000252818,9606.ENSP00000253063,9606.ENSP00000254958,9606.ENSP00000256015,9606.ENSP00000263980,9606.ENSP00000264832,9606.ENSP00000265643,…	CDC6,SIRT1,XBP1,NFKBIA,RIPK2,NFKB1,CDKN1B,GCLC,EGR1,EGR2,EREG,INSIG2,JUND,SESN2,JAG1,BTG1,SLC9A1,ICAM1,GAL,EIF2B2,PAK1,FER,QDPR,CA2,PPARG,BTG2,STAT5B,TSC1,CRK,SLC25A33,YWHAG,CFLAR,NDEL1,CAV1,NR4A2,ENPP1,CTGF,ABCC2,SORBS1,PTPN1,KLF4,ERRFI1,EDN1,NFE2L2,VIMP,GRB10,RELA,FOXO3,CREB1,TLR6,LPIN1,PNPT1,ATP6V0B,ADM,NR4A1,CPEB2,TRIM16,TNFAIP3,NR4A3
GO:1903311	regulation of mRNA metabolic process	37	238	0.24	0.0396	9606.ENSP00000252542,9606.ENSP00000258770,9606.ENSP00000262710,9606.ENSP00000267287,9606.ENSP00000280614,9606.ENSP00000290551,9606.ENSP00000297591,9606.ENSP00000309142,9606.ENSP00000316032,9606.ENSP00000319104,9606.ENSP00000331907,9606.ENSP00000339245,9606.ENSP00000345412,9606.ENSP00000351141,9606.ENSP00000352400,9606.ENSP00000355013,9606.ENSP00000358458,9606.ENSP00000358799,9606.ENSP00000362179,…	SAFB2,TBRG4,ACIN1,MBNL2,CCRN4L,BTG2,KIAA1429,PDE12,NUP98,SUPT6H,DHX34,YTHDC1,CPSF7,WTAP,NUP214,CTR9,FAM46C,RBM15,ZC3H12A,SRSF3,PRR5L,SLTM,IGF2BP2,SAMD4A,SRSF2,CDK11A,GIGYF2,NANOS1,JMJD6,EXOSC6,PNPT1,TRA2B,TOB1,UBC,CDK11B,ZFP36,DCP1A
GO:0002763	positive regulation of myeloid leukocyte differentiation	13	52	0.44	0.0396	9606.ENSP00000249075,9606.ENSP00000259808,9606.ENSP00000262710,9606.ENSP00000265165,9606.ENSP00000285379,9606.ENSP00000300305,9606.ENSP00000301838,9606.ENSP00000306245,9606.ENSP00000312150,9606.ENSP00000327513,9606.ENSP00000360266,9606.ENSP00000387699,9606.ENSP00000433623	LIF,RIPK1,ACIN1,LEF1,CA2,RUNX1,FADD,FOS,TRIB1,CSF1,JUN,CREB1,TRAF6
GO:0030490	maturation of SSU-rRNA	13	52	0.44	0.0396	9606.ENSP00000230340,9606.ENSP00000244230,9606.ENSP00000261708,9606.ENSP00000283109,9606.ENSP00000301364,9606.ENSP00000308179,9606.ENSP00000308332,9606.ENSP00000322396,9606.ENSP00000327179,9606.ENSP00000341874,9606.ENSP00000358812,9606.ENSP00000369162,9606.ENSP00000377944	BYSL,MPHOSPH10,UTP6,RIOK2,TSR1,WDR3,UTP23,RRS1,CIRH1A,RIOK3,PDCD11,RIOK1,UTP14A
GO:0031348	negative regulation of defense response	30	180	0.27	0.0397	9606.ENSP00000226574,9606.ENSP00000252229,9606.ENSP00000257604,9606.ENSP00000262510,9606.ENSP00000263202,9606.ENSP00000264198,9606.ENSP00000269856,9606.ENSP00000287820,9606.ENSP00000300574,9606.ENSP00000315731,9606.ENSP00000330341,9606.ENSP00000331487,9606.ENSP00000332973,9606.ENSP00000341874,9606.ENSP00000349596,9606.ENSP00000354645,9606.ENSP00000355866,9606.ENSP00000362179,9606.ENSP00000363804,…	NFKB1,MICB,TRAFD1,NLRC5,UFD1L,MUL1,FEM1A,PPARG,CRK,METRNL,SOCS3,NPLOC4,SMAD3,RIOK3,TRIM38,GPATCH3,DUSP10,ZC3H12A,KLF4,HLA-E,SERPINB9,GPS2,SEC14L1,ETS1,VIMP,MICA,MVK,LDLR,ITCH,TNFAIP3
GO:0071396	cellular response to lipid	65	486	0.17	0.04	9606.ENSP00000216037,9606.ENSP00000216797,9606.ENSP00000220751,9606.ENSP00000223095,9606.ENSP00000224140,9606.ENSP00000226574,9606.ENSP00000248244,9606.ENSP00000251871,9606.ENSP00000254066,9606.ENSP00000256458,9606.ENSP00000262198,9606.ENSP00000264775,9606.ENSP00000264832,9606.ENSP00000265165,9606.ENSP00000269228,9606.ENSP00000269701,9606.ENSP00000287820,9606.ENSP00000303231,9606.ENSP00000303634,…	XBP1,NFKBIA,RIPK2,SERPINE1,SETX,NFKB1,TICAM1,MED17,RARA,IRAK2,ADNP2,PPAP2A,ICAM1,LEF1,NPC1,AKAP8,PPARG,IL12A,LRP8,CEBPB,PRKCE,CXCL8,DDIT4,NR1D2,CFLAR,NFKBIB,CALR,HMGCS1,PDE4B,NR4A2,INSIG1,PMEPA1,CTR9,ABCC2,ANKRD1,ZC3H12A,GJB3,PIM1,PTAFR,DAXX,KLF4,ERRFI1,EDN1,NKX3-1,ZNF35,USP8,MED13,VIMP,RELA,FOXO3,KDM3A,FHL2,CREB1,ATP2B1,NR6A1,ABL2,UBR5,TRAF6,NR4A1,LDLR,LITAF,ZFP36,EGLN2,TNFAIP3,NR4A3
GO:0071363	cellular response to growth factor stimulus	64	477	0.17	0.0401	9606.ENSP00000212015,9606.ENSP00000216037,9606.ENSP00000220325,9606.ENSP00000224140,9606.ENSP00000227322,9606.ENSP00000229416,9606.ENSP00000239938,9606.ENSP00000249749,9606.ENSP00000251849,9606.ENSP00000252809,9606.ENSP00000259808,9606.ENSP00000260356,9606.ENSP00000263640,9606.ENSP00000264431,9606.ENSP00000265165,9606.ENSP00000265371,9606.ENSP00000269209,9606.ENSP00000272645,9606.ENSP00000293328,…	SIRT1,XBP1,EHD4,SETX,ZPR1,GCLC,EGR1,DLL4,RAF1,GDF15,RIPK1,THBS1,ACVR1,RAPGEF2,LEF1,NRP1,GAREM,POLR2D,STAT5B,FGF19,CRK,FNTA,LRP8,FOS,CXCL8,DDIT4,RGMB,CFLAR,EGR3,HSPA5,PDGFB,SMAD3,CAV1,MAP2K3,SMURF1,KDM5B,CTGF,F11R,NUS1,SHOC2,GCLM,JUN,ANKRD1,KLF4,SPRY2,ERRFI1,FLRT3,BMP2,EDN1,GCNT2,FGFBP1,FAM83G,SLC33A1,USP8,RDX,KIF16B,RELA,FOXO3,CREB1,SKIL,TOB1,NR4A1,UBC,ZFP36
GO:1903034	regulation of response to wounding	26	148	0.29	0.0401	9606.ENSP00000216037,9606.ENSP00000223095,9606.ENSP00000230990,9606.ENSP00000260356,9606.ENSP00000284273,9606.ENSP00000287936,9606.ENSP00000296677,9606.ENSP00000300574,9606.ENSP00000306124,9606.ENSP00000326737,9606.ENSP00000330382,9606.ENSP00000332973,9606.ENSP00000333982,9606.ENSP00000339191,9606.ENSP00000339328,9606.ENSP00000346508,9606.ENSP00000355396,9606.ENSP00000355866,9606.ENSP00000360296,…	XBP1,SERPINE1,HBEGF,THBS1,UBASH3B,HMGCR,F2RL1,CRK,PRKCE,TNFRSF12A,PDGFB,SMAD3,NDEL1,CAV1,PLAUR,PDGFA,LRIG2,DUSP10,PPAP2B,PLAU,KLF4,EDN1,TEC,NFE2L2,PHLDB2,TNFAIP3
GO:2000045	regulation of G1/S transition of mitotic cell cycle	26	148	0.29	0.0401	9606.ENSP00000209728,9606.ENSP00000228872,9606.ENSP00000261254,9606.ENSP00000263620,9606.ENSP00000274289,9606.ENSP00000276925,9606.ENSP00000290551,9606.ENSP00000296257,9606.ENSP00000308546,9606.ENSP00000309968,9606.ENSP00000319482,9606.ENSP00000340989,9606.ENSP00000351416,9606.ENSP00000353734,9606.ENSP00000355205,9606.ENSP00000360025,9606.ENSP00000361275,9606.ENSP00000362608,9606.ENSP00000363804,…	CDC6,CDKN1B,CCND2,ARID3A,PLK2,CDKN2B,BTG2,SENP2,MEPCE,ADAM17,DCUN1D3,SFN,ANKRD17,PLAGL1,INO80,GADD45A,PLK3,PIM1,KLF4,RGCC,GPNMB,UBE2E2,RDX,CDKN1A,GIGYF2,CNOT4
GO:0016239	positive regulation of macroautophagy	14	59	0.42	0.0408	9606.ENSP00000212015,9606.ENSP00000216117,9606.ENSP00000220751,9606.ENSP00000253063,9606.ENSP00000298552,9606.ENSP00000331748,9606.ENSP00000346986,9606.ENSP00000348455,9606.ENSP00000354621,9606.ENSP00000365692,9606.ENSP00000365757,9606.ENSP00000368022,9606.ENSP00000482753,9606.ENSP00000483825	SIRT1,HMOX1,RIPK2,SESN2,TSC1,RAB12,WAC,UVRAG,SMURF1,PIM2,PIP4K2A,OPTN,C9orf72,IKBKG
GO:0050776	regulation of immune response	106	873	0.13	0.0413	9606.ENSP00000212015,9606.ENSP00000216037,9606.ENSP00000216117,9606.ENSP00000216797,9606.ENSP00000220751,9606.ENSP00000221452,9606.ENSP00000226574,9606.ENSP00000229332,9606.ENSP00000234420,9606.ENSP00000239882,9606.ENSP00000244869,9606.ENSP00000245414,9606.ENSP00000248244,9606.ENSP00000251849,9606.ENSP00000252229,9606.ENSP00000254066,9606.ENSP00000256458,9606.ENSP00000257604,9606.ENSP00000259808,…	SIRT1,XBP1,HMOX1,NFKBIA,RIPK2,RELB,NFKB1,CLEC4A,MSH6,ELF1,EREG,IRF1,TICAM1,RAF1,MICB,RARA,IRAK2,TRAFD1,RIPK1,SEMA7A,PIK3C3,NLRC5,UFD1L,BIRC3,MUL1,ICAM1,EIF2B2,PAK1,FER,PPARG,IFNGR2,STAT5B,F2RL1,HSP90B1,RUNX1,CRK,FADD,IL12A,ADORA2B,PRKCE,FOS,CLCF1,CLU,SUPT6H,MALT1,WIPF2,KARS,NFKBIZ,SOCS3,NPLOC4,PDE4B,SMAD3,POLR3C,CAV1,RIOK3,PSPC1,SFPQ,ANKRD17,PELI1,GPATCH3,DUSP10,ECM1,CHUK,BCL10,JUN,PTPN1,ZC3H12A,…
GO:0050658	RNA transport	31	189	0.26	0.0415	9606.ENSP00000254998,9606.ENSP00000272645,9606.ENSP00000291552,9606.ENSP00000295822,9606.ENSP00000296257,9606.ENSP00000297990,9606.ENSP00000298552,9606.ENSP00000306117,9606.ENSP00000316032,9606.ENSP00000319104,9606.ENSP00000322396,9606.ENSP00000333657,9606.ENSP00000339245,9606.ENSP00000345895,9606.ENSP00000349351,9606.ENSP00000352400,9606.ENSP00000356548,9606.ENSP00000362820,9606.ENSP00000363384,…	NXT1,POLR2D,U2AFBP,EIF5A2,SENP2,NOL6,TSC1,DDX19A,NUP98,SUPT6H,RRS1,MX2,YTHDC1,NUP50,BICD2,NUP214,LTV1,SRSF3,ZNF593,IGF2BP2,SRSF2,POM121,RAE1,AGFG1,PNPT1,SMG1,THOC5,ALYREF,NXF1,NUP153,ZFP36
GO:0010939	regulation of necrotic cell death	8	22	0.61	0.0415	9606.ENSP00000225174,9606.ENSP00000259808,9606.ENSP00000263464,9606.ENSP00000281456,9606.ENSP00000301838,9606.ENSP00000312455,9606.ENSP00000339191,9606.ENSP00000477613	PPIF,RIPK1,BIRC3,SLC25A4,FADD,CFLAR,CAV1,BIRC2
GO:0050778	positive regulation of immune response	76	589	0.16	0.0417	9606.ENSP00000212015,9606.ENSP00000216037,9606.ENSP00000216797,9606.ENSP00000220751,9606.ENSP00000221452,9606.ENSP00000226574,9606.ENSP00000229332,9606.ENSP00000234420,9606.ENSP00000244869,9606.ENSP00000248244,9606.ENSP00000251849,9606.ENSP00000252229,9606.ENSP00000254066,9606.ENSP00000256458,9606.ENSP00000259808,9606.ENSP00000261918,9606.ENSP00000262039,9606.ENSP00000262510,9606.ENSP00000266126,…	SIRT1,XBP1,NFKBIA,RIPK2,RELB,NFKB1,CLEC4A,MSH6,EREG,TICAM1,RAF1,MICB,RARA,IRAK2,RIPK1,SEMA7A,PIK3C3,NLRC5,EIF2B2,PAK1,STAT5B,F2RL1,HSP90B1,CRK,FADD,IL12A,ADORA2B,PRKCE,CLCF1,CLU,MALT1,WIPF2,KARS,NFKBIZ,PDE4B,POLR3C,CAV1,RIOK3,PSPC1,SFPQ,ANKRD17,PELI1,CHUK,BCL10,ZC3H12A,PTAFR,THEMIS2,HSPA1B,HLA-E,RGCC,DDX58,TRIM5,TEC,CD274,RSAD2,AP1G1,IL4R,POLR3D,RELA,TLR6,CYLD,EXOSC6,CMTM3,PVR,NCK1,MUC4,LAT2,FAM4…
GO:0060628	regulation of ER to Golgi vesicle-mediated transport	6	12	0.74	0.042	9606.ENSP00000260643,9606.ENSP00000274496,9606.ENSP00000304051,9606.ENSP00000344741,9606.ENSP00000346139,9606.ENSP00000390783	PREB,YIPF5,RNF139,INSIG1,TBC1D20,SCFD1
GO:0002694	regulation of leukocyte activation	63	470	0.17	0.0432	9606.ENSP00000216037,9606.ENSP00000216085,9606.ENSP00000216117,9606.ENSP00000220751,9606.ENSP00000234420,9606.ENSP00000245414,9606.ENSP00000245817,9606.ENSP00000248244,9606.ENSP00000254066,9606.ENSP00000260356,9606.ENSP00000263056,9606.ENSP00000265643,9606.ENSP00000278568,9606.ENSP00000281092,9606.ENSP00000284637,9606.ENSP00000293328,9606.ENSP00000296677,9606.ENSP00000300305,9606.ENSP00000301838,…	XBP1,RHBDD3,HMOX1,RIPK2,MSH6,IRF1,TNFSF9,TICAM1,RARA,THBS1,MAP3K8,GAL,PAK1,FER,SH3RF1,STAT5B,F2RL1,RUNX1,FADD,IL12A,ADORA2B,CEBPB,CLCF1,PIBF1,EGR3,HSPH1,SUPT6H,MALT1,ZNF335,KARS,NFKBIZ,CAV1,RNF41,NRARP,BTN2A2,PELI1,ZEB1,DUSP10,PRDM1,BCL10,DLG5,SDC4,ZC3H12A,PTAFR,HLA-E,CD83,CD274,GPNMB,AP1G1,IL4R,BCL6,CDKN1A,TLR6,CYLD,EXOSC6,MICA,NCK1,FAM49B,TRAF6,LDLR,ITCH,TNFAIP3,NR4A3
GO:0010564	regulation of cell cycle process	86	684	0.14	0.0433	9606.ENSP00000209728,9606.ENSP00000215904,9606.ENSP00000217402,9606.ENSP00000228872,9606.ENSP00000239223,9606.ENSP00000244869,9606.ENSP00000249075,9606.ENSP00000252992,9606.ENSP00000254605,9606.ENSP00000258774,9606.ENSP00000260372,9606.ENSP00000261254,9606.ENSP00000262039,9606.ENSP00000262294,9606.ENSP00000263062,9606.ENSP00000263339,9606.ENSP00000263377,9606.ENSP00000263620,9606.ENSP00000265165,…	CDC6,PDXP,CHMP4B,CDKN1B,DUSP1,EREG,LIF,CEP85,RRP8,HUS1,HAUS2,CCND2,PIK3C3,TRIM37,EPC1,IL1A,BRD4,ARID3A,LEF1,DYNC1LI1,PLK2,CDKN2B,ORAOV1,FBXW7,RIOK2,FLCN,NSMCE2,BTG2,TGFA,SENP2,TUBA1A,AURKC,CDC25A,PRKCE,SLC25A33,YWHAG,MEPCE,ADAM17,CRLF3,PINX1,PRMT5,DCUN1D3,CALR,YAF2,PDGFB,OVOL1,SFN,MCPH1,OFD1,UVRAG,DYNC1H1,PIWIL2,RASSF1,SFPQ,ANKRD17,PLAGL1,CDC14A,INO80,CTGF,PCGF6,GADD45A,PLK3,PIM1,GPR3,KLF4,HSPA1B…
GO:0070848	response to growth factor	67	507	0.17	0.0435	9606.ENSP00000212015,9606.ENSP00000216037,9606.ENSP00000220325,9606.ENSP00000224140,9606.ENSP00000227322,9606.ENSP00000229416,9606.ENSP00000239938,9606.ENSP00000249749,9606.ENSP00000251849,9606.ENSP00000252809,9606.ENSP00000259808,9606.ENSP00000260356,9606.ENSP00000263640,9606.ENSP00000264431,9606.ENSP00000265165,9606.ENSP00000265371,9606.ENSP00000269209,9606.ENSP00000272645,9606.ENSP00000281092,…	SIRT1,XBP1,EHD4,SETX,ZPR1,GCLC,EGR1,DLL4,RAF1,GDF15,RIPK1,THBS1,ACVR1,RAPGEF2,LEF1,NRP1,GAREM,POLR2D,FER,STAT5B,FGF19,CRK,FNTA,LRP8,FOS,CXCL8,DDIT4,RGMB,CFLAR,EGR3,HSPA5,PDGFB,SMAD3,CAV1,MAP2K3,EPHA2,SMURF1,KDM5B,CTGF,F11R,NUS1,SHOC2,GCLM,JUN,ANKRD1,KLF4,SPRY2,ERRFI1,FLRT3,BMP2,EDN1,GCNT2,FGFBP1,FAM83G,SLC33A1,USP8,RDX,KIF16B,RELA,FOXO3,CREB1,SKIL,TOB1,NR4A1,UBC,IER2,ZFP36
GO:1901679	nucleotide transmembrane transport	7	17	0.66	0.0435	9606.ENSP00000281456,9606.ENSP00000297578,9606.ENSP00000306328,9606.ENSP00000326693,9606.ENSP00000362159,9606.ENSP00000376587,9606.ENSP00000385312	SLC25A4,SLC25A32,SLC25A33,SLC25A42,SLC25A25,SLC33A1,SLC25A19
GO:0070536	protein K63-linked deubiquitination	9	28	0.55	0.0442	9606.ENSP00000306528,9606.ENSP00000326813,9606.ENSP00000352676,9606.ENSP00000366434,9606.ENSP00000379721,9606.ENSP00000383044,9606.ENSP00000392025,9606.ENSP00000462729,9606.ENSP00000481570	DESI2,YOD1,ZRANB1,UIMC1,USP8,USP25,CYLD,OTUD7B,TNFAIP3
GO:0009056	catabolic process	205	1859	0.09	0.0445	9606.ENSP00000157812,9606.ENSP00000158771,9606.ENSP00000171111,9606.ENSP00000179259,9606.ENSP00000185150,9606.ENSP00000209884,9606.ENSP00000212015,9606.ENSP00000215904,9606.ENSP00000216037,9606.ENSP00000216117,9606.ENSP00000217402,9606.ENSP00000218516,9606.ENSP00000219313,9606.ENSP00000220509,9606.ENSP00000221403,9606.ENSP00000222982,9606.ENSP00000227322,9606.ENSP00000228606,9606.ENSP00000231668,…	PSMC4,DERL2,KEAP1,C12orf5,ERLEC1,KLHL20,SIRT1,PDXP,XBP1,HMOX1,CHMP4B,GLA,PSMD7,VPS18,DHDH,CYP3A5,ZPR1,CYP27B1,BNIP1,RNF103,STBD1,RNF11,FBXL12,SDF2L1,DNAJB9,CDADC1,TRPC4AP,SESN2,PRKAB2,RNF122,KIAA0368,RIPK1,USP2,MMP13,LIPG,PSMD11,FAF2,PIK3C3,WIPI1,PRDX1,UFD1L,MECR,SLC9A1,PSMD3,MTRR,GABARAPL1,VPS37B,C18orf8,NPC1,POLR2D,PELO,NRBF2,CCRN4L,BTBD11,QDPR,FBXW7,USP12,PRKAG2,CBR3,TMEM199,CHAC2,KIAA0226,DAG…
GO:0033209	tumor necrosis factor-mediated signaling pathway	17	81	0.37	0.0446	9606.ENSP00000064780,9606.ENSP00000216797,9606.ENSP00000245817,9606.ENSP00000259808,9606.ENSP00000263464,9606.ENSP00000276431,9606.ENSP00000309968,9606.ENSP00000310263,9606.ENSP00000325448,9606.ENSP00000326737,9606.ENSP00000359424,9606.ENSP00000384273,9606.ENSP00000385824,9606.ENSP00000454207,9606.ENSP00000477613,9606.ENSP00000478699,9606.ENSP00000482657	RELT,NFKBIA,TNFSF9,RIPK1,BIRC3,TNFRSF10B,ADAM17,TNFRSF10D,KARS,TNFRSF12A,CHUK,RELA,FOXO3,TRAF3,BIRC2,TNFRSF9,MAP3K14
GO:0010594	regulation of endothelial cell migration	26	150	0.28	0.0454	9606.ENSP00000212015,9606.ENSP00000216117,9606.ENSP00000249749,9606.ENSP00000260356,9606.ENSP00000265371,9606.ENSP00000272233,9606.ENSP00000274289,9606.ENSP00000287820,9606.ENSP00000309968,9606.ENSP00000320866,9606.ENSP00000330382,9606.ENSP00000338785,9606.ENSP00000345083,9606.ENSP00000351209,9606.ENSP00000353032,9606.ENSP00000355925,9606.ENSP00000357392,9606.ENSP00000357480,9606.ENSP00000360296,…	SIRT1,HMOX1,DLL4,THBS1,NRP1,RHOB,PLK2,PPARG,ADAM17,CALR,PDGFB,STARD13,MAP2K3,EPHA2,P2RX4,PROX1,EFNA1,NUS1,PPAP2B,ZC3H12A,KLF4,RGCC,EDN1,FGFBP1,ETS1,NFE2L2
GO:0010595	positive regulation of endothelial cell migration	19	96	0.34	0.046	9606.ENSP00000212015,9606.ENSP00000216117,9606.ENSP00000260356,9606.ENSP00000265371,9606.ENSP00000272233,9606.ENSP00000274289,9606.ENSP00000309968,9606.ENSP00000320866,9606.ENSP00000330382,9606.ENSP00000345083,9606.ENSP00000353032,9606.ENSP00000355925,9606.ENSP00000357480,9606.ENSP00000360296,9606.ENSP00000362179,9606.ENSP00000368683,9606.ENSP00000371770,9606.ENSP00000376436,9606.ENSP00000380252	SIRT1,HMOX1,THBS1,NRP1,RHOB,PLK2,ADAM17,CALR,PDGFB,MAP2K3,P2RX4,PROX1,NUS1,PPAP2B,ZC3H12A,EDN1,FGFBP1,ETS1,NFE2L2
GO:0009617	response to bacterium	72	555	0.16	0.0462	9606.ENSP00000064780,9606.ENSP00000164227,9606.ENSP00000216037,9606.ENSP00000216797,9606.ENSP00000220751,9606.ENSP00000223095,9606.ENSP00000226574,9606.ENSP00000227752,9606.ENSP00000228606,9606.ENSP00000232496,9606.ENSP00000248244,9606.ENSP00000252818,9606.ENSP00000254066,9606.ENSP00000256458,9606.ENSP00000257787,9606.ENSP00000262510,9606.ENSP00000264832,9606.ENSP00000269701,9606.ENSP00000276431,…	RELT,BCL3,XBP1,NFKBIA,RIPK2,SERPINE1,NFKB1,IL10RA,CYP27B1,TUSC2,TICAM1,JUND,RARA,IRAK2,AKIRIN2,NLRC5,ICAM1,AKAP8,TNFRSF10B,CCRN4L,FER,CA3,FGF19,CXCL3,CXCL5,IL12A,JUNB,CEBPB,PRKCE,FOS,CXCL8,PPM1D,ADAM17,TNFRSF10D,TRIB1,NFKBIB,MALT1,PDE4B,CAV1,ANKRD17,PELI1,CTR9,DUSP10,IL6R,NFKB2,CHUK,ABCC2,BCL10,JUN,ANKRD1,ZC3H12A,PTAFR,HLA-E,OPTN,EDN1,SERPINB9,LYST,CXCL1,VIMP,TMF1,RELA,TLR6,CHD7,MICA,CXCL2,TRAF6,…
GO:0018205	peptidyl-lysine modification	38	250	0.23	0.0465	9606.ENSP00000212015,9606.ENSP00000216267,9606.ENSP00000235372,9606.ENSP00000242480,9606.ENSP00000255304,9606.ENSP00000256398,9606.ENSP00000263062,9606.ENSP00000264183,9606.ENSP00000264198,9606.ENSP00000265165,9606.ENSP00000269214,9606.ENSP00000287437,9606.ENSP00000296257,9606.ENSP00000300209,9606.ENSP00000308022,9606.ENSP00000314420,9606.ENSP00000325326,9606.ENSP00000327832,9606.ENSP00000339566,…	SIRT1,BRD1,PRDM2,EGR2,USPL1,ELP3,EPC1,ARID4B,MUL1,LEF1,ESCO1,NSMCE2,SENP2,METTL21B,TADA2B,PER1,ZNF335,ATAT1,HIST1H1C,ARID4A,BRPF3,TOPORS,CTR9,CRTC2,MRGBP,RLF,KDM6A,TAF9,METTL22,BRPF1,VCPKMT,SETD4,KDM3A,JMJD6,KANSL2,TET2,TRIM16,JADE3
GO:0071705	nitrogen compound transport	188	1690	0.09	0.047	9606.ENSP00000083182,9606.ENSP00000158771,9606.ENSP00000164227,9606.ENSP00000209884,9606.ENSP00000216037,9606.ENSP00000216797,9606.ENSP00000217402,9606.ENSP00000220509,9606.ENSP00000222547,9606.ENSP00000222812,9606.ENSP00000223369,9606.ENSP00000229314,9606.ENSP00000234256,9606.ENSP00000236137,9606.ENSP00000237612,9606.ENSP00000238855,9606.ENSP00000240333,9606.ENSP00000242480,9606.ENSP00000251849,…	APPBP2,DERL2,BCL3,KLHL20,XBP1,NFKBIA,CHMP4B,VPS18,BET1,STX1A,YKT6,GOLT1B,SLC1A4,SLC19A2,ABCG2,AFTPH,SLC35B1,EGR2,RAF1,TIMM10B,NXT1,RAB11FIP5,SLC19A3,COG3,SDCBP,PREB,FAF2,TMED2,UFD1L,ARFGAP3,SLC7A6OS,ARCN1,GRPEL1,GOLPH3,LSG1,ABCB6,GAL,EXPH5,SNX19,VPS37B,TRIP11,ARRDC4,PMM2,AKAP8,RHOB,POLR2D,RAB5A,YIPF5,NFKBIE,SLC22A3,SEC24D,SLC7A11,SLC25A4,PDIA4,PPARG,U2AFBP,STX5,EIF5A2,SENP2,F2RL1,SLC25A32,UBAP1,N…
GO:0008380	RNA splicing	54	391	0.19	0.0473	9606.ENSP00000170564,9606.ENSP00000216038,9606.ENSP00000216252,9606.ENSP00000217109,9606.ENSP00000224140,9606.ENSP00000227322,9606.ENSP00000244230,9606.ENSP00000257181,9606.ENSP00000262710,9606.ENSP00000267287,9606.ENSP00000268483,9606.ENSP00000272348,9606.ENSP00000272645,9606.ENSP00000291552,9606.ENSP00000297071,9606.ENSP00000297157,9606.ENSP00000297591,9606.ENSP00000298281,9606.ENSP00000305790,…	GPATCH1,RTCB,PHF5A,CSTF1,SETX,ZPR1,MPHOSPH10,PRPF38A,ACIN1,MBNL2,TXNL4B,SNRPG,POLR2D,U2AFBP,TRA2A,RP9,KIAA1429,PCF11,SF3B3,DDX19A,PRPF3,SUPT6H,PRMT5,AKAP17A,YTHDC1,PSPC1,CPSF7,PRPF39,PPP4R2,SFPQ,WTAP,KIAA0907,RBM15,PTBP2,RRAGC,SRSF3,AAR2,PRPF4,HABP4,SMN1,SRSF2,USP49,ZNF638,JMJD6,CDK12,TRA2B,PPP2CA,THOC5,ALYREF,CLP1,CELF1,CWC25,SRSF8,SRRT
GO:0006888	endoplasmic reticulum to Golgi vesicle-mediated transport	29	175	0.26	0.0474	9606.ENSP00000222547,9606.ENSP00000223369,9606.ENSP00000258654,9606.ENSP00000260643,9606.ENSP00000262225,9606.ENSP00000263245,9606.ENSP00000264028,9606.ENSP00000273130,9606.ENSP00000280551,9606.ENSP00000286760,9606.ENSP00000291574,9606.ENSP00000294179,9606.ENSP00000295400,9606.ENSP00000300087,9606.ENSP00000314615,9606.ENSP00000325827,9606.ENSP00000330945,9606.ENSP00000338844,9606.ENSP00000346139,…	BET1,YKT6,COG3,PREB,TMED2,ARFGAP3,ARCN1,DYNC1LI1,SEC24D,WHAMM,TRAPPC10,STX5,TGFA,DCTN5,ARFGAP1,SEC16A,TMED9,SEC23B,TBC1D20,DYNC1H1,VCP,SEC23IP,SAR1A,BET1L,GOLGB1,SEC31A,SEC24A,SCFD1,USO1
GO:1903052	positive regulation of proteolysis involved in cellular protein catabolic process	23	127	0.3	0.0474	9606.ENSP00000157812,9606.ENSP00000171111,9606.ENSP00000216037,9606.ENSP00000229416,9606.ENSP00000274289,9606.ENSP00000281708,9606.ENSP00000287437,9606.ENSP00000304051,9606.ENSP00000312150,9606.ENSP00000313391,9606.ENSP00000314619,9606.ENSP00000315130,9606.ENSP00000321239,9606.ENSP00000339191,9606.ENSP00000348769,9606.ENSP00000351777,9606.ENSP00000354621,9606.ENSP00000360690,9606.ENSP00000361275,…	PSMC4,KEAP1,XBP1,GCLC,PLK2,FBXW7,NSMCE2,RNF139,TRIB1,DAB2,ZFAND2A,CLU,RCHY1,CAV1,ARIH2,VCP,SMURF1,LONRF3,PLK3,RNF19B,NFE2L2,LONRF1,HERPUD1
GO:0001959	regulation of cytokine-mediated signaling pathway	26	151	0.28	0.0482	9606.ENSP00000220751,9606.ENSP00000239882,9606.ENSP00000256458,9606.ENSP00000259808,9606.ENSP00000262510,9606.ENSP00000263464,9606.ENSP00000264198,9606.ENSP00000287820,9606.ENSP00000290219,9606.ENSP00000296677,9606.ENSP00000300305,9606.ENSP00000301838,9606.ENSP00000309968,9606.ENSP00000327513,9606.ENSP00000330341,9606.ENSP00000339191,9606.ENSP00000358045,9606.ENSP00000359424,9606.ENSP00000360683,…	RIPK2,ELF1,IRAK2,RIPK1,NLRC5,BIRC3,MUL1,PPARG,IFNGR2,F2RL1,RUNX1,FADD,ADAM17,CSF1,SOCS3,CAV1,ECM1,CHUK,PTPN1,HSPA1B,EDN1,GPS2,CYLD,BIRC2,TNFAIP3,IKBKG
GO:0032147	activation of protein kinase activity	49	347	0.2	0.0485	9606.ENSP00000013125,9606.ENSP00000215631,9606.ENSP00000220751,9606.ENSP00000251849,9606.ENSP00000252809,9606.ENSP00000256458,9606.ENSP00000259808,9606.ENSP00000260356,9606.ENSP00000262013,9606.ENSP00000263056,9606.ENSP00000263881,9606.ENSP00000264198,9606.ENSP00000264276,9606.ENSP00000265026,9606.ENSP00000265960,9606.ENSP00000276431,9606.ENSP00000278568,9606.ENSP00000287878,9606.ENSP00000288602,…	MAP4K5,GADD45B,RIPK2,RAF1,GDF15,IRAK2,RIPK1,THBS1,SPAG9,MAP3K8,MAP4K3,MUL1,ALS2,MAP3K13,MAPKAP1,TNFRSF10B,PAK1,PRKAG2,BRAF,TGFA,CRK,ADORA2B,PIBF1,MALT1,KARS,PDGFB,SPDYA,MAP2K3,PEA15,DUSP5,SLK,AVPI1,GADD45A,PTPN1,DAXX,SPRY2,BMP2,RGCC,NKX3-1,CDKN1A,TLR6,MAP2K4,ENSG00000272752,CSB-PGBD3,TRAF6,UBC,MAP3K9,MAP3K14,IKBKG
GO:0043331	response to dsRNA	17	82	0.36	0.0486	9606.ENSP00000216797,9606.ENSP00000220751,9606.ENSP00000226574,9606.ENSP00000248244,9606.ENSP00000264198,9606.ENSP00000296215,9606.ENSP00000309142,9606.ENSP00000326119,9606.ENSP00000332973,9606.ENSP00000339191,9606.ENSP00000341874,9606.ENSP00000351789,9606.ENSP00000362287,9606.ENSP00000365130,9606.ENSP00000367123,9606.ENSP00000369213,9606.ENSP00000480421	NFKBIA,RIPK2,NFKB1,TICAM1,MUL1,SNIP1,PDE12,PMAIP1,SMAD3,CAV1,RIOK3,PELI1,AGO3,ZCCHC6,SLC3A2,DDX58,SRRT
GO:0006364	rRNA processing	31	192	0.25	0.0487	9606.ENSP00000199320,9606.ENSP00000212015,9606.ENSP00000230340,9606.ENSP00000244230,9606.ENSP00000254605,9606.ENSP00000261708,9606.ENSP00000283109,9606.ENSP00000296792,9606.ENSP00000297990,9606.ENSP00000301364,9606.ENSP00000306565,9606.ENSP00000308179,9606.ENSP00000308332,9606.ENSP00000314193,9606.ENSP00000322396,9606.ENSP00000323288,9606.ENSP00000323424,9606.ENSP00000327179,9606.ENSP00000341874,…	DIMT1,SIRT1,BYSL,MPHOSPH10,RRP8,UTP6,RIOK2,UTP15,NOL6,TSR1,ISG20,WDR3,UTP23,WDR75,RRS1,RPUSD2,ISG20L2,CIRH1A,RIOK3,WDR37,WDR55,MDN1,PDCD11,TEX10,RIOK1,NOP2,UTP14A,WDR43,CHD7,EXOSC6,NOL8
GO:0019218	regulation of steroid metabolic process	21	112	0.32	0.0488	9606.ENSP00000212015,9606.ENSP00000226574,9606.ENSP00000228606,9606.ENSP00000239938,9606.ENSP00000244050,9606.ENSP00000245787,9606.ENSP00000265643,9606.ENSP00000265896,9606.ENSP00000287936,9606.ENSP00000293328,9606.ENSP00000294312,9606.ENSP00000313377,9606.ENSP00000322706,9606.ENSP00000344741,9606.ENSP00000345702,9606.ENSP00000347717,9606.ENSP00000355925,9606.ENSP00000368104,9606.ENSP00000443551,…	SIRT1,NFKB1,CYP27B1,EGR1,SNAI1,INSIG2,GAL,SQLE,HMGCR,STAT5B,FGF19,PANK2,HMGCS1,INSIG1,NFYA,DHCR7,PROX1,BMP2,MVK,LDLR,SEC14L2
GO:0042542	response to hydrogen peroxide	21	112	0.32	0.0488	9606.ENSP00000212015,9606.ENSP00000216117,9606.ENSP00000224140,9606.ENSP00000225174,9606.ENSP00000239223,9606.ENSP00000254846,9606.ENSP00000272233,9606.ENSP00000300574,9606.ENSP00000310170,9606.ENSP00000347134,9606.ENSP00000356156,9606.ENSP00000356410,9606.ENSP00000360266,9606.ENSP00000363591,9606.ENSP00000363804,9606.ENSP00000376436,9606.ENSP00000380252,9606.ENSP00000384273,9606.ENSP00000433560,…	SIRT1,HMOX1,SETX,PPIF,DUSP1,KDM6B,RHOB,CRK,FOSL1,NET1,PPP1R15B,GLRX2,JUN,BAK1,KLF4,ETS1,NFE2L2,RELA,CRYAB,TNFAIP3,NR4A3
GO:1901800	positive regulation of proteasomal protein catabolic process	21	112	0.32	0.0488	9606.ENSP00000157812,9606.ENSP00000171111,9606.ENSP00000216037,9606.ENSP00000229416,9606.ENSP00000274289,9606.ENSP00000281708,9606.ENSP00000287437,9606.ENSP00000312150,9606.ENSP00000313391,9606.ENSP00000314619,9606.ENSP00000315130,9606.ENSP00000321239,9606.ENSP00000339191,9606.ENSP00000348769,9606.ENSP00000351777,9606.ENSP00000360690,9606.ENSP00000361275,9606.ENSP00000362555,9606.ENSP00000380252,…	PSMC4,KEAP1,XBP1,GCLC,PLK2,FBXW7,NSMCE2,TRIB1,DAB2,ZFAND2A,CLU,RCHY1,CAV1,ARIH2,VCP,LONRF3,PLK3,RNF19B,NFE2L2,LONRF1,HERPUD1
GO:0010894	negative regulation of steroid biosynthetic process	8	23	0.59	0.0489	9606.ENSP00000226574,9606.ENSP00000228606,9606.ENSP00000244050,9606.ENSP00000245787,9606.ENSP00000294312,9606.ENSP00000344741,9606.ENSP00000355925,9606.ENSP00000368104	NFKB1,CYP27B1,SNAI1,INSIG2,FGF19,INSIG1,PROX1,BMP2
GO:0042274	ribosomal small subunit biogenesis	15	68	0.39	0.0498	9606.ENSP00000230340,9606.ENSP00000244230,9606.ENSP00000261708,9606.ENSP00000275820,9606.ENSP00000283109,9606.ENSP00000301364,9606.ENSP00000308179,9606.ENSP00000308332,9606.ENSP00000322396,9606.ENSP00000327179,9606.ENSP00000341874,9606.ENSP00000356548,9606.ENSP00000358812,9606.ENSP00000369162,9606.ENSP00000377944	BYSL,MPHOSPH10,UTP6,NOM1,RIOK2,TSR1,WDR3,UTP23,RRS1,CIRH1A,RIOK3,LTV1,PDCD11,RIOK1,UTP14A

## Sheet: 1st_2000_Genes_KEGG_up
Supplementary table S5: Results from the Gene Ontology (GO) analysis in the category for biological process complete (GObp) and Pathway Enrichment (KEGG pathways) in BCoV infected cells at 72 hpi.
#term ID	term description	observed gene count	background gene count	strength	false discovery rate	matching proteins in your network (IDs)	matching proteins in your network (labels)
hsa04668	TNF signaling pathway	37	108	0.58	1.14e-07	9606.ENSP00000164227,9606.ENSP00000216797,9606.ENSP00000226574,9606.ENSP00000249075,9606.ENSP00000254958,9606.ENSP00000259808,9606.ENSP00000263056,9606.ENSP00000263464,9606.ENSP00000264832,9606.ENSP00000296026,9606.ENSP00000296027,9606.ENSP00000301838,9606.ENSP00000303315,9606.ENSP00000305422,9606.ENSP00000306245,9606.ENSP00000312455,9606.ENSP00000327513,9606.ENSP00000330341,9606.ENSP00000342136,…	BCL3,NFKBIA,NFKB1,LIF,JAG1,RIPK1,MAP3K8,BIRC3,ICAM1,CXCL3,CXCL5,FADD,JUNB,CEBPB,FOS,CFLAR,CSF1,SOCS3,CREB3,MAP2K3,CREB5,CASP7,CHUK,JUN,EDN1,CXCL1,RELA,CREB1,MAP2K4,CXCL2,TRAF3,BIRC2,RPS6KA5,ITCH,TNFAIP3,MAP3K14,IKBKG
hsa04141	Protein processing in endoplasmic reticulum	38	161	0.42	0.00014	9606.ENSP00000158771,9606.ENSP00000185150,9606.ENSP00000200453,9606.ENSP00000216037,9606.ENSP00000254322,9606.ENSP00000256383,9606.ENSP00000260643,9606.ENSP00000263202,9606.ENSP00000280551,9606.ENSP00000286091,9606.ENSP00000296255,9606.ENSP00000298428,9606.ENSP00000299767,9606.ENSP00000307235,9606.ENSP00000314030,9606.ENSP00000318687,9606.ENSP00000320866,9606.ENSP00000324173,9606.ENSP00000326813,…	DERL2,ERLEC1,PPP1R15A,XBP1,DNAJB1,EIF2S1,PREB,UFD1L,SEC24D,PDIA4,RPN1,SEC61A2,HSP90B1,EIF2AK3,DNAJA2,HSPH1,CALR,HSPA5,YOD1,P4HB,NPLOC4,SEC23B,VCP,SAR1A,BAK1,SYVN1,CKAP4,STT3A,SEC31A,NFE2L2,VIMP,SEC24A,UBE2J2,HERPUD1,BAG1,CRYAB,DDIT3,DNAJC3
hsa04657	IL-17 signaling pathway	25	92	0.48	0.00085	9606.ENSP00000216797,9606.ENSP00000226574,9606.ENSP00000245919,9606.ENSP00000252818,9606.ENSP00000260302,9606.ENSP00000261845,9606.ENSP00000296026,9606.ENSP00000296027,9606.ENSP00000299767,9606.ENSP00000301838,9606.ENSP00000305422,9606.ENSP00000306245,9606.ENSP00000306512,9606.ENSP00000310170,9606.ENSP00000322788,9606.ENSP00000359424,9606.ENSP00000360266,9606.ENSP00000379110,9606.ENSP00000383044,…	NFKBIA,NFKB1,FOSB,JUND,MMP13,MAPK6,CXCL3,CXCL5,HSP90B1,FADD,CEBPB,FOS,CXCL8,FOSL1,MMP1,CHUK,JUN,CXCL1,USP25,RELA,CXCL2,TRAF6,TRAF3,TNFAIP3,IKBKG
hsa04064	NF-kappa B signaling pathway	24	93	0.46	0.002	9606.ENSP00000215631,9606.ENSP00000216797,9606.ENSP00000221452,9606.ENSP00000226574,9606.ENSP00000248244,9606.ENSP00000259808,9606.ENSP00000263464,9606.ENSP00000264832,9606.ENSP00000306512,9606.ENSP00000312455,9606.ENSP00000319279,9606.ENSP00000358983,9606.ENSP00000359424,9606.ENSP00000359612,9606.ENSP00000361850,9606.ENSP00000369213,9606.ENSP00000384273,9606.ENSP00000427279,9606.ENSP00000433623,…	GADD45B,NFKBIA,RELB,NFKB1,TICAM1,RIPK1,BIRC3,ICAM1,CXCL8,CFLAR,MALT1,NFKB2,CHUK,BCL10,PLAU,DDX58,RELA,CXCL2,TRAF6,TRAF3,BIRC2,TNFAIP3,MAP3K14,IKBKG
hsa05169	Epstein-Barr virus infection	38	194	0.34	0.0022	9606.ENSP00000157812,9606.ENSP00000216797,9606.ENSP00000219313,9606.ENSP00000221452,9606.ENSP00000226574,9606.ENSP00000227752,9606.ENSP00000228872,9606.ENSP00000237264,9606.ENSP00000259808,9606.ENSP00000261712,9606.ENSP00000264639,9606.ENSP00000264832,9606.ENSP00000272645,9606.ENSP00000275015,9606.ENSP00000283875,9606.ENSP00000306330,9606.ENSP00000307235,9606.ENSP00000312988,9606.ENSP00000334564,…	PSMC4,NFKBIA,PSMD7,RELB,NFKB1,IL10RA,CDKN1B,TBPL1,RIPK1,PSMD11,PSMD3,ICAM1,POLR2D,NFKBIE,GTF2E1,YWHAG,EIF2AK3,NFKBIB,POLR3C,MAP2K3,NUP214,NFKB2,CHUK,JUN,POLR3A,POLR1C,HLA-E,DDX58,TBP,POLR3D,RELA,CDKN1A,MAP2K4,TRAF6,TRAF3,TNFAIP3,MAP3K14,IKBKG
hsa04380	Osteoclast differentiation	28	124	0.4	0.0023	9606.ENSP00000216797,9606.ENSP00000221452,9606.ENSP00000226574,9606.ENSP00000245919,9606.ENSP00000252818,9606.ENSP00000263339,9606.ENSP00000264716,9606.ENSP00000287820,9606.ENSP00000290219,9606.ENSP00000295600,9606.ENSP00000303315,9606.ENSP00000306245,9606.ENSP00000310170,9606.ENSP00000327513,9606.ENSP00000330341,9606.ENSP00000358983,9606.ENSP00000359424,9606.ENSP00000360266,9606.ENSP00000370912,…	NFKBIA,RELB,NFKB1,FOSB,JUND,IL1A,FOSL2,PPARG,IFNGR2,MITF,JUNB,FOS,FOSL1,CSF1,SOCS3,NFKB2,CHUK,JUN,TEC,SQSTM1,PPP3CC,RELA,FHL2,CREB1,CYLD,TRAF6,MAP3K14,IKBKG
hsa04210	Apoptosis	29	135	0.38	0.0032	9606.ENSP00000215631,9606.ENSP00000216797,9606.ENSP00000226574,9606.ENSP00000251849,9606.ENSP00000256383,9606.ENSP00000259808,9606.ENSP00000263464,9606.ENSP00000276431,9606.ENSP00000301071,9606.ENSP00000301838,9606.ENSP00000306245,9606.ENSP00000307235,9606.ENSP00000310263,9606.ENSP00000312455,9606.ENSP00000326119,9606.ENSP00000333326,9606.ENSP00000358022,9606.ENSP00000358327,9606.ENSP00000359424,…	GADD45B,NFKBIA,NFKB1,RAF1,EIF2S1,RIPK1,BIRC3,TNFRSF10B,TUBA1A,FADD,FOS,EIF2AK3,TNFRSF10D,CFLAR,PMAIP1,TUBA8,MCL1,CASP7,CHUK,GADD45A,JUN,BAK1,DAXX,RELA,DIABLO,DDIT3,BIRC2,MAP3K14,IKBKG
hsa04010	MAPK signaling pathway	49	293	0.27	0.0041	9606.ENSP00000215631,9606.ENSP00000216373,9606.ENSP00000221452,9606.ENSP00000226574,9606.ENSP00000239223,9606.ENSP00000244869,9606.ENSP00000251849,9606.ENSP00000252818,9606.ENSP00000263056,9606.ENSP00000263339,9606.ENSP00000263881,9606.ENSP00000264431,9606.ENSP00000265026,9606.ENSP00000265354,9606.ENSP00000278568,9606.ENSP00000283228,9606.ENSP00000288602,9606.ENSP00000288943,9606.ENSP00000294312,…	GADD45B,SOS2,RELB,NFKB1,DUSP1,EREG,RAF1,JUND,MAP3K8,IL1A,MAP4K3,RAPGEF2,MAP3K13,SRF,PAK1,PTPRR,BRAF,DUSP2,FGF19,TGFA,DUSP16,CRK,FOS,CSF1,PDGFB,MAP2K3,PDGFA,EPHA2,DUSP10,EFNA1,DUSP5,NFKB2,CHUK,GADD45A,JUN,DAXX,DUSP8,PPP3CC,RASGRP3,RELA,MAP2K4,TRAF6,RPS6KA1,NR4A1,DDIT3,PLA2G4C,RPS6KA5,MAP3K14,IKBKG
hsa05215	Prostate cancer	22	97	0.4	0.0091	9606.ENSP00000216373,9606.ENSP00000216797,9606.ENSP00000226574,9606.ENSP00000228872,9606.ENSP00000251849,9606.ENSP00000265165,9606.ENSP00000288602,9606.ENSP00000295400,9606.ENSP00000299767,9606.ENSP00000306894,9606.ENSP00000330382,9606.ENSP00000342136,9606.ENSP00000346508,9606.ENSP00000350359,9606.ENSP00000354487,9606.ENSP00000359424,9606.ENSP00000361850,9606.ENSP00000370253,9606.ENSP00000384273,…	SOS2,NFKBIA,NFKB1,CDKN1B,RAF1,LEF1,BRAF,TGFA,HSP90B1,ETV5,PDGFB,CREB3,PDGFA,CREB5,ZEB1,CHUK,PLAU,NKX3-1,RELA,CDKN1A,CREB1,IKBKG
hsa05168	Herpes simplex infection	33	181	0.31	0.011	9606.ENSP00000216797,9606.ENSP00000226574,9606.ENSP00000237264,9606.ENSP00000248244,9606.ENSP00000254657,9606.ENSP00000256383,9606.ENSP00000269142,9606.ENSP00000290219,9606.ENSP00000290663,9606.ENSP00000301838,9606.ENSP00000303231,9606.ENSP00000306245,9606.ENSP00000307235,9606.ENSP00000312988,9606.ENSP00000314420,9606.ENSP00000330341,9606.ENSP00000346206,9606.ENSP00000359424,9606.ENSP00000360266,…	NFKBIA,NFKB1,TBPL1,TICAM1,PER2,EIF2S1,TAF4B,IFNGR2,MED8,FADD,IL12A,FOS,EIF2AK3,NFKBIB,PER1,SOCS3,TAP1,CHUK,JUN,SRSF3,DAXX,HLA-E,DDX58,TBP,SRSF2,RELA,ARNTL,ALYREF,TRAF6,NXF1,TRAF3,SRSF8,IKBKG
hsa05134	Legionellosis	15	54	0.49	0.0116	9606.ENSP00000216797,9606.ENSP00000226574,9606.ENSP00000296026,9606.ENSP00000303231,9606.ENSP00000306512,9606.ENSP00000351777,9606.ENSP00000356811,9606.ENSP00000358327,9606.ENSP00000358983,9606.ENSP00000362339,9606.ENSP00000379110,9606.ENSP00000384273,9606.ENSP00000394734,9606.ENSP00000427279,9606.ENSP00000480836	NFKBIA,NFKB1,CXCL3,IL12A,CXCL8,VCP,HBS1L,CASP7,NFKB2,SAR1A,CXCL1,RELA,CLK1,CXCL2,BCL2L13
hsa05142	Chagas disease (American trypanosomiasis)	22	101	0.38	0.0116	9606.ENSP00000216797,9606.ENSP00000223095,9606.ENSP00000226574,9606.ENSP00000248244,9606.ENSP00000290219,9606.ENSP00000301838,9606.ENSP00000303231,9606.ENSP00000306245,9606.ENSP00000306512,9606.ENSP00000312455,9606.ENSP00000320866,9606.ENSP00000325074,9606.ENSP00000332973,9606.ENSP00000359424,9606.ENSP00000360266,9606.ENSP00000384273,9606.ENSP00000389600,9606.ENSP00000410402,9606.ENSP00000418447,…	NFKBIA,SERPINE1,NFKB1,TICAM1,IFNGR2,FADD,IL12A,FOS,CXCL8,CFLAR,CALR,PPP2R2A,SMAD3,CHUK,JUN,RELA,TLR6,MAP2K4,PPP2CA,TRAF6,BDKRB2,IKBKG
hsa05166	HTLV-I infection	41	250	0.26	0.0116	9606.ENSP00000216037,9606.ENSP00000216797,9606.ENSP00000221452,9606.ENSP00000226574,9606.ENSP00000237264,9606.ENSP00000239938,9606.ENSP00000242480,9606.ENSP00000261254,9606.ENSP00000264832,9606.ENSP00000265354,9606.ENSP00000265371,9606.ENSP00000265372,9606.ENSP00000268184,9606.ENSP00000276925,9606.ENSP00000281456,9606.ENSP00000293328,9606.ENSP00000306245,9606.ENSP00000310170,9606.ENSP00000316054,…	XBP1,NFKBIA,RELB,NFKB1,TBPL1,EGR1,EGR2,CCND2,ICAM1,SRF,NRP1,CREM,CRTC3,CDKN2B,SLC25A4,STAT5B,FOS,FOSL1,DVL3,CALR,PDGFB,SMAD3,ATF3,PDGFA,ETS2,CRTC2,NFKB2,CHUK,JUN,HLA-E,GPS2,TBP,ETS1,PPP3CC,RELA,CDKN1A,CREB1,MAP2K4,ZFP36,MAP3K14,IKBKG
hsa05202	Transcriptional misregulation in cancer	31	169	0.31	0.0116	9606.ENSP00000215631,9606.ENSP00000226574,9606.ENSP00000228872,9606.ENSP00000254066,9606.ENSP00000254657,9606.ENSP00000261254,9606.ENSP00000263464,9606.ENSP00000264157,9606.ENSP00000287820,9606.ENSP00000295025,9606.ENSP00000295600,9606.ENSP00000300305,9606.ENSP00000305422,9606.ENSP00000306512,9606.ENSP00000306894,9606.ENSP00000314129,9606.ENSP00000325663,9606.ENSP00000346508,9606.ENSP00000354487,…	GADD45B,NFKB1,CDKN1B,RARA,PER2,CCND2,BIRC3,CCNT2,PPARG,REL,MITF,RUNX1,CEBPB,CXCL8,ETV5,TFE3,NFKBIZ,PDGFA,ZEB1,GADD45A,PLAU,BAK1,ZBTB17,KDM6A,IGFBP3,JMJD1C,RELA,BCL6,CDKN1A,DDIT3,NR4A3
hsa03008	Ribosome biogenesis in eukaryotes	18	76	0.42	0.0123	9606.ENSP00000244230,9606.ENSP00000254998,9606.ENSP00000261708,9606.ENSP00000265245,9606.ENSP00000283109,9606.ENSP00000296792,9606.ENSP00000297990,9606.ENSP00000308179,9606.ENSP00000314193,9606.ENSP00000327179,9606.ENSP00000358400,9606.ENSP00000369162,9606.ENSP00000370201,9606.ENSP00000377944,9606.ENSP00000384302,9606.ENSP00000385787,9606.ENSP00000436679,9606.ENSP00000478982	MPHOSPH10,NXT1,UTP6,LSG1,RIOK2,UTP15,NOL6,WDR3,WDR75,CIRH1A,MDN1,RIOK1,TAF9,UTP14A,WDR43,POP1,NXF1,RPP38
hsa05120	Epithelial cell signaling in Helicobacter pylori infection	16	66	0.43	0.0184	9606.ENSP00000216797,9606.ENSP00000226574,9606.ENSP00000230990,9606.ENSP00000278568,9606.ENSP00000281537,9606.ENSP00000306512,9606.ENSP00000309968,9606.ENSP00000357005,9606.ENSP00000359424,9606.ENSP00000360266,9606.ENSP00000379110,9606.ENSP00000384273,9606.ENSP00000410402,9606.ENSP00000434729,9606.ENSP00000482657,9606.ENSP00000483825	NFKBIA,NFKB1,HBEGF,PAK1,TJP1,CXCL8,ADAM17,F11R,CHUK,JUN,CXCL1,RELA,MAP2K4,ATP6V0B,MAP3K14,IKBKG
hsa04710	Circadian rhythm	10	30	0.57	0.0216	9606.ENSP00000242728,9606.ENSP00000254101,9606.ENSP00000254657,9606.ENSP00000256495,9606.ENSP00000287878,9606.ENSP00000314420,9606.ENSP00000359206,9606.ENSP00000384517,9606.ENSP00000387699,9606.ENSP00000478187	BHLHE41,PRKAB2,PER2,BHLHE40,PRKAG2,PER1,BTRC,ARNTL,CREB1,CRY2
hsa05220	Chronic myeloid leukemia	17	76	0.39	0.0246	9606.ENSP00000215631,9606.ENSP00000216373,9606.ENSP00000216797,9606.ENSP00000226574,9606.ENSP00000228872,9606.ENSP00000251849,9606.ENSP00000288602,9606.ENSP00000293328,9606.ENSP00000300305,9606.ENSP00000300574,9606.ENSP00000332973,9606.ENSP00000359424,9606.ENSP00000360025,9606.ENSP00000363591,9606.ENSP00000384273,9606.ENSP00000384849,9606.ENSP00000483825	GADD45B,SOS2,NFKBIA,NFKB1,CDKN1B,RAF1,BRAF,STAT5B,RUNX1,CRK,SMAD3,CHUK,GADD45A,BAK1,RELA,CDKN1A,IKBKG
hsa04662	B cell receptor signaling pathway	16	71	0.4	0.0259	9606.ENSP00000216373,9606.ENSP00000216797,9606.ENSP00000226574,9606.ENSP00000251849,9606.ENSP00000275015,9606.ENSP00000306245,9606.ENSP00000312988,9606.ENSP00000319279,9606.ENSP00000359424,9606.ENSP00000359612,9606.ENSP00000360266,9606.ENSP00000380878,9606.ENSP00000384192,9606.ENSP00000384273,9606.ENSP00000423602,9606.ENSP00000483825	SOS2,NFKBIA,NFKB1,RAF1,NFKBIE,FOS,NFKBIB,MALT1,CHUK,BCL10,JUN,PPP3CC,RASGRP3,RELA,DAPP1,IKBKG
hsa05164	Influenza A	29	168	0.28	0.0259	9606.ENSP00000216797,9606.ENSP00000226574,9606.ENSP00000248244,9606.ENSP00000251849,9606.ENSP00000254322,9606.ENSP00000254998,9606.ENSP00000256383,9606.ENSP00000263339,9606.ENSP00000264832,9606.ENSP00000276431,9606.ENSP00000290219,9606.ENSP00000303231,9606.ENSP00000306512,9606.ENSP00000307235,9606.ENSP00000310263,9606.ENSP00000312988,9606.ENSP00000316032,9606.ENSP00000330341,9606.ENSP00000345083,…	NFKBIA,NFKB1,TICAM1,RAF1,DNAJB1,NXT1,EIF2S1,IL1A,ICAM1,TNFRSF10B,IFNGR2,IL12A,CXCL8,EIF2AK3,TNFRSF10D,NFKBIB,NUP98,SOCS3,MAP2K3,PRSS3,JUN,DDX58,RSAD2,RAE1,RELA,AGFG1,MAP2K4,NXF1,DNAJC3
hsa05200	Pathways in cancer	69	515	0.17	0.0259	9606.ENSP00000171111,9606.ENSP00000215631,9606.ENSP00000216117,9606.ENSP00000216373,9606.ENSP00000216797,9606.ENSP00000226574,9606.ENSP00000228872,9606.ENSP00000234420,9606.ENSP00000249749,9606.ENSP00000250457,9606.ENSP00000251849,9606.ENSP00000254066,9606.ENSP00000254958,9606.ENSP00000261254,9606.ENSP00000263464,9606.ENSP00000265165,9606.ENSP00000276925,9606.ENSP00000287820,9606.ENSP00000288602,…	KEAP1,GADD45B,HMOX1,SOS2,NFKBIA,NFKB1,CDKN1B,MSH6,DLL4,EGLN3,RAF1,RARA,JAG1,CCND2,BIRC3,LEF1,CDKN2B,PPARG,BRAF,IFNGR2,STAT5B,FGF19,TGFA,MITF,HSP90B1,RUNX1,CRK,FADD,IL12A,FOS,CXCL8,DVL3,MMP1,LAMA3,PMAIP1,PDGFB,SMAD3,PDGFA,RASSF1,ARNT,IL6R,CASP7,NFKB2,CHUK,GADD45A,JUN,PIM1,BAK1,ZBTB17,PIM2,BMP2,NKX3-1,LAMA1,ETS1,IL4R,NFE2L2,RASGRP3,RELA,CDKN1A,LAMA2,GNA13,TRAF6,TXNRD1,BDKRB2,TRAF3,EGLN2,BIRC2,RPS6K…
hsa05222	Small cell lung cancer	19	92	0.36	0.0259	9606.ENSP00000215631,9606.ENSP00000216797,9606.ENSP00000226574,9606.ENSP00000228872,9606.ENSP00000263464,9606.ENSP00000276925,9606.ENSP00000324532,9606.ENSP00000359424,9606.ENSP00000360025,9606.ENSP00000363591,9606.ENSP00000364885,9606.ENSP00000374309,9606.ENSP00000384273,9606.ENSP00000384849,9606.ENSP00000400365,9606.ENSP00000433623,9606.ENSP00000454207,9606.ENSP00000477613,9606.ENSP00000483825	GADD45B,NFKBIA,NFKB1,CDKN1B,BIRC3,CDKN2B,LAMA3,CHUK,GADD45A,BAK1,ZBTB17,LAMA1,RELA,CDKN1A,LAMA2,TRAF6,TRAF3,BIRC2,IKBKG
hsa05160	Hepatitis C	24	131	0.31	0.0268	9606.ENSP00000216373,9606.ENSP00000216797,9606.ENSP00000226574,9606.ENSP00000245414,9606.ENSP00000248244,9606.ENSP00000251849,9606.ENSP00000256383,9606.ENSP00000259808,9606.ENSP00000288602,9606.ENSP00000306512,9606.ENSP00000307235,9606.ENSP00000325074,9606.ENSP00000330341,9606.ENSP00000347379,9606.ENSP00000359424,9606.ENSP00000369213,9606.ENSP00000384273,9606.ENSP00000384849,9606.ENSP00000409544,…	SOS2,NFKBIA,NFKB1,IRF1,TICAM1,RAF1,EIF2S1,RIPK1,BRAF,CXCL8,EIF2AK3,PPP2R2A,SOCS3,OCLN,CHUK,DDX58,RELA,CDKN1A,CLDN4,PPP2CA,TRAF6,LDLR,TRAF3,IKBKG
hsa05206	MicroRNAs in cancer	26	149	0.29	0.0311	9606.ENSP00000212015,9606.ENSP00000216117,9606.ENSP00000216373,9606.ENSP00000226574,9606.ENSP00000228872,9606.ENSP00000251849,9606.ENSP00000260356,9606.ENSP00000261254,9606.ENSP00000293379,9606.ENSP00000300574,9606.ENSP00000303706,9606.ENSP00000306124,9606.ENSP00000307305,9606.ENSP00000330382,9606.ENSP00000346508,9606.ENSP00000349547,9606.ENSP00000354487,9606.ENSP00000358022,9606.ENSP00000361850,…	SIRT1,HMOX1,SOS2,NFKB1,CDKN1B,RAF1,THBS1,CCND2,ITGA5,CRK,CDC25A,PRKCE,DDIT4,PDGFB,PDGFA,RASSF1,ZEB1,MCL1,PLAU,PIM1,BAK1,SPRY2,ABCC1,RDX,CDKN1A,RPS6KA5
hsa03060	Protein export	8	23	0.59	0.036	9606.ENSP00000298428,9606.ENSP00000324173,9606.ENSP00000328023,9606.ENSP00000342181,9606.ENSP00000418401,9606.ENSP00000424870,9606.ENSP00000451818,9606.ENSP00000468633	SEC61A2,HSPA5,SRPR,SRP72,SRPRB,SRP19,SRP54,SEC11C
hsa05211	Renal cell carcinoma	15	68	0.39	0.036	9606.ENSP00000216373,9606.ENSP00000250457,9606.ENSP00000251849,9606.ENSP00000278568,9606.ENSP00000285071,9606.ENSP00000288602,9606.ENSP00000295400,9606.ENSP00000300574,9606.ENSP00000314129,9606.ENSP00000330382,9606.ENSP00000351407,9606.ENSP00000360266,9606.ENSP00000376436,9606.ENSP00000384849,9606.ENSP00000469686	SOS2,EGLN3,RAF1,PAK1,FLCN,BRAF,TGFA,CRK,TFE3,PDGFB,ARNT,JUN,ETS1,CDKN1A,EGLN2
hsa04660	T cell receptor signaling pathway	19	99	0.33	0.0408	9606.ENSP00000216373,9606.ENSP00000216797,9606.ENSP00000226574,9606.ENSP00000251849,9606.ENSP00000263056,9606.ENSP00000275015,9606.ENSP00000278568,9606.ENSP00000306245,9606.ENSP00000312988,9606.ENSP00000319279,9606.ENSP00000359424,9606.ENSP00000359612,9606.ENSP00000360266,9606.ENSP00000370912,9606.ENSP00000380878,9606.ENSP00000384273,9606.ENSP00000417273,9606.ENSP00000482657,9606.ENSP00000483825	SOS2,NFKBIA,NFKB1,RAF1,MAP3K8,NFKBIE,PAK1,FOS,NFKBIB,MALT1,CHUK,BCL10,JUN,TEC,PPP3CC,RELA,NCK1,MAP3K14,IKBKG
hsa04218	Cellular senescence	26	156	0.27	0.0457	9606.ENSP00000212015,9606.ENSP00000215631,9606.ENSP00000223095,9606.ENSP00000226574,9606.ENSP00000251849,9606.ENSP00000258774,9606.ENSP00000261254,9606.ENSP00000263339,9606.ENSP00000276925,9606.ENSP00000281456,9606.ENSP00000298552,9606.ENSP00000301159,9606.ENSP00000303706,9606.ENSP00000306512,9606.ENSP00000332973,9606.ENSP00000345083,9606.ENSP00000359206,9606.ENSP00000360025,9606.ENSP00000365817,…	SIRT1,GADD45B,SERPINE1,NFKB1,RAF1,HUS1,CCND2,IL1A,CDKN2B,SLC25A4,TSC1,LIN37,CDC25A,CXCL8,SMAD3,MAP2K3,BTRC,GADD45A,HLA-E,IGFBP3,SQSTM1,ETS1,PPP3CC,RELA,CDKN1A,FOXO3

## Sheet: 1st_2000_Genes_Bio_Proc_Down
Supplementary table S5: Results from the Gene Ontology (GO) analysis in the category for biological process complete (GObp) and Pathway Enrichment (KEGG pathways) in BCoV infected cells at 72 hpi.
#term ID	term description	observed gene count	background gene count	strength	false discovery rate	matching proteins in your network (IDs)	matching proteins in your network (labels)
GO:0006614	SRP-dependent cotranslational protein targeting to membrane	45	92	0.8	7.51e-15	9606.ENSP00000222247,9606.ENSP00000225430,9606.ENSP00000267884,9606.ENSP00000274242,9606.ENSP00000278572,9606.ENSP00000296674,9606.ENSP00000322419,9606.ENSP00000339095,9606.ENSP00000341885,9606.ENSP00000345957,9606.ENSP00000346015,9606.ENSP00000346050,9606.ENSP00000346088,9606.ENSP00000348849,9606.ENSP00000354739,9606.ENSP00000357555,9606.ENSP00000359345,9606.ENSP00000361076,9606.ENSP00000362744,…	RPL18A,RPL19,SRP14,RPL37,RPS3,RPS23,RPLP2,RPS7,RPS2,RPS21,RPL27A,RPS3A,RPL22,RPS26,RPL12,RPS27,RPL5,RPL7A,RPS4X,RPL10A,RPL11,RPL13A,RPL34,RPS29,RPL14,RPS8,RPS14,RPL31,RPL23A,RPS18,RPL17,RPL6,RPL10,RPL29,RPL35A,RPL23,RPS20,RPS25,RPL28,RPL36,RPL27,RPS15,RPS19,RPS5,RPS10
GO:0045047	protein targeting to ER	46	101	0.77	1.37e-14	9606.ENSP00000222247,9606.ENSP00000225430,9606.ENSP00000267884,9606.ENSP00000274242,9606.ENSP00000278572,9606.ENSP00000296674,9606.ENSP00000322419,9606.ENSP00000324205,9606.ENSP00000339095,9606.ENSP00000341885,9606.ENSP00000345957,9606.ENSP00000346015,9606.ENSP00000346050,9606.ENSP00000346088,9606.ENSP00000348849,9606.ENSP00000354739,9606.ENSP00000357555,9606.ENSP00000359345,9606.ENSP00000361076,…	RPL18A,RPL19,SRP14,RPL37,RPS3,RPS23,RPLP2,CHMP4A,RPS7,RPS2,RPS21,RPL27A,RPS3A,RPL22,RPS26,RPL12,RPS27,RPL5,RPL7A,RPS4X,RPL10A,RPL11,RPL13A,RPL34,RPS29,RPL14,RPS8,RPS14,RPL31,RPL23A,RPS18,RPL17,RPL6,RPL10,RPL29,RPL35A,RPL23,RPS20,RPS25,RPL28,RPL36,RPL27,RPS15,RPS19,RPS5,RPS10
GO:0006612	protein targeting to membrane	49	132	0.68	3.35e-13	9606.ENSP00000222247,9606.ENSP00000225430,9606.ENSP00000267884,9606.ENSP00000274242,9606.ENSP00000278572,9606.ENSP00000296674,9606.ENSP00000322159,9606.ENSP00000322419,9606.ENSP00000324205,9606.ENSP00000337722,9606.ENSP00000339095,9606.ENSP00000341885,9606.ENSP00000345957,9606.ENSP00000346015,9606.ENSP00000346050,9606.ENSP00000346088,9606.ENSP00000348849,9606.ENSP00000350386,9606.ENSP00000354739,…	RPL18A,RPL19,SRP14,RPL37,RPS3,RPS23,ATG4C,RPLP2,CHMP4A,ARL6,RPS7,RPS2,RPS21,RPL27A,RPS3A,RPL22,RPS26,CHM,RPL12,RPS27,RPL5,RPL7A,RPS4X,RPL10A,RPL11,RPL13A,RPL34,RPS29,RPL14,RPS8,RPS14,RPL31,RPL23A,RPS18,RPL17,RPL6,RPL10,RPL29,RPL35A,RPL23,RPS20,RPS25,RPL28,RPL36,RPL27,RPS15,RPS19,RPS5,RPS10
GO:0000184	nuclear-transcribed mRNA catabolic process, nonsense-mediated decay	46	118	0.7	5.24e-13	9606.ENSP00000220849,9606.ENSP00000222247,9606.ENSP00000225430,9606.ENSP00000274242,9606.ENSP00000278572,9606.ENSP00000296674,9606.ENSP00000313007,9606.ENSP00000322419,9606.ENSP00000339095,9606.ENSP00000341885,9606.ENSP00000345957,9606.ENSP00000346015,9606.ENSP00000346050,9606.ENSP00000346088,9606.ENSP00000348849,9606.ENSP00000354739,9606.ENSP00000357555,9606.ENSP00000359345,9606.ENSP00000361076,…	EIF3E,RPL18A,RPL19,RPL37,RPS3,RPS23,PABPC1,RPLP2,RPS7,RPS2,RPS21,RPL27A,RPS3A,RPL22,RPS26,RPL12,RPS27,RPL5,RPL7A,RPS4X,RPL10A,RPL11,RPL13A,RPL34,RPS29,RPL14,RPS8,RPS14,RPL31,RPL23A,RPS18,RPL17,RPL6,RPL10,RPL29,RPL35A,RPL23,RPS20,RPS25,RPL28,RPL36,RPL27,RPS15,RPS19,RPS5,RPS10
GO:0006413	translational initiation	48	142	0.64	7.95e-12	9606.ENSP00000220849,9606.ENSP00000222247,9606.ENSP00000225430,9606.ENSP00000248342,9606.ENSP00000274242,9606.ENSP00000278572,9606.ENSP00000296674,9606.ENSP00000313007,9606.ENSP00000322419,9606.ENSP00000339095,9606.ENSP00000341885,9606.ENSP00000345957,9606.ENSP00000346015,9606.ENSP00000346050,9606.ENSP00000346088,9606.ENSP00000348849,9606.ENSP00000354739,9606.ENSP00000357555,9606.ENSP00000359345,…	EIF3E,RPL18A,RPL19,EIF3K,RPL37,RPS3,RPS23,PABPC1,RPLP2,RPS7,RPS2,RPS21,RPL27A,RPS3A,RPL22,RPS26,RPL12,RPS27,RPL5,RPL7A,RPS4X,RPL10A,RPL11,EIF1AX,RPL13A,RPL34,RPS29,RPL14,RPS8,RPS14,RPL31,RPL23A,RPS18,RPL17,RPL6,RPL10,RPL29,RPL35A,RPL23,RPS20,RPS25,RPL28,RPL36,RPL27,RPS15,RPS19,RPS5,RPS10
GO:0044281	small molecule metabolic process	235	1779	0.23	1.63e-11	9606.ENSP00000004531,9606.ENSP00000005178,9606.ENSP00000009530,9606.ENSP00000040663,9606.ENSP00000215838,9606.ENSP00000216465,9606.ENSP00000217246,9606.ENSP00000219066,9606.ENSP00000219789,9606.ENSP00000220764,9606.ENSP00000226253,9606.ENSP00000228740,9606.ENSP00000229270,9606.ENSP00000229379,9606.ENSP00000230431,9606.ENSP00000230792,9606.ENSP00000231887,9606.ENSP00000233146,9606.ENSP00000237889,…	SLC7A2,PDK4,CD74,MRI1,TCN2,GSTZ1,MACROD2,NTHL1,CDIPT,DECR1,ALDOC,LTA4H,TPI1,COX6A1,DNPH1,NUDT12,EHHADH,MSH2,NDUFB3,CAT,GSTM2,UNG,IDUA,PMPCB,NDUFA2,HRSP12,MYH4,MACROD1,NT5E,RDH5,GNS,COX5B,GMPR,TTPA,GGH,SORL1,KHK,GUCY2C,LIAS,PTPLAD1,SCPEP1,SLC27A5,SRD5A3,PDCL3,NNT,PECR,PRKAR2B,CSAD,AK7,HEXA,NUDT7,NDUFB10,GALM,PNKD,AMT,SRD5A1,CYP39A1,HSD17B12,HNMT,MMAA,GPD1L,DDAH1,APP,ACAA2,MAN2B2,DCK,THTPA,ACSM3,AT…
GO:0006605	protein targeting	70	318	0.45	5.29e-10	9606.ENSP00000216366,9606.ENSP00000222247,9606.ENSP00000223136,9606.ENSP00000225430,9606.ENSP00000231887,9606.ENSP00000241052,9606.ENSP00000249269,9606.ENSP00000260197,9606.ENSP00000265322,9606.ENSP00000267884,9606.ENSP00000268533,9606.ENSP00000274242,9606.ENSP00000278572,9606.ENSP00000296674,9606.ENSP00000307697,9606.ENSP00000322159,9606.ENSP00000322419,9606.ENSP00000324205,9606.ENSP00000326219,…	AP4S1,RPL18A,FIS1,RPL19,EHHADH,CAT,PMPCB,SORL1,PECR,SRP14,NUDT7,RPL37,RPS3,RPS23,ACOX2,ATG4C,RPLP2,CHMP4A,DHRS4,ARL6,RPS7,RPS2,RPS21,RPL27A,RPS3A,RPL22,AGK,RPS26,CHM,TOMM7,RPL12,RPS27,RPL5,SCP2,RPL7A,RPS4X,RPL10A,RPL11,AMACR,DNAJC19,RPL13A,RPL34,RPS29,RPL14,RAB27A,RPS8,RPS14,RPL31,RPL23A,IDH1,RPS18,RPL17,RPL6,RPL10,CROT,RPL29,RPL35A,RPL23,NDUFA13,RPS20,EPHX2,GSTK1,RPS25,RPL28,RPL36,RPL27,RPS15,RP…
GO:0090150	establishment of protein localization to membrane	56	217	0.52	5.29e-10	9606.ENSP00000222247,9606.ENSP00000225430,9606.ENSP00000267884,9606.ENSP00000274242,9606.ENSP00000278572,9606.ENSP00000280571,9606.ENSP00000296674,9606.ENSP00000300935,9606.ENSP00000317469,9606.ENSP00000322159,9606.ENSP00000322419,9606.ENSP00000324205,9606.ENSP00000337722,9606.ENSP00000339095,9606.ENSP00000341885,9606.ENSP00000345957,9606.ENSP00000346015,9606.ENSP00000346050,9606.ENSP00000346088,…	RPL18A,RPL19,SRP14,RPL37,RPS3,RILPL2,RPS23,RAB8A,BBS1,ATG4C,RPLP2,CHMP4A,ARL6,RPS7,RPS2,RPS21,RPL27A,RPS3A,RPL22,AGK,RPS26,CHM,TOMM7,RPL12,RPS27,RPL5,RPL7A,RPS4X,RPL10A,RPL11,REEP2,RPL13A,RPL34,RPS29,RPL14,RPS8,RPS14,RPL31,RPL23A,RPS18,RPL17,RPL6,RPL10,RPL29,RPL35A,RPL23,NDUFA13,RPS20,RPS25,RPL28,RPL36,RPL27,RPS15,RPS19,RPS5,RPS10
GO:0043603	cellular amide metabolic process	115	732	0.31	1.49e-08	9606.ENSP00000156626,9606.ENSP00000216465,9606.ENSP00000220166,9606.ENSP00000220763,9606.ENSP00000220849,9606.ENSP00000222247,9606.ENSP00000225430,9606.ENSP00000225538,9606.ENSP00000228740,9606.ENSP00000241337,9606.ENSP00000248342,9606.ENSP00000260118,9606.ENSP00000261304,9606.ENSP00000268533,9606.ENSP00000270142,9606.ENSP00000274242,9606.ENSP00000274606,9606.ENSP00000278353,9606.ENSP00000278572,…	ST6GALNAC1,GSTZ1,CTSH,CPQ,EIF3E,RPL18A,RPL19,P2RX1,LTA4H,GSTM2,EIF3K,GGH,GALC,NUDT7,SOD1,RPL37,NHP2,HSD17B12,RPS3,ACSM3,ETHE1,RNPEP,BDH2,RPS23,TPP1,NDUFA7,HRASLS5,MRPL13,DEGS2,PDHB,QARS,PABPC1,GBA,ALDH5A1,TYMS,SCD5,ACSS1,BACE1,SHMT1,RPLP2,RPS27L,MRPL54,MRPL40,EEF1A1,RPS7,ACACB,RPS2,PPA2,GSTO2,RPS21,RPL27A,RPS3A,RPL22,AGK,RPS26,GM2A,MRPL24,RPL12,DARS2,RPS27,GSTO1,GSTM4,ELOVL3,RPL5,GSTA4,RPL7A,RPS4…
GO:0072657	protein localization to membrane	76	405	0.38	3.77e-08	9606.ENSP00000222247,9606.ENSP00000225430,9606.ENSP00000239666,9606.ENSP00000243662,9606.ENSP00000264399,9606.ENSP00000267884,9606.ENSP00000274242,9606.ENSP00000278572,9606.ENSP00000280571,9606.ENSP00000295225,9606.ENSP00000296674,9606.ENSP00000300935,9606.ENSP00000301050,9606.ENSP00000317469,9606.ENSP00000322159,9606.ENSP00000322419,9606.ENSP00000324205,9606.ENSP00000330485,9606.ENSP00000331831,…	RPL18A,RPL19,PDZD11,RAB38,PRKG2,SRP14,RPL37,RPS3,RILPL2,KCNIP3,RPS23,RAB8A,CACNB3,BBS1,ATG4C,RPLP2,CHMP4A,ZDHHC23,GAS6,BSG,ARL6,RPS7,RPS2,FERMT2,RPS21,RPL27A,RPS3A,RPL22,AGK,RPS26,CHM,TOMM7,EMP2,RPL12,RAB29,RPS27,RPL5,SCP2,RPL7A,RPS4X,RPL10A,RPL11,REEP2,AGRN,RPL13A,RPL34,FLOT2,RPS29,RPL14,RPS8,RPS14,CPE,RPL31,RPL23A,RPS18,RPL17,RPL6,RPL10,RPL29,RPL35A,CDK5,RPL23,NDUFA13,RPS20,BBIP1,RPS25,C2CD5,RP…
GO:1901575	organic substance catabolic process	202	1609	0.21	5.94e-08	9606.ENSP00000216465,9606.ENSP00000217740,9606.ENSP00000217961,9606.ENSP00000219066,9606.ENSP00000220166,9606.ENSP00000220763,9606.ENSP00000220764,9606.ENSP00000220849,9606.ENSP00000222247,9606.ENSP00000225430,9606.ENSP00000226253,9606.ENSP00000228740,9606.ENSP00000229270,9606.ENSP00000230431,9606.ENSP00000230582,9606.ENSP00000230792,9606.ENSP00000231887,9606.ENSP00000231948,9606.ENSP00000240617,…	GSTZ1,RNF125,STS,NTHL1,CTSH,CPQ,DECR1,EIF3E,RPL18A,RPL19,ALDOC,LTA4H,TPI1,DNPH1,PRSS16,NUDT12,EHHADH,CRBN,PLBD1,UNG,IDUA,NAPSA,HRSP12,DMGDH,RARRES3,NT5E,GNS,CCDC115,HINT2,KHK,GALC,SCPEP1,HACE1,SRD5A3,PECR,HEXA,NUDT7,GALM,PNKD,PLA1A,AMT,RPL37,SKP2,CYP39A1,RPS3,HNMT,GPD1L,DDAH1,ACAA2,MAN2B2,UBE2L6,AGL,RNPEP,FABP1,ADH5,BDH2,HMGB2,MAD2L1,RPS23,ALDH1A1,TPP1,GUSB,ACOX2,CTSF,PABPC1,GBA,ALDH5A1,ENPP4,BCK…
GO:0000956	nuclear-transcribed mRNA catabolic process	47	191	0.5	9.53e-08	9606.ENSP00000220849,9606.ENSP00000222247,9606.ENSP00000225430,9606.ENSP00000274242,9606.ENSP00000278572,9606.ENSP00000296674,9606.ENSP00000313007,9606.ENSP00000322419,9606.ENSP00000339095,9606.ENSP00000341885,9606.ENSP00000345957,9606.ENSP00000346015,9606.ENSP00000346050,9606.ENSP00000346088,9606.ENSP00000348849,9606.ENSP00000354739,9606.ENSP00000357555,9606.ENSP00000359345,9606.ENSP00000361076,…	EIF3E,RPL18A,RPL19,RPL37,RPS3,RPS23,PABPC1,RPLP2,RPS7,RPS2,RPS21,RPL27A,RPS3A,RPL22,RPS26,RPL12,RPS27,RPL5,RPL7A,RPS4X,RPL10A,RPL11,RPL13A,RPL34,RPS29,RPL14,RPS8,RPS14,RPL31,RPL23A,RPS18,RPL17,RPL6,LSM5,RPL10,RPL29,RPL35A,RPL23,RPS20,RPS25,RPL28,RPL36,RPL27,RPS15,RPS19,RPS5,RPS10
GO:0009056	catabolic process	224	1859	0.19	1.32e-07	9606.ENSP00000215743,9606.ENSP00000216465,9606.ENSP00000217740,9606.ENSP00000217961,9606.ENSP00000219066,9606.ENSP00000220166,9606.ENSP00000220763,9606.ENSP00000220764,9606.ENSP00000220849,9606.ENSP00000222247,9606.ENSP00000223136,9606.ENSP00000225430,9606.ENSP00000226253,9606.ENSP00000228740,9606.ENSP00000229270,9606.ENSP00000230431,9606.ENSP00000230582,9606.ENSP00000230792,9606.ENSP00000231887,…	MMP11,GSTZ1,RNF125,STS,NTHL1,CTSH,CPQ,DECR1,EIF3E,RPL18A,FIS1,RPL19,ALDOC,LTA4H,TPI1,DNPH1,PRSS16,NUDT12,EHHADH,CRBN,TMEM59,PLBD1,CAT,GSTM2,UNG,IDUA,NAPSA,HRSP12,DMGDH,RARRES3,NT5E,GNS,CCDC115,HINT2,KHK,GALC,SCPEP1,HACE1,VAMP8,SRD5A3,PECR,HEXA,NUDT7,GALM,PNKD,PLA1A,AMT,RPL37,SKP2,CYP39A1,RPS3,HNMT,GPD1L,DDAH1,ACAA2,MAN2B2,DRAM2,UBE2L6,AGL,RNPEP,FABP1,ADH5,BDH2,HMGB2,MAD2L1,RPS23,ALDH1A1,PRDX3,TPP…
GO:1901361	organic cyclic compound catabolic process	83	484	0.34	1.88e-07	9606.ENSP00000216465,9606.ENSP00000217961,9606.ENSP00000219066,9606.ENSP00000220849,9606.ENSP00000222247,9606.ENSP00000225430,9606.ENSP00000226253,9606.ENSP00000229270,9606.ENSP00000230431,9606.ENSP00000230792,9606.ENSP00000242576,9606.ENSP00000257770,9606.ENSP00000268533,9606.ENSP00000274242,9606.ENSP00000275016,9606.ENSP00000278572,9606.ENSP00000280097,9606.ENSP00000296503,9606.ENSP00000296674,…	GSTZ1,STS,NTHL1,EIF3E,RPL18A,RPL19,ALDOC,TPI1,DNPH1,NUDT12,UNG,NT5E,NUDT7,RPL37,CYP39A1,RPS3,HNMT,HMGB2,RPS23,PABPC1,ENPP4,RPLP2,RNASEH2B,RPS7,MAOA,RPS2,HMGB1,RPS21,RPL27A,RPS3A,RPL22,NEIL1,ENTPD2,RPS26,POX2,HSD17B11,RPL12,APOBEC3C,SMPDL3A,RPS27,RPL5,RPL7A,PGK1,UGT1A1,RPS4X,RPL10A,RPL11,MAOB,GALT,DUT,SETMAR,RPL13A,RPL34,RPS29,RPL14,RPS8,NUDT1,BLVRA,RPS14,RPL31,RPL23A,RPS18,RPL17,RPL6,LSM5,RPL10,R…
GO:0006518	peptide metabolic process	84	497	0.34	2.58e-07	9606.ENSP00000216465,9606.ENSP00000220166,9606.ENSP00000220763,9606.ENSP00000220849,9606.ENSP00000222247,9606.ENSP00000225430,9606.ENSP00000228740,9606.ENSP00000241337,9606.ENSP00000248342,9606.ENSP00000270142,9606.ENSP00000274242,9606.ENSP00000274606,9606.ENSP00000278572,9606.ENSP00000292147,9606.ENSP00000295640,9606.ENSP00000296424,9606.ENSP00000296674,9606.ENSP00000299427,9606.ENSP00000301457,…	GSTZ1,CTSH,CPQ,EIF3E,RPL18A,RPL19,LTA4H,GSTM2,EIF3K,SOD1,RPL37,NHP2,RPS3,ETHE1,RNPEP,BDH2,RPS23,TPP1,NDUFA7,MRPL13,QARS,PABPC1,ALDH5A1,BACE1,RPLP2,RPS27L,MRPL54,MRPL40,EEF1A1,RPS7,RPS2,PPA2,GSTO2,RPS21,RPL27A,RPS3A,RPL22,RPS26,MRPL24,RPL12,DARS2,RPS27,GSTO1,GSTM4,RPL5,GSTA4,RPL7A,RPS4X,RPL10A,RPL11,EIF1AX,GGT6,RPL13A,RPL34,RPS29,RPL14,RPS8,RPS14,CPE,RPL31,RPL23A,IDH1,RPS18,RPL17,ERAP2,RPL6,RPL10,…
GO:0072594	establishment of protein localization to organelle	72	396	0.37	2.76e-07	9606.ENSP00000222247,9606.ENSP00000223136,9606.ENSP00000225430,9606.ENSP00000231887,9606.ENSP00000241052,9606.ENSP00000249269,9606.ENSP00000256079,9606.ENSP00000260197,9606.ENSP00000262265,9606.ENSP00000265322,9606.ENSP00000267884,9606.ENSP00000268533,9606.ENSP00000274242,9606.ENSP00000278572,9606.ENSP00000296674,9606.ENSP00000307697,9606.ENSP00000322419,9606.ENSP00000324205,9606.ENSP00000326219,…	RPL18A,FIS1,RPL19,EHHADH,CAT,PMPCB,IPO8,SORL1,PIH1D1,PECR,SRP14,NUDT7,RPL37,RPS3,RPS23,ACOX2,RPLP2,CHMP4A,DHRS4,RPS7,RPS2,RPS21,RPL27A,RPS3A,RPL22,AGK,RPS26,TOMM7,RPL12,RPS27,NEURL1B,RPL5,SCP2,RPL7A,H2AFY2,RPS4X,RPL10A,RPL11,SYK,AMACR,DNAJC19,RPL13A,RPL34,RPS29,RPL14,RPS8,RPS14,RPL31,RPL23A,IDH1,RPS18,RPL17,RPL6,RPL10,CROT,RPL29,RPL35A,RPL23,NDUFA13,RPS20,EPHX2,GSTK1,RPS25,RPL28,SNUPN,RPL36,RPL27…
GO:0017144	drug metabolic process	97	622	0.3	4.46e-07	9606.ENSP00000004531,9606.ENSP00000040663,9606.ENSP00000215838,9606.ENSP00000216465,9606.ENSP00000220166,9606.ENSP00000226253,9606.ENSP00000229270,9606.ENSP00000229379,9606.ENSP00000233146,9606.ENSP00000237889,9606.ENSP00000241052,9606.ENSP00000247933,9606.ENSP00000249269,9606.ENSP00000252102,9606.ENSP00000254878,9606.ENSP00000255381,9606.ENSP00000257770,9606.ENSP00000258424,9606.ENSP00000260447,…	SLC7A2,MRI1,TCN2,GSTZ1,CTSH,ALDOC,TPI1,COX6A1,MSH2,NDUFB3,CAT,IDUA,PMPCB,NDUFA2,HRSP12,MYH4,NT5E,COX5B,GCHFR,LPCAT2,SLC27A5,NNT,PECR,NDUFB10,SOD1,AMT,SRD5A1,MMAA,THTPA,ETHE1,ATP5J2,ADH5,BDH2,ALDH1A1,PRDX3,ATP5L,NDUFA7,ATP5H,MAT2A,ATP5I,PDHB,ATP5S,UQCRH,GBAS,ALDH5A1,TYMS,ACSS1,SHMT1,ACPP,NDUFA12,NDUFA4,MAOA,ATP5C1,MT-ATP8,FMO4,PHGDH,ATP5F1,ELOVL3,SCP2,MAT1A,PGK1,UGT1A1,NDUFA8,MAOB,ESD,NDUFB6,GGT6,…
GO:0019439	aromatic compound catabolic process	78	453	0.35	4.46e-07	9606.ENSP00000216465,9606.ENSP00000219066,9606.ENSP00000220849,9606.ENSP00000222247,9606.ENSP00000225430,9606.ENSP00000226253,9606.ENSP00000229270,9606.ENSP00000230431,9606.ENSP00000230792,9606.ENSP00000242576,9606.ENSP00000257770,9606.ENSP00000268533,9606.ENSP00000274242,9606.ENSP00000278572,9606.ENSP00000280097,9606.ENSP00000296503,9606.ENSP00000296674,9606.ENSP00000313007,9606.ENSP00000318066,…	GSTZ1,NTHL1,EIF3E,RPL18A,RPL19,ALDOC,TPI1,DNPH1,NUDT12,UNG,NT5E,NUDT7,RPL37,RPS3,HNMT,HMGB2,RPS23,PABPC1,ENPP4,RPLP2,RNASEH2B,RPS7,MAOA,RPS2,HMGB1,RPS21,RPL27A,RPS3A,RPL22,NEIL1,ENTPD2,RPS26,RPL12,APOBEC3C,SMPDL3A,RPS27,RPL5,RPL7A,PGK1,UGT1A1,RPS4X,RPL10A,RPL11,MAOB,GALT,DUT,SETMAR,RPL13A,RPL34,RPS29,RPL14,RPS8,NUDT1,BLVRA,RPS14,RPL31,RPL23A,RPS18,RPL17,RPL6,LSM5,RPL10,RPL29,RPL35A,RPL23,RNASET2,…
GO:0055114	oxidation-reduction process	130	932	0.25	4.46e-07	9606.ENSP00000216465,9606.ENSP00000220764,9606.ENSP00000226253,9606.ENSP00000229270,9606.ENSP00000229379,9606.ENSP00000231887,9606.ENSP00000237889,9606.ENSP00000241052,9606.ENSP00000241337,9606.ENSP00000249269,9606.ENSP00000252102,9606.ENSP00000254090,9606.ENSP00000255189,9606.ENSP00000257895,9606.ENSP00000258424,9606.ENSP00000259727,9606.ENSP00000264228,9606.ENSP00000264663,9606.ENSP00000265322,…	GSTZ1,DECR1,ALDOC,TPI1,COX6A1,EHHADH,NDUFB3,CAT,GSTM2,PMPCB,NDUFA2,FMO5,DMGDH,RDH5,COX5B,GMPR,SRD5A3,NNT,PECR,NDUFB10,SOD1,SUMF1,SRD5A1,HIGD2A,CYP39A1,HSD17B12,GPD1L,ACAA2,DHRS1,ETHE1,ALKBH4,AGL,ADH5,BDH2,HPGD,HSD3B7,ALDH1A1,PRDX3,COX11,NDUFA7,DEGS2,PDHB,ACOX2,UQCRH,ALDH5A1,D2HGDH,SCD5,ACSS1,BCKDHB,CYBRD1,CHDH,COQ7,PPP1CA,DHRS4,NDUFA12,NDUFA4,MAOA,CYB5A,GSTO2,POX2,HSD17B11,F8,PTGS1,MT-CO3,SCCPDH,…
GO:1901566	organonitrogen compound biosynthetic process	174	1370	0.21	4.46e-07	9606.ENSP00000040663,9606.ENSP00000156626,9606.ENSP00000216465,9606.ENSP00000220849,9606.ENSP00000222247,9606.ENSP00000222725,9606.ENSP00000225430,9606.ENSP00000225538,9606.ENSP00000226253,9606.ENSP00000229270,9606.ENSP00000230792,9606.ENSP00000241337,9606.ENSP00000248342,9606.ENSP00000252318,9606.ENSP00000257770,9606.ENSP00000258424,9606.ENSP00000259727,9606.ENSP00000261170,9606.ENSP00000261799,…	MRI1,ST6GALNAC1,GSTZ1,EIF3E,RPL18A,LFNG,RPL19,P2RX1,ALDOC,TPI1,NUDT12,GSTM2,EIF3K,GALNT8,NT5E,COX5B,GMPR,GUCY2C,PDGFRB,PTPLAD1,LPCAT2,SRD5A3,PDCL3,ALG10,CSAD,HEXA,ASGR1,SLC44A3,RPL37,NHP2,PGAP2,HSD17B12,RPS3,MMAA,DCK,ATP5J2,PQLC3,BDH2,RPS23,PGAP3,ATP5L,NDUFA7,ATP5H,TK1,C1GALT1C1,ATP5I,MRPL13,DEGS2,PDHB,QARS,ATP5S,B3GNT1,PABPC1,GBAS,GBA,TYMS,SCD5,ACSS1,PRTFDC1,SHMT1,CHDH,ATG4C,RPLP2,BCAT2,NADSYN1,…
GO:0034655	nucleobase-containing compound catabolic process	70	394	0.36	8.42e-07	9606.ENSP00000219066,9606.ENSP00000220849,9606.ENSP00000222247,9606.ENSP00000225430,9606.ENSP00000226253,9606.ENSP00000229270,9606.ENSP00000230431,9606.ENSP00000230792,9606.ENSP00000242576,9606.ENSP00000257770,9606.ENSP00000268533,9606.ENSP00000274242,9606.ENSP00000278572,9606.ENSP00000296503,9606.ENSP00000296674,9606.ENSP00000313007,9606.ENSP00000318066,9606.ENSP00000322419,9606.ENSP00000337623,…	NTHL1,EIF3E,RPL18A,RPL19,ALDOC,TPI1,DNPH1,NUDT12,UNG,NT5E,NUDT7,RPL37,RPS3,HMGB2,RPS23,PABPC1,ENPP4,RPLP2,RNASEH2B,RPS7,RPS2,HMGB1,RPS21,RPL27A,RPS3A,RPL22,NEIL1,ENTPD2,RPS26,RPL12,APOBEC3C,SMPDL3A,RPS27,RPL5,RPL7A,PGK1,RPS4X,RPL10A,RPL11,GALT,DUT,SETMAR,RPL13A,RPL34,RPS29,RPL14,RPS8,NUDT1,RPS14,RPL31,RPL23A,RPS18,RPL17,RPL6,LSM5,RPL10,RPL29,RPL35A,RPL23,RNASET2,RPS20,RPS25,RPL28,RPL36,RPL27,RPS1…
GO:1901564	organonitrogen compound metabolic process	517	5281	0.1	1.12e-06	9606.ENSP00000004531,9606.ENSP00000005178,9606.ENSP00000040663,9606.ENSP00000156626,9606.ENSP00000206765,9606.ENSP00000215743,9606.ENSP00000215829,9606.ENSP00000215838,9606.ENSP00000216124,9606.ENSP00000216330,9606.ENSP00000216465,9606.ENSP00000216639,9606.ENSP00000217246,9606.ENSP00000217740,9606.ENSP00000217961,9606.ENSP00000218388,9606.ENSP00000219066,9606.ENSP00000219789,9606.ENSP00000220166,…	SLC7A2,PDK4,MRI1,ST6GALNAC1,TGM1,MMP11,SNRPD3,TCN2,ARSA,FKBP3,GSTZ1,VRK1,MACROD2,RNF125,STS,TIMP1,NTHL1,CDIPT,CTSH,CPQ,EIF3E,RPL18A,RAB3A,LFNG,CEP41,C5,RPL19,P2RX1,KAT2A,ALDOC,DTX4,LTA4H,TPI1,COX6A1,DNPH1,PRSS16,NUDT12,EHHADH,CRBN,MSH2,INO80B,IGFBP2,TMEM59,NDUFB3,PLBD1,CAT,GSTM2,UNG,ATP7B,C4BPB,RAB38,PI3,BMP4,CAPNS1,PRRG2,PYCARD,PHPT1,IDUA,EIF3K,PMPCB,NDUFA2,GALNT8,NAPSA,HRSP12,DMGDH,MYH4,MACROD1…
GO:0044248	cellular catabolic process	198	1646	0.19	1.13e-06	9606.ENSP00000216465,9606.ENSP00000217740,9606.ENSP00000219066,9606.ENSP00000220166,9606.ENSP00000220763,9606.ENSP00000220764,9606.ENSP00000220849,9606.ENSP00000222247,9606.ENSP00000223136,9606.ENSP00000225430,9606.ENSP00000226253,9606.ENSP00000228740,9606.ENSP00000229270,9606.ENSP00000230431,9606.ENSP00000230792,9606.ENSP00000231887,9606.ENSP00000231948,9606.ENSP00000234831,9606.ENSP00000241052,…	GSTZ1,RNF125,NTHL1,CTSH,CPQ,DECR1,EIF3E,RPL18A,FIS1,RPL19,ALDOC,LTA4H,TPI1,DNPH1,NUDT12,EHHADH,CRBN,TMEM59,CAT,GSTM2,UNG,IDUA,NAPSA,HRSP12,DMGDH,NT5E,GNS,CCDC115,GALC,SCPEP1,HACE1,VAMP8,SRD5A3,PECR,HEXA,NUDT7,PNKD,AMT,RPL37,SKP2,CYP39A1,RPS3,HNMT,DDAH1,ACAA2,DRAM2,UBE2L6,AGL,RNPEP,FABP1,ADH5,BDH2,HMGB2,MAD2L1,RPS23,PRDX3,TPP1,RAB8A,GUSB,FAM134B,ACOX2,CTSF,PABPC1,GBA,ALDH5A1,ENPP4,BCKDHB,SHMT1,CHD…
GO:0044270	cellular nitrogen compound catabolic process	75	441	0.34	1.13e-06	9606.ENSP00000219066,9606.ENSP00000220849,9606.ENSP00000222247,9606.ENSP00000225430,9606.ENSP00000226253,9606.ENSP00000229270,9606.ENSP00000230431,9606.ENSP00000230792,9606.ENSP00000242576,9606.ENSP00000255189,9606.ENSP00000257770,9606.ENSP00000268533,9606.ENSP00000274242,9606.ENSP00000278572,9606.ENSP00000280097,9606.ENSP00000296503,9606.ENSP00000296674,9606.ENSP00000313007,9606.ENSP00000318066,…	NTHL1,EIF3E,RPL18A,RPL19,ALDOC,TPI1,DNPH1,NUDT12,UNG,DMGDH,NT5E,NUDT7,RPL37,RPS3,HNMT,HMGB2,RPS23,PABPC1,ENPP4,RPLP2,RNASEH2B,RPS7,RPS2,HMGB1,RPS21,RPL27A,RPS3A,RPL22,NEIL1,ENTPD2,RPS26,RPL12,APOBEC3C,SMPDL3A,RPS27,RPL5,RPL7A,PGK1,UGT1A1,RPS4X,RPL10A,RPL11,GALT,DUT,SETMAR,RPL13A,RPL34,RPS29,RPL14,RPS8,NUDT1,BLVRA,TST,RPS14,RPL31,RPL23A,RPS18,RPL17,RPL6,LSM5,RPL10,RPL29,RPL35A,RPL23,RNASET2,RPS20,…
GO:0043604	amide biosynthetic process	81	495	0.32	1.2e-06	9606.ENSP00000156626,9606.ENSP00000220849,9606.ENSP00000222247,9606.ENSP00000225430,9606.ENSP00000225538,9606.ENSP00000248342,9606.ENSP00000274242,9606.ENSP00000274606,9606.ENSP00000278353,9606.ENSP00000278572,9606.ENSP00000296424,9606.ENSP00000296674,9606.ENSP00000301457,9606.ENSP00000306548,9606.ENSP00000307126,9606.ENSP00000307241,9606.ENSP00000307567,9606.ENSP00000313007,9606.ENSP00000314508,…	ST6GALNAC1,EIF3E,RPL18A,RPL19,P2RX1,EIF3K,RPL37,NHP2,HSD17B12,RPS3,BDH2,RPS23,NDUFA7,MRPL13,DEGS2,PDHB,QARS,PABPC1,GBA,SCD5,ACSS1,RPLP2,RPS27L,MRPL54,MRPL40,EEF1A1,RPS7,ACACB,RPS2,PPA2,RPS21,RPL27A,RPS3A,RPL22,AGK,RPS26,MRPL24,RPL12,DARS2,RPS27,ELOVL3,RPL5,RPL7A,RPS4X,RPL10A,RPL11,ACSL6,EIF1AX,FAM57B,GGT6,RPL13A,DHFRL1,RPL34,RPS29,RPL14,RPS8,RPS14,RPL31,RPL23A,RPS18,PPT1,DHFR,RPL17,CPS1,RPL6,RPL1…
GO:0019752	carboxylic acid metabolic process	119	854	0.25	1.7e-06	9606.ENSP00000004531,9606.ENSP00000009530,9606.ENSP00000040663,9606.ENSP00000216465,9606.ENSP00000220764,9606.ENSP00000226253,9606.ENSP00000228740,9606.ENSP00000229270,9606.ENSP00000231887,9606.ENSP00000241337,9606.ENSP00000247933,9606.ENSP00000254878,9606.ENSP00000260118,9606.ENSP00000261434,9606.ENSP00000261875,9606.ENSP00000262288,9606.ENSP00000263093,9606.ENSP00000264663,9606.ENSP00000265322,…	SLC7A2,CD74,MRI1,GSTZ1,DECR1,ALDOC,LTA4H,TPI1,EHHADH,GSTM2,IDUA,HRSP12,GGH,LIAS,PTPLAD1,SCPEP1,SLC27A5,NNT,PECR,PRKAR2B,CSAD,HEXA,NUDT7,PNKD,AMT,CYP39A1,HSD17B12,HNMT,DDAH1,ACAA2,ACSM3,BDH2,HPGD,HSD3B7,GUSB,PDHB,QARS,ACOX2,ARV1,ALDH5A1,D2HGDH,TYMS,SCD5,ACSS1,BCKDHB,SHMT1,BCAT2,THNSL2,BSG,ACACB,CYB5A,PPA2,GSTO2,POX2,AIG1,HIBCH,PTGS1,DARS2,NR5A2,ECHS1,ACADSB,PHGDH,GSTO1,GSTM4,ELOVL3,ACADM,CYP2J2,SC…
GO:0044282	small molecule catabolic process	68	388	0.35	1.84e-06	9606.ENSP00000216465,9606.ENSP00000220764,9606.ENSP00000226253,9606.ENSP00000229270,9606.ENSP00000231887,9606.ENSP00000247933,9606.ENSP00000254878,9606.ENSP00000257770,9606.ENSP00000260599,9606.ENSP00000264228,9606.ENSP00000265322,9606.ENSP00000268097,9606.ENSP00000268533,9606.ENSP00000272252,9606.ENSP00000273077,9606.ENSP00000273588,9606.ENSP00000275016,9606.ENSP00000280097,9606.ENSP00000284031,…	GSTZ1,DECR1,ALDOC,TPI1,EHHADH,IDUA,HRSP12,NT5E,KHK,SRD5A3,PECR,HEXA,NUDT7,GALM,PNKD,AMT,CYP39A1,HNMT,DDAH1,ACAA2,ADH5,BDH2,ALDH1A1,GUSB,ACOX2,ALDH5A1,ENPP4,BCKDHB,SHMT1,BCAT2,THNSL2,ENTPD2,POX2,AIG1,HIBCH,APOBEC3C,ECHS1,ACADSB,ACADM,SCP2,ECHDC2,MAT1A,LPIN3,PGK1,IDNK,ESD,GALT,AMACR,BDH1,CPT1C,HMMR,CEMIP,DAK,SULT1A1,NUDT1,TST,ALDH7A1,PCYOX1,GLYCTK,AMDHD2,CROT,IVD,PCCB,TRERF1,PAH,CYP4F12,HYKK,NUDT18
GO:0046700	heterocycle catabolic process	74	440	0.34	1.84e-06	9606.ENSP00000219066,9606.ENSP00000220849,9606.ENSP00000222247,9606.ENSP00000225430,9606.ENSP00000226253,9606.ENSP00000229270,9606.ENSP00000230431,9606.ENSP00000230792,9606.ENSP00000242576,9606.ENSP00000257770,9606.ENSP00000268533,9606.ENSP00000274242,9606.ENSP00000278572,9606.ENSP00000280097,9606.ENSP00000296503,9606.ENSP00000296674,9606.ENSP00000313007,9606.ENSP00000318066,9606.ENSP00000322419,…	NTHL1,EIF3E,RPL18A,RPL19,ALDOC,TPI1,DNPH1,NUDT12,UNG,NT5E,NUDT7,RPL37,RPS3,HNMT,HMGB2,RPS23,PABPC1,ENPP4,RPLP2,RNASEH2B,RPS7,RPS2,HMGB1,RPS21,RPL27A,RPS3A,RPL22,NEIL1,ENTPD2,RPS26,POX2,RPL12,APOBEC3C,SMPDL3A,RPS27,RPL5,RPL7A,PGK1,UGT1A1,RPS4X,RPL10A,RPL11,GALT,DUT,SETMAR,RPL13A,RPL34,RPS29,RPL14,RPS8,NUDT1,BLVRA,RPS14,RPL31,RPL23A,RPS18,RPL17,RPL6,LSM5,RPL10,RPL29,RPL35A,RPL23,RNASET2,RPS20,RPS25…
GO:0006401	RNA catabolic process	49	237	0.43	2.62e-06	9606.ENSP00000220849,9606.ENSP00000222247,9606.ENSP00000225430,9606.ENSP00000274242,9606.ENSP00000278572,9606.ENSP00000296674,9606.ENSP00000313007,9606.ENSP00000322419,9606.ENSP00000337623,9606.ENSP00000339095,9606.ENSP00000341885,9606.ENSP00000345957,9606.ENSP00000346015,9606.ENSP00000346050,9606.ENSP00000346088,9606.ENSP00000348849,9606.ENSP00000354739,9606.ENSP00000357555,9606.ENSP00000359345,…	EIF3E,RPL18A,RPL19,RPL37,RPS3,RPS23,PABPC1,RPLP2,RNASEH2B,RPS7,RPS2,RPS21,RPL27A,RPS3A,RPL22,RPS26,RPL12,RPS27,RPL5,RPL7A,RPS4X,RPL10A,RPL11,RPL13A,RPL34,RPS29,RPL14,RPS8,RPS14,RPL31,RPL23A,RPS18,RPL17,RPL6,LSM5,RPL10,RPL29,RPL35A,RPL23,RNASET2,RPS20,RPS25,RPL28,RPL36,RPL27,RPS15,RPS19,RPS5,RPS10
GO:0043436	oxoacid metabolic process	125	943	0.23	8.23e-06	9606.ENSP00000004531,9606.ENSP00000009530,9606.ENSP00000040663,9606.ENSP00000216465,9606.ENSP00000220764,9606.ENSP00000226253,9606.ENSP00000228740,9606.ENSP00000229270,9606.ENSP00000231887,9606.ENSP00000241337,9606.ENSP00000247933,9606.ENSP00000254878,9606.ENSP00000258145,9606.ENSP00000260118,9606.ENSP00000261434,9606.ENSP00000261875,9606.ENSP00000262288,9606.ENSP00000263093,9606.ENSP00000264663,…	SLC7A2,CD74,MRI1,GSTZ1,DECR1,ALDOC,LTA4H,TPI1,EHHADH,GSTM2,IDUA,HRSP12,GNS,GGH,LIAS,PTPLAD1,SCPEP1,SLC27A5,NNT,PECR,PRKAR2B,CSAD,HEXA,NUDT7,PNKD,AMT,CYP39A1,HSD17B12,HNMT,DDAH1,ACAA2,ACSM3,BDH2,HPGD,HSD3B7,GUSB,PDHB,QARS,ACOX2,B3GNT1,ARV1,ALDH5A1,D2HGDH,TYMS,SCD5,ACSS1,BCKDHB,SHMT1,BCAT2,THNSL2,BSG,ACACB,CYB5A,PPA2,GSTO2,POX2,AIG1,HIBCH,PTGS1,DARS2,NR5A2,ECHS1,ACADSB,PHGDH,GSTO1,GSTM4,ELOVL3,ACAD…
GO:0006091	generation of precursor metabolites and energy	66	400	0.33	1.96e-05	9606.ENSP00000226253,9606.ENSP00000229270,9606.ENSP00000229379,9606.ENSP00000233146,9606.ENSP00000237889,9606.ENSP00000241052,9606.ENSP00000249269,9606.ENSP00000252102,9606.ENSP00000255189,9606.ENSP00000258424,9606.ENSP00000261070,9606.ENSP00000263093,9606.ENSP00000264663,9606.ENSP00000268668,9606.ENSP00000274192,9606.ENSP00000288014,9606.ENSP00000292475,9606.ENSP00000294724,9606.ENSP00000296412,…	ALDOC,TPI1,COX6A1,MSH2,NDUFB3,CAT,PMPCB,NDUFA2,DMGDH,COX5B,COX17,SLC27A5,NNT,NDUFB10,SRD5A1,THTPA,ATP5J2,AGL,ADH5,BDH2,ALDH1A1,COX11,ATP5L,NDUFA7,ATP5H,ATP5I,PDHB,UQCRH,GBAS,ALDH5A1,D2HGDH,ACSS1,PPP1CA,NDUFA12,ATPIF1,NDUFA4,CYB5A,ATP5C1,MT-CO3,MT-ATP8,PHGDH,ATP5F1,PGK1,NDUFA8,MAOB,NDUFB6,GYG2,LYRM5,BDH1,NDUFA4L2,SUCLG1,ATP5A1,IDH1,MTFR2,AK9,CROT,NDUFA5,CHCHD10,COX7C,COX6C,UQCRB,MDH1,BLOC1S1,GIPR,…
[truncated: 99 more rows]

## Sheet: 1st_2000_Genes_KEGG_Down
Supplementary table S5: Results from the Gene Ontology (GO) analysis in the category for biological process complete (GObp) and Pathway Enrichment (KEGG pathways) in BCoV infected cells at 72 hpi.
#term ID	term description	observed gene count	background gene count	strength	false discovery rate	matching proteins in your network (IDs)	matching proteins in your network (labels)
[truncated: 15 more rows]
