# Supplementary material for: Gene expression profile of HCT-8 cells following single or co-infections with Cryptosporidium parvum and bovine coronavirus
Source: Research Square preprint supplement (doi:10.21203/rs.3.rs-2673942/v1), 2023-03-23
Supplement: Supplementary file 3 [file 42d2ceddf46aa1c173fd3068.xlsx]

## Sheet: Only_Coinfection_24h
Supplementary Table S3: Differentially expressed genes (DEGs) mapped to Homo sapiens found in each of the comparisons analysed in the present work and included in the Venn diagrams.
78 elements included exclusively in "Coinfection at 24h
MAP3K14
PGM3
USP36
DNAJC25,DNAJC25-GNG10
SLC2A3
MAPK6
XBP1
ESRP1
NFKBIB
FKBP14
MAP3K8
IL10RA
PRDM4
CEP85L
AMOTL2
DNAJC27
CLIP4
MSH6
UAP1
PTBP2
TNFAIP3
SGK1
NR4A3
DUSP4
PARD6B
FOSB
SESN2
VIMP
BHLHE40
IER3
THUMPD2
DUSP5
TDG
CDR2
OSGIN1
EPHA2
TUFT1
MCL1
DUSP10
PLK2
CREB5
NRBF2
DCUN1D2
UBC
TSC22D3
MPZL3
CCNYL1
ZC3H12A
PDP1
PIGA
SERTAD3
ZBTB49
RP11-443P15.2
OVOL1
LONRF3
FOSL1
TSPYL2
HIST1H1B
MAFF
SPRY4
PEAR1
ZNF527
ZNF699
YRDC
HRH1
HIST1H2AG
ZNF165
RN7SK
HSP90B3P
RAB12
ZSCAN12P1
RP11-61N20.3
LARP1BP1
RP5-1011O1.2
AC093106.5
RP11-443N24.1
DNAJC8P1
RP5-850E9.3

## Sheet: Only_virus_24h
Supplementary Table S3: Differentially expressed genes (DEGs) mapped to Homo sapiens found in each of the comparisons analysed in the present work and included in the Venn diagrams.
15 elements included exclusively in "Virus at 24h
VEGFA
EGR1
NR4A1
ZFP36
DUSP2
IER2
FAM84A
E2F6
FOS
PCP4
CRELD2
GPR89B
SEPT7P2
ADH1C
RP11-571L19.8

## Sheet: Only_Crypto_24h
Supplementary Table S3: Differentially expressed genes (DEGs) mapped to Homo sapiens found in each of the comparisons analysed in the present work and included in the Venn diagrams.
26 elements included exclusively in "Crypto at 24h
PAQR6
KLHL11
MAP6D1
MT-ND6
MT-CO2
MT-CYB
MT-ND2
MT-ND5
MT-CO1
MT-ND3
MT-ND4
MT-ND1
MT-ATP6
MT-CO3
MT-ND4L
GSTM2
MTND2P28
MT-ATP8
HIST1H2AM
hsa-mir-6723
NEAT1
MTND4P12
MTATP6P1
CTD-2651B20.3
RP11-473M20.7
RP6-99M1.2

## Sheet: All_3_infections_24h
Supplementary Table S3: Differentially expressed genes (DEGs) mapped to Homo sapiens found in each of the comparisons analysed in the present work and included in the Venn diagrams.
2 common elements in "Coinfection, virus and crypto_24h
EGR2
JUN

## Sheet: Only_Coinfection_Virus_24h
Supplementary Table S3: Differentially expressed genes (DEGs) mapped to Homo sapiens found in each of the comparisons analysed in the present work and included in the Venn diagrams.
68 common elements in "Coinfection and virus_24h
TNFRSF12A
HERPUD1
MXD1
KLF6
RASSF1
PTGS2
EDN1
CXCL2
PPP1R15A
VCPKMT
DNAJC3
FAM46A
HBEGF
ARRDC3
IL1A
COQ10B
RND3
ERRFI1
GADD45A
CTGF
DUSP1
EREG
GPCPD1
DNAJB9
GDF15
ZMYM5
IRAK2
REG4
LARP1B
DUSP6
SIK1
CYR61
RGS16
RHOB
CSRNP1
MANF
EAF2
SLC25A25
ANKRD1
ZC3H12C
SEC24D
LURAP1L
XDH
ATF3
TIPARP
CXCL3
TCP11L2
MIS12
DDIT4
CDKN2AIP
ZBTB43
IL8
TM4SF1
KRT20
EIF2AK3
NABP1
FUT1
DDIT3
ZFAND2A
YOD1
INSIG1
MIR22HG
TSC22D2
SERTAD1
FICD
FBXO16
MRPS31P5
RP11-383J24.1

## Sheet: Only_Coinfection_Crypto_24h
Supplementary Table S3: Differentially expressed genes (DEGs) mapped to Homo sapiens found in each of the comparisons analysed in the present work and included in the Venn diagrams.
2 common elements in "Coinfection and crypto in 24h
ZNF460
SNHG7

## Sheet: Only_virus_crypto_24h
Supplementary Table S3: Differentially expressed genes (DEGs) mapped to Homo sapiens found in each of the comparisons analysed in the present work and included in the Venn diagrams.
1 common element in "Virus and crypto_24h
MIR24-2

## Sheet: All_3_infections_72h
Supplementary Table S3: Differentially expressed genes (DEGs) mapped to Homo sapiens found in each of the comparisons analysed in the present work and included in the Venn diagrams.
34 common elements in "coinfection, virus, crypto at 72h
KLF6
GADD45B
BET1
GOLT1B
HBEGF
CLK4
CRBN
RGS2
CTGF
IRF2BPL
DUSP1
EGR1
EGR2
CENPK
FOSB
ID1
ZFP36
IER3
DUSP5
NEIL1
SIK1
CYR61
RHOB
BTG2
IER2
IGF2
COMMD8
FOS
TRIB1
ZNF77
JUN
AP1S2
SOWAHC
C5orf54

## Sheet: Only_Coinfection_72h
Supplementary Table S3: Differentially expressed genes (DEGs) mapped to Homo sapiens found in each of the comparisons analysed in the present work and included in the Venn diagrams.
811 elements included exclusively in "coinfection	72h":
ARHGAP33
ALDH3B1
PAF1
VPS41
ARHGAP44
BAIAP3
NOX1
MTMR11
CXorf56
HMGB3
CHPF2
CLEC16A
LIMA1
BCAR1
KIF1B
ATP9A
EIF2AK2
RNF4
HIPK2
IPO5
OAT
NTN1
PRR11
WDR1
FAM50A
ALDH3A2
SIDT1
CLASP1
SEMA3A
ZNF37A
ACTB
TRAF4
DNAJC10
USP33
TNS1
LRRC16A
SRCAP
NDC80
BZW1
RNF13
LYRM2
GSTP1
SF3B2
RFX2
CNOT3
SLC4A11
LZTS3
FUS
RBM41
MRPS33
GEMIN2
DFNB31
PSMD8
MKNK2
P2RX6
EIF3L
CENPM
03-Sep
TOM1
GSKIP
CINP
PFDN4
PQBP1
FNDC3A
SLC7A5
STX4
TRIP4
NIPAL2
EMC2
ZC2HC1A
SGTA
PLEKHA8
CASP2
PSMA2
TFAM
TADA2A
2022-09-04
VAT1
YWHAE
OCIAD1
EHD1
CBL
ARPC3
OAS3
NUP107
CNOT2
KRR1
RAB35
TDP2
PPARD
UNC93A
MDFI
GMDS
TTK
SLC29A1
DAP
MRPS27
SUB1
CPEB4
NIT2
RNF7
ECT2
MAPKAPK3
TNNC1
PPM1G
DCAF17
ORC4
HDAC1
CAPZA1
SRM
APH1A
DPH5
MYL12B
WDR35
GDA
SET
KBTBD7
NR2C1
FABP3
ODF2L
PMS2
ZC3H13
C12orf44
MORF4L2
TTC21B
LYPD3
SIRT5
MT1G
06-Sep
PSD4
C3
UBA2
COX6B1
NR1D1
MACF1
POT1
PRKRIP1
FLNC
AP1M2
SLC6A8
TBC1D5
FCRLA
PTCD3
MRPL35
GPALPP1
PTGFRN
SLC43A3
PSAT1
ORC3
CDK4
DNAJB2
DRAM1
MTHFS
MRPL47
07-Mar
DNAJC1
LRRC8A
ANP32B
NOV
RNF38
TAF8
YAP1
NUSAP1
DBT
HADHB
ACTR2
RPS24
11-Sep
CENPE
ETNK1
KLRG1
ETFA
FANCI
TP53
CBX8
MBD1
DPP9
ATHL1
SCYL1
WTIP
CTU1
ARHGEF19
DMRTA2
SERBP1
MGST3
SNX27
ANP32E
GABPB2
EPHX1
PHIP
ABRACL
DYNLT1
C7orf26
AC004453.8
TMEM209
EBP
OGT
AK3
REXO4
ASB6
FAM171A1
TCF7L2
LIN7C
HYOU1
DOCK1
RAD9B
ACAD8
PTPN14
ANKRD22
SCOC
CETN3
TRIP12
MCOLN2
GDPD1
C6orf57
TRIM11
ATP5J
SKA1
FBXL18
C9orf85
MED7
ANKRD9
SFR1
C14orf2
FBRS
NECAP2
TAB3
LDLRAP1
WASF2
COPG2
RNF166
NAE1
PDE9A
ST6GALNAC6
SHC1
ZFPL1
PDZK1IP1
FUBP1
LRRIQ3
BPNT1
BROX
DUSP19
INHBB
MRPS18C
HIPK1
ATP1A1
SERPINI1
COX18
ZNF513
KIF15
DTX3L
SMIM12
KLF15
BAP1
PRKCD
CAMP
GPX8
RICTOR
08-Sep
PTTG1
SPIDR
OSR2
PSIP1
HGSNAT
RPL36AL
QSOX2
SNAPC4
SERPINB8
FAM96B
PPIB
TAC3
MVD
CYP2S1
ZNF526
DAPK3
RILP
ANGPTL4
CDK2AP2
ZNF598
RAB26
VPS37C
SNRNP48
AHCYL1
TMEM129
UBE2V2
RAB24
PLEKHA2
ZNF768
RPS9
ZNF672
TMEM126A
HOPX
KLF11
ZNF738
PDP2
RHOD
03-Mar
SOCS7
ZBTB4
ZCCHC12
SLC29A2
BRMS1
C3orf33
RPS6KB2
BAIAP2
AIM1L
SPHK1
SLC35G1
RPL37AP8
MUC20
SLC38A9
FAM109B
PDDC1
TGIF1
PARD6G
EPM2AIP1
RMI1
TMEM107
CYC1
FARSA
SAMD4B
EIF2S3L
SKIDA1
ZNF572
POLR2A
HSP90AA6P
LSM10
IBA57
SNRPE
MRPL41
CEP97
LIMK2
URAD
PRR14L
ZNRF3
OAF
NCMAP
INTS5
DDX51
METTL7A
POMK
GNG2
BTN3A2
HPDL
TMSB4XP8
DNAH17
HES4
NKAIN2
AKR1C3
NIF3L1
STK31
WDR5
SPTSSB
C17orf59
ARID5A
CASP4
HIST1H4C
KIAA1671
UAP1L1
S100A10
HIST1H2BF
SGTB
MRPL42
MGEA5
SH3BGRL2
MT-ND6
MT-CO2
MT-CYB
MT-ND5
SELM
CES1
MT-ND1
CIPC
CAPZA2
SMG5
GDI1
AKT1S1
MROH6
ZBTB48
FBXO48
E2F4
MT1A
TMSB4X
SERPINB5
MT-ND4L
COX20P1
HNRNPA3P6
AC104306.1
KCTD11
ZNF891
C19orf38
RP6-159A1.2
APOL6
KRT8P45
HNRNPA1P48
AC069213.1
MTND2P28
UQCRFS1P1
RPL37AP1
RP3-327A19.5
SEC63P1
HCG11
SAR1P1
LINC01125
RPL41
FTH1P5
PA2G4P4
RP11-318C24.1
RP11-175O19.4
RP11-144L1.8
MCTS1
DYNLT3P1
RP11-512F24.1
RPS11P5
LINC00342
HIST1H2AM
RP11-54D18.4
RP11-395P17.3
TSPY26P
RP11-678B3.2
RP13-444K19.1
UBE2L5P
FTH1P11
RP11-459A10.1
RP11-108M9.4
TXNDC5
CDRT4
RP11-254B13.1
RP11-64D22.2
RP1-89D4.1
PLEKHO2
AP5Z1
WWP1P1
N4BP2L2
CTD-2547L16.1
NEAT1
RP11-253E3.3
CTBP2P4
MPV17L2
RP11-60I3.5
LINC00641
TUBB3
RP11-624L4.1
LINC00657
RP11-48B3.4
RP11-57H14.4
RP11-96K19.4
CTC-523E23.1
TCF24
RP11-333E1.1
DLGAP1-AS2
CTD-2206N4.4
SNORA76
RP1-178F10.3
RP11-15H20.5
RP11-2B6.2
RP4-635E18.8
RP11-464F9.22
RP11-6J24.6
RP11-212P7.2
RP11-339B21.14
RP11-314B1.2
TNC
ASB9
ACOT2
ADCY7
CLSTN3
ETAA1
ZNF19
RLTPR
ZNF449
MST1
C11orf54
ZNF624
SP5
GNL1
AC093724.2
OSER1-AS1
NME1
CTD-2015H6.3
RP11-110I1.12
RP11-434C1.3
AGA
SUN2
LGALS8
TPST2
AKAP12
USP43
POC1A
TRAPPC2
ZFP2
RP11-510I6.2
BTF3P13
RP11-370B11.1
RNF7P1
RP11-103G8.2
RP11-121C2.2
SNORD3B-1
TBC1D2
SC5D
EHBP1
NUP85
TRIP10
C19orf12
CNTD1
RNU5B-1
ST13P5
PDCL3P4
CTD-2095E4.1
GATA6-AS1
RP11-265B8.5
ZNF384
KCNMB4
SLX4IP
CACHD1
TM4SF4
HNRNPA3
LEMD1
WASF4P
SACM1L
RP11-15H20.6
NIFKP1
COX10-AS1
AC004257.3
GAS6-AS2
IFT80
RPS6KA2
FAM81A
TTC14
UVSSA
INPP5D
APEX2
ZNF212
RPL37A
DENND1B
LGMNP1
AC007255.8
CHURC1
PNPO
POLE4
KIFC3
NOSTRIN
UGT1A6
SDHAP3
C6orf1
WDR52
PSMD10P2
KIAA0556
ERC1
ENKD1
KIF1A
GLUL
MFGE8
SLC16A14
SGOL2
PHBP3
RP11-340I6.6
RP11-138J23.1
XRCC5
MLF2
BPHL
KLF13
RPA2P2
ACAA1
EIF4G1
PLAC1
FAM19A2
DENND6B
AHCTF1P1
RP11-486A14.1
ATXN3
PHF1
SPINK4
KLHDC10
EPG5
RP11-343H5.4
NPM1P5
PHF14
FBXO4
BBS5
KIF27
RP4-545K15.5
RP3-462E2.5
CLASRP
KSR1
TIAM1
CRELD1
AGO2
TMEM99
HIST1H2AE
CEP63
MYLK
ROPN1B
VPS72
COQ2
RGP1
AKAP6
DBF4B
PSCA
PTPRS
BAHD1
AP3D1
SRPK1
SEMA5A
CRHR1-IT1,RP11-105N13.4
LINC00894
MTAP
RP11-528A4.2
RP11-364M6.1
ENO2
ORC2
FCHO2
C5orf63
RP11-672L10.6
APOH
SMAD7
ZNF33A
RP11-564D11.3
WDFY2
LARP6
SPAG4
GCN1L1
NUP43
TOMM40
EIF2S3
SEPT7P7
CTA-211A9.5
RP11-452L6.1
TRMT13
C11orf84
RIC8A
LCA5L
RHEB
RFWD2
CSNK1G1
LINC01106
CEACAM5
RP11-38P22.2
SPRYD4
ACTL6A
DHRS4L2
ARRDC1
RP11-460C6.1
DNAL1
TDGF1P3
SLCO4A1
STK11IP
yR211F11.2
RRP1
KRT8P10
ZNF862
COA1
CTD-2192J16.22
PRKCZ
TTC39B
GNPDA2
RAD54L
HOXA3
PWP2
BOLA3
NPM1
CTC-523E23.11
ASB16-AS1
WDR19
GPHN
RBBP4P4
AC003665.1
ENOSF1
ZNF563
CASC5
PLCB1
AC002056.3
PIAS1
MRPL14
SGK2
RP1-179N16.6
WBP11P1
ZNF780A
GLS2
C4orf36
GRAMD1A
RPL18AP3
KIF4B
DPH6
NOP16
TMA7
PARP11
DPH1
CCDC30
KIF22
RPL17,RPL17-C18orf32
LINC00116
C6orf136
LINC00963
TMCO6
MT-ATP6
RP11-255J3.3
SGCB
TTC8
LINC01123
PTGES3P3
GET4
PPP1R3E
COL4A2
ZNF480
MTERFD3
C6orf226
LL0XNC01-7P3.1
TMEM67
NUPL2
UBE2HP1
SBNO2
MT2P1
SNHG8
WDR48
NFKBID
MBNL1
TFF3
NUDT14
RLN2
PLEKHA8P1
RGL3
LINC00476
NUP62CL
PTGR2
NMNAT3
RP11-160O5.1
PIGF
CCDC77
NUDT8
AC069287.1
C4orf21
CEACAM1
ACER2
KLF7
TMEM185A
HIST4H4
RNF170
PHYKPL
PIN4P1
ZDHHC2
SARS2
AC016292.3
CEP112
SNX8
MTBP
RAPGEF3
HLA-DPA1
RP11-44N21.1
RPGR
SHANK2
JADE1
DTD2
KLC4
CBX3P2
UPF3A
AC104651.1
ZNF701
CAB39L
GSTT2
BDKRB1
EI24
STAU2
FXN
B3GALNT1
DNASE1
RP11-378J18.3
RIPK3
CNPPD1
ZNF219
KDELR3
FUNDC2P2
RAD51D
GCDH
NLGN3
AC005532.5
RP11-467J12.4
LY6D
SPC25
ATRIP
COMMD5
Z83840.1
RRM1
RPL31P2
UBE2M
CTD-2228K2.5
TAGLN
SEC31B
TIGD1
RP5-902P8.10
EIF4E
TMEM69
TRANK1
CTD-2574D22.2
CTD-2124B8.2
RP11-349A22.5
MYH10
ANKRD20A5P
RPS14P3
MPHOSPH9
POT1-AS1
AC124861.1
C16orf62
MUTYH
CUL5
ZNF320
AC123768.4
CCNE2
GOLGA8A
HMGN3-AS1
EME1

## Sheet: Only_Virus_72h
Supplementary Table S3: Differentially expressed genes (DEGs) mapped to Homo sapiens found in each of the comparisons analysed in the present work and included in the Venn diagrams.
808 elements included exclusively in "Virus	72h":
RPAP3
ZNF195
UBE3C
MLXIPL
FUZ
RNF14
SRCIN1
SLC38A5
CPS1
AKAP11
CD44
SLC39A9
GRN
PARP3
YTHDC2
TSPAN17
VAMP3
FOXN3
KCNQ1
ENTPD2
FOXC1
TAB2
LAMC2
SNRNP40
CS
BTBD1
ME1
FGFR2
NEO1
PDK3
PTPN3
EIF2B3
MGAT4A
ING3
MRPS34
TOP2B
CAPZB
PIAS2
MID2
RSBN1
STK17B
BCKDHB
GRHL2
APLP2
MYNN
MRPL28
PIR
ASAP3
SMOX
C20orf194
EBF4
DYNLL1
SNX5
ERP29
TGM1
EPB41L4B
BAMBI
SCD
MARCH2
PRODH
SEPT3
ARSA
CGRRF1
TMED8
CTSZ
NDUFAF5
ACTR5
MYL12A
MOSPD1
TIMP1
KLF5
TSC22D1
MAPK3
GDPD3
PARD6A
NDRG4
COTL1
PTOV1
AURKC
TIMM50
DYRK1B
APLP1
MEGF8
RPL18A
IQCE
EVX1
CYP3A5
DDX50
SEPT4
KPNB1
NPR3
TCERG1
DPYSL3
PDGFRB
SLC35F5
SF3B14
GPD2
SRSF7
SDC1
SFPQ
ZBTB17
MRPS15
TXNIP
RCN2
RAD23B
RBM25
DNMT3A
UFM1
SOCS2
RNF2
CCDC91
SRSF6
MED20
EFNB2
SEPT6
FOXA2
MCF2L
RHOT1
GNAZ
CHAC1
PRKCSH
ZNF557
C16orf13
C19orf66
RBM39
ZNF428
COX4I1
TNS4
CLUHP3
NUP210
UTP3
POLR3F
CDK8
AMPD3
EMP1
RINT1
MDFIC
KLHL36
TAF5L
TMBIM1
CHST12
TBRG4
2022-03-07
TXN
ST6GALNAC4
APTX
TMEM8B
RPS6
CMTR1
FLOT1
FAM8A1
MYO7A
ARRB1
CREBZF
GTF2B
ATAD1
TIMM23
PPIG
COX17
BBS7
2022-09-11
LMBR1L
PELI2
NAA30
TLE3
TGFB1I1
SCRN2
ZNF593
PSMA5
HDGF
GOLPH3L
PYCR2
SETD7
MDH2
UHRF2
MRRF
RPL7A
EIF4EBP2
MKI67
CAPN5
INTS4
MTA2
SOGA1
MPP7
CCT5
SRFBP1
ENAH
OXA1L
RMND1
CDK20
PCGF6
MAPK13
AASDH
TMEM164
SLC34A2
C12orf43
ELK4
EDA
DMTN
ADPGK
ZNF362
ZDHHC12
CRTC2
GMEB1
SCNN1D
C1orf74
FBXO41
FABP1
RPL9
ARHGEF3
WDR82
STARD4
KIAA1430
2022-09-08
KDM1B
STRBP
SLC16A9
REEP3
GHITM
TMEM41B
CCDC68
CDC42EP5
ZNF444
NDUFV1
ITFG3
ABCA3
SCARA3
ZSWIM1
FEM1B
CCDC126
MMGT1
TAPT1
SLC30A1
SOCS5
ZNF318
C20orf196
BSG
HINFP
MRP63
FAM86B3P
EHBP1L1
C1QTNF1
2022-03-03
LEMD3
SLC16A13
MSL2
PTDSS2
ATR
PARL
AGTRAP
RPS3AP5
CTD-2192J16.15
CTNNBIP1
ARMC10P1
TMEM52
TAF7
MRFAP1L1
AURKB
HTR1D
APOBEC3B
PHC1P1
D2HGDH
CMTR2
DHTKD1
TMEM45A
MRPS23
TNFSF15
PHLDA2
ZNF329
TRAPPC6B
C1orf116
CAMK1D
GAS6
SMDT1
PI4KAP2
RP11-347C12.2
KREMEN1
CMSS1
FOXO4
BRI3BP
MANEAL
SH3BGR
PSMD13
LAMP1
POLR1D
RPS23
ARAP1
TMEM232
AKR1C1
KCNJ11
TCEA1
HIST1H1C
TPRG1
NHS
SLC38A3
SUMO2
ZNF124
ZNF502
MRPL21
PARVA
RPS26
KIF13B
RPL12
VPS13A
MIER1
C9orf96
KIAA0753
CCDC162P
GPRIN2
GNB2L1
SNX2
MT1M
HMGB3P6
SCAF8
CRIP1
RP11-75L1.2
DDX47
RP6-218J18.2
TDPX2
IFI30
RP11-30P6.1
ISCA1P1
RPL5P18
AC092106.1
ST13P6
RP11-53M11.2
TERF1P5
AC013717.3
AKR1B15
ST13P19
LYPLA2P1
OST4
RPL35AP21
RPL4P5
RPL19P21
RPS23P8
PABPC1P3
HLA-K
AP006216.11
RP11-416K24.2
RPL3P4
ATG4AP1
RPL34P27
ERVH48-1
RPS4XP11
ZBTB22
VEZF1P1
EI24P2
RPSAP15
RP11-51L5.2
RPL5P23
SETP14
RPL3P9
RP11-392P7.1
RP11-14K2.1
RP11-436H11.1
MRPL33
RPL3P3
ST13P15
OSTCP1
CTB-47B8.1
CASC8
RP11-215G15.4
RP5-1009N12.1
NRBF2P4
SEPT10P1
CTB-158E9.2
RP11-195E2.4
RP11-382M14.1
KLRC4-KLRK1
RP11-424C20.2
RP11-320M2.1
RP11-641A6.9
RP11-350G24.2
DNAJC19P9
RP11-320A16.1
CTD-2267D19.3
RP11-690G19.3
CTD-2008P7.9
CTB-95D12.1
RP1-74M1.3
RP11-686O6.2
NOTCH3
SF3A1
COL1A1
STEAP3
TRPM6
NUDCD1
NOL11
ZNF7
ESAM
PARS2
C3orf17
RAET1E
RCCD1
CHST14
POLR1C
BPGM
VANGL1
TCEANC
CACYBPP2
ZNF433
RP11-393N4.2
AC011747.7
CTD-3105H18.13
PIK3R2
DHX32
ZC3HC1
SEC23A
H2AFV
ELP4
ATF2
MFSD1
APOBEC3F
C9orf3
WDR78
FAM189B
PTAFR
SIMC1
SHCBP1
AC068831.10
CTD-2256P15.2
LAP3
MATR3
MYOM2
TUBE1
L3MBTL2
PSMC2
FAM208A
SAP30L
NEMF
TAF1D
TNIP2
KRT8
STAP2
LL0XNC01-131B10.2
RP11-417L14.1
AC005224.2
RP11-84C13.1
PCGF2
ELK3
QRICH2
MIS18A
ANTXR2
PTPLA
SLC23A3
RP11-267D19.2
RP5-1085F17.3
RP13-580F15.2
M6PR
MTMR2
GANAB
DAP3
AKIP1
ZRSR2
MACC1
RALGAPA2
API5P2
NMD3P1
VEZT
ANKMY2
NASP
C21orf91
NPM2
RAB4A
TOR1AIP2
HDAC3
TRMT12
GAPDHP63
RPF2P1
AC125238.2
GMPSP1
RP11-166P13.3
SIX4
RBMX2P2
MT1L
RN7SL138P
MCM2
E2F1
AMDHD2
AGRN
DAZAP2P1
NACAP1
AC000089.3
LINC00662
VN1R83P
RP11-597G23.1
TIMM44
FGF21
PPFIBP1
FRMD4B
ANKRD29
NMD3
IMP3
ZNF197
CTBP1-AS2
RP11-90H3.1
COX7A2P2
THADA
P2RY1
CRTAP
FAM21C
MAP6D1
2022-03-05
CDAN1
TMEM70
TTC32
PSME2P2
NUP205
ARSJ
SDR42E1
RP11-134K13.2
ZSCAN32
FUK
SOX12
PARVB
USP27X
CDC34
LINC00449
RPS29
SEPT7P2
AC016724.6
PHYH
KIAA1407
PLCD1
RNFT1
EEF1A1P19
CTNS
WBP11
RCOR3
EIF2D
FCHSD1
AC017060.1
TM4SF19-AS1
SH3TC1
SLC19A3
NGLY1
PCNT
GYG1P3
RP11-115J23.1
TMCC3
NCL
ELP2
ZNF566
GS1-542M4.3
EFCAB4B
ACOT11
AC004967.7
ZNF511
HIST1H3H
SPECC1L
ATF7IP
CTD-2016O11.1
ILVBL
NACA3P
ATXN10
ACOXL
RASSF6
RNF34
NHEJ1
RPL4P4
HINT1P1
LINC00346
FAM188B
EIF1AY
IFITM1
DTNBP1
FBXL8
HERC2P9
ZNF254
SPECC1
GLIPR1L2
UBE3AP2
MAX
FDXR
ENO3
FAM149A
CCT5P2
RP11-723O4.2
PPAP2A
ITFG1
FCHSD2
EIF3H
CLASP2
RP4-665J23.1
PPP6R3
TRMT5
SHKBP1
MEMO1
MTHFSD
ERI2
AC068499.10
CTD-2576F9.1
SNRPA1
SCLY
HSD17B4
ANP32D
FER
RP11-22P4.1
DPM1
PYCARD
RBM28
TMEM88
CTD-2012J19.1
RGL2
MINK1
RP11-1348G14.4
PCNXL4
MXD3
TRMT10B
PPIC
STK10
C10orf2
RP11-673E1.3
CTD-3195I5.5
AUNIP
C2orf44
UBXN11
TCEAL1
ZBTB38
AP001258.4
HDAC8
ZMYM6
ARHGEF39
MAN1A2
AC011242.6
AC007560.1
TIRAP
WDR73
DLG3
RP11-342M1.3
SLC2A4RG
MUC3A
OR7E14P
SLC12A8
DBF4
LY75
C19orf33
TCEA1P2
RP11-474I16.8
SMG1P1
THRAP3
NOP58
RAB3A
SMKR1
CDK18
PA2G4
POLR3G
ZNF808
DBNDD2
RP11-1407O15.2
ATP5SL
KLHL17
VARS
RP11-434D2.6
KANSL1
MAPRE2
VPS33B
ARHGEF34P
ADD3
C9orf91
ZNF333
RP11-118D22.3
ALDOC
HDDC3
TCHP
CNOT7P1
USP16
OSBPL9
STXBP6
ZNF397
OBSCN
ZNF141
LRRC27
DICER1-AS1
SIAH1
KIF9
STX1A
KLHL24
ZNF564
GLTSCR2
ZNF252P
DDX6P2
ALDH1L1-AS2
ABCA11P
PLXND1
NUP88
PRPF40A
KIAA1328
MAPK1IP1L
KIAA0895L
GART
STRADB
TMEM5
CBLB
UCK2
MAP2K1P1
ENOX2
IFT52
ESRP2
VASN
EMG1
FAM98C
KRT81
ERMP1
THOC5
ITGA7
DDX19B,RP11-529K1.3
FAM122C
AP4S1
CYB561A3
ZNF816-ZNF321P
AC009961.3
NDUFB6
DISP1
CYB5D2
MLLT10P1
NIP7
C7orf55
ZNF764
AC093901.1
CMC2
PIN4
TAPT1-AS1
INCENP
NR2C2AP
RASSF8-AS1
STYK1
CHIC2
ATOX1
AC110619.2
FAM209A
C1orf112
PHF20
INPP5K
RP11-342K6.1
ZNF225
RBM5
CIAPIN1P
FBXO8
PTPN4
TNK1
TRIM26
USP49
PCBD2
ZNF799
BMS1P20,LL22NC03-80A10.6
C15orf38
VTI1BP1
WDR83OS
MEMO1P1
C4orf47
PRRG2
ZNF23
LAMA2
EIF3B
MLLT10
CLIC1P1
OXR1
NDUFC2
TAF11
ZNF337
APIP
ACBD4
YARS2
RP11-539L10.3
RP11-267M23.7
ICMT
BHLHE41
RAB27A
RP13-270P17.3
C5orf66
FAM86HP
DNM1
PILRB
GCFC2
RGS5
ST3GAL3
TMEM198
FLII
RBM26-AS1
SRPX
SNORD3B-2
SRA1
THAP7-AS1
ALDH6A1
TMX2
CSPP1
WDR6
BIVM-ERCC5
RP11-234B24.2
UBA6
WRAP73
SLC2A12
CBX1P2
PRRT2
PPP1R10
CTD-2366F13.1
RP11-498E2.7
MRPS28
ALKBH4
UTY
IFT74
ZNF148
RHBDD3
ZNF75A
RP11-540A21.2
NLN

[truncated: 4 more sheets: Only_Crypto_72h, Only_Coinfection_Virus_72h, Only_Coinfection_Crypto_72h, Only_virus_crypto_72h]
