# Supplementary material for: Gene expression profile of HCT-8 cells following single or co-infections with Cryptosporidium parvum and bovine coronavirus
Source: Research Square preprint supplement (doi:10.21203/rs.3.rs-2673942/v1), 2023-03-23
Supplement: Supplementary file 5 [file 6a1a74ed19f0d20d7458ef30.xlsx]

## Sheet: Cntrl_vs_Coinfection_24h_Bio
Supplementary table S8: Results from the Gene Ontology (GO) analysis in the category for biological process complete (GObp) and Pathway Enrichment (KEGG pathways) in co-infected cells at 24 hpi.
#term ID	term description	observed gene count	background gene count	strength	false discovery rate	matching proteins in your network (IDs)	matching proteins in your network (labels)
GO:0019222	regulation of metabolic process	89	6516	0.3	2.44e-11	9606.ENSP00000200453,9606.ENSP00000216037,9606.ENSP00000228437,9606.ENSP00000230990,9606.ENSP00000234420,9606.ENSP00000239223,9606.ENSP00000240100,9606.ENSP00000242480,9606.ENSP00000244869,9606.ENSP00000245919,9606.ENSP00000252809,9606.ENSP00000253063,9606.ENSP00000256458,9606.ENSP00000256495,9606.ENSP00000261845,9606.ENSP00000263056,9606.ENSP00000263339,9606.ENSP00000264444,9606.ENSP00000264711,…	PPP1R15A,XBP1,PRDM4,HBEGF,MSH6,DUSP1,DUSP4,EGR2,EREG,FOSB,GDF15,SESN2,IRAK2,BHLHE40,MAPK6,MAP3K8,IL1A,MXD1,DNAJC27,ARRDC3,SIK1,CSRNP1,EAF2,PLK2,NRBF2,DUSP6,EIF2AK3,DDIT4,FOSL1,NFKBIB,ZFAND2A,SERTAD3,YOD1,HIST1H1B,RAB12,OVOL1,ZBTB49,CCNYL1,ATF3,INSIG1,SPRY4,MAFF,RASSF1,CREB5,SERTAD1,EPHA2,HIST1H2AG,ZNF460,TSC22D2,DUSP10,PTGS2,SGK1,CTGF,MCL1,DUSP5,PTBP2,GADD45A,JUN,LONRF3,ANKRD1,TSC22D3,ZC3H12A,ZBT…
GO:0031323	regulation of cellular metabolic process	86	6082	0.31	2.44e-11	9606.ENSP00000200453,9606.ENSP00000216037,9606.ENSP00000228437,9606.ENSP00000230990,9606.ENSP00000234420,9606.ENSP00000239223,9606.ENSP00000240100,9606.ENSP00000242480,9606.ENSP00000244869,9606.ENSP00000245919,9606.ENSP00000252809,9606.ENSP00000253063,9606.ENSP00000256458,9606.ENSP00000256495,9606.ENSP00000263056,9606.ENSP00000263339,9606.ENSP00000264444,9606.ENSP00000264711,9606.ENSP00000265138,…	PPP1R15A,XBP1,PRDM4,HBEGF,MSH6,DUSP1,DUSP4,EGR2,EREG,FOSB,GDF15,SESN2,IRAK2,BHLHE40,MAP3K8,IL1A,MXD1,DNAJC27,ARRDC3,SIK1,CSRNP1,EAF2,PLK2,NRBF2,DUSP6,EIF2AK3,DDIT4,FOSL1,NFKBIB,ZFAND2A,SERTAD3,YOD1,HIST1H1B,RAB12,OVOL1,ZBTB49,CCNYL1,ATF3,INSIG1,SPRY4,MAFF,RASSF1,CREB5,SERTAD1,EPHA2,HIST1H2AG,ZNF460,TSC22D2,DUSP10,PTGS2,SGK1,CTGF,MCL1,DUSP5,PTBP2,GADD45A,JUN,LONRF3,ANKRD1,TSC22D3,ZC3H12A,ZBTB43,TS…
GO:0033554	cellular response to stress	42	1553	0.59	2.44e-11	9606.ENSP00000167588,9606.ENSP00000200453,9606.ENSP00000216037,9606.ENSP00000222803,9606.ENSP00000234420,9606.ENSP00000249356,9606.ENSP00000253063,9606.ENSP00000256458,9606.ENSP00000263056,9606.ENSP00000263339,9606.ENSP00000272233,9606.ENSP00000274289,9606.ENSP00000277746,9606.ENSP00000306512,9606.ENSP00000307235,9606.ENSP00000307305,9606.ENSP00000326813,9606.ENSP00000344352,9606.ENSP00000344741,…	KRT20,PPP1R15A,XBP1,FKBP14,MSH6,DNAJB9,SESN2,IRAK2,MAP3K8,IL1A,RHOB,PLK2,NRBF2,CXCL8,EIF2AK3,DDIT4,YOD1,ATF3,INSIG1,RASSF1,EPHA2,PTGS2,SGK1,MCL1,GADD45A,JUN,ANKRD1,ZC3H12A,TSPYL2,ERRFI1,EDN1,TDG,VIMP,NABP1,HERPUD1,CDKN2AIP,UBC,FICD,DDIT3,DNAJC3,TNFAIP3,MAP3K14
GO:0051171	regulation of nitrogen compound metabolic process	84	5827	0.32	2.44e-11	9606.ENSP00000200453,9606.ENSP00000216037,9606.ENSP00000228437,9606.ENSP00000230990,9606.ENSP00000234420,9606.ENSP00000239223,9606.ENSP00000240100,9606.ENSP00000242480,9606.ENSP00000244869,9606.ENSP00000245919,9606.ENSP00000252809,9606.ENSP00000253063,9606.ENSP00000256458,9606.ENSP00000256495,9606.ENSP00000263056,9606.ENSP00000263339,9606.ENSP00000264444,9606.ENSP00000264711,9606.ENSP00000265138,…	PPP1R15A,XBP1,PRDM4,HBEGF,MSH6,DUSP1,DUSP4,EGR2,EREG,FOSB,GDF15,SESN2,IRAK2,BHLHE40,MAP3K8,IL1A,MXD1,DNAJC27,ARRDC3,SIK1,CSRNP1,EAF2,PLK2,NRBF2,DUSP6,EIF2AK3,DDIT4,FOSL1,NFKBIB,ZFAND2A,SERTAD3,YOD1,HIST1H1B,OVOL1,ZBTB49,CCNYL1,ATF3,INSIG1,SPRY4,MAFF,RASSF1,CREB5,SERTAD1,EPHA2,HIST1H2AG,ZNF460,TSC22D2,DUSP10,PTGS2,SGK1,CTGF,DUSP5,PTBP2,GADD45A,JUN,LONRF3,ANKRD1,TSC22D3,ZC3H12A,ZBTB43,TSPYL2,ZNF165…
GO:0080090	regulation of primary metabolic process	85	5982	0.31	2.44e-11	9606.ENSP00000200453,9606.ENSP00000216037,9606.ENSP00000228437,9606.ENSP00000230990,9606.ENSP00000234420,9606.ENSP00000239223,9606.ENSP00000240100,9606.ENSP00000242480,9606.ENSP00000244869,9606.ENSP00000245919,9606.ENSP00000252809,9606.ENSP00000253063,9606.ENSP00000256458,9606.ENSP00000256495,9606.ENSP00000263056,9606.ENSP00000263339,9606.ENSP00000264444,9606.ENSP00000264711,9606.ENSP00000265138,…	PPP1R15A,XBP1,PRDM4,HBEGF,MSH6,DUSP1,DUSP4,EGR2,EREG,FOSB,GDF15,SESN2,IRAK2,BHLHE40,MAP3K8,IL1A,MXD1,DNAJC27,ARRDC3,SIK1,CSRNP1,EAF2,PLK2,NRBF2,DUSP6,EIF2AK3,DDIT4,FOSL1,NFKBIB,ZFAND2A,SERTAD3,YOD1,HIST1H1B,OVOL1,ZBTB49,CCNYL1,ATF3,INSIG1,SPRY4,MAFF,RASSF1,CREB5,SERTAD1,EPHA2,HIST1H2AG,ZNF460,TSC22D2,DUSP10,PTGS2,SGK1,CTGF,DUSP5,PTBP2,GADD45A,JUN,LONRF3,ANKRD1,TSC22D3,ZC3H12A,ZBTB43,TSPYL2,ZNF165…
GO:0060255	regulation of macromolecule metabolic process	84	6072	0.3	5.43e-11	9606.ENSP00000200453,9606.ENSP00000216037,9606.ENSP00000228437,9606.ENSP00000230990,9606.ENSP00000234420,9606.ENSP00000239223,9606.ENSP00000240100,9606.ENSP00000242480,9606.ENSP00000244869,9606.ENSP00000245919,9606.ENSP00000252809,9606.ENSP00000253063,9606.ENSP00000256458,9606.ENSP00000256495,9606.ENSP00000261845,9606.ENSP00000263056,9606.ENSP00000263339,9606.ENSP00000264444,9606.ENSP00000264711,…	PPP1R15A,XBP1,PRDM4,HBEGF,MSH6,DUSP1,DUSP4,EGR2,EREG,FOSB,GDF15,SESN2,IRAK2,BHLHE40,MAPK6,MAP3K8,IL1A,MXD1,DNAJC27,ARRDC3,SIK1,CSRNP1,EAF2,PLK2,NRBF2,DUSP6,EIF2AK3,DDIT4,FOSL1,NFKBIB,ZFAND2A,SERTAD3,YOD1,HIST1H1B,OVOL1,ZBTB49,CCNYL1,ATF3,INSIG1,SPRY4,MAFF,RASSF1,CREB5,SERTAD1,EPHA2,HIST1H2AG,ZNF460,TSC22D2,DUSP10,PTGS2,SGK1,CTGF,DUSP5,PTBP2,GADD45A,JUN,LONRF3,ANKRD1,TSC22D3,ZC3H12A,ZBTB43,TSPYL2,…
GO:0006950	response to stress	59	3267	0.42	9.75e-11	9606.ENSP00000167588,9606.ENSP00000200453,9606.ENSP00000216037,9606.ENSP00000222803,9606.ENSP00000230990,9606.ENSP00000234420,9606.ENSP00000239223,9606.ENSP00000244869,9606.ENSP00000249356,9606.ENSP00000253063,9606.ENSP00000256458,9606.ENSP00000263056,9606.ENSP00000263339,9606.ENSP00000272233,9606.ENSP00000274289,9606.ENSP00000277746,9606.ENSP00000279488,9606.ENSP00000296026,9606.ENSP00000306512,…	KRT20,PPP1R15A,XBP1,FKBP14,HBEGF,MSH6,DUSP1,EREG,DNAJB9,SESN2,IRAK2,MAP3K8,IL1A,RHOB,PLK2,NRBF2,DUSP6,CXCL3,CXCL8,EIF2AK3,DDIT4,FOSL1,YOD1,RAB12,ATF3,PEAR1,INSIG1,MAFF,RASSF1,EPHA2,TSC22D2,PTGS2,SGK1,CTGF,MCL1,GADD45A,JUN,ANKRD1,TSC22D3,ZC3H12A,TSPYL2,ERRFI1,EDN1,TDG,HRH1,VIMP,CYR61,NABP1,HERPUD1,CDKN2AIP,CXCL2,MANF,UBC,FICD,DDIT3,DNAJC3,TNFAIP3,NR4A3,MAP3K14
GO:0071310	cellular response to organic substance	47	2219	0.49	3.34e-10	9606.ENSP00000216037,9606.ENSP00000222803,9606.ENSP00000227752,9606.ENSP00000239223,9606.ENSP00000242480,9606.ENSP00000244869,9606.ENSP00000245919,9606.ENSP00000249356,9606.ENSP00000252809,9606.ENSP00000253063,9606.ENSP00000256458,9606.ENSP00000261845,9606.ENSP00000263056,9606.ENSP00000263339,9606.ENSP00000270162,9606.ENSP00000296026,9606.ENSP00000306512,9606.ENSP00000307235,9606.ENSP00000307305,…	XBP1,FKBP14,IL10RA,DUSP1,EGR2,EREG,FOSB,DNAJB9,GDF15,SESN2,IRAK2,MAPK6,MAP3K8,IL1A,SIK1,CXCL3,CXCL8,EIF2AK3,DDIT4,NFKBIB,TNFRSF12A,YOD1,RAB12,ATF3,INSIG1,PTGS2,CTGF,MCL1,JUN,ANKRD1,ZC3H12A,TSPYL2,ERRFI1,EDN1,PIGA,HRH1,VIMP,ESRP1,HERPUD1,TIPARP,CXCL2,UBC,DDIT3,DNAJC3,TNFAIP3,NR4A3,MAP3K14
GO:0010033	response to organic substance	53	2815	0.44	5.26e-10	9606.ENSP00000216037,9606.ENSP00000222803,9606.ENSP00000227752,9606.ENSP00000239223,9606.ENSP00000242480,9606.ENSP00000244869,9606.ENSP00000245919,9606.ENSP00000249356,9606.ENSP00000252809,9606.ENSP00000253063,9606.ENSP00000256458,9606.ENSP00000261845,9606.ENSP00000263056,9606.ENSP00000263339,9606.ENSP00000270162,9606.ENSP00000279488,9606.ENSP00000296026,9606.ENSP00000306512,9606.ENSP00000307235,…	XBP1,FKBP14,IL10RA,DUSP1,EGR2,EREG,FOSB,DNAJB9,GDF15,SESN2,IRAK2,MAPK6,MAP3K8,IL1A,SIK1,DUSP6,CXCL3,CXCL8,EIF2AK3,DDIT4,FOSL1,NFKBIB,TNFRSF12A,YOD1,RAB12,ATF3,INSIG1,EPHA2,DUSP10,PTGS2,CTGF,MCL1,JUN,ANKRD1,ZC3H12A,TSPYL2,ERRFI1,EDN1,PIGA,HRH1,VIMP,ESRP1,HERPUD1,TIPARP,CXCL2,MANF,UBC,FICD,DDIT3,DNAJC3,TNFAIP3,NR4A3,MAP3K14
GO:0034976	response to endoplasmic reticulum stress	17	240	1.01	6.7e-10	9606.ENSP00000200453,9606.ENSP00000216037,9606.ENSP00000222803,9606.ENSP00000249356,9606.ENSP00000253063,9606.ENSP00000277746,9606.ENSP00000306512,9606.ENSP00000307235,9606.ENSP00000326813,9606.ENSP00000344352,9606.ENSP00000360266,9606.ENSP00000364591,9606.ENSP00000381282,9606.ENSP00000409555,9606.ENSP00000446479,9606.ENSP00000448665,9606.ENSP00000473631	PPP1R15A,XBP1,FKBP14,DNAJB9,SESN2,NRBF2,CXCL8,EIF2AK3,YOD1,ATF3,JUN,TSPYL2,VIMP,HERPUD1,FICD,DDIT3,DNAJC3
GO:0070887	cellular response to chemical stimulus	51	2672	0.44	8.58e-10	9606.ENSP00000216037,9606.ENSP00000222803,9606.ENSP00000227752,9606.ENSP00000230990,9606.ENSP00000239223,9606.ENSP00000242480,9606.ENSP00000244869,9606.ENSP00000245919,9606.ENSP00000249356,9606.ENSP00000252809,9606.ENSP00000253063,9606.ENSP00000256458,9606.ENSP00000261845,9606.ENSP00000263056,9606.ENSP00000263339,9606.ENSP00000270162,9606.ENSP00000272233,9606.ENSP00000296026,9606.ENSP00000306512,…	XBP1,FKBP14,IL10RA,HBEGF,DUSP1,EGR2,EREG,FOSB,DNAJB9,GDF15,SESN2,IRAK2,MAPK6,MAP3K8,IL1A,SIK1,RHOB,CXCL3,CXCL8,EIF2AK3,DDIT4,NFKBIB,ZFAND2A,TNFRSF12A,YOD1,RAB12,ATF3,INSIG1,EPHA2,PTGS2,CTGF,MCL1,JUN,ANKRD1,ZC3H12A,TSPYL2,ERRFI1,EDN1,PIGA,HRH1,VIMP,ESRP1,HERPUD1,TIPARP,CXCL2,UBC,DDIT3,DNAJC3,TNFAIP3,NR4A3,MAP3K14
GO:0010646	regulation of cell communication	57	3327	0.39	1.7e-09	9606.ENSP00000200453,9606.ENSP00000216037,9606.ENSP00000230990,9606.ENSP00000239223,9606.ENSP00000240100,9606.ENSP00000242480,9606.ENSP00000244869,9606.ENSP00000249356,9606.ENSP00000252809,9606.ENSP00000253063,9606.ENSP00000256458,9606.ENSP00000259874,9606.ENSP00000263056,9606.ENSP00000263339,9606.ENSP00000264711,9606.ENSP00000265138,9606.ENSP00000272233,9606.ENSP00000274289,9606.ENSP00000279488,…	PPP1R15A,XBP1,HBEGF,DUSP1,DUSP4,EGR2,EREG,DNAJB9,GDF15,SESN2,IRAK2,IER3,MAP3K8,IL1A,DNAJC27,ARRDC3,RHOB,PLK2,DUSP6,CXCL3,CXCL8,EIF2AK3,DDIT4,LURAP1L,TNFRSF12A,ATF3,PEAR1,INSIG1,SPRY4,EPHA2,OSGIN1,DUSP10,PTGS2,RGS16,CTGF,MCL1,DUSP5,GADD45A,JUN,ANKRD1,ZC3H12A,TSPYL2,ERRFI1,EDN1,XDH,HRH1,VIMP,CYR61,HERPUD1,CDKN2AIP,CXCL2,MANF,UBC,FICD,DDIT3,TNFAIP3,MAP3K14
GO:0009966	regulation of signal transduction	54	3033	0.41	1.8e-09	9606.ENSP00000200453,9606.ENSP00000216037,9606.ENSP00000230990,9606.ENSP00000239223,9606.ENSP00000240100,9606.ENSP00000244869,9606.ENSP00000249356,9606.ENSP00000252809,9606.ENSP00000253063,9606.ENSP00000256458,9606.ENSP00000259874,9606.ENSP00000263056,9606.ENSP00000263339,9606.ENSP00000264711,9606.ENSP00000265138,9606.ENSP00000272233,9606.ENSP00000279488,9606.ENSP00000296026,9606.ENSP00000306512,…	PPP1R15A,XBP1,HBEGF,DUSP1,DUSP4,EREG,DNAJB9,GDF15,SESN2,IRAK2,IER3,MAP3K8,IL1A,DNAJC27,ARRDC3,RHOB,DUSP6,CXCL3,CXCL8,EIF2AK3,DDIT4,LURAP1L,TNFRSF12A,ATF3,PEAR1,INSIG1,SPRY4,EPHA2,OSGIN1,DUSP10,PTGS2,RGS16,CTGF,MCL1,DUSP5,GADD45A,JUN,ANKRD1,ZC3H12A,TSPYL2,ERRFI1,EDN1,XDH,VIMP,CYR61,HERPUD1,CDKN2AIP,CXCL2,MANF,UBC,FICD,DDIT3,TNFAIP3,MAP3K14
GO:0031399	regulation of protein modification process	40	1747	0.52	1.8e-09	9606.ENSP00000200453,9606.ENSP00000216037,9606.ENSP00000230990,9606.ENSP00000239223,9606.ENSP00000240100,9606.ENSP00000244869,9606.ENSP00000252809,9606.ENSP00000253063,9606.ENSP00000256458,9606.ENSP00000263056,9606.ENSP00000264711,9606.ENSP00000265138,9606.ENSP00000279488,9606.ENSP00000307235,9606.ENSP00000307305,9606.ENSP00000330074,9606.ENSP00000342344,9606.ENSP00000344352,9606.ENSP00000344967,…	PPP1R15A,XBP1,HBEGF,DUSP1,DUSP4,EREG,GDF15,SESN2,IRAK2,MAP3K8,DNAJC27,ARRDC3,DUSP6,EIF2AK3,DDIT4,HIST1H1B,CCNYL1,ATF3,SPRY4,RASSF1,SERTAD1,EPHA2,DUSP10,PTGS2,CTGF,DUSP5,GADD45A,JUN,ZC3H12A,TSPYL2,ERRFI1,EDN1,XDH,CYR61,HERPUD1,DCUN1D2,UBC,DNAJC3,TNFAIP3,MAP3K14
GO:0006986	response to unfolded protein	14	153	1.12	1.81e-09	9606.ENSP00000216037,9606.ENSP00000222803,9606.ENSP00000249356,9606.ENSP00000306512,9606.ENSP00000307235,9606.ENSP00000326813,9606.ENSP00000344352,9606.ENSP00000364591,9606.ENSP00000381282,9606.ENSP00000409555,9606.ENSP00000432799,9606.ENSP00000446479,9606.ENSP00000448665,9606.ENSP00000473631	XBP1,FKBP14,DNAJB9,CXCL8,EIF2AK3,YOD1,ATF3,TSPYL2,VIMP,HERPUD1,MANF,FICD,DDIT3,DNAJC3
GO:0023051	regulation of signaling	57	3360	0.39	1.81e-09	9606.ENSP00000200453,9606.ENSP00000216037,9606.ENSP00000230990,9606.ENSP00000239223,9606.ENSP00000240100,9606.ENSP00000242480,9606.ENSP00000244869,9606.ENSP00000249356,9606.ENSP00000252809,9606.ENSP00000253063,9606.ENSP00000256458,9606.ENSP00000259874,9606.ENSP00000263056,9606.ENSP00000263339,9606.ENSP00000264711,9606.ENSP00000265138,9606.ENSP00000272233,9606.ENSP00000274289,9606.ENSP00000279488,…	PPP1R15A,XBP1,HBEGF,DUSP1,DUSP4,EGR2,EREG,DNAJB9,GDF15,SESN2,IRAK2,IER3,MAP3K8,IL1A,DNAJC27,ARRDC3,RHOB,PLK2,DUSP6,CXCL3,CXCL8,EIF2AK3,DDIT4,LURAP1L,TNFRSF12A,ATF3,PEAR1,INSIG1,SPRY4,EPHA2,OSGIN1,DUSP10,PTGS2,RGS16,CTGF,MCL1,DUSP5,GADD45A,JUN,ANKRD1,ZC3H12A,TSPYL2,ERRFI1,EDN1,XDH,HRH1,VIMP,CYR61,HERPUD1,CDKN2AIP,CXCL2,MANF,UBC,FICD,DDIT3,TNFAIP3,MAP3K14
GO:0051173	positive regulation of nitrogen compound metabolic process	53	2946	0.42	1.81e-09	9606.ENSP00000200453,9606.ENSP00000216037,9606.ENSP00000228437,9606.ENSP00000230990,9606.ENSP00000234420,9606.ENSP00000242480,9606.ENSP00000244869,9606.ENSP00000245919,9606.ENSP00000252809,9606.ENSP00000253063,9606.ENSP00000256458,9606.ENSP00000263056,9606.ENSP00000263339,9606.ENSP00000264711,9606.ENSP00000265138,9606.ENSP00000273153,9606.ENSP00000273668,9606.ENSP00000274289,9606.ENSP00000279488,…	PPP1R15A,XBP1,PRDM4,HBEGF,MSH6,EGR2,EREG,FOSB,GDF15,SESN2,IRAK2,MAP3K8,IL1A,DNAJC27,ARRDC3,CSRNP1,EAF2,PLK2,DUSP6,EIF2AK3,FOSL1,NFKBIB,ZFAND2A,SERTAD3,HIST1H1B,ZBTB49,ATF3,INSIG1,MAFF,RASSF1,CREB5,SERTAD1,PTGS2,CTGF,DUSP5,GADD45A,JUN,LONRF3,ANKRD1,ZC3H12A,EDN1,XDH,CYR61,HERPUD1,DCUN1D2,KLF6,TIPARP,UBC,DDIT3,DNAJC3,TNFAIP3,NR4A3,MAP3K14
GO:0031325	positive regulation of cellular metabolic process	54	3060	0.41	1.84e-09	9606.ENSP00000200453,9606.ENSP00000216037,9606.ENSP00000228437,9606.ENSP00000230990,9606.ENSP00000234420,9606.ENSP00000242480,9606.ENSP00000244869,9606.ENSP00000245919,9606.ENSP00000252809,9606.ENSP00000253063,9606.ENSP00000256458,9606.ENSP00000263056,9606.ENSP00000263339,9606.ENSP00000264711,9606.ENSP00000265138,9606.ENSP00000273153,9606.ENSP00000273668,9606.ENSP00000274289,9606.ENSP00000279488,…	PPP1R15A,XBP1,PRDM4,HBEGF,MSH6,EGR2,EREG,FOSB,GDF15,SESN2,IRAK2,MAP3K8,IL1A,DNAJC27,ARRDC3,CSRNP1,EAF2,PLK2,DUSP6,EIF2AK3,FOSL1,NFKBIB,ZFAND2A,SERTAD3,HIST1H1B,RAB12,ZBTB49,ATF3,INSIG1,MAFF,RASSF1,CREB5,SERTAD1,PTGS2,CTGF,DUSP5,GADD45A,JUN,LONRF3,ANKRD1,ZC3H12A,EDN1,XDH,HRH1,CYR61,HERPUD1,DCUN1D2,KLF6,UBC,DDIT3,DNAJC3,TNFAIP3,NR4A3,MAP3K14
GO:0080135	regulation of cellular response to stress	24	618	0.75	1.84e-09	9606.ENSP00000200453,9606.ENSP00000216037,9606.ENSP00000249356,9606.ENSP00000259874,9606.ENSP00000274289,9606.ENSP00000307235,9606.ENSP00000326813,9606.ENSP00000344741,9606.ENSP00000355866,9606.ENSP00000356438,9606.ENSP00000356954,9606.ENSP00000358022,9606.ENSP00000360025,9606.ENSP00000360762,9606.ENSP00000362179,9606.ENSP00000368683,9606.ENSP00000368727,9606.ENSP00000381282,9606.ENSP00000409555,…	PPP1R15A,XBP1,DNAJB9,IER3,PLK2,EIF2AK3,YOD1,INSIG1,DUSP10,PTGS2,CTGF,MCL1,GADD45A,ANKRD1,ZC3H12A,EDN1,XDH,VIMP,HERPUD1,MANF,FICD,DDIT3,DNAJC3,NR4A3
GO:0009893	positive regulation of metabolic process	56	3280	0.39	2.03e-09	9606.ENSP00000200453,9606.ENSP00000216037,9606.ENSP00000228437,9606.ENSP00000230990,9606.ENSP00000234420,9606.ENSP00000242480,9606.ENSP00000244869,9606.ENSP00000245919,9606.ENSP00000252809,9606.ENSP00000253063,9606.ENSP00000256458,9606.ENSP00000263056,9606.ENSP00000263339,9606.ENSP00000264711,9606.ENSP00000265138,9606.ENSP00000273153,9606.ENSP00000273668,9606.ENSP00000274289,9606.ENSP00000279488,…	PPP1R15A,XBP1,PRDM4,HBEGF,MSH6,EGR2,EREG,FOSB,GDF15,SESN2,IRAK2,MAP3K8,IL1A,DNAJC27,ARRDC3,CSRNP1,EAF2,PLK2,DUSP6,EIF2AK3,FOSL1,NFKBIB,ZFAND2A,SERTAD3,HIST1H1B,RAB12,ZBTB49,ATF3,INSIG1,MAFF,RASSF1,CREB5,SERTAD1,PTGS2,CTGF,DUSP5,GADD45A,JUN,LONRF3,ANKRD1,ZC3H12A,EDN1,XDH,PIGA,HRH1,CYR61,HERPUD1,DCUN1D2,KLF6,TIPARP,UBC,DDIT3,DNAJC3,TNFAIP3,NR4A3,MAP3K14
GO:0030968	endoplasmic reticulum unfolded protein response	12	103	1.23	3.19e-09	9606.ENSP00000216037,9606.ENSP00000222803,9606.ENSP00000249356,9606.ENSP00000306512,9606.ENSP00000307235,9606.ENSP00000326813,9606.ENSP00000344352,9606.ENSP00000364591,9606.ENSP00000381282,9606.ENSP00000409555,9606.ENSP00000448665,9606.ENSP00000473631	XBP1,FKBP14,DNAJB9,CXCL8,EIF2AK3,YOD1,ATF3,TSPYL2,VIMP,HERPUD1,DDIT3,DNAJC3
GO:0019220	regulation of phosphate metabolic process	38	1657	0.52	4.1e-09	9606.ENSP00000200453,9606.ENSP00000216037,9606.ENSP00000230990,9606.ENSP00000239223,9606.ENSP00000240100,9606.ENSP00000244869,9606.ENSP00000252809,9606.ENSP00000253063,9606.ENSP00000256458,9606.ENSP00000263056,9606.ENSP00000264711,9606.ENSP00000277746,9606.ENSP00000279488,9606.ENSP00000307235,9606.ENSP00000307305,9606.ENSP00000342344,9606.ENSP00000344352,9606.ENSP00000344967,9606.ENSP00000350633,…	PPP1R15A,XBP1,HBEGF,DUSP1,DUSP4,EREG,GDF15,SESN2,IRAK2,MAP3K8,DNAJC27,NRBF2,DUSP6,EIF2AK3,DDIT4,CCNYL1,ATF3,SPRY4,SERTAD1,EPHA2,DUSP10,PTGS2,CTGF,DUSP5,GADD45A,JUN,ZC3H12A,TSPYL2,ERRFI1,EDN1,XDH,PDP1,HRH1,CYR61,UBC,DNAJC3,TNFAIP3,MAP3K14
GO:0048523	negative regulation of cellular process	66	4454	0.33	4.32e-09	9606.ENSP00000200453,9606.ENSP00000216037,9606.ENSP00000230990,9606.ENSP00000234420,9606.ENSP00000239223,9606.ENSP00000240100,9606.ENSP00000244869,9606.ENSP00000245919,9606.ENSP00000249356,9606.ENSP00000252809,9606.ENSP00000253063,9606.ENSP00000256495,9606.ENSP00000259874,9606.ENSP00000263339,9606.ENSP00000264444,9606.ENSP00000265138,9606.ENSP00000270162,9606.ENSP00000272233,9606.ENSP00000273668,…	PPP1R15A,XBP1,HBEGF,MSH6,DUSP1,DUSP4,EREG,FOSB,DNAJB9,GDF15,SESN2,BHLHE40,IER3,IL1A,MXD1,ARRDC3,SIK1,RHOB,EAF2,PLK2,DUSP6,CXCL8,EIF2AK3,DDIT4,FOSL1,SERTAD3,YOD1,HIST1H1B,OVOL1,ZBTB49,ATF3,PEAR1,INSIG1,SPRY4,RASSF1,EPHA2,HIST1H2AG,OSGIN1,DUSP10,PTGS2,RGS16,CTGF,MCL1,DUSP5,PTBP2,GADD45A,JUN,ANKRD1,TSC22D3,ZC3H12A,TSPYL2,ERRFI1,EDN1,XDH,TDG,VIMP,CYR61,NABP1,HERPUD1,CDKN2AIP,USP36,UBC,DDIT3,DNAJC3,TN…
GO:1905897	regulation of response to endoplasmic reticulum stress	11	81	1.29	4.32e-09	9606.ENSP00000200453,9606.ENSP00000216037,9606.ENSP00000249356,9606.ENSP00000307235,9606.ENSP00000326813,9606.ENSP00000381282,9606.ENSP00000409555,9606.ENSP00000432799,9606.ENSP00000446479,9606.ENSP00000448665,9606.ENSP00000473631	PPP1R15A,XBP1,DNAJB9,EIF2AK3,YOD1,VIMP,HERPUD1,MANF,FICD,DDIT3,DNAJC3
GO:0048519	negative regulation of biological process	70	4953	0.31	4.98e-09	9606.ENSP00000200453,9606.ENSP00000216037,9606.ENSP00000230990,9606.ENSP00000234420,9606.ENSP00000239223,9606.ENSP00000240100,9606.ENSP00000244869,9606.ENSP00000245919,9606.ENSP00000249356,9606.ENSP00000252809,9606.ENSP00000253063,9606.ENSP00000256458,9606.ENSP00000256495,9606.ENSP00000259874,9606.ENSP00000263339,9606.ENSP00000264444,9606.ENSP00000265138,9606.ENSP00000270162,9606.ENSP00000272233,…	PPP1R15A,XBP1,HBEGF,MSH6,DUSP1,DUSP4,EREG,FOSB,DNAJB9,GDF15,SESN2,IRAK2,BHLHE40,IER3,IL1A,MXD1,ARRDC3,SIK1,RHOB,EAF2,PLK2,DUSP6,CXCL8,EIF2AK3,DDIT4,FOSL1,SERTAD3,YOD1,HIST1H1B,OVOL1,ZBTB49,ATF3,PEAR1,INSIG1,SPRY4,RASSF1,EPHA2,HIST1H2AG,OSGIN1,DUSP10,PTGS2,RGS16,CTGF,MCL1,DUSP5,PTBP2,GADD45A,JUN,ANKRD1,TSC22D3,YRDC,ZC3H12A,TSPYL2,ERRFI1,EDN1,XDH,TDG,VIMP,CYR61,NABP1,HERPUD1,TIPARP,CDKN2AIP,USP36,U…
GO:0050794	regulation of cellular process	109	10484	0.18	4.98e-09	9606.ENSP00000167588,9606.ENSP00000200453,9606.ENSP00000216037,9606.ENSP00000222803,9606.ENSP00000227752,9606.ENSP00000228437,9606.ENSP00000230990,9606.ENSP00000234420,9606.ENSP00000239223,9606.ENSP00000240100,9606.ENSP00000242480,9606.ENSP00000244869,9606.ENSP00000245919,9606.ENSP00000249356,9606.ENSP00000252809,9606.ENSP00000253063,9606.ENSP00000256458,9606.ENSP00000256495,9606.ENSP00000259874,…	KRT20,PPP1R15A,XBP1,FKBP14,IL10RA,PRDM4,HBEGF,MSH6,DUSP1,DUSP4,EGR2,EREG,FOSB,DNAJB9,GDF15,SESN2,IRAK2,BHLHE40,IER3,MAPK6,MAP3K8,IL1A,MXD1,DNAJC27,ARRDC3,SIK1,RHOB,CSRNP1,EAF2,PLK2,NRBF2,DUSP6,CXCL3,CXCL8,EIF2AK3,DDIT4,FOSL1,NFKBIB,ZFAND2A,LURAP1L,SERTAD3,TNFRSF12A,YOD1,HIST1H1B,RAB12,OVOL1,ZBTB49,CCNYL1,ATF3,PEAR1,INSIG1,SPRY4,MAFF,RASSF1,CREB5,SERTAD1,EPHA2,HIST1H2AG,ZNF460,TSC22D2,OSGIN1,DUSP1…
GO:1902531	regulation of intracellular signal transduction	39	1764	0.51	4.98e-09	9606.ENSP00000216037,9606.ENSP00000230990,9606.ENSP00000239223,9606.ENSP00000240100,9606.ENSP00000244869,9606.ENSP00000252809,9606.ENSP00000253063,9606.ENSP00000256458,9606.ENSP00000259874,9606.ENSP00000263056,9606.ENSP00000264711,9606.ENSP00000265138,9606.ENSP00000272233,9606.ENSP00000279488,9606.ENSP00000307235,9606.ENSP00000307305,9606.ENSP00000321026,9606.ENSP00000344352,9606.ENSP00000344967,…	XBP1,HBEGF,DUSP1,DUSP4,EREG,GDF15,SESN2,IRAK2,IER3,MAP3K8,DNAJC27,ARRDC3,RHOB,DUSP6,EIF2AK3,DDIT4,LURAP1L,ATF3,SPRY4,EPHA2,DUSP10,PTGS2,CTGF,MCL1,DUSP5,GADD45A,JUN,ANKRD1,ZC3H12A,ERRFI1,EDN1,XDH,VIMP,CYR61,HERPUD1,UBC,DDIT3,TNFAIP3,MAP3K14
GO:0010604	positive regulation of macromolecule metabolic process	53	3081	0.4	5.07e-09	9606.ENSP00000200453,9606.ENSP00000216037,9606.ENSP00000228437,9606.ENSP00000230990,9606.ENSP00000234420,9606.ENSP00000242480,9606.ENSP00000244869,9606.ENSP00000245919,9606.ENSP00000252809,9606.ENSP00000253063,9606.ENSP00000256458,9606.ENSP00000263056,9606.ENSP00000263339,9606.ENSP00000264711,9606.ENSP00000265138,9606.ENSP00000273153,9606.ENSP00000273668,9606.ENSP00000274289,9606.ENSP00000279488,…	PPP1R15A,XBP1,PRDM4,HBEGF,MSH6,EGR2,EREG,FOSB,GDF15,SESN2,IRAK2,MAP3K8,IL1A,DNAJC27,ARRDC3,CSRNP1,EAF2,PLK2,DUSP6,EIF2AK3,FOSL1,NFKBIB,ZFAND2A,SERTAD3,HIST1H1B,ZBTB49,ATF3,INSIG1,MAFF,RASSF1,CREB5,SERTAD1,PTGS2,CTGF,DUSP5,GADD45A,JUN,LONRF3,ANKRD1,ZC3H12A,EDN1,XDH,CYR61,HERPUD1,DCUN1D2,KLF6,TIPARP,UBC,DDIT3,DNAJC3,TNFAIP3,NR4A3,MAP3K14
GO:0001932	regulation of protein phosphorylation	34	1370	0.56	5.5e-09	9606.ENSP00000216037,9606.ENSP00000230990,9606.ENSP00000239223,9606.ENSP00000240100,9606.ENSP00000244869,9606.ENSP00000252809,9606.ENSP00000253063,9606.ENSP00000256458,9606.ENSP00000263056,9606.ENSP00000264711,9606.ENSP00000279488,9606.ENSP00000307235,9606.ENSP00000307305,9606.ENSP00000342344,9606.ENSP00000344352,9606.ENSP00000344967,9606.ENSP00000350633,9606.ENSP00000351209,9606.ENSP00000355866,…	XBP1,HBEGF,DUSP1,DUSP4,EREG,GDF15,SESN2,IRAK2,MAP3K8,DNAJC27,DUSP6,EIF2AK3,DDIT4,CCNYL1,ATF3,SPRY4,SERTAD1,EPHA2,DUSP10,PTGS2,CTGF,DUSP5,GADD45A,JUN,ZC3H12A,TSPYL2,ERRFI1,EDN1,XDH,CYR61,UBC,DNAJC3,TNFAIP3,MAP3K14
GO:0042325	regulation of phosphorylation	35	1465	0.54	6.96e-09	9606.ENSP00000216037,9606.ENSP00000230990,9606.ENSP00000239223,9606.ENSP00000240100,9606.ENSP00000244869,9606.ENSP00000252809,9606.ENSP00000253063,9606.ENSP00000256458,9606.ENSP00000263056,9606.ENSP00000264711,9606.ENSP00000277746,9606.ENSP00000279488,9606.ENSP00000307235,9606.ENSP00000307305,9606.ENSP00000342344,9606.ENSP00000344352,9606.ENSP00000344967,9606.ENSP00000350633,9606.ENSP00000351209,…	XBP1,HBEGF,DUSP1,DUSP4,EREG,GDF15,SESN2,IRAK2,MAP3K8,DNAJC27,NRBF2,DUSP6,EIF2AK3,DDIT4,CCNYL1,ATF3,SPRY4,SERTAD1,EPHA2,DUSP10,PTGS2,CTGF,DUSP5,GADD45A,JUN,ZC3H12A,TSPYL2,ERRFI1,EDN1,XDH,CYR61,UBC,DNAJC3,TNFAIP3,MAP3K14
GO:0048522	positive regulation of cellular process	69	4898	0.31	7.7e-09	9606.ENSP00000200453,9606.ENSP00000216037,9606.ENSP00000228437,9606.ENSP00000230990,9606.ENSP00000234420,9606.ENSP00000239223,9606.ENSP00000242480,9606.ENSP00000244869,9606.ENSP00000245919,9606.ENSP00000252809,9606.ENSP00000253063,9606.ENSP00000256458,9606.ENSP00000261845,9606.ENSP00000263056,9606.ENSP00000263339,9606.ENSP00000264711,9606.ENSP00000265138,9606.ENSP00000270162,9606.ENSP00000272233,…	PPP1R15A,XBP1,PRDM4,HBEGF,MSH6,DUSP1,EGR2,EREG,FOSB,GDF15,SESN2,IRAK2,MAPK6,MAP3K8,IL1A,DNAJC27,ARRDC3,SIK1,RHOB,CSRNP1,EAF2,PLK2,DUSP6,CXCL3,CXCL8,EIF2AK3,DDIT4,FOSL1,NFKBIB,ZFAND2A,LURAP1L,SERTAD3,TNFRSF12A,HIST1H1B,RAB12,OVOL1,ZBTB49,ATF3,INSIG1,MAFF,RASSF1,CREB5,SERTAD1,OSGIN1,DUSP10,PTGS2,CTGF,MCL1,DUSP5,GADD45A,JUN,LONRF3,ANKRD1,ZC3H12A,EDN1,XDH,HRH1,CYR61,HERPUD1,DCUN1D2,KLF6,CDKN2AIP,CXCL…
GO:0048585	negative regulation of response to stimulus	35	1483	0.53	8.86e-09	9606.ENSP00000200453,9606.ENSP00000216037,9606.ENSP00000239223,9606.ENSP00000240100,9606.ENSP00000249356,9606.ENSP00000252809,9606.ENSP00000253063,9606.ENSP00000263339,9606.ENSP00000265138,9606.ENSP00000274289,9606.ENSP00000279488,9606.ENSP00000306512,9606.ENSP00000307305,9606.ENSP00000326813,9606.ENSP00000344352,9606.ENSP00000344465,9606.ENSP00000344741,9606.ENSP00000344967,9606.ENSP00000351209,…	PPP1R15A,XBP1,DUSP1,DUSP4,DNAJB9,GDF15,SESN2,IL1A,ARRDC3,PLK2,DUSP6,CXCL8,DDIT4,YOD1,ATF3,PEAR1,INSIG1,SPRY4,EPHA2,DUSP10,PTGS2,RGS16,MCL1,DUSP5,ZC3H12A,ERRFI1,EDN1,XDH,VIMP,HERPUD1,UBC,DDIT3,DNAJC3,TNFAIP3,NR4A3
GO:1902532	negative regulation of intracellular signal transduction	21	514	0.77	8.86e-09	9606.ENSP00000216037,9606.ENSP00000239223,9606.ENSP00000240100,9606.ENSP00000253063,9606.ENSP00000265138,9606.ENSP00000279488,9606.ENSP00000307305,9606.ENSP00000344352,9606.ENSP00000344967,9606.ENSP00000351209,9606.ENSP00000355866,9606.ENSP00000356438,9606.ENSP00000358022,9606.ENSP00000358596,9606.ENSP00000362179,9606.ENSP00000366702,9606.ENSP00000368727,9606.ENSP00000381282,9606.ENSP00000409555,…	XBP1,DUSP1,DUSP4,SESN2,ARRDC3,DUSP6,DDIT4,ATF3,SPRY4,EPHA2,DUSP10,PTGS2,MCL1,DUSP5,ZC3H12A,ERRFI1,XDH,VIMP,HERPUD1,DDIT3,TNFAIP3
GO:0010648	negative regulation of cell communication	32	1255	0.57	9.96e-09	9606.ENSP00000200453,9606.ENSP00000216037,9606.ENSP00000239223,9606.ENSP00000240100,9606.ENSP00000249356,9606.ENSP00000252809,9606.ENSP00000253063,9606.ENSP00000263339,9606.ENSP00000265138,9606.ENSP00000274289,9606.ENSP00000279488,9606.ENSP00000306512,9606.ENSP00000307305,9606.ENSP00000344352,9606.ENSP00000344465,9606.ENSP00000344741,9606.ENSP00000344967,9606.ENSP00000351209,9606.ENSP00000355866,…	PPP1R15A,XBP1,DUSP1,DUSP4,DNAJB9,GDF15,SESN2,IL1A,ARRDC3,PLK2,DUSP6,CXCL8,DDIT4,ATF3,PEAR1,INSIG1,SPRY4,EPHA2,DUSP10,PTGS2,RGS16,MCL1,DUSP5,ZC3H12A,ERRFI1,EDN1,XDH,VIMP,HERPUD1,UBC,DDIT3,TNFAIP3
GO:0023057	negative regulation of signaling	32	1258	0.57	1.03e-08	9606.ENSP00000200453,9606.ENSP00000216037,9606.ENSP00000239223,9606.ENSP00000240100,9606.ENSP00000249356,9606.ENSP00000252809,9606.ENSP00000253063,9606.ENSP00000263339,9606.ENSP00000265138,9606.ENSP00000274289,9606.ENSP00000279488,9606.ENSP00000306512,9606.ENSP00000307305,9606.ENSP00000344352,9606.ENSP00000344465,9606.ENSP00000344741,9606.ENSP00000344967,9606.ENSP00000351209,9606.ENSP00000355866,…	PPP1R15A,XBP1,DUSP1,DUSP4,DNAJB9,GDF15,SESN2,IL1A,ARRDC3,PLK2,DUSP6,CXCL8,DDIT4,ATF3,PEAR1,INSIG1,SPRY4,EPHA2,DUSP10,PTGS2,RGS16,MCL1,DUSP5,ZC3H12A,ERRFI1,EDN1,XDH,VIMP,HERPUD1,UBC,DDIT3,TNFAIP3
GO:0042981	regulation of apoptotic process	35	1501	0.53	1.13e-08	9606.ENSP00000216037,9606.ENSP00000239223,9606.ENSP00000252809,9606.ENSP00000259874,9606.ENSP00000263056,9606.ENSP00000263339,9606.ENSP00000270162,9606.ENSP00000272233,9606.ENSP00000274289,9606.ENSP00000279488,9606.ENSP00000307235,9606.ENSP00000310170,9606.ENSP00000326737,9606.ENSP00000344352,9606.ENSP00000355374,9606.ENSP00000356438,9606.ENSP00000356832,9606.ENSP00000356954,9606.ENSP00000358022,…	XBP1,DUSP1,GDF15,IER3,MAP3K8,IL1A,SIK1,RHOB,PLK2,DUSP6,EIF2AK3,FOSL1,TNFRSF12A,ATF3,OSGIN1,PTGS2,SGK1,CTGF,MCL1,GADD45A,JUN,ANKRD1,TSC22D3,ZC3H12A,EDN1,XDH,VIMP,CYR61,HERPUD1,UBC,DDIT3,DNAJC3,TNFAIP3,NR4A3,MAP3K14
GO:0048518	positive regulation of biological process	73	5459	0.29	1.32e-08	9606.ENSP00000200453,9606.ENSP00000216037,9606.ENSP00000228437,9606.ENSP00000230990,9606.ENSP00000234420,9606.ENSP00000239223,9606.ENSP00000242480,9606.ENSP00000244869,9606.ENSP00000245919,9606.ENSP00000252809,9606.ENSP00000253063,9606.ENSP00000256458,9606.ENSP00000261845,9606.ENSP00000263056,9606.ENSP00000263339,9606.ENSP00000264711,9606.ENSP00000265138,9606.ENSP00000270162,9606.ENSP00000272233,…	PPP1R15A,XBP1,PRDM4,HBEGF,MSH6,DUSP1,EGR2,EREG,FOSB,GDF15,SESN2,IRAK2,MAPK6,MAP3K8,IL1A,DNAJC27,ARRDC3,SIK1,RHOB,CSRNP1,EAF2,PLK2,DUSP6,CXCL3,CXCL8,EIF2AK3,DDIT4,FOSL1,NFKBIB,ZFAND2A,LURAP1L,SERTAD3,TNFRSF12A,HIST1H1B,RAB12,OVOL1,ZBTB49,ATF3,INSIG1,MAFF,RASSF1,CREB5,SERTAD1,EPHA2,OSGIN1,DUSP10,PTGS2,SGK1,CTGF,MCL1,DUSP5,GADD45A,JUN,LONRF3,ANKRD1,ZC3H12A,EDN1,XDH,PIGA,HRH1,CYR61,HERPUD1,DCUN1D2,KL…
GO:0010942	positive regulation of cell death	23	663	0.7	1.95e-08	9606.ENSP00000216037,9606.ENSP00000239223,9606.ENSP00000270162,9606.ENSP00000272233,9606.ENSP00000279488,9606.ENSP00000307235,9606.ENSP00000307305,9606.ENSP00000310170,9606.ENSP00000326737,9606.ENSP00000344352,9606.ENSP00000355374,9606.ENSP00000356438,9606.ENSP00000356954,9606.ENSP00000358022,9606.ENSP00000360025,9606.ENSP00000360266,9606.ENSP00000360762,9606.ENSP00000362179,9606.ENSP00000368727,…	XBP1,DUSP1,SIK1,RHOB,DUSP6,EIF2AK3,DDIT4,FOSL1,TNFRSF12A,ATF3,OSGIN1,PTGS2,CTGF,MCL1,GADD45A,JUN,ANKRD1,ZC3H12A,XDH,CYR61,UBC,DDIT3,NR4A3
GO:0043065	positive regulation of apoptotic process	22	604	0.72	2.01e-08	9606.ENSP00000216037,9606.ENSP00000239223,9606.ENSP00000270162,9606.ENSP00000272233,9606.ENSP00000279488,9606.ENSP00000307235,9606.ENSP00000310170,9606.ENSP00000326737,9606.ENSP00000344352,9606.ENSP00000355374,9606.ENSP00000356438,9606.ENSP00000356954,9606.ENSP00000358022,9606.ENSP00000360025,9606.ENSP00000360266,9606.ENSP00000360762,9606.ENSP00000362179,9606.ENSP00000368727,9606.ENSP00000398736,…	XBP1,DUSP1,SIK1,RHOB,DUSP6,EIF2AK3,FOSL1,TNFRSF12A,ATF3,OSGIN1,PTGS2,CTGF,MCL1,GADD45A,JUN,ANKRD1,ZC3H12A,XDH,CYR61,UBC,DDIT3,NR4A3
GO:0080134	regulation of response to stress	32	1299	0.55	2.01e-08	9606.ENSP00000200453,9606.ENSP00000216037,9606.ENSP00000230990,9606.ENSP00000244869,9606.ENSP00000249356,9606.ENSP00000253063,9606.ENSP00000256458,9606.ENSP00000259874,9606.ENSP00000274289,9606.ENSP00000307235,9606.ENSP00000326737,9606.ENSP00000326813,9606.ENSP00000344741,9606.ENSP00000355866,9606.ENSP00000356438,9606.ENSP00000356954,9606.ENSP00000358022,9606.ENSP00000360025,9606.ENSP00000360762,…	PPP1R15A,XBP1,HBEGF,EREG,DNAJB9,SESN2,IRAK2,IER3,PLK2,EIF2AK3,TNFRSF12A,YOD1,INSIG1,DUSP10,PTGS2,CTGF,MCL1,GADD45A,ANKRD1,ZC3H12A,ERRFI1,EDN1,XDH,VIMP,HERPUD1,MANF,UBC,FICD,DDIT3,DNAJC3,TNFAIP3,NR4A3
GO:0048583	regulation of response to stimulus	59	3882	0.34	2.11e-08	9606.ENSP00000200453,9606.ENSP00000216037,9606.ENSP00000230990,9606.ENSP00000234420,9606.ENSP00000239223,9606.ENSP00000240100,9606.ENSP00000244869,9606.ENSP00000249356,9606.ENSP00000252809,9606.ENSP00000253063,9606.ENSP00000256458,9606.ENSP00000259874,9606.ENSP00000263056,9606.ENSP00000263339,9606.ENSP00000264711,9606.ENSP00000265138,9606.ENSP00000272233,9606.ENSP00000274289,9606.ENSP00000279488,…	PPP1R15A,XBP1,HBEGF,MSH6,DUSP1,DUSP4,EREG,DNAJB9,GDF15,SESN2,IRAK2,IER3,MAP3K8,IL1A,DNAJC27,ARRDC3,RHOB,PLK2,DUSP6,CXCL3,CXCL8,EIF2AK3,DDIT4,LURAP1L,TNFRSF12A,YOD1,ATF3,PEAR1,INSIG1,SPRY4,EPHA2,OSGIN1,DUSP10,PTGS2,RGS16,CTGF,MCL1,DUSP5,GADD45A,JUN,ANKRD1,ZC3H12A,TSPYL2,ERRFI1,EDN1,XDH,VIMP,CYR61,HERPUD1,CDKN2AIP,CXCL2,MANF,UBC,FICD,DDIT3,DNAJC3,TNFAIP3,NR4A3,MAP3K14
GO:0010941	regulation of cell death	36	1638	0.5	2.31e-08	9606.ENSP00000216037,9606.ENSP00000239223,9606.ENSP00000252809,9606.ENSP00000259874,9606.ENSP00000263056,9606.ENSP00000263339,9606.ENSP00000270162,9606.ENSP00000272233,9606.ENSP00000274289,9606.ENSP00000279488,9606.ENSP00000307235,9606.ENSP00000307305,9606.ENSP00000310170,9606.ENSP00000326737,9606.ENSP00000344352,9606.ENSP00000355374,9606.ENSP00000356438,9606.ENSP00000356832,9606.ENSP00000356954,…	XBP1,DUSP1,GDF15,IER3,MAP3K8,IL1A,SIK1,RHOB,PLK2,DUSP6,EIF2AK3,DDIT4,FOSL1,TNFRSF12A,ATF3,OSGIN1,PTGS2,SGK1,CTGF,MCL1,GADD45A,JUN,ANKRD1,TSC22D3,ZC3H12A,EDN1,XDH,VIMP,CYR61,HERPUD1,UBC,DDIT3,DNAJC3,TNFAIP3,NR4A3,MAP3K14
GO:0006984	ER-nucleus signaling pathway	8	34	1.53	2.34e-08	9606.ENSP00000216037,9606.ENSP00000306512,9606.ENSP00000307235,9606.ENSP00000344352,9606.ENSP00000344741,9606.ENSP00000381282,9606.ENSP00000409555,9606.ENSP00000448665	XBP1,CXCL8,EIF2AK3,ATF3,INSIG1,VIMP,HERPUD1,DDIT3
GO:0009968	negative regulation of signal transduction	30	1160	0.57	2.34e-08	9606.ENSP00000200453,9606.ENSP00000216037,9606.ENSP00000239223,9606.ENSP00000240100,9606.ENSP00000249356,9606.ENSP00000252809,9606.ENSP00000253063,9606.ENSP00000263339,9606.ENSP00000265138,9606.ENSP00000279488,9606.ENSP00000306512,9606.ENSP00000307305,9606.ENSP00000344352,9606.ENSP00000344465,9606.ENSP00000344741,9606.ENSP00000344967,9606.ENSP00000351209,9606.ENSP00000355866,9606.ENSP00000356438,…	PPP1R15A,XBP1,DUSP1,DUSP4,DNAJB9,GDF15,SESN2,IL1A,ARRDC3,DUSP6,CXCL8,DDIT4,ATF3,PEAR1,INSIG1,SPRY4,EPHA2,DUSP10,PTGS2,RGS16,MCL1,DUSP5,ZC3H12A,ERRFI1,XDH,VIMP,HERPUD1,UBC,DDIT3,TNFAIP3
GO:0050789	regulation of biological process	111	11116	0.16	2.34e-08	9606.ENSP00000167588,9606.ENSP00000200453,9606.ENSP00000216037,9606.ENSP00000222803,9606.ENSP00000227752,9606.ENSP00000228437,9606.ENSP00000230990,9606.ENSP00000234420,9606.ENSP00000239223,9606.ENSP00000240100,9606.ENSP00000242480,9606.ENSP00000244869,9606.ENSP00000245919,9606.ENSP00000249356,9606.ENSP00000252809,9606.ENSP00000253063,9606.ENSP00000256458,9606.ENSP00000256495,9606.ENSP00000259874,…	KRT20,PPP1R15A,XBP1,FKBP14,IL10RA,PRDM4,HBEGF,MSH6,DUSP1,DUSP4,EGR2,EREG,FOSB,DNAJB9,GDF15,SESN2,IRAK2,BHLHE40,IER3,MAPK6,MAP3K8,IL1A,MXD1,DNAJC27,ARRDC3,SIK1,RHOB,CSRNP1,EAF2,PLK2,NRBF2,DUSP6,CXCL3,CXCL8,EIF2AK3,DDIT4,FOSL1,NFKBIB,ZFAND2A,LURAP1L,SERTAD3,TNFRSF12A,YOD1,HIST1H1B,RAB12,OVOL1,ZBTB49,CCNYL1,ATF3,PEAR1,INSIG1,SPRY4,MAFF,RASSF1,CREB5,SERTAD1,EPHA2,HIST1H2AG,ZNF460,TSC22D2,OSGIN1,DUSP1…
GO:0031324	negative regulation of cellular metabolic process	45	2463	0.42	2.56e-08	9606.ENSP00000200453,9606.ENSP00000216037,9606.ENSP00000230990,9606.ENSP00000234420,9606.ENSP00000239223,9606.ENSP00000240100,9606.ENSP00000244869,9606.ENSP00000245919,9606.ENSP00000253063,9606.ENSP00000256495,9606.ENSP00000264444,9606.ENSP00000270162,9606.ENSP00000279488,9606.ENSP00000307235,9606.ENSP00000307305,9606.ENSP00000326813,9606.ENSP00000330074,9606.ENSP00000337862,9606.ENSP00000344352,…	PPP1R15A,XBP1,HBEGF,MSH6,DUSP1,DUSP4,EREG,FOSB,SESN2,BHLHE40,MXD1,SIK1,DUSP6,EIF2AK3,DDIT4,YOD1,HIST1H1B,OVOL1,ATF3,INSIG1,SPRY4,HIST1H2AG,DUSP10,PTGS2,MCL1,DUSP5,PTBP2,GADD45A,JUN,ANKRD1,TSC22D3,ZC3H12A,TSPYL2,ERRFI1,EDN1,XDH,TDG,VIMP,HERPUD1,USP36,UBC,DDIT3,DNAJC3,TNFAIP3,NR4A3
GO:0035556	intracellular signal transduction	34	1528	0.51	5.41e-08	9606.ENSP00000200453,9606.ENSP00000216037,9606.ENSP00000230990,9606.ENSP00000234420,9606.ENSP00000239223,9606.ENSP00000244869,9606.ENSP00000253063,9606.ENSP00000256458,9606.ENSP00000261845,9606.ENSP00000263056,9606.ENSP00000270162,9606.ENSP00000272233,9606.ENSP00000274289,9606.ENSP00000279488,9606.ENSP00000306512,9606.ENSP00000307235,9606.ENSP00000307305,9606.ENSP00000344465,9606.ENSP00000349547,…	PPP1R15A,XBP1,HBEGF,MSH6,DUSP1,EREG,SESN2,IRAK2,MAPK6,MAP3K8,SIK1,RHOB,PLK2,DUSP6,CXCL8,EIF2AK3,DDIT4,PEAR1,RASSF1,EPHA2,SGK1,CTGF,MCL1,DUSP5,GADD45A,JUN,RND3,EDN1,HRH1,AMOTL2,UBC,DDIT3,TNFAIP3,MAP3K14
GO:0043408	regulation of MAPK cascade	23	712	0.67	5.79e-08	9606.ENSP00000216037,9606.ENSP00000239223,9606.ENSP00000240100,9606.ENSP00000252809,9606.ENSP00000256458,9606.ENSP00000263056,9606.ENSP00000264711,9606.ENSP00000279488,9606.ENSP00000344352,9606.ENSP00000344967,9606.ENSP00000351209,9606.ENSP00000355866,9606.ENSP00000356954,9606.ENSP00000358596,9606.ENSP00000360025,9606.ENSP00000360266,9606.ENSP00000362179,9606.ENSP00000366702,9606.ENSP00000368683,…	XBP1,DUSP1,DUSP4,GDF15,IRAK2,MAP3K8,DNAJC27,DUSP6,ATF3,SPRY4,EPHA2,DUSP10,CTGF,DUSP5,GADD45A,JUN,ZC3H12A,ERRFI1,EDN1,XDH,CYR61,UBC,MAP3K14
GO:0009892	negative regulation of metabolic process	47	2762	0.39	8.68e-08	9606.ENSP00000200453,9606.ENSP00000216037,9606.ENSP00000230990,9606.ENSP00000234420,9606.ENSP00000239223,9606.ENSP00000240100,9606.ENSP00000244869,9606.ENSP00000245919,9606.ENSP00000253063,9606.ENSP00000256495,9606.ENSP00000264444,9606.ENSP00000270162,9606.ENSP00000279488,9606.ENSP00000307235,9606.ENSP00000307305,9606.ENSP00000326813,9606.ENSP00000330074,9606.ENSP00000337862,9606.ENSP00000344352,…	PPP1R15A,XBP1,HBEGF,MSH6,DUSP1,DUSP4,EREG,FOSB,SESN2,BHLHE40,MXD1,SIK1,DUSP6,EIF2AK3,DDIT4,YOD1,HIST1H1B,OVOL1,ATF3,INSIG1,SPRY4,HIST1H2AG,DUSP10,PTGS2,CTGF,MCL1,DUSP5,PTBP2,GADD45A,JUN,ANKRD1,TSC22D3,ZC3H12A,TSPYL2,ERRFI1,EDN1,XDH,TDG,VIMP,HERPUD1,TIPARP,USP36,UBC,DDIT3,DNAJC3,TNFAIP3,NR4A3
GO:0051246	regulation of protein metabolic process	46	2668	0.4	9.12e-08	9606.ENSP00000200453,9606.ENSP00000216037,9606.ENSP00000230990,9606.ENSP00000239223,9606.ENSP00000240100,9606.ENSP00000244869,9606.ENSP00000252809,9606.ENSP00000253063,9606.ENSP00000256458,9606.ENSP00000263056,9606.ENSP00000263339,9606.ENSP00000264711,9606.ENSP00000265138,9606.ENSP00000274289,9606.ENSP00000279488,9606.ENSP00000307235,9606.ENSP00000307305,9606.ENSP00000314619,9606.ENSP00000326813,…	PPP1R15A,XBP1,HBEGF,DUSP1,DUSP4,EREG,GDF15,SESN2,IRAK2,MAP3K8,IL1A,DNAJC27,ARRDC3,PLK2,DUSP6,EIF2AK3,DDIT4,ZFAND2A,YOD1,HIST1H1B,CCNYL1,ATF3,SPRY4,RASSF1,SERTAD1,EPHA2,DUSP10,PTGS2,CTGF,DUSP5,GADD45A,JUN,LONRF3,ZC3H12A,TSPYL2,ERRFI1,EDN1,XDH,CYR61,HERPUD1,DCUN1D2,TIPARP,UBC,DNAJC3,TNFAIP3,MAP3K14
GO:0032268	regulation of cellular protein metabolic process	44	2486	0.41	1.07e-07	9606.ENSP00000200453,9606.ENSP00000216037,9606.ENSP00000230990,9606.ENSP00000239223,9606.ENSP00000240100,9606.ENSP00000244869,9606.ENSP00000252809,9606.ENSP00000253063,9606.ENSP00000256458,9606.ENSP00000263056,9606.ENSP00000264711,9606.ENSP00000265138,9606.ENSP00000274289,9606.ENSP00000279488,9606.ENSP00000307235,9606.ENSP00000307305,9606.ENSP00000314619,9606.ENSP00000326813,9606.ENSP00000330074,…	PPP1R15A,XBP1,HBEGF,DUSP1,DUSP4,EREG,GDF15,SESN2,IRAK2,MAP3K8,DNAJC27,ARRDC3,PLK2,DUSP6,EIF2AK3,DDIT4,ZFAND2A,YOD1,HIST1H1B,CCNYL1,ATF3,SPRY4,RASSF1,SERTAD1,EPHA2,DUSP10,PTGS2,CTGF,DUSP5,GADD45A,JUN,LONRF3,ZC3H12A,TSPYL2,ERRFI1,EDN1,XDH,CYR61,HERPUD1,DCUN1D2,UBC,DNAJC3,TNFAIP3,MAP3K14
GO:0065007	biological regulation	113	11740	0.14	1.32e-07	9606.ENSP00000167588,9606.ENSP00000200453,9606.ENSP00000216037,9606.ENSP00000222803,9606.ENSP00000227752,9606.ENSP00000228437,9606.ENSP00000230990,9606.ENSP00000234420,9606.ENSP00000239223,9606.ENSP00000240100,9606.ENSP00000242480,9606.ENSP00000244869,9606.ENSP00000245919,9606.ENSP00000249356,9606.ENSP00000252809,9606.ENSP00000253063,9606.ENSP00000256458,9606.ENSP00000256495,9606.ENSP00000259874,…	KRT20,PPP1R15A,XBP1,FKBP14,IL10RA,PRDM4,HBEGF,MSH6,DUSP1,DUSP4,EGR2,EREG,FOSB,DNAJB9,GDF15,SESN2,IRAK2,BHLHE40,IER3,MAPK6,MAP3K8,IL1A,MXD1,DNAJC27,ARRDC3,SIK1,RHOB,CSRNP1,EAF2,PLK2,NRBF2,DUSP6,CXCL3,CXCL8,EIF2AK3,DDIT4,FOSL1,NFKBIB,ZFAND2A,LURAP1L,SERTAD3,TNFRSF12A,YOD1,HIST1H1B,RAB12,OVOL1,ZBTB49,CCNYL1,ATF3,PEAR1,INSIG1,SPRY4,MAFF,RASSF1,CREB5,SERTAD1,EPHA2,HIST1H2AG,ZNF460,TSC22D2,OSGIN1,DUSP1…
GO:0032496	response to lipopolysaccharide	15	298	0.86	2.11e-07	9606.ENSP00000216037,9606.ENSP00000227752,9606.ENSP00000256458,9606.ENSP00000296026,9606.ENSP00000306512,9606.ENSP00000312988,9606.ENSP00000355866,9606.ENSP00000356438,9606.ENSP00000360266,9606.ENSP00000360762,9606.ENSP00000362179,9606.ENSP00000368683,9606.ENSP00000381282,9606.ENSP00000427279,9606.ENSP00000481570	XBP1,IL10RA,IRAK2,CXCL3,CXCL8,NFKBIB,DUSP10,PTGS2,JUN,ANKRD1,ZC3H12A,EDN1,VIMP,CXCL2,TNFAIP3
GO:0065009	regulation of molecular function	51	3322	0.35	3.93e-07	9606.ENSP00000200453,9606.ENSP00000230990,9606.ENSP00000234420,9606.ENSP00000239223,9606.ENSP00000240100,9606.ENSP00000244869,9606.ENSP00000252809,9606.ENSP00000253063,9606.ENSP00000256458,9606.ENSP00000256495,9606.ENSP00000263056,9606.ENSP00000263339,9606.ENSP00000265138,9606.ENSP00000270162,9606.ENSP00000274289,9606.ENSP00000277746,9606.ENSP00000279488,9606.ENSP00000296026,9606.ENSP00000306512,…	PPP1R15A,HBEGF,MSH6,DUSP1,DUSP4,EREG,GDF15,SESN2,IRAK2,BHLHE40,MAP3K8,IL1A,ARRDC3,SIK1,PLK2,NRBF2,DUSP6,CXCL3,CXCL8,EIF2AK3,FOSL1,CCNYL1,SERTAD1,EPHA2,OSGIN1,DUSP10,PTGS2,RGS16,SGK1,CTGF,DUSP5,GADD45A,JUN,ZC3H12A,TSPYL2,ERRFI1,EDN1,XDH,TDG,VCPKMT,CYR61,HERPUD1,DCUN1D2,CXCL2,MANF,UBC,FICD,DDIT3,DNAJC3,TNFAIP3,MAP3K14
GO:0009889	regulation of biosynthetic process	60	4337	0.3	4.31e-07	9606.ENSP00000200453,9606.ENSP00000216037,9606.ENSP00000228437,9606.ENSP00000230990,9606.ENSP00000239223,9606.ENSP00000242480,9606.ENSP00000244869,9606.ENSP00000245919,9606.ENSP00000252809,9606.ENSP00000253063,9606.ENSP00000256458,9606.ENSP00000256495,9606.ENSP00000263339,9606.ENSP00000264444,9606.ENSP00000270162,9606.ENSP00000273153,9606.ENSP00000273668,9606.ENSP00000277746,9606.ENSP00000307235,…	PPP1R15A,XBP1,PRDM4,HBEGF,DUSP1,EGR2,EREG,FOSB,GDF15,SESN2,IRAK2,BHLHE40,IL1A,MXD1,SIK1,CSRNP1,EAF2,NRBF2,EIF2AK3,DDIT4,FOSL1,NFKBIB,SERTAD3,HIST1H1B,OVOL1,ZBTB49,ATF3,INSIG1,MAFF,CREB5,SERTAD1,HIST1H2AG,ZNF460,TSC22D2,PTGS2,SGK1,CTGF,JUN,ANKRD1,TSC22D3,ZC3H12A,ZBTB43,TSPYL2,ZNF165,ERRFI1,EDN1,ZMYM5,TDG,PDP1,HRH1,VIMP,ZNF527,CYR61,KLF6,UBC,DDIT3,ZNF699,DNAJC3,TNFAIP3,NR4A3
GO:0051247	positive regulation of protein metabolic process	33	1587	0.48	4.47e-07	9606.ENSP00000200453,9606.ENSP00000216037,9606.ENSP00000230990,9606.ENSP00000244869,9606.ENSP00000252809,9606.ENSP00000256458,9606.ENSP00000263056,9606.ENSP00000263339,9606.ENSP00000264711,9606.ENSP00000265138,9606.ENSP00000274289,9606.ENSP00000279488,9606.ENSP00000307235,9606.ENSP00000314619,9606.ENSP00000330074,9606.ENSP00000349547,9606.ENSP00000356438,9606.ENSP00000356954,9606.ENSP00000358596,…	PPP1R15A,XBP1,HBEGF,EREG,GDF15,IRAK2,MAP3K8,IL1A,DNAJC27,ARRDC3,PLK2,DUSP6,EIF2AK3,ZFAND2A,HIST1H1B,RASSF1,PTGS2,CTGF,DUSP5,GADD45A,JUN,LONRF3,ZC3H12A,EDN1,XDH,CYR61,HERPUD1,DCUN1D2,TIPARP,UBC,DNAJC3,TNFAIP3,MAP3K14
GO:0031326	regulation of cellular biosynthetic process	59	4266	0.3	6.13e-07	9606.ENSP00000200453,9606.ENSP00000216037,9606.ENSP00000228437,9606.ENSP00000230990,9606.ENSP00000239223,9606.ENSP00000242480,9606.ENSP00000244869,9606.ENSP00000245919,9606.ENSP00000252809,9606.ENSP00000253063,9606.ENSP00000256458,9606.ENSP00000256495,9606.ENSP00000263339,9606.ENSP00000264444,9606.ENSP00000270162,9606.ENSP00000273153,9606.ENSP00000273668,9606.ENSP00000277746,9606.ENSP00000307235,…	PPP1R15A,XBP1,PRDM4,HBEGF,DUSP1,EGR2,EREG,FOSB,GDF15,SESN2,IRAK2,BHLHE40,IL1A,MXD1,SIK1,CSRNP1,EAF2,NRBF2,EIF2AK3,DDIT4,FOSL1,NFKBIB,SERTAD3,HIST1H1B,OVOL1,ZBTB49,ATF3,INSIG1,MAFF,CREB5,SERTAD1,HIST1H2AG,ZNF460,TSC22D2,PTGS2,SGK1,JUN,ANKRD1,TSC22D3,ZC3H12A,ZBTB43,TSPYL2,ZNF165,ERRFI1,EDN1,ZMYM5,TDG,PDP1,HRH1,VIMP,ZNF527,CYR61,KLF6,UBC,DDIT3,ZNF699,DNAJC3,TNFAIP3,NR4A3
GO:0042221	response to chemical	58	4153	0.31	6.15e-07	9606.ENSP00000216037,9606.ENSP00000222803,9606.ENSP00000227752,9606.ENSP00000230990,9606.ENSP00000239223,9606.ENSP00000242480,9606.ENSP00000244869,9606.ENSP00000245919,9606.ENSP00000249356,9606.ENSP00000252809,9606.ENSP00000253063,9606.ENSP00000256458,9606.ENSP00000261845,9606.ENSP00000263056,9606.ENSP00000263339,9606.ENSP00000270162,9606.ENSP00000272233,9606.ENSP00000279488,9606.ENSP00000296026,…	XBP1,FKBP14,IL10RA,HBEGF,DUSP1,EGR2,EREG,FOSB,DNAJB9,GDF15,SESN2,IRAK2,MAPK6,MAP3K8,IL1A,SIK1,RHOB,DUSP6,CXCL3,CXCL8,EIF2AK3,DDIT4,FOSL1,NFKBIB,ZFAND2A,TNFRSF12A,YOD1,RAB12,ATF3,INSIG1,EPHA2,DUSP10,PTGS2,CTGF,MCL1,JUN,ANKRD1,SLC25A25,ZC3H12A,TSPYL2,ERRFI1,EDN1,PIGA,HRH1,VIMP,CYR61,ESRP1,HERPUD1,TIPARP,CXCL2,MANF,UBC,FICD,DDIT3,DNAJC3,TNFAIP3,NR4A3,MAP3K14
GO:0010605	negative regulation of macromolecule metabolic process	43	2558	0.39	7.04e-07	9606.ENSP00000200453,9606.ENSP00000216037,9606.ENSP00000230990,9606.ENSP00000234420,9606.ENSP00000239223,9606.ENSP00000240100,9606.ENSP00000244869,9606.ENSP00000245919,9606.ENSP00000253063,9606.ENSP00000256495,9606.ENSP00000264444,9606.ENSP00000279488,9606.ENSP00000307235,9606.ENSP00000307305,9606.ENSP00000326813,9606.ENSP00000330074,9606.ENSP00000337862,9606.ENSP00000344352,9606.ENSP00000344967,…	PPP1R15A,XBP1,HBEGF,MSH6,DUSP1,DUSP4,EREG,FOSB,SESN2,BHLHE40,MXD1,DUSP6,EIF2AK3,DDIT4,YOD1,HIST1H1B,OVOL1,ATF3,SPRY4,HIST1H2AG,DUSP10,PTGS2,CTGF,DUSP5,PTBP2,GADD45A,JUN,ANKRD1,TSC22D3,ZC3H12A,TSPYL2,ERRFI1,EDN1,XDH,TDG,VIMP,HERPUD1,TIPARP,UBC,DDIT3,DNAJC3,TNFAIP3,NR4A3
GO:0033993	response to lipid	23	825	0.61	7.04e-07	9606.ENSP00000216037,9606.ENSP00000227752,9606.ENSP00000239223,9606.ENSP00000245919,9606.ENSP00000256458,9606.ENSP00000296026,9606.ENSP00000306512,9606.ENSP00000307305,9606.ENSP00000310170,9606.ENSP00000312988,9606.ENSP00000344741,9606.ENSP00000355866,9606.ENSP00000356438,9606.ENSP00000356954,9606.ENSP00000360266,9606.ENSP00000360762,9606.ENSP00000362179,9606.ENSP00000366702,9606.ENSP00000368683,…	XBP1,IL10RA,DUSP1,FOSB,IRAK2,CXCL3,CXCL8,DDIT4,FOSL1,NFKBIB,INSIG1,DUSP10,PTGS2,CTGF,JUN,ANKRD1,ZC3H12A,ERRFI1,EDN1,VIMP,CXCL2,TNFAIP3,NR4A3
GO:0051172	negative regulation of nitrogen compound metabolic process	40	2307	0.4	1.15e-06	9606.ENSP00000200453,9606.ENSP00000216037,9606.ENSP00000230990,9606.ENSP00000234420,9606.ENSP00000239223,9606.ENSP00000240100,9606.ENSP00000244869,9606.ENSP00000245919,9606.ENSP00000253063,9606.ENSP00000256495,9606.ENSP00000264444,9606.ENSP00000279488,9606.ENSP00000307235,9606.ENSP00000307305,9606.ENSP00000326813,9606.ENSP00000330074,9606.ENSP00000337862,9606.ENSP00000344352,9606.ENSP00000344967,…	PPP1R15A,XBP1,HBEGF,MSH6,DUSP1,DUSP4,EREG,FOSB,SESN2,BHLHE40,MXD1,DUSP6,EIF2AK3,DDIT4,YOD1,HIST1H1B,OVOL1,ATF3,SPRY4,HIST1H2AG,DUSP10,PTGS2,DUSP5,PTBP2,GADD45A,JUN,ANKRD1,TSC22D3,ZC3H12A,TSPYL2,ERRFI1,EDN1,XDH,TDG,HERPUD1,UBC,DDIT3,DNAJC3,TNFAIP3,NR4A3
GO:0032270	positive regulation of cellular protein metabolic process	31	1496	0.48	1.39e-06	9606.ENSP00000200453,9606.ENSP00000216037,9606.ENSP00000230990,9606.ENSP00000244869,9606.ENSP00000252809,9606.ENSP00000256458,9606.ENSP00000263056,9606.ENSP00000264711,9606.ENSP00000265138,9606.ENSP00000274289,9606.ENSP00000279488,9606.ENSP00000307235,9606.ENSP00000314619,9606.ENSP00000330074,9606.ENSP00000349547,9606.ENSP00000356438,9606.ENSP00000356954,9606.ENSP00000358596,9606.ENSP00000360025,…	PPP1R15A,XBP1,HBEGF,EREG,GDF15,IRAK2,MAP3K8,DNAJC27,ARRDC3,PLK2,DUSP6,EIF2AK3,ZFAND2A,HIST1H1B,RASSF1,PTGS2,CTGF,DUSP5,GADD45A,JUN,LONRF3,ZC3H12A,EDN1,XDH,CYR61,HERPUD1,DCUN1D2,UBC,DNAJC3,TNFAIP3,MAP3K14
GO:0070373	negative regulation of ERK1 and ERK2 cascade	8	65	1.25	1.58e-06	9606.ENSP00000216037,9606.ENSP00000239223,9606.ENSP00000240100,9606.ENSP00000279488,9606.ENSP00000344352,9606.ENSP00000344967,9606.ENSP00000355866,9606.ENSP00000366702	XBP1,DUSP1,DUSP4,DUSP6,ATF3,SPRY4,DUSP10,ERRFI1
GO:0044260	cellular macromolecule metabolic process	75	6413	0.23	2.09e-06	9606.ENSP00000200453,9606.ENSP00000216037,9606.ENSP00000222803,9606.ENSP00000228437,9606.ENSP00000230990,9606.ENSP00000234420,9606.ENSP00000239223,9606.ENSP00000240100,9606.ENSP00000242480,9606.ENSP00000244869,9606.ENSP00000245919,9606.ENSP00000249356,9606.ENSP00000253063,9606.ENSP00000256458,9606.ENSP00000256495,9606.ENSP00000261845,9606.ENSP00000263056,9606.ENSP00000264444,9606.ENSP00000270162,…	PPP1R15A,XBP1,FKBP14,PRDM4,HBEGF,MSH6,DUSP1,DUSP4,EGR2,EREG,FOSB,DNAJB9,SESN2,IRAK2,BHLHE40,MAPK6,MAP3K8,MXD1,SIK1,CSRNP1,EAF2,PLK2,NRBF2,DUSP6,CXCL8,EIF2AK3,FOSL1,FUT1,NFKBIB,SERTAD3,YOD1,RAB12,OVOL1,ZBTB49,ATF3,MAFF,CREB5,SERTAD1,EPHA2,ZNF460,DUSP10,SGK1,CTGF,DUSP5,GADD45A,JUN,LONRF3,ZC3H12A,ZBTB43,TSPYL2,ZNF165,PIGA,ZMYM5,TDG,VCPKMT,PDP1,VIMP,ZNF527,CYR61,NABP1,HERPUD1,DCUN1D2,KLF6,TIPARP,THUM…
GO:1903573	negative regulation of response to endoplasmic reticulum stress	7	44	1.36	2.3e-06	9606.ENSP00000200453,9606.ENSP00000216037,9606.ENSP00000249356,9606.ENSP00000326813,9606.ENSP00000381282,9606.ENSP00000409555,9606.ENSP00000473631	PPP1R15A,XBP1,DNAJB9,YOD1,VIMP,HERPUD1,DNAJC3
GO:0001933	negative regulation of protein phosphorylation	16	422	0.74	2.31e-06	9606.ENSP00000216037,9606.ENSP00000239223,9606.ENSP00000240100,9606.ENSP00000279488,9606.ENSP00000307305,9606.ENSP00000344352,9606.ENSP00000344967,9606.ENSP00000355866,9606.ENSP00000358596,9606.ENSP00000360025,9606.ENSP00000360266,9606.ENSP00000362179,9606.ENSP00000366702,9606.ENSP00000368727,9606.ENSP00000473631,9606.ENSP00000481570	XBP1,DUSP1,DUSP4,DUSP6,DDIT4,ATF3,SPRY4,DUSP10,DUSP5,GADD45A,JUN,ZC3H12A,ERRFI1,XDH,DNAJC3,TNFAIP3
GO:0051338	regulation of transferase activity	24	964	0.56	2.38e-06	9606.ENSP00000239223,9606.ENSP00000240100,9606.ENSP00000244869,9606.ENSP00000252809,9606.ENSP00000253063,9606.ENSP00000256458,9606.ENSP00000263056,9606.ENSP00000265138,9606.ENSP00000277746,9606.ENSP00000279488,9606.ENSP00000342344,9606.ENSP00000350633,9606.ENSP00000355866,9606.ENSP00000358596,9606.ENSP00000360025,9606.ENSP00000364591,9606.ENSP00000366702,9606.ENSP00000368683,9606.ENSP00000398736,…	DUSP1,DUSP4,EREG,GDF15,SESN2,IRAK2,MAP3K8,ARRDC3,NRBF2,DUSP6,CCNYL1,SERTAD1,DUSP10,DUSP5,GADD45A,TSPYL2,ERRFI1,EDN1,CYR61,DCUN1D2,UBC,DNAJC3,TNFAIP3,MAP3K14
GO:0001944	vasculature development	17	487	0.7	2.66e-06	9606.ENSP00000216037,9606.ENSP00000244869,9606.ENSP00000272233,9606.ENSP00000306512,9606.ENSP00000307235,9606.ENSP00000310170,9606.ENSP00000326737,9606.ENSP00000351209,9606.ENSP00000356438,9606.ENSP00000356954,9606.ENSP00000360266,9606.ENSP00000362179,9606.ENSP00000366702,9606.ENSP00000368683,9606.ENSP00000398736,9606.ENSP00000420612,9606.ENSP00000448665	XBP1,EREG,RHOB,CXCL8,EIF2AK3,FOSL1,TNFRSF12A,EPHA2,PTGS2,CTGF,JUN,ZC3H12A,ERRFI1,EDN1,CYR61,TIPARP,DDIT3
GO:0051726	regulation of cell cycle	26	1129	0.52	2.73e-06	9606.ENSP00000200453,9606.ENSP00000239223,9606.ENSP00000244869,9606.ENSP00000263056,9606.ENSP00000263339,9606.ENSP00000270162,9606.ENSP00000272233,9606.ENSP00000274289,9606.ENSP00000306512,9606.ENSP00000310170,9606.ENSP00000337862,9606.ENSP00000338807,9606.ENSP00000342344,9606.ENSP00000349547,9606.ENSP00000350633,9606.ENSP00000356438,9606.ENSP00000356954,9606.ENSP00000360025,9606.ENSP00000360266,…	PPP1R15A,DUSP1,EREG,MAP3K8,IL1A,SIK1,RHOB,PLK2,CXCL8,FOSL1,OVOL1,ZBTB49,CCNYL1,RASSF1,SERTAD1,PTGS2,CTGF,GADD45A,JUN,TSPYL2,EDN1,NABP1,DDIT3,TNFAIP3,NR4A3,MAP3K14
GO:0036499	PERK-mediated unfolded protein response	5	12	1.78	3.2e-06	9606.ENSP00000306512,9606.ENSP00000307235,9606.ENSP00000344352,9606.ENSP00000409555,9606.ENSP00000448665	CXCL8,EIF2AK3,ATF3,HERPUD1,DDIT3
GO:0019219	regulation of nucleobase-containing compound metabolic process	56	4133	0.29	3.24e-06	9606.ENSP00000216037,9606.ENSP00000228437,9606.ENSP00000234420,9606.ENSP00000239223,9606.ENSP00000242480,9606.ENSP00000244869,9606.ENSP00000245919,9606.ENSP00000252809,9606.ENSP00000253063,9606.ENSP00000256458,9606.ENSP00000256495,9606.ENSP00000263339,9606.ENSP00000264444,9606.ENSP00000270162,9606.ENSP00000273153,9606.ENSP00000273668,9606.ENSP00000277746,9606.ENSP00000307235,9606.ENSP00000307305,…	XBP1,PRDM4,MSH6,DUSP1,EGR2,EREG,FOSB,GDF15,SESN2,IRAK2,BHLHE40,IL1A,MXD1,SIK1,CSRNP1,EAF2,NRBF2,EIF2AK3,DDIT4,FOSL1,NFKBIB,SERTAD3,HIST1H1B,OVOL1,ZBTB49,ATF3,INSIG1,MAFF,CREB5,SERTAD1,HIST1H2AG,ZNF460,TSC22D2,SGK1,PTBP2,JUN,ANKRD1,TSC22D3,ZC3H12A,ZBTB43,TSPYL2,ZNF165,EDN1,ZMYM5,TDG,PDP1,ZNF527,CYR61,ESRP1,KLF6,USP36,UBC,DDIT3,ZNF699,TNFAIP3,NR4A3
GO:0070372	regulation of ERK1 and ERK2 cascade	13	274	0.84	3.45e-06	9606.ENSP00000216037,9606.ENSP00000239223,9606.ENSP00000240100,9606.ENSP00000264711,9606.ENSP00000279488,9606.ENSP00000344352,9606.ENSP00000344967,9606.ENSP00000351209,9606.ENSP00000355866,9606.ENSP00000356954,9606.ENSP00000360266,9606.ENSP00000366702,9606.ENSP00000398736	XBP1,DUSP1,DUSP4,DNAJC27,DUSP6,ATF3,SPRY4,EPHA2,DUSP10,CTGF,JUN,ERRFI1,CYR61
GO:0043549	regulation of kinase activity	22	849	0.57	4.28e-06	9606.ENSP00000239223,9606.ENSP00000240100,9606.ENSP00000244869,9606.ENSP00000252809,9606.ENSP00000253063,9606.ENSP00000256458,9606.ENSP00000263056,9606.ENSP00000277746,9606.ENSP00000279488,9606.ENSP00000342344,9606.ENSP00000350633,9606.ENSP00000355866,9606.ENSP00000358596,9606.ENSP00000360025,9606.ENSP00000364591,9606.ENSP00000366702,9606.ENSP00000368683,9606.ENSP00000398736,9606.ENSP00000441543,…	DUSP1,DUSP4,EREG,GDF15,SESN2,IRAK2,MAP3K8,NRBF2,DUSP6,CCNYL1,SERTAD1,DUSP10,DUSP5,GADD45A,TSPYL2,ERRFI1,EDN1,CYR61,UBC,DNAJC3,TNFAIP3,MAP3K14
GO:0009605	response to external stimulus	37	2152	0.4	4.73e-06	9606.ENSP00000167588,9606.ENSP00000216037,9606.ENSP00000227752,9606.ENSP00000230990,9606.ENSP00000242480,9606.ENSP00000245919,9606.ENSP00000252809,9606.ENSP00000253063,9606.ENSP00000256458,9606.ENSP00000256495,9606.ENSP00000270162,9606.ENSP00000296026,9606.ENSP00000306512,9606.ENSP00000307235,9606.ENSP00000307305,9606.ENSP00000310170,9606.ENSP00000312988,9606.ENSP00000331748,9606.ENSP00000344352,…	KRT20,XBP1,IL10RA,HBEGF,EGR2,FOSB,GDF15,SESN2,IRAK2,BHLHE40,SIK1,CXCL3,CXCL8,EIF2AK3,DDIT4,FOSL1,NFKBIB,RAB12,ATF3,EPHA2,DUSP10,PTGS2,GADD45A,JUN,ANKRD1,SLC25A25,ZC3H12A,EDN1,HRH1,VIMP,CYR61,CXCL2,DDIT3,DNAJC3,TNFAIP3,NR4A3,MAP3K14
GO:0050790	regulation of catalytic activity	38	2249	0.39	4.73e-06	9606.ENSP00000200453,9606.ENSP00000234420,9606.ENSP00000239223,9606.ENSP00000240100,9606.ENSP00000244869,9606.ENSP00000252809,9606.ENSP00000253063,9606.ENSP00000256458,9606.ENSP00000263056,9606.ENSP00000265138,9606.ENSP00000277746,9606.ENSP00000279488,9606.ENSP00000307235,9606.ENSP00000342344,9606.ENSP00000350633,9606.ENSP00000351209,9606.ENSP00000355866,9606.ENSP00000356438,9606.ENSP00000356529,…	PPP1R15A,MSH6,DUSP1,DUSP4,EREG,GDF15,SESN2,IRAK2,MAP3K8,ARRDC3,NRBF2,DUSP6,EIF2AK3,CCNYL1,SERTAD1,EPHA2,DUSP10,PTGS2,RGS16,SGK1,CTGF,DUSP5,GADD45A,JUN,TSPYL2,ERRFI1,EDN1,XDH,TDG,VCPKMT,CYR61,HERPUD1,DCUN1D2,UBC,FICD,DNAJC3,TNFAIP3,MAP3K14
GO:0045859	regulation of protein kinase activity	21	788	0.59	5.28e-06	9606.ENSP00000239223,9606.ENSP00000240100,9606.ENSP00000244869,9606.ENSP00000252809,9606.ENSP00000253063,9606.ENSP00000256458,9606.ENSP00000263056,9606.ENSP00000279488,9606.ENSP00000342344,9606.ENSP00000350633,9606.ENSP00000355866,9606.ENSP00000358596,9606.ENSP00000360025,9606.ENSP00000364591,9606.ENSP00000366702,9606.ENSP00000368683,9606.ENSP00000398736,9606.ENSP00000441543,9606.ENSP00000473631,…	DUSP1,DUSP4,EREG,GDF15,SESN2,IRAK2,MAP3K8,DUSP6,CCNYL1,SERTAD1,DUSP10,DUSP5,GADD45A,TSPYL2,ERRFI1,EDN1,CYR61,UBC,DNAJC3,TNFAIP3,MAP3K14
GO:0051716	cellular response to stimulus	72	6212	0.23	6.74e-06	9606.ENSP00000167588,9606.ENSP00000200453,9606.ENSP00000216037,9606.ENSP00000222803,9606.ENSP00000227752,9606.ENSP00000228437,9606.ENSP00000230990,9606.ENSP00000234420,9606.ENSP00000239223,9606.ENSP00000242480,9606.ENSP00000244869,9606.ENSP00000245919,9606.ENSP00000249356,9606.ENSP00000252809,9606.ENSP00000253063,9606.ENSP00000256458,9606.ENSP00000261845,9606.ENSP00000263056,9606.ENSP00000263339,…	KRT20,PPP1R15A,XBP1,FKBP14,IL10RA,PRDM4,HBEGF,MSH6,DUSP1,EGR2,EREG,FOSB,DNAJB9,GDF15,SESN2,IRAK2,MAPK6,MAP3K8,IL1A,SIK1,RHOB,CSRNP1,PLK2,NRBF2,DUSP6,CXCL3,CXCL8,EIF2AK3,DDIT4,FOSL1,NFKBIB,ZFAND2A,TNFRSF12A,YOD1,RAB12,ATF3,PEAR1,INSIG1,RASSF1,EPHA2,PTGS2,RGS16,SGK1,CTGF,MCL1,DUSP5,GADD45A,JUN,ANKRD1,ZC3H12A,TSPYL2,RND3,ERRFI1,EDN1,PIGA,TDG,HRH1,VIMP,NABP1,ESRP1,HERPUD1,TIPARP,AMOTL2,CDKN2AIP,CXCL2…
GO:0001568	blood vessel development	16	464	0.7	6.75e-06	9606.ENSP00000216037,9606.ENSP00000244869,9606.ENSP00000272233,9606.ENSP00000306512,9606.ENSP00000307235,9606.ENSP00000310170,9606.ENSP00000326737,9606.ENSP00000351209,9606.ENSP00000356438,9606.ENSP00000356954,9606.ENSP00000360266,9606.ENSP00000362179,9606.ENSP00000368683,9606.ENSP00000398736,9606.ENSP00000420612,9606.ENSP00000448665	XBP1,EREG,RHOB,CXCL8,EIF2AK3,FOSL1,TNFRSF12A,EPHA2,PTGS2,CTGF,JUN,ZC3H12A,EDN1,CYR61,TIPARP,DDIT3
GO:0001525	angiogenesis	13	297	0.8	7.63e-06	9606.ENSP00000216037,9606.ENSP00000244869,9606.ENSP00000272233,9606.ENSP00000306512,9606.ENSP00000307235,9606.ENSP00000326737,9606.ENSP00000351209,9606.ENSP00000356438,9606.ENSP00000356954,9606.ENSP00000360266,9606.ENSP00000362179,9606.ENSP00000368683,9606.ENSP00000398736	XBP1,EREG,RHOB,CXCL8,EIF2AK3,TNFRSF12A,EPHA2,PTGS2,CTGF,JUN,ZC3H12A,EDN1,CYR61
GO:0010556	regulation of macromolecule biosynthetic process	55	4143	0.28	8.14e-06	9606.ENSP00000200453,9606.ENSP00000216037,9606.ENSP00000228437,9606.ENSP00000230990,9606.ENSP00000239223,9606.ENSP00000242480,9606.ENSP00000244869,9606.ENSP00000245919,9606.ENSP00000252809,9606.ENSP00000253063,9606.ENSP00000256458,9606.ENSP00000256495,9606.ENSP00000263339,9606.ENSP00000264444,9606.ENSP00000270162,9606.ENSP00000273153,9606.ENSP00000273668,9606.ENSP00000277746,9606.ENSP00000307235,…	PPP1R15A,XBP1,PRDM4,HBEGF,DUSP1,EGR2,EREG,FOSB,GDF15,SESN2,IRAK2,BHLHE40,IL1A,MXD1,SIK1,CSRNP1,EAF2,NRBF2,EIF2AK3,FOSL1,NFKBIB,SERTAD3,HIST1H1B,OVOL1,ZBTB49,ATF3,INSIG1,MAFF,CREB5,SERTAD1,HIST1H2AG,ZNF460,TSC22D2,SGK1,JUN,ANKRD1,TSC22D3,ZC3H12A,ZBTB43,TSPYL2,ZNF165,ERRFI1,EDN1,ZMYM5,TDG,VIMP,ZNF527,CYR61,KLF6,UBC,DDIT3,ZNF699,DNAJC3,TNFAIP3,NR4A3
GO:0035970	peptidyl-threonine dephosphorylation	5	16	1.66	8.8e-06	9606.ENSP00000239223,9606.ENSP00000240100,9606.ENSP00000355866,9606.ENSP00000358596,9606.ENSP00000379503	DUSP1,DUSP4,DUSP10,DUSP5,PDP1
GO:0009628	response to abiotic stimulus	24	1052	0.52	9.34e-06	9606.ENSP00000234420,9606.ENSP00000239223,9606.ENSP00000245919,9606.ENSP00000256495,9606.ENSP00000263339,9606.ENSP00000270162,9606.ENSP00000272233,9606.ENSP00000307235,9606.ENSP00000307305,9606.ENSP00000310170,9606.ENSP00000354543,9606.ENSP00000356438,9606.ENSP00000356954,9606.ENSP00000360025,9606.ENSP00000360266,9606.ENSP00000360762,9606.ENSP00000361458,9606.ENSP00000366702,9606.ENSP00000368683,…	MSH6,DUSP1,FOSB,BHLHE40,IL1A,SIK1,RHOB,EIF2AK3,DDIT4,FOSL1,TSC22D2,PTGS2,CTGF,GADD45A,JUN,ANKRD1,TSC22D3,ERRFI1,EDN1,HRH1,NABP1,UBC,DNAJC3,MAP3K14
GO:0071900	regulation of protein serine/threonine kinase activity	16	488	0.68	1.23e-05	9606.ENSP00000239223,9606.ENSP00000240100,9606.ENSP00000252809,9606.ENSP00000253063,9606.ENSP00000256458,9606.ENSP00000263056,9606.ENSP00000279488,9606.ENSP00000342344,9606.ENSP00000350633,9606.ENSP00000355866,9606.ENSP00000358596,9606.ENSP00000360025,9606.ENSP00000368683,9606.ENSP00000441543,9606.ENSP00000481570,9606.ENSP00000482657	DUSP1,DUSP4,GDF15,SESN2,IRAK2,MAP3K8,DUSP6,CCNYL1,SERTAD1,DUSP10,DUSP5,GADD45A,EDN1,UBC,TNFAIP3,MAP3K14
GO:0051248	negative regulation of protein metabolic process	24	1075	0.51	1.34e-05	9606.ENSP00000200453,9606.ENSP00000216037,9606.ENSP00000230990,9606.ENSP00000239223,9606.ENSP00000240100,9606.ENSP00000253063,9606.ENSP00000279488,9606.ENSP00000307235,9606.ENSP00000307305,9606.ENSP00000326813,9606.ENSP00000344352,9606.ENSP00000344967,9606.ENSP00000355866,9606.ENSP00000356438,9606.ENSP00000358596,9606.ENSP00000360025,9606.ENSP00000360266,9606.ENSP00000362179,9606.ENSP00000366702,…	PPP1R15A,XBP1,HBEGF,DUSP1,DUSP4,SESN2,DUSP6,EIF2AK3,DDIT4,YOD1,ATF3,SPRY4,DUSP10,PTGS2,DUSP5,GADD45A,JUN,ZC3H12A,ERRFI1,EDN1,XDH,HERPUD1,DNAJC3,TNFAIP3
GO:0009891	positive regulation of biosynthetic process	33	1876	0.41	1.47e-05	9606.ENSP00000200453,9606.ENSP00000216037,9606.ENSP00000228437,9606.ENSP00000242480,9606.ENSP00000244869,9606.ENSP00000245919,9606.ENSP00000253063,9606.ENSP00000263339,9606.ENSP00000273153,9606.ENSP00000273668,9606.ENSP00000307235,9606.ENSP00000310170,9606.ENSP00000312988,9606.ENSP00000325414,9606.ENSP00000338807,9606.ENSP00000344352,9606.ENSP00000344741,9606.ENSP00000345393,9606.ENSP00000350359,…	PPP1R15A,XBP1,PRDM4,EGR2,EREG,FOSB,SESN2,IL1A,CSRNP1,EAF2,EIF2AK3,FOSL1,NFKBIB,SERTAD3,ZBTB49,ATF3,INSIG1,MAFF,CREB5,SERTAD1,PTGS2,CTGF,JUN,ANKRD1,ZC3H12A,EDN1,HRH1,CYR61,KLF6,UBC,DDIT3,DNAJC3,NR4A3
GO:0045936	negative regulation of phosphate metabolic process	17	562	0.64	1.49e-05	9606.ENSP00000200453,9606.ENSP00000216037,9606.ENSP00000239223,9606.ENSP00000240100,9606.ENSP00000279488,9606.ENSP00000307305,9606.ENSP00000344352,9606.ENSP00000344967,9606.ENSP00000355866,9606.ENSP00000358596,9606.ENSP00000360025,9606.ENSP00000360266,9606.ENSP00000362179,9606.ENSP00000366702,9606.ENSP00000368727,9606.ENSP00000473631,9606.ENSP00000481570	PPP1R15A,XBP1,DUSP1,DUSP4,DUSP6,DDIT4,ATF3,SPRY4,DUSP10,DUSP5,GADD45A,JUN,ZC3H12A,ERRFI1,XDH,DNAJC3,TNFAIP3
GO:0051252	regulation of RNA metabolic process	52	3890	0.29	1.61e-05	9606.ENSP00000216037,9606.ENSP00000228437,9606.ENSP00000242480,9606.ENSP00000244869,9606.ENSP00000245919,9606.ENSP00000252809,9606.ENSP00000253063,9606.ENSP00000256458,9606.ENSP00000256495,9606.ENSP00000263339,9606.ENSP00000264444,9606.ENSP00000270162,9606.ENSP00000273153,9606.ENSP00000273668,9606.ENSP00000277746,9606.ENSP00000307235,9606.ENSP00000310170,9606.ENSP00000312988,9606.ENSP00000325414,…	XBP1,PRDM4,EGR2,EREG,FOSB,GDF15,SESN2,IRAK2,BHLHE40,IL1A,MXD1,SIK1,CSRNP1,EAF2,NRBF2,EIF2AK3,FOSL1,NFKBIB,SERTAD3,HIST1H1B,OVOL1,ZBTB49,ATF3,INSIG1,MAFF,CREB5,SERTAD1,HIST1H2AG,ZNF460,TSC22D2,SGK1,PTBP2,JUN,ANKRD1,TSC22D3,ZC3H12A,ZBTB43,TSPYL2,ZNF165,EDN1,ZMYM5,TDG,ZNF527,CYR61,ESRP1,KLF6,USP36,UBC,DDIT3,ZNF699,TNFAIP3,NR4A3
GO:0032269	negative regulation of cellular protein metabolic process	23	1014	0.52	1.76e-05	9606.ENSP00000200453,9606.ENSP00000216037,9606.ENSP00000239223,9606.ENSP00000240100,9606.ENSP00000253063,9606.ENSP00000279488,9606.ENSP00000307235,9606.ENSP00000307305,9606.ENSP00000326813,9606.ENSP00000344352,9606.ENSP00000344967,9606.ENSP00000355866,9606.ENSP00000356438,9606.ENSP00000358596,9606.ENSP00000360025,9606.ENSP00000360266,9606.ENSP00000362179,9606.ENSP00000366702,9606.ENSP00000368683,…	PPP1R15A,XBP1,DUSP1,DUSP4,SESN2,DUSP6,EIF2AK3,DDIT4,YOD1,ATF3,SPRY4,DUSP10,PTGS2,DUSP5,GADD45A,JUN,ZC3H12A,ERRFI1,EDN1,XDH,HERPUD1,DNAJC3,TNFAIP3
GO:0048514	blood vessel morphogenesis	14	381	0.73	1.76e-05	9606.ENSP00000216037,9606.ENSP00000244869,9606.ENSP00000272233,9606.ENSP00000306512,9606.ENSP00000307235,9606.ENSP00000326737,9606.ENSP00000351209,9606.ENSP00000356438,9606.ENSP00000356954,9606.ENSP00000360266,9606.ENSP00000362179,9606.ENSP00000368683,9606.ENSP00000398736,9606.ENSP00000420612	XBP1,EREG,RHOB,CXCL8,EIF2AK3,TNFRSF12A,EPHA2,PTGS2,CTGF,JUN,ZC3H12A,EDN1,CYR61,TIPARP
GO:0071216	cellular response to biotic stimulus	10	176	0.92	1.9e-05	9606.ENSP00000216037,9606.ENSP00000256458,9606.ENSP00000306512,9606.ENSP00000307235,9606.ENSP00000312988,9606.ENSP00000360762,9606.ENSP00000362179,9606.ENSP00000381282,9606.ENSP00000448665,9606.ENSP00000481570	XBP1,IRAK2,CXCL8,EIF2AK3,NFKBIB,ANKRD1,ZC3H12A,VIMP,DDIT3,TNFAIP3
GO:2000112	regulation of cellular macromolecule biosynthetic process	53	4050	0.28	2.21e-05	9606.ENSP00000200453,9606.ENSP00000216037,9606.ENSP00000228437,9606.ENSP00000230990,9606.ENSP00000239223,9606.ENSP00000242480,9606.ENSP00000244869,9606.ENSP00000245919,9606.ENSP00000252809,9606.ENSP00000253063,9606.ENSP00000256458,9606.ENSP00000256495,9606.ENSP00000263339,9606.ENSP00000264444,9606.ENSP00000270162,9606.ENSP00000273153,9606.ENSP00000273668,9606.ENSP00000277746,9606.ENSP00000307235,…	PPP1R15A,XBP1,PRDM4,HBEGF,DUSP1,EGR2,EREG,FOSB,GDF15,SESN2,IRAK2,BHLHE40,IL1A,MXD1,SIK1,CSRNP1,EAF2,NRBF2,EIF2AK3,FOSL1,SERTAD3,HIST1H1B,OVOL1,ZBTB49,ATF3,INSIG1,MAFF,CREB5,SERTAD1,HIST1H2AG,ZNF460,TSC22D2,SGK1,JUN,ANKRD1,TSC22D3,ZC3H12A,ZBTB43,TSPYL2,ZNF165,EDN1,ZMYM5,TDG,VIMP,ZNF527,CYR61,KLF6,UBC,DDIT3,ZNF699,DNAJC3,TNFAIP3,NR4A3
GO:0010468	regulation of gene expression	57	4533	0.26	2.37e-05	9606.ENSP00000200453,9606.ENSP00000216037,9606.ENSP00000228437,9606.ENSP00000242480,9606.ENSP00000244869,9606.ENSP00000245919,9606.ENSP00000252809,9606.ENSP00000253063,9606.ENSP00000256458,9606.ENSP00000256495,9606.ENSP00000261845,9606.ENSP00000263339,9606.ENSP00000264444,9606.ENSP00000270162,9606.ENSP00000273153,9606.ENSP00000273668,9606.ENSP00000277746,9606.ENSP00000307235,9606.ENSP00000310170,…	PPP1R15A,XBP1,PRDM4,EGR2,EREG,FOSB,GDF15,SESN2,IRAK2,BHLHE40,MAPK6,IL1A,MXD1,SIK1,CSRNP1,EAF2,NRBF2,EIF2AK3,FOSL1,SERTAD3,HIST1H1B,OVOL1,ZBTB49,ATF3,INSIG1,MAFF,CREB5,SERTAD1,HIST1H2AG,ZNF460,TSC22D2,SGK1,CTGF,PTBP2,JUN,ANKRD1,TSC22D3,ZC3H12A,ZBTB43,TSPYL2,ZNF165,EDN1,XDH,ZMYM5,TDG,ZNF527,CYR61,ESRP1,KLF6,TIPARP,USP36,UBC,DDIT3,ZNF699,DNAJC3,TNFAIP3,NR4A3
GO:0044237	cellular metabolic process	89	8797	0.17	2.39e-05	9606.ENSP00000075120,9606.ENSP00000200453,9606.ENSP00000216037,9606.ENSP00000222803,9606.ENSP00000228437,9606.ENSP00000230990,9606.ENSP00000234420,9606.ENSP00000239223,9606.ENSP00000240100,9606.ENSP00000242480,9606.ENSP00000244869,9606.ENSP00000245919,9606.ENSP00000249356,9606.ENSP00000253063,9606.ENSP00000256458,9606.ENSP00000256495,9606.ENSP00000261845,9606.ENSP00000263056,9606.ENSP00000263960,…	SLC2A3,PPP1R15A,XBP1,FKBP14,PRDM4,HBEGF,MSH6,DUSP1,DUSP4,EGR2,EREG,FOSB,DNAJB9,SESN2,IRAK2,BHLHE40,MAPK6,MAP3K8,COQ10B,MXD1,SIK1,CSRNP1,EAF2,PLK2,NRBF2,ZC3H12C,DUSP6,CXCL8,EIF2AK3,DDIT4,FOSL1,FUT1,NFKBIB,SERTAD3,YOD1,RAB12,OVOL1,ZBTB49,ATF3,INSIG1,MAFF,CREB5,SERTAD1,EPHA2,ZNF460,DUSP10,PTGS2,SGK1,UAP1,CTGF,DUSP5,PTBP2,GADD45A,JUN,LONRF3,YRDC,SLC25A25,ZC3H12A,ZBTB43,TSPYL2,ZNF165,GPCPD1,EDN1,XDH,P…
GO:0031400	negative regulation of protein modification process	17	592	0.62	2.74e-05	9606.ENSP00000200453,9606.ENSP00000216037,9606.ENSP00000239223,9606.ENSP00000240100,9606.ENSP00000279488,9606.ENSP00000307305,9606.ENSP00000344352,9606.ENSP00000344967,9606.ENSP00000355866,9606.ENSP00000358596,9606.ENSP00000360025,9606.ENSP00000360266,9606.ENSP00000362179,9606.ENSP00000366702,9606.ENSP00000368727,9606.ENSP00000473631,9606.ENSP00000481570	PPP1R15A,XBP1,DUSP1,DUSP4,DUSP6,DDIT4,ATF3,SPRY4,DUSP10,DUSP5,GADD45A,JUN,ZC3H12A,ERRFI1,XDH,DNAJC3,TNFAIP3
GO:0031328	positive regulation of cellular biosynthetic process	32	1846	0.4	2.82e-05	9606.ENSP00000200453,9606.ENSP00000216037,9606.ENSP00000228437,9606.ENSP00000242480,9606.ENSP00000244869,9606.ENSP00000245919,9606.ENSP00000253063,9606.ENSP00000263339,9606.ENSP00000273153,9606.ENSP00000273668,9606.ENSP00000307235,9606.ENSP00000310170,9606.ENSP00000312988,9606.ENSP00000325414,9606.ENSP00000338807,9606.ENSP00000344352,9606.ENSP00000344741,9606.ENSP00000345393,9606.ENSP00000350359,…	PPP1R15A,XBP1,PRDM4,EGR2,EREG,FOSB,SESN2,IL1A,CSRNP1,EAF2,EIF2AK3,FOSL1,NFKBIB,SERTAD3,ZBTB49,ATF3,INSIG1,MAFF,CREB5,SERTAD1,PTGS2,JUN,ANKRD1,ZC3H12A,EDN1,HRH1,CYR61,KLF6,UBC,DDIT3,DNAJC3,NR4A3
GO:0031327	negative regulation of cellular biosynthetic process	28	1479	0.44	2.91e-05	9606.ENSP00000216037,9606.ENSP00000230990,9606.ENSP00000239223,9606.ENSP00000244869,9606.ENSP00000245919,9606.ENSP00000253063,9606.ENSP00000256495,9606.ENSP00000264444,9606.ENSP00000270162,9606.ENSP00000307235,9606.ENSP00000307305,9606.ENSP00000330074,9606.ENSP00000337862,9606.ENSP00000344352,9606.ENSP00000344741,9606.ENSP00000352119,9606.ENSP00000360266,9606.ENSP00000360762,9606.ENSP00000361458,…	XBP1,HBEGF,DUSP1,EREG,FOSB,SESN2,BHLHE40,MXD1,SIK1,EIF2AK3,DDIT4,HIST1H1B,OVOL1,ATF3,INSIG1,HIST1H2AG,JUN,ANKRD1,TSC22D3,ZC3H12A,TSPYL2,ERRFI1,EDN1,TDG,VIMP,UBC,DDIT3,NR4A3
GO:0001558	regulation of cell growth	14	402	0.7	2.99e-05	9606.ENSP00000216037,9606.ENSP00000230990,9606.ENSP00000253063,9606.ENSP00000273668,9606.ENSP00000325414,9606.ENSP00000326737,9606.ENSP00000330074,9606.ENSP00000355374,9606.ENSP00000356832,9606.ENSP00000356954,9606.ENSP00000364591,9606.ENSP00000368683,9606.ENSP00000398736,9606.ENSP00000427108	XBP1,HBEGF,SESN2,EAF2,SERTAD3,TNFRSF12A,HIST1H1B,OSGIN1,SGK1,CTGF,TSPYL2,EDN1,CYR61,CDKN2AIP
GO:0048584	positive regulation of response to stimulus	34	2054	0.38	3.24e-05	9606.ENSP00000200453,9606.ENSP00000216037,9606.ENSP00000230990,9606.ENSP00000234420,9606.ENSP00000244869,9606.ENSP00000252809,9606.ENSP00000256458,9606.ENSP00000263056,9606.ENSP00000264711,9606.ENSP00000279488,9606.ENSP00000296026,9606.ENSP00000306512,9606.ENSP00000321026,9606.ENSP00000326737,9606.ENSP00000344352,9606.ENSP00000356438,9606.ENSP00000356954,9606.ENSP00000358022,9606.ENSP00000358596,…	PPP1R15A,XBP1,HBEGF,MSH6,EREG,GDF15,IRAK2,MAP3K8,DNAJC27,DUSP6,CXCL3,CXCL8,LURAP1L,TNFRSF12A,ATF3,PTGS2,CTGF,MCL1,DUSP5,GADD45A,JUN,ANKRD1,ZC3H12A,EDN1,XDH,CYR61,HERPUD1,CDKN2AIP,CXCL2,UBC,DDIT3,TNFAIP3,NR4A3,MAP3K14
GO:0031401	positive regulation of protein modification process	24	1149	0.48	3.65e-05	9606.ENSP00000200453,9606.ENSP00000216037,9606.ENSP00000230990,9606.ENSP00000244869,9606.ENSP00000252809,9606.ENSP00000256458,9606.ENSP00000263056,9606.ENSP00000264711,9606.ENSP00000265138,9606.ENSP00000279488,9606.ENSP00000330074,9606.ENSP00000349547,9606.ENSP00000356438,9606.ENSP00000356954,9606.ENSP00000358596,9606.ENSP00000360025,9606.ENSP00000360266,9606.ENSP00000362179,9606.ENSP00000368683,…	PPP1R15A,XBP1,HBEGF,EREG,GDF15,IRAK2,MAP3K8,DNAJC27,ARRDC3,DUSP6,HIST1H1B,RASSF1,PTGS2,CTGF,DUSP5,GADD45A,JUN,ZC3H12A,EDN1,XDH,CYR61,DCUN1D2,UBC,MAP3K14
GO:0043170	macromolecule metabolic process	79	7453	0.19	3.67e-05	9606.ENSP00000200453,9606.ENSP00000216037,9606.ENSP00000222803,9606.ENSP00000228437,9606.ENSP00000230990,9606.ENSP00000234420,9606.ENSP00000239223,9606.ENSP00000240100,9606.ENSP00000242480,9606.ENSP00000244869,9606.ENSP00000245919,9606.ENSP00000249356,9606.ENSP00000253063,9606.ENSP00000256458,9606.ENSP00000256495,9606.ENSP00000261845,9606.ENSP00000263056,9606.ENSP00000264444,9606.ENSP00000270162,…	PPP1R15A,XBP1,FKBP14,PRDM4,HBEGF,MSH6,DUSP1,DUSP4,EGR2,EREG,FOSB,DNAJB9,SESN2,IRAK2,BHLHE40,MAPK6,MAP3K8,MXD1,SIK1,CSRNP1,EAF2,PLK2,NRBF2,ZC3H12C,DUSP6,CXCL8,EIF2AK3,FOSL1,FUT1,NFKBIB,SERTAD3,YOD1,RAB12,OVOL1,ZBTB49,ATF3,MAFF,CREB5,SERTAD1,EPHA2,ZNF460,DUSP10,SGK1,CTGF,DUSP5,PTBP2,GADD45A,JUN,LONRF3,YRDC,ZC3H12A,ZBTB43,TSPYL2,ZNF165,PIGA,ZMYM5,TDG,VCPKMT,PDP1,VIMP,ZNF527,CYR61,NABP1,ESRP1,HERPUD1…
GO:0007165	signal transduction	58	4738	0.25	4.01e-05	9606.ENSP00000200453,9606.ENSP00000216037,9606.ENSP00000222803,9606.ENSP00000227752,9606.ENSP00000228437,9606.ENSP00000230990,9606.ENSP00000234420,9606.ENSP00000239223,9606.ENSP00000244869,9606.ENSP00000249356,9606.ENSP00000252809,9606.ENSP00000253063,9606.ENSP00000256458,9606.ENSP00000261845,9606.ENSP00000263056,9606.ENSP00000263339,9606.ENSP00000270162,9606.ENSP00000272233,9606.ENSP00000273153,…	PPP1R15A,XBP1,FKBP14,IL10RA,PRDM4,HBEGF,MSH6,DUSP1,EREG,DNAJB9,GDF15,SESN2,IRAK2,MAPK6,MAP3K8,IL1A,SIK1,RHOB,CSRNP1,PLK2,DUSP6,CXCL3,CXCL8,EIF2AK3,DDIT4,NFKBIB,TNFRSF12A,YOD1,ATF3,PEAR1,INSIG1,RASSF1,EPHA2,PTGS2,RGS16,SGK1,CTGF,MCL1,DUSP5,GADD45A,JUN,ZC3H12A,TSPYL2,RND3,EDN1,HRH1,VIMP,ESRP1,HERPUD1,TIPARP,AMOTL2,CXCL2,UBC,DDIT3,DNAJC3,TNFAIP3,NR4A3,MAP3K14
GO:1903506	regulation of nucleic acid-templated transcription	49	3683	0.29	4.16e-05	9606.ENSP00000216037,9606.ENSP00000228437,9606.ENSP00000242480,9606.ENSP00000244869,9606.ENSP00000245919,9606.ENSP00000252809,9606.ENSP00000253063,9606.ENSP00000256458,9606.ENSP00000256495,9606.ENSP00000263339,9606.ENSP00000264444,9606.ENSP00000270162,9606.ENSP00000273153,9606.ENSP00000273668,9606.ENSP00000277746,9606.ENSP00000307235,9606.ENSP00000310170,9606.ENSP00000312988,9606.ENSP00000325414,…	XBP1,PRDM4,EGR2,EREG,FOSB,GDF15,SESN2,IRAK2,BHLHE40,IL1A,MXD1,SIK1,CSRNP1,EAF2,NRBF2,EIF2AK3,FOSL1,NFKBIB,SERTAD3,HIST1H1B,OVOL1,ZBTB49,ATF3,INSIG1,MAFF,CREB5,SERTAD1,HIST1H2AG,ZNF460,TSC22D2,SGK1,JUN,ANKRD1,TSC22D3,ZC3H12A,ZBTB43,TSPYL2,ZNF165,EDN1,ZMYM5,TDG,ZNF527,CYR61,KLF6,UBC,DDIT3,ZNF699,TNFAIP3,NR4A3
GO:1901700	response to oxygen-containing compound	27	1427	0.44	4.4e-05	9606.ENSP00000216037,9606.ENSP00000227752,9606.ENSP00000239223,9606.ENSP00000242480,9606.ENSP00000244869,9606.ENSP00000245919,9606.ENSP00000253063,9606.ENSP00000256458,9606.ENSP00000272233,9606.ENSP00000296026,9606.ENSP00000306512,9606.ENSP00000307305,9606.ENSP00000310170,9606.ENSP00000312988,9606.ENSP00000344741,9606.ENSP00000355866,9606.ENSP00000356438,9606.ENSP00000356954,9606.ENSP00000360266,…	XBP1,IL10RA,DUSP1,EGR2,EREG,FOSB,SESN2,IRAK2,RHOB,CXCL3,CXCL8,DDIT4,FOSL1,NFKBIB,INSIG1,DUSP10,PTGS2,CTGF,JUN,ANKRD1,ZC3H12A,ERRFI1,EDN1,VIMP,CXCL2,TNFAIP3,NR4A3
GO:0071496	cellular response to external stimulus	12	305	0.76	5.05e-05	9606.ENSP00000167588,9606.ENSP00000216037,9606.ENSP00000253063,9606.ENSP00000307235,9606.ENSP00000310170,9606.ENSP00000344352,9606.ENSP00000356438,9606.ENSP00000360025,9606.ENSP00000360266,9606.ENSP00000360762,9606.ENSP00000362179,9606.ENSP00000482657	KRT20,XBP1,SESN2,EIF2AK3,FOSL1,ATF3,PTGS2,GADD45A,JUN,ANKRD1,ZC3H12A,MAP3K14
GO:0000188	inactivation of MAPK activity	5	26	1.45	5.35e-05	9606.ENSP00000239223,9606.ENSP00000240100,9606.ENSP00000279488,9606.ENSP00000355866,9606.ENSP00000358596	DUSP1,DUSP4,DUSP6,DUSP10,DUSP5
GO:0048661	positive regulation of smooth muscle cell proliferation	7	80	1.1	5.77e-05	9606.ENSP00000216037,9606.ENSP00000230990,9606.ENSP00000244869,9606.ENSP00000356438,9606.ENSP00000360266,9606.ENSP00000368683,9606.ENSP00000482027	XBP1,HBEGF,EREG,PTGS2,JUN,EDN1,NR4A3
GO:0043409	negative regulation of MAPK cascade	9	158	0.92	5.82e-05	9606.ENSP00000216037,9606.ENSP00000239223,9606.ENSP00000240100,9606.ENSP00000279488,9606.ENSP00000344352,9606.ENSP00000344967,9606.ENSP00000355866,9606.ENSP00000358596,9606.ENSP00000366702	XBP1,DUSP1,DUSP4,DUSP6,ATF3,SPRY4,DUSP10,DUSP5,ERRFI1
GO:0050896	response to stimulus	81	7824	0.18	5.83e-05	9606.ENSP00000075120,9606.ENSP00000167588,9606.ENSP00000200453,9606.ENSP00000216037,9606.ENSP00000222803,9606.ENSP00000227752,9606.ENSP00000228437,9606.ENSP00000230990,9606.ENSP00000234420,9606.ENSP00000239223,9606.ENSP00000242480,9606.ENSP00000244869,9606.ENSP00000245919,9606.ENSP00000249356,9606.ENSP00000252809,9606.ENSP00000253063,9606.ENSP00000256458,9606.ENSP00000256495,9606.ENSP00000261845,…	SLC2A3,KRT20,PPP1R15A,XBP1,FKBP14,IL10RA,PRDM4,HBEGF,MSH6,DUSP1,EGR2,EREG,FOSB,DNAJB9,GDF15,SESN2,IRAK2,BHLHE40,MAPK6,MAP3K8,IL1A,SIK1,RHOB,CSRNP1,PLK2,NRBF2,DUSP6,CXCL3,CXCL8,EIF2AK3,DDIT4,FOSL1,NFKBIB,ZFAND2A,TNFRSF12A,YOD1,RAB12,ATF3,PEAR1,INSIG1,MAFF,RASSF1,EPHA2,TSC22D2,DUSP10,PTGS2,RGS16,SGK1,CTGF,MCL1,DUSP5,GADD45A,JUN,ANKRD1,TSC22D3,SLC25A25,ZC3H12A,TSPYL2,RND3,ERRFI1,EDN1,PIGA,TDG,HRH1,V…
GO:0006355	regulation of transcription, DNA-templated	48	3661	0.28	7.97e-05	9606.ENSP00000216037,9606.ENSP00000228437,9606.ENSP00000242480,9606.ENSP00000244869,9606.ENSP00000245919,9606.ENSP00000252809,9606.ENSP00000253063,9606.ENSP00000256458,9606.ENSP00000256495,9606.ENSP00000263339,9606.ENSP00000264444,9606.ENSP00000270162,9606.ENSP00000273153,9606.ENSP00000273668,9606.ENSP00000277746,9606.ENSP00000307235,9606.ENSP00000310170,9606.ENSP00000325414,9606.ENSP00000330074,…	XBP1,PRDM4,EGR2,EREG,FOSB,GDF15,SESN2,IRAK2,BHLHE40,IL1A,MXD1,SIK1,CSRNP1,EAF2,NRBF2,EIF2AK3,FOSL1,SERTAD3,HIST1H1B,OVOL1,ZBTB49,ATF3,INSIG1,MAFF,CREB5,SERTAD1,HIST1H2AG,ZNF460,TSC22D2,SGK1,JUN,ANKRD1,TSC22D3,ZC3H12A,ZBTB43,TSPYL2,ZNF165,EDN1,ZMYM5,TDG,ZNF527,CYR61,KLF6,UBC,DDIT3,ZNF699,TNFAIP3,NR4A3
GO:0007154	cell communication	61	5219	0.23	7.97e-05	9606.ENSP00000167588,9606.ENSP00000200453,9606.ENSP00000216037,9606.ENSP00000222803,9606.ENSP00000227752,9606.ENSP00000228437,9606.ENSP00000230990,9606.ENSP00000234420,9606.ENSP00000239223,9606.ENSP00000244869,9606.ENSP00000249356,9606.ENSP00000252809,9606.ENSP00000253063,9606.ENSP00000256458,9606.ENSP00000261845,9606.ENSP00000263056,9606.ENSP00000263339,9606.ENSP00000270162,9606.ENSP00000272233,…	KRT20,PPP1R15A,XBP1,FKBP14,IL10RA,PRDM4,HBEGF,MSH6,DUSP1,EREG,DNAJB9,GDF15,SESN2,IRAK2,MAPK6,MAP3K8,IL1A,SIK1,RHOB,CSRNP1,PLK2,DUSP6,CXCL3,CXCL8,EIF2AK3,DDIT4,FOSL1,NFKBIB,TNFRSF12A,YOD1,ATF3,PEAR1,INSIG1,RASSF1,EPHA2,PTGS2,RGS16,SGK1,CTGF,MCL1,DUSP5,GADD45A,JUN,ZC3H12A,TSPYL2,RND3,EDN1,HRH1,VIMP,CYR61,ESRP1,HERPUD1,TIPARP,AMOTL2,CXCL2,UBC,DDIT3,DNAJC3,TNFAIP3,NR4A3,MAP3K14
GO:0010557	positive regulation of macromolecule biosynthetic process	30	1758	0.39	7.97e-05	9606.ENSP00000200453,9606.ENSP00000216037,9606.ENSP00000228437,9606.ENSP00000242480,9606.ENSP00000244869,9606.ENSP00000245919,9606.ENSP00000253063,9606.ENSP00000263339,9606.ENSP00000273153,9606.ENSP00000273668,9606.ENSP00000307235,9606.ENSP00000310170,9606.ENSP00000312988,9606.ENSP00000325414,9606.ENSP00000338807,9606.ENSP00000344352,9606.ENSP00000344741,9606.ENSP00000345393,9606.ENSP00000350359,…	PPP1R15A,XBP1,PRDM4,EGR2,EREG,FOSB,SESN2,IL1A,CSRNP1,EAF2,EIF2AK3,FOSL1,NFKBIB,SERTAD3,ZBTB49,ATF3,INSIG1,MAFF,CREB5,SERTAD1,JUN,ANKRD1,ZC3H12A,EDN1,CYR61,KLF6,UBC,DDIT3,DNAJC3,NR4A3
GO:1902533	positive regulation of intracellular signal transduction	21	959	0.5	7.97e-05	9606.ENSP00000216037,9606.ENSP00000230990,9606.ENSP00000244869,9606.ENSP00000252809,9606.ENSP00000256458,9606.ENSP00000263056,9606.ENSP00000264711,9606.ENSP00000279488,9606.ENSP00000321026,9606.ENSP00000356954,9606.ENSP00000358022,9606.ENSP00000358596,9606.ENSP00000360025,9606.ENSP00000360266,9606.ENSP00000360762,9606.ENSP00000362179,9606.ENSP00000368683,9606.ENSP00000368727,9606.ENSP00000441543,…	XBP1,HBEGF,EREG,GDF15,IRAK2,MAP3K8,DNAJC27,DUSP6,LURAP1L,CTGF,MCL1,DUSP5,GADD45A,JUN,ANKRD1,ZC3H12A,EDN1,XDH,UBC,DDIT3,MAP3K14
GO:0040012	regulation of locomotion	20	881	0.52	8.16e-05	9606.ENSP00000216037,9606.ENSP00000230990,9606.ENSP00000244869,9606.ENSP00000263339,9606.ENSP00000265138,9606.ENSP00000272233,9606.ENSP00000274289,9606.ENSP00000296026,9606.ENSP00000306512,9606.ENSP00000351209,9606.ENSP00000355866,9606.ENSP00000356438,9606.ENSP00000356832,9606.ENSP00000360266,9606.ENSP00000360672,9606.ENSP00000362179,9606.ENSP00000368683,9606.ENSP00000398736,9606.ENSP00000427279,…	XBP1,HBEGF,EREG,IL1A,ARRDC3,RHOB,PLK2,CXCL3,CXCL8,EPHA2,DUSP10,PTGS2,SGK1,JUN,PARD6B,ZC3H12A,EDN1,CYR61,CXCL2,NR4A3
GO:0071347	cellular response to interleukin-1	8	124	0.97	8.57e-05	9606.ENSP00000256458,9606.ENSP00000263056,9606.ENSP00000263339,9606.ENSP00000306512,9606.ENSP00000360762,9606.ENSP00000362179,9606.ENSP00000368683,9606.ENSP00000441543	IRAK2,MAP3K8,IL1A,CXCL8,ANKRD1,ZC3H12A,EDN1,UBC
GO:0072359	circulatory system development	19	807	0.53	8.69e-05	9606.ENSP00000216037,9606.ENSP00000244869,9606.ENSP00000270162,9606.ENSP00000272233,9606.ENSP00000306512,9606.ENSP00000307235,9606.ENSP00000310170,9606.ENSP00000326737,9606.ENSP00000351209,9606.ENSP00000356438,9606.ENSP00000356954,9606.ENSP00000360266,9606.ENSP00000360762,9606.ENSP00000362179,9606.ENSP00000366702,9606.ENSP00000368683,9606.ENSP00000398736,9606.ENSP00000420612,9606.ENSP00000448665	XBP1,EREG,SIK1,RHOB,CXCL8,EIF2AK3,FOSL1,TNFRSF12A,EPHA2,PTGS2,CTGF,JUN,ANKRD1,ZC3H12A,ERRFI1,EDN1,CYR61,TIPARP,DDIT3
GO:2000145	regulation of cell motility	19	807	0.53	8.69e-05	9606.ENSP00000216037,9606.ENSP00000230990,9606.ENSP00000244869,9606.ENSP00000263339,9606.ENSP00000272233,9606.ENSP00000274289,9606.ENSP00000296026,9606.ENSP00000306512,9606.ENSP00000351209,9606.ENSP00000355866,9606.ENSP00000356438,9606.ENSP00000356832,9606.ENSP00000360266,9606.ENSP00000360672,9606.ENSP00000362179,9606.ENSP00000368683,9606.ENSP00000398736,9606.ENSP00000427279,9606.ENSP00000482027	XBP1,HBEGF,EREG,IL1A,RHOB,PLK2,CXCL3,CXCL8,EPHA2,DUSP10,PTGS2,SGK1,JUN,PARD6B,ZC3H12A,EDN1,CYR61,CXCL2,NR4A3
GO:0030335	positive regulation of cell migration	14	452	0.65	9.31e-05	9606.ENSP00000216037,9606.ENSP00000230990,9606.ENSP00000263339,9606.ENSP00000272233,9606.ENSP00000274289,9606.ENSP00000296026,9606.ENSP00000306512,9606.ENSP00000356438,9606.ENSP00000360266,9606.ENSP00000362179,9606.ENSP00000368683,9606.ENSP00000398736,9606.ENSP00000427279,9606.ENSP00000482027	XBP1,HBEGF,IL1A,RHOB,PLK2,CXCL3,CXCL8,PTGS2,JUN,ZC3H12A,EDN1,CYR61,CXCL2,NR4A3
GO:0048660	regulation of smooth muscle cell proliferation	8	126	0.96	9.31e-05	9606.ENSP00000216037,9606.ENSP00000230990,9606.ENSP00000244869,9606.ENSP00000356438,9606.ENSP00000360266,9606.ENSP00000368683,9606.ENSP00000481570,9606.ENSP00000482027	XBP1,HBEGF,EREG,PTGS2,JUN,EDN1,TNFAIP3,NR4A3
GO:0040008	regulation of growth	17	663	0.57	9.64e-05	9606.ENSP00000216037,9606.ENSP00000230990,9606.ENSP00000252809,9606.ENSP00000253063,9606.ENSP00000273668,9606.ENSP00000279488,9606.ENSP00000325414,9606.ENSP00000326737,9606.ENSP00000330074,9606.ENSP00000355374,9606.ENSP00000355866,9606.ENSP00000356832,9606.ENSP00000356954,9606.ENSP00000364591,9606.ENSP00000368683,9606.ENSP00000398736,9606.ENSP00000427108	XBP1,HBEGF,GDF15,SESN2,EAF2,DUSP6,SERTAD3,TNFRSF12A,HIST1H1B,OSGIN1,DUSP10,SGK1,CTGF,TSPYL2,EDN1,CYR61,CDKN2AIP
GO:0030334	regulation of cell migration	18	753	0.54	0.00012	9606.ENSP00000216037,9606.ENSP00000230990,9606.ENSP00000263339,9606.ENSP00000272233,9606.ENSP00000274289,9606.ENSP00000296026,9606.ENSP00000306512,9606.ENSP00000351209,9606.ENSP00000355866,9606.ENSP00000356438,9606.ENSP00000356832,9606.ENSP00000360266,9606.ENSP00000360672,9606.ENSP00000362179,9606.ENSP00000368683,9606.ENSP00000398736,9606.ENSP00000427279,9606.ENSP00000482027	XBP1,HBEGF,IL1A,RHOB,PLK2,CXCL3,CXCL8,EPHA2,DUSP10,PTGS2,SGK1,JUN,PARD6B,ZC3H12A,EDN1,CYR61,CXCL2,NR4A3
GO:0043405	regulation of MAP kinase activity	12	337	0.71	0.00012	9606.ENSP00000239223,9606.ENSP00000240100,9606.ENSP00000252809,9606.ENSP00000256458,9606.ENSP00000263056,9606.ENSP00000279488,9606.ENSP00000355866,9606.ENSP00000358596,9606.ENSP00000360025,9606.ENSP00000368683,9606.ENSP00000441543,9606.ENSP00000482657	DUSP1,DUSP4,GDF15,IRAK2,MAP3K8,DUSP6,DUSP10,DUSP5,GADD45A,EDN1,UBC,MAP3K14
GO:0048646	anatomical structure formation involved in morphogenesis	19	831	0.52	0.00012	9606.ENSP00000216037,9606.ENSP00000239223,9606.ENSP00000240100,9606.ENSP00000242480,9606.ENSP00000244869,9606.ENSP00000272233,9606.ENSP00000306512,9606.ENSP00000307235,9606.ENSP00000326737,9606.ENSP00000351209,9606.ENSP00000356438,9606.ENSP00000356954,9606.ENSP00000358596,9606.ENSP00000360266,9606.ENSP00000360762,9606.ENSP00000362179,9606.ENSP00000368683,9606.ENSP00000398736,9606.ENSP00000482027	XBP1,DUSP1,DUSP4,EGR2,EREG,RHOB,CXCL8,EIF2AK3,TNFRSF12A,EPHA2,PTGS2,CTGF,DUSP5,JUN,ANKRD1,ZC3H12A,EDN1,CYR61,NR4A3
GO:1902235	regulation of endoplasmic reticulum stress-induced intrinsic apoptotic signaling pathway	5	32	1.35	0.00012	9606.ENSP00000216037,9606.ENSP00000307235,9606.ENSP00000381282,9606.ENSP00000409555,9606.ENSP00000448665	XBP1,EIF2AK3,VIMP,HERPUD1,DDIT3
GO:1903508	positive regulation of nucleic acid-templated transcription	27	1520	0.41	0.00012	9606.ENSP00000216037,9606.ENSP00000228437,9606.ENSP00000242480,9606.ENSP00000245919,9606.ENSP00000253063,9606.ENSP00000263339,9606.ENSP00000273153,9606.ENSP00000273668,9606.ENSP00000307235,9606.ENSP00000310170,9606.ENSP00000312988,9606.ENSP00000325414,9606.ENSP00000338807,9606.ENSP00000344352,9606.ENSP00000344741,9606.ENSP00000345393,9606.ENSP00000350359,9606.ENSP00000350633,9606.ENSP00000360266,…	XBP1,PRDM4,EGR2,FOSB,SESN2,IL1A,CSRNP1,EAF2,EIF2AK3,FOSL1,NFKBIB,SERTAD3,ZBTB49,ATF3,INSIG1,MAFF,CREB5,SERTAD1,JUN,ANKRD1,ZC3H12A,EDN1,CYR61,KLF6,UBC,DDIT3,NR4A3
GO:0006915	apoptotic process	20	915	0.5	0.00013	9606.ENSP00000167588,9606.ENSP00000200453,9606.ENSP00000216037,9606.ENSP00000234420,9606.ENSP00000259874,9606.ENSP00000263339,9606.ENSP00000272233,9606.ENSP00000273153,9606.ENSP00000273668,9606.ENSP00000307305,9606.ENSP00000326737,9606.ENSP00000351209,9606.ENSP00000356832,9606.ENSP00000358022,9606.ENSP00000360025,9606.ENSP00000360266,9606.ENSP00000362179,9606.ENSP00000398736,9606.ENSP00000448665,…	KRT20,PPP1R15A,XBP1,MSH6,IER3,IL1A,RHOB,CSRNP1,EAF2,DDIT4,TNFRSF12A,EPHA2,SGK1,MCL1,GADD45A,JUN,ZC3H12A,CYR61,DDIT3,TNFAIP3
GO:0009888	tissue development	28	1626	0.4	0.00013	9606.ENSP00000167588,9606.ENSP00000216037,9606.ENSP00000230990,9606.ENSP00000239223,9606.ENSP00000240100,9606.ENSP00000242480,9606.ENSP00000244869,9606.ENSP00000265138,9606.ENSP00000270162,9606.ENSP00000272233,9606.ENSP00000307235,9606.ENSP00000337862,9606.ENSP00000344352,9606.ENSP00000345393,9606.ENSP00000351209,9606.ENSP00000356438,9606.ENSP00000356954,9606.ENSP00000357842,9606.ENSP00000358596,…	KRT20,XBP1,HBEGF,DUSP1,DUSP4,EGR2,EREG,ARRDC3,SIK1,RHOB,EIF2AK3,OVOL1,ATF3,MAFF,EPHA2,PTGS2,CTGF,TUFT1,DUSP5,JUN,ANKRD1,SLC25A25,ERRFI1,GPCPD1,EDN1,CYR61,TIPARP,NR4A3
GO:1902624	positive regulation of neutrophil migration	5	34	1.33	0.00014	9606.ENSP00000263339,9606.ENSP00000296026,9606.ENSP00000306512,9606.ENSP00000368683,9606.ENSP00000427279	IL1A,CXCL3,CXCL8,EDN1,CXCL2
GO:0048856	anatomical structure development	59	5085	0.23	0.00015	9606.ENSP00000167588,9606.ENSP00000216037,9606.ENSP00000230990,9606.ENSP00000234420,9606.ENSP00000239223,9606.ENSP00000240100,9606.ENSP00000242480,9606.ENSP00000244869,9606.ENSP00000249356,9606.ENSP00000252809,9606.ENSP00000259874,9606.ENSP00000261845,9606.ENSP00000263339,9606.ENSP00000264444,9606.ENSP00000265138,9606.ENSP00000270162,9606.ENSP00000272233,9606.ENSP00000273153,9606.ENSP00000274289,…	KRT20,XBP1,HBEGF,MSH6,DUSP1,DUSP4,EGR2,EREG,DNAJB9,GDF15,IER3,MAPK6,IL1A,MXD1,ARRDC3,SIK1,RHOB,CSRNP1,PLK2,DUSP6,SEC24D,CXCL8,EIF2AK3,DDIT4,FOSL1,TNFRSF12A,OVOL1,ATF3,INSIG1,SPRY4,MAFF,EPHA2,OSGIN1,DUSP10,PTGS2,SGK1,CTGF,TUFT1,MCL1,DUSP5,PTBP2,JUN,PARD6B,ANKRD1,SLC25A25,ZC3H12A,ERRFI1,GPCPD1,EDN1,XDH,ZMYM5,CYR61,KLF6,TIPARP,PGM3,MANF,DDIT3,TNFAIP3,NR4A3
GO:0007275	multicellular organism development	56	4726	0.23	0.00016	9606.ENSP00000167588,9606.ENSP00000216037,9606.ENSP00000230990,9606.ENSP00000234420,9606.ENSP00000239223,9606.ENSP00000240100,9606.ENSP00000242480,9606.ENSP00000244869,9606.ENSP00000249356,9606.ENSP00000261845,9606.ENSP00000264444,9606.ENSP00000265138,9606.ENSP00000270162,9606.ENSP00000272233,9606.ENSP00000273153,9606.ENSP00000274289,9606.ENSP00000279488,9606.ENSP00000280551,9606.ENSP00000306512,…	KRT20,XBP1,HBEGF,MSH6,DUSP1,DUSP4,EGR2,EREG,DNAJB9,MAPK6,MXD1,ARRDC3,SIK1,RHOB,CSRNP1,PLK2,DUSP6,SEC24D,CXCL8,EIF2AK3,DDIT4,FOSL1,TNFRSF12A,OVOL1,ATF3,INSIG1,SPRY4,MAFF,EPHA2,OSGIN1,DUSP10,PTGS2,SGK1,CTGF,TUFT1,MCL1,DUSP5,PTBP2,JUN,PARD6B,ANKRD1,SLC25A25,ZC3H12A,ERRFI1,GPCPD1,EDN1,XDH,ZMYM5,CYR61,KLF6,TIPARP,PGM3,MANF,DDIT3,TNFAIP3,NR4A3
GO:0023052	signaling	59	5108	0.22	0.00017	9606.ENSP00000200453,9606.ENSP00000216037,9606.ENSP00000222803,9606.ENSP00000227752,9606.ENSP00000228437,9606.ENSP00000230990,9606.ENSP00000234420,9606.ENSP00000239223,9606.ENSP00000244869,9606.ENSP00000249356,9606.ENSP00000252809,9606.ENSP00000253063,9606.ENSP00000256458,9606.ENSP00000261845,9606.ENSP00000263056,9606.ENSP00000263339,9606.ENSP00000270162,9606.ENSP00000272233,9606.ENSP00000273153,…	PPP1R15A,XBP1,FKBP14,IL10RA,PRDM4,HBEGF,MSH6,DUSP1,EREG,DNAJB9,GDF15,SESN2,IRAK2,MAPK6,MAP3K8,IL1A,SIK1,RHOB,CSRNP1,PLK2,DUSP6,CXCL3,CXCL8,EIF2AK3,DDIT4,NFKBIB,TNFRSF12A,YOD1,ATF3,PEAR1,INSIG1,RASSF1,EPHA2,PTGS2,RGS16,SGK1,CTGF,MCL1,DUSP5,GADD45A,JUN,ZC3H12A,TSPYL2,RND3,EDN1,HRH1,VIMP,CYR61,ESRP1,HERPUD1,TIPARP,AMOTL2,CXCL2,UBC,DDIT3,DNAJC3,TNFAIP3,NR4A3,MAP3K14
GO:0045944	positive regulation of transcription by RNA polymerase II	22	1104	0.46	0.00017	9606.ENSP00000216037,9606.ENSP00000228437,9606.ENSP00000242480,9606.ENSP00000245919,9606.ENSP00000253063,9606.ENSP00000263339,9606.ENSP00000273153,9606.ENSP00000273668,9606.ENSP00000310170,9606.ENSP00000338807,9606.ENSP00000344352,9606.ENSP00000344741,9606.ENSP00000345393,9606.ENSP00000350633,9606.ENSP00000360266,9606.ENSP00000362179,9606.ENSP00000368683,9606.ENSP00000398736,9606.ENSP00000419923,…	XBP1,PRDM4,EGR2,FOSB,SESN2,IL1A,CSRNP1,EAF2,FOSL1,ZBTB49,ATF3,INSIG1,MAFF,SERTAD1,JUN,ZC3H12A,EDN1,CYR61,KLF6,UBC,DDIT3,NR4A3
GO:0034097	response to cytokine	21	1035	0.47	0.00021	9606.ENSP00000216037,9606.ENSP00000227752,9606.ENSP00000244869,9606.ENSP00000256458,9606.ENSP00000263056,9606.ENSP00000263339,9606.ENSP00000296026,9606.ENSP00000306512,9606.ENSP00000310170,9606.ENSP00000326737,9606.ENSP00000331748,9606.ENSP00000356438,9606.ENSP00000358022,9606.ENSP00000360266,9606.ENSP00000360762,9606.ENSP00000362179,9606.ENSP00000368683,9606.ENSP00000369820,9606.ENSP00000427279,…	XBP1,IL10RA,EREG,IRAK2,MAP3K8,IL1A,CXCL3,CXCL8,FOSL1,TNFRSF12A,RAB12,PTGS2,MCL1,JUN,ANKRD1,ZC3H12A,EDN1,PIGA,CXCL2,UBC,MAP3K14
GO:0044238	primary metabolic process	86	8808	0.15	0.00021	9606.ENSP00000075120,9606.ENSP00000200453,9606.ENSP00000216037,9606.ENSP00000222803,9606.ENSP00000228437,9606.ENSP00000230990,9606.ENSP00000234420,9606.ENSP00000239223,9606.ENSP00000240100,9606.ENSP00000242480,9606.ENSP00000244869,9606.ENSP00000245919,9606.ENSP00000249356,9606.ENSP00000253063,9606.ENSP00000256458,9606.ENSP00000256495,9606.ENSP00000261845,9606.ENSP00000263056,9606.ENSP00000264444,…	SLC2A3,PPP1R15A,XBP1,FKBP14,PRDM4,HBEGF,MSH6,DUSP1,DUSP4,EGR2,EREG,FOSB,DNAJB9,SESN2,IRAK2,BHLHE40,MAPK6,MAP3K8,MXD1,SIK1,CSRNP1,EAF2,PLK2,NRBF2,ZC3H12C,DUSP6,EIF2AK3,FOSL1,FUT1,NFKBIB,SERTAD3,YOD1,RAB12,OVOL1,ZBTB49,ATF3,INSIG1,MAFF,CREB5,SERTAD1,EPHA2,ZNF460,DUSP10,PTGS2,SGK1,UAP1,CTGF,DUSP5,PTBP2,GADD45A,JUN,LONRF3,YRDC,SLC25A25,ZC3H12A,ZBTB43,TSPYL2,ZNF165,GPCPD1,EDN1,XDH,PIGA,ZMYM5,TDG,VCPKM…
GO:0045935	positive regulation of nucleobase-containing compound metabolic process	29	1770	0.38	0.00021	9606.ENSP00000216037,9606.ENSP00000228437,9606.ENSP00000234420,9606.ENSP00000242480,9606.ENSP00000244869,9606.ENSP00000245919,9606.ENSP00000253063,9606.ENSP00000263339,9606.ENSP00000273153,9606.ENSP00000273668,9606.ENSP00000307235,9606.ENSP00000310170,9606.ENSP00000312988,9606.ENSP00000325414,9606.ENSP00000338807,9606.ENSP00000344352,9606.ENSP00000344741,9606.ENSP00000345393,9606.ENSP00000350359,…	XBP1,PRDM4,MSH6,EGR2,EREG,FOSB,SESN2,IL1A,CSRNP1,EAF2,EIF2AK3,FOSL1,NFKBIB,SERTAD3,ZBTB49,ATF3,INSIG1,MAFF,CREB5,SERTAD1,JUN,ANKRD1,ZC3H12A,EDN1,CYR61,KLF6,UBC,DDIT3,NR4A3
GO:0043618	regulation of transcription from RNA polymerase II promoter in response to stress	6	67	1.11	0.00022	9606.ENSP00000216037,9606.ENSP00000253063,9606.ENSP00000344352,9606.ENSP00000360266,9606.ENSP00000441543,9606.ENSP00000448665	XBP1,SESN2,ATF3,JUN,UBC,DDIT3
GO:0071222	cellular response to lipopolysaccharide	8	146	0.9	0.00022	9606.ENSP00000216037,9606.ENSP00000256458,9606.ENSP00000306512,9606.ENSP00000312988,9606.ENSP00000360762,9606.ENSP00000362179,9606.ENSP00000381282,9606.ENSP00000481570	XBP1,IRAK2,CXCL8,NFKBIB,ANKRD1,ZC3H12A,VIMP,TNFAIP3
GO:0010243	response to organonitrogen compound	19	876	0.5	0.00023	9606.ENSP00000216037,9606.ENSP00000239223,9606.ENSP00000242480,9606.ENSP00000244869,9606.ENSP00000245919,9606.ENSP00000249356,9606.ENSP00000253063,9606.ENSP00000310170,9606.ENSP00000326813,9606.ENSP00000356438,9606.ENSP00000356954,9606.ENSP00000360266,9606.ENSP00000366702,9606.ENSP00000368683,9606.ENSP00000380247,9606.ENSP00000381282,9606.ENSP00000409555,9606.ENSP00000481570,9606.ENSP00000482027	XBP1,DUSP1,EGR2,EREG,FOSB,DNAJB9,SESN2,FOSL1,YOD1,PTGS2,CTGF,JUN,ERRFI1,EDN1,HRH1,VIMP,HERPUD1,TNFAIP3,NR4A3
GO:1901342	regulation of vasculature development	11	305	0.72	0.00023	9606.ENSP00000216037,9606.ENSP00000263339,9606.ENSP00000272233,9606.ENSP00000274289,9606.ENSP00000306512,9606.ENSP00000326737,9606.ENSP00000351209,9606.ENSP00000356438,9606.ENSP00000362179,9606.ENSP00000368727,9606.ENSP00000481570	XBP1,IL1A,RHOB,PLK2,CXCL8,TNFRSF12A,EPHA2,PTGS2,ZC3H12A,XDH,TNFAIP3
GO:0071704	organic substance metabolic process	88	9135	0.14	0.00024	9606.ENSP00000075120,9606.ENSP00000200453,9606.ENSP00000216037,9606.ENSP00000222803,9606.ENSP00000228437,9606.ENSP00000230990,9606.ENSP00000234420,9606.ENSP00000239223,9606.ENSP00000240100,9606.ENSP00000242480,9606.ENSP00000244869,9606.ENSP00000245919,9606.ENSP00000249356,9606.ENSP00000253063,9606.ENSP00000256458,9606.ENSP00000256495,9606.ENSP00000261845,9606.ENSP00000263056,9606.ENSP00000263960,…	SLC2A3,PPP1R15A,XBP1,FKBP14,PRDM4,HBEGF,MSH6,DUSP1,DUSP4,EGR2,EREG,FOSB,DNAJB9,SESN2,IRAK2,BHLHE40,MAPK6,MAP3K8,COQ10B,MXD1,SIK1,CSRNP1,EAF2,PLK2,NRBF2,ZC3H12C,DUSP6,CXCL8,EIF2AK3,FOSL1,FUT1,NFKBIB,SERTAD3,YOD1,RAB12,OVOL1,ZBTB49,ATF3,INSIG1,MAFF,CREB5,SERTAD1,EPHA2,ZNF460,DUSP10,PTGS2,SGK1,UAP1,CTGF,DUSP5,PTBP2,GADD45A,JUN,LONRF3,YRDC,SLC25A25,ZC3H12A,ZBTB43,TSPYL2,ZNF165,GPCPD1,EDN1,XDH,PIGA,ZM…
GO:0045937	positive regulation of phosphate metabolic process	21	1052	0.46	0.00025	9606.ENSP00000200453,9606.ENSP00000216037,9606.ENSP00000230990,9606.ENSP00000244869,9606.ENSP00000252809,9606.ENSP00000256458,9606.ENSP00000263056,9606.ENSP00000264711,9606.ENSP00000279488,9606.ENSP00000356438,9606.ENSP00000356954,9606.ENSP00000358596,9606.ENSP00000360025,9606.ENSP00000360266,9606.ENSP00000362179,9606.ENSP00000368683,9606.ENSP00000368727,9606.ENSP00000380247,9606.ENSP00000398736,…	PPP1R15A,XBP1,HBEGF,EREG,GDF15,IRAK2,MAP3K8,DNAJC27,DUSP6,PTGS2,CTGF,DUSP5,GADD45A,JUN,ZC3H12A,EDN1,XDH,HRH1,CYR61,UBC,MAP3K14
GO:0006979	response to oxidative stress	12	373	0.67	0.00026	9606.ENSP00000216037,9606.ENSP00000239223,9606.ENSP00000253063,9606.ENSP00000272233,9606.ENSP00000310170,9606.ENSP00000356438,9606.ENSP00000360266,9606.ENSP00000362179,9606.ENSP00000368683,9606.ENSP00000381282,9606.ENSP00000481570,9606.ENSP00000482027	XBP1,DUSP1,SESN2,RHOB,FOSL1,PTGS2,JUN,ZC3H12A,EDN1,VIMP,TNFAIP3,NR4A3
GO:0043555	regulation of translation in response to stress	4	18	1.51	0.00026	9606.ENSP00000200453,9606.ENSP00000253063,9606.ENSP00000307235,9606.ENSP00000473631	PPP1R15A,SESN2,EIF2AK3,DNAJC3
GO:0006357	regulation of transcription by RNA polymerase II	37	2633	0.31	0.00028	9606.ENSP00000216037,9606.ENSP00000228437,9606.ENSP00000242480,9606.ENSP00000245919,9606.ENSP00000252809,9606.ENSP00000253063,9606.ENSP00000256495,9606.ENSP00000263339,9606.ENSP00000264444,9606.ENSP00000273153,9606.ENSP00000273668,9606.ENSP00000310170,9606.ENSP00000330074,9606.ENSP00000337862,9606.ENSP00000338807,9606.ENSP00000344352,9606.ENSP00000344741,9606.ENSP00000345393,9606.ENSP00000350359,…	XBP1,PRDM4,EGR2,FOSB,GDF15,SESN2,BHLHE40,IL1A,MXD1,CSRNP1,EAF2,FOSL1,HIST1H1B,OVOL1,ZBTB49,ATF3,INSIG1,MAFF,CREB5,SERTAD1,ZNF460,TSC22D2,JUN,ANKRD1,TSC22D3,ZC3H12A,ZBTB43,ZNF165,EDN1,ZMYM5,TDG,CYR61,KLF6,UBC,DDIT3,ZNF699,NR4A3
GO:0010558	negative regulation of macromolecule biosynthetic process	25	1425	0.41	0.00028	9606.ENSP00000216037,9606.ENSP00000230990,9606.ENSP00000239223,9606.ENSP00000244869,9606.ENSP00000245919,9606.ENSP00000253063,9606.ENSP00000256495,9606.ENSP00000264444,9606.ENSP00000307235,9606.ENSP00000330074,9606.ENSP00000337862,9606.ENSP00000344352,9606.ENSP00000352119,9606.ENSP00000360266,9606.ENSP00000360762,9606.ENSP00000361458,9606.ENSP00000362179,9606.ENSP00000364591,9606.ENSP00000366702,…	XBP1,HBEGF,DUSP1,EREG,FOSB,SESN2,BHLHE40,MXD1,EIF2AK3,HIST1H1B,OVOL1,ATF3,HIST1H2AG,JUN,ANKRD1,TSC22D3,ZC3H12A,TSPYL2,ERRFI1,EDN1,TDG,VIMP,UBC,DDIT3,NR4A3
GO:0043410	positive regulation of MAPK cascade	14	512	0.6	0.00028	9606.ENSP00000252809,9606.ENSP00000256458,9606.ENSP00000263056,9606.ENSP00000264711,9606.ENSP00000279488,9606.ENSP00000356954,9606.ENSP00000358596,9606.ENSP00000360025,9606.ENSP00000360266,9606.ENSP00000362179,9606.ENSP00000368683,9606.ENSP00000368727,9606.ENSP00000441543,9606.ENSP00000482657	GDF15,IRAK2,MAP3K8,DNAJC27,DUSP6,CTGF,DUSP5,GADD45A,JUN,ZC3H12A,EDN1,XDH,UBC,MAP3K14
GO:0031960	response to corticosteroid	8	154	0.88	0.00029	9606.ENSP00000239223,9606.ENSP00000245919,9606.ENSP00000307305,9606.ENSP00000310170,9606.ENSP00000356438,9606.ENSP00000356954,9606.ENSP00000366702,9606.ENSP00000368683	DUSP1,FOSB,DDIT4,FOSL1,PTGS2,CTGF,ERRFI1,EDN1
GO:0045786	negative regulation of cell cycle	14	517	0.59	0.00031	9606.ENSP00000200453,9606.ENSP00000239223,9606.ENSP00000272233,9606.ENSP00000274289,9606.ENSP00000306512,9606.ENSP00000337862,9606.ENSP00000338807,9606.ENSP00000349547,9606.ENSP00000356438,9606.ENSP00000360025,9606.ENSP00000364591,9606.ENSP00000403683,9606.ENSP00000448665,9606.ENSP00000481570	PPP1R15A,DUSP1,RHOB,PLK2,CXCL8,OVOL1,ZBTB49,RASSF1,PTGS2,GADD45A,TSPYL2,NABP1,DDIT3,TNFAIP3
GO:0045893	positive regulation of transcription, DNA-templated	25	1435	0.4	0.00031	9606.ENSP00000216037,9606.ENSP00000228437,9606.ENSP00000242480,9606.ENSP00000245919,9606.ENSP00000253063,9606.ENSP00000263339,9606.ENSP00000273153,9606.ENSP00000273668,9606.ENSP00000307235,9606.ENSP00000310170,9606.ENSP00000325414,9606.ENSP00000338807,9606.ENSP00000344352,9606.ENSP00000344741,9606.ENSP00000345393,9606.ENSP00000350359,9606.ENSP00000350633,9606.ENSP00000360266,9606.ENSP00000362179,…	XBP1,PRDM4,EGR2,FOSB,SESN2,IL1A,CSRNP1,EAF2,EIF2AK3,FOSL1,SERTAD3,ZBTB49,ATF3,INSIG1,MAFF,CREB5,SERTAD1,JUN,ZC3H12A,EDN1,CYR61,KLF6,UBC,DDIT3,NR4A3
GO:0006807	nitrogen compound metabolic process	82	8349	0.15	0.00033	9606.ENSP00000200453,9606.ENSP00000216037,9606.ENSP00000222803,9606.ENSP00000228437,9606.ENSP00000230990,9606.ENSP00000234420,9606.ENSP00000239223,9606.ENSP00000240100,9606.ENSP00000242480,9606.ENSP00000244869,9606.ENSP00000245919,9606.ENSP00000249356,9606.ENSP00000253063,9606.ENSP00000256458,9606.ENSP00000256495,9606.ENSP00000261845,9606.ENSP00000263056,9606.ENSP00000264444,9606.ENSP00000270162,…	PPP1R15A,XBP1,FKBP14,PRDM4,HBEGF,MSH6,DUSP1,DUSP4,EGR2,EREG,FOSB,DNAJB9,SESN2,IRAK2,BHLHE40,MAPK6,MAP3K8,MXD1,SIK1,CSRNP1,EAF2,PLK2,NRBF2,ZC3H12C,DUSP6,EIF2AK3,FOSL1,FUT1,NFKBIB,SERTAD3,YOD1,RAB12,OVOL1,ZBTB49,ATF3,MAFF,CREB5,SERTAD1,EPHA2,ZNF460,DUSP10,PTGS2,SGK1,UAP1,CTGF,DUSP5,PTBP2,GADD45A,JUN,LONRF3,YRDC,SLC25A25,ZC3H12A,ZBTB43,TSPYL2,ZNF165,XDH,PIGA,ZMYM5,TDG,VCPKMT,PDP1,VIMP,ZNF527,CYR61,N…
GO:0010647	positive regulation of cell communication	27	1631	0.38	0.00033	9606.ENSP00000216037,9606.ENSP00000230990,9606.ENSP00000244869,9606.ENSP00000252809,9606.ENSP00000256458,9606.ENSP00000263056,9606.ENSP00000264711,9606.ENSP00000274289,9606.ENSP00000279488,9606.ENSP00000321026,9606.ENSP00000326737,9606.ENSP00000344352,9606.ENSP00000356438,9606.ENSP00000356954,9606.ENSP00000358022,9606.ENSP00000358596,9606.ENSP00000360025,9606.ENSP00000360266,9606.ENSP00000360762,…	XBP1,HBEGF,EREG,GDF15,IRAK2,MAP3K8,DNAJC27,PLK2,DUSP6,LURAP1L,TNFRSF12A,ATF3,PTGS2,CTGF,MCL1,DUSP5,GADD45A,JUN,ANKRD1,ZC3H12A,EDN1,XDH,CYR61,CDKN2AIP,UBC,DDIT3,MAP3K14
GO:2000113	negative regulation of cellular macromolecule biosynthetic process	24	1348	0.41	0.00033	9606.ENSP00000216037,9606.ENSP00000230990,9606.ENSP00000239223,9606.ENSP00000244869,9606.ENSP00000245919,9606.ENSP00000253063,9606.ENSP00000256495,9606.ENSP00000264444,9606.ENSP00000307235,9606.ENSP00000330074,9606.ENSP00000337862,9606.ENSP00000344352,9606.ENSP00000352119,9606.ENSP00000360266,9606.ENSP00000360762,9606.ENSP00000361458,9606.ENSP00000362179,9606.ENSP00000364591,9606.ENSP00000368683,…	XBP1,HBEGF,DUSP1,EREG,FOSB,SESN2,BHLHE40,MXD1,EIF2AK3,HIST1H1B,OVOL1,ATF3,HIST1H2AG,JUN,ANKRD1,TSC22D3,ZC3H12A,TSPYL2,EDN1,TDG,VIMP,UBC,DDIT3,NR4A3
GO:0010632	regulation of epithelial cell migration	9	209	0.8	0.00034	9606.ENSP00000230990,9606.ENSP00000272233,9606.ENSP00000274289,9606.ENSP00000351209,9606.ENSP00000355866,9606.ENSP00000356438,9606.ENSP00000360266,9606.ENSP00000362179,9606.ENSP00000368683	HBEGF,RHOB,PLK2,EPHA2,DUSP10,PTGS2,JUN,ZC3H12A,EDN1
GO:0023056	positive regulation of signaling	27	1638	0.38	0.00035	9606.ENSP00000216037,9606.ENSP00000230990,9606.ENSP00000244869,9606.ENSP00000252809,9606.ENSP00000256458,9606.ENSP00000263056,9606.ENSP00000264711,9606.ENSP00000274289,9606.ENSP00000279488,9606.ENSP00000321026,9606.ENSP00000326737,9606.ENSP00000344352,9606.ENSP00000356438,9606.ENSP00000356954,9606.ENSP00000358022,9606.ENSP00000358596,9606.ENSP00000360025,9606.ENSP00000360266,9606.ENSP00000360762,…	XBP1,HBEGF,EREG,GDF15,IRAK2,MAP3K8,DNAJC27,PLK2,DUSP6,LURAP1L,TNFRSF12A,ATF3,PTGS2,CTGF,MCL1,DUSP5,GADD45A,JUN,ANKRD1,ZC3H12A,EDN1,XDH,CYR61,CDKN2AIP,UBC,DDIT3,MAP3K14
GO:0036490	regulation of translation in response to endoplasmic reticulum stress	3	6	1.86	0.00044	9606.ENSP00000253063,9606.ENSP00000307235,9606.ENSP00000473631	SESN2,EIF2AK3,DNAJC3
GO:0035239	tube morphogenesis	15	615	0.55	0.00048	9606.ENSP00000216037,9606.ENSP00000244869,9606.ENSP00000272233,9606.ENSP00000306512,9606.ENSP00000307235,9606.ENSP00000326737,9606.ENSP00000351209,9606.ENSP00000356438,9606.ENSP00000356954,9606.ENSP00000360266,9606.ENSP00000362179,9606.ENSP00000368683,9606.ENSP00000398736,9606.ENSP00000420612,9606.ENSP00000482027	XBP1,EREG,RHOB,CXCL8,EIF2AK3,TNFRSF12A,EPHA2,PTGS2,CTGF,JUN,ZC3H12A,EDN1,CYR61,TIPARP,NR4A3
GO:0045765	regulation of angiogenesis	10	277	0.72	0.00049	9606.ENSP00000216037,9606.ENSP00000263339,9606.ENSP00000272233,9606.ENSP00000274289,9606.ENSP00000306512,9606.ENSP00000326737,9606.ENSP00000351209,9606.ENSP00000356438,9606.ENSP00000362179,9606.ENSP00000481570	XBP1,IL1A,RHOB,PLK2,CXCL8,TNFRSF12A,EPHA2,PTGS2,ZC3H12A,TNFAIP3
GO:0001934	positive regulation of protein phosphorylation	19	941	0.47	0.0005	9606.ENSP00000216037,9606.ENSP00000230990,9606.ENSP00000244869,9606.ENSP00000252809,9606.ENSP00000256458,9606.ENSP00000263056,9606.ENSP00000264711,9606.ENSP00000279488,9606.ENSP00000356438,9606.ENSP00000356954,9606.ENSP00000358596,9606.ENSP00000360025,9606.ENSP00000360266,9606.ENSP00000362179,9606.ENSP00000368683,9606.ENSP00000368727,9606.ENSP00000398736,9606.ENSP00000441543,9606.ENSP00000482657	XBP1,HBEGF,EREG,GDF15,IRAK2,MAP3K8,DNAJC27,DUSP6,PTGS2,CTGF,DUSP5,GADD45A,JUN,ZC3H12A,EDN1,XDH,CYR61,UBC,MAP3K14
GO:0009607	response to biotic stimulus	22	1206	0.42	0.00051	9606.ENSP00000216037,9606.ENSP00000227752,9606.ENSP00000256458,9606.ENSP00000296026,9606.ENSP00000306512,9606.ENSP00000307235,9606.ENSP00000307305,9606.ENSP00000310170,9606.ENSP00000312988,9606.ENSP00000331748,9606.ENSP00000355866,9606.ENSP00000356438,9606.ENSP00000360266,9606.ENSP00000360762,9606.ENSP00000362179,9606.ENSP00000368683,9606.ENSP00000381282,9606.ENSP00000427279,9606.ENSP00000448665,…	XBP1,IL10RA,IRAK2,CXCL3,CXCL8,EIF2AK3,DDIT4,FOSL1,NFKBIB,RAB12,DUSP10,PTGS2,JUN,ANKRD1,ZC3H12A,EDN1,VIMP,CXCL2,DDIT3,DNAJC3,TNFAIP3,MAP3K14
GO:0043066	negative regulation of apoptotic process	18	859	0.48	0.00051	9606.ENSP00000216037,9606.ENSP00000239223,9606.ENSP00000259874,9606.ENSP00000263339,9606.ENSP00000274289,9606.ENSP00000356438,9606.ENSP00000358022,9606.ENSP00000360266,9606.ENSP00000361458,9606.ENSP00000362179,9606.ENSP00000368683,9606.ENSP00000381282,9606.ENSP00000398736,9606.ENSP00000409555,9606.ENSP00000441543,9606.ENSP00000473631,9606.ENSP00000481570,9606.ENSP00000482027	XBP1,DUSP1,IER3,IL1A,PLK2,PTGS2,MCL1,JUN,TSC22D3,ZC3H12A,EDN1,VIMP,CYR61,HERPUD1,UBC,DNAJC3,TNFAIP3,NR4A3
GO:0044092	negative regulation of molecular function	21	1119	0.43	0.00053	9606.ENSP00000200453,9606.ENSP00000239223,9606.ENSP00000240100,9606.ENSP00000256458,9606.ENSP00000256495,9606.ENSP00000270162,9606.ENSP00000279488,9606.ENSP00000355866,9606.ENSP00000356438,9606.ENSP00000358596,9606.ENSP00000360025,9606.ENSP00000360266,9606.ENSP00000362179,9606.ENSP00000366702,9606.ENSP00000376611,9606.ENSP00000379201,9606.ENSP00000409555,9606.ENSP00000446479,9606.ENSP00000448665,…	PPP1R15A,DUSP1,DUSP4,IRAK2,BHLHE40,SIK1,DUSP6,DUSP10,PTGS2,DUSP5,GADD45A,JUN,ZC3H12A,ERRFI1,TDG,VCPKMT,HERPUD1,FICD,DDIT3,DNAJC3,TNFAIP3
GO:0009967	positive regulation of signal transduction	25	1493	0.39	0.00055	9606.ENSP00000216037,9606.ENSP00000230990,9606.ENSP00000244869,9606.ENSP00000252809,9606.ENSP00000256458,9606.ENSP00000263056,9606.ENSP00000264711,9606.ENSP00000279488,9606.ENSP00000321026,9606.ENSP00000326737,9606.ENSP00000344352,9606.ENSP00000356954,9606.ENSP00000358022,9606.ENSP00000358596,9606.ENSP00000360025,9606.ENSP00000360266,9606.ENSP00000360762,9606.ENSP00000362179,9606.ENSP00000368683,…	XBP1,HBEGF,EREG,GDF15,IRAK2,MAP3K8,DNAJC27,DUSP6,LURAP1L,TNFRSF12A,ATF3,CTGF,MCL1,DUSP5,GADD45A,JUN,ANKRD1,ZC3H12A,EDN1,XDH,CYR61,CDKN2AIP,UBC,DDIT3,MAP3K14
GO:0006366	transcription by RNA polymerase II	17	784	0.5	0.00056	9606.ENSP00000216037,9606.ENSP00000228437,9606.ENSP00000242480,9606.ENSP00000245919,9606.ENSP00000273153,9606.ENSP00000273668,9606.ENSP00000277746,9606.ENSP00000310170,9606.ENSP00000344352,9606.ENSP00000345393,9606.ENSP00000350359,9606.ENSP00000356954,9606.ENSP00000360266,9606.ENSP00000403683,9606.ENSP00000419923,9606.ENSP00000448665,9606.ENSP00000482027	XBP1,PRDM4,EGR2,FOSB,CSRNP1,EAF2,NRBF2,FOSL1,ATF3,MAFF,CREB5,CTGF,JUN,NABP1,KLF6,DDIT3,NR4A3
GO:0042127	regulation of cell population proliferation	26	1594	0.37	0.00058	9606.ENSP00000216037,9606.ENSP00000230990,9606.ENSP00000239223,9606.ENSP00000244869,9606.ENSP00000263339,9606.ENSP00000273668,9606.ENSP00000296026,9606.ENSP00000306512,9606.ENSP00000310170,9606.ENSP00000337862,9606.ENSP00000338807,9606.ENSP00000344352,9606.ENSP00000350633,9606.ENSP00000355866,9606.ENSP00000356438,9606.ENSP00000356832,9606.ENSP00000356954,9606.ENSP00000359216,9606.ENSP00000360266,…	XBP1,HBEGF,DUSP1,EREG,IL1A,EAF2,CXCL3,CXCL8,FOSL1,OVOL1,ZBTB49,ATF3,SERTAD1,DUSP10,PTGS2,SGK1,CTGF,PTBP2,JUN,ERRFI1,EDN1,XDH,CYR61,CXCL2,TNFAIP3,NR4A3
GO:0060548	negative regulation of cell death	19	953	0.46	0.00058	9606.ENSP00000216037,9606.ENSP00000239223,9606.ENSP00000259874,9606.ENSP00000263339,9606.ENSP00000274289,9606.ENSP00000356438,9606.ENSP00000356954,9606.ENSP00000358022,9606.ENSP00000360266,9606.ENSP00000361458,9606.ENSP00000362179,9606.ENSP00000368683,9606.ENSP00000381282,9606.ENSP00000398736,9606.ENSP00000409555,9606.ENSP00000441543,9606.ENSP00000473631,9606.ENSP00000481570,9606.ENSP00000482027	XBP1,DUSP1,IER3,IL1A,PLK2,PTGS2,CTGF,MCL1,JUN,TSC22D3,ZC3H12A,EDN1,VIMP,CYR61,HERPUD1,UBC,DNAJC3,TNFAIP3,NR4A3
GO:0071345	cellular response to cytokine stimulus	19	953	0.46	0.00058	9606.ENSP00000216037,9606.ENSP00000227752,9606.ENSP00000244869,9606.ENSP00000256458,9606.ENSP00000263056,9606.ENSP00000263339,9606.ENSP00000296026,9606.ENSP00000306512,9606.ENSP00000326737,9606.ENSP00000331748,9606.ENSP00000356438,9606.ENSP00000358022,9606.ENSP00000360762,9606.ENSP00000362179,9606.ENSP00000368683,9606.ENSP00000369820,9606.ENSP00000427279,9606.ENSP00000441543,9606.ENSP00000482657	XBP1,IL10RA,EREG,IRAK2,MAP3K8,IL1A,CXCL3,CXCL8,TNFRSF12A,RAB12,PTGS2,MCL1,ANKRD1,ZC3H12A,EDN1,PIGA,CXCL2,UBC,MAP3K14
GO:0042594	response to starvation	8	175	0.82	0.00061	9606.ENSP00000167588,9606.ENSP00000216037,9606.ENSP00000253063,9606.ENSP00000307235,9606.ENSP00000344352,9606.ENSP00000360266,9606.ENSP00000362179,9606.ENSP00000448665	KRT20,XBP1,SESN2,EIF2AK3,ATF3,JUN,ZC3H12A,DDIT3
GO:0071396	cellular response to lipid	13	486	0.59	0.00062	9606.ENSP00000216037,9606.ENSP00000256458,9606.ENSP00000306512,9606.ENSP00000307305,9606.ENSP00000312988,9606.ENSP00000344741,9606.ENSP00000360762,9606.ENSP00000362179,9606.ENSP00000366702,9606.ENSP00000368683,9606.ENSP00000381282,9606.ENSP00000481570,9606.ENSP00000482027	XBP1,IRAK2,CXCL8,DDIT4,NFKBIB,INSIG1,ANKRD1,ZC3H12A,ERRFI1,EDN1,VIMP,TNFAIP3,NR4A3
GO:0036498	IRE1-mediated unfolded protein response	5	52	1.14	0.00069	9606.ENSP00000216037,9606.ENSP00000222803,9606.ENSP00000249356,9606.ENSP00000364591,9606.ENSP00000473631	XBP1,FKBP14,DNAJB9,TSPYL2,DNAJC3
GO:0044093	positive regulation of molecular function	27	1713	0.36	0.00069	9606.ENSP00000200453,9606.ENSP00000234420,9606.ENSP00000244869,9606.ENSP00000252809,9606.ENSP00000256458,9606.ENSP00000263056,9606.ENSP00000265138,9606.ENSP00000274289,9606.ENSP00000279488,9606.ENSP00000307235,9606.ENSP00000310170,9606.ENSP00000351209,9606.ENSP00000356529,9606.ENSP00000356832,9606.ENSP00000356954,9606.ENSP00000358596,9606.ENSP00000360025,9606.ENSP00000360266,9606.ENSP00000366702,…	PPP1R15A,MSH6,EREG,GDF15,IRAK2,MAP3K8,ARRDC3,PLK2,DUSP6,EIF2AK3,FOSL1,EPHA2,RGS16,SGK1,CTGF,DUSP5,GADD45A,JUN,ERRFI1,EDN1,XDH,CYR61,HERPUD1,DCUN1D2,UBC,DDIT3,MAP3K14
GO:0031668	cellular response to extracellular stimulus	9	235	0.74	0.00073	9606.ENSP00000167588,9606.ENSP00000216037,9606.ENSP00000253063,9606.ENSP00000307235,9606.ENSP00000310170,9606.ENSP00000344352,9606.ENSP00000356438,9606.ENSP00000360266,9606.ENSP00000362179	KRT20,XBP1,SESN2,EIF2AK3,FOSL1,ATF3,PTGS2,JUN,ZC3H12A
GO:0097190	apoptotic signaling pathway	10	295	0.69	0.00075	9606.ENSP00000200453,9606.ENSP00000216037,9606.ENSP00000234420,9606.ENSP00000263339,9606.ENSP00000307305,9606.ENSP00000326737,9606.ENSP00000351209,9606.ENSP00000358022,9606.ENSP00000360266,9606.ENSP00000448665	PPP1R15A,XBP1,MSH6,IL1A,DDIT4,TNFRSF12A,EPHA2,MCL1,JUN,DDIT3
GO:0010628	positive regulation of gene expression	28	1826	0.35	0.00076	9606.ENSP00000200453,9606.ENSP00000216037,9606.ENSP00000228437,9606.ENSP00000242480,9606.ENSP00000245919,9606.ENSP00000253063,9606.ENSP00000263339,9606.ENSP00000273153,9606.ENSP00000273668,9606.ENSP00000307235,9606.ENSP00000310170,9606.ENSP00000325414,9606.ENSP00000338807,9606.ENSP00000344352,9606.ENSP00000344741,9606.ENSP00000345393,9606.ENSP00000350359,9606.ENSP00000350633,9606.ENSP00000356954,…	PPP1R15A,XBP1,PRDM4,EGR2,FOSB,SESN2,IL1A,CSRNP1,EAF2,EIF2AK3,FOSL1,SERTAD3,ZBTB49,ATF3,INSIG1,MAFF,CREB5,SERTAD1,CTGF,JUN,ZC3H12A,EDN1,CYR61,KLF6,UBC,DDIT3,DNAJC3,NR4A3
GO:0036003	positive regulation of transcription from RNA polymerase II promoter in response to stress	4	26	1.35	0.00076	9606.ENSP00000216037,9606.ENSP00000253063,9606.ENSP00000344352,9606.ENSP00000448665	XBP1,SESN2,ATF3,DDIT3
GO:0010634	positive regulation of epithelial cell migration	7	136	0.87	0.00086	9606.ENSP00000230990,9606.ENSP00000272233,9606.ENSP00000274289,9606.ENSP00000356438,9606.ENSP00000360266,9606.ENSP00000362179,9606.ENSP00000368683	HBEGF,RHOB,PLK2,PTGS2,JUN,ZC3H12A,EDN1
GO:1900101	regulation of endoplasmic reticulum unfolded protein response	4	27	1.33	0.00086	9606.ENSP00000200453,9606.ENSP00000216037,9606.ENSP00000249356,9606.ENSP00000446479	PPP1R15A,XBP1,DNAJB9,FICD
GO:0009267	cellular response to starvation	7	137	0.87	0.00089	9606.ENSP00000167588,9606.ENSP00000216037,9606.ENSP00000253063,9606.ENSP00000307235,9606.ENSP00000344352,9606.ENSP00000360266,9606.ENSP00000362179	KRT20,XBP1,SESN2,EIF2AK3,ATF3,JUN,ZC3H12A
GO:0070848	response to growth factor	13	507	0.57	0.00089	9606.ENSP00000216037,9606.ENSP00000252809,9606.ENSP00000279488,9606.ENSP00000306512,9606.ENSP00000307305,9606.ENSP00000351209,9606.ENSP00000356954,9606.ENSP00000360266,9606.ENSP00000360762,9606.ENSP00000366702,9606.ENSP00000368683,9606.ENSP00000405738,9606.ENSP00000441543	XBP1,GDF15,DUSP6,CXCL8,DDIT4,EPHA2,CTGF,JUN,ANKRD1,ERRFI1,EDN1,ESRP1,UBC
GO:0034654	nucleobase-containing compound biosynthetic process	39	3031	0.27	0.0009	9606.ENSP00000216037,9606.ENSP00000228437,9606.ENSP00000242480,9606.ENSP00000244869,9606.ENSP00000245919,9606.ENSP00000256495,9606.ENSP00000264444,9606.ENSP00000273153,9606.ENSP00000273668,9606.ENSP00000277746,9606.ENSP00000310170,9606.ENSP00000312988,9606.ENSP00000325414,9606.ENSP00000337862,9606.ENSP00000338807,9606.ENSP00000344352,9606.ENSP00000345393,9606.ENSP00000350359,9606.ENSP00000350633,…	XBP1,PRDM4,EGR2,EREG,FOSB,BHLHE40,MXD1,CSRNP1,EAF2,NRBF2,FOSL1,NFKBIB,SERTAD3,OVOL1,ZBTB49,ATF3,MAFF,CREB5,SERTAD1,ZNF460,PTGS2,UAP1,CTGF,JUN,ZC3H12A,ZBTB43,TSPYL2,ZNF165,XDH,ZMYM5,TDG,ZNF527,NABP1,KLF6,PGM3,UBC,DDIT3,ZNF699,NR4A3
GO:0051384	response to glucocorticoid	7	138	0.87	0.00092	9606.ENSP00000239223,9606.ENSP00000245919,9606.ENSP00000307305,9606.ENSP00000310170,9606.ENSP00000356438,9606.ENSP00000366702,9606.ENSP00000368683	DUSP1,FOSB,DDIT4,FOSL1,PTGS2,ERRFI1,EDN1
GO:0006974	cellular response to DNA damage stimulus	16	749	0.49	0.001	9606.ENSP00000200453,9606.ENSP00000234420,9606.ENSP00000253063,9606.ENSP00000274289,9606.ENSP00000307305,9606.ENSP00000349547,9606.ENSP00000351209,9606.ENSP00000356832,9606.ENSP00000358022,9606.ENSP00000360025,9606.ENSP00000362179,9606.ENSP00000376611,9606.ENSP00000403683,9606.ENSP00000427108,9606.ENSP00000441543,9606.ENSP00000448665	PPP1R15A,MSH6,SESN2,PLK2,DDIT4,RASSF1,EPHA2,SGK1,MCL1,GADD45A,ZC3H12A,TDG,NABP1,CDKN2AIP,UBC,DDIT3
GO:0051385	response to mineralocorticoid	4	29	1.3	0.0011	9606.ENSP00000245919,9606.ENSP00000310170,9606.ENSP00000356954,9606.ENSP00000368683	FOSB,FOSL1,CTGF,EDN1
GO:2000026	regulation of multicellular organismal development	28	1876	0.34	0.0011	9606.ENSP00000216037,9606.ENSP00000234420,9606.ENSP00000261845,9606.ENSP00000263339,9606.ENSP00000272233,9606.ENSP00000273668,9606.ENSP00000274289,9606.ENSP00000279488,9606.ENSP00000306512,9606.ENSP00000307235,9606.ENSP00000326737,9606.ENSP00000345393,9606.ENSP00000351209,9606.ENSP00000355866,9606.ENSP00000356438,9606.ENSP00000356954,9606.ENSP00000360266,9606.ENSP00000360762,9606.ENSP00000361458,…	XBP1,MSH6,MAPK6,IL1A,RHOB,EAF2,PLK2,DUSP6,CXCL8,EIF2AK3,TNFRSF12A,MAFF,EPHA2,DUSP10,PTGS2,CTGF,JUN,ANKRD1,TSC22D3,ZC3H12A,ERRFI1,EDN1,XDH,TDG,CYR61,DDIT3,TNFAIP3,NR4A3
GO:0006469	negative regulation of protein kinase activity	9	254	0.71	0.0012	9606.ENSP00000239223,9606.ENSP00000240100,9606.ENSP00000279488,9606.ENSP00000355866,9606.ENSP00000358596,9606.ENSP00000360025,9606.ENSP00000366702,9606.ENSP00000473631,9606.ENSP00000481570	DUSP1,DUSP4,DUSP6,DUSP10,DUSP5,GADD45A,ERRFI1,DNAJC3,TNFAIP3
GO:0043558	regulation of translational initiation in response to stress	3	10	1.64	0.0012	9606.ENSP00000200453,9606.ENSP00000307235,9606.ENSP00000473631	PPP1R15A,EIF2AK3,DNAJC3
GO:0090023	positive regulation of neutrophil chemotaxis	4	30	1.29	0.0012	9606.ENSP00000296026,9606.ENSP00000306512,9606.ENSP00000368683,9606.ENSP00000427279	CXCL3,CXCL8,EDN1,CXCL2
GO:0043412	macromolecule modification	40	3197	0.26	0.0013	9606.ENSP00000200453,9606.ENSP00000222803,9606.ENSP00000228437,9606.ENSP00000230990,9606.ENSP00000239223,9606.ENSP00000240100,9606.ENSP00000242480,9606.ENSP00000244869,9606.ENSP00000256458,9606.ENSP00000261845,9606.ENSP00000263056,9606.ENSP00000270162,9606.ENSP00000274289,9606.ENSP00000279488,9606.ENSP00000307235,9606.ENSP00000312021,9606.ENSP00000326813,9606.ENSP00000351209,9606.ENSP00000355866,…	PPP1R15A,FKBP14,PRDM4,HBEGF,DUSP1,DUSP4,EGR2,EREG,IRAK2,MAPK6,MAP3K8,SIK1,PLK2,DUSP6,EIF2AK3,FUT1,YOD1,EPHA2,DUSP10,SGK1,DUSP5,LONRF3,YRDC,ZC3H12A,PIGA,TDG,VCPKMT,PDP1,VIMP,CYR61,DCUN1D2,TIPARP,THUMPD2,PGM3,USP36,UBC,FICD,DNAJC3,TNFAIP3,MAP3K14
GO:0050793	regulation of developmental process	33	2416	0.3	0.0013	9606.ENSP00000216037,9606.ENSP00000234420,9606.ENSP00000244869,9606.ENSP00000252809,9606.ENSP00000261845,9606.ENSP00000263339,9606.ENSP00000270162,9606.ENSP00000272233,9606.ENSP00000273668,9606.ENSP00000274289,9606.ENSP00000279488,9606.ENSP00000306512,9606.ENSP00000307235,9606.ENSP00000326737,9606.ENSP00000344741,9606.ENSP00000345393,9606.ENSP00000351209,9606.ENSP00000355866,9606.ENSP00000356438,…	XBP1,MSH6,EREG,GDF15,MAPK6,IL1A,SIK1,RHOB,EAF2,PLK2,DUSP6,CXCL8,EIF2AK3,TNFRSF12A,INSIG1,MAFF,EPHA2,DUSP10,PTGS2,CTGF,JUN,ANKRD1,TSC22D3,ZC3H12A,ERRFI1,EDN1,XDH,ZMYM5,TDG,CYR61,DDIT3,TNFAIP3,NR4A3
GO:2001233	regulation of apoptotic signaling pathway	11	388	0.61	0.0013	9606.ENSP00000216037,9606.ENSP00000263339,9606.ENSP00000307235,9606.ENSP00000326737,9606.ENSP00000344352,9606.ENSP00000356438,9606.ENSP00000358022,9606.ENSP00000381282,9606.ENSP00000409555,9606.ENSP00000448665,9606.ENSP00000481570	XBP1,IL1A,EIF2AK3,TNFRSF12A,ATF3,PTGS2,MCL1,VIMP,HERPUD1,DDIT3,TNFAIP3
GO:0007050	cell cycle arrest	7	149	0.83	0.0014	9606.ENSP00000200453,9606.ENSP00000239223,9606.ENSP00000306512,9606.ENSP00000338807,9606.ENSP00000349547,9606.ENSP00000360025,9606.ENSP00000448665	PPP1R15A,DUSP1,CXCL8,ZBTB49,RASSF1,GADD45A,DDIT3
GO:1904707	positive regulation of vascular smooth muscle cell proliferation	4	32	1.26	0.0014	9606.ENSP00000216037,9606.ENSP00000360266,9606.ENSP00000368683,9606.ENSP00000482027	XBP1,JUN,EDN1,NR4A3
GO:0006983	ER overload response	3	11	1.6	0.0015	9606.ENSP00000307235,9606.ENSP00000381282,9606.ENSP00000448665	EIF2AK3,VIMP,DDIT3
GO:0031669	cellular response to nutrient levels	8	206	0.75	0.0015	9606.ENSP00000167588,9606.ENSP00000216037,9606.ENSP00000253063,9606.ENSP00000307235,9606.ENSP00000344352,9606.ENSP00000356438,9606.ENSP00000360266,9606.ENSP00000362179	KRT20,XBP1,SESN2,EIF2AK3,ATF3,PTGS2,JUN,ZC3H12A
GO:0043406	positive regulation of MAP kinase activity	9	264	0.69	0.0015	9606.ENSP00000252809,9606.ENSP00000256458,9606.ENSP00000263056,9606.ENSP00000279488,9606.ENSP00000358596,9606.ENSP00000360025,9606.ENSP00000368683,9606.ENSP00000441543,9606.ENSP00000482657	GDF15,IRAK2,MAP3K8,DUSP6,DUSP5,GADD45A,EDN1,UBC,MAP3K14
GO:1901362	organic cyclic compound biosynthetic process	40	3230	0.25	0.0015	9606.ENSP00000216037,9606.ENSP00000228437,9606.ENSP00000242480,9606.ENSP00000244869,9606.ENSP00000245919,9606.ENSP00000256495,9606.ENSP00000264444,9606.ENSP00000273153,9606.ENSP00000273668,9606.ENSP00000277746,9606.ENSP00000310170,9606.ENSP00000312988,9606.ENSP00000325414,9606.ENSP00000337862,9606.ENSP00000338807,9606.ENSP00000344352,9606.ENSP00000344741,9606.ENSP00000345393,9606.ENSP00000350359,…	XBP1,PRDM4,EGR2,EREG,FOSB,BHLHE40,MXD1,CSRNP1,EAF2,NRBF2,FOSL1,NFKBIB,SERTAD3,OVOL1,ZBTB49,ATF3,INSIG1,MAFF,CREB5,SERTAD1,ZNF460,PTGS2,UAP1,CTGF,JUN,ZC3H12A,ZBTB43,TSPYL2,ZNF165,XDH,ZMYM5,TDG,ZNF527,NABP1,KLF6,PGM3,UBC,DDIT3,ZNF699,NR4A3
GO:0045934	negative regulation of nucleobase-containing compound metabolic process	23	1424	0.37	0.0016	9606.ENSP00000216037,9606.ENSP00000234420,9606.ENSP00000239223,9606.ENSP00000244869,9606.ENSP00000245919,9606.ENSP00000256495,9606.ENSP00000264444,9606.ENSP00000307305,9606.ENSP00000330074,9606.ENSP00000337862,9606.ENSP00000344352,9606.ENSP00000352119,9606.ENSP00000359216,9606.ENSP00000360266,9606.ENSP00000360762,9606.ENSP00000361458,9606.ENSP00000362179,9606.ENSP00000364591,9606.ENSP00000368683,…	XBP1,MSH6,DUSP1,EREG,FOSB,BHLHE40,MXD1,DDIT4,HIST1H1B,OVOL1,ATF3,HIST1H2AG,PTBP2,JUN,ANKRD1,TSC22D3,ZC3H12A,TSPYL2,EDN1,TDG,UBC,DDIT3,NR4A3
GO:0051239	regulation of multicellular organismal process	36	2788	0.27	0.0016	9606.ENSP00000216037,9606.ENSP00000230990,9606.ENSP00000234420,9606.ENSP00000242480,9606.ENSP00000244869,9606.ENSP00000252809,9606.ENSP00000261845,9606.ENSP00000263339,9606.ENSP00000265138,9606.ENSP00000272233,9606.ENSP00000273668,9606.ENSP00000274289,9606.ENSP00000279488,9606.ENSP00000306512,9606.ENSP00000307235,9606.ENSP00000326737,9606.ENSP00000345393,9606.ENSP00000351209,9606.ENSP00000355866,…	XBP1,HBEGF,MSH6,EGR2,EREG,GDF15,MAPK6,IL1A,ARRDC3,RHOB,EAF2,PLK2,DUSP6,CXCL8,EIF2AK3,TNFRSF12A,MAFF,EPHA2,DUSP10,PTGS2,SGK1,CTGF,JUN,ANKRD1,TSC22D3,ZC3H12A,ERRFI1,EDN1,XDH,TDG,HRH1,VIMP,CYR61,DDIT3,TNFAIP3,NR4A3
GO:0006351	transcription, DNA-templated	34	2569	0.28	0.0017	9606.ENSP00000216037,9606.ENSP00000228437,9606.ENSP00000242480,9606.ENSP00000244869,9606.ENSP00000245919,9606.ENSP00000256495,9606.ENSP00000264444,9606.ENSP00000273153,9606.ENSP00000273668,9606.ENSP00000277746,9606.ENSP00000310170,9606.ENSP00000312988,9606.ENSP00000325414,9606.ENSP00000337862,9606.ENSP00000338807,9606.ENSP00000344352,9606.ENSP00000345393,9606.ENSP00000350359,9606.ENSP00000350633,…	XBP1,PRDM4,EGR2,EREG,FOSB,BHLHE40,MXD1,CSRNP1,EAF2,NRBF2,FOSL1,NFKBIB,SERTAD3,OVOL1,ZBTB49,ATF3,MAFF,CREB5,SERTAD1,ZNF460,CTGF,JUN,ZC3H12A,ZBTB43,TSPYL2,ZNF165,ZMYM5,TDG,ZNF527,NABP1,KLF6,DDIT3,ZNF699,NR4A3
GO:0009612	response to mechanical stimulus	8	210	0.74	0.0017	9606.ENSP00000245919,9606.ENSP00000310170,9606.ENSP00000356438,9606.ENSP00000360025,9606.ENSP00000360266,9606.ENSP00000360762,9606.ENSP00000368683,9606.ENSP00000482657	FOSB,FOSL1,PTGS2,GADD45A,JUN,ANKRD1,EDN1,MAP3K14
GO:0035295	tube development	16	793	0.47	0.0017	9606.ENSP00000216037,9606.ENSP00000244869,9606.ENSP00000272233,9606.ENSP00000306512,9606.ENSP00000307235,9606.ENSP00000326737,9606.ENSP00000351209,9606.ENSP00000356438,9606.ENSP00000356954,9606.ENSP00000360266,9606.ENSP00000362179,9606.ENSP00000366702,9606.ENSP00000368683,9606.ENSP00000398736,9606.ENSP00000420612,9606.ENSP00000482027	XBP1,EREG,RHOB,CXCL8,EIF2AK3,TNFRSF12A,EPHA2,PTGS2,CTGF,JUN,ZC3H12A,ERRFI1,EDN1,CYR61,TIPARP,NR4A3
GO:0051090	regulation of DNA-binding transcription factor activity	11	403	0.6	0.0017	9606.ENSP00000256458,9606.ENSP00000256495,9606.ENSP00000270162,9606.ENSP00000310170,9606.ENSP00000356832,9606.ENSP00000360266,9606.ENSP00000362179,9606.ENSP00000368683,9606.ENSP00000441543,9606.ENSP00000448665,9606.ENSP00000481570	IRAK2,BHLHE40,SIK1,FOSL1,SGK1,JUN,ZC3H12A,EDN1,UBC,DDIT3,TNFAIP3
GO:1900744	regulation of p38MAPK cascade	4	34	1.23	0.0017	9606.ENSP00000355866,9606.ENSP00000360025,9606.ENSP00000362179,9606.ENSP00000368727	DUSP10,GADD45A,ZC3H12A,XDH
GO:1990440	positive regulation of transcription from RNA polymerase II promoter in response to endoplasmic reticulum stress	3	12	1.56	0.0017	9606.ENSP00000216037,9606.ENSP00000344352,9606.ENSP00000448665	XBP1,ATF3,DDIT3
GO:0097193	intrinsic apoptotic signaling pathway	7	158	0.81	0.0018	9606.ENSP00000200453,9606.ENSP00000216037,9606.ENSP00000234420,9606.ENSP00000307305,9606.ENSP00000351209,9606.ENSP00000358022,9606.ENSP00000448665	PPP1R15A,XBP1,MSH6,DDIT4,EPHA2,MCL1,DDIT3
GO:1900182	positive regulation of protein localization to nucleus	5	69	1.02	0.0019	9606.ENSP00000216037,9606.ENSP00000253063,9606.ENSP00000307235,9606.ENSP00000356438,9606.ENSP00000362179	XBP1,SESN2,EIF2AK3,PTGS2,ZC3H12A
GO:2001242	regulation of intrinsic apoptotic signaling pathway	7	159	0.8	0.0019	9606.ENSP00000216037,9606.ENSP00000307235,9606.ENSP00000356438,9606.ENSP00000358022,9606.ENSP00000381282,9606.ENSP00000409555,9606.ENSP00000448665	XBP1,EIF2AK3,PTGS2,MCL1,VIMP,HERPUD1,DDIT3
GO:0009719	response to endogenous stimulus	22	1353	0.37	0.002	9606.ENSP00000216037,9606.ENSP00000239223,9606.ENSP00000242480,9606.ENSP00000244869,9606.ENSP00000245919,9606.ENSP00000252809,9606.ENSP00000253063,9606.ENSP00000270162,9606.ENSP00000306512,9606.ENSP00000307305,9606.ENSP00000310170,9606.ENSP00000356438,9606.ENSP00000356954,9606.ENSP00000360266,9606.ENSP00000360762,9606.ENSP00000366702,9606.ENSP00000368683,9606.ENSP00000380247,9606.ENSP00000381282,…	XBP1,DUSP1,EGR2,EREG,FOSB,GDF15,SESN2,SIK1,CXCL8,DDIT4,FOSL1,PTGS2,CTGF,JUN,ANKRD1,ERRFI1,EDN1,HRH1,VIMP,ESRP1,UBC,NR4A3
GO:0009991	response to extracellular stimulus	12	486	0.55	0.002	9606.ENSP00000167588,9606.ENSP00000216037,9606.ENSP00000252809,9606.ENSP00000253063,9606.ENSP00000307235,9606.ENSP00000310170,9606.ENSP00000344352,9606.ENSP00000356438,9606.ENSP00000360266,9606.ENSP00000362159,9606.ENSP00000362179,9606.ENSP00000448665	KRT20,XBP1,GDF15,SESN2,EIF2AK3,FOSL1,ATF3,PTGS2,JUN,SLC25A25,ZC3H12A,DDIT3
GO:0032675	regulation of interleukin-6 production	6	112	0.89	0.002	9606.ENSP00000216037,9606.ENSP00000244869,9606.ENSP00000263339,9606.ENSP00000362179,9606.ENSP00000381282,9606.ENSP00000481570	XBP1,EREG,IL1A,ZC3H12A,VIMP,TNFAIP3
GO:0042542	response to hydrogen peroxide	6	112	0.89	0.002	9606.ENSP00000239223,9606.ENSP00000272233,9606.ENSP00000310170,9606.ENSP00000360266,9606.ENSP00000481570,9606.ENSP00000482027	DUSP1,RHOB,FOSL1,JUN,TNFAIP3,NR4A3
GO:0045766	positive regulation of angiogenesis	7	162	0.8	0.002	9606.ENSP00000216037,9606.ENSP00000263339,9606.ENSP00000272233,9606.ENSP00000274289,9606.ENSP00000306512,9606.ENSP00000356438,9606.ENSP00000362179	XBP1,IL1A,RHOB,PLK2,CXCL8,PTGS2,ZC3H12A
GO:1900102	negative regulation of endoplasmic reticulum unfolded protein response	3	13	1.52	0.002	9606.ENSP00000200453,9606.ENSP00000216037,9606.ENSP00000249356	PPP1R15A,XBP1,DNAJB9
GO:0042149	cellular response to glucose starvation	4	37	1.2	0.0021	9606.ENSP00000216037,9606.ENSP00000253063,9606.ENSP00000307235,9606.ENSP00000362179	XBP1,SESN2,EIF2AK3,ZC3H12A
GO:0045862	positive regulation of proteolysis	10	347	0.62	0.0021	9606.ENSP00000216037,9606.ENSP00000274289,9606.ENSP00000307235,9606.ENSP00000314619,9606.ENSP00000356954,9606.ENSP00000360690,9606.ENSP00000362179,9606.ENSP00000368727,9606.ENSP00000398736,9606.ENSP00000409555	XBP1,PLK2,EIF2AK3,ZFAND2A,CTGF,LONRF3,ZC3H12A,XDH,CYR61,HERPUD1
GO:1901701	cellular response to oxygen-containing compound	17	896	0.44	0.0021	9606.ENSP00000216037,9606.ENSP00000253063,9606.ENSP00000256458,9606.ENSP00000272233,9606.ENSP00000306512,9606.ENSP00000307305,9606.ENSP00000312988,9606.ENSP00000344741,9606.ENSP00000356438,9606.ENSP00000360266,9606.ENSP00000360762,9606.ENSP00000362179,9606.ENSP00000366702,9606.ENSP00000368683,9606.ENSP00000381282,9606.ENSP00000481570,9606.ENSP00000482027	XBP1,SESN2,IRAK2,RHOB,CXCL8,DDIT4,NFKBIB,INSIG1,PTGS2,JUN,ANKRD1,ZC3H12A,ERRFI1,EDN1,VIMP,TNFAIP3,NR4A3
GO:1905898	positive regulation of response to endoplasmic reticulum stress	4	37	1.2	0.0021	9606.ENSP00000200453,9606.ENSP00000216037,9606.ENSP00000409555,9606.ENSP00000448665	PPP1R15A,XBP1,HERPUD1,DDIT3
GO:0010035	response to inorganic substance	12	491	0.55	0.0022	9606.ENSP00000239223,9606.ENSP00000245919,9606.ENSP00000263339,9606.ENSP00000272233,9606.ENSP00000307235,9606.ENSP00000310170,9606.ENSP00000356438,9606.ENSP00000360266,9606.ENSP00000362179,9606.ENSP00000368683,9606.ENSP00000481570,9606.ENSP00000482027	DUSP1,FOSB,IL1A,RHOB,EIF2AK3,FOSL1,PTGS2,JUN,ZC3H12A,EDN1,TNFAIP3,NR4A3
GO:0051707	response to other organism	20	1173	0.39	0.0022	9606.ENSP00000216037,9606.ENSP00000227752,9606.ENSP00000256458,9606.ENSP00000296026,9606.ENSP00000306512,9606.ENSP00000307305,9606.ENSP00000310170,9606.ENSP00000312988,9606.ENSP00000331748,9606.ENSP00000355866,9606.ENSP00000356438,9606.ENSP00000360266,9606.ENSP00000360762,9606.ENSP00000362179,9606.ENSP00000368683,9606.ENSP00000381282,9606.ENSP00000427279,9606.ENSP00000473631,9606.ENSP00000481570,…	XBP1,IL10RA,IRAK2,CXCL3,CXCL8,DDIT4,FOSL1,NFKBIB,RAB12,DUSP10,PTGS2,JUN,ANKRD1,ZC3H12A,EDN1,VIMP,CXCL2,DNAJC3,TNFAIP3,MAP3K14
GO:0007169	transmembrane receptor protein tyrosine kinase signaling pathway	12	499	0.54	0.0025	9606.ENSP00000216037,9606.ENSP00000230990,9606.ENSP00000244869,9606.ENSP00000252809,9606.ENSP00000273153,9606.ENSP00000307235,9606.ENSP00000307305,9606.ENSP00000351209,9606.ENSP00000356954,9606.ENSP00000405738,9606.ENSP00000420612,9606.ENSP00000482027	XBP1,HBEGF,EREG,GDF15,CSRNP1,EIF2AK3,DDIT4,EPHA2,CTGF,ESRP1,TIPARP,NR4A3
GO:0009653	anatomical structure morphogenesis	28	1992	0.31	0.0025	9606.ENSP00000216037,9606.ENSP00000230990,9606.ENSP00000239223,9606.ENSP00000240100,9606.ENSP00000242480,9606.ENSP00000244869,9606.ENSP00000259874,9606.ENSP00000272233,9606.ENSP00000273153,9606.ENSP00000306512,9606.ENSP00000307235,9606.ENSP00000326737,9606.ENSP00000344741,9606.ENSP00000351209,9606.ENSP00000356438,9606.ENSP00000356832,9606.ENSP00000356954,9606.ENSP00000357842,9606.ENSP00000358596,…	XBP1,HBEGF,DUSP1,DUSP4,EGR2,EREG,IER3,RHOB,CSRNP1,CXCL8,EIF2AK3,TNFRSF12A,INSIG1,EPHA2,PTGS2,SGK1,CTGF,TUFT1,DUSP5,JUN,PARD6B,ANKRD1,ZC3H12A,ERRFI1,EDN1,CYR61,TIPARP,NR4A3
GO:0043085	positive regulation of catalytic activity	22	1381	0.36	0.0025	9606.ENSP00000200453,9606.ENSP00000234420,9606.ENSP00000244869,9606.ENSP00000252809,9606.ENSP00000256458,9606.ENSP00000263056,9606.ENSP00000265138,9606.ENSP00000279488,9606.ENSP00000307235,9606.ENSP00000351209,9606.ENSP00000356529,9606.ENSP00000356954,9606.ENSP00000358596,9606.ENSP00000360025,9606.ENSP00000360266,9606.ENSP00000366702,9606.ENSP00000368683,9606.ENSP00000368727,9606.ENSP00000398736,…	PPP1R15A,MSH6,EREG,GDF15,IRAK2,MAP3K8,ARRDC3,DUSP6,EIF2AK3,EPHA2,RGS16,CTGF,DUSP5,GADD45A,JUN,ERRFI1,EDN1,XDH,CYR61,DCUN1D2,UBC,MAP3K14
GO:0045598	regulation of fat cell differentiation	6	120	0.86	0.0027	9606.ENSP00000216037,9606.ENSP00000344741,9606.ENSP00000355866,9606.ENSP00000356438,9606.ENSP00000362179,9606.ENSP00000448665	XBP1,INSIG1,DUSP10,PTGS2,ZC3H12A,DDIT3
GO:1901652	response to peptide	11	431	0.57	0.0027	9606.ENSP00000216037,9606.ENSP00000242480,9606.ENSP00000244869,9606.ENSP00000253063,9606.ENSP00000356438,9606.ENSP00000356954,9606.ENSP00000366702,9606.ENSP00000368683,9606.ENSP00000381282,9606.ENSP00000481570,9606.ENSP00000482027	XBP1,EGR2,EREG,SESN2,PTGS2,CTGF,ERRFI1,EDN1,VIMP,TNFAIP3,NR4A3
GO:0006464	cellular protein modification process	37	2999	0.25	0.0028	9606.ENSP00000200453,9606.ENSP00000222803,9606.ENSP00000228437,9606.ENSP00000230990,9606.ENSP00000239223,9606.ENSP00000240100,9606.ENSP00000242480,9606.ENSP00000244869,9606.ENSP00000256458,9606.ENSP00000261845,9606.ENSP00000263056,9606.ENSP00000270162,9606.ENSP00000274289,9606.ENSP00000279488,9606.ENSP00000307235,9606.ENSP00000312021,9606.ENSP00000326813,9606.ENSP00000351209,9606.ENSP00000355866,…	PPP1R15A,FKBP14,PRDM4,HBEGF,DUSP1,DUSP4,EGR2,EREG,IRAK2,MAPK6,MAP3K8,SIK1,PLK2,DUSP6,EIF2AK3,FUT1,YOD1,EPHA2,DUSP10,SGK1,DUSP5,LONRF3,ZC3H12A,PIGA,VCPKMT,PDP1,VIMP,CYR61,DCUN1D2,TIPARP,PGM3,USP36,UBC,FICD,DNAJC3,TNFAIP3,MAP3K14
GO:0043434	response to peptide hormone	10	362	0.6	0.0028	9606.ENSP00000216037,9606.ENSP00000242480,9606.ENSP00000244869,9606.ENSP00000253063,9606.ENSP00000356438,9606.ENSP00000356954,9606.ENSP00000366702,9606.ENSP00000368683,9606.ENSP00000381282,9606.ENSP00000482027	XBP1,EGR2,EREG,SESN2,PTGS2,CTGF,ERRFI1,EDN1,VIMP,NR4A3
GO:0071495	cellular response to endogenous stimulus	19	1106	0.4	0.0028	9606.ENSP00000216037,9606.ENSP00000239223,9606.ENSP00000245919,9606.ENSP00000252809,9606.ENSP00000253063,9606.ENSP00000270162,9606.ENSP00000306512,9606.ENSP00000307305,9606.ENSP00000356438,9606.ENSP00000356954,9606.ENSP00000360266,9606.ENSP00000360762,9606.ENSP00000366702,9606.ENSP00000368683,9606.ENSP00000380247,9606.ENSP00000381282,9606.ENSP00000405738,9606.ENSP00000441543,9606.ENSP00000482027	XBP1,DUSP1,FOSB,GDF15,SESN2,SIK1,CXCL8,DDIT4,PTGS2,CTGF,JUN,ANKRD1,ERRFI1,EDN1,HRH1,VIMP,ESRP1,UBC,NR4A3
GO:0044267	cellular protein metabolic process	42	3603	0.23	0.0031	9606.ENSP00000200453,9606.ENSP00000216037,9606.ENSP00000222803,9606.ENSP00000228437,9606.ENSP00000230990,9606.ENSP00000239223,9606.ENSP00000240100,9606.ENSP00000242480,9606.ENSP00000244869,9606.ENSP00000249356,9606.ENSP00000256458,9606.ENSP00000261845,9606.ENSP00000263056,9606.ENSP00000270162,9606.ENSP00000274289,9606.ENSP00000279488,9606.ENSP00000307235,9606.ENSP00000312021,9606.ENSP00000326813,…	PPP1R15A,XBP1,FKBP14,PRDM4,HBEGF,DUSP1,DUSP4,EGR2,EREG,DNAJB9,IRAK2,MAPK6,MAP3K8,SIK1,PLK2,DUSP6,EIF2AK3,FUT1,YOD1,RAB12,EPHA2,DUSP10,SGK1,DUSP5,LONRF3,ZC3H12A,PIGA,VCPKMT,PDP1,VIMP,CYR61,HERPUD1,DCUN1D2,TIPARP,PGM3,USP36,UBC,FICD,DDIT3,DNAJC3,TNFAIP3,MAP3K14
GO:0045926	negative regulation of growth	8	235	0.69	0.0031	9606.ENSP00000252809,9606.ENSP00000253063,9606.ENSP00000273668,9606.ENSP00000325414,9606.ENSP00000355374,9606.ENSP00000355866,9606.ENSP00000364591,9606.ENSP00000427108	GDF15,SESN2,EAF2,SERTAD3,OSGIN1,DUSP10,TSPYL2,CDKN2AIP
GO:0061041	regulation of wound healing	6	124	0.85	0.0031	9606.ENSP00000216037,9606.ENSP00000230990,9606.ENSP00000326737,9606.ENSP00000355866,9606.ENSP00000368683,9606.ENSP00000481570	XBP1,HBEGF,TNFRSF12A,DUSP10,EDN1,TNFAIP3
GO:0071243	cellular response to arsenic-containing substance	3	16	1.43	0.0032	9606.ENSP00000314619,9606.ENSP00000344352,9606.ENSP00000362179	ZFAND2A,ATF3,ZC3H12A
GO:0009725	response to hormone	16	854	0.43	0.0034	9606.ENSP00000216037,9606.ENSP00000239223,9606.ENSP00000242480,9606.ENSP00000244869,9606.ENSP00000245919,9606.ENSP00000253063,9606.ENSP00000270162,9606.ENSP00000307305,9606.ENSP00000310170,9606.ENSP00000356438,9606.ENSP00000356954,9606.ENSP00000360266,9606.ENSP00000366702,9606.ENSP00000368683,9606.ENSP00000381282,9606.ENSP00000482027	XBP1,DUSP1,EGR2,EREG,FOSB,SESN2,SIK1,DDIT4,FOSL1,PTGS2,CTGF,JUN,ERRFI1,EDN1,VIMP,NR4A3
GO:0045787	positive regulation of cell cycle	10	376	0.59	0.0037	9606.ENSP00000244869,9606.ENSP00000263339,9606.ENSP00000274289,9606.ENSP00000310170,9606.ENSP00000337862,9606.ENSP00000349547,9606.ENSP00000356954,9606.ENSP00000360025,9606.ENSP00000368683,9606.ENSP00000482027	EREG,IL1A,PLK2,FOSL1,OVOL1,RASSF1,CTGF,GADD45A,EDN1,NR4A3
GO:0071901	negative regulation of protein serine/threonine kinase activity	6	130	0.83	0.0039	9606.ENSP00000239223,9606.ENSP00000240100,9606.ENSP00000279488,9606.ENSP00000355866,9606.ENSP00000358596,9606.ENSP00000481570	DUSP1,DUSP4,DUSP6,DUSP10,DUSP5,TNFAIP3
GO:0050678	regulation of epithelial cell proliferation	9	311	0.62	0.004	9606.ENSP00000216037,9606.ENSP00000244869,9606.ENSP00000273668,9606.ENSP00000355866,9606.ENSP00000360266,9606.ENSP00000366702,9606.ENSP00000368727,9606.ENSP00000481570,9606.ENSP00000482027	XBP1,EREG,EAF2,DUSP10,JUN,ERRFI1,XDH,TNFAIP3,NR4A3
GO:0031667	response to nutrient levels	11	455	0.54	0.0041	9606.ENSP00000167588,9606.ENSP00000216037,9606.ENSP00000252809,9606.ENSP00000253063,9606.ENSP00000307235,9606.ENSP00000344352,9606.ENSP00000356438,9606.ENSP00000360266,9606.ENSP00000362159,9606.ENSP00000362179,9606.ENSP00000448665	KRT20,XBP1,GDF15,SESN2,EIF2AK3,ATF3,PTGS2,JUN,SLC25A25,ZC3H12A,DDIT3
GO:0007167	enzyme linked receptor protein signaling pathway	14	698	0.46	0.0042	9606.ENSP00000216037,9606.ENSP00000230990,9606.ENSP00000244869,9606.ENSP00000252809,9606.ENSP00000273153,9606.ENSP00000307235,9606.ENSP00000307305,9606.ENSP00000351209,9606.ENSP00000356954,9606.ENSP00000360266,9606.ENSP00000405738,9606.ENSP00000420612,9606.ENSP00000441543,9606.ENSP00000482027	XBP1,HBEGF,EREG,GDF15,CSRNP1,EIF2AK3,DDIT4,EPHA2,CTGF,JUN,ESRP1,TIPARP,UBC,NR4A3
GO:0014070	response to organic cyclic compound	16	873	0.42	0.0042	9606.ENSP00000239223,9606.ENSP00000245919,9606.ENSP00000279488,9606.ENSP00000307305,9606.ENSP00000310170,9606.ENSP00000344741,9606.ENSP00000356438,9606.ENSP00000356954,9606.ENSP00000360266,9606.ENSP00000360762,9606.ENSP00000362179,9606.ENSP00000366702,9606.ENSP00000368683,9606.ENSP00000380247,9606.ENSP00000420612,9606.ENSP00000482027	DUSP1,FOSB,DUSP6,DDIT4,FOSL1,INSIG1,PTGS2,CTGF,JUN,ANKRD1,ZC3H12A,ERRFI1,EDN1,HRH1,TIPARP,NR4A3
GO:0035994	response to muscle stretch	3	18	1.38	0.0042	9606.ENSP00000360266,9606.ENSP00000360762,9606.ENSP00000368683	JUN,ANKRD1,EDN1
GO:0048731	system development	46	4144	0.21	0.0042	9606.ENSP00000167588,9606.ENSP00000216037,9606.ENSP00000230990,9606.ENSP00000234420,9606.ENSP00000242480,9606.ENSP00000244869,9606.ENSP00000249356,9606.ENSP00000261845,9606.ENSP00000265138,9606.ENSP00000270162,9606.ENSP00000272233,9606.ENSP00000273153,9606.ENSP00000274289,9606.ENSP00000306512,9606.ENSP00000307235,9606.ENSP00000307305,9606.ENSP00000310170,9606.ENSP00000326737,9606.ENSP00000337862,…	KRT20,XBP1,HBEGF,MSH6,EGR2,EREG,DNAJB9,MAPK6,ARRDC3,SIK1,RHOB,CSRNP1,PLK2,CXCL8,EIF2AK3,DDIT4,FOSL1,TNFRSF12A,OVOL1,ATF3,INSIG1,MAFF,EPHA2,DUSP10,PTGS2,SGK1,CTGF,TUFT1,PTBP2,JUN,PARD6B,ANKRD1,SLC25A25,ZC3H12A,ERRFI1,GPCPD1,EDN1,XDH,CYR61,KLF6,TIPARP,PGM3,MANF,DDIT3,TNFAIP3,NR4A3
GO:0000302	response to reactive oxygen species	7	189	0.73	0.0044	9606.ENSP00000239223,9606.ENSP00000272233,9606.ENSP00000310170,9606.ENSP00000360266,9606.ENSP00000368683,9606.ENSP00000481570,9606.ENSP00000482027	DUSP1,RHOB,FOSL1,JUN,EDN1,TNFAIP3,NR4A3
GO:0051240	positive regulation of multicellular organismal process	23	1551	0.33	0.0045	9606.ENSP00000216037,9606.ENSP00000230990,9606.ENSP00000234420,9606.ENSP00000244869,9606.ENSP00000261845,9606.ENSP00000263339,9606.ENSP00000272233,9606.ENSP00000274289,9606.ENSP00000306512,9606.ENSP00000307235,9606.ENSP00000326737,9606.ENSP00000355866,9606.ENSP00000356438,9606.ENSP00000356954,9606.ENSP00000360266,9606.ENSP00000360762,9606.ENSP00000362179,9606.ENSP00000368683,9606.ENSP00000380247,…	XBP1,HBEGF,MSH6,EREG,MAPK6,IL1A,RHOB,PLK2,CXCL8,EIF2AK3,TNFRSF12A,DUSP10,PTGS2,CTGF,JUN,ANKRD1,ZC3H12A,EDN1,HRH1,CYR61,DDIT3,TNFAIP3,NR4A3
GO:0002684	positive regulation of immune system process	16	882	0.42	0.0046	9606.ENSP00000216037,9606.ENSP00000234420,9606.ENSP00000244869,9606.ENSP00000256458,9606.ENSP00000263056,9606.ENSP00000263339,9606.ENSP00000296026,9606.ENSP00000306512,9606.ENSP00000355866,9606.ENSP00000360266,9606.ENSP00000362179,9606.ENSP00000368683,9606.ENSP00000427279,9606.ENSP00000441543,9606.ENSP00000481570,9606.ENSP00000482027	XBP1,MSH6,EREG,IRAK2,MAP3K8,IL1A,CXCL3,CXCL8,DUSP10,JUN,ZC3H12A,EDN1,CXCL2,UBC,TNFAIP3,NR4A3
GO:0032720	negative regulation of tumor necrosis factor production	4	48	1.08	0.0047	9606.ENSP00000362179,9606.ENSP00000366702,9606.ENSP00000381282,9606.ENSP00000481570	ZC3H12A,ERRFI1,VIMP,TNFAIP3
GO:1902236	negative regulation of endoplasmic reticulum stress-induced intrinsic apoptotic signaling pathway	3	19	1.36	0.0047	9606.ENSP00000216037,9606.ENSP00000381282,9606.ENSP00000409555	XBP1,VIMP,HERPUD1
GO:0006139	nucleobase-containing compound metabolic process	49	4551	0.19	0.0048	9606.ENSP00000216037,9606.ENSP00000228437,9606.ENSP00000234420,9606.ENSP00000242480,9606.ENSP00000244869,9606.ENSP00000245919,9606.ENSP00000253063,9606.ENSP00000256495,9606.ENSP00000264444,9606.ENSP00000273153,9606.ENSP00000273668,9606.ENSP00000277746,9606.ENSP00000278590,9606.ENSP00000310170,9606.ENSP00000312988,9606.ENSP00000325414,9606.ENSP00000337862,9606.ENSP00000338807,9606.ENSP00000344352,…	XBP1,PRDM4,MSH6,EGR2,EREG,FOSB,SESN2,BHLHE40,MXD1,CSRNP1,EAF2,NRBF2,ZC3H12C,FOSL1,NFKBIB,SERTAD3,OVOL1,ZBTB49,ATF3,MAFF,CREB5,SERTAD1,EPHA2,ZNF460,PTGS2,UAP1,CTGF,PTBP2,GADD45A,JUN,YRDC,SLC25A25,ZC3H12A,ZBTB43,TSPYL2,ZNF165,XDH,ZMYM5,TDG,ZNF527,NABP1,ESRP1,KLF6,THUMPD2,PGM3,UBC,DDIT3,ZNF699,NR4A3
GO:0036491	regulation of translation initiation in response to endoplasmic reticulum stress	2	3	1.99	0.0048	9606.ENSP00000307235,9606.ENSP00000473631	EIF2AK3,DNAJC3
GO:0000165	MAPK cascade	9	323	0.61	0.0049	9606.ENSP00000230990,9606.ENSP00000244869,9606.ENSP00000256458,9606.ENSP00000261845,9606.ENSP00000263056,9606.ENSP00000279488,9606.ENSP00000358596,9606.ENSP00000441543,9606.ENSP00000482657	HBEGF,EREG,IRAK2,MAPK6,MAP3K8,DUSP6,DUSP5,UBC,MAP3K14
GO:0006470	protein dephosphorylation	7	194	0.72	0.0049	9606.ENSP00000200453,9606.ENSP00000239223,9606.ENSP00000240100,9606.ENSP00000279488,9606.ENSP00000355866,9606.ENSP00000358596,9606.ENSP00000379503	PPP1R15A,DUSP1,DUSP4,DUSP6,DUSP10,DUSP5,PDP1
GO:0007166	cell surface receptor signaling pathway	29	2198	0.28	0.0049	9606.ENSP00000216037,9606.ENSP00000227752,9606.ENSP00000230990,9606.ENSP00000244869,9606.ENSP00000252809,9606.ENSP00000256458,9606.ENSP00000263056,9606.ENSP00000263339,9606.ENSP00000273153,9606.ENSP00000296026,9606.ENSP00000306512,9606.ENSP00000307235,9606.ENSP00000307305,9606.ENSP00000326737,9606.ENSP00000351209,9606.ENSP00000356438,9606.ENSP00000356954,9606.ENSP00000358022,9606.ENSP00000360266,…	XBP1,IL10RA,HBEGF,EREG,GDF15,IRAK2,MAP3K8,IL1A,CSRNP1,CXCL3,CXCL8,EIF2AK3,DDIT4,TNFRSF12A,EPHA2,PTGS2,CTGF,MCL1,JUN,ZC3H12A,EDN1,ESRP1,TIPARP,AMOTL2,CXCL2,UBC,DDIT3,NR4A3,MAP3K14
GO:0009636	response to toxic substance	11	468	0.53	0.0049	9606.ENSP00000239223,9606.ENSP00000253063,9606.ENSP00000272233,9606.ENSP00000310170,9606.ENSP00000356438,9606.ENSP00000360266,9606.ENSP00000362179,9606.ENSP00000368683,9606.ENSP00000381282,9606.ENSP00000481570,9606.ENSP00000482027	DUSP1,SESN2,RHOB,FOSL1,PTGS2,JUN,ZC3H12A,EDN1,VIMP,TNFAIP3,NR4A3
GO:0032501	multicellular organismal process	64	6507	0.15	0.0049	9606.ENSP00000167588,9606.ENSP00000216037,9606.ENSP00000230990,9606.ENSP00000234420,9606.ENSP00000239223,9606.ENSP00000240100,9606.ENSP00000242480,9606.ENSP00000244869,9606.ENSP00000245919,9606.ENSP00000249356,9606.ENSP00000252809,9606.ENSP00000256495,9606.ENSP00000261845,9606.ENSP00000263339,9606.ENSP00000264444,9606.ENSP00000265138,9606.ENSP00000270162,9606.ENSP00000272233,9606.ENSP00000273153,…	KRT20,XBP1,HBEGF,MSH6,DUSP1,DUSP4,EGR2,EREG,FOSB,DNAJB9,GDF15,BHLHE40,MAPK6,IL1A,MXD1,ARRDC3,SIK1,RHOB,CSRNP1,PLK2,MPZL3,DUSP6,SEC24D,CXCL8,EIF2AK3,DDIT4,FOSL1,TNFRSF12A,OVOL1,ATF3,PEAR1,INSIG1,SPRY4,MAFF,EPHA2,OSGIN1,DUSP10,PTGS2,RGS16,SGK1,CTGF,TUFT1,MCL1,DUSP5,PTBP2,JUN,PARD6B,ANKRD1,SLC25A25,ZC3H12A,ERRFI1,GPCPD1,EDN1,XDH,ZMYM5,HRH1,CYR61,KLF6,TIPARP,PGM3,MANF,DDIT3,TNFAIP3,NR4A3
GO:0051347	positive regulation of transferase activity	13	630	0.48	0.0049	9606.ENSP00000244869,9606.ENSP00000252809,9606.ENSP00000256458,9606.ENSP00000263056,9606.ENSP00000265138,9606.ENSP00000279488,9606.ENSP00000358596,9606.ENSP00000360025,9606.ENSP00000368683,9606.ENSP00000398736,9606.ENSP00000417706,9606.ENSP00000441543,9606.ENSP00000482657	EREG,GDF15,IRAK2,MAP3K8,ARRDC3,DUSP6,DUSP5,GADD45A,EDN1,CYR61,DCUN1D2,UBC,MAP3K14
GO:0061448	connective tissue development	7	194	0.72	0.0049	9606.ENSP00000216037,9606.ENSP00000265138,9606.ENSP00000307235,9606.ENSP00000356954,9606.ENSP00000362159,9606.ENSP00000368683,9606.ENSP00000398736	XBP1,ARRDC3,EIF2AK3,CTGF,SLC25A25,EDN1,CYR61
GO:0010629	negative regulation of gene expression	24	1670	0.32	0.005	9606.ENSP00000216037,9606.ENSP00000244869,9606.ENSP00000245919,9606.ENSP00000253063,9606.ENSP00000256495,9606.ENSP00000264444,9606.ENSP00000307235,9606.ENSP00000330074,9606.ENSP00000337862,9606.ENSP00000344352,9606.ENSP00000352119,9606.ENSP00000356954,9606.ENSP00000359216,9606.ENSP00000360266,9606.ENSP00000360762,9606.ENSP00000361458,9606.ENSP00000362179,9606.ENSP00000368683,9606.ENSP00000368727,…	XBP1,EREG,FOSB,SESN2,BHLHE40,MXD1,EIF2AK3,HIST1H1B,OVOL1,ATF3,HIST1H2AG,CTGF,PTBP2,JUN,ANKRD1,TSC22D3,ZC3H12A,EDN1,XDH,TDG,TIPARP,UBC,DDIT3,NR4A3
GO:0048545	response to steroid hormone	9	324	0.6	0.005	9606.ENSP00000239223,9606.ENSP00000245919,9606.ENSP00000307305,9606.ENSP00000310170,9606.ENSP00000356438,9606.ENSP00000356954,9606.ENSP00000366702,9606.ENSP00000368683,9606.ENSP00000482027	DUSP1,FOSB,DDIT4,FOSL1,PTGS2,CTGF,ERRFI1,EDN1,NR4A3
GO:0032691	negative regulation of interleukin-1 beta production	3	20	1.34	0.0051	9606.ENSP00000362179,9606.ENSP00000366702,9606.ENSP00000481570	ZC3H12A,ERRFI1,TNFAIP3
GO:0009896	positive regulation of catabolic process	10	399	0.56	0.0052	9606.ENSP00000216037,9606.ENSP00000253063,9606.ENSP00000274289,9606.ENSP00000314619,9606.ENSP00000331748,9606.ENSP00000360690,9606.ENSP00000362179,9606.ENSP00000409555,9606.ENSP00000420612,9606.ENSP00000481570	XBP1,SESN2,PLK2,ZFAND2A,RAB12,LONRF3,ZC3H12A,HERPUD1,TIPARP,TNFAIP3
GO:0032436	positive regulation of proteasomal ubiquitin-dependent protein catabolic process	5	91	0.9	0.0052	9606.ENSP00000216037,9606.ENSP00000274289,9606.ENSP00000314619,9606.ENSP00000360690,9606.ENSP00000409555	XBP1,PLK2,ZFAND2A,LONRF3,HERPUD1
GO:0000122	negative regulation of transcription by RNA polymerase II	15	809	0.43	0.0053	9606.ENSP00000216037,9606.ENSP00000245919,9606.ENSP00000256495,9606.ENSP00000264444,9606.ENSP00000330074,9606.ENSP00000337862,9606.ENSP00000344352,9606.ENSP00000360266,9606.ENSP00000360762,9606.ENSP00000361458,9606.ENSP00000368683,9606.ENSP00000376611,9606.ENSP00000441543,9606.ENSP00000448665,9606.ENSP00000482027	XBP1,FOSB,BHLHE40,MXD1,HIST1H1B,OVOL1,ATF3,JUN,ANKRD1,TSC22D3,EDN1,TDG,UBC,DDIT3,NR4A3
GO:0070498	interleukin-1-mediated signaling pathway	4	51	1.06	0.0054	9606.ENSP00000256458,9606.ENSP00000263056,9606.ENSP00000263339,9606.ENSP00000441543	IRAK2,MAP3K8,IL1A,UBC
GO:0071363	cellular response to growth factor stimulus	11	477	0.52	0.0054	9606.ENSP00000216037,9606.ENSP00000252809,9606.ENSP00000306512,9606.ENSP00000307305,9606.ENSP00000356954,9606.ENSP00000360266,9606.ENSP00000360762,9606.ENSP00000366702,9606.ENSP00000368683,9606.ENSP00000405738,9606.ENSP00000441543	XBP1,GDF15,CXCL8,DDIT4,CTGF,JUN,ANKRD1,ERRFI1,EDN1,ESRP1,UBC
GO:0062012	regulation of small molecule metabolic process	9	332	0.59	0.0057	9606.ENSP00000253063,9606.ENSP00000270162,9606.ENSP00000307305,9606.ENSP00000344741,9606.ENSP00000356438,9606.ENSP00000379503,9606.ENSP00000380247,9606.ENSP00000381282,9606.ENSP00000482027	SESN2,SIK1,DDIT4,INSIG1,PTGS2,PDP1,HRH1,VIMP,NR4A3
GO:0035914	skeletal muscle cell differentiation	4	52	1.05	0.0058	9606.ENSP00000242480,9606.ENSP00000344352,9606.ENSP00000345393,9606.ENSP00000360762	EGR2,ATF3,MAFF,ANKRD1
GO:2000379	positive regulation of reactive oxygen species metabolic process	5	94	0.89	0.0059	9606.ENSP00000356438,9606.ENSP00000360025,9606.ENSP00000362179,9606.ENSP00000368683,9606.ENSP00000368727	PTGS2,GADD45A,ZC3H12A,EDN1,XDH
GO:0009987	cellular process	117	14652	0.06	0.006	9606.ENSP00000075120,9606.ENSP00000167588,9606.ENSP00000200453,9606.ENSP00000216037,9606.ENSP00000222803,9606.ENSP00000227752,9606.ENSP00000228437,9606.ENSP00000230990,9606.ENSP00000234420,9606.ENSP00000239223,9606.ENSP00000240100,9606.ENSP00000242480,9606.ENSP00000244869,9606.ENSP00000245919,9606.ENSP00000249356,9606.ENSP00000252809,9606.ENSP00000253063,9606.ENSP00000256458,9606.ENSP00000256495,…	SLC2A3,KRT20,PPP1R15A,XBP1,FKBP14,IL10RA,PRDM4,HBEGF,MSH6,DUSP1,DUSP4,EGR2,EREG,FOSB,DNAJB9,GDF15,SESN2,IRAK2,BHLHE40,IER3,MAPK6,MAP3K8,IL1A,COQ10B,MXD1,SIK1,RHOB,CSRNP1,EAF2,PLK2,NRBF2,ZC3H12C,MPZL3,DUSP6,SEC24D,CXCL3,CXCL8,EIF2AK3,DDIT4,FOSL1,FUT1,NFKBIB,ZFAND2A,SERTAD3,TNFRSF12A,YOD1,HIST1H1B,RAB12,OVOL1,ZBTB49,ATF3,PEAR1,INSIG1,MAFF,RASSF1,CREB5,SERTAD1,EPHA2,HIST1H2AG,ZNF460,OSGIN1,DUSP10,PT…
GO:0051896	regulation of protein kinase B signaling	7	203	0.7	0.006	9606.ENSP00000216037,9606.ENSP00000230990,9606.ENSP00000244869,9606.ENSP00000252809,9606.ENSP00000351209,9606.ENSP00000368727,9606.ENSP00000448665	XBP1,HBEGF,EREG,GDF15,EPHA2,XDH,DDIT3
GO:0010595	positive regulation of endothelial cell migration	5	96	0.88	0.0064	9606.ENSP00000272233,9606.ENSP00000274289,9606.ENSP00000356438,9606.ENSP00000362179,9606.ENSP00000368683	RHOB,PLK2,PTGS2,ZC3H12A,EDN1
GO:1903364	positive regulation of cellular protein catabolic process	6	147	0.77	0.0064	9606.ENSP00000216037,9606.ENSP00000274289,9606.ENSP00000314619,9606.ENSP00000360690,9606.ENSP00000409555,9606.ENSP00000481570	XBP1,PLK2,ZFAND2A,LONRF3,HERPUD1,TNFAIP3
GO:2001243	negative regulation of intrinsic apoptotic signaling pathway	5	96	0.88	0.0064	9606.ENSP00000216037,9606.ENSP00000356438,9606.ENSP00000358022,9606.ENSP00000381282,9606.ENSP00000409555	XBP1,PTGS2,MCL1,VIMP,HERPUD1
GO:0019221	cytokine-mediated signaling pathway	13	655	0.46	0.0066	9606.ENSP00000227752,9606.ENSP00000244869,9606.ENSP00000256458,9606.ENSP00000263056,9606.ENSP00000263339,9606.ENSP00000296026,9606.ENSP00000306512,9606.ENSP00000326737,9606.ENSP00000356438,9606.ENSP00000358022,9606.ENSP00000427279,9606.ENSP00000441543,9606.ENSP00000482657	IL10RA,EREG,IRAK2,MAP3K8,IL1A,CXCL3,CXCL8,TNFRSF12A,PTGS2,MCL1,CXCL2,UBC,MAP3K14
GO:0032058	positive regulation of translational initiation in response to stress	2	4	1.86	0.0066	9606.ENSP00000200453,9606.ENSP00000473631	PPP1R15A,DNAJC3
GO:0051771	negative regulation of nitric-oxide synthase biosynthetic process	2	4	1.86	0.0066	9606.ENSP00000368683,9606.ENSP00000381282	EDN1,VIMP
GO:0031329	regulation of cellular catabolic process	14	743	0.44	0.0067	9606.ENSP00000216037,9606.ENSP00000253063,9606.ENSP00000274289,9606.ENSP00000307305,9606.ENSP00000314619,9606.ENSP00000326813,9606.ENSP00000331748,9606.ENSP00000358022,9606.ENSP00000360690,9606.ENSP00000362179,9606.ENSP00000409555,9606.ENSP00000441214,9606.ENSP00000441543,9606.ENSP00000481570	XBP1,SESN2,PLK2,DDIT4,ZFAND2A,YOD1,RAB12,MCL1,LONRF3,ZC3H12A,HERPUD1,USP36,UBC,TNFAIP3
GO:0010594	regulation of endothelial cell migration	6	150	0.76	0.0069	9606.ENSP00000272233,9606.ENSP00000274289,9606.ENSP00000351209,9606.ENSP00000356438,9606.ENSP00000362179,9606.ENSP00000368683	RHOB,PLK2,EPHA2,PTGS2,ZC3H12A,EDN1
GO:0031331	positive regulation of cellular catabolic process	9	343	0.58	0.0069	9606.ENSP00000216037,9606.ENSP00000253063,9606.ENSP00000274289,9606.ENSP00000314619,9606.ENSP00000331748,9606.ENSP00000360690,9606.ENSP00000362179,9606.ENSP00000409555,9606.ENSP00000481570	XBP1,SESN2,PLK2,ZFAND2A,RAB12,LONRF3,ZC3H12A,HERPUD1,TNFAIP3
GO:1900745	positive regulation of p38MAPK cascade	3	23	1.28	0.0069	9606.ENSP00000360025,9606.ENSP00000362179,9606.ENSP00000368727	GADD45A,ZC3H12A,XDH
GO:0010469	regulation of signaling receptor activity	12	577	0.48	0.007	9606.ENSP00000230990,9606.ENSP00000244869,9606.ENSP00000252809,9606.ENSP00000263339,9606.ENSP00000296026,9606.ENSP00000306512,9606.ENSP00000355374,9606.ENSP00000356954,9606.ENSP00000366702,9606.ENSP00000368683,9606.ENSP00000427279,9606.ENSP00000432799	HBEGF,EREG,GDF15,IL1A,CXCL3,CXCL8,OSGIN1,CTGF,ERRFI1,EDN1,CXCL2,MANF
GO:0009894	regulation of catabolic process	15	840	0.41	0.0072	9606.ENSP00000216037,9606.ENSP00000253063,9606.ENSP00000274289,9606.ENSP00000307305,9606.ENSP00000314619,9606.ENSP00000326813,9606.ENSP00000331748,9606.ENSP00000358022,9606.ENSP00000360690,9606.ENSP00000362179,9606.ENSP00000409555,9606.ENSP00000420612,9606.ENSP00000441214,9606.ENSP00000441543,9606.ENSP00000481570	XBP1,SESN2,PLK2,DDIT4,ZFAND2A,YOD1,RAB12,MCL1,LONRF3,ZC3H12A,HERPUD1,TIPARP,USP36,UBC,TNFAIP3
GO:0035335	peptidyl-tyrosine dephosphorylation	5	100	0.86	0.0073	9606.ENSP00000239223,9606.ENSP00000240100,9606.ENSP00000279488,9606.ENSP00000355866,9606.ENSP00000358596	DUSP1,DUSP4,DUSP6,DUSP10,DUSP5
GO:0008285	negative regulation of cell population proliferation	13	669	0.45	0.0077	9606.ENSP00000239223,9606.ENSP00000244869,9606.ENSP00000263339,9606.ENSP00000273668,9606.ENSP00000306512,9606.ENSP00000310170,9606.ENSP00000337862,9606.ENSP00000338807,9606.ENSP00000355866,9606.ENSP00000356438,9606.ENSP00000360266,9606.ENSP00000368727,9606.ENSP00000481570	DUSP1,EREG,IL1A,EAF2,CXCL8,FOSL1,OVOL1,ZBTB49,DUSP10,PTGS2,JUN,XDH,TNFAIP3
GO:0009314	response to radiation	10	425	0.53	0.0077	9606.ENSP00000234420,9606.ENSP00000239223,9606.ENSP00000256495,9606.ENSP00000270162,9606.ENSP00000272233,9606.ENSP00000356438,9606.ENSP00000360025,9606.ENSP00000360266,9606.ENSP00000380247,9606.ENSP00000403683	MSH6,DUSP1,BHLHE40,SIK1,RHOB,PTGS2,GADD45A,JUN,HRH1,NABP1
GO:0010508	positive regulation of autophagy	5	103	0.85	0.0082	9606.ENSP00000216037,9606.ENSP00000253063,9606.ENSP00000274289,9606.ENSP00000331748,9606.ENSP00000362179	XBP1,SESN2,PLK2,RAB12,ZC3H12A
GO:0072593	reactive oxygen species metabolic process	5	103	0.85	0.0082	9606.ENSP00000253063,9606.ENSP00000307305,9606.ENSP00000356954,9606.ENSP00000368683,9606.ENSP00000398736	SESN2,DDIT4,CTGF,EDN1,CYR61
GO:0034612	response to tumor necrosis factor	7	217	0.67	0.0083	9606.ENSP00000306512,9606.ENSP00000326737,9606.ENSP00000356438,9606.ENSP00000360762,9606.ENSP00000362179,9606.ENSP00000368683,9606.ENSP00000482657	CXCL8,TNFRSF12A,PTGS2,ANKRD1,ZC3H12A,EDN1,MAP3K14
GO:0043433	negative regulation of DNA-binding transcription factor activity	6	157	0.74	0.0083	9606.ENSP00000256458,9606.ENSP00000256495,9606.ENSP00000270162,9606.ENSP00000362179,9606.ENSP00000448665,9606.ENSP00000481570	IRAK2,BHLHE40,SIK1,ZC3H12A,DDIT3,TNFAIP3
GO:0045732	positive regulation of protein catabolic process	7	217	0.67	0.0083	9606.ENSP00000216037,9606.ENSP00000274289,9606.ENSP00000314619,9606.ENSP00000360690,9606.ENSP00000409555,9606.ENSP00000420612,9606.ENSP00000481570	XBP1,PLK2,ZFAND2A,LONRF3,HERPUD1,TIPARP,TNFAIP3
GO:2001234	negative regulation of apoptotic signaling pathway	7	218	0.67	0.0084	9606.ENSP00000216037,9606.ENSP00000263339,9606.ENSP00000356438,9606.ENSP00000358022,9606.ENSP00000381282,9606.ENSP00000409555,9606.ENSP00000481570	XBP1,IL1A,PTGS2,MCL1,VIMP,HERPUD1,TNFAIP3
GO:0090304	nucleic acid metabolic process	43	3941	0.2	0.0085	9606.ENSP00000216037,9606.ENSP00000228437,9606.ENSP00000234420,9606.ENSP00000242480,9606.ENSP00000244869,9606.ENSP00000245919,9606.ENSP00000253063,9606.ENSP00000256495,9606.ENSP00000264444,9606.ENSP00000273153,9606.ENSP00000273668,9606.ENSP00000277746,9606.ENSP00000278590,9606.ENSP00000310170,9606.ENSP00000312988,9606.ENSP00000325414,9606.ENSP00000337862,9606.ENSP00000338807,9606.ENSP00000344352,…	XBP1,PRDM4,MSH6,EGR2,EREG,FOSB,SESN2,BHLHE40,MXD1,CSRNP1,EAF2,NRBF2,ZC3H12C,FOSL1,NFKBIB,SERTAD3,OVOL1,ZBTB49,ATF3,MAFF,CREB5,SERTAD1,ZNF460,CTGF,PTBP2,GADD45A,JUN,YRDC,ZC3H12A,ZBTB43,TSPYL2,ZNF165,ZMYM5,TDG,ZNF527,NABP1,ESRP1,KLF6,THUMPD2,UBC,DDIT3,ZNF699,NR4A3
GO:0006793	phosphorus metabolic process	27	2086	0.27	0.0091	9606.ENSP00000200453,9606.ENSP00000230990,9606.ENSP00000239223,9606.ENSP00000240100,9606.ENSP00000244869,9606.ENSP00000256458,9606.ENSP00000261845,9606.ENSP00000263056,9606.ENSP00000270162,9606.ENSP00000274289,9606.ENSP00000279488,9606.ENSP00000307235,9606.ENSP00000351209,9606.ENSP00000355866,9606.ENSP00000356438,9606.ENSP00000356832,9606.ENSP00000356903,9606.ENSP00000358596,9606.ENSP00000362159,…	PPP1R15A,HBEGF,DUSP1,DUSP4,EREG,IRAK2,MAPK6,MAP3K8,SIK1,PLK2,DUSP6,EIF2AK3,EPHA2,DUSP10,PTGS2,SGK1,UAP1,DUSP5,SLC25A25,GPCPD1,XDH,PIGA,TDG,PDP1,PGM3,UBC,MAP3K14
GO:0034599	cellular response to oxidative stress	7	222	0.66	0.0091	9606.ENSP00000216037,9606.ENSP00000253063,9606.ENSP00000272233,9606.ENSP00000360266,9606.ENSP00000362179,9606.ENSP00000381282,9606.ENSP00000481570	XBP1,SESN2,RHOB,JUN,ZC3H12A,VIMP,TNFAIP3
GO:0051128	regulation of cellular component organization	29	2306	0.26	0.0091	9606.ENSP00000200453,9606.ENSP00000216037,9606.ENSP00000227752,9606.ENSP00000230990,9606.ENSP00000239223,9606.ENSP00000244869,9606.ENSP00000252809,9606.ENSP00000253063,9606.ENSP00000261845,9606.ENSP00000263339,9606.ENSP00000273668,9606.ENSP00000274289,9606.ENSP00000310170,9606.ENSP00000325414,9606.ENSP00000326737,9606.ENSP00000330074,9606.ENSP00000344741,9606.ENSP00000349547,9606.ENSP00000351209,…	PPP1R15A,XBP1,IL10RA,HBEGF,DUSP1,EREG,GDF15,SESN2,MAPK6,IL1A,EAF2,PLK2,FOSL1,SERTAD3,TNFRSF12A,HIST1H1B,INSIG1,RASSF1,EPHA2,OSGIN1,SGK1,CTGF,JUN,ANKRD1,TSPYL2,EDN1,ZMYM5,CYR61,CDKN2AIP
GO:1901360	organic cyclic compound metabolic process	51	4963	0.17	0.0091	9606.ENSP00000216037,9606.ENSP00000228437,9606.ENSP00000234420,9606.ENSP00000242480,9606.ENSP00000244869,9606.ENSP00000245919,9606.ENSP00000253063,9606.ENSP00000256495,9606.ENSP00000264444,9606.ENSP00000273153,9606.ENSP00000273668,9606.ENSP00000277746,9606.ENSP00000278590,9606.ENSP00000310170,9606.ENSP00000312988,9606.ENSP00000325414,9606.ENSP00000337862,9606.ENSP00000338807,9606.ENSP00000344352,…	XBP1,PRDM4,MSH6,EGR2,EREG,FOSB,SESN2,BHLHE40,MXD1,CSRNP1,EAF2,NRBF2,ZC3H12C,FOSL1,NFKBIB,SERTAD3,OVOL1,ZBTB49,ATF3,INSIG1,MAFF,CREB5,SERTAD1,EPHA2,ZNF460,PTGS2,UAP1,CTGF,PTBP2,GADD45A,JUN,YRDC,SLC25A25,ZC3H12A,ZBTB43,TSPYL2,ZNF165,XDH,ZMYM5,TDG,ZNF527,NABP1,ESRP1,KLF6,TIPARP,THUMPD2,PGM3,UBC,DDIT3,ZNF699,NR4A3
GO:0045860	positive regulation of protein kinase activity	11	517	0.49	0.0092	9606.ENSP00000244869,9606.ENSP00000252809,9606.ENSP00000256458,9606.ENSP00000263056,9606.ENSP00000279488,9606.ENSP00000358596,9606.ENSP00000360025,9606.ENSP00000368683,9606.ENSP00000398736,9606.ENSP00000441543,9606.ENSP00000482657	EREG,GDF15,IRAK2,MAP3K8,DUSP6,DUSP5,GADD45A,EDN1,CYR61,UBC,MAP3K14
GO:0010575	positive regulation of vascular endothelial growth factor production	3	27	1.21	0.0098	9606.ENSP00000263339,9606.ENSP00000307235,9606.ENSP00000356438	IL1A,EIF2AK3,PTGS2
GO:0070423	nucleotide-binding oligomerization domain containing signaling pathway	3	27	1.21	0.0098	9606.ENSP00000256458,9606.ENSP00000441543,9606.ENSP00000481570	IRAK2,UBC,TNFAIP3
GO:0030308	negative regulation of cell growth	6	164	0.72	0.0099	9606.ENSP00000253063,9606.ENSP00000273668,9606.ENSP00000325414,9606.ENSP00000355374,9606.ENSP00000364591,9606.ENSP00000427108	SESN2,EAF2,SERTAD3,OSGIN1,TSPYL2,CDKN2AIP
GO:0007049	cell cycle	19	1263	0.34	0.0104	9606.ENSP00000200453,9606.ENSP00000234420,9606.ENSP00000239223,9606.ENSP00000244869,9606.ENSP00000261845,9606.ENSP00000263056,9606.ENSP00000270162,9606.ENSP00000272233,9606.ENSP00000274289,9606.ENSP00000306512,9606.ENSP00000337862,9606.ENSP00000338807,9606.ENSP00000349547,9606.ENSP00000360025,9606.ENSP00000360672,9606.ENSP00000364591,9606.ENSP00000403683,9606.ENSP00000448665,9606.ENSP00000484532	PPP1R15A,MSH6,DUSP1,EREG,MAPK6,MAP3K8,SIK1,RHOB,PLK2,CXCL8,OVOL1,ZBTB49,RASSF1,GADD45A,PARD6B,TSPYL2,NABP1,DDIT3,MIS12
GO:1904292	regulation of ERAD pathway	3	28	1.19	0.0107	9606.ENSP00000216037,9606.ENSP00000326813,9606.ENSP00000409555	XBP1,YOD1,HERPUD1
GO:0019216	regulation of lipid metabolic process	9	373	0.54	0.011	9606.ENSP00000216037,9606.ENSP00000270162,9606.ENSP00000277746,9606.ENSP00000344741,9606.ENSP00000356438,9606.ENSP00000360762,9606.ENSP00000379503,9606.ENSP00000398736,9606.ENSP00000482027	XBP1,SIK1,NRBF2,INSIG1,PTGS2,ANKRD1,PDP1,CYR61,NR4A3
GO:0032792	negative regulation of CREB transcription factor activity	2	6	1.68	0.011	9606.ENSP00000270162,9606.ENSP00000448665	SIK1,DDIT3
GO:0061043	regulation of vascular wound healing	2	6	1.68	0.011	9606.ENSP00000216037,9606.ENSP00000481570	XBP1,TNFAIP3
GO:2000377	regulation of reactive oxygen species metabolic process	6	169	0.71	0.0112	9606.ENSP00000356438,9606.ENSP00000360025,9606.ENSP00000362179,9606.ENSP00000368683,9606.ENSP00000368727,9606.ENSP00000381282	PTGS2,GADD45A,ZC3H12A,EDN1,XDH,VIMP
GO:0048513	animal organ development	34	2926	0.23	0.0115	9606.ENSP00000167588,9606.ENSP00000216037,9606.ENSP00000230990,9606.ENSP00000242480,9606.ENSP00000244869,9606.ENSP00000249356,9606.ENSP00000265138,9606.ENSP00000270162,9606.ENSP00000273153,9606.ENSP00000306512,9606.ENSP00000307235,9606.ENSP00000307305,9606.ENSP00000310170,9606.ENSP00000337862,9606.ENSP00000344352,9606.ENSP00000344741,9606.ENSP00000345393,9606.ENSP00000351209,9606.ENSP00000356438,…	KRT20,XBP1,HBEGF,EGR2,EREG,DNAJB9,ARRDC3,SIK1,CSRNP1,CXCL8,EIF2AK3,DDIT4,FOSL1,OVOL1,ATF3,INSIG1,MAFF,EPHA2,PTGS2,CTGF,TUFT1,PTBP2,JUN,ANKRD1,SLC25A25,ERRFI1,GPCPD1,EDN1,XDH,CYR61,KLF6,TIPARP,PGM3,NR4A3
GO:0046677	response to antibiotic	8	305	0.58	0.0121	9606.ENSP00000239223,9606.ENSP00000272233,9606.ENSP00000310170,9606.ENSP00000360266,9606.ENSP00000362179,9606.ENSP00000368683,9606.ENSP00000481570,9606.ENSP00000482027	DUSP1,RHOB,FOSL1,JUN,ZC3H12A,EDN1,TNFAIP3,NR4A3
GO:0007611	learning or memory	7	237	0.63	0.0124	9606.ENSP00000242480,9606.ENSP00000274289,9606.ENSP00000310170,9606.ENSP00000356438,9606.ENSP00000356832,9606.ENSP00000360266,9606.ENSP00000380247	EGR2,PLK2,FOSL1,PTGS2,SGK1,JUN,HRH1
GO:0006970	response to osmotic stress	4	68	0.93	0.0126	9606.ENSP00000354543,9606.ENSP00000356438,9606.ENSP00000361458,9606.ENSP00000366702	TSC22D2,PTGS2,TSC22D3,ERRFI1
GO:0042493	response to drug	15	900	0.38	0.0127	9606.ENSP00000239223,9606.ENSP00000245919,9606.ENSP00000272233,9606.ENSP00000279488,9606.ENSP00000307305,9606.ENSP00000310170,9606.ENSP00000356438,9606.ENSP00000360266,9606.ENSP00000360762,9606.ENSP00000362159,9606.ENSP00000362179,9606.ENSP00000366702,9606.ENSP00000368683,9606.ENSP00000481570,9606.ENSP00000482027	DUSP1,FOSB,RHOB,DUSP6,DDIT4,FOSL1,PTGS2,JUN,ANKRD1,SLC25A25,ZC3H12A,ERRFI1,EDN1,TNFAIP3,NR4A3
GO:0043086	negative regulation of catalytic activity	14	809	0.4	0.013	9606.ENSP00000200453,9606.ENSP00000239223,9606.ENSP00000240100,9606.ENSP00000279488,9606.ENSP00000355866,9606.ENSP00000356438,9606.ENSP00000358596,9606.ENSP00000360025,9606.ENSP00000366702,9606.ENSP00000379201,9606.ENSP00000409555,9606.ENSP00000446479,9606.ENSP00000473631,9606.ENSP00000481570	PPP1R15A,DUSP1,DUSP4,DUSP6,DUSP10,PTGS2,DUSP5,GADD45A,ERRFI1,VCPKMT,HERPUD1,FICD,DNAJC3,TNFAIP3
GO:0016070	RNA metabolic process	38	3430	0.21	0.0132	9606.ENSP00000216037,9606.ENSP00000228437,9606.ENSP00000242480,9606.ENSP00000244869,9606.ENSP00000245919,9606.ENSP00000256495,9606.ENSP00000264444,9606.ENSP00000273153,9606.ENSP00000273668,9606.ENSP00000277746,9606.ENSP00000310170,9606.ENSP00000312988,9606.ENSP00000325414,9606.ENSP00000337862,9606.ENSP00000338807,9606.ENSP00000344352,9606.ENSP00000345393,9606.ENSP00000350359,9606.ENSP00000350633,…	XBP1,PRDM4,EGR2,EREG,FOSB,BHLHE40,MXD1,CSRNP1,EAF2,NRBF2,FOSL1,NFKBIB,SERTAD3,OVOL1,ZBTB49,ATF3,MAFF,CREB5,SERTAD1,ZNF460,CTGF,PTBP2,JUN,YRDC,ZC3H12A,ZBTB43,TSPYL2,ZNF165,ZMYM5,TDG,ZNF527,NABP1,ESRP1,KLF6,THUMPD2,DDIT3,ZNF699,NR4A3
GO:0035690	cellular response to drug	8	310	0.57	0.0132	9606.ENSP00000272233,9606.ENSP00000307305,9606.ENSP00000356438,9606.ENSP00000360762,9606.ENSP00000362179,9606.ENSP00000366702,9606.ENSP00000368683,9606.ENSP00000481570	RHOB,DDIT4,PTGS2,ANKRD1,ZC3H12A,ERRFI1,EDN1,TNFAIP3
GO:0070059	intrinsic apoptotic signaling pathway in response to endoplasmic reticulum stress	3	31	1.15	0.0133	9606.ENSP00000200453,9606.ENSP00000216037,9606.ENSP00000448665	PPP1R15A,XBP1,DDIT3
GO:0032055	negative regulation of translation in response to stress	2	7	1.62	0.0134	9606.ENSP00000253063,9606.ENSP00000307235	SESN2,EIF2AK3
GO:2000347	positive regulation of hepatocyte proliferation	2	7	1.62	0.0134	9606.ENSP00000216037,9606.ENSP00000481570	XBP1,TNFAIP3
GO:1903524	positive regulation of blood circulation	4	70	0.92	0.0136	9606.ENSP00000356438,9606.ENSP00000356954,9606.ENSP00000368683,9606.ENSP00000380247	PTGS2,CTGF,EDN1,HRH1
GO:0051253	negative regulation of RNA metabolic process	19	1303	0.32	0.0138	9606.ENSP00000216037,9606.ENSP00000244869,9606.ENSP00000245919,9606.ENSP00000256495,9606.ENSP00000264444,9606.ENSP00000330074,9606.ENSP00000337862,9606.ENSP00000344352,9606.ENSP00000352119,9606.ENSP00000359216,9606.ENSP00000360266,9606.ENSP00000360762,9606.ENSP00000361458,9606.ENSP00000362179,9606.ENSP00000368683,9606.ENSP00000376611,9606.ENSP00000441543,9606.ENSP00000448665,9606.ENSP00000482027	XBP1,EREG,FOSB,BHLHE40,MXD1,HIST1H1B,OVOL1,ATF3,HIST1H2AG,PTBP2,JUN,ANKRD1,TSC22D3,ZC3H12A,EDN1,TDG,UBC,DDIT3,NR4A3
GO:0008630	intrinsic apoptotic signaling pathway in response to DNA damage	4	71	0.91	0.0142	9606.ENSP00000234420,9606.ENSP00000307305,9606.ENSP00000351209,9606.ENSP00000358022	MSH6,DDIT4,EPHA2,MCL1
GO:0060612	adipose tissue development	3	32	1.13	0.0142	9606.ENSP00000216037,9606.ENSP00000265138,9606.ENSP00000362159	XBP1,ARRDC3,SLC25A25
GO:0007519	skeletal muscle tissue development	5	122	0.77	0.0146	9606.ENSP00000242480,9606.ENSP00000344352,9606.ENSP00000345393,9606.ENSP00000360762,9606.ENSP00000368305	EGR2,ATF3,MAFF,ANKRD1,GPCPD1
GO:0006796	phosphate-containing compound metabolic process	26	2065	0.26	0.0152	9606.ENSP00000200453,9606.ENSP00000230990,9606.ENSP00000239223,9606.ENSP00000240100,9606.ENSP00000244869,9606.ENSP00000256458,9606.ENSP00000261845,9606.ENSP00000263056,9606.ENSP00000270162,9606.ENSP00000274289,9606.ENSP00000279488,9606.ENSP00000307235,9606.ENSP00000351209,9606.ENSP00000355866,9606.ENSP00000356438,9606.ENSP00000356832,9606.ENSP00000358596,9606.ENSP00000362159,9606.ENSP00000368305,…	PPP1R15A,HBEGF,DUSP1,DUSP4,EREG,IRAK2,MAPK6,MAP3K8,SIK1,PLK2,DUSP6,EIF2AK3,EPHA2,DUSP10,PTGS2,SGK1,DUSP5,SLC25A25,GPCPD1,XDH,PIGA,TDG,PDP1,PGM3,UBC,MAP3K14
GO:0014065	phosphatidylinositol 3-kinase signaling	3	33	1.12	0.0152	9606.ENSP00000216037,9606.ENSP00000344465,9606.ENSP00000368683	XBP1,PEAR1,EDN1
GO:1903362	regulation of cellular protein catabolic process	7	248	0.61	0.0152	9606.ENSP00000216037,9606.ENSP00000274289,9606.ENSP00000314619,9606.ENSP00000326813,9606.ENSP00000360690,9606.ENSP00000409555,9606.ENSP00000481570	XBP1,PLK2,ZFAND2A,YOD1,LONRF3,HERPUD1,TNFAIP3
GO:0060326	cell chemotaxis	6	183	0.68	0.0154	9606.ENSP00000230990,9606.ENSP00000296026,9606.ENSP00000306512,9606.ENSP00000351209,9606.ENSP00000380247,9606.ENSP00000427279	HBEGF,CXCL3,CXCL8,EPHA2,HRH1,CXCL2
GO:1901654	response to ketone	6	183	0.68	0.0154	9606.ENSP00000239223,9606.ENSP00000245919,9606.ENSP00000307305,9606.ENSP00000310170,9606.ENSP00000366702,9606.ENSP00000368683	DUSP1,FOSB,DDIT4,FOSL1,ERRFI1,EDN1
GO:0032879	regulation of localization	30	2524	0.24	0.0156	9606.ENSP00000167588,9606.ENSP00000216037,9606.ENSP00000230990,9606.ENSP00000244869,9606.ENSP00000253063,9606.ENSP00000263339,9606.ENSP00000264711,9606.ENSP00000270162,9606.ENSP00000272233,9606.ENSP00000274289,9606.ENSP00000296026,9606.ENSP00000306512,9606.ENSP00000307235,9606.ENSP00000326813,9606.ENSP00000344741,9606.ENSP00000351209,9606.ENSP00000355866,9606.ENSP00000356438,9606.ENSP00000356832,…	KRT20,XBP1,HBEGF,EREG,SESN2,IL1A,DNAJC27,SIK1,RHOB,PLK2,CXCL3,CXCL8,EIF2AK3,YOD1,INSIG1,EPHA2,DUSP10,PTGS2,SGK1,JUN,PARD6B,ANKRD1,YRDC,ZC3H12A,EDN1,VIMP,CYR61,CXCL2,DDIT3,NR4A3
GO:0044257	cellular protein catabolic process	11	562	0.45	0.0156	9606.ENSP00000216037,9606.ENSP00000249356,9606.ENSP00000326813,9606.ENSP00000331748,9606.ENSP00000381282,9606.ENSP00000409555,9606.ENSP00000441214,9606.ENSP00000441543,9606.ENSP00000448665,9606.ENSP00000473631,9606.ENSP00000481570	XBP1,DNAJB9,YOD1,RAB12,VIMP,HERPUD1,USP36,UBC,DDIT3,DNAJC3,TNFAIP3
GO:0009750	response to fructose	2	8	1.56	0.0158	9606.ENSP00000216037,9606.ENSP00000356438	XBP1,PTGS2
GO:0051409	response to nitrosative stress	2	8	1.56	0.0158	9606.ENSP00000279488,9606.ENSP00000448665	DUSP6,DDIT3
GO:0070417	cellular response to cold	2	8	1.56	0.0158	9606.ENSP00000307235,9606.ENSP00000473631	EIF2AK3,DNAJC3
GO:1903071	positive regulation of ER-associated ubiquitin-dependent protein catabolic process	2	8	1.56	0.0158	9606.ENSP00000216037,9606.ENSP00000409555	XBP1,HERPUD1
GO:0048008	platelet-derived growth factor receptor signaling pathway	3	34	1.11	0.0159	9606.ENSP00000273153,9606.ENSP00000420612,9606.ENSP00000482027	CSRNP1,TIPARP,NR4A3
GO:0061136	regulation of proteasomal protein catabolic process	6	185	0.67	0.0159	9606.ENSP00000216037,9606.ENSP00000274289,9606.ENSP00000314619,9606.ENSP00000326813,9606.ENSP00000360690,9606.ENSP00000409555	XBP1,PLK2,ZFAND2A,YOD1,LONRF3,HERPUD1
GO:0006954	inflammatory response	10	482	0.48	0.0162	9606.ENSP00000256458,9606.ENSP00000263339,9606.ENSP00000296026,9606.ENSP00000306512,9606.ENSP00000356438,9606.ENSP00000360266,9606.ENSP00000362179,9606.ENSP00000380247,9606.ENSP00000427279,9606.ENSP00000481570	IRAK2,IL1A,CXCL3,CXCL8,PTGS2,JUN,ZC3H12A,HRH1,CXCL2,TNFAIP3
GO:0043491	protein kinase B signaling	3	35	1.09	0.017	9606.ENSP00000253063,9606.ENSP00000344465,9606.ENSP00000351209	SESN2,PEAR1,EPHA2
GO:0006111	regulation of gluconeogenesis	3	36	1.08	0.0182	9606.ENSP00000253063,9606.ENSP00000270162,9606.ENSP00000381282	SESN2,SIK1,VIMP
GO:0006935	chemotaxis	10	491	0.47	0.0182	9606.ENSP00000230990,9606.ENSP00000242480,9606.ENSP00000296026,9606.ENSP00000306512,9606.ENSP00000310170,9606.ENSP00000351209,9606.ENSP00000380247,9606.ENSP00000398736,9606.ENSP00000427279,9606.ENSP00000482027	HBEGF,EGR2,CXCL3,CXCL8,FOSL1,EPHA2,HRH1,CYR61,CXCL2,NR4A3
GO:0071260	cellular response to mechanical stimulus	4	78	0.87	0.0184	9606.ENSP00000356438,9606.ENSP00000360025,9606.ENSP00000360762,9606.ENSP00000482657	PTGS2,GADD45A,ANKRD1,MAP3K14
GO:0006048	UDP-N-acetylglucosamine biosynthetic process	2	9	1.51	0.0186	9606.ENSP00000356903,9606.ENSP00000425809	UAP1,PGM3
GO:0036500	ATF6-mediated unfolded protein response	2	9	1.51	0.0186	9606.ENSP00000216037,9606.ENSP00000448665	XBP1,DDIT3
GO:0034645	cellular macromolecule biosynthetic process	38	3518	0.19	0.0188	9606.ENSP00000216037,9606.ENSP00000228437,9606.ENSP00000242480,9606.ENSP00000244869,9606.ENSP00000245919,9606.ENSP00000256495,9606.ENSP00000264444,9606.ENSP00000273153,9606.ENSP00000273668,9606.ENSP00000277746,9606.ENSP00000310170,9606.ENSP00000312021,9606.ENSP00000312988,9606.ENSP00000325414,9606.ENSP00000337862,9606.ENSP00000338807,9606.ENSP00000344352,9606.ENSP00000345393,9606.ENSP00000350359,…	XBP1,PRDM4,EGR2,EREG,FOSB,BHLHE40,MXD1,CSRNP1,EAF2,NRBF2,FOSL1,FUT1,NFKBIB,SERTAD3,OVOL1,ZBTB49,ATF3,MAFF,CREB5,SERTAD1,ZNF460,CTGF,JUN,ZC3H12A,ZBTB43,TSPYL2,ZNF165,PIGA,ZMYM5,TDG,ZNF527,NABP1,KLF6,PGM3,UBC,DDIT3,ZNF699,NR4A3
GO:0010675	regulation of cellular carbohydrate metabolic process	5	133	0.74	0.0196	9606.ENSP00000253063,9606.ENSP00000270162,9606.ENSP00000307305,9606.ENSP00000380247,9606.ENSP00000381282	SESN2,SIK1,DDIT4,HRH1,VIMP
GO:0097237	cellular response to toxic substance	6	195	0.65	0.0197	9606.ENSP00000253063,9606.ENSP00000272233,9606.ENSP00000356438,9606.ENSP00000362179,9606.ENSP00000381282,9606.ENSP00000481570	SESN2,RHOB,PTGS2,ZC3H12A,VIMP,TNFAIP3
GO:0032715	negative regulation of interleukin-6 production	3	38	1.06	0.0206	9606.ENSP00000362179,9606.ENSP00000381282,9606.ENSP00000481570	ZC3H12A,VIMP,TNFAIP3
GO:0071356	cellular response to tumor necrosis factor	6	197	0.64	0.0206	9606.ENSP00000306512,9606.ENSP00000326737,9606.ENSP00000360762,9606.ENSP00000362179,9606.ENSP00000368683,9606.ENSP00000482657	CXCL8,TNFRSF12A,ANKRD1,ZC3H12A,EDN1,MAP3K14
GO:0071548	response to dexamethasone	3	38	1.06	0.0206	9606.ENSP00000307305,9606.ENSP00000366702,9606.ENSP00000368683	DDIT4,ERRFI1,EDN1
GO:1990869	cellular response to chemokine	4	81	0.85	0.0206	9606.ENSP00000296026,9606.ENSP00000306512,9606.ENSP00000362179,9606.ENSP00000427279	CXCL3,CXCL8,ZC3H12A,CXCL2
GO:0022603	regulation of anatomical structure morphogenesis	15	961	0.35	0.0209	9606.ENSP00000216037,9606.ENSP00000252809,9606.ENSP00000263339,9606.ENSP00000272233,9606.ENSP00000274289,9606.ENSP00000279488,9606.ENSP00000306512,9606.ENSP00000326737,9606.ENSP00000351209,9606.ENSP00000356438,9606.ENSP00000362179,9606.ENSP00000368683,9606.ENSP00000368727,9606.ENSP00000372361,9606.ENSP00000481570	XBP1,GDF15,IL1A,RHOB,PLK2,DUSP6,CXCL8,TNFRSF12A,EPHA2,PTGS2,ZC3H12A,EDN1,XDH,ZMYM5,TNFAIP3
GO:0070542	response to fatty acid	4	82	0.85	0.0212	9606.ENSP00000356438,9606.ENSP00000356954,9606.ENSP00000362179,9606.ENSP00000368683	PTGS2,CTGF,ZC3H12A,EDN1
GO:0071407	cellular response to organic cyclic compound	10	505	0.46	0.0213	9606.ENSP00000307305,9606.ENSP00000344741,9606.ENSP00000356438,9606.ENSP00000360762,9606.ENSP00000362179,9606.ENSP00000366702,9606.ENSP00000368683,9606.ENSP00000380247,9606.ENSP00000420612,9606.ENSP00000482027	DDIT4,INSIG1,PTGS2,ANKRD1,ZC3H12A,ERRFI1,EDN1,HRH1,TIPARP,NR4A3
GO:0035871	protein K11-linked deubiquitination	2	10	1.46	0.0214	9606.ENSP00000326813,9606.ENSP00000481570	YOD1,TNFAIP3
GO:0061469	regulation of type B pancreatic cell proliferation	2	10	1.46	0.0214	9606.ENSP00000366702,9606.ENSP00000482027	ERRFI1,NR4A3
GO:0070862	negative regulation of protein exit from endoplasmic reticulum	2	10	1.46	0.0214	9606.ENSP00000326813,9606.ENSP00000344741	YOD1,INSIG1
GO:0043255	regulation of carbohydrate biosynthetic process	4	83	0.84	0.0218	9606.ENSP00000253063,9606.ENSP00000270162,9606.ENSP00000380247,9606.ENSP00000381282	SESN2,SIK1,HRH1,VIMP
GO:0009746	response to hexose	5	138	0.72	0.022	9606.ENSP00000216037,9606.ENSP00000253063,9606.ENSP00000356438,9606.ENSP00000356954,9606.ENSP00000381282	XBP1,SESN2,PTGS2,CTGF,VIMP
GO:0033157	regulation of intracellular protein transport	6	201	0.64	0.022	9606.ENSP00000216037,9606.ENSP00000264711,9606.ENSP00000326813,9606.ENSP00000344741,9606.ENSP00000356438,9606.ENSP00000362179	XBP1,DNAJC27,YOD1,INSIG1,PTGS2,ZC3H12A
GO:0045595	regulation of cell differentiation	22	1695	0.27	0.022	9606.ENSP00000216037,9606.ENSP00000244869,9606.ENSP00000252809,9606.ENSP00000261845,9606.ENSP00000270162,9606.ENSP00000274289,9606.ENSP00000279488,9606.ENSP00000326737,9606.ENSP00000344741,9606.ENSP00000345393,9606.ENSP00000355866,9606.ENSP00000356438,9606.ENSP00000356954,9606.ENSP00000360266,9606.ENSP00000360762,9606.ENSP00000362179,9606.ENSP00000366702,9606.ENSP00000368683,9606.ENSP00000368727,…	XBP1,EREG,GDF15,MAPK6,SIK1,PLK2,DUSP6,TNFRSF12A,INSIG1,MAFF,DUSP10,PTGS2,CTGF,JUN,ANKRD1,ZC3H12A,ERRFI1,EDN1,XDH,CYR61,DDIT3,NR4A3
GO:0045892	negative regulation of transcription, DNA-templated	17	1169	0.32	0.022	9606.ENSP00000216037,9606.ENSP00000244869,9606.ENSP00000245919,9606.ENSP00000256495,9606.ENSP00000264444,9606.ENSP00000330074,9606.ENSP00000337862,9606.ENSP00000344352,9606.ENSP00000352119,9606.ENSP00000360266,9606.ENSP00000360762,9606.ENSP00000361458,9606.ENSP00000368683,9606.ENSP00000376611,9606.ENSP00000441543,9606.ENSP00000448665,9606.ENSP00000482027	XBP1,EREG,FOSB,BHLHE40,MXD1,HIST1H1B,OVOL1,ATF3,HIST1H2AG,JUN,ANKRD1,TSC22D3,EDN1,TDG,UBC,DDIT3,NR4A3
GO:0046683	response to organophosphorus	5	138	0.72	0.022	9606.ENSP00000239223,9606.ENSP00000245919,9606.ENSP00000310170,9606.ENSP00000356438,9606.ENSP00000360266	DUSP1,FOSB,FOSL1,PTGS2,JUN
GO:0032147	activation of protein kinase activity	8	347	0.52	0.0223	9606.ENSP00000252809,9606.ENSP00000256458,9606.ENSP00000263056,9606.ENSP00000279488,9606.ENSP00000358596,9606.ENSP00000360025,9606.ENSP00000441543,9606.ENSP00000482657	GDF15,IRAK2,MAP3K8,DUSP6,DUSP5,GADD45A,UBC,MAP3K14
GO:0071560	cellular response to transforming growth factor beta stimulus	5	140	0.71	0.0231	9606.ENSP00000252809,9606.ENSP00000360266,9606.ENSP00000360762,9606.ENSP00000368683,9606.ENSP00000441543	GDF15,JUN,ANKRD1,EDN1,UBC
GO:0036503	ERAD pathway	4	85	0.83	0.0232	9606.ENSP00000249356,9606.ENSP00000326813,9606.ENSP00000381282,9606.ENSP00000409555	DNAJB9,YOD1,VIMP,HERPUD1
GO:1901216	positive regulation of neuron death	4	85	0.83	0.0232	9606.ENSP00000307305,9606.ENSP00000358022,9606.ENSP00000360266,9606.ENSP00000448665	DDIT4,MCL1,JUN,DDIT3
GO:0044057	regulation of system process	10	516	0.45	0.0238	9606.ENSP00000230990,9606.ENSP00000307235,9606.ENSP00000356438,9606.ENSP00000356832,9606.ENSP00000356954,9606.ENSP00000362179,9606.ENSP00000366702,9606.ENSP00000368683,9606.ENSP00000380247,9606.ENSP00000482027	HBEGF,EIF2AK3,PTGS2,SGK1,CTGF,ZC3H12A,ERRFI1,EDN1,HRH1,NR4A3
GO:0051898	negative regulation of protein kinase B signaling	3	41	1.03	0.0238	9606.ENSP00000351209,9606.ENSP00000368727,9606.ENSP00000448665	EPHA2,XDH,DDIT3
GO:0000079	regulation of cyclin-dependent protein serine/threonine kinase activity	4	86	0.83	0.0239	9606.ENSP00000342344,9606.ENSP00000350633,9606.ENSP00000360025,9606.ENSP00000481570	CCNYL1,SERTAD1,GADD45A,TNFAIP3
GO:0019217	regulation of fatty acid metabolic process	4	86	0.83	0.0239	9606.ENSP00000344741,9606.ENSP00000356438,9606.ENSP00000379503,9606.ENSP00000482027	INSIG1,PTGS2,PDP1,NR4A3
GO:0031953	negative regulation of protein autophosphorylation	2	11	1.42	0.024	9606.ENSP00000360266,9606.ENSP00000366702	JUN,ERRFI1
GO:0051094	positive regulation of developmental process	18	1286	0.31	0.0241	9606.ENSP00000216037,9606.ENSP00000234420,9606.ENSP00000252809,9606.ENSP00000261845,9606.ENSP00000263339,9606.ENSP00000272233,9606.ENSP00000274289,9606.ENSP00000306512,9606.ENSP00000326737,9606.ENSP00000355866,9606.ENSP00000356438,9606.ENSP00000356954,9606.ENSP00000360266,9606.ENSP00000360762,9606.ENSP00000362179,9606.ENSP00000368683,9606.ENSP00000398736,9606.ENSP00000481570	XBP1,MSH6,GDF15,MAPK6,IL1A,RHOB,PLK2,CXCL8,TNFRSF12A,DUSP10,PTGS2,CTGF,JUN,ANKRD1,ZC3H12A,EDN1,CYR61,TNFAIP3
GO:0097327	response to antineoplastic agent	4	87	0.82	0.0245	9606.ENSP00000307305,9606.ENSP00000362179,9606.ENSP00000366702,9606.ENSP00000368683	DDIT4,ZC3H12A,ERRFI1,EDN1
GO:0007346	regulation of mitotic cell cycle	11	608	0.42	0.0247	9606.ENSP00000239223,9606.ENSP00000244869,9606.ENSP00000263056,9606.ENSP00000263339,9606.ENSP00000270162,9606.ENSP00000274289,9606.ENSP00000337862,9606.ENSP00000360025,9606.ENSP00000368683,9606.ENSP00000403683,9606.ENSP00000482657	DUSP1,EREG,MAP3K8,IL1A,SIK1,PLK2,OVOL1,GADD45A,EDN1,NABP1,MAP3K14
GO:0032872	regulation of stress-activated MAPK cascade	6	208	0.62	0.0247	9606.ENSP00000355866,9606.ENSP00000356954,9606.ENSP00000360025,9606.ENSP00000362179,9606.ENSP00000368683,9606.ENSP00000368727	DUSP10,CTGF,GADD45A,ZC3H12A,EDN1,XDH
GO:0042307	positive regulation of protein import into nucleus	3	42	1.02	0.0248	9606.ENSP00000216037,9606.ENSP00000356438,9606.ENSP00000362179	XBP1,PTGS2,ZC3H12A
GO:0022402	cell cycle process	14	890	0.36	0.0251	9606.ENSP00000200453,9606.ENSP00000234420,9606.ENSP00000239223,9606.ENSP00000244869,9606.ENSP00000272233,9606.ENSP00000274289,9606.ENSP00000306512,9606.ENSP00000337862,9606.ENSP00000338807,9606.ENSP00000349547,9606.ENSP00000360025,9606.ENSP00000403683,9606.ENSP00000448665,9606.ENSP00000484532	PPP1R15A,MSH6,DUSP1,EREG,RHOB,PLK2,CXCL8,OVOL1,ZBTB49,RASSF1,GADD45A,NABP1,DDIT3,MIS12
GO:0043281	regulation of cysteine-type endopeptidase activity involved in apoptotic process	6	209	0.62	0.0251	9606.ENSP00000307235,9606.ENSP00000356438,9606.ENSP00000356954,9606.ENSP00000368727,9606.ENSP00000398736,9606.ENSP00000409555	EIF2AK3,PTGS2,CTGF,XDH,CYR61,HERPUD1
GO:0030282	bone mineralization	3	43	1	0.0261	9606.ENSP00000307235,9606.ENSP00000356438,9606.ENSP00000357842	EIF2AK3,PTGS2,TUFT1
GO:0001817	regulation of cytokine production	11	615	0.41	0.0264	9606.ENSP00000216037,9606.ENSP00000244869,9606.ENSP00000263339,9606.ENSP00000307235,9606.ENSP00000356438,9606.ENSP00000362179,9606.ENSP00000366702,9606.ENSP00000381282,9606.ENSP00000448665,9606.ENSP00000481570,9606.ENSP00000482027	XBP1,EREG,IL1A,EIF2AK3,PTGS2,ZC3H12A,ERRFI1,VIMP,DDIT3,TNFAIP3,NR4A3
GO:0060537	muscle tissue development	7	284	0.55	0.0267	9606.ENSP00000242480,9606.ENSP00000270162,9606.ENSP00000344352,9606.ENSP00000345393,9606.ENSP00000360762,9606.ENSP00000368305,9606.ENSP00000420612	EGR2,SIK1,ATF3,MAFF,ANKRD1,GPCPD1,TIPARP
GO:0032874	positive regulation of stress-activated MAPK cascade	5	148	0.69	0.0273	9606.ENSP00000356954,9606.ENSP00000360025,9606.ENSP00000362179,9606.ENSP00000368683,9606.ENSP00000368727	CTGF,GADD45A,ZC3H12A,EDN1,XDH
GO:0051147	regulation of muscle cell differentiation	5	148	0.69	0.0273	9606.ENSP00000216037,9606.ENSP00000244869,9606.ENSP00000252809,9606.ENSP00000270162,9606.ENSP00000368683	XBP1,EREG,GDF15,SIK1,EDN1
GO:0010506	regulation of autophagy	7	286	0.55	0.0274	9606.ENSP00000216037,9606.ENSP00000253063,9606.ENSP00000274289,9606.ENSP00000331748,9606.ENSP00000358022,9606.ENSP00000362179,9606.ENSP00000441214	XBP1,SESN2,PLK2,RAB12,MCL1,ZC3H12A,USP36
GO:0000187	activation of MAPK activity	5	149	0.69	0.0278	9606.ENSP00000252809,9606.ENSP00000256458,9606.ENSP00000279488,9606.ENSP00000358596,9606.ENSP00000441543	GDF15,IRAK2,DUSP6,DUSP5,UBC
GO:0001503	ossification	6	215	0.61	0.0278	9606.ENSP00000307235,9606.ENSP00000351209,9606.ENSP00000356438,9606.ENSP00000356954,9606.ENSP00000357842,9606.ENSP00000398736	EIF2AK3,EPHA2,PTGS2,CTGF,TUFT1,CYR61
GO:0007517	muscle organ development	7	287	0.55	0.0278	9606.ENSP00000216037,9606.ENSP00000230990,9606.ENSP00000242480,9606.ENSP00000344352,9606.ENSP00000345393,9606.ENSP00000360762,9606.ENSP00000368305	XBP1,HBEGF,EGR2,ATF3,MAFF,ANKRD1,GPCPD1
GO:0051603	proteolysis involved in cellular protein catabolic process	10	532	0.44	0.0278	9606.ENSP00000216037,9606.ENSP00000249356,9606.ENSP00000326813,9606.ENSP00000381282,9606.ENSP00000409555,9606.ENSP00000441214,9606.ENSP00000441543,9606.ENSP00000448665,9606.ENSP00000473631,9606.ENSP00000481570	XBP1,DNAJB9,YOD1,VIMP,HERPUD1,USP36,UBC,DDIT3,DNAJC3,TNFAIP3
GO:0034198	cellular response to amino acid starvation	3	45	0.99	0.0284	9606.ENSP00000253063,9606.ENSP00000307235,9606.ENSP00000344352	SESN2,EIF2AK3,ATF3
GO:0014074	response to purine-containing compound	5	151	0.68	0.0288	9606.ENSP00000239223,9606.ENSP00000245919,9606.ENSP00000310170,9606.ENSP00000356438,9606.ENSP00000360266	DUSP1,FOSB,FOSL1,PTGS2,JUN
GO:0042176	regulation of protein catabolic process	8	368	0.5	0.0288	9606.ENSP00000216037,9606.ENSP00000274289,9606.ENSP00000314619,9606.ENSP00000326813,9606.ENSP00000360690,9606.ENSP00000409555,9606.ENSP00000420612,9606.ENSP00000481570	XBP1,PLK2,ZFAND2A,YOD1,LONRF3,HERPUD1,TIPARP,TNFAIP3
GO:0010677	negative regulation of cellular carbohydrate metabolic process	3	46	0.98	0.0298	9606.ENSP00000270162,9606.ENSP00000307305,9606.ENSP00000381282	SIK1,DDIT4,VIMP
GO:0031650	regulation of heat generation	2	13	1.35	0.0298	9606.ENSP00000265138,9606.ENSP00000356438	ARRDC3,PTGS2
GO:1903894	regulation of IRE1-mediated unfolded protein response	2	13	1.35	0.0298	9606.ENSP00000249356,9606.ENSP00000446479	DNAJB9,FICD
GO:1903320	regulation of protein modification by small protein conjugation or removal	6	220	0.6	0.0302	9606.ENSP00000265138,9606.ENSP00000349547,9606.ENSP00000362179,9606.ENSP00000409555,9606.ENSP00000417706,9606.ENSP00000481570	ARRDC3,RASSF1,ZC3H12A,HERPUD1,DCUN1D2,TNFAIP3
GO:0045933	positive regulation of muscle contraction	3	47	0.97	0.0311	9606.ENSP00000356438,9606.ENSP00000356954,9606.ENSP00000368683	PTGS2,CTGF,EDN1
GO:0051153	regulation of striated muscle cell differentiation	4	96	0.78	0.0316	9606.ENSP00000216037,9606.ENSP00000252809,9606.ENSP00000270162,9606.ENSP00000368683	XBP1,GDF15,SIK1,EDN1
GO:0006468	protein phosphorylation	14	923	0.34	0.0319	9606.ENSP00000230990,9606.ENSP00000244869,9606.ENSP00000256458,9606.ENSP00000261845,9606.ENSP00000263056,9606.ENSP00000270162,9606.ENSP00000274289,9606.ENSP00000279488,9606.ENSP00000307235,9606.ENSP00000351209,9606.ENSP00000356832,9606.ENSP00000358596,9606.ENSP00000441543,9606.ENSP00000482657	HBEGF,EREG,IRAK2,MAPK6,MAP3K8,SIK1,PLK2,DUSP6,EIF2AK3,EPHA2,SGK1,DUSP5,UBC,MAP3K14
GO:0090257	regulation of muscle system process	6	224	0.59	0.0323	9606.ENSP00000356438,9606.ENSP00000356954,9606.ENSP00000362179,9606.ENSP00000366702,9606.ENSP00000368683,9606.ENSP00000482027	PTGS2,CTGF,ZC3H12A,ERRFI1,EDN1,NR4A3
GO:0006511	ubiquitin-dependent protein catabolic process	9	461	0.45	0.0324	9606.ENSP00000216037,9606.ENSP00000249356,9606.ENSP00000326813,9606.ENSP00000381282,9606.ENSP00000409555,9606.ENSP00000441214,9606.ENSP00000441543,9606.ENSP00000448665,9606.ENSP00000481570	XBP1,DNAJB9,YOD1,VIMP,HERPUD1,USP36,UBC,DDIT3,TNFAIP3
GO:0071850	mitotic cell cycle arrest	2	14	1.32	0.0331	9606.ENSP00000239223,9606.ENSP00000360025	DUSP1,GADD45A
GO:0051591	response to cAMP	4	98	0.77	0.0334	9606.ENSP00000239223,9606.ENSP00000245919,9606.ENSP00000310170,9606.ENSP00000360266	DUSP1,FOSB,FOSL1,JUN
GO:2001236	regulation of extrinsic apoptotic signaling pathway	5	158	0.66	0.0334	9606.ENSP00000263339,9606.ENSP00000326737,9606.ENSP00000344352,9606.ENSP00000358022,9606.ENSP00000481570	IL1A,TNFRSF12A,ATF3,MCL1,TNFAIP3
GO:0043525	positive regulation of neuron apoptotic process	3	49	0.95	0.0337	9606.ENSP00000358022,9606.ENSP00000360266,9606.ENSP00000448665	MCL1,JUN,DDIT3
GO:1903827	regulation of cellular protein localization	9	465	0.45	0.0337	9606.ENSP00000216037,9606.ENSP00000253063,9606.ENSP00000264711,9606.ENSP00000307235,9606.ENSP00000326813,9606.ENSP00000344741,9606.ENSP00000351209,9606.ENSP00000356438,9606.ENSP00000362179	XBP1,SESN2,DNAJC27,EIF2AK3,YOD1,INSIG1,EPHA2,PTGS2,ZC3H12A
GO:0030307	positive regulation of cell growth	5	159	0.66	0.0338	9606.ENSP00000230990,9606.ENSP00000326737,9606.ENSP00000330074,9606.ENSP00000368683,9606.ENSP00000427108	HBEGF,TNFRSF12A,HIST1H1B,EDN1,CDKN2AIP
GO:0030162	regulation of proteolysis	12	742	0.37	0.0351	9606.ENSP00000216037,9606.ENSP00000274289,9606.ENSP00000307235,9606.ENSP00000314619,9606.ENSP00000326813,9606.ENSP00000356438,9606.ENSP00000356954,9606.ENSP00000360690,9606.ENSP00000362179,9606.ENSP00000368727,9606.ENSP00000398736,9606.ENSP00000409555	XBP1,PLK2,EIF2AK3,ZFAND2A,YOD1,PTGS2,CTGF,LONRF3,ZC3H12A,XDH,CYR61,HERPUD1
GO:0071248	cellular response to metal ion	5	162	0.65	0.0361	9606.ENSP00000245919,9606.ENSP00000307235,9606.ENSP00000356438,9606.ENSP00000360266,9606.ENSP00000368683	FOSB,EIF2AK3,PTGS2,JUN,EDN1
GO:0043200	response to amino acid	4	103	0.75	0.0384	9606.ENSP00000216037,9606.ENSP00000253063,9606.ENSP00000356954,9606.ENSP00000368683	XBP1,SESN2,CTGF,EDN1
GO:0001706	endoderm formation	3	52	0.92	0.0387	9606.ENSP00000239223,9606.ENSP00000240100,9606.ENSP00000358596	DUSP1,DUSP4,DUSP5
GO:0007567	parturition	2	16	1.26	0.0401	9606.ENSP00000345393,9606.ENSP00000368683	MAFF,EDN1
GO:0010042	response to manganese ion	2	16	1.26	0.0401	9606.ENSP00000307235,9606.ENSP00000356438	EIF2AK3,PTGS2
GO:0030970	retrograde protein transport, ER to cytosol	2	16	1.26	0.0401	9606.ENSP00000381282,9606.ENSP00000409555	VIMP,HERPUD1
GO:0051447	negative regulation of meiotic cell cycle	2	16	1.26	0.0401	9606.ENSP00000239223,9606.ENSP00000337862	DUSP1,OVOL1
GO:0090335	regulation of brown fat cell differentiation	2	16	1.26	0.0401	9606.ENSP00000355866,9606.ENSP00000356438	DUSP10,PTGS2
GO:1904754	positive regulation of vascular associated smooth muscle cell migration	2	16	1.26	0.0401	9606.ENSP00000216037,9606.ENSP00000482027	XBP1,NR4A3
GO:0010467	gene expression	38	3733	0.17	0.0416	9606.ENSP00000216037,9606.ENSP00000228437,9606.ENSP00000242480,9606.ENSP00000244869,9606.ENSP00000245919,9606.ENSP00000256495,9606.ENSP00000264444,9606.ENSP00000273153,9606.ENSP00000273668,9606.ENSP00000277746,9606.ENSP00000310170,9606.ENSP00000312988,9606.ENSP00000325414,9606.ENSP00000337862,9606.ENSP00000338807,9606.ENSP00000344352,9606.ENSP00000345393,9606.ENSP00000350359,9606.ENSP00000350633,…	XBP1,PRDM4,EGR2,EREG,FOSB,BHLHE40,MXD1,CSRNP1,EAF2,NRBF2,FOSL1,NFKBIB,SERTAD3,OVOL1,ZBTB49,ATF3,MAFF,CREB5,SERTAD1,ZNF460,CTGF,PTBP2,JUN,YRDC,ZC3H12A,ZBTB43,TSPYL2,ZNF165,ZMYM5,TDG,ZNF527,NABP1,ESRP1,KLF6,THUMPD2,DDIT3,ZNF699,NR4A3
GO:0010611	regulation of cardiac muscle hypertrophy	3	54	0.91	0.0418	9606.ENSP00000366702,9606.ENSP00000368683,9606.ENSP00000482027	ERRFI1,EDN1,NR4A3
GO:0045428	regulation of nitric oxide biosynthetic process	3	54	0.91	0.0418	9606.ENSP00000356438,9606.ENSP00000362179,9606.ENSP00000368683	PTGS2,ZC3H12A,EDN1
GO:0045840	positive regulation of mitotic nuclear division	3	54	0.91	0.0418	9606.ENSP00000244869,9606.ENSP00000263339,9606.ENSP00000368683	EREG,IL1A,EDN1
GO:0051704	multi-organism process	28	2514	0.21	0.0418	9606.ENSP00000216037,9606.ENSP00000227752,9606.ENSP00000234420,9606.ENSP00000244869,9606.ENSP00000245919,9606.ENSP00000256458,9606.ENSP00000296026,9606.ENSP00000306512,9606.ENSP00000307305,9606.ENSP00000310170,9606.ENSP00000312988,9606.ENSP00000331748,9606.ENSP00000337862,9606.ENSP00000345393,9606.ENSP00000351209,9606.ENSP00000355866,9606.ENSP00000356438,9606.ENSP00000360266,9606.ENSP00000360762,…	XBP1,IL10RA,MSH6,EREG,FOSB,IRAK2,CXCL3,CXCL8,DDIT4,FOSL1,NFKBIB,RAB12,OVOL1,MAFF,EPHA2,DUSP10,PTGS2,JUN,ANKRD1,ZC3H12A,EDN1,VIMP,PGM3,CXCL2,UBC,DNAJC3,TNFAIP3,MAP3K14
GO:0009887	animal organ morphogenesis	13	865	0.34	0.0433	9606.ENSP00000244869,9606.ENSP00000273153,9606.ENSP00000344741,9606.ENSP00000351209,9606.ENSP00000356954,9606.ENSP00000357842,9606.ENSP00000360266,9606.ENSP00000360762,9606.ENSP00000366702,9606.ENSP00000368683,9606.ENSP00000398736,9606.ENSP00000420612,9606.ENSP00000482027	EREG,CSRNP1,INSIG1,EPHA2,CTGF,TUFT1,JUN,ANKRD1,ERRFI1,EDN1,CYR61,TIPARP,NR4A3
GO:0010830	regulation of myotube differentiation	3	55	0.9	0.0435	9606.ENSP00000216037,9606.ENSP00000252809,9606.ENSP00000270162	XBP1,GDF15,SIK1
GO:0071385	cellular response to glucocorticoid stimulus	3	55	0.9	0.0435	9606.ENSP00000307305,9606.ENSP00000366702,9606.ENSP00000368683	DDIT4,ERRFI1,EDN1
GO:0007613	memory	4	109	0.73	0.0448	9606.ENSP00000274289,9606.ENSP00000356438,9606.ENSP00000356832,9606.ENSP00000380247	PLK2,PTGS2,SGK1,HRH1
GO:0002682	regulation of immune system process	18	1391	0.27	0.0449	9606.ENSP00000216037,9606.ENSP00000234420,9606.ENSP00000244869,9606.ENSP00000256458,9606.ENSP00000263056,9606.ENSP00000263339,9606.ENSP00000296026,9606.ENSP00000306512,9606.ENSP00000355866,9606.ENSP00000360266,9606.ENSP00000361458,9606.ENSP00000362179,9606.ENSP00000368683,9606.ENSP00000381282,9606.ENSP00000427279,9606.ENSP00000441543,9606.ENSP00000481570,9606.ENSP00000482027	XBP1,MSH6,EREG,IRAK2,MAP3K8,IL1A,CXCL3,CXCL8,DUSP10,JUN,TSC22D3,ZC3H12A,EDN1,VIMP,CXCL2,UBC,TNFAIP3,NR4A3
GO:0008283	cell population proliferation	11	676	0.37	0.045	9606.ENSP00000216037,9606.ENSP00000228437,9606.ENSP00000244869,9606.ENSP00000263339,9606.ENSP00000264444,9606.ENSP00000307305,9606.ENSP00000344741,9606.ENSP00000351209,9606.ENSP00000356954,9606.ENSP00000398736,9606.ENSP00000482027	XBP1,PRDM4,EREG,IL1A,MXD1,DDIT4,INSIG1,EPHA2,CTGF,CYR61,NR4A3
GO:0001101	response to acid chemical	7	323	0.5	0.0451	9606.ENSP00000216037,9606.ENSP00000239223,9606.ENSP00000253063,9606.ENSP00000356438,9606.ENSP00000356954,9606.ENSP00000362179,9606.ENSP00000368683	XBP1,DUSP1,SESN2,PTGS2,CTGF,ZC3H12A,EDN1
GO:0046890	regulation of lipid biosynthetic process	5	174	0.62	0.0456	9606.ENSP00000216037,9606.ENSP00000270162,9606.ENSP00000344741,9606.ENSP00000356438,9606.ENSP00000398736	XBP1,SIK1,INSIG1,PTGS2,CYR61
GO:0032870	cellular response to hormone stimulus	10	585	0.39	0.0459	9606.ENSP00000216037,9606.ENSP00000239223,9606.ENSP00000245919,9606.ENSP00000270162,9606.ENSP00000307305,9606.ENSP00000360266,9606.ENSP00000366702,9606.ENSP00000368683,9606.ENSP00000381282,9606.ENSP00000482027	XBP1,DUSP1,FOSB,SIK1,DDIT4,JUN,ERRFI1,EDN1,VIMP,NR4A3
GO:2000242	negative regulation of reproductive process	3	57	0.88	0.0468	9606.ENSP00000239223,9606.ENSP00000273668,9606.ENSP00000337862	DUSP1,EAF2,OVOL1
GO:0001516	prostaglandin biosynthetic process	2	18	1.21	0.0471	9606.ENSP00000356438,9606.ENSP00000368683	PTGS2,EDN1
GO:0051412	response to corticosterone	2	18	1.21	0.0471	9606.ENSP00000245919,9606.ENSP00000310170	FOSB,FOSL1
GO:0008284	positive regulation of cell population proliferation	13	878	0.33	0.0472	9606.ENSP00000216037,9606.ENSP00000230990,9606.ENSP00000244869,9606.ENSP00000310170,9606.ENSP00000344352,9606.ENSP00000350633,9606.ENSP00000356438,9606.ENSP00000356954,9606.ENSP00000360266,9606.ENSP00000368683,9606.ENSP00000398736,9606.ENSP00000481570,9606.ENSP00000482027	XBP1,HBEGF,EREG,FOSL1,ATF3,SERTAD1,PTGS2,CTGF,JUN,EDN1,CYR61,TNFAIP3,NR4A3
GO:1903522	regulation of blood circulation	6	249	0.54	0.0476	9606.ENSP00000230990,9606.ENSP00000356438,9606.ENSP00000356954,9606.ENSP00000362179,9606.ENSP00000368683,9606.ENSP00000380247	HBEGF,PTGS2,CTGF,ZC3H12A,EDN1,HRH1
GO:0032103	positive regulation of response to external stimulus	9	499	0.42	0.0477	9606.ENSP00000244869,9606.ENSP00000256458,9606.ENSP00000296026,9606.ENSP00000306512,9606.ENSP00000356438,9606.ENSP00000368683,9606.ENSP00000427279,9606.ENSP00000441543,9606.ENSP00000481570	EREG,IRAK2,CXCL3,CXCL8,PTGS2,EDN1,CXCL2,UBC,TNFAIP3
GO:0046822	regulation of nucleocytoplasmic transport	4	113	0.71	0.0488	9606.ENSP00000216037,9606.ENSP00000264711,9606.ENSP00000356438,9606.ENSP00000362179	XBP1,DNAJC27,PTGS2,ZC3H12A

## Sheet: Cntrl_vs_Coinfection_24h_KEGG
Supplementary table S8: Results from the Gene Ontology (GO) analysis in the category for biological process complete (GObp) and Pathway Enrichment (KEGG pathways) in co-infected cells at 24 hpi.
#term ID	term description	observed gene count	background gene count	strength	false discovery rate	matching proteins in your network (IDs)	matching proteins in your network (labels)
hsa04657	IL-17 signaling pathway	9	92	1.15	4.62e-06	9606.ENSP00000245919,9606.ENSP00000261845,9606.ENSP00000296026,9606.ENSP00000306512,9606.ENSP00000310170,9606.ENSP00000356438,9606.ENSP00000360266,9606.ENSP00000427279,9606.ENSP00000481570	FOSB,MAPK6,CXCL3,CXCL8,FOSL1,PTGS2,JUN,CXCL2,TNFAIP3
hsa04668	TNF signaling pathway	9	108	1.08	8.33e-06	9606.ENSP00000263056,9606.ENSP00000296026,9606.ENSP00000350359,9606.ENSP00000356438,9606.ENSP00000360266,9606.ENSP00000368683,9606.ENSP00000427279,9606.ENSP00000481570,9606.ENSP00000482657	MAP3K8,CXCL3,CREB5,PTGS2,JUN,EDN1,CXCL2,TNFAIP3,MAP3K14
hsa04010	MAPK signaling pathway	13	293	0.81	9.41e-06	9606.ENSP00000239223,9606.ENSP00000240100,9606.ENSP00000244869,9606.ENSP00000263056,9606.ENSP00000263339,9606.ENSP00000279488,9606.ENSP00000351209,9606.ENSP00000355866,9606.ENSP00000358596,9606.ENSP00000360025,9606.ENSP00000360266,9606.ENSP00000448665,9606.ENSP00000482657	DUSP1,DUSP4,EREG,MAP3K8,IL1A,DUSP6,EPHA2,DUSP10,DUSP5,GADD45A,JUN,DDIT3,MAP3K14
hsa04141	Protein processing in endoplasmic reticulum	9	161	0.91	9.79e-05	9606.ENSP00000200453,9606.ENSP00000216037,9606.ENSP00000280551,9606.ENSP00000307235,9606.ENSP00000326813,9606.ENSP00000381282,9606.ENSP00000409555,9606.ENSP00000448665,9606.ENSP00000473631	PPP1R15A,XBP1,SEC24D,EIF2AK3,YOD1,VIMP,HERPUD1,DDIT3,DNAJC3
hsa04210	Apoptosis	6	135	0.81	0.0109	9606.ENSP00000307235,9606.ENSP00000358022,9606.ENSP00000360025,9606.ENSP00000360266,9606.ENSP00000448665,9606.ENSP00000482657	EIF2AK3,MCL1,GADD45A,JUN,DDIT3,MAP3K14
hsa05132	Salmonella infection	5	84	0.94	0.0109	9606.ENSP00000263339,9606.ENSP00000296026,9606.ENSP00000306512,9606.ENSP00000360266,9606.ENSP00000427279	IL1A,CXCL3,CXCL8,JUN,CXCL2
hsa04064	NF-kappa B signaling pathway	5	93	0.89	0.0121	9606.ENSP00000306512,9606.ENSP00000356438,9606.ENSP00000427279,9606.ENSP00000481570,9606.ENSP00000482657	CXCL8,PTGS2,CXCL2,TNFAIP3,MAP3K14
hsa04932	Non-alcoholic fatty liver disease (NAFLD)	6	149	0.77	0.013	9606.ENSP00000216037,9606.ENSP00000263339,9606.ENSP00000306512,9606.ENSP00000307235,9606.ENSP00000360266,9606.ENSP00000448665	XBP1,IL1A,CXCL8,EIF2AK3,JUN,DDIT3
hsa04621	NOD-like receptor signaling pathway	6	166	0.72	0.0198	9606.ENSP00000296026,9606.ENSP00000306512,9606.ENSP00000312988,9606.ENSP00000360266,9606.ENSP00000427279,9606.ENSP00000481570	CXCL3,CXCL8,NFKBIB,JUN,CXCL2,TNFAIP3
hsa05120	Epithelial cell signaling in Helicobacter pylori infection	4	66	0.94	0.0198	9606.ENSP00000230990,9606.ENSP00000306512,9606.ENSP00000360266,9606.ENSP00000482657	HBEGF,CXCL8,JUN,MAP3K14
hsa05164	Influenza A	6	168	0.71	0.0198	9606.ENSP00000263339,9606.ENSP00000306512,9606.ENSP00000307235,9606.ENSP00000312988,9606.ENSP00000360266,9606.ENSP00000473631	IL1A,CXCL8,EIF2AK3,NFKBIB,JUN,DNAJC3
hsa05140	Leishmaniasis	4	70	0.92	0.0207	9606.ENSP00000263339,9606.ENSP00000312988,9606.ENSP00000356438,9606.ENSP00000360266	IL1A,NFKBIB,PTGS2,JUN
hsa04380	Osteoclast differentiation	5	124	0.77	0.0223	9606.ENSP00000245919,9606.ENSP00000263339,9606.ENSP00000310170,9606.ENSP00000360266,9606.ENSP00000482657	FOSB,IL1A,FOSL1,JUN,MAP3K14
hsa05169	Epstein-Barr virus infection	6	194	0.65	0.0273	9606.ENSP00000227752,9606.ENSP00000307235,9606.ENSP00000312988,9606.ENSP00000360266,9606.ENSP00000481570,9606.ENSP00000482657	IL10RA,EIF2AK3,NFKBIB,JUN,TNFAIP3,MAP3K14
hsa05210	Colorectal cancer	4	85	0.83	0.0324	9606.ENSP00000234420,9606.ENSP00000244869,9606.ENSP00000360025,9606.ENSP00000360266	MSH6,EREG,GADD45A,JUN
hsa05219	Bladder cancer	3	41	1.03	0.0324	9606.ENSP00000230990,9606.ENSP00000306512,9606.ENSP00000349547	HBEGF,CXCL8,RASSF1
hsa04660	T cell receptor signaling pathway	4	99	0.77	0.0465	9606.ENSP00000263056,9606.ENSP00000312988,9606.ENSP00000360266,9606.ENSP00000482657	MAP3K8,NFKBIB,JUN,MAP3K14
hsa04933	AGE-RAGE signaling pathway in diabetic complications	4	98	0.77	0.0465	9606.ENSP00000263339,9606.ENSP00000306512,9606.ENSP00000360266,9606.ENSP00000368683	IL1A,CXCL8,JUN,EDN1
hsa05030	Cocaine addiction	3	49	0.95	0.0465	9606.ENSP00000245919,9606.ENSP00000350359,9606.ENSP00000360266	FOSB,CREB5,JUN

## Sheet: Cntrl_vs_Coinfection_Bio_Up_24h
Supplementary table S8: Results from the Gene Ontology (GO) analysis in the category for biological process complete (GObp) and Pathway Enrichment (KEGG pathways) in co-infected cells at 24 hpi.
#term ID	term description	observed gene count	background gene count	strength	false discovery rate	matching proteins in your network (IDs)	matching proteins in your network (labels)
GO:0019222	regulation of metabolic process	86	6516	0.3	2.2e-11	9606.ENSP00000200453,9606.ENSP00000216037,9606.ENSP00000228437,9606.ENSP00000230990,9606.ENSP00000234420,9606.ENSP00000239223,9606.ENSP00000240100,9606.ENSP00000242480,9606.ENSP00000244869,9606.ENSP00000245919,9606.ENSP00000252809,9606.ENSP00000253063,9606.ENSP00000256458,9606.ENSP00000256495,9606.ENSP00000261845,9606.ENSP00000263056,9606.ENSP00000263339,9606.ENSP00000264444,9606.ENSP00000264711,…	PPP1R15A,XBP1,PRDM4,HBEGF,MSH6,DUSP1,DUSP4,EGR2,EREG,FOSB,GDF15,SESN2,IRAK2,BHLHE40,MAPK6,MAP3K8,IL1A,MXD1,DNAJC27,ARRDC3,SIK1,CSRNP1,EAF2,PLK2,NRBF2,DUSP6,EIF2AK3,DDIT4,FOSL1,NFKBIB,ZFAND2A,SERTAD3,YOD1,RAB12,OVOL1,ZBTB49,CCNYL1,ATF3,INSIG1,SPRY4,MAFF,RASSF1,CREB5,SERTAD1,EPHA2,TSC22D2,DUSP10,PTGS2,SGK1,CTGF,MCL1,DUSP5,PTBP2,GADD45A,JUN,LONRF3,ANKRD1,TSC22D3,ZC3H12A,ZBTB43,TSPYL2,ZNF165,ERRFI1,E…
GO:0031323	regulation of cellular metabolic process	83	6082	0.32	2.2e-11	9606.ENSP00000200453,9606.ENSP00000216037,9606.ENSP00000228437,9606.ENSP00000230990,9606.ENSP00000234420,9606.ENSP00000239223,9606.ENSP00000240100,9606.ENSP00000242480,9606.ENSP00000244869,9606.ENSP00000245919,9606.ENSP00000252809,9606.ENSP00000253063,9606.ENSP00000256458,9606.ENSP00000256495,9606.ENSP00000263056,9606.ENSP00000263339,9606.ENSP00000264444,9606.ENSP00000264711,9606.ENSP00000265138,…	PPP1R15A,XBP1,PRDM4,HBEGF,MSH6,DUSP1,DUSP4,EGR2,EREG,FOSB,GDF15,SESN2,IRAK2,BHLHE40,MAP3K8,IL1A,MXD1,DNAJC27,ARRDC3,SIK1,CSRNP1,EAF2,PLK2,NRBF2,DUSP6,EIF2AK3,DDIT4,FOSL1,NFKBIB,ZFAND2A,SERTAD3,YOD1,RAB12,OVOL1,ZBTB49,CCNYL1,ATF3,INSIG1,SPRY4,MAFF,RASSF1,CREB5,SERTAD1,EPHA2,TSC22D2,DUSP10,PTGS2,SGK1,CTGF,MCL1,DUSP5,PTBP2,GADD45A,JUN,LONRF3,ANKRD1,TSC22D3,ZC3H12A,ZBTB43,TSPYL2,ZNF165,ERRFI1,EDN1,XD…
GO:0033554	cellular response to stress	41	1553	0.6	2.2e-11	9606.ENSP00000200453,9606.ENSP00000216037,9606.ENSP00000222803,9606.ENSP00000234420,9606.ENSP00000249356,9606.ENSP00000253063,9606.ENSP00000256458,9606.ENSP00000263056,9606.ENSP00000263339,9606.ENSP00000272233,9606.ENSP00000274289,9606.ENSP00000277746,9606.ENSP00000306512,9606.ENSP00000307235,9606.ENSP00000307305,9606.ENSP00000326813,9606.ENSP00000344352,9606.ENSP00000344741,9606.ENSP00000349547,…	PPP1R15A,XBP1,FKBP14,MSH6,DNAJB9,SESN2,IRAK2,MAP3K8,IL1A,RHOB,PLK2,NRBF2,CXCL8,EIF2AK3,DDIT4,YOD1,ATF3,INSIG1,RASSF1,EPHA2,PTGS2,SGK1,MCL1,GADD45A,JUN,ANKRD1,ZC3H12A,TSPYL2,ERRFI1,EDN1,TDG,VIMP,NABP1,HERPUD1,CDKN2AIP,UBC,FICD,DDIT3,DNAJC3,TNFAIP3,MAP3K14
GO:0051171	regulation of nitrogen compound metabolic process	81	5827	0.32	2.2e-11	9606.ENSP00000200453,9606.ENSP00000216037,9606.ENSP00000228437,9606.ENSP00000230990,9606.ENSP00000234420,9606.ENSP00000239223,9606.ENSP00000240100,9606.ENSP00000242480,9606.ENSP00000244869,9606.ENSP00000245919,9606.ENSP00000252809,9606.ENSP00000253063,9606.ENSP00000256458,9606.ENSP00000256495,9606.ENSP00000263056,9606.ENSP00000263339,9606.ENSP00000264444,9606.ENSP00000264711,9606.ENSP00000265138,…	PPP1R15A,XBP1,PRDM4,HBEGF,MSH6,DUSP1,DUSP4,EGR2,EREG,FOSB,GDF15,SESN2,IRAK2,BHLHE40,MAP3K8,IL1A,MXD1,DNAJC27,ARRDC3,SIK1,CSRNP1,EAF2,PLK2,NRBF2,DUSP6,EIF2AK3,DDIT4,FOSL1,NFKBIB,ZFAND2A,SERTAD3,YOD1,OVOL1,ZBTB49,CCNYL1,ATF3,INSIG1,SPRY4,MAFF,RASSF1,CREB5,SERTAD1,EPHA2,TSC22D2,DUSP10,PTGS2,SGK1,CTGF,DUSP5,PTBP2,GADD45A,JUN,LONRF3,ANKRD1,TSC22D3,ZC3H12A,ZBTB43,TSPYL2,ZNF165,ERRFI1,EDN1,XDH,ZMYM5,TDG…
GO:0080090	regulation of primary metabolic process	82	5982	0.32	2.2e-11	9606.ENSP00000200453,9606.ENSP00000216037,9606.ENSP00000228437,9606.ENSP00000230990,9606.ENSP00000234420,9606.ENSP00000239223,9606.ENSP00000240100,9606.ENSP00000242480,9606.ENSP00000244869,9606.ENSP00000245919,9606.ENSP00000252809,9606.ENSP00000253063,9606.ENSP00000256458,9606.ENSP00000256495,9606.ENSP00000263056,9606.ENSP00000263339,9606.ENSP00000264444,9606.ENSP00000264711,9606.ENSP00000265138,…	PPP1R15A,XBP1,PRDM4,HBEGF,MSH6,DUSP1,DUSP4,EGR2,EREG,FOSB,GDF15,SESN2,IRAK2,BHLHE40,MAP3K8,IL1A,MXD1,DNAJC27,ARRDC3,SIK1,CSRNP1,EAF2,PLK2,NRBF2,DUSP6,EIF2AK3,DDIT4,FOSL1,NFKBIB,ZFAND2A,SERTAD3,YOD1,OVOL1,ZBTB49,CCNYL1,ATF3,INSIG1,SPRY4,MAFF,RASSF1,CREB5,SERTAD1,EPHA2,TSC22D2,DUSP10,PTGS2,SGK1,CTGF,DUSP5,PTBP2,GADD45A,JUN,LONRF3,ANKRD1,TSC22D3,ZC3H12A,ZBTB43,TSPYL2,ZNF165,ERRFI1,EDN1,XDH,ZMYM5,TDG…
GO:0006950	response to stress	58	3267	0.43	4.02e-11	9606.ENSP00000200453,9606.ENSP00000216037,9606.ENSP00000222803,9606.ENSP00000230990,9606.ENSP00000234420,9606.ENSP00000239223,9606.ENSP00000244869,9606.ENSP00000249356,9606.ENSP00000253063,9606.ENSP00000256458,9606.ENSP00000263056,9606.ENSP00000263339,9606.ENSP00000272233,9606.ENSP00000274289,9606.ENSP00000277746,9606.ENSP00000279488,9606.ENSP00000296026,9606.ENSP00000306512,9606.ENSP00000307235,…	PPP1R15A,XBP1,FKBP14,HBEGF,MSH6,DUSP1,EREG,DNAJB9,SESN2,IRAK2,MAP3K8,IL1A,RHOB,PLK2,NRBF2,DUSP6,CXCL3,CXCL8,EIF2AK3,DDIT4,FOSL1,YOD1,RAB12,ATF3,PEAR1,INSIG1,MAFF,RASSF1,EPHA2,TSC22D2,PTGS2,SGK1,CTGF,MCL1,GADD45A,JUN,ANKRD1,TSC22D3,ZC3H12A,TSPYL2,ERRFI1,EDN1,TDG,HRH1,VIMP,CYR61,NABP1,HERPUD1,CDKN2AIP,CXCL2,MANF,UBC,FICD,DDIT3,DNAJC3,TNFAIP3,NR4A3,MAP3K14
GO:0060255	regulation of macromolecule metabolic process	81	6072	0.31	5.6e-11	9606.ENSP00000200453,9606.ENSP00000216037,9606.ENSP00000228437,9606.ENSP00000230990,9606.ENSP00000234420,9606.ENSP00000239223,9606.ENSP00000240100,9606.ENSP00000242480,9606.ENSP00000244869,9606.ENSP00000245919,9606.ENSP00000252809,9606.ENSP00000253063,9606.ENSP00000256458,9606.ENSP00000256495,9606.ENSP00000261845,9606.ENSP00000263056,9606.ENSP00000263339,9606.ENSP00000264444,9606.ENSP00000264711,…	PPP1R15A,XBP1,PRDM4,HBEGF,MSH6,DUSP1,DUSP4,EGR2,EREG,FOSB,GDF15,SESN2,IRAK2,BHLHE40,MAPK6,MAP3K8,IL1A,MXD1,DNAJC27,ARRDC3,SIK1,CSRNP1,EAF2,PLK2,NRBF2,DUSP6,EIF2AK3,DDIT4,FOSL1,NFKBIB,ZFAND2A,SERTAD3,YOD1,OVOL1,ZBTB49,CCNYL1,ATF3,INSIG1,SPRY4,MAFF,RASSF1,CREB5,SERTAD1,EPHA2,TSC22D2,DUSP10,PTGS2,SGK1,CTGF,DUSP5,PTBP2,GADD45A,JUN,LONRF3,ANKRD1,TSC22D3,ZC3H12A,ZBTB43,TSPYL2,ZNF165,ERRFI1,EDN1,XDH,ZMY…
GO:0071310	cellular response to organic substance	47	2219	0.51	5.6e-11	9606.ENSP00000216037,9606.ENSP00000222803,9606.ENSP00000227752,9606.ENSP00000239223,9606.ENSP00000242480,9606.ENSP00000244869,9606.ENSP00000245919,9606.ENSP00000249356,9606.ENSP00000252809,9606.ENSP00000253063,9606.ENSP00000256458,9606.ENSP00000261845,9606.ENSP00000263056,9606.ENSP00000263339,9606.ENSP00000270162,9606.ENSP00000296026,9606.ENSP00000306512,9606.ENSP00000307235,9606.ENSP00000307305,…	XBP1,FKBP14,IL10RA,DUSP1,EGR2,EREG,FOSB,DNAJB9,GDF15,SESN2,IRAK2,MAPK6,MAP3K8,IL1A,SIK1,CXCL3,CXCL8,EIF2AK3,DDIT4,NFKBIB,TNFRSF12A,YOD1,RAB12,ATF3,INSIG1,PTGS2,CTGF,MCL1,JUN,ANKRD1,ZC3H12A,TSPYL2,ERRFI1,EDN1,PIGA,HRH1,VIMP,ESRP1,HERPUD1,TIPARP,CXCL2,UBC,DDIT3,DNAJC3,TNFAIP3,NR4A3,MAP3K14
GO:0010033	response to organic substance	53	2815	0.46	6.12e-11	9606.ENSP00000216037,9606.ENSP00000222803,9606.ENSP00000227752,9606.ENSP00000239223,9606.ENSP00000242480,9606.ENSP00000244869,9606.ENSP00000245919,9606.ENSP00000249356,9606.ENSP00000252809,9606.ENSP00000253063,9606.ENSP00000256458,9606.ENSP00000261845,9606.ENSP00000263056,9606.ENSP00000263339,9606.ENSP00000270162,9606.ENSP00000279488,9606.ENSP00000296026,9606.ENSP00000306512,9606.ENSP00000307235,…	XBP1,FKBP14,IL10RA,DUSP1,EGR2,EREG,FOSB,DNAJB9,GDF15,SESN2,IRAK2,MAPK6,MAP3K8,IL1A,SIK1,DUSP6,CXCL3,CXCL8,EIF2AK3,DDIT4,FOSL1,NFKBIB,TNFRSF12A,YOD1,RAB12,ATF3,INSIG1,EPHA2,DUSP10,PTGS2,CTGF,MCL1,JUN,ANKRD1,ZC3H12A,TSPYL2,ERRFI1,EDN1,PIGA,HRH1,VIMP,ESRP1,HERPUD1,TIPARP,CXCL2,MANF,UBC,FICD,DDIT3,DNAJC3,TNFAIP3,NR4A3,MAP3K14
GO:0070887	cellular response to chemical stimulus	51	2672	0.46	1.21e-10	9606.ENSP00000216037,9606.ENSP00000222803,9606.ENSP00000227752,9606.ENSP00000230990,9606.ENSP00000239223,9606.ENSP00000242480,9606.ENSP00000244869,9606.ENSP00000245919,9606.ENSP00000249356,9606.ENSP00000252809,9606.ENSP00000253063,9606.ENSP00000256458,9606.ENSP00000261845,9606.ENSP00000263056,9606.ENSP00000263339,9606.ENSP00000270162,9606.ENSP00000272233,9606.ENSP00000296026,9606.ENSP00000306512,…	XBP1,FKBP14,IL10RA,HBEGF,DUSP1,EGR2,EREG,FOSB,DNAJB9,GDF15,SESN2,IRAK2,MAPK6,MAP3K8,IL1A,SIK1,RHOB,CXCL3,CXCL8,EIF2AK3,DDIT4,NFKBIB,ZFAND2A,TNFRSF12A,YOD1,RAB12,ATF3,INSIG1,EPHA2,PTGS2,CTGF,MCL1,JUN,ANKRD1,ZC3H12A,TSPYL2,ERRFI1,EDN1,PIGA,HRH1,VIMP,ESRP1,HERPUD1,TIPARP,CXCL2,UBC,DDIT3,DNAJC3,TNFAIP3,NR4A3,MAP3K14
GO:0010646	regulation of cell communication	57	3327	0.41	1.9e-10	9606.ENSP00000200453,9606.ENSP00000216037,9606.ENSP00000230990,9606.ENSP00000239223,9606.ENSP00000240100,9606.ENSP00000242480,9606.ENSP00000244869,9606.ENSP00000249356,9606.ENSP00000252809,9606.ENSP00000253063,9606.ENSP00000256458,9606.ENSP00000259874,9606.ENSP00000263056,9606.ENSP00000263339,9606.ENSP00000264711,9606.ENSP00000265138,9606.ENSP00000272233,9606.ENSP00000274289,9606.ENSP00000279488,…	PPP1R15A,XBP1,HBEGF,DUSP1,DUSP4,EGR2,EREG,DNAJB9,GDF15,SESN2,IRAK2,IER3,MAP3K8,IL1A,DNAJC27,ARRDC3,RHOB,PLK2,DUSP6,CXCL3,CXCL8,EIF2AK3,DDIT4,LURAP1L,TNFRSF12A,ATF3,PEAR1,INSIG1,SPRY4,EPHA2,OSGIN1,DUSP10,PTGS2,RGS16,CTGF,MCL1,DUSP5,GADD45A,JUN,ANKRD1,ZC3H12A,TSPYL2,ERRFI1,EDN1,XDH,HRH1,VIMP,CYR61,HERPUD1,CDKN2AIP,CXCL2,MANF,UBC,FICD,DDIT3,TNFAIP3,MAP3K14
GO:0009966	regulation of signal transduction	54	3033	0.43	2.27e-10	9606.ENSP00000200453,9606.ENSP00000216037,9606.ENSP00000230990,9606.ENSP00000239223,9606.ENSP00000240100,9606.ENSP00000244869,9606.ENSP00000249356,9606.ENSP00000252809,9606.ENSP00000253063,9606.ENSP00000256458,9606.ENSP00000259874,9606.ENSP00000263056,9606.ENSP00000263339,9606.ENSP00000264711,9606.ENSP00000265138,9606.ENSP00000272233,9606.ENSP00000279488,9606.ENSP00000296026,9606.ENSP00000306512,…	PPP1R15A,XBP1,HBEGF,DUSP1,DUSP4,EREG,DNAJB9,GDF15,SESN2,IRAK2,IER3,MAP3K8,IL1A,DNAJC27,ARRDC3,RHOB,DUSP6,CXCL3,CXCL8,EIF2AK3,DDIT4,LURAP1L,TNFRSF12A,ATF3,PEAR1,INSIG1,SPRY4,EPHA2,OSGIN1,DUSP10,PTGS2,RGS16,CTGF,MCL1,DUSP5,GADD45A,JUN,ANKRD1,ZC3H12A,TSPYL2,ERRFI1,EDN1,XDH,VIMP,CYR61,HERPUD1,CDKN2AIP,CXCL2,MANF,UBC,FICD,DDIT3,TNFAIP3,MAP3K14
GO:0023051	regulation of signaling	57	3360	0.41	2.42e-10	9606.ENSP00000200453,9606.ENSP00000216037,9606.ENSP00000230990,9606.ENSP00000239223,9606.ENSP00000240100,9606.ENSP00000242480,9606.ENSP00000244869,9606.ENSP00000249356,9606.ENSP00000252809,9606.ENSP00000253063,9606.ENSP00000256458,9606.ENSP00000259874,9606.ENSP00000263056,9606.ENSP00000263339,9606.ENSP00000264711,9606.ENSP00000265138,9606.ENSP00000272233,9606.ENSP00000274289,9606.ENSP00000279488,…	PPP1R15A,XBP1,HBEGF,DUSP1,DUSP4,EGR2,EREG,DNAJB9,GDF15,SESN2,IRAK2,IER3,MAP3K8,IL1A,DNAJC27,ARRDC3,RHOB,PLK2,DUSP6,CXCL3,CXCL8,EIF2AK3,DDIT4,LURAP1L,TNFRSF12A,ATF3,PEAR1,INSIG1,SPRY4,EPHA2,OSGIN1,DUSP10,PTGS2,RGS16,CTGF,MCL1,DUSP5,GADD45A,JUN,ANKRD1,ZC3H12A,TSPYL2,ERRFI1,EDN1,XDH,HRH1,VIMP,CYR61,HERPUD1,CDKN2AIP,CXCL2,MANF,UBC,FICD,DDIT3,TNFAIP3,MAP3K14
GO:0034976	response to endoplasmic reticulum stress	17	240	1.03	2.42e-10	9606.ENSP00000200453,9606.ENSP00000216037,9606.ENSP00000222803,9606.ENSP00000249356,9606.ENSP00000253063,9606.ENSP00000277746,9606.ENSP00000306512,9606.ENSP00000307235,9606.ENSP00000326813,9606.ENSP00000344352,9606.ENSP00000360266,9606.ENSP00000364591,9606.ENSP00000381282,9606.ENSP00000409555,9606.ENSP00000446479,9606.ENSP00000448665,9606.ENSP00000473631	PPP1R15A,XBP1,FKBP14,DNAJB9,SESN2,NRBF2,CXCL8,EIF2AK3,YOD1,ATF3,JUN,TSPYL2,VIMP,HERPUD1,FICD,DDIT3,DNAJC3
GO:0051173	positive regulation of nitrogen compound metabolic process	52	2946	0.43	8.14e-10	9606.ENSP00000200453,9606.ENSP00000216037,9606.ENSP00000228437,9606.ENSP00000230990,9606.ENSP00000234420,9606.ENSP00000242480,9606.ENSP00000244869,9606.ENSP00000245919,9606.ENSP00000252809,9606.ENSP00000253063,9606.ENSP00000256458,9606.ENSP00000263056,9606.ENSP00000263339,9606.ENSP00000264711,9606.ENSP00000265138,9606.ENSP00000273153,9606.ENSP00000273668,9606.ENSP00000274289,9606.ENSP00000279488,…	PPP1R15A,XBP1,PRDM4,HBEGF,MSH6,EGR2,EREG,FOSB,GDF15,SESN2,IRAK2,MAP3K8,IL1A,DNAJC27,ARRDC3,CSRNP1,EAF2,PLK2,DUSP6,EIF2AK3,FOSL1,NFKBIB,ZFAND2A,SERTAD3,ZBTB49,ATF3,INSIG1,MAFF,RASSF1,CREB5,SERTAD1,PTGS2,CTGF,DUSP5,GADD45A,JUN,LONRF3,ANKRD1,ZC3H12A,EDN1,XDH,CYR61,HERPUD1,DCUN1D2,KLF6,TIPARP,UBC,DDIT3,DNAJC3,TNFAIP3,NR4A3,MAP3K14
GO:0080135	regulation of cellular response to stress	24	618	0.77	8.14e-10	9606.ENSP00000200453,9606.ENSP00000216037,9606.ENSP00000249356,9606.ENSP00000259874,9606.ENSP00000274289,9606.ENSP00000307235,9606.ENSP00000326813,9606.ENSP00000344741,9606.ENSP00000355866,9606.ENSP00000356438,9606.ENSP00000356954,9606.ENSP00000358022,9606.ENSP00000360025,9606.ENSP00000360762,9606.ENSP00000362179,9606.ENSP00000368683,9606.ENSP00000368727,9606.ENSP00000381282,9606.ENSP00000409555,…	PPP1R15A,XBP1,DNAJB9,IER3,PLK2,EIF2AK3,YOD1,INSIG1,DUSP10,PTGS2,CTGF,MCL1,GADD45A,ANKRD1,ZC3H12A,EDN1,XDH,VIMP,HERPUD1,MANF,FICD,DDIT3,DNAJC3,NR4A3
GO:0006986	response to unfolded protein	14	153	1.14	8.53e-10	9606.ENSP00000216037,9606.ENSP00000222803,9606.ENSP00000249356,9606.ENSP00000306512,9606.ENSP00000307235,9606.ENSP00000326813,9606.ENSP00000344352,9606.ENSP00000364591,9606.ENSP00000381282,9606.ENSP00000409555,9606.ENSP00000432799,9606.ENSP00000446479,9606.ENSP00000448665,9606.ENSP00000473631	XBP1,FKBP14,DNAJB9,CXCL8,EIF2AK3,YOD1,ATF3,TSPYL2,VIMP,HERPUD1,MANF,FICD,DDIT3,DNAJC3
GO:0031325	positive regulation of cellular metabolic process	53	3060	0.42	8.53e-10	9606.ENSP00000200453,9606.ENSP00000216037,9606.ENSP00000228437,9606.ENSP00000230990,9606.ENSP00000234420,9606.ENSP00000242480,9606.ENSP00000244869,9606.ENSP00000245919,9606.ENSP00000252809,9606.ENSP00000253063,9606.ENSP00000256458,9606.ENSP00000263056,9606.ENSP00000263339,9606.ENSP00000264711,9606.ENSP00000265138,9606.ENSP00000273153,9606.ENSP00000273668,9606.ENSP00000274289,9606.ENSP00000279488,…	PPP1R15A,XBP1,PRDM4,HBEGF,MSH6,EGR2,EREG,FOSB,GDF15,SESN2,IRAK2,MAP3K8,IL1A,DNAJC27,ARRDC3,CSRNP1,EAF2,PLK2,DUSP6,EIF2AK3,FOSL1,NFKBIB,ZFAND2A,SERTAD3,RAB12,ZBTB49,ATF3,INSIG1,MAFF,RASSF1,CREB5,SERTAD1,PTGS2,CTGF,DUSP5,GADD45A,JUN,LONRF3,ANKRD1,ZC3H12A,EDN1,XDH,HRH1,CYR61,HERPUD1,DCUN1D2,KLF6,UBC,DDIT3,DNAJC3,TNFAIP3,NR4A3,MAP3K14
GO:0009893	positive regulation of metabolic process	55	3280	0.41	8.73e-10	9606.ENSP00000200453,9606.ENSP00000216037,9606.ENSP00000228437,9606.ENSP00000230990,9606.ENSP00000234420,9606.ENSP00000242480,9606.ENSP00000244869,9606.ENSP00000245919,9606.ENSP00000252809,9606.ENSP00000253063,9606.ENSP00000256458,9606.ENSP00000263056,9606.ENSP00000263339,9606.ENSP00000264711,9606.ENSP00000265138,9606.ENSP00000273153,9606.ENSP00000273668,9606.ENSP00000274289,9606.ENSP00000279488,…	PPP1R15A,XBP1,PRDM4,HBEGF,MSH6,EGR2,EREG,FOSB,GDF15,SESN2,IRAK2,MAP3K8,IL1A,DNAJC27,ARRDC3,CSRNP1,EAF2,PLK2,DUSP6,EIF2AK3,FOSL1,NFKBIB,ZFAND2A,SERTAD3,RAB12,ZBTB49,ATF3,INSIG1,MAFF,RASSF1,CREB5,SERTAD1,PTGS2,CTGF,DUSP5,GADD45A,JUN,LONRF3,ANKRD1,ZC3H12A,EDN1,XDH,PIGA,HRH1,CYR61,HERPUD1,DCUN1D2,KLF6,TIPARP,UBC,DDIT3,DNAJC3,TNFAIP3,NR4A3,MAP3K14
GO:0019220	regulation of phosphate metabolic process	38	1657	0.54	9.96e-10	9606.ENSP00000200453,9606.ENSP00000216037,9606.ENSP00000230990,9606.ENSP00000239223,9606.ENSP00000240100,9606.ENSP00000244869,9606.ENSP00000252809,9606.ENSP00000253063,9606.ENSP00000256458,9606.ENSP00000263056,9606.ENSP00000264711,9606.ENSP00000277746,9606.ENSP00000279488,9606.ENSP00000307235,9606.ENSP00000307305,9606.ENSP00000342344,9606.ENSP00000344352,9606.ENSP00000344967,9606.ENSP00000350633,…	PPP1R15A,XBP1,HBEGF,DUSP1,DUSP4,EREG,GDF15,SESN2,IRAK2,MAP3K8,DNAJC27,NRBF2,DUSP6,EIF2AK3,DDIT4,CCNYL1,ATF3,SPRY4,SERTAD1,EPHA2,DUSP10,PTGS2,CTGF,DUSP5,GADD45A,JUN,ZC3H12A,TSPYL2,ERRFI1,EDN1,XDH,PDP1,HRH1,CYR61,UBC,DNAJC3,TNFAIP3,MAP3K14
GO:0031399	regulation of protein modification process	39	1747	0.53	9.96e-10	9606.ENSP00000200453,9606.ENSP00000216037,9606.ENSP00000230990,9606.ENSP00000239223,9606.ENSP00000240100,9606.ENSP00000244869,9606.ENSP00000252809,9606.ENSP00000253063,9606.ENSP00000256458,9606.ENSP00000263056,9606.ENSP00000264711,9606.ENSP00000265138,9606.ENSP00000279488,9606.ENSP00000307235,9606.ENSP00000307305,9606.ENSP00000342344,9606.ENSP00000344352,9606.ENSP00000344967,9606.ENSP00000349547,…	PPP1R15A,XBP1,HBEGF,DUSP1,DUSP4,EREG,GDF15,SESN2,IRAK2,MAP3K8,DNAJC27,ARRDC3,DUSP6,EIF2AK3,DDIT4,CCNYL1,ATF3,SPRY4,RASSF1,SERTAD1,EPHA2,DUSP10,PTGS2,CTGF,DUSP5,GADD45A,JUN,ZC3H12A,TSPYL2,ERRFI1,EDN1,XDH,CYR61,HERPUD1,DCUN1D2,UBC,DNAJC3,TNFAIP3,MAP3K14
GO:1902531	regulation of intracellular signal transduction	39	1764	0.53	1.25e-09	9606.ENSP00000216037,9606.ENSP00000230990,9606.ENSP00000239223,9606.ENSP00000240100,9606.ENSP00000244869,9606.ENSP00000252809,9606.ENSP00000253063,9606.ENSP00000256458,9606.ENSP00000259874,9606.ENSP00000263056,9606.ENSP00000264711,9606.ENSP00000265138,9606.ENSP00000272233,9606.ENSP00000279488,9606.ENSP00000307235,9606.ENSP00000307305,9606.ENSP00000321026,9606.ENSP00000344352,9606.ENSP00000344967,…	XBP1,HBEGF,DUSP1,DUSP4,EREG,GDF15,SESN2,IRAK2,IER3,MAP3K8,DNAJC27,ARRDC3,RHOB,DUSP6,EIF2AK3,DDIT4,LURAP1L,ATF3,SPRY4,EPHA2,DUSP10,PTGS2,CTGF,MCL1,DUSP5,GADD45A,JUN,ANKRD1,ZC3H12A,ERRFI1,EDN1,XDH,VIMP,CYR61,HERPUD1,UBC,DDIT3,TNFAIP3,MAP3K14
GO:0030968	endoplasmic reticulum unfolded protein response	12	103	1.25	1.62e-09	9606.ENSP00000216037,9606.ENSP00000222803,9606.ENSP00000249356,9606.ENSP00000306512,9606.ENSP00000307235,9606.ENSP00000326813,9606.ENSP00000344352,9606.ENSP00000364591,9606.ENSP00000381282,9606.ENSP00000409555,9606.ENSP00000448665,9606.ENSP00000473631	XBP1,FKBP14,DNAJB9,CXCL8,EIF2AK3,YOD1,ATF3,TSPYL2,VIMP,HERPUD1,DDIT3,DNAJC3
GO:0001932	regulation of protein phosphorylation	34	1370	0.58	1.76e-09	9606.ENSP00000216037,9606.ENSP00000230990,9606.ENSP00000239223,9606.ENSP00000240100,9606.ENSP00000244869,9606.ENSP00000252809,9606.ENSP00000253063,9606.ENSP00000256458,9606.ENSP00000263056,9606.ENSP00000264711,9606.ENSP00000279488,9606.ENSP00000307235,9606.ENSP00000307305,9606.ENSP00000342344,9606.ENSP00000344352,9606.ENSP00000344967,9606.ENSP00000350633,9606.ENSP00000351209,9606.ENSP00000355866,…	XBP1,HBEGF,DUSP1,DUSP4,EREG,GDF15,SESN2,IRAK2,MAP3K8,DNAJC27,DUSP6,EIF2AK3,DDIT4,CCNYL1,ATF3,SPRY4,SERTAD1,EPHA2,DUSP10,PTGS2,CTGF,DUSP5,GADD45A,JUN,ZC3H12A,TSPYL2,ERRFI1,EDN1,XDH,CYR61,UBC,DNAJC3,TNFAIP3,MAP3K14
GO:0042325	regulation of phosphorylation	35	1465	0.56	2.21e-09	9606.ENSP00000216037,9606.ENSP00000230990,9606.ENSP00000239223,9606.ENSP00000240100,9606.ENSP00000244869,9606.ENSP00000252809,9606.ENSP00000253063,9606.ENSP00000256458,9606.ENSP00000263056,9606.ENSP00000264711,9606.ENSP00000277746,9606.ENSP00000279488,9606.ENSP00000307235,9606.ENSP00000307305,9606.ENSP00000342344,9606.ENSP00000344352,9606.ENSP00000344967,9606.ENSP00000350633,9606.ENSP00000351209,…	XBP1,HBEGF,DUSP1,DUSP4,EREG,GDF15,SESN2,IRAK2,MAP3K8,DNAJC27,NRBF2,DUSP6,EIF2AK3,DDIT4,CCNYL1,ATF3,SPRY4,SERTAD1,EPHA2,DUSP10,PTGS2,CTGF,DUSP5,GADD45A,JUN,ZC3H12A,TSPYL2,ERRFI1,EDN1,XDH,CYR61,UBC,DNAJC3,TNFAIP3,MAP3K14
GO:0048522	positive regulation of cellular process	68	4898	0.32	2.21e-09	9606.ENSP00000200453,9606.ENSP00000216037,9606.ENSP00000228437,9606.ENSP00000230990,9606.ENSP00000234420,9606.ENSP00000239223,9606.ENSP00000242480,9606.ENSP00000244869,9606.ENSP00000245919,9606.ENSP00000252809,9606.ENSP00000253063,9606.ENSP00000256458,9606.ENSP00000261845,9606.ENSP00000263056,9606.ENSP00000263339,9606.ENSP00000264711,9606.ENSP00000265138,9606.ENSP00000270162,9606.ENSP00000272233,…	PPP1R15A,XBP1,PRDM4,HBEGF,MSH6,DUSP1,EGR2,EREG,FOSB,GDF15,SESN2,IRAK2,MAPK6,MAP3K8,IL1A,DNAJC27,ARRDC3,SIK1,RHOB,CSRNP1,EAF2,PLK2,DUSP6,CXCL3,CXCL8,EIF2AK3,DDIT4,FOSL1,NFKBIB,ZFAND2A,LURAP1L,SERTAD3,TNFRSF12A,RAB12,OVOL1,ZBTB49,ATF3,INSIG1,MAFF,RASSF1,CREB5,SERTAD1,OSGIN1,DUSP10,PTGS2,CTGF,MCL1,DUSP5,GADD45A,JUN,LONRF3,ANKRD1,ZC3H12A,EDN1,XDH,HRH1,CYR61,HERPUD1,DCUN1D2,KLF6,CDKN2AIP,CXCL2,UBC,DDI…
GO:1905897	regulation of response to endoplasmic reticulum stress	11	81	1.31	2.24e-09	9606.ENSP00000200453,9606.ENSP00000216037,9606.ENSP00000249356,9606.ENSP00000307235,9606.ENSP00000326813,9606.ENSP00000381282,9606.ENSP00000409555,9606.ENSP00000432799,9606.ENSP00000446479,9606.ENSP00000448665,9606.ENSP00000473631	PPP1R15A,XBP1,DNAJB9,EIF2AK3,YOD1,VIMP,HERPUD1,MANF,FICD,DDIT3,DNAJC3
GO:0010604	positive regulation of macromolecule metabolic process	52	3081	0.41	2.38e-09	9606.ENSP00000200453,9606.ENSP00000216037,9606.ENSP00000228437,9606.ENSP00000230990,9606.ENSP00000234420,9606.ENSP00000242480,9606.ENSP00000244869,9606.ENSP00000245919,9606.ENSP00000252809,9606.ENSP00000253063,9606.ENSP00000256458,9606.ENSP00000263056,9606.ENSP00000263339,9606.ENSP00000264711,9606.ENSP00000265138,9606.ENSP00000273153,9606.ENSP00000273668,9606.ENSP00000274289,9606.ENSP00000279488,…	PPP1R15A,XBP1,PRDM4,HBEGF,MSH6,EGR2,EREG,FOSB,GDF15,SESN2,IRAK2,MAP3K8,IL1A,DNAJC27,ARRDC3,CSRNP1,EAF2,PLK2,DUSP6,EIF2AK3,FOSL1,NFKBIB,ZFAND2A,SERTAD3,ZBTB49,ATF3,INSIG1,MAFF,RASSF1,CREB5,SERTAD1,PTGS2,CTGF,DUSP5,GADD45A,JUN,LONRF3,ANKRD1,ZC3H12A,EDN1,XDH,CYR61,HERPUD1,DCUN1D2,KLF6,TIPARP,UBC,DDIT3,DNAJC3,TNFAIP3,NR4A3,MAP3K14
GO:0048585	negative regulation of response to stimulus	35	1483	0.55	2.58e-09	9606.ENSP00000200453,9606.ENSP00000216037,9606.ENSP00000239223,9606.ENSP00000240100,9606.ENSP00000249356,9606.ENSP00000252809,9606.ENSP00000253063,9606.ENSP00000263339,9606.ENSP00000265138,9606.ENSP00000274289,9606.ENSP00000279488,9606.ENSP00000306512,9606.ENSP00000307305,9606.ENSP00000326813,9606.ENSP00000344352,9606.ENSP00000344465,9606.ENSP00000344741,9606.ENSP00000344967,9606.ENSP00000351209,…	PPP1R15A,XBP1,DUSP1,DUSP4,DNAJB9,GDF15,SESN2,IL1A,ARRDC3,PLK2,DUSP6,CXCL8,DDIT4,YOD1,ATF3,PEAR1,INSIG1,SPRY4,EPHA2,DUSP10,PTGS2,RGS16,MCL1,DUSP5,ZC3H12A,ERRFI1,EDN1,XDH,VIMP,HERPUD1,UBC,DDIT3,DNAJC3,TNFAIP3,NR4A3
GO:0048523	negative regulation of cellular process	64	4454	0.34	2.82e-09	9606.ENSP00000200453,9606.ENSP00000216037,9606.ENSP00000230990,9606.ENSP00000234420,9606.ENSP00000239223,9606.ENSP00000240100,9606.ENSP00000244869,9606.ENSP00000245919,9606.ENSP00000249356,9606.ENSP00000252809,9606.ENSP00000253063,9606.ENSP00000256495,9606.ENSP00000259874,9606.ENSP00000263339,9606.ENSP00000264444,9606.ENSP00000265138,9606.ENSP00000270162,9606.ENSP00000272233,9606.ENSP00000273668,…	PPP1R15A,XBP1,HBEGF,MSH6,DUSP1,DUSP4,EREG,FOSB,DNAJB9,GDF15,SESN2,BHLHE40,IER3,IL1A,MXD1,ARRDC3,SIK1,RHOB,EAF2,PLK2,DUSP6,CXCL8,EIF2AK3,DDIT4,FOSL1,SERTAD3,YOD1,OVOL1,ZBTB49,ATF3,PEAR1,INSIG1,SPRY4,RASSF1,EPHA2,OSGIN1,DUSP10,PTGS2,RGS16,CTGF,MCL1,DUSP5,PTBP2,GADD45A,JUN,ANKRD1,TSC22D3,ZC3H12A,TSPYL2,ERRFI1,EDN1,XDH,TDG,VIMP,CYR61,NABP1,HERPUD1,CDKN2AIP,USP36,UBC,DDIT3,DNAJC3,TNFAIP3,NR4A3
GO:0010648	negative regulation of cell communication	32	1255	0.59	2.99e-09	9606.ENSP00000200453,9606.ENSP00000216037,9606.ENSP00000239223,9606.ENSP00000240100,9606.ENSP00000249356,9606.ENSP00000252809,9606.ENSP00000253063,9606.ENSP00000263339,9606.ENSP00000265138,9606.ENSP00000274289,9606.ENSP00000279488,9606.ENSP00000306512,9606.ENSP00000307305,9606.ENSP00000344352,9606.ENSP00000344465,9606.ENSP00000344741,9606.ENSP00000344967,9606.ENSP00000351209,9606.ENSP00000355866,…	PPP1R15A,XBP1,DUSP1,DUSP4,DNAJB9,GDF15,SESN2,IL1A,ARRDC3,PLK2,DUSP6,CXCL8,DDIT4,ATF3,PEAR1,INSIG1,SPRY4,EPHA2,DUSP10,PTGS2,RGS16,MCL1,DUSP5,ZC3H12A,ERRFI1,EDN1,XDH,VIMP,HERPUD1,UBC,DDIT3,TNFAIP3
GO:0023057	negative regulation of signaling	32	1258	0.59	2.99e-09	9606.ENSP00000200453,9606.ENSP00000216037,9606.ENSP00000239223,9606.ENSP00000240100,9606.ENSP00000249356,9606.ENSP00000252809,9606.ENSP00000253063,9606.ENSP00000263339,9606.ENSP00000265138,9606.ENSP00000274289,9606.ENSP00000279488,9606.ENSP00000306512,9606.ENSP00000307305,9606.ENSP00000344352,9606.ENSP00000344465,9606.ENSP00000344741,9606.ENSP00000344967,9606.ENSP00000351209,9606.ENSP00000355866,…	PPP1R15A,XBP1,DUSP1,DUSP4,DNAJB9,GDF15,SESN2,IL1A,ARRDC3,PLK2,DUSP6,CXCL8,DDIT4,ATF3,PEAR1,INSIG1,SPRY4,EPHA2,DUSP10,PTGS2,RGS16,MCL1,DUSP5,ZC3H12A,ERRFI1,EDN1,XDH,VIMP,HERPUD1,UBC,DDIT3,TNFAIP3
GO:0042981	regulation of apoptotic process	35	1501	0.55	2.99e-09	9606.ENSP00000216037,9606.ENSP00000239223,9606.ENSP00000252809,9606.ENSP00000259874,9606.ENSP00000263056,9606.ENSP00000263339,9606.ENSP00000270162,9606.ENSP00000272233,9606.ENSP00000274289,9606.ENSP00000279488,9606.ENSP00000307235,9606.ENSP00000310170,9606.ENSP00000326737,9606.ENSP00000344352,9606.ENSP00000355374,9606.ENSP00000356438,9606.ENSP00000356832,9606.ENSP00000356954,9606.ENSP00000358022,…	XBP1,DUSP1,GDF15,IER3,MAP3K8,IL1A,SIK1,RHOB,PLK2,DUSP6,EIF2AK3,FOSL1,TNFRSF12A,ATF3,OSGIN1,PTGS2,SGK1,CTGF,MCL1,GADD45A,JUN,ANKRD1,TSC22D3,ZC3H12A,EDN1,XDH,VIMP,CYR61,HERPUD1,UBC,DDIT3,DNAJC3,TNFAIP3,NR4A3,MAP3K14
GO:0048518	positive regulation of biological process	72	5459	0.3	2.99e-09	9606.ENSP00000200453,9606.ENSP00000216037,9606.ENSP00000228437,9606.ENSP00000230990,9606.ENSP00000234420,9606.ENSP00000239223,9606.ENSP00000242480,9606.ENSP00000244869,9606.ENSP00000245919,9606.ENSP00000252809,9606.ENSP00000253063,9606.ENSP00000256458,9606.ENSP00000261845,9606.ENSP00000263056,9606.ENSP00000263339,9606.ENSP00000264711,9606.ENSP00000265138,9606.ENSP00000270162,9606.ENSP00000272233,…	PPP1R15A,XBP1,PRDM4,HBEGF,MSH6,DUSP1,EGR2,EREG,FOSB,GDF15,SESN2,IRAK2,MAPK6,MAP3K8,IL1A,DNAJC27,ARRDC3,SIK1,RHOB,CSRNP1,EAF2,PLK2,DUSP6,CXCL3,CXCL8,EIF2AK3,DDIT4,FOSL1,NFKBIB,ZFAND2A,LURAP1L,SERTAD3,TNFRSF12A,RAB12,OVOL1,ZBTB49,ATF3,INSIG1,MAFF,RASSF1,CREB5,SERTAD1,EPHA2,OSGIN1,DUSP10,PTGS2,SGK1,CTGF,MCL1,DUSP5,GADD45A,JUN,LONRF3,ANKRD1,ZC3H12A,EDN1,XDH,PIGA,HRH1,CYR61,HERPUD1,DCUN1D2,KLF6,TIPARP…
GO:0048519	negative regulation of biological process	68	4953	0.32	2.99e-09	9606.ENSP00000200453,9606.ENSP00000216037,9606.ENSP00000230990,9606.ENSP00000234420,9606.ENSP00000239223,9606.ENSP00000240100,9606.ENSP00000244869,9606.ENSP00000245919,9606.ENSP00000249356,9606.ENSP00000252809,9606.ENSP00000253063,9606.ENSP00000256458,9606.ENSP00000256495,9606.ENSP00000259874,9606.ENSP00000263339,9606.ENSP00000264444,9606.ENSP00000265138,9606.ENSP00000270162,9606.ENSP00000272233,…	PPP1R15A,XBP1,HBEGF,MSH6,DUSP1,DUSP4,EREG,FOSB,DNAJB9,GDF15,SESN2,IRAK2,BHLHE40,IER3,IL1A,MXD1,ARRDC3,SIK1,RHOB,EAF2,PLK2,DUSP6,CXCL8,EIF2AK3,DDIT4,FOSL1,SERTAD3,YOD1,OVOL1,ZBTB49,ATF3,PEAR1,INSIG1,SPRY4,RASSF1,EPHA2,OSGIN1,DUSP10,PTGS2,RGS16,CTGF,MCL1,DUSP5,PTBP2,GADD45A,JUN,ANKRD1,TSC22D3,YRDC,ZC3H12A,TSPYL2,ERRFI1,EDN1,XDH,TDG,VIMP,CYR61,NABP1,HERPUD1,TIPARP,CDKN2AIP,USP36,UBC,FICD,DDIT3,DNAJC…
GO:0048583	regulation of response to stimulus	59	3882	0.36	2.99e-09	9606.ENSP00000200453,9606.ENSP00000216037,9606.ENSP00000230990,9606.ENSP00000234420,9606.ENSP00000239223,9606.ENSP00000240100,9606.ENSP00000244869,9606.ENSP00000249356,9606.ENSP00000252809,9606.ENSP00000253063,9606.ENSP00000256458,9606.ENSP00000259874,9606.ENSP00000263056,9606.ENSP00000263339,9606.ENSP00000264711,9606.ENSP00000265138,9606.ENSP00000272233,9606.ENSP00000274289,9606.ENSP00000279488,…	PPP1R15A,XBP1,HBEGF,MSH6,DUSP1,DUSP4,EREG,DNAJB9,GDF15,SESN2,IRAK2,IER3,MAP3K8,IL1A,DNAJC27,ARRDC3,RHOB,PLK2,DUSP6,CXCL3,CXCL8,EIF2AK3,DDIT4,LURAP1L,TNFRSF12A,YOD1,ATF3,PEAR1,INSIG1,SPRY4,EPHA2,OSGIN1,DUSP10,PTGS2,RGS16,CTGF,MCL1,DUSP5,GADD45A,JUN,ANKRD1,ZC3H12A,TSPYL2,ERRFI1,EDN1,XDH,VIMP,CYR61,HERPUD1,CDKN2AIP,CXCL2,MANF,UBC,FICD,DDIT3,DNAJC3,TNFAIP3,NR4A3,MAP3K14
GO:0050794	regulation of cellular process	105	10484	0.18	3.12e-09	9606.ENSP00000200453,9606.ENSP00000216037,9606.ENSP00000222803,9606.ENSP00000227752,9606.ENSP00000228437,9606.ENSP00000230990,9606.ENSP00000234420,9606.ENSP00000239223,9606.ENSP00000240100,9606.ENSP00000242480,9606.ENSP00000244869,9606.ENSP00000245919,9606.ENSP00000249356,9606.ENSP00000252809,9606.ENSP00000253063,9606.ENSP00000256458,9606.ENSP00000256495,9606.ENSP00000259874,9606.ENSP00000261845,…	PPP1R15A,XBP1,FKBP14,IL10RA,PRDM4,HBEGF,MSH6,DUSP1,DUSP4,EGR2,EREG,FOSB,DNAJB9,GDF15,SESN2,IRAK2,BHLHE40,IER3,MAPK6,MAP3K8,IL1A,MXD1,DNAJC27,ARRDC3,SIK1,RHOB,CSRNP1,EAF2,PLK2,NRBF2,DUSP6,CXCL3,CXCL8,EIF2AK3,DDIT4,FOSL1,NFKBIB,ZFAND2A,LURAP1L,SERTAD3,TNFRSF12A,YOD1,RAB12,OVOL1,ZBTB49,CCNYL1,ATF3,PEAR1,INSIG1,SPRY4,MAFF,RASSF1,CREB5,SERTAD1,EPHA2,TSC22D2,OSGIN1,DUSP10,PTGS2,RGS16,SGK1,CTGF,MCL1,DUS…
GO:1902532	negative regulation of intracellular signal transduction	21	514	0.79	3.18e-09	9606.ENSP00000216037,9606.ENSP00000239223,9606.ENSP00000240100,9606.ENSP00000253063,9606.ENSP00000265138,9606.ENSP00000279488,9606.ENSP00000307305,9606.ENSP00000344352,9606.ENSP00000344967,9606.ENSP00000351209,9606.ENSP00000355866,9606.ENSP00000356438,9606.ENSP00000358022,9606.ENSP00000358596,9606.ENSP00000362179,9606.ENSP00000366702,9606.ENSP00000368727,9606.ENSP00000381282,9606.ENSP00000409555,…	XBP1,DUSP1,DUSP4,SESN2,ARRDC3,DUSP6,DDIT4,ATF3,SPRY4,EPHA2,DUSP10,PTGS2,MCL1,DUSP5,ZC3H12A,ERRFI1,XDH,VIMP,HERPUD1,DDIT3,TNFAIP3
GO:0080134	regulation of response to stress	32	1299	0.57	5.7e-09	9606.ENSP00000200453,9606.ENSP00000216037,9606.ENSP00000230990,9606.ENSP00000244869,9606.ENSP00000249356,9606.ENSP00000253063,9606.ENSP00000256458,9606.ENSP00000259874,9606.ENSP00000274289,9606.ENSP00000307235,9606.ENSP00000326737,9606.ENSP00000326813,9606.ENSP00000344741,9606.ENSP00000355866,9606.ENSP00000356438,9606.ENSP00000356954,9606.ENSP00000358022,9606.ENSP00000360025,9606.ENSP00000360762,…	PPP1R15A,XBP1,HBEGF,EREG,DNAJB9,SESN2,IRAK2,IER3,PLK2,EIF2AK3,TNFRSF12A,YOD1,INSIG1,DUSP10,PTGS2,CTGF,MCL1,GADD45A,ANKRD1,ZC3H12A,ERRFI1,EDN1,XDH,VIMP,HERPUD1,MANF,UBC,FICD,DDIT3,DNAJC3,TNFAIP3,NR4A3
GO:0010941	regulation of cell death	36	1638	0.52	6.25e-09	9606.ENSP00000216037,9606.ENSP00000239223,9606.ENSP00000252809,9606.ENSP00000259874,9606.ENSP00000263056,9606.ENSP00000263339,9606.ENSP00000270162,9606.ENSP00000272233,9606.ENSP00000274289,9606.ENSP00000279488,9606.ENSP00000307235,9606.ENSP00000307305,9606.ENSP00000310170,9606.ENSP00000326737,9606.ENSP00000344352,9606.ENSP00000355374,9606.ENSP00000356438,9606.ENSP00000356832,9606.ENSP00000356954,…	XBP1,DUSP1,GDF15,IER3,MAP3K8,IL1A,SIK1,RHOB,PLK2,DUSP6,EIF2AK3,DDIT4,FOSL1,TNFRSF12A,ATF3,OSGIN1,PTGS2,SGK1,CTGF,MCL1,GADD45A,JUN,ANKRD1,TSC22D3,ZC3H12A,EDN1,XDH,VIMP,CYR61,HERPUD1,UBC,DDIT3,DNAJC3,TNFAIP3,NR4A3,MAP3K14
GO:0010942	positive regulation of cell death	23	663	0.72	7.08e-09	9606.ENSP00000216037,9606.ENSP00000239223,9606.ENSP00000270162,9606.ENSP00000272233,9606.ENSP00000279488,9606.ENSP00000307235,9606.ENSP00000307305,9606.ENSP00000310170,9606.ENSP00000326737,9606.ENSP00000344352,9606.ENSP00000355374,9606.ENSP00000356438,9606.ENSP00000356954,9606.ENSP00000358022,9606.ENSP00000360025,9606.ENSP00000360266,9606.ENSP00000360762,9606.ENSP00000362179,9606.ENSP00000368727,…	XBP1,DUSP1,SIK1,RHOB,DUSP6,EIF2AK3,DDIT4,FOSL1,TNFRSF12A,ATF3,OSGIN1,PTGS2,CTGF,MCL1,GADD45A,JUN,ANKRD1,ZC3H12A,XDH,CYR61,UBC,DDIT3,NR4A3
GO:0009968	negative regulation of signal transduction	30	1160	0.59	7.59e-09	9606.ENSP00000200453,9606.ENSP00000216037,9606.ENSP00000239223,9606.ENSP00000240100,9606.ENSP00000249356,9606.ENSP00000252809,9606.ENSP00000253063,9606.ENSP00000263339,9606.ENSP00000265138,9606.ENSP00000279488,9606.ENSP00000306512,9606.ENSP00000307305,9606.ENSP00000344352,9606.ENSP00000344465,9606.ENSP00000344741,9606.ENSP00000344967,9606.ENSP00000351209,9606.ENSP00000355866,9606.ENSP00000356438,…	PPP1R15A,XBP1,DUSP1,DUSP4,DNAJB9,GDF15,SESN2,IL1A,ARRDC3,DUSP6,CXCL8,DDIT4,ATF3,PEAR1,INSIG1,SPRY4,EPHA2,DUSP10,PTGS2,RGS16,MCL1,DUSP5,ZC3H12A,ERRFI1,XDH,VIMP,HERPUD1,UBC,DDIT3,TNFAIP3
GO:0043065	positive regulation of apoptotic process	22	604	0.74	7.59e-09	9606.ENSP00000216037,9606.ENSP00000239223,9606.ENSP00000270162,9606.ENSP00000272233,9606.ENSP00000279488,9606.ENSP00000307235,9606.ENSP00000310170,9606.ENSP00000326737,9606.ENSP00000344352,9606.ENSP00000355374,9606.ENSP00000356438,9606.ENSP00000356954,9606.ENSP00000358022,9606.ENSP00000360025,9606.ENSP00000360266,9606.ENSP00000360762,9606.ENSP00000362179,9606.ENSP00000368727,9606.ENSP00000398736,…	XBP1,DUSP1,SIK1,RHOB,DUSP6,EIF2AK3,FOSL1,TNFRSF12A,ATF3,OSGIN1,PTGS2,CTGF,MCL1,GADD45A,JUN,ANKRD1,ZC3H12A,XDH,CYR61,UBC,DDIT3,NR4A3
GO:0035556	intracellular signal transduction	34	1528	0.53	1.55e-08	9606.ENSP00000200453,9606.ENSP00000216037,9606.ENSP00000230990,9606.ENSP00000234420,9606.ENSP00000239223,9606.ENSP00000244869,9606.ENSP00000253063,9606.ENSP00000256458,9606.ENSP00000261845,9606.ENSP00000263056,9606.ENSP00000270162,9606.ENSP00000272233,9606.ENSP00000274289,9606.ENSP00000279488,9606.ENSP00000306512,9606.ENSP00000307235,9606.ENSP00000307305,9606.ENSP00000344465,9606.ENSP00000349547,…	PPP1R15A,XBP1,HBEGF,MSH6,DUSP1,EREG,SESN2,IRAK2,MAPK6,MAP3K8,SIK1,RHOB,PLK2,DUSP6,CXCL8,EIF2AK3,DDIT4,PEAR1,RASSF1,EPHA2,SGK1,CTGF,MCL1,DUSP5,GADD45A,JUN,RND3,EDN1,HRH1,AMOTL2,UBC,DDIT3,TNFAIP3,MAP3K14
GO:0006984	ER-nucleus signaling pathway	8	34	1.55	1.57e-08	9606.ENSP00000216037,9606.ENSP00000306512,9606.ENSP00000307235,9606.ENSP00000344352,9606.ENSP00000344741,9606.ENSP00000381282,9606.ENSP00000409555,9606.ENSP00000448665	XBP1,CXCL8,EIF2AK3,ATF3,INSIG1,VIMP,HERPUD1,DDIT3
GO:0050789	regulation of biological process	107	11116	0.16	1.62e-08	9606.ENSP00000200453,9606.ENSP00000216037,9606.ENSP00000222803,9606.ENSP00000227752,9606.ENSP00000228437,9606.ENSP00000230990,9606.ENSP00000234420,9606.ENSP00000239223,9606.ENSP00000240100,9606.ENSP00000242480,9606.ENSP00000244869,9606.ENSP00000245919,9606.ENSP00000249356,9606.ENSP00000252809,9606.ENSP00000253063,9606.ENSP00000256458,9606.ENSP00000256495,9606.ENSP00000259874,9606.ENSP00000261845,…	PPP1R15A,XBP1,FKBP14,IL10RA,PRDM4,HBEGF,MSH6,DUSP1,DUSP4,EGR2,EREG,FOSB,DNAJB9,GDF15,SESN2,IRAK2,BHLHE40,IER3,MAPK6,MAP3K8,IL1A,MXD1,DNAJC27,ARRDC3,SIK1,RHOB,CSRNP1,EAF2,PLK2,NRBF2,DUSP6,CXCL3,CXCL8,EIF2AK3,DDIT4,FOSL1,NFKBIB,ZFAND2A,LURAP1L,SERTAD3,TNFRSF12A,YOD1,RAB12,OVOL1,ZBTB49,CCNYL1,ATF3,PEAR1,INSIG1,SPRY4,MAFF,RASSF1,CREB5,SERTAD1,EPHA2,TSC22D2,OSGIN1,DUSP10,PTGS2,RGS16,SGK1,CTGF,MCL1,DUS…
GO:0043408	regulation of MAPK cascade	23	712	0.69	2.32e-08	9606.ENSP00000216037,9606.ENSP00000239223,9606.ENSP00000240100,9606.ENSP00000252809,9606.ENSP00000256458,9606.ENSP00000263056,9606.ENSP00000264711,9606.ENSP00000279488,9606.ENSP00000344352,9606.ENSP00000344967,9606.ENSP00000351209,9606.ENSP00000355866,9606.ENSP00000356954,9606.ENSP00000358596,9606.ENSP00000360025,9606.ENSP00000360266,9606.ENSP00000362179,9606.ENSP00000366702,9606.ENSP00000368683,…	XBP1,DUSP1,DUSP4,GDF15,IRAK2,MAP3K8,DNAJC27,DUSP6,ATF3,SPRY4,EPHA2,DUSP10,CTGF,DUSP5,GADD45A,JUN,ZC3H12A,ERRFI1,EDN1,XDH,CYR61,UBC,MAP3K14
GO:0031324	negative regulation of cellular metabolic process	43	2463	0.42	5.86e-08	9606.ENSP00000200453,9606.ENSP00000216037,9606.ENSP00000230990,9606.ENSP00000234420,9606.ENSP00000239223,9606.ENSP00000240100,9606.ENSP00000244869,9606.ENSP00000245919,9606.ENSP00000253063,9606.ENSP00000256495,9606.ENSP00000264444,9606.ENSP00000270162,9606.ENSP00000279488,9606.ENSP00000307235,9606.ENSP00000307305,9606.ENSP00000326813,9606.ENSP00000337862,9606.ENSP00000344352,9606.ENSP00000344741,…	PPP1R15A,XBP1,HBEGF,MSH6,DUSP1,DUSP4,EREG,FOSB,SESN2,BHLHE40,MXD1,SIK1,DUSP6,EIF2AK3,DDIT4,YOD1,OVOL1,ATF3,INSIG1,SPRY4,DUSP10,PTGS2,MCL1,DUSP5,PTBP2,GADD45A,JUN,ANKRD1,TSC22D3,ZC3H12A,TSPYL2,ERRFI1,EDN1,XDH,TDG,VIMP,HERPUD1,USP36,UBC,DDIT3,DNAJC3,TNFAIP3,NR4A3
GO:0051246	regulation of protein metabolic process	45	2668	0.41	5.88e-08	9606.ENSP00000200453,9606.ENSP00000216037,9606.ENSP00000230990,9606.ENSP00000239223,9606.ENSP00000240100,9606.ENSP00000244869,9606.ENSP00000252809,9606.ENSP00000253063,9606.ENSP00000256458,9606.ENSP00000263056,9606.ENSP00000263339,9606.ENSP00000264711,9606.ENSP00000265138,9606.ENSP00000274289,9606.ENSP00000279488,9606.ENSP00000307235,9606.ENSP00000307305,9606.ENSP00000314619,9606.ENSP00000326813,…	PPP1R15A,XBP1,HBEGF,DUSP1,DUSP4,EREG,GDF15,SESN2,IRAK2,MAP3K8,IL1A,DNAJC27,ARRDC3,PLK2,DUSP6,EIF2AK3,DDIT4,ZFAND2A,YOD1,CCNYL1,ATF3,SPRY4,RASSF1,SERTAD1,EPHA2,DUSP10,PTGS2,CTGF,DUSP5,GADD45A,JUN,LONRF3,ZC3H12A,TSPYL2,ERRFI1,EDN1,XDH,CYR61,HERPUD1,DCUN1D2,TIPARP,UBC,DNAJC3,TNFAIP3,MAP3K14
GO:0065009	regulation of molecular function	51	3322	0.37	6.77e-08	9606.ENSP00000200453,9606.ENSP00000230990,9606.ENSP00000234420,9606.ENSP00000239223,9606.ENSP00000240100,9606.ENSP00000244869,9606.ENSP00000252809,9606.ENSP00000253063,9606.ENSP00000256458,9606.ENSP00000256495,9606.ENSP00000263056,9606.ENSP00000263339,9606.ENSP00000265138,9606.ENSP00000270162,9606.ENSP00000274289,9606.ENSP00000277746,9606.ENSP00000279488,9606.ENSP00000296026,9606.ENSP00000306512,…	PPP1R15A,HBEGF,MSH6,DUSP1,DUSP4,EREG,GDF15,SESN2,IRAK2,BHLHE40,MAP3K8,IL1A,ARRDC3,SIK1,PLK2,NRBF2,DUSP6,CXCL3,CXCL8,EIF2AK3,FOSL1,CCNYL1,SERTAD1,EPHA2,OSGIN1,DUSP10,PTGS2,RGS16,SGK1,CTGF,DUSP5,GADD45A,JUN,ZC3H12A,TSPYL2,ERRFI1,EDN1,XDH,TDG,VCPKMT,CYR61,HERPUD1,DCUN1D2,CXCL2,MANF,UBC,FICD,DDIT3,DNAJC3,TNFAIP3,MAP3K14
GO:0032268	regulation of cellular protein metabolic process	43	2486	0.42	7.38e-08	9606.ENSP00000200453,9606.ENSP00000216037,9606.ENSP00000230990,9606.ENSP00000239223,9606.ENSP00000240100,9606.ENSP00000244869,9606.ENSP00000252809,9606.ENSP00000253063,9606.ENSP00000256458,9606.ENSP00000263056,9606.ENSP00000264711,9606.ENSP00000265138,9606.ENSP00000274289,9606.ENSP00000279488,9606.ENSP00000307235,9606.ENSP00000307305,9606.ENSP00000314619,9606.ENSP00000326813,9606.ENSP00000342344,…	PPP1R15A,XBP1,HBEGF,DUSP1,DUSP4,EREG,GDF15,SESN2,IRAK2,MAP3K8,DNAJC27,ARRDC3,PLK2,DUSP6,EIF2AK3,DDIT4,ZFAND2A,YOD1,CCNYL1,ATF3,SPRY4,RASSF1,SERTAD1,EPHA2,DUSP10,PTGS2,CTGF,DUSP5,GADD45A,JUN,LONRF3,ZC3H12A,TSPYL2,ERRFI1,EDN1,XDH,CYR61,HERPUD1,DCUN1D2,UBC,DNAJC3,TNFAIP3,MAP3K14
GO:0065007	biological regulation	109	11740	0.15	8.12e-08	9606.ENSP00000200453,9606.ENSP00000216037,9606.ENSP00000222803,9606.ENSP00000227752,9606.ENSP00000228437,9606.ENSP00000230990,9606.ENSP00000234420,9606.ENSP00000239223,9606.ENSP00000240100,9606.ENSP00000242480,9606.ENSP00000244869,9606.ENSP00000245919,9606.ENSP00000249356,9606.ENSP00000252809,9606.ENSP00000253063,9606.ENSP00000256458,9606.ENSP00000256495,9606.ENSP00000259874,9606.ENSP00000261845,…	PPP1R15A,XBP1,FKBP14,IL10RA,PRDM4,HBEGF,MSH6,DUSP1,DUSP4,EGR2,EREG,FOSB,DNAJB9,GDF15,SESN2,IRAK2,BHLHE40,IER3,MAPK6,MAP3K8,IL1A,MXD1,DNAJC27,ARRDC3,SIK1,RHOB,CSRNP1,EAF2,PLK2,NRBF2,DUSP6,CXCL3,CXCL8,EIF2AK3,DDIT4,FOSL1,NFKBIB,ZFAND2A,LURAP1L,SERTAD3,TNFRSF12A,YOD1,RAB12,OVOL1,ZBTB49,CCNYL1,ATF3,PEAR1,INSIG1,SPRY4,MAFF,RASSF1,CREB5,SERTAD1,EPHA2,TSC22D2,OSGIN1,DUSP10,PTGS2,RGS16,SGK1,CTGF,MCL1,DUS…
GO:0042221	response to chemical	58	4153	0.33	8.65e-08	9606.ENSP00000216037,9606.ENSP00000222803,9606.ENSP00000227752,9606.ENSP00000230990,9606.ENSP00000239223,9606.ENSP00000242480,9606.ENSP00000244869,9606.ENSP00000245919,9606.ENSP00000249356,9606.ENSP00000252809,9606.ENSP00000253063,9606.ENSP00000256458,9606.ENSP00000261845,9606.ENSP00000263056,9606.ENSP00000263339,9606.ENSP00000270162,9606.ENSP00000272233,9606.ENSP00000279488,9606.ENSP00000296026,…	XBP1,FKBP14,IL10RA,HBEGF,DUSP1,EGR2,EREG,FOSB,DNAJB9,GDF15,SESN2,IRAK2,MAPK6,MAP3K8,IL1A,SIK1,RHOB,DUSP6,CXCL3,CXCL8,EIF2AK3,DDIT4,FOSL1,NFKBIB,ZFAND2A,TNFRSF12A,YOD1,RAB12,ATF3,INSIG1,EPHA2,DUSP10,PTGS2,CTGF,MCL1,JUN,ANKRD1,SLC25A25,ZC3H12A,TSPYL2,ERRFI1,EDN1,PIGA,HRH1,VIMP,CYR61,ESRP1,HERPUD1,TIPARP,CXCL2,MANF,UBC,FICD,DDIT3,DNAJC3,TNFAIP3,NR4A3,MAP3K14
GO:0032496	response to lipopolysaccharide	15	298	0.88	1.1e-07	9606.ENSP00000216037,9606.ENSP00000227752,9606.ENSP00000256458,9606.ENSP00000296026,9606.ENSP00000306512,9606.ENSP00000312988,9606.ENSP00000355866,9606.ENSP00000356438,9606.ENSP00000360266,9606.ENSP00000360762,9606.ENSP00000362179,9606.ENSP00000368683,9606.ENSP00000381282,9606.ENSP00000427279,9606.ENSP00000481570	XBP1,IL10RA,IRAK2,CXCL3,CXCL8,NFKBIB,DUSP10,PTGS2,JUN,ANKRD1,ZC3H12A,EDN1,VIMP,CXCL2,TNFAIP3
GO:0009892	negative regulation of metabolic process	45	2762	0.39	1.58e-07	9606.ENSP00000200453,9606.ENSP00000216037,9606.ENSP00000230990,9606.ENSP00000234420,9606.ENSP00000239223,9606.ENSP00000240100,9606.ENSP00000244869,9606.ENSP00000245919,9606.ENSP00000253063,9606.ENSP00000256495,9606.ENSP00000264444,9606.ENSP00000270162,9606.ENSP00000279488,9606.ENSP00000307235,9606.ENSP00000307305,9606.ENSP00000326813,9606.ENSP00000337862,9606.ENSP00000344352,9606.ENSP00000344741,…	PPP1R15A,XBP1,HBEGF,MSH6,DUSP1,DUSP4,EREG,FOSB,SESN2,BHLHE40,MXD1,SIK1,DUSP6,EIF2AK3,DDIT4,YOD1,OVOL1,ATF3,INSIG1,SPRY4,DUSP10,PTGS2,CTGF,MCL1,DUSP5,PTBP2,GADD45A,JUN,ANKRD1,TSC22D3,ZC3H12A,TSPYL2,ERRFI1,EDN1,XDH,TDG,VIMP,HERPUD1,TIPARP,USP36,UBC,DDIT3,DNAJC3,TNFAIP3,NR4A3
GO:0033993	response to lipid	23	825	0.63	3e-07	9606.ENSP00000216037,9606.ENSP00000227752,9606.ENSP00000239223,9606.ENSP00000245919,9606.ENSP00000256458,9606.ENSP00000296026,9606.ENSP00000306512,9606.ENSP00000307305,9606.ENSP00000310170,9606.ENSP00000312988,9606.ENSP00000344741,9606.ENSP00000355866,9606.ENSP00000356438,9606.ENSP00000356954,9606.ENSP00000360266,9606.ENSP00000360762,9606.ENSP00000362179,9606.ENSP00000366702,9606.ENSP00000368683,…	XBP1,IL10RA,DUSP1,FOSB,IRAK2,CXCL3,CXCL8,DDIT4,FOSL1,NFKBIB,INSIG1,DUSP10,PTGS2,CTGF,JUN,ANKRD1,ZC3H12A,ERRFI1,EDN1,VIMP,CXCL2,TNFAIP3,NR4A3
GO:0044260	cellular macromolecule metabolic process	74	6413	0.24	4.49e-07	9606.ENSP00000200453,9606.ENSP00000216037,9606.ENSP00000222803,9606.ENSP00000228437,9606.ENSP00000230990,9606.ENSP00000234420,9606.ENSP00000239223,9606.ENSP00000240100,9606.ENSP00000242480,9606.ENSP00000244869,9606.ENSP00000245919,9606.ENSP00000249356,9606.ENSP00000253063,9606.ENSP00000256458,9606.ENSP00000256495,9606.ENSP00000261845,9606.ENSP00000263056,9606.ENSP00000264444,9606.ENSP00000270162,…	PPP1R15A,XBP1,FKBP14,PRDM4,HBEGF,MSH6,DUSP1,DUSP4,EGR2,EREG,FOSB,DNAJB9,SESN2,IRAK2,BHLHE40,MAPK6,MAP3K8,MXD1,SIK1,CSRNP1,EAF2,PLK2,NRBF2,DUSP6,CXCL8,EIF2AK3,FOSL1,FUT1,NFKBIB,SERTAD3,YOD1,RAB12,OVOL1,ZBTB49,ATF3,MAFF,CREB5,SERTAD1,EPHA2,DUSP10,SGK1,CTGF,DUSP5,GADD45A,JUN,LONRF3,ZC3H12A,ZBTB43,TSPYL2,ZNF165,PIGA,ZMYM5,TDG,VCPKMT,PDP1,VIMP,ZNF527,CYR61,NABP1,HERPUD1,DCUN1D2,KLF6,TIPARP,THUMPD2,PGM…
GO:0051247	positive regulation of protein metabolic process	32	1587	0.49	4.87e-07	9606.ENSP00000200453,9606.ENSP00000216037,9606.ENSP00000230990,9606.ENSP00000244869,9606.ENSP00000252809,9606.ENSP00000256458,9606.ENSP00000263056,9606.ENSP00000263339,9606.ENSP00000264711,9606.ENSP00000265138,9606.ENSP00000274289,9606.ENSP00000279488,9606.ENSP00000307235,9606.ENSP00000314619,9606.ENSP00000349547,9606.ENSP00000356438,9606.ENSP00000356954,9606.ENSP00000358596,9606.ENSP00000360025,…	PPP1R15A,XBP1,HBEGF,EREG,GDF15,IRAK2,MAP3K8,IL1A,DNAJC27,ARRDC3,PLK2,DUSP6,EIF2AK3,ZFAND2A,RASSF1,PTGS2,CTGF,DUSP5,GADD45A,JUN,LONRF3,ZC3H12A,EDN1,XDH,CYR61,HERPUD1,DCUN1D2,TIPARP,UBC,DNAJC3,TNFAIP3,MAP3K14
GO:0051338	regulation of transferase activity	24	964	0.58	1.07e-06	9606.ENSP00000239223,9606.ENSP00000240100,9606.ENSP00000244869,9606.ENSP00000252809,9606.ENSP00000253063,9606.ENSP00000256458,9606.ENSP00000263056,9606.ENSP00000265138,9606.ENSP00000277746,9606.ENSP00000279488,9606.ENSP00000342344,9606.ENSP00000350633,9606.ENSP00000355866,9606.ENSP00000358596,9606.ENSP00000360025,9606.ENSP00000364591,9606.ENSP00000366702,9606.ENSP00000368683,9606.ENSP00000398736,…	DUSP1,DUSP4,EREG,GDF15,SESN2,IRAK2,MAP3K8,ARRDC3,NRBF2,DUSP6,CCNYL1,SERTAD1,DUSP10,DUSP5,GADD45A,TSPYL2,ERRFI1,EDN1,CYR61,DCUN1D2,UBC,DNAJC3,TNFAIP3,MAP3K14
GO:0009889	regulation of biosynthetic process	57	4337	0.3	1.15e-06	9606.ENSP00000200453,9606.ENSP00000216037,9606.ENSP00000228437,9606.ENSP00000230990,9606.ENSP00000239223,9606.ENSP00000242480,9606.ENSP00000244869,9606.ENSP00000245919,9606.ENSP00000252809,9606.ENSP00000253063,9606.ENSP00000256458,9606.ENSP00000256495,9606.ENSP00000263339,9606.ENSP00000264444,9606.ENSP00000270162,9606.ENSP00000273153,9606.ENSP00000273668,9606.ENSP00000277746,9606.ENSP00000307235,…	PPP1R15A,XBP1,PRDM4,HBEGF,DUSP1,EGR2,EREG,FOSB,GDF15,SESN2,IRAK2,BHLHE40,IL1A,MXD1,SIK1,CSRNP1,EAF2,NRBF2,EIF2AK3,DDIT4,FOSL1,NFKBIB,SERTAD3,OVOL1,ZBTB49,ATF3,INSIG1,MAFF,CREB5,SERTAD1,TSC22D2,PTGS2,SGK1,CTGF,JUN,ANKRD1,TSC22D3,ZC3H12A,ZBTB43,TSPYL2,ZNF165,ERRFI1,EDN1,ZMYM5,TDG,PDP1,HRH1,VIMP,ZNF527,CYR61,KLF6,UBC,DDIT3,ZNF699,DNAJC3,TNFAIP3,NR4A3
GO:0051726	regulation of cell cycle	26	1129	0.54	1.15e-06	9606.ENSP00000200453,9606.ENSP00000239223,9606.ENSP00000244869,9606.ENSP00000263056,9606.ENSP00000263339,9606.ENSP00000270162,9606.ENSP00000272233,9606.ENSP00000274289,9606.ENSP00000306512,9606.ENSP00000310170,9606.ENSP00000337862,9606.ENSP00000338807,9606.ENSP00000342344,9606.ENSP00000349547,9606.ENSP00000350633,9606.ENSP00000356438,9606.ENSP00000356954,9606.ENSP00000360025,9606.ENSP00000360266,…	PPP1R15A,DUSP1,EREG,MAP3K8,IL1A,SIK1,RHOB,PLK2,CXCL8,FOSL1,OVOL1,ZBTB49,CCNYL1,RASSF1,SERTAD1,PTGS2,CTGF,GADD45A,JUN,TSPYL2,EDN1,NABP1,DDIT3,TNFAIP3,NR4A3,MAP3K14
GO:0070373	negative regulation of ERK1 and ERK2 cascade	8	65	1.27	1.15e-06	9606.ENSP00000216037,9606.ENSP00000239223,9606.ENSP00000240100,9606.ENSP00000279488,9606.ENSP00000344352,9606.ENSP00000344967,9606.ENSP00000355866,9606.ENSP00000366702	XBP1,DUSP1,DUSP4,DUSP6,ATF3,SPRY4,DUSP10,ERRFI1
GO:0001933	negative regulation of protein phosphorylation	16	422	0.76	1.26e-06	9606.ENSP00000216037,9606.ENSP00000239223,9606.ENSP00000240100,9606.ENSP00000279488,9606.ENSP00000307305,9606.ENSP00000344352,9606.ENSP00000344967,9606.ENSP00000355866,9606.ENSP00000358596,9606.ENSP00000360025,9606.ENSP00000360266,9606.ENSP00000362179,9606.ENSP00000366702,9606.ENSP00000368727,9606.ENSP00000473631,9606.ENSP00000481570	XBP1,DUSP1,DUSP4,DUSP6,DDIT4,ATF3,SPRY4,DUSP10,DUSP5,GADD45A,JUN,ZC3H12A,ERRFI1,XDH,DNAJC3,TNFAIP3
GO:0001944	vasculature development	17	487	0.72	1.42e-06	9606.ENSP00000216037,9606.ENSP00000244869,9606.ENSP00000272233,9606.ENSP00000306512,9606.ENSP00000307235,9606.ENSP00000310170,9606.ENSP00000326737,9606.ENSP00000351209,9606.ENSP00000356438,9606.ENSP00000356954,9606.ENSP00000360266,9606.ENSP00000362179,9606.ENSP00000366702,9606.ENSP00000368683,9606.ENSP00000398736,9606.ENSP00000420612,9606.ENSP00000448665	XBP1,EREG,RHOB,CXCL8,EIF2AK3,FOSL1,TNFRSF12A,EPHA2,PTGS2,CTGF,JUN,ZC3H12A,ERRFI1,EDN1,CYR61,TIPARP,DDIT3
GO:0010605	negative regulation of macromolecule metabolic process	41	2558	0.39	1.44e-06	9606.ENSP00000200453,9606.ENSP00000216037,9606.ENSP00000230990,9606.ENSP00000234420,9606.ENSP00000239223,9606.ENSP00000240100,9606.ENSP00000244869,9606.ENSP00000245919,9606.ENSP00000253063,9606.ENSP00000256495,9606.ENSP00000264444,9606.ENSP00000279488,9606.ENSP00000307235,9606.ENSP00000307305,9606.ENSP00000326813,9606.ENSP00000337862,9606.ENSP00000344352,9606.ENSP00000344967,9606.ENSP00000355866,…	PPP1R15A,XBP1,HBEGF,MSH6,DUSP1,DUSP4,EREG,FOSB,SESN2,BHLHE40,MXD1,DUSP6,EIF2AK3,DDIT4,YOD1,OVOL1,ATF3,SPRY4,DUSP10,PTGS2,CTGF,DUSP5,PTBP2,GADD45A,JUN,ANKRD1,TSC22D3,ZC3H12A,TSPYL2,ERRFI1,EDN1,XDH,TDG,VIMP,HERPUD1,TIPARP,UBC,DDIT3,DNAJC3,TNFAIP3,NR4A3
GO:0050790	regulation of catalytic activity	38	2249	0.41	1.44e-06	9606.ENSP00000200453,9606.ENSP00000234420,9606.ENSP00000239223,9606.ENSP00000240100,9606.ENSP00000244869,9606.ENSP00000252809,9606.ENSP00000253063,9606.ENSP00000256458,9606.ENSP00000263056,9606.ENSP00000265138,9606.ENSP00000277746,9606.ENSP00000279488,9606.ENSP00000307235,9606.ENSP00000342344,9606.ENSP00000350633,9606.ENSP00000351209,9606.ENSP00000355866,9606.ENSP00000356438,9606.ENSP00000356529,…	PPP1R15A,MSH6,DUSP1,DUSP4,EREG,GDF15,SESN2,IRAK2,MAP3K8,ARRDC3,NRBF2,DUSP6,EIF2AK3,CCNYL1,SERTAD1,EPHA2,DUSP10,PTGS2,RGS16,SGK1,CTGF,DUSP5,GADD45A,JUN,TSPYL2,ERRFI1,EDN1,XDH,TDG,VCPKMT,CYR61,HERPUD1,DCUN1D2,UBC,FICD,DNAJC3,TNFAIP3,MAP3K14
GO:0032270	positive regulation of cellular protein metabolic process	30	1496	0.48	1.56e-06	9606.ENSP00000200453,9606.ENSP00000216037,9606.ENSP00000230990,9606.ENSP00000244869,9606.ENSP00000252809,9606.ENSP00000256458,9606.ENSP00000263056,9606.ENSP00000264711,9606.ENSP00000265138,9606.ENSP00000274289,9606.ENSP00000279488,9606.ENSP00000307235,9606.ENSP00000314619,9606.ENSP00000349547,9606.ENSP00000356438,9606.ENSP00000356954,9606.ENSP00000358596,9606.ENSP00000360025,9606.ENSP00000360266,…	PPP1R15A,XBP1,HBEGF,EREG,GDF15,IRAK2,MAP3K8,DNAJC27,ARRDC3,PLK2,DUSP6,EIF2AK3,ZFAND2A,RASSF1,PTGS2,CTGF,DUSP5,GADD45A,JUN,LONRF3,ZC3H12A,EDN1,XDH,CYR61,HERPUD1,DCUN1D2,UBC,DNAJC3,TNFAIP3,MAP3K14
GO:0031326	regulation of cellular biosynthetic process	56	4266	0.3	1.58e-06	9606.ENSP00000200453,9606.ENSP00000216037,9606.ENSP00000228437,9606.ENSP00000230990,9606.ENSP00000239223,9606.ENSP00000242480,9606.ENSP00000244869,9606.ENSP00000245919,9606.ENSP00000252809,9606.ENSP00000253063,9606.ENSP00000256458,9606.ENSP00000256495,9606.ENSP00000263339,9606.ENSP00000264444,9606.ENSP00000270162,9606.ENSP00000273153,9606.ENSP00000273668,9606.ENSP00000277746,9606.ENSP00000307235,…	PPP1R15A,XBP1,PRDM4,HBEGF,DUSP1,EGR2,EREG,FOSB,GDF15,SESN2,IRAK2,BHLHE40,IL1A,MXD1,SIK1,CSRNP1,EAF2,NRBF2,EIF2AK3,DDIT4,FOSL1,NFKBIB,SERTAD3,OVOL1,ZBTB49,ATF3,INSIG1,MAFF,CREB5,SERTAD1,TSC22D2,PTGS2,SGK1,JUN,ANKRD1,TSC22D3,ZC3H12A,ZBTB43,TSPYL2,ZNF165,ERRFI1,EDN1,ZMYM5,TDG,PDP1,HRH1,VIMP,ZNF527,CYR61,KLF6,UBC,DDIT3,ZNF699,DNAJC3,TNFAIP3,NR4A3
GO:1903573	negative regulation of response to endoplasmic reticulum stress	7	44	1.38	1.59e-06	9606.ENSP00000200453,9606.ENSP00000216037,9606.ENSP00000249356,9606.ENSP00000326813,9606.ENSP00000381282,9606.ENSP00000409555,9606.ENSP00000473631	PPP1R15A,XBP1,DNAJB9,YOD1,VIMP,HERPUD1,DNAJC3
GO:0051716	cellular response to stimulus	71	6212	0.24	1.7e-06	9606.ENSP00000200453,9606.ENSP00000216037,9606.ENSP00000222803,9606.ENSP00000227752,9606.ENSP00000228437,9606.ENSP00000230990,9606.ENSP00000234420,9606.ENSP00000239223,9606.ENSP00000242480,9606.ENSP00000244869,9606.ENSP00000245919,9606.ENSP00000249356,9606.ENSP00000252809,9606.ENSP00000253063,9606.ENSP00000256458,9606.ENSP00000261845,9606.ENSP00000263056,9606.ENSP00000263339,9606.ENSP00000270162,…	PPP1R15A,XBP1,FKBP14,IL10RA,PRDM4,HBEGF,MSH6,DUSP1,EGR2,EREG,FOSB,DNAJB9,GDF15,SESN2,IRAK2,MAPK6,MAP3K8,IL1A,SIK1,RHOB,CSRNP1,PLK2,NRBF2,DUSP6,CXCL3,CXCL8,EIF2AK3,DDIT4,FOSL1,NFKBIB,ZFAND2A,TNFRSF12A,YOD1,RAB12,ATF3,PEAR1,INSIG1,RASSF1,EPHA2,PTGS2,RGS16,SGK1,CTGF,MCL1,DUSP5,GADD45A,JUN,ANKRD1,ZC3H12A,TSPYL2,RND3,ERRFI1,EDN1,PIGA,TDG,HRH1,VIMP,NABP1,ESRP1,HERPUD1,TIPARP,AMOTL2,CDKN2AIP,CXCL2,UBC,F…
GO:0043549	regulation of kinase activity	22	849	0.59	1.9e-06	9606.ENSP00000239223,9606.ENSP00000240100,9606.ENSP00000244869,9606.ENSP00000252809,9606.ENSP00000253063,9606.ENSP00000256458,9606.ENSP00000263056,9606.ENSP00000277746,9606.ENSP00000279488,9606.ENSP00000342344,9606.ENSP00000350633,9606.ENSP00000355866,9606.ENSP00000358596,9606.ENSP00000360025,9606.ENSP00000364591,9606.ENSP00000366702,9606.ENSP00000368683,9606.ENSP00000398736,9606.ENSP00000441543,…	DUSP1,DUSP4,EREG,GDF15,SESN2,IRAK2,MAP3K8,NRBF2,DUSP6,CCNYL1,SERTAD1,DUSP10,DUSP5,GADD45A,TSPYL2,ERRFI1,EDN1,CYR61,UBC,DNAJC3,TNFAIP3,MAP3K14
GO:0070372	regulation of ERK1 and ERK2 cascade	13	274	0.86	2e-06	9606.ENSP00000216037,9606.ENSP00000239223,9606.ENSP00000240100,9606.ENSP00000264711,9606.ENSP00000279488,9606.ENSP00000344352,9606.ENSP00000344967,9606.ENSP00000351209,9606.ENSP00000355866,9606.ENSP00000356954,9606.ENSP00000360266,9606.ENSP00000366702,9606.ENSP00000398736	XBP1,DUSP1,DUSP4,DNAJC27,DUSP6,ATF3,SPRY4,EPHA2,DUSP10,CTGF,JUN,ERRFI1,CYR61
GO:0036499	PERK-mediated unfolded protein response	5	12	1.8	2.41e-06	9606.ENSP00000306512,9606.ENSP00000307235,9606.ENSP00000344352,9606.ENSP00000409555,9606.ENSP00000448665	CXCL8,EIF2AK3,ATF3,HERPUD1,DDIT3
GO:0045859	regulation of protein kinase activity	21	788	0.61	2.42e-06	9606.ENSP00000239223,9606.ENSP00000240100,9606.ENSP00000244869,9606.ENSP00000252809,9606.ENSP00000253063,9606.ENSP00000256458,9606.ENSP00000263056,9606.ENSP00000279488,9606.ENSP00000342344,9606.ENSP00000350633,9606.ENSP00000355866,9606.ENSP00000358596,9606.ENSP00000360025,9606.ENSP00000364591,9606.ENSP00000366702,9606.ENSP00000368683,9606.ENSP00000398736,9606.ENSP00000441543,9606.ENSP00000473631,…	DUSP1,DUSP4,EREG,GDF15,SESN2,IRAK2,MAP3K8,DUSP6,CCNYL1,SERTAD1,DUSP10,DUSP5,GADD45A,TSPYL2,ERRFI1,EDN1,CYR61,UBC,DNAJC3,TNFAIP3,MAP3K14
GO:0051172	negative regulation of nitrogen compound metabolic process	38	2307	0.4	2.43e-06	9606.ENSP00000200453,9606.ENSP00000216037,9606.ENSP00000230990,9606.ENSP00000234420,9606.ENSP00000239223,9606.ENSP00000240100,9606.ENSP00000244869,9606.ENSP00000245919,9606.ENSP00000253063,9606.ENSP00000256495,9606.ENSP00000264444,9606.ENSP00000279488,9606.ENSP00000307235,9606.ENSP00000307305,9606.ENSP00000326813,9606.ENSP00000337862,9606.ENSP00000344352,9606.ENSP00000344967,9606.ENSP00000355866,…	PPP1R15A,XBP1,HBEGF,MSH6,DUSP1,DUSP4,EREG,FOSB,SESN2,BHLHE40,MXD1,DUSP6,EIF2AK3,DDIT4,YOD1,OVOL1,ATF3,SPRY4,DUSP10,PTGS2,DUSP5,PTBP2,GADD45A,JUN,ANKRD1,TSC22D3,ZC3H12A,TSPYL2,ERRFI1,EDN1,XDH,TDG,HERPUD1,UBC,DDIT3,DNAJC3,TNFAIP3,NR4A3
GO:0044237	cellular metabolic process	88	8797	0.18	3.25e-06	9606.ENSP00000075120,9606.ENSP00000200453,9606.ENSP00000216037,9606.ENSP00000222803,9606.ENSP00000228437,9606.ENSP00000230990,9606.ENSP00000234420,9606.ENSP00000239223,9606.ENSP00000240100,9606.ENSP00000242480,9606.ENSP00000244869,9606.ENSP00000245919,9606.ENSP00000249356,9606.ENSP00000253063,9606.ENSP00000256458,9606.ENSP00000256495,9606.ENSP00000261845,9606.ENSP00000263056,9606.ENSP00000263960,…	SLC2A3,PPP1R15A,XBP1,FKBP14,PRDM4,HBEGF,MSH6,DUSP1,DUSP4,EGR2,EREG,FOSB,DNAJB9,SESN2,IRAK2,BHLHE40,MAPK6,MAP3K8,COQ10B,MXD1,SIK1,CSRNP1,EAF2,PLK2,NRBF2,ZC3H12C,DUSP6,CXCL8,EIF2AK3,DDIT4,FOSL1,FUT1,NFKBIB,SERTAD3,YOD1,RAB12,OVOL1,ZBTB49,ATF3,INSIG1,MAFF,CREB5,SERTAD1,EPHA2,DUSP10,PTGS2,SGK1,UAP1,CTGF,DUSP5,PTBP2,GADD45A,JUN,LONRF3,YRDC,SLC25A25,ZC3H12A,ZBTB43,TSPYL2,ZNF165,GPCPD1,EDN1,XDH,PIGA,ZMY…
GO:0001568	blood vessel development	16	464	0.72	3.6e-06	9606.ENSP00000216037,9606.ENSP00000244869,9606.ENSP00000272233,9606.ENSP00000306512,9606.ENSP00000307235,9606.ENSP00000310170,9606.ENSP00000326737,9606.ENSP00000351209,9606.ENSP00000356438,9606.ENSP00000356954,9606.ENSP00000360266,9606.ENSP00000362179,9606.ENSP00000368683,9606.ENSP00000398736,9606.ENSP00000420612,9606.ENSP00000448665	XBP1,EREG,RHOB,CXCL8,EIF2AK3,FOSL1,TNFRSF12A,EPHA2,PTGS2,CTGF,JUN,ZC3H12A,EDN1,CYR61,TIPARP,DDIT3
GO:0009605	response to external stimulus	36	2152	0.4	3.98e-06	9606.ENSP00000216037,9606.ENSP00000227752,9606.ENSP00000230990,9606.ENSP00000242480,9606.ENSP00000245919,9606.ENSP00000252809,9606.ENSP00000253063,9606.ENSP00000256458,9606.ENSP00000256495,9606.ENSP00000270162,9606.ENSP00000296026,9606.ENSP00000306512,9606.ENSP00000307235,9606.ENSP00000307305,9606.ENSP00000310170,9606.ENSP00000312988,9606.ENSP00000331748,9606.ENSP00000344352,9606.ENSP00000351209,…	XBP1,IL10RA,HBEGF,EGR2,FOSB,GDF15,SESN2,IRAK2,BHLHE40,SIK1,CXCL3,CXCL8,EIF2AK3,DDIT4,FOSL1,NFKBIB,RAB12,ATF3,EPHA2,DUSP10,PTGS2,GADD45A,JUN,ANKRD1,SLC25A25,ZC3H12A,EDN1,HRH1,VIMP,CYR61,CXCL2,DDIT3,DNAJC3,TNFAIP3,NR4A3,MAP3K14
GO:0009628	response to abiotic stimulus	24	1052	0.54	3.99e-06	9606.ENSP00000234420,9606.ENSP00000239223,9606.ENSP00000245919,9606.ENSP00000256495,9606.ENSP00000263339,9606.ENSP00000270162,9606.ENSP00000272233,9606.ENSP00000307235,9606.ENSP00000307305,9606.ENSP00000310170,9606.ENSP00000354543,9606.ENSP00000356438,9606.ENSP00000356954,9606.ENSP00000360025,9606.ENSP00000360266,9606.ENSP00000360762,9606.ENSP00000361458,9606.ENSP00000366702,9606.ENSP00000368683,…	MSH6,DUSP1,FOSB,BHLHE40,IL1A,SIK1,RHOB,EIF2AK3,DDIT4,FOSL1,TSC22D2,PTGS2,CTGF,GADD45A,JUN,ANKRD1,TSC22D3,ERRFI1,EDN1,HRH1,NABP1,UBC,DNAJC3,MAP3K14
GO:0001525	angiogenesis	13	297	0.82	4.41e-06	9606.ENSP00000216037,9606.ENSP00000244869,9606.ENSP00000272233,9606.ENSP00000306512,9606.ENSP00000307235,9606.ENSP00000326737,9606.ENSP00000351209,9606.ENSP00000356438,9606.ENSP00000356954,9606.ENSP00000360266,9606.ENSP00000362179,9606.ENSP00000368683,9606.ENSP00000398736	XBP1,EREG,RHOB,CXCL8,EIF2AK3,TNFRSF12A,EPHA2,PTGS2,CTGF,JUN,ZC3H12A,EDN1,CYR61
GO:0009891	positive regulation of biosynthetic process	33	1876	0.43	4.91e-06	9606.ENSP00000200453,9606.ENSP00000216037,9606.ENSP00000228437,9606.ENSP00000242480,9606.ENSP00000244869,9606.ENSP00000245919,9606.ENSP00000253063,9606.ENSP00000263339,9606.ENSP00000273153,9606.ENSP00000273668,9606.ENSP00000307235,9606.ENSP00000310170,9606.ENSP00000312988,9606.ENSP00000325414,9606.ENSP00000338807,9606.ENSP00000344352,9606.ENSP00000344741,9606.ENSP00000345393,9606.ENSP00000350359,…	PPP1R15A,XBP1,PRDM4,EGR2,EREG,FOSB,SESN2,IL1A,CSRNP1,EAF2,EIF2AK3,FOSL1,NFKBIB,SERTAD3,ZBTB49,ATF3,INSIG1,MAFF,CREB5,SERTAD1,PTGS2,CTGF,JUN,ANKRD1,ZC3H12A,EDN1,HRH1,CYR61,KLF6,UBC,DDIT3,DNAJC3,NR4A3
GO:0051248	negative regulation of protein metabolic process	24	1075	0.53	5.7e-06	9606.ENSP00000200453,9606.ENSP00000216037,9606.ENSP00000230990,9606.ENSP00000239223,9606.ENSP00000240100,9606.ENSP00000253063,9606.ENSP00000279488,9606.ENSP00000307235,9606.ENSP00000307305,9606.ENSP00000326813,9606.ENSP00000344352,9606.ENSP00000344967,9606.ENSP00000355866,9606.ENSP00000356438,9606.ENSP00000358596,9606.ENSP00000360025,9606.ENSP00000360266,9606.ENSP00000362179,9606.ENSP00000366702,…	PPP1R15A,XBP1,HBEGF,DUSP1,DUSP4,SESN2,DUSP6,EIF2AK3,DDIT4,YOD1,ATF3,SPRY4,DUSP10,PTGS2,DUSP5,GADD45A,JUN,ZC3H12A,ERRFI1,EDN1,XDH,HERPUD1,DNAJC3,TNFAIP3
GO:0071900	regulation of protein serine/threonine kinase activity	16	488	0.7	6.52e-06	9606.ENSP00000239223,9606.ENSP00000240100,9606.ENSP00000252809,9606.ENSP00000253063,9606.ENSP00000256458,9606.ENSP00000263056,9606.ENSP00000279488,9606.ENSP00000342344,9606.ENSP00000350633,9606.ENSP00000355866,9606.ENSP00000358596,9606.ENSP00000360025,9606.ENSP00000368683,9606.ENSP00000441543,9606.ENSP00000481570,9606.ENSP00000482657	DUSP1,DUSP4,GDF15,SESN2,IRAK2,MAP3K8,DUSP6,CCNYL1,SERTAD1,DUSP10,DUSP5,GADD45A,EDN1,UBC,TNFAIP3,MAP3K14
GO:0035970	peptidyl-threonine dephosphorylation	5	16	1.68	6.76e-06	9606.ENSP00000239223,9606.ENSP00000240100,9606.ENSP00000355866,9606.ENSP00000358596,9606.ENSP00000379503	DUSP1,DUSP4,DUSP10,DUSP5,PDP1
GO:0007165	signal transduction	58	4738	0.27	7.6e-06	9606.ENSP00000200453,9606.ENSP00000216037,9606.ENSP00000222803,9606.ENSP00000227752,9606.ENSP00000228437,9606.ENSP00000230990,9606.ENSP00000234420,9606.ENSP00000239223,9606.ENSP00000244869,9606.ENSP00000249356,9606.ENSP00000252809,9606.ENSP00000253063,9606.ENSP00000256458,9606.ENSP00000261845,9606.ENSP00000263056,9606.ENSP00000263339,9606.ENSP00000270162,9606.ENSP00000272233,9606.ENSP00000273153,…	PPP1R15A,XBP1,FKBP14,IL10RA,PRDM4,HBEGF,MSH6,DUSP1,EREG,DNAJB9,GDF15,SESN2,IRAK2,MAPK6,MAP3K8,IL1A,SIK1,RHOB,CSRNP1,PLK2,DUSP6,CXCL3,CXCL8,EIF2AK3,DDIT4,NFKBIB,TNFRSF12A,YOD1,ATF3,PEAR1,INSIG1,RASSF1,EPHA2,PTGS2,RGS16,SGK1,CTGF,MCL1,DUSP5,GADD45A,JUN,ZC3H12A,TSPYL2,RND3,EDN1,HRH1,VIMP,ESRP1,HERPUD1,TIPARP,AMOTL2,CXCL2,UBC,DDIT3,DNAJC3,TNFAIP3,NR4A3,MAP3K14
GO:0045936	negative regulation of phosphate metabolic process	17	562	0.66	7.71e-06	9606.ENSP00000200453,9606.ENSP00000216037,9606.ENSP00000239223,9606.ENSP00000240100,9606.ENSP00000279488,9606.ENSP00000307305,9606.ENSP00000344352,9606.ENSP00000344967,9606.ENSP00000355866,9606.ENSP00000358596,9606.ENSP00000360025,9606.ENSP00000360266,9606.ENSP00000362179,9606.ENSP00000366702,9606.ENSP00000368727,9606.ENSP00000473631,9606.ENSP00000481570	PPP1R15A,XBP1,DUSP1,DUSP4,DUSP6,DDIT4,ATF3,SPRY4,DUSP10,DUSP5,GADD45A,JUN,ZC3H12A,ERRFI1,XDH,DNAJC3,TNFAIP3
GO:0032269	negative regulation of cellular protein metabolic process	23	1014	0.54	7.73e-06	9606.ENSP00000200453,9606.ENSP00000216037,9606.ENSP00000239223,9606.ENSP00000240100,9606.ENSP00000253063,9606.ENSP00000279488,9606.ENSP00000307235,9606.ENSP00000307305,9606.ENSP00000326813,9606.ENSP00000344352,9606.ENSP00000344967,9606.ENSP00000355866,9606.ENSP00000356438,9606.ENSP00000358596,9606.ENSP00000360025,9606.ENSP00000360266,9606.ENSP00000362179,9606.ENSP00000366702,9606.ENSP00000368683,…	PPP1R15A,XBP1,DUSP1,DUSP4,SESN2,DUSP6,EIF2AK3,DDIT4,YOD1,ATF3,SPRY4,DUSP10,PTGS2,DUSP5,GADD45A,JUN,ZC3H12A,ERRFI1,EDN1,XDH,HERPUD1,DNAJC3,TNFAIP3
GO:0043170	macromolecule metabolic process	78	7453	0.2	7.73e-06	9606.ENSP00000200453,9606.ENSP00000216037,9606.ENSP00000222803,9606.ENSP00000228437,9606.ENSP00000230990,9606.ENSP00000234420,9606.ENSP00000239223,9606.ENSP00000240100,9606.ENSP00000242480,9606.ENSP00000244869,9606.ENSP00000245919,9606.ENSP00000249356,9606.ENSP00000253063,9606.ENSP00000256458,9606.ENSP00000256495,9606.ENSP00000261845,9606.ENSP00000263056,9606.ENSP00000264444,9606.ENSP00000270162,…	PPP1R15A,XBP1,FKBP14,PRDM4,HBEGF,MSH6,DUSP1,DUSP4,EGR2,EREG,FOSB,DNAJB9,SESN2,IRAK2,BHLHE40,MAPK6,MAP3K8,MXD1,SIK1,CSRNP1,EAF2,PLK2,NRBF2,ZC3H12C,DUSP6,CXCL8,EIF2AK3,FOSL1,FUT1,NFKBIB,SERTAD3,YOD1,RAB12,OVOL1,ZBTB49,ATF3,MAFF,CREB5,SERTAD1,EPHA2,DUSP10,SGK1,CTGF,DUSP5,PTBP2,GADD45A,JUN,LONRF3,YRDC,ZC3H12A,ZBTB43,TSPYL2,ZNF165,PIGA,ZMYM5,TDG,VCPKMT,PDP1,VIMP,ZNF527,CYR61,NABP1,ESRP1,HERPUD1,DCUN1D…
GO:0019219	regulation of nucleobase-containing compound metabolic process	53	4133	0.29	7.97e-06	9606.ENSP00000216037,9606.ENSP00000228437,9606.ENSP00000234420,9606.ENSP00000239223,9606.ENSP00000242480,9606.ENSP00000244869,9606.ENSP00000245919,9606.ENSP00000252809,9606.ENSP00000253063,9606.ENSP00000256458,9606.ENSP00000256495,9606.ENSP00000263339,9606.ENSP00000264444,9606.ENSP00000270162,9606.ENSP00000273153,9606.ENSP00000273668,9606.ENSP00000277746,9606.ENSP00000307235,9606.ENSP00000307305,…	XBP1,PRDM4,MSH6,DUSP1,EGR2,EREG,FOSB,GDF15,SESN2,IRAK2,BHLHE40,IL1A,MXD1,SIK1,CSRNP1,EAF2,NRBF2,EIF2AK3,DDIT4,FOSL1,NFKBIB,SERTAD3,OVOL1,ZBTB49,ATF3,INSIG1,MAFF,CREB5,SERTAD1,TSC22D2,SGK1,PTBP2,JUN,ANKRD1,TSC22D3,ZC3H12A,ZBTB43,TSPYL2,ZNF165,EDN1,ZMYM5,TDG,PDP1,ZNF527,CYR61,ESRP1,KLF6,USP36,UBC,DDIT3,ZNF699,TNFAIP3,NR4A3
GO:0048514	blood vessel morphogenesis	14	381	0.75	9.84e-06	9606.ENSP00000216037,9606.ENSP00000244869,9606.ENSP00000272233,9606.ENSP00000306512,9606.ENSP00000307235,9606.ENSP00000326737,9606.ENSP00000351209,9606.ENSP00000356438,9606.ENSP00000356954,9606.ENSP00000360266,9606.ENSP00000362179,9606.ENSP00000368683,9606.ENSP00000398736,9606.ENSP00000420612	XBP1,EREG,RHOB,CXCL8,EIF2AK3,TNFRSF12A,EPHA2,PTGS2,CTGF,JUN,ZC3H12A,EDN1,CYR61,TIPARP
GO:0031328	positive regulation of cellular biosynthetic process	32	1846	0.42	9.88e-06	9606.ENSP00000200453,9606.ENSP00000216037,9606.ENSP00000228437,9606.ENSP00000242480,9606.ENSP00000244869,9606.ENSP00000245919,9606.ENSP00000253063,9606.ENSP00000263339,9606.ENSP00000273153,9606.ENSP00000273668,9606.ENSP00000307235,9606.ENSP00000310170,9606.ENSP00000312988,9606.ENSP00000325414,9606.ENSP00000338807,9606.ENSP00000344352,9606.ENSP00000344741,9606.ENSP00000345393,9606.ENSP00000350359,…	PPP1R15A,XBP1,PRDM4,EGR2,EREG,FOSB,SESN2,IL1A,CSRNP1,EAF2,EIF2AK3,FOSL1,NFKBIB,SERTAD3,ZBTB49,ATF3,INSIG1,MAFF,CREB5,SERTAD1,PTGS2,JUN,ANKRD1,ZC3H12A,EDN1,HRH1,CYR61,KLF6,UBC,DDIT3,DNAJC3,NR4A3
GO:0048584	positive regulation of response to stimulus	34	2054	0.4	1.1e-05	9606.ENSP00000200453,9606.ENSP00000216037,9606.ENSP00000230990,9606.ENSP00000234420,9606.ENSP00000244869,9606.ENSP00000252809,9606.ENSP00000256458,9606.ENSP00000263056,9606.ENSP00000264711,9606.ENSP00000279488,9606.ENSP00000296026,9606.ENSP00000306512,9606.ENSP00000321026,9606.ENSP00000326737,9606.ENSP00000344352,9606.ENSP00000356438,9606.ENSP00000356954,9606.ENSP00000358022,9606.ENSP00000358596,…	PPP1R15A,XBP1,HBEGF,MSH6,EREG,GDF15,IRAK2,MAP3K8,DNAJC27,DUSP6,CXCL3,CXCL8,LURAP1L,TNFRSF12A,ATF3,PTGS2,CTGF,MCL1,DUSP5,GADD45A,JUN,ANKRD1,ZC3H12A,EDN1,XDH,CYR61,HERPUD1,CDKN2AIP,CXCL2,UBC,DDIT3,TNFAIP3,NR4A3,MAP3K14
GO:0050896	response to stimulus	80	7824	0.19	1.17e-05	9606.ENSP00000075120,9606.ENSP00000200453,9606.ENSP00000216037,9606.ENSP00000222803,9606.ENSP00000227752,9606.ENSP00000228437,9606.ENSP00000230990,9606.ENSP00000234420,9606.ENSP00000239223,9606.ENSP00000242480,9606.ENSP00000244869,9606.ENSP00000245919,9606.ENSP00000249356,9606.ENSP00000252809,9606.ENSP00000253063,9606.ENSP00000256458,9606.ENSP00000256495,9606.ENSP00000261845,9606.ENSP00000263056,…	SLC2A3,PPP1R15A,XBP1,FKBP14,IL10RA,PRDM4,HBEGF,MSH6,DUSP1,EGR2,EREG,FOSB,DNAJB9,GDF15,SESN2,IRAK2,BHLHE40,MAPK6,MAP3K8,IL1A,SIK1,RHOB,CSRNP1,PLK2,NRBF2,DUSP6,CXCL3,CXCL8,EIF2AK3,DDIT4,FOSL1,NFKBIB,ZFAND2A,TNFRSF12A,YOD1,RAB12,ATF3,PEAR1,INSIG1,MAFF,RASSF1,EPHA2,TSC22D2,DUSP10,PTGS2,RGS16,SGK1,CTGF,MCL1,DUSP5,GADD45A,JUN,ANKRD1,TSC22D3,SLC25A25,ZC3H12A,TSPYL2,RND3,ERRFI1,EDN1,PIGA,TDG,HRH1,VIMP,CY…
GO:0071216	cellular response to biotic stimulus	10	176	0.94	1.2e-05	9606.ENSP00000216037,9606.ENSP00000256458,9606.ENSP00000306512,9606.ENSP00000307235,9606.ENSP00000312988,9606.ENSP00000360762,9606.ENSP00000362179,9606.ENSP00000381282,9606.ENSP00000448665,9606.ENSP00000481570	XBP1,IRAK2,CXCL8,EIF2AK3,NFKBIB,ANKRD1,ZC3H12A,VIMP,DDIT3,TNFAIP3
GO:0031400	negative regulation of protein modification process	17	592	0.64	1.41e-05	9606.ENSP00000200453,9606.ENSP00000216037,9606.ENSP00000239223,9606.ENSP00000240100,9606.ENSP00000279488,9606.ENSP00000307305,9606.ENSP00000344352,9606.ENSP00000344967,9606.ENSP00000355866,9606.ENSP00000358596,9606.ENSP00000360025,9606.ENSP00000360266,9606.ENSP00000362179,9606.ENSP00000366702,9606.ENSP00000368727,9606.ENSP00000473631,9606.ENSP00000481570	PPP1R15A,XBP1,DUSP1,DUSP4,DUSP6,DDIT4,ATF3,SPRY4,DUSP10,DUSP5,GADD45A,JUN,ZC3H12A,ERRFI1,XDH,DNAJC3,TNFAIP3
GO:1901700	response to oxygen-containing compound	27	1427	0.46	1.87e-05	9606.ENSP00000216037,9606.ENSP00000227752,9606.ENSP00000239223,9606.ENSP00000242480,9606.ENSP00000244869,9606.ENSP00000245919,9606.ENSP00000253063,9606.ENSP00000256458,9606.ENSP00000272233,9606.ENSP00000296026,9606.ENSP00000306512,9606.ENSP00000307305,9606.ENSP00000310170,9606.ENSP00000312988,9606.ENSP00000344741,9606.ENSP00000355866,9606.ENSP00000356438,9606.ENSP00000356954,9606.ENSP00000360266,…	XBP1,IL10RA,DUSP1,EGR2,EREG,FOSB,SESN2,IRAK2,RHOB,CXCL3,CXCL8,DDIT4,FOSL1,NFKBIB,INSIG1,DUSP10,PTGS2,CTGF,JUN,ANKRD1,ZC3H12A,ERRFI1,EDN1,VIMP,CXCL2,TNFAIP3,NR4A3
GO:0010556	regulation of macromolecule biosynthetic process	52	4143	0.28	2.07e-05	9606.ENSP00000200453,9606.ENSP00000216037,9606.ENSP00000228437,9606.ENSP00000230990,9606.ENSP00000239223,9606.ENSP00000242480,9606.ENSP00000244869,9606.ENSP00000245919,9606.ENSP00000252809,9606.ENSP00000253063,9606.ENSP00000256458,9606.ENSP00000256495,9606.ENSP00000263339,9606.ENSP00000264444,9606.ENSP00000270162,9606.ENSP00000273153,9606.ENSP00000273668,9606.ENSP00000277746,9606.ENSP00000307235,…	PPP1R15A,XBP1,PRDM4,HBEGF,DUSP1,EGR2,EREG,FOSB,GDF15,SESN2,IRAK2,BHLHE40,IL1A,MXD1,SIK1,CSRNP1,EAF2,NRBF2,EIF2AK3,FOSL1,NFKBIB,SERTAD3,OVOL1,ZBTB49,ATF3,INSIG1,MAFF,CREB5,SERTAD1,TSC22D2,SGK1,JUN,ANKRD1,TSC22D3,ZC3H12A,ZBTB43,TSPYL2,ZNF165,ERRFI1,EDN1,ZMYM5,TDG,VIMP,ZNF527,CYR61,KLF6,UBC,DDIT3,ZNF699,DNAJC3,TNFAIP3,NR4A3
GO:0007154	cell communication	60	5219	0.24	3.29e-05	9606.ENSP00000200453,9606.ENSP00000216037,9606.ENSP00000222803,9606.ENSP00000227752,9606.ENSP00000228437,9606.ENSP00000230990,9606.ENSP00000234420,9606.ENSP00000239223,9606.ENSP00000244869,9606.ENSP00000249356,9606.ENSP00000252809,9606.ENSP00000253063,9606.ENSP00000256458,9606.ENSP00000261845,9606.ENSP00000263056,9606.ENSP00000263339,9606.ENSP00000270162,9606.ENSP00000272233,9606.ENSP00000273153,…	PPP1R15A,XBP1,FKBP14,IL10RA,PRDM4,HBEGF,MSH6,DUSP1,EREG,DNAJB9,GDF15,SESN2,IRAK2,MAPK6,MAP3K8,IL1A,SIK1,RHOB,CSRNP1,PLK2,DUSP6,CXCL3,CXCL8,EIF2AK3,DDIT4,FOSL1,NFKBIB,TNFRSF12A,YOD1,ATF3,PEAR1,INSIG1,RASSF1,EPHA2,PTGS2,RGS16,SGK1,CTGF,MCL1,DUSP5,GADD45A,JUN,ZC3H12A,TSPYL2,RND3,EDN1,HRH1,VIMP,CYR61,ESRP1,HERPUD1,TIPARP,AMOTL2,CXCL2,UBC,DDIT3,DNAJC3,TNFAIP3,NR4A3,MAP3K14
GO:0010557	positive regulation of macromolecule biosynthetic process	30	1758	0.41	3.29e-05	9606.ENSP00000200453,9606.ENSP00000216037,9606.ENSP00000228437,9606.ENSP00000242480,9606.ENSP00000244869,9606.ENSP00000245919,9606.ENSP00000253063,9606.ENSP00000263339,9606.ENSP00000273153,9606.ENSP00000273668,9606.ENSP00000307235,9606.ENSP00000310170,9606.ENSP00000312988,9606.ENSP00000325414,9606.ENSP00000338807,9606.ENSP00000344352,9606.ENSP00000344741,9606.ENSP00000345393,9606.ENSP00000350359,…	PPP1R15A,XBP1,PRDM4,EGR2,EREG,FOSB,SESN2,IL1A,CSRNP1,EAF2,EIF2AK3,FOSL1,NFKBIB,SERTAD3,ZBTB49,ATF3,INSIG1,MAFF,CREB5,SERTAD1,JUN,ANKRD1,ZC3H12A,EDN1,CYR61,KLF6,UBC,DDIT3,DNAJC3,NR4A3
GO:0023052	signaling	59	5108	0.24	3.7e-05	9606.ENSP00000200453,9606.ENSP00000216037,9606.ENSP00000222803,9606.ENSP00000227752,9606.ENSP00000228437,9606.ENSP00000230990,9606.ENSP00000234420,9606.ENSP00000239223,9606.ENSP00000244869,9606.ENSP00000249356,9606.ENSP00000252809,9606.ENSP00000253063,9606.ENSP00000256458,9606.ENSP00000261845,9606.ENSP00000263056,9606.ENSP00000263339,9606.ENSP00000270162,9606.ENSP00000272233,9606.ENSP00000273153,…	PPP1R15A,XBP1,FKBP14,IL10RA,PRDM4,HBEGF,MSH6,DUSP1,EREG,DNAJB9,GDF15,SESN2,IRAK2,MAPK6,MAP3K8,IL1A,SIK1,RHOB,CSRNP1,PLK2,DUSP6,CXCL3,CXCL8,EIF2AK3,DDIT4,NFKBIB,TNFRSF12A,YOD1,ATF3,PEAR1,INSIG1,RASSF1,EPHA2,PTGS2,RGS16,SGK1,CTGF,MCL1,DUSP5,GADD45A,JUN,ZC3H12A,TSPYL2,RND3,EDN1,HRH1,VIMP,CYR61,ESRP1,HERPUD1,TIPARP,AMOTL2,CXCL2,UBC,DDIT3,DNAJC3,TNFAIP3,NR4A3,MAP3K14
GO:1902533	positive regulation of intracellular signal transduction	21	959	0.52	4.16e-05	9606.ENSP00000216037,9606.ENSP00000230990,9606.ENSP00000244869,9606.ENSP00000252809,9606.ENSP00000256458,9606.ENSP00000263056,9606.ENSP00000264711,9606.ENSP00000279488,9606.ENSP00000321026,9606.ENSP00000356954,9606.ENSP00000358022,9606.ENSP00000358596,9606.ENSP00000360025,9606.ENSP00000360266,9606.ENSP00000360762,9606.ENSP00000362179,9606.ENSP00000368683,9606.ENSP00000368727,9606.ENSP00000441543,…	XBP1,HBEGF,EREG,GDF15,IRAK2,MAP3K8,DNAJC27,DUSP6,LURAP1L,CTGF,MCL1,DUSP5,GADD45A,JUN,ANKRD1,ZC3H12A,EDN1,XDH,UBC,DDIT3,MAP3K14
GO:0043409	negative regulation of MAPK cascade	9	158	0.94	4.19e-05	9606.ENSP00000216037,9606.ENSP00000239223,9606.ENSP00000240100,9606.ENSP00000279488,9606.ENSP00000344352,9606.ENSP00000344967,9606.ENSP00000355866,9606.ENSP00000358596,9606.ENSP00000366702	XBP1,DUSP1,DUSP4,DUSP6,ATF3,SPRY4,DUSP10,DUSP5,ERRFI1
GO:0044238	primary metabolic process	85	8808	0.17	4.19e-05	9606.ENSP00000075120,9606.ENSP00000200453,9606.ENSP00000216037,9606.ENSP00000222803,9606.ENSP00000228437,9606.ENSP00000230990,9606.ENSP00000234420,9606.ENSP00000239223,9606.ENSP00000240100,9606.ENSP00000242480,9606.ENSP00000244869,9606.ENSP00000245919,9606.ENSP00000249356,9606.ENSP00000253063,9606.ENSP00000256458,9606.ENSP00000256495,9606.ENSP00000261845,9606.ENSP00000263056,9606.ENSP00000264444,…	SLC2A3,PPP1R15A,XBP1,FKBP14,PRDM4,HBEGF,MSH6,DUSP1,DUSP4,EGR2,EREG,FOSB,DNAJB9,SESN2,IRAK2,BHLHE40,MAPK6,MAP3K8,MXD1,SIK1,CSRNP1,EAF2,PLK2,NRBF2,ZC3H12C,DUSP6,EIF2AK3,FOSL1,FUT1,NFKBIB,SERTAD3,YOD1,RAB12,OVOL1,ZBTB49,ATF3,INSIG1,MAFF,CREB5,SERTAD1,EPHA2,DUSP10,PTGS2,SGK1,UAP1,CTGF,DUSP5,PTBP2,GADD45A,JUN,LONRF3,YRDC,SLC25A25,ZC3H12A,ZBTB43,TSPYL2,ZNF165,GPCPD1,EDN1,XDH,PIGA,ZMYM5,TDG,VCPKMT,PDP1,…
GO:0000188	inactivation of MAPK activity	5	26	1.46	4.34e-05	9606.ENSP00000239223,9606.ENSP00000240100,9606.ENSP00000279488,9606.ENSP00000355866,9606.ENSP00000358596	DUSP1,DUSP4,DUSP6,DUSP10,DUSP5
GO:0040012	regulation of locomotion	20	881	0.54	4.34e-05	9606.ENSP00000216037,9606.ENSP00000230990,9606.ENSP00000244869,9606.ENSP00000263339,9606.ENSP00000265138,9606.ENSP00000272233,9606.ENSP00000274289,9606.ENSP00000296026,9606.ENSP00000306512,9606.ENSP00000351209,9606.ENSP00000355866,9606.ENSP00000356438,9606.ENSP00000356832,9606.ENSP00000360266,9606.ENSP00000360672,9606.ENSP00000362179,9606.ENSP00000368683,9606.ENSP00000398736,9606.ENSP00000427279,…	XBP1,HBEGF,EREG,IL1A,ARRDC3,RHOB,PLK2,CXCL3,CXCL8,EPHA2,DUSP10,PTGS2,SGK1,JUN,PARD6B,ZC3H12A,EDN1,CYR61,CXCL2,NR4A3
GO:0048661	positive regulation of smooth muscle cell proliferation	7	80	1.12	4.34e-05	9606.ENSP00000216037,9606.ENSP00000230990,9606.ENSP00000244869,9606.ENSP00000356438,9606.ENSP00000360266,9606.ENSP00000368683,9606.ENSP00000482027	XBP1,HBEGF,EREG,PTGS2,JUN,EDN1,NR4A3
GO:0051252	regulation of RNA metabolic process	49	3890	0.28	4.42e-05	9606.ENSP00000216037,9606.ENSP00000228437,9606.ENSP00000242480,9606.ENSP00000244869,9606.ENSP00000245919,9606.ENSP00000252809,9606.ENSP00000253063,9606.ENSP00000256458,9606.ENSP00000256495,9606.ENSP00000263339,9606.ENSP00000264444,9606.ENSP00000270162,9606.ENSP00000273153,9606.ENSP00000273668,9606.ENSP00000277746,9606.ENSP00000307235,9606.ENSP00000310170,9606.ENSP00000312988,9606.ENSP00000325414,…	XBP1,PRDM4,EGR2,EREG,FOSB,GDF15,SESN2,IRAK2,BHLHE40,IL1A,MXD1,SIK1,CSRNP1,EAF2,NRBF2,EIF2AK3,FOSL1,NFKBIB,SERTAD3,OVOL1,ZBTB49,ATF3,INSIG1,MAFF,CREB5,SERTAD1,TSC22D2,SGK1,PTBP2,JUN,ANKRD1,TSC22D3,ZC3H12A,ZBTB43,TSPYL2,ZNF165,EDN1,ZMYM5,TDG,ZNF527,CYR61,ESRP1,KLF6,USP36,UBC,DDIT3,ZNF699,TNFAIP3,NR4A3
GO:0071704	organic substance metabolic process	87	9135	0.16	4.42e-05	9606.ENSP00000075120,9606.ENSP00000200453,9606.ENSP00000216037,9606.ENSP00000222803,9606.ENSP00000228437,9606.ENSP00000230990,9606.ENSP00000234420,9606.ENSP00000239223,9606.ENSP00000240100,9606.ENSP00000242480,9606.ENSP00000244869,9606.ENSP00000245919,9606.ENSP00000249356,9606.ENSP00000253063,9606.ENSP00000256458,9606.ENSP00000256495,9606.ENSP00000261845,9606.ENSP00000263056,9606.ENSP00000263960,…	SLC2A3,PPP1R15A,XBP1,FKBP14,PRDM4,HBEGF,MSH6,DUSP1,DUSP4,EGR2,EREG,FOSB,DNAJB9,SESN2,IRAK2,BHLHE40,MAPK6,MAP3K8,COQ10B,MXD1,SIK1,CSRNP1,EAF2,PLK2,NRBF2,ZC3H12C,DUSP6,CXCL8,EIF2AK3,FOSL1,FUT1,NFKBIB,SERTAD3,YOD1,RAB12,OVOL1,ZBTB49,ATF3,INSIG1,MAFF,CREB5,SERTAD1,EPHA2,DUSP10,PTGS2,SGK1,UAP1,CTGF,DUSP5,PTBP2,GADD45A,JUN,LONRF3,YRDC,SLC25A25,ZC3H12A,ZBTB43,TSPYL2,ZNF165,GPCPD1,EDN1,XDH,PIGA,ZMYM5,TDG…
GO:0072359	circulatory system development	19	807	0.55	4.64e-05	9606.ENSP00000216037,9606.ENSP00000244869,9606.ENSP00000270162,9606.ENSP00000272233,9606.ENSP00000306512,9606.ENSP00000307235,9606.ENSP00000310170,9606.ENSP00000326737,9606.ENSP00000351209,9606.ENSP00000356438,9606.ENSP00000356954,9606.ENSP00000360266,9606.ENSP00000360762,9606.ENSP00000362179,9606.ENSP00000366702,9606.ENSP00000368683,9606.ENSP00000398736,9606.ENSP00000420612,9606.ENSP00000448665	XBP1,EREG,SIK1,RHOB,CXCL8,EIF2AK3,FOSL1,TNFRSF12A,EPHA2,PTGS2,CTGF,JUN,ANKRD1,ZC3H12A,ERRFI1,EDN1,CYR61,TIPARP,DDIT3
GO:2000145	regulation of cell motility	19	807	0.55	4.64e-05	9606.ENSP00000216037,9606.ENSP00000230990,9606.ENSP00000244869,9606.ENSP00000263339,9606.ENSP00000272233,9606.ENSP00000274289,9606.ENSP00000296026,9606.ENSP00000306512,9606.ENSP00000351209,9606.ENSP00000355866,9606.ENSP00000356438,9606.ENSP00000356832,9606.ENSP00000360266,9606.ENSP00000360672,9606.ENSP00000362179,9606.ENSP00000368683,9606.ENSP00000398736,9606.ENSP00000427279,9606.ENSP00000482027	XBP1,HBEGF,EREG,IL1A,RHOB,PLK2,CXCL3,CXCL8,EPHA2,DUSP10,PTGS2,SGK1,JUN,PARD6B,ZC3H12A,EDN1,CYR61,CXCL2,NR4A3
GO:0031401	positive regulation of protein modification process	23	1149	0.48	5.09e-05	9606.ENSP00000200453,9606.ENSP00000216037,9606.ENSP00000230990,9606.ENSP00000244869,9606.ENSP00000252809,9606.ENSP00000256458,9606.ENSP00000263056,9606.ENSP00000264711,9606.ENSP00000265138,9606.ENSP00000279488,9606.ENSP00000349547,9606.ENSP00000356438,9606.ENSP00000356954,9606.ENSP00000358596,9606.ENSP00000360025,9606.ENSP00000360266,9606.ENSP00000362179,9606.ENSP00000368683,9606.ENSP00000368727,…	PPP1R15A,XBP1,HBEGF,EREG,GDF15,IRAK2,MAP3K8,DNAJC27,ARRDC3,DUSP6,RASSF1,PTGS2,CTGF,DUSP5,GADD45A,JUN,ZC3H12A,EDN1,XDH,CYR61,DCUN1D2,UBC,MAP3K14
GO:0010468	regulation of gene expression	54	4533	0.26	5.17e-05	9606.ENSP00000200453,9606.ENSP00000216037,9606.ENSP00000228437,9606.ENSP00000242480,9606.ENSP00000244869,9606.ENSP00000245919,9606.ENSP00000252809,9606.ENSP00000253063,9606.ENSP00000256458,9606.ENSP00000256495,9606.ENSP00000261845,9606.ENSP00000263339,9606.ENSP00000264444,9606.ENSP00000270162,9606.ENSP00000273153,9606.ENSP00000273668,9606.ENSP00000277746,9606.ENSP00000307235,9606.ENSP00000310170,…	PPP1R15A,XBP1,PRDM4,EGR2,EREG,FOSB,GDF15,SESN2,IRAK2,BHLHE40,MAPK6,IL1A,MXD1,SIK1,CSRNP1,EAF2,NRBF2,EIF2AK3,FOSL1,SERTAD3,OVOL1,ZBTB49,ATF3,INSIG1,MAFF,CREB5,SERTAD1,TSC22D2,SGK1,CTGF,PTBP2,JUN,ANKRD1,TSC22D3,ZC3H12A,ZBTB43,TSPYL2,ZNF165,EDN1,XDH,ZMYM5,TDG,ZNF527,CYR61,ESRP1,KLF6,TIPARP,USP36,UBC,DDIT3,ZNF699,DNAJC3,TNFAIP3,NR4A3
GO:1903508	positive regulation of nucleic acid-templated transcription	27	1520	0.43	5.33e-05	9606.ENSP00000216037,9606.ENSP00000228437,9606.ENSP00000242480,9606.ENSP00000245919,9606.ENSP00000253063,9606.ENSP00000263339,9606.ENSP00000273153,9606.ENSP00000273668,9606.ENSP00000307235,9606.ENSP00000310170,9606.ENSP00000312988,9606.ENSP00000325414,9606.ENSP00000338807,9606.ENSP00000344352,9606.ENSP00000344741,9606.ENSP00000345393,9606.ENSP00000350359,9606.ENSP00000350633,9606.ENSP00000360266,…	XBP1,PRDM4,EGR2,FOSB,SESN2,IL1A,CSRNP1,EAF2,EIF2AK3,FOSL1,NFKBIB,SERTAD3,ZBTB49,ATF3,INSIG1,MAFF,CREB5,SERTAD1,JUN,ANKRD1,ZC3H12A,EDN1,CYR61,KLF6,UBC,DDIT3,NR4A3
GO:2000112	regulation of cellular macromolecule biosynthetic process	50	4050	0.27	5.53e-05	9606.ENSP00000200453,9606.ENSP00000216037,9606.ENSP00000228437,9606.ENSP00000230990,9606.ENSP00000239223,9606.ENSP00000242480,9606.ENSP00000244869,9606.ENSP00000245919,9606.ENSP00000252809,9606.ENSP00000253063,9606.ENSP00000256458,9606.ENSP00000256495,9606.ENSP00000263339,9606.ENSP00000264444,9606.ENSP00000270162,9606.ENSP00000273153,9606.ENSP00000273668,9606.ENSP00000277746,9606.ENSP00000307235,…	PPP1R15A,XBP1,PRDM4,HBEGF,DUSP1,EGR2,EREG,FOSB,GDF15,SESN2,IRAK2,BHLHE40,IL1A,MXD1,SIK1,CSRNP1,EAF2,NRBF2,EIF2AK3,FOSL1,SERTAD3,OVOL1,ZBTB49,ATF3,INSIG1,MAFF,CREB5,SERTAD1,TSC22D2,SGK1,JUN,ANKRD1,TSC22D3,ZC3H12A,ZBTB43,TSPYL2,ZNF165,EDN1,ZMYM5,TDG,VIMP,ZNF527,CYR61,KLF6,UBC,DDIT3,ZNF699,DNAJC3,TNFAIP3,NR4A3
GO:0030335	positive regulation of cell migration	14	452	0.67	5.54e-05	9606.ENSP00000216037,9606.ENSP00000230990,9606.ENSP00000263339,9606.ENSP00000272233,9606.ENSP00000274289,9606.ENSP00000296026,9606.ENSP00000306512,9606.ENSP00000356438,9606.ENSP00000360266,9606.ENSP00000362179,9606.ENSP00000368683,9606.ENSP00000398736,9606.ENSP00000427279,9606.ENSP00000482027	XBP1,HBEGF,IL1A,RHOB,PLK2,CXCL3,CXCL8,PTGS2,JUN,ZC3H12A,EDN1,CYR61,CXCL2,NR4A3
GO:0071347	cellular response to interleukin-1	8	124	0.99	6.03e-05	9606.ENSP00000256458,9606.ENSP00000263056,9606.ENSP00000263339,9606.ENSP00000306512,9606.ENSP00000360762,9606.ENSP00000362179,9606.ENSP00000368683,9606.ENSP00000441543	IRAK2,MAP3K8,IL1A,CXCL8,ANKRD1,ZC3H12A,EDN1,UBC
GO:0048646	anatomical structure formation involved in morphogenesis	19	831	0.54	6.52e-05	9606.ENSP00000216037,9606.ENSP00000239223,9606.ENSP00000240100,9606.ENSP00000242480,9606.ENSP00000244869,9606.ENSP00000272233,9606.ENSP00000306512,9606.ENSP00000307235,9606.ENSP00000326737,9606.ENSP00000351209,9606.ENSP00000356438,9606.ENSP00000356954,9606.ENSP00000358596,9606.ENSP00000360266,9606.ENSP00000360762,9606.ENSP00000362179,9606.ENSP00000368683,9606.ENSP00000398736,9606.ENSP00000482027	XBP1,DUSP1,DUSP4,EGR2,EREG,RHOB,CXCL8,EIF2AK3,TNFRSF12A,EPHA2,PTGS2,CTGF,DUSP5,JUN,ANKRD1,ZC3H12A,EDN1,CYR61,NR4A3
GO:0048856	anatomical structure development	58	5085	0.24	6.52e-05	9606.ENSP00000216037,9606.ENSP00000230990,9606.ENSP00000234420,9606.ENSP00000239223,9606.ENSP00000240100,9606.ENSP00000242480,9606.ENSP00000244869,9606.ENSP00000249356,9606.ENSP00000252809,9606.ENSP00000259874,9606.ENSP00000261845,9606.ENSP00000263339,9606.ENSP00000264444,9606.ENSP00000265138,9606.ENSP00000270162,9606.ENSP00000272233,9606.ENSP00000273153,9606.ENSP00000274289,9606.ENSP00000279488,…	XBP1,HBEGF,MSH6,DUSP1,DUSP4,EGR2,EREG,DNAJB9,GDF15,IER3,MAPK6,IL1A,MXD1,ARRDC3,SIK1,RHOB,CSRNP1,PLK2,DUSP6,SEC24D,CXCL8,EIF2AK3,DDIT4,FOSL1,TNFRSF12A,OVOL1,ATF3,INSIG1,SPRY4,MAFF,EPHA2,OSGIN1,DUSP10,PTGS2,SGK1,CTGF,TUFT1,MCL1,DUSP5,PTBP2,JUN,PARD6B,ANKRD1,SLC25A25,ZC3H12A,ERRFI1,GPCPD1,EDN1,XDH,ZMYM5,CYR61,KLF6,TIPARP,PGM3,MANF,DDIT3,TNFAIP3,NR4A3
GO:0030334	regulation of cell migration	18	753	0.56	6.6e-05	9606.ENSP00000216037,9606.ENSP00000230990,9606.ENSP00000263339,9606.ENSP00000272233,9606.ENSP00000274289,9606.ENSP00000296026,9606.ENSP00000306512,9606.ENSP00000351209,9606.ENSP00000355866,9606.ENSP00000356438,9606.ENSP00000356832,9606.ENSP00000360266,9606.ENSP00000360672,9606.ENSP00000362179,9606.ENSP00000368683,9606.ENSP00000398736,9606.ENSP00000427279,9606.ENSP00000482027	XBP1,HBEGF,IL1A,RHOB,PLK2,CXCL3,CXCL8,EPHA2,DUSP10,PTGS2,SGK1,JUN,PARD6B,ZC3H12A,EDN1,CYR61,CXCL2,NR4A3
GO:0048660	regulation of smooth muscle cell proliferation	8	126	0.98	6.6e-05	9606.ENSP00000216037,9606.ENSP00000230990,9606.ENSP00000244869,9606.ENSP00000356438,9606.ENSP00000360266,9606.ENSP00000368683,9606.ENSP00000481570,9606.ENSP00000482027	XBP1,HBEGF,EREG,PTGS2,JUN,EDN1,TNFAIP3,NR4A3
GO:0043405	regulation of MAP kinase activity	12	337	0.73	7.41e-05	9606.ENSP00000239223,9606.ENSP00000240100,9606.ENSP00000252809,9606.ENSP00000256458,9606.ENSP00000263056,9606.ENSP00000279488,9606.ENSP00000355866,9606.ENSP00000358596,9606.ENSP00000360025,9606.ENSP00000368683,9606.ENSP00000441543,9606.ENSP00000482657	DUSP1,DUSP4,GDF15,IRAK2,MAP3K8,DUSP6,DUSP10,DUSP5,GADD45A,EDN1,UBC,MAP3K14
GO:0007275	multicellular organism development	55	4726	0.25	7.51e-05	9606.ENSP00000216037,9606.ENSP00000230990,9606.ENSP00000234420,9606.ENSP00000239223,9606.ENSP00000240100,9606.ENSP00000242480,9606.ENSP00000244869,9606.ENSP00000249356,9606.ENSP00000261845,9606.ENSP00000264444,9606.ENSP00000265138,9606.ENSP00000270162,9606.ENSP00000272233,9606.ENSP00000273153,9606.ENSP00000274289,9606.ENSP00000279488,9606.ENSP00000280551,9606.ENSP00000306512,9606.ENSP00000307235,…	XBP1,HBEGF,MSH6,DUSP1,DUSP4,EGR2,EREG,DNAJB9,MAPK6,MXD1,ARRDC3,SIK1,RHOB,CSRNP1,PLK2,DUSP6,SEC24D,CXCL8,EIF2AK3,DDIT4,FOSL1,TNFRSF12A,OVOL1,ATF3,INSIG1,SPRY4,MAFF,EPHA2,OSGIN1,DUSP10,PTGS2,SGK1,CTGF,TUFT1,MCL1,DUSP5,PTBP2,JUN,PARD6B,ANKRD1,SLC25A25,ZC3H12A,ERRFI1,GPCPD1,EDN1,XDH,ZMYM5,CYR61,KLF6,TIPARP,PGM3,MANF,DDIT3,TNFAIP3,NR4A3
GO:0001558	regulation of cell growth	13	402	0.69	7.76e-05	9606.ENSP00000216037,9606.ENSP00000230990,9606.ENSP00000253063,9606.ENSP00000273668,9606.ENSP00000325414,9606.ENSP00000326737,9606.ENSP00000355374,9606.ENSP00000356832,9606.ENSP00000356954,9606.ENSP00000364591,9606.ENSP00000368683,9606.ENSP00000398736,9606.ENSP00000427108	XBP1,HBEGF,SESN2,EAF2,SERTAD3,TNFRSF12A,OSGIN1,SGK1,CTGF,TSPYL2,EDN1,CYR61,CDKN2AIP
GO:0006807	nitrogen compound metabolic process	81	8349	0.17	7.96e-05	9606.ENSP00000200453,9606.ENSP00000216037,9606.ENSP00000222803,9606.ENSP00000228437,9606.ENSP00000230990,9606.ENSP00000234420,9606.ENSP00000239223,9606.ENSP00000240100,9606.ENSP00000242480,9606.ENSP00000244869,9606.ENSP00000245919,9606.ENSP00000249356,9606.ENSP00000253063,9606.ENSP00000256458,9606.ENSP00000256495,9606.ENSP00000261845,9606.ENSP00000263056,9606.ENSP00000264444,9606.ENSP00000270162,…	PPP1R15A,XBP1,FKBP14,PRDM4,HBEGF,MSH6,DUSP1,DUSP4,EGR2,EREG,FOSB,DNAJB9,SESN2,IRAK2,BHLHE40,MAPK6,MAP3K8,MXD1,SIK1,CSRNP1,EAF2,PLK2,NRBF2,ZC3H12C,DUSP6,EIF2AK3,FOSL1,FUT1,NFKBIB,SERTAD3,YOD1,RAB12,OVOL1,ZBTB49,ATF3,MAFF,CREB5,SERTAD1,EPHA2,DUSP10,PTGS2,SGK1,UAP1,CTGF,DUSP5,PTBP2,GADD45A,JUN,LONRF3,YRDC,SLC25A25,ZC3H12A,ZBTB43,TSPYL2,ZNF165,XDH,PIGA,ZMYM5,TDG,VCPKMT,PDP1,VIMP,ZNF527,CYR61,NABP1,ES…
GO:0045944	positive regulation of transcription by RNA polymerase II	22	1104	0.48	8.33e-05	9606.ENSP00000216037,9606.ENSP00000228437,9606.ENSP00000242480,9606.ENSP00000245919,9606.ENSP00000253063,9606.ENSP00000263339,9606.ENSP00000273153,9606.ENSP00000273668,9606.ENSP00000310170,9606.ENSP00000338807,9606.ENSP00000344352,9606.ENSP00000344741,9606.ENSP00000345393,9606.ENSP00000350633,9606.ENSP00000360266,9606.ENSP00000362179,9606.ENSP00000368683,9606.ENSP00000398736,9606.ENSP00000419923,…	XBP1,PRDM4,EGR2,FOSB,SESN2,IL1A,CSRNP1,EAF2,FOSL1,ZBTB49,ATF3,INSIG1,MAFF,SERTAD1,JUN,ZC3H12A,EDN1,CYR61,KLF6,UBC,DDIT3,NR4A3
GO:0045935	positive regulation of nucleobase-containing compound metabolic process	29	1770	0.4	8.98e-05	9606.ENSP00000216037,9606.ENSP00000228437,9606.ENSP00000234420,9606.ENSP00000242480,9606.ENSP00000244869,9606.ENSP00000245919,9606.ENSP00000253063,9606.ENSP00000263339,9606.ENSP00000273153,9606.ENSP00000273668,9606.ENSP00000307235,9606.ENSP00000310170,9606.ENSP00000312988,9606.ENSP00000325414,9606.ENSP00000338807,9606.ENSP00000344352,9606.ENSP00000344741,9606.ENSP00000345393,9606.ENSP00000350359,…	XBP1,PRDM4,MSH6,EGR2,EREG,FOSB,SESN2,IL1A,CSRNP1,EAF2,EIF2AK3,FOSL1,NFKBIB,SERTAD3,ZBTB49,ATF3,INSIG1,MAFF,CREB5,SERTAD1,JUN,ANKRD1,ZC3H12A,EDN1,CYR61,KLF6,UBC,DDIT3,NR4A3
GO:1902235	regulation of endoplasmic reticulum stress-induced intrinsic apoptotic signaling pathway	5	32	1.37	8.98e-05	9606.ENSP00000216037,9606.ENSP00000307235,9606.ENSP00000381282,9606.ENSP00000409555,9606.ENSP00000448665	XBP1,EIF2AK3,VIMP,HERPUD1,DDIT3
GO:0031327	negative regulation of cellular biosynthetic process	26	1479	0.43	9.05e-05	9606.ENSP00000216037,9606.ENSP00000230990,9606.ENSP00000239223,9606.ENSP00000244869,9606.ENSP00000245919,9606.ENSP00000253063,9606.ENSP00000256495,9606.ENSP00000264444,9606.ENSP00000270162,9606.ENSP00000307235,9606.ENSP00000307305,9606.ENSP00000337862,9606.ENSP00000344352,9606.ENSP00000344741,9606.ENSP00000360266,9606.ENSP00000360762,9606.ENSP00000361458,9606.ENSP00000362179,9606.ENSP00000364591,…	XBP1,HBEGF,DUSP1,EREG,FOSB,SESN2,BHLHE40,MXD1,SIK1,EIF2AK3,DDIT4,OVOL1,ATF3,INSIG1,JUN,ANKRD1,TSC22D3,ZC3H12A,TSPYL2,ERRFI1,EDN1,TDG,VIMP,UBC,DDIT3,NR4A3
GO:0034097	response to cytokine	21	1035	0.49	0.0001	9606.ENSP00000216037,9606.ENSP00000227752,9606.ENSP00000244869,9606.ENSP00000256458,9606.ENSP00000263056,9606.ENSP00000263339,9606.ENSP00000296026,9606.ENSP00000306512,9606.ENSP00000310170,9606.ENSP00000326737,9606.ENSP00000331748,9606.ENSP00000356438,9606.ENSP00000358022,9606.ENSP00000360266,9606.ENSP00000360762,9606.ENSP00000362179,9606.ENSP00000368683,9606.ENSP00000369820,9606.ENSP00000427279,…	XBP1,IL10RA,EREG,IRAK2,MAP3K8,IL1A,CXCL3,CXCL8,FOSL1,TNFRSF12A,RAB12,PTGS2,MCL1,JUN,ANKRD1,ZC3H12A,EDN1,PIGA,CXCL2,UBC,MAP3K14
GO:1902624	positive regulation of neutrophil migration	5	34	1.35	0.00011	9606.ENSP00000263339,9606.ENSP00000296026,9606.ENSP00000306512,9606.ENSP00000368683,9606.ENSP00000427279	IL1A,CXCL3,CXCL8,EDN1,CXCL2
GO:1903506	regulation of nucleic acid-templated transcription	46	3683	0.28	0.00011	9606.ENSP00000216037,9606.ENSP00000228437,9606.ENSP00000242480,9606.ENSP00000244869,9606.ENSP00000245919,9606.ENSP00000252809,9606.ENSP00000253063,9606.ENSP00000256458,9606.ENSP00000256495,9606.ENSP00000263339,9606.ENSP00000264444,9606.ENSP00000270162,9606.ENSP00000273153,9606.ENSP00000273668,9606.ENSP00000277746,9606.ENSP00000307235,9606.ENSP00000310170,9606.ENSP00000312988,9606.ENSP00000325414,…	XBP1,PRDM4,EGR2,EREG,FOSB,GDF15,SESN2,IRAK2,BHLHE40,IL1A,MXD1,SIK1,CSRNP1,EAF2,NRBF2,EIF2AK3,FOSL1,NFKBIB,SERTAD3,OVOL1,ZBTB49,ATF3,INSIG1,MAFF,CREB5,SERTAD1,TSC22D2,SGK1,JUN,ANKRD1,TSC22D3,ZC3H12A,ZBTB43,TSPYL2,ZNF165,EDN1,ZMYM5,TDG,ZNF527,CYR61,KLF6,UBC,DDIT3,ZNF699,TNFAIP3,NR4A3
GO:0010243	response to organonitrogen compound	19	876	0.52	0.00012	9606.ENSP00000216037,9606.ENSP00000239223,9606.ENSP00000242480,9606.ENSP00000244869,9606.ENSP00000245919,9606.ENSP00000249356,9606.ENSP00000253063,9606.ENSP00000310170,9606.ENSP00000326813,9606.ENSP00000356438,9606.ENSP00000356954,9606.ENSP00000360266,9606.ENSP00000366702,9606.ENSP00000368683,9606.ENSP00000380247,9606.ENSP00000381282,9606.ENSP00000409555,9606.ENSP00000481570,9606.ENSP00000482027	XBP1,DUSP1,EGR2,EREG,FOSB,DNAJB9,SESN2,FOSL1,YOD1,PTGS2,CTGF,JUN,ERRFI1,EDN1,HRH1,VIMP,HERPUD1,TNFAIP3,NR4A3
GO:0045937	positive regulation of phosphate metabolic process	21	1052	0.48	0.00013	9606.ENSP00000200453,9606.ENSP00000216037,9606.ENSP00000230990,9606.ENSP00000244869,9606.ENSP00000252809,9606.ENSP00000256458,9606.ENSP00000263056,9606.ENSP00000264711,9606.ENSP00000279488,9606.ENSP00000356438,9606.ENSP00000356954,9606.ENSP00000358596,9606.ENSP00000360025,9606.ENSP00000360266,9606.ENSP00000362179,9606.ENSP00000368683,9606.ENSP00000368727,9606.ENSP00000380247,9606.ENSP00000398736,…	PPP1R15A,XBP1,HBEGF,EREG,GDF15,IRAK2,MAP3K8,DNAJC27,DUSP6,PTGS2,CTGF,DUSP5,GADD45A,JUN,ZC3H12A,EDN1,XDH,HRH1,CYR61,UBC,MAP3K14
GO:0009888	tissue development	27	1626	0.4	0.00015	9606.ENSP00000216037,9606.ENSP00000230990,9606.ENSP00000239223,9606.ENSP00000240100,9606.ENSP00000242480,9606.ENSP00000244869,9606.ENSP00000265138,9606.ENSP00000270162,9606.ENSP00000272233,9606.ENSP00000307235,9606.ENSP00000337862,9606.ENSP00000344352,9606.ENSP00000345393,9606.ENSP00000351209,9606.ENSP00000356438,9606.ENSP00000356954,9606.ENSP00000357842,9606.ENSP00000358596,9606.ENSP00000360266,…	XBP1,HBEGF,DUSP1,DUSP4,EGR2,EREG,ARRDC3,SIK1,RHOB,EIF2AK3,OVOL1,ATF3,MAFF,EPHA2,PTGS2,CTGF,TUFT1,DUSP5,JUN,ANKRD1,SLC25A25,ERRFI1,GPCPD1,EDN1,CYR61,TIPARP,NR4A3
GO:0010647	positive regulation of cell communication	27	1631	0.4	0.00015	9606.ENSP00000216037,9606.ENSP00000230990,9606.ENSP00000244869,9606.ENSP00000252809,9606.ENSP00000256458,9606.ENSP00000263056,9606.ENSP00000264711,9606.ENSP00000274289,9606.ENSP00000279488,9606.ENSP00000321026,9606.ENSP00000326737,9606.ENSP00000344352,9606.ENSP00000356438,9606.ENSP00000356954,9606.ENSP00000358022,9606.ENSP00000358596,9606.ENSP00000360025,9606.ENSP00000360266,9606.ENSP00000360762,…	XBP1,HBEGF,EREG,GDF15,IRAK2,MAP3K8,DNAJC27,PLK2,DUSP6,LURAP1L,TNFRSF12A,ATF3,PTGS2,CTGF,MCL1,DUSP5,GADD45A,JUN,ANKRD1,ZC3H12A,EDN1,XDH,CYR61,CDKN2AIP,UBC,DDIT3,MAP3K14
GO:0045893	positive regulation of transcription, DNA-templated	25	1435	0.42	0.00015	9606.ENSP00000216037,9606.ENSP00000228437,9606.ENSP00000242480,9606.ENSP00000245919,9606.ENSP00000253063,9606.ENSP00000263339,9606.ENSP00000273153,9606.ENSP00000273668,9606.ENSP00000307235,9606.ENSP00000310170,9606.ENSP00000325414,9606.ENSP00000338807,9606.ENSP00000344352,9606.ENSP00000344741,9606.ENSP00000345393,9606.ENSP00000350359,9606.ENSP00000350633,9606.ENSP00000360266,9606.ENSP00000362179,…	XBP1,PRDM4,EGR2,FOSB,SESN2,IL1A,CSRNP1,EAF2,EIF2AK3,FOSL1,SERTAD3,ZBTB49,ATF3,INSIG1,MAFF,CREB5,SERTAD1,JUN,ZC3H12A,EDN1,CYR61,KLF6,UBC,DDIT3,NR4A3
GO:0071222	cellular response to lipopolysaccharide	8	146	0.92	0.00015	9606.ENSP00000216037,9606.ENSP00000256458,9606.ENSP00000306512,9606.ENSP00000312988,9606.ENSP00000360762,9606.ENSP00000362179,9606.ENSP00000381282,9606.ENSP00000481570	XBP1,IRAK2,CXCL8,NFKBIB,ANKRD1,ZC3H12A,VIMP,TNFAIP3
GO:0071496	cellular response to external stimulus	11	305	0.74	0.00015	9606.ENSP00000216037,9606.ENSP00000253063,9606.ENSP00000307235,9606.ENSP00000310170,9606.ENSP00000344352,9606.ENSP00000356438,9606.ENSP00000360025,9606.ENSP00000360266,9606.ENSP00000360762,9606.ENSP00000362179,9606.ENSP00000482657	XBP1,SESN2,EIF2AK3,FOSL1,ATF3,PTGS2,GADD45A,JUN,ANKRD1,ZC3H12A,MAP3K14
GO:1901342	regulation of vasculature development	11	305	0.74	0.00015	9606.ENSP00000216037,9606.ENSP00000263339,9606.ENSP00000272233,9606.ENSP00000274289,9606.ENSP00000306512,9606.ENSP00000326737,9606.ENSP00000351209,9606.ENSP00000356438,9606.ENSP00000362179,9606.ENSP00000368727,9606.ENSP00000481570	XBP1,IL1A,RHOB,PLK2,CXCL8,TNFRSF12A,EPHA2,PTGS2,ZC3H12A,XDH,TNFAIP3
GO:0006979	response to oxidative stress	12	373	0.69	0.00016	9606.ENSP00000216037,9606.ENSP00000239223,9606.ENSP00000253063,9606.ENSP00000272233,9606.ENSP00000310170,9606.ENSP00000356438,9606.ENSP00000360266,9606.ENSP00000362179,9606.ENSP00000368683,9606.ENSP00000381282,9606.ENSP00000481570,9606.ENSP00000482027	XBP1,DUSP1,SESN2,RHOB,FOSL1,PTGS2,JUN,ZC3H12A,EDN1,VIMP,TNFAIP3,NR4A3
GO:0023056	positive regulation of signaling	27	1638	0.4	0.00016	9606.ENSP00000216037,9606.ENSP00000230990,9606.ENSP00000244869,9606.ENSP00000252809,9606.ENSP00000256458,9606.ENSP00000263056,9606.ENSP00000264711,9606.ENSP00000274289,9606.ENSP00000279488,9606.ENSP00000321026,9606.ENSP00000326737,9606.ENSP00000344352,9606.ENSP00000356438,9606.ENSP00000356954,9606.ENSP00000358022,9606.ENSP00000358596,9606.ENSP00000360025,9606.ENSP00000360266,9606.ENSP00000360762,…	XBP1,HBEGF,EREG,GDF15,IRAK2,MAP3K8,DNAJC27,PLK2,DUSP6,LURAP1L,TNFRSF12A,ATF3,PTGS2,CTGF,MCL1,DUSP5,GADD45A,JUN,ANKRD1,ZC3H12A,EDN1,XDH,CYR61,CDKN2AIP,UBC,DDIT3,MAP3K14
GO:0043618	regulation of transcription from RNA polymerase II promoter in response to stress	6	67	1.13	0.00016	9606.ENSP00000216037,9606.ENSP00000253063,9606.ENSP00000344352,9606.ENSP00000360266,9606.ENSP00000441543,9606.ENSP00000448665	XBP1,SESN2,ATF3,JUN,UBC,DDIT3
GO:0040008	regulation of growth	16	663	0.56	0.00017	9606.ENSP00000216037,9606.ENSP00000230990,9606.ENSP00000252809,9606.ENSP00000253063,9606.ENSP00000273668,9606.ENSP00000279488,9606.ENSP00000325414,9606.ENSP00000326737,9606.ENSP00000355374,9606.ENSP00000355866,9606.ENSP00000356832,9606.ENSP00000356954,9606.ENSP00000364591,9606.ENSP00000368683,9606.ENSP00000398736,9606.ENSP00000427108	XBP1,HBEGF,GDF15,SESN2,EAF2,DUSP6,SERTAD3,TNFRSF12A,OSGIN1,DUSP10,SGK1,CTGF,TSPYL2,EDN1,CYR61,CDKN2AIP
GO:0043410	positive regulation of MAPK cascade	14	512	0.62	0.00017	9606.ENSP00000252809,9606.ENSP00000256458,9606.ENSP00000263056,9606.ENSP00000264711,9606.ENSP00000279488,9606.ENSP00000356954,9606.ENSP00000358596,9606.ENSP00000360025,9606.ENSP00000360266,9606.ENSP00000362179,9606.ENSP00000368683,9606.ENSP00000368727,9606.ENSP00000441543,9606.ENSP00000482657	GDF15,IRAK2,MAP3K8,DNAJC27,DUSP6,CTGF,DUSP5,GADD45A,JUN,ZC3H12A,EDN1,XDH,UBC,MAP3K14
GO:0006915	apoptotic process	19	915	0.5	0.00019	9606.ENSP00000200453,9606.ENSP00000216037,9606.ENSP00000234420,9606.ENSP00000259874,9606.ENSP00000263339,9606.ENSP00000272233,9606.ENSP00000273153,9606.ENSP00000273668,9606.ENSP00000307305,9606.ENSP00000326737,9606.ENSP00000351209,9606.ENSP00000356832,9606.ENSP00000358022,9606.ENSP00000360025,9606.ENSP00000360266,9606.ENSP00000362179,9606.ENSP00000398736,9606.ENSP00000448665,9606.ENSP00000481570	PPP1R15A,XBP1,MSH6,IER3,IL1A,RHOB,CSRNP1,EAF2,DDIT4,TNFRSF12A,EPHA2,SGK1,MCL1,GADD45A,JUN,ZC3H12A,CYR61,DDIT3,TNFAIP3
GO:0045786	negative regulation of cell cycle	14	517	0.61	0.00019	9606.ENSP00000200453,9606.ENSP00000239223,9606.ENSP00000272233,9606.ENSP00000274289,9606.ENSP00000306512,9606.ENSP00000337862,9606.ENSP00000338807,9606.ENSP00000349547,9606.ENSP00000356438,9606.ENSP00000360025,9606.ENSP00000364591,9606.ENSP00000403683,9606.ENSP00000448665,9606.ENSP00000481570	PPP1R15A,DUSP1,RHOB,PLK2,CXCL8,OVOL1,ZBTB49,RASSF1,PTGS2,GADD45A,TSPYL2,NABP1,DDIT3,TNFAIP3
GO:0006355	regulation of transcription, DNA-templated	45	3661	0.27	0.0002	9606.ENSP00000216037,9606.ENSP00000228437,9606.ENSP00000242480,9606.ENSP00000244869,9606.ENSP00000245919,9606.ENSP00000252809,9606.ENSP00000253063,9606.ENSP00000256458,9606.ENSP00000256495,9606.ENSP00000263339,9606.ENSP00000264444,9606.ENSP00000270162,9606.ENSP00000273153,9606.ENSP00000273668,9606.ENSP00000277746,9606.ENSP00000307235,9606.ENSP00000310170,9606.ENSP00000325414,9606.ENSP00000337862,…	XBP1,PRDM4,EGR2,EREG,FOSB,GDF15,SESN2,IRAK2,BHLHE40,IL1A,MXD1,SIK1,CSRNP1,EAF2,NRBF2,EIF2AK3,FOSL1,SERTAD3,OVOL1,ZBTB49,ATF3,INSIG1,MAFF,CREB5,SERTAD1,TSC22D2,SGK1,JUN,ANKRD1,TSC22D3,ZC3H12A,ZBTB43,TSPYL2,ZNF165,EDN1,ZMYM5,TDG,ZNF527,CYR61,KLF6,UBC,DDIT3,ZNF699,TNFAIP3,NR4A3
GO:0031960	response to corticosteroid	8	154	0.9	0.0002	9606.ENSP00000239223,9606.ENSP00000245919,9606.ENSP00000307305,9606.ENSP00000310170,9606.ENSP00000356438,9606.ENSP00000356954,9606.ENSP00000366702,9606.ENSP00000368683	DUSP1,FOSB,DDIT4,FOSL1,PTGS2,CTGF,ERRFI1,EDN1
GO:0043555	regulation of translation in response to stress	4	18	1.53	0.00021	9606.ENSP00000200453,9606.ENSP00000253063,9606.ENSP00000307235,9606.ENSP00000473631	PPP1R15A,SESN2,EIF2AK3,DNAJC3
GO:0010632	regulation of epithelial cell migration	9	209	0.82	0.00024	9606.ENSP00000230990,9606.ENSP00000272233,9606.ENSP00000274289,9606.ENSP00000351209,9606.ENSP00000355866,9606.ENSP00000356438,9606.ENSP00000360266,9606.ENSP00000362179,9606.ENSP00000368683	HBEGF,RHOB,PLK2,EPHA2,DUSP10,PTGS2,JUN,ZC3H12A,EDN1
GO:0009607	response to biotic stimulus	22	1206	0.44	0.00026	9606.ENSP00000216037,9606.ENSP00000227752,9606.ENSP00000256458,9606.ENSP00000296026,9606.ENSP00000306512,9606.ENSP00000307235,9606.ENSP00000307305,9606.ENSP00000310170,9606.ENSP00000312988,9606.ENSP00000331748,9606.ENSP00000355866,9606.ENSP00000356438,9606.ENSP00000360266,9606.ENSP00000360762,9606.ENSP00000362179,9606.ENSP00000368683,9606.ENSP00000381282,9606.ENSP00000427279,9606.ENSP00000448665,…	XBP1,IL10RA,IRAK2,CXCL3,CXCL8,EIF2AK3,DDIT4,FOSL1,NFKBIB,RAB12,DUSP10,PTGS2,JUN,ANKRD1,ZC3H12A,EDN1,VIMP,CXCL2,DDIT3,DNAJC3,TNFAIP3,MAP3K14
GO:0009967	positive regulation of signal transduction	25	1493	0.4	0.00026	9606.ENSP00000216037,9606.ENSP00000230990,9606.ENSP00000244869,9606.ENSP00000252809,9606.ENSP00000256458,9606.ENSP00000263056,9606.ENSP00000264711,9606.ENSP00000279488,9606.ENSP00000321026,9606.ENSP00000326737,9606.ENSP00000344352,9606.ENSP00000356954,9606.ENSP00000358022,9606.ENSP00000358596,9606.ENSP00000360025,9606.ENSP00000360266,9606.ENSP00000360762,9606.ENSP00000362179,9606.ENSP00000368683,…	XBP1,HBEGF,EREG,GDF15,IRAK2,MAP3K8,DNAJC27,DUSP6,LURAP1L,TNFRSF12A,ATF3,CTGF,MCL1,DUSP5,GADD45A,JUN,ANKRD1,ZC3H12A,EDN1,XDH,CYR61,CDKN2AIP,UBC,DDIT3,MAP3K14
GO:0042127	regulation of cell population proliferation	26	1594	0.39	0.00026	9606.ENSP00000216037,9606.ENSP00000230990,9606.ENSP00000239223,9606.ENSP00000244869,9606.ENSP00000263339,9606.ENSP00000273668,9606.ENSP00000296026,9606.ENSP00000306512,9606.ENSP00000310170,9606.ENSP00000337862,9606.ENSP00000338807,9606.ENSP00000344352,9606.ENSP00000350633,9606.ENSP00000355866,9606.ENSP00000356438,9606.ENSP00000356832,9606.ENSP00000356954,9606.ENSP00000359216,9606.ENSP00000360266,…	XBP1,HBEGF,DUSP1,EREG,IL1A,EAF2,CXCL3,CXCL8,FOSL1,OVOL1,ZBTB49,ATF3,SERTAD1,DUSP10,PTGS2,SGK1,CTGF,PTBP2,JUN,ERRFI1,EDN1,XDH,CYR61,CXCL2,TNFAIP3,NR4A3
GO:0001934	positive regulation of protein phosphorylation	19	941	0.49	0.00027	9606.ENSP00000216037,9606.ENSP00000230990,9606.ENSP00000244869,9606.ENSP00000252809,9606.ENSP00000256458,9606.ENSP00000263056,9606.ENSP00000264711,9606.ENSP00000279488,9606.ENSP00000356438,9606.ENSP00000356954,9606.ENSP00000358596,9606.ENSP00000360025,9606.ENSP00000360266,9606.ENSP00000362179,9606.ENSP00000368683,9606.ENSP00000368727,9606.ENSP00000398736,9606.ENSP00000441543,9606.ENSP00000482657	XBP1,HBEGF,EREG,GDF15,IRAK2,MAP3K8,DNAJC27,DUSP6,PTGS2,CTGF,DUSP5,GADD45A,JUN,ZC3H12A,EDN1,XDH,CYR61,UBC,MAP3K14
GO:0035239	tube morphogenesis	15	615	0.57	0.00027	9606.ENSP00000216037,9606.ENSP00000244869,9606.ENSP00000272233,9606.ENSP00000306512,9606.ENSP00000307235,9606.ENSP00000326737,9606.ENSP00000351209,9606.ENSP00000356438,9606.ENSP00000356954,9606.ENSP00000360266,9606.ENSP00000362179,9606.ENSP00000368683,9606.ENSP00000398736,9606.ENSP00000420612,9606.ENSP00000482027	XBP1,EREG,RHOB,CXCL8,EIF2AK3,TNFRSF12A,EPHA2,PTGS2,CTGF,JUN,ZC3H12A,EDN1,CYR61,TIPARP,NR4A3
GO:0044092	negative regulation of molecular function	21	1119	0.45	0.00027	9606.ENSP00000200453,9606.ENSP00000239223,9606.ENSP00000240100,9606.ENSP00000256458,9606.ENSP00000256495,9606.ENSP00000270162,9606.ENSP00000279488,9606.ENSP00000355866,9606.ENSP00000356438,9606.ENSP00000358596,9606.ENSP00000360025,9606.ENSP00000360266,9606.ENSP00000362179,9606.ENSP00000366702,9606.ENSP00000376611,9606.ENSP00000379201,9606.ENSP00000409555,9606.ENSP00000446479,9606.ENSP00000448665,…	PPP1R15A,DUSP1,DUSP4,IRAK2,BHLHE40,SIK1,DUSP6,DUSP10,PTGS2,DUSP5,GADD45A,JUN,ZC3H12A,ERRFI1,TDG,VCPKMT,HERPUD1,FICD,DDIT3,DNAJC3,TNFAIP3
GO:0043066	negative regulation of apoptotic process	18	859	0.5	0.00028	9606.ENSP00000216037,9606.ENSP00000239223,9606.ENSP00000259874,9606.ENSP00000263339,9606.ENSP00000274289,9606.ENSP00000356438,9606.ENSP00000358022,9606.ENSP00000360266,9606.ENSP00000361458,9606.ENSP00000362179,9606.ENSP00000368683,9606.ENSP00000381282,9606.ENSP00000398736,9606.ENSP00000409555,9606.ENSP00000441543,9606.ENSP00000473631,9606.ENSP00000481570,9606.ENSP00000482027	XBP1,DUSP1,IER3,IL1A,PLK2,PTGS2,MCL1,JUN,TSC22D3,ZC3H12A,EDN1,VIMP,CYR61,HERPUD1,UBC,DNAJC3,TNFAIP3,NR4A3
GO:0006366	transcription by RNA polymerase II	17	784	0.52	0.00031	9606.ENSP00000216037,9606.ENSP00000228437,9606.ENSP00000242480,9606.ENSP00000245919,9606.ENSP00000273153,9606.ENSP00000273668,9606.ENSP00000277746,9606.ENSP00000310170,9606.ENSP00000344352,9606.ENSP00000345393,9606.ENSP00000350359,9606.ENSP00000356954,9606.ENSP00000360266,9606.ENSP00000403683,9606.ENSP00000419923,9606.ENSP00000448665,9606.ENSP00000482027	XBP1,PRDM4,EGR2,FOSB,CSRNP1,EAF2,NRBF2,FOSL1,ATF3,MAFF,CREB5,CTGF,JUN,NABP1,KLF6,DDIT3,NR4A3
GO:0044093	positive regulation of molecular function	27	1713	0.38	0.00031	9606.ENSP00000200453,9606.ENSP00000234420,9606.ENSP00000244869,9606.ENSP00000252809,9606.ENSP00000256458,9606.ENSP00000263056,9606.ENSP00000265138,9606.ENSP00000274289,9606.ENSP00000279488,9606.ENSP00000307235,9606.ENSP00000310170,9606.ENSP00000351209,9606.ENSP00000356529,9606.ENSP00000356832,9606.ENSP00000356954,9606.ENSP00000358596,9606.ENSP00000360025,9606.ENSP00000360266,9606.ENSP00000366702,…	PPP1R15A,MSH6,EREG,GDF15,IRAK2,MAP3K8,ARRDC3,PLK2,DUSP6,EIF2AK3,FOSL1,EPHA2,RGS16,SGK1,CTGF,DUSP5,GADD45A,JUN,ERRFI1,EDN1,XDH,CYR61,HERPUD1,DCUN1D2,UBC,DDIT3,MAP3K14
GO:0060548	negative regulation of cell death	19	953	0.48	0.00031	9606.ENSP00000216037,9606.ENSP00000239223,9606.ENSP00000259874,9606.ENSP00000263339,9606.ENSP00000274289,9606.ENSP00000356438,9606.ENSP00000356954,9606.ENSP00000358022,9606.ENSP00000360266,9606.ENSP00000361458,9606.ENSP00000362179,9606.ENSP00000368683,9606.ENSP00000381282,9606.ENSP00000398736,9606.ENSP00000409555,9606.ENSP00000441543,9606.ENSP00000473631,9606.ENSP00000481570,9606.ENSP00000482027	XBP1,DUSP1,IER3,IL1A,PLK2,PTGS2,CTGF,MCL1,JUN,TSC22D3,ZC3H12A,EDN1,VIMP,CYR61,HERPUD1,UBC,DNAJC3,TNFAIP3,NR4A3
GO:0071345	cellular response to cytokine stimulus	19	953	0.48	0.00031	9606.ENSP00000216037,9606.ENSP00000227752,9606.ENSP00000244869,9606.ENSP00000256458,9606.ENSP00000263056,9606.ENSP00000263339,9606.ENSP00000296026,9606.ENSP00000306512,9606.ENSP00000326737,9606.ENSP00000331748,9606.ENSP00000356438,9606.ENSP00000358022,9606.ENSP00000360762,9606.ENSP00000362179,9606.ENSP00000368683,9606.ENSP00000369820,9606.ENSP00000427279,9606.ENSP00000441543,9606.ENSP00000482657	XBP1,IL10RA,EREG,IRAK2,MAP3K8,IL1A,CXCL3,CXCL8,TNFRSF12A,RAB12,PTGS2,MCL1,ANKRD1,ZC3H12A,EDN1,PIGA,CXCL2,UBC,MAP3K14
GO:0045765	regulation of angiogenesis	10	277	0.74	0.00032	9606.ENSP00000216037,9606.ENSP00000263339,9606.ENSP00000272233,9606.ENSP00000274289,9606.ENSP00000306512,9606.ENSP00000326737,9606.ENSP00000351209,9606.ENSP00000356438,9606.ENSP00000362179,9606.ENSP00000481570	XBP1,IL1A,RHOB,PLK2,CXCL8,TNFRSF12A,EPHA2,PTGS2,ZC3H12A,TNFAIP3
GO:0010628	positive regulation of gene expression	28	1826	0.37	0.00034	9606.ENSP00000200453,9606.ENSP00000216037,9606.ENSP00000228437,9606.ENSP00000242480,9606.ENSP00000245919,9606.ENSP00000253063,9606.ENSP00000263339,9606.ENSP00000273153,9606.ENSP00000273668,9606.ENSP00000307235,9606.ENSP00000310170,9606.ENSP00000325414,9606.ENSP00000338807,9606.ENSP00000344352,9606.ENSP00000344741,9606.ENSP00000345393,9606.ENSP00000350359,9606.ENSP00000350633,9606.ENSP00000356954,…	PPP1R15A,XBP1,PRDM4,EGR2,FOSB,SESN2,IL1A,CSRNP1,EAF2,EIF2AK3,FOSL1,SERTAD3,ZBTB49,ATF3,INSIG1,MAFF,CREB5,SERTAD1,CTGF,JUN,ZC3H12A,EDN1,CYR61,KLF6,UBC,DDIT3,DNAJC3,NR4A3
GO:0036490	regulation of translation in response to endoplasmic reticulum stress	3	6	1.88	0.00035	9606.ENSP00000253063,9606.ENSP00000307235,9606.ENSP00000473631	SESN2,EIF2AK3,DNAJC3
GO:0071396	cellular response to lipid	13	486	0.61	0.00039	9606.ENSP00000216037,9606.ENSP00000256458,9606.ENSP00000306512,9606.ENSP00000307305,9606.ENSP00000312988,9606.ENSP00000344741,9606.ENSP00000360762,9606.ENSP00000362179,9606.ENSP00000366702,9606.ENSP00000368683,9606.ENSP00000381282,9606.ENSP00000481570,9606.ENSP00000482027	XBP1,IRAK2,CXCL8,DDIT4,NFKBIB,INSIG1,ANKRD1,ZC3H12A,ERRFI1,EDN1,VIMP,TNFAIP3,NR4A3
GO:0043412	macromolecule modification	40	3197	0.28	0.00045	9606.ENSP00000200453,9606.ENSP00000222803,9606.ENSP00000228437,9606.ENSP00000230990,9606.ENSP00000239223,9606.ENSP00000240100,9606.ENSP00000242480,9606.ENSP00000244869,9606.ENSP00000256458,9606.ENSP00000261845,9606.ENSP00000263056,9606.ENSP00000270162,9606.ENSP00000274289,9606.ENSP00000279488,9606.ENSP00000307235,9606.ENSP00000312021,9606.ENSP00000326813,9606.ENSP00000351209,9606.ENSP00000355866,…	PPP1R15A,FKBP14,PRDM4,HBEGF,DUSP1,DUSP4,EGR2,EREG,IRAK2,MAPK6,MAP3K8,SIK1,PLK2,DUSP6,EIF2AK3,FUT1,YOD1,EPHA2,DUSP10,SGK1,DUSP5,LONRF3,YRDC,ZC3H12A,PIGA,TDG,VCPKMT,PDP1,VIMP,CYR61,DCUN1D2,TIPARP,THUMPD2,PGM3,USP36,UBC,FICD,DNAJC3,TNFAIP3,MAP3K14
GO:0006357	regulation of transcription by RNA polymerase II	35	2633	0.3	0.0005	9606.ENSP00000216037,9606.ENSP00000228437,9606.ENSP00000242480,9606.ENSP00000245919,9606.ENSP00000252809,9606.ENSP00000253063,9606.ENSP00000256495,9606.ENSP00000263339,9606.ENSP00000264444,9606.ENSP00000273153,9606.ENSP00000273668,9606.ENSP00000310170,9606.ENSP00000337862,9606.ENSP00000338807,9606.ENSP00000344352,9606.ENSP00000344741,9606.ENSP00000345393,9606.ENSP00000350359,9606.ENSP00000350633,…	XBP1,PRDM4,EGR2,FOSB,GDF15,SESN2,BHLHE40,IL1A,MXD1,CSRNP1,EAF2,FOSL1,OVOL1,ZBTB49,ATF3,INSIG1,MAFF,CREB5,SERTAD1,TSC22D2,JUN,ANKRD1,TSC22D3,ZC3H12A,ZBTB43,ZNF165,EDN1,ZMYM5,TDG,CYR61,KLF6,UBC,DDIT3,ZNF699,NR4A3
GO:0097190	apoptotic signaling pathway	10	295	0.71	0.00051	9606.ENSP00000200453,9606.ENSP00000216037,9606.ENSP00000234420,9606.ENSP00000263339,9606.ENSP00000307305,9606.ENSP00000326737,9606.ENSP00000351209,9606.ENSP00000358022,9606.ENSP00000360266,9606.ENSP00000448665	PPP1R15A,XBP1,MSH6,IL1A,DDIT4,TNFRSF12A,EPHA2,MCL1,JUN,DDIT3
GO:0050793	regulation of developmental process	33	2416	0.32	0.00052	9606.ENSP00000216037,9606.ENSP00000234420,9606.ENSP00000244869,9606.ENSP00000252809,9606.ENSP00000261845,9606.ENSP00000263339,9606.ENSP00000270162,9606.ENSP00000272233,9606.ENSP00000273668,9606.ENSP00000274289,9606.ENSP00000279488,9606.ENSP00000306512,9606.ENSP00000307235,9606.ENSP00000326737,9606.ENSP00000344741,9606.ENSP00000345393,9606.ENSP00000351209,9606.ENSP00000355866,9606.ENSP00000356438,…	XBP1,MSH6,EREG,GDF15,MAPK6,IL1A,SIK1,RHOB,EAF2,PLK2,DUSP6,CXCL8,EIF2AK3,TNFRSF12A,INSIG1,MAFF,EPHA2,DUSP10,PTGS2,CTGF,JUN,ANKRD1,TSC22D3,ZC3H12A,ERRFI1,EDN1,XDH,ZMYM5,TDG,CYR61,DDIT3,TNFAIP3,NR4A3
GO:2000026	regulation of multicellular organismal development	28	1876	0.35	0.00052	9606.ENSP00000216037,9606.ENSP00000234420,9606.ENSP00000261845,9606.ENSP00000263339,9606.ENSP00000272233,9606.ENSP00000273668,9606.ENSP00000274289,9606.ENSP00000279488,9606.ENSP00000306512,9606.ENSP00000307235,9606.ENSP00000326737,9606.ENSP00000345393,9606.ENSP00000351209,9606.ENSP00000355866,9606.ENSP00000356438,9606.ENSP00000356954,9606.ENSP00000360266,9606.ENSP00000360762,9606.ENSP00000361458,…	XBP1,MSH6,MAPK6,IL1A,RHOB,EAF2,PLK2,DUSP6,CXCL8,EIF2AK3,TNFRSF12A,MAFF,EPHA2,DUSP10,PTGS2,CTGF,JUN,ANKRD1,TSC22D3,ZC3H12A,ERRFI1,EDN1,XDH,TDG,CYR61,DDIT3,TNFAIP3,NR4A3
GO:0036498	IRE1-mediated unfolded protein response	5	52	1.16	0.00054	9606.ENSP00000216037,9606.ENSP00000222803,9606.ENSP00000249356,9606.ENSP00000364591,9606.ENSP00000473631	XBP1,FKBP14,DNAJB9,TSPYL2,DNAJC3
GO:0070848	response to growth factor	13	507	0.59	0.00057	9606.ENSP00000216037,9606.ENSP00000252809,9606.ENSP00000279488,9606.ENSP00000306512,9606.ENSP00000307305,9606.ENSP00000351209,9606.ENSP00000356954,9606.ENSP00000360266,9606.ENSP00000360762,9606.ENSP00000366702,9606.ENSP00000368683,9606.ENSP00000405738,9606.ENSP00000441543	XBP1,GDF15,DUSP6,CXCL8,DDIT4,EPHA2,CTGF,JUN,ANKRD1,ERRFI1,EDN1,ESRP1,UBC
GO:0006974	cellular response to DNA damage stimulus	16	749	0.51	0.00061	9606.ENSP00000200453,9606.ENSP00000234420,9606.ENSP00000253063,9606.ENSP00000274289,9606.ENSP00000307305,9606.ENSP00000349547,9606.ENSP00000351209,9606.ENSP00000356832,9606.ENSP00000358022,9606.ENSP00000360025,9606.ENSP00000362179,9606.ENSP00000376611,9606.ENSP00000403683,9606.ENSP00000427108,9606.ENSP00000441543,9606.ENSP00000448665	PPP1R15A,MSH6,SESN2,PLK2,DDIT4,RASSF1,EPHA2,SGK1,MCL1,GADD45A,ZC3H12A,TDG,NABP1,CDKN2AIP,UBC,DDIT3
GO:0036003	positive regulation of transcription from RNA polymerase II promoter in response to stress	4	26	1.37	0.00063	9606.ENSP00000216037,9606.ENSP00000253063,9606.ENSP00000344352,9606.ENSP00000448665	XBP1,SESN2,ATF3,DDIT3
GO:0010634	positive regulation of epithelial cell migration	7	136	0.89	0.00065	9606.ENSP00000230990,9606.ENSP00000272233,9606.ENSP00000274289,9606.ENSP00000356438,9606.ENSP00000360266,9606.ENSP00000362179,9606.ENSP00000368683	HBEGF,RHOB,PLK2,PTGS2,JUN,ZC3H12A,EDN1
GO:0051239	regulation of multicellular organismal process	36	2788	0.29	0.00065	9606.ENSP00000216037,9606.ENSP00000230990,9606.ENSP00000234420,9606.ENSP00000242480,9606.ENSP00000244869,9606.ENSP00000252809,9606.ENSP00000261845,9606.ENSP00000263339,9606.ENSP00000265138,9606.ENSP00000272233,9606.ENSP00000273668,9606.ENSP00000274289,9606.ENSP00000279488,9606.ENSP00000306512,9606.ENSP00000307235,9606.ENSP00000326737,9606.ENSP00000345393,9606.ENSP00000351209,9606.ENSP00000355866,…	XBP1,HBEGF,MSH6,EGR2,EREG,GDF15,MAPK6,IL1A,ARRDC3,RHOB,EAF2,PLK2,DUSP6,CXCL8,EIF2AK3,TNFRSF12A,MAFF,EPHA2,DUSP10,PTGS2,SGK1,CTGF,JUN,ANKRD1,TSC22D3,ZC3H12A,ERRFI1,EDN1,XDH,TDG,HRH1,VIMP,CYR61,DDIT3,TNFAIP3,NR4A3
GO:0034654	nucleobase-containing compound biosynthetic process	38	3031	0.28	0.0007	9606.ENSP00000216037,9606.ENSP00000228437,9606.ENSP00000242480,9606.ENSP00000244869,9606.ENSP00000245919,9606.ENSP00000256495,9606.ENSP00000264444,9606.ENSP00000273153,9606.ENSP00000273668,9606.ENSP00000277746,9606.ENSP00000310170,9606.ENSP00000312988,9606.ENSP00000325414,9606.ENSP00000337862,9606.ENSP00000338807,9606.ENSP00000344352,9606.ENSP00000345393,9606.ENSP00000350359,9606.ENSP00000350633,…	XBP1,PRDM4,EGR2,EREG,FOSB,BHLHE40,MXD1,CSRNP1,EAF2,NRBF2,FOSL1,NFKBIB,SERTAD3,OVOL1,ZBTB49,ATF3,MAFF,CREB5,SERTAD1,PTGS2,UAP1,CTGF,JUN,ZC3H12A,ZBTB43,TSPYL2,ZNF165,XDH,ZMYM5,TDG,ZNF527,NABP1,KLF6,PGM3,UBC,DDIT3,ZNF699,NR4A3
GO:0051384	response to glucocorticoid	7	138	0.89	0.0007	9606.ENSP00000239223,9606.ENSP00000245919,9606.ENSP00000307305,9606.ENSP00000310170,9606.ENSP00000356438,9606.ENSP00000366702,9606.ENSP00000368683	DUSP1,FOSB,DDIT4,FOSL1,PTGS2,ERRFI1,EDN1
GO:1900101	regulation of endoplasmic reticulum unfolded protein response	4	27	1.35	0.0007	9606.ENSP00000200453,9606.ENSP00000216037,9606.ENSP00000249356,9606.ENSP00000446479	PPP1R15A,XBP1,DNAJB9,FICD
GO:0006469	negative regulation of protein kinase activity	9	254	0.73	0.00086	9606.ENSP00000239223,9606.ENSP00000240100,9606.ENSP00000279488,9606.ENSP00000355866,9606.ENSP00000358596,9606.ENSP00000360025,9606.ENSP00000366702,9606.ENSP00000473631,9606.ENSP00000481570	DUSP1,DUSP4,DUSP6,DUSP10,DUSP5,GADD45A,ERRFI1,DNAJC3,TNFAIP3
GO:0010558	negative regulation of macromolecule biosynthetic process	23	1425	0.39	0.00088	9606.ENSP00000216037,9606.ENSP00000230990,9606.ENSP00000239223,9606.ENSP00000244869,9606.ENSP00000245919,9606.ENSP00000253063,9606.ENSP00000256495,9606.ENSP00000264444,9606.ENSP00000307235,9606.ENSP00000337862,9606.ENSP00000344352,9606.ENSP00000360266,9606.ENSP00000360762,9606.ENSP00000361458,9606.ENSP00000362179,9606.ENSP00000364591,9606.ENSP00000366702,9606.ENSP00000368683,9606.ENSP00000376611,…	XBP1,HBEGF,DUSP1,EREG,FOSB,SESN2,BHLHE40,MXD1,EIF2AK3,OVOL1,ATF3,JUN,ANKRD1,TSC22D3,ZC3H12A,TSPYL2,ERRFI1,EDN1,TDG,VIMP,UBC,DDIT3,NR4A3
GO:0051385	response to mineralocorticoid	4	29	1.32	0.00088	9606.ENSP00000245919,9606.ENSP00000310170,9606.ENSP00000356954,9606.ENSP00000368683	FOSB,FOSL1,CTGF,EDN1
GO:2001233	regulation of apoptotic signaling pathway	11	388	0.63	0.00091	9606.ENSP00000216037,9606.ENSP00000263339,9606.ENSP00000307235,9606.ENSP00000326737,9606.ENSP00000344352,9606.ENSP00000356438,9606.ENSP00000358022,9606.ENSP00000381282,9606.ENSP00000409555,9606.ENSP00000448665,9606.ENSP00000481570	XBP1,IL1A,EIF2AK3,TNFRSF12A,ATF3,PTGS2,MCL1,VIMP,HERPUD1,DDIT3,TNFAIP3
GO:0090023	positive regulation of neutrophil chemotaxis	4	30	1.31	0.00099	9606.ENSP00000296026,9606.ENSP00000306512,9606.ENSP00000368683,9606.ENSP00000427279	CXCL3,CXCL8,EDN1,CXCL2
GO:0043558	regulation of translational initiation in response to stress	3	10	1.66	0.001	9606.ENSP00000200453,9606.ENSP00000307235,9606.ENSP00000473631	PPP1R15A,EIF2AK3,DNAJC3
GO:0007050	cell cycle arrest	7	149	0.85	0.0011	9606.ENSP00000200453,9606.ENSP00000239223,9606.ENSP00000306512,9606.ENSP00000338807,9606.ENSP00000349547,9606.ENSP00000360025,9606.ENSP00000448665	PPP1R15A,DUSP1,CXCL8,ZBTB49,RASSF1,GADD45A,DDIT3
GO:0009719	response to endogenous stimulus	22	1353	0.39	0.0011	9606.ENSP00000216037,9606.ENSP00000239223,9606.ENSP00000242480,9606.ENSP00000244869,9606.ENSP00000245919,9606.ENSP00000252809,9606.ENSP00000253063,9606.ENSP00000270162,9606.ENSP00000306512,9606.ENSP00000307305,9606.ENSP00000310170,9606.ENSP00000356438,9606.ENSP00000356954,9606.ENSP00000360266,9606.ENSP00000360762,9606.ENSP00000366702,9606.ENSP00000368683,9606.ENSP00000380247,9606.ENSP00000381282,…	XBP1,DUSP1,EGR2,EREG,FOSB,GDF15,SESN2,SIK1,CXCL8,DDIT4,FOSL1,PTGS2,CTGF,JUN,ANKRD1,ERRFI1,EDN1,HRH1,VIMP,ESRP1,UBC,NR4A3
GO:0035295	tube development	16	793	0.49	0.0011	9606.ENSP00000216037,9606.ENSP00000244869,9606.ENSP00000272233,9606.ENSP00000306512,9606.ENSP00000307235,9606.ENSP00000326737,9606.ENSP00000351209,9606.ENSP00000356438,9606.ENSP00000356954,9606.ENSP00000360266,9606.ENSP00000362179,9606.ENSP00000366702,9606.ENSP00000368683,9606.ENSP00000398736,9606.ENSP00000420612,9606.ENSP00000482027	XBP1,EREG,RHOB,CXCL8,EIF2AK3,TNFRSF12A,EPHA2,PTGS2,CTGF,JUN,ZC3H12A,ERRFI1,EDN1,CYR61,TIPARP,NR4A3
GO:0043406	positive regulation of MAP kinase activity	9	264	0.71	0.0011	9606.ENSP00000252809,9606.ENSP00000256458,9606.ENSP00000263056,9606.ENSP00000279488,9606.ENSP00000358596,9606.ENSP00000360025,9606.ENSP00000368683,9606.ENSP00000441543,9606.ENSP00000482657	GDF15,IRAK2,MAP3K8,DUSP6,DUSP5,GADD45A,EDN1,UBC,MAP3K14
GO:1901362	organic cyclic compound biosynthetic process	39	3230	0.26	0.0011	9606.ENSP00000216037,9606.ENSP00000228437,9606.ENSP00000242480,9606.ENSP00000244869,9606.ENSP00000245919,9606.ENSP00000256495,9606.ENSP00000264444,9606.ENSP00000273153,9606.ENSP00000273668,9606.ENSP00000277746,9606.ENSP00000310170,9606.ENSP00000312988,9606.ENSP00000325414,9606.ENSP00000337862,9606.ENSP00000338807,9606.ENSP00000344352,9606.ENSP00000344741,9606.ENSP00000345393,9606.ENSP00000350359,…	XBP1,PRDM4,EGR2,EREG,FOSB,BHLHE40,MXD1,CSRNP1,EAF2,NRBF2,FOSL1,NFKBIB,SERTAD3,OVOL1,ZBTB49,ATF3,INSIG1,MAFF,CREB5,SERTAD1,PTGS2,UAP1,CTGF,JUN,ZC3H12A,ZBTB43,TSPYL2,ZNF165,XDH,ZMYM5,TDG,ZNF527,NABP1,KLF6,PGM3,UBC,DDIT3,ZNF699,NR4A3
GO:2000113	negative regulation of cellular macromolecule biosynthetic process	22	1348	0.39	0.0011	9606.ENSP00000216037,9606.ENSP00000230990,9606.ENSP00000239223,9606.ENSP00000244869,9606.ENSP00000245919,9606.ENSP00000253063,9606.ENSP00000256495,9606.ENSP00000264444,9606.ENSP00000307235,9606.ENSP00000337862,9606.ENSP00000344352,9606.ENSP00000360266,9606.ENSP00000360762,9606.ENSP00000361458,9606.ENSP00000362179,9606.ENSP00000364591,9606.ENSP00000368683,9606.ENSP00000376611,9606.ENSP00000381282,…	XBP1,HBEGF,DUSP1,EREG,FOSB,SESN2,BHLHE40,MXD1,EIF2AK3,OVOL1,ATF3,JUN,ANKRD1,TSC22D3,ZC3H12A,TSPYL2,EDN1,TDG,VIMP,UBC,DDIT3,NR4A3
GO:0006464	cellular protein modification process	37	2999	0.27	0.0012	9606.ENSP00000200453,9606.ENSP00000222803,9606.ENSP00000228437,9606.ENSP00000230990,9606.ENSP00000239223,9606.ENSP00000240100,9606.ENSP00000242480,9606.ENSP00000244869,9606.ENSP00000256458,9606.ENSP00000261845,9606.ENSP00000263056,9606.ENSP00000270162,9606.ENSP00000274289,9606.ENSP00000279488,9606.ENSP00000307235,9606.ENSP00000312021,9606.ENSP00000326813,9606.ENSP00000351209,9606.ENSP00000355866,…	PPP1R15A,FKBP14,PRDM4,HBEGF,DUSP1,DUSP4,EGR2,EREG,IRAK2,MAPK6,MAP3K8,SIK1,PLK2,DUSP6,EIF2AK3,FUT1,YOD1,EPHA2,DUSP10,SGK1,DUSP5,LONRF3,ZC3H12A,PIGA,VCPKMT,PDP1,VIMP,CYR61,DCUN1D2,TIPARP,PGM3,USP36,UBC,FICD,DNAJC3,TNFAIP3,MAP3K14
GO:0006983	ER overload response	3	11	1.62	0.0012	9606.ENSP00000307235,9606.ENSP00000381282,9606.ENSP00000448665	EIF2AK3,VIMP,DDIT3
GO:0044267	cellular protein metabolic process	42	3603	0.25	0.0012	9606.ENSP00000200453,9606.ENSP00000216037,9606.ENSP00000222803,9606.ENSP00000228437,9606.ENSP00000230990,9606.ENSP00000239223,9606.ENSP00000240100,9606.ENSP00000242480,9606.ENSP00000244869,9606.ENSP00000249356,9606.ENSP00000256458,9606.ENSP00000261845,9606.ENSP00000263056,9606.ENSP00000270162,9606.ENSP00000274289,9606.ENSP00000279488,9606.ENSP00000307235,9606.ENSP00000312021,9606.ENSP00000326813,…	PPP1R15A,XBP1,FKBP14,PRDM4,HBEGF,DUSP1,DUSP4,EGR2,EREG,DNAJB9,IRAK2,MAPK6,MAP3K8,SIK1,PLK2,DUSP6,EIF2AK3,FUT1,YOD1,RAB12,EPHA2,DUSP10,SGK1,DUSP5,LONRF3,ZC3H12A,PIGA,VCPKMT,PDP1,VIMP,CYR61,HERPUD1,DCUN1D2,TIPARP,PGM3,USP36,UBC,FICD,DDIT3,DNAJC3,TNFAIP3,MAP3K14
GO:0051090	regulation of DNA-binding transcription factor activity	11	403	0.62	0.0012	9606.ENSP00000256458,9606.ENSP00000256495,9606.ENSP00000270162,9606.ENSP00000310170,9606.ENSP00000356832,9606.ENSP00000360266,9606.ENSP00000362179,9606.ENSP00000368683,9606.ENSP00000441543,9606.ENSP00000448665,9606.ENSP00000481570	IRAK2,BHLHE40,SIK1,FOSL1,SGK1,JUN,ZC3H12A,EDN1,UBC,DDIT3,TNFAIP3
GO:1904707	positive regulation of vascular smooth muscle cell proliferation	4	32	1.28	0.0012	9606.ENSP00000216037,9606.ENSP00000360266,9606.ENSP00000368683,9606.ENSP00000482027	XBP1,JUN,EDN1,NR4A3
GO:0009612	response to mechanical stimulus	8	210	0.76	0.0013	9606.ENSP00000245919,9606.ENSP00000310170,9606.ENSP00000356438,9606.ENSP00000360025,9606.ENSP00000360266,9606.ENSP00000360762,9606.ENSP00000368683,9606.ENSP00000482657	FOSB,FOSL1,PTGS2,GADD45A,JUN,ANKRD1,EDN1,MAP3K14
GO:0009653	anatomical structure morphogenesis	28	1992	0.33	0.0013	9606.ENSP00000216037,9606.ENSP00000230990,9606.ENSP00000239223,9606.ENSP00000240100,9606.ENSP00000242480,9606.ENSP00000244869,9606.ENSP00000259874,9606.ENSP00000272233,9606.ENSP00000273153,9606.ENSP00000306512,9606.ENSP00000307235,9606.ENSP00000326737,9606.ENSP00000344741,9606.ENSP00000351209,9606.ENSP00000356438,9606.ENSP00000356832,9606.ENSP00000356954,9606.ENSP00000357842,9606.ENSP00000358596,…	XBP1,HBEGF,DUSP1,DUSP4,EGR2,EREG,IER3,RHOB,CSRNP1,CXCL8,EIF2AK3,TNFRSF12A,INSIG1,EPHA2,PTGS2,SGK1,CTGF,TUFT1,DUSP5,JUN,PARD6B,ANKRD1,ZC3H12A,ERRFI1,EDN1,CYR61,TIPARP,NR4A3
GO:0051707	response to other organism	20	1173	0.41	0.0013	9606.ENSP00000216037,9606.ENSP00000227752,9606.ENSP00000256458,9606.ENSP00000296026,9606.ENSP00000306512,9606.ENSP00000307305,9606.ENSP00000310170,9606.ENSP00000312988,9606.ENSP00000331748,9606.ENSP00000355866,9606.ENSP00000356438,9606.ENSP00000360266,9606.ENSP00000360762,9606.ENSP00000362179,9606.ENSP00000368683,9606.ENSP00000381282,9606.ENSP00000427279,9606.ENSP00000473631,9606.ENSP00000481570,…	XBP1,IL10RA,IRAK2,CXCL3,CXCL8,DDIT4,FOSL1,NFKBIB,RAB12,DUSP10,PTGS2,JUN,ANKRD1,ZC3H12A,EDN1,VIMP,CXCL2,DNAJC3,TNFAIP3,MAP3K14
GO:1901701	cellular response to oxygen-containing compound	17	896	0.46	0.0013	9606.ENSP00000216037,9606.ENSP00000253063,9606.ENSP00000256458,9606.ENSP00000272233,9606.ENSP00000306512,9606.ENSP00000307305,9606.ENSP00000312988,9606.ENSP00000344741,9606.ENSP00000356438,9606.ENSP00000360266,9606.ENSP00000360762,9606.ENSP00000362179,9606.ENSP00000366702,9606.ENSP00000368683,9606.ENSP00000381282,9606.ENSP00000481570,9606.ENSP00000482027	XBP1,SESN2,IRAK2,RHOB,CXCL8,DDIT4,NFKBIB,INSIG1,PTGS2,JUN,ANKRD1,ZC3H12A,ERRFI1,EDN1,VIMP,TNFAIP3,NR4A3
GO:0006351	transcription, DNA-templated	33	2569	0.29	0.0014	9606.ENSP00000216037,9606.ENSP00000228437,9606.ENSP00000242480,9606.ENSP00000244869,9606.ENSP00000245919,9606.ENSP00000256495,9606.ENSP00000264444,9606.ENSP00000273153,9606.ENSP00000273668,9606.ENSP00000277746,9606.ENSP00000310170,9606.ENSP00000312988,9606.ENSP00000325414,9606.ENSP00000337862,9606.ENSP00000338807,9606.ENSP00000344352,9606.ENSP00000345393,9606.ENSP00000350359,9606.ENSP00000350633,…	XBP1,PRDM4,EGR2,EREG,FOSB,BHLHE40,MXD1,CSRNP1,EAF2,NRBF2,FOSL1,NFKBIB,SERTAD3,OVOL1,ZBTB49,ATF3,MAFF,CREB5,SERTAD1,CTGF,JUN,ZC3H12A,ZBTB43,TSPYL2,ZNF165,ZMYM5,TDG,ZNF527,NABP1,KLF6,DDIT3,ZNF699,NR4A3
GO:0043085	positive regulation of catalytic activity	22	1381	0.38	0.0014	9606.ENSP00000200453,9606.ENSP00000234420,9606.ENSP00000244869,9606.ENSP00000252809,9606.ENSP00000256458,9606.ENSP00000263056,9606.ENSP00000265138,9606.ENSP00000279488,9606.ENSP00000307235,9606.ENSP00000351209,9606.ENSP00000356529,9606.ENSP00000356954,9606.ENSP00000358596,9606.ENSP00000360025,9606.ENSP00000360266,9606.ENSP00000366702,9606.ENSP00000368683,9606.ENSP00000368727,9606.ENSP00000398736,…	PPP1R15A,MSH6,EREG,GDF15,IRAK2,MAP3K8,ARRDC3,DUSP6,EIF2AK3,EPHA2,RGS16,CTGF,DUSP5,GADD45A,JUN,ERRFI1,EDN1,XDH,CYR61,DCUN1D2,UBC,MAP3K14
GO:0097193	intrinsic apoptotic signaling pathway	7	158	0.83	0.0014	9606.ENSP00000200453,9606.ENSP00000216037,9606.ENSP00000234420,9606.ENSP00000307305,9606.ENSP00000351209,9606.ENSP00000358022,9606.ENSP00000448665	PPP1R15A,XBP1,MSH6,DDIT4,EPHA2,MCL1,DDIT3
GO:1900744	regulation of p38MAPK cascade	4	34	1.25	0.0014	9606.ENSP00000355866,9606.ENSP00000360025,9606.ENSP00000362179,9606.ENSP00000368727	DUSP10,GADD45A,ZC3H12A,XDH
GO:2001242	regulation of intrinsic apoptotic signaling pathway	7	159	0.82	0.0014	9606.ENSP00000216037,9606.ENSP00000307235,9606.ENSP00000356438,9606.ENSP00000358022,9606.ENSP00000381282,9606.ENSP00000409555,9606.ENSP00000448665	XBP1,EIF2AK3,PTGS2,MCL1,VIMP,HERPUD1,DDIT3
GO:0010035	response to inorganic substance	12	491	0.57	0.0015	9606.ENSP00000239223,9606.ENSP00000245919,9606.ENSP00000263339,9606.ENSP00000272233,9606.ENSP00000307235,9606.ENSP00000310170,9606.ENSP00000356438,9606.ENSP00000360266,9606.ENSP00000362179,9606.ENSP00000368683,9606.ENSP00000481570,9606.ENSP00000482027	DUSP1,FOSB,IL1A,RHOB,EIF2AK3,FOSL1,PTGS2,JUN,ZC3H12A,EDN1,TNFAIP3,NR4A3
GO:0032675	regulation of interleukin-6 production	6	112	0.91	0.0015	9606.ENSP00000216037,9606.ENSP00000244869,9606.ENSP00000263339,9606.ENSP00000362179,9606.ENSP00000381282,9606.ENSP00000481570	XBP1,EREG,IL1A,ZC3H12A,VIMP,TNFAIP3
GO:0042542	response to hydrogen peroxide	6	112	0.91	0.0015	9606.ENSP00000239223,9606.ENSP00000272233,9606.ENSP00000310170,9606.ENSP00000360266,9606.ENSP00000481570,9606.ENSP00000482027	DUSP1,RHOB,FOSL1,JUN,TNFAIP3,NR4A3
GO:0045766	positive regulation of angiogenesis	7	162	0.82	0.0015	9606.ENSP00000216037,9606.ENSP00000263339,9606.ENSP00000272233,9606.ENSP00000274289,9606.ENSP00000306512,9606.ENSP00000356438,9606.ENSP00000362179	XBP1,IL1A,RHOB,PLK2,CXCL8,PTGS2,ZC3H12A
GO:0045862	positive regulation of proteolysis	10	347	0.64	0.0015	9606.ENSP00000216037,9606.ENSP00000274289,9606.ENSP00000307235,9606.ENSP00000314619,9606.ENSP00000356954,9606.ENSP00000360690,9606.ENSP00000362179,9606.ENSP00000368727,9606.ENSP00000398736,9606.ENSP00000409555	XBP1,PLK2,EIF2AK3,ZFAND2A,CTGF,LONRF3,ZC3H12A,XDH,CYR61,HERPUD1
GO:1900182	positive regulation of protein localization to nucleus	5	69	1.04	0.0015	9606.ENSP00000216037,9606.ENSP00000253063,9606.ENSP00000307235,9606.ENSP00000356438,9606.ENSP00000362179	XBP1,SESN2,EIF2AK3,PTGS2,ZC3H12A
GO:1990440	positive regulation of transcription from RNA polymerase II promoter in response to endoplasmic reticulum stress	3	12	1.58	0.0015	9606.ENSP00000216037,9606.ENSP00000344352,9606.ENSP00000448665	XBP1,ATF3,DDIT3
GO:0007169	transmembrane receptor protein tyrosine kinase signaling pathway	12	499	0.56	0.0016	9606.ENSP00000216037,9606.ENSP00000230990,9606.ENSP00000244869,9606.ENSP00000252809,9606.ENSP00000273153,9606.ENSP00000307235,9606.ENSP00000307305,9606.ENSP00000351209,9606.ENSP00000356954,9606.ENSP00000405738,9606.ENSP00000420612,9606.ENSP00000482027	XBP1,HBEGF,EREG,GDF15,CSRNP1,EIF2AK3,DDIT4,EPHA2,CTGF,ESRP1,TIPARP,NR4A3
GO:0071495	cellular response to endogenous stimulus	19	1106	0.42	0.0016	9606.ENSP00000216037,9606.ENSP00000239223,9606.ENSP00000245919,9606.ENSP00000252809,9606.ENSP00000253063,9606.ENSP00000270162,9606.ENSP00000306512,9606.ENSP00000307305,9606.ENSP00000356438,9606.ENSP00000356954,9606.ENSP00000360266,9606.ENSP00000360762,9606.ENSP00000366702,9606.ENSP00000368683,9606.ENSP00000380247,9606.ENSP00000381282,9606.ENSP00000405738,9606.ENSP00000441543,9606.ENSP00000482027	XBP1,DUSP1,FOSB,GDF15,SESN2,SIK1,CXCL8,DDIT4,PTGS2,CTGF,JUN,ANKRD1,ERRFI1,EDN1,HRH1,VIMP,ESRP1,UBC,NR4A3
GO:0042149	cellular response to glucose starvation	4	37	1.21	0.0017	9606.ENSP00000216037,9606.ENSP00000253063,9606.ENSP00000307235,9606.ENSP00000362179	XBP1,SESN2,EIF2AK3,ZC3H12A
GO:1900102	negative regulation of endoplasmic reticulum unfolded protein response	3	13	1.54	0.0017	9606.ENSP00000200453,9606.ENSP00000216037,9606.ENSP00000249356	PPP1R15A,XBP1,DNAJB9
GO:1905898	positive regulation of response to endoplasmic reticulum stress	4	37	1.21	0.0017	9606.ENSP00000200453,9606.ENSP00000216037,9606.ENSP00000409555,9606.ENSP00000448665	PPP1R15A,XBP1,HERPUD1,DDIT3
GO:1901652	response to peptide	11	431	0.59	0.0019	9606.ENSP00000216037,9606.ENSP00000242480,9606.ENSP00000244869,9606.ENSP00000253063,9606.ENSP00000356438,9606.ENSP00000356954,9606.ENSP00000366702,9606.ENSP00000368683,9606.ENSP00000381282,9606.ENSP00000481570,9606.ENSP00000482027	XBP1,EGR2,EREG,SESN2,PTGS2,CTGF,ERRFI1,EDN1,VIMP,TNFAIP3,NR4A3
GO:0043434	response to peptide hormone	10	362	0.62	0.002	9606.ENSP00000216037,9606.ENSP00000242480,9606.ENSP00000244869,9606.ENSP00000253063,9606.ENSP00000356438,9606.ENSP00000356954,9606.ENSP00000366702,9606.ENSP00000368683,9606.ENSP00000381282,9606.ENSP00000482027	XBP1,EGR2,EREG,SESN2,PTGS2,CTGF,ERRFI1,EDN1,VIMP,NR4A3
GO:0009725	response to hormone	16	854	0.45	0.0021	9606.ENSP00000216037,9606.ENSP00000239223,9606.ENSP00000242480,9606.ENSP00000244869,9606.ENSP00000245919,9606.ENSP00000253063,9606.ENSP00000270162,9606.ENSP00000307305,9606.ENSP00000310170,9606.ENSP00000356438,9606.ENSP00000356954,9606.ENSP00000360266,9606.ENSP00000366702,9606.ENSP00000368683,9606.ENSP00000381282,9606.ENSP00000482027	XBP1,DUSP1,EGR2,EREG,FOSB,SESN2,SIK1,DDIT4,FOSL1,PTGS2,CTGF,JUN,ERRFI1,EDN1,VIMP,NR4A3
GO:0045598	regulation of fat cell differentiation	6	120	0.88	0.0021	9606.ENSP00000216037,9606.ENSP00000344741,9606.ENSP00000355866,9606.ENSP00000356438,9606.ENSP00000362179,9606.ENSP00000448665	XBP1,INSIG1,DUSP10,PTGS2,ZC3H12A,DDIT3
GO:0032501	multicellular organismal process	63	6507	0.17	0.0022	9606.ENSP00000216037,9606.ENSP00000230990,9606.ENSP00000234420,9606.ENSP00000239223,9606.ENSP00000240100,9606.ENSP00000242480,9606.ENSP00000244869,9606.ENSP00000245919,9606.ENSP00000249356,9606.ENSP00000252809,9606.ENSP00000256495,9606.ENSP00000261845,9606.ENSP00000263339,9606.ENSP00000264444,9606.ENSP00000265138,9606.ENSP00000270162,9606.ENSP00000272233,9606.ENSP00000273153,9606.ENSP00000274289,…	XBP1,HBEGF,MSH6,DUSP1,DUSP4,EGR2,EREG,FOSB,DNAJB9,GDF15,BHLHE40,MAPK6,IL1A,MXD1,ARRDC3,SIK1,RHOB,CSRNP1,PLK2,MPZL3,DUSP6,SEC24D,CXCL8,EIF2AK3,DDIT4,FOSL1,TNFRSF12A,OVOL1,ATF3,PEAR1,INSIG1,SPRY4,MAFF,EPHA2,OSGIN1,DUSP10,PTGS2,RGS16,SGK1,CTGF,TUFT1,MCL1,DUSP5,PTBP2,JUN,PARD6B,ANKRD1,SLC25A25,ZC3H12A,ERRFI1,GPCPD1,EDN1,XDH,ZMYM5,HRH1,CYR61,KLF6,TIPARP,PGM3,MANF,DDIT3,TNFAIP3,NR4A3
GO:0031668	cellular response to extracellular stimulus	8	235	0.71	0.0023	9606.ENSP00000216037,9606.ENSP00000253063,9606.ENSP00000307235,9606.ENSP00000310170,9606.ENSP00000344352,9606.ENSP00000356438,9606.ENSP00000360266,9606.ENSP00000362179	XBP1,SESN2,EIF2AK3,FOSL1,ATF3,PTGS2,JUN,ZC3H12A
GO:0042594	response to starvation	7	175	0.78	0.0023	9606.ENSP00000216037,9606.ENSP00000253063,9606.ENSP00000307235,9606.ENSP00000344352,9606.ENSP00000360266,9606.ENSP00000362179,9606.ENSP00000448665	XBP1,SESN2,EIF2AK3,ATF3,JUN,ZC3H12A,DDIT3
GO:0045926	negative regulation of growth	8	235	0.71	0.0023	9606.ENSP00000252809,9606.ENSP00000253063,9606.ENSP00000273668,9606.ENSP00000325414,9606.ENSP00000355374,9606.ENSP00000355866,9606.ENSP00000364591,9606.ENSP00000427108	GDF15,SESN2,EAF2,SERTAD3,OSGIN1,DUSP10,TSPYL2,CDKN2AIP
GO:0007166	cell surface receptor signaling pathway	29	2198	0.3	0.0024	9606.ENSP00000216037,9606.ENSP00000227752,9606.ENSP00000230990,9606.ENSP00000244869,9606.ENSP00000252809,9606.ENSP00000256458,9606.ENSP00000263056,9606.ENSP00000263339,9606.ENSP00000273153,9606.ENSP00000296026,9606.ENSP00000306512,9606.ENSP00000307235,9606.ENSP00000307305,9606.ENSP00000326737,9606.ENSP00000351209,9606.ENSP00000356438,9606.ENSP00000356954,9606.ENSP00000358022,9606.ENSP00000360266,…	XBP1,IL10RA,HBEGF,EREG,GDF15,IRAK2,MAP3K8,IL1A,CSRNP1,CXCL3,CXCL8,EIF2AK3,DDIT4,TNFRSF12A,EPHA2,PTGS2,CTGF,MCL1,JUN,ZC3H12A,EDN1,ESRP1,TIPARP,AMOTL2,CXCL2,UBC,DDIT3,NR4A3,MAP3K14
GO:0051240	positive regulation of multicellular organismal process	23	1551	0.35	0.0024	9606.ENSP00000216037,9606.ENSP00000230990,9606.ENSP00000234420,9606.ENSP00000244869,9606.ENSP00000261845,9606.ENSP00000263339,9606.ENSP00000272233,9606.ENSP00000274289,9606.ENSP00000306512,9606.ENSP00000307235,9606.ENSP00000326737,9606.ENSP00000355866,9606.ENSP00000356438,9606.ENSP00000356954,9606.ENSP00000360266,9606.ENSP00000360762,9606.ENSP00000362179,9606.ENSP00000368683,9606.ENSP00000380247,…	XBP1,HBEGF,MSH6,EREG,MAPK6,IL1A,RHOB,PLK2,CXCL8,EIF2AK3,TNFRSF12A,DUSP10,PTGS2,CTGF,JUN,ANKRD1,ZC3H12A,EDN1,HRH1,CYR61,DDIT3,TNFAIP3,NR4A3
GO:0061041	regulation of wound healing	6	124	0.87	0.0024	9606.ENSP00000216037,9606.ENSP00000230990,9606.ENSP00000326737,9606.ENSP00000355866,9606.ENSP00000368683,9606.ENSP00000481570	XBP1,HBEGF,TNFRSF12A,DUSP10,EDN1,TNFAIP3
GO:0014070	response to organic cyclic compound	16	873	0.44	0.0026	9606.ENSP00000239223,9606.ENSP00000245919,9606.ENSP00000279488,9606.ENSP00000307305,9606.ENSP00000310170,9606.ENSP00000344741,9606.ENSP00000356438,9606.ENSP00000356954,9606.ENSP00000360266,9606.ENSP00000360762,9606.ENSP00000362179,9606.ENSP00000366702,9606.ENSP00000368683,9606.ENSP00000380247,9606.ENSP00000420612,9606.ENSP00000482027	DUSP1,FOSB,DUSP6,DDIT4,FOSL1,INSIG1,PTGS2,CTGF,JUN,ANKRD1,ZC3H12A,ERRFI1,EDN1,HRH1,TIPARP,NR4A3
GO:0045787	positive regulation of cell cycle	10	376	0.61	0.0026	9606.ENSP00000244869,9606.ENSP00000263339,9606.ENSP00000274289,9606.ENSP00000310170,9606.ENSP00000337862,9606.ENSP00000349547,9606.ENSP00000356954,9606.ENSP00000360025,9606.ENSP00000368683,9606.ENSP00000482027	EREG,IL1A,PLK2,FOSL1,OVOL1,RASSF1,CTGF,GADD45A,EDN1,NR4A3
GO:0007167	enzyme linked receptor protein signaling pathway	14	698	0.48	0.0027	9606.ENSP00000216037,9606.ENSP00000230990,9606.ENSP00000244869,9606.ENSP00000252809,9606.ENSP00000273153,9606.ENSP00000307235,9606.ENSP00000307305,9606.ENSP00000351209,9606.ENSP00000356954,9606.ENSP00000360266,9606.ENSP00000405738,9606.ENSP00000420612,9606.ENSP00000441543,9606.ENSP00000482027	XBP1,HBEGF,EREG,GDF15,CSRNP1,EIF2AK3,DDIT4,EPHA2,CTGF,JUN,ESRP1,TIPARP,UBC,NR4A3
GO:0048731	system development	45	4144	0.22	0.0027	9606.ENSP00000216037,9606.ENSP00000230990,9606.ENSP00000234420,9606.ENSP00000242480,9606.ENSP00000244869,9606.ENSP00000249356,9606.ENSP00000261845,9606.ENSP00000265138,9606.ENSP00000270162,9606.ENSP00000272233,9606.ENSP00000273153,9606.ENSP00000274289,9606.ENSP00000306512,9606.ENSP00000307235,9606.ENSP00000307305,9606.ENSP00000310170,9606.ENSP00000326737,9606.ENSP00000337862,9606.ENSP00000344352,…	XBP1,HBEGF,MSH6,EGR2,EREG,DNAJB9,MAPK6,ARRDC3,SIK1,RHOB,CSRNP1,PLK2,CXCL8,EIF2AK3,DDIT4,FOSL1,TNFRSF12A,OVOL1,ATF3,INSIG1,MAFF,EPHA2,DUSP10,PTGS2,SGK1,CTGF,TUFT1,PTBP2,JUN,PARD6B,ANKRD1,SLC25A25,ZC3H12A,ERRFI1,GPCPD1,EDN1,XDH,CYR61,KLF6,TIPARP,PGM3,MANF,DDIT3,TNFAIP3,NR4A3
GO:0071243	cellular response to arsenic-containing substance	3	16	1.45	0.0027	9606.ENSP00000314619,9606.ENSP00000344352,9606.ENSP00000362179	ZFAND2A,ATF3,ZC3H12A
GO:0002684	positive regulation of immune system process	16	882	0.44	0.0028	9606.ENSP00000216037,9606.ENSP00000234420,9606.ENSP00000244869,9606.ENSP00000256458,9606.ENSP00000263056,9606.ENSP00000263339,9606.ENSP00000296026,9606.ENSP00000306512,9606.ENSP00000355866,9606.ENSP00000360266,9606.ENSP00000362179,9606.ENSP00000368683,9606.ENSP00000427279,9606.ENSP00000441543,9606.ENSP00000481570,9606.ENSP00000482027	XBP1,MSH6,EREG,IRAK2,MAP3K8,IL1A,CXCL3,CXCL8,DUSP10,JUN,ZC3H12A,EDN1,CXCL2,UBC,TNFAIP3,NR4A3
GO:0050678	regulation of epithelial cell proliferation	9	311	0.64	0.0028	9606.ENSP00000216037,9606.ENSP00000244869,9606.ENSP00000273668,9606.ENSP00000355866,9606.ENSP00000360266,9606.ENSP00000366702,9606.ENSP00000368727,9606.ENSP00000481570,9606.ENSP00000482027	XBP1,EREG,EAF2,DUSP10,JUN,ERRFI1,XDH,TNFAIP3,NR4A3
GO:0006139	nucleobase-containing compound metabolic process	48	4551	0.2	0.0029	9606.ENSP00000216037,9606.ENSP00000228437,9606.ENSP00000234420,9606.ENSP00000242480,9606.ENSP00000244869,9606.ENSP00000245919,9606.ENSP00000253063,9606.ENSP00000256495,9606.ENSP00000264444,9606.ENSP00000273153,9606.ENSP00000273668,9606.ENSP00000277746,9606.ENSP00000278590,9606.ENSP00000310170,9606.ENSP00000312988,9606.ENSP00000325414,9606.ENSP00000337862,9606.ENSP00000338807,9606.ENSP00000344352,…	XBP1,PRDM4,MSH6,EGR2,EREG,FOSB,SESN2,BHLHE40,MXD1,CSRNP1,EAF2,NRBF2,ZC3H12C,FOSL1,NFKBIB,SERTAD3,OVOL1,ZBTB49,ATF3,MAFF,CREB5,SERTAD1,EPHA2,PTGS2,UAP1,CTGF,PTBP2,GADD45A,JUN,YRDC,SLC25A25,ZC3H12A,ZBTB43,TSPYL2,ZNF165,XDH,ZMYM5,TDG,ZNF527,NABP1,ESRP1,KLF6,THUMPD2,PGM3,UBC,DDIT3,ZNF699,NR4A3
GO:0071901	negative regulation of protein serine/threonine kinase activity	6	130	0.85	0.003	9606.ENSP00000239223,9606.ENSP00000240100,9606.ENSP00000279488,9606.ENSP00000355866,9606.ENSP00000358596,9606.ENSP00000481570	DUSP1,DUSP4,DUSP6,DUSP10,DUSP5,TNFAIP3
GO:0009987	cellular process	113	14652	0.07	0.0032	9606.ENSP00000075120,9606.ENSP00000200453,9606.ENSP00000216037,9606.ENSP00000222803,9606.ENSP00000227752,9606.ENSP00000228437,9606.ENSP00000230990,9606.ENSP00000234420,9606.ENSP00000239223,9606.ENSP00000240100,9606.ENSP00000242480,9606.ENSP00000244869,9606.ENSP00000245919,9606.ENSP00000249356,9606.ENSP00000252809,9606.ENSP00000253063,9606.ENSP00000256458,9606.ENSP00000256495,9606.ENSP00000259874,…	SLC2A3,PPP1R15A,XBP1,FKBP14,IL10RA,PRDM4,HBEGF,MSH6,DUSP1,DUSP4,EGR2,EREG,FOSB,DNAJB9,GDF15,SESN2,IRAK2,BHLHE40,IER3,MAPK6,MAP3K8,IL1A,COQ10B,MXD1,SIK1,RHOB,CSRNP1,EAF2,PLK2,NRBF2,ZC3H12C,MPZL3,DUSP6,SEC24D,CXCL3,CXCL8,EIF2AK3,DDIT4,FOSL1,FUT1,NFKBIB,ZFAND2A,SERTAD3,TNFRSF12A,YOD1,RAB12,OVOL1,ZBTB49,ATF3,PEAR1,INSIG1,MAFF,RASSF1,CREB5,SERTAD1,EPHA2,OSGIN1,DUSP10,PTGS2,RGS16,SGK1,UAP1,CTGF,MCL1,DU…
GO:0000302	response to reactive oxygen species	7	189	0.75	0.0033	9606.ENSP00000239223,9606.ENSP00000272233,9606.ENSP00000310170,9606.ENSP00000360266,9606.ENSP00000368683,9606.ENSP00000481570,9606.ENSP00000482027	DUSP1,RHOB,FOSL1,JUN,EDN1,TNFAIP3,NR4A3
GO:0051347	positive regulation of transferase activity	13	630	0.5	0.0033	9606.ENSP00000244869,9606.ENSP00000252809,9606.ENSP00000256458,9606.ENSP00000263056,9606.ENSP00000265138,9606.ENSP00000279488,9606.ENSP00000358596,9606.ENSP00000360025,9606.ENSP00000368683,9606.ENSP00000398736,9606.ENSP00000417706,9606.ENSP00000441543,9606.ENSP00000482657	EREG,GDF15,IRAK2,MAP3K8,ARRDC3,DUSP6,DUSP5,GADD45A,EDN1,CYR61,DCUN1D2,UBC,MAP3K14
GO:0009636	response to toxic substance	11	468	0.55	0.0034	9606.ENSP00000239223,9606.ENSP00000253063,9606.ENSP00000272233,9606.ENSP00000310170,9606.ENSP00000356438,9606.ENSP00000360266,9606.ENSP00000362179,9606.ENSP00000368683,9606.ENSP00000381282,9606.ENSP00000481570,9606.ENSP00000482027	DUSP1,SESN2,RHOB,FOSL1,PTGS2,JUN,ZC3H12A,EDN1,VIMP,TNFAIP3,NR4A3
GO:0035994	response to muscle stretch	3	18	1.4	0.0035	9606.ENSP00000360266,9606.ENSP00000360762,9606.ENSP00000368683	JUN,ANKRD1,EDN1
GO:0000165	MAPK cascade	9	323	0.63	0.0036	9606.ENSP00000230990,9606.ENSP00000244869,9606.ENSP00000256458,9606.ENSP00000261845,9606.ENSP00000263056,9606.ENSP00000279488,9606.ENSP00000358596,9606.ENSP00000441543,9606.ENSP00000482657	HBEGF,EREG,IRAK2,MAPK6,MAP3K8,DUSP6,DUSP5,UBC,MAP3K14
GO:0048545	response to steroid hormone	9	324	0.62	0.0037	9606.ENSP00000239223,9606.ENSP00000245919,9606.ENSP00000307305,9606.ENSP00000310170,9606.ENSP00000356438,9606.ENSP00000356954,9606.ENSP00000366702,9606.ENSP00000368683,9606.ENSP00000482027	DUSP1,FOSB,DDIT4,FOSL1,PTGS2,CTGF,ERRFI1,EDN1,NR4A3
GO:0006470	protein dephosphorylation	7	194	0.74	0.0038	9606.ENSP00000200453,9606.ENSP00000239223,9606.ENSP00000240100,9606.ENSP00000279488,9606.ENSP00000355866,9606.ENSP00000358596,9606.ENSP00000379503	PPP1R15A,DUSP1,DUSP4,DUSP6,DUSP10,DUSP5,PDP1
GO:0009267	cellular response to starvation	6	137	0.82	0.0038	9606.ENSP00000216037,9606.ENSP00000253063,9606.ENSP00000307235,9606.ENSP00000344352,9606.ENSP00000360266,9606.ENSP00000362179	XBP1,SESN2,EIF2AK3,ATF3,JUN,ZC3H12A
GO:0009896	positive regulation of catabolic process	10	399	0.58	0.0038	9606.ENSP00000216037,9606.ENSP00000253063,9606.ENSP00000274289,9606.ENSP00000314619,9606.ENSP00000331748,9606.ENSP00000360690,9606.ENSP00000362179,9606.ENSP00000409555,9606.ENSP00000420612,9606.ENSP00000481570	XBP1,SESN2,PLK2,ZFAND2A,RAB12,LONRF3,ZC3H12A,HERPUD1,TIPARP,TNFAIP3
GO:0032720	negative regulation of tumor necrosis factor production	4	48	1.1	0.0038	9606.ENSP00000362179,9606.ENSP00000366702,9606.ENSP00000381282,9606.ENSP00000481570	ZC3H12A,ERRFI1,VIMP,TNFAIP3
GO:0061448	connective tissue development	7	194	0.74	0.0038	9606.ENSP00000216037,9606.ENSP00000265138,9606.ENSP00000307235,9606.ENSP00000356954,9606.ENSP00000362159,9606.ENSP00000368683,9606.ENSP00000398736	XBP1,ARRDC3,EIF2AK3,CTGF,SLC25A25,EDN1,CYR61
GO:0071363	cellular response to growth factor stimulus	11	477	0.54	0.0038	9606.ENSP00000216037,9606.ENSP00000252809,9606.ENSP00000306512,9606.ENSP00000307305,9606.ENSP00000356954,9606.ENSP00000360266,9606.ENSP00000360762,9606.ENSP00000366702,9606.ENSP00000368683,9606.ENSP00000405738,9606.ENSP00000441543	XBP1,GDF15,CXCL8,DDIT4,CTGF,JUN,ANKRD1,ERRFI1,EDN1,ESRP1,UBC
GO:1902236	negative regulation of endoplasmic reticulum stress-induced intrinsic apoptotic signaling pathway	3	19	1.38	0.0039	9606.ENSP00000216037,9606.ENSP00000381282,9606.ENSP00000409555	XBP1,VIMP,HERPUD1
GO:0062012	regulation of small molecule metabolic process	9	332	0.61	0.0042	9606.ENSP00000253063,9606.ENSP00000270162,9606.ENSP00000307305,9606.ENSP00000344741,9606.ENSP00000356438,9606.ENSP00000379503,9606.ENSP00000380247,9606.ENSP00000381282,9606.ENSP00000482027	SESN2,SIK1,DDIT4,INSIG1,PTGS2,PDP1,HRH1,VIMP,NR4A3
GO:0009991	response to extracellular stimulus	11	486	0.54	0.0043	9606.ENSP00000216037,9606.ENSP00000252809,9606.ENSP00000253063,9606.ENSP00000307235,9606.ENSP00000310170,9606.ENSP00000344352,9606.ENSP00000356438,9606.ENSP00000360266,9606.ENSP00000362159,9606.ENSP00000362179,9606.ENSP00000448665	XBP1,GDF15,SESN2,EIF2AK3,FOSL1,ATF3,PTGS2,JUN,SLC25A25,ZC3H12A,DDIT3
GO:0032436	positive regulation of proteasomal ubiquitin-dependent protein catabolic process	5	91	0.92	0.0043	9606.ENSP00000216037,9606.ENSP00000274289,9606.ENSP00000314619,9606.ENSP00000360690,9606.ENSP00000409555	XBP1,PLK2,ZFAND2A,LONRF3,HERPUD1
GO:0036491	regulation of translation initiation in response to endoplasmic reticulum stress	2	3	2	0.0043	9606.ENSP00000307235,9606.ENSP00000473631	EIF2AK3,DNAJC3
GO:0019221	cytokine-mediated signaling pathway	13	655	0.48	0.0044	9606.ENSP00000227752,9606.ENSP00000244869,9606.ENSP00000256458,9606.ENSP00000263056,9606.ENSP00000263339,9606.ENSP00000296026,9606.ENSP00000306512,9606.ENSP00000326737,9606.ENSP00000356438,9606.ENSP00000358022,9606.ENSP00000427279,9606.ENSP00000441543,9606.ENSP00000482657	IL10RA,EREG,IRAK2,MAP3K8,IL1A,CXCL3,CXCL8,TNFRSF12A,PTGS2,MCL1,CXCL2,UBC,MAP3K14
GO:0031329	regulation of cellular catabolic process	14	743	0.46	0.0044	9606.ENSP00000216037,9606.ENSP00000253063,9606.ENSP00000274289,9606.ENSP00000307305,9606.ENSP00000314619,9606.ENSP00000326813,9606.ENSP00000331748,9606.ENSP00000358022,9606.ENSP00000360690,9606.ENSP00000362179,9606.ENSP00000409555,9606.ENSP00000441214,9606.ENSP00000441543,9606.ENSP00000481570	XBP1,SESN2,PLK2,DDIT4,ZFAND2A,YOD1,RAB12,MCL1,LONRF3,ZC3H12A,HERPUD1,USP36,UBC,TNFAIP3
GO:0032691	negative regulation of interleukin-1 beta production	3	20	1.36	0.0044	9606.ENSP00000362179,9606.ENSP00000366702,9606.ENSP00000481570	ZC3H12A,ERRFI1,TNFAIP3
GO:0045934	negative regulation of nucleobase-containing compound metabolic process	21	1424	0.35	0.0044	9606.ENSP00000216037,9606.ENSP00000234420,9606.ENSP00000239223,9606.ENSP00000244869,9606.ENSP00000245919,9606.ENSP00000256495,9606.ENSP00000264444,9606.ENSP00000307305,9606.ENSP00000337862,9606.ENSP00000344352,9606.ENSP00000359216,9606.ENSP00000360266,9606.ENSP00000360762,9606.ENSP00000361458,9606.ENSP00000362179,9606.ENSP00000364591,9606.ENSP00000368683,9606.ENSP00000376611,9606.ENSP00000441543,…	XBP1,MSH6,DUSP1,EREG,FOSB,BHLHE40,MXD1,DDIT4,OVOL1,ATF3,PTBP2,JUN,ANKRD1,TSC22D3,ZC3H12A,TSPYL2,EDN1,TDG,UBC,DDIT3,NR4A3
GO:0051896	regulation of protein kinase B signaling	7	203	0.72	0.0046	9606.ENSP00000216037,9606.ENSP00000230990,9606.ENSP00000244869,9606.ENSP00000252809,9606.ENSP00000351209,9606.ENSP00000368727,9606.ENSP00000448665	XBP1,HBEGF,EREG,GDF15,EPHA2,XDH,DDIT3
GO:0070498	interleukin-1-mediated signaling pathway	4	51	1.08	0.0046	9606.ENSP00000256458,9606.ENSP00000263056,9606.ENSP00000263339,9606.ENSP00000441543	IRAK2,MAP3K8,IL1A,UBC
GO:0009894	regulation of catabolic process	15	840	0.43	0.0047	9606.ENSP00000216037,9606.ENSP00000253063,9606.ENSP00000274289,9606.ENSP00000307305,9606.ENSP00000314619,9606.ENSP00000326813,9606.ENSP00000331748,9606.ENSP00000358022,9606.ENSP00000360690,9606.ENSP00000362179,9606.ENSP00000409555,9606.ENSP00000420612,9606.ENSP00000441214,9606.ENSP00000441543,9606.ENSP00000481570	XBP1,SESN2,PLK2,DDIT4,ZFAND2A,YOD1,RAB12,MCL1,LONRF3,ZC3H12A,HERPUD1,TIPARP,USP36,UBC,TNFAIP3
GO:0006793	phosphorus metabolic process	27	2086	0.29	0.0048	9606.ENSP00000200453,9606.ENSP00000230990,9606.ENSP00000239223,9606.ENSP00000240100,9606.ENSP00000244869,9606.ENSP00000256458,9606.ENSP00000261845,9606.ENSP00000263056,9606.ENSP00000270162,9606.ENSP00000274289,9606.ENSP00000279488,9606.ENSP00000307235,9606.ENSP00000351209,9606.ENSP00000355866,9606.ENSP00000356438,9606.ENSP00000356832,9606.ENSP00000356903,9606.ENSP00000358596,9606.ENSP00000362159,…	PPP1R15A,HBEGF,DUSP1,DUSP4,EREG,IRAK2,MAPK6,MAP3K8,SIK1,PLK2,DUSP6,EIF2AK3,EPHA2,DUSP10,PTGS2,SGK1,UAP1,DUSP5,SLC25A25,GPCPD1,XDH,PIGA,TDG,PDP1,PGM3,UBC,MAP3K14
GO:0010469	regulation of signaling receptor activity	12	577	0.5	0.0048	9606.ENSP00000230990,9606.ENSP00000244869,9606.ENSP00000252809,9606.ENSP00000263339,9606.ENSP00000296026,9606.ENSP00000306512,9606.ENSP00000355374,9606.ENSP00000356954,9606.ENSP00000366702,9606.ENSP00000368683,9606.ENSP00000427279,9606.ENSP00000432799	HBEGF,EREG,GDF15,IL1A,CXCL3,CXCL8,OSGIN1,CTGF,ERRFI1,EDN1,CXCL2,MANF
GO:0035914	skeletal muscle cell differentiation	4	52	1.07	0.0048	9606.ENSP00000242480,9606.ENSP00000344352,9606.ENSP00000345393,9606.ENSP00000360762	EGR2,ATF3,MAFF,ANKRD1
GO:2000379	positive regulation of reactive oxygen species metabolic process	5	94	0.91	0.0048	9606.ENSP00000356438,9606.ENSP00000360025,9606.ENSP00000362179,9606.ENSP00000368683,9606.ENSP00000368727	PTGS2,GADD45A,ZC3H12A,EDN1,XDH
GO:0031669	cellular response to nutrient levels	7	206	0.71	0.0049	9606.ENSP00000216037,9606.ENSP00000253063,9606.ENSP00000307235,9606.ENSP00000344352,9606.ENSP00000356438,9606.ENSP00000360266,9606.ENSP00000362179	XBP1,SESN2,EIF2AK3,ATF3,PTGS2,JUN,ZC3H12A
GO:1903364	positive regulation of cellular protein catabolic process	6	147	0.79	0.0049	9606.ENSP00000216037,9606.ENSP00000274289,9606.ENSP00000314619,9606.ENSP00000360690,9606.ENSP00000409555,9606.ENSP00000481570	XBP1,PLK2,ZFAND2A,LONRF3,HERPUD1,TNFAIP3
GO:0031331	positive regulation of cellular catabolic process	9	343	0.6	0.005	9606.ENSP00000216037,9606.ENSP00000253063,9606.ENSP00000274289,9606.ENSP00000314619,9606.ENSP00000331748,9606.ENSP00000360690,9606.ENSP00000362179,9606.ENSP00000409555,9606.ENSP00000481570	XBP1,SESN2,PLK2,ZFAND2A,RAB12,LONRF3,ZC3H12A,HERPUD1,TNFAIP3
GO:0008285	negative regulation of cell population proliferation	13	669	0.47	0.0051	9606.ENSP00000239223,9606.ENSP00000244869,9606.ENSP00000263339,9606.ENSP00000273668,9606.ENSP00000306512,9606.ENSP00000310170,9606.ENSP00000337862,9606.ENSP00000338807,9606.ENSP00000355866,9606.ENSP00000356438,9606.ENSP00000360266,9606.ENSP00000368727,9606.ENSP00000481570	DUSP1,EREG,IL1A,EAF2,CXCL8,FOSL1,OVOL1,ZBTB49,DUSP10,PTGS2,JUN,XDH,TNFAIP3
GO:0010595	positive regulation of endothelial cell migration	5	96	0.9	0.0051	9606.ENSP00000272233,9606.ENSP00000274289,9606.ENSP00000356438,9606.ENSP00000362179,9606.ENSP00000368683	RHOB,PLK2,PTGS2,ZC3H12A,EDN1
GO:2001243	negative regulation of intrinsic apoptotic signaling pathway	5	96	0.9	0.0051	9606.ENSP00000216037,9606.ENSP00000356438,9606.ENSP00000358022,9606.ENSP00000381282,9606.ENSP00000409555	XBP1,PTGS2,MCL1,VIMP,HERPUD1
GO:0010594	regulation of endothelial cell migration	6	150	0.78	0.0054	9606.ENSP00000272233,9606.ENSP00000274289,9606.ENSP00000351209,9606.ENSP00000356438,9606.ENSP00000362179,9606.ENSP00000368683	RHOB,PLK2,EPHA2,PTGS2,ZC3H12A,EDN1
GO:0009314	response to radiation	10	425	0.55	0.0055	9606.ENSP00000234420,9606.ENSP00000239223,9606.ENSP00000256495,9606.ENSP00000270162,9606.ENSP00000272233,9606.ENSP00000356438,9606.ENSP00000360025,9606.ENSP00000360266,9606.ENSP00000380247,9606.ENSP00000403683	MSH6,DUSP1,BHLHE40,SIK1,RHOB,PTGS2,GADD45A,JUN,HRH1,NABP1
GO:1901360	organic cyclic compound metabolic process	50	4963	0.18	0.0055	9606.ENSP00000216037,9606.ENSP00000228437,9606.ENSP00000234420,9606.ENSP00000242480,9606.ENSP00000244869,9606.ENSP00000245919,9606.ENSP00000253063,9606.ENSP00000256495,9606.ENSP00000264444,9606.ENSP00000273153,9606.ENSP00000273668,9606.ENSP00000277746,9606.ENSP00000278590,9606.ENSP00000310170,9606.ENSP00000312988,9606.ENSP00000325414,9606.ENSP00000337862,9606.ENSP00000338807,9606.ENSP00000344352,…	XBP1,PRDM4,MSH6,EGR2,EREG,FOSB,SESN2,BHLHE40,MXD1,CSRNP1,EAF2,NRBF2,ZC3H12C,FOSL1,NFKBIB,SERTAD3,OVOL1,ZBTB49,ATF3,INSIG1,MAFF,CREB5,SERTAD1,EPHA2,PTGS2,UAP1,CTGF,PTBP2,GADD45A,JUN,YRDC,SLC25A25,ZC3H12A,ZBTB43,TSPYL2,ZNF165,XDH,ZMYM5,TDG,ZNF527,NABP1,ESRP1,KLF6,TIPARP,THUMPD2,PGM3,UBC,DDIT3,ZNF699,NR4A3
GO:0032058	positive regulation of translational initiation in response to stress	2	4	1.88	0.0058	9606.ENSP00000200453,9606.ENSP00000473631	PPP1R15A,DNAJC3
GO:0051771	negative regulation of nitric-oxide synthase biosynthetic process	2	4	1.88	0.0058	9606.ENSP00000368683,9606.ENSP00000381282	EDN1,VIMP
GO:0035335	peptidyl-tyrosine dephosphorylation	5	100	0.88	0.0059	9606.ENSP00000239223,9606.ENSP00000240100,9606.ENSP00000279488,9606.ENSP00000355866,9606.ENSP00000358596	DUSP1,DUSP4,DUSP6,DUSP10,DUSP5
GO:1900745	positive regulation of p38MAPK cascade	3	23	1.3	0.0059	9606.ENSP00000360025,9606.ENSP00000362179,9606.ENSP00000368727	GADD45A,ZC3H12A,XDH
GO:0090304	nucleic acid metabolic process	42	3941	0.21	0.006	9606.ENSP00000216037,9606.ENSP00000228437,9606.ENSP00000234420,9606.ENSP00000242480,9606.ENSP00000244869,9606.ENSP00000245919,9606.ENSP00000253063,9606.ENSP00000256495,9606.ENSP00000264444,9606.ENSP00000273153,9606.ENSP00000273668,9606.ENSP00000277746,9606.ENSP00000278590,9606.ENSP00000310170,9606.ENSP00000312988,9606.ENSP00000325414,9606.ENSP00000337862,9606.ENSP00000338807,9606.ENSP00000344352,…	XBP1,PRDM4,MSH6,EGR2,EREG,FOSB,SESN2,BHLHE40,MXD1,CSRNP1,EAF2,NRBF2,ZC3H12C,FOSL1,NFKBIB,SERTAD3,OVOL1,ZBTB49,ATF3,MAFF,CREB5,SERTAD1,CTGF,PTBP2,GADD45A,JUN,YRDC,ZC3H12A,ZBTB43,TSPYL2,ZNF165,ZMYM5,TDG,ZNF527,NABP1,ESRP1,KLF6,THUMPD2,UBC,DDIT3,ZNF699,NR4A3
GO:0007049	cell cycle	19	1263	0.36	0.0062	9606.ENSP00000200453,9606.ENSP00000234420,9606.ENSP00000239223,9606.ENSP00000244869,9606.ENSP00000261845,9606.ENSP00000263056,9606.ENSP00000270162,9606.ENSP00000272233,9606.ENSP00000274289,9606.ENSP00000306512,9606.ENSP00000337862,9606.ENSP00000338807,9606.ENSP00000349547,9606.ENSP00000360025,9606.ENSP00000360672,9606.ENSP00000364591,9606.ENSP00000403683,9606.ENSP00000448665,9606.ENSP00000484532	PPP1R15A,MSH6,DUSP1,EREG,MAPK6,MAP3K8,SIK1,RHOB,PLK2,CXCL8,OVOL1,ZBTB49,RASSF1,GADD45A,PARD6B,TSPYL2,NABP1,DDIT3,MIS12
GO:0034612	response to tumor necrosis factor	7	217	0.69	0.0063	9606.ENSP00000306512,9606.ENSP00000326737,9606.ENSP00000356438,9606.ENSP00000360762,9606.ENSP00000362179,9606.ENSP00000368683,9606.ENSP00000482657	CXCL8,TNFRSF12A,PTGS2,ANKRD1,ZC3H12A,EDN1,MAP3K14
GO:0045732	positive regulation of protein catabolic process	7	217	0.69	0.0063	9606.ENSP00000216037,9606.ENSP00000274289,9606.ENSP00000314619,9606.ENSP00000360690,9606.ENSP00000409555,9606.ENSP00000420612,9606.ENSP00000481570	XBP1,PLK2,ZFAND2A,LONRF3,HERPUD1,TIPARP,TNFAIP3
GO:0045860	positive regulation of protein kinase activity	11	517	0.51	0.0064	9606.ENSP00000244869,9606.ENSP00000252809,9606.ENSP00000256458,9606.ENSP00000263056,9606.ENSP00000279488,9606.ENSP00000358596,9606.ENSP00000360025,9606.ENSP00000368683,9606.ENSP00000398736,9606.ENSP00000441543,9606.ENSP00000482657	EREG,GDF15,IRAK2,MAP3K8,DUSP6,DUSP5,GADD45A,EDN1,CYR61,UBC,MAP3K14
GO:2001234	negative regulation of apoptotic signaling pathway	7	218	0.69	0.0064	9606.ENSP00000216037,9606.ENSP00000263339,9606.ENSP00000356438,9606.ENSP00000358022,9606.ENSP00000381282,9606.ENSP00000409555,9606.ENSP00000481570	XBP1,IL1A,PTGS2,MCL1,VIMP,HERPUD1,TNFAIP3
GO:0010508	positive regulation of autophagy	5	103	0.87	0.0065	9606.ENSP00000216037,9606.ENSP00000253063,9606.ENSP00000274289,9606.ENSP00000331748,9606.ENSP00000362179	XBP1,SESN2,PLK2,RAB12,ZC3H12A
GO:0043433	negative regulation of DNA-binding transcription factor activity	6	157	0.76	0.0065	9606.ENSP00000256458,9606.ENSP00000256495,9606.ENSP00000270162,9606.ENSP00000362179,9606.ENSP00000448665,9606.ENSP00000481570	IRAK2,BHLHE40,SIK1,ZC3H12A,DDIT3,TNFAIP3
GO:0072593	reactive oxygen species metabolic process	5	103	0.87	0.0065	9606.ENSP00000253063,9606.ENSP00000307305,9606.ENSP00000356954,9606.ENSP00000368683,9606.ENSP00000398736	SESN2,DDIT4,CTGF,EDN1,CYR61
GO:0034599	cellular response to oxidative stress	7	222	0.68	0.007	9606.ENSP00000216037,9606.ENSP00000253063,9606.ENSP00000272233,9606.ENSP00000360266,9606.ENSP00000362179,9606.ENSP00000381282,9606.ENSP00000481570	XBP1,SESN2,RHOB,JUN,ZC3H12A,VIMP,TNFAIP3
GO:0030308	negative regulation of cell growth	6	164	0.74	0.0079	9606.ENSP00000253063,9606.ENSP00000273668,9606.ENSP00000325414,9606.ENSP00000355374,9606.ENSP00000364591,9606.ENSP00000427108	SESN2,EAF2,SERTAD3,OSGIN1,TSPYL2,CDKN2AIP
GO:0019216	regulation of lipid metabolic process	9	373	0.56	0.0082	9606.ENSP00000216037,9606.ENSP00000270162,9606.ENSP00000277746,9606.ENSP00000344741,9606.ENSP00000356438,9606.ENSP00000360762,9606.ENSP00000379503,9606.ENSP00000398736,9606.ENSP00000482027	XBP1,SIK1,NRBF2,INSIG1,PTGS2,ANKRD1,PDP1,CYR61,NR4A3
GO:0006796	phosphate-containing compound metabolic process	26	2065	0.28	0.0084	9606.ENSP00000200453,9606.ENSP00000230990,9606.ENSP00000239223,9606.ENSP00000240100,9606.ENSP00000244869,9606.ENSP00000256458,9606.ENSP00000261845,9606.ENSP00000263056,9606.ENSP00000270162,9606.ENSP00000274289,9606.ENSP00000279488,9606.ENSP00000307235,9606.ENSP00000351209,9606.ENSP00000355866,9606.ENSP00000356438,9606.ENSP00000356832,9606.ENSP00000358596,9606.ENSP00000362159,9606.ENSP00000368305,…	PPP1R15A,HBEGF,DUSP1,DUSP4,EREG,IRAK2,MAPK6,MAP3K8,SIK1,PLK2,DUSP6,EIF2AK3,EPHA2,DUSP10,PTGS2,SGK1,DUSP5,SLC25A25,GPCPD1,XDH,PIGA,TDG,PDP1,PGM3,UBC,MAP3K14
GO:0042493	response to drug	15	900	0.4	0.0084	9606.ENSP00000239223,9606.ENSP00000245919,9606.ENSP00000272233,9606.ENSP00000279488,9606.ENSP00000307305,9606.ENSP00000310170,9606.ENSP00000356438,9606.ENSP00000360266,9606.ENSP00000360762,9606.ENSP00000362159,9606.ENSP00000362179,9606.ENSP00000366702,9606.ENSP00000368683,9606.ENSP00000481570,9606.ENSP00000482027	DUSP1,FOSB,RHOB,DUSP6,DDIT4,FOSL1,PTGS2,JUN,ANKRD1,SLC25A25,ZC3H12A,ERRFI1,EDN1,TNFAIP3,NR4A3
GO:0010575	positive regulation of vascular endothelial growth factor production	3	27	1.23	0.0085	9606.ENSP00000263339,9606.ENSP00000307235,9606.ENSP00000356438	IL1A,EIF2AK3,PTGS2
GO:0031667	response to nutrient levels	10	455	0.52	0.0085	9606.ENSP00000216037,9606.ENSP00000252809,9606.ENSP00000253063,9606.ENSP00000307235,9606.ENSP00000344352,9606.ENSP00000356438,9606.ENSP00000360266,9606.ENSP00000362159,9606.ENSP00000362179,9606.ENSP00000448665	XBP1,GDF15,SESN2,EIF2AK3,ATF3,PTGS2,JUN,SLC25A25,ZC3H12A,DDIT3
GO:0070423	nucleotide-binding oligomerization domain containing signaling pathway	3	27	1.23	0.0085	9606.ENSP00000256458,9606.ENSP00000441543,9606.ENSP00000481570	IRAK2,UBC,TNFAIP3
GO:0000122	negative regulation of transcription by RNA polymerase II	14	809	0.42	0.0087	9606.ENSP00000216037,9606.ENSP00000245919,9606.ENSP00000256495,9606.ENSP00000264444,9606.ENSP00000337862,9606.ENSP00000344352,9606.ENSP00000360266,9606.ENSP00000360762,9606.ENSP00000361458,9606.ENSP00000368683,9606.ENSP00000376611,9606.ENSP00000441543,9606.ENSP00000448665,9606.ENSP00000482027	XBP1,FOSB,BHLHE40,MXD1,OVOL1,ATF3,JUN,ANKRD1,TSC22D3,EDN1,TDG,UBC,DDIT3,NR4A3
GO:0043086	negative regulation of catalytic activity	14	809	0.42	0.0087	9606.ENSP00000200453,9606.ENSP00000239223,9606.ENSP00000240100,9606.ENSP00000279488,9606.ENSP00000355866,9606.ENSP00000356438,9606.ENSP00000358596,9606.ENSP00000360025,9606.ENSP00000366702,9606.ENSP00000379201,9606.ENSP00000409555,9606.ENSP00000446479,9606.ENSP00000473631,9606.ENSP00000481570	PPP1R15A,DUSP1,DUSP4,DUSP6,DUSP10,PTGS2,DUSP5,GADD45A,ERRFI1,VCPKMT,HERPUD1,FICD,DNAJC3,TNFAIP3
GO:0051128	regulation of cellular component organization	28	2306	0.27	0.0089	9606.ENSP00000200453,9606.ENSP00000216037,9606.ENSP00000227752,9606.ENSP00000230990,9606.ENSP00000239223,9606.ENSP00000244869,9606.ENSP00000252809,9606.ENSP00000253063,9606.ENSP00000261845,9606.ENSP00000263339,9606.ENSP00000273668,9606.ENSP00000274289,9606.ENSP00000310170,9606.ENSP00000325414,9606.ENSP00000326737,9606.ENSP00000344741,9606.ENSP00000349547,9606.ENSP00000351209,9606.ENSP00000355374,…	PPP1R15A,XBP1,IL10RA,HBEGF,DUSP1,EREG,GDF15,SESN2,MAPK6,IL1A,EAF2,PLK2,FOSL1,SERTAD3,TNFRSF12A,INSIG1,RASSF1,EPHA2,OSGIN1,SGK1,CTGF,JUN,ANKRD1,TSPYL2,EDN1,ZMYM5,CYR61,CDKN2AIP
GO:2000377	regulation of reactive oxygen species metabolic process	6	169	0.73	0.0089	9606.ENSP00000356438,9606.ENSP00000360025,9606.ENSP00000362179,9606.ENSP00000368683,9606.ENSP00000368727,9606.ENSP00000381282	PTGS2,GADD45A,ZC3H12A,EDN1,XDH,VIMP
GO:0046677	response to antibiotic	8	305	0.6	0.0091	9606.ENSP00000239223,9606.ENSP00000272233,9606.ENSP00000310170,9606.ENSP00000360266,9606.ENSP00000362179,9606.ENSP00000368683,9606.ENSP00000481570,9606.ENSP00000482027	DUSP1,RHOB,FOSL1,JUN,ZC3H12A,EDN1,TNFAIP3,NR4A3
GO:1904292	regulation of ERAD pathway	3	28	1.21	0.0091	9606.ENSP00000216037,9606.ENSP00000326813,9606.ENSP00000409555	XBP1,YOD1,HERPUD1
GO:0007611	learning or memory	7	237	0.65	0.0096	9606.ENSP00000242480,9606.ENSP00000274289,9606.ENSP00000310170,9606.ENSP00000356438,9606.ENSP00000356832,9606.ENSP00000360266,9606.ENSP00000380247	EGR2,PLK2,FOSL1,PTGS2,SGK1,JUN,HRH1
GO:0032792	negative regulation of CREB transcription factor activity	2	6	1.7	0.0097	9606.ENSP00000270162,9606.ENSP00000448665	SIK1,DDIT3
GO:0061043	regulation of vascular wound healing	2	6	1.7	0.0097	9606.ENSP00000216037,9606.ENSP00000481570	XBP1,TNFAIP3
GO:0035690	cellular response to drug	8	310	0.59	0.0099	9606.ENSP00000272233,9606.ENSP00000307305,9606.ENSP00000356438,9606.ENSP00000360762,9606.ENSP00000362179,9606.ENSP00000366702,9606.ENSP00000368683,9606.ENSP00000481570	RHOB,DDIT4,PTGS2,ANKRD1,ZC3H12A,ERRFI1,EDN1,TNFAIP3
GO:0048513	animal organ development	33	2926	0.23	0.0099	9606.ENSP00000216037,9606.ENSP00000230990,9606.ENSP00000242480,9606.ENSP00000244869,9606.ENSP00000249356,9606.ENSP00000265138,9606.ENSP00000270162,9606.ENSP00000273153,9606.ENSP00000306512,9606.ENSP00000307235,9606.ENSP00000307305,9606.ENSP00000310170,9606.ENSP00000337862,9606.ENSP00000344352,9606.ENSP00000344741,9606.ENSP00000345393,9606.ENSP00000351209,9606.ENSP00000356438,9606.ENSP00000356954,…	XBP1,HBEGF,EGR2,EREG,DNAJB9,ARRDC3,SIK1,CSRNP1,CXCL8,EIF2AK3,DDIT4,FOSL1,OVOL1,ATF3,INSIG1,MAFF,EPHA2,PTGS2,CTGF,TUFT1,PTBP2,JUN,ANKRD1,SLC25A25,ERRFI1,GPCPD1,EDN1,XDH,CYR61,KLF6,TIPARP,PGM3,NR4A3
GO:0016070	RNA metabolic process	37	3430	0.21	0.0104	9606.ENSP00000216037,9606.ENSP00000228437,9606.ENSP00000242480,9606.ENSP00000244869,9606.ENSP00000245919,9606.ENSP00000256495,9606.ENSP00000264444,9606.ENSP00000273153,9606.ENSP00000273668,9606.ENSP00000277746,9606.ENSP00000310170,9606.ENSP00000312988,9606.ENSP00000325414,9606.ENSP00000337862,9606.ENSP00000338807,9606.ENSP00000344352,9606.ENSP00000345393,9606.ENSP00000350359,9606.ENSP00000350633,…	XBP1,PRDM4,EGR2,EREG,FOSB,BHLHE40,MXD1,CSRNP1,EAF2,NRBF2,FOSL1,NFKBIB,SERTAD3,OVOL1,ZBTB49,ATF3,MAFF,CREB5,SERTAD1,CTGF,PTBP2,JUN,YRDC,ZC3H12A,ZBTB43,TSPYL2,ZNF165,ZMYM5,TDG,ZNF527,NABP1,ESRP1,KLF6,THUMPD2,DDIT3,ZNF699,NR4A3
GO:0006970	response to osmotic stress	4	68	0.95	0.0105	9606.ENSP00000354543,9606.ENSP00000356438,9606.ENSP00000361458,9606.ENSP00000366702	TSC22D2,PTGS2,TSC22D3,ERRFI1
GO:0044257	cellular protein catabolic process	11	562	0.47	0.0113	9606.ENSP00000216037,9606.ENSP00000249356,9606.ENSP00000326813,9606.ENSP00000331748,9606.ENSP00000381282,9606.ENSP00000409555,9606.ENSP00000441214,9606.ENSP00000441543,9606.ENSP00000448665,9606.ENSP00000473631,9606.ENSP00000481570	XBP1,DNAJB9,YOD1,RAB12,VIMP,HERPUD1,USP36,UBC,DDIT3,DNAJC3,TNFAIP3
GO:0070059	intrinsic apoptotic signaling pathway in response to endoplasmic reticulum stress	3	31	1.17	0.0115	9606.ENSP00000200453,9606.ENSP00000216037,9606.ENSP00000448665	PPP1R15A,XBP1,DDIT3
GO:1903524	positive regulation of blood circulation	4	70	0.94	0.0115	9606.ENSP00000356438,9606.ENSP00000356954,9606.ENSP00000368683,9606.ENSP00000380247	PTGS2,CTGF,EDN1,HRH1
GO:0010629	negative regulation of gene expression	22	1670	0.3	0.0116	9606.ENSP00000216037,9606.ENSP00000244869,9606.ENSP00000245919,9606.ENSP00000253063,9606.ENSP00000256495,9606.ENSP00000264444,9606.ENSP00000307235,9606.ENSP00000337862,9606.ENSP00000344352,9606.ENSP00000356954,9606.ENSP00000359216,9606.ENSP00000360266,9606.ENSP00000360762,9606.ENSP00000361458,9606.ENSP00000362179,9606.ENSP00000368683,9606.ENSP00000368727,9606.ENSP00000376611,9606.ENSP00000420612,…	XBP1,EREG,FOSB,SESN2,BHLHE40,MXD1,EIF2AK3,OVOL1,ATF3,CTGF,PTBP2,JUN,ANKRD1,TSC22D3,ZC3H12A,EDN1,XDH,TDG,TIPARP,UBC,DDIT3,NR4A3
GO:1903362	regulation of cellular protein catabolic process	7	248	0.63	0.0119	9606.ENSP00000216037,9606.ENSP00000274289,9606.ENSP00000314619,9606.ENSP00000326813,9606.ENSP00000360690,9606.ENSP00000409555,9606.ENSP00000481570	XBP1,PLK2,ZFAND2A,YOD1,LONRF3,HERPUD1,TNFAIP3
GO:0006954	inflammatory response	10	482	0.5	0.012	9606.ENSP00000256458,9606.ENSP00000263339,9606.ENSP00000296026,9606.ENSP00000306512,9606.ENSP00000356438,9606.ENSP00000360266,9606.ENSP00000362179,9606.ENSP00000380247,9606.ENSP00000427279,9606.ENSP00000481570	IRAK2,IL1A,CXCL3,CXCL8,PTGS2,JUN,ZC3H12A,HRH1,CXCL2,TNFAIP3
GO:0007519	skeletal muscle tissue development	5	122	0.79	0.012	9606.ENSP00000242480,9606.ENSP00000344352,9606.ENSP00000345393,9606.ENSP00000360762,9606.ENSP00000368305	EGR2,ATF3,MAFF,ANKRD1,GPCPD1
GO:0008630	intrinsic apoptotic signaling pathway in response to DNA damage	4	71	0.93	0.012	9606.ENSP00000234420,9606.ENSP00000307305,9606.ENSP00000351209,9606.ENSP00000358022	MSH6,DDIT4,EPHA2,MCL1
GO:0032055	negative regulation of translation in response to stress	2	7	1.64	0.012	9606.ENSP00000253063,9606.ENSP00000307235	SESN2,EIF2AK3
GO:2000347	positive regulation of hepatocyte proliferation	2	7	1.64	0.012	9606.ENSP00000216037,9606.ENSP00000481570	XBP1,TNFAIP3
GO:0060326	cell chemotaxis	6	183	0.7	0.0122	9606.ENSP00000230990,9606.ENSP00000296026,9606.ENSP00000306512,9606.ENSP00000351209,9606.ENSP00000380247,9606.ENSP00000427279	HBEGF,CXCL3,CXCL8,EPHA2,HRH1,CXCL2
GO:0060612	adipose tissue development	3	32	1.15	0.0122	9606.ENSP00000216037,9606.ENSP00000265138,9606.ENSP00000362159	XBP1,ARRDC3,SLC25A25
GO:1901654	response to ketone	6	183	0.7	0.0122	9606.ENSP00000239223,9606.ENSP00000245919,9606.ENSP00000307305,9606.ENSP00000310170,9606.ENSP00000366702,9606.ENSP00000368683	DUSP1,FOSB,DDIT4,FOSL1,ERRFI1,EDN1
GO:0061136	regulation of proteasomal protein catabolic process	6	185	0.69	0.0128	9606.ENSP00000216037,9606.ENSP00000274289,9606.ENSP00000314619,9606.ENSP00000326813,9606.ENSP00000360690,9606.ENSP00000409555	XBP1,PLK2,ZFAND2A,YOD1,LONRF3,HERPUD1
GO:0014065	phosphatidylinositol 3-kinase signaling	3	33	1.14	0.0131	9606.ENSP00000216037,9606.ENSP00000344465,9606.ENSP00000368683	XBP1,PEAR1,EDN1
GO:0006935	chemotaxis	10	491	0.49	0.0134	9606.ENSP00000230990,9606.ENSP00000242480,9606.ENSP00000296026,9606.ENSP00000306512,9606.ENSP00000310170,9606.ENSP00000351209,9606.ENSP00000380247,9606.ENSP00000398736,9606.ENSP00000427279,9606.ENSP00000482027	HBEGF,EGR2,CXCL3,CXCL8,FOSL1,EPHA2,HRH1,CYR61,CXCL2,NR4A3
GO:0045595	regulation of cell differentiation	22	1695	0.29	0.0134	9606.ENSP00000216037,9606.ENSP00000244869,9606.ENSP00000252809,9606.ENSP00000261845,9606.ENSP00000270162,9606.ENSP00000274289,9606.ENSP00000279488,9606.ENSP00000326737,9606.ENSP00000344741,9606.ENSP00000345393,9606.ENSP00000355866,9606.ENSP00000356438,9606.ENSP00000356954,9606.ENSP00000360266,9606.ENSP00000360762,9606.ENSP00000362179,9606.ENSP00000366702,9606.ENSP00000368683,9606.ENSP00000368727,…	XBP1,EREG,GDF15,MAPK6,SIK1,PLK2,DUSP6,TNFRSF12A,INSIG1,MAFF,DUSP10,PTGS2,CTGF,JUN,ANKRD1,ZC3H12A,ERRFI1,EDN1,XDH,CYR61,DDIT3,NR4A3
GO:0048008	platelet-derived growth factor receptor signaling pathway	3	34	1.13	0.0139	9606.ENSP00000273153,9606.ENSP00000420612,9606.ENSP00000482027	CSRNP1,TIPARP,NR4A3
GO:0022603	regulation of anatomical structure morphogenesis	15	961	0.37	0.014	9606.ENSP00000216037,9606.ENSP00000252809,9606.ENSP00000263339,9606.ENSP00000272233,9606.ENSP00000274289,9606.ENSP00000279488,9606.ENSP00000306512,9606.ENSP00000326737,9606.ENSP00000351209,9606.ENSP00000356438,9606.ENSP00000362179,9606.ENSP00000368683,9606.ENSP00000368727,9606.ENSP00000372361,9606.ENSP00000481570	XBP1,GDF15,IL1A,RHOB,PLK2,DUSP6,CXCL8,TNFRSF12A,EPHA2,PTGS2,ZC3H12A,EDN1,XDH,ZMYM5,TNFAIP3
GO:0009750	response to fructose	2	8	1.58	0.0142	9606.ENSP00000216037,9606.ENSP00000356438	XBP1,PTGS2
GO:0051409	response to nitrosative stress	2	8	1.58	0.0142	9606.ENSP00000279488,9606.ENSP00000448665	DUSP6,DDIT3
GO:0070417	cellular response to cold	2	8	1.58	0.0142	9606.ENSP00000307235,9606.ENSP00000473631	EIF2AK3,DNAJC3
GO:1903071	positive regulation of ER-associated ubiquitin-dependent protein catabolic process	2	8	1.58	0.0142	9606.ENSP00000216037,9606.ENSP00000409555	XBP1,HERPUD1
GO:0032879	regulation of localization	29	2524	0.24	0.0147	9606.ENSP00000216037,9606.ENSP00000230990,9606.ENSP00000244869,9606.ENSP00000253063,9606.ENSP00000263339,9606.ENSP00000264711,9606.ENSP00000270162,9606.ENSP00000272233,9606.ENSP00000274289,9606.ENSP00000296026,9606.ENSP00000306512,9606.ENSP00000307235,9606.ENSP00000326813,9606.ENSP00000344741,9606.ENSP00000351209,9606.ENSP00000355866,9606.ENSP00000356438,9606.ENSP00000356832,9606.ENSP00000360266,…	XBP1,HBEGF,EREG,SESN2,IL1A,DNAJC27,SIK1,RHOB,PLK2,CXCL3,CXCL8,EIF2AK3,YOD1,INSIG1,EPHA2,DUSP10,PTGS2,SGK1,JUN,PARD6B,ANKRD1,YRDC,ZC3H12A,EDN1,VIMP,CYR61,CXCL2,DDIT3,NR4A3
GO:0043491	protein kinase B signaling	3	35	1.11	0.0148	9606.ENSP00000253063,9606.ENSP00000344465,9606.ENSP00000351209	SESN2,PEAR1,EPHA2
GO:0034645	cellular macromolecule biosynthetic process	37	3518	0.2	0.015	9606.ENSP00000216037,9606.ENSP00000228437,9606.ENSP00000242480,9606.ENSP00000244869,9606.ENSP00000245919,9606.ENSP00000256495,9606.ENSP00000264444,9606.ENSP00000273153,9606.ENSP00000273668,9606.ENSP00000277746,9606.ENSP00000310170,9606.ENSP00000312021,9606.ENSP00000312988,9606.ENSP00000325414,9606.ENSP00000337862,9606.ENSP00000338807,9606.ENSP00000344352,9606.ENSP00000345393,9606.ENSP00000350359,…	XBP1,PRDM4,EGR2,EREG,FOSB,BHLHE40,MXD1,CSRNP1,EAF2,NRBF2,FOSL1,FUT1,NFKBIB,SERTAD3,OVOL1,ZBTB49,ATF3,MAFF,CREB5,SERTAD1,CTGF,JUN,ZC3H12A,ZBTB43,TSPYL2,ZNF165,PIGA,ZMYM5,TDG,ZNF527,NABP1,KLF6,PGM3,UBC,DDIT3,ZNF699,NR4A3
GO:0071260	cellular response to mechanical stimulus	4	78	0.89	0.0155	9606.ENSP00000356438,9606.ENSP00000360025,9606.ENSP00000360762,9606.ENSP00000482657	PTGS2,GADD45A,ANKRD1,MAP3K14
GO:0006111	regulation of gluconeogenesis	3	36	1.1	0.0157	9606.ENSP00000253063,9606.ENSP00000270162,9606.ENSP00000381282	SESN2,SIK1,VIMP
GO:0051094	positive regulation of developmental process	18	1286	0.33	0.0157	9606.ENSP00000216037,9606.ENSP00000234420,9606.ENSP00000252809,9606.ENSP00000261845,9606.ENSP00000263339,9606.ENSP00000272233,9606.ENSP00000274289,9606.ENSP00000306512,9606.ENSP00000326737,9606.ENSP00000355866,9606.ENSP00000356438,9606.ENSP00000356954,9606.ENSP00000360266,9606.ENSP00000360762,9606.ENSP00000362179,9606.ENSP00000368683,9606.ENSP00000398736,9606.ENSP00000481570	XBP1,MSH6,GDF15,MAPK6,IL1A,RHOB,PLK2,CXCL8,TNFRSF12A,DUSP10,PTGS2,CTGF,JUN,ANKRD1,ZC3H12A,EDN1,CYR61,TNFAIP3
GO:0071407	cellular response to organic cyclic compound	10	505	0.48	0.0157	9606.ENSP00000307305,9606.ENSP00000344741,9606.ENSP00000356438,9606.ENSP00000360762,9606.ENSP00000362179,9606.ENSP00000366702,9606.ENSP00000368683,9606.ENSP00000380247,9606.ENSP00000420612,9606.ENSP00000482027	DDIT4,INSIG1,PTGS2,ANKRD1,ZC3H12A,ERRFI1,EDN1,HRH1,TIPARP,NR4A3
GO:0097237	cellular response to toxic substance	6	195	0.67	0.0157	9606.ENSP00000253063,9606.ENSP00000272233,9606.ENSP00000356438,9606.ENSP00000362179,9606.ENSP00000381282,9606.ENSP00000481570	SESN2,RHOB,PTGS2,ZC3H12A,VIMP,TNFAIP3
GO:0010675	regulation of cellular carbohydrate metabolic process	5	133	0.76	0.0159	9606.ENSP00000253063,9606.ENSP00000270162,9606.ENSP00000307305,9606.ENSP00000380247,9606.ENSP00000381282	SESN2,SIK1,DDIT4,HRH1,VIMP
GO:0071356	cellular response to tumor necrosis factor	6	197	0.66	0.0163	9606.ENSP00000306512,9606.ENSP00000326737,9606.ENSP00000360762,9606.ENSP00000362179,9606.ENSP00000368683,9606.ENSP00000482657	CXCL8,TNFRSF12A,ANKRD1,ZC3H12A,EDN1,MAP3K14
GO:0006048	UDP-N-acetylglucosamine biosynthetic process	2	9	1.53	0.0166	9606.ENSP00000356903,9606.ENSP00000425809	UAP1,PGM3
GO:0036500	ATF6-mediated unfolded protein response	2	9	1.53	0.0166	9606.ENSP00000216037,9606.ENSP00000448665	XBP1,DDIT3
GO:0032147	activation of protein kinase activity	8	347	0.54	0.0172	9606.ENSP00000252809,9606.ENSP00000256458,9606.ENSP00000263056,9606.ENSP00000279488,9606.ENSP00000358596,9606.ENSP00000360025,9606.ENSP00000441543,9606.ENSP00000482657	GDF15,IRAK2,MAP3K8,DUSP6,DUSP5,GADD45A,UBC,MAP3K14
GO:1990869	cellular response to chemokine	4	81	0.87	0.0172	9606.ENSP00000296026,9606.ENSP00000306512,9606.ENSP00000362179,9606.ENSP00000427279	CXCL3,CXCL8,ZC3H12A,CXCL2
GO:0022402	cell cycle process	14	890	0.38	0.0176	9606.ENSP00000200453,9606.ENSP00000234420,9606.ENSP00000239223,9606.ENSP00000244869,9606.ENSP00000272233,9606.ENSP00000274289,9606.ENSP00000306512,9606.ENSP00000337862,9606.ENSP00000338807,9606.ENSP00000349547,9606.ENSP00000360025,9606.ENSP00000403683,9606.ENSP00000448665,9606.ENSP00000484532	PPP1R15A,MSH6,DUSP1,EREG,RHOB,PLK2,CXCL8,OVOL1,ZBTB49,RASSF1,GADD45A,NABP1,DDIT3,MIS12
GO:0032715	negative regulation of interleukin-6 production	3	38	1.08	0.0176	9606.ENSP00000362179,9606.ENSP00000381282,9606.ENSP00000481570	ZC3H12A,VIMP,TNFAIP3
GO:0033157	regulation of intracellular protein transport	6	201	0.66	0.0176	9606.ENSP00000216037,9606.ENSP00000264711,9606.ENSP00000326813,9606.ENSP00000344741,9606.ENSP00000356438,9606.ENSP00000362179	XBP1,DNAJC27,YOD1,INSIG1,PTGS2,ZC3H12A
GO:0044057	regulation of system process	10	516	0.47	0.0176	9606.ENSP00000230990,9606.ENSP00000307235,9606.ENSP00000356438,9606.ENSP00000356832,9606.ENSP00000356954,9606.ENSP00000362179,9606.ENSP00000366702,9606.ENSP00000368683,9606.ENSP00000380247,9606.ENSP00000482027	HBEGF,EIF2AK3,PTGS2,SGK1,CTGF,ZC3H12A,ERRFI1,EDN1,HRH1,NR4A3
GO:0071548	response to dexamethasone	3	38	1.08	0.0176	9606.ENSP00000307305,9606.ENSP00000366702,9606.ENSP00000368683	DDIT4,ERRFI1,EDN1
GO:0070542	response to fatty acid	4	82	0.87	0.0177	9606.ENSP00000356438,9606.ENSP00000356954,9606.ENSP00000362179,9606.ENSP00000368683	PTGS2,CTGF,ZC3H12A,EDN1
GO:0007346	regulation of mitotic cell cycle	11	608	0.44	0.018	9606.ENSP00000239223,9606.ENSP00000244869,9606.ENSP00000263056,9606.ENSP00000263339,9606.ENSP00000270162,9606.ENSP00000274289,9606.ENSP00000337862,9606.ENSP00000360025,9606.ENSP00000368683,9606.ENSP00000403683,9606.ENSP00000482657	DUSP1,EREG,MAP3K8,IL1A,SIK1,PLK2,OVOL1,GADD45A,EDN1,NABP1,MAP3K14
GO:0009746	response to hexose	5	138	0.74	0.018	9606.ENSP00000216037,9606.ENSP00000253063,9606.ENSP00000356438,9606.ENSP00000356954,9606.ENSP00000381282	XBP1,SESN2,PTGS2,CTGF,VIMP
GO:0046683	response to organophosphorus	5	138	0.74	0.018	9606.ENSP00000239223,9606.ENSP00000245919,9606.ENSP00000310170,9606.ENSP00000356438,9606.ENSP00000360266	DUSP1,FOSB,FOSL1,PTGS2,JUN
GO:0043255	regulation of carbohydrate biosynthetic process	4	83	0.86	0.0182	9606.ENSP00000253063,9606.ENSP00000270162,9606.ENSP00000380247,9606.ENSP00000381282	SESN2,SIK1,HRH1,VIMP
GO:0071560	cellular response to transforming growth factor beta stimulus	5	140	0.73	0.0188	9606.ENSP00000252809,9606.ENSP00000360266,9606.ENSP00000360762,9606.ENSP00000368683,9606.ENSP00000441543	GDF15,JUN,ANKRD1,EDN1,UBC
GO:0035871	protein K11-linked deubiquitination	2	10	1.48	0.0189	9606.ENSP00000326813,9606.ENSP00000481570	YOD1,TNFAIP3
GO:0061469	regulation of type B pancreatic cell proliferation	2	10	1.48	0.0189	9606.ENSP00000366702,9606.ENSP00000482027	ERRFI1,NR4A3
GO:0070862	negative regulation of protein exit from endoplasmic reticulum	2	10	1.48	0.0189	9606.ENSP00000326813,9606.ENSP00000344741	YOD1,INSIG1
GO:0001817	regulation of cytokine production	11	615	0.43	0.0192	9606.ENSP00000216037,9606.ENSP00000244869,9606.ENSP00000263339,9606.ENSP00000307235,9606.ENSP00000356438,9606.ENSP00000362179,9606.ENSP00000366702,9606.ENSP00000381282,9606.ENSP00000448665,9606.ENSP00000481570,9606.ENSP00000482027	XBP1,EREG,IL1A,EIF2AK3,PTGS2,ZC3H12A,ERRFI1,VIMP,DDIT3,TNFAIP3,NR4A3
GO:0036503	ERAD pathway	4	85	0.85	0.0193	9606.ENSP00000249356,9606.ENSP00000326813,9606.ENSP00000381282,9606.ENSP00000409555	DNAJB9,YOD1,VIMP,HERPUD1
GO:1901216	positive regulation of neuron death	4	85	0.85	0.0193	9606.ENSP00000307305,9606.ENSP00000358022,9606.ENSP00000360266,9606.ENSP00000448665	DDIT4,MCL1,JUN,DDIT3
GO:0032872	regulation of stress-activated MAPK cascade	6	208	0.64	0.0199	9606.ENSP00000355866,9606.ENSP00000356954,9606.ENSP00000360025,9606.ENSP00000362179,9606.ENSP00000368683,9606.ENSP00000368727	DUSP10,CTGF,GADD45A,ZC3H12A,EDN1,XDH
GO:0000079	regulation of cyclin-dependent protein serine/threonine kinase activity	4	86	0.85	0.02	9606.ENSP00000342344,9606.ENSP00000350633,9606.ENSP00000360025,9606.ENSP00000481570	CCNYL1,SERTAD1,GADD45A,TNFAIP3
GO:0019217	regulation of fatty acid metabolic process	4	86	0.85	0.02	9606.ENSP00000344741,9606.ENSP00000356438,9606.ENSP00000379503,9606.ENSP00000482027	INSIG1,PTGS2,PDP1,NR4A3
GO:0043281	regulation of cysteine-type endopeptidase activity involved in apoptotic process	6	209	0.64	0.0202	9606.ENSP00000307235,9606.ENSP00000356438,9606.ENSP00000356954,9606.ENSP00000368727,9606.ENSP00000398736,9606.ENSP00000409555	EIF2AK3,PTGS2,CTGF,XDH,CYR61,HERPUD1
GO:0051898	negative regulation of protein kinase B signaling	3	41	1.05	0.0203	9606.ENSP00000351209,9606.ENSP00000368727,9606.ENSP00000448665	EPHA2,XDH,DDIT3
GO:0051603	proteolysis involved in cellular protein catabolic process	10	532	0.46	0.0205	9606.ENSP00000216037,9606.ENSP00000249356,9606.ENSP00000326813,9606.ENSP00000381282,9606.ENSP00000409555,9606.ENSP00000441214,9606.ENSP00000441543,9606.ENSP00000448665,9606.ENSP00000473631,9606.ENSP00000481570	XBP1,DNAJB9,YOD1,VIMP,HERPUD1,USP36,UBC,DDIT3,DNAJC3,TNFAIP3
GO:0097327	response to antineoplastic agent	4	87	0.84	0.0205	9606.ENSP00000307305,9606.ENSP00000362179,9606.ENSP00000366702,9606.ENSP00000368683	DDIT4,ZC3H12A,ERRFI1,EDN1
GO:0060537	muscle tissue development	7	284	0.57	0.0209	9606.ENSP00000242480,9606.ENSP00000270162,9606.ENSP00000344352,9606.ENSP00000345393,9606.ENSP00000360762,9606.ENSP00000368305,9606.ENSP00000420612	EGR2,SIK1,ATF3,MAFF,ANKRD1,GPCPD1,TIPARP
GO:0031953	negative regulation of protein autophosphorylation	2	11	1.44	0.0213	9606.ENSP00000360266,9606.ENSP00000366702	JUN,ERRFI1
GO:0010506	regulation of autophagy	7	286	0.57	0.0214	9606.ENSP00000216037,9606.ENSP00000253063,9606.ENSP00000274289,9606.ENSP00000331748,9606.ENSP00000358022,9606.ENSP00000362179,9606.ENSP00000441214	XBP1,SESN2,PLK2,RAB12,MCL1,ZC3H12A,USP36
GO:0042307	positive regulation of protein import into nucleus	3	42	1.03	0.0214	9606.ENSP00000216037,9606.ENSP00000356438,9606.ENSP00000362179	XBP1,PTGS2,ZC3H12A
GO:0007517	muscle organ development	7	287	0.57	0.0218	9606.ENSP00000216037,9606.ENSP00000230990,9606.ENSP00000242480,9606.ENSP00000344352,9606.ENSP00000345393,9606.ENSP00000360762,9606.ENSP00000368305	XBP1,HBEGF,EGR2,ATF3,MAFF,ANKRD1,GPCPD1
GO:0006468	protein phosphorylation	14	923	0.36	0.0222	9606.ENSP00000230990,9606.ENSP00000244869,9606.ENSP00000256458,9606.ENSP00000261845,9606.ENSP00000263056,9606.ENSP00000270162,9606.ENSP00000274289,9606.ENSP00000279488,9606.ENSP00000307235,9606.ENSP00000351209,9606.ENSP00000356832,9606.ENSP00000358596,9606.ENSP00000441543,9606.ENSP00000482657	HBEGF,EREG,IRAK2,MAPK6,MAP3K8,SIK1,PLK2,DUSP6,EIF2AK3,EPHA2,SGK1,DUSP5,UBC,MAP3K14
GO:0001503	ossification	6	215	0.63	0.0223	9606.ENSP00000307235,9606.ENSP00000351209,9606.ENSP00000356438,9606.ENSP00000356954,9606.ENSP00000357842,9606.ENSP00000398736	EIF2AK3,EPHA2,PTGS2,CTGF,TUFT1,CYR61
GO:0030282	bone mineralization	3	43	1.02	0.0223	9606.ENSP00000307235,9606.ENSP00000356438,9606.ENSP00000357842	EIF2AK3,PTGS2,TUFT1
GO:0032874	positive regulation of stress-activated MAPK cascade	5	148	0.71	0.0223	9606.ENSP00000356954,9606.ENSP00000360025,9606.ENSP00000362179,9606.ENSP00000368683,9606.ENSP00000368727	CTGF,GADD45A,ZC3H12A,EDN1,XDH
GO:0042176	regulation of protein catabolic process	8	368	0.52	0.0223	9606.ENSP00000216037,9606.ENSP00000274289,9606.ENSP00000314619,9606.ENSP00000326813,9606.ENSP00000360690,9606.ENSP00000409555,9606.ENSP00000420612,9606.ENSP00000481570	XBP1,PLK2,ZFAND2A,YOD1,LONRF3,HERPUD1,TIPARP,TNFAIP3
GO:0051147	regulation of muscle cell differentiation	5	148	0.71	0.0223	9606.ENSP00000216037,9606.ENSP00000244869,9606.ENSP00000252809,9606.ENSP00000270162,9606.ENSP00000368683	XBP1,EREG,GDF15,SIK1,EDN1
GO:0000187	activation of MAPK activity	5	149	0.71	0.0227	9606.ENSP00000252809,9606.ENSP00000256458,9606.ENSP00000279488,9606.ENSP00000358596,9606.ENSP00000441543	GDF15,IRAK2,DUSP6,DUSP5,UBC
GO:0014074	response to purine-containing compound	5	151	0.7	0.0238	9606.ENSP00000239223,9606.ENSP00000245919,9606.ENSP00000310170,9606.ENSP00000356438,9606.ENSP00000360266	DUSP1,FOSB,FOSL1,PTGS2,JUN
GO:0051704	multi-organism process	28	2514	0.23	0.0238	9606.ENSP00000216037,9606.ENSP00000227752,9606.ENSP00000234420,9606.ENSP00000244869,9606.ENSP00000245919,9606.ENSP00000256458,9606.ENSP00000296026,9606.ENSP00000306512,9606.ENSP00000307305,9606.ENSP00000310170,9606.ENSP00000312988,9606.ENSP00000331748,9606.ENSP00000337862,9606.ENSP00000345393,9606.ENSP00000351209,9606.ENSP00000355866,9606.ENSP00000356438,9606.ENSP00000360266,9606.ENSP00000360762,…	XBP1,IL10RA,MSH6,EREG,FOSB,IRAK2,CXCL3,CXCL8,DDIT4,FOSL1,NFKBIB,RAB12,OVOL1,MAFF,EPHA2,DUSP10,PTGS2,JUN,ANKRD1,ZC3H12A,EDN1,VIMP,PGM3,CXCL2,UBC,DNAJC3,TNFAIP3,MAP3K14
GO:1903320	regulation of protein modification by small protein conjugation or removal	6	220	0.62	0.0243	9606.ENSP00000265138,9606.ENSP00000349547,9606.ENSP00000362179,9606.ENSP00000409555,9606.ENSP00000417706,9606.ENSP00000481570	ARRDC3,RASSF1,ZC3H12A,HERPUD1,DCUN1D2,TNFAIP3
GO:0006511	ubiquitin-dependent protein catabolic process	9	461	0.47	0.0246	9606.ENSP00000216037,9606.ENSP00000249356,9606.ENSP00000326813,9606.ENSP00000381282,9606.ENSP00000409555,9606.ENSP00000441214,9606.ENSP00000441543,9606.ENSP00000448665,9606.ENSP00000481570	XBP1,DNAJB9,YOD1,VIMP,HERPUD1,USP36,UBC,DDIT3,TNFAIP3
GO:0034198	cellular response to amino acid starvation	3	45	1	0.0246	9606.ENSP00000253063,9606.ENSP00000307235,9606.ENSP00000344352	SESN2,EIF2AK3,ATF3
GO:0030162	regulation of proteolysis	12	742	0.39	0.0255	9606.ENSP00000216037,9606.ENSP00000274289,9606.ENSP00000307235,9606.ENSP00000314619,9606.ENSP00000326813,9606.ENSP00000356438,9606.ENSP00000356954,9606.ENSP00000360690,9606.ENSP00000362179,9606.ENSP00000368727,9606.ENSP00000398736,9606.ENSP00000409555	XBP1,PLK2,EIF2AK3,ZFAND2A,YOD1,PTGS2,CTGF,LONRF3,ZC3H12A,XDH,CYR61,HERPUD1
GO:1903827	regulation of cellular protein localization	9	465	0.47	0.0257	9606.ENSP00000216037,9606.ENSP00000253063,9606.ENSP00000264711,9606.ENSP00000307235,9606.ENSP00000326813,9606.ENSP00000344741,9606.ENSP00000351209,9606.ENSP00000356438,9606.ENSP00000362179	XBP1,SESN2,DNAJC27,EIF2AK3,YOD1,INSIG1,EPHA2,PTGS2,ZC3H12A
GO:0010677	negative regulation of cellular carbohydrate metabolic process	3	46	1	0.0258	9606.ENSP00000270162,9606.ENSP00000307305,9606.ENSP00000381282	SIK1,DDIT4,VIMP
GO:0090257	regulation of muscle system process	6	224	0.61	0.0261	9606.ENSP00000356438,9606.ENSP00000356954,9606.ENSP00000362179,9606.ENSP00000366702,9606.ENSP00000368683,9606.ENSP00000482027	PTGS2,CTGF,ZC3H12A,ERRFI1,EDN1,NR4A3
GO:0031650	regulation of heat generation	2	13	1.37	0.0267	9606.ENSP00000265138,9606.ENSP00000356438	ARRDC3,PTGS2
GO:0051153	regulation of striated muscle cell differentiation	4	96	0.8	0.0267	9606.ENSP00000216037,9606.ENSP00000252809,9606.ENSP00000270162,9606.ENSP00000368683	XBP1,GDF15,SIK1,EDN1
GO:1903894	regulation of IRE1-mediated unfolded protein response	2	13	1.37	0.0267	9606.ENSP00000249356,9606.ENSP00000446479	DNAJB9,FICD
GO:0045933	positive regulation of muscle contraction	3	47	0.99	0.0269	9606.ENSP00000356438,9606.ENSP00000356954,9606.ENSP00000368683	PTGS2,CTGF,EDN1
GO:2001236	regulation of extrinsic apoptotic signaling pathway	5	158	0.68	0.0275	9606.ENSP00000263339,9606.ENSP00000326737,9606.ENSP00000344352,9606.ENSP00000358022,9606.ENSP00000481570	IL1A,TNFRSF12A,ATF3,MCL1,TNFAIP3
GO:0051591	response to cAMP	4	98	0.79	0.0282	9606.ENSP00000239223,9606.ENSP00000245919,9606.ENSP00000310170,9606.ENSP00000360266	DUSP1,FOSB,FOSL1,JUN
GO:0002682	regulation of immune system process	18	1391	0.29	0.0297	9606.ENSP00000216037,9606.ENSP00000234420,9606.ENSP00000244869,9606.ENSP00000256458,9606.ENSP00000263056,9606.ENSP00000263339,9606.ENSP00000296026,9606.ENSP00000306512,9606.ENSP00000355866,9606.ENSP00000360266,9606.ENSP00000361458,9606.ENSP00000362179,9606.ENSP00000368683,9606.ENSP00000381282,9606.ENSP00000427279,9606.ENSP00000441543,9606.ENSP00000481570,9606.ENSP00000482027	XBP1,MSH6,EREG,IRAK2,MAP3K8,IL1A,CXCL3,CXCL8,DUSP10,JUN,TSC22D3,ZC3H12A,EDN1,VIMP,CXCL2,UBC,TNFAIP3,NR4A3
GO:0043525	positive regulation of neuron apoptotic process	3	49	0.97	0.0297	9606.ENSP00000358022,9606.ENSP00000360266,9606.ENSP00000448665	MCL1,JUN,DDIT3
GO:0071850	mitotic cell cycle arrest	2	14	1.34	0.0297	9606.ENSP00000239223,9606.ENSP00000360025	DUSP1,GADD45A
GO:0071248	cellular response to metal ion	5	162	0.67	0.0298	9606.ENSP00000245919,9606.ENSP00000307235,9606.ENSP00000356438,9606.ENSP00000360266,9606.ENSP00000368683	FOSB,EIF2AK3,PTGS2,JUN,EDN1
GO:0009887	animal organ morphogenesis	13	865	0.36	0.0307	9606.ENSP00000244869,9606.ENSP00000273153,9606.ENSP00000344741,9606.ENSP00000351209,9606.ENSP00000356954,9606.ENSP00000357842,9606.ENSP00000360266,9606.ENSP00000360762,9606.ENSP00000366702,9606.ENSP00000368683,9606.ENSP00000398736,9606.ENSP00000420612,9606.ENSP00000482027	EREG,CSRNP1,INSIG1,EPHA2,CTGF,TUFT1,JUN,ANKRD1,ERRFI1,EDN1,CYR61,TIPARP,NR4A3
GO:0043200	response to amino acid	4	103	0.77	0.0327	9606.ENSP00000216037,9606.ENSP00000253063,9606.ENSP00000356954,9606.ENSP00000368683	XBP1,SESN2,CTGF,EDN1
GO:0008283	cell population proliferation	11	676	0.39	0.0335	9606.ENSP00000216037,9606.ENSP00000228437,9606.ENSP00000244869,9606.ENSP00000263339,9606.ENSP00000264444,9606.ENSP00000307305,9606.ENSP00000344741,9606.ENSP00000351209,9606.ENSP00000356954,9606.ENSP00000398736,9606.ENSP00000482027	XBP1,PRDM4,EREG,IL1A,MXD1,DDIT4,INSIG1,EPHA2,CTGF,CYR61,NR4A3
GO:0010467	gene expression	37	3733	0.18	0.0335	9606.ENSP00000216037,9606.ENSP00000228437,9606.ENSP00000242480,9606.ENSP00000244869,9606.ENSP00000245919,9606.ENSP00000256495,9606.ENSP00000264444,9606.ENSP00000273153,9606.ENSP00000273668,9606.ENSP00000277746,9606.ENSP00000310170,9606.ENSP00000312988,9606.ENSP00000325414,9606.ENSP00000337862,9606.ENSP00000338807,9606.ENSP00000344352,9606.ENSP00000345393,9606.ENSP00000350359,9606.ENSP00000350633,…	XBP1,PRDM4,EGR2,EREG,FOSB,BHLHE40,MXD1,CSRNP1,EAF2,NRBF2,FOSL1,NFKBIB,SERTAD3,OVOL1,ZBTB49,ATF3,MAFF,CREB5,SERTAD1,CTGF,PTBP2,JUN,YRDC,ZC3H12A,ZBTB43,TSPYL2,ZNF165,ZMYM5,TDG,ZNF527,NABP1,ESRP1,KLF6,THUMPD2,DDIT3,ZNF699,NR4A3
GO:0001706	endoderm formation	3	52	0.94	0.0339	9606.ENSP00000239223,9606.ENSP00000240100,9606.ENSP00000358596	DUSP1,DUSP4,DUSP5
GO:0008284	positive regulation of cell population proliferation	13	878	0.35	0.0341	9606.ENSP00000216037,9606.ENSP00000230990,9606.ENSP00000244869,9606.ENSP00000310170,9606.ENSP00000344352,9606.ENSP00000350633,9606.ENSP00000356438,9606.ENSP00000356954,9606.ENSP00000360266,9606.ENSP00000368683,9606.ENSP00000398736,9606.ENSP00000481570,9606.ENSP00000482027	XBP1,HBEGF,EREG,FOSL1,ATF3,SERTAD1,PTGS2,CTGF,JUN,EDN1,CYR61,TNFAIP3,NR4A3
GO:0051253	negative regulation of RNA metabolic process	17	1303	0.3	0.0341	9606.ENSP00000216037,9606.ENSP00000244869,9606.ENSP00000245919,9606.ENSP00000256495,9606.ENSP00000264444,9606.ENSP00000337862,9606.ENSP00000344352,9606.ENSP00000359216,9606.ENSP00000360266,9606.ENSP00000360762,9606.ENSP00000361458,9606.ENSP00000362179,9606.ENSP00000368683,9606.ENSP00000376611,9606.ENSP00000441543,9606.ENSP00000448665,9606.ENSP00000482027	XBP1,EREG,FOSB,BHLHE40,MXD1,OVOL1,ATF3,PTBP2,JUN,ANKRD1,TSC22D3,ZC3H12A,EDN1,TDG,UBC,DDIT3,NR4A3
GO:0032870	cellular response to hormone stimulus	10	585	0.41	0.0348	9606.ENSP00000216037,9606.ENSP00000239223,9606.ENSP00000245919,9606.ENSP00000270162,9606.ENSP00000307305,9606.ENSP00000360266,9606.ENSP00000366702,9606.ENSP00000368683,9606.ENSP00000381282,9606.ENSP00000482027	XBP1,DUSP1,FOSB,SIK1,DDIT4,JUN,ERRFI1,EDN1,VIMP,NR4A3
GO:0001101	response to acid chemical	7	323	0.52	0.0363	9606.ENSP00000216037,9606.ENSP00000239223,9606.ENSP00000253063,9606.ENSP00000356438,9606.ENSP00000356954,9606.ENSP00000362179,9606.ENSP00000368683	XBP1,DUSP1,SESN2,PTGS2,CTGF,ZC3H12A,EDN1
GO:0007567	parturition	2	16	1.28	0.0363	9606.ENSP00000345393,9606.ENSP00000368683	MAFF,EDN1
GO:0010042	response to manganese ion	2	16	1.28	0.0363	9606.ENSP00000307235,9606.ENSP00000356438	EIF2AK3,PTGS2
GO:0030970	retrograde protein transport, ER to cytosol	2	16	1.28	0.0363	9606.ENSP00000381282,9606.ENSP00000409555	VIMP,HERPUD1
GO:0051447	negative regulation of meiotic cell cycle	2	16	1.28	0.0363	9606.ENSP00000239223,9606.ENSP00000337862	DUSP1,OVOL1
GO:0090335	regulation of brown fat cell differentiation	2	16	1.28	0.0363	9606.ENSP00000355866,9606.ENSP00000356438	DUSP10,PTGS2
GO:1904754	positive regulation of vascular associated smooth muscle cell migration	2	16	1.28	0.0363	9606.ENSP00000216037,9606.ENSP00000482027	XBP1,NR4A3
GO:0010611	regulation of cardiac muscle hypertrophy	3	54	0.93	0.0365	9606.ENSP00000366702,9606.ENSP00000368683,9606.ENSP00000482027	ERRFI1,EDN1,NR4A3
GO:0045428	regulation of nitric oxide biosynthetic process	3	54	0.93	0.0365	9606.ENSP00000356438,9606.ENSP00000362179,9606.ENSP00000368683	PTGS2,ZC3H12A,EDN1
GO:0045840	positive regulation of mitotic nuclear division	3	54	0.93	0.0365	9606.ENSP00000244869,9606.ENSP00000263339,9606.ENSP00000368683	EREG,IL1A,EDN1
GO:0051241	negative regulation of multicellular organismal process	15	1098	0.32	0.0365	9606.ENSP00000252809,9606.ENSP00000265138,9606.ENSP00000273668,9606.ENSP00000274289,9606.ENSP00000307235,9606.ENSP00000355866,9606.ENSP00000356438,9606.ENSP00000361458,9606.ENSP00000362179,9606.ENSP00000366702,9606.ENSP00000368683,9606.ENSP00000368727,9606.ENSP00000381282,9606.ENSP00000448665,9606.ENSP00000481570	GDF15,ARRDC3,EAF2,PLK2,EIF2AK3,DUSP10,PTGS2,TSC22D3,ZC3H12A,ERRFI1,EDN1,XDH,VIMP,DDIT3,TNFAIP3
GO:0032103	positive regulation of response to external stimulus	9	499	0.44	0.0367	9606.ENSP00000244869,9606.ENSP00000256458,9606.ENSP00000296026,9606.ENSP00000306512,9606.ENSP00000356438,9606.ENSP00000368683,9606.ENSP00000427279,9606.ENSP00000441543,9606.ENSP00000481570	EREG,IRAK2,CXCL3,CXCL8,PTGS2,EDN1,CXCL2,UBC,TNFAIP3
GO:0002376	immune system process	26	2370	0.22	0.0369	9606.ENSP00000075120,9606.ENSP00000216037,9606.ENSP00000234420,9606.ENSP00000249356,9606.ENSP00000256458,9606.ENSP00000263056,9606.ENSP00000263339,9606.ENSP00000280551,9606.ENSP00000296026,9606.ENSP00000306512,9606.ENSP00000307305,9606.ENSP00000331748,9606.ENSP00000351209,9606.ENSP00000360266,9606.ENSP00000362179,9606.ENSP00000368683,9606.ENSP00000380247,9606.ENSP00000419923,9606.ENSP00000420612,…	SLC2A3,XBP1,MSH6,DNAJB9,IRAK2,MAP3K8,IL1A,SEC24D,CXCL3,CXCL8,DDIT4,RAB12,EPHA2,JUN,ZC3H12A,EDN1,HRH1,KLF6,TIPARP,PGM3,CXCL2,UBC,DNAJC3,TNFAIP3,NR4A3,MAP3K14
GO:0007613	memory	4	109	0.75	0.0378	9606.ENSP00000274289,9606.ENSP00000356438,9606.ENSP00000356832,9606.ENSP00000380247	PLK2,PTGS2,SGK1,HRH1
GO:0010830	regulation of myotube differentiation	3	55	0.92	0.0378	9606.ENSP00000216037,9606.ENSP00000252809,9606.ENSP00000270162	XBP1,GDF15,SIK1
GO:0046890	regulation of lipid biosynthetic process	5	174	0.64	0.0378	9606.ENSP00000216037,9606.ENSP00000270162,9606.ENSP00000344741,9606.ENSP00000356438,9606.ENSP00000398736	XBP1,SIK1,INSIG1,PTGS2,CYR61
GO:0071385	cellular response to glucocorticoid stimulus	3	55	0.92	0.0378	9606.ENSP00000307305,9606.ENSP00000366702,9606.ENSP00000368683	DDIT4,ERRFI1,EDN1
GO:1903522	regulation of blood circulation	6	249	0.56	0.0387	9606.ENSP00000230990,9606.ENSP00000356438,9606.ENSP00000356954,9606.ENSP00000362179,9606.ENSP00000368683,9606.ENSP00000380247	HBEGF,PTGS2,CTGF,ZC3H12A,EDN1,HRH1
GO:2000242	negative regulation of reproductive process	3	57	0.9	0.041	9606.ENSP00000239223,9606.ENSP00000273668,9606.ENSP00000337862	DUSP1,EAF2,OVOL1
GO:0046822	regulation of nucleocytoplasmic transport	4	113	0.73	0.0421	9606.ENSP00000216037,9606.ENSP00000264711,9606.ENSP00000356438,9606.ENSP00000362179	XBP1,DNAJC27,PTGS2,ZC3H12A
GO:0001516	prostaglandin biosynthetic process	2	18	1.23	0.0427	9606.ENSP00000356438,9606.ENSP00000368683	PTGS2,EDN1
GO:0051412	response to corticosterone	2	18	1.23	0.0427	9606.ENSP00000245919,9606.ENSP00000310170	FOSB,FOSL1
GO:0006952	defense response	16	1234	0.29	0.0433	9606.ENSP00000256458,9606.ENSP00000263339,9606.ENSP00000296026,9606.ENSP00000306512,9606.ENSP00000307305,9606.ENSP00000310170,9606.ENSP00000331748,9606.ENSP00000356438,9606.ENSP00000360266,9606.ENSP00000362179,9606.ENSP00000368683,9606.ENSP00000380247,9606.ENSP00000427279,9606.ENSP00000473631,9606.ENSP00000481570,9606.ENSP00000482657	IRAK2,IL1A,CXCL3,CXCL8,DDIT4,FOSL1,RAB12,PTGS2,JUN,ZC3H12A,EDN1,HRH1,CXCL2,DNAJC3,TNFAIP3,MAP3K14
GO:0001704	formation of primary germ layer	4	115	0.72	0.044	9606.ENSP00000239223,9606.ENSP00000240100,9606.ENSP00000358596,9606.ENSP00000482027	DUSP1,DUSP4,DUSP5,NR4A3
GO:0010038	response to metal ion	7	339	0.5	0.044	9606.ENSP00000239223,9606.ENSP00000245919,9606.ENSP00000263339,9606.ENSP00000307235,9606.ENSP00000356438,9606.ENSP00000360266,9606.ENSP00000368683	DUSP1,FOSB,IL1A,EIF2AK3,PTGS2,JUN,EDN1
GO:0035821	modification of morphology or physiology of other organism	5	182	0.62	0.044	9606.ENSP00000296026,9606.ENSP00000306512,9606.ENSP00000360266,9606.ENSP00000362179,9606.ENSP00000427279	CXCL3,CXCL8,JUN,ZC3H12A,CXCL2
GO:0045600	positive regulation of fat cell differentiation	3	59	0.89	0.044	9606.ENSP00000216037,9606.ENSP00000356438,9606.ENSP00000362179	XBP1,PTGS2,ZC3H12A
GO:0043153	entrainment of circadian clock by photoperiod	2	19	1.2	0.046	9606.ENSP00000256495,9606.ENSP00000270162	BHLHE40,SIK1
GO:0050728	negative regulation of inflammatory response	4	117	0.71	0.046	9606.ENSP00000355866,9606.ENSP00000362179,9606.ENSP00000381282,9606.ENSP00000481570	DUSP10,ZC3H12A,VIMP,TNFAIP3
GO:0071498	cellular response to fluid shear stress	2	19	1.2	0.046	9606.ENSP00000216037,9606.ENSP00000356438	XBP1,PTGS2
GO:1902074	response to salt	2	19	1.2	0.046	9606.ENSP00000362179,9606.ENSP00000368683	ZC3H12A,EDN1
GO:0019229	regulation of vasoconstriction	3	61	0.87	0.0472	9606.ENSP00000356438,9606.ENSP00000368683,9606.ENSP00000380247	PTGS2,EDN1,HRH1
GO:0042474	middle ear morphogenesis	2	20	1.18	0.0496	9606.ENSP00000344741,9606.ENSP00000368683	INSIG1,EDN1

## Sheet: Cntrl_vs_Coinfec_KEGG_Up_24h
Supplementary table S8: Results from the Gene Ontology (GO) analysis in the category for biological process complete (GObp) and Pathway Enrichment (KEGG pathways) in co-infected cells at 24 hpi.
#term ID	term description	observed gene count	background gene count	strength	false discovery rate	matching proteins in your network (IDs)	matching proteins in your network (labels)
hsa04657	IL-17 signaling pathway	9	92	1.17	3.11e-06	9606.ENSP00000245919,9606.ENSP00000261845,9606.ENSP00000296026,9606.ENSP00000306512,9606.ENSP00000310170,9606.ENSP00000356438,9606.ENSP00000360266,9606.ENSP00000427279,9606.ENSP00000481570	FOSB,MAPK6,CXCL3,CXCL8,FOSL1,PTGS2,JUN,CXCL2,TNFAIP3
hsa04010	MAPK signaling pathway	13	293	0.83	5.64e-06	9606.ENSP00000239223,9606.ENSP00000240100,9606.ENSP00000244869,9606.ENSP00000263056,9606.ENSP00000263339,9606.ENSP00000279488,9606.ENSP00000351209,9606.ENSP00000355866,9606.ENSP00000358596,9606.ENSP00000360025,9606.ENSP00000360266,9606.ENSP00000448665,9606.ENSP00000482657	DUSP1,DUSP4,EREG,MAP3K8,IL1A,DUSP6,EPHA2,DUSP10,DUSP5,GADD45A,JUN,DDIT3,MAP3K14
hsa04668	TNF signaling pathway	9	108	1.1	5.64e-06	9606.ENSP00000263056,9606.ENSP00000296026,9606.ENSP00000350359,9606.ENSP00000356438,9606.ENSP00000360266,9606.ENSP00000368683,9606.ENSP00000427279,9606.ENSP00000481570,9606.ENSP00000482657	MAP3K8,CXCL3,CREB5,PTGS2,JUN,EDN1,CXCL2,TNFAIP3,MAP3K14
hsa04141	Protein processing in endoplasmic reticulum	9	161	0.93	6.72e-05	9606.ENSP00000200453,9606.ENSP00000216037,9606.ENSP00000280551,9606.ENSP00000307235,9606.ENSP00000326813,9606.ENSP00000381282,9606.ENSP00000409555,9606.ENSP00000448665,9606.ENSP00000473631	PPP1R15A,XBP1,SEC24D,EIF2AK3,YOD1,VIMP,HERPUD1,DDIT3,DNAJC3
hsa04210	Apoptosis	6	135	0.83	0.0088	9606.ENSP00000307235,9606.ENSP00000358022,9606.ENSP00000360025,9606.ENSP00000360266,9606.ENSP00000448665,9606.ENSP00000482657	EIF2AK3,MCL1,GADD45A,JUN,DDIT3,MAP3K14
hsa05132	Salmonella infection	5	84	0.96	0.0088	9606.ENSP00000263339,9606.ENSP00000296026,9606.ENSP00000306512,9606.ENSP00000360266,9606.ENSP00000427279	IL1A,CXCL3,CXCL8,JUN,CXCL2
hsa04064	NF-kappa B signaling pathway	5	93	0.91	0.0098	9606.ENSP00000306512,9606.ENSP00000356438,9606.ENSP00000427279,9606.ENSP00000481570,9606.ENSP00000482657	CXCL8,PTGS2,CXCL2,TNFAIP3,MAP3K14
hsa04932	Non-alcoholic fatty liver disease (NAFLD)	6	149	0.79	0.0102	9606.ENSP00000216037,9606.ENSP00000263339,9606.ENSP00000306512,9606.ENSP00000307235,9606.ENSP00000360266,9606.ENSP00000448665	XBP1,IL1A,CXCL8,EIF2AK3,JUN,DDIT3
hsa04621	NOD-like receptor signaling pathway	6	166	0.74	0.0157	9606.ENSP00000296026,9606.ENSP00000306512,9606.ENSP00000312988,9606.ENSP00000360266,9606.ENSP00000427279,9606.ENSP00000481570	CXCL3,CXCL8,NFKBIB,JUN,CXCL2,TNFAIP3
hsa05120	Epithelial cell signaling in Helicobacter pylori infection	4	66	0.96	0.0157	9606.ENSP00000230990,9606.ENSP00000306512,9606.ENSP00000360266,9606.ENSP00000482657	HBEGF,CXCL8,JUN,MAP3K14
hsa05164	Influenza A	6	168	0.73	0.0157	9606.ENSP00000263339,9606.ENSP00000306512,9606.ENSP00000307235,9606.ENSP00000312988,9606.ENSP00000360266,9606.ENSP00000473631	IL1A,CXCL8,EIF2AK3,NFKBIB,JUN,DNAJC3
hsa05140	Leishmaniasis	4	70	0.94	0.0175	9606.ENSP00000263339,9606.ENSP00000312988,9606.ENSP00000356438,9606.ENSP00000360266	IL1A,NFKBIB,PTGS2,JUN
hsa04380	Osteoclast differentiation	5	124	0.79	0.0183	9606.ENSP00000245919,9606.ENSP00000263339,9606.ENSP00000310170,9606.ENSP00000360266,9606.ENSP00000482657	FOSB,IL1A,FOSL1,JUN,MAP3K14
hsa05169	Epstein-Barr virus infection	6	194	0.67	0.0218	9606.ENSP00000227752,9606.ENSP00000307235,9606.ENSP00000312988,9606.ENSP00000360266,9606.ENSP00000481570,9606.ENSP00000482657	IL10RA,EIF2AK3,NFKBIB,JUN,TNFAIP3,MAP3K14
hsa05210	Colorectal cancer	4	85	0.85	0.0275	9606.ENSP00000234420,9606.ENSP00000244869,9606.ENSP00000360025,9606.ENSP00000360266	MSH6,EREG,GADD45A,JUN
hsa05219	Bladder cancer	3	41	1.05	0.0276	9606.ENSP00000230990,9606.ENSP00000306512,9606.ENSP00000349547	HBEGF,CXCL8,RASSF1
hsa04660	T cell receptor signaling pathway	4	99	0.79	0.0396	9606.ENSP00000263056,9606.ENSP00000312988,9606.ENSP00000360266,9606.ENSP00000482657	MAP3K8,NFKBIB,JUN,MAP3K14
hsa04933	AGE-RAGE signaling pathway in diabetic complications	4	98	0.79	0.0396	9606.ENSP00000263339,9606.ENSP00000306512,9606.ENSP00000360266,9606.ENSP00000368683	IL1A,CXCL8,JUN,EDN1
hsa05030	Cocaine addiction	3	49	0.97	0.0396	9606.ENSP00000245919,9606.ENSP00000350359,9606.ENSP00000360266	FOSB,CREB5,JUN
hsa05202	Transcriptional misregulation in cancer	5	169	0.65	0.0429	9606.ENSP00000279488,9606.ENSP00000306512,9606.ENSP00000360025,9606.ENSP00000448665,9606.ENSP00000482027	DUSP6,CXCL8,GADD45A,DDIT3,NR4A3
hsa05134	Legionellosis	3	54	0.93	0.0437	9606.ENSP00000296026,9606.ENSP00000306512,9606.ENSP00000427279	CXCL3,CXCL8,CXCL2
hsa05166	HTLV-I infection	6	250	0.56	0.0461	9606.ENSP00000216037,9606.ENSP00000242480,9606.ENSP00000310170,9606.ENSP00000344352,9606.ENSP00000360266,9606.ENSP00000482657	XBP1,EGR2,FOSL1,ATF3,JUN,MAP3K14

## Sheet: Cntrl_vs_Coinfec_Bio_Down_24h
Supplementary table S8: Results from the Gene Ontology (GO) analysis in the category for biological process complete (GObp) and Pathway Enrichment (KEGG pathways) in co-infected cells at 24 hpi.
No GObp significantly enriched among downregulated genes

## Sheet: Cntrl_vs_Coinfec_KEGG_Down_24h
Supplementary table S8: Results from the Gene Ontology (GO) analysis in the category for biological process complete (GObp) and Pathway Enrichment (KEGG pathways) in co-infected cells at 24 hpi.
No KEGG pathways significantly enriched among downregulated genes
