# Supplementary material for: Gene expression profile of HCT-8 cells following single or co-infections with Cryptosporidium parvum and bovine coronavirus
Source: Research Square preprint supplement (doi:10.21203/rs.3.rs-2673942/v1), 2023-03-23
Supplement: Supplementary file 6 [file 857db3fb4d169ce483b4a973.xlsx]

## Sheet: Cntrl_vs_Crypto_72h_Bio
Supplementary table S7: Results from the Gene Ontology (GO) analysis in the category for biological process complete (GObp) and Pathway Enrichment (KEGG pathways) in Cryptosporidium parvum infected cells at 72 hpi.
#term ID	term description	observed gene count	background gene count	strength	false discovery rate	matching proteins in your network (IDs)	matching proteins in your network (labels)
GO:0051171	regulation of nitrogen compound metabolic process	37	5827	0.42	1.06e-08	9606.ENSP00000215631,9606.ENSP00000230990,9606.ENSP00000235382,9606.ENSP00000238647,9606.ENSP00000239223,9606.ENSP00000239938,9606.ENSP00000242480,9606.ENSP00000244534,9606.ENSP00000245919,9606.ENSP00000248071,9606.ENSP00000270162,9606.ENSP00000279488,9606.ENSP00000290551,9606.ENSP00000306245,9606.ENSP00000312150,9606.ENSP00000316948,9606.ENSP00000319053,9606.ENSP00000330074,9606.ENSP00000332194,…	GADD45B,HBEGF,RGS2,IRF2BPL,DUSP1,EGR1,EGR2,HIST1H1D,FOSB,KLF2,SIK1,DUSP6,BTG2,FOS,TRIB1,CLK4,ZNF77,HIST1H1B,HIST2H2AC,NEIL1,ZNF441,CTGF,DUSP5,JUN,ID1,COMMD8,ZBED8,IGF2,CYR61,FASTKD1,FAM200A,KLF6,CCNC,IER2,ZFP36,C17orf96,HIST1H3B
GO:0080090	regulation of primary metabolic process	37	5982	0.41	1.25e-08	9606.ENSP00000215631,9606.ENSP00000230990,9606.ENSP00000235382,9606.ENSP00000238647,9606.ENSP00000239223,9606.ENSP00000239938,9606.ENSP00000242480,9606.ENSP00000244534,9606.ENSP00000245919,9606.ENSP00000248071,9606.ENSP00000270162,9606.ENSP00000279488,9606.ENSP00000290551,9606.ENSP00000306245,9606.ENSP00000312150,9606.ENSP00000316948,9606.ENSP00000319053,9606.ENSP00000330074,9606.ENSP00000332194,…	GADD45B,HBEGF,RGS2,IRF2BPL,DUSP1,EGR1,EGR2,HIST1H1D,FOSB,KLF2,SIK1,DUSP6,BTG2,FOS,TRIB1,CLK4,ZNF77,HIST1H1B,HIST2H2AC,NEIL1,ZNF441,CTGF,DUSP5,JUN,ID1,COMMD8,ZBED8,IGF2,CYR61,FASTKD1,FAM200A,KLF6,CCNC,IER2,ZFP36,C17orf96,HIST1H3B
GO:0031323	regulation of cellular metabolic process	37	6082	0.4	1.36e-08	9606.ENSP00000215631,9606.ENSP00000230990,9606.ENSP00000235382,9606.ENSP00000238647,9606.ENSP00000239223,9606.ENSP00000239938,9606.ENSP00000242480,9606.ENSP00000244534,9606.ENSP00000245919,9606.ENSP00000248071,9606.ENSP00000270162,9606.ENSP00000279488,9606.ENSP00000290551,9606.ENSP00000306245,9606.ENSP00000312150,9606.ENSP00000316948,9606.ENSP00000319053,9606.ENSP00000330074,9606.ENSP00000332194,…	GADD45B,HBEGF,RGS2,IRF2BPL,DUSP1,EGR1,EGR2,HIST1H1D,FOSB,KLF2,SIK1,DUSP6,BTG2,FOS,TRIB1,CLK4,ZNF77,HIST1H1B,HIST2H2AC,NEIL1,ZNF441,CTGF,DUSP5,JUN,ID1,COMMD8,ZBED8,IGF2,CYR61,FASTKD1,FAM200A,KLF6,CCNC,IER2,ZFP36,C17orf96,HIST1H3B
GO:0060255	regulation of macromolecule metabolic process	37	6072	0.4	1.36e-08	9606.ENSP00000215631,9606.ENSP00000230990,9606.ENSP00000235382,9606.ENSP00000238647,9606.ENSP00000239223,9606.ENSP00000239938,9606.ENSP00000242480,9606.ENSP00000244534,9606.ENSP00000245919,9606.ENSP00000248071,9606.ENSP00000270162,9606.ENSP00000279488,9606.ENSP00000290551,9606.ENSP00000306245,9606.ENSP00000312150,9606.ENSP00000316948,9606.ENSP00000319053,9606.ENSP00000330074,9606.ENSP00000332194,…	GADD45B,HBEGF,RGS2,IRF2BPL,DUSP1,EGR1,EGR2,HIST1H1D,FOSB,KLF2,SIK1,DUSP6,BTG2,FOS,TRIB1,CLK4,ZNF77,HIST1H1B,HIST2H2AC,NEIL1,ZNF441,CTGF,DUSP5,JUN,ID1,COMMD8,ZBED8,IGF2,CYR61,FASTKD1,FAM200A,KLF6,CCNC,IER2,ZFP36,C17orf96,HIST1H3B
GO:0019219	regulation of nucleobase-containing compound metabolic process	31	4133	0.49	1.66e-08	9606.ENSP00000238647,9606.ENSP00000239223,9606.ENSP00000239938,9606.ENSP00000242480,9606.ENSP00000244534,9606.ENSP00000245919,9606.ENSP00000248071,9606.ENSP00000270162,9606.ENSP00000290551,9606.ENSP00000306245,9606.ENSP00000312150,9606.ENSP00000316948,9606.ENSP00000319053,9606.ENSP00000330074,9606.ENSP00000332194,9606.ENSP00000347170,9606.ENSP00000350576,9606.ENSP00000360266,9606.ENSP00000365280,…	IRF2BPL,DUSP1,EGR1,EGR2,HIST1H1D,FOSB,KLF2,SIK1,BTG2,FOS,TRIB1,CLK4,ZNF77,HIST1H1B,HIST2H2AC,NEIL1,ZNF441,JUN,ID1,COMMD8,ZBED8,IGF2,CYR61,FASTKD1,FAM200A,KLF6,CCNC,IER2,ZFP36,C17orf96,HIST1H3B
GO:0009889	regulation of biosynthetic process	31	4337	0.47	5e-08	9606.ENSP00000230990,9606.ENSP00000235382,9606.ENSP00000238647,9606.ENSP00000239223,9606.ENSP00000239938,9606.ENSP00000242480,9606.ENSP00000244534,9606.ENSP00000245919,9606.ENSP00000248071,9606.ENSP00000270162,9606.ENSP00000290551,9606.ENSP00000306245,9606.ENSP00000312150,9606.ENSP00000319053,9606.ENSP00000330074,9606.ENSP00000332194,9606.ENSP00000350576,9606.ENSP00000356954,9606.ENSP00000360266,…	HBEGF,RGS2,IRF2BPL,DUSP1,EGR1,EGR2,HIST1H1D,FOSB,KLF2,SIK1,BTG2,FOS,TRIB1,ZNF77,HIST1H1B,HIST2H2AC,ZNF441,CTGF,JUN,ID1,COMMD8,ZBED8,IGF2,CYR61,FAM200A,KLF6,CCNC,IER2,ZFP36,C17orf96,HIST1H3B
GO:2000112	regulation of cellular macromolecule biosynthetic process	30	4050	0.49	5e-08	9606.ENSP00000230990,9606.ENSP00000235382,9606.ENSP00000238647,9606.ENSP00000239223,9606.ENSP00000239938,9606.ENSP00000242480,9606.ENSP00000244534,9606.ENSP00000245919,9606.ENSP00000248071,9606.ENSP00000270162,9606.ENSP00000290551,9606.ENSP00000306245,9606.ENSP00000312150,9606.ENSP00000319053,9606.ENSP00000330074,9606.ENSP00000332194,9606.ENSP00000350576,9606.ENSP00000360266,9606.ENSP00000365280,…	HBEGF,RGS2,IRF2BPL,DUSP1,EGR1,EGR2,HIST1H1D,FOSB,KLF2,SIK1,BTG2,FOS,TRIB1,ZNF77,HIST1H1B,HIST2H2AC,ZNF441,JUN,ID1,COMMD8,ZBED8,IGF2,CYR61,FAM200A,KLF6,CCNC,IER2,ZFP36,C17orf96,HIST1H3B
GO:0051252	regulation of RNA metabolic process	29	3890	0.49	8.12e-08	9606.ENSP00000238647,9606.ENSP00000239938,9606.ENSP00000242480,9606.ENSP00000244534,9606.ENSP00000245919,9606.ENSP00000248071,9606.ENSP00000270162,9606.ENSP00000290551,9606.ENSP00000306245,9606.ENSP00000312150,9606.ENSP00000316948,9606.ENSP00000319053,9606.ENSP00000330074,9606.ENSP00000332194,9606.ENSP00000350576,9606.ENSP00000360266,9606.ENSP00000365280,9606.ENSP00000370984,9606.ENSP00000386184,…	IRF2BPL,EGR1,EGR2,HIST1H1D,FOSB,KLF2,SIK1,BTG2,FOS,TRIB1,CLK4,ZNF77,HIST1H1B,HIST2H2AC,ZNF441,JUN,ID1,COMMD8,ZBED8,IGF2,CYR61,FASTKD1,FAM200A,KLF6,CCNC,IER2,ZFP36,C17orf96,HIST1H3B
GO:0010468	regulation of gene expression	31	4533	0.45	8.76e-08	9606.ENSP00000235382,9606.ENSP00000238647,9606.ENSP00000239938,9606.ENSP00000242480,9606.ENSP00000244534,9606.ENSP00000245919,9606.ENSP00000248071,9606.ENSP00000270162,9606.ENSP00000290551,9606.ENSP00000306245,9606.ENSP00000312150,9606.ENSP00000316948,9606.ENSP00000319053,9606.ENSP00000330074,9606.ENSP00000332194,9606.ENSP00000350576,9606.ENSP00000356954,9606.ENSP00000360266,9606.ENSP00000365280,…	RGS2,IRF2BPL,EGR1,EGR2,HIST1H1D,FOSB,KLF2,SIK1,BTG2,FOS,TRIB1,CLK4,ZNF77,HIST1H1B,HIST2H2AC,ZNF441,CTGF,JUN,ID1,COMMD8,ZBED8,IGF2,CYR61,FASTKD1,FAM200A,KLF6,CCNC,IER2,ZFP36,C17orf96,HIST1H3B
GO:0006355	regulation of transcription, DNA-templated	27	3661	0.49	5.7e-07	9606.ENSP00000238647,9606.ENSP00000239938,9606.ENSP00000242480,9606.ENSP00000244534,9606.ENSP00000245919,9606.ENSP00000248071,9606.ENSP00000270162,9606.ENSP00000290551,9606.ENSP00000306245,9606.ENSP00000312150,9606.ENSP00000319053,9606.ENSP00000330074,9606.ENSP00000332194,9606.ENSP00000350576,9606.ENSP00000360266,9606.ENSP00000365280,9606.ENSP00000370984,9606.ENSP00000386184,9606.ENSP00000391826,…	IRF2BPL,EGR1,EGR2,HIST1H1D,FOSB,KLF2,SIK1,BTG2,FOS,TRIB1,ZNF77,HIST1H1B,HIST2H2AC,ZNF441,JUN,ID1,COMMD8,ZBED8,IGF2,CYR61,FAM200A,KLF6,CCNC,IER2,ZFP36,C17orf96,HIST1H3B
GO:0031324	negative regulation of cellular metabolic process	22	2463	0.57	1.09e-06	9606.ENSP00000215631,9606.ENSP00000230990,9606.ENSP00000235382,9606.ENSP00000238647,9606.ENSP00000239223,9606.ENSP00000239938,9606.ENSP00000244534,9606.ENSP00000245919,9606.ENSP00000248071,9606.ENSP00000270162,9606.ENSP00000279488,9606.ENSP00000290551,9606.ENSP00000312150,9606.ENSP00000330074,9606.ENSP00000332194,9606.ENSP00000347170,9606.ENSP00000358596,9606.ENSP00000360266,9606.ENSP00000365280,…	GADD45B,HBEGF,RGS2,IRF2BPL,DUSP1,EGR1,HIST1H1D,FOSB,KLF2,SIK1,DUSP6,BTG2,TRIB1,HIST1H1B,HIST2H2AC,NEIL1,DUSP5,JUN,ID1,IGF2,ZFP36,HIST1H3B
GO:0009892	negative regulation of metabolic process	23	2762	0.54	1.47e-06	9606.ENSP00000215631,9606.ENSP00000230990,9606.ENSP00000235382,9606.ENSP00000238647,9606.ENSP00000239223,9606.ENSP00000239938,9606.ENSP00000244534,9606.ENSP00000245919,9606.ENSP00000248071,9606.ENSP00000270162,9606.ENSP00000279488,9606.ENSP00000290551,9606.ENSP00000312150,9606.ENSP00000330074,9606.ENSP00000332194,9606.ENSP00000347170,9606.ENSP00000356954,9606.ENSP00000358596,9606.ENSP00000360266,…	GADD45B,HBEGF,RGS2,IRF2BPL,DUSP1,EGR1,HIST1H1D,FOSB,KLF2,SIK1,DUSP6,BTG2,TRIB1,HIST1H1B,HIST2H2AC,NEIL1,CTGF,DUSP5,JUN,ID1,IGF2,ZFP36,HIST1H3B
GO:0051172	negative regulation of nitrogen compound metabolic process	21	2307	0.58	1.82e-06	9606.ENSP00000215631,9606.ENSP00000230990,9606.ENSP00000235382,9606.ENSP00000238647,9606.ENSP00000239223,9606.ENSP00000239938,9606.ENSP00000244534,9606.ENSP00000245919,9606.ENSP00000248071,9606.ENSP00000279488,9606.ENSP00000290551,9606.ENSP00000312150,9606.ENSP00000330074,9606.ENSP00000332194,9606.ENSP00000347170,9606.ENSP00000358596,9606.ENSP00000360266,9606.ENSP00000365280,9606.ENSP00000391826,…	GADD45B,HBEGF,RGS2,IRF2BPL,DUSP1,EGR1,HIST1H1D,FOSB,KLF2,DUSP6,BTG2,TRIB1,HIST1H1B,HIST2H2AC,NEIL1,DUSP5,JUN,ID1,IGF2,ZFP36,HIST1H3B
GO:0010605	negative regulation of macromolecule metabolic process	22	2558	0.55	1.84e-06	9606.ENSP00000215631,9606.ENSP00000230990,9606.ENSP00000235382,9606.ENSP00000238647,9606.ENSP00000239223,9606.ENSP00000239938,9606.ENSP00000244534,9606.ENSP00000245919,9606.ENSP00000248071,9606.ENSP00000279488,9606.ENSP00000290551,9606.ENSP00000312150,9606.ENSP00000330074,9606.ENSP00000332194,9606.ENSP00000347170,9606.ENSP00000356954,9606.ENSP00000358596,9606.ENSP00000360266,9606.ENSP00000365280,…	GADD45B,HBEGF,RGS2,IRF2BPL,DUSP1,EGR1,HIST1H1D,FOSB,KLF2,DUSP6,BTG2,TRIB1,HIST1H1B,HIST2H2AC,NEIL1,CTGF,DUSP5,JUN,ID1,IGF2,ZFP36,HIST1H3B
GO:0031327	negative regulation of cellular biosynthetic process	17	1479	0.68	2.35e-06	9606.ENSP00000230990,9606.ENSP00000235382,9606.ENSP00000238647,9606.ENSP00000239223,9606.ENSP00000239938,9606.ENSP00000244534,9606.ENSP00000245919,9606.ENSP00000248071,9606.ENSP00000270162,9606.ENSP00000290551,9606.ENSP00000330074,9606.ENSP00000332194,9606.ENSP00000360266,9606.ENSP00000365280,9606.ENSP00000391826,9606.ENSP00000469647,9606.ENSP00000484841	HBEGF,RGS2,IRF2BPL,DUSP1,EGR1,HIST1H1D,FOSB,KLF2,SIK1,BTG2,HIST1H1B,HIST2H2AC,JUN,ID1,IGF2,ZFP36,HIST1H3B
GO:0006357	regulation of transcription by RNA polymerase II	22	2633	0.54	2.78e-06	9606.ENSP00000238647,9606.ENSP00000239938,9606.ENSP00000242480,9606.ENSP00000244534,9606.ENSP00000245919,9606.ENSP00000248071,9606.ENSP00000290551,9606.ENSP00000306245,9606.ENSP00000319053,9606.ENSP00000330074,9606.ENSP00000350576,9606.ENSP00000360266,9606.ENSP00000365280,9606.ENSP00000386184,9606.ENSP00000391826,9606.ENSP00000398736,9606.ENSP00000411372,9606.ENSP00000419923,9606.ENSP00000428982,…	IRF2BPL,EGR1,EGR2,HIST1H1D,FOSB,KLF2,BTG2,FOS,ZNF77,HIST1H1B,ZNF441,JUN,ID1,ZBED8,IGF2,CYR61,FAM200A,KLF6,CCNC,IER2,ZFP36,C17orf96
GO:2000113	negative regulation of cellular macromolecule biosynthetic process	16	1348	0.69	3.88e-06	9606.ENSP00000230990,9606.ENSP00000235382,9606.ENSP00000238647,9606.ENSP00000239223,9606.ENSP00000239938,9606.ENSP00000244534,9606.ENSP00000245919,9606.ENSP00000248071,9606.ENSP00000290551,9606.ENSP00000330074,9606.ENSP00000332194,9606.ENSP00000360266,9606.ENSP00000365280,9606.ENSP00000391826,9606.ENSP00000469647,9606.ENSP00000484841	HBEGF,RGS2,IRF2BPL,DUSP1,EGR1,HIST1H1D,FOSB,KLF2,BTG2,HIST1H1B,HIST2H2AC,JUN,ID1,IGF2,ZFP36,HIST1H3B
GO:0050794	regulation of cellular process	42	10484	0.22	1.11e-05	9606.ENSP00000215631,9606.ENSP00000230990,9606.ENSP00000231948,9606.ENSP00000235382,9606.ENSP00000238647,9606.ENSP00000239223,9606.ENSP00000239938,9606.ENSP00000242480,9606.ENSP00000244534,9606.ENSP00000245919,9606.ENSP00000248071,9606.ENSP00000259874,9606.ENSP00000263087,9606.ENSP00000270162,9606.ENSP00000272233,9606.ENSP00000279488,9606.ENSP00000290551,9606.ENSP00000306245,9606.ENSP00000312150,…	GADD45B,HBEGF,CRBN,RGS2,IRF2BPL,DUSP1,EGR1,EGR2,HIST1H1D,FOSB,KLF2,IER3,ITGAE,SIK1,RHOB,DUSP6,BTG2,FOS,TRIB1,CLK4,ZNF77,HIST1H1B,HIST2H2AC,NEIL1,ZNF441,CTGF,CD58,DUSP5,JUN,ID1,COMMD8,ZBED8,IGF2,CYR61,FASTKD1,FAM200A,KLF6,CCNC,IER2,ZFP36,C17orf96,HIST1H3B
GO:0048523	negative regulation of cellular process	27	4454	0.4	2.12e-05	9606.ENSP00000215631,9606.ENSP00000230990,9606.ENSP00000231948,9606.ENSP00000235382,9606.ENSP00000238647,9606.ENSP00000239223,9606.ENSP00000239938,9606.ENSP00000244534,9606.ENSP00000245919,9606.ENSP00000248071,9606.ENSP00000259874,9606.ENSP00000270162,9606.ENSP00000272233,9606.ENSP00000279488,9606.ENSP00000290551,9606.ENSP00000312150,9606.ENSP00000330074,9606.ENSP00000332194,9606.ENSP00000347170,…	GADD45B,HBEGF,CRBN,RGS2,IRF2BPL,DUSP1,EGR1,HIST1H1D,FOSB,KLF2,IER3,SIK1,RHOB,DUSP6,BTG2,TRIB1,HIST1H1B,HIST2H2AC,NEIL1,CTGF,DUSP5,JUN,ID1,IGF2,CYR61,ZFP36,HIST1H3B
GO:0010604	positive regulation of macromolecule metabolic process	22	3081	0.47	3.66e-05	9606.ENSP00000215631,9606.ENSP00000230990,9606.ENSP00000238647,9606.ENSP00000239938,9606.ENSP00000242480,9606.ENSP00000245919,9606.ENSP00000248071,9606.ENSP00000279488,9606.ENSP00000290551,9606.ENSP00000306245,9606.ENSP00000312150,9606.ENSP00000330074,9606.ENSP00000356954,9606.ENSP00000358596,9606.ENSP00000360266,9606.ENSP00000365280,9606.ENSP00000391826,9606.ENSP00000398736,9606.ENSP00000419923,…	GADD45B,HBEGF,IRF2BPL,EGR1,EGR2,FOSB,KLF2,DUSP6,BTG2,FOS,TRIB1,HIST1H1B,CTGF,DUSP5,JUN,ID1,IGF2,CYR61,KLF6,CCNC,IER2,ZFP36
GO:0045934	negative regulation of nucleobase-containing compound metabolic process	15	1424	0.64	4.33e-05	9606.ENSP00000238647,9606.ENSP00000239223,9606.ENSP00000239938,9606.ENSP00000244534,9606.ENSP00000245919,9606.ENSP00000248071,9606.ENSP00000290551,9606.ENSP00000330074,9606.ENSP00000332194,9606.ENSP00000347170,9606.ENSP00000360266,9606.ENSP00000365280,9606.ENSP00000391826,9606.ENSP00000469647,9606.ENSP00000484841	IRF2BPL,DUSP1,EGR1,HIST1H1D,FOSB,KLF2,BTG2,HIST1H1B,HIST2H2AC,NEIL1,JUN,ID1,IGF2,ZFP36,HIST1H3B
GO:1901700	response to oxygen-containing compound	15	1427	0.64	4.33e-05	9606.ENSP00000235382,9606.ENSP00000239223,9606.ENSP00000239938,9606.ENSP00000242480,9606.ENSP00000245919,9606.ENSP00000248071,9606.ENSP00000272233,9606.ENSP00000290551,9606.ENSP00000306245,9606.ENSP00000312150,9606.ENSP00000356954,9606.ENSP00000360266,9606.ENSP00000365280,9606.ENSP00000391826,9606.ENSP00000469647	RGS2,DUSP1,EGR1,EGR2,FOSB,KLF2,RHOB,BTG2,FOS,TRIB1,CTGF,JUN,ID1,IGF2,ZFP36
GO:0010243	response to organonitrogen compound	12	876	0.76	4.65e-05	9606.ENSP00000235382,9606.ENSP00000239223,9606.ENSP00000239938,9606.ENSP00000242480,9606.ENSP00000245919,9606.ENSP00000248071,9606.ENSP00000290551,9606.ENSP00000306245,9606.ENSP00000356954,9606.ENSP00000360266,9606.ENSP00000365280,9606.ENSP00000391826	RGS2,DUSP1,EGR1,EGR2,FOSB,KLF2,BTG2,FOS,CTGF,JUN,ID1,IGF2
GO:0043408	regulation of MAPK cascade	11	712	0.81	4.65e-05	9606.ENSP00000215631,9606.ENSP00000235382,9606.ENSP00000239223,9606.ENSP00000279488,9606.ENSP00000312150,9606.ENSP00000356954,9606.ENSP00000358596,9606.ENSP00000360266,9606.ENSP00000365280,9606.ENSP00000391826,9606.ENSP00000398736	GADD45B,RGS2,DUSP1,DUSP6,TRIB1,CTGF,DUSP5,JUN,ID1,IGF2,CYR61
GO:0051173	positive regulation of nitrogen compound metabolic process	21	2946	0.47	6.79e-05	9606.ENSP00000215631,9606.ENSP00000230990,9606.ENSP00000238647,9606.ENSP00000239938,9606.ENSP00000242480,9606.ENSP00000245919,9606.ENSP00000248071,9606.ENSP00000279488,9606.ENSP00000290551,9606.ENSP00000306245,9606.ENSP00000312150,9606.ENSP00000330074,9606.ENSP00000356954,9606.ENSP00000358596,9606.ENSP00000360266,9606.ENSP00000391826,9606.ENSP00000398736,9606.ENSP00000419923,9606.ENSP00000428982,…	GADD45B,HBEGF,IRF2BPL,EGR1,EGR2,FOSB,KLF2,DUSP6,BTG2,FOS,TRIB1,HIST1H1B,CTGF,DUSP5,JUN,IGF2,CYR61,KLF6,CCNC,IER2,ZFP36
GO:0009719	response to endogenous stimulus	14	1353	0.63	0.00011	9606.ENSP00000239223,9606.ENSP00000239938,9606.ENSP00000242480,9606.ENSP00000245919,9606.ENSP00000248071,9606.ENSP00000270162,9606.ENSP00000290551,9606.ENSP00000306245,9606.ENSP00000356954,9606.ENSP00000360266,9606.ENSP00000365280,9606.ENSP00000391826,9606.ENSP00000465617,9606.ENSP00000469647	DUSP1,EGR1,EGR2,FOSB,KLF2,SIK1,BTG2,FOS,CTGF,JUN,ID1,IGF2,IER2,ZFP36
GO:0031325	positive regulation of cellular metabolic process	21	3060	0.46	0.00011	9606.ENSP00000215631,9606.ENSP00000230990,9606.ENSP00000238647,9606.ENSP00000239938,9606.ENSP00000242480,9606.ENSP00000245919,9606.ENSP00000248071,9606.ENSP00000279488,9606.ENSP00000290551,9606.ENSP00000306245,9606.ENSP00000312150,9606.ENSP00000330074,9606.ENSP00000356954,9606.ENSP00000358596,9606.ENSP00000360266,9606.ENSP00000391826,9606.ENSP00000398736,9606.ENSP00000419923,9606.ENSP00000428982,…	GADD45B,HBEGF,IRF2BPL,EGR1,EGR2,FOSB,KLF2,DUSP6,BTG2,FOS,TRIB1,HIST1H1B,CTGF,DUSP5,JUN,IGF2,CYR61,KLF6,CCNC,IER2,ZFP36
GO:0048522	positive regulation of cellular process	27	4898	0.36	0.00011	9606.ENSP00000215631,9606.ENSP00000230990,9606.ENSP00000235382,9606.ENSP00000238647,9606.ENSP00000239223,9606.ENSP00000239938,9606.ENSP00000242480,9606.ENSP00000245919,9606.ENSP00000248071,9606.ENSP00000270162,9606.ENSP00000272233,9606.ENSP00000279488,9606.ENSP00000290551,9606.ENSP00000306245,9606.ENSP00000312150,9606.ENSP00000330074,9606.ENSP00000356954,9606.ENSP00000358501,9606.ENSP00000358596,…	GADD45B,HBEGF,RGS2,IRF2BPL,DUSP1,EGR1,EGR2,FOSB,KLF2,SIK1,RHOB,DUSP6,BTG2,FOS,TRIB1,HIST1H1B,CTGF,CD58,DUSP5,JUN,ID1,IGF2,CYR61,KLF6,CCNC,IER2,ZFP36
GO:0000122	negative regulation of transcription by RNA polymerase II	11	809	0.75	0.00012	9606.ENSP00000238647,9606.ENSP00000239938,9606.ENSP00000244534,9606.ENSP00000245919,9606.ENSP00000248071,9606.ENSP00000290551,9606.ENSP00000330074,9606.ENSP00000360266,9606.ENSP00000365280,9606.ENSP00000391826,9606.ENSP00000469647	IRF2BPL,EGR1,HIST1H1D,FOSB,KLF2,BTG2,HIST1H1B,JUN,ID1,IGF2,ZFP36
GO:0001932	regulation of protein phosphorylation	14	1370	0.63	0.00012	9606.ENSP00000215631,9606.ENSP00000230990,9606.ENSP00000235382,9606.ENSP00000239223,9606.ENSP00000239938,9606.ENSP00000279488,9606.ENSP00000312150,9606.ENSP00000356954,9606.ENSP00000358596,9606.ENSP00000360266,9606.ENSP00000365280,9606.ENSP00000391826,9606.ENSP00000398736,9606.ENSP00000428982	GADD45B,HBEGF,RGS2,DUSP1,EGR1,DUSP6,TRIB1,CTGF,DUSP5,JUN,ID1,IGF2,CYR61,CCNC
GO:0045892	negative regulation of transcription, DNA-templated	13	1169	0.67	0.00012	9606.ENSP00000238647,9606.ENSP00000239938,9606.ENSP00000244534,9606.ENSP00000245919,9606.ENSP00000248071,9606.ENSP00000290551,9606.ENSP00000330074,9606.ENSP00000332194,9606.ENSP00000360266,9606.ENSP00000365280,9606.ENSP00000391826,9606.ENSP00000469647,9606.ENSP00000484841	IRF2BPL,EGR1,HIST1H1D,FOSB,KLF2,BTG2,HIST1H1B,HIST2H2AC,JUN,ID1,IGF2,ZFP36,HIST1H3B
GO:0010942	positive regulation of cell death	10	663	0.8	0.00013	9606.ENSP00000215631,9606.ENSP00000239223,9606.ENSP00000239938,9606.ENSP00000270162,9606.ENSP00000272233,9606.ENSP00000279488,9606.ENSP00000306245,9606.ENSP00000356954,9606.ENSP00000360266,9606.ENSP00000398736	GADD45B,DUSP1,EGR1,SIK1,RHOB,DUSP6,FOS,CTGF,JUN,CYR61
GO:0044260	cellular macromolecule metabolic process	31	6413	0.3	0.00013	9606.ENSP00000230990,9606.ENSP00000231948,9606.ENSP00000239223,9606.ENSP00000239938,9606.ENSP00000242480,9606.ENSP00000244534,9606.ENSP00000245919,9606.ENSP00000248071,9606.ENSP00000270162,9606.ENSP00000279488,9606.ENSP00000290551,9606.ENSP00000306245,9606.ENSP00000312150,9606.ENSP00000316948,9606.ENSP00000319053,9606.ENSP00000347170,9606.ENSP00000350576,9606.ENSP00000356954,9606.ENSP00000358596,…	HBEGF,CRBN,DUSP1,EGR1,EGR2,HIST1H1D,FOSB,KLF2,SIK1,DUSP6,BTG2,FOS,TRIB1,CLK4,ZNF77,NEIL1,ZNF441,CTGF,DUSP5,JUN,ID1,COMMD8,IGF2,CYR61,FASTKD1,KLF6,CCNC,IER2,ZFP36,C17orf96,HIST1H3B
GO:0009725	response to hormone	11	854	0.73	0.00017	9606.ENSP00000239223,9606.ENSP00000239938,9606.ENSP00000242480,9606.ENSP00000245919,9606.ENSP00000270162,9606.ENSP00000290551,9606.ENSP00000306245,9606.ENSP00000356954,9606.ENSP00000360266,9606.ENSP00000391826,9606.ENSP00000469647	DUSP1,EGR1,EGR2,FOSB,SIK1,BTG2,FOS,CTGF,JUN,IGF2,ZFP36
GO:0010629	negative regulation of gene expression	15	1670	0.57	0.00018	9606.ENSP00000235382,9606.ENSP00000238647,9606.ENSP00000239938,9606.ENSP00000244534,9606.ENSP00000245919,9606.ENSP00000248071,9606.ENSP00000290551,9606.ENSP00000330074,9606.ENSP00000332194,9606.ENSP00000356954,9606.ENSP00000360266,9606.ENSP00000365280,9606.ENSP00000391826,9606.ENSP00000469647,9606.ENSP00000484841	RGS2,IRF2BPL,EGR1,HIST1H1D,FOSB,KLF2,BTG2,HIST1H1B,HIST2H2AC,CTGF,JUN,ID1,IGF2,ZFP36,HIST1H3B
GO:0014070	response to organic cyclic compound	11	873	0.72	0.0002	9606.ENSP00000239223,9606.ENSP00000239938,9606.ENSP00000245919,9606.ENSP00000248071,9606.ENSP00000279488,9606.ENSP00000290551,9606.ENSP00000306245,9606.ENSP00000356954,9606.ENSP00000360266,9606.ENSP00000365280,9606.ENSP00000469647	DUSP1,EGR1,FOSB,KLF2,DUSP6,BTG2,FOS,CTGF,JUN,ID1,ZFP36
GO:0031399	regulation of protein modification process	15	1747	0.55	0.00029	9606.ENSP00000215631,9606.ENSP00000230990,9606.ENSP00000235382,9606.ENSP00000239223,9606.ENSP00000239938,9606.ENSP00000279488,9606.ENSP00000312150,9606.ENSP00000330074,9606.ENSP00000356954,9606.ENSP00000358596,9606.ENSP00000360266,9606.ENSP00000365280,9606.ENSP00000391826,9606.ENSP00000398736,9606.ENSP00000428982	GADD45B,HBEGF,RGS2,DUSP1,EGR1,DUSP6,TRIB1,HIST1H1B,CTGF,DUSP5,JUN,ID1,IGF2,CYR61,CCNC
GO:0035914	skeletal muscle cell differentiation	4	52	1.51	0.00029	9606.ENSP00000239938,9606.ENSP00000242480,9606.ENSP00000290551,9606.ENSP00000306245	EGR1,EGR2,BTG2,FOS
GO:0045944	positive regulation of transcription by RNA polymerase II	12	1104	0.66	0.00029	9606.ENSP00000238647,9606.ENSP00000239938,9606.ENSP00000242480,9606.ENSP00000245919,9606.ENSP00000248071,9606.ENSP00000306245,9606.ENSP00000360266,9606.ENSP00000391826,9606.ENSP00000398736,9606.ENSP00000419923,9606.ENSP00000428982,9606.ENSP00000465617	IRF2BPL,EGR1,EGR2,FOSB,KLF2,FOS,JUN,IGF2,CYR61,KLF6,CCNC,IER2
GO:0046677	response to antibiotic	7	305	0.98	0.00029	9606.ENSP00000235382,9606.ENSP00000239223,9606.ENSP00000239938,9606.ENSP00000248071,9606.ENSP00000272233,9606.ENSP00000360266,9606.ENSP00000365280	RGS2,DUSP1,EGR1,KLF2,RHOB,JUN,ID1
GO:0051348	negative regulation of transferase activity	7	310	0.97	0.00029	9606.ENSP00000215631,9606.ENSP00000235382,9606.ENSP00000239223,9606.ENSP00000279488,9606.ENSP00000312150,9606.ENSP00000358596,9606.ENSP00000469647	GADD45B,RGS2,DUSP1,DUSP6,TRIB1,DUSP5,ZFP36
GO:0010033	response to organic substance	19	2815	0.45	0.00036	9606.ENSP00000235382,9606.ENSP00000239223,9606.ENSP00000239938,9606.ENSP00000242480,9606.ENSP00000245919,9606.ENSP00000248071,9606.ENSP00000270162,9606.ENSP00000279488,9606.ENSP00000290551,9606.ENSP00000306245,9606.ENSP00000312150,9606.ENSP00000356954,9606.ENSP00000358501,9606.ENSP00000360266,9606.ENSP00000365280,9606.ENSP00000391826,9606.ENSP00000465617,9606.ENSP00000469647,9606.ENSP00000484841	RGS2,DUSP1,EGR1,EGR2,FOSB,KLF2,SIK1,DUSP6,BTG2,FOS,TRIB1,CTGF,CD58,JUN,ID1,IGF2,IER2,ZFP36,HIST1H3B
GO:0051338	regulation of transferase activity	11	964	0.68	0.00042	9606.ENSP00000215631,9606.ENSP00000235382,9606.ENSP00000239223,9606.ENSP00000239938,9606.ENSP00000279488,9606.ENSP00000312150,9606.ENSP00000358596,9606.ENSP00000391826,9606.ENSP00000398736,9606.ENSP00000428982,9606.ENSP00000469647	GADD45B,RGS2,DUSP1,EGR1,DUSP6,TRIB1,DUSP5,IGF2,CYR61,CCNC,ZFP36
GO:0010628	positive regulation of gene expression	15	1826	0.53	0.00043	9606.ENSP00000238647,9606.ENSP00000239938,9606.ENSP00000242480,9606.ENSP00000245919,9606.ENSP00000248071,9606.ENSP00000306245,9606.ENSP00000356954,9606.ENSP00000360266,9606.ENSP00000365280,9606.ENSP00000391826,9606.ENSP00000398736,9606.ENSP00000419923,9606.ENSP00000428982,9606.ENSP00000465617,9606.ENSP00000469647	IRF2BPL,EGR1,EGR2,FOSB,KLF2,FOS,CTGF,JUN,ID1,IGF2,CYR61,KLF6,CCNC,IER2,ZFP36
GO:0045859	regulation of protein kinase activity	10	788	0.72	0.00043	9606.ENSP00000215631,9606.ENSP00000235382,9606.ENSP00000239223,9606.ENSP00000239938,9606.ENSP00000279488,9606.ENSP00000312150,9606.ENSP00000358596,9606.ENSP00000391826,9606.ENSP00000398736,9606.ENSP00000428982	GADD45B,RGS2,DUSP1,EGR1,DUSP6,TRIB1,DUSP5,IGF2,CYR61,CCNC
GO:0051254	positive regulation of RNA metabolic process	14	1596	0.56	0.00043	9606.ENSP00000238647,9606.ENSP00000239938,9606.ENSP00000242480,9606.ENSP00000245919,9606.ENSP00000248071,9606.ENSP00000290551,9606.ENSP00000306245,9606.ENSP00000360266,9606.ENSP00000391826,9606.ENSP00000398736,9606.ENSP00000419923,9606.ENSP00000428982,9606.ENSP00000465617,9606.ENSP00000469647	IRF2BPL,EGR1,EGR2,FOSB,KLF2,BTG2,FOS,JUN,IGF2,CYR61,KLF6,CCNC,IER2,ZFP36
GO:0009888	tissue development	14	1626	0.55	0.00051	9606.ENSP00000230990,9606.ENSP00000239223,9606.ENSP00000239938,9606.ENSP00000242480,9606.ENSP00000248071,9606.ENSP00000270162,9606.ENSP00000272233,9606.ENSP00000290551,9606.ENSP00000306245,9606.ENSP00000356954,9606.ENSP00000358596,9606.ENSP00000360266,9606.ENSP00000365280,9606.ENSP00000398736	HBEGF,DUSP1,EGR1,EGR2,KLF2,SIK1,RHOB,BTG2,FOS,CTGF,DUSP5,JUN,ID1,CYR61
GO:0010941	regulation of cell death	14	1638	0.55	0.00054	9606.ENSP00000215631,9606.ENSP00000239223,9606.ENSP00000239938,9606.ENSP00000259874,9606.ENSP00000270162,9606.ENSP00000272233,9606.ENSP00000279488,9606.ENSP00000290551,9606.ENSP00000306245,9606.ENSP00000356954,9606.ENSP00000360266,9606.ENSP00000365280,9606.ENSP00000398736,9606.ENSP00000469647	GADD45B,DUSP1,EGR1,IER3,SIK1,RHOB,DUSP6,BTG2,FOS,CTGF,JUN,ID1,CYR61,ZFP36
GO:0071900	regulation of protein serine/threonine kinase activity	8	488	0.83	0.00055	9606.ENSP00000215631,9606.ENSP00000235382,9606.ENSP00000239223,9606.ENSP00000279488,9606.ENSP00000312150,9606.ENSP00000358596,9606.ENSP00000391826,9606.ENSP00000428982	GADD45B,RGS2,DUSP1,DUSP6,TRIB1,DUSP5,IGF2,CCNC
GO:0051246	regulation of protein metabolic process	18	2668	0.45	0.00059	9606.ENSP00000215631,9606.ENSP00000230990,9606.ENSP00000235382,9606.ENSP00000239223,9606.ENSP00000239938,9606.ENSP00000248071,9606.ENSP00000279488,9606.ENSP00000290551,9606.ENSP00000312150,9606.ENSP00000330074,9606.ENSP00000356954,9606.ENSP00000358596,9606.ENSP00000360266,9606.ENSP00000365280,9606.ENSP00000391826,9606.ENSP00000398736,9606.ENSP00000428982,9606.ENSP00000469647	GADD45B,HBEGF,RGS2,DUSP1,EGR1,KLF2,DUSP6,BTG2,TRIB1,HIST1H1B,CTGF,DUSP5,JUN,ID1,IGF2,CYR61,CCNC,ZFP36
GO:0070848	response to growth factor	8	507	0.82	0.00066	9606.ENSP00000239938,9606.ENSP00000279488,9606.ENSP00000306245,9606.ENSP00000356954,9606.ENSP00000360266,9606.ENSP00000365280,9606.ENSP00000465617,9606.ENSP00000469647	EGR1,DUSP6,FOS,CTGF,JUN,ID1,IER2,ZFP36
GO:0043407	negative regulation of MAP kinase activity	4	72	1.36	0.00077	9606.ENSP00000235382,9606.ENSP00000239223,9606.ENSP00000279488,9606.ENSP00000358596	RGS2,DUSP1,DUSP6,DUSP5
GO:0006469	negative regulation of protein kinase activity	6	254	0.99	0.00081	9606.ENSP00000215631,9606.ENSP00000235382,9606.ENSP00000239223,9606.ENSP00000279488,9606.ENSP00000312150,9606.ENSP00000358596	GADD45B,RGS2,DUSP1,DUSP6,TRIB1,DUSP5
GO:0032268	regulation of cellular protein metabolic process	17	2486	0.45	0.00085	9606.ENSP00000215631,9606.ENSP00000230990,9606.ENSP00000235382,9606.ENSP00000239223,9606.ENSP00000239938,9606.ENSP00000279488,9606.ENSP00000290551,9606.ENSP00000312150,9606.ENSP00000330074,9606.ENSP00000356954,9606.ENSP00000358596,9606.ENSP00000360266,9606.ENSP00000365280,9606.ENSP00000391826,9606.ENSP00000398736,9606.ENSP00000428982,9606.ENSP00000469647	GADD45B,HBEGF,RGS2,DUSP1,EGR1,DUSP6,BTG2,TRIB1,HIST1H1B,CTGF,DUSP5,JUN,ID1,IGF2,CYR61,CCNC,ZFP36
GO:0031960	response to corticosteroid	5	154	1.13	0.00087	9606.ENSP00000239223,9606.ENSP00000245919,9606.ENSP00000306245,9606.ENSP00000356954,9606.ENSP00000469647	DUSP1,FOSB,FOS,CTGF,ZFP36
GO:0042981	regulation of apoptotic process	13	1501	0.56	0.00087	9606.ENSP00000215631,9606.ENSP00000239223,9606.ENSP00000239938,9606.ENSP00000259874,9606.ENSP00000270162,9606.ENSP00000272233,9606.ENSP00000279488,9606.ENSP00000290551,9606.ENSP00000356954,9606.ENSP00000360266,9606.ENSP00000365280,9606.ENSP00000398736,9606.ENSP00000469647	GADD45B,DUSP1,EGR1,IER3,SIK1,RHOB,DUSP6,BTG2,CTGF,JUN,ID1,CYR61,ZFP36
GO:0000188	inactivation of MAPK activity	3	26	1.68	0.00098	9606.ENSP00000239223,9606.ENSP00000279488,9606.ENSP00000358596	DUSP1,DUSP6,DUSP5
GO:0042493	response to drug	10	900	0.67	0.001	9606.ENSP00000235382,9606.ENSP00000239223,9606.ENSP00000239938,9606.ENSP00000245919,9606.ENSP00000248071,9606.ENSP00000272233,9606.ENSP00000279488,9606.ENSP00000306245,9606.ENSP00000360266,9606.ENSP00000365280	RGS2,DUSP1,EGR1,FOSB,KLF2,RHOB,DUSP6,FOS,JUN,ID1
GO:0071495	cellular response to endogenous stimulus	11	1106	0.62	0.001	9606.ENSP00000239223,9606.ENSP00000239938,9606.ENSP00000245919,9606.ENSP00000248071,9606.ENSP00000270162,9606.ENSP00000306245,9606.ENSP00000356954,9606.ENSP00000360266,9606.ENSP00000365280,9606.ENSP00000391826,9606.ENSP00000469647	DUSP1,EGR1,FOSB,KLF2,SIK1,FOS,CTGF,JUN,ID1,IGF2,ZFP36
GO:1902531	regulation of intracellular signal transduction	14	1764	0.52	0.001	9606.ENSP00000215631,9606.ENSP00000230990,9606.ENSP00000235382,9606.ENSP00000239223,9606.ENSP00000259874,9606.ENSP00000272233,9606.ENSP00000279488,9606.ENSP00000312150,9606.ENSP00000356954,9606.ENSP00000358596,9606.ENSP00000360266,9606.ENSP00000365280,9606.ENSP00000391826,9606.ENSP00000398736	GADD45B,HBEGF,RGS2,DUSP1,IER3,RHOB,DUSP6,TRIB1,CTGF,DUSP5,JUN,ID1,IGF2,CYR61
GO:0044092	negative regulation of molecular function	11	1119	0.61	0.0011	9606.ENSP00000215631,9606.ENSP00000235382,9606.ENSP00000239223,9606.ENSP00000270162,9606.ENSP00000279488,9606.ENSP00000312150,9606.ENSP00000347170,9606.ENSP00000358596,9606.ENSP00000360266,9606.ENSP00000365280,9606.ENSP00000469647	GADD45B,RGS2,DUSP1,SIK1,DUSP6,TRIB1,NEIL1,DUSP5,JUN,ID1,ZFP36
GO:0051385	response to mineralocorticoid	3	29	1.63	0.0012	9606.ENSP00000245919,9606.ENSP00000306245,9606.ENSP00000356954	FOSB,FOS,CTGF
GO:0001933	negative regulation of protein phosphorylation	7	422	0.84	0.0013	9606.ENSP00000215631,9606.ENSP00000235382,9606.ENSP00000239223,9606.ENSP00000279488,9606.ENSP00000312150,9606.ENSP00000358596,9606.ENSP00000360266	GADD45B,RGS2,DUSP1,DUSP6,TRIB1,DUSP5,JUN
GO:0001934	positive regulation of protein phosphorylation	10	941	0.65	0.0013	9606.ENSP00000215631,9606.ENSP00000230990,9606.ENSP00000239938,9606.ENSP00000279488,9606.ENSP00000356954,9606.ENSP00000358596,9606.ENSP00000360266,9606.ENSP00000391826,9606.ENSP00000398736,9606.ENSP00000428982	GADD45B,HBEGF,EGR1,DUSP6,CTGF,DUSP5,JUN,IGF2,CYR61,CCNC
GO:0051247	positive regulation of protein metabolic process	13	1587	0.53	0.0013	9606.ENSP00000215631,9606.ENSP00000230990,9606.ENSP00000239938,9606.ENSP00000248071,9606.ENSP00000279488,9606.ENSP00000312150,9606.ENSP00000330074,9606.ENSP00000356954,9606.ENSP00000358596,9606.ENSP00000360266,9606.ENSP00000391826,9606.ENSP00000398736,9606.ENSP00000428982	GADD45B,HBEGF,EGR1,KLF2,DUSP6,TRIB1,HIST1H1B,CTGF,DUSP5,JUN,IGF2,CYR61,CCNC
GO:0031401	positive regulation of protein modification process	11	1149	0.6	0.0014	9606.ENSP00000215631,9606.ENSP00000230990,9606.ENSP00000239938,9606.ENSP00000279488,9606.ENSP00000330074,9606.ENSP00000356954,9606.ENSP00000358596,9606.ENSP00000360266,9606.ENSP00000391826,9606.ENSP00000398736,9606.ENSP00000428982	GADD45B,HBEGF,EGR1,DUSP6,HIST1H1B,CTGF,DUSP5,JUN,IGF2,CYR61,CCNC
GO:1901652	response to peptide	7	431	0.83	0.0015	9606.ENSP00000239938,9606.ENSP00000242480,9606.ENSP00000248071,9606.ENSP00000290551,9606.ENSP00000356954,9606.ENSP00000365280,9606.ENSP00000391826	EGR1,EGR2,KLF2,BTG2,CTGF,ID1,IGF2
GO:0042221	response to chemical	22	4153	0.34	0.0016	9606.ENSP00000230990,9606.ENSP00000235382,9606.ENSP00000239223,9606.ENSP00000239938,9606.ENSP00000242480,9606.ENSP00000245919,9606.ENSP00000248071,9606.ENSP00000270162,9606.ENSP00000272233,9606.ENSP00000279488,9606.ENSP00000290551,9606.ENSP00000306245,9606.ENSP00000312150,9606.ENSP00000356954,9606.ENSP00000358501,9606.ENSP00000360266,9606.ENSP00000365280,9606.ENSP00000391826,9606.ENSP00000398736,…	HBEGF,RGS2,DUSP1,EGR1,EGR2,FOSB,KLF2,SIK1,RHOB,DUSP6,BTG2,FOS,TRIB1,CTGF,CD58,JUN,ID1,IGF2,CYR61,IER2,ZFP36,HIST1H3B
GO:0006366	transcription by RNA polymerase II	9	784	0.68	0.0017	9606.ENSP00000239938,9606.ENSP00000242480,9606.ENSP00000245919,9606.ENSP00000306245,9606.ENSP00000356954,9606.ENSP00000360266,9606.ENSP00000419923,9606.ENSP00000428982,9606.ENSP00000465617	EGR1,EGR2,FOSB,FOS,CTGF,JUN,KLF6,CCNC,IER2
GO:0043065	positive regulation of apoptotic process	8	604	0.74	0.0017	9606.ENSP00000215631,9606.ENSP00000239223,9606.ENSP00000270162,9606.ENSP00000272233,9606.ENSP00000279488,9606.ENSP00000356954,9606.ENSP00000360266,9606.ENSP00000398736	GADD45B,DUSP1,SIK1,RHOB,DUSP6,CTGF,JUN,CYR61
GO:0000302	response to reactive oxygen species	5	189	1.04	0.0018	9606.ENSP00000239223,9606.ENSP00000248071,9606.ENSP00000272233,9606.ENSP00000306245,9606.ENSP00000360266	DUSP1,KLF2,RHOB,FOS,JUN
GO:0051591	response to cAMP	4	98	1.23	0.0018	9606.ENSP00000239223,9606.ENSP00000245919,9606.ENSP00000306245,9606.ENSP00000360266	DUSP1,FOSB,FOS,JUN
GO:0061061	muscle structure development	7	457	0.8	0.0019	9606.ENSP00000230990,9606.ENSP00000239938,9606.ENSP00000242480,9606.ENSP00000270162,9606.ENSP00000290551,9606.ENSP00000306245,9606.ENSP00000391826	HBEGF,EGR1,EGR2,SIK1,BTG2,FOS,IGF2
GO:0009636	response to toxic substance	7	468	0.79	0.0021	9606.ENSP00000235382,9606.ENSP00000239223,9606.ENSP00000239938,9606.ENSP00000248071,9606.ENSP00000272233,9606.ENSP00000306245,9606.ENSP00000360266	RGS2,DUSP1,EGR1,KLF2,RHOB,FOS,JUN
GO:0065009	regulation of molecular function	19	3322	0.38	0.0021	9606.ENSP00000215631,9606.ENSP00000230990,9606.ENSP00000231948,9606.ENSP00000235382,9606.ENSP00000239223,9606.ENSP00000239938,9606.ENSP00000270162,9606.ENSP00000279488,9606.ENSP00000306245,9606.ENSP00000312150,9606.ENSP00000347170,9606.ENSP00000356954,9606.ENSP00000358596,9606.ENSP00000360266,9606.ENSP00000365280,9606.ENSP00000391826,9606.ENSP00000398736,9606.ENSP00000428982,9606.ENSP00000469647	GADD45B,HBEGF,CRBN,RGS2,DUSP1,EGR1,SIK1,DUSP6,FOS,TRIB1,NEIL1,CTGF,DUSP5,JUN,ID1,IGF2,CYR61,CCNC,ZFP36
GO:0043405	regulation of MAP kinase activity	6	337	0.87	0.0026	9606.ENSP00000215631,9606.ENSP00000235382,9606.ENSP00000239223,9606.ENSP00000279488,9606.ENSP00000312150,9606.ENSP00000358596	GADD45B,RGS2,DUSP1,DUSP6,TRIB1,DUSP5
GO:0051239	regulation of multicellular organismal process	17	2788	0.4	0.0026	9606.ENSP00000230990,9606.ENSP00000235382,9606.ENSP00000239938,9606.ENSP00000242480,9606.ENSP00000248071,9606.ENSP00000272233,9606.ENSP00000279488,9606.ENSP00000306245,9606.ENSP00000312150,9606.ENSP00000356954,9606.ENSP00000358501,9606.ENSP00000360266,9606.ENSP00000365280,9606.ENSP00000391826,9606.ENSP00000398736,9606.ENSP00000469647,9606.ENSP00000484841	HBEGF,RGS2,EGR1,EGR2,KLF2,RHOB,DUSP6,FOS,TRIB1,CTGF,CD58,JUN,ID1,IGF2,CYR61,ZFP36,HIST1H3B
GO:0032270	positive regulation of cellular protein metabolic process	12	1496	0.52	0.0027	9606.ENSP00000215631,9606.ENSP00000230990,9606.ENSP00000239938,9606.ENSP00000279488,9606.ENSP00000312150,9606.ENSP00000330074,9606.ENSP00000356954,9606.ENSP00000358596,9606.ENSP00000360266,9606.ENSP00000391826,9606.ENSP00000398736,9606.ENSP00000428982	GADD45B,HBEGF,EGR1,DUSP6,TRIB1,HIST1H1B,CTGF,DUSP5,JUN,IGF2,CYR61,CCNC
GO:0042542	response to hydrogen peroxide	4	112	1.17	0.0027	9606.ENSP00000239223,9606.ENSP00000248071,9606.ENSP00000272233,9606.ENSP00000360266	DUSP1,KLF2,RHOB,JUN
GO:0051248	negative regulation of protein metabolic process	10	1075	0.59	0.0031	9606.ENSP00000215631,9606.ENSP00000230990,9606.ENSP00000235382,9606.ENSP00000239223,9606.ENSP00000279488,9606.ENSP00000290551,9606.ENSP00000312150,9606.ENSP00000358596,9606.ENSP00000360266,9606.ENSP00000469647	GADD45B,HBEGF,RGS2,DUSP1,DUSP6,BTG2,TRIB1,DUSP5,JUN,ZFP36
GO:0045860	positive regulation of protein kinase activity	7	517	0.75	0.0035	9606.ENSP00000215631,9606.ENSP00000239938,9606.ENSP00000279488,9606.ENSP00000358596,9606.ENSP00000391826,9606.ENSP00000398736,9606.ENSP00000428982	GADD45B,EGR1,DUSP6,DUSP5,IGF2,CYR61,CCNC
GO:0034614	cellular response to reactive oxygen species	4	124	1.13	0.0037	9606.ENSP00000248071,9606.ENSP00000272233,9606.ENSP00000306245,9606.ENSP00000360266	KLF2,RHOB,FOS,JUN
GO:0043412	macromolecule modification	18	3197	0.37	0.0038	9606.ENSP00000230990,9606.ENSP00000231948,9606.ENSP00000239223,9606.ENSP00000242480,9606.ENSP00000244534,9606.ENSP00000270162,9606.ENSP00000279488,9606.ENSP00000290551,9606.ENSP00000306245,9606.ENSP00000312150,9606.ENSP00000316948,9606.ENSP00000347170,9606.ENSP00000358596,9606.ENSP00000398736,9606.ENSP00000400513,9606.ENSP00000428982,9606.ENSP00000469647,9606.ENSP00000484710	HBEGF,CRBN,DUSP1,EGR2,HIST1H1D,SIK1,DUSP6,BTG2,FOS,TRIB1,CLK4,NEIL1,DUSP5,CYR61,FASTKD1,CCNC,ZFP36,C17orf96
GO:0006979	response to oxidative stress	6	373	0.83	0.004	9606.ENSP00000239223,9606.ENSP00000248071,9606.ENSP00000272233,9606.ENSP00000306245,9606.ENSP00000347170,9606.ENSP00000360266	DUSP1,KLF2,RHOB,FOS,NEIL1,JUN
GO:0051592	response to calcium ion	4	129	1.11	0.0041	9606.ENSP00000239223,9606.ENSP00000245919,9606.ENSP00000306245,9606.ENSP00000360266	DUSP1,FOSB,FOS,JUN
GO:0002763	positive regulation of myeloid leukocyte differentiation	3	52	1.38	0.0044	9606.ENSP00000306245,9606.ENSP00000312150,9606.ENSP00000360266	FOS,TRIB1,JUN
GO:0006468	protein phosphorylation	9	923	0.61	0.0044	9606.ENSP00000230990,9606.ENSP00000270162,9606.ENSP00000279488,9606.ENSP00000312150,9606.ENSP00000316948,9606.ENSP00000358596,9606.ENSP00000400513,9606.ENSP00000428982,9606.ENSP00000469647	HBEGF,SIK1,DUSP6,TRIB1,CLK4,DUSP5,FASTKD1,CCNC,ZFP36
GO:0070887	cellular response to chemical stimulus	16	2672	0.4	0.0046	9606.ENSP00000230990,9606.ENSP00000239223,9606.ENSP00000239938,9606.ENSP00000242480,9606.ENSP00000245919,9606.ENSP00000248071,9606.ENSP00000270162,9606.ENSP00000272233,9606.ENSP00000306245,9606.ENSP00000356954,9606.ENSP00000358501,9606.ENSP00000360266,9606.ENSP00000365280,9606.ENSP00000391826,9606.ENSP00000469647,9606.ENSP00000484841	HBEGF,DUSP1,EGR1,EGR2,FOSB,KLF2,SIK1,RHOB,FOS,CTGF,CD58,JUN,ID1,IGF2,ZFP36,HIST1H3B
GO:0045637	regulation of myeloid cell differentiation	5	249	0.92	0.0047	9606.ENSP00000306245,9606.ENSP00000312150,9606.ENSP00000360266,9606.ENSP00000469647,9606.ENSP00000484841	FOS,TRIB1,JUN,ZFP36,HIST1H3B
GO:0048511	rhythmic process	5	250	0.92	0.0047	9606.ENSP00000239938,9606.ENSP00000242480,9606.ENSP00000270162,9606.ENSP00000360266,9606.ENSP00000365280	EGR1,EGR2,SIK1,JUN,ID1
GO:0006334	nucleosome assembly	4	137	1.08	0.0048	9606.ENSP00000244534,9606.ENSP00000330074,9606.ENSP00000379911,9606.ENSP00000484841	HIST1H1D,HIST1H1B,CENPK,HIST1H3B
GO:0009891	positive regulation of biosynthetic process	13	1876	0.46	0.0048	9606.ENSP00000238647,9606.ENSP00000239938,9606.ENSP00000242480,9606.ENSP00000245919,9606.ENSP00000248071,9606.ENSP00000306245,9606.ENSP00000356954,9606.ENSP00000360266,9606.ENSP00000391826,9606.ENSP00000398736,9606.ENSP00000419923,9606.ENSP00000428982,9606.ENSP00000465617	IRF2BPL,EGR1,EGR2,FOSB,KLF2,FOS,CTGF,JUN,IGF2,CYR61,KLF6,CCNC,IER2
GO:0040029	regulation of gene expression, epigenetic	5	251	0.92	0.0048	9606.ENSP00000248071,9606.ENSP00000332194,9606.ENSP00000391826,9606.ENSP00000469647,9606.ENSP00000484841	KLF2,HIST2H2AC,IGF2,ZFP36,HIST1H3B
GO:0050793	regulation of developmental process	15	2416	0.41	0.0048	9606.ENSP00000235382,9606.ENSP00000239938,9606.ENSP00000248071,9606.ENSP00000270162,9606.ENSP00000272233,9606.ENSP00000279488,9606.ENSP00000306245,9606.ENSP00000312150,9606.ENSP00000356954,9606.ENSP00000360266,9606.ENSP00000365280,9606.ENSP00000391826,9606.ENSP00000398736,9606.ENSP00000469647,9606.ENSP00000484841	RGS2,EGR1,KLF2,SIK1,RHOB,DUSP6,FOS,TRIB1,CTGF,JUN,ID1,IGF2,CYR61,ZFP36,HIST1H3B
GO:0051384	response to glucocorticoid	4	138	1.08	0.0048	9606.ENSP00000239223,9606.ENSP00000245919,9606.ENSP00000306245,9606.ENSP00000469647	DUSP1,FOSB,FOS,ZFP36
GO:2000026	regulation of multicellular organismal development	13	1876	0.46	0.0048	9606.ENSP00000235382,9606.ENSP00000239938,9606.ENSP00000248071,9606.ENSP00000272233,9606.ENSP00000279488,9606.ENSP00000306245,9606.ENSP00000312150,9606.ENSP00000356954,9606.ENSP00000360266,9606.ENSP00000365280,9606.ENSP00000398736,9606.ENSP00000469647,9606.ENSP00000484841	RGS2,EGR1,KLF2,RHOB,DUSP6,FOS,TRIB1,CTGF,JUN,ID1,CYR61,ZFP36,HIST1H3B
GO:0060213	positive regulation of nuclear-transcribed mRNA poly(A) tail shortening	2	11	1.88	0.0054	9606.ENSP00000290551,9606.ENSP00000469647	BTG2,ZFP36
GO:0060452	positive regulation of cardiac muscle contraction	2	11	1.88	0.0054	9606.ENSP00000235382,9606.ENSP00000356954	RGS2,CTGF
GO:0032870	cellular response to hormone stimulus	7	585	0.7	0.0059	9606.ENSP00000239223,9606.ENSP00000245919,9606.ENSP00000270162,9606.ENSP00000306245,9606.ENSP00000360266,9606.ENSP00000391826,9606.ENSP00000469647	DUSP1,FOSB,SIK1,FOS,JUN,IGF2,ZFP36
GO:0014706	striated muscle tissue development	5	271	0.89	0.0061	9606.ENSP00000239938,9606.ENSP00000242480,9606.ENSP00000270162,9606.ENSP00000290551,9606.ENSP00000306245	EGR1,EGR2,SIK1,BTG2,FOS
GO:0009314	response to radiation	6	425	0.77	0.0063	9606.ENSP00000239223,9606.ENSP00000239938,9606.ENSP00000270162,9606.ENSP00000272233,9606.ENSP00000306245,9606.ENSP00000360266	DUSP1,EGR1,SIK1,RHOB,FOS,JUN
GO:0045595	regulation of cell differentiation	12	1695	0.47	0.0063	9606.ENSP00000235382,9606.ENSP00000270162,9606.ENSP00000279488,9606.ENSP00000306245,9606.ENSP00000312150,9606.ENSP00000356954,9606.ENSP00000360266,9606.ENSP00000365280,9606.ENSP00000391826,9606.ENSP00000398736,9606.ENSP00000469647,9606.ENSP00000484841	RGS2,SIK1,DUSP6,FOS,TRIB1,CTGF,JUN,ID1,IGF2,CYR61,ZFP36,HIST1H3B
GO:0070372	regulation of ERK1 and ERK2 cascade	5	274	0.88	0.0063	9606.ENSP00000239223,9606.ENSP00000279488,9606.ENSP00000356954,9606.ENSP00000360266,9606.ENSP00000398736	DUSP1,DUSP6,CTGF,JUN,CYR61
GO:0071310	cellular response to organic substance	14	2219	0.42	0.0063	9606.ENSP00000239223,9606.ENSP00000239938,9606.ENSP00000242480,9606.ENSP00000245919,9606.ENSP00000248071,9606.ENSP00000270162,9606.ENSP00000306245,9606.ENSP00000356954,9606.ENSP00000358501,9606.ENSP00000360266,9606.ENSP00000365280,9606.ENSP00000391826,9606.ENSP00000469647,9606.ENSP00000484841	DUSP1,EGR1,EGR2,FOSB,KLF2,SIK1,FOS,CTGF,CD58,JUN,ID1,IGF2,ZFP36,HIST1H3B
GO:0071277	cellular response to calcium ion	3	65	1.28	0.0067	9606.ENSP00000245919,9606.ENSP00000306245,9606.ENSP00000360266	FOSB,FOS,JUN
GO:0050790	regulation of catalytic activity	14	2249	0.41	0.0069	9606.ENSP00000215631,9606.ENSP00000235382,9606.ENSP00000239223,9606.ENSP00000239938,9606.ENSP00000279488,9606.ENSP00000312150,9606.ENSP00000347170,9606.ENSP00000356954,9606.ENSP00000358596,9606.ENSP00000360266,9606.ENSP00000391826,9606.ENSP00000398736,9606.ENSP00000428982,9606.ENSP00000469647	GADD45B,RGS2,DUSP1,EGR1,DUSP6,TRIB1,NEIL1,CTGF,DUSP5,JUN,IGF2,CYR61,CCNC,ZFP36
GO:0032269	negative regulation of cellular protein metabolic process	9	1014	0.57	0.007	9606.ENSP00000215631,9606.ENSP00000235382,9606.ENSP00000239223,9606.ENSP00000279488,9606.ENSP00000290551,9606.ENSP00000312150,9606.ENSP00000358596,9606.ENSP00000360266,9606.ENSP00000469647	GADD45B,RGS2,DUSP1,DUSP6,BTG2,TRIB1,DUSP5,JUN,ZFP36
GO:0043618	regulation of transcription from RNA polymerase II promoter in response to stress	3	67	1.27	0.007	9606.ENSP00000239938,9606.ENSP00000248071,9606.ENSP00000360266	EGR1,KLF2,JUN
GO:0007517	muscle organ development	5	287	0.86	0.0072	9606.ENSP00000230990,9606.ENSP00000239938,9606.ENSP00000242480,9606.ENSP00000290551,9606.ENSP00000306245	HBEGF,EGR1,EGR2,BTG2,FOS
GO:0043086	negative regulation of catalytic activity	8	809	0.61	0.0072	9606.ENSP00000215631,9606.ENSP00000235382,9606.ENSP00000239223,9606.ENSP00000279488,9606.ENSP00000312150,9606.ENSP00000347170,9606.ENSP00000358596,9606.ENSP00000469647	GADD45B,RGS2,DUSP1,DUSP6,TRIB1,NEIL1,DUSP5,ZFP36
GO:0030154	cell differentiation	18	3457	0.34	0.0074	9606.ENSP00000215631,9606.ENSP00000235382,9606.ENSP00000239938,9606.ENSP00000242480,9606.ENSP00000248071,9606.ENSP00000270162,9606.ENSP00000272233,9606.ENSP00000279488,9606.ENSP00000290551,9606.ENSP00000306245,9606.ENSP00000356954,9606.ENSP00000360266,9606.ENSP00000365280,9606.ENSP00000391826,9606.ENSP00000398736,9606.ENSP00000419923,9606.ENSP00000465617,9606.ENSP00000484710	GADD45B,RGS2,EGR1,EGR2,KLF2,SIK1,RHOB,DUSP6,BTG2,FOS,CTGF,JUN,ID1,IGF2,CYR61,KLF6,IER2,C17orf96
GO:0006351	transcription, DNA-templated	15	2569	0.39	0.0077	9606.ENSP00000239938,9606.ENSP00000242480,9606.ENSP00000245919,9606.ENSP00000248071,9606.ENSP00000290551,9606.ENSP00000306245,9606.ENSP00000319053,9606.ENSP00000350576,9606.ENSP00000356954,9606.ENSP00000360266,9606.ENSP00000365280,9606.ENSP00000370984,9606.ENSP00000419923,9606.ENSP00000428982,9606.ENSP00000465617	EGR1,EGR2,FOSB,KLF2,BTG2,FOS,ZNF77,ZNF441,CTGF,JUN,ID1,COMMD8,KLF6,CCNC,IER2
GO:0001525	angiogenesis	5	297	0.85	0.0078	9606.ENSP00000272233,9606.ENSP00000356954,9606.ENSP00000360266,9606.ENSP00000365280,9606.ENSP00000398736	RHOB,CTGF,JUN,ID1,CYR61
GO:0048646	anatomical structure formation involved in morphogenesis	8	831	0.6	0.008	9606.ENSP00000239223,9606.ENSP00000242480,9606.ENSP00000272233,9606.ENSP00000356954,9606.ENSP00000358596,9606.ENSP00000360266,9606.ENSP00000365280,9606.ENSP00000398736	DUSP1,EGR2,RHOB,CTGF,DUSP5,JUN,ID1,CYR61
GO:0009628	response to abiotic stimulus	9	1052	0.55	0.0083	9606.ENSP00000239223,9606.ENSP00000239938,9606.ENSP00000245919,9606.ENSP00000270162,9606.ENSP00000272233,9606.ENSP00000290551,9606.ENSP00000306245,9606.ENSP00000356954,9606.ENSP00000360266	DUSP1,EGR1,FOSB,SIK1,RHOB,BTG2,FOS,CTGF,JUN
GO:0001568	blood vessel development	6	464	0.73	0.0084	9606.ENSP00000239938,9606.ENSP00000272233,9606.ENSP00000356954,9606.ENSP00000360266,9606.ENSP00000365280,9606.ENSP00000398736	EGR1,RHOB,CTGF,JUN,ID1,CYR61
GO:0035556	intracellular signal transduction	11	1528	0.48	0.0084	9606.ENSP00000230990,9606.ENSP00000239223,9606.ENSP00000270162,9606.ENSP00000272233,9606.ENSP00000279488,9606.ENSP00000290551,9606.ENSP00000312150,9606.ENSP00000356954,9606.ENSP00000358596,9606.ENSP00000360266,9606.ENSP00000469647	HBEGF,DUSP1,SIK1,RHOB,DUSP6,BTG2,TRIB1,CTGF,DUSP5,JUN,ZFP36
GO:0035970	peptidyl-threonine dephosphorylation	2	16	1.72	0.0084	9606.ENSP00000239223,9606.ENSP00000358596	DUSP1,DUSP5
GO:0051094	positive regulation of developmental process	10	1286	0.51	0.0084	9606.ENSP00000235382,9606.ENSP00000239938,9606.ENSP00000272233,9606.ENSP00000306245,9606.ENSP00000312150,9606.ENSP00000356954,9606.ENSP00000360266,9606.ENSP00000391826,9606.ENSP00000398736,9606.ENSP00000469647	RGS2,EGR1,RHOB,FOS,TRIB1,CTGF,JUN,IGF2,CYR61,ZFP36
GO:0051240	positive regulation of multicellular organismal process	11	1551	0.47	0.0091	9606.ENSP00000230990,9606.ENSP00000235382,9606.ENSP00000239938,9606.ENSP00000272233,9606.ENSP00000306245,9606.ENSP00000312150,9606.ENSP00000356954,9606.ENSP00000358501,9606.ENSP00000360266,9606.ENSP00000391826,9606.ENSP00000398736	HBEGF,RGS2,EGR1,RHOB,FOS,TRIB1,CTGF,CD58,JUN,IGF2,CYR61
GO:0071363	cellular response to growth factor stimulus	6	477	0.72	0.0095	9606.ENSP00000239938,9606.ENSP00000306245,9606.ENSP00000356954,9606.ENSP00000360266,9606.ENSP00000365280,9606.ENSP00000469647	EGR1,FOS,CTGF,JUN,ID1,ZFP36
GO:0040008	regulation of growth	7	663	0.64	0.0096	9606.ENSP00000230990,9606.ENSP00000235382,9606.ENSP00000279488,9606.ENSP00000330074,9606.ENSP00000356954,9606.ENSP00000391826,9606.ENSP00000398736	HBEGF,RGS2,DUSP6,HIST1H1B,CTGF,IGF2,CYR61
GO:0006950	response to stress	17	3267	0.34	0.0098	9606.ENSP00000215631,9606.ENSP00000230990,9606.ENSP00000239223,9606.ENSP00000239938,9606.ENSP00000248071,9606.ENSP00000272233,9606.ENSP00000279488,9606.ENSP00000290551,9606.ENSP00000306245,9606.ENSP00000312150,9606.ENSP00000347170,9606.ENSP00000356954,9606.ENSP00000358501,9606.ENSP00000360266,9606.ENSP00000398736,9606.ENSP00000469647,9606.ENSP00000484841	GADD45B,HBEGF,DUSP1,EGR1,KLF2,RHOB,DUSP6,BTG2,FOS,TRIB1,NEIL1,CTGF,CD58,JUN,CYR61,ZFP36,HIST1H3B
GO:0035994	response to muscle stretch	2	18	1.67	0.0098	9606.ENSP00000306245,9606.ENSP00000360266	FOS,JUN
GO:0051412	response to corticosterone	2	18	1.67	0.0098	9606.ENSP00000245919,9606.ENSP00000306245	FOSB,FOS
GO:1901654	response to ketone	4	183	0.96	0.0098	9606.ENSP00000239223,9606.ENSP00000245919,9606.ENSP00000248071,9606.ENSP00000306245	DUSP1,FOSB,KLF2,FOS
GO:0000165	MAPK cascade	5	323	0.81	0.0102	9606.ENSP00000230990,9606.ENSP00000279488,9606.ENSP00000312150,9606.ENSP00000358596,9606.ENSP00000469647	HBEGF,DUSP6,TRIB1,DUSP5,ZFP36
GO:0006807	nitrogen compound metabolic process	31	8349	0.19	0.0102	9606.ENSP00000230990,9606.ENSP00000231948,9606.ENSP00000239223,9606.ENSP00000239938,9606.ENSP00000242480,9606.ENSP00000244534,9606.ENSP00000245919,9606.ENSP00000248071,9606.ENSP00000270162,9606.ENSP00000279488,9606.ENSP00000290551,9606.ENSP00000306245,9606.ENSP00000312150,9606.ENSP00000316948,9606.ENSP00000319053,9606.ENSP00000347170,9606.ENSP00000350576,9606.ENSP00000356954,9606.ENSP00000358596,…	HBEGF,CRBN,DUSP1,EGR1,EGR2,HIST1H1D,FOSB,KLF2,SIK1,DUSP6,BTG2,FOS,TRIB1,CLK4,ZNF77,NEIL1,ZNF441,CTGF,DUSP5,JUN,ID1,COMMD8,IGF2,CYR61,FASTKD1,KLF6,CCNC,IER2,ZFP36,C17orf96,HIST1H3B
GO:0044267	cellular protein metabolic process	18	3603	0.32	0.0102	9606.ENSP00000230990,9606.ENSP00000231948,9606.ENSP00000239223,9606.ENSP00000242480,9606.ENSP00000244534,9606.ENSP00000270162,9606.ENSP00000279488,9606.ENSP00000290551,9606.ENSP00000312150,9606.ENSP00000316948,9606.ENSP00000358596,9606.ENSP00000391826,9606.ENSP00000398736,9606.ENSP00000400513,9606.ENSP00000428982,9606.ENSP00000469647,9606.ENSP00000484710,9606.ENSP00000484841	HBEGF,CRBN,DUSP1,EGR2,HIST1H1D,SIK1,DUSP6,BTG2,TRIB1,CLK4,DUSP5,IGF2,CYR61,FASTKD1,CCNC,ZFP36,C17orf96,HIST1H3B
GO:0010035	response to inorganic substance	6	491	0.71	0.0103	9606.ENSP00000239223,9606.ENSP00000245919,9606.ENSP00000248071,9606.ENSP00000272233,9606.ENSP00000306245,9606.ENSP00000360266	DUSP1,FOSB,KLF2,RHOB,FOS,JUN
GO:0007178	transmembrane receptor protein serine/threonine kinase signaling pathway	4	189	0.95	0.0104	9606.ENSP00000239938,9606.ENSP00000306245,9606.ENSP00000360266,9606.ENSP00000365280	EGR1,FOS,JUN,ID1
GO:0042127	regulation of cell population proliferation	11	1594	0.46	0.0105	9606.ENSP00000230990,9606.ENSP00000239223,9606.ENSP00000239938,9606.ENSP00000290551,9606.ENSP00000312150,9606.ENSP00000356954,9606.ENSP00000360266,9606.ENSP00000365280,9606.ENSP00000391826,9606.ENSP00000398736,9606.ENSP00000469647	HBEGF,DUSP1,EGR1,BTG2,TRIB1,CTGF,JUN,ID1,IGF2,CYR61,ZFP36
GO:0006464	cellular protein modification process	16	2999	0.35	0.0106	9606.ENSP00000230990,9606.ENSP00000231948,9606.ENSP00000239223,9606.ENSP00000242480,9606.ENSP00000244534,9606.ENSP00000270162,9606.ENSP00000279488,9606.ENSP00000290551,9606.ENSP00000312150,9606.ENSP00000316948,9606.ENSP00000358596,9606.ENSP00000398736,9606.ENSP00000400513,9606.ENSP00000428982,9606.ENSP00000469647,9606.ENSP00000484710	HBEGF,CRBN,DUSP1,EGR2,HIST1H1D,SIK1,DUSP6,BTG2,TRIB1,CLK4,DUSP5,CYR61,FASTKD1,CCNC,ZFP36,C17orf96
GO:1901216	positive regulation of neuron death	3	85	1.17	0.0107	9606.ENSP00000239938,9606.ENSP00000306245,9606.ENSP00000360266	EGR1,FOS,JUN
GO:1901701	cellular response to oxygen-containing compound	8	896	0.57	0.0109	9606.ENSP00000239938,9606.ENSP00000248071,9606.ENSP00000272233,9606.ENSP00000306245,9606.ENSP00000360266,9606.ENSP00000365280,9606.ENSP00000391826,9606.ENSP00000469647	EGR1,KLF2,RHOB,FOS,JUN,ID1,IGF2,ZFP36
GO:0007167	enzyme linked receptor protein signaling pathway	7	698	0.62	0.0115	9606.ENSP00000230990,9606.ENSP00000239938,9606.ENSP00000306245,9606.ENSP00000356954,9606.ENSP00000360266,9606.ENSP00000365280,9606.ENSP00000391826	HBEGF,EGR1,FOS,CTGF,JUN,ID1,IGF2
GO:0007179	transforming growth factor beta receptor signaling pathway	3	88	1.15	0.0115	9606.ENSP00000306245,9606.ENSP00000360266,9606.ENSP00000365280	FOS,JUN,ID1
GO:0034654	nucleobase-containing compound biosynthetic process	16	3031	0.34	0.0115	9606.ENSP00000239938,9606.ENSP00000242480,9606.ENSP00000245919,9606.ENSP00000248071,9606.ENSP00000290551,9606.ENSP00000306245,9606.ENSP00000319053,9606.ENSP00000347170,9606.ENSP00000350576,9606.ENSP00000356954,9606.ENSP00000360266,9606.ENSP00000365280,9606.ENSP00000370984,9606.ENSP00000419923,9606.ENSP00000428982,9606.ENSP00000465617	EGR1,EGR2,FOSB,KLF2,BTG2,FOS,ZNF77,NEIL1,ZNF441,CTGF,JUN,ID1,COMMD8,KLF6,CCNC,IER2
GO:0051726	regulation of cell cycle	9	1129	0.52	0.0115	9606.ENSP00000215631,9606.ENSP00000239223,9606.ENSP00000270162,9606.ENSP00000272233,9606.ENSP00000290551,9606.ENSP00000356954,9606.ENSP00000360266,9606.ENSP00000391826,9606.ENSP00000428982	GADD45B,DUSP1,SIK1,RHOB,BTG2,CTGF,JUN,IGF2,CCNC
GO:0071902	positive regulation of protein serine/threonine kinase activity	5	340	0.79	0.0115	9606.ENSP00000215631,9606.ENSP00000279488,9606.ENSP00000358596,9606.ENSP00000391826,9606.ENSP00000428982	GADD45B,DUSP6,DUSP5,IGF2,CCNC
GO:0043410	positive regulation of MAPK cascade	6	512	0.69	0.0118	9606.ENSP00000215631,9606.ENSP00000279488,9606.ENSP00000356954,9606.ENSP00000358596,9606.ENSP00000360266,9606.ENSP00000391826	GADD45B,DUSP6,CTGF,DUSP5,JUN,IGF2
GO:0043085	positive regulation of catalytic activity	10	1381	0.48	0.0119	9606.ENSP00000215631,9606.ENSP00000235382,9606.ENSP00000239938,9606.ENSP00000279488,9606.ENSP00000356954,9606.ENSP00000358596,9606.ENSP00000360266,9606.ENSP00000391826,9606.ENSP00000398736,9606.ENSP00000428982	GADD45B,RGS2,EGR1,DUSP6,CTGF,DUSP5,JUN,IGF2,CYR61,CCNC
GO:0043496	regulation of protein homodimerization activity	2	22	1.58	0.0124	9606.ENSP00000231948,9606.ENSP00000365280	CRBN,ID1
GO:0032502	developmental process	23	5401	0.25	0.0126	9606.ENSP00000215631,9606.ENSP00000230990,9606.ENSP00000235382,9606.ENSP00000238647,9606.ENSP00000239223,9606.ENSP00000239938,9606.ENSP00000242480,9606.ENSP00000248071,9606.ENSP00000259874,9606.ENSP00000270162,9606.ENSP00000272233,9606.ENSP00000279488,9606.ENSP00000290551,9606.ENSP00000306245,9606.ENSP00000356954,9606.ENSP00000358596,9606.ENSP00000360266,9606.ENSP00000365280,9606.ENSP00000391826,…	GADD45B,HBEGF,RGS2,IRF2BPL,DUSP1,EGR1,EGR2,KLF2,IER3,SIK1,RHOB,DUSP6,BTG2,FOS,CTGF,DUSP5,JUN,ID1,IGF2,CYR61,KLF6,IER2,C17orf96
GO:0007275	multicellular organism development	21	4726	0.27	0.0135	9606.ENSP00000215631,9606.ENSP00000230990,9606.ENSP00000235382,9606.ENSP00000239223,9606.ENSP00000239938,9606.ENSP00000242480,9606.ENSP00000248071,9606.ENSP00000270162,9606.ENSP00000272233,9606.ENSP00000279488,9606.ENSP00000290551,9606.ENSP00000306245,9606.ENSP00000356954,9606.ENSP00000358596,9606.ENSP00000360266,9606.ENSP00000365280,9606.ENSP00000391826,9606.ENSP00000398736,9606.ENSP00000419923,…	GADD45B,HBEGF,RGS2,DUSP1,EGR1,EGR2,KLF2,SIK1,RHOB,DUSP6,BTG2,FOS,CTGF,DUSP5,JUN,ID1,IGF2,CYR61,KLF6,IER2,C17orf96
GO:0009612	response to mechanical stimulus	4	210	0.9	0.0137	9606.ENSP00000245919,9606.ENSP00000290551,9606.ENSP00000306245,9606.ENSP00000360266	FOSB,BTG2,FOS,JUN
GO:0048856	anatomical structure development	22	5085	0.26	0.0137	9606.ENSP00000215631,9606.ENSP00000230990,9606.ENSP00000235382,9606.ENSP00000239223,9606.ENSP00000239938,9606.ENSP00000242480,9606.ENSP00000248071,9606.ENSP00000259874,9606.ENSP00000270162,9606.ENSP00000272233,9606.ENSP00000279488,9606.ENSP00000290551,9606.ENSP00000306245,9606.ENSP00000356954,9606.ENSP00000358596,9606.ENSP00000360266,9606.ENSP00000365280,9606.ENSP00000391826,9606.ENSP00000398736,…	GADD45B,HBEGF,RGS2,DUSP1,EGR1,EGR2,KLF2,IER3,SIK1,RHOB,DUSP6,BTG2,FOS,CTGF,DUSP5,JUN,ID1,IGF2,CYR61,KLF6,IER2,C17orf96
GO:0032897	negative regulation of viral transcription	2	24	1.54	0.014	9606.ENSP00000360266,9606.ENSP00000469647	JUN,ZFP36
GO:0043434	response to peptide hormone	5	362	0.76	0.014	9606.ENSP00000239938,9606.ENSP00000242480,9606.ENSP00000290551,9606.ENSP00000356954,9606.ENSP00000391826	EGR1,EGR2,BTG2,CTGF,IGF2
GO:0044319	wound healing, spreading of cells	2	24	1.54	0.014	9606.ENSP00000230990,9606.ENSP00000398736	HBEGF,CYR61
GO:0060669	embryonic placenta morphogenesis	2	24	1.54	0.014	9606.ENSP00000391826,9606.ENSP00000398736	IGF2,CYR61
GO:0016070	RNA metabolic process	17	3430	0.31	0.0141	9606.ENSP00000239938,9606.ENSP00000242480,9606.ENSP00000245919,9606.ENSP00000248071,9606.ENSP00000290551,9606.ENSP00000306245,9606.ENSP00000319053,9606.ENSP00000350576,9606.ENSP00000356954,9606.ENSP00000360266,9606.ENSP00000365280,9606.ENSP00000370984,9606.ENSP00000400513,9606.ENSP00000419923,9606.ENSP00000428982,9606.ENSP00000465617,9606.ENSP00000469647	EGR1,EGR2,FOSB,KLF2,BTG2,FOS,ZNF77,ZNF441,CTGF,JUN,ID1,COMMD8,FASTKD1,KLF6,CCNC,IER2,ZFP36
GO:1902895	positive regulation of pri-miRNA transcription by RNA polymerase II	2	25	1.52	0.0147	9606.ENSP00000306245,9606.ENSP00000360266	FOS,JUN
GO:0035335	peptidyl-tyrosine dephosphorylation	3	100	1.1	0.0148	9606.ENSP00000239223,9606.ENSP00000279488,9606.ENSP00000358596	DUSP1,DUSP6,DUSP5
GO:0009611	response to wounding	6	547	0.66	0.015	9606.ENSP00000230990,9606.ENSP00000356954,9606.ENSP00000360266,9606.ENSP00000398736,9606.ENSP00000469647,9606.ENSP00000484841	HBEGF,CTGF,JUN,CYR61,ZFP36,HIST1H3B
GO:0044093	positive regulation of molecular function	11	1713	0.43	0.0159	9606.ENSP00000215631,9606.ENSP00000231948,9606.ENSP00000235382,9606.ENSP00000239938,9606.ENSP00000279488,9606.ENSP00000356954,9606.ENSP00000358596,9606.ENSP00000360266,9606.ENSP00000391826,9606.ENSP00000398736,9606.ENSP00000428982	GADD45B,CRBN,RGS2,EGR1,DUSP6,CTGF,DUSP5,JUN,IGF2,CYR61,CCNC
GO:0009653	anatomical structure morphogenesis	12	1992	0.4	0.0163	9606.ENSP00000230990,9606.ENSP00000239223,9606.ENSP00000242480,9606.ENSP00000248071,9606.ENSP00000259874,9606.ENSP00000272233,9606.ENSP00000356954,9606.ENSP00000358596,9606.ENSP00000360266,9606.ENSP00000365280,9606.ENSP00000391826,9606.ENSP00000398736	HBEGF,DUSP1,EGR2,KLF2,IER3,RHOB,CTGF,DUSP5,JUN,ID1,IGF2,CYR61
GO:0097305	response to alcohol	4	233	0.85	0.0183	9606.ENSP00000235382,9606.ENSP00000245919,9606.ENSP00000248071,9606.ENSP00000306245	RGS2,FOSB,KLF2,FOS
GO:0007611	learning or memory	4	237	0.85	0.0193	9606.ENSP00000242480,9606.ENSP00000290551,9606.ENSP00000306245,9606.ENSP00000360266	EGR2,BTG2,FOS,JUN
GO:0071236	cellular response to antibiotic	3	112	1.05	0.0193	9606.ENSP00000239938,9606.ENSP00000248071,9606.ENSP00000272233	EGR1,KLF2,RHOB
GO:0001558	regulation of cell growth	5	402	0.71	0.0205	9606.ENSP00000230990,9606.ENSP00000235382,9606.ENSP00000330074,9606.ENSP00000356954,9606.ENSP00000398736	HBEGF,RGS2,HIST1H1B,CTGF,CYR61
GO:0051090	regulation of DNA-binding transcription factor activity	5	403	0.71	0.0205	9606.ENSP00000270162,9606.ENSP00000306245,9606.ENSP00000312150,9606.ENSP00000360266,9606.ENSP00000365280	SIK1,FOS,TRIB1,JUN,ID1
GO:0071276	cellular response to cadmium ion	2	31	1.43	0.0205	9606.ENSP00000306245,9606.ENSP00000360266	FOS,JUN
GO:0071774	response to fibroblast growth factor	3	115	1.04	0.0205	9606.ENSP00000356954,9606.ENSP00000465617,9606.ENSP00000469647	CTGF,IER2,ZFP36
GO:0017148	negative regulation of translation	3	117	1.03	0.0212	9606.ENSP00000235382,9606.ENSP00000290551,9606.ENSP00000469647	RGS2,BTG2,ZFP36
GO:0072359	circulatory system development	7	807	0.56	0.0216	9606.ENSP00000239938,9606.ENSP00000270162,9606.ENSP00000272233,9606.ENSP00000356954,9606.ENSP00000360266,9606.ENSP00000365280,9606.ENSP00000398736	EGR1,SIK1,RHOB,CTGF,JUN,ID1,CYR61
GO:0044238	primary metabolic process	31	8808	0.17	0.0219	9606.ENSP00000230990,9606.ENSP00000231948,9606.ENSP00000239223,9606.ENSP00000239938,9606.ENSP00000242480,9606.ENSP00000244534,9606.ENSP00000245919,9606.ENSP00000248071,9606.ENSP00000270162,9606.ENSP00000279488,9606.ENSP00000290551,9606.ENSP00000306245,9606.ENSP00000312150,9606.ENSP00000316948,9606.ENSP00000319053,9606.ENSP00000347170,9606.ENSP00000350576,9606.ENSP00000356954,9606.ENSP00000358596,…	HBEGF,CRBN,DUSP1,EGR1,EGR2,HIST1H1D,FOSB,KLF2,SIK1,DUSP6,BTG2,FOS,TRIB1,CLK4,ZNF77,NEIL1,ZNF441,CTGF,DUSP5,JUN,ID1,COMMD8,IGF2,CYR61,FASTKD1,KLF6,CCNC,IER2,ZFP36,C17orf96,HIST1H3B
GO:0090304	nucleic acid metabolic process	18	3941	0.28	0.0224	9606.ENSP00000239938,9606.ENSP00000242480,9606.ENSP00000245919,9606.ENSP00000248071,9606.ENSP00000290551,9606.ENSP00000306245,9606.ENSP00000319053,9606.ENSP00000347170,9606.ENSP00000350576,9606.ENSP00000356954,9606.ENSP00000360266,9606.ENSP00000365280,9606.ENSP00000370984,9606.ENSP00000400513,9606.ENSP00000419923,9606.ENSP00000428982,9606.ENSP00000465617,9606.ENSP00000469647	EGR1,EGR2,FOSB,KLF2,BTG2,FOS,ZNF77,NEIL1,ZNF441,CTGF,JUN,ID1,COMMD8,FASTKD1,KLF6,CCNC,IER2,ZFP36
GO:0033993	response to lipid	7	825	0.55	0.0238	9606.ENSP00000239223,9606.ENSP00000245919,9606.ENSP00000306245,9606.ENSP00000312150,9606.ENSP00000356954,9606.ENSP00000360266,9606.ENSP00000469647	DUSP1,FOSB,FOS,TRIB1,CTGF,JUN,ZFP36
GO:0010646	regulation of cell communication	16	3327	0.3	0.0245	9606.ENSP00000215631,9606.ENSP00000230990,9606.ENSP00000235382,9606.ENSP00000239223,9606.ENSP00000239938,9606.ENSP00000242480,9606.ENSP00000259874,9606.ENSP00000272233,9606.ENSP00000279488,9606.ENSP00000312150,9606.ENSP00000356954,9606.ENSP00000358596,9606.ENSP00000360266,9606.ENSP00000365280,9606.ENSP00000391826,9606.ENSP00000398736	GADD45B,HBEGF,RGS2,DUSP1,EGR1,EGR2,IER3,RHOB,DUSP6,TRIB1,CTGF,DUSP5,JUN,ID1,IGF2,CYR61
GO:0048660	regulation of smooth muscle cell proliferation	3	126	1	0.0248	9606.ENSP00000230990,9606.ENSP00000312150,9606.ENSP00000360266	HBEGF,TRIB1,JUN
GO:0032570	response to progesterone	2	36	1.36	0.0253	9606.ENSP00000245919,9606.ENSP00000306245	FOSB,FOS
GO:0009966	regulation of signal transduction	15	3033	0.31	0.0259	9606.ENSP00000215631,9606.ENSP00000230990,9606.ENSP00000235382,9606.ENSP00000239223,9606.ENSP00000239938,9606.ENSP00000259874,9606.ENSP00000272233,9606.ENSP00000279488,9606.ENSP00000312150,9606.ENSP00000356954,9606.ENSP00000358596,9606.ENSP00000360266,9606.ENSP00000365280,9606.ENSP00000391826,9606.ENSP00000398736	GADD45B,HBEGF,RGS2,DUSP1,EGR1,IER3,RHOB,DUSP6,TRIB1,CTGF,DUSP5,JUN,ID1,IGF2,CYR61
GO:0023051	regulation of signaling	16	3360	0.3	0.0266	9606.ENSP00000215631,9606.ENSP00000230990,9606.ENSP00000235382,9606.ENSP00000239223,9606.ENSP00000239938,9606.ENSP00000242480,9606.ENSP00000259874,9606.ENSP00000272233,9606.ENSP00000279488,9606.ENSP00000312150,9606.ENSP00000356954,9606.ENSP00000358596,9606.ENSP00000360266,9606.ENSP00000365280,9606.ENSP00000391826,9606.ENSP00000398736	GADD45B,HBEGF,RGS2,DUSP1,EGR1,EGR2,IER3,RHOB,DUSP6,TRIB1,CTGF,DUSP5,JUN,ID1,IGF2,CYR61
GO:0009605	response to external stimulus	12	2152	0.37	0.0276	9606.ENSP00000230990,9606.ENSP00000239938,9606.ENSP00000242480,9606.ENSP00000245919,9606.ENSP00000270162,9606.ENSP00000290551,9606.ENSP00000306245,9606.ENSP00000312150,9606.ENSP00000358501,9606.ENSP00000360266,9606.ENSP00000398736,9606.ENSP00000469647	HBEGF,EGR1,EGR2,FOSB,SIK1,BTG2,FOS,TRIB1,CD58,JUN,CYR61,ZFP36
GO:0061013	regulation of mRNA catabolic process	3	134	0.97	0.0286	9606.ENSP00000290551,9606.ENSP00000400513,9606.ENSP00000469647	BTG2,FASTKD1,ZFP36
GO:0010634	positive regulation of epithelial cell migration	3	136	0.96	0.0295	9606.ENSP00000230990,9606.ENSP00000272233,9606.ENSP00000360266	HBEGF,RHOB,JUN
GO:0007612	learning	3	137	0.96	0.0298	9606.ENSP00000290551,9606.ENSP00000306245,9606.ENSP00000360266	BTG2,FOS,JUN
GO:0071364	cellular response to epidermal growth factor stimulus	2	40	1.32	0.0298	9606.ENSP00000365280,9606.ENSP00000469647	ID1,ZFP36
GO:0008284	positive regulation of cell population proliferation	7	878	0.52	0.0311	9606.ENSP00000230990,9606.ENSP00000239938,9606.ENSP00000356954,9606.ENSP00000360266,9606.ENSP00000365280,9606.ENSP00000391826,9606.ENSP00000398736	HBEGF,EGR1,CTGF,JUN,ID1,IGF2,CYR61
GO:1901214	regulation of neuron death	4	288	0.76	0.0332	9606.ENSP00000239938,9606.ENSP00000290551,9606.ENSP00000306245,9606.ENSP00000360266	EGR1,BTG2,FOS,JUN
GO:0051147	regulation of muscle cell differentiation	3	148	0.93	0.0357	9606.ENSP00000235382,9606.ENSP00000270162,9606.ENSP00000391826	RGS2,SIK1,IGF2
GO:0006325	chromatin organization	6	683	0.56	0.0363	9606.ENSP00000244534,9606.ENSP00000330074,9606.ENSP00000332194,9606.ENSP00000379911,9606.ENSP00000484710,9606.ENSP00000484841	HIST1H1D,HIST1H1B,HIST2H2AC,CENPK,C17orf96,HIST1H3B
GO:0045597	positive regulation of cell differentiation	7	908	0.51	0.0363	9606.ENSP00000235382,9606.ENSP00000306245,9606.ENSP00000312150,9606.ENSP00000356954,9606.ENSP00000360266,9606.ENSP00000398736,9606.ENSP00000469647	RGS2,FOS,TRIB1,CTGF,JUN,CYR61,ZFP36
GO:0032496	response to lipopolysaccharide	4	298	0.75	0.0364	9606.ENSP00000306245,9606.ENSP00000312150,9606.ENSP00000360266,9606.ENSP00000469647	FOS,TRIB1,JUN,ZFP36
GO:1901342	regulation of vasculature development	4	305	0.74	0.0389	9606.ENSP00000239938,9606.ENSP00000248071,9606.ENSP00000272233,9606.ENSP00000365280	EGR1,KLF2,RHOB,ID1
GO:0006139	nucleobase-containing compound metabolic process	19	4551	0.24	0.04	9606.ENSP00000239938,9606.ENSP00000242480,9606.ENSP00000245919,9606.ENSP00000248071,9606.ENSP00000290551,9606.ENSP00000306245,9606.ENSP00000319053,9606.ENSP00000347170,9606.ENSP00000350576,9606.ENSP00000356954,9606.ENSP00000360266,9606.ENSP00000365280,9606.ENSP00000370984,9606.ENSP00000391826,9606.ENSP00000400513,9606.ENSP00000419923,9606.ENSP00000428982,9606.ENSP00000465617,9606.ENSP00000469647	EGR1,EGR2,FOSB,KLF2,BTG2,FOS,ZNF77,NEIL1,ZNF441,CTGF,JUN,ID1,COMMD8,IGF2,FASTKD1,KLF6,CCNC,IER2,ZFP36
GO:0043433	negative regulation of DNA-binding transcription factor activity	3	157	0.9	0.0402	9606.ENSP00000270162,9606.ENSP00000312150,9606.ENSP00000365280	SIK1,TRIB1,ID1
GO:0035690	cellular response to drug	4	310	0.73	0.0404	9606.ENSP00000239938,9606.ENSP00000248071,9606.ENSP00000272233,9606.ENSP00000365280	EGR1,KLF2,RHOB,ID1
GO:0030324	lung development	3	162	0.89	0.0434	9606.ENSP00000248071,9606.ENSP00000356954,9606.ENSP00000365280	KLF2,CTGF,ID1
GO:0048513	animal organ development	14	2926	0.3	0.0435	9606.ENSP00000230990,9606.ENSP00000235382,9606.ENSP00000239938,9606.ENSP00000242480,9606.ENSP00000248071,9606.ENSP00000270162,9606.ENSP00000290551,9606.ENSP00000306245,9606.ENSP00000356954,9606.ENSP00000360266,9606.ENSP00000365280,9606.ENSP00000391826,9606.ENSP00000398736,9606.ENSP00000419923	HBEGF,RGS2,EGR1,EGR2,KLF2,SIK1,BTG2,FOS,CTGF,JUN,ID1,IGF2,CYR61,KLF6
GO:0001706	endoderm formation	2	52	1.2	0.044	9606.ENSP00000239223,9606.ENSP00000358596	DUSP1,DUSP5
GO:0043392	negative regulation of DNA binding	2	52	1.2	0.044	9606.ENSP00000360266,9606.ENSP00000365280	JUN,ID1
GO:0060548	negative regulation of cell death	7	953	0.49	0.044	9606.ENSP00000239223,9606.ENSP00000259874,9606.ENSP00000290551,9606.ENSP00000356954,9606.ENSP00000360266,9606.ENSP00000365280,9606.ENSP00000398736	DUSP1,IER3,BTG2,CTGF,JUN,ID1,CYR61
GO:0001101	response to acid chemical	4	323	0.71	0.0452	9606.ENSP00000239223,9606.ENSP00000239938,9606.ENSP00000248071,9606.ENSP00000356954	DUSP1,EGR1,KLF2,CTGF
GO:1902533	positive regulation of intracellular signal transduction	7	959	0.48	0.0452	9606.ENSP00000215631,9606.ENSP00000230990,9606.ENSP00000279488,9606.ENSP00000356954,9606.ENSP00000358596,9606.ENSP00000360266,9606.ENSP00000391826	GADD45B,HBEGF,DUSP6,CTGF,DUSP5,JUN,IGF2

## Sheet: Cntrl_vs_Crypto_72h_KEGG
Supplementary table S7: Results from the Gene Ontology (GO) analysis in the category for biological process complete (GObp) and Pathway Enrichment (KEGG pathways) in Cryptosporidium parvum infected cells at 72 hpi.
#term ID	term description	observed gene count	background gene count	strength	false discovery rate	matching proteins in your network (IDs)	matching proteins in your network (labels)
hsa04010	MAPK signaling pathway	7	293	1	0.00063	9606.ENSP00000215631,9606.ENSP00000239223,9606.ENSP00000279488,9606.ENSP00000306245,9606.ENSP00000358596,9606.ENSP00000360266,9606.ENSP00000391826	GADD45B,DUSP1,DUSP6,FOS,DUSP5,JUN,IGF2
hsa05031	Amphetamine addiction	3	65	1.28	0.0148	9606.ENSP00000245919,9606.ENSP00000306245,9606.ENSP00000360266	FOSB,FOS,JUN
hsa05166	HTLV-I infection	5	250	0.92	0.0148	9606.ENSP00000239938,9606.ENSP00000242480,9606.ENSP00000306245,9606.ENSP00000360266,9606.ENSP00000469647	EGR1,EGR2,FOS,JUN,ZFP36
hsa05418	Fluid shear stress and atherosclerosis	4	133	1.1	0.0148	9606.ENSP00000239223,9606.ENSP00000248071,9606.ENSP00000306245,9606.ENSP00000360266	DUSP1,KLF2,FOS,JUN
hsa05210	Colorectal cancer	3	85	1.17	0.0226	9606.ENSP00000215631,9606.ENSP00000306245,9606.ENSP00000360266	GADD45B,FOS,JUN
hsa01522	Endocrine resistance	3	95	1.12	0.0235	9606.ENSP00000230990,9606.ENSP00000306245,9606.ENSP00000360266	HBEGF,FOS,JUN
hsa04657	IL-17 signaling pathway	3	92	1.13	0.0235	9606.ENSP00000245919,9606.ENSP00000306245,9606.ENSP00000360266	FOSB,FOS,JUN
hsa04380	Osteoclast differentiation	3	124	1	0.0402	9606.ENSP00000245919,9606.ENSP00000306245,9606.ENSP00000360266	FOSB,FOS,JUN
hsa04210	Apoptosis	3	135	0.97	0.0433	9606.ENSP00000215631,9606.ENSP00000306245,9606.ENSP00000360266	GADD45B,FOS,JUN
hsa04371	Apelin signaling pathway	3	133	0.97	0.0433	9606.ENSP00000239938,9606.ENSP00000248071,9606.ENSP00000356954	EGR1,KLF2,CTGF
hsa04915	Estrogen signaling pathway	3	133	0.97	0.0433	9606.ENSP00000230990,9606.ENSP00000306245,9606.ENSP00000360266	HBEGF,FOS,JUN
hsa04921	Oxytocin signaling pathway	3	149	0.92	0.0433	9606.ENSP00000235382,9606.ENSP00000306245,9606.ENSP00000360266	RGS2,FOS,JUN
hsa05030	Cocaine addiction	2	49	1.23	0.0433	9606.ENSP00000245919,9606.ENSP00000360266	FOSB,JUN
hsa05034	Alcoholism	3	142	0.94	0.0433	9606.ENSP00000245919,9606.ENSP00000332194,9606.ENSP00000484841	FOSB,HIST2H2AC,HIST1H3B
hsa05161	Hepatitis B	3	142	0.94	0.0433	9606.ENSP00000242480,9606.ENSP00000306245,9606.ENSP00000360266	EGR2,FOS,JUN
hsa05224	Breast cancer	3	147	0.93	0.0433	9606.ENSP00000215631,9606.ENSP00000306245,9606.ENSP00000360266	GADD45B,FOS,JUN
hsa05202	Transcriptional misregulation in cancer	3	169	0.87	0.0438	9606.ENSP00000215631,9606.ENSP00000279488,9606.ENSP00000484841	GADD45B,DUSP6,HIST1H3B

## Sheet: Cntrl_vs_Crypto_72h_Bio_Up
Supplementary table S7: Results from the Gene Ontology (GO) analysis in the category for biological process complete (GObp) and Pathway Enrichment (KEGG pathways) in Cryptosporidium parvum infected cells at 72 hpi.
#term ID	term description	observed gene count	background gene count	strength	false discovery rate	matching proteins in your network (IDs)	matching proteins in your network (labels)
GO:0010604	positive regulation of macromolecule metabolic process	20	3081	0.69	1.13e-08	9606.ENSP00000215631,9606.ENSP00000230990,9606.ENSP00000238647,9606.ENSP00000239938,9606.ENSP00000242480,9606.ENSP00000245919,9606.ENSP00000248071,9606.ENSP00000279488,9606.ENSP00000290551,9606.ENSP00000306245,9606.ENSP00000312150,9606.ENSP00000356954,9606.ENSP00000358596,9606.ENSP00000360266,9606.ENSP00000365280,9606.ENSP00000391826,9606.ENSP00000398736,9606.ENSP00000419923,9606.ENSP00000465617,…	GADD45B,HBEGF,IRF2BPL,EGR1,EGR2,FOSB,KLF2,DUSP6,BTG2,FOS,TRIB1,CTGF,DUSP5,JUN,ID1,IGF2,CYR61,KLF6,IER2,ZFP36
GO:0048522	positive regulation of cellular process	23	4898	0.55	1.23e-08	9606.ENSP00000215631,9606.ENSP00000230990,9606.ENSP00000238647,9606.ENSP00000239223,9606.ENSP00000239938,9606.ENSP00000242480,9606.ENSP00000245919,9606.ENSP00000248071,9606.ENSP00000270162,9606.ENSP00000272233,9606.ENSP00000279488,9606.ENSP00000290551,9606.ENSP00000306245,9606.ENSP00000312150,9606.ENSP00000356954,9606.ENSP00000358596,9606.ENSP00000360266,9606.ENSP00000365280,9606.ENSP00000391826,…	GADD45B,HBEGF,IRF2BPL,DUSP1,EGR1,EGR2,FOSB,KLF2,SIK1,RHOB,DUSP6,BTG2,FOS,TRIB1,CTGF,DUSP5,JUN,ID1,IGF2,CYR61,KLF6,IER2,ZFP36
GO:0051173	positive regulation of nitrogen compound metabolic process	19	2946	0.69	1.97e-08	9606.ENSP00000215631,9606.ENSP00000230990,9606.ENSP00000238647,9606.ENSP00000239938,9606.ENSP00000242480,9606.ENSP00000245919,9606.ENSP00000248071,9606.ENSP00000279488,9606.ENSP00000290551,9606.ENSP00000306245,9606.ENSP00000312150,9606.ENSP00000356954,9606.ENSP00000358596,9606.ENSP00000360266,9606.ENSP00000391826,9606.ENSP00000398736,9606.ENSP00000419923,9606.ENSP00000465617,9606.ENSP00000469647	GADD45B,HBEGF,IRF2BPL,EGR1,EGR2,FOSB,KLF2,DUSP6,BTG2,FOS,TRIB1,CTGF,DUSP5,JUN,IGF2,CYR61,KLF6,IER2,ZFP36
GO:0031325	positive regulation of cellular metabolic process	19	3060	0.67	3.09e-08	9606.ENSP00000215631,9606.ENSP00000230990,9606.ENSP00000238647,9606.ENSP00000239938,9606.ENSP00000242480,9606.ENSP00000245919,9606.ENSP00000248071,9606.ENSP00000279488,9606.ENSP00000290551,9606.ENSP00000306245,9606.ENSP00000312150,9606.ENSP00000356954,9606.ENSP00000358596,9606.ENSP00000360266,9606.ENSP00000391826,9606.ENSP00000398736,9606.ENSP00000419923,9606.ENSP00000465617,9606.ENSP00000469647	GADD45B,HBEGF,IRF2BPL,EGR1,EGR2,FOSB,KLF2,DUSP6,BTG2,FOS,TRIB1,CTGF,DUSP5,JUN,IGF2,CYR61,KLF6,IER2,ZFP36
GO:0009719	response to endogenous stimulus	14	1353	0.89	5.33e-08	9606.ENSP00000239223,9606.ENSP00000239938,9606.ENSP00000242480,9606.ENSP00000245919,9606.ENSP00000248071,9606.ENSP00000270162,9606.ENSP00000290551,9606.ENSP00000306245,9606.ENSP00000356954,9606.ENSP00000360266,9606.ENSP00000365280,9606.ENSP00000391826,9606.ENSP00000465617,9606.ENSP00000469647	DUSP1,EGR1,EGR2,FOSB,KLF2,SIK1,BTG2,FOS,CTGF,JUN,ID1,IGF2,IER2,ZFP36
GO:1901700	response to oxygen-containing compound	14	1427	0.87	9.36e-08	9606.ENSP00000239223,9606.ENSP00000239938,9606.ENSP00000242480,9606.ENSP00000245919,9606.ENSP00000248071,9606.ENSP00000272233,9606.ENSP00000290551,9606.ENSP00000306245,9606.ENSP00000312150,9606.ENSP00000356954,9606.ENSP00000360266,9606.ENSP00000365280,9606.ENSP00000391826,9606.ENSP00000469647	DUSP1,EGR1,EGR2,FOSB,KLF2,RHOB,BTG2,FOS,TRIB1,CTGF,JUN,ID1,IGF2,ZFP36
GO:0051171	regulation of nitrogen compound metabolic process	23	5827	0.47	1.22e-07	9606.ENSP00000215631,9606.ENSP00000230990,9606.ENSP00000238647,9606.ENSP00000239223,9606.ENSP00000239938,9606.ENSP00000242480,9606.ENSP00000245919,9606.ENSP00000248071,9606.ENSP00000270162,9606.ENSP00000279488,9606.ENSP00000290551,9606.ENSP00000306245,9606.ENSP00000312150,9606.ENSP00000356954,9606.ENSP00000358596,9606.ENSP00000360266,9606.ENSP00000365280,9606.ENSP00000391826,9606.ENSP00000398736,…	GADD45B,HBEGF,IRF2BPL,DUSP1,EGR1,EGR2,FOSB,KLF2,SIK1,DUSP6,BTG2,FOS,TRIB1,CTGF,DUSP5,JUN,ID1,IGF2,CYR61,KLF6,IER2,ZFP36,C17orf96
GO:0080090	regulation of primary metabolic process	23	5982	0.46	1.94e-07	9606.ENSP00000215631,9606.ENSP00000230990,9606.ENSP00000238647,9606.ENSP00000239223,9606.ENSP00000239938,9606.ENSP00000242480,9606.ENSP00000245919,9606.ENSP00000248071,9606.ENSP00000270162,9606.ENSP00000279488,9606.ENSP00000290551,9606.ENSP00000306245,9606.ENSP00000312150,9606.ENSP00000356954,9606.ENSP00000358596,9606.ENSP00000360266,9606.ENSP00000365280,9606.ENSP00000391826,9606.ENSP00000398736,…	GADD45B,HBEGF,IRF2BPL,DUSP1,EGR1,EGR2,FOSB,KLF2,SIK1,DUSP6,BTG2,FOS,TRIB1,CTGF,DUSP5,JUN,ID1,IGF2,CYR61,KLF6,IER2,ZFP36,C17orf96
GO:0031323	regulation of cellular metabolic process	23	6082	0.45	2.44e-07	9606.ENSP00000215631,9606.ENSP00000230990,9606.ENSP00000238647,9606.ENSP00000239223,9606.ENSP00000239938,9606.ENSP00000242480,9606.ENSP00000245919,9606.ENSP00000248071,9606.ENSP00000270162,9606.ENSP00000279488,9606.ENSP00000290551,9606.ENSP00000306245,9606.ENSP00000312150,9606.ENSP00000356954,9606.ENSP00000358596,9606.ENSP00000360266,9606.ENSP00000365280,9606.ENSP00000391826,9606.ENSP00000398736,…	GADD45B,HBEGF,IRF2BPL,DUSP1,EGR1,EGR2,FOSB,KLF2,SIK1,DUSP6,BTG2,FOS,TRIB1,CTGF,DUSP5,JUN,ID1,IGF2,CYR61,KLF6,IER2,ZFP36,C17orf96
GO:0060255	regulation of macromolecule metabolic process	23	6072	0.45	2.44e-07	9606.ENSP00000215631,9606.ENSP00000230990,9606.ENSP00000238647,9606.ENSP00000239223,9606.ENSP00000239938,9606.ENSP00000242480,9606.ENSP00000245919,9606.ENSP00000248071,9606.ENSP00000270162,9606.ENSP00000279488,9606.ENSP00000290551,9606.ENSP00000306245,9606.ENSP00000312150,9606.ENSP00000356954,9606.ENSP00000358596,9606.ENSP00000360266,9606.ENSP00000365280,9606.ENSP00000391826,9606.ENSP00000398736,…	GADD45B,HBEGF,IRF2BPL,DUSP1,EGR1,EGR2,FOSB,KLF2,SIK1,DUSP6,BTG2,FOS,TRIB1,CTGF,DUSP5,JUN,ID1,IGF2,CYR61,KLF6,IER2,ZFP36,C17orf96
GO:0032502	developmental process	22	5401	0.49	2.47e-07	9606.ENSP00000215631,9606.ENSP00000230990,9606.ENSP00000238647,9606.ENSP00000239223,9606.ENSP00000239938,9606.ENSP00000242480,9606.ENSP00000248071,9606.ENSP00000259874,9606.ENSP00000270162,9606.ENSP00000272233,9606.ENSP00000279488,9606.ENSP00000290551,9606.ENSP00000306245,9606.ENSP00000356954,9606.ENSP00000358596,9606.ENSP00000360266,9606.ENSP00000365280,9606.ENSP00000391826,9606.ENSP00000398736,…	GADD45B,HBEGF,IRF2BPL,DUSP1,EGR1,EGR2,KLF2,IER3,SIK1,RHOB,DUSP6,BTG2,FOS,CTGF,DUSP5,JUN,ID1,IGF2,CYR61,KLF6,IER2,C17orf96
GO:0009888	tissue development	14	1626	0.81	2.92e-07	9606.ENSP00000230990,9606.ENSP00000239223,9606.ENSP00000239938,9606.ENSP00000242480,9606.ENSP00000248071,9606.ENSP00000270162,9606.ENSP00000272233,9606.ENSP00000290551,9606.ENSP00000306245,9606.ENSP00000356954,9606.ENSP00000358596,9606.ENSP00000360266,9606.ENSP00000365280,9606.ENSP00000398736	HBEGF,DUSP1,EGR1,EGR2,KLF2,SIK1,RHOB,BTG2,FOS,CTGF,DUSP5,JUN,ID1,CYR61
GO:0009892	negative regulation of metabolic process	17	2762	0.67	2.97e-07	9606.ENSP00000215631,9606.ENSP00000230990,9606.ENSP00000238647,9606.ENSP00000239223,9606.ENSP00000239938,9606.ENSP00000245919,9606.ENSP00000248071,9606.ENSP00000270162,9606.ENSP00000279488,9606.ENSP00000290551,9606.ENSP00000312150,9606.ENSP00000356954,9606.ENSP00000358596,9606.ENSP00000360266,9606.ENSP00000365280,9606.ENSP00000391826,9606.ENSP00000469647	GADD45B,HBEGF,IRF2BPL,DUSP1,EGR1,FOSB,KLF2,SIK1,DUSP6,BTG2,TRIB1,CTGF,DUSP5,JUN,ID1,IGF2,ZFP36
GO:0010941	regulation of cell death	14	1638	0.81	2.97e-07	9606.ENSP00000215631,9606.ENSP00000239223,9606.ENSP00000239938,9606.ENSP00000259874,9606.ENSP00000270162,9606.ENSP00000272233,9606.ENSP00000279488,9606.ENSP00000290551,9606.ENSP00000306245,9606.ENSP00000356954,9606.ENSP00000360266,9606.ENSP00000365280,9606.ENSP00000398736,9606.ENSP00000469647	GADD45B,DUSP1,EGR1,IER3,SIK1,RHOB,DUSP6,BTG2,FOS,CTGF,JUN,ID1,CYR61,ZFP36
GO:0009725	response to hormone	11	854	0.99	3.91e-07	9606.ENSP00000239223,9606.ENSP00000239938,9606.ENSP00000242480,9606.ENSP00000245919,9606.ENSP00000270162,9606.ENSP00000290551,9606.ENSP00000306245,9606.ENSP00000356954,9606.ENSP00000360266,9606.ENSP00000391826,9606.ENSP00000469647	DUSP1,EGR1,EGR2,FOSB,SIK1,BTG2,FOS,CTGF,JUN,IGF2,ZFP36
GO:0009889	regulation of biosynthetic process	20	4337	0.54	3.91e-07	9606.ENSP00000230990,9606.ENSP00000238647,9606.ENSP00000239223,9606.ENSP00000239938,9606.ENSP00000242480,9606.ENSP00000245919,9606.ENSP00000248071,9606.ENSP00000270162,9606.ENSP00000290551,9606.ENSP00000306245,9606.ENSP00000312150,9606.ENSP00000356954,9606.ENSP00000360266,9606.ENSP00000365280,9606.ENSP00000391826,9606.ENSP00000398736,9606.ENSP00000419923,9606.ENSP00000465617,9606.ENSP00000469647,…	HBEGF,IRF2BPL,DUSP1,EGR1,EGR2,FOSB,KLF2,SIK1,BTG2,FOS,TRIB1,CTGF,JUN,ID1,IGF2,CYR61,KLF6,IER2,ZFP36,C17orf96
GO:0010243	response to organonitrogen compound	11	876	0.98	4.57e-07	9606.ENSP00000239223,9606.ENSP00000239938,9606.ENSP00000242480,9606.ENSP00000245919,9606.ENSP00000248071,9606.ENSP00000290551,9606.ENSP00000306245,9606.ENSP00000356954,9606.ENSP00000360266,9606.ENSP00000365280,9606.ENSP00000391826	DUSP1,EGR1,EGR2,FOSB,KLF2,BTG2,FOS,CTGF,JUN,ID1,IGF2
GO:0010942	positive regulation of cell death	10	663	1.06	4.57e-07	9606.ENSP00000215631,9606.ENSP00000239223,9606.ENSP00000239938,9606.ENSP00000270162,9606.ENSP00000272233,9606.ENSP00000279488,9606.ENSP00000306245,9606.ENSP00000356954,9606.ENSP00000360266,9606.ENSP00000398736	GADD45B,DUSP1,EGR1,SIK1,RHOB,DUSP6,FOS,CTGF,JUN,CYR61
GO:0014070	response to organic cyclic compound	11	873	0.98	4.57e-07	9606.ENSP00000239223,9606.ENSP00000239938,9606.ENSP00000245919,9606.ENSP00000248071,9606.ENSP00000279488,9606.ENSP00000290551,9606.ENSP00000306245,9606.ENSP00000356954,9606.ENSP00000360266,9606.ENSP00000365280,9606.ENSP00000469647	DUSP1,EGR1,FOSB,KLF2,DUSP6,BTG2,FOS,CTGF,JUN,ID1,ZFP36
GO:0031324	negative regulation of cellular metabolic process	16	2463	0.69	4.57e-07	9606.ENSP00000215631,9606.ENSP00000230990,9606.ENSP00000238647,9606.ENSP00000239223,9606.ENSP00000239938,9606.ENSP00000245919,9606.ENSP00000248071,9606.ENSP00000270162,9606.ENSP00000279488,9606.ENSP00000290551,9606.ENSP00000312150,9606.ENSP00000358596,9606.ENSP00000360266,9606.ENSP00000365280,9606.ENSP00000391826,9606.ENSP00000469647	GADD45B,HBEGF,IRF2BPL,DUSP1,EGR1,FOSB,KLF2,SIK1,DUSP6,BTG2,TRIB1,DUSP5,JUN,ID1,IGF2,ZFP36
GO:0048523	negative regulation of cellular process	20	4454	0.53	4.71e-07	9606.ENSP00000215631,9606.ENSP00000230990,9606.ENSP00000238647,9606.ENSP00000239223,9606.ENSP00000239938,9606.ENSP00000245919,9606.ENSP00000248071,9606.ENSP00000259874,9606.ENSP00000270162,9606.ENSP00000272233,9606.ENSP00000279488,9606.ENSP00000290551,9606.ENSP00000312150,9606.ENSP00000356954,9606.ENSP00000358596,9606.ENSP00000360266,9606.ENSP00000365280,9606.ENSP00000391826,9606.ENSP00000398736,…	GADD45B,HBEGF,IRF2BPL,DUSP1,EGR1,FOSB,KLF2,IER3,SIK1,RHOB,DUSP6,BTG2,TRIB1,CTGF,DUSP5,JUN,ID1,IGF2,CYR61,ZFP36
GO:0048856	anatomical structure development	21	5085	0.49	4.92e-07	9606.ENSP00000215631,9606.ENSP00000230990,9606.ENSP00000239223,9606.ENSP00000239938,9606.ENSP00000242480,9606.ENSP00000248071,9606.ENSP00000259874,9606.ENSP00000270162,9606.ENSP00000272233,9606.ENSP00000279488,9606.ENSP00000290551,9606.ENSP00000306245,9606.ENSP00000356954,9606.ENSP00000358596,9606.ENSP00000360266,9606.ENSP00000365280,9606.ENSP00000391826,9606.ENSP00000398736,9606.ENSP00000419923,…	GADD45B,HBEGF,DUSP1,EGR1,EGR2,KLF2,IER3,SIK1,RHOB,DUSP6,BTG2,FOS,CTGF,DUSP5,JUN,ID1,IGF2,CYR61,KLF6,IER2,C17orf96
GO:0010605	negative regulation of macromolecule metabolic process	16	2558	0.67	5.89e-07	9606.ENSP00000215631,9606.ENSP00000230990,9606.ENSP00000238647,9606.ENSP00000239223,9606.ENSP00000239938,9606.ENSP00000245919,9606.ENSP00000248071,9606.ENSP00000279488,9606.ENSP00000290551,9606.ENSP00000312150,9606.ENSP00000356954,9606.ENSP00000358596,9606.ENSP00000360266,9606.ENSP00000365280,9606.ENSP00000391826,9606.ENSP00000469647	GADD45B,HBEGF,IRF2BPL,DUSP1,EGR1,FOSB,KLF2,DUSP6,BTG2,TRIB1,CTGF,DUSP5,JUN,ID1,IGF2,ZFP36
GO:0010628	positive regulation of gene expression	14	1826	0.76	6.73e-07	9606.ENSP00000238647,9606.ENSP00000239938,9606.ENSP00000242480,9606.ENSP00000245919,9606.ENSP00000248071,9606.ENSP00000306245,9606.ENSP00000356954,9606.ENSP00000360266,9606.ENSP00000365280,9606.ENSP00000391826,9606.ENSP00000398736,9606.ENSP00000419923,9606.ENSP00000465617,9606.ENSP00000469647	IRF2BPL,EGR1,EGR2,FOSB,KLF2,FOS,CTGF,JUN,ID1,IGF2,CYR61,KLF6,IER2,ZFP36
GO:0042981	regulation of apoptotic process	13	1501	0.81	6.73e-07	9606.ENSP00000215631,9606.ENSP00000239223,9606.ENSP00000239938,9606.ENSP00000259874,9606.ENSP00000270162,9606.ENSP00000272233,9606.ENSP00000279488,9606.ENSP00000290551,9606.ENSP00000356954,9606.ENSP00000360266,9606.ENSP00000365280,9606.ENSP00000398736,9606.ENSP00000469647	GADD45B,DUSP1,EGR1,IER3,SIK1,RHOB,DUSP6,BTG2,CTGF,JUN,ID1,CYR61,ZFP36
GO:0043408	regulation of MAPK cascade	10	712	1.02	6.73e-07	9606.ENSP00000215631,9606.ENSP00000239223,9606.ENSP00000279488,9606.ENSP00000312150,9606.ENSP00000356954,9606.ENSP00000358596,9606.ENSP00000360266,9606.ENSP00000365280,9606.ENSP00000391826,9606.ENSP00000398736	GADD45B,DUSP1,DUSP6,TRIB1,CTGF,DUSP5,JUN,ID1,IGF2,CYR61
GO:2000112	regulation of cellular macromolecule biosynthetic process	19	4050	0.55	6.96e-07	9606.ENSP00000230990,9606.ENSP00000238647,9606.ENSP00000239223,9606.ENSP00000239938,9606.ENSP00000242480,9606.ENSP00000245919,9606.ENSP00000248071,9606.ENSP00000270162,9606.ENSP00000290551,9606.ENSP00000306245,9606.ENSP00000312150,9606.ENSP00000360266,9606.ENSP00000365280,9606.ENSP00000391826,9606.ENSP00000398736,9606.ENSP00000419923,9606.ENSP00000465617,9606.ENSP00000469647,9606.ENSP00000484710	HBEGF,IRF2BPL,DUSP1,EGR1,EGR2,FOSB,KLF2,SIK1,BTG2,FOS,TRIB1,JUN,ID1,IGF2,CYR61,KLF6,IER2,ZFP36,C17orf96
GO:0007275	multicellular organism development	20	4726	0.5	9.64e-07	9606.ENSP00000215631,9606.ENSP00000230990,9606.ENSP00000239223,9606.ENSP00000239938,9606.ENSP00000242480,9606.ENSP00000248071,9606.ENSP00000270162,9606.ENSP00000272233,9606.ENSP00000279488,9606.ENSP00000290551,9606.ENSP00000306245,9606.ENSP00000356954,9606.ENSP00000358596,9606.ENSP00000360266,9606.ENSP00000365280,9606.ENSP00000391826,9606.ENSP00000398736,9606.ENSP00000419923,9606.ENSP00000465617,…	GADD45B,HBEGF,DUSP1,EGR1,EGR2,KLF2,SIK1,RHOB,DUSP6,BTG2,FOS,CTGF,DUSP5,JUN,ID1,IGF2,CYR61,KLF6,IER2,C17orf96
GO:0042221	response to chemical	19	4153	0.54	9.64e-07	9606.ENSP00000230990,9606.ENSP00000239223,9606.ENSP00000239938,9606.ENSP00000242480,9606.ENSP00000245919,9606.ENSP00000248071,9606.ENSP00000270162,9606.ENSP00000272233,9606.ENSP00000279488,9606.ENSP00000290551,9606.ENSP00000306245,9606.ENSP00000312150,9606.ENSP00000356954,9606.ENSP00000360266,9606.ENSP00000365280,9606.ENSP00000391826,9606.ENSP00000398736,9606.ENSP00000465617,9606.ENSP00000469647	HBEGF,DUSP1,EGR1,EGR2,FOSB,KLF2,SIK1,RHOB,DUSP6,BTG2,FOS,TRIB1,CTGF,JUN,ID1,IGF2,CYR61,IER2,ZFP36
GO:0051172	negative regulation of nitrogen compound metabolic process	15	2307	0.69	1.03e-06	9606.ENSP00000215631,9606.ENSP00000230990,9606.ENSP00000238647,9606.ENSP00000239223,9606.ENSP00000239938,9606.ENSP00000245919,9606.ENSP00000248071,9606.ENSP00000279488,9606.ENSP00000290551,9606.ENSP00000312150,9606.ENSP00000358596,9606.ENSP00000360266,9606.ENSP00000365280,9606.ENSP00000391826,9606.ENSP00000469647	GADD45B,HBEGF,IRF2BPL,DUSP1,EGR1,FOSB,KLF2,DUSP6,BTG2,TRIB1,DUSP5,JUN,ID1,IGF2,ZFP36
GO:0051254	positive regulation of RNA metabolic process	13	1596	0.79	1.06e-06	9606.ENSP00000238647,9606.ENSP00000239938,9606.ENSP00000242480,9606.ENSP00000245919,9606.ENSP00000248071,9606.ENSP00000290551,9606.ENSP00000306245,9606.ENSP00000360266,9606.ENSP00000391826,9606.ENSP00000398736,9606.ENSP00000419923,9606.ENSP00000465617,9606.ENSP00000469647	IRF2BPL,EGR1,EGR2,FOSB,KLF2,BTG2,FOS,JUN,IGF2,CYR61,KLF6,IER2,ZFP36
GO:0010033	response to organic substance	16	2815	0.63	1.57e-06	9606.ENSP00000239223,9606.ENSP00000239938,9606.ENSP00000242480,9606.ENSP00000245919,9606.ENSP00000248071,9606.ENSP00000270162,9606.ENSP00000279488,9606.ENSP00000290551,9606.ENSP00000306245,9606.ENSP00000312150,9606.ENSP00000356954,9606.ENSP00000360266,9606.ENSP00000365280,9606.ENSP00000391826,9606.ENSP00000465617,9606.ENSP00000469647	DUSP1,EGR1,EGR2,FOSB,KLF2,SIK1,DUSP6,BTG2,FOS,TRIB1,CTGF,JUN,ID1,IGF2,IER2,ZFP36
GO:0001932	regulation of protein phosphorylation	12	1370	0.82	1.9e-06	9606.ENSP00000215631,9606.ENSP00000230990,9606.ENSP00000239223,9606.ENSP00000239938,9606.ENSP00000279488,9606.ENSP00000312150,9606.ENSP00000356954,9606.ENSP00000358596,9606.ENSP00000360266,9606.ENSP00000365280,9606.ENSP00000391826,9606.ENSP00000398736	GADD45B,HBEGF,DUSP1,EGR1,DUSP6,TRIB1,CTGF,DUSP5,JUN,ID1,IGF2,CYR61
GO:0045944	positive regulation of transcription by RNA polymerase II	11	1104	0.87	2.27e-06	9606.ENSP00000238647,9606.ENSP00000239938,9606.ENSP00000242480,9606.ENSP00000245919,9606.ENSP00000248071,9606.ENSP00000306245,9606.ENSP00000360266,9606.ENSP00000391826,9606.ENSP00000398736,9606.ENSP00000419923,9606.ENSP00000465617	IRF2BPL,EGR1,EGR2,FOSB,KLF2,FOS,JUN,IGF2,CYR61,KLF6,IER2
GO:0071495	cellular response to endogenous stimulus	11	1106	0.87	2.27e-06	9606.ENSP00000239223,9606.ENSP00000239938,9606.ENSP00000245919,9606.ENSP00000248071,9606.ENSP00000270162,9606.ENSP00000306245,9606.ENSP00000356954,9606.ENSP00000360266,9606.ENSP00000365280,9606.ENSP00000391826,9606.ENSP00000469647	DUSP1,EGR1,FOSB,KLF2,SIK1,FOS,CTGF,JUN,ID1,IGF2,ZFP36
GO:1902531	regulation of intracellular signal transduction	13	1764	0.74	2.9e-06	9606.ENSP00000215631,9606.ENSP00000230990,9606.ENSP00000239223,9606.ENSP00000259874,9606.ENSP00000272233,9606.ENSP00000279488,9606.ENSP00000312150,9606.ENSP00000356954,9606.ENSP00000358596,9606.ENSP00000360266,9606.ENSP00000365280,9606.ENSP00000391826,9606.ENSP00000398736	GADD45B,HBEGF,DUSP1,IER3,RHOB,DUSP6,TRIB1,CTGF,DUSP5,JUN,ID1,IGF2,CYR61
GO:0030154	cell differentiation	17	3457	0.57	3.05e-06	9606.ENSP00000215631,9606.ENSP00000239938,9606.ENSP00000242480,9606.ENSP00000248071,9606.ENSP00000270162,9606.ENSP00000272233,9606.ENSP00000279488,9606.ENSP00000290551,9606.ENSP00000306245,9606.ENSP00000356954,9606.ENSP00000360266,9606.ENSP00000365280,9606.ENSP00000391826,9606.ENSP00000398736,9606.ENSP00000419923,9606.ENSP00000465617,9606.ENSP00000484710	GADD45B,EGR1,EGR2,KLF2,SIK1,RHOB,DUSP6,BTG2,FOS,CTGF,JUN,ID1,IGF2,CYR61,KLF6,IER2,C17orf96
GO:0031327	negative regulation of cellular biosynthetic process	12	1479	0.79	3.75e-06	9606.ENSP00000230990,9606.ENSP00000238647,9606.ENSP00000239223,9606.ENSP00000239938,9606.ENSP00000245919,9606.ENSP00000248071,9606.ENSP00000270162,9606.ENSP00000290551,9606.ENSP00000360266,9606.ENSP00000365280,9606.ENSP00000391826,9606.ENSP00000469647	HBEGF,IRF2BPL,DUSP1,EGR1,FOSB,KLF2,SIK1,BTG2,JUN,ID1,IGF2,ZFP36
GO:0006357	regulation of transcription by RNA polymerase II	15	2633	0.63	4.32e-06	9606.ENSP00000238647,9606.ENSP00000239938,9606.ENSP00000242480,9606.ENSP00000245919,9606.ENSP00000248071,9606.ENSP00000290551,9606.ENSP00000306245,9606.ENSP00000360266,9606.ENSP00000365280,9606.ENSP00000391826,9606.ENSP00000398736,9606.ENSP00000419923,9606.ENSP00000465617,9606.ENSP00000469647,9606.ENSP00000484710	IRF2BPL,EGR1,EGR2,FOSB,KLF2,BTG2,FOS,JUN,ID1,IGF2,CYR61,KLF6,IER2,ZFP36,C17orf96
GO:0019219	regulation of nucleobase-containing compound metabolic process	18	4133	0.52	5.06e-06	9606.ENSP00000238647,9606.ENSP00000239223,9606.ENSP00000239938,9606.ENSP00000242480,9606.ENSP00000245919,9606.ENSP00000248071,9606.ENSP00000270162,9606.ENSP00000290551,9606.ENSP00000306245,9606.ENSP00000312150,9606.ENSP00000360266,9606.ENSP00000365280,9606.ENSP00000391826,9606.ENSP00000398736,9606.ENSP00000419923,9606.ENSP00000465617,9606.ENSP00000469647,9606.ENSP00000484710	IRF2BPL,DUSP1,EGR1,EGR2,FOSB,KLF2,SIK1,BTG2,FOS,TRIB1,JUN,ID1,IGF2,CYR61,KLF6,IER2,ZFP36,C17orf96
GO:0051246	regulation of protein metabolic process	15	2668	0.63	5.06e-06	9606.ENSP00000215631,9606.ENSP00000230990,9606.ENSP00000239223,9606.ENSP00000239938,9606.ENSP00000248071,9606.ENSP00000279488,9606.ENSP00000290551,9606.ENSP00000312150,9606.ENSP00000356954,9606.ENSP00000358596,9606.ENSP00000360266,9606.ENSP00000365280,9606.ENSP00000391826,9606.ENSP00000398736,9606.ENSP00000469647	GADD45B,HBEGF,DUSP1,EGR1,KLF2,DUSP6,BTG2,TRIB1,CTGF,DUSP5,JUN,ID1,IGF2,CYR61,ZFP36
GO:0070848	response to growth factor	8	507	1.07	5.81e-06	9606.ENSP00000239938,9606.ENSP00000279488,9606.ENSP00000306245,9606.ENSP00000356954,9606.ENSP00000360266,9606.ENSP00000365280,9606.ENSP00000465617,9606.ENSP00000469647	EGR1,DUSP6,FOS,CTGF,JUN,ID1,IER2,ZFP36
GO:0006355	regulation of transcription, DNA-templated	17	3661	0.54	6.07e-06	9606.ENSP00000238647,9606.ENSP00000239938,9606.ENSP00000242480,9606.ENSP00000245919,9606.ENSP00000248071,9606.ENSP00000270162,9606.ENSP00000290551,9606.ENSP00000306245,9606.ENSP00000312150,9606.ENSP00000360266,9606.ENSP00000365280,9606.ENSP00000391826,9606.ENSP00000398736,9606.ENSP00000419923,9606.ENSP00000465617,9606.ENSP00000469647,9606.ENSP00000484710	IRF2BPL,EGR1,EGR2,FOSB,KLF2,SIK1,BTG2,FOS,TRIB1,JUN,ID1,IGF2,CYR61,KLF6,IER2,ZFP36,C17orf96
GO:2000113	negative regulation of cellular macromolecule biosynthetic process	11	1348	0.79	1.18e-05	9606.ENSP00000230990,9606.ENSP00000238647,9606.ENSP00000239223,9606.ENSP00000239938,9606.ENSP00000245919,9606.ENSP00000248071,9606.ENSP00000290551,9606.ENSP00000360266,9606.ENSP00000365280,9606.ENSP00000391826,9606.ENSP00000469647	HBEGF,IRF2BPL,DUSP1,EGR1,FOSB,KLF2,BTG2,JUN,ID1,IGF2,ZFP36
GO:0000122	negative regulation of transcription by RNA polymerase II	9	809	0.92	1.38e-05	9606.ENSP00000238647,9606.ENSP00000239938,9606.ENSP00000245919,9606.ENSP00000248071,9606.ENSP00000290551,9606.ENSP00000360266,9606.ENSP00000365280,9606.ENSP00000391826,9606.ENSP00000469647	IRF2BPL,EGR1,FOSB,KLF2,BTG2,JUN,ID1,IGF2,ZFP36
GO:0032268	regulation of cellular protein metabolic process	14	2486	0.63	1.41e-05	9606.ENSP00000215631,9606.ENSP00000230990,9606.ENSP00000239223,9606.ENSP00000239938,9606.ENSP00000279488,9606.ENSP00000290551,9606.ENSP00000312150,9606.ENSP00000356954,9606.ENSP00000358596,9606.ENSP00000360266,9606.ENSP00000365280,9606.ENSP00000391826,9606.ENSP00000398736,9606.ENSP00000469647	GADD45B,HBEGF,DUSP1,EGR1,DUSP6,BTG2,TRIB1,CTGF,DUSP5,JUN,ID1,IGF2,CYR61,ZFP36
GO:0044260	cellular macromolecule metabolic process	21	6413	0.39	1.53e-05	9606.ENSP00000230990,9606.ENSP00000239223,9606.ENSP00000239938,9606.ENSP00000242480,9606.ENSP00000245919,9606.ENSP00000248071,9606.ENSP00000270162,9606.ENSP00000279488,9606.ENSP00000290551,9606.ENSP00000306245,9606.ENSP00000312150,9606.ENSP00000356954,9606.ENSP00000358596,9606.ENSP00000360266,9606.ENSP00000365280,9606.ENSP00000391826,9606.ENSP00000398736,9606.ENSP00000419923,9606.ENSP00000465617,…	HBEGF,DUSP1,EGR1,EGR2,FOSB,KLF2,SIK1,DUSP6,BTG2,FOS,TRIB1,CTGF,DUSP5,JUN,ID1,IGF2,CYR61,KLF6,IER2,ZFP36,C17orf96
GO:0010468	regulation of gene expression	18	4533	0.48	1.75e-05	9606.ENSP00000238647,9606.ENSP00000239938,9606.ENSP00000242480,9606.ENSP00000245919,9606.ENSP00000248071,9606.ENSP00000270162,9606.ENSP00000290551,9606.ENSP00000306245,9606.ENSP00000312150,9606.ENSP00000356954,9606.ENSP00000360266,9606.ENSP00000365280,9606.ENSP00000391826,9606.ENSP00000398736,9606.ENSP00000419923,9606.ENSP00000465617,9606.ENSP00000469647,9606.ENSP00000484710	IRF2BPL,EGR1,EGR2,FOSB,KLF2,SIK1,BTG2,FOS,TRIB1,CTGF,JUN,ID1,IGF2,CYR61,KLF6,IER2,ZFP36,C17orf96
GO:0043065	positive regulation of apoptotic process	8	604	1	1.75e-05	9606.ENSP00000215631,9606.ENSP00000239223,9606.ENSP00000270162,9606.ENSP00000272233,9606.ENSP00000279488,9606.ENSP00000356954,9606.ENSP00000360266,9606.ENSP00000398736	GADD45B,DUSP1,SIK1,RHOB,DUSP6,CTGF,JUN,CYR61
GO:0035914	skeletal muscle cell differentiation	4	52	1.76	1.77e-05	9606.ENSP00000239938,9606.ENSP00000242480,9606.ENSP00000290551,9606.ENSP00000306245	EGR1,EGR2,BTG2,FOS
GO:0032501	multicellular organismal process	21	6507	0.39	1.81e-05	9606.ENSP00000215631,9606.ENSP00000230990,9606.ENSP00000239223,9606.ENSP00000239938,9606.ENSP00000242480,9606.ENSP00000245919,9606.ENSP00000248071,9606.ENSP00000270162,9606.ENSP00000272233,9606.ENSP00000279488,9606.ENSP00000290551,9606.ENSP00000306245,9606.ENSP00000356954,9606.ENSP00000358596,9606.ENSP00000360266,9606.ENSP00000365280,9606.ENSP00000391826,9606.ENSP00000398736,9606.ENSP00000419923,…	GADD45B,HBEGF,DUSP1,EGR1,EGR2,FOSB,KLF2,SIK1,RHOB,DUSP6,BTG2,FOS,CTGF,DUSP5,JUN,ID1,IGF2,CYR61,KLF6,IER2,C17orf96
GO:1901652	response to peptide	7	431	1.09	2.34e-05	9606.ENSP00000239938,9606.ENSP00000242480,9606.ENSP00000248071,9606.ENSP00000290551,9606.ENSP00000356954,9606.ENSP00000365280,9606.ENSP00000391826	EGR1,EGR2,KLF2,BTG2,CTGF,ID1,IGF2
GO:0042493	response to drug	9	900	0.88	2.79e-05	9606.ENSP00000239223,9606.ENSP00000239938,9606.ENSP00000245919,9606.ENSP00000248071,9606.ENSP00000272233,9606.ENSP00000279488,9606.ENSP00000306245,9606.ENSP00000360266,9606.ENSP00000365280	DUSP1,EGR1,FOSB,KLF2,RHOB,DUSP6,FOS,JUN,ID1
GO:0070887	cellular response to chemical stimulus	14	2672	0.6	2.87e-05	9606.ENSP00000230990,9606.ENSP00000239223,9606.ENSP00000239938,9606.ENSP00000242480,9606.ENSP00000245919,9606.ENSP00000248071,9606.ENSP00000270162,9606.ENSP00000272233,9606.ENSP00000306245,9606.ENSP00000356954,9606.ENSP00000360266,9606.ENSP00000365280,9606.ENSP00000391826,9606.ENSP00000469647	HBEGF,DUSP1,EGR1,EGR2,FOSB,KLF2,SIK1,RHOB,FOS,CTGF,JUN,ID1,IGF2,ZFP36
GO:0009891	positive regulation of biosynthetic process	12	1876	0.68	3.06e-05	9606.ENSP00000238647,9606.ENSP00000239938,9606.ENSP00000242480,9606.ENSP00000245919,9606.ENSP00000248071,9606.ENSP00000306245,9606.ENSP00000356954,9606.ENSP00000360266,9606.ENSP00000391826,9606.ENSP00000398736,9606.ENSP00000419923,9606.ENSP00000465617	IRF2BPL,EGR1,EGR2,FOSB,KLF2,FOS,CTGF,JUN,IGF2,CYR61,KLF6,IER2
GO:0035556	intracellular signal transduction	11	1528	0.73	3.09e-05	9606.ENSP00000230990,9606.ENSP00000239223,9606.ENSP00000270162,9606.ENSP00000272233,9606.ENSP00000279488,9606.ENSP00000290551,9606.ENSP00000312150,9606.ENSP00000356954,9606.ENSP00000358596,9606.ENSP00000360266,9606.ENSP00000469647	HBEGF,DUSP1,SIK1,RHOB,DUSP6,BTG2,TRIB1,CTGF,DUSP5,JUN,ZFP36
GO:0061061	muscle structure development	7	457	1.06	3.14e-05	9606.ENSP00000230990,9606.ENSP00000239938,9606.ENSP00000242480,9606.ENSP00000270162,9606.ENSP00000290551,9606.ENSP00000306245,9606.ENSP00000391826	HBEGF,EGR1,EGR2,SIK1,BTG2,FOS,IGF2
GO:0031960	response to corticosteroid	5	154	1.39	3.3e-05	9606.ENSP00000239223,9606.ENSP00000245919,9606.ENSP00000306245,9606.ENSP00000356954,9606.ENSP00000469647	DUSP1,FOSB,FOS,CTGF,ZFP36
GO:0001934	positive regulation of protein phosphorylation	9	941	0.86	3.63e-05	9606.ENSP00000215631,9606.ENSP00000230990,9606.ENSP00000239938,9606.ENSP00000279488,9606.ENSP00000356954,9606.ENSP00000358596,9606.ENSP00000360266,9606.ENSP00000391826,9606.ENSP00000398736	GADD45B,HBEGF,EGR1,DUSP6,CTGF,DUSP5,JUN,IGF2,CYR61
GO:0050794	regulation of cellular process	25	10484	0.25	3.65e-05	9606.ENSP00000215631,9606.ENSP00000230990,9606.ENSP00000238647,9606.ENSP00000239223,9606.ENSP00000239938,9606.ENSP00000242480,9606.ENSP00000245919,9606.ENSP00000248071,9606.ENSP00000259874,9606.ENSP00000270162,9606.ENSP00000272233,9606.ENSP00000279488,9606.ENSP00000290551,9606.ENSP00000306245,9606.ENSP00000312150,9606.ENSP00000356954,9606.ENSP00000358596,9606.ENSP00000360266,9606.ENSP00000365280,…	GADD45B,HBEGF,IRF2BPL,DUSP1,EGR1,EGR2,FOSB,KLF2,IER3,SIK1,RHOB,DUSP6,BTG2,FOS,TRIB1,CTGF,DUSP5,JUN,ID1,IGF2,CYR61,KLF6,IER2,ZFP36,C17orf96
GO:0051247	positive regulation of protein metabolic process	11	1587	0.72	4.22e-05	9606.ENSP00000215631,9606.ENSP00000230990,9606.ENSP00000239938,9606.ENSP00000248071,9606.ENSP00000279488,9606.ENSP00000312150,9606.ENSP00000356954,9606.ENSP00000358596,9606.ENSP00000360266,9606.ENSP00000391826,9606.ENSP00000398736	GADD45B,HBEGF,EGR1,KLF2,DUSP6,TRIB1,CTGF,DUSP5,JUN,IGF2,CYR61
GO:0042127	regulation of cell population proliferation	11	1594	0.72	4.25e-05	9606.ENSP00000230990,9606.ENSP00000239223,9606.ENSP00000239938,9606.ENSP00000290551,9606.ENSP00000312150,9606.ENSP00000356954,9606.ENSP00000360266,9606.ENSP00000365280,9606.ENSP00000391826,9606.ENSP00000398736,9606.ENSP00000469647	HBEGF,DUSP1,EGR1,BTG2,TRIB1,CTGF,JUN,ID1,IGF2,CYR61,ZFP36
GO:0051239	regulation of multicellular organismal process	14	2788	0.58	4.25e-05	9606.ENSP00000230990,9606.ENSP00000239938,9606.ENSP00000242480,9606.ENSP00000248071,9606.ENSP00000272233,9606.ENSP00000279488,9606.ENSP00000306245,9606.ENSP00000312150,9606.ENSP00000356954,9606.ENSP00000360266,9606.ENSP00000365280,9606.ENSP00000391826,9606.ENSP00000398736,9606.ENSP00000469647	HBEGF,EGR1,EGR2,KLF2,RHOB,DUSP6,FOS,TRIB1,CTGF,JUN,ID1,IGF2,CYR61,ZFP36
GO:0051338	regulation of transferase activity	9	964	0.85	4.25e-05	9606.ENSP00000215631,9606.ENSP00000239223,9606.ENSP00000239938,9606.ENSP00000279488,9606.ENSP00000312150,9606.ENSP00000358596,9606.ENSP00000391826,9606.ENSP00000398736,9606.ENSP00000469647	GADD45B,DUSP1,EGR1,DUSP6,TRIB1,DUSP5,IGF2,CYR61,ZFP36
GO:0046677	response to antibiotic	6	305	1.17	4.31e-05	9606.ENSP00000239223,9606.ENSP00000239938,9606.ENSP00000248071,9606.ENSP00000272233,9606.ENSP00000360266,9606.ENSP00000365280	DUSP1,EGR1,KLF2,RHOB,JUN,ID1
GO:0051348	negative regulation of transferase activity	6	310	1.16	4.67e-05	9606.ENSP00000215631,9606.ENSP00000239223,9606.ENSP00000279488,9606.ENSP00000312150,9606.ENSP00000358596,9606.ENSP00000469647	GADD45B,DUSP1,DUSP6,TRIB1,DUSP5,ZFP36
GO:0009653	anatomical structure morphogenesis	12	1992	0.66	4.82e-05	9606.ENSP00000230990,9606.ENSP00000239223,9606.ENSP00000242480,9606.ENSP00000248071,9606.ENSP00000259874,9606.ENSP00000272233,9606.ENSP00000356954,9606.ENSP00000358596,9606.ENSP00000360266,9606.ENSP00000365280,9606.ENSP00000391826,9606.ENSP00000398736	HBEGF,DUSP1,EGR2,KLF2,IER3,RHOB,CTGF,DUSP5,JUN,ID1,IGF2,CYR61
GO:0065009	regulation of molecular function	15	3322	0.53	5.09e-05	9606.ENSP00000215631,9606.ENSP00000230990,9606.ENSP00000239223,9606.ENSP00000239938,9606.ENSP00000270162,9606.ENSP00000279488,9606.ENSP00000306245,9606.ENSP00000312150,9606.ENSP00000356954,9606.ENSP00000358596,9606.ENSP00000360266,9606.ENSP00000365280,9606.ENSP00000391826,9606.ENSP00000398736,9606.ENSP00000469647	GADD45B,HBEGF,DUSP1,EGR1,SIK1,DUSP6,FOS,TRIB1,CTGF,DUSP5,JUN,ID1,IGF2,CYR61,ZFP36
GO:0010646	regulation of cell communication	15	3327	0.53	5.14e-05	9606.ENSP00000215631,9606.ENSP00000230990,9606.ENSP00000239223,9606.ENSP00000239938,9606.ENSP00000242480,9606.ENSP00000259874,9606.ENSP00000272233,9606.ENSP00000279488,9606.ENSP00000312150,9606.ENSP00000356954,9606.ENSP00000358596,9606.ENSP00000360266,9606.ENSP00000365280,9606.ENSP00000391826,9606.ENSP00000398736	GADD45B,HBEGF,DUSP1,EGR1,EGR2,IER3,RHOB,DUSP6,TRIB1,CTGF,DUSP5,JUN,ID1,IGF2,CYR61
GO:0050793	regulation of developmental process	13	2416	0.61	5.14e-05	9606.ENSP00000239938,9606.ENSP00000248071,9606.ENSP00000270162,9606.ENSP00000272233,9606.ENSP00000279488,9606.ENSP00000306245,9606.ENSP00000312150,9606.ENSP00000356954,9606.ENSP00000360266,9606.ENSP00000365280,9606.ENSP00000391826,9606.ENSP00000398736,9606.ENSP00000469647	EGR1,KLF2,SIK1,RHOB,DUSP6,FOS,TRIB1,CTGF,JUN,ID1,IGF2,CYR61,ZFP36
GO:0023051	regulation of signaling	15	3360	0.53	5.71e-05	9606.ENSP00000215631,9606.ENSP00000230990,9606.ENSP00000239223,9606.ENSP00000239938,9606.ENSP00000242480,9606.ENSP00000259874,9606.ENSP00000272233,9606.ENSP00000279488,9606.ENSP00000312150,9606.ENSP00000356954,9606.ENSP00000358596,9606.ENSP00000360266,9606.ENSP00000365280,9606.ENSP00000391826,9606.ENSP00000398736	GADD45B,HBEGF,DUSP1,EGR1,EGR2,IER3,RHOB,DUSP6,TRIB1,CTGF,DUSP5,JUN,ID1,IGF2,CYR61
GO:0000302	response to reactive oxygen species	5	189	1.3	7.38e-05	9606.ENSP00000239223,9606.ENSP00000248071,9606.ENSP00000272233,9606.ENSP00000306245,9606.ENSP00000360266	DUSP1,KLF2,RHOB,FOS,JUN
GO:0009628	response to abiotic stimulus	9	1052	0.81	7.62e-05	9606.ENSP00000239223,9606.ENSP00000239938,9606.ENSP00000245919,9606.ENSP00000270162,9606.ENSP00000272233,9606.ENSP00000290551,9606.ENSP00000306245,9606.ENSP00000356954,9606.ENSP00000360266	DUSP1,EGR1,FOSB,SIK1,RHOB,BTG2,FOS,CTGF,JUN
GO:0006366	transcription by RNA polymerase II	8	784	0.89	7.93e-05	9606.ENSP00000239938,9606.ENSP00000242480,9606.ENSP00000245919,9606.ENSP00000306245,9606.ENSP00000356954,9606.ENSP00000360266,9606.ENSP00000419923,9606.ENSP00000465617	EGR1,EGR2,FOSB,FOS,CTGF,JUN,KLF6,IER2
GO:0045859	regulation of protein kinase activity	8	788	0.88	8.15e-05	9606.ENSP00000215631,9606.ENSP00000239223,9606.ENSP00000239938,9606.ENSP00000279488,9606.ENSP00000312150,9606.ENSP00000358596,9606.ENSP00000391826,9606.ENSP00000398736	GADD45B,DUSP1,EGR1,DUSP6,TRIB1,DUSP5,IGF2,CYR61
GO:0051248	negative regulation of protein metabolic process	9	1075	0.8	8.63e-05	9606.ENSP00000215631,9606.ENSP00000230990,9606.ENSP00000239223,9606.ENSP00000279488,9606.ENSP00000290551,9606.ENSP00000312150,9606.ENSP00000358596,9606.ENSP00000360266,9606.ENSP00000469647	GADD45B,HBEGF,DUSP1,DUSP6,BTG2,TRIB1,DUSP5,JUN,ZFP36
GO:0009966	regulation of signal transduction	14	3033	0.54	9.58e-05	9606.ENSP00000215631,9606.ENSP00000230990,9606.ENSP00000239223,9606.ENSP00000239938,9606.ENSP00000259874,9606.ENSP00000272233,9606.ENSP00000279488,9606.ENSP00000312150,9606.ENSP00000356954,9606.ENSP00000358596,9606.ENSP00000360266,9606.ENSP00000365280,9606.ENSP00000391826,9606.ENSP00000398736	GADD45B,HBEGF,DUSP1,EGR1,IER3,RHOB,DUSP6,TRIB1,CTGF,DUSP5,JUN,ID1,IGF2,CYR61
GO:0000188	inactivation of MAPK activity	3	26	1.94	9.96e-05	9606.ENSP00000239223,9606.ENSP00000279488,9606.ENSP00000358596	DUSP1,DUSP6,DUSP5
GO:0045934	negative regulation of nucleobase-containing compound metabolic process	10	1424	0.72	0.0001	9606.ENSP00000238647,9606.ENSP00000239223,9606.ENSP00000239938,9606.ENSP00000245919,9606.ENSP00000248071,9606.ENSP00000290551,9606.ENSP00000360266,9606.ENSP00000365280,9606.ENSP00000391826,9606.ENSP00000469647	IRF2BPL,DUSP1,EGR1,FOSB,KLF2,BTG2,JUN,ID1,IGF2,ZFP36
GO:0032870	cellular response to hormone stimulus	7	585	0.95	0.00011	9606.ENSP00000239223,9606.ENSP00000245919,9606.ENSP00000270162,9606.ENSP00000306245,9606.ENSP00000360266,9606.ENSP00000391826,9606.ENSP00000469647	DUSP1,FOSB,SIK1,FOS,JUN,IGF2,ZFP36
GO:0044092	negative regulation of molecular function	9	1119	0.78	0.00011	9606.ENSP00000215631,9606.ENSP00000239223,9606.ENSP00000270162,9606.ENSP00000279488,9606.ENSP00000312150,9606.ENSP00000358596,9606.ENSP00000360266,9606.ENSP00000365280,9606.ENSP00000469647	GADD45B,DUSP1,SIK1,DUSP6,TRIB1,DUSP5,JUN,ID1,ZFP36
GO:0048646	anatomical structure formation involved in morphogenesis	8	831	0.86	0.00011	9606.ENSP00000239223,9606.ENSP00000242480,9606.ENSP00000272233,9606.ENSP00000356954,9606.ENSP00000358596,9606.ENSP00000360266,9606.ENSP00000365280,9606.ENSP00000398736	DUSP1,EGR2,RHOB,CTGF,DUSP5,JUN,ID1,CYR61
GO:0048731	system development	16	4144	0.46	0.00012	9606.ENSP00000230990,9606.ENSP00000239938,9606.ENSP00000242480,9606.ENSP00000248071,9606.ENSP00000270162,9606.ENSP00000272233,9606.ENSP00000290551,9606.ENSP00000306245,9606.ENSP00000356954,9606.ENSP00000360266,9606.ENSP00000365280,9606.ENSP00000391826,9606.ENSP00000398736,9606.ENSP00000419923,9606.ENSP00000465617,9606.ENSP00000484710	HBEGF,EGR1,EGR2,KLF2,SIK1,RHOB,BTG2,FOS,CTGF,JUN,ID1,IGF2,CYR61,KLF6,IER2,C17orf96
GO:0051385	response to mineralocorticoid	3	29	1.89	0.00012	9606.ENSP00000245919,9606.ENSP00000306245,9606.ENSP00000356954	FOSB,FOS,CTGF
GO:0051591	response to cAMP	4	98	1.49	0.00012	9606.ENSP00000239223,9606.ENSP00000245919,9606.ENSP00000306245,9606.ENSP00000360266	DUSP1,FOSB,FOS,JUN
GO:0071310	cellular response to organic substance	12	2219	0.61	0.00012	9606.ENSP00000239223,9606.ENSP00000239938,9606.ENSP00000242480,9606.ENSP00000245919,9606.ENSP00000248071,9606.ENSP00000270162,9606.ENSP00000306245,9606.ENSP00000356954,9606.ENSP00000360266,9606.ENSP00000365280,9606.ENSP00000391826,9606.ENSP00000469647	DUSP1,EGR1,EGR2,FOSB,KLF2,SIK1,FOS,CTGF,JUN,ID1,IGF2,ZFP36
GO:0032270	positive regulation of cellular protein metabolic process	10	1496	0.7	0.00014	9606.ENSP00000215631,9606.ENSP00000230990,9606.ENSP00000239938,9606.ENSP00000279488,9606.ENSP00000312150,9606.ENSP00000356954,9606.ENSP00000358596,9606.ENSP00000360266,9606.ENSP00000391826,9606.ENSP00000398736	GADD45B,HBEGF,EGR1,DUSP6,TRIB1,CTGF,DUSP5,JUN,IGF2,CYR61
GO:2000026	regulation of multicellular organismal development	11	1876	0.64	0.00015	9606.ENSP00000239938,9606.ENSP00000248071,9606.ENSP00000272233,9606.ENSP00000279488,9606.ENSP00000306245,9606.ENSP00000312150,9606.ENSP00000356954,9606.ENSP00000360266,9606.ENSP00000365280,9606.ENSP00000398736,9606.ENSP00000469647	EGR1,KLF2,RHOB,DUSP6,FOS,TRIB1,CTGF,JUN,ID1,CYR61,ZFP36
GO:1901701	cellular response to oxygen-containing compound	8	896	0.83	0.00017	9606.ENSP00000239938,9606.ENSP00000248071,9606.ENSP00000272233,9606.ENSP00000306245,9606.ENSP00000360266,9606.ENSP00000365280,9606.ENSP00000391826,9606.ENSP00000469647	EGR1,KLF2,RHOB,FOS,JUN,ID1,IGF2,ZFP36
GO:0042542	response to hydrogen peroxide	4	112	1.43	0.00018	9606.ENSP00000239223,9606.ENSP00000248071,9606.ENSP00000272233,9606.ENSP00000360266	DUSP1,KLF2,RHOB,JUN
GO:0001933	negative regulation of protein phosphorylation	6	422	1.03	0.00019	9606.ENSP00000215631,9606.ENSP00000239223,9606.ENSP00000279488,9606.ENSP00000312150,9606.ENSP00000358596,9606.ENSP00000360266	GADD45B,DUSP1,DUSP6,TRIB1,DUSP5,JUN
GO:0006950	response to stress	14	3267	0.51	0.00019	9606.ENSP00000215631,9606.ENSP00000230990,9606.ENSP00000239223,9606.ENSP00000239938,9606.ENSP00000248071,9606.ENSP00000272233,9606.ENSP00000279488,9606.ENSP00000290551,9606.ENSP00000306245,9606.ENSP00000312150,9606.ENSP00000356954,9606.ENSP00000360266,9606.ENSP00000398736,9606.ENSP00000469647	GADD45B,HBEGF,DUSP1,EGR1,KLF2,RHOB,DUSP6,BTG2,FOS,TRIB1,CTGF,JUN,CYR61,ZFP36
GO:0009314	response to radiation	6	425	1.03	0.00019	9606.ENSP00000239223,9606.ENSP00000239938,9606.ENSP00000270162,9606.ENSP00000272233,9606.ENSP00000306245,9606.ENSP00000360266	DUSP1,EGR1,SIK1,RHOB,FOS,JUN
GO:0048511	rhythmic process	5	250	1.18	0.00021	9606.ENSP00000239938,9606.ENSP00000242480,9606.ENSP00000270162,9606.ENSP00000360266,9606.ENSP00000365280	EGR1,EGR2,SIK1,JUN,ID1
GO:0006469	negative regulation of protein kinase activity	5	254	1.17	0.00022	9606.ENSP00000215631,9606.ENSP00000239223,9606.ENSP00000279488,9606.ENSP00000312150,9606.ENSP00000358596	GADD45B,DUSP1,DUSP6,TRIB1,DUSP5
GO:0034614	cellular response to reactive oxygen species	4	124	1.39	0.00025	9606.ENSP00000248071,9606.ENSP00000272233,9606.ENSP00000306245,9606.ENSP00000360266	KLF2,RHOB,FOS,JUN
GO:0048583	regulation of response to stimulus	15	3882	0.46	0.00025	9606.ENSP00000215631,9606.ENSP00000230990,9606.ENSP00000239223,9606.ENSP00000239938,9606.ENSP00000259874,9606.ENSP00000272233,9606.ENSP00000279488,9606.ENSP00000306245,9606.ENSP00000312150,9606.ENSP00000356954,9606.ENSP00000358596,9606.ENSP00000360266,9606.ENSP00000365280,9606.ENSP00000391826,9606.ENSP00000398736	GADD45B,HBEGF,DUSP1,EGR1,IER3,RHOB,DUSP6,FOS,TRIB1,CTGF,DUSP5,JUN,ID1,IGF2,CYR61
GO:0001568	blood vessel development	6	464	0.99	0.00028	9606.ENSP00000239938,9606.ENSP00000272233,9606.ENSP00000356954,9606.ENSP00000360266,9606.ENSP00000365280,9606.ENSP00000398736	EGR1,RHOB,CTGF,JUN,ID1,CYR61
GO:0007167	enzyme linked receptor protein signaling pathway	7	698	0.88	0.00028	9606.ENSP00000230990,9606.ENSP00000239938,9606.ENSP00000306245,9606.ENSP00000356954,9606.ENSP00000360266,9606.ENSP00000365280,9606.ENSP00000391826	HBEGF,EGR1,FOS,CTGF,JUN,ID1,IGF2
GO:0014706	striated muscle tissue development	5	271	1.14	0.00028	9606.ENSP00000239938,9606.ENSP00000242480,9606.ENSP00000270162,9606.ENSP00000290551,9606.ENSP00000306245	EGR1,EGR2,SIK1,BTG2,FOS
GO:0048513	animal organ development	13	2926	0.52	0.00028	9606.ENSP00000230990,9606.ENSP00000239938,9606.ENSP00000242480,9606.ENSP00000248071,9606.ENSP00000270162,9606.ENSP00000290551,9606.ENSP00000306245,9606.ENSP00000356954,9606.ENSP00000360266,9606.ENSP00000365280,9606.ENSP00000391826,9606.ENSP00000398736,9606.ENSP00000419923	HBEGF,EGR1,EGR2,KLF2,SIK1,BTG2,FOS,CTGF,JUN,ID1,IGF2,CYR61,KLF6
GO:0050896	response to stimulus	21	7824	0.31	0.00028	9606.ENSP00000215631,9606.ENSP00000230990,9606.ENSP00000239223,9606.ENSP00000239938,9606.ENSP00000242480,9606.ENSP00000245919,9606.ENSP00000248071,9606.ENSP00000270162,9606.ENSP00000272233,9606.ENSP00000279488,9606.ENSP00000290551,9606.ENSP00000306245,9606.ENSP00000312150,9606.ENSP00000356954,9606.ENSP00000358596,9606.ENSP00000360266,9606.ENSP00000365280,9606.ENSP00000391826,9606.ENSP00000398736,…	GADD45B,HBEGF,DUSP1,EGR1,EGR2,FOSB,KLF2,SIK1,RHOB,DUSP6,BTG2,FOS,TRIB1,CTGF,DUSP5,JUN,ID1,IGF2,CYR61,IER2,ZFP36
GO:0051094	positive regulation of developmental process	9	1286	0.72	0.00028	9606.ENSP00000239938,9606.ENSP00000272233,9606.ENSP00000306245,9606.ENSP00000312150,9606.ENSP00000356954,9606.ENSP00000360266,9606.ENSP00000391826,9606.ENSP00000398736,9606.ENSP00000469647	EGR1,RHOB,FOS,TRIB1,CTGF,JUN,IGF2,CYR61,ZFP36
GO:0051592	response to calcium ion	4	129	1.37	0.00028	9606.ENSP00000239223,9606.ENSP00000245919,9606.ENSP00000306245,9606.ENSP00000360266	DUSP1,FOSB,FOS,JUN
GO:0070372	regulation of ERK1 and ERK2 cascade	5	274	1.14	0.00028	9606.ENSP00000239223,9606.ENSP00000279488,9606.ENSP00000356954,9606.ENSP00000360266,9606.ENSP00000398736	DUSP1,DUSP6,CTGF,JUN,CYR61
GO:0009636	response to toxic substance	6	468	0.98	0.00029	9606.ENSP00000239223,9606.ENSP00000239938,9606.ENSP00000248071,9606.ENSP00000272233,9606.ENSP00000306245,9606.ENSP00000360266	DUSP1,EGR1,KLF2,RHOB,FOS,JUN
GO:0010629	negative regulation of gene expression	10	1670	0.65	0.0003	9606.ENSP00000238647,9606.ENSP00000239938,9606.ENSP00000245919,9606.ENSP00000248071,9606.ENSP00000290551,9606.ENSP00000356954,9606.ENSP00000360266,9606.ENSP00000365280,9606.ENSP00000391826,9606.ENSP00000469647	IRF2BPL,EGR1,FOSB,KLF2,BTG2,CTGF,JUN,ID1,IGF2,ZFP36
GO:0071363	cellular response to growth factor stimulus	6	477	0.98	0.00031	9606.ENSP00000239938,9606.ENSP00000306245,9606.ENSP00000356954,9606.ENSP00000360266,9606.ENSP00000365280,9606.ENSP00000469647	EGR1,FOS,CTGF,JUN,ID1,ZFP36
GO:0007517	muscle organ development	5	287	1.12	0.00033	9606.ENSP00000230990,9606.ENSP00000239938,9606.ENSP00000242480,9606.ENSP00000290551,9606.ENSP00000306245	HBEGF,EGR1,EGR2,BTG2,FOS
GO:0032269	negative regulation of cellular protein metabolic process	8	1014	0.77	0.00033	9606.ENSP00000215631,9606.ENSP00000239223,9606.ENSP00000279488,9606.ENSP00000290551,9606.ENSP00000312150,9606.ENSP00000358596,9606.ENSP00000360266,9606.ENSP00000469647	GADD45B,DUSP1,DUSP6,BTG2,TRIB1,DUSP5,JUN,ZFP36
GO:0045595	regulation of cell differentiation	10	1695	0.65	0.00033	9606.ENSP00000270162,9606.ENSP00000279488,9606.ENSP00000306245,9606.ENSP00000312150,9606.ENSP00000356954,9606.ENSP00000360266,9606.ENSP00000365280,9606.ENSP00000391826,9606.ENSP00000398736,9606.ENSP00000469647	SIK1,DUSP6,FOS,TRIB1,CTGF,JUN,ID1,IGF2,CYR61,ZFP36
GO:0051384	response to glucocorticoid	4	138	1.34	0.00033	9606.ENSP00000239223,9606.ENSP00000245919,9606.ENSP00000306245,9606.ENSP00000469647	DUSP1,FOSB,FOS,ZFP36
GO:0071900	regulation of protein serine/threonine kinase activity	6	488	0.97	0.00034	9606.ENSP00000215631,9606.ENSP00000239223,9606.ENSP00000279488,9606.ENSP00000312150,9606.ENSP00000358596,9606.ENSP00000391826	GADD45B,DUSP1,DUSP6,TRIB1,DUSP5,IGF2
GO:0010035	response to inorganic substance	6	491	0.96	0.00035	9606.ENSP00000239223,9606.ENSP00000245919,9606.ENSP00000248071,9606.ENSP00000272233,9606.ENSP00000306245,9606.ENSP00000360266	DUSP1,FOSB,KLF2,RHOB,FOS,JUN
GO:0001525	angiogenesis	5	297	1.1	0.00037	9606.ENSP00000272233,9606.ENSP00000356954,9606.ENSP00000360266,9606.ENSP00000365280,9606.ENSP00000398736	RHOB,CTGF,JUN,ID1,CYR61
GO:0009605	response to external stimulus	11	2152	0.59	0.0004	9606.ENSP00000230990,9606.ENSP00000239938,9606.ENSP00000242480,9606.ENSP00000245919,9606.ENSP00000270162,9606.ENSP00000290551,9606.ENSP00000306245,9606.ENSP00000312150,9606.ENSP00000360266,9606.ENSP00000398736,9606.ENSP00000469647	HBEGF,EGR1,EGR2,FOSB,SIK1,BTG2,FOS,TRIB1,JUN,CYR61,ZFP36
GO:0043410	positive regulation of MAPK cascade	6	512	0.95	0.00042	9606.ENSP00000215631,9606.ENSP00000279488,9606.ENSP00000356954,9606.ENSP00000358596,9606.ENSP00000360266,9606.ENSP00000391826	GADD45B,DUSP6,CTGF,DUSP5,JUN,IGF2
GO:0002763	positive regulation of myeloid leukocyte differentiation	3	52	1.64	0.00044	9606.ENSP00000306245,9606.ENSP00000312150,9606.ENSP00000360266	FOS,TRIB1,JUN
GO:0045860	positive regulation of protein kinase activity	6	517	0.94	0.00044	9606.ENSP00000215631,9606.ENSP00000239938,9606.ENSP00000279488,9606.ENSP00000358596,9606.ENSP00000391826,9606.ENSP00000398736	GADD45B,EGR1,DUSP6,DUSP5,IGF2,CYR61
GO:0000165	MAPK cascade	5	323	1.07	0.00053	9606.ENSP00000230990,9606.ENSP00000279488,9606.ENSP00000312150,9606.ENSP00000358596,9606.ENSP00000469647	HBEGF,DUSP6,TRIB1,DUSP5,ZFP36
GO:0050790	regulation of catalytic activity	11	2249	0.57	0.00058	9606.ENSP00000215631,9606.ENSP00000239223,9606.ENSP00000239938,9606.ENSP00000279488,9606.ENSP00000312150,9606.ENSP00000356954,9606.ENSP00000358596,9606.ENSP00000360266,9606.ENSP00000391826,9606.ENSP00000398736,9606.ENSP00000469647	GADD45B,DUSP1,EGR1,DUSP6,TRIB1,CTGF,DUSP5,JUN,IGF2,CYR61,ZFP36
GO:0072359	circulatory system development	7	807	0.81	0.00058	9606.ENSP00000239938,9606.ENSP00000270162,9606.ENSP00000272233,9606.ENSP00000356954,9606.ENSP00000360266,9606.ENSP00000365280,9606.ENSP00000398736	EGR1,SIK1,RHOB,CTGF,JUN,ID1,CYR61
GO:0043405	regulation of MAP kinase activity	5	337	1.05	0.00063	9606.ENSP00000215631,9606.ENSP00000239223,9606.ENSP00000279488,9606.ENSP00000312150,9606.ENSP00000358596	GADD45B,DUSP1,DUSP6,TRIB1,DUSP5
GO:0051726	regulation of cell cycle	8	1129	0.73	0.00063	9606.ENSP00000215631,9606.ENSP00000239223,9606.ENSP00000270162,9606.ENSP00000272233,9606.ENSP00000290551,9606.ENSP00000356954,9606.ENSP00000360266,9606.ENSP00000391826	GADD45B,DUSP1,SIK1,RHOB,BTG2,CTGF,JUN,IGF2
GO:0033993	response to lipid	7	825	0.81	0.00064	9606.ENSP00000239223,9606.ENSP00000245919,9606.ENSP00000306245,9606.ENSP00000312150,9606.ENSP00000356954,9606.ENSP00000360266,9606.ENSP00000469647	DUSP1,FOSB,FOS,TRIB1,CTGF,JUN,ZFP36
GO:0006807	nitrogen compound metabolic process	21	8349	0.28	0.00067	9606.ENSP00000230990,9606.ENSP00000239223,9606.ENSP00000239938,9606.ENSP00000242480,9606.ENSP00000245919,9606.ENSP00000248071,9606.ENSP00000270162,9606.ENSP00000279488,9606.ENSP00000290551,9606.ENSP00000306245,9606.ENSP00000312150,9606.ENSP00000356954,9606.ENSP00000358596,9606.ENSP00000360266,9606.ENSP00000365280,9606.ENSP00000391826,9606.ENSP00000398736,9606.ENSP00000419923,9606.ENSP00000465617,…	HBEGF,DUSP1,EGR1,EGR2,FOSB,KLF2,SIK1,DUSP6,BTG2,FOS,TRIB1,CTGF,DUSP5,JUN,ID1,IGF2,CYR61,KLF6,IER2,ZFP36,C17orf96
GO:0051716	cellular response to stimulus	18	6212	0.34	0.00078	9606.ENSP00000230990,9606.ENSP00000239223,9606.ENSP00000239938,9606.ENSP00000242480,9606.ENSP00000245919,9606.ENSP00000248071,9606.ENSP00000270162,9606.ENSP00000272233,9606.ENSP00000279488,9606.ENSP00000290551,9606.ENSP00000306245,9606.ENSP00000312150,9606.ENSP00000356954,9606.ENSP00000358596,9606.ENSP00000360266,9606.ENSP00000365280,9606.ENSP00000391826,9606.ENSP00000469647	HBEGF,DUSP1,EGR1,EGR2,FOSB,KLF2,SIK1,RHOB,DUSP6,BTG2,FOS,TRIB1,CTGF,DUSP5,JUN,ID1,IGF2,ZFP36
GO:0071277	cellular response to calcium ion	3	65	1.54	0.00078	9606.ENSP00000245919,9606.ENSP00000306245,9606.ENSP00000360266	FOSB,FOS,JUN
GO:1901654	response to ketone	4	183	1.22	0.0008	9606.ENSP00000239223,9606.ENSP00000245919,9606.ENSP00000248071,9606.ENSP00000306245	DUSP1,FOSB,KLF2,FOS
GO:0043434	response to peptide hormone	5	362	1.02	0.00083	9606.ENSP00000239938,9606.ENSP00000242480,9606.ENSP00000290551,9606.ENSP00000356954,9606.ENSP00000391826	EGR1,EGR2,BTG2,CTGF,IGF2
GO:0043618	regulation of transcription from RNA polymerase II promoter in response to stress	3	67	1.53	0.00083	9606.ENSP00000239938,9606.ENSP00000248071,9606.ENSP00000360266	EGR1,KLF2,JUN
GO:0051240	positive regulation of multicellular organismal process	9	1551	0.64	0.00087	9606.ENSP00000230990,9606.ENSP00000239938,9606.ENSP00000272233,9606.ENSP00000306245,9606.ENSP00000312150,9606.ENSP00000356954,9606.ENSP00000360266,9606.ENSP00000391826,9606.ENSP00000398736	HBEGF,EGR1,RHOB,FOS,TRIB1,CTGF,JUN,IGF2,CYR61
GO:0007178	transmembrane receptor protein serine/threonine kinase signaling pathway	4	189	1.2	0.00088	9606.ENSP00000239938,9606.ENSP00000306245,9606.ENSP00000360266,9606.ENSP00000365280	EGR1,FOS,JUN,ID1
GO:0008284	positive regulation of cell population proliferation	7	878	0.78	0.00088	9606.ENSP00000230990,9606.ENSP00000239938,9606.ENSP00000356954,9606.ENSP00000360266,9606.ENSP00000365280,9606.ENSP00000391826,9606.ENSP00000398736	HBEGF,EGR1,CTGF,JUN,ID1,IGF2,CYR61
GO:0060213	positive regulation of nuclear-transcribed mRNA poly(A) tail shortening	2	11	2.14	0.00098	9606.ENSP00000290551,9606.ENSP00000469647	BTG2,ZFP36
GO:0023052	signaling	16	5108	0.37	0.0011	9606.ENSP00000230990,9606.ENSP00000239223,9606.ENSP00000239938,9606.ENSP00000270162,9606.ENSP00000272233,9606.ENSP00000279488,9606.ENSP00000290551,9606.ENSP00000306245,9606.ENSP00000312150,9606.ENSP00000356954,9606.ENSP00000358596,9606.ENSP00000360266,9606.ENSP00000365280,9606.ENSP00000391826,9606.ENSP00000398736,9606.ENSP00000469647	HBEGF,DUSP1,EGR1,SIK1,RHOB,DUSP6,BTG2,FOS,TRIB1,CTGF,DUSP5,JUN,ID1,IGF2,CYR61,ZFP36
GO:0009612	response to mechanical stimulus	4	210	1.16	0.0012	9606.ENSP00000245919,9606.ENSP00000290551,9606.ENSP00000306245,9606.ENSP00000360266	FOSB,BTG2,FOS,JUN
GO:0051090	regulation of DNA-binding transcription factor activity	5	403	0.97	0.0013	9606.ENSP00000270162,9606.ENSP00000306245,9606.ENSP00000312150,9606.ENSP00000360266,9606.ENSP00000365280	SIK1,FOS,TRIB1,JUN,ID1
GO:0007154	cell communication	16	5219	0.36	0.0014	9606.ENSP00000230990,9606.ENSP00000239223,9606.ENSP00000239938,9606.ENSP00000270162,9606.ENSP00000272233,9606.ENSP00000279488,9606.ENSP00000290551,9606.ENSP00000306245,9606.ENSP00000312150,9606.ENSP00000356954,9606.ENSP00000358596,9606.ENSP00000360266,9606.ENSP00000365280,9606.ENSP00000391826,9606.ENSP00000398736,9606.ENSP00000469647	HBEGF,DUSP1,EGR1,SIK1,RHOB,DUSP6,BTG2,FOS,TRIB1,CTGF,DUSP5,JUN,ID1,IGF2,CYR61,ZFP36
GO:0060548	negative regulation of cell death	7	953	0.74	0.0014	9606.ENSP00000239223,9606.ENSP00000259874,9606.ENSP00000290551,9606.ENSP00000356954,9606.ENSP00000360266,9606.ENSP00000365280,9606.ENSP00000398736	DUSP1,IER3,BTG2,CTGF,JUN,ID1,CYR61
GO:1902533	positive regulation of intracellular signal transduction	7	959	0.74	0.0014	9606.ENSP00000215631,9606.ENSP00000230990,9606.ENSP00000279488,9606.ENSP00000356954,9606.ENSP00000358596,9606.ENSP00000360266,9606.ENSP00000391826	GADD45B,HBEGF,DUSP6,CTGF,DUSP5,JUN,IGF2
GO:0044238	primary metabolic process	21	8808	0.25	0.0015	9606.ENSP00000230990,9606.ENSP00000239223,9606.ENSP00000239938,9606.ENSP00000242480,9606.ENSP00000245919,9606.ENSP00000248071,9606.ENSP00000270162,9606.ENSP00000279488,9606.ENSP00000290551,9606.ENSP00000306245,9606.ENSP00000312150,9606.ENSP00000356954,9606.ENSP00000358596,9606.ENSP00000360266,9606.ENSP00000365280,9606.ENSP00000391826,9606.ENSP00000398736,9606.ENSP00000419923,9606.ENSP00000465617,…	HBEGF,DUSP1,EGR1,EGR2,FOSB,KLF2,SIK1,DUSP6,BTG2,FOS,TRIB1,CTGF,DUSP5,JUN,ID1,IGF2,CYR61,KLF6,IER2,ZFP36,C17orf96
GO:1901216	positive regulation of neuron death	3	85	1.42	0.0015	9606.ENSP00000239938,9606.ENSP00000306245,9606.ENSP00000360266	EGR1,FOS,JUN
GO:0006351	transcription, DNA-templated	11	2569	0.51	0.0016	9606.ENSP00000239938,9606.ENSP00000242480,9606.ENSP00000245919,9606.ENSP00000248071,9606.ENSP00000290551,9606.ENSP00000306245,9606.ENSP00000356954,9606.ENSP00000360266,9606.ENSP00000365280,9606.ENSP00000419923,9606.ENSP00000465617	EGR1,EGR2,FOSB,KLF2,BTG2,FOS,CTGF,JUN,ID1,KLF6,IER2
GO:0007179	transforming growth factor beta receptor signaling pathway	3	88	1.41	0.0016	9606.ENSP00000306245,9606.ENSP00000360266,9606.ENSP00000365280	FOS,JUN,ID1
GO:0035970	peptidyl-threonine dephosphorylation	2	16	1.97	0.0017	9606.ENSP00000239223,9606.ENSP00000358596	DUSP1,DUSP5
GO:0007165	signal transduction	15	4738	0.38	0.0018	9606.ENSP00000230990,9606.ENSP00000239223,9606.ENSP00000239938,9606.ENSP00000270162,9606.ENSP00000272233,9606.ENSP00000279488,9606.ENSP00000290551,9606.ENSP00000306245,9606.ENSP00000312150,9606.ENSP00000356954,9606.ENSP00000358596,9606.ENSP00000360266,9606.ENSP00000365280,9606.ENSP00000391826,9606.ENSP00000469647	HBEGF,DUSP1,EGR1,SIK1,RHOB,DUSP6,BTG2,FOS,TRIB1,CTGF,DUSP5,JUN,ID1,IGF2,ZFP36
GO:0007611	learning or memory	4	237	1.1	0.0018	9606.ENSP00000242480,9606.ENSP00000290551,9606.ENSP00000306245,9606.ENSP00000360266	EGR2,BTG2,FOS,JUN
GO:0043085	positive regulation of catalytic activity	8	1381	0.64	0.002	9606.ENSP00000215631,9606.ENSP00000239938,9606.ENSP00000279488,9606.ENSP00000356954,9606.ENSP00000358596,9606.ENSP00000360266,9606.ENSP00000391826,9606.ENSP00000398736	GADD45B,EGR1,DUSP6,CTGF,DUSP5,JUN,IGF2,CYR61
GO:0035994	response to muscle stretch	2	18	1.92	0.0021	9606.ENSP00000306245,9606.ENSP00000360266	FOS,JUN
GO:0045637	regulation of myeloid cell differentiation	4	249	1.08	0.0021	9606.ENSP00000306245,9606.ENSP00000312150,9606.ENSP00000360266,9606.ENSP00000469647	FOS,TRIB1,JUN,ZFP36
GO:0051412	response to corticosterone	2	18	1.92	0.0021	9606.ENSP00000245919,9606.ENSP00000306245	FOSB,FOS
GO:0035335	peptidyl-tyrosine dephosphorylation	3	100	1.35	0.0022	9606.ENSP00000239223,9606.ENSP00000279488,9606.ENSP00000358596	DUSP1,DUSP6,DUSP5
GO:0043412	macromolecule modification	12	3197	0.45	0.0024	9606.ENSP00000230990,9606.ENSP00000239223,9606.ENSP00000242480,9606.ENSP00000270162,9606.ENSP00000279488,9606.ENSP00000290551,9606.ENSP00000306245,9606.ENSP00000312150,9606.ENSP00000358596,9606.ENSP00000398736,9606.ENSP00000469647,9606.ENSP00000484710	HBEGF,DUSP1,EGR2,SIK1,DUSP6,BTG2,FOS,TRIB1,DUSP5,CYR61,ZFP36,C17orf96
GO:0071236	cellular response to antibiotic	3	112	1.3	0.003	9606.ENSP00000239938,9606.ENSP00000248071,9606.ENSP00000272233	EGR1,KLF2,RHOB
GO:0035295	tube development	6	793	0.76	0.0032	9606.ENSP00000248071,9606.ENSP00000272233,9606.ENSP00000356954,9606.ENSP00000360266,9606.ENSP00000365280,9606.ENSP00000398736	KLF2,RHOB,CTGF,JUN,ID1,CYR61
GO:0071774	response to fibroblast growth factor	3	115	1.29	0.0032	9606.ENSP00000356954,9606.ENSP00000465617,9606.ENSP00000469647	CTGF,IER2,ZFP36
GO:0009967	positive regulation of signal transduction	8	1493	0.61	0.0033	9606.ENSP00000215631,9606.ENSP00000230990,9606.ENSP00000279488,9606.ENSP00000356954,9606.ENSP00000358596,9606.ENSP00000360266,9606.ENSP00000391826,9606.ENSP00000398736	GADD45B,HBEGF,DUSP6,CTGF,DUSP5,JUN,IGF2,CYR61
GO:0032897	negative regulation of viral transcription	2	24	1.8	0.0034	9606.ENSP00000360266,9606.ENSP00000469647	JUN,ZFP36
GO:0044319	wound healing, spreading of cells	2	24	1.8	0.0034	9606.ENSP00000230990,9606.ENSP00000398736	HBEGF,CYR61
GO:0060669	embryonic placenta morphogenesis	2	24	1.8	0.0034	9606.ENSP00000391826,9606.ENSP00000398736	IGF2,CYR61
GO:1901214	regulation of neuron death	4	288	1.02	0.0034	9606.ENSP00000239938,9606.ENSP00000290551,9606.ENSP00000306245,9606.ENSP00000360266	EGR1,BTG2,FOS,JUN
GO:1902895	positive regulation of pri-miRNA transcription by RNA polymerase II	2	25	1.78	0.0035	9606.ENSP00000306245,9606.ENSP00000360266	FOS,JUN
GO:0032496	response to lipopolysaccharide	4	298	1	0.0038	9606.ENSP00000306245,9606.ENSP00000312150,9606.ENSP00000360266,9606.ENSP00000469647	FOS,TRIB1,JUN,ZFP36
GO:0048660	regulation of smooth muscle cell proliferation	3	126	1.25	0.0039	9606.ENSP00000230990,9606.ENSP00000312150,9606.ENSP00000360266	HBEGF,TRIB1,JUN
GO:0033554	cellular response to stress	8	1553	0.59	0.004	9606.ENSP00000239938,9606.ENSP00000248071,9606.ENSP00000272233,9606.ENSP00000290551,9606.ENSP00000306245,9606.ENSP00000312150,9606.ENSP00000360266,9606.ENSP00000469647	EGR1,KLF2,RHOB,BTG2,FOS,TRIB1,JUN,ZFP36
GO:0009611	response to wounding	5	547	0.84	0.0041	9606.ENSP00000230990,9606.ENSP00000356954,9606.ENSP00000360266,9606.ENSP00000398736,9606.ENSP00000469647	HBEGF,CTGF,JUN,CYR61,ZFP36
GO:1901342	regulation of vasculature development	4	305	0.99	0.0041	9606.ENSP00000239938,9606.ENSP00000248071,9606.ENSP00000272233,9606.ENSP00000365280	EGR1,KLF2,RHOB,ID1
GO:0016070	RNA metabolic process	12	3430	0.42	0.0042	9606.ENSP00000239938,9606.ENSP00000242480,9606.ENSP00000245919,9606.ENSP00000248071,9606.ENSP00000290551,9606.ENSP00000306245,9606.ENSP00000356954,9606.ENSP00000360266,9606.ENSP00000365280,9606.ENSP00000419923,9606.ENSP00000465617,9606.ENSP00000469647	EGR1,EGR2,FOSB,KLF2,BTG2,FOS,CTGF,JUN,ID1,KLF6,IER2,ZFP36
GO:0035690	cellular response to drug	4	310	0.99	0.0043	9606.ENSP00000239938,9606.ENSP00000248071,9606.ENSP00000272233,9606.ENSP00000365280	EGR1,KLF2,RHOB,ID1
GO:0010634	positive regulation of epithelial cell migration	3	136	1.22	0.0046	9606.ENSP00000230990,9606.ENSP00000272233,9606.ENSP00000360266	HBEGF,RHOB,JUN
GO:0043066	negative regulation of apoptotic process	6	859	0.72	0.0046	9606.ENSP00000239223,9606.ENSP00000259874,9606.ENSP00000290551,9606.ENSP00000360266,9606.ENSP00000365280,9606.ENSP00000398736	DUSP1,IER3,BTG2,JUN,ID1,CYR61
GO:0007612	learning	3	137	1.22	0.0047	9606.ENSP00000290551,9606.ENSP00000306245,9606.ENSP00000360266	BTG2,FOS,JUN
GO:0001101	response to acid chemical	4	323	0.97	0.0049	9606.ENSP00000239223,9606.ENSP00000239938,9606.ENSP00000248071,9606.ENSP00000356954	DUSP1,EGR1,KLF2,CTGF
GO:0071276	cellular response to cadmium ion	2	31	1.69	0.0049	9606.ENSP00000306245,9606.ENSP00000360266	FOS,JUN
GO:0006464	cellular protein modification process	11	2999	0.44	0.005	9606.ENSP00000230990,9606.ENSP00000239223,9606.ENSP00000242480,9606.ENSP00000270162,9606.ENSP00000279488,9606.ENSP00000290551,9606.ENSP00000312150,9606.ENSP00000358596,9606.ENSP00000398736,9606.ENSP00000469647,9606.ENSP00000484710	HBEGF,DUSP1,EGR2,SIK1,DUSP6,BTG2,TRIB1,DUSP5,CYR61,ZFP36,C17orf96
GO:0071902	positive regulation of protein serine/threonine kinase activity	4	340	0.95	0.0056	9606.ENSP00000215631,9606.ENSP00000279488,9606.ENSP00000358596,9606.ENSP00000391826	GADD45B,DUSP6,DUSP5,IGF2
GO:0045597	positive regulation of cell differentiation	6	908	0.7	0.0057	9606.ENSP00000306245,9606.ENSP00000312150,9606.ENSP00000356954,9606.ENSP00000360266,9606.ENSP00000398736,9606.ENSP00000469647	FOS,TRIB1,CTGF,JUN,CYR61,ZFP36
GO:0032147	activation of protein kinase activity	4	347	0.94	0.0059	9606.ENSP00000215631,9606.ENSP00000279488,9606.ENSP00000358596,9606.ENSP00000391826	GADD45B,DUSP6,DUSP5,IGF2
GO:0044267	cellular protein metabolic process	12	3603	0.4	0.006	9606.ENSP00000230990,9606.ENSP00000239223,9606.ENSP00000242480,9606.ENSP00000270162,9606.ENSP00000279488,9606.ENSP00000290551,9606.ENSP00000312150,9606.ENSP00000358596,9606.ENSP00000391826,9606.ENSP00000398736,9606.ENSP00000469647,9606.ENSP00000484710	HBEGF,DUSP1,EGR2,SIK1,DUSP6,BTG2,TRIB1,DUSP5,IGF2,CYR61,ZFP36,C17orf96
GO:0006468	protein phosphorylation	6	923	0.69	0.0061	9606.ENSP00000230990,9606.ENSP00000270162,9606.ENSP00000279488,9606.ENSP00000312150,9606.ENSP00000358596,9606.ENSP00000469647	HBEGF,SIK1,DUSP6,TRIB1,DUSP5,ZFP36
GO:0032570	response to progesterone	2	36	1.62	0.0061	9606.ENSP00000245919,9606.ENSP00000306245	FOSB,FOS
GO:0043433	negative regulation of DNA-binding transcription factor activity	3	157	1.16	0.0063	9606.ENSP00000270162,9606.ENSP00000312150,9606.ENSP00000365280	SIK1,TRIB1,ID1
GO:0030182	neuron differentiation	6	940	0.68	0.0065	9606.ENSP00000242480,9606.ENSP00000290551,9606.ENSP00000360266,9606.ENSP00000365280,9606.ENSP00000465617,9606.ENSP00000484710	EGR2,BTG2,JUN,ID1,IER2,C17orf96
GO:0030324	lung development	3	162	1.14	0.0068	9606.ENSP00000248071,9606.ENSP00000356954,9606.ENSP00000365280	KLF2,CTGF,ID1
GO:0071364	cellular response to epidermal growth factor stimulus	2	40	1.58	0.0072	9606.ENSP00000365280,9606.ENSP00000469647	ID1,ZFP36
GO:0046890	regulation of lipid biosynthetic process	3	174	1.11	0.0082	9606.ENSP00000239938,9606.ENSP00000270162,9606.ENSP00000398736	EGR1,SIK1,CYR61
GO:0040008	regulation of growth	5	663	0.75	0.0083	9606.ENSP00000230990,9606.ENSP00000279488,9606.ENSP00000356954,9606.ENSP00000391826,9606.ENSP00000398736	HBEGF,DUSP6,CTGF,IGF2,CYR61
GO:0030278	regulation of ossification	3	181	1.1	0.0089	9606.ENSP00000242480,9606.ENSP00000365280,9606.ENSP00000398736	EGR2,ID1,CYR61
GO:0061448	connective tissue development	3	194	1.07	0.0107	9606.ENSP00000239938,9606.ENSP00000356954,9606.ENSP00000398736	EGR1,CTGF,CYR61
GO:0060429	epithelium development	6	1055	0.63	0.0108	9606.ENSP00000230990,9606.ENSP00000248071,9606.ENSP00000272233,9606.ENSP00000360266,9606.ENSP00000365280,9606.ENSP00000398736	HBEGF,KLF2,RHOB,JUN,ID1,CYR61
GO:0097237	cellular response to toxic substance	3	195	1.06	0.0108	9606.ENSP00000239938,9606.ENSP00000248071,9606.ENSP00000272233	EGR1,KLF2,RHOB
GO:0001706	endoderm formation	2	52	1.46	0.0111	9606.ENSP00000239223,9606.ENSP00000358596	DUSP1,DUSP5
GO:0043392	negative regulation of DNA binding	2	52	1.46	0.0111	9606.ENSP00000360266,9606.ENSP00000365280	JUN,ID1
GO:0006139	nucleobase-containing compound metabolic process	13	4551	0.33	0.0127	9606.ENSP00000239938,9606.ENSP00000242480,9606.ENSP00000245919,9606.ENSP00000248071,9606.ENSP00000290551,9606.ENSP00000306245,9606.ENSP00000356954,9606.ENSP00000360266,9606.ENSP00000365280,9606.ENSP00000391826,9606.ENSP00000419923,9606.ENSP00000465617,9606.ENSP00000469647	EGR1,EGR2,FOSB,KLF2,BTG2,FOS,CTGF,JUN,ID1,IGF2,KLF6,IER2,ZFP36
GO:0043901	negative regulation of multi-organism process	3	212	1.03	0.0132	9606.ENSP00000312150,9606.ENSP00000360266,9606.ENSP00000469647	TRIB1,JUN,ZFP36
GO:0030334	regulation of cell migration	5	753	0.7	0.0134	9606.ENSP00000230990,9606.ENSP00000272233,9606.ENSP00000312150,9606.ENSP00000360266,9606.ENSP00000398736	HBEGF,RHOB,TRIB1,JUN,CYR61
GO:0030335	positive regulation of cell migration	4	452	0.82	0.0134	9606.ENSP00000230990,9606.ENSP00000272233,9606.ENSP00000360266,9606.ENSP00000398736	HBEGF,RHOB,JUN,CYR61
GO:0032868	response to insulin	3	213	1.03	0.0134	9606.ENSP00000239938,9606.ENSP00000242480,9606.ENSP00000391826	EGR1,EGR2,IGF2
GO:0060395	SMAD protein signal transduction	2	58	1.41	0.0134	9606.ENSP00000306245,9606.ENSP00000360266	FOS,JUN
GO:0001503	ossification	3	215	1.02	0.0135	9606.ENSP00000356954,9606.ENSP00000391826,9606.ENSP00000398736	CTGF,IGF2,CYR61
GO:0032233	positive regulation of actin filament bundle assembly	2	60	1.4	0.0141	9606.ENSP00000356954,9606.ENSP00000365280	CTGF,ID1
GO:0061035	regulation of cartilage development	2	63	1.38	0.0153	9606.ENSP00000356954,9606.ENSP00000398736	CTGF,CYR61
GO:0040011	locomotion	6	1144	0.6	0.0154	9606.ENSP00000230990,9606.ENSP00000242480,9606.ENSP00000356954,9606.ENSP00000365280,9606.ENSP00000398736,9606.ENSP00000465617	HBEGF,EGR2,CTGF,ID1,CYR61,IER2
GO:0038095	Fc-epsilon receptor signaling pathway	2	64	1.37	0.0156	9606.ENSP00000306245,9606.ENSP00000360266	FOS,JUN
GO:0070301	cellular response to hydrogen peroxide	2	64	1.37	0.0156	9606.ENSP00000248071,9606.ENSP00000272233	KLF2,RHOB
GO:0071479	cellular response to ionizing radiation	2	64	1.37	0.0156	9606.ENSP00000239938,9606.ENSP00000272233	EGR1,RHOB
GO:0070373	negative regulation of ERK1 and ERK2 cascade	2	65	1.36	0.0159	9606.ENSP00000239223,9606.ENSP00000279488	DUSP1,DUSP6
GO:0097305	response to alcohol	3	233	0.99	0.0163	9606.ENSP00000245919,9606.ENSP00000248071,9606.ENSP00000306245	FOSB,KLF2,FOS
GO:0007507	heart development	4	485	0.79	0.0164	9606.ENSP00000270162,9606.ENSP00000360266,9606.ENSP00000365280,9606.ENSP00000398736	SIK1,JUN,ID1,CYR61
GO:0071417	cellular response to organonitrogen compound	4	485	0.79	0.0164	9606.ENSP00000239938,9606.ENSP00000248071,9606.ENSP00000365280,9606.ENSP00000391826	EGR1,KLF2,ID1,IGF2
GO:0071407	cellular response to organic cyclic compound	4	505	0.78	0.0184	9606.ENSP00000239938,9606.ENSP00000248071,9606.ENSP00000365280,9606.ENSP00000469647	EGR1,KLF2,ID1,ZFP36
GO:0040029	regulation of gene expression, epigenetic	3	251	0.95	0.0193	9606.ENSP00000248071,9606.ENSP00000391826,9606.ENSP00000469647	KLF2,IGF2,ZFP36
GO:0008306	associative learning	2	75	1.3	0.0199	9606.ENSP00000290551,9606.ENSP00000306245	BTG2,FOS
GO:0007568	aging	3	255	0.95	0.02	9606.ENSP00000306245,9606.ENSP00000356954,9606.ENSP00000360266	FOS,CTGF,JUN
GO:0030097	hemopoiesis	4	526	0.76	0.0209	9606.ENSP00000239938,9606.ENSP00000248071,9606.ENSP00000360266,9606.ENSP00000419923	EGR1,KLF2,JUN,KLF6
GO:0009887	animal organ morphogenesis	5	865	0.64	0.0217	9606.ENSP00000356954,9606.ENSP00000360266,9606.ENSP00000365280,9606.ENSP00000391826,9606.ENSP00000398736	CTGF,JUN,ID1,IGF2,CYR61
GO:0043406	positive regulation of MAP kinase activity	3	264	0.93	0.0217	9606.ENSP00000215631,9606.ENSP00000279488,9606.ENSP00000358596	GADD45B,DUSP6,DUSP5
GO:0048661	positive regulation of smooth muscle cell proliferation	2	80	1.27	0.022	9606.ENSP00000230990,9606.ENSP00000360266	HBEGF,JUN
GO:0048598	embryonic morphogenesis	4	545	0.74	0.023	9606.ENSP00000239223,9606.ENSP00000358596,9606.ENSP00000391826,9606.ENSP00000398736	DUSP1,DUSP5,IGF2,CYR61
GO:0001649	osteoblast differentiation	2	83	1.26	0.0232	9606.ENSP00000391826,9606.ENSP00000398736	IGF2,CYR61
GO:0043255	regulation of carbohydrate biosynthetic process	2	83	1.26	0.0232	9606.ENSP00000270162,9606.ENSP00000391826	SIK1,IGF2
GO:0090068	positive regulation of cell cycle process	3	273	0.92	0.0232	9606.ENSP00000290551,9606.ENSP00000356954,9606.ENSP00000391826	BTG2,CTGF,IGF2
GO:0009790	embryo development	5	890	0.63	0.0236	9606.ENSP00000239223,9606.ENSP00000248071,9606.ENSP00000358596,9606.ENSP00000391826,9606.ENSP00000398736	DUSP1,KLF2,DUSP5,IGF2,CYR61
GO:0045765	regulation of angiogenesis	3	277	0.91	0.0239	9606.ENSP00000248071,9606.ENSP00000272233,9606.ENSP00000365280	KLF2,RHOB,ID1
GO:0003158	endothelium development	2	86	1.24	0.0243	9606.ENSP00000272233,9606.ENSP00000365280	RHOB,ID1
GO:0006915	apoptotic process	5	915	0.61	0.0257	9606.ENSP00000215631,9606.ENSP00000259874,9606.ENSP00000272233,9606.ENSP00000360266,9606.ENSP00000398736	GADD45B,IER3,RHOB,JUN,CYR61
GO:0048870	cell motility	5	914	0.61	0.0257	9606.ENSP00000230990,9606.ENSP00000356954,9606.ENSP00000365280,9606.ENSP00000398736,9606.ENSP00000465617	HBEGF,CTGF,ID1,CYR61,IER2
GO:1901653	cellular response to peptide	3	289	0.89	0.026	9606.ENSP00000248071,9606.ENSP00000365280,9606.ENSP00000391826	KLF2,ID1,IGF2
GO:0009416	response to light stimulus	3	290	0.89	0.0261	9606.ENSP00000239223,9606.ENSP00000270162,9606.ENSP00000306245	DUSP1,SIK1,FOS
GO:0030509	BMP signaling pathway	2	92	1.21	0.0268	9606.ENSP00000239938,9606.ENSP00000365280	EGR1,ID1
GO:0045638	negative regulation of myeloid cell differentiation	2	93	1.21	0.0272	9606.ENSP00000312150,9606.ENSP00000469647	TRIB1,ZFP36
GO:0042035	regulation of cytokine biosynthetic process	2	96	1.2	0.0288	9606.ENSP00000239938,9606.ENSP00000469647	EGR1,ZFP36
GO:0022414	reproductive process	6	1350	0.52	0.029	9606.ENSP00000238647,9606.ENSP00000239938,9606.ENSP00000245919,9606.ENSP00000306245,9606.ENSP00000391826,9606.ENSP00000398736	IRF2BPL,EGR1,FOSB,FOS,IGF2,CYR61
GO:0006928	movement of cell or subcellular component	6	1355	0.52	0.0294	9606.ENSP00000230990,9606.ENSP00000242480,9606.ENSP00000356954,9606.ENSP00000365280,9606.ENSP00000398736,9606.ENSP00000465617	HBEGF,EGR2,CTGF,ID1,CYR61,IER2
GO:0001701	in utero embryonic development	3	306	0.87	0.0295	9606.ENSP00000248071,9606.ENSP00000391826,9606.ENSP00000398736	KLF2,IGF2,CYR61
GO:0010906	regulation of glucose metabolic process	2	100	1.18	0.0305	9606.ENSP00000270162,9606.ENSP00000391826	SIK1,IGF2
GO:0050678	regulation of epithelial cell proliferation	3	311	0.86	0.0305	9606.ENSP00000360266,9606.ENSP00000365280,9606.ENSP00000469647	JUN,ID1,ZFP36
GO:0007346	regulation of mitotic cell cycle	4	608	0.69	0.0308	9606.ENSP00000239223,9606.ENSP00000270162,9606.ENSP00000290551,9606.ENSP00000391826	DUSP1,SIK1,BTG2,IGF2
GO:0002521	leukocyte differentiation	3	313	0.86	0.0309	9606.ENSP00000239938,9606.ENSP00000360266,9606.ENSP00000419923	EGR1,JUN,KLF6
GO:0003002	regionalization	3	313	0.86	0.0309	9606.ENSP00000242480,9606.ENSP00000279488,9606.ENSP00000290551	EGR2,DUSP6,BTG2
GO:0072593	reactive oxygen species metabolic process	2	103	1.16	0.0318	9606.ENSP00000356954,9606.ENSP00000398736	CTGF,CYR61
GO:0051403	stress-activated MAPK cascade	2	107	1.15	0.0341	9606.ENSP00000312150,9606.ENSP00000469647	TRIB1,ZFP36
GO:0044344	cellular response to fibroblast growth factor stimulus	2	108	1.14	0.0344	9606.ENSP00000356954,9606.ENSP00000469647	CTGF,ZFP36
GO:0062012	regulation of small molecule metabolic process	3	332	0.83	0.0356	9606.ENSP00000239938,9606.ENSP00000270162,9606.ENSP00000391826	EGR1,SIK1,IGF2
GO:0045667	regulation of osteoblast differentiation	2	112	1.13	0.0366	9606.ENSP00000365280,9606.ENSP00000398736	ID1,CYR61
GO:0031331	positive regulation of cellular catabolic process	3	343	0.82	0.0384	9606.ENSP00000290551,9606.ENSP00000312150,9606.ENSP00000469647	BTG2,TRIB1,ZFP36
GO:0017148	negative regulation of translation	2	117	1.11	0.0393	9606.ENSP00000290551,9606.ENSP00000469647	BTG2,ZFP36
GO:0034097	response to cytokine	5	1035	0.56	0.0393	9606.ENSP00000239938,9606.ENSP00000248071,9606.ENSP00000306245,9606.ENSP00000360266,9606.ENSP00000469647	EGR1,KLF2,FOS,JUN,ZFP36
GO:0045862	positive regulation of proteolysis	3	347	0.81	0.0393	9606.ENSP00000312150,9606.ENSP00000356954,9606.ENSP00000398736	TRIB1,CTGF,CYR61
GO:0008285	negative regulation of cell population proliferation	4	669	0.65	0.0407	9606.ENSP00000239223,9606.ENSP00000290551,9606.ENSP00000312150,9606.ENSP00000360266	DUSP1,BTG2,TRIB1,JUN
GO:0060359	response to ammonium ion	2	122	1.09	0.042	9606.ENSP00000245919,9606.ENSP00000365280	FOSB,ID1
GO:0043280	positive regulation of cysteine-type endopeptidase activity involved in apoptotic process	2	123	1.09	0.0425	9606.ENSP00000356954,9606.ENSP00000398736	CTGF,CYR61
GO:0071347	cellular response to interleukin-1	2	124	1.08	0.0431	9606.ENSP00000239938,9606.ENSP00000248071	EGR1,KLF2
GO:0010564	regulation of cell cycle process	4	684	0.64	0.0434	9606.ENSP00000239223,9606.ENSP00000290551,9606.ENSP00000356954,9606.ENSP00000391826	DUSP1,BTG2,CTGF,IGF2
GO:0032355	response to estradiol	2	126	1.08	0.0442	9606.ENSP00000239223,9606.ENSP00000356954	DUSP1,CTGF
GO:0046330	positive regulation of JNK cascade	2	126	1.08	0.0442	9606.ENSP00000215631,9606.ENSP00000356954	GADD45B,CTGF
GO:0009749	response to glucose	2	133	1.05	0.0479	9606.ENSP00000239938,9606.ENSP00000356954	EGR1,CTGF
GO:0034248	regulation of cellular amide metabolic process	3	379	0.78	0.0479	9606.ENSP00000290551,9606.ENSP00000398736,9606.ENSP00000469647	BTG2,CYR61,ZFP36

## Sheet: Cntrl_vs_Crypto_72h_KEGG_Up
Supplementary table S7: Results from the Gene Ontology (GO) analysis in the category for biological process complete (GObp) and Pathway Enrichment (KEGG pathways) in Cryptosporidium parvum infected cells at 72 hpi.
#term ID	term description	observed gene count	background gene count	strength	false discovery rate	matching proteins in your network (IDs)	matching proteins in your network (labels)
hsa04010	MAPK signaling pathway	7	293	1.25	7.83e-06	9606.ENSP00000215631,9606.ENSP00000239223,9606.ENSP00000279488,9606.ENSP00000306245,9606.ENSP00000358596,9606.ENSP00000360266,9606.ENSP00000391826	GADD45B,DUSP1,DUSP6,FOS,DUSP5,JUN,IGF2
hsa05166	HTLV-I infection	5	250	1.18	0.00078	9606.ENSP00000239938,9606.ENSP00000242480,9606.ENSP00000306245,9606.ENSP00000360266,9606.ENSP00000469647	EGR1,EGR2,FOS,JUN,ZFP36
hsa05418	Fluid shear stress and atherosclerosis	4	133	1.35	0.00084	9606.ENSP00000239223,9606.ENSP00000248071,9606.ENSP00000306245,9606.ENSP00000360266	DUSP1,KLF2,FOS,JUN
hsa05031	Amphetamine addiction	3	65	1.54	0.002	9606.ENSP00000245919,9606.ENSP00000306245,9606.ENSP00000360266	FOSB,FOS,JUN
hsa05210	Colorectal cancer	3	85	1.42	0.0035	9606.ENSP00000215631,9606.ENSP00000306245,9606.ENSP00000360266	GADD45B,FOS,JUN
hsa01522	Endocrine resistance	3	95	1.38	0.0037	9606.ENSP00000230990,9606.ENSP00000306245,9606.ENSP00000360266	HBEGF,FOS,JUN
hsa04657	IL-17 signaling pathway	3	92	1.39	0.0037	9606.ENSP00000245919,9606.ENSP00000306245,9606.ENSP00000360266	FOSB,FOS,JUN
hsa04380	Osteoclast differentiation	3	124	1.26	0.0064	9606.ENSP00000245919,9606.ENSP00000306245,9606.ENSP00000360266	FOSB,FOS,JUN
hsa04210	Apoptosis	3	135	1.22	0.007	9606.ENSP00000215631,9606.ENSP00000306245,9606.ENSP00000360266	GADD45B,FOS,JUN
hsa04371	Apelin signaling pathway	3	133	1.23	0.007	9606.ENSP00000239938,9606.ENSP00000248071,9606.ENSP00000356954	EGR1,KLF2,CTGF
hsa04915	Estrogen signaling pathway	3	133	1.23	0.007	9606.ENSP00000230990,9606.ENSP00000306245,9606.ENSP00000360266	HBEGF,FOS,JUN
hsa05161	Hepatitis B	3	142	1.2	0.007	9606.ENSP00000242480,9606.ENSP00000306245,9606.ENSP00000360266	EGR2,FOS,JUN
hsa05224	Breast cancer	3	147	1.19	0.007	9606.ENSP00000215631,9606.ENSP00000306245,9606.ENSP00000360266	GADD45B,FOS,JUN
hsa05167	Kaposi's sarcoma-associated herpesvirus infection	3	183	1.09	0.011	9606.ENSP00000306245,9606.ENSP00000360266,9606.ENSP00000469647	FOS,JUN,ZFP36
hsa05030	Cocaine addiction	2	49	1.49	0.0115	9606.ENSP00000245919,9606.ENSP00000360266	FOSB,JUN
hsa05120	Epithelial cell signaling in Helicobacter pylori infection	2	66	1.36	0.019	9606.ENSP00000230990,9606.ENSP00000360266	HBEGF,JUN
hsa04662	B cell receptor signaling pathway	2	71	1.33	0.02	9606.ENSP00000306245,9606.ENSP00000360266	FOS,JUN
hsa05133	Pertussis	2	74	1.31	0.02	9606.ENSP00000306245,9606.ENSP00000360266	FOS,JUN
hsa05140	Leishmaniasis	2	70	1.33	0.02	9606.ENSP00000306245,9606.ENSP00000360266	FOS,JUN
hsa05200	Pathways in cancer	4	515	0.77	0.02	9606.ENSP00000215631,9606.ENSP00000306245,9606.ENSP00000360266,9606.ENSP00000391826	GADD45B,FOS,JUN,IGF2
hsa04012	ErbB signaling pathway	2	83	1.26	0.0223	9606.ENSP00000230990,9606.ENSP00000360266	HBEGF,JUN
hsa04658	Th1 and Th2 cell differentiation	2	88	1.23	0.0223	9606.ENSP00000306245,9606.ENSP00000360266	FOS,JUN
hsa04912	GnRH signaling pathway	2	88	1.23	0.0223	9606.ENSP00000230990,9606.ENSP00000360266	HBEGF,JUN
hsa05132	Salmonella infection	2	84	1.25	0.0223	9606.ENSP00000306245,9606.ENSP00000360266	FOS,JUN
hsa05323	Rheumatoid arthritis	2	84	1.25	0.0223	9606.ENSP00000306245,9606.ENSP00000360266	FOS,JUN
hsa04620	Toll-like receptor signaling pathway	2	102	1.17	0.0247	9606.ENSP00000306245,9606.ENSP00000360266	FOS,JUN
hsa04659	Th17 cell differentiation	2	102	1.17	0.0247	9606.ENSP00000306245,9606.ENSP00000360266	FOS,JUN
hsa04660	T cell receptor signaling pathway	2	99	1.18	0.0247	9606.ENSP00000306245,9606.ENSP00000360266	FOS,JUN
hsa04668	TNF signaling pathway	2	108	1.14	0.0247	9606.ENSP00000306245,9606.ENSP00000360266	FOS,JUN
hsa04933	AGE-RAGE signaling pathway in diabetic complications	2	98	1.19	0.0247	9606.ENSP00000239938,9606.ENSP00000360266	EGR1,JUN
hsa05142	Chagas disease (American trypanosomiasis)	2	101	1.17	0.0247	9606.ENSP00000306245,9606.ENSP00000360266	FOS,JUN
hsa05231	Choline metabolism in cancer	2	98	1.19	0.0247	9606.ENSP00000306245,9606.ENSP00000360266	FOS,JUN
hsa04068	FoxO signaling pathway	2	130	1.06	0.0331	9606.ENSP00000215631,9606.ENSP00000248071	GADD45B,KLF2
hsa04926	Relaxin signaling pathway	2	130	1.06	0.0331	9606.ENSP00000306245,9606.ENSP00000360266	FOS,JUN
hsa04921	Oxytocin signaling pathway	2	149	1	0.0403	9606.ENSP00000306245,9606.ENSP00000360266	FOS,JUN
hsa04390	Hippo signaling pathway	2	152	1	0.0407	9606.ENSP00000356954,9606.ENSP00000365280	CTGF,ID1
hsa05225	Hepatocellular carcinoma	2	163	0.97	0.045	9606.ENSP00000215631,9606.ENSP00000391826	GADD45B,IGF2
hsa05202	Transcriptional misregulation in cancer	2	169	0.95	0.0469	9606.ENSP00000215631,9606.ENSP00000279488	GADD45B,DUSP6

## Sheet: Cntrl_vs_Crypto_72h_Bio_Down
Supplementary table S7: Results from the Gene Ontology (GO) analysis in the category for biological process complete (GObp) and Pathway Enrichment (KEGG pathways) in Cryptosporidium parvum infected cells at 72 hpi.
#term ID	term description	observed gene count	background gene count	strength	false discovery rate	matching proteins in your network (IDs)	matching proteins in your network (labels)
GO:0006334	nucleosome assembly	4	137	1.43	0.0093	9606.ENSP00000244534,9606.ENSP00000330074,9606.ENSP00000379911,9606.ENSP00000484841	HIST1H1D,HIST1H1B,CENPK,HIST1H3B
GO:0019219	regulation of nucleobase-containing compound metabolic process	13	4133	0.47	0.0093	9606.ENSP00000244534,9606.ENSP00000316948,9606.ENSP00000319053,9606.ENSP00000330074,9606.ENSP00000332194,9606.ENSP00000347170,9606.ENSP00000350576,9606.ENSP00000370984,9606.ENSP00000386184,9606.ENSP00000400513,9606.ENSP00000411372,9606.ENSP00000428982,9606.ENSP00000484841	HIST1H1D,CLK4,ZNF77,HIST1H1B,HIST2H2AC,NEIL1,ZNF441,COMMD8,ZBED8,FASTKD1,FAM200A,CCNC,HIST1H3B
GO:0010468	regulation of gene expression	13	4533	0.43	0.012	9606.ENSP00000235382,9606.ENSP00000244534,9606.ENSP00000316948,9606.ENSP00000319053,9606.ENSP00000330074,9606.ENSP00000332194,9606.ENSP00000350576,9606.ENSP00000370984,9606.ENSP00000386184,9606.ENSP00000400513,9606.ENSP00000411372,9606.ENSP00000428982,9606.ENSP00000484841	RGS2,HIST1H1D,CLK4,ZNF77,HIST1H1B,HIST2H2AC,ZNF441,COMMD8,ZBED8,FASTKD1,FAM200A,CCNC,HIST1H3B
GO:0051252	regulation of RNA metabolic process	12	3890	0.46	0.012	9606.ENSP00000244534,9606.ENSP00000316948,9606.ENSP00000319053,9606.ENSP00000330074,9606.ENSP00000332194,9606.ENSP00000350576,9606.ENSP00000370984,9606.ENSP00000386184,9606.ENSP00000400513,9606.ENSP00000411372,9606.ENSP00000428982,9606.ENSP00000484841	HIST1H1D,CLK4,ZNF77,HIST1H1B,HIST2H2AC,ZNF441,COMMD8,ZBED8,FASTKD1,FAM200A,CCNC,HIST1H3B
GO:0051171	regulation of nitrogen compound metabolic process	14	5827	0.35	0.029	9606.ENSP00000235382,9606.ENSP00000244534,9606.ENSP00000316948,9606.ENSP00000319053,9606.ENSP00000330074,9606.ENSP00000332194,9606.ENSP00000347170,9606.ENSP00000350576,9606.ENSP00000370984,9606.ENSP00000386184,9606.ENSP00000400513,9606.ENSP00000411372,9606.ENSP00000428982,9606.ENSP00000484841	RGS2,HIST1H1D,CLK4,ZNF77,HIST1H1B,HIST2H2AC,NEIL1,ZNF441,COMMD8,ZBED8,FASTKD1,FAM200A,CCNC,HIST1H3B
GO:0006325	chromatin organization	5	683	0.83	0.0341	9606.ENSP00000244534,9606.ENSP00000330074,9606.ENSP00000332194,9606.ENSP00000379911,9606.ENSP00000484841	HIST1H1D,HIST1H1B,HIST2H2AC,CENPK,HIST1H3B
GO:0080090	regulation of primary metabolic process	14	5982	0.34	0.0341	9606.ENSP00000235382,9606.ENSP00000244534,9606.ENSP00000316948,9606.ENSP00000319053,9606.ENSP00000330074,9606.ENSP00000332194,9606.ENSP00000347170,9606.ENSP00000350576,9606.ENSP00000370984,9606.ENSP00000386184,9606.ENSP00000400513,9606.ENSP00000411372,9606.ENSP00000428982,9606.ENSP00000484841	RGS2,HIST1H1D,CLK4,ZNF77,HIST1H1B,HIST2H2AC,NEIL1,ZNF441,COMMD8,ZBED8,FASTKD1,FAM200A,CCNC,HIST1H3B
GO:0031323	regulation of cellular metabolic process	14	6082	0.33	0.0368	9606.ENSP00000235382,9606.ENSP00000244534,9606.ENSP00000316948,9606.ENSP00000319053,9606.ENSP00000330074,9606.ENSP00000332194,9606.ENSP00000347170,9606.ENSP00000350576,9606.ENSP00000370984,9606.ENSP00000386184,9606.ENSP00000400513,9606.ENSP00000411372,9606.ENSP00000428982,9606.ENSP00000484841	RGS2,HIST1H1D,CLK4,ZNF77,HIST1H1B,HIST2H2AC,NEIL1,ZNF441,COMMD8,ZBED8,FASTKD1,FAM200A,CCNC,HIST1H3B
GO:0060255	regulation of macromolecule metabolic process	14	6072	0.33	0.0368	9606.ENSP00000235382,9606.ENSP00000244534,9606.ENSP00000316948,9606.ENSP00000319053,9606.ENSP00000330074,9606.ENSP00000332194,9606.ENSP00000347170,9606.ENSP00000350576,9606.ENSP00000370984,9606.ENSP00000386184,9606.ENSP00000400513,9606.ENSP00000411372,9606.ENSP00000428982,9606.ENSP00000484841	RGS2,HIST1H1D,CLK4,ZNF77,HIST1H1B,HIST2H2AC,NEIL1,ZNF441,COMMD8,ZBED8,FASTKD1,FAM200A,CCNC,HIST1H3B

## Sheet: Cntrl_vs_Crypto_72h_KEGG_Down
Supplementary table S7: Results from the Gene Ontology (GO) analysis in the category for biological process complete (GObp) and Pathway Enrichment (KEGG pathways) in Cryptosporidium parvum infected cells at 72 hpi.
there were no significant pathway enrichment for KEGG pathways among downregulated genes
