# Supplementary material for: Gene expression profile of HCT-8 cells following single or co-infections with Cryptosporidium parvum and bovine coronavirus
Source: Research Square preprint supplement (doi:10.21203/rs.3.rs-2673942/v1), 2023-03-23
Supplement: Supplementary file 7 [file 9ac951360a31bd3a2dab340c.xlsx]

## Sheet: Par_vs_Coinfection_24_Up_Bio_PW
Supplementary table S10: Results from the Gene Ontology (GO) analysis in the category for biological process complete (GObp) and Pathway Enrichment (KEGG pathways) from single infections compared to co-infected cells at both 24 and 72 hpi.
#term ID	term description	observed gene count	background gene count	strength	false discovery rate	matching proteins in your network (IDs)	matching proteins in your network (labels)
GO:0034976	response to endoplasmic reticulum stress	19	240	0.98	1.6e-09	9606.ENSP00000200453,9606.ENSP00000216037,9606.ENSP00000222803,9606.ENSP00000249356,9606.ENSP00000253063,9606.ENSP00000277746,9606.ENSP00000305422,9606.ENSP00000306512,9606.ENSP00000307235,9606.ENSP00000344352,9606.ENSP00000360266,9606.ENSP00000364591,9606.ENSP00000378721,9606.ENSP00000381282,9606.ENSP00000409555,9606.ENSP00000418813,9606.ENSP00000446479,9606.ENSP00000448665,9606.ENSP00000473631	PPP1R15A,XBP1,FKBP14,DNAJB9,SESN2,NRBF2,CEBPB,CXCL8,EIF2AK3,ATF3,JUN,TSPYL2,SEC31A,VIMP,HERPUD1,SELK,FICD,DDIT3,DNAJC3
GO:0019222	regulation of metabolic process	97	6516	0.25	1.33e-08	9606.ENSP00000196489,9606.ENSP00000200453,9606.ENSP00000211936,9606.ENSP00000216037,9606.ENSP00000228437,9606.ENSP00000230990,9606.ENSP00000234420,9606.ENSP00000239223,9606.ENSP00000242480,9606.ENSP00000244869,9606.ENSP00000252818,9606.ENSP00000253063,9606.ENSP00000256458,9606.ENSP00000256495,9606.ENSP00000261845,9606.ENSP00000263062,9606.ENSP00000263339,9606.ENSP00000264431,9606.ENSP00000264444,…	ZNF416,PPP1R15A,ZNF184,XBP1,PRDM4,HBEGF,MSH6,DUSP1,EGR2,EREG,JUND,SESN2,IRAK2,BHLHE40,MAPK6,EPC1,IL1A,RAPGEF2,MXD1,DNAJC27,ARRDC3,ARRDC4,SIK1,CSRNP1,NRBF2,NFIL3,ZNF57,CDC25A,CEBPB,SLC25A33,EIF2AK3,DDIT4,FOSL1,NFKBIB,SIAH2,ZNF543,RAB12,RIPK4,ZNF555,GZF1,TASP1,ZBTB49,ZNF823,CCNYL1,MCPH1,ATF3,INSIG1,MAFF,PDGFA,ZNF140,UVRAG,NRARP,RASSF1,CREB5,ZSCAN12,TSC22D2,LRIG2,DUSP10,PTGS2,SUCO,CTGF,MCL1,DUSP5,PT…
GO:0031323	regulation of cellular metabolic process	93	6082	0.26	1.33e-08	9606.ENSP00000196489,9606.ENSP00000200453,9606.ENSP00000211936,9606.ENSP00000216037,9606.ENSP00000228437,9606.ENSP00000230990,9606.ENSP00000234420,9606.ENSP00000239223,9606.ENSP00000242480,9606.ENSP00000244869,9606.ENSP00000252818,9606.ENSP00000253063,9606.ENSP00000256458,9606.ENSP00000256495,9606.ENSP00000263062,9606.ENSP00000263339,9606.ENSP00000264431,9606.ENSP00000264444,9606.ENSP00000264711,…	ZNF416,PPP1R15A,ZNF184,XBP1,PRDM4,HBEGF,MSH6,DUSP1,EGR2,EREG,JUND,SESN2,IRAK2,BHLHE40,EPC1,IL1A,RAPGEF2,MXD1,DNAJC27,ARRDC3,ARRDC4,SIK1,CSRNP1,NRBF2,NFIL3,ZNF57,CDC25A,CEBPB,SLC25A33,EIF2AK3,DDIT4,FOSL1,NFKBIB,SIAH2,ZNF543,RAB12,RIPK4,ZNF555,GZF1,TASP1,ZBTB49,ZNF823,CCNYL1,MCPH1,ATF3,INSIG1,MAFF,PDGFA,ZNF140,UVRAG,NRARP,RASSF1,CREB5,ZSCAN12,TSC22D2,LRIG2,DUSP10,PTGS2,CTGF,MCL1,DUSP5,PTBP2,GADD45A…
GO:0080090	regulation of primary metabolic process	91	5982	0.26	2.06e-08	9606.ENSP00000196489,9606.ENSP00000200453,9606.ENSP00000211936,9606.ENSP00000216037,9606.ENSP00000228437,9606.ENSP00000230990,9606.ENSP00000234420,9606.ENSP00000239223,9606.ENSP00000242480,9606.ENSP00000244869,9606.ENSP00000252818,9606.ENSP00000253063,9606.ENSP00000256458,9606.ENSP00000256495,9606.ENSP00000263062,9606.ENSP00000263339,9606.ENSP00000264431,9606.ENSP00000264444,9606.ENSP00000264711,…	ZNF416,PPP1R15A,ZNF184,XBP1,PRDM4,HBEGF,MSH6,DUSP1,EGR2,EREG,JUND,SESN2,IRAK2,BHLHE40,EPC1,IL1A,RAPGEF2,MXD1,DNAJC27,ARRDC3,ARRDC4,SIK1,CSRNP1,NRBF2,NFIL3,ZNF57,CDC25A,CEBPB,SLC25A33,EIF2AK3,DDIT4,FOSL1,NFKBIB,SIAH2,ZNF543,RIPK4,ZNF555,GZF1,TASP1,ZBTB49,ZNF823,CCNYL1,MCPH1,ATF3,INSIG1,MAFF,PDGFA,ZNF140,UVRAG,NRARP,RASSF1,CREB5,ZSCAN12,TSC22D2,LRIG2,DUSP10,PTGS2,CTGF,DUSP5,PTBP2,GADD45A,JUN,LONRF3…
GO:0051171	regulation of nitrogen compound metabolic process	89	5827	0.26	2.89e-08	9606.ENSP00000196489,9606.ENSP00000200453,9606.ENSP00000211936,9606.ENSP00000216037,9606.ENSP00000228437,9606.ENSP00000230990,9606.ENSP00000234420,9606.ENSP00000239223,9606.ENSP00000242480,9606.ENSP00000244869,9606.ENSP00000252818,9606.ENSP00000253063,9606.ENSP00000256458,9606.ENSP00000256495,9606.ENSP00000263062,9606.ENSP00000263339,9606.ENSP00000264431,9606.ENSP00000264444,9606.ENSP00000264711,…	ZNF416,PPP1R15A,ZNF184,XBP1,PRDM4,HBEGF,MSH6,DUSP1,EGR2,EREG,JUND,SESN2,IRAK2,BHLHE40,EPC1,IL1A,RAPGEF2,MXD1,DNAJC27,ARRDC3,ARRDC4,SIK1,CSRNP1,NRBF2,NFIL3,ZNF57,CDC25A,CEBPB,SLC25A33,EIF2AK3,DDIT4,FOSL1,NFKBIB,SIAH2,ZNF543,RIPK4,ZNF555,GZF1,TASP1,ZBTB49,ZNF823,CCNYL1,MCPH1,ATF3,INSIG1,MAFF,PDGFA,ZNF140,UVRAG,NRARP,RASSF1,CREB5,ZSCAN12,TSC22D2,LRIG2,DUSP10,PTGS2,CTGF,DUSP5,PTBP2,GADD45A,JUN,LONRF3…
GO:0006986	response to unfolded protein	14	153	1.04	6.05e-08	9606.ENSP00000216037,9606.ENSP00000222803,9606.ENSP00000249356,9606.ENSP00000306512,9606.ENSP00000307235,9606.ENSP00000344352,9606.ENSP00000364591,9606.ENSP00000378721,9606.ENSP00000381282,9606.ENSP00000409555,9606.ENSP00000432799,9606.ENSP00000446479,9606.ENSP00000448665,9606.ENSP00000473631	XBP1,FKBP14,DNAJB9,CXCL8,EIF2AK3,ATF3,TSPYL2,SEC31A,VIMP,HERPUD1,MANF,FICD,DDIT3,DNAJC3
GO:0030968	endoplasmic reticulum unfolded protein response	12	103	1.15	9.08e-08	9606.ENSP00000216037,9606.ENSP00000222803,9606.ENSP00000249356,9606.ENSP00000306512,9606.ENSP00000307235,9606.ENSP00000344352,9606.ENSP00000364591,9606.ENSP00000378721,9606.ENSP00000381282,9606.ENSP00000409555,9606.ENSP00000448665,9606.ENSP00000473631	XBP1,FKBP14,DNAJB9,CXCL8,EIF2AK3,ATF3,TSPYL2,SEC31A,VIMP,HERPUD1,DDIT3,DNAJC3
GO:0071310	cellular response to organic substance	48	2219	0.41	1.61e-07	9606.ENSP00000216037,9606.ENSP00000222803,9606.ENSP00000227752,9606.ENSP00000239223,9606.ENSP00000242480,9606.ENSP00000244869,9606.ENSP00000249356,9606.ENSP00000252818,9606.ENSP00000253063,9606.ENSP00000256458,9606.ENSP00000261845,9606.ENSP00000263339,9606.ENSP00000264431,9606.ENSP00000270162,9606.ENSP00000296026,9606.ENSP00000297689,9606.ENSP00000305422,9606.ENSP00000306328,9606.ENSP00000306512,…	XBP1,FKBP14,IL10RA,DUSP1,EGR2,EREG,DNAJB9,JUND,SESN2,IRAK2,MAPK6,IL1A,RAPGEF2,SIK1,CXCL3,NFIL3,CEBPB,SLC25A33,CXCL8,EIF2AK3,DDIT4,NFKBIB,TNFRSF12A,RAB12,NDEL1,ATF3,INSIG1,PTGS2,CTGF,MCL1,JUN,ANKRD1,TSPYL2,IRS2,ERRFI1,EDN1,PIGA,SEC31A,HRH1,VIMP,HERPUD1,TIPARP,CXCL2,DDIT3,DNAJC3,TNFAIP3,NR4A3,MAP3K14
GO:0060255	regulation of macromolecule metabolic process	89	6072	0.25	1.67e-07	9606.ENSP00000196489,9606.ENSP00000200453,9606.ENSP00000211936,9606.ENSP00000216037,9606.ENSP00000228437,9606.ENSP00000230990,9606.ENSP00000234420,9606.ENSP00000239223,9606.ENSP00000242480,9606.ENSP00000244869,9606.ENSP00000252818,9606.ENSP00000253063,9606.ENSP00000256458,9606.ENSP00000256495,9606.ENSP00000261845,9606.ENSP00000263062,9606.ENSP00000263339,9606.ENSP00000264431,9606.ENSP00000264444,…	ZNF416,PPP1R15A,ZNF184,XBP1,PRDM4,HBEGF,MSH6,DUSP1,EGR2,EREG,JUND,SESN2,IRAK2,BHLHE40,MAPK6,EPC1,IL1A,RAPGEF2,MXD1,DNAJC27,ARRDC3,ARRDC4,SIK1,CSRNP1,NRBF2,NFIL3,ZNF57,CDC25A,CEBPB,EIF2AK3,DDIT4,FOSL1,NFKBIB,SIAH2,ZNF543,RIPK4,ZNF555,GZF1,TASP1,ZBTB49,ZNF823,CCNYL1,MCPH1,ATF3,INSIG1,MAFF,PDGFA,ZNF140,UVRAG,NRARP,RASSF1,CREB5,ZSCAN12,TSC22D2,LRIG2,DUSP10,PTGS2,CTGF,DUSP5,PTBP2,GADD45A,JUN,LONRF3,AN…
GO:0080135	regulation of cellular response to stress	24	618	0.67	1.82e-07	9606.ENSP00000200453,9606.ENSP00000216037,9606.ENSP00000249356,9606.ENSP00000259874,9606.ENSP00000307235,9606.ENSP00000333982,9606.ENSP00000344741,9606.ENSP00000355396,9606.ENSP00000355866,9606.ENSP00000356438,9606.ENSP00000356954,9606.ENSP00000358022,9606.ENSP00000360025,9606.ENSP00000360762,9606.ENSP00000368683,9606.ENSP00000368727,9606.ENSP00000381282,9606.ENSP00000409555,9606.ENSP00000432799,…	PPP1R15A,XBP1,DNAJB9,IER3,EIF2AK3,NDEL1,INSIG1,LRIG2,DUSP10,PTGS2,CTGF,MCL1,GADD45A,ANKRD1,EDN1,XDH,VIMP,HERPUD1,MANF,CRYAB,FICD,DDIT3,DNAJC3,NR4A3
GO:0009889	regulation of biosynthetic process	71	4337	0.29	2.97e-07	9606.ENSP00000196489,9606.ENSP00000200453,9606.ENSP00000211936,9606.ENSP00000216037,9606.ENSP00000228437,9606.ENSP00000230990,9606.ENSP00000239223,9606.ENSP00000242480,9606.ENSP00000244869,9606.ENSP00000252818,9606.ENSP00000253063,9606.ENSP00000256458,9606.ENSP00000256495,9606.ENSP00000263062,9606.ENSP00000263339,9606.ENSP00000264431,9606.ENSP00000264444,9606.ENSP00000270162,9606.ENSP00000273153,…	ZNF416,PPP1R15A,ZNF184,XBP1,PRDM4,HBEGF,DUSP1,EGR2,EREG,JUND,SESN2,IRAK2,BHLHE40,EPC1,IL1A,RAPGEF2,MXD1,SIK1,CSRNP1,NRBF2,NFIL3,ZNF57,CEBPB,SLC25A33,EIF2AK3,DDIT4,FOSL1,NFKBIB,SIAH2,ZNF543,RIPK4,ZNF555,GZF1,TASP1,ZBTB49,ZNF823,MCPH1,ATF3,INSIG1,MAFF,PDGFA,ZNF140,NRARP,CREB5,ZSCAN12,TSC22D2,PTGS2,SUCO,CTGF,JUN,ANKRD1,ZBTB43,TSPYL2,IRS2,ZNF165,ERRFI1,EDN1,ZMYM5,PDP1,HRH1,VIMP,ZNF527,JMJD6,CYR61,KLF…
GO:0044260	cellular macromolecule metabolic process	91	6413	0.23	3.29e-07	9606.ENSP00000196489,9606.ENSP00000200453,9606.ENSP00000211936,9606.ENSP00000216037,9606.ENSP00000222803,9606.ENSP00000228437,9606.ENSP00000230990,9606.ENSP00000234420,9606.ENSP00000239223,9606.ENSP00000242480,9606.ENSP00000244869,9606.ENSP00000249356,9606.ENSP00000252818,9606.ENSP00000253063,9606.ENSP00000255304,9606.ENSP00000256458,9606.ENSP00000256495,9606.ENSP00000258654,9606.ENSP00000261845,…	ZNF416,PPP1R15A,ZNF184,XBP1,FKBP14,PRDM4,HBEGF,MSH6,DUSP1,EGR2,EREG,DNAJB9,JUND,SESN2,USPL1,IRAK2,BHLHE40,COG3,MAPK6,EPC1,RAPGEF2,MXD1,ARRDC4,SIK1,CSRNP1,NRBF2,TRIM36,NFIL3,ZNF57,CDC25A,CEBPB,SLC25A33,CXCL8,EIF2AK3,FOSL1,FUT1,NFKBIB,SIAH2,ZNF543,RAB12,RIPK4,ZNF555,GZF1,ZBTB49,ZNF823,ATF3,MAFF,PDGFA,ZNF140,UVRAG,CREB5,FUT4,PIM3,ZSCAN12,DUSP10,CTGF,DUSP5,GADD45A,JUN,LONRF3,ZBTB43,TSPYL2,IRS2,ZNF165…
GO:0006984	ER-nucleus signaling pathway	8	34	1.45	3.62e-07	9606.ENSP00000216037,9606.ENSP00000306512,9606.ENSP00000307235,9606.ENSP00000344352,9606.ENSP00000344741,9606.ENSP00000381282,9606.ENSP00000409555,9606.ENSP00000448665	XBP1,CXCL8,EIF2AK3,ATF3,INSIG1,VIMP,HERPUD1,DDIT3
GO:0080134	regulation of response to stress	34	1299	0.5	5.53e-07	9606.ENSP00000200453,9606.ENSP00000216037,9606.ENSP00000230990,9606.ENSP00000244869,9606.ENSP00000249356,9606.ENSP00000253063,9606.ENSP00000256458,9606.ENSP00000259874,9606.ENSP00000307235,9606.ENSP00000326737,9606.ENSP00000333982,9606.ENSP00000342924,9606.ENSP00000344741,9606.ENSP00000346508,9606.ENSP00000355396,9606.ENSP00000355866,9606.ENSP00000356438,9606.ENSP00000356954,9606.ENSP00000358022,…	PPP1R15A,XBP1,HBEGF,EREG,DNAJB9,SESN2,IRAK2,IER3,EIF2AK3,TNFRSF12A,NDEL1,MCPH1,INSIG1,PDGFA,LRIG2,DUSP10,PTGS2,CTGF,MCL1,GADD45A,ANKRD1,ERRFI1,EDN1,XDH,VIMP,HERPUD1,SELK,MANF,CRYAB,FICD,DDIT3,DNAJC3,TNFAIP3,NR4A3
GO:0031324	negative regulation of cellular metabolic process	49	2463	0.38	7.14e-07	9606.ENSP00000200453,9606.ENSP00000216037,9606.ENSP00000230990,9606.ENSP00000234420,9606.ENSP00000239223,9606.ENSP00000244869,9606.ENSP00000252818,9606.ENSP00000253063,9606.ENSP00000256495,9606.ENSP00000263062,9606.ENSP00000264431,9606.ENSP00000264444,9606.ENSP00000270162,9606.ENSP00000297689,9606.ENSP00000305422,9606.ENSP00000307235,9606.ENSP00000307305,9606.ENSP00000322457,9606.ENSP00000338290,…	PPP1R15A,XBP1,HBEGF,MSH6,DUSP1,EREG,JUND,SESN2,BHLHE40,EPC1,RAPGEF2,MXD1,SIK1,NFIL3,CEBPB,EIF2AK3,DDIT4,SIAH2,GZF1,MCPH1,ATF3,INSIG1,PDGFA,ZNF140,NRARP,LRIG2,DUSP10,PTGS2,MCL1,DUSP5,PTBP2,GADD45A,JUN,ANKRD1,TSPYL2,IRS2,ERRFI1,EDN1,XDH,VIMP,HERC1,HERPUD1,NFXL1,CRYAB,USP36,DDIT3,DNAJC3,TNFAIP3,NR4A3
GO:1905897	regulation of response to endoplasmic reticulum stress	10	81	1.17	7.14e-07	9606.ENSP00000200453,9606.ENSP00000216037,9606.ENSP00000249356,9606.ENSP00000307235,9606.ENSP00000381282,9606.ENSP00000409555,9606.ENSP00000432799,9606.ENSP00000446479,9606.ENSP00000448665,9606.ENSP00000473631	PPP1R15A,XBP1,DNAJB9,EIF2AK3,VIMP,HERPUD1,MANF,FICD,DDIT3,DNAJC3
GO:0010033	response to organic substance	53	2815	0.35	7.69e-07	9606.ENSP00000216037,9606.ENSP00000222803,9606.ENSP00000227752,9606.ENSP00000239223,9606.ENSP00000242480,9606.ENSP00000244869,9606.ENSP00000249356,9606.ENSP00000252818,9606.ENSP00000253063,9606.ENSP00000256458,9606.ENSP00000261845,9606.ENSP00000263339,9606.ENSP00000264431,9606.ENSP00000270162,9606.ENSP00000296026,9606.ENSP00000297689,9606.ENSP00000305422,9606.ENSP00000306328,9606.ENSP00000306512,…	XBP1,FKBP14,IL10RA,DUSP1,EGR2,EREG,DNAJB9,JUND,SESN2,IRAK2,MAPK6,IL1A,RAPGEF2,SIK1,CXCL3,NFIL3,CEBPB,SLC25A33,CXCL8,EIF2AK3,DDIT4,FOSL1,NFKBIB,TNFRSF12A,RAB12,NDEL1,ATF3,INSIG1,DUSP10,PTGS2,CTGF,MCL1,JUN,ANKRD1,TSPYL2,IRS2,ERRFI1,EDN1,PIGA,SEC31A,HRH1,VIMP,HERPUD1,TIPARP,CXCL2,MANF,CRYAB,FICD,DDIT3,DNAJC3,TNFAIP3,NR4A3,MAP3K14
GO:0051726	regulation of cell cycle	31	1129	0.52	8.6e-07	9606.ENSP00000200453,9606.ENSP00000239223,9606.ENSP00000244869,9606.ENSP00000252818,9606.ENSP00000263062,9606.ENSP00000263339,9606.ENSP00000270162,9606.ENSP00000282369,9606.ENSP00000286760,9606.ENSP00000303706,9606.ENSP00000306328,9606.ENSP00000306512,9606.ENSP00000310170,9606.ENSP00000338807,9606.ENSP00000342344,9606.ENSP00000342924,9606.ENSP00000348455,9606.ENSP00000349547,9606.ENSP00000353824,…	PPP1R15A,DUSP1,EREG,JUND,EPC1,IL1A,SIK1,TRIM36,WHAMM,CDC25A,SLC25A33,CXCL8,FOSL1,ZBTB49,CCNYL1,MCPH1,UVRAG,RASSF1,PIM3,PTGS2,CTGF,GADD45A,JUN,GPR3,TSPYL2,EDN1,NABP1,DDIT3,TNFAIP3,NR4A3,MAP3K14
GO:0033554	cellular response to stress	37	1553	0.46	8.87e-07	9606.ENSP00000200453,9606.ENSP00000216037,9606.ENSP00000222803,9606.ENSP00000234420,9606.ENSP00000249356,9606.ENSP00000253063,9606.ENSP00000256458,9606.ENSP00000263339,9606.ENSP00000277746,9606.ENSP00000305422,9606.ENSP00000306512,9606.ENSP00000307235,9606.ENSP00000307305,9606.ENSP00000344352,9606.ENSP00000344741,9606.ENSP00000348455,9606.ENSP00000349547,9606.ENSP00000356438,9606.ENSP00000358022,…	PPP1R15A,XBP1,FKBP14,MSH6,DNAJB9,SESN2,IRAK2,IL1A,NRBF2,CEBPB,CXCL8,EIF2AK3,DDIT4,ATF3,INSIG1,UVRAG,RASSF1,PTGS2,MCL1,GADD45A,JUN,ANKRD1,TSPYL2,ERRFI1,EDN1,SEC31A,VIMP,NABP1,HERPUD1,SELK,CDKN2AIP,CRYAB,FICD,DDIT3,DNAJC3,TNFAIP3,MAP3K14
GO:0032496	response to lipopolysaccharide	16	298	0.81	1.08e-06	9606.ENSP00000216037,9606.ENSP00000227752,9606.ENSP00000252818,9606.ENSP00000256458,9606.ENSP00000296026,9606.ENSP00000305422,9606.ENSP00000306512,9606.ENSP00000312988,9606.ENSP00000355866,9606.ENSP00000356438,9606.ENSP00000360266,9606.ENSP00000360762,9606.ENSP00000368683,9606.ENSP00000381282,9606.ENSP00000427279,9606.ENSP00000481570	XBP1,IL10RA,JUND,IRAK2,CXCL3,CEBPB,CXCL8,NFKBIB,DUSP10,PTGS2,JUN,ANKRD1,EDN1,VIMP,CXCL2,TNFAIP3
GO:0050794	regulation of cellular process	123	10484	0.15	1.08e-06	9606.ENSP00000196489,9606.ENSP00000200453,9606.ENSP00000211936,9606.ENSP00000216037,9606.ENSP00000222803,9606.ENSP00000227752,9606.ENSP00000228437,9606.ENSP00000230990,9606.ENSP00000234420,9606.ENSP00000239223,9606.ENSP00000242480,9606.ENSP00000244869,9606.ENSP00000249356,9606.ENSP00000252818,9606.ENSP00000253063,9606.ENSP00000256458,9606.ENSP00000256495,9606.ENSP00000259874,9606.ENSP00000261845,…	ZNF416,PPP1R15A,ZNF184,XBP1,FKBP14,IL10RA,PRDM4,HBEGF,MSH6,DUSP1,EGR2,EREG,DNAJB9,JUND,SESN2,IRAK2,BHLHE40,IER3,MAPK6,EPC1,IL1A,RAPGEF2,MXD1,DNAJC27,ARRDC3,ARRDC4,SIK1,SLC20A1,CSRNP1,NRBF2,TRIM36,WHAMM,CXCL3,NFIL3,ZNF57,CDC25A,CEBPB,SLC25A33,CXCL8,EIF2AK3,DDIT4,FOSL1,NFKBIB,LURAP1L,SIAH2,ZNF543,TNFRSF12A,RAB12,RIPK4,NDEL1,ZNF555,GZF1,TASP1,ZBTB49,ZNF823,CCNYL1,MCPH1,ATF3,INSIG1,MAFF,PDGFA,ZNF140,…
GO:0031326	regulation of cellular biosynthetic process	68	4266	0.28	1.41e-06	9606.ENSP00000196489,9606.ENSP00000200453,9606.ENSP00000211936,9606.ENSP00000216037,9606.ENSP00000228437,9606.ENSP00000230990,9606.ENSP00000239223,9606.ENSP00000242480,9606.ENSP00000244869,9606.ENSP00000252818,9606.ENSP00000253063,9606.ENSP00000256458,9606.ENSP00000256495,9606.ENSP00000263062,9606.ENSP00000263339,9606.ENSP00000264431,9606.ENSP00000264444,9606.ENSP00000270162,9606.ENSP00000273153,…	ZNF416,PPP1R15A,ZNF184,XBP1,PRDM4,HBEGF,DUSP1,EGR2,EREG,JUND,SESN2,IRAK2,BHLHE40,EPC1,IL1A,RAPGEF2,MXD1,SIK1,CSRNP1,NRBF2,NFIL3,ZNF57,CEBPB,EIF2AK3,DDIT4,FOSL1,NFKBIB,SIAH2,ZNF543,RIPK4,ZNF555,GZF1,TASP1,ZBTB49,ZNF823,MCPH1,ATF3,INSIG1,MAFF,PDGFA,ZNF140,NRARP,CREB5,ZSCAN12,TSC22D2,PTGS2,JUN,ANKRD1,ZBTB43,TSPYL2,IRS2,ZNF165,ERRFI1,EDN1,ZMYM5,PDP1,HRH1,VIMP,ZNF527,JMJD6,CYR61,KLF6,NFXL1,DDIT3,ZNF69…
GO:0009892	negative regulation of metabolic process	51	2762	0.35	2.42e-06	9606.ENSP00000200453,9606.ENSP00000216037,9606.ENSP00000230990,9606.ENSP00000234420,9606.ENSP00000239223,9606.ENSP00000244869,9606.ENSP00000252818,9606.ENSP00000253063,9606.ENSP00000256495,9606.ENSP00000263062,9606.ENSP00000264431,9606.ENSP00000264444,9606.ENSP00000270162,9606.ENSP00000297689,9606.ENSP00000305422,9606.ENSP00000307235,9606.ENSP00000307305,9606.ENSP00000322457,9606.ENSP00000338290,…	PPP1R15A,XBP1,HBEGF,MSH6,DUSP1,EREG,JUND,SESN2,BHLHE40,EPC1,RAPGEF2,MXD1,SIK1,NFIL3,CEBPB,EIF2AK3,DDIT4,SIAH2,GZF1,MCPH1,ATF3,INSIG1,PDGFA,ZNF140,NRARP,LRIG2,DUSP10,PTGS2,CTGF,MCL1,DUSP5,PTBP2,GADD45A,JUN,ANKRD1,TSPYL2,IRS2,ERRFI1,EDN1,XDH,VIMP,HERC1,HERPUD1,TIPARP,NFXL1,CRYAB,USP36,DDIT3,DNAJC3,TNFAIP3,NR4A3
GO:0043170	macromolecule metabolic process	97	7453	0.19	3.33e-06	9606.ENSP00000196489,9606.ENSP00000200453,9606.ENSP00000211936,9606.ENSP00000216037,9606.ENSP00000222803,9606.ENSP00000228437,9606.ENSP00000230990,9606.ENSP00000234420,9606.ENSP00000239223,9606.ENSP00000242480,9606.ENSP00000244869,9606.ENSP00000249356,9606.ENSP00000252818,9606.ENSP00000253063,9606.ENSP00000255304,9606.ENSP00000256458,9606.ENSP00000256495,9606.ENSP00000258654,9606.ENSP00000261845,…	ZNF416,PPP1R15A,ZNF184,XBP1,FKBP14,PRDM4,HBEGF,MSH6,DUSP1,EGR2,EREG,DNAJB9,JUND,SESN2,USPL1,IRAK2,BHLHE40,COG3,MAPK6,EPC1,RAPGEF2,MXD1,ARRDC4,SIK1,CSRNP1,NRBF2,ZC3H12C,TRIM36,RP9,NFIL3,ZNF57,CDC25A,CEBPB,SLC25A33,CXCL8,EIF2AK3,FOSL1,FUT1,NFKBIB,SIAH2,ZNF543,RAB12,RIPK4,NDEL1,ZNF555,GZF1,TASP1,ZBTB49,ZNF823,ATF3,MAFF,PDGFA,ZNF140,UVRAG,CREB5,FUT4,PIM3,ZSCAN12,DUSP10,CTGF,DUSP5,PTBP2,GADD45A,JUN,LO…
GO:0001944	vasculature development	19	487	0.67	4.55e-06	9606.ENSP00000216037,9606.ENSP00000244869,9606.ENSP00000263062,9606.ENSP00000264431,9606.ENSP00000306512,9606.ENSP00000307235,9606.ENSP00000310170,9606.ENSP00000326737,9606.ENSP00000346508,9606.ENSP00000349041,9606.ENSP00000356438,9606.ENSP00000356954,9606.ENSP00000360266,9606.ENSP00000366702,9606.ENSP00000368683,9606.ENSP00000394085,9606.ENSP00000398736,9606.ENSP00000420612,9606.ENSP00000448665	XBP1,EREG,EPC1,RAPGEF2,CXCL8,EIF2AK3,FOSL1,TNFRSF12A,PDGFA,NRARP,PTGS2,CTGF,JUN,ERRFI1,EDN1,JMJD6,CYR61,TIPARP,DDIT3
GO:0070887	cellular response to chemical stimulus	49	2672	0.34	5.78e-06	9606.ENSP00000216037,9606.ENSP00000222803,9606.ENSP00000227752,9606.ENSP00000230990,9606.ENSP00000239223,9606.ENSP00000242480,9606.ENSP00000244869,9606.ENSP00000249356,9606.ENSP00000252818,9606.ENSP00000253063,9606.ENSP00000256458,9606.ENSP00000261845,9606.ENSP00000263339,9606.ENSP00000264431,9606.ENSP00000270162,9606.ENSP00000296026,9606.ENSP00000297689,9606.ENSP00000305422,9606.ENSP00000306328,…	XBP1,FKBP14,IL10RA,HBEGF,DUSP1,EGR2,EREG,DNAJB9,JUND,SESN2,IRAK2,MAPK6,IL1A,RAPGEF2,SIK1,CXCL3,NFIL3,CEBPB,SLC25A33,CXCL8,EIF2AK3,DDIT4,NFKBIB,TNFRSF12A,RAB12,NDEL1,ATF3,INSIG1,PTGS2,CTGF,MCL1,JUN,ANKRD1,TSPYL2,IRS2,ERRFI1,EDN1,PIGA,SEC31A,HRH1,VIMP,HERPUD1,TIPARP,CXCL2,DDIT3,DNAJC3,TNFAIP3,NR4A3,MAP3K14
GO:0065007	biological regulation	130	11740	0.12	6.77e-06	9606.ENSP00000196489,9606.ENSP00000200453,9606.ENSP00000211936,9606.ENSP00000216037,9606.ENSP00000222803,9606.ENSP00000227752,9606.ENSP00000228437,9606.ENSP00000230990,9606.ENSP00000234420,9606.ENSP00000239223,9606.ENSP00000242480,9606.ENSP00000244869,9606.ENSP00000249356,9606.ENSP00000252818,9606.ENSP00000253063,9606.ENSP00000256458,9606.ENSP00000256495,9606.ENSP00000258654,9606.ENSP00000259874,…	ZNF416,PPP1R15A,ZNF184,XBP1,FKBP14,IL10RA,PRDM4,HBEGF,MSH6,DUSP1,EGR2,EREG,DNAJB9,JUND,SESN2,IRAK2,BHLHE40,COG3,IER3,MAPK6,EPC1,IL1A,RAPGEF2,MXD1,DNAJC27,ARRDC3,ARRDC4,SIK1,SLC20A1,CSRNP1,NRBF2,SLC7A11,TRIM36,WHAMM,CXCL3,SLC25A32,NFIL3,ZNF57,CDC25A,CEBPB,SLC25A33,CXCL8,EIF2AK3,DDIT4,FOSL1,NFKBIB,LURAP1L,SIAH2,ZNF543,TNFRSF12A,RAB12,RIPK4,NDEL1,ZNF555,GZF1,TASP1,ZBTB49,ZNF823,CCNYL1,MCPH1,ATF3,INS…
GO:0044237	cellular metabolic process	107	8797	0.16	9.21e-06	9606.ENSP00000075120,9606.ENSP00000196489,9606.ENSP00000200453,9606.ENSP00000211936,9606.ENSP00000216037,9606.ENSP00000222803,9606.ENSP00000228437,9606.ENSP00000230990,9606.ENSP00000234420,9606.ENSP00000239223,9606.ENSP00000242480,9606.ENSP00000244869,9606.ENSP00000249356,9606.ENSP00000252818,9606.ENSP00000253063,9606.ENSP00000255304,9606.ENSP00000256458,9606.ENSP00000256495,9606.ENSP00000258654,…	SLC2A3,ZNF416,PPP1R15A,ZNF184,XBP1,FKBP14,PRDM4,HBEGF,MSH6,DUSP1,EGR2,EREG,DNAJB9,JUND,SESN2,USPL1,IRAK2,BHLHE40,COG3,MAPK6,EPC1,RAPGEF2,MXD1,ARRDC4,SIK1,SLC20A1,CSRNP1,NRBF2,ZC3H12C,TRIM36,RP9,SLC25A32,NFIL3,ZNF57,CDC25A,CEBPB,SLC25A33,CXCL8,EIF2AK3,DDIT4,FOSL1,FUT1,NFKBIB,SIAH2,ZNF543,RAB12,RIPK4,ZNF555,GZF1,ZBTB49,ZNF823,ATF3,INSIG1,MAFF,PDGFA,ZNF140,UVRAG,CREB5,FUT4,PIM3,ZSCAN12,DUSP10,PTGS2,…
GO:0048522	positive regulation of cellular process	72	4898	0.25	9.21e-06	9606.ENSP00000200453,9606.ENSP00000216037,9606.ENSP00000228437,9606.ENSP00000230990,9606.ENSP00000234420,9606.ENSP00000239223,9606.ENSP00000242480,9606.ENSP00000244869,9606.ENSP00000252818,9606.ENSP00000253063,9606.ENSP00000256458,9606.ENSP00000261845,9606.ENSP00000263062,9606.ENSP00000263339,9606.ENSP00000264431,9606.ENSP00000264711,9606.ENSP00000265138,9606.ENSP00000268042,9606.ENSP00000270162,…	PPP1R15A,XBP1,PRDM4,HBEGF,MSH6,DUSP1,EGR2,EREG,JUND,SESN2,IRAK2,MAPK6,EPC1,IL1A,RAPGEF2,DNAJC27,ARRDC3,ARRDC4,SIK1,CSRNP1,WHAMM,CXCL3,CDC25A,CEBPB,SLC25A33,CXCL8,EIF2AK3,DDIT4,FOSL1,NFKBIB,LURAP1L,TNFRSF12A,RAB12,NDEL1,TASP1,ZBTB49,ATF3,INSIG1,MAFF,PDGFA,UVRAG,NRARP,RASSF1,CREB5,DUSP10,PTGS2,SUCO,CTGF,MCL1,ADRB1,DUSP5,GADD45A,JUN,LONRF3,ANKRD1,IRS2,EDN1,XDH,HRH1,CYR61,SYBU,HERPUD1,DCUN1D2,SELK,KL…
GO:0019220	regulation of phosphate metabolic process	36	1657	0.42	9.35e-06	9606.ENSP00000200453,9606.ENSP00000216037,9606.ENSP00000230990,9606.ENSP00000239223,9606.ENSP00000244869,9606.ENSP00000253063,9606.ENSP00000256458,9606.ENSP00000264431,9606.ENSP00000264711,9606.ENSP00000277746,9606.ENSP00000303706,9606.ENSP00000306328,9606.ENSP00000307235,9606.ENSP00000307305,9606.ENSP00000342344,9606.ENSP00000342924,9606.ENSP00000344352,9606.ENSP00000346508,9606.ENSP00000348455,…	PPP1R15A,XBP1,HBEGF,DUSP1,EREG,SESN2,IRAK2,RAPGEF2,DNAJC27,NRBF2,CDC25A,SLC25A33,EIF2AK3,DDIT4,CCNYL1,MCPH1,ATF3,PDGFA,UVRAG,DUSP10,PTGS2,CTGF,DUSP5,GADD45A,JUN,TSPYL2,IRS2,ERRFI1,EDN1,XDH,PDP1,HRH1,CYR61,DNAJC3,TNFAIP3,MAP3K14
GO:0050789	regulation of biological process	125	11116	0.13	9.35e-06	9606.ENSP00000196489,9606.ENSP00000200453,9606.ENSP00000211936,9606.ENSP00000216037,9606.ENSP00000222803,9606.ENSP00000227752,9606.ENSP00000228437,9606.ENSP00000230990,9606.ENSP00000234420,9606.ENSP00000239223,9606.ENSP00000242480,9606.ENSP00000244869,9606.ENSP00000249356,9606.ENSP00000252818,9606.ENSP00000253063,9606.ENSP00000256458,9606.ENSP00000256495,9606.ENSP00000259874,9606.ENSP00000261845,…	ZNF416,PPP1R15A,ZNF184,XBP1,FKBP14,IL10RA,PRDM4,HBEGF,MSH6,DUSP1,EGR2,EREG,DNAJB9,JUND,SESN2,IRAK2,BHLHE40,IER3,MAPK6,EPC1,IL1A,RAPGEF2,MXD1,DNAJC27,ARRDC3,ARRDC4,SIK1,SLC20A1,CSRNP1,NRBF2,TRIM36,WHAMM,CXCL3,NFIL3,ZNF57,CDC25A,CEBPB,SLC25A33,CXCL8,EIF2AK3,DDIT4,FOSL1,NFKBIB,LURAP1L,SIAH2,ZNF543,TNFRSF12A,RAB12,RIPK4,NDEL1,ZNF555,GZF1,TASP1,ZBTB49,ZNF823,CCNYL1,MCPH1,ATF3,INSIG1,MAFF,PDGFA,ZNF140,…
GO:0009893	positive regulation of metabolic process	55	3280	0.3	1.02e-05	9606.ENSP00000200453,9606.ENSP00000216037,9606.ENSP00000228437,9606.ENSP00000230990,9606.ENSP00000234420,9606.ENSP00000242480,9606.ENSP00000244869,9606.ENSP00000252818,9606.ENSP00000253063,9606.ENSP00000256458,9606.ENSP00000263062,9606.ENSP00000263339,9606.ENSP00000264431,9606.ENSP00000264711,9606.ENSP00000265138,9606.ENSP00000268042,9606.ENSP00000273153,9606.ENSP00000297689,9606.ENSP00000305422,…	PPP1R15A,XBP1,PRDM4,HBEGF,MSH6,EGR2,EREG,JUND,SESN2,IRAK2,EPC1,IL1A,RAPGEF2,DNAJC27,ARRDC3,ARRDC4,CSRNP1,NFIL3,CEBPB,EIF2AK3,FOSL1,NFKBIB,RAB12,TASP1,ZBTB49,ATF3,INSIG1,MAFF,PDGFA,UVRAG,RASSF1,CREB5,PTGS2,SUCO,CTGF,DUSP5,GADD45A,JUN,LONRF3,ANKRD1,IRS2,EDN1,XDH,PIGA,HRH1,CYR61,HERPUD1,DCUN1D2,KLF6,TIPARP,DDIT3,DNAJC3,TNFAIP3,NR4A3,MAP3K14
GO:0033993	response to lipid	24	825	0.54	1.1e-05	9606.ENSP00000216037,9606.ENSP00000227752,9606.ENSP00000239223,9606.ENSP00000252818,9606.ENSP00000256458,9606.ENSP00000296026,9606.ENSP00000305422,9606.ENSP00000306512,9606.ENSP00000307305,9606.ENSP00000310170,9606.ENSP00000312988,9606.ENSP00000344741,9606.ENSP00000355866,9606.ENSP00000356438,9606.ENSP00000356954,9606.ENSP00000360266,9606.ENSP00000360762,9606.ENSP00000366702,9606.ENSP00000368683,…	XBP1,IL10RA,DUSP1,JUND,IRAK2,CXCL3,CEBPB,CXCL8,DDIT4,FOSL1,NFKBIB,INSIG1,DUSP10,PTGS2,CTGF,JUN,ANKRD1,ERRFI1,EDN1,VIMP,CXCL2,CRYAB,TNFAIP3,NR4A3
GO:0048518	positive regulation of biological process	77	5459	0.23	1.11e-05	9606.ENSP00000200453,9606.ENSP00000216037,9606.ENSP00000228437,9606.ENSP00000230990,9606.ENSP00000234420,9606.ENSP00000239223,9606.ENSP00000242480,9606.ENSP00000244869,9606.ENSP00000252818,9606.ENSP00000253063,9606.ENSP00000256458,9606.ENSP00000261845,9606.ENSP00000263062,9606.ENSP00000263339,9606.ENSP00000264431,9606.ENSP00000264711,9606.ENSP00000265138,9606.ENSP00000268042,9606.ENSP00000270162,…	PPP1R15A,XBP1,PRDM4,HBEGF,MSH6,DUSP1,EGR2,EREG,JUND,SESN2,IRAK2,MAPK6,EPC1,IL1A,RAPGEF2,DNAJC27,ARRDC3,ARRDC4,SIK1,CSRNP1,WHAMM,CXCL3,NFIL3,CDC25A,CEBPB,SLC25A33,CXCL8,EIF2AK3,DDIT4,FOSL1,NFKBIB,LURAP1L,TNFRSF12A,RAB12,RIPK4,NDEL1,TASP1,ZBTB49,ATF3,INSIG1,MAFF,PDGFA,UVRAG,NRARP,RASSF1,CREB5,LRIG2,DUSP10,PTGS2,SUCO,CTGF,MCL1,ADRB1,DUSP5,GADD45A,JUN,LONRF3,ANKRD1,IRS2,EDN1,XDH,PIGA,HRH1,CYR61,SYBU,…
GO:0035556	intracellular signal transduction	34	1528	0.43	1.13e-05	9606.ENSP00000200453,9606.ENSP00000216037,9606.ENSP00000230990,9606.ENSP00000234420,9606.ENSP00000239223,9606.ENSP00000244869,9606.ENSP00000253063,9606.ENSP00000256458,9606.ENSP00000261845,9606.ENSP00000264431,9606.ENSP00000270162,9606.ENSP00000305422,9606.ENSP00000306512,9606.ENSP00000307235,9606.ENSP00000307305,9606.ENSP00000322457,9606.ENSP00000346508,9606.ENSP00000349547,9606.ENSP00000356954,…	PPP1R15A,XBP1,HBEGF,MSH6,DUSP1,EREG,SESN2,IRAK2,MAPK6,RAPGEF2,SIK1,CEBPB,CXCL8,EIF2AK3,DDIT4,SIAH2,PDGFA,RASSF1,CTGF,MCL1,ADRB1,DUSP5,GADD45A,JUN,GPR3,RND3,IRS2,EDN1,HRH1,SELK,CRYAB,DDIT3,TNFAIP3,MAP3K14
GO:0042325	regulation of phosphorylation	33	1465	0.43	1.33e-05	9606.ENSP00000216037,9606.ENSP00000230990,9606.ENSP00000239223,9606.ENSP00000244869,9606.ENSP00000253063,9606.ENSP00000256458,9606.ENSP00000264431,9606.ENSP00000264711,9606.ENSP00000277746,9606.ENSP00000303706,9606.ENSP00000306328,9606.ENSP00000307235,9606.ENSP00000307305,9606.ENSP00000342344,9606.ENSP00000342924,9606.ENSP00000344352,9606.ENSP00000346508,9606.ENSP00000348455,9606.ENSP00000355866,…	XBP1,HBEGF,DUSP1,EREG,SESN2,IRAK2,RAPGEF2,DNAJC27,NRBF2,CDC25A,SLC25A33,EIF2AK3,DDIT4,CCNYL1,MCPH1,ATF3,PDGFA,UVRAG,DUSP10,PTGS2,CTGF,DUSP5,GADD45A,JUN,TSPYL2,IRS2,ERRFI1,EDN1,XDH,CYR61,DNAJC3,TNFAIP3,MAP3K14
GO:0010646	regulation of cell communication	55	3327	0.3	1.45e-05	9606.ENSP00000200453,9606.ENSP00000216037,9606.ENSP00000230990,9606.ENSP00000239223,9606.ENSP00000242480,9606.ENSP00000244869,9606.ENSP00000249356,9606.ENSP00000253063,9606.ENSP00000256458,9606.ENSP00000259874,9606.ENSP00000263339,9606.ENSP00000264431,9606.ENSP00000264711,9606.ENSP00000265138,9606.ENSP00000296026,9606.ENSP00000306512,9606.ENSP00000307235,9606.ENSP00000307305,9606.ENSP00000321026,…	PPP1R15A,XBP1,HBEGF,DUSP1,EGR2,EREG,DNAJB9,SESN2,IRAK2,IER3,IL1A,RAPGEF2,DNAJC27,ARRDC3,CXCL3,CXCL8,EIF2AK3,DDIT4,LURAP1L,SIAH2,TNFRSF12A,ATF3,INSIG1,PDGFA,NRARP,PIM3,LRIG2,DUSP10,PTGS2,RGS16,CTGF,MCL1,ADRB1,DUSP5,GADD45A,JUN,ANKRD1,TSPYL2,IRS2,ERRFI1,EDN1,XDH,HRH1,VIMP,CYR61,SYBU,HERPUD1,SELK,CDKN2AIP,CXCL2,MANF,FICD,DDIT3,TNFAIP3,MAP3K14
GO:0036499	PERK-mediated unfolded protein response	5	12	1.7	1.5e-05	9606.ENSP00000306512,9606.ENSP00000307235,9606.ENSP00000344352,9606.ENSP00000409555,9606.ENSP00000448665	CXCL8,EIF2AK3,ATF3,HERPUD1,DDIT3
GO:0044238	primary metabolic process	106	8808	0.16	1.69e-05	9606.ENSP00000075120,9606.ENSP00000196489,9606.ENSP00000200453,9606.ENSP00000211936,9606.ENSP00000216037,9606.ENSP00000222803,9606.ENSP00000228437,9606.ENSP00000230990,9606.ENSP00000234420,9606.ENSP00000239223,9606.ENSP00000242480,9606.ENSP00000244869,9606.ENSP00000249356,9606.ENSP00000252818,9606.ENSP00000253063,9606.ENSP00000255304,9606.ENSP00000256458,9606.ENSP00000256495,9606.ENSP00000258654,…	SLC2A3,ZNF416,PPP1R15A,ZNF184,XBP1,FKBP14,PRDM4,HBEGF,MSH6,DUSP1,EGR2,EREG,DNAJB9,JUND,SESN2,USPL1,IRAK2,BHLHE40,COG3,MAPK6,EPC1,RAPGEF2,MXD1,ARRDC4,SIK1,CSRNP1,NRBF2,ZC3H12C,TRIM36,RP9,SLC25A32,NFIL3,ZNF57,CDC25A,CEBPB,SLC25A33,EIF2AK3,FOSL1,FUT1,NFKBIB,SIAH2,ZNF543,RAB12,RIPK4,NDEL1,ZNF555,GZF1,TASP1,ZBTB49,ZNF823,ATF3,INSIG1,MAFF,PDGFA,ZNF140,UVRAG,CREB5,FUT4,PIM3,ZSCAN12,DUSP10,PTGS2,UAP1,CTG…
GO:0006807	nitrogen compound metabolic process	102	8349	0.17	1.86e-05	9606.ENSP00000196489,9606.ENSP00000200453,9606.ENSP00000211936,9606.ENSP00000216037,9606.ENSP00000222803,9606.ENSP00000228437,9606.ENSP00000230990,9606.ENSP00000234420,9606.ENSP00000239223,9606.ENSP00000242480,9606.ENSP00000244869,9606.ENSP00000249356,9606.ENSP00000252818,9606.ENSP00000253063,9606.ENSP00000255304,9606.ENSP00000256458,9606.ENSP00000256495,9606.ENSP00000258654,9606.ENSP00000261845,…	ZNF416,PPP1R15A,ZNF184,XBP1,FKBP14,PRDM4,HBEGF,MSH6,DUSP1,EGR2,EREG,DNAJB9,JUND,SESN2,USPL1,IRAK2,BHLHE40,COG3,MAPK6,EPC1,RAPGEF2,MXD1,ARRDC4,SIK1,CSRNP1,NRBF2,ZC3H12C,TRIM36,RP9,SLC25A32,NFIL3,ZNF57,CDC25A,CEBPB,SLC25A33,EIF2AK3,FOSL1,FUT1,NFKBIB,SIAH2,ZNF543,RAB12,RIPK4,NDEL1,ZNF555,GZF1,TASP1,ZBTB49,ZNF823,ATF3,MAFF,PDGFA,ZNF140,UVRAG,CREB5,FUT4,PIM3,ZSCAN12,DUSP10,PTGS2,UAP1,CTGF,DUSP5,PTBP2,…
GO:0006950	response to stress	54	3267	0.3	1.86e-05	9606.ENSP00000200453,9606.ENSP00000216037,9606.ENSP00000222803,9606.ENSP00000230990,9606.ENSP00000234420,9606.ENSP00000239223,9606.ENSP00000244869,9606.ENSP00000249356,9606.ENSP00000253063,9606.ENSP00000256458,9606.ENSP00000263339,9606.ENSP00000277746,9606.ENSP00000280612,9606.ENSP00000296026,9606.ENSP00000305422,9606.ENSP00000306512,9606.ENSP00000307235,9606.ENSP00000307305,9606.ENSP00000310170,…	PPP1R15A,XBP1,FKBP14,HBEGF,MSH6,DUSP1,EREG,DNAJB9,SESN2,IRAK2,IL1A,NRBF2,SLC7A11,CXCL3,CEBPB,CXCL8,EIF2AK3,DDIT4,FOSL1,RAB12,ATF3,INSIG1,MAFF,PDGFA,UVRAG,RASSF1,TSC22D2,PTGS2,CTGF,MCL1,ADRB1,GADD45A,JUN,ANKRD1,TSPYL2,ERRFI1,EDN1,SEC31A,HRH1,VIMP,CYR61,NABP1,HERPUD1,SELK,CDKN2AIP,CXCL2,MANF,CRYAB,FICD,DDIT3,DNAJC3,TNFAIP3,NR4A3,MAP3K14
GO:0023051	regulation of signaling	55	3360	0.29	1.86e-05	9606.ENSP00000200453,9606.ENSP00000216037,9606.ENSP00000230990,9606.ENSP00000239223,9606.ENSP00000242480,9606.ENSP00000244869,9606.ENSP00000249356,9606.ENSP00000253063,9606.ENSP00000256458,9606.ENSP00000259874,9606.ENSP00000263339,9606.ENSP00000264431,9606.ENSP00000264711,9606.ENSP00000265138,9606.ENSP00000296026,9606.ENSP00000306512,9606.ENSP00000307235,9606.ENSP00000307305,9606.ENSP00000321026,…	PPP1R15A,XBP1,HBEGF,DUSP1,EGR2,EREG,DNAJB9,SESN2,IRAK2,IER3,IL1A,RAPGEF2,DNAJC27,ARRDC3,CXCL3,CXCL8,EIF2AK3,DDIT4,LURAP1L,SIAH2,TNFRSF12A,ATF3,INSIG1,PDGFA,NRARP,PIM3,LRIG2,DUSP10,PTGS2,RGS16,CTGF,MCL1,ADRB1,DUSP5,GADD45A,JUN,ANKRD1,TSPYL2,IRS2,ERRFI1,EDN1,XDH,HRH1,VIMP,CYR61,SYBU,HERPUD1,SELK,CDKN2AIP,CXCL2,MANF,FICD,DDIT3,TNFAIP3,MAP3K14
GO:0031399	regulation of protein modification process	36	1747	0.39	2.38e-05	9606.ENSP00000200453,9606.ENSP00000216037,9606.ENSP00000230990,9606.ENSP00000239223,9606.ENSP00000244869,9606.ENSP00000253063,9606.ENSP00000256458,9606.ENSP00000264431,9606.ENSP00000264711,9606.ENSP00000265138,9606.ENSP00000268042,9606.ENSP00000303706,9606.ENSP00000307235,9606.ENSP00000307305,9606.ENSP00000322457,9606.ENSP00000342344,9606.ENSP00000344352,9606.ENSP00000346508,9606.ENSP00000348455,…	PPP1R15A,XBP1,HBEGF,DUSP1,EREG,SESN2,IRAK2,RAPGEF2,DNAJC27,ARRDC3,ARRDC4,CDC25A,EIF2AK3,DDIT4,SIAH2,CCNYL1,ATF3,PDGFA,UVRAG,RASSF1,DUSP10,PTGS2,CTGF,DUSP5,GADD45A,JUN,TSPYL2,ERRFI1,EDN1,XDH,CYR61,HERPUD1,DCUN1D2,DNAJC3,TNFAIP3,MAP3K14
GO:0009966	regulation of signal transduction	51	3033	0.31	2.57e-05	9606.ENSP00000200453,9606.ENSP00000216037,9606.ENSP00000230990,9606.ENSP00000239223,9606.ENSP00000244869,9606.ENSP00000249356,9606.ENSP00000253063,9606.ENSP00000256458,9606.ENSP00000259874,9606.ENSP00000263339,9606.ENSP00000264431,9606.ENSP00000264711,9606.ENSP00000265138,9606.ENSP00000296026,9606.ENSP00000306512,9606.ENSP00000307235,9606.ENSP00000307305,9606.ENSP00000321026,9606.ENSP00000322457,…	PPP1R15A,XBP1,HBEGF,DUSP1,EREG,DNAJB9,SESN2,IRAK2,IER3,IL1A,RAPGEF2,DNAJC27,ARRDC3,CXCL3,CXCL8,EIF2AK3,DDIT4,LURAP1L,SIAH2,TNFRSF12A,ATF3,INSIG1,PDGFA,NRARP,LRIG2,DUSP10,PTGS2,RGS16,CTGF,MCL1,ADRB1,DUSP5,GADD45A,JUN,ANKRD1,TSPYL2,IRS2,ERRFI1,EDN1,XDH,VIMP,CYR61,HERPUD1,SELK,CDKN2AIP,CXCL2,MANF,FICD,DDIT3,TNFAIP3,MAP3K14
GO:0001568	blood vessel development	17	464	0.64	3.27e-05	9606.ENSP00000216037,9606.ENSP00000244869,9606.ENSP00000264431,9606.ENSP00000306512,9606.ENSP00000307235,9606.ENSP00000310170,9606.ENSP00000326737,9606.ENSP00000346508,9606.ENSP00000349041,9606.ENSP00000356438,9606.ENSP00000356954,9606.ENSP00000360266,9606.ENSP00000368683,9606.ENSP00000394085,9606.ENSP00000398736,9606.ENSP00000420612,9606.ENSP00000448665	XBP1,EREG,RAPGEF2,CXCL8,EIF2AK3,FOSL1,TNFRSF12A,PDGFA,NRARP,PTGS2,CTGF,JUN,EDN1,JMJD6,CYR61,TIPARP,DDIT3
GO:0031325	positive regulation of cellular metabolic process	51	3060	0.3	3.27e-05	9606.ENSP00000200453,9606.ENSP00000216037,9606.ENSP00000228437,9606.ENSP00000230990,9606.ENSP00000234420,9606.ENSP00000242480,9606.ENSP00000244869,9606.ENSP00000252818,9606.ENSP00000253063,9606.ENSP00000256458,9606.ENSP00000263062,9606.ENSP00000263339,9606.ENSP00000264431,9606.ENSP00000264711,9606.ENSP00000265138,9606.ENSP00000268042,9606.ENSP00000273153,9606.ENSP00000305422,9606.ENSP00000307235,…	PPP1R15A,XBP1,PRDM4,HBEGF,MSH6,EGR2,EREG,JUND,SESN2,IRAK2,EPC1,IL1A,RAPGEF2,DNAJC27,ARRDC3,ARRDC4,CSRNP1,CEBPB,EIF2AK3,FOSL1,NFKBIB,RAB12,TASP1,ZBTB49,ATF3,INSIG1,MAFF,PDGFA,UVRAG,RASSF1,CREB5,PTGS2,CTGF,DUSP5,GADD45A,JUN,LONRF3,ANKRD1,IRS2,EDN1,XDH,HRH1,CYR61,HERPUD1,DCUN1D2,KLF6,DDIT3,DNAJC3,TNFAIP3,NR4A3,MAP3K14
GO:0051338	regulation of transferase activity	25	964	0.49	3.53e-05	9606.ENSP00000239223,9606.ENSP00000244869,9606.ENSP00000253063,9606.ENSP00000256458,9606.ENSP00000264431,9606.ENSP00000265138,9606.ENSP00000268042,9606.ENSP00000277746,9606.ENSP00000303706,9606.ENSP00000342344,9606.ENSP00000342924,9606.ENSP00000346508,9606.ENSP00000348455,9606.ENSP00000355866,9606.ENSP00000358596,9606.ENSP00000360025,9606.ENSP00000364591,9606.ENSP00000365016,9606.ENSP00000366702,…	DUSP1,EREG,SESN2,IRAK2,RAPGEF2,ARRDC3,ARRDC4,NRBF2,CDC25A,CCNYL1,MCPH1,PDGFA,UVRAG,DUSP10,DUSP5,GADD45A,TSPYL2,IRS2,ERRFI1,EDN1,CYR61,DCUN1D2,DNAJC3,TNFAIP3,MAP3K14
GO:0031327	negative regulation of cellular biosynthetic process	32	1479	0.41	3.96e-05	9606.ENSP00000216037,9606.ENSP00000230990,9606.ENSP00000239223,9606.ENSP00000244869,9606.ENSP00000252818,9606.ENSP00000253063,9606.ENSP00000256495,9606.ENSP00000263062,9606.ENSP00000264431,9606.ENSP00000264444,9606.ENSP00000270162,9606.ENSP00000297689,9606.ENSP00000305422,9606.ENSP00000307235,9606.ENSP00000307305,9606.ENSP00000322457,9606.ENSP00000338290,9606.ENSP00000342924,9606.ENSP00000344352,…	XBP1,HBEGF,DUSP1,EREG,JUND,SESN2,BHLHE40,EPC1,RAPGEF2,MXD1,SIK1,NFIL3,CEBPB,EIF2AK3,DDIT4,SIAH2,GZF1,MCPH1,ATF3,INSIG1,PDGFA,ZNF140,NRARP,JUN,ANKRD1,TSPYL2,ERRFI1,EDN1,VIMP,NFXL1,DDIT3,NR4A3
GO:0019219	regulation of nucleobase-containing compound metabolic process	62	4133	0.26	4.09e-05	9606.ENSP00000196489,9606.ENSP00000211936,9606.ENSP00000216037,9606.ENSP00000228437,9606.ENSP00000234420,9606.ENSP00000239223,9606.ENSP00000242480,9606.ENSP00000244869,9606.ENSP00000252818,9606.ENSP00000253063,9606.ENSP00000256458,9606.ENSP00000256495,9606.ENSP00000263062,9606.ENSP00000263339,9606.ENSP00000264444,9606.ENSP00000270162,9606.ENSP00000273153,9606.ENSP00000277746,9606.ENSP00000297689,…	ZNF416,ZNF184,XBP1,PRDM4,MSH6,DUSP1,EGR2,EREG,JUND,SESN2,IRAK2,BHLHE40,EPC1,IL1A,MXD1,SIK1,CSRNP1,NRBF2,NFIL3,ZNF57,CEBPB,SLC25A33,EIF2AK3,DDIT4,FOSL1,NFKBIB,SIAH2,ZNF543,RIPK4,ZNF555,GZF1,TASP1,ZBTB49,ZNF823,MCPH1,ATF3,INSIG1,MAFF,ZNF140,NRARP,CREB5,ZSCAN12,TSC22D2,PTBP2,JUN,ANKRD1,ZBTB43,TSPYL2,ZNF165,EDN1,ZMYM5,PDP1,ZNF527,JMJD6,CYR61,KLF6,NFXL1,USP36,DDIT3,ZNF699,TNFAIP3,NR4A3
GO:0010556	regulation of macromolecule biosynthetic process	62	4143	0.25	4.38e-05	9606.ENSP00000196489,9606.ENSP00000200453,9606.ENSP00000211936,9606.ENSP00000216037,9606.ENSP00000228437,9606.ENSP00000230990,9606.ENSP00000239223,9606.ENSP00000242480,9606.ENSP00000244869,9606.ENSP00000252818,9606.ENSP00000253063,9606.ENSP00000256458,9606.ENSP00000256495,9606.ENSP00000263062,9606.ENSP00000263339,9606.ENSP00000264444,9606.ENSP00000270162,9606.ENSP00000273153,9606.ENSP00000277746,…	ZNF416,PPP1R15A,ZNF184,XBP1,PRDM4,HBEGF,DUSP1,EGR2,EREG,JUND,SESN2,IRAK2,BHLHE40,EPC1,IL1A,MXD1,SIK1,CSRNP1,NRBF2,NFIL3,ZNF57,CEBPB,EIF2AK3,FOSL1,NFKBIB,SIAH2,ZNF543,RIPK4,ZNF555,GZF1,TASP1,ZBTB49,ZNF823,MCPH1,ATF3,INSIG1,MAFF,ZNF140,NRARP,CREB5,ZSCAN12,TSC22D2,JUN,ANKRD1,ZBTB43,TSPYL2,IRS2,ZNF165,ERRFI1,EDN1,ZMYM5,VIMP,ZNF527,JMJD6,CYR61,KLF6,NFXL1,DDIT3,ZNF699,DNAJC3,TNFAIP3,NR4A3
GO:0071704	organic substance metabolic process	107	9135	0.15	5.14e-05	9606.ENSP00000075120,9606.ENSP00000196489,9606.ENSP00000200453,9606.ENSP00000211936,9606.ENSP00000216037,9606.ENSP00000222803,9606.ENSP00000228437,9606.ENSP00000230990,9606.ENSP00000234420,9606.ENSP00000239223,9606.ENSP00000242480,9606.ENSP00000244869,9606.ENSP00000249356,9606.ENSP00000252818,9606.ENSP00000253063,9606.ENSP00000255304,9606.ENSP00000256458,9606.ENSP00000256495,9606.ENSP00000258654,…	SLC2A3,ZNF416,PPP1R15A,ZNF184,XBP1,FKBP14,PRDM4,HBEGF,MSH6,DUSP1,EGR2,EREG,DNAJB9,JUND,SESN2,USPL1,IRAK2,BHLHE40,COG3,MAPK6,EPC1,RAPGEF2,MXD1,ARRDC4,SIK1,CSRNP1,NRBF2,ZC3H12C,TRIM36,RP9,SLC25A32,NFIL3,ZNF57,CDC25A,CEBPB,SLC25A33,CXCL8,EIF2AK3,FOSL1,FUT1,NFKBIB,SIAH2,ZNF543,RAB12,RIPK4,NDEL1,ZNF555,GZF1,TASP1,ZBTB49,ZNF823,ATF3,INSIG1,MAFF,PDGFA,ZNF140,UVRAG,CREB5,FUT4,PIM3,ZSCAN12,DUSP10,PTGS2,UA…
GO:1901700	response to oxygen-containing compound	31	1427	0.42	5.15e-05	9606.ENSP00000216037,9606.ENSP00000227752,9606.ENSP00000239223,9606.ENSP00000242480,9606.ENSP00000244869,9606.ENSP00000252818,9606.ENSP00000253063,9606.ENSP00000256458,9606.ENSP00000264431,9606.ENSP00000296026,9606.ENSP00000305422,9606.ENSP00000306328,9606.ENSP00000306512,9606.ENSP00000307305,9606.ENSP00000310170,9606.ENSP00000312988,9606.ENSP00000333982,9606.ENSP00000344741,9606.ENSP00000355866,…	XBP1,IL10RA,DUSP1,EGR2,EREG,JUND,SESN2,IRAK2,RAPGEF2,CXCL3,CEBPB,SLC25A33,CXCL8,DDIT4,FOSL1,NFKBIB,NDEL1,INSIG1,DUSP10,PTGS2,CTGF,JUN,ANKRD1,IRS2,ERRFI1,EDN1,VIMP,CXCL2,CRYAB,TNFAIP3,NR4A3
GO:0048583	regulation of response to stimulus	59	3882	0.26	5.37e-05	9606.ENSP00000200453,9606.ENSP00000216037,9606.ENSP00000230990,9606.ENSP00000234420,9606.ENSP00000239223,9606.ENSP00000244869,9606.ENSP00000249356,9606.ENSP00000253063,9606.ENSP00000256458,9606.ENSP00000259874,9606.ENSP00000263339,9606.ENSP00000264431,9606.ENSP00000264711,9606.ENSP00000265138,9606.ENSP00000296026,9606.ENSP00000306512,9606.ENSP00000307235,9606.ENSP00000307305,9606.ENSP00000321026,…	PPP1R15A,XBP1,HBEGF,MSH6,DUSP1,EREG,DNAJB9,SESN2,IRAK2,IER3,IL1A,RAPGEF2,DNAJC27,ARRDC3,CXCL3,CXCL8,EIF2AK3,DDIT4,LURAP1L,SIAH2,TNFRSF12A,NDEL1,MCPH1,ATF3,INSIG1,PDGFA,NRARP,PIM3,LRIG2,DUSP10,PTGS2,RGS16,CTGF,MCL1,ADRB1,DUSP5,GADD45A,JUN,ANKRD1,TSPYL2,IRS2,ERRFI1,EDN1,XDH,VIMP,CYR61,SYBU,HERPUD1,SELK,CDKN2AIP,CXCL2,MANF,CRYAB,FICD,DDIT3,DNAJC3,TNFAIP3,NR4A3,MAP3K14
GO:1902531	regulation of intracellular signal transduction	35	1764	0.38	6.87e-05	9606.ENSP00000216037,9606.ENSP00000230990,9606.ENSP00000239223,9606.ENSP00000244869,9606.ENSP00000253063,9606.ENSP00000256458,9606.ENSP00000259874,9606.ENSP00000264431,9606.ENSP00000264711,9606.ENSP00000265138,9606.ENSP00000307235,9606.ENSP00000307305,9606.ENSP00000321026,9606.ENSP00000344352,9606.ENSP00000346508,9606.ENSP00000355866,9606.ENSP00000356438,9606.ENSP00000356954,9606.ENSP00000358022,…	XBP1,HBEGF,DUSP1,EREG,SESN2,IRAK2,IER3,RAPGEF2,DNAJC27,ARRDC3,EIF2AK3,DDIT4,LURAP1L,ATF3,PDGFA,DUSP10,PTGS2,CTGF,MCL1,ADRB1,DUSP5,GADD45A,JUN,ANKRD1,IRS2,ERRFI1,EDN1,XDH,VIMP,CYR61,HERPUD1,SELK,DDIT3,TNFAIP3,MAP3K14
GO:0008152	metabolic process	110	9569	0.14	7.17e-05	9606.ENSP00000075120,9606.ENSP00000196489,9606.ENSP00000200453,9606.ENSP00000211936,9606.ENSP00000216037,9606.ENSP00000222803,9606.ENSP00000228437,9606.ENSP00000230990,9606.ENSP00000234420,9606.ENSP00000239223,9606.ENSP00000242480,9606.ENSP00000244869,9606.ENSP00000249356,9606.ENSP00000252818,9606.ENSP00000253063,9606.ENSP00000255304,9606.ENSP00000256458,9606.ENSP00000256495,9606.ENSP00000258654,…	SLC2A3,ZNF416,PPP1R15A,ZNF184,XBP1,FKBP14,PRDM4,HBEGF,MSH6,DUSP1,EGR2,EREG,DNAJB9,JUND,SESN2,USPL1,IRAK2,BHLHE40,COG3,MAPK6,EPC1,RAPGEF2,MXD1,ARRDC4,SIK1,SLC20A1,CSRNP1,NRBF2,ZC3H12C,TRIM36,RP9,SLC25A32,NFIL3,ZNF57,CDC25A,CEBPB,SLC25A33,CXCL8,EIF2AK3,DDIT4,FOSL1,FUT1,NFKBIB,SIAH2,ZNF543,RAB12,RIPK4,NDEL1,ZNF555,GZF1,TASP1,ZBTB49,ZNF823,ATF3,INSIG1,MAFF,PDGFA,ZNF140,UVRAG,CREB5,FUT4,PIM3,ZSCAN12,D…
GO:0010243	response to organonitrogen compound	23	876	0.5	7.21e-05	9606.ENSP00000216037,9606.ENSP00000239223,9606.ENSP00000242480,9606.ENSP00000244869,9606.ENSP00000249356,9606.ENSP00000252818,9606.ENSP00000253063,9606.ENSP00000264431,9606.ENSP00000305422,9606.ENSP00000306328,9606.ENSP00000310170,9606.ENSP00000333982,9606.ENSP00000356438,9606.ENSP00000356954,9606.ENSP00000360266,9606.ENSP00000365016,9606.ENSP00000366702,9606.ENSP00000368683,9606.ENSP00000380247,…	XBP1,DUSP1,EGR2,EREG,DNAJB9,JUND,SESN2,RAPGEF2,CEBPB,SLC25A33,FOSL1,NDEL1,PTGS2,CTGF,JUN,IRS2,ERRFI1,EDN1,HRH1,VIMP,HERPUD1,TNFAIP3,NR4A3
GO:0010604	positive regulation of macromolecule metabolic process	50	3081	0.29	7.91e-05	9606.ENSP00000200453,9606.ENSP00000216037,9606.ENSP00000228437,9606.ENSP00000230990,9606.ENSP00000234420,9606.ENSP00000242480,9606.ENSP00000244869,9606.ENSP00000252818,9606.ENSP00000253063,9606.ENSP00000256458,9606.ENSP00000263062,9606.ENSP00000263339,9606.ENSP00000264431,9606.ENSP00000264711,9606.ENSP00000265138,9606.ENSP00000268042,9606.ENSP00000273153,9606.ENSP00000297689,9606.ENSP00000305422,…	PPP1R15A,XBP1,PRDM4,HBEGF,MSH6,EGR2,EREG,JUND,SESN2,IRAK2,EPC1,IL1A,RAPGEF2,DNAJC27,ARRDC3,ARRDC4,CSRNP1,NFIL3,CEBPB,EIF2AK3,FOSL1,NFKBIB,TASP1,ZBTB49,ATF3,INSIG1,MAFF,PDGFA,RASSF1,CREB5,PTGS2,CTGF,DUSP5,GADD45A,JUN,LONRF3,ANKRD1,IRS2,EDN1,XDH,CYR61,HERPUD1,DCUN1D2,KLF6,TIPARP,DDIT3,DNAJC3,TNFAIP3,NR4A3,MAP3K14
GO:0048519	negative regulation of biological process	69	4953	0.22	8.8e-05	9606.ENSP00000200453,9606.ENSP00000216037,9606.ENSP00000230990,9606.ENSP00000234420,9606.ENSP00000239223,9606.ENSP00000244869,9606.ENSP00000249356,9606.ENSP00000252818,9606.ENSP00000253063,9606.ENSP00000256458,9606.ENSP00000256495,9606.ENSP00000259874,9606.ENSP00000263062,9606.ENSP00000263339,9606.ENSP00000264431,9606.ENSP00000264444,9606.ENSP00000265138,9606.ENSP00000270162,9606.ENSP00000286760,…	PPP1R15A,XBP1,HBEGF,MSH6,DUSP1,EREG,DNAJB9,JUND,SESN2,IRAK2,BHLHE40,IER3,EPC1,IL1A,RAPGEF2,MXD1,ARRDC3,SIK1,WHAMM,NFIL3,CEBPB,CXCL8,EIF2AK3,DDIT4,FOSL1,SIAH2,GZF1,ZBTB49,MCPH1,ATF3,INSIG1,PDGFA,ZNF140,NRARP,RASSF1,PIM3,LRIG2,DUSP10,PTGS2,RGS16,CTGF,MCL1,ADRB1,DUSP5,PTBP2,GADD45A,JUN,ANKRD1,YRDC,TSPYL2,IRS2,ERRFI1,EDN1,XDH,VIMP,HERC1,CYR61,NABP1,HERPUD1,TIPARP,NFXL1,CDKN2AIP,CRYAB,USP36,FICD,DDIT3…
GO:0001525	angiogenesis	13	297	0.72	9.17e-05	9606.ENSP00000216037,9606.ENSP00000244869,9606.ENSP00000306512,9606.ENSP00000307235,9606.ENSP00000326737,9606.ENSP00000346508,9606.ENSP00000349041,9606.ENSP00000356438,9606.ENSP00000356954,9606.ENSP00000360266,9606.ENSP00000368683,9606.ENSP00000394085,9606.ENSP00000398736	XBP1,EREG,CXCL8,EIF2AK3,TNFRSF12A,PDGFA,NRARP,PTGS2,CTGF,JUN,EDN1,JMJD6,CYR61
GO:0048523	negative regulation of cellular process	64	4454	0.24	9.23e-05	9606.ENSP00000200453,9606.ENSP00000216037,9606.ENSP00000230990,9606.ENSP00000234420,9606.ENSP00000239223,9606.ENSP00000244869,9606.ENSP00000249356,9606.ENSP00000252818,9606.ENSP00000253063,9606.ENSP00000256495,9606.ENSP00000259874,9606.ENSP00000263062,9606.ENSP00000263339,9606.ENSP00000264431,9606.ENSP00000264444,9606.ENSP00000265138,9606.ENSP00000270162,9606.ENSP00000286760,9606.ENSP00000297689,…	PPP1R15A,XBP1,HBEGF,MSH6,DUSP1,EREG,DNAJB9,JUND,SESN2,BHLHE40,IER3,EPC1,IL1A,RAPGEF2,MXD1,ARRDC3,SIK1,WHAMM,NFIL3,CEBPB,CXCL8,EIF2AK3,DDIT4,FOSL1,SIAH2,GZF1,ZBTB49,MCPH1,ATF3,INSIG1,PDGFA,ZNF140,NRARP,RASSF1,PIM3,LRIG2,DUSP10,PTGS2,RGS16,CTGF,MCL1,DUSP5,PTBP2,GADD45A,JUN,ANKRD1,TSPYL2,IRS2,ERRFI1,EDN1,XDH,VIMP,HERC1,CYR61,NABP1,HERPUD1,NFXL1,CDKN2AIP,CRYAB,USP36,DDIT3,DNAJC3,TNFAIP3,NR4A3
GO:0010941	regulation of cell death	33	1638	0.38	9.58e-05	9606.ENSP00000216037,9606.ENSP00000239223,9606.ENSP00000252818,9606.ENSP00000259874,9606.ENSP00000263339,9606.ENSP00000264431,9606.ENSP00000270162,9606.ENSP00000305422,9606.ENSP00000307235,9606.ENSP00000307305,9606.ENSP00000310170,9606.ENSP00000322457,9606.ENSP00000326737,9606.ENSP00000344352,9606.ENSP00000353824,9606.ENSP00000356438,9606.ENSP00000356954,9606.ENSP00000358022,9606.ENSP00000360025,…	XBP1,DUSP1,JUND,IER3,IL1A,RAPGEF2,SIK1,CEBPB,EIF2AK3,DDIT4,FOSL1,SIAH2,TNFRSF12A,ATF3,PIM3,PTGS2,CTGF,MCL1,GADD45A,JUN,ANKRD1,IRS2,EDN1,XDH,VIMP,CYR61,HERPUD1,CRYAB,DDIT3,DNAJC3,TNFAIP3,NR4A3,MAP3K14
GO:0042981	regulation of apoptotic process	31	1501	0.39	0.00012	9606.ENSP00000216037,9606.ENSP00000239223,9606.ENSP00000259874,9606.ENSP00000263339,9606.ENSP00000264431,9606.ENSP00000270162,9606.ENSP00000305422,9606.ENSP00000307235,9606.ENSP00000310170,9606.ENSP00000322457,9606.ENSP00000326737,9606.ENSP00000344352,9606.ENSP00000353824,9606.ENSP00000356438,9606.ENSP00000356954,9606.ENSP00000358022,9606.ENSP00000360025,9606.ENSP00000360266,9606.ENSP00000360762,…	XBP1,DUSP1,IER3,IL1A,RAPGEF2,SIK1,CEBPB,EIF2AK3,FOSL1,SIAH2,TNFRSF12A,ATF3,PIM3,PTGS2,CTGF,MCL1,GADD45A,JUN,ANKRD1,IRS2,EDN1,XDH,VIMP,CYR61,HERPUD1,CRYAB,DDIT3,DNAJC3,TNFAIP3,NR4A3,MAP3K14
GO:0051173	positive regulation of nitrogen compound metabolic process	48	2946	0.29	0.00012	9606.ENSP00000200453,9606.ENSP00000216037,9606.ENSP00000228437,9606.ENSP00000230990,9606.ENSP00000234420,9606.ENSP00000242480,9606.ENSP00000244869,9606.ENSP00000252818,9606.ENSP00000253063,9606.ENSP00000256458,9606.ENSP00000263062,9606.ENSP00000263339,9606.ENSP00000264431,9606.ENSP00000264711,9606.ENSP00000265138,9606.ENSP00000268042,9606.ENSP00000273153,9606.ENSP00000305422,9606.ENSP00000307235,…	PPP1R15A,XBP1,PRDM4,HBEGF,MSH6,EGR2,EREG,JUND,SESN2,IRAK2,EPC1,IL1A,RAPGEF2,DNAJC27,ARRDC3,ARRDC4,CSRNP1,CEBPB,EIF2AK3,FOSL1,NFKBIB,TASP1,ZBTB49,ATF3,INSIG1,MAFF,PDGFA,RASSF1,CREB5,PTGS2,CTGF,DUSP5,GADD45A,JUN,LONRF3,ANKRD1,EDN1,XDH,CYR61,HERPUD1,DCUN1D2,KLF6,TIPARP,DDIT3,DNAJC3,TNFAIP3,NR4A3,MAP3K14
GO:0043434	response to peptide hormone	14	362	0.67	0.00014	9606.ENSP00000216037,9606.ENSP00000242480,9606.ENSP00000244869,9606.ENSP00000252818,9606.ENSP00000253063,9606.ENSP00000306328,9606.ENSP00000333982,9606.ENSP00000356438,9606.ENSP00000356954,9606.ENSP00000365016,9606.ENSP00000366702,9606.ENSP00000368683,9606.ENSP00000381282,9606.ENSP00000482027	XBP1,EGR2,EREG,JUND,SESN2,SLC25A33,NDEL1,PTGS2,CTGF,IRS2,ERRFI1,EDN1,VIMP,NR4A3
GO:0043549	regulation of kinase activity	22	849	0.49	0.00014	9606.ENSP00000239223,9606.ENSP00000244869,9606.ENSP00000253063,9606.ENSP00000256458,9606.ENSP00000264431,9606.ENSP00000277746,9606.ENSP00000303706,9606.ENSP00000342344,9606.ENSP00000342924,9606.ENSP00000346508,9606.ENSP00000348455,9606.ENSP00000355866,9606.ENSP00000358596,9606.ENSP00000360025,9606.ENSP00000364591,9606.ENSP00000365016,9606.ENSP00000366702,9606.ENSP00000368683,9606.ENSP00000398736,…	DUSP1,EREG,SESN2,IRAK2,RAPGEF2,NRBF2,CDC25A,CCNYL1,MCPH1,PDGFA,UVRAG,DUSP10,DUSP5,GADD45A,TSPYL2,IRS2,ERRFI1,EDN1,CYR61,DNAJC3,TNFAIP3,MAP3K14
GO:0071216	cellular response to biotic stimulus	10	176	0.83	0.00015	9606.ENSP00000216037,9606.ENSP00000256458,9606.ENSP00000305422,9606.ENSP00000306512,9606.ENSP00000307235,9606.ENSP00000312988,9606.ENSP00000360762,9606.ENSP00000381282,9606.ENSP00000448665,9606.ENSP00000481570	XBP1,IRAK2,CEBPB,CXCL8,EIF2AK3,NFKBIB,ANKRD1,VIMP,DDIT3,TNFAIP3
GO:1903573	negative regulation of response to endoplasmic reticulum stress	6	44	1.21	0.00015	9606.ENSP00000200453,9606.ENSP00000216037,9606.ENSP00000249356,9606.ENSP00000381282,9606.ENSP00000409555,9606.ENSP00000473631	PPP1R15A,XBP1,DNAJB9,VIMP,HERPUD1,DNAJC3
GO:0001932	regulation of protein phosphorylation	29	1370	0.4	0.00016	9606.ENSP00000216037,9606.ENSP00000230990,9606.ENSP00000239223,9606.ENSP00000244869,9606.ENSP00000253063,9606.ENSP00000256458,9606.ENSP00000264431,9606.ENSP00000264711,9606.ENSP00000303706,9606.ENSP00000307235,9606.ENSP00000307305,9606.ENSP00000342344,9606.ENSP00000344352,9606.ENSP00000346508,9606.ENSP00000348455,9606.ENSP00000355866,9606.ENSP00000356438,9606.ENSP00000356954,9606.ENSP00000358596,…	XBP1,HBEGF,DUSP1,EREG,SESN2,IRAK2,RAPGEF2,DNAJC27,CDC25A,EIF2AK3,DDIT4,CCNYL1,ATF3,PDGFA,UVRAG,DUSP10,PTGS2,CTGF,DUSP5,GADD45A,JUN,TSPYL2,ERRFI1,EDN1,XDH,CYR61,DNAJC3,TNFAIP3,MAP3K14
GO:0010942	positive regulation of cell death	19	663	0.54	0.00016	9606.ENSP00000216037,9606.ENSP00000239223,9606.ENSP00000264431,9606.ENSP00000270162,9606.ENSP00000307235,9606.ENSP00000307305,9606.ENSP00000310170,9606.ENSP00000326737,9606.ENSP00000344352,9606.ENSP00000356438,9606.ENSP00000356954,9606.ENSP00000358022,9606.ENSP00000360025,9606.ENSP00000360266,9606.ENSP00000360762,9606.ENSP00000368727,9606.ENSP00000398736,9606.ENSP00000448665,9606.ENSP00000482027	XBP1,DUSP1,RAPGEF2,SIK1,EIF2AK3,DDIT4,FOSL1,TNFRSF12A,ATF3,PTGS2,CTGF,MCL1,GADD45A,JUN,ANKRD1,XDH,CYR61,DDIT3,NR4A3
GO:0042221	response to chemical	60	4153	0.24	0.00017	9606.ENSP00000216037,9606.ENSP00000222803,9606.ENSP00000227752,9606.ENSP00000230990,9606.ENSP00000239223,9606.ENSP00000242480,9606.ENSP00000244869,9606.ENSP00000249356,9606.ENSP00000252818,9606.ENSP00000253063,9606.ENSP00000256458,9606.ENSP00000261845,9606.ENSP00000263339,9606.ENSP00000264431,9606.ENSP00000270162,9606.ENSP00000280612,9606.ENSP00000296026,9606.ENSP00000297578,9606.ENSP00000297689,…	XBP1,FKBP14,IL10RA,HBEGF,DUSP1,EGR2,EREG,DNAJB9,JUND,SESN2,IRAK2,MAPK6,IL1A,RAPGEF2,SIK1,SLC7A11,CXCL3,SLC25A32,NFIL3,CEBPB,SLC25A33,CXCL8,EIF2AK3,DDIT4,FOSL1,NFKBIB,SIAH2,TNFRSF12A,RAB12,NDEL1,ATF3,INSIG1,PDGFA,DUSP10,PTGS2,CTGF,MCL1,JUN,ANKRD1,SLC25A25,TSPYL2,IRS2,ERRFI1,EDN1,PIGA,SEC31A,HRH1,VIMP,CYR61,HERPUD1,TIPARP,CXCL2,MANF,CRYAB,FICD,DDIT3,DNAJC3,TNFAIP3,NR4A3,MAP3K14
GO:0043065	positive regulation of apoptotic process	18	604	0.55	0.00017	9606.ENSP00000216037,9606.ENSP00000239223,9606.ENSP00000264431,9606.ENSP00000270162,9606.ENSP00000307235,9606.ENSP00000310170,9606.ENSP00000326737,9606.ENSP00000344352,9606.ENSP00000356438,9606.ENSP00000356954,9606.ENSP00000358022,9606.ENSP00000360025,9606.ENSP00000360266,9606.ENSP00000360762,9606.ENSP00000368727,9606.ENSP00000398736,9606.ENSP00000448665,9606.ENSP00000482027	XBP1,DUSP1,RAPGEF2,SIK1,EIF2AK3,FOSL1,TNFRSF12A,ATF3,PTGS2,CTGF,MCL1,GADD45A,JUN,ANKRD1,XDH,CYR61,DDIT3,NR4A3
GO:2000112	regulation of cellular macromolecule biosynthetic process	59	4050	0.24	0.00017	9606.ENSP00000196489,9606.ENSP00000200453,9606.ENSP00000211936,9606.ENSP00000216037,9606.ENSP00000228437,9606.ENSP00000230990,9606.ENSP00000239223,9606.ENSP00000242480,9606.ENSP00000244869,9606.ENSP00000252818,9606.ENSP00000253063,9606.ENSP00000256458,9606.ENSP00000256495,9606.ENSP00000263062,9606.ENSP00000263339,9606.ENSP00000264444,9606.ENSP00000270162,9606.ENSP00000273153,9606.ENSP00000277746,…	ZNF416,PPP1R15A,ZNF184,XBP1,PRDM4,HBEGF,DUSP1,EGR2,EREG,JUND,SESN2,IRAK2,BHLHE40,EPC1,IL1A,MXD1,SIK1,CSRNP1,NRBF2,NFIL3,ZNF57,CEBPB,EIF2AK3,FOSL1,ZNF543,RIPK4,ZNF555,GZF1,TASP1,ZBTB49,ZNF823,MCPH1,ATF3,INSIG1,MAFF,ZNF140,NRARP,CREB5,ZSCAN12,TSC22D2,JUN,ANKRD1,ZBTB43,TSPYL2,IRS2,ZNF165,EDN1,ZMYM5,VIMP,ZNF527,JMJD6,CYR61,KLF6,NFXL1,DDIT3,ZNF699,DNAJC3,TNFAIP3,NR4A3
GO:0010605	negative regulation of macromolecule metabolic process	43	2558	0.3	0.00018	9606.ENSP00000200453,9606.ENSP00000216037,9606.ENSP00000230990,9606.ENSP00000234420,9606.ENSP00000239223,9606.ENSP00000244869,9606.ENSP00000252818,9606.ENSP00000253063,9606.ENSP00000256495,9606.ENSP00000263062,9606.ENSP00000264444,9606.ENSP00000297689,9606.ENSP00000305422,9606.ENSP00000307235,9606.ENSP00000307305,9606.ENSP00000322457,9606.ENSP00000338290,9606.ENSP00000342924,9606.ENSP00000344352,…	PPP1R15A,XBP1,HBEGF,MSH6,DUSP1,EREG,JUND,SESN2,BHLHE40,EPC1,MXD1,NFIL3,CEBPB,EIF2AK3,DDIT4,SIAH2,GZF1,MCPH1,ATF3,ZNF140,NRARP,LRIG2,DUSP10,PTGS2,CTGF,DUSP5,PTBP2,GADD45A,JUN,ANKRD1,TSPYL2,ERRFI1,EDN1,XDH,VIMP,HERPUD1,TIPARP,NFXL1,CRYAB,DDIT3,DNAJC3,TNFAIP3,NR4A3
GO:1901652	response to peptide	15	431	0.62	0.00018	9606.ENSP00000216037,9606.ENSP00000242480,9606.ENSP00000244869,9606.ENSP00000252818,9606.ENSP00000253063,9606.ENSP00000306328,9606.ENSP00000333982,9606.ENSP00000356438,9606.ENSP00000356954,9606.ENSP00000365016,9606.ENSP00000366702,9606.ENSP00000368683,9606.ENSP00000381282,9606.ENSP00000481570,9606.ENSP00000482027	XBP1,EGR2,EREG,JUND,SESN2,SLC25A33,NDEL1,PTGS2,CTGF,IRS2,ERRFI1,EDN1,VIMP,TNFAIP3,NR4A3
GO:0009888	tissue development	32	1626	0.37	0.00019	9606.ENSP00000216037,9606.ENSP00000230990,9606.ENSP00000239223,9606.ENSP00000242480,9606.ENSP00000244869,9606.ENSP00000264431,9606.ENSP00000265138,9606.ENSP00000270162,9606.ENSP00000272542,9606.ENSP00000280612,9606.ENSP00000305422,9606.ENSP00000307235,9606.ENSP00000332454,9606.ENSP00000338290,9606.ENSP00000344352,9606.ENSP00000345393,9606.ENSP00000346508,9606.ENSP00000349041,9606.ENSP00000356438,…	XBP1,HBEGF,DUSP1,EGR2,EREG,RAPGEF2,ARRDC3,SIK1,SLC20A1,SLC7A11,CEBPB,EIF2AK3,RIPK4,GZF1,ATF3,MAFF,PDGFA,NRARP,PTGS2,CTGF,TUFT1,DUSP5,JUN,ANKRD1,SLC25A25,UGCG,ERRFI1,GPCPD1,EDN1,CYR61,TIPARP,NR4A3
GO:0036003	positive regulation of transcription from RNA polymerase II promoter in response to stress	5	26	1.36	0.00019	9606.ENSP00000216037,9606.ENSP00000253063,9606.ENSP00000305422,9606.ENSP00000344352,9606.ENSP00000448665	XBP1,SESN2,CEBPB,ATF3,DDIT3
GO:0048514	blood vessel morphogenesis	14	381	0.64	0.00019	9606.ENSP00000216037,9606.ENSP00000244869,9606.ENSP00000306512,9606.ENSP00000307235,9606.ENSP00000326737,9606.ENSP00000346508,9606.ENSP00000349041,9606.ENSP00000356438,9606.ENSP00000356954,9606.ENSP00000360266,9606.ENSP00000368683,9606.ENSP00000394085,9606.ENSP00000398736,9606.ENSP00000420612	XBP1,EREG,CXCL8,EIF2AK3,TNFRSF12A,PDGFA,NRARP,PTGS2,CTGF,JUN,EDN1,JMJD6,CYR61,TIPARP
GO:0051172	negative regulation of nitrogen compound metabolic process	40	2307	0.32	0.00019	9606.ENSP00000200453,9606.ENSP00000216037,9606.ENSP00000230990,9606.ENSP00000234420,9606.ENSP00000239223,9606.ENSP00000244869,9606.ENSP00000252818,9606.ENSP00000253063,9606.ENSP00000256495,9606.ENSP00000263062,9606.ENSP00000264444,9606.ENSP00000297689,9606.ENSP00000305422,9606.ENSP00000307235,9606.ENSP00000307305,9606.ENSP00000322457,9606.ENSP00000338290,9606.ENSP00000342924,9606.ENSP00000344352,…	PPP1R15A,XBP1,HBEGF,MSH6,DUSP1,EREG,JUND,SESN2,BHLHE40,EPC1,MXD1,NFIL3,CEBPB,EIF2AK3,DDIT4,SIAH2,GZF1,MCPH1,ATF3,ZNF140,NRARP,LRIG2,DUSP10,PTGS2,DUSP5,PTBP2,GADD45A,JUN,ANKRD1,TSPYL2,ERRFI1,EDN1,XDH,HERPUD1,NFXL1,CRYAB,DDIT3,DNAJC3,TNFAIP3,NR4A3
GO:0051252	regulation of RNA metabolic process	57	3890	0.25	0.00019	9606.ENSP00000196489,9606.ENSP00000211936,9606.ENSP00000216037,9606.ENSP00000228437,9606.ENSP00000242480,9606.ENSP00000244869,9606.ENSP00000252818,9606.ENSP00000253063,9606.ENSP00000256458,9606.ENSP00000256495,9606.ENSP00000263062,9606.ENSP00000263339,9606.ENSP00000264444,9606.ENSP00000270162,9606.ENSP00000273153,9606.ENSP00000277746,9606.ENSP00000297689,9606.ENSP00000303696,9606.ENSP00000305422,…	ZNF416,ZNF184,XBP1,PRDM4,EGR2,EREG,JUND,SESN2,IRAK2,BHLHE40,EPC1,IL1A,MXD1,SIK1,CSRNP1,NRBF2,NFIL3,ZNF57,CEBPB,EIF2AK3,FOSL1,NFKBIB,SIAH2,ZNF543,RIPK4,ZNF555,GZF1,TASP1,ZBTB49,ZNF823,MCPH1,ATF3,INSIG1,MAFF,ZNF140,NRARP,CREB5,ZSCAN12,TSC22D2,PTBP2,JUN,ANKRD1,ZBTB43,TSPYL2,ZNF165,EDN1,ZMYM5,ZNF527,JMJD6,CYR61,KLF6,NFXL1,USP36,DDIT3,ZNF699,TNFAIP3,NR4A3
GO:0072359	circulatory system development	21	807	0.49	0.00019	9606.ENSP00000216037,9606.ENSP00000244869,9606.ENSP00000263062,9606.ENSP00000264431,9606.ENSP00000270162,9606.ENSP00000306512,9606.ENSP00000307235,9606.ENSP00000310170,9606.ENSP00000326737,9606.ENSP00000346508,9606.ENSP00000349041,9606.ENSP00000356438,9606.ENSP00000356954,9606.ENSP00000360266,9606.ENSP00000360762,9606.ENSP00000366702,9606.ENSP00000368683,9606.ENSP00000394085,9606.ENSP00000398736,…	XBP1,EREG,EPC1,RAPGEF2,SIK1,CXCL8,EIF2AK3,FOSL1,TNFRSF12A,PDGFA,NRARP,PTGS2,CTGF,JUN,ANKRD1,ERRFI1,EDN1,JMJD6,CYR61,TIPARP,DDIT3
GO:1903506	regulation of nucleic acid-templated transcription	55	3683	0.25	0.00019	9606.ENSP00000196489,9606.ENSP00000211936,9606.ENSP00000216037,9606.ENSP00000228437,9606.ENSP00000242480,9606.ENSP00000244869,9606.ENSP00000252818,9606.ENSP00000253063,9606.ENSP00000256458,9606.ENSP00000256495,9606.ENSP00000263062,9606.ENSP00000263339,9606.ENSP00000264444,9606.ENSP00000270162,9606.ENSP00000273153,9606.ENSP00000277746,9606.ENSP00000297689,9606.ENSP00000303696,9606.ENSP00000305422,…	ZNF416,ZNF184,XBP1,PRDM4,EGR2,EREG,JUND,SESN2,IRAK2,BHLHE40,EPC1,IL1A,MXD1,SIK1,CSRNP1,NRBF2,NFIL3,ZNF57,CEBPB,EIF2AK3,FOSL1,NFKBIB,SIAH2,ZNF543,RIPK4,ZNF555,GZF1,TASP1,ZBTB49,ZNF823,MCPH1,ATF3,INSIG1,MAFF,ZNF140,NRARP,CREB5,ZSCAN12,TSC22D2,JUN,ANKRD1,ZBTB43,TSPYL2,ZNF165,EDN1,ZMYM5,ZNF527,JMJD6,CYR61,KLF6,NFXL1,DDIT3,ZNF699,TNFAIP3,NR4A3
GO:0048585	negative regulation of response to stimulus	30	1483	0.39	0.00021	9606.ENSP00000200453,9606.ENSP00000216037,9606.ENSP00000239223,9606.ENSP00000249356,9606.ENSP00000253063,9606.ENSP00000263339,9606.ENSP00000265138,9606.ENSP00000306512,9606.ENSP00000307305,9606.ENSP00000322457,9606.ENSP00000344352,9606.ENSP00000344741,9606.ENSP00000346508,9606.ENSP00000349041,9606.ENSP00000353824,9606.ENSP00000355396,9606.ENSP00000355866,9606.ENSP00000356438,9606.ENSP00000356529,…	PPP1R15A,XBP1,DUSP1,DNAJB9,SESN2,IL1A,ARRDC3,CXCL8,DDIT4,SIAH2,ATF3,INSIG1,PDGFA,NRARP,PIM3,LRIG2,DUSP10,PTGS2,RGS16,MCL1,DUSP5,ERRFI1,EDN1,XDH,VIMP,HERPUD1,DDIT3,DNAJC3,TNFAIP3,NR4A3
GO:0065009	regulation of molecular function	51	3322	0.27	0.00021	9606.ENSP00000200453,9606.ENSP00000230990,9606.ENSP00000234420,9606.ENSP00000239223,9606.ENSP00000244869,9606.ENSP00000253063,9606.ENSP00000256458,9606.ENSP00000256495,9606.ENSP00000263339,9606.ENSP00000264431,9606.ENSP00000265138,9606.ENSP00000268042,9606.ENSP00000270162,9606.ENSP00000277746,9606.ENSP00000296026,9606.ENSP00000303706,9606.ENSP00000306512,9606.ENSP00000307235,9606.ENSP00000310170,…	PPP1R15A,HBEGF,MSH6,DUSP1,EREG,SESN2,IRAK2,BHLHE40,IL1A,RAPGEF2,ARRDC3,ARRDC4,SIK1,NRBF2,CXCL3,CDC25A,CXCL8,EIF2AK3,FOSL1,SIAH2,RIPK4,NDEL1,CCNYL1,MCPH1,PDGFA,UVRAG,DUSP10,PTGS2,RGS16,CTGF,ADRB1,DUSP5,GADD45A,JUN,TSPYL2,IRS2,ERRFI1,EDN1,XDH,HERC1,CYR61,HERPUD1,DCUN1D2,CXCL2,MANF,CRYAB,FICD,DDIT3,DNAJC3,TNFAIP3,MAP3K14
GO:0007050	cell cycle arrest	9	149	0.86	0.00022	9606.ENSP00000200453,9606.ENSP00000239223,9606.ENSP00000286760,9606.ENSP00000306512,9606.ENSP00000338807,9606.ENSP00000342924,9606.ENSP00000349547,9606.ENSP00000360025,9606.ENSP00000448665	PPP1R15A,DUSP1,WHAMM,CXCL8,ZBTB49,MCPH1,RASSF1,GADD45A,DDIT3
GO:0009605	response to external stimulus	38	2152	0.33	0.00022	9606.ENSP00000216037,9606.ENSP00000227752,9606.ENSP00000230990,9606.ENSP00000242480,9606.ENSP00000252818,9606.ENSP00000253063,9606.ENSP00000256458,9606.ENSP00000256495,9606.ENSP00000270162,9606.ENSP00000296026,9606.ENSP00000305422,9606.ENSP00000306512,9606.ENSP00000307235,9606.ENSP00000307305,9606.ENSP00000310170,9606.ENSP00000312988,9606.ENSP00000322457,9606.ENSP00000331748,9606.ENSP00000344352,…	XBP1,IL10RA,HBEGF,EGR2,JUND,SESN2,IRAK2,BHLHE40,SIK1,CXCL3,CEBPB,CXCL8,EIF2AK3,DDIT4,FOSL1,NFKBIB,SIAH2,RAB12,ATF3,PDGFA,DUSP10,PTGS2,ADRB1,GADD45A,JUN,ANKRD1,SLC25A25,IRS2,EDN1,HRH1,VIMP,CYR61,CXCL2,DDIT3,DNAJC3,TNFAIP3,NR4A3,MAP3K14
GO:1903034	regulation of response to wounding	9	148	0.86	0.00022	9606.ENSP00000216037,9606.ENSP00000230990,9606.ENSP00000326737,9606.ENSP00000333982,9606.ENSP00000346508,9606.ENSP00000355396,9606.ENSP00000355866,9606.ENSP00000368683,9606.ENSP00000481570	XBP1,HBEGF,TNFRSF12A,NDEL1,PDGFA,LRIG2,DUSP10,EDN1,TNFAIP3
GO:0050790	regulation of catalytic activity	39	2249	0.32	0.00024	9606.ENSP00000200453,9606.ENSP00000234420,9606.ENSP00000239223,9606.ENSP00000244869,9606.ENSP00000253063,9606.ENSP00000256458,9606.ENSP00000264431,9606.ENSP00000265138,9606.ENSP00000268042,9606.ENSP00000277746,9606.ENSP00000303706,9606.ENSP00000307235,9606.ENSP00000322457,9606.ENSP00000333982,9606.ENSP00000342344,9606.ENSP00000342924,9606.ENSP00000346508,9606.ENSP00000348455,9606.ENSP00000355866,…	PPP1R15A,MSH6,DUSP1,EREG,SESN2,IRAK2,RAPGEF2,ARRDC3,ARRDC4,NRBF2,CDC25A,EIF2AK3,SIAH2,NDEL1,CCNYL1,MCPH1,PDGFA,UVRAG,DUSP10,PTGS2,RGS16,CTGF,ADRB1,DUSP5,GADD45A,JUN,TSPYL2,IRS2,ERRFI1,EDN1,XDH,CYR61,HERPUD1,DCUN1D2,CRYAB,FICD,DNAJC3,TNFAIP3,MAP3K14
GO:0048661	positive regulation of smooth muscle cell proliferation	7	80	1.02	0.00025	9606.ENSP00000216037,9606.ENSP00000230990,9606.ENSP00000244869,9606.ENSP00000356438,9606.ENSP00000360266,9606.ENSP00000368683,9606.ENSP00000482027	XBP1,HBEGF,EREG,PTGS2,JUN,EDN1,NR4A3
GO:1990440	positive regulation of transcription from RNA polymerase II promoter in response to endoplasmic reticulum stress	4	12	1.6	0.00025	9606.ENSP00000216037,9606.ENSP00000305422,9606.ENSP00000344352,9606.ENSP00000448665	XBP1,CEBPB,ATF3,DDIT3
GO:0030335	positive regulation of cell migration	15	452	0.6	0.00026	9606.ENSP00000216037,9606.ENSP00000230990,9606.ENSP00000263339,9606.ENSP00000264431,9606.ENSP00000296026,9606.ENSP00000306512,9606.ENSP00000346508,9606.ENSP00000356438,9606.ENSP00000360266,9606.ENSP00000365016,9606.ENSP00000368683,9606.ENSP00000398736,9606.ENSP00000418813,9606.ENSP00000427279,9606.ENSP00000482027	XBP1,HBEGF,IL1A,RAPGEF2,CXCL3,CXCL8,PDGFA,PTGS2,JUN,IRS2,EDN1,CYR61,SELK,CXCL2,NR4A3
GO:0036498	IRE1-mediated unfolded protein response	6	52	1.14	0.00026	9606.ENSP00000216037,9606.ENSP00000222803,9606.ENSP00000249356,9606.ENSP00000364591,9606.ENSP00000378721,9606.ENSP00000473631	XBP1,FKBP14,DNAJB9,TSPYL2,SEC31A,DNAJC3
GO:0009628	response to abiotic stimulus	24	1052	0.44	0.00027	9606.ENSP00000234420,9606.ENSP00000239223,9606.ENSP00000252818,9606.ENSP00000256495,9606.ENSP00000263339,9606.ENSP00000270162,9606.ENSP00000303706,9606.ENSP00000307235,9606.ENSP00000307305,9606.ENSP00000310170,9606.ENSP00000354543,9606.ENSP00000356438,9606.ENSP00000356954,9606.ENSP00000358301,9606.ENSP00000360025,9606.ENSP00000360266,9606.ENSP00000360762,9606.ENSP00000366702,9606.ENSP00000368683,…	MSH6,DUSP1,JUND,BHLHE40,IL1A,SIK1,CDC25A,EIF2AK3,DDIT4,FOSL1,TSC22D2,PTGS2,CTGF,ADRB1,GADD45A,JUN,ANKRD1,ERRFI1,EDN1,HRH1,NABP1,CRYAB,DNAJC3,MAP3K14
GO:1902532	negative regulation of intracellular signal transduction	16	514	0.57	0.00027	9606.ENSP00000216037,9606.ENSP00000239223,9606.ENSP00000253063,9606.ENSP00000265138,9606.ENSP00000307305,9606.ENSP00000344352,9606.ENSP00000355866,9606.ENSP00000356438,9606.ENSP00000358022,9606.ENSP00000358596,9606.ENSP00000366702,9606.ENSP00000368727,9606.ENSP00000381282,9606.ENSP00000409555,9606.ENSP00000448665,9606.ENSP00000481570	XBP1,DUSP1,SESN2,ARRDC3,DDIT4,ATF3,DUSP10,PTGS2,MCL1,DUSP5,ERRFI1,XDH,VIMP,HERPUD1,DDIT3,TNFAIP3
GO:0048856	anatomical structure development	68	5085	0.21	0.00031	9606.ENSP00000216037,9606.ENSP00000230990,9606.ENSP00000234420,9606.ENSP00000239223,9606.ENSP00000242480,9606.ENSP00000244869,9606.ENSP00000249356,9606.ENSP00000252818,9606.ENSP00000259874,9606.ENSP00000261845,9606.ENSP00000263062,9606.ENSP00000263339,9606.ENSP00000264431,9606.ENSP00000264444,9606.ENSP00000265138,9606.ENSP00000270162,9606.ENSP00000272542,9606.ENSP00000273153,9606.ENSP00000280551,…	XBP1,HBEGF,MSH6,DUSP1,EGR2,EREG,DNAJB9,JUND,IER3,MAPK6,EPC1,IL1A,RAPGEF2,MXD1,ARRDC3,SIK1,SLC20A1,CSRNP1,SEC24D,SLC7A11,CEBPB,CXCL8,EIF2AK3,DDIT4,FOSL1,SIAH2,TNFRSF12A,RIPK4,NDEL1,GZF1,MCPH1,ATF3,INSIG1,MAFF,PDGFA,NRARP,LRIG2,DUSP10,PTGS2,SUCO,CTGF,TUFT1,MCL1,DUSP5,PTBP2,JUN,PARD6B,ANKRD1,SLC25A25,UGCG,IRS2,ERRFI1,GPCPD1,EDN1,XDH,ZMYM5,HERC1,JMJD6,CYR61,SYBU,KLF6,TIPARP,PGM3,MANF,CRYAB,DDIT3,TNFA…
GO:0070059	intrinsic apoptotic signaling pathway in response to endoplasmic reticulum stress	5	31	1.29	0.00033	9606.ENSP00000200453,9606.ENSP00000216037,9606.ENSP00000305422,9606.ENSP00000418813,9606.ENSP00000448665	PPP1R15A,XBP1,CEBPB,SELK,DDIT3
GO:0006351	transcription, DNA-templated	42	2569	0.29	0.00037	9606.ENSP00000196489,9606.ENSP00000211936,9606.ENSP00000216037,9606.ENSP00000228437,9606.ENSP00000242480,9606.ENSP00000244869,9606.ENSP00000252818,9606.ENSP00000256495,9606.ENSP00000263062,9606.ENSP00000264444,9606.ENSP00000273153,9606.ENSP00000277746,9606.ENSP00000297689,9606.ENSP00000303696,9606.ENSP00000305422,9606.ENSP00000306328,9606.ENSP00000310170,9606.ENSP00000312988,9606.ENSP00000322545,…	ZNF416,ZNF184,XBP1,PRDM4,EGR2,EREG,JUND,BHLHE40,EPC1,MXD1,CSRNP1,NRBF2,NFIL3,ZNF57,CEBPB,SLC25A33,FOSL1,NFKBIB,ZNF543,ZNF555,GZF1,ZBTB49,ZNF823,ATF3,MAFF,ZNF140,CREB5,ZSCAN12,CTGF,JUN,ZBTB43,TSPYL2,ZNF165,ZMYM5,ZNF527,JMJD6,NABP1,KLF6,NFXL1,DDIT3,ZNF699,NR4A3
GO:1902235	regulation of endoplasmic reticulum stress-induced intrinsic apoptotic signaling pathway	5	32	1.27	0.00037	9606.ENSP00000216037,9606.ENSP00000307235,9606.ENSP00000381282,9606.ENSP00000409555,9606.ENSP00000448665	XBP1,EIF2AK3,VIMP,HERPUD1,DDIT3
GO:0048584	positive regulation of response to stimulus	36	2054	0.32	0.00041	9606.ENSP00000200453,9606.ENSP00000216037,9606.ENSP00000230990,9606.ENSP00000234420,9606.ENSP00000244869,9606.ENSP00000256458,9606.ENSP00000264431,9606.ENSP00000264711,9606.ENSP00000296026,9606.ENSP00000306512,9606.ENSP00000321026,9606.ENSP00000326737,9606.ENSP00000333982,9606.ENSP00000344352,9606.ENSP00000346508,9606.ENSP00000349041,9606.ENSP00000356438,9606.ENSP00000356954,9606.ENSP00000358022,…	PPP1R15A,XBP1,HBEGF,MSH6,EREG,IRAK2,RAPGEF2,DNAJC27,CXCL3,CXCL8,LURAP1L,TNFRSF12A,NDEL1,ATF3,PDGFA,NRARP,PTGS2,CTGF,MCL1,ADRB1,DUSP5,GADD45A,JUN,ANKRD1,IRS2,EDN1,XDH,CYR61,SYBU,HERPUD1,CDKN2AIP,CXCL2,DDIT3,TNFAIP3,NR4A3,MAP3K14
GO:0010468	regulation of gene expression	62	4533	0.22	0.00045	9606.ENSP00000196489,9606.ENSP00000200453,9606.ENSP00000211936,9606.ENSP00000216037,9606.ENSP00000228437,9606.ENSP00000242480,9606.ENSP00000244869,9606.ENSP00000252818,9606.ENSP00000253063,9606.ENSP00000256458,9606.ENSP00000256495,9606.ENSP00000261845,9606.ENSP00000263062,9606.ENSP00000263339,9606.ENSP00000264444,9606.ENSP00000270162,9606.ENSP00000273153,9606.ENSP00000277746,9606.ENSP00000297689,…	ZNF416,PPP1R15A,ZNF184,XBP1,PRDM4,EGR2,EREG,JUND,SESN2,IRAK2,BHLHE40,MAPK6,EPC1,IL1A,MXD1,SIK1,CSRNP1,NRBF2,NFIL3,ZNF57,CEBPB,EIF2AK3,FOSL1,ZNF543,RIPK4,ZNF555,GZF1,TASP1,ZBTB49,ZNF823,MCPH1,ATF3,INSIG1,MAFF,ZNF140,NRARP,CREB5,ZSCAN12,TSC22D2,CTGF,PTBP2,JUN,ANKRD1,ZBTB43,TSPYL2,ZNF165,EDN1,XDH,ZMYM5,ZNF527,JMJD6,CYR61,KLF6,TIPARP,NFXL1,CRYAB,USP36,DDIT3,ZNF699,DNAJC3,TNFAIP3,NR4A3
GO:0048660	regulation of smooth muscle cell proliferation	8	126	0.88	0.00045	9606.ENSP00000216037,9606.ENSP00000230990,9606.ENSP00000244869,9606.ENSP00000356438,9606.ENSP00000360266,9606.ENSP00000368683,9606.ENSP00000481570,9606.ENSP00000482027	XBP1,HBEGF,EREG,PTGS2,JUN,EDN1,TNFAIP3,NR4A3
GO:1902624	positive regulation of neutrophil migration	5	34	1.25	0.00046	9606.ENSP00000263339,9606.ENSP00000296026,9606.ENSP00000306512,9606.ENSP00000368683,9606.ENSP00000427279	IL1A,CXCL3,CXCL8,EDN1,CXCL2
GO:0010648	negative regulation of cell communication	26	1255	0.4	0.0005	9606.ENSP00000200453,9606.ENSP00000216037,9606.ENSP00000239223,9606.ENSP00000249356,9606.ENSP00000253063,9606.ENSP00000263339,9606.ENSP00000265138,9606.ENSP00000306512,9606.ENSP00000307305,9606.ENSP00000322457,9606.ENSP00000344352,9606.ENSP00000344741,9606.ENSP00000349041,9606.ENSP00000353824,9606.ENSP00000355866,9606.ENSP00000356438,9606.ENSP00000356529,9606.ENSP00000358022,9606.ENSP00000358596,…	PPP1R15A,XBP1,DUSP1,DNAJB9,SESN2,IL1A,ARRDC3,CXCL8,DDIT4,SIAH2,ATF3,INSIG1,NRARP,PIM3,DUSP10,PTGS2,RGS16,MCL1,DUSP5,ERRFI1,EDN1,XDH,VIMP,HERPUD1,DDIT3,TNFAIP3
GO:0023057	negative regulation of signaling	26	1258	0.39	0.00052	9606.ENSP00000200453,9606.ENSP00000216037,9606.ENSP00000239223,9606.ENSP00000249356,9606.ENSP00000253063,9606.ENSP00000263339,9606.ENSP00000265138,9606.ENSP00000306512,9606.ENSP00000307305,9606.ENSP00000322457,9606.ENSP00000344352,9606.ENSP00000344741,9606.ENSP00000349041,9606.ENSP00000353824,9606.ENSP00000355866,9606.ENSP00000356438,9606.ENSP00000356529,9606.ENSP00000358022,9606.ENSP00000358596,…	PPP1R15A,XBP1,DUSP1,DNAJB9,SESN2,IL1A,ARRDC3,CXCL8,DDIT4,SIAH2,ATF3,INSIG1,NRARP,PIM3,DUSP10,PTGS2,RGS16,MCL1,DUSP5,ERRFI1,EDN1,XDH,VIMP,HERPUD1,DDIT3,TNFAIP3
GO:0006355	regulation of transcription, DNA-templated	53	3661	0.24	0.00053	9606.ENSP00000196489,9606.ENSP00000211936,9606.ENSP00000216037,9606.ENSP00000228437,9606.ENSP00000242480,9606.ENSP00000244869,9606.ENSP00000252818,9606.ENSP00000253063,9606.ENSP00000256458,9606.ENSP00000256495,9606.ENSP00000263062,9606.ENSP00000263339,9606.ENSP00000264444,9606.ENSP00000270162,9606.ENSP00000273153,9606.ENSP00000277746,9606.ENSP00000297689,9606.ENSP00000303696,9606.ENSP00000305422,…	ZNF416,ZNF184,XBP1,PRDM4,EGR2,EREG,JUND,SESN2,IRAK2,BHLHE40,EPC1,IL1A,MXD1,SIK1,CSRNP1,NRBF2,NFIL3,ZNF57,CEBPB,EIF2AK3,FOSL1,ZNF543,RIPK4,ZNF555,GZF1,TASP1,ZBTB49,ZNF823,MCPH1,ATF3,INSIG1,MAFF,ZNF140,NRARP,CREB5,ZSCAN12,TSC22D2,JUN,ANKRD1,ZBTB43,TSPYL2,ZNF165,EDN1,ZMYM5,ZNF527,JMJD6,CYR61,KLF6,NFXL1,DDIT3,ZNF699,TNFAIP3,NR4A3
GO:0006979	response to oxidative stress	13	373	0.62	0.00053	9606.ENSP00000216037,9606.ENSP00000239223,9606.ENSP00000253063,9606.ENSP00000280612,9606.ENSP00000310170,9606.ENSP00000356438,9606.ENSP00000360266,9606.ENSP00000368683,9606.ENSP00000381282,9606.ENSP00000418813,9606.ENSP00000433560,9606.ENSP00000481570,9606.ENSP00000482027	XBP1,DUSP1,SESN2,SLC7A11,FOSL1,PTGS2,JUN,EDN1,VIMP,SELK,CRYAB,TNFAIP3,NR4A3
GO:0032502	developmental process	70	5401	0.19	0.00053	9606.ENSP00000216037,9606.ENSP00000230990,9606.ENSP00000234420,9606.ENSP00000239223,9606.ENSP00000242480,9606.ENSP00000244869,9606.ENSP00000249356,9606.ENSP00000252818,9606.ENSP00000259874,9606.ENSP00000261845,9606.ENSP00000263062,9606.ENSP00000263339,9606.ENSP00000264431,9606.ENSP00000264444,9606.ENSP00000265138,9606.ENSP00000270162,9606.ENSP00000272542,9606.ENSP00000273153,9606.ENSP00000280551,…	XBP1,HBEGF,MSH6,DUSP1,EGR2,EREG,DNAJB9,JUND,IER3,MAPK6,EPC1,IL1A,RAPGEF2,MXD1,ARRDC3,SIK1,SLC20A1,CSRNP1,SEC24D,SLC7A11,CEBPB,CXCL8,EIF2AK3,DDIT4,FOSL1,SIAH2,TNFRSF12A,RIPK4,NDEL1,GZF1,MCPH1,ATF3,INSIG1,MAFF,PDGFA,NRARP,LRIG2,DUSP10,PTGS2,SUCO,CTGF,TUFT1,MCL1,ADRB1,DUSP5,PTBP2,JUN,PARD6B,ANKRD1,SLC25A25,UGCG,IRS2,ERRFI1,GPCPD1,EDN1,XDH,ZMYM5,HERC1,JMJD6,CYR61,SYBU,SELK,KLF6,TIPARP,PGM3,MANF,CRYAB…
GO:0035970	peptidyl-threonine dephosphorylation	4	16	1.48	0.00053	9606.ENSP00000239223,9606.ENSP00000355866,9606.ENSP00000358596,9606.ENSP00000379503	DUSP1,DUSP10,DUSP5,PDP1
GO:0006357	regulation of transcription by RNA polymerase II	42	2633	0.28	0.00058	9606.ENSP00000196489,9606.ENSP00000211936,9606.ENSP00000216037,9606.ENSP00000228437,9606.ENSP00000242480,9606.ENSP00000252818,9606.ENSP00000253063,9606.ENSP00000256495,9606.ENSP00000263062,9606.ENSP00000263339,9606.ENSP00000264444,9606.ENSP00000273153,9606.ENSP00000297689,9606.ENSP00000303696,9606.ENSP00000305422,9606.ENSP00000310170,9606.ENSP00000322545,9606.ENSP00000334853,9606.ENSP00000338290,…	ZNF416,ZNF184,XBP1,PRDM4,EGR2,JUND,SESN2,BHLHE40,EPC1,IL1A,MXD1,CSRNP1,NFIL3,ZNF57,CEBPB,FOSL1,ZNF543,ZNF555,GZF1,ZBTB49,ZNF823,MCPH1,ATF3,INSIG1,MAFF,ZNF140,NRARP,CREB5,ZSCAN12,TSC22D2,JUN,ANKRD1,ZBTB43,ZNF165,EDN1,ZMYM5,CYR61,KLF6,NFXL1,DDIT3,ZNF699,NR4A3
GO:0042127	regulation of cell population proliferation	30	1594	0.35	0.0006	9606.ENSP00000216037,9606.ENSP00000230990,9606.ENSP00000239223,9606.ENSP00000244869,9606.ENSP00000252818,9606.ENSP00000263339,9606.ENSP00000264431,9606.ENSP00000296026,9606.ENSP00000305422,9606.ENSP00000306328,9606.ENSP00000306512,9606.ENSP00000310170,9606.ENSP00000338807,9606.ENSP00000344352,9606.ENSP00000346508,9606.ENSP00000349041,9606.ENSP00000355866,9606.ENSP00000356438,9606.ENSP00000356954,…	XBP1,HBEGF,DUSP1,EREG,JUND,IL1A,RAPGEF2,CXCL3,CEBPB,SLC25A33,CXCL8,FOSL1,ZBTB49,ATF3,PDGFA,NRARP,DUSP10,PTGS2,CTGF,PTBP2,JUN,IRS2,ERRFI1,EDN1,XDH,CYR61,SELK,CXCL2,TNFAIP3,NR4A3
GO:0070372	regulation of ERK1 and ERK2 cascade	11	274	0.68	0.00066	9606.ENSP00000216037,9606.ENSP00000239223,9606.ENSP00000264431,9606.ENSP00000264711,9606.ENSP00000344352,9606.ENSP00000346508,9606.ENSP00000355866,9606.ENSP00000356954,9606.ENSP00000360266,9606.ENSP00000366702,9606.ENSP00000398736	XBP1,DUSP1,RAPGEF2,DNAJC27,ATF3,PDGFA,DUSP10,CTGF,JUN,ERRFI1,CYR61
GO:0034654	nucleobase-containing compound biosynthetic process	46	3031	0.26	0.0007	9606.ENSP00000196489,9606.ENSP00000211936,9606.ENSP00000216037,9606.ENSP00000228437,9606.ENSP00000242480,9606.ENSP00000244869,9606.ENSP00000252818,9606.ENSP00000256495,9606.ENSP00000263062,9606.ENSP00000264444,9606.ENSP00000273153,9606.ENSP00000277746,9606.ENSP00000297689,9606.ENSP00000303696,9606.ENSP00000305422,9606.ENSP00000306328,9606.ENSP00000310170,9606.ENSP00000312988,9606.ENSP00000322545,…	ZNF416,ZNF184,XBP1,PRDM4,EGR2,EREG,JUND,BHLHE40,EPC1,MXD1,CSRNP1,NRBF2,NFIL3,ZNF57,CEBPB,SLC25A33,FOSL1,NFKBIB,ZNF543,ZNF555,GZF1,ZBTB49,ZNF823,ATF3,MAFF,ZNF140,CREB5,ZSCAN12,PTGS2,UAP1,CTGF,JUN,ZBTB43,TSPYL2,ZNF165,XDH,ZMYM5,ZNF527,JMJD6,NABP1,KLF6,NFXL1,PGM3,DDIT3,ZNF699,NR4A3
GO:0043555	regulation of translation in response to stress	4	18	1.43	0.00072	9606.ENSP00000200453,9606.ENSP00000253063,9606.ENSP00000307235,9606.ENSP00000473631	PPP1R15A,SESN2,EIF2AK3,DNAJC3
GO:0007275	multicellular organism development	63	4726	0.2	0.00074	9606.ENSP00000216037,9606.ENSP00000230990,9606.ENSP00000234420,9606.ENSP00000239223,9606.ENSP00000242480,9606.ENSP00000244869,9606.ENSP00000249356,9606.ENSP00000261845,9606.ENSP00000263062,9606.ENSP00000264431,9606.ENSP00000264444,9606.ENSP00000265138,9606.ENSP00000270162,9606.ENSP00000272542,9606.ENSP00000273153,9606.ENSP00000280551,9606.ENSP00000280612,9606.ENSP00000305422,9606.ENSP00000306512,…	XBP1,HBEGF,MSH6,DUSP1,EGR2,EREG,DNAJB9,MAPK6,EPC1,RAPGEF2,MXD1,ARRDC3,SIK1,SLC20A1,CSRNP1,SEC24D,SLC7A11,CEBPB,CXCL8,EIF2AK3,DDIT4,FOSL1,SIAH2,TNFRSF12A,NDEL1,GZF1,MCPH1,ATF3,INSIG1,MAFF,PDGFA,NRARP,LRIG2,DUSP10,PTGS2,SUCO,CTGF,TUFT1,MCL1,DUSP5,PTBP2,JUN,PARD6B,ANKRD1,SLC25A25,IRS2,ERRFI1,GPCPD1,EDN1,XDH,ZMYM5,HERC1,JMJD6,CYR61,SYBU,KLF6,TIPARP,PGM3,MANF,CRYAB,DDIT3,TNFAIP3,NR4A3
GO:0051246	regulation of protein metabolic process	42	2668	0.28	0.00074	9606.ENSP00000200453,9606.ENSP00000216037,9606.ENSP00000230990,9606.ENSP00000239223,9606.ENSP00000244869,9606.ENSP00000253063,9606.ENSP00000256458,9606.ENSP00000263339,9606.ENSP00000264431,9606.ENSP00000264711,9606.ENSP00000265138,9606.ENSP00000268042,9606.ENSP00000303706,9606.ENSP00000305422,9606.ENSP00000307235,9606.ENSP00000307305,9606.ENSP00000322457,9606.ENSP00000342344,9606.ENSP00000344352,…	PPP1R15A,XBP1,HBEGF,DUSP1,EREG,SESN2,IRAK2,IL1A,RAPGEF2,DNAJC27,ARRDC3,ARRDC4,CDC25A,CEBPB,EIF2AK3,DDIT4,SIAH2,CCNYL1,ATF3,PDGFA,UVRAG,RASSF1,LRIG2,DUSP10,PTGS2,CTGF,DUSP5,GADD45A,JUN,LONRF3,TSPYL2,ERRFI1,EDN1,XDH,CYR61,HERPUD1,DCUN1D2,TIPARP,CRYAB,DNAJC3,TNFAIP3,MAP3K14
GO:0043618	regulation of transcription from RNA polymerase II promoter in response to stress	6	67	1.03	0.00075	9606.ENSP00000216037,9606.ENSP00000253063,9606.ENSP00000305422,9606.ENSP00000344352,9606.ENSP00000360266,9606.ENSP00000448665	XBP1,SESN2,CEBPB,ATF3,JUN,DDIT3
GO:0009891	positive regulation of biosynthetic process	33	1876	0.32	0.00079	9606.ENSP00000200453,9606.ENSP00000216037,9606.ENSP00000228437,9606.ENSP00000242480,9606.ENSP00000244869,9606.ENSP00000252818,9606.ENSP00000253063,9606.ENSP00000263062,9606.ENSP00000263339,9606.ENSP00000273153,9606.ENSP00000305422,9606.ENSP00000307235,9606.ENSP00000310170,9606.ENSP00000312988,9606.ENSP00000338624,9606.ENSP00000338807,9606.ENSP00000344352,9606.ENSP00000344741,9606.ENSP00000345393,…	PPP1R15A,XBP1,PRDM4,EGR2,EREG,JUND,SESN2,EPC1,IL1A,CSRNP1,CEBPB,EIF2AK3,FOSL1,NFKBIB,TASP1,ZBTB49,ATF3,INSIG1,MAFF,CREB5,PTGS2,SUCO,CTGF,JUN,ANKRD1,IRS2,EDN1,HRH1,CYR61,KLF6,DDIT3,DNAJC3,NR4A3
GO:0006366	transcription by RNA polymerase II	19	784	0.46	0.00087	9606.ENSP00000216037,9606.ENSP00000228437,9606.ENSP00000242480,9606.ENSP00000252818,9606.ENSP00000273153,9606.ENSP00000277746,9606.ENSP00000297689,9606.ENSP00000305422,9606.ENSP00000310170,9606.ENSP00000344352,9606.ENSP00000345393,9606.ENSP00000350359,9606.ENSP00000356954,9606.ENSP00000360266,9606.ENSP00000403683,9606.ENSP00000419923,9606.ENSP00000422037,9606.ENSP00000448665,9606.ENSP00000482027	XBP1,PRDM4,EGR2,JUND,CSRNP1,NRBF2,NFIL3,CEBPB,FOSL1,ATF3,MAFF,CREB5,CTGF,JUN,NABP1,KLF6,NFXL1,DDIT3,NR4A3
GO:0009725	response to hormone	20	854	0.45	0.00087	9606.ENSP00000216037,9606.ENSP00000239223,9606.ENSP00000242480,9606.ENSP00000244869,9606.ENSP00000252818,9606.ENSP00000253063,9606.ENSP00000270162,9606.ENSP00000306328,9606.ENSP00000307305,9606.ENSP00000310170,9606.ENSP00000333982,9606.ENSP00000356438,9606.ENSP00000356954,9606.ENSP00000360266,9606.ENSP00000365016,9606.ENSP00000366702,9606.ENSP00000368683,9606.ENSP00000381282,9606.ENSP00000433560,…	XBP1,DUSP1,EGR2,EREG,JUND,SESN2,SIK1,SLC25A33,DDIT4,FOSL1,NDEL1,PTGS2,CTGF,JUN,IRS2,ERRFI1,EDN1,VIMP,CRYAB,NR4A3
GO:0045859	regulation of protein kinase activity	19	788	0.46	0.00092	9606.ENSP00000239223,9606.ENSP00000244869,9606.ENSP00000253063,9606.ENSP00000256458,9606.ENSP00000264431,9606.ENSP00000303706,9606.ENSP00000342344,9606.ENSP00000346508,9606.ENSP00000348455,9606.ENSP00000355866,9606.ENSP00000358596,9606.ENSP00000360025,9606.ENSP00000364591,9606.ENSP00000366702,9606.ENSP00000368683,9606.ENSP00000398736,9606.ENSP00000473631,9606.ENSP00000481570,9606.ENSP00000482657	DUSP1,EREG,SESN2,IRAK2,RAPGEF2,CDC25A,CCNYL1,PDGFA,UVRAG,DUSP10,DUSP5,GADD45A,TSPYL2,ERRFI1,EDN1,CYR61,DNAJC3,TNFAIP3,MAP3K14
GO:0009968	negative regulation of signal transduction	24	1160	0.4	0.00095	9606.ENSP00000200453,9606.ENSP00000216037,9606.ENSP00000239223,9606.ENSP00000249356,9606.ENSP00000253063,9606.ENSP00000263339,9606.ENSP00000265138,9606.ENSP00000306512,9606.ENSP00000307305,9606.ENSP00000322457,9606.ENSP00000344352,9606.ENSP00000344741,9606.ENSP00000349041,9606.ENSP00000355866,9606.ENSP00000356438,9606.ENSP00000356529,9606.ENSP00000358022,9606.ENSP00000358596,9606.ENSP00000366702,…	PPP1R15A,XBP1,DUSP1,DNAJB9,SESN2,IL1A,ARRDC3,CXCL8,DDIT4,SIAH2,ATF3,INSIG1,NRARP,DUSP10,PTGS2,RGS16,MCL1,DUSP5,ERRFI1,XDH,VIMP,HERPUD1,DDIT3,TNFAIP3
GO:0071222	cellular response to lipopolysaccharide	8	146	0.82	0.00099	9606.ENSP00000216037,9606.ENSP00000256458,9606.ENSP00000305422,9606.ENSP00000306512,9606.ENSP00000312988,9606.ENSP00000360762,9606.ENSP00000381282,9606.ENSP00000481570	XBP1,IRAK2,CEBPB,CXCL8,NFKBIB,ANKRD1,VIMP,TNFAIP3
GO:0009653	anatomical structure morphogenesis	34	1992	0.31	0.001	9606.ENSP00000216037,9606.ENSP00000230990,9606.ENSP00000239223,9606.ENSP00000242480,9606.ENSP00000244869,9606.ENSP00000259874,9606.ENSP00000273153,9606.ENSP00000305422,9606.ENSP00000306512,9606.ENSP00000307235,9606.ENSP00000322457,9606.ENSP00000326737,9606.ENSP00000332454,9606.ENSP00000333982,9606.ENSP00000338290,9606.ENSP00000344741,9606.ENSP00000346508,9606.ENSP00000349041,9606.ENSP00000356438,…	XBP1,HBEGF,DUSP1,EGR2,EREG,IER3,CSRNP1,CEBPB,CXCL8,EIF2AK3,SIAH2,TNFRSF12A,RIPK4,NDEL1,GZF1,INSIG1,PDGFA,NRARP,PTGS2,CTGF,TUFT1,DUSP5,JUN,PARD6B,ANKRD1,IRS2,ERRFI1,EDN1,HERC1,JMJD6,CYR61,TIPARP,CRYAB,NR4A3
GO:0036490	regulation of translation in response to endoplasmic reticulum stress	3	6	1.78	0.001	9606.ENSP00000253063,9606.ENSP00000307235,9606.ENSP00000473631	SESN2,EIF2AK3,DNAJC3
GO:0006464	cellular protein modification process	45	2999	0.26	0.0011	9606.ENSP00000200453,9606.ENSP00000222803,9606.ENSP00000228437,9606.ENSP00000230990,9606.ENSP00000239223,9606.ENSP00000242480,9606.ENSP00000244869,9606.ENSP00000255304,9606.ENSP00000256458,9606.ENSP00000258654,9606.ENSP00000261845,9606.ENSP00000263062,9606.ENSP00000264431,9606.ENSP00000268042,9606.ENSP00000270162,9606.ENSP00000282369,9606.ENSP00000303706,9606.ENSP00000307235,9606.ENSP00000312021,…	PPP1R15A,FKBP14,PRDM4,HBEGF,DUSP1,EGR2,EREG,USPL1,IRAK2,COG3,MAPK6,EPC1,RAPGEF2,ARRDC4,SIK1,TRIM36,CDC25A,EIF2AK3,FUT1,SIAH2,RIPK4,PDGFA,FUT4,PIM3,DUSP10,DUSP5,LONRF3,IRS2,PIGA,PDP1,VIMP,HERC1,JMJD6,CYR61,DCUN1D2,SELK,TIPARP,PGM3,CRYAB,USP36,FICD,DNAJC3,NEURL3,TNFAIP3,MAP3K14
GO:0043412	macromolecule modification	47	3197	0.25	0.0011	9606.ENSP00000200453,9606.ENSP00000222803,9606.ENSP00000228437,9606.ENSP00000230990,9606.ENSP00000239223,9606.ENSP00000242480,9606.ENSP00000244869,9606.ENSP00000255304,9606.ENSP00000256458,9606.ENSP00000258654,9606.ENSP00000261845,9606.ENSP00000263062,9606.ENSP00000264431,9606.ENSP00000268042,9606.ENSP00000270162,9606.ENSP00000282369,9606.ENSP00000303706,9606.ENSP00000307235,9606.ENSP00000312021,…	PPP1R15A,FKBP14,PRDM4,HBEGF,DUSP1,EGR2,EREG,USPL1,IRAK2,COG3,MAPK6,EPC1,RAPGEF2,ARRDC4,SIK1,TRIM36,CDC25A,EIF2AK3,FUT1,SIAH2,RIPK4,PDGFA,FUT4,PIM3,DUSP10,DUSP5,LONRF3,YRDC,IRS2,PIGA,PDP1,VIMP,HERC1,JMJD6,CYR61,DCUN1D2,SELK,TIPARP,THUMPD2,PGM3,CRYAB,USP36,FICD,DNAJC3,NEURL3,TNFAIP3,MAP3K14
GO:0097190	apoptotic signaling pathway	11	295	0.65	0.0011	9606.ENSP00000200453,9606.ENSP00000216037,9606.ENSP00000234420,9606.ENSP00000263339,9606.ENSP00000305422,9606.ENSP00000307305,9606.ENSP00000326737,9606.ENSP00000358022,9606.ENSP00000360266,9606.ENSP00000418813,9606.ENSP00000448665	PPP1R15A,XBP1,MSH6,IL1A,CEBPB,DDIT4,TNFRSF12A,MCL1,JUN,SELK,DDIT3
GO:0010558	negative regulation of macromolecule biosynthetic process	27	1425	0.36	0.0012	9606.ENSP00000216037,9606.ENSP00000230990,9606.ENSP00000239223,9606.ENSP00000244869,9606.ENSP00000252818,9606.ENSP00000253063,9606.ENSP00000256495,9606.ENSP00000263062,9606.ENSP00000264444,9606.ENSP00000297689,9606.ENSP00000305422,9606.ENSP00000307235,9606.ENSP00000322457,9606.ENSP00000338290,9606.ENSP00000342924,9606.ENSP00000344352,9606.ENSP00000347755,9606.ENSP00000349041,9606.ENSP00000360266,…	XBP1,HBEGF,DUSP1,EREG,JUND,SESN2,BHLHE40,EPC1,MXD1,NFIL3,CEBPB,EIF2AK3,SIAH2,GZF1,MCPH1,ATF3,ZNF140,NRARP,JUN,ANKRD1,TSPYL2,ERRFI1,EDN1,VIMP,NFXL1,DDIT3,NR4A3
GO:0040012	regulation of locomotion	20	881	0.44	0.0012	9606.ENSP00000216037,9606.ENSP00000230990,9606.ENSP00000244869,9606.ENSP00000263339,9606.ENSP00000264431,9606.ENSP00000265138,9606.ENSP00000296026,9606.ENSP00000306512,9606.ENSP00000346508,9606.ENSP00000355396,9606.ENSP00000355866,9606.ENSP00000356438,9606.ENSP00000360266,9606.ENSP00000360672,9606.ENSP00000365016,9606.ENSP00000368683,9606.ENSP00000398736,9606.ENSP00000418813,9606.ENSP00000427279,…	XBP1,HBEGF,EREG,IL1A,RAPGEF2,ARRDC3,CXCL3,CXCL8,PDGFA,LRIG2,DUSP10,PTGS2,JUN,PARD6B,IRS2,EDN1,CYR61,SELK,CXCL2,NR4A3
GO:2000145	regulation of cell motility	19	807	0.45	0.0012	9606.ENSP00000216037,9606.ENSP00000230990,9606.ENSP00000244869,9606.ENSP00000263339,9606.ENSP00000264431,9606.ENSP00000296026,9606.ENSP00000306512,9606.ENSP00000346508,9606.ENSP00000355396,9606.ENSP00000355866,9606.ENSP00000356438,9606.ENSP00000360266,9606.ENSP00000360672,9606.ENSP00000365016,9606.ENSP00000368683,9606.ENSP00000398736,9606.ENSP00000418813,9606.ENSP00000427279,9606.ENSP00000482027	XBP1,HBEGF,EREG,IL1A,RAPGEF2,CXCL3,CXCL8,PDGFA,LRIG2,DUSP10,PTGS2,JUN,PARD6B,IRS2,EDN1,CYR61,SELK,CXCL2,NR4A3
GO:0032675	regulation of interleukin-6 production	7	112	0.88	0.0013	9606.ENSP00000216037,9606.ENSP00000244869,9606.ENSP00000263339,9606.ENSP00000305422,9606.ENSP00000381282,9606.ENSP00000418813,9606.ENSP00000481570	XBP1,EREG,IL1A,CEBPB,VIMP,SELK,TNFAIP3
GO:0034097	response to cytokine	22	1035	0.41	0.0013	9606.ENSP00000216037,9606.ENSP00000227752,9606.ENSP00000244869,9606.ENSP00000252818,9606.ENSP00000256458,9606.ENSP00000263339,9606.ENSP00000296026,9606.ENSP00000297689,9606.ENSP00000305422,9606.ENSP00000306512,9606.ENSP00000310170,9606.ENSP00000326737,9606.ENSP00000331748,9606.ENSP00000356438,9606.ENSP00000358022,9606.ENSP00000360266,9606.ENSP00000360762,9606.ENSP00000365016,9606.ENSP00000368683,…	XBP1,IL10RA,EREG,JUND,IRAK2,IL1A,CXCL3,NFIL3,CEBPB,CXCL8,FOSL1,TNFRSF12A,RAB12,PTGS2,MCL1,JUN,ANKRD1,IRS2,EDN1,PIGA,CXCL2,MAP3K14
GO:1901362	organic cyclic compound biosynthetic process	47	3230	0.24	0.0013	9606.ENSP00000196489,9606.ENSP00000211936,9606.ENSP00000216037,9606.ENSP00000228437,9606.ENSP00000242480,9606.ENSP00000244869,9606.ENSP00000252818,9606.ENSP00000256495,9606.ENSP00000263062,9606.ENSP00000264444,9606.ENSP00000273153,9606.ENSP00000277746,9606.ENSP00000297689,9606.ENSP00000303696,9606.ENSP00000305422,9606.ENSP00000306328,9606.ENSP00000310170,9606.ENSP00000312988,9606.ENSP00000322545,…	ZNF416,ZNF184,XBP1,PRDM4,EGR2,EREG,JUND,BHLHE40,EPC1,MXD1,CSRNP1,NRBF2,NFIL3,ZNF57,CEBPB,SLC25A33,FOSL1,NFKBIB,ZNF543,ZNF555,GZF1,ZBTB49,ZNF823,ATF3,INSIG1,MAFF,ZNF140,CREB5,ZSCAN12,PTGS2,UAP1,CTGF,JUN,ZBTB43,TSPYL2,ZNF165,XDH,ZMYM5,ZNF527,JMJD6,NABP1,KLF6,NFXL1,PGM3,DDIT3,ZNF699,NR4A3
GO:0030334	regulation of cell migration	18	753	0.46	0.0014	9606.ENSP00000216037,9606.ENSP00000230990,9606.ENSP00000263339,9606.ENSP00000264431,9606.ENSP00000296026,9606.ENSP00000306512,9606.ENSP00000346508,9606.ENSP00000355396,9606.ENSP00000355866,9606.ENSP00000356438,9606.ENSP00000360266,9606.ENSP00000360672,9606.ENSP00000365016,9606.ENSP00000368683,9606.ENSP00000398736,9606.ENSP00000418813,9606.ENSP00000427279,9606.ENSP00000482027	XBP1,HBEGF,IL1A,RAPGEF2,CXCL3,CXCL8,PDGFA,LRIG2,DUSP10,PTGS2,JUN,PARD6B,IRS2,EDN1,CYR61,SELK,CXCL2,NR4A3
GO:0032268	regulation of cellular protein metabolic process	39	2486	0.27	0.0014	9606.ENSP00000200453,9606.ENSP00000216037,9606.ENSP00000230990,9606.ENSP00000239223,9606.ENSP00000244869,9606.ENSP00000253063,9606.ENSP00000256458,9606.ENSP00000264431,9606.ENSP00000264711,9606.ENSP00000265138,9606.ENSP00000268042,9606.ENSP00000303706,9606.ENSP00000307235,9606.ENSP00000307305,9606.ENSP00000322457,9606.ENSP00000342344,9606.ENSP00000344352,9606.ENSP00000346508,9606.ENSP00000348455,…	PPP1R15A,XBP1,HBEGF,DUSP1,EREG,SESN2,IRAK2,RAPGEF2,DNAJC27,ARRDC3,ARRDC4,CDC25A,EIF2AK3,DDIT4,SIAH2,CCNYL1,ATF3,PDGFA,UVRAG,RASSF1,LRIG2,DUSP10,PTGS2,CTGF,DUSP5,GADD45A,JUN,LONRF3,TSPYL2,ERRFI1,EDN1,XDH,CYR61,HERPUD1,DCUN1D2,CRYAB,DNAJC3,TNFAIP3,MAP3K14
GO:0035239	tube morphogenesis	16	615	0.49	0.0014	9606.ENSP00000216037,9606.ENSP00000244869,9606.ENSP00000306512,9606.ENSP00000307235,9606.ENSP00000326737,9606.ENSP00000338290,9606.ENSP00000346508,9606.ENSP00000349041,9606.ENSP00000356438,9606.ENSP00000356954,9606.ENSP00000360266,9606.ENSP00000368683,9606.ENSP00000394085,9606.ENSP00000398736,9606.ENSP00000420612,9606.ENSP00000482027	XBP1,EREG,CXCL8,EIF2AK3,TNFRSF12A,GZF1,PDGFA,NRARP,PTGS2,CTGF,JUN,EDN1,JMJD6,CYR61,TIPARP,NR4A3
GO:1901701	cellular response to oxygen-containing compound	20	896	0.43	0.0014	9606.ENSP00000216037,9606.ENSP00000253063,9606.ENSP00000256458,9606.ENSP00000264431,9606.ENSP00000305422,9606.ENSP00000306328,9606.ENSP00000306512,9606.ENSP00000307305,9606.ENSP00000312988,9606.ENSP00000333982,9606.ENSP00000344741,9606.ENSP00000356438,9606.ENSP00000360266,9606.ENSP00000360762,9606.ENSP00000365016,9606.ENSP00000366702,9606.ENSP00000368683,9606.ENSP00000381282,9606.ENSP00000481570,…	XBP1,SESN2,IRAK2,RAPGEF2,CEBPB,SLC25A33,CXCL8,DDIT4,NFKBIB,NDEL1,INSIG1,PTGS2,JUN,ANKRD1,IRS2,ERRFI1,EDN1,VIMP,TNFAIP3,NR4A3
GO:0048731	system development	56	4144	0.21	0.0015	9606.ENSP00000216037,9606.ENSP00000230990,9606.ENSP00000234420,9606.ENSP00000242480,9606.ENSP00000244869,9606.ENSP00000249356,9606.ENSP00000261845,9606.ENSP00000263062,9606.ENSP00000264431,9606.ENSP00000265138,9606.ENSP00000270162,9606.ENSP00000272542,9606.ENSP00000273153,9606.ENSP00000280612,9606.ENSP00000305422,9606.ENSP00000306512,9606.ENSP00000307235,9606.ENSP00000307305,9606.ENSP00000310170,…	XBP1,HBEGF,MSH6,EGR2,EREG,DNAJB9,MAPK6,EPC1,RAPGEF2,ARRDC3,SIK1,SLC20A1,CSRNP1,SLC7A11,CEBPB,CXCL8,EIF2AK3,DDIT4,FOSL1,SIAH2,TNFRSF12A,NDEL1,GZF1,MCPH1,ATF3,INSIG1,MAFF,PDGFA,NRARP,LRIG2,DUSP10,PTGS2,CTGF,TUFT1,PTBP2,JUN,PARD6B,ANKRD1,SLC25A25,IRS2,ERRFI1,GPCPD1,EDN1,XDH,HERC1,JMJD6,CYR61,SYBU,KLF6,TIPARP,PGM3,MANF,CRYAB,DDIT3,TNFAIP3,NR4A3
GO:0071900	regulation of protein serine/threonine kinase activity	14	488	0.54	0.0015	9606.ENSP00000239223,9606.ENSP00000253063,9606.ENSP00000256458,9606.ENSP00000264431,9606.ENSP00000303706,9606.ENSP00000342344,9606.ENSP00000346508,9606.ENSP00000348455,9606.ENSP00000355866,9606.ENSP00000358596,9606.ENSP00000360025,9606.ENSP00000368683,9606.ENSP00000481570,9606.ENSP00000482657	DUSP1,SESN2,IRAK2,RAPGEF2,CDC25A,CCNYL1,PDGFA,UVRAG,DUSP10,DUSP5,GADD45A,EDN1,TNFAIP3,MAP3K14
GO:0097193	intrinsic apoptotic signaling pathway	8	158	0.78	0.0015	9606.ENSP00000200453,9606.ENSP00000216037,9606.ENSP00000234420,9606.ENSP00000305422,9606.ENSP00000307305,9606.ENSP00000358022,9606.ENSP00000418813,9606.ENSP00000448665	PPP1R15A,XBP1,MSH6,CEBPB,DDIT4,MCL1,SELK,DDIT3
GO:0048646	anatomical structure formation involved in morphogenesis	19	831	0.44	0.0016	9606.ENSP00000216037,9606.ENSP00000239223,9606.ENSP00000242480,9606.ENSP00000244869,9606.ENSP00000306512,9606.ENSP00000307235,9606.ENSP00000326737,9606.ENSP00000346508,9606.ENSP00000349041,9606.ENSP00000356438,9606.ENSP00000356954,9606.ENSP00000358596,9606.ENSP00000360266,9606.ENSP00000360762,9606.ENSP00000368683,9606.ENSP00000390158,9606.ENSP00000394085,9606.ENSP00000398736,9606.ENSP00000482027	XBP1,DUSP1,EGR2,EREG,CXCL8,EIF2AK3,TNFRSF12A,PDGFA,NRARP,PTGS2,CTGF,DUSP5,JUN,ANKRD1,EDN1,HERC1,JMJD6,CYR61,NR4A3
GO:0045936	negative regulation of phosphate metabolic process	15	562	0.51	0.0018	9606.ENSP00000200453,9606.ENSP00000216037,9606.ENSP00000239223,9606.ENSP00000307305,9606.ENSP00000344352,9606.ENSP00000346508,9606.ENSP00000355866,9606.ENSP00000358596,9606.ENSP00000360025,9606.ENSP00000360266,9606.ENSP00000365016,9606.ENSP00000366702,9606.ENSP00000368727,9606.ENSP00000473631,9606.ENSP00000481570	PPP1R15A,XBP1,DUSP1,DDIT4,ATF3,PDGFA,DUSP10,DUSP5,GADD45A,JUN,IRS2,ERRFI1,XDH,DNAJC3,TNFAIP3
GO:0051240	positive regulation of multicellular organismal process	28	1551	0.34	0.0018	9606.ENSP00000216037,9606.ENSP00000230990,9606.ENSP00000234420,9606.ENSP00000244869,9606.ENSP00000252818,9606.ENSP00000261845,9606.ENSP00000263339,9606.ENSP00000264431,9606.ENSP00000305422,9606.ENSP00000306512,9606.ENSP00000307235,9606.ENSP00000326737,9606.ENSP00000333982,9606.ENSP00000346508,9606.ENSP00000355866,9606.ENSP00000356438,9606.ENSP00000356696,9606.ENSP00000356954,9606.ENSP00000358301,…	XBP1,HBEGF,MSH6,EREG,JUND,MAPK6,IL1A,RAPGEF2,CEBPB,CXCL8,EIF2AK3,TNFRSF12A,NDEL1,PDGFA,DUSP10,PTGS2,SUCO,CTGF,ADRB1,JUN,ANKRD1,EDN1,HRH1,CYR61,SELK,DDIT3,TNFAIP3,NR4A3
GO:0051248	negative regulation of protein metabolic process	22	1075	0.39	0.002	9606.ENSP00000200453,9606.ENSP00000216037,9606.ENSP00000230990,9606.ENSP00000239223,9606.ENSP00000253063,9606.ENSP00000307235,9606.ENSP00000307305,9606.ENSP00000322457,9606.ENSP00000344352,9606.ENSP00000355396,9606.ENSP00000355866,9606.ENSP00000356438,9606.ENSP00000358596,9606.ENSP00000360025,9606.ENSP00000360266,9606.ENSP00000366702,9606.ENSP00000368683,9606.ENSP00000368727,9606.ENSP00000409555,…	PPP1R15A,XBP1,HBEGF,DUSP1,SESN2,EIF2AK3,DDIT4,SIAH2,ATF3,LRIG2,DUSP10,PTGS2,DUSP5,GADD45A,JUN,ERRFI1,EDN1,XDH,HERPUD1,CRYAB,DNAJC3,TNFAIP3
GO:0051716	cellular response to stimulus	75	6212	0.16	0.002	9606.ENSP00000200453,9606.ENSP00000216037,9606.ENSP00000222803,9606.ENSP00000227752,9606.ENSP00000228437,9606.ENSP00000230990,9606.ENSP00000234420,9606.ENSP00000239223,9606.ENSP00000242480,9606.ENSP00000244869,9606.ENSP00000249356,9606.ENSP00000252818,9606.ENSP00000253063,9606.ENSP00000256458,9606.ENSP00000261845,9606.ENSP00000263339,9606.ENSP00000264431,9606.ENSP00000270162,9606.ENSP00000272542,…	PPP1R15A,XBP1,FKBP14,IL10RA,PRDM4,HBEGF,MSH6,DUSP1,EGR2,EREG,DNAJB9,JUND,SESN2,IRAK2,MAPK6,IL1A,RAPGEF2,SIK1,SLC20A1,CSRNP1,NRBF2,CXCL3,NFIL3,CDC25A,CEBPB,SLC25A33,CXCL8,EIF2AK3,DDIT4,FOSL1,NFKBIB,SIAH2,TNFRSF12A,RAB12,NDEL1,ATF3,INSIG1,PDGFA,UVRAG,NRARP,RASSF1,PTGS2,RGS16,CTGF,MCL1,ADRB1,DUSP5,GADD45A,JUN,ANKRD1,GPR3,TSPYL2,RND3,IRS2,ERRFI1,EDN1,PIGA,SEC31A,HRH1,VIMP,JMJD6,NABP1,HERPUD1,SELK,TIP…
GO:0061041	regulation of wound healing	7	124	0.83	0.0021	9606.ENSP00000216037,9606.ENSP00000230990,9606.ENSP00000326737,9606.ENSP00000346508,9606.ENSP00000355866,9606.ENSP00000368683,9606.ENSP00000481570	XBP1,HBEGF,TNFRSF12A,PDGFA,DUSP10,EDN1,TNFAIP3
GO:0043066	negative regulation of apoptotic process	19	859	0.42	0.0022	9606.ENSP00000216037,9606.ENSP00000239223,9606.ENSP00000259874,9606.ENSP00000263339,9606.ENSP00000305422,9606.ENSP00000322457,9606.ENSP00000353824,9606.ENSP00000356438,9606.ENSP00000358022,9606.ENSP00000360266,9606.ENSP00000365016,9606.ENSP00000368683,9606.ENSP00000381282,9606.ENSP00000398736,9606.ENSP00000409555,9606.ENSP00000433560,9606.ENSP00000473631,9606.ENSP00000481570,9606.ENSP00000482027	XBP1,DUSP1,IER3,IL1A,CEBPB,SIAH2,PIM3,PTGS2,MCL1,JUN,IRS2,EDN1,VIMP,CYR61,HERPUD1,CRYAB,DNAJC3,TNFAIP3,NR4A3
GO:0043408	regulation of MAPK cascade	17	712	0.46	0.0022	9606.ENSP00000216037,9606.ENSP00000239223,9606.ENSP00000256458,9606.ENSP00000264431,9606.ENSP00000264711,9606.ENSP00000344352,9606.ENSP00000346508,9606.ENSP00000355866,9606.ENSP00000356954,9606.ENSP00000358596,9606.ENSP00000360025,9606.ENSP00000360266,9606.ENSP00000366702,9606.ENSP00000368683,9606.ENSP00000368727,9606.ENSP00000398736,9606.ENSP00000482657	XBP1,DUSP1,IRAK2,RAPGEF2,DNAJC27,ATF3,PDGFA,DUSP10,CTGF,DUSP5,GADD45A,JUN,ERRFI1,EDN1,XDH,CYR61,MAP3K14
GO:0044267	cellular protein metabolic process	50	3603	0.22	0.0022	9606.ENSP00000200453,9606.ENSP00000216037,9606.ENSP00000222803,9606.ENSP00000228437,9606.ENSP00000230990,9606.ENSP00000239223,9606.ENSP00000242480,9606.ENSP00000244869,9606.ENSP00000249356,9606.ENSP00000255304,9606.ENSP00000256458,9606.ENSP00000258654,9606.ENSP00000261845,9606.ENSP00000263062,9606.ENSP00000264431,9606.ENSP00000268042,9606.ENSP00000270162,9606.ENSP00000282369,9606.ENSP00000303706,…	PPP1R15A,XBP1,FKBP14,PRDM4,HBEGF,DUSP1,EGR2,EREG,DNAJB9,USPL1,IRAK2,COG3,MAPK6,EPC1,RAPGEF2,ARRDC4,SIK1,TRIM36,CDC25A,EIF2AK3,FUT1,SIAH2,RAB12,RIPK4,PDGFA,FUT4,PIM3,DUSP10,DUSP5,LONRF3,IRS2,PIGA,PDP1,VIMP,HERC1,JMJD6,CYR61,HERPUD1,DCUN1D2,SELK,TIPARP,PGM3,CRYAB,USP36,FICD,DDIT3,DNAJC3,NEURL3,TNFAIP3,MAP3K14
GO:0048513	animal organ development	43	2926	0.25	0.0022	9606.ENSP00000216037,9606.ENSP00000230990,9606.ENSP00000242480,9606.ENSP00000244869,9606.ENSP00000249356,9606.ENSP00000264431,9606.ENSP00000265138,9606.ENSP00000270162,9606.ENSP00000272542,9606.ENSP00000273153,9606.ENSP00000280612,9606.ENSP00000305422,9606.ENSP00000306512,9606.ENSP00000307235,9606.ENSP00000307305,9606.ENSP00000310170,9606.ENSP00000333982,9606.ENSP00000338290,9606.ENSP00000342924,…	XBP1,HBEGF,EGR2,EREG,DNAJB9,RAPGEF2,ARRDC3,SIK1,SLC20A1,CSRNP1,SLC7A11,CEBPB,CXCL8,EIF2AK3,DDIT4,FOSL1,NDEL1,GZF1,MCPH1,ATF3,INSIG1,MAFF,PDGFA,PTGS2,CTGF,TUFT1,PTBP2,JUN,ANKRD1,SLC25A25,IRS2,ERRFI1,GPCPD1,EDN1,XDH,HERC1,JMJD6,CYR61,KLF6,TIPARP,PGM3,CRYAB,NR4A3
GO:1900101	regulation of endoplasmic reticulum unfolded protein response	4	27	1.25	0.0022	9606.ENSP00000200453,9606.ENSP00000216037,9606.ENSP00000249356,9606.ENSP00000446479	PPP1R15A,XBP1,DNAJB9,FICD
GO:0007165	signal transduction	61	4738	0.19	0.0023	9606.ENSP00000200453,9606.ENSP00000216037,9606.ENSP00000222803,9606.ENSP00000227752,9606.ENSP00000228437,9606.ENSP00000230990,9606.ENSP00000234420,9606.ENSP00000239223,9606.ENSP00000244869,9606.ENSP00000249356,9606.ENSP00000253063,9606.ENSP00000256458,9606.ENSP00000261845,9606.ENSP00000263339,9606.ENSP00000264431,9606.ENSP00000270162,9606.ENSP00000272542,9606.ENSP00000273153,9606.ENSP00000296026,…	PPP1R15A,XBP1,FKBP14,IL10RA,PRDM4,HBEGF,MSH6,DUSP1,EREG,DNAJB9,SESN2,IRAK2,MAPK6,IL1A,RAPGEF2,SIK1,SLC20A1,CSRNP1,CXCL3,CEBPB,SLC25A33,CXCL8,EIF2AK3,DDIT4,NFKBIB,SIAH2,TNFRSF12A,NDEL1,ATF3,INSIG1,PDGFA,NRARP,RASSF1,PTGS2,RGS16,CTGF,MCL1,ADRB1,DUSP5,GADD45A,JUN,GPR3,TSPYL2,RND3,IRS2,EDN1,SEC31A,HRH1,VIMP,JMJD6,HERPUD1,SELK,TIPARP,CXCL2,CRYAB,DDIT3,DTNA,DNAJC3,TNFAIP3,NR4A3,MAP3K14
GO:0032269	negative regulation of cellular protein metabolic process	21	1014	0.4	0.0023	9606.ENSP00000200453,9606.ENSP00000216037,9606.ENSP00000239223,9606.ENSP00000253063,9606.ENSP00000307235,9606.ENSP00000307305,9606.ENSP00000322457,9606.ENSP00000344352,9606.ENSP00000355396,9606.ENSP00000355866,9606.ENSP00000356438,9606.ENSP00000358596,9606.ENSP00000360025,9606.ENSP00000360266,9606.ENSP00000366702,9606.ENSP00000368683,9606.ENSP00000368727,9606.ENSP00000409555,9606.ENSP00000433560,…	PPP1R15A,XBP1,DUSP1,SESN2,EIF2AK3,DDIT4,SIAH2,ATF3,LRIG2,DUSP10,PTGS2,DUSP5,GADD45A,JUN,ERRFI1,EDN1,XDH,HERPUD1,CRYAB,DNAJC3,TNFAIP3
GO:2001233	regulation of apoptotic signaling pathway	12	388	0.57	0.0023	9606.ENSP00000216037,9606.ENSP00000263339,9606.ENSP00000307235,9606.ENSP00000322457,9606.ENSP00000326737,9606.ENSP00000344352,9606.ENSP00000356438,9606.ENSP00000358022,9606.ENSP00000381282,9606.ENSP00000409555,9606.ENSP00000448665,9606.ENSP00000481570	XBP1,IL1A,EIF2AK3,SIAH2,TNFRSF12A,ATF3,PTGS2,MCL1,VIMP,HERPUD1,DDIT3,TNFAIP3
GO:0045786	negative regulation of cell cycle	14	517	0.51	0.0024	9606.ENSP00000200453,9606.ENSP00000239223,9606.ENSP00000263062,9606.ENSP00000286760,9606.ENSP00000306512,9606.ENSP00000338807,9606.ENSP00000342924,9606.ENSP00000349547,9606.ENSP00000356438,9606.ENSP00000360025,9606.ENSP00000364591,9606.ENSP00000403683,9606.ENSP00000448665,9606.ENSP00000481570	PPP1R15A,DUSP1,EPC1,WHAMM,CXCL8,ZBTB49,MCPH1,RASSF1,PTGS2,GADD45A,TSPYL2,NABP1,DDIT3,TNFAIP3
GO:0062012	regulation of small molecule metabolic process	11	332	0.6	0.0024	9606.ENSP00000253063,9606.ENSP00000270162,9606.ENSP00000306328,9606.ENSP00000307305,9606.ENSP00000344741,9606.ENSP00000356438,9606.ENSP00000365016,9606.ENSP00000379503,9606.ENSP00000380247,9606.ENSP00000381282,9606.ENSP00000482027	SESN2,SIK1,SLC25A33,DDIT4,INSIG1,PTGS2,IRS2,PDP1,HRH1,VIMP,NR4A3
GO:0031328	positive regulation of cellular biosynthetic process	31	1846	0.3	0.0025	9606.ENSP00000200453,9606.ENSP00000216037,9606.ENSP00000228437,9606.ENSP00000242480,9606.ENSP00000244869,9606.ENSP00000252818,9606.ENSP00000253063,9606.ENSP00000263062,9606.ENSP00000263339,9606.ENSP00000273153,9606.ENSP00000305422,9606.ENSP00000307235,9606.ENSP00000310170,9606.ENSP00000312988,9606.ENSP00000338624,9606.ENSP00000338807,9606.ENSP00000344352,9606.ENSP00000344741,9606.ENSP00000345393,…	PPP1R15A,XBP1,PRDM4,EGR2,EREG,JUND,SESN2,EPC1,IL1A,CSRNP1,CEBPB,EIF2AK3,FOSL1,NFKBIB,TASP1,ZBTB49,ATF3,INSIG1,MAFF,CREB5,PTGS2,JUN,ANKRD1,IRS2,EDN1,HRH1,CYR61,KLF6,DDIT3,DNAJC3,NR4A3
GO:0051247	positive regulation of protein metabolic process	28	1587	0.33	0.0025	9606.ENSP00000200453,9606.ENSP00000216037,9606.ENSP00000230990,9606.ENSP00000244869,9606.ENSP00000256458,9606.ENSP00000263339,9606.ENSP00000264431,9606.ENSP00000264711,9606.ENSP00000265138,9606.ENSP00000268042,9606.ENSP00000307235,9606.ENSP00000346508,9606.ENSP00000349547,9606.ENSP00000356438,9606.ENSP00000356954,9606.ENSP00000358596,9606.ENSP00000360025,9606.ENSP00000360266,9606.ENSP00000360690,…	PPP1R15A,XBP1,HBEGF,EREG,IRAK2,IL1A,RAPGEF2,DNAJC27,ARRDC3,ARRDC4,EIF2AK3,PDGFA,RASSF1,PTGS2,CTGF,DUSP5,GADD45A,JUN,LONRF3,EDN1,XDH,CYR61,HERPUD1,DCUN1D2,TIPARP,DNAJC3,TNFAIP3,MAP3K14
GO:0042326	negative regulation of phosphorylation	13	458	0.53	0.0026	9606.ENSP00000216037,9606.ENSP00000239223,9606.ENSP00000307305,9606.ENSP00000344352,9606.ENSP00000355866,9606.ENSP00000358596,9606.ENSP00000360025,9606.ENSP00000360266,9606.ENSP00000365016,9606.ENSP00000366702,9606.ENSP00000368727,9606.ENSP00000473631,9606.ENSP00000481570	XBP1,DUSP1,DDIT4,ATF3,DUSP10,DUSP5,GADD45A,JUN,IRS2,ERRFI1,XDH,DNAJC3,TNFAIP3
GO:0043558	regulation of translational initiation in response to stress	3	10	1.56	0.0026	9606.ENSP00000200453,9606.ENSP00000307235,9606.ENSP00000473631	PPP1R15A,EIF2AK3,DNAJC3
GO:0060548	negative regulation of cell death	20	953	0.4	0.0027	9606.ENSP00000216037,9606.ENSP00000239223,9606.ENSP00000259874,9606.ENSP00000263339,9606.ENSP00000305422,9606.ENSP00000322457,9606.ENSP00000353824,9606.ENSP00000356438,9606.ENSP00000356954,9606.ENSP00000358022,9606.ENSP00000360266,9606.ENSP00000365016,9606.ENSP00000368683,9606.ENSP00000381282,9606.ENSP00000398736,9606.ENSP00000409555,9606.ENSP00000433560,9606.ENSP00000473631,9606.ENSP00000481570,…	XBP1,DUSP1,IER3,IL1A,CEBPB,SIAH2,PIM3,PTGS2,CTGF,MCL1,JUN,IRS2,EDN1,VIMP,CYR61,HERPUD1,CRYAB,DNAJC3,TNFAIP3,NR4A3
GO:2000113	negative regulation of cellular macromolecule biosynthetic process	25	1348	0.35	0.0027	9606.ENSP00000216037,9606.ENSP00000230990,9606.ENSP00000239223,9606.ENSP00000244869,9606.ENSP00000252818,9606.ENSP00000253063,9606.ENSP00000256495,9606.ENSP00000263062,9606.ENSP00000264444,9606.ENSP00000297689,9606.ENSP00000305422,9606.ENSP00000307235,9606.ENSP00000338290,9606.ENSP00000342924,9606.ENSP00000344352,9606.ENSP00000347755,9606.ENSP00000349041,9606.ENSP00000360266,9606.ENSP00000360762,…	XBP1,HBEGF,DUSP1,EREG,JUND,SESN2,BHLHE40,EPC1,MXD1,NFIL3,CEBPB,EIF2AK3,GZF1,MCPH1,ATF3,ZNF140,NRARP,JUN,ANKRD1,TSPYL2,EDN1,VIMP,NFXL1,DDIT3,NR4A3
GO:0009719	response to endogenous stimulus	25	1353	0.35	0.0028	9606.ENSP00000216037,9606.ENSP00000239223,9606.ENSP00000242480,9606.ENSP00000244869,9606.ENSP00000252818,9606.ENSP00000253063,9606.ENSP00000264431,9606.ENSP00000270162,9606.ENSP00000305422,9606.ENSP00000306328,9606.ENSP00000306512,9606.ENSP00000307305,9606.ENSP00000310170,9606.ENSP00000333982,9606.ENSP00000356438,9606.ENSP00000356954,9606.ENSP00000360266,9606.ENSP00000360762,9606.ENSP00000365016,…	XBP1,DUSP1,EGR2,EREG,JUND,SESN2,RAPGEF2,SIK1,CEBPB,SLC25A33,CXCL8,DDIT4,FOSL1,NDEL1,PTGS2,CTGF,JUN,ANKRD1,IRS2,ERRFI1,EDN1,HRH1,VIMP,CRYAB,NR4A3
GO:0000122	negative regulation of transcription by RNA polymerase II	18	809	0.43	0.0029	9606.ENSP00000216037,9606.ENSP00000252818,9606.ENSP00000256495,9606.ENSP00000263062,9606.ENSP00000264444,9606.ENSP00000297689,9606.ENSP00000305422,9606.ENSP00000338290,9606.ENSP00000342924,9606.ENSP00000344352,9606.ENSP00000347755,9606.ENSP00000349041,9606.ENSP00000360266,9606.ENSP00000360762,9606.ENSP00000368683,9606.ENSP00000422037,9606.ENSP00000448665,9606.ENSP00000482027	XBP1,JUND,BHLHE40,EPC1,MXD1,NFIL3,CEBPB,GZF1,MCPH1,ATF3,ZNF140,NRARP,JUN,ANKRD1,EDN1,NFXL1,DDIT3,NR4A3
GO:0001558	regulation of cell growth	12	402	0.55	0.0029	9606.ENSP00000216037,9606.ENSP00000230990,9606.ENSP00000253063,9606.ENSP00000306328,9606.ENSP00000326737,9606.ENSP00000333982,9606.ENSP00000356954,9606.ENSP00000364591,9606.ENSP00000368683,9606.ENSP00000398736,9606.ENSP00000427108,9606.ENSP00000433560	XBP1,HBEGF,SESN2,SLC25A33,TNFRSF12A,NDEL1,CTGF,TSPYL2,EDN1,CYR61,CDKN2AIP,CRYAB
GO:0090023	positive regulation of neutrophil chemotaxis	4	30	1.2	0.0029	9606.ENSP00000296026,9606.ENSP00000306512,9606.ENSP00000368683,9606.ENSP00000427279	CXCL3,CXCL8,EDN1,CXCL2
GO:1902533	positive regulation of intracellular signal transduction	20	959	0.4	0.0029	9606.ENSP00000216037,9606.ENSP00000230990,9606.ENSP00000244869,9606.ENSP00000256458,9606.ENSP00000264431,9606.ENSP00000264711,9606.ENSP00000321026,9606.ENSP00000346508,9606.ENSP00000356954,9606.ENSP00000358022,9606.ENSP00000358301,9606.ENSP00000358596,9606.ENSP00000360025,9606.ENSP00000360266,9606.ENSP00000360762,9606.ENSP00000365016,9606.ENSP00000368683,9606.ENSP00000368727,9606.ENSP00000448665,…	XBP1,HBEGF,EREG,IRAK2,RAPGEF2,DNAJC27,LURAP1L,PDGFA,CTGF,MCL1,ADRB1,DUSP5,GADD45A,JUN,ANKRD1,IRS2,EDN1,XDH,DDIT3,MAP3K14
GO:0006983	ER overload response	3	11	1.52	0.0031	9606.ENSP00000307235,9606.ENSP00000381282,9606.ENSP00000448665	EIF2AK3,VIMP,DDIT3
GO:0008283	cell population proliferation	16	676	0.45	0.0033	9606.ENSP00000216037,9606.ENSP00000228437,9606.ENSP00000244869,9606.ENSP00000255304,9606.ENSP00000263339,9606.ENSP00000264444,9606.ENSP00000303706,9606.ENSP00000305422,9606.ENSP00000307305,9606.ENSP00000333982,9606.ENSP00000344741,9606.ENSP00000349041,9606.ENSP00000356954,9606.ENSP00000365016,9606.ENSP00000398736,9606.ENSP00000482027	XBP1,PRDM4,EREG,USPL1,IL1A,MXD1,CDC25A,CEBPB,DDIT4,NDEL1,INSIG1,NRARP,CTGF,IRS2,CYR61,NR4A3
GO:0009607	response to biotic stimulus	23	1206	0.36	0.0033	9606.ENSP00000216037,9606.ENSP00000227752,9606.ENSP00000252818,9606.ENSP00000256458,9606.ENSP00000296026,9606.ENSP00000305422,9606.ENSP00000306512,9606.ENSP00000307235,9606.ENSP00000307305,9606.ENSP00000310170,9606.ENSP00000312988,9606.ENSP00000331748,9606.ENSP00000355866,9606.ENSP00000356438,9606.ENSP00000360266,9606.ENSP00000360762,9606.ENSP00000368683,9606.ENSP00000381282,9606.ENSP00000427279,…	XBP1,IL10RA,JUND,IRAK2,CXCL3,CEBPB,CXCL8,EIF2AK3,DDIT4,FOSL1,NFKBIB,RAB12,DUSP10,PTGS2,JUN,ANKRD1,EDN1,VIMP,CXCL2,DDIT3,DNAJC3,TNFAIP3,MAP3K14
GO:1904707	positive regulation of vascular smooth muscle cell proliferation	4	32	1.18	0.0035	9606.ENSP00000216037,9606.ENSP00000360266,9606.ENSP00000368683,9606.ENSP00000482027	XBP1,JUN,EDN1,NR4A3
GO:0034645	cellular macromolecule biosynthetic process	48	3518	0.21	0.0041	9606.ENSP00000196489,9606.ENSP00000211936,9606.ENSP00000216037,9606.ENSP00000228437,9606.ENSP00000242480,9606.ENSP00000244869,9606.ENSP00000252818,9606.ENSP00000256495,9606.ENSP00000258654,9606.ENSP00000263062,9606.ENSP00000264444,9606.ENSP00000273153,9606.ENSP00000277746,9606.ENSP00000297689,9606.ENSP00000303696,9606.ENSP00000305422,9606.ENSP00000306328,9606.ENSP00000310170,9606.ENSP00000312021,…	ZNF416,ZNF184,XBP1,PRDM4,EGR2,EREG,JUND,BHLHE40,COG3,EPC1,MXD1,CSRNP1,NRBF2,NFIL3,ZNF57,CEBPB,SLC25A33,FOSL1,FUT1,NFKBIB,ZNF543,ZNF555,GZF1,ZBTB49,ZNF823,ATF3,MAFF,ZNF140,CREB5,FUT4,ZSCAN12,CTGF,JUN,ZBTB43,TSPYL2,ZNF165,PIGA,ZMYM5,ZNF527,JMJD6,NABP1,SELK,KLF6,NFXL1,PGM3,DDIT3,ZNF699,NR4A3
GO:0001933	negative regulation of protein phosphorylation	12	422	0.53	0.0042	9606.ENSP00000216037,9606.ENSP00000239223,9606.ENSP00000307305,9606.ENSP00000344352,9606.ENSP00000355866,9606.ENSP00000358596,9606.ENSP00000360025,9606.ENSP00000360266,9606.ENSP00000366702,9606.ENSP00000368727,9606.ENSP00000473631,9606.ENSP00000481570	XBP1,DUSP1,DDIT4,ATF3,DUSP10,DUSP5,GADD45A,JUN,ERRFI1,XDH,DNAJC3,TNFAIP3
GO:0006915	apoptotic process	19	915	0.4	0.0042	9606.ENSP00000200453,9606.ENSP00000216037,9606.ENSP00000234420,9606.ENSP00000259874,9606.ENSP00000263339,9606.ENSP00000273153,9606.ENSP00000305422,9606.ENSP00000307305,9606.ENSP00000322457,9606.ENSP00000326737,9606.ENSP00000353824,9606.ENSP00000358022,9606.ENSP00000360025,9606.ENSP00000360266,9606.ENSP00000398736,9606.ENSP00000418813,9606.ENSP00000433560,9606.ENSP00000448665,9606.ENSP00000481570	PPP1R15A,XBP1,MSH6,IER3,IL1A,CSRNP1,CEBPB,DDIT4,SIAH2,TNFRSF12A,PIM3,MCL1,GADD45A,JUN,CYR61,SELK,CRYAB,DDIT3,TNFAIP3
GO:0048008	platelet-derived growth factor receptor signaling pathway	4	34	1.15	0.0042	9606.ENSP00000273153,9606.ENSP00000346508,9606.ENSP00000420612,9606.ENSP00000482027	CSRNP1,PDGFA,TIPARP,NR4A3
GO:0071396	cellular response to lipid	13	486	0.51	0.0042	9606.ENSP00000216037,9606.ENSP00000256458,9606.ENSP00000305422,9606.ENSP00000306512,9606.ENSP00000307305,9606.ENSP00000312988,9606.ENSP00000344741,9606.ENSP00000360762,9606.ENSP00000366702,9606.ENSP00000368683,9606.ENSP00000381282,9606.ENSP00000481570,9606.ENSP00000482027	XBP1,IRAK2,CEBPB,CXCL8,DDIT4,NFKBIB,INSIG1,ANKRD1,ERRFI1,EDN1,VIMP,TNFAIP3,NR4A3
GO:0071417	cellular response to organonitrogen compound	13	485	0.51	0.0042	9606.ENSP00000216037,9606.ENSP00000253063,9606.ENSP00000264431,9606.ENSP00000305422,9606.ENSP00000306328,9606.ENSP00000333982,9606.ENSP00000356438,9606.ENSP00000365016,9606.ENSP00000366702,9606.ENSP00000368683,9606.ENSP00000380247,9606.ENSP00000381282,9606.ENSP00000482027	XBP1,SESN2,RAPGEF2,CEBPB,SLC25A33,NDEL1,PTGS2,IRS2,ERRFI1,EDN1,HRH1,VIMP,NR4A3
GO:0070373	negative regulation of ERK1 and ERK2 cascade	5	65	0.97	0.0044	9606.ENSP00000216037,9606.ENSP00000239223,9606.ENSP00000344352,9606.ENSP00000355866,9606.ENSP00000366702	XBP1,DUSP1,ATF3,DUSP10,ERRFI1
GO:0009314	response to radiation	12	425	0.53	0.0045	9606.ENSP00000234420,9606.ENSP00000239223,9606.ENSP00000252818,9606.ENSP00000256495,9606.ENSP00000270162,9606.ENSP00000303706,9606.ENSP00000356438,9606.ENSP00000360025,9606.ENSP00000360266,9606.ENSP00000380247,9606.ENSP00000403683,9606.ENSP00000433560	MSH6,DUSP1,JUND,BHLHE40,SIK1,CDC25A,PTGS2,GADD45A,JUN,HRH1,NABP1,CRYAB
GO:1900102	negative regulation of endoplasmic reticulum unfolded protein response	3	13	1.44	0.0045	9606.ENSP00000200453,9606.ENSP00000216037,9606.ENSP00000249356	PPP1R15A,XBP1,DNAJB9
GO:0071496	cellular response to external stimulus	10	305	0.6	0.0046	9606.ENSP00000216037,9606.ENSP00000253063,9606.ENSP00000307235,9606.ENSP00000310170,9606.ENSP00000344352,9606.ENSP00000356438,9606.ENSP00000360025,9606.ENSP00000360266,9606.ENSP00000360762,9606.ENSP00000482657	XBP1,SESN2,EIF2AK3,FOSL1,ATF3,PTGS2,GADD45A,JUN,ANKRD1,MAP3K14
GO:0010557	positive regulation of macromolecule biosynthetic process	29	1758	0.3	0.0048	9606.ENSP00000200453,9606.ENSP00000216037,9606.ENSP00000228437,9606.ENSP00000242480,9606.ENSP00000244869,9606.ENSP00000252818,9606.ENSP00000253063,9606.ENSP00000263062,9606.ENSP00000263339,9606.ENSP00000273153,9606.ENSP00000305422,9606.ENSP00000307235,9606.ENSP00000310170,9606.ENSP00000312988,9606.ENSP00000338624,9606.ENSP00000338807,9606.ENSP00000344352,9606.ENSP00000344741,9606.ENSP00000345393,…	PPP1R15A,XBP1,PRDM4,EGR2,EREG,JUND,SESN2,EPC1,IL1A,CSRNP1,CEBPB,EIF2AK3,FOSL1,NFKBIB,TASP1,ZBTB49,ATF3,INSIG1,MAFF,CREB5,JUN,ANKRD1,IRS2,EDN1,CYR61,KLF6,DDIT3,DNAJC3,NR4A3
GO:0032270	positive regulation of cellular protein metabolic process	26	1496	0.32	0.0048	9606.ENSP00000200453,9606.ENSP00000216037,9606.ENSP00000230990,9606.ENSP00000244869,9606.ENSP00000256458,9606.ENSP00000264431,9606.ENSP00000264711,9606.ENSP00000265138,9606.ENSP00000268042,9606.ENSP00000307235,9606.ENSP00000346508,9606.ENSP00000349547,9606.ENSP00000356438,9606.ENSP00000356954,9606.ENSP00000358596,9606.ENSP00000360025,9606.ENSP00000360266,9606.ENSP00000360690,9606.ENSP00000368683,…	PPP1R15A,XBP1,HBEGF,EREG,IRAK2,RAPGEF2,DNAJC27,ARRDC3,ARRDC4,EIF2AK3,PDGFA,RASSF1,PTGS2,CTGF,DUSP5,GADD45A,JUN,LONRF3,EDN1,XDH,CYR61,HERPUD1,DCUN1D2,DNAJC3,TNFAIP3,MAP3K14
GO:0007169	transmembrane receptor protein tyrosine kinase signaling pathway	13	499	0.5	0.0052	9606.ENSP00000216037,9606.ENSP00000230990,9606.ENSP00000244869,9606.ENSP00000264431,9606.ENSP00000273153,9606.ENSP00000307235,9606.ENSP00000307305,9606.ENSP00000333982,9606.ENSP00000346508,9606.ENSP00000356954,9606.ENSP00000365016,9606.ENSP00000420612,9606.ENSP00000482027	XBP1,HBEGF,EREG,RAPGEF2,CSRNP1,EIF2AK3,DDIT4,NDEL1,PDGFA,CTGF,IRS2,TIPARP,NR4A3
GO:0071850	mitotic cell cycle arrest	3	14	1.41	0.0052	9606.ENSP00000239223,9606.ENSP00000342924,9606.ENSP00000360025	DUSP1,MCPH1,GADD45A
GO:0045934	negative regulation of nucleobase-containing compound metabolic process	25	1424	0.32	0.0053	9606.ENSP00000216037,9606.ENSP00000234420,9606.ENSP00000239223,9606.ENSP00000244869,9606.ENSP00000252818,9606.ENSP00000256495,9606.ENSP00000263062,9606.ENSP00000264444,9606.ENSP00000297689,9606.ENSP00000305422,9606.ENSP00000307305,9606.ENSP00000322457,9606.ENSP00000338290,9606.ENSP00000342924,9606.ENSP00000344352,9606.ENSP00000347755,9606.ENSP00000349041,9606.ENSP00000359216,9606.ENSP00000360266,…	XBP1,MSH6,DUSP1,EREG,JUND,BHLHE40,EPC1,MXD1,NFIL3,CEBPB,DDIT4,SIAH2,GZF1,MCPH1,ATF3,ZNF140,NRARP,PTBP2,JUN,ANKRD1,TSPYL2,EDN1,NFXL1,DDIT3,NR4A3
GO:0019216	regulation of lipid metabolic process	11	373	0.55	0.0054	9606.ENSP00000216037,9606.ENSP00000270162,9606.ENSP00000277746,9606.ENSP00000344741,9606.ENSP00000346508,9606.ENSP00000356438,9606.ENSP00000360762,9606.ENSP00000365016,9606.ENSP00000379503,9606.ENSP00000398736,9606.ENSP00000482027	XBP1,SIK1,NRBF2,INSIG1,PDGFA,PTGS2,ANKRD1,IRS2,PDP1,CYR61,NR4A3
GO:1905898	positive regulation of response to endoplasmic reticulum stress	4	37	1.11	0.0054	9606.ENSP00000200453,9606.ENSP00000216037,9606.ENSP00000409555,9606.ENSP00000448665	PPP1R15A,XBP1,HERPUD1,DDIT3
GO:0007049	cell cycle	23	1263	0.34	0.0056	9606.ENSP00000200453,9606.ENSP00000234420,9606.ENSP00000239223,9606.ENSP00000244869,9606.ENSP00000261845,9606.ENSP00000270162,9606.ENSP00000282369,9606.ENSP00000286760,9606.ENSP00000303706,9606.ENSP00000306512,9606.ENSP00000322457,9606.ENSP00000333982,9606.ENSP00000338807,9606.ENSP00000342924,9606.ENSP00000348455,9606.ENSP00000349547,9606.ENSP00000353824,9606.ENSP00000360025,9606.ENSP00000360672,…	PPP1R15A,MSH6,DUSP1,EREG,MAPK6,SIK1,TRIM36,WHAMM,CDC25A,CXCL8,SIAH2,NDEL1,ZBTB49,MCPH1,UVRAG,RASSF1,PIM3,GADD45A,PARD6B,TSPYL2,NABP1,DDIT3,MIS12
GO:0031960	response to corticosteroid	7	154	0.74	0.0057	9606.ENSP00000239223,9606.ENSP00000307305,9606.ENSP00000310170,9606.ENSP00000356438,9606.ENSP00000356954,9606.ENSP00000366702,9606.ENSP00000368683	DUSP1,DDIT4,FOSL1,PTGS2,CTGF,ERRFI1,EDN1
GO:1903524	positive regulation of blood circulation	5	70	0.93	0.0057	9606.ENSP00000356438,9606.ENSP00000356954,9606.ENSP00000358301,9606.ENSP00000368683,9606.ENSP00000380247	PTGS2,CTGF,ADRB1,EDN1,HRH1
GO:0035295	tube development	17	793	0.41	0.0058	9606.ENSP00000216037,9606.ENSP00000244869,9606.ENSP00000306512,9606.ENSP00000307235,9606.ENSP00000326737,9606.ENSP00000338290,9606.ENSP00000346508,9606.ENSP00000349041,9606.ENSP00000356438,9606.ENSP00000356954,9606.ENSP00000360266,9606.ENSP00000366702,9606.ENSP00000368683,9606.ENSP00000394085,9606.ENSP00000398736,9606.ENSP00000420612,9606.ENSP00000482027	XBP1,EREG,CXCL8,EIF2AK3,TNFRSF12A,GZF1,PDGFA,NRARP,PTGS2,CTGF,JUN,ERRFI1,EDN1,JMJD6,CYR61,TIPARP,NR4A3
GO:0071495	cellular response to endogenous stimulus	21	1106	0.36	0.0059	9606.ENSP00000216037,9606.ENSP00000239223,9606.ENSP00000252818,9606.ENSP00000253063,9606.ENSP00000264431,9606.ENSP00000270162,9606.ENSP00000305422,9606.ENSP00000306328,9606.ENSP00000306512,9606.ENSP00000307305,9606.ENSP00000333982,9606.ENSP00000356438,9606.ENSP00000356954,9606.ENSP00000360266,9606.ENSP00000360762,9606.ENSP00000365016,9606.ENSP00000366702,9606.ENSP00000368683,9606.ENSP00000380247,…	XBP1,DUSP1,JUND,SESN2,RAPGEF2,SIK1,CEBPB,SLC25A33,CXCL8,DDIT4,NDEL1,PTGS2,CTGF,JUN,ANKRD1,IRS2,ERRFI1,EDN1,HRH1,VIMP,NR4A3
GO:0071345	cellular response to cytokine stimulus	19	953	0.38	0.0063	9606.ENSP00000216037,9606.ENSP00000227752,9606.ENSP00000244869,9606.ENSP00000256458,9606.ENSP00000263339,9606.ENSP00000296026,9606.ENSP00000297689,9606.ENSP00000305422,9606.ENSP00000306512,9606.ENSP00000326737,9606.ENSP00000331748,9606.ENSP00000356438,9606.ENSP00000358022,9606.ENSP00000360762,9606.ENSP00000365016,9606.ENSP00000368683,9606.ENSP00000369820,9606.ENSP00000427279,9606.ENSP00000482657	XBP1,IL10RA,EREG,IRAK2,IL1A,CXCL3,NFIL3,CEBPB,CXCL8,TNFRSF12A,RAB12,PTGS2,MCL1,ANKRD1,IRS2,EDN1,PIGA,CXCL2,MAP3K14
GO:0042542	response to hydrogen peroxide	6	112	0.81	0.0064	9606.ENSP00000239223,9606.ENSP00000310170,9606.ENSP00000360266,9606.ENSP00000433560,9606.ENSP00000481570,9606.ENSP00000482027	DUSP1,FOSL1,JUN,CRYAB,TNFAIP3,NR4A3
GO:0043281	regulation of cysteine-type endopeptidase activity involved in apoptotic process	8	209	0.66	0.0065	9606.ENSP00000307235,9606.ENSP00000322457,9606.ENSP00000356438,9606.ENSP00000356954,9606.ENSP00000368727,9606.ENSP00000398736,9606.ENSP00000409555,9606.ENSP00000433560	EIF2AK3,SIAH2,PTGS2,CTGF,XDH,CYR61,HERPUD1,CRYAB
GO:0000165	MAPK cascade	10	323	0.57	0.0066	9606.ENSP00000230990,9606.ENSP00000244869,9606.ENSP00000256458,9606.ENSP00000261845,9606.ENSP00000264431,9606.ENSP00000346508,9606.ENSP00000358596,9606.ENSP00000365016,9606.ENSP00000433560,9606.ENSP00000482657	HBEGF,EREG,IRAK2,MAPK6,RAPGEF2,PDGFA,DUSP5,IRS2,CRYAB,MAP3K14
GO:0009612	response to mechanical stimulus	8	210	0.66	0.0066	9606.ENSP00000252818,9606.ENSP00000310170,9606.ENSP00000356438,9606.ENSP00000360025,9606.ENSP00000360266,9606.ENSP00000360762,9606.ENSP00000368683,9606.ENSP00000482657	JUND,FOSL1,PTGS2,GADD45A,JUN,ANKRD1,EDN1,MAP3K14
GO:0009987	cellular process	140	14652	0.06	0.0066	9606.ENSP00000075120,9606.ENSP00000196489,9606.ENSP00000200453,9606.ENSP00000211936,9606.ENSP00000216037,9606.ENSP00000222803,9606.ENSP00000227752,9606.ENSP00000228437,9606.ENSP00000230990,9606.ENSP00000234420,9606.ENSP00000239223,9606.ENSP00000242480,9606.ENSP00000244869,9606.ENSP00000249356,9606.ENSP00000252818,9606.ENSP00000253063,9606.ENSP00000255304,9606.ENSP00000256458,9606.ENSP00000256495,…	SLC2A3,ZNF416,PPP1R15A,ZNF184,XBP1,FKBP14,IL10RA,PRDM4,HBEGF,MSH6,DUSP1,EGR2,EREG,DNAJB9,JUND,SESN2,USPL1,IRAK2,BHLHE40,COG3,IER3,MAPK6,EPC1,IL1A,RAPGEF2,MXD1,ARRDC4,SIK1,SLC20A1,CSRNP1,NRBF2,ZC3H12C,MPZL3,SEC24D,SLC7A11,TRIM36,WHAMM,CXCL3,RP9,SLC25A32,NFIL3,ZNF57,CDC25A,CEBPB,SLC25A33,CXCL8,EIF2AK3,DDIT4,FOSL1,FUT1,NFKBIB,SIAH2,ZNF543,TNFRSF12A,RAB12,RIPK4,NDEL1,ZNF555,GZF1,ZBTB49,ZNF823,MCPH1,A…
GO:2001242	regulation of intrinsic apoptotic signaling pathway	7	159	0.72	0.0066	9606.ENSP00000216037,9606.ENSP00000307235,9606.ENSP00000356438,9606.ENSP00000358022,9606.ENSP00000381282,9606.ENSP00000409555,9606.ENSP00000448665	XBP1,EIF2AK3,PTGS2,MCL1,VIMP,HERPUD1,DDIT3
GO:0010647	positive regulation of cell communication	27	1631	0.3	0.007	9606.ENSP00000216037,9606.ENSP00000230990,9606.ENSP00000244869,9606.ENSP00000256458,9606.ENSP00000264431,9606.ENSP00000264711,9606.ENSP00000321026,9606.ENSP00000326737,9606.ENSP00000344352,9606.ENSP00000346508,9606.ENSP00000349041,9606.ENSP00000356438,9606.ENSP00000356954,9606.ENSP00000358022,9606.ENSP00000358301,9606.ENSP00000358596,9606.ENSP00000360025,9606.ENSP00000360266,9606.ENSP00000360762,…	XBP1,HBEGF,EREG,IRAK2,RAPGEF2,DNAJC27,LURAP1L,TNFRSF12A,ATF3,PDGFA,NRARP,PTGS2,CTGF,MCL1,ADRB1,DUSP5,GADD45A,JUN,ANKRD1,IRS2,EDN1,XDH,CYR61,SYBU,CDKN2AIP,DDIT3,MAP3K14
GO:0032868	response to insulin	8	213	0.65	0.0071	9606.ENSP00000216037,9606.ENSP00000242480,9606.ENSP00000253063,9606.ENSP00000306328,9606.ENSP00000333982,9606.ENSP00000365016,9606.ENSP00000366702,9606.ENSP00000381282	XBP1,EGR2,SESN2,SLC25A33,NDEL1,IRS2,ERRFI1,VIMP
GO:0040008	regulation of growth	15	663	0.43	0.0071	9606.ENSP00000216037,9606.ENSP00000230990,9606.ENSP00000253063,9606.ENSP00000263062,9606.ENSP00000306328,9606.ENSP00000326737,9606.ENSP00000333982,9606.ENSP00000355866,9606.ENSP00000356954,9606.ENSP00000358301,9606.ENSP00000364591,9606.ENSP00000368683,9606.ENSP00000398736,9606.ENSP00000427108,9606.ENSP00000433560	XBP1,HBEGF,SESN2,EPC1,SLC25A33,TNFRSF12A,NDEL1,DUSP10,CTGF,ADRB1,TSPYL2,EDN1,CYR61,CDKN2AIP,CRYAB
GO:0016070	RNA metabolic process	46	3430	0.21	0.0072	9606.ENSP00000196489,9606.ENSP00000211936,9606.ENSP00000216037,9606.ENSP00000228437,9606.ENSP00000242480,9606.ENSP00000244869,9606.ENSP00000252818,9606.ENSP00000256495,9606.ENSP00000263062,9606.ENSP00000264444,9606.ENSP00000273153,9606.ENSP00000277746,9606.ENSP00000297157,9606.ENSP00000297689,9606.ENSP00000303696,9606.ENSP00000305422,9606.ENSP00000306328,9606.ENSP00000310170,9606.ENSP00000312988,…	ZNF416,ZNF184,XBP1,PRDM4,EGR2,EREG,JUND,BHLHE40,EPC1,MXD1,CSRNP1,NRBF2,RP9,NFIL3,ZNF57,CEBPB,SLC25A33,FOSL1,NFKBIB,ZNF543,ZNF555,GZF1,ZBTB49,ZNF823,ATF3,MAFF,ZNF140,CREB5,ZSCAN12,CTGF,PTBP2,JUN,YRDC,ZBTB43,TSPYL2,ZNF165,ZMYM5,ZNF527,JMJD6,NABP1,KLF6,NFXL1,THUMPD2,DDIT3,ZNF699,NR4A3
GO:0044271	cellular nitrogen compound biosynthetic process	47	3528	0.2	0.0072	9606.ENSP00000196489,9606.ENSP00000211936,9606.ENSP00000216037,9606.ENSP00000228437,9606.ENSP00000242480,9606.ENSP00000244869,9606.ENSP00000252818,9606.ENSP00000256495,9606.ENSP00000263062,9606.ENSP00000264444,9606.ENSP00000273153,9606.ENSP00000277746,9606.ENSP00000297689,9606.ENSP00000303696,9606.ENSP00000305422,9606.ENSP00000306328,9606.ENSP00000310170,9606.ENSP00000312988,9606.ENSP00000322545,…	ZNF416,ZNF184,XBP1,PRDM4,EGR2,EREG,JUND,BHLHE40,EPC1,MXD1,CSRNP1,NRBF2,NFIL3,ZNF57,CEBPB,SLC25A33,FOSL1,NFKBIB,ZNF543,ZNF555,GZF1,ZBTB49,ZNF823,ATF3,MAFF,ZNF140,CREB5,ZSCAN12,PTGS2,UAP1,CTGF,JUN,ZBTB43,UGCG,TSPYL2,ZNF165,XDH,ZMYM5,ZNF527,JMJD6,NABP1,KLF6,NFXL1,PGM3,DDIT3,ZNF699,NR4A3
GO:0023056	positive regulation of signaling	27	1638	0.3	0.0073	9606.ENSP00000216037,9606.ENSP00000230990,9606.ENSP00000244869,9606.ENSP00000256458,9606.ENSP00000264431,9606.ENSP00000264711,9606.ENSP00000321026,9606.ENSP00000326737,9606.ENSP00000344352,9606.ENSP00000346508,9606.ENSP00000349041,9606.ENSP00000356438,9606.ENSP00000356954,9606.ENSP00000358022,9606.ENSP00000358301,9606.ENSP00000358596,9606.ENSP00000360025,9606.ENSP00000360266,9606.ENSP00000360762,…	XBP1,HBEGF,EREG,IRAK2,RAPGEF2,DNAJC27,LURAP1L,TNFRSF12A,ATF3,PDGFA,NRARP,PTGS2,CTGF,MCL1,ADRB1,DUSP5,GADD45A,JUN,ANKRD1,IRS2,EDN1,XDH,CYR61,SYBU,CDKN2AIP,DDIT3,MAP3K14
GO:0090304	nucleic acid metabolic process	51	3941	0.19	0.0074	9606.ENSP00000196489,9606.ENSP00000211936,9606.ENSP00000216037,9606.ENSP00000228437,9606.ENSP00000234420,9606.ENSP00000242480,9606.ENSP00000244869,9606.ENSP00000252818,9606.ENSP00000253063,9606.ENSP00000256495,9606.ENSP00000263062,9606.ENSP00000264444,9606.ENSP00000273153,9606.ENSP00000277746,9606.ENSP00000278590,9606.ENSP00000297157,9606.ENSP00000297689,9606.ENSP00000303696,9606.ENSP00000305422,…	ZNF416,ZNF184,XBP1,PRDM4,MSH6,EGR2,EREG,JUND,SESN2,BHLHE40,EPC1,MXD1,CSRNP1,NRBF2,ZC3H12C,RP9,NFIL3,ZNF57,CEBPB,SLC25A33,FOSL1,NFKBIB,ZNF543,ZNF555,GZF1,ZBTB49,ZNF823,ATF3,MAFF,ZNF140,UVRAG,CREB5,ZSCAN12,CTGF,PTBP2,GADD45A,JUN,YRDC,ZBTB43,TSPYL2,ZNF165,ZMYM5,ZNF527,JMJD6,NABP1,KLF6,NFXL1,THUMPD2,DDIT3,ZNF699,NR4A3
GO:1901679	nucleotide transmembrane transport	3	17	1.33	0.0077	9606.ENSP00000297578,9606.ENSP00000306328,9606.ENSP00000362159	SLC25A32,SLC25A33,SLC25A25
GO:0023052	signaling	62	5108	0.16	0.0079	9606.ENSP00000200453,9606.ENSP00000216037,9606.ENSP00000222803,9606.ENSP00000227752,9606.ENSP00000228437,9606.ENSP00000230990,9606.ENSP00000234420,9606.ENSP00000239223,9606.ENSP00000244869,9606.ENSP00000249356,9606.ENSP00000253063,9606.ENSP00000256458,9606.ENSP00000261845,9606.ENSP00000263339,9606.ENSP00000264431,9606.ENSP00000270162,9606.ENSP00000272542,9606.ENSP00000273153,9606.ENSP00000296026,…	PPP1R15A,XBP1,FKBP14,IL10RA,PRDM4,HBEGF,MSH6,DUSP1,EREG,DNAJB9,SESN2,IRAK2,MAPK6,IL1A,RAPGEF2,SIK1,SLC20A1,CSRNP1,CXCL3,CEBPB,SLC25A33,CXCL8,EIF2AK3,DDIT4,NFKBIB,SIAH2,TNFRSF12A,NDEL1,ATF3,INSIG1,PDGFA,NRARP,RASSF1,PTGS2,RGS16,CTGF,MCL1,ADRB1,DUSP5,GADD45A,JUN,GPR3,TSPYL2,RND3,IRS2,EDN1,SEC31A,HRH1,VIMP,JMJD6,CYR61,HERPUD1,SELK,TIPARP,CXCL2,CRYAB,DDIT3,DTNA,DNAJC3,TNFAIP3,NR4A3,MAP3K14
GO:0007154	cell communication	63	5219	0.16	0.008	9606.ENSP00000200453,9606.ENSP00000216037,9606.ENSP00000222803,9606.ENSP00000227752,9606.ENSP00000228437,9606.ENSP00000230990,9606.ENSP00000234420,9606.ENSP00000239223,9606.ENSP00000244869,9606.ENSP00000249356,9606.ENSP00000253063,9606.ENSP00000256458,9606.ENSP00000261845,9606.ENSP00000263339,9606.ENSP00000264431,9606.ENSP00000270162,9606.ENSP00000272542,9606.ENSP00000273153,9606.ENSP00000296026,…	PPP1R15A,XBP1,FKBP14,IL10RA,PRDM4,HBEGF,MSH6,DUSP1,EREG,DNAJB9,SESN2,IRAK2,MAPK6,IL1A,RAPGEF2,SIK1,SLC20A1,CSRNP1,CXCL3,CEBPB,SLC25A33,CXCL8,EIF2AK3,DDIT4,FOSL1,NFKBIB,SIAH2,TNFRSF12A,NDEL1,ATF3,INSIG1,PDGFA,NRARP,RASSF1,PTGS2,RGS16,CTGF,MCL1,ADRB1,DUSP5,GADD45A,JUN,GPR3,TSPYL2,RND3,IRS2,EDN1,SEC31A,HRH1,VIMP,JMJD6,CYR61,HERPUD1,SELK,TIPARP,CXCL2,CRYAB,DDIT3,DTNA,DNAJC3,TNFAIP3,NR4A3,MAP3K14
GO:2001234	negative regulation of apoptotic signaling pathway	8	218	0.64	0.008	9606.ENSP00000216037,9606.ENSP00000263339,9606.ENSP00000322457,9606.ENSP00000356438,9606.ENSP00000358022,9606.ENSP00000381282,9606.ENSP00000409555,9606.ENSP00000481570	XBP1,IL1A,SIAH2,PTGS2,MCL1,VIMP,HERPUD1,TNFAIP3
GO:0045598	regulation of fat cell differentiation	6	120	0.78	0.0084	9606.ENSP00000216037,9606.ENSP00000305422,9606.ENSP00000344741,9606.ENSP00000355866,9606.ENSP00000356438,9606.ENSP00000448665	XBP1,CEBPB,INSIG1,DUSP10,PTGS2,DDIT3
GO:0031401	positive regulation of protein modification process	21	1149	0.34	0.0088	9606.ENSP00000200453,9606.ENSP00000216037,9606.ENSP00000230990,9606.ENSP00000244869,9606.ENSP00000256458,9606.ENSP00000264431,9606.ENSP00000264711,9606.ENSP00000265138,9606.ENSP00000268042,9606.ENSP00000346508,9606.ENSP00000349547,9606.ENSP00000356438,9606.ENSP00000356954,9606.ENSP00000358596,9606.ENSP00000360025,9606.ENSP00000360266,9606.ENSP00000368683,9606.ENSP00000368727,9606.ENSP00000398736,…	PPP1R15A,XBP1,HBEGF,EREG,IRAK2,RAPGEF2,DNAJC27,ARRDC3,ARRDC4,PDGFA,RASSF1,PTGS2,CTGF,DUSP5,GADD45A,JUN,EDN1,XDH,CYR61,DCUN1D2,MAP3K14
GO:0035994	response to muscle stretch	3	18	1.3	0.0088	9606.ENSP00000360266,9606.ENSP00000360762,9606.ENSP00000368683	JUN,ANKRD1,EDN1
GO:0036491	regulation of translation initiation in response to endoplasmic reticulum stress	2	3	1.9	0.0088	9606.ENSP00000307235,9606.ENSP00000473631	EIF2AK3,DNAJC3
GO:2000377	regulation of reactive oxygen species metabolic process	7	169	0.7	0.0088	9606.ENSP00000306328,9606.ENSP00000356438,9606.ENSP00000360025,9606.ENSP00000368683,9606.ENSP00000368727,9606.ENSP00000381282,9606.ENSP00000433560	SLC25A33,PTGS2,GADD45A,EDN1,XDH,VIMP,CRYAB
GO:0009967	positive regulation of signal transduction	25	1493	0.3	0.0092	9606.ENSP00000216037,9606.ENSP00000230990,9606.ENSP00000244869,9606.ENSP00000256458,9606.ENSP00000264431,9606.ENSP00000264711,9606.ENSP00000321026,9606.ENSP00000326737,9606.ENSP00000344352,9606.ENSP00000346508,9606.ENSP00000349041,9606.ENSP00000356954,9606.ENSP00000358022,9606.ENSP00000358301,9606.ENSP00000358596,9606.ENSP00000360025,9606.ENSP00000360266,9606.ENSP00000360762,9606.ENSP00000365016,…	XBP1,HBEGF,EREG,IRAK2,RAPGEF2,DNAJC27,LURAP1L,TNFRSF12A,ATF3,PDGFA,NRARP,CTGF,MCL1,ADRB1,DUSP5,GADD45A,JUN,ANKRD1,IRS2,EDN1,XDH,CYR61,CDKN2AIP,DDIT3,MAP3K14
GO:0071347	cellular response to interleukin-1	6	124	0.76	0.0097	9606.ENSP00000256458,9606.ENSP00000263339,9606.ENSP00000305422,9606.ENSP00000306512,9606.ENSP00000360762,9606.ENSP00000368683	IRAK2,IL1A,CEBPB,CXCL8,ANKRD1,EDN1
GO:1902236	negative regulation of endoplasmic reticulum stress-induced intrinsic apoptotic signaling pathway	3	19	1.28	0.0098	9606.ENSP00000216037,9606.ENSP00000381282,9606.ENSP00000409555	XBP1,VIMP,HERPUD1
GO:0043255	regulation of carbohydrate biosynthetic process	5	83	0.86	0.0105	9606.ENSP00000253063,9606.ENSP00000270162,9606.ENSP00000365016,9606.ENSP00000380247,9606.ENSP00000381282	SESN2,SIK1,IRS2,HRH1,VIMP
GO:0002687	positive regulation of leukocyte migration	6	127	0.75	0.0107	9606.ENSP00000263339,9606.ENSP00000296026,9606.ENSP00000306512,9606.ENSP00000368683,9606.ENSP00000418813,9606.ENSP00000427279	IL1A,CXCL3,CXCL8,EDN1,SELK,CXCL2
GO:0051707	response to other organism	21	1173	0.33	0.0109	9606.ENSP00000216037,9606.ENSP00000227752,9606.ENSP00000252818,9606.ENSP00000256458,9606.ENSP00000296026,9606.ENSP00000305422,9606.ENSP00000306512,9606.ENSP00000307305,9606.ENSP00000310170,9606.ENSP00000312988,9606.ENSP00000331748,9606.ENSP00000355866,9606.ENSP00000356438,9606.ENSP00000360266,9606.ENSP00000360762,9606.ENSP00000368683,9606.ENSP00000381282,9606.ENSP00000427279,9606.ENSP00000473631,…	XBP1,IL10RA,JUND,IRAK2,CXCL3,CEBPB,CXCL8,DDIT4,FOSL1,NFKBIB,RAB12,DUSP10,PTGS2,JUN,ANKRD1,EDN1,VIMP,CXCL2,DNAJC3,TNFAIP3,MAP3K14
GO:0006139	nucleobase-containing compound metabolic process	56	4551	0.17	0.0114	9606.ENSP00000196489,9606.ENSP00000211936,9606.ENSP00000216037,9606.ENSP00000228437,9606.ENSP00000234420,9606.ENSP00000242480,9606.ENSP00000244869,9606.ENSP00000252818,9606.ENSP00000253063,9606.ENSP00000256495,9606.ENSP00000263062,9606.ENSP00000264444,9606.ENSP00000273153,9606.ENSP00000277746,9606.ENSP00000278590,9606.ENSP00000297157,9606.ENSP00000297689,9606.ENSP00000303696,9606.ENSP00000305422,…	ZNF416,ZNF184,XBP1,PRDM4,MSH6,EGR2,EREG,JUND,SESN2,BHLHE40,EPC1,MXD1,CSRNP1,NRBF2,ZC3H12C,RP9,NFIL3,ZNF57,CEBPB,SLC25A33,FOSL1,NFKBIB,ZNF543,ZNF555,GZF1,ZBTB49,ZNF823,ATF3,MAFF,ZNF140,UVRAG,CREB5,ZSCAN12,PTGS2,UAP1,CTGF,PTBP2,GADD45A,JUN,YRDC,SLC25A25,ZBTB43,TSPYL2,ZNF165,XDH,ZMYM5,ZNF527,JMJD6,NABP1,KLF6,NFXL1,THUMPD2,PGM3,DDIT3,ZNF699,NR4A3
GO:1903508	positive regulation of nucleic acid-templated transcription	25	1520	0.3	0.0114	9606.ENSP00000216037,9606.ENSP00000228437,9606.ENSP00000242480,9606.ENSP00000252818,9606.ENSP00000253063,9606.ENSP00000263062,9606.ENSP00000263339,9606.ENSP00000273153,9606.ENSP00000305422,9606.ENSP00000307235,9606.ENSP00000310170,9606.ENSP00000312988,9606.ENSP00000338624,9606.ENSP00000338807,9606.ENSP00000344352,9606.ENSP00000344741,9606.ENSP00000345393,9606.ENSP00000350359,9606.ENSP00000360266,…	XBP1,PRDM4,EGR2,JUND,SESN2,EPC1,IL1A,CSRNP1,CEBPB,EIF2AK3,FOSL1,NFKBIB,TASP1,ZBTB49,ATF3,INSIG1,MAFF,CREB5,JUN,ANKRD1,EDN1,CYR61,KLF6,DDIT3,NR4A3
GO:0019217	regulation of fatty acid metabolic process	5	86	0.84	0.0118	9606.ENSP00000344741,9606.ENSP00000356438,9606.ENSP00000365016,9606.ENSP00000379503,9606.ENSP00000482027	INSIG1,PTGS2,IRS2,PDP1,NR4A3
GO:0006935	chemotaxis	12	491	0.47	0.0122	9606.ENSP00000230990,9606.ENSP00000242480,9606.ENSP00000296026,9606.ENSP00000306512,9606.ENSP00000310170,9606.ENSP00000322457,9606.ENSP00000346508,9606.ENSP00000365016,9606.ENSP00000380247,9606.ENSP00000398736,9606.ENSP00000427279,9606.ENSP00000482027	HBEGF,EGR2,CXCL3,CXCL8,FOSL1,SIAH2,PDGFA,IRS2,HRH1,CYR61,CXCL2,NR4A3
GO:0010035	response to inorganic substance	12	491	0.47	0.0122	9606.ENSP00000239223,9606.ENSP00000252818,9606.ENSP00000263339,9606.ENSP00000307235,9606.ENSP00000310170,9606.ENSP00000356438,9606.ENSP00000360266,9606.ENSP00000368683,9606.ENSP00000378721,9606.ENSP00000433560,9606.ENSP00000481570,9606.ENSP00000482027	DUSP1,JUND,IL1A,EIF2AK3,FOSL1,PTGS2,JUN,EDN1,SEC31A,CRYAB,TNFAIP3,NR4A3
GO:0032058	positive regulation of translational initiation in response to stress	2	4	1.78	0.0122	9606.ENSP00000200453,9606.ENSP00000473631	PPP1R15A,DNAJC3
GO:0045944	positive regulation of transcription by RNA polymerase II	20	1104	0.34	0.0122	9606.ENSP00000216037,9606.ENSP00000228437,9606.ENSP00000242480,9606.ENSP00000252818,9606.ENSP00000253063,9606.ENSP00000263062,9606.ENSP00000263339,9606.ENSP00000273153,9606.ENSP00000305422,9606.ENSP00000310170,9606.ENSP00000338807,9606.ENSP00000344352,9606.ENSP00000344741,9606.ENSP00000345393,9606.ENSP00000360266,9606.ENSP00000368683,9606.ENSP00000398736,9606.ENSP00000419923,9606.ENSP00000448665,…	XBP1,PRDM4,EGR2,JUND,SESN2,EPC1,IL1A,CSRNP1,CEBPB,FOSL1,ZBTB49,ATF3,INSIG1,MAFF,JUN,EDN1,CYR61,KLF6,DDIT3,NR4A3
GO:0051771	negative regulation of nitric-oxide synthase biosynthetic process	2	4	1.78	0.0122	9606.ENSP00000368683,9606.ENSP00000381282	EDN1,VIMP
GO:0010675	regulation of cellular carbohydrate metabolic process	6	133	0.73	0.0127	9606.ENSP00000253063,9606.ENSP00000270162,9606.ENSP00000307305,9606.ENSP00000365016,9606.ENSP00000380247,9606.ENSP00000381282	SESN2,SIK1,DDIT4,IRS2,HRH1,VIMP
GO:0014070	response to organic cyclic compound	17	873	0.37	0.0135	9606.ENSP00000239223,9606.ENSP00000252818,9606.ENSP00000264431,9606.ENSP00000305422,9606.ENSP00000307305,9606.ENSP00000310170,9606.ENSP00000344741,9606.ENSP00000356438,9606.ENSP00000356954,9606.ENSP00000360266,9606.ENSP00000360762,9606.ENSP00000366702,9606.ENSP00000368683,9606.ENSP00000380247,9606.ENSP00000420612,9606.ENSP00000433560,9606.ENSP00000482027	DUSP1,JUND,RAPGEF2,CEBPB,DDIT4,FOSL1,INSIG1,PTGS2,CTGF,JUN,ANKRD1,ERRFI1,EDN1,HRH1,TIPARP,CRYAB,NR4A3
GO:0035914	skeletal muscle cell differentiation	4	52	0.97	0.0139	9606.ENSP00000242480,9606.ENSP00000344352,9606.ENSP00000345393,9606.ENSP00000360762	EGR2,ATF3,MAFF,ANKRD1
GO:0050896	response to stimulus	85	7824	0.12	0.0139	9606.ENSP00000075120,9606.ENSP00000200453,9606.ENSP00000216037,9606.ENSP00000222803,9606.ENSP00000227752,9606.ENSP00000228437,9606.ENSP00000230990,9606.ENSP00000234420,9606.ENSP00000239223,9606.ENSP00000242480,9606.ENSP00000244869,9606.ENSP00000249356,9606.ENSP00000252818,9606.ENSP00000253063,9606.ENSP00000256458,9606.ENSP00000256495,9606.ENSP00000261845,9606.ENSP00000263339,9606.ENSP00000264431,…	SLC2A3,PPP1R15A,XBP1,FKBP14,IL10RA,PRDM4,HBEGF,MSH6,DUSP1,EGR2,EREG,DNAJB9,JUND,SESN2,IRAK2,BHLHE40,MAPK6,IL1A,RAPGEF2,SIK1,SLC20A1,CSRNP1,NRBF2,SLC7A11,CXCL3,SLC25A32,NFIL3,CDC25A,CEBPB,SLC25A33,CXCL8,EIF2AK3,DDIT4,FOSL1,NFKBIB,SIAH2,TNFRSF12A,RAB12,NDEL1,ATF3,INSIG1,MAFF,PDGFA,UVRAG,NRARP,RASSF1,TSC22D2,DUSP10,PTGS2,RGS16,CTGF,MCL1,ADRB1,DUSP5,GADD45A,JUN,ANKRD1,SLC25A25,GPR3,TSPYL2,RND3,IRS2,E…
GO:0008284	positive regulation of cell population proliferation	17	878	0.37	0.0142	9606.ENSP00000216037,9606.ENSP00000230990,9606.ENSP00000244869,9606.ENSP00000306328,9606.ENSP00000310170,9606.ENSP00000344352,9606.ENSP00000346508,9606.ENSP00000349041,9606.ENSP00000356438,9606.ENSP00000356954,9606.ENSP00000360266,9606.ENSP00000365016,9606.ENSP00000368683,9606.ENSP00000398736,9606.ENSP00000418813,9606.ENSP00000481570,9606.ENSP00000482027	XBP1,HBEGF,EREG,SLC25A33,FOSL1,ATF3,PDGFA,NRARP,PTGS2,CTGF,JUN,IRS2,EDN1,CYR61,SELK,TNFAIP3,NR4A3
GO:0071375	cellular response to peptide hormone stimulus	8	245	0.59	0.0144	9606.ENSP00000216037,9606.ENSP00000306328,9606.ENSP00000333982,9606.ENSP00000365016,9606.ENSP00000366702,9606.ENSP00000368683,9606.ENSP00000381282,9606.ENSP00000482027	XBP1,SLC25A33,NDEL1,IRS2,ERRFI1,EDN1,VIMP,NR4A3
GO:0000302	response to reactive oxygen species	7	189	0.65	0.0145	9606.ENSP00000239223,9606.ENSP00000310170,9606.ENSP00000360266,9606.ENSP00000368683,9606.ENSP00000433560,9606.ENSP00000481570,9606.ENSP00000482027	DUSP1,FOSL1,JUN,EDN1,CRYAB,TNFAIP3,NR4A3
GO:0046483	heterocycle metabolic process	57	4716	0.16	0.0145	9606.ENSP00000196489,9606.ENSP00000211936,9606.ENSP00000216037,9606.ENSP00000228437,9606.ENSP00000234420,9606.ENSP00000242480,9606.ENSP00000244869,9606.ENSP00000252818,9606.ENSP00000253063,9606.ENSP00000256495,9606.ENSP00000263062,9606.ENSP00000264444,9606.ENSP00000273153,9606.ENSP00000277746,9606.ENSP00000278590,9606.ENSP00000297157,9606.ENSP00000297578,9606.ENSP00000297689,9606.ENSP00000303696,…	ZNF416,ZNF184,XBP1,PRDM4,MSH6,EGR2,EREG,JUND,SESN2,BHLHE40,EPC1,MXD1,CSRNP1,NRBF2,ZC3H12C,RP9,SLC25A32,NFIL3,ZNF57,CEBPB,SLC25A33,FOSL1,NFKBIB,ZNF543,ZNF555,GZF1,ZBTB49,ZNF823,ATF3,MAFF,ZNF140,UVRAG,CREB5,ZSCAN12,PTGS2,UAP1,CTGF,PTBP2,GADD45A,JUN,YRDC,SLC25A25,ZBTB43,TSPYL2,ZNF165,XDH,ZMYM5,ZNF527,JMJD6,NABP1,KLF6,NFXL1,THUMPD2,PGM3,DDIT3,ZNF699,NR4A3
GO:0009746	response to hexose	6	138	0.72	0.0146	9606.ENSP00000216037,9606.ENSP00000253063,9606.ENSP00000356438,9606.ENSP00000356954,9606.ENSP00000365016,9606.ENSP00000381282	XBP1,SESN2,PTGS2,CTGF,IRS2,VIMP
GO:0046683	response to organophosphorus	6	138	0.72	0.0146	9606.ENSP00000239223,9606.ENSP00000252818,9606.ENSP00000264431,9606.ENSP00000310170,9606.ENSP00000356438,9606.ENSP00000360266	DUSP1,JUND,RAPGEF2,FOSL1,PTGS2,JUN
GO:0051384	response to glucocorticoid	6	138	0.72	0.0146	9606.ENSP00000239223,9606.ENSP00000307305,9606.ENSP00000310170,9606.ENSP00000356438,9606.ENSP00000366702,9606.ENSP00000368683	DUSP1,DDIT4,FOSL1,PTGS2,ERRFI1,EDN1
GO:0019538	protein metabolic process	52	4194	0.17	0.0147	9606.ENSP00000200453,9606.ENSP00000216037,9606.ENSP00000222803,9606.ENSP00000228437,9606.ENSP00000230990,9606.ENSP00000239223,9606.ENSP00000242480,9606.ENSP00000244869,9606.ENSP00000249356,9606.ENSP00000255304,9606.ENSP00000256458,9606.ENSP00000258654,9606.ENSP00000261845,9606.ENSP00000263062,9606.ENSP00000264431,9606.ENSP00000268042,9606.ENSP00000270162,9606.ENSP00000282369,9606.ENSP00000303706,…	PPP1R15A,XBP1,FKBP14,PRDM4,HBEGF,DUSP1,EGR2,EREG,DNAJB9,USPL1,IRAK2,COG3,MAPK6,EPC1,RAPGEF2,ARRDC4,SIK1,TRIM36,CDC25A,EIF2AK3,FUT1,SIAH2,RAB12,RIPK4,NDEL1,TASP1,PDGFA,FUT4,PIM3,DUSP10,DUSP5,LONRF3,IRS2,PIGA,PDP1,VIMP,HERC1,JMJD6,CYR61,HERPUD1,DCUN1D2,SELK,TIPARP,PGM3,CRYAB,USP36,FICD,DDIT3,DNAJC3,NEURL3,TNFAIP3,MAP3K14
GO:0031396	regulation of protein ubiquitination	7	192	0.64	0.0154	9606.ENSP00000265138,9606.ENSP00000268042,9606.ENSP00000322457,9606.ENSP00000349547,9606.ENSP00000409555,9606.ENSP00000417706,9606.ENSP00000481570	ARRDC3,ARRDC4,SIAH2,RASSF1,HERPUD1,DCUN1D2,TNFAIP3
GO:0022402	cell cycle process	17	890	0.36	0.0158	9606.ENSP00000200453,9606.ENSP00000234420,9606.ENSP00000239223,9606.ENSP00000244869,9606.ENSP00000282369,9606.ENSP00000286760,9606.ENSP00000303706,9606.ENSP00000306512,9606.ENSP00000333982,9606.ENSP00000338807,9606.ENSP00000342924,9606.ENSP00000348455,9606.ENSP00000349547,9606.ENSP00000360025,9606.ENSP00000403683,9606.ENSP00000448665,9606.ENSP00000484532	PPP1R15A,MSH6,DUSP1,EREG,TRIM36,WHAMM,CDC25A,CXCL8,NDEL1,ZBTB49,MCPH1,UVRAG,RASSF1,GADD45A,NABP1,DDIT3,MIS12
GO:0050678	regulation of epithelial cell proliferation	9	311	0.54	0.0158	9606.ENSP00000216037,9606.ENSP00000244869,9606.ENSP00000349041,9606.ENSP00000355866,9606.ENSP00000360266,9606.ENSP00000366702,9606.ENSP00000368727,9606.ENSP00000481570,9606.ENSP00000482027	XBP1,EREG,NRARP,DUSP10,JUN,ERRFI1,XDH,TNFAIP3,NR4A3
GO:0032870	cellular response to hormone stimulus	13	585	0.43	0.016	9606.ENSP00000216037,9606.ENSP00000239223,9606.ENSP00000252818,9606.ENSP00000270162,9606.ENSP00000306328,9606.ENSP00000307305,9606.ENSP00000333982,9606.ENSP00000360266,9606.ENSP00000365016,9606.ENSP00000366702,9606.ENSP00000368683,9606.ENSP00000381282,9606.ENSP00000482027	XBP1,DUSP1,JUND,SIK1,SLC25A33,DDIT4,NDEL1,JUN,IRS2,ERRFI1,EDN1,VIMP,NR4A3
GO:0061448	connective tissue development	7	194	0.64	0.0161	9606.ENSP00000216037,9606.ENSP00000265138,9606.ENSP00000307235,9606.ENSP00000356954,9606.ENSP00000362159,9606.ENSP00000368683,9606.ENSP00000398736	XBP1,ARRDC3,EIF2AK3,CTGF,SLC25A25,EDN1,CYR61
GO:1901360	organic cyclic compound metabolic process	59	4963	0.15	0.0166	9606.ENSP00000196489,9606.ENSP00000211936,9606.ENSP00000216037,9606.ENSP00000228437,9606.ENSP00000234420,9606.ENSP00000242480,9606.ENSP00000244869,9606.ENSP00000252818,9606.ENSP00000253063,9606.ENSP00000256495,9606.ENSP00000263062,9606.ENSP00000264444,9606.ENSP00000273153,9606.ENSP00000277746,9606.ENSP00000278590,9606.ENSP00000297157,9606.ENSP00000297578,9606.ENSP00000297689,9606.ENSP00000303696,…	ZNF416,ZNF184,XBP1,PRDM4,MSH6,EGR2,EREG,JUND,SESN2,BHLHE40,EPC1,MXD1,CSRNP1,NRBF2,ZC3H12C,RP9,SLC25A32,NFIL3,ZNF57,CEBPB,SLC25A33,FOSL1,NFKBIB,ZNF543,ZNF555,GZF1,ZBTB49,ZNF823,ATF3,INSIG1,MAFF,ZNF140,UVRAG,CREB5,ZSCAN12,PTGS2,UAP1,CTGF,PTBP2,GADD45A,JUN,YRDC,SLC25A25,ZBTB43,TSPYL2,ZNF165,XDH,ZMYM5,ZNF527,JMJD6,NABP1,KLF6,TIPARP,NFXL1,THUMPD2,PGM3,DDIT3,ZNF699,NR4A3
GO:0032501	multicellular organismal process	73	6507	0.13	0.0167	9606.ENSP00000216037,9606.ENSP00000230990,9606.ENSP00000234420,9606.ENSP00000239223,9606.ENSP00000242480,9606.ENSP00000244869,9606.ENSP00000249356,9606.ENSP00000252818,9606.ENSP00000256495,9606.ENSP00000261845,9606.ENSP00000263062,9606.ENSP00000263339,9606.ENSP00000264431,9606.ENSP00000264444,9606.ENSP00000265138,9606.ENSP00000270162,9606.ENSP00000272542,9606.ENSP00000273153,9606.ENSP00000278949,…	XBP1,HBEGF,MSH6,DUSP1,EGR2,EREG,DNAJB9,JUND,BHLHE40,MAPK6,EPC1,IL1A,RAPGEF2,MXD1,ARRDC3,SIK1,SLC20A1,CSRNP1,MPZL3,SEC24D,SLC7A11,RP9,CEBPB,CXCL8,EIF2AK3,DDIT4,FOSL1,LINS,SIAH2,TNFRSF12A,NDEL1,GZF1,MCPH1,ATF3,INSIG1,MAFF,PDGFA,NRARP,LRIG2,DUSP10,PTGS2,RGS16,SUCO,CTGF,TUFT1,MCL1,ADRB1,DUSP5,PTBP2,JUN,PARD6B,ANKRD1,SLC25A25,IRS2,ERRFI1,GPCPD1,EDN1,XDH,ZMYM5,HRH1,HERC1,JMJD6,CYR61,SYBU,KLF6,TIPARP,PG…
GO:2001243	negative regulation of intrinsic apoptotic signaling pathway	5	96	0.8	0.0167	9606.ENSP00000216037,9606.ENSP00000356438,9606.ENSP00000358022,9606.ENSP00000381282,9606.ENSP00000409555	XBP1,PTGS2,MCL1,VIMP,HERPUD1
GO:0006725	cellular aromatic compound metabolic process	57	4754	0.16	0.0168	9606.ENSP00000196489,9606.ENSP00000211936,9606.ENSP00000216037,9606.ENSP00000228437,9606.ENSP00000234420,9606.ENSP00000242480,9606.ENSP00000244869,9606.ENSP00000252818,9606.ENSP00000253063,9606.ENSP00000256495,9606.ENSP00000263062,9606.ENSP00000264444,9606.ENSP00000273153,9606.ENSP00000277746,9606.ENSP00000278590,9606.ENSP00000297157,9606.ENSP00000297578,9606.ENSP00000297689,9606.ENSP00000303696,…	ZNF416,ZNF184,XBP1,PRDM4,MSH6,EGR2,EREG,JUND,SESN2,BHLHE40,EPC1,MXD1,CSRNP1,NRBF2,ZC3H12C,RP9,SLC25A32,NFIL3,ZNF57,CEBPB,SLC25A33,FOSL1,NFKBIB,ZNF543,ZNF555,GZF1,ZBTB49,ZNF823,ATF3,MAFF,ZNF140,UVRAG,CREB5,ZSCAN12,PTGS2,UAP1,CTGF,PTBP2,GADD45A,JUN,YRDC,SLC25A25,ZBTB43,TSPYL2,ZNF165,XDH,ZMYM5,ZNF527,JMJD6,NABP1,KLF6,NFXL1,THUMPD2,PGM3,DDIT3,ZNF699,NR4A3
GO:0010629	negative regulation of gene expression	26	1670	0.27	0.017	9606.ENSP00000216037,9606.ENSP00000244869,9606.ENSP00000252818,9606.ENSP00000253063,9606.ENSP00000256495,9606.ENSP00000263062,9606.ENSP00000264444,9606.ENSP00000297689,9606.ENSP00000305422,9606.ENSP00000307235,9606.ENSP00000338290,9606.ENSP00000342924,9606.ENSP00000344352,9606.ENSP00000347755,9606.ENSP00000349041,9606.ENSP00000356954,9606.ENSP00000359216,9606.ENSP00000360266,9606.ENSP00000360762,…	XBP1,EREG,JUND,SESN2,BHLHE40,EPC1,MXD1,NFIL3,CEBPB,EIF2AK3,GZF1,MCPH1,ATF3,ZNF140,NRARP,CTGF,PTBP2,JUN,ANKRD1,EDN1,XDH,TIPARP,NFXL1,CRYAB,DDIT3,NR4A3
GO:0031400	negative regulation of protein modification process	13	592	0.42	0.0173	9606.ENSP00000200453,9606.ENSP00000216037,9606.ENSP00000239223,9606.ENSP00000307305,9606.ENSP00000344352,9606.ENSP00000355866,9606.ENSP00000358596,9606.ENSP00000360025,9606.ENSP00000360266,9606.ENSP00000366702,9606.ENSP00000368727,9606.ENSP00000473631,9606.ENSP00000481570	PPP1R15A,XBP1,DUSP1,DDIT4,ATF3,DUSP10,DUSP5,GADD45A,JUN,ERRFI1,XDH,DNAJC3,TNFAIP3
GO:0051591	response to cAMP	5	98	0.79	0.018	9606.ENSP00000239223,9606.ENSP00000252818,9606.ENSP00000264431,9606.ENSP00000310170,9606.ENSP00000360266	DUSP1,JUND,RAPGEF2,FOSL1,JUN
GO:0045935	positive regulation of nucleobase-containing compound metabolic process	27	1770	0.26	0.0181	9606.ENSP00000216037,9606.ENSP00000228437,9606.ENSP00000234420,9606.ENSP00000242480,9606.ENSP00000244869,9606.ENSP00000252818,9606.ENSP00000253063,9606.ENSP00000263062,9606.ENSP00000263339,9606.ENSP00000273153,9606.ENSP00000305422,9606.ENSP00000307235,9606.ENSP00000310170,9606.ENSP00000312988,9606.ENSP00000338624,9606.ENSP00000338807,9606.ENSP00000344352,9606.ENSP00000344741,9606.ENSP00000345393,…	XBP1,PRDM4,MSH6,EGR2,EREG,JUND,SESN2,EPC1,IL1A,CSRNP1,CEBPB,EIF2AK3,FOSL1,NFKBIB,TASP1,ZBTB49,ATF3,INSIG1,MAFF,CREB5,JUN,ANKRD1,EDN1,CYR61,KLF6,DDIT3,NR4A3
GO:0000188	inactivation of MAPK activity	3	26	1.14	0.0187	9606.ENSP00000239223,9606.ENSP00000355866,9606.ENSP00000358596	DUSP1,DUSP10,DUSP5
GO:0045669	positive regulation of osteoblast differentiation	4	58	0.92	0.0187	9606.ENSP00000252818,9606.ENSP00000305422,9606.ENSP00000356696,9606.ENSP00000398736	JUND,CEBPB,SUCO,CYR61
GO:0045444	fat cell differentiation	5	100	0.78	0.0192	9606.ENSP00000242480,9606.ENSP00000305422,9606.ENSP00000356438,9606.ENSP00000358301,9606.ENSP00000482027	EGR2,CEBPB,PTGS2,ADRB1,NR4A3
GO:0032792	negative regulation of CREB transcription factor activity	2	6	1.6	0.0196	9606.ENSP00000270162,9606.ENSP00000448665	SIK1,DDIT3
GO:0051896	regulation of protein kinase B signaling	7	203	0.62	0.0196	9606.ENSP00000216037,9606.ENSP00000230990,9606.ENSP00000244869,9606.ENSP00000346508,9606.ENSP00000365016,9606.ENSP00000368727,9606.ENSP00000448665	XBP1,HBEGF,EREG,PDGFA,IRS2,XDH,DDIT3
GO:0061043	regulation of vascular wound healing	2	6	1.6	0.0196	9606.ENSP00000216037,9606.ENSP00000481570	XBP1,TNFAIP3
GO:0010575	positive regulation of vascular endothelial growth factor production	3	27	1.13	0.0201	9606.ENSP00000263339,9606.ENSP00000307235,9606.ENSP00000356438	IL1A,EIF2AK3,PTGS2
GO:0014074	response to purine-containing compound	6	151	0.68	0.0206	9606.ENSP00000239223,9606.ENSP00000252818,9606.ENSP00000264431,9606.ENSP00000310170,9606.ENSP00000356438,9606.ENSP00000360266	DUSP1,JUND,RAPGEF2,FOSL1,PTGS2,JUN
GO:0043200	response to amino acid	5	103	0.77	0.0213	9606.ENSP00000216037,9606.ENSP00000253063,9606.ENSP00000305422,9606.ENSP00000356954,9606.ENSP00000368683	XBP1,SESN2,CEBPB,CTGF,EDN1
GO:0045893	positive regulation of transcription, DNA-templated	23	1435	0.28	0.0213	9606.ENSP00000216037,9606.ENSP00000228437,9606.ENSP00000242480,9606.ENSP00000252818,9606.ENSP00000253063,9606.ENSP00000263062,9606.ENSP00000263339,9606.ENSP00000273153,9606.ENSP00000305422,9606.ENSP00000307235,9606.ENSP00000310170,9606.ENSP00000338624,9606.ENSP00000338807,9606.ENSP00000344352,9606.ENSP00000344741,9606.ENSP00000345393,9606.ENSP00000350359,9606.ENSP00000360266,9606.ENSP00000368683,…	XBP1,PRDM4,EGR2,JUND,SESN2,EPC1,IL1A,CSRNP1,CEBPB,EIF2AK3,FOSL1,TASP1,ZBTB49,ATF3,INSIG1,MAFF,CREB5,JUN,EDN1,CYR61,KLF6,DDIT3,NR4A3
GO:0072593	reactive oxygen species metabolic process	5	103	0.77	0.0213	9606.ENSP00000253063,9606.ENSP00000307305,9606.ENSP00000356954,9606.ENSP00000368683,9606.ENSP00000398736	SESN2,DDIT4,CTGF,EDN1,CYR61
GO:0032869	cellular response to insulin stimulus	6	153	0.67	0.0216	9606.ENSP00000216037,9606.ENSP00000306328,9606.ENSP00000333982,9606.ENSP00000365016,9606.ENSP00000366702,9606.ENSP00000381282	XBP1,SLC25A33,NDEL1,IRS2,ERRFI1,VIMP
GO:0050873	brown fat cell differentiation	3	28	1.11	0.0216	9606.ENSP00000305422,9606.ENSP00000356438,9606.ENSP00000358301	CEBPB,PTGS2,ADRB1
GO:0065008	regulation of biological quality	45	3559	0.18	0.0217	9606.ENSP00000200453,9606.ENSP00000216037,9606.ENSP00000227752,9606.ENSP00000242480,9606.ENSP00000253063,9606.ENSP00000258654,9606.ENSP00000263339,9606.ENSP00000264431,9606.ENSP00000265138,9606.ENSP00000280612,9606.ENSP00000286760,9606.ENSP00000297578,9606.ENSP00000306328,9606.ENSP00000326737,9606.ENSP00000333982,9606.ENSP00000344741,9606.ENSP00000345393,9606.ENSP00000346508,9606.ENSP00000348455,…	PPP1R15A,XBP1,IL10RA,EGR2,SESN2,COG3,IL1A,RAPGEF2,ARRDC3,SLC7A11,WHAMM,SLC25A32,SLC25A33,TNFRSF12A,NDEL1,INSIG1,MAFF,PDGFA,UVRAG,RASSF1,PIM3,PTGS2,CTGF,MCL1,ADRB1,JUN,YRDC,IRS2,GPCPD1,EDN1,XDH,CDC37L1,HRH1,VIMP,JMJD6,SYBU,HERPUD1,SELK,TIPARP,CDKN2AIP,CRYAB,USP36,DDIT3,TNFAIP3,NR4A3
GO:0009636	response to toxic substance	11	468	0.45	0.0221	9606.ENSP00000239223,9606.ENSP00000253063,9606.ENSP00000280612,9606.ENSP00000310170,9606.ENSP00000356438,9606.ENSP00000360266,9606.ENSP00000368683,9606.ENSP00000381282,9606.ENSP00000433560,9606.ENSP00000481570,9606.ENSP00000482027	DUSP1,SESN2,SLC7A11,FOSL1,PTGS2,JUN,EDN1,VIMP,CRYAB,TNFAIP3,NR4A3
GO:0044093	positive regulation of molecular function	26	1713	0.26	0.0224	9606.ENSP00000200453,9606.ENSP00000234420,9606.ENSP00000244869,9606.ENSP00000256458,9606.ENSP00000264431,9606.ENSP00000265138,9606.ENSP00000268042,9606.ENSP00000307235,9606.ENSP00000310170,9606.ENSP00000332454,9606.ENSP00000333982,9606.ENSP00000346508,9606.ENSP00000356529,9606.ENSP00000356954,9606.ENSP00000358301,9606.ENSP00000358596,9606.ENSP00000360025,9606.ENSP00000360266,9606.ENSP00000366702,…	PPP1R15A,MSH6,EREG,IRAK2,RAPGEF2,ARRDC3,ARRDC4,EIF2AK3,FOSL1,RIPK4,NDEL1,PDGFA,RGS16,CTGF,ADRB1,DUSP5,GADD45A,JUN,ERRFI1,EDN1,XDH,CYR61,HERPUD1,DCUN1D2,DDIT3,MAP3K14
GO:0033673	negative regulation of kinase activity	8	271	0.55	0.0232	9606.ENSP00000239223,9606.ENSP00000355866,9606.ENSP00000358596,9606.ENSP00000360025,9606.ENSP00000365016,9606.ENSP00000366702,9606.ENSP00000473631,9606.ENSP00000481570	DUSP1,DUSP10,DUSP5,GADD45A,IRS2,ERRFI1,DNAJC3,TNFAIP3
GO:0051385	response to mineralocorticoid	3	29	1.09	0.0234	9606.ENSP00000310170,9606.ENSP00000356954,9606.ENSP00000368683	FOSL1,CTGF,EDN1
GO:0032055	negative regulation of translation in response to stress	2	7	1.54	0.0238	9606.ENSP00000253063,9606.ENSP00000307235	SESN2,EIF2AK3
GO:2000347	positive regulation of hepatocyte proliferation	2	7	1.54	0.0238	9606.ENSP00000216037,9606.ENSP00000481570	XBP1,TNFAIP3
GO:0007167	enzyme linked receptor protein signaling pathway	14	698	0.38	0.024	9606.ENSP00000216037,9606.ENSP00000230990,9606.ENSP00000244869,9606.ENSP00000264431,9606.ENSP00000273153,9606.ENSP00000307235,9606.ENSP00000307305,9606.ENSP00000333982,9606.ENSP00000346508,9606.ENSP00000356954,9606.ENSP00000360266,9606.ENSP00000365016,9606.ENSP00000420612,9606.ENSP00000482027	XBP1,HBEGF,EREG,RAPGEF2,CSRNP1,EIF2AK3,DDIT4,NDEL1,PDGFA,CTGF,JUN,IRS2,TIPARP,NR4A3
GO:0043409	negative regulation of MAPK cascade	6	158	0.66	0.0243	9606.ENSP00000216037,9606.ENSP00000239223,9606.ENSP00000344352,9606.ENSP00000355866,9606.ENSP00000358596,9606.ENSP00000366702	XBP1,DUSP1,ATF3,DUSP10,DUSP5,ERRFI1
GO:0050890	cognition	8	274	0.54	0.0243	9606.ENSP00000242480,9606.ENSP00000297157,9606.ENSP00000305422,9606.ENSP00000310170,9606.ENSP00000318423,9606.ENSP00000356438,9606.ENSP00000360266,9606.ENSP00000380247	EGR2,RP9,CEBPB,FOSL1,LINS,PTGS2,JUN,HRH1
GO:2001236	regulation of extrinsic apoptotic signaling pathway	6	158	0.66	0.0243	9606.ENSP00000263339,9606.ENSP00000322457,9606.ENSP00000326737,9606.ENSP00000344352,9606.ENSP00000358022,9606.ENSP00000481570	IL1A,SIAH2,TNFRSF12A,ATF3,MCL1,TNFAIP3
GO:0001503	ossification	7	215	0.59	0.0248	9606.ENSP00000252818,9606.ENSP00000307235,9606.ENSP00000356438,9606.ENSP00000356696,9606.ENSP00000356954,9606.ENSP00000357842,9606.ENSP00000398736	JUND,EIF2AK3,PTGS2,SUCO,CTGF,TUFT1,CYR61
GO:0010259	multicellular organism aging	3	30	1.08	0.0248	9606.ENSP00000234420,9606.ENSP00000368683,9606.ENSP00000433560	MSH6,EDN1,CRYAB
GO:0030307	positive regulation of cell growth	6	159	0.66	0.0248	9606.ENSP00000230990,9606.ENSP00000306328,9606.ENSP00000326737,9606.ENSP00000333982,9606.ENSP00000368683,9606.ENSP00000427108	HBEGF,SLC25A33,TNFRSF12A,NDEL1,EDN1,CDKN2AIP
GO:0010628	positive regulation of gene expression	27	1826	0.25	0.0252	9606.ENSP00000200453,9606.ENSP00000216037,9606.ENSP00000228437,9606.ENSP00000242480,9606.ENSP00000252818,9606.ENSP00000253063,9606.ENSP00000263062,9606.ENSP00000263339,9606.ENSP00000273153,9606.ENSP00000297689,9606.ENSP00000305422,9606.ENSP00000307235,9606.ENSP00000310170,9606.ENSP00000338624,9606.ENSP00000338807,9606.ENSP00000344352,9606.ENSP00000344741,9606.ENSP00000345393,9606.ENSP00000350359,…	PPP1R15A,XBP1,PRDM4,EGR2,JUND,SESN2,EPC1,IL1A,CSRNP1,NFIL3,CEBPB,EIF2AK3,FOSL1,TASP1,ZBTB49,ATF3,INSIG1,MAFF,CREB5,CTGF,JUN,EDN1,CYR61,KLF6,DDIT3,DNAJC3,NR4A3
GO:0051128	regulation of cellular component organization	32	2306	0.22	0.0265	9606.ENSP00000200453,9606.ENSP00000216037,9606.ENSP00000227752,9606.ENSP00000230990,9606.ENSP00000239223,9606.ENSP00000244869,9606.ENSP00000253063,9606.ENSP00000261845,9606.ENSP00000263339,9606.ENSP00000264431,9606.ENSP00000282369,9606.ENSP00000286760,9606.ENSP00000306328,9606.ENSP00000310170,9606.ENSP00000326737,9606.ENSP00000333982,9606.ENSP00000342924,9606.ENSP00000344741,9606.ENSP00000346508,…	PPP1R15A,XBP1,IL10RA,HBEGF,DUSP1,EREG,SESN2,MAPK6,IL1A,RAPGEF2,TRIM36,WHAMM,SLC25A33,FOSL1,TNFRSF12A,NDEL1,MCPH1,INSIG1,PDGFA,UVRAG,RASSF1,LRIG2,CTGF,JUN,ANKRD1,GPR3,TSPYL2,EDN1,ZMYM5,CYR61,CDKN2AIP,CRYAB
GO:1901576	organic substance biosynthetic process	55	4656	0.15	0.0265	9606.ENSP00000196489,9606.ENSP00000211936,9606.ENSP00000216037,9606.ENSP00000228437,9606.ENSP00000242480,9606.ENSP00000244869,9606.ENSP00000252818,9606.ENSP00000256495,9606.ENSP00000258654,9606.ENSP00000263062,9606.ENSP00000264444,9606.ENSP00000273153,9606.ENSP00000277746,9606.ENSP00000297689,9606.ENSP00000303696,9606.ENSP00000305422,9606.ENSP00000306328,9606.ENSP00000310170,9606.ENSP00000312021,…	ZNF416,ZNF184,XBP1,PRDM4,EGR2,EREG,JUND,BHLHE40,COG3,EPC1,MXD1,CSRNP1,NRBF2,NFIL3,ZNF57,CEBPB,SLC25A33,FOSL1,FUT1,NFKBIB,ZNF543,ZNF555,GZF1,ZBTB49,ZNF823,ATF3,INSIG1,MAFF,ZNF140,CREB5,FUT4,ZSCAN12,PTGS2,UAP1,CTGF,JUN,ZBTB43,UGCG,TSPYL2,IRS2,ZNF165,EDN1,XDH,PIGA,ZMYM5,ZNF527,JMJD6,NABP1,SELK,KLF6,NFXL1,PGM3,DDIT3,ZNF699,NR4A3
GO:0044092	negative regulation of molecular function	19	1119	0.31	0.0266	9606.ENSP00000200453,9606.ENSP00000239223,9606.ENSP00000256458,9606.ENSP00000256495,9606.ENSP00000270162,9606.ENSP00000322457,9606.ENSP00000355866,9606.ENSP00000356438,9606.ENSP00000358596,9606.ENSP00000360025,9606.ENSP00000360266,9606.ENSP00000365016,9606.ENSP00000366702,9606.ENSP00000409555,9606.ENSP00000433560,9606.ENSP00000446479,9606.ENSP00000448665,9606.ENSP00000473631,9606.ENSP00000481570	PPP1R15A,DUSP1,IRAK2,BHLHE40,SIK1,SIAH2,DUSP10,PTGS2,DUSP5,GADD45A,JUN,IRS2,ERRFI1,HERPUD1,CRYAB,FICD,DDIT3,DNAJC3,TNFAIP3
GO:0043085	positive regulation of catalytic activity	22	1381	0.28	0.0267	9606.ENSP00000200453,9606.ENSP00000234420,9606.ENSP00000244869,9606.ENSP00000256458,9606.ENSP00000264431,9606.ENSP00000265138,9606.ENSP00000268042,9606.ENSP00000307235,9606.ENSP00000333982,9606.ENSP00000346508,9606.ENSP00000356529,9606.ENSP00000356954,9606.ENSP00000358301,9606.ENSP00000358596,9606.ENSP00000360025,9606.ENSP00000360266,9606.ENSP00000366702,9606.ENSP00000368683,9606.ENSP00000368727,…	PPP1R15A,MSH6,EREG,IRAK2,RAPGEF2,ARRDC3,ARRDC4,EIF2AK3,NDEL1,PDGFA,RGS16,CTGF,ADRB1,DUSP5,GADD45A,JUN,ERRFI1,EDN1,XDH,CYR61,DCUN1D2,MAP3K14
GO:0009750	response to fructose	2	8	1.48	0.028	9606.ENSP00000216037,9606.ENSP00000356438	XBP1,PTGS2
GO:0070417	cellular response to cold	2	8	1.48	0.028	9606.ENSP00000307235,9606.ENSP00000473631	EIF2AK3,DNAJC3
GO:1903071	positive regulation of ER-associated ubiquitin-dependent protein catabolic process	2	8	1.48	0.028	9606.ENSP00000216037,9606.ENSP00000409555	XBP1,HERPUD1
GO:0044249	cellular biosynthetic process	54	4567	0.15	0.0281	9606.ENSP00000196489,9606.ENSP00000211936,9606.ENSP00000216037,9606.ENSP00000228437,9606.ENSP00000242480,9606.ENSP00000244869,9606.ENSP00000252818,9606.ENSP00000256495,9606.ENSP00000258654,9606.ENSP00000263062,9606.ENSP00000264444,9606.ENSP00000273153,9606.ENSP00000277746,9606.ENSP00000297689,9606.ENSP00000303696,9606.ENSP00000305422,9606.ENSP00000306328,9606.ENSP00000310170,9606.ENSP00000312021,…	ZNF416,ZNF184,XBP1,PRDM4,EGR2,EREG,JUND,BHLHE40,COG3,EPC1,MXD1,CSRNP1,NRBF2,NFIL3,ZNF57,CEBPB,SLC25A33,FOSL1,FUT1,NFKBIB,ZNF543,ZNF555,GZF1,ZBTB49,ZNF823,ATF3,MAFF,ZNF140,CREB5,FUT4,ZSCAN12,PTGS2,UAP1,CTGF,JUN,ZBTB43,UGCG,TSPYL2,IRS2,ZNF165,EDN1,XDH,PIGA,ZMYM5,ZNF527,JMJD6,NABP1,SELK,KLF6,NFXL1,PGM3,DDIT3,ZNF699,NR4A3
GO:0045923	positive regulation of fatty acid metabolic process	3	32	1.05	0.0281	9606.ENSP00000356438,9606.ENSP00000365016,9606.ENSP00000482027	PTGS2,IRS2,NR4A3
GO:0050793	regulation of developmental process	33	2416	0.21	0.0281	9606.ENSP00000216037,9606.ENSP00000234420,9606.ENSP00000244869,9606.ENSP00000252818,9606.ENSP00000261845,9606.ENSP00000263339,9606.ENSP00000264431,9606.ENSP00000270162,9606.ENSP00000305422,9606.ENSP00000306512,9606.ENSP00000307235,9606.ENSP00000326737,9606.ENSP00000333982,9606.ENSP00000344741,9606.ENSP00000345393,9606.ENSP00000346508,9606.ENSP00000349041,9606.ENSP00000355396,9606.ENSP00000355866,…	XBP1,MSH6,EREG,JUND,MAPK6,IL1A,RAPGEF2,SIK1,CEBPB,CXCL8,EIF2AK3,TNFRSF12A,NDEL1,INSIG1,MAFF,PDGFA,NRARP,LRIG2,DUSP10,PTGS2,SUCO,CTGF,ADRB1,JUN,ANKRD1,ERRFI1,EDN1,XDH,ZMYM5,CYR61,DDIT3,TNFAIP3,NR4A3
GO:0060612	adipose tissue development	3	32	1.05	0.0281	9606.ENSP00000216037,9606.ENSP00000265138,9606.ENSP00000362159	XBP1,ARRDC3,SLC25A25
GO:0051253	negative regulation of RNA metabolic process	21	1303	0.29	0.0283	9606.ENSP00000216037,9606.ENSP00000244869,9606.ENSP00000252818,9606.ENSP00000256495,9606.ENSP00000263062,9606.ENSP00000264444,9606.ENSP00000297689,9606.ENSP00000305422,9606.ENSP00000322457,9606.ENSP00000338290,9606.ENSP00000342924,9606.ENSP00000344352,9606.ENSP00000347755,9606.ENSP00000349041,9606.ENSP00000359216,9606.ENSP00000360266,9606.ENSP00000360762,9606.ENSP00000368683,9606.ENSP00000422037,…	XBP1,EREG,JUND,BHLHE40,EPC1,MXD1,NFIL3,CEBPB,SIAH2,GZF1,MCPH1,ATF3,ZNF140,NRARP,PTBP2,JUN,ANKRD1,EDN1,NFXL1,DDIT3,NR4A3
GO:0010467	gene expression	46	3733	0.17	0.029	9606.ENSP00000196489,9606.ENSP00000211936,9606.ENSP00000216037,9606.ENSP00000228437,9606.ENSP00000242480,9606.ENSP00000244869,9606.ENSP00000252818,9606.ENSP00000256495,9606.ENSP00000263062,9606.ENSP00000264444,9606.ENSP00000273153,9606.ENSP00000277746,9606.ENSP00000297157,9606.ENSP00000297689,9606.ENSP00000303696,9606.ENSP00000305422,9606.ENSP00000306328,9606.ENSP00000310170,9606.ENSP00000312988,…	ZNF416,ZNF184,XBP1,PRDM4,EGR2,EREG,JUND,BHLHE40,EPC1,MXD1,CSRNP1,NRBF2,RP9,NFIL3,ZNF57,CEBPB,SLC25A33,FOSL1,NFKBIB,ZNF543,ZNF555,GZF1,ZBTB49,ZNF823,ATF3,MAFF,ZNF140,CREB5,ZSCAN12,CTGF,PTBP2,JUN,YRDC,ZBTB43,TSPYL2,ZNF165,ZMYM5,ZNF527,JMJD6,NABP1,KLF6,NFXL1,THUMPD2,DDIT3,ZNF699,NR4A3
GO:1900182	positive regulation of protein localization to nucleus	4	69	0.84	0.0292	9606.ENSP00000216037,9606.ENSP00000253063,9606.ENSP00000307235,9606.ENSP00000356438	XBP1,SESN2,EIF2AK3,PTGS2
GO:1903507	negative regulation of nucleic acid-templated transcription	20	1220	0.29	0.0292	9606.ENSP00000216037,9606.ENSP00000244869,9606.ENSP00000252818,9606.ENSP00000256495,9606.ENSP00000263062,9606.ENSP00000264444,9606.ENSP00000297689,9606.ENSP00000305422,9606.ENSP00000322457,9606.ENSP00000338290,9606.ENSP00000342924,9606.ENSP00000344352,9606.ENSP00000347755,9606.ENSP00000349041,9606.ENSP00000360266,9606.ENSP00000360762,9606.ENSP00000368683,9606.ENSP00000422037,9606.ENSP00000448665,…	XBP1,EREG,JUND,BHLHE40,EPC1,MXD1,NFIL3,CEBPB,SIAH2,GZF1,MCPH1,ATF3,ZNF140,NRARP,JUN,ANKRD1,EDN1,NFXL1,DDIT3,NR4A3
GO:0032879	regulation of localization	34	2524	0.21	0.0293	9606.ENSP00000216037,9606.ENSP00000230990,9606.ENSP00000244869,9606.ENSP00000253063,9606.ENSP00000263339,9606.ENSP00000264431,9606.ENSP00000264711,9606.ENSP00000270162,9606.ENSP00000296026,9606.ENSP00000305422,9606.ENSP00000306512,9606.ENSP00000307235,9606.ENSP00000333982,9606.ENSP00000344741,9606.ENSP00000346508,9606.ENSP00000348455,9606.ENSP00000353824,9606.ENSP00000355396,9606.ENSP00000355866,…	XBP1,HBEGF,EREG,SESN2,IL1A,RAPGEF2,DNAJC27,SIK1,CXCL3,CEBPB,CXCL8,EIF2AK3,NDEL1,INSIG1,PDGFA,UVRAG,PIM3,LRIG2,DUSP10,PTGS2,JUN,PARD6B,ANKRD1,YRDC,IRS2,EDN1,VIMP,CYR61,SYBU,SELK,CXCL2,CRYAB,DDIT3,NR4A3
GO:0007517	muscle organ development	8	287	0.52	0.0295	9606.ENSP00000216037,9606.ENSP00000230990,9606.ENSP00000242480,9606.ENSP00000344352,9606.ENSP00000345393,9606.ENSP00000360762,9606.ENSP00000368305,9606.ENSP00000433560	XBP1,HBEGF,EGR2,ATF3,MAFF,ANKRD1,GPCPD1,CRYAB
GO:0001659	temperature homeostasis	3	33	1.04	0.0296	9606.ENSP00000263339,9606.ENSP00000265138,9606.ENSP00000358301	IL1A,ARRDC3,ADRB1
GO:0045937	positive regulation of phosphate metabolic process	18	1052	0.31	0.0299	9606.ENSP00000200453,9606.ENSP00000216037,9606.ENSP00000230990,9606.ENSP00000244869,9606.ENSP00000256458,9606.ENSP00000264431,9606.ENSP00000264711,9606.ENSP00000346508,9606.ENSP00000356438,9606.ENSP00000356954,9606.ENSP00000358596,9606.ENSP00000360025,9606.ENSP00000360266,9606.ENSP00000368683,9606.ENSP00000368727,9606.ENSP00000380247,9606.ENSP00000398736,9606.ENSP00000482657	PPP1R15A,XBP1,HBEGF,EREG,IRAK2,RAPGEF2,DNAJC27,PDGFA,PTGS2,CTGF,DUSP5,GADD45A,JUN,EDN1,XDH,HRH1,CYR61,MAP3K14
GO:0009416	response to light stimulus	8	290	0.52	0.0309	9606.ENSP00000234420,9606.ENSP00000239223,9606.ENSP00000252818,9606.ENSP00000256495,9606.ENSP00000270162,9606.ENSP00000303706,9606.ENSP00000356438,9606.ENSP00000380247	MSH6,DUSP1,JUND,BHLHE40,SIK1,CDC25A,PTGS2,HRH1
GO:1900744	regulation of p38MAPK cascade	3	34	1.02	0.0316	9606.ENSP00000355866,9606.ENSP00000360025,9606.ENSP00000368727	DUSP10,GADD45A,XDH
GO:0006048	UDP-N-acetylglucosamine biosynthetic process	2	9	1.43	0.032	9606.ENSP00000356903,9606.ENSP00000425809	UAP1,PGM3
GO:0031649	heat generation	2	9	1.43	0.032	9606.ENSP00000263339,9606.ENSP00000358301	IL1A,ADRB1
GO:0036500	ATF6-mediated unfolded protein response	2	9	1.43	0.032	9606.ENSP00000216037,9606.ENSP00000448665	XBP1,DDIT3
GO:0042355	L-fucose catabolic process	2	9	1.43	0.032	9606.ENSP00000312021,9606.ENSP00000351602	FUT1,FUT4
GO:0032965	regulation of collagen biosynthetic process	3	35	1.01	0.0333	9606.ENSP00000356696,9606.ENSP00000356954,9606.ENSP00000366702	SUCO,CTGF,ERRFI1
GO:0071407	cellular response to organic cyclic compound	11	505	0.42	0.0335	9606.ENSP00000264431,9606.ENSP00000305422,9606.ENSP00000307305,9606.ENSP00000344741,9606.ENSP00000356438,9606.ENSP00000360762,9606.ENSP00000366702,9606.ENSP00000368683,9606.ENSP00000380247,9606.ENSP00000420612,9606.ENSP00000482027	RAPGEF2,CEBPB,DDIT4,INSIG1,PTGS2,ANKRD1,ERRFI1,EDN1,HRH1,TIPARP,NR4A3
GO:0045595	regulation of cell differentiation	25	1695	0.25	0.0339	9606.ENSP00000216037,9606.ENSP00000244869,9606.ENSP00000252818,9606.ENSP00000261845,9606.ENSP00000264431,9606.ENSP00000270162,9606.ENSP00000305422,9606.ENSP00000326737,9606.ENSP00000333982,9606.ENSP00000344741,9606.ENSP00000345393,9606.ENSP00000349041,9606.ENSP00000355396,9606.ENSP00000355866,9606.ENSP00000356438,9606.ENSP00000356696,9606.ENSP00000356954,9606.ENSP00000360266,9606.ENSP00000360762,…	XBP1,EREG,JUND,MAPK6,RAPGEF2,SIK1,CEBPB,TNFRSF12A,NDEL1,INSIG1,MAFF,NRARP,LRIG2,DUSP10,PTGS2,SUCO,CTGF,JUN,ANKRD1,ERRFI1,EDN1,XDH,CYR61,DDIT3,NR4A3
GO:0046890	regulation of lipid biosynthetic process	6	174	0.62	0.0339	9606.ENSP00000216037,9606.ENSP00000270162,9606.ENSP00000344741,9606.ENSP00000346508,9606.ENSP00000356438,9606.ENSP00000398736	XBP1,SIK1,INSIG1,PDGFA,PTGS2,CYR61
GO:0050865	regulation of cell activation	11	506	0.42	0.0339	9606.ENSP00000216037,9606.ENSP00000234420,9606.ENSP00000305422,9606.ENSP00000346508,9606.ENSP00000349041,9606.ENSP00000355866,9606.ENSP00000356954,9606.ENSP00000365016,9606.ENSP00000418813,9606.ENSP00000481570,9606.ENSP00000482027	XBP1,MSH6,CEBPB,PDGFA,NRARP,DUSP10,CTGF,IRS2,SELK,TNFAIP3,NR4A3
GO:0032755	positive regulation of interleukin-6 production	4	74	0.81	0.0346	9606.ENSP00000216037,9606.ENSP00000244869,9606.ENSP00000263339,9606.ENSP00000418813	XBP1,EREG,IL1A,SELK
GO:0042594	response to starvation	6	175	0.61	0.0346	9606.ENSP00000216037,9606.ENSP00000253063,9606.ENSP00000307235,9606.ENSP00000344352,9606.ENSP00000360266,9606.ENSP00000448665	XBP1,SESN2,EIF2AK3,ATF3,JUN,DDIT3
GO:0006111	regulation of gluconeogenesis	3	36	1	0.035	9606.ENSP00000253063,9606.ENSP00000270162,9606.ENSP00000381282	SESN2,SIK1,VIMP
GO:0031668	cellular response to extracellular stimulus	7	235	0.55	0.035	9606.ENSP00000216037,9606.ENSP00000253063,9606.ENSP00000307235,9606.ENSP00000310170,9606.ENSP00000344352,9606.ENSP00000356438,9606.ENSP00000360266	XBP1,SESN2,EIF2AK3,FOSL1,ATF3,PTGS2,JUN
GO:0051443	positive regulation of ubiquitin-protein transferase activity	3	36	1	0.035	9606.ENSP00000265138,9606.ENSP00000268042,9606.ENSP00000417706	ARRDC3,ARRDC4,DCUN1D2
GO:0007519	skeletal muscle tissue development	5	122	0.69	0.0351	9606.ENSP00000242480,9606.ENSP00000344352,9606.ENSP00000345393,9606.ENSP00000360762,9606.ENSP00000368305	EGR2,ATF3,MAFF,ANKRD1,GPCPD1
GO:0043410	positive regulation of MAPK cascade	11	512	0.41	0.0359	9606.ENSP00000256458,9606.ENSP00000264431,9606.ENSP00000264711,9606.ENSP00000346508,9606.ENSP00000356954,9606.ENSP00000358596,9606.ENSP00000360025,9606.ENSP00000360266,9606.ENSP00000368683,9606.ENSP00000368727,9606.ENSP00000482657	IRAK2,RAPGEF2,DNAJC27,PDGFA,CTGF,DUSP5,GADD45A,JUN,EDN1,XDH,MAP3K14
GO:0061469	regulation of type B pancreatic cell proliferation	2	10	1.38	0.036	9606.ENSP00000366702,9606.ENSP00000482027	ERRFI1,NR4A3
GO:0071639	positive regulation of monocyte chemotactic protein-1 production	2	10	1.38	0.036	9606.ENSP00000263339,9606.ENSP00000418813	IL1A,SELK
GO:0008285	negative regulation of cell population proliferation	13	669	0.37	0.0369	9606.ENSP00000239223,9606.ENSP00000244869,9606.ENSP00000263339,9606.ENSP00000264431,9606.ENSP00000305422,9606.ENSP00000306512,9606.ENSP00000310170,9606.ENSP00000338807,9606.ENSP00000355866,9606.ENSP00000356438,9606.ENSP00000360266,9606.ENSP00000368727,9606.ENSP00000481570	DUSP1,EREG,IL1A,RAPGEF2,CEBPB,CXCL8,FOSL1,ZBTB49,DUSP10,PTGS2,JUN,XDH,TNFAIP3
GO:0042149	cellular response to glucose starvation	3	37	0.99	0.0369	9606.ENSP00000216037,9606.ENSP00000253063,9606.ENSP00000307235	XBP1,SESN2,EIF2AK3
GO:0045823	positive regulation of heart contraction	3	37	0.99	0.0369	9606.ENSP00000356954,9606.ENSP00000358301,9606.ENSP00000368683	CTGF,ADRB1,EDN1
GO:0045892	negative regulation of transcription, DNA-templated	19	1169	0.29	0.0369	9606.ENSP00000216037,9606.ENSP00000244869,9606.ENSP00000252818,9606.ENSP00000256495,9606.ENSP00000263062,9606.ENSP00000264444,9606.ENSP00000297689,9606.ENSP00000305422,9606.ENSP00000338290,9606.ENSP00000342924,9606.ENSP00000344352,9606.ENSP00000347755,9606.ENSP00000349041,9606.ENSP00000360266,9606.ENSP00000360762,9606.ENSP00000368683,9606.ENSP00000422037,9606.ENSP00000448665,9606.ENSP00000482027	XBP1,EREG,JUND,BHLHE40,EPC1,MXD1,NFIL3,CEBPB,GZF1,MCPH1,ATF3,ZNF140,NRARP,JUN,ANKRD1,EDN1,NFXL1,DDIT3,NR4A3
GO:1901342	regulation of vasculature development	8	305	0.5	0.0382	9606.ENSP00000216037,9606.ENSP00000263339,9606.ENSP00000264431,9606.ENSP00000306512,9606.ENSP00000326737,9606.ENSP00000356438,9606.ENSP00000368727,9606.ENSP00000481570	XBP1,IL1A,RAPGEF2,CXCL8,TNFRSF12A,PTGS2,XDH,TNFAIP3
GO:0071548	response to dexamethasone	3	38	0.98	0.039	9606.ENSP00000307305,9606.ENSP00000366702,9606.ENSP00000368683	DDIT4,ERRFI1,EDN1
GO:0051239	regulation of multicellular organismal process	36	2788	0.19	0.0391	9606.ENSP00000216037,9606.ENSP00000230990,9606.ENSP00000234420,9606.ENSP00000242480,9606.ENSP00000244869,9606.ENSP00000252818,9606.ENSP00000261845,9606.ENSP00000263339,9606.ENSP00000264431,9606.ENSP00000265138,9606.ENSP00000305422,9606.ENSP00000306512,9606.ENSP00000307235,9606.ENSP00000326737,9606.ENSP00000333982,9606.ENSP00000345393,9606.ENSP00000346508,9606.ENSP00000349041,9606.ENSP00000355396,…	XBP1,HBEGF,MSH6,EGR2,EREG,JUND,MAPK6,IL1A,RAPGEF2,ARRDC3,CEBPB,CXCL8,EIF2AK3,TNFRSF12A,NDEL1,MAFF,PDGFA,NRARP,LRIG2,DUSP10,PTGS2,SUCO,CTGF,ADRB1,JUN,ANKRD1,ERRFI1,EDN1,XDH,HRH1,VIMP,CYR61,SELK,DDIT3,TNFAIP3,NR4A3
GO:0071260	cellular response to mechanical stimulus	4	78	0.79	0.0394	9606.ENSP00000356438,9606.ENSP00000360025,9606.ENSP00000360762,9606.ENSP00000482657	PTGS2,GADD45A,ANKRD1,MAP3K14
GO:0045787	positive regulation of cell cycle	9	376	0.46	0.0397	9606.ENSP00000244869,9606.ENSP00000263339,9606.ENSP00000303706,9606.ENSP00000310170,9606.ENSP00000349547,9606.ENSP00000356954,9606.ENSP00000360025,9606.ENSP00000368683,9606.ENSP00000482027	EREG,IL1A,CDC25A,FOSL1,RASSF1,CTGF,GADD45A,EDN1,NR4A3
GO:0031953	negative regulation of protein autophosphorylation	2	11	1.34	0.041	9606.ENSP00000360266,9606.ENSP00000366702	JUN,ERRFI1
GO:0090110	COPII-coated vesicle cargo loading	2	11	1.34	0.041	9606.ENSP00000280551,9606.ENSP00000378721	SEC24D,SEC31A
GO:1903035	negative regulation of response to wounding	4	79	0.78	0.041	9606.ENSP00000346508,9606.ENSP00000355396,9606.ENSP00000355866,9606.ENSP00000368683	PDGFA,LRIG2,DUSP10,EDN1
GO:0051592	response to calcium ion	5	129	0.67	0.0417	9606.ENSP00000239223,9606.ENSP00000252818,9606.ENSP00000360266,9606.ENSP00000368683,9606.ENSP00000378721	DUSP1,JUND,JUN,EDN1,SEC31A
GO:0031214	biomineral tissue development	4	80	0.78	0.042	9606.ENSP00000272542,9606.ENSP00000307235,9606.ENSP00000356438,9606.ENSP00000357842	SLC20A1,EIF2AK3,PTGS2,TUFT1
GO:0010564	regulation of cell cycle process	13	684	0.36	0.0426	9606.ENSP00000239223,9606.ENSP00000244869,9606.ENSP00000263062,9606.ENSP00000263339,9606.ENSP00000303706,9606.ENSP00000306328,9606.ENSP00000342924,9606.ENSP00000348455,9606.ENSP00000349547,9606.ENSP00000356954,9606.ENSP00000360025,9606.ENSP00000363136,9606.ENSP00000368683	DUSP1,EREG,EPC1,IL1A,CDC25A,SLC25A33,MCPH1,UVRAG,RASSF1,CTGF,GADD45A,GPR3,EDN1
GO:0034641	cellular nitrogen compound metabolic process	58	5126	0.13	0.0428	9606.ENSP00000196489,9606.ENSP00000211936,9606.ENSP00000216037,9606.ENSP00000228437,9606.ENSP00000234420,9606.ENSP00000242480,9606.ENSP00000244869,9606.ENSP00000252818,9606.ENSP00000253063,9606.ENSP00000256495,9606.ENSP00000263062,9606.ENSP00000264444,9606.ENSP00000273153,9606.ENSP00000277746,9606.ENSP00000278590,9606.ENSP00000297157,9606.ENSP00000297578,9606.ENSP00000297689,9606.ENSP00000303696,…	ZNF416,ZNF184,XBP1,PRDM4,MSH6,EGR2,EREG,JUND,SESN2,BHLHE40,EPC1,MXD1,CSRNP1,NRBF2,ZC3H12C,RP9,SLC25A32,NFIL3,ZNF57,CEBPB,SLC25A33,FOSL1,NFKBIB,ZNF543,ZNF555,GZF1,ZBTB49,ZNF823,ATF3,MAFF,ZNF140,UVRAG,CREB5,ZSCAN12,PTGS2,UAP1,CTGF,PTBP2,GADD45A,JUN,YRDC,SLC25A25,ZBTB43,UGCG,TSPYL2,ZNF165,XDH,ZMYM5,ZNF527,JMJD6,NABP1,KLF6,NFXL1,THUMPD2,PGM3,DDIT3,ZNF699,NR4A3
GO:0061061	muscle structure development	10	457	0.42	0.0444	9606.ENSP00000216037,9606.ENSP00000230990,9606.ENSP00000242480,9606.ENSP00000263062,9606.ENSP00000270162,9606.ENSP00000344352,9606.ENSP00000345393,9606.ENSP00000360762,9606.ENSP00000368305,9606.ENSP00000433560	XBP1,HBEGF,EGR2,EPC1,SIK1,ATF3,MAFF,ANKRD1,GPCPD1,CRYAB
GO:0048511	rhythmic process	7	250	0.53	0.0447	9606.ENSP00000242480,9606.ENSP00000244869,9606.ENSP00000252818,9606.ENSP00000256495,9606.ENSP00000270162,9606.ENSP00000297689,9606.ENSP00000360266	EGR2,EREG,JUND,BHLHE40,SIK1,NFIL3,JUN
GO:0051094	positive regulation of developmental process	20	1286	0.27	0.0447	9606.ENSP00000216037,9606.ENSP00000234420,9606.ENSP00000252818,9606.ENSP00000261845,9606.ENSP00000263339,9606.ENSP00000264431,9606.ENSP00000305422,9606.ENSP00000306512,9606.ENSP00000326737,9606.ENSP00000333982,9606.ENSP00000346508,9606.ENSP00000355866,9606.ENSP00000356438,9606.ENSP00000356696,9606.ENSP00000356954,9606.ENSP00000360266,9606.ENSP00000360762,9606.ENSP00000368683,9606.ENSP00000398736,…	XBP1,MSH6,JUND,MAPK6,IL1A,RAPGEF2,CEBPB,CXCL8,TNFRSF12A,NDEL1,PDGFA,DUSP10,PTGS2,SUCO,CTGF,JUN,ANKRD1,EDN1,CYR61,TNFAIP3
GO:0031647	regulation of protein stability	7	251	0.52	0.0454	9606.ENSP00000216037,9606.ENSP00000258654,9606.ENSP00000349547,9606.ENSP00000371278,9606.ENSP00000427108,9606.ENSP00000433560,9606.ENSP00000441214	XBP1,COG3,RASSF1,CDC37L1,CDKN2AIP,CRYAB,USP36
GO:0009749	response to glucose	5	133	0.65	0.0461	9606.ENSP00000216037,9606.ENSP00000253063,9606.ENSP00000356954,9606.ENSP00000365016,9606.ENSP00000381282	XBP1,SESN2,CTGF,IRS2,VIMP
GO:0001934	positive regulation of protein phosphorylation	16	941	0.31	0.0462	9606.ENSP00000216037,9606.ENSP00000230990,9606.ENSP00000244869,9606.ENSP00000256458,9606.ENSP00000264431,9606.ENSP00000264711,9606.ENSP00000346508,9606.ENSP00000356438,9606.ENSP00000356954,9606.ENSP00000358596,9606.ENSP00000360025,9606.ENSP00000360266,9606.ENSP00000368683,9606.ENSP00000368727,9606.ENSP00000398736,9606.ENSP00000482657	XBP1,HBEGF,EREG,IRAK2,RAPGEF2,DNAJC27,PDGFA,PTGS2,CTGF,DUSP5,GADD45A,JUN,EDN1,XDH,CYR61,MAP3K14
GO:0050673	epithelial cell proliferation	4	83	0.76	0.0463	9606.ENSP00000216037,9606.ENSP00000244869,9606.ENSP00000305422,9606.ENSP00000349041	XBP1,EREG,CEBPB,NRARP
GO:0001817	regulation of cytokine production	12	615	0.37	0.0469	9606.ENSP00000216037,9606.ENSP00000244869,9606.ENSP00000263339,9606.ENSP00000305422,9606.ENSP00000307235,9606.ENSP00000356438,9606.ENSP00000366702,9606.ENSP00000381282,9606.ENSP00000418813,9606.ENSP00000448665,9606.ENSP00000481570,9606.ENSP00000482027	XBP1,EREG,IL1A,CEBPB,EIF2AK3,PTGS2,ERRFI1,VIMP,SELK,DDIT3,TNFAIP3,NR4A3
GO:0001819	positive regulation of cytokine production	9	390	0.44	0.0473	9606.ENSP00000216037,9606.ENSP00000244869,9606.ENSP00000263339,9606.ENSP00000305422,9606.ENSP00000307235,9606.ENSP00000356438,9606.ENSP00000418813,9606.ENSP00000448665,9606.ENSP00000482027	XBP1,EREG,IL1A,CEBPB,EIF2AK3,PTGS2,SELK,DDIT3,NR4A3
GO:0006469	negative regulation of protein kinase activity	7	254	0.52	0.0475	9606.ENSP00000239223,9606.ENSP00000355866,9606.ENSP00000358596,9606.ENSP00000360025,9606.ENSP00000366702,9606.ENSP00000473631,9606.ENSP00000481570	DUSP1,DUSP10,DUSP5,GADD45A,ERRFI1,DNAJC3,TNFAIP3
GO:0010827	regulation of glucose transmembrane transport	4	84	0.76	0.0477	9606.ENSP00000365016,9606.ENSP00000368683,9606.ENSP00000381282,9606.ENSP00000482027	IRS2,EDN1,VIMP,NR4A3
GO:0045834	positive regulation of lipid metabolic process	5	135	0.65	0.048	9606.ENSP00000216037,9606.ENSP00000356438,9606.ENSP00000365016,9606.ENSP00000398736,9606.ENSP00000482027	XBP1,PTGS2,IRS2,CYR61,NR4A3
GO:0007568	aging	7	255	0.52	0.0481	9606.ENSP00000234420,9606.ENSP00000252818,9606.ENSP00000356438,9606.ENSP00000356954,9606.ENSP00000360266,9606.ENSP00000368683,9606.ENSP00000433560	MSH6,JUND,PTGS2,CTGF,JUN,EDN1,CRYAB
GO:0009887	animal organ morphogenesis	15	865	0.32	0.0492	9606.ENSP00000244869,9606.ENSP00000273153,9606.ENSP00000305422,9606.ENSP00000338290,9606.ENSP00000344741,9606.ENSP00000346508,9606.ENSP00000356954,9606.ENSP00000357842,9606.ENSP00000360266,9606.ENSP00000360762,9606.ENSP00000366702,9606.ENSP00000368683,9606.ENSP00000398736,9606.ENSP00000420612,9606.ENSP00000482027	EREG,CSRNP1,CEBPB,GZF1,INSIG1,PDGFA,CTGF,TUFT1,JUN,ANKRD1,ERRFI1,EDN1,CYR61,TIPARP,NR4A3
GO:1901216	positive regulation of neuron death	4	85	0.75	0.0492	9606.ENSP00000307305,9606.ENSP00000358022,9606.ENSP00000360266,9606.ENSP00000448665	DDIT4,MCL1,JUN,DDIT3
GO:2000106	regulation of leukocyte apoptotic process	4	85	0.75	0.0492	9606.ENSP00000264431,9606.ENSP00000365016,9606.ENSP00000381282,9606.ENSP00000482027	RAPGEF2,IRS2,VIMP,NR4A3
GO:0006470	protein dephosphorylation	6	194	0.57	0.0493	9606.ENSP00000200453,9606.ENSP00000239223,9606.ENSP00000303706,9606.ENSP00000355866,9606.ENSP00000358596,9606.ENSP00000379503	PPP1R15A,DUSP1,CDC25A,DUSP10,DUSP5,PDP1
GO:0030282	bone mineralization	3	43	0.92	0.0495	9606.ENSP00000307235,9606.ENSP00000356438,9606.ENSP00000357842	EIF2AK3,PTGS2,TUFT1
GO:0031952	regulation of protein autophosphorylation	3	43	0.92	0.0495	9606.ENSP00000346508,9606.ENSP00000360266,9606.ENSP00000366702	PDGFA,JUN,ERRFI1
GO:0048545	response to steroid hormone	8	324	0.47	0.0495	9606.ENSP00000239223,9606.ENSP00000307305,9606.ENSP00000310170,9606.ENSP00000356438,9606.ENSP00000356954,9606.ENSP00000366702,9606.ENSP00000368683,9606.ENSP00000482027	DUSP1,DDIT4,FOSL1,PTGS2,CTGF,ERRFI1,EDN1,NR4A3
GO:0009267	cellular response to starvation	5	137	0.64	0.0498	9606.ENSP00000216037,9606.ENSP00000253063,9606.ENSP00000307235,9606.ENSP00000344352,9606.ENSP00000360266	XBP1,SESN2,EIF2AK3,ATF3,JUN

## Sheet: Par_vs_Coinfection_24_Down_Bio
Supplementary table S10: Results from the Gene Ontology (GO) analysis in the category for biological process complete (GObp) and Pathway Enrichment (KEGG pathways) from single infections compared to co-infected cells at both 24 and 72 hpi.
#term ID	term description	observed gene count	background gene count	strength	false discovery rate	matching proteins in your network (IDs)	matching proteins in your network (labels)
GO:0006119	oxidative phosphorylation	19	100	0.97	9.41e-09	9606.ENSP00000215375,9606.ENSP00000215565,9606.ENSP00000233627,9606.ENSP00000301457,9606.ENSP00000306003,9606.ENSP00000322450,9606.ENSP00000332887,9606.ENSP00000354499,9606.ENSP00000354554,9606.ENSP00000354632,9606.ENSP00000354687,9606.ENSP00000354728,9606.ENSP00000354813,9606.ENSP00000354876,9606.ENSP00000354961,9606.ENSP00000355046,9606.ENSP00000355206,9606.ENSP00000355265,9606.ENSP00000369176	ATP5D,NDUFB7,NDUFS7,NDUFA7,ATP5I,NDUFV1,UQCR10,MT-CO1,MT-CYB,MT-ATP6,MT-ND1,MT-ND4L,MT-ND5,MT-CO2,MT-ND4,MT-ND2,MT-ND3,MT-ATP8,NDUFB6
GO:0022904	respiratory electron transport chain	17	96	0.94	1.82e-07	9606.ENSP00000215565,9606.ENSP00000233627,9606.ENSP00000301457,9606.ENSP00000315351,9606.ENSP00000322450,9606.ENSP00000332887,9606.ENSP00000354499,9606.ENSP00000354554,9606.ENSP00000354687,9606.ENSP00000354728,9606.ENSP00000354813,9606.ENSP00000354876,9606.ENSP00000354961,9606.ENSP00000354982,9606.ENSP00000355046,9606.ENSP00000355206,9606.ENSP00000369176	NDUFB7,NDUFS7,NDUFA7,D2HGDH,NDUFV1,UQCR10,MT-CO1,MT-CYB,MT-ND1,MT-ND4L,MT-ND5,MT-CO2,MT-ND4,MT-CO3,MT-ND2,MT-ND3,NDUFB6
GO:0045333	cellular respiration	20	153	0.81	3.49e-07	9606.ENSP00000215565,9606.ENSP00000233627,9606.ENSP00000301457,9606.ENSP00000315351,9606.ENSP00000322450,9606.ENSP00000325655,9606.ENSP00000327070,9606.ENSP00000332887,9606.ENSP00000354499,9606.ENSP00000354554,9606.ENSP00000354687,9606.ENSP00000354728,9606.ENSP00000354813,9606.ENSP00000354876,9606.ENSP00000354961,9606.ENSP00000354982,9606.ENSP00000355046,9606.ENSP00000355206,9606.ENSP00000369176,…	NDUFB7,NDUFS7,NDUFA7,D2HGDH,NDUFV1,CHCHD5,MDH2,UQCR10,MT-CO1,MT-CYB,MT-ND1,MT-ND4L,MT-ND5,MT-CO2,MT-ND4,MT-CO3,MT-ND2,MT-ND3,NDUFB6,NFATC4
GO:0042775	mitochondrial ATP synthesis coupled electron transport	15	78	0.98	4.32e-07	9606.ENSP00000215565,9606.ENSP00000233627,9606.ENSP00000301457,9606.ENSP00000322450,9606.ENSP00000332887,9606.ENSP00000354499,9606.ENSP00000354554,9606.ENSP00000354687,9606.ENSP00000354728,9606.ENSP00000354813,9606.ENSP00000354876,9606.ENSP00000354961,9606.ENSP00000355046,9606.ENSP00000355206,9606.ENSP00000369176	NDUFB7,NDUFS7,NDUFA7,NDUFV1,UQCR10,MT-CO1,MT-CYB,MT-ND1,MT-ND4L,MT-ND5,MT-CO2,MT-ND4,MT-ND2,MT-ND3,NDUFB6
GO:0033108	mitochondrial respiratory chain complex assembly	16	98	0.91	6.3e-07	9606.ENSP00000215565,9606.ENSP00000233627,9606.ENSP00000261070,9606.ENSP00000301457,9606.ENSP00000322450,9606.ENSP00000332887,9606.ENSP00000354665,9606.ENSP00000354687,9606.ENSP00000354813,9606.ENSP00000354961,9606.ENSP00000355046,9606.ENSP00000355206,9606.ENSP00000369176,9606.ENSP00000389160,9606.ENSP00000423673,9606.ENSP00000444433	NDUFB7,NDUFS7,COX17,NDUFA7,NDUFV1,UQCR10,MT-ND6,MT-ND1,MT-ND5,MT-ND4,MT-ND2,MT-ND3,NDUFB6,NDUFA11,NDUFA13,SCO2
GO:0006091	generation of precursor metabolites and energy	30	400	0.57	1.57e-06	9606.ENSP00000215375,9606.ENSP00000215565,9606.ENSP00000233627,9606.ENSP00000261070,9606.ENSP00000261623,9606.ENSP00000263093,9606.ENSP00000269848,9606.ENSP00000301457,9606.ENSP00000305692,9606.ENSP00000306003,9606.ENSP00000315351,9606.ENSP00000322450,9606.ENSP00000325655,9606.ENSP00000327070,9606.ENSP00000332887,9606.ENSP00000354499,9606.ENSP00000354554,9606.ENSP00000354632,9606.ENSP00000354687,…	ATP5D,NDUFB7,NDUFS7,COX17,CYBA,SLC27A5,PFKL,NDUFA7,GAA,ATP5I,D2HGDH,NDUFV1,CHCHD5,MDH2,UQCR10,MT-CO1,MT-CYB,MT-ATP6,MT-ND1,MT-ND4L,MT-ND5,MT-CO2,MT-ND4,MT-CO3,MT-ND2,MT-ND3,MT-ATP8,NDUFB6,NFATC4,UQCR11
GO:0032981	mitochondrial respiratory chain complex I assembly	13	65	1	2.12e-06	9606.ENSP00000215565,9606.ENSP00000233627,9606.ENSP00000301457,9606.ENSP00000322450,9606.ENSP00000354665,9606.ENSP00000354687,9606.ENSP00000354813,9606.ENSP00000354961,9606.ENSP00000355046,9606.ENSP00000355206,9606.ENSP00000369176,9606.ENSP00000389160,9606.ENSP00000423673	NDUFB7,NDUFS7,NDUFA7,NDUFV1,MT-ND6,MT-ND1,MT-ND5,MT-ND4,MT-ND2,MT-ND3,NDUFB6,NDUFA11,NDUFA13
GO:0006120	mitochondrial electron transport, NADH to ubiquinone	11	44	1.09	2.85e-06	9606.ENSP00000215565,9606.ENSP00000233627,9606.ENSP00000301457,9606.ENSP00000322450,9606.ENSP00000354687,9606.ENSP00000354728,9606.ENSP00000354813,9606.ENSP00000354961,9606.ENSP00000355046,9606.ENSP00000355206,9606.ENSP00000369176	NDUFB7,NDUFS7,NDUFA7,NDUFV1,MT-ND1,MT-ND4L,MT-ND5,MT-ND4,MT-ND2,MT-ND3,NDUFB6
GO:0009167	purine ribonucleoside monophosphate metabolic process	22	230	0.68	2.85e-06	9606.ENSP00000215375,9606.ENSP00000215565,9606.ENSP00000233627,9606.ENSP00000269848,9606.ENSP00000301457,9606.ENSP00000306003,9606.ENSP00000322450,9606.ENSP00000332887,9606.ENSP00000349486,9606.ENSP00000354499,9606.ENSP00000354554,9606.ENSP00000354632,9606.ENSP00000354687,9606.ENSP00000354728,9606.ENSP00000354813,9606.ENSP00000354876,9606.ENSP00000354961,9606.ENSP00000355046,9606.ENSP00000355206,…	ATP5D,NDUFB7,NDUFS7,PFKL,NDUFA7,ATP5I,NDUFV1,UQCR10,SCRIB,MT-CO1,MT-CYB,MT-ATP6,MT-ND1,MT-ND4L,MT-ND5,MT-CO2,MT-ND4,MT-ND2,MT-ND3,MT-ATP8,APRT,NDUFB6
GO:0022900	electron transport chain	19	169	0.75	2.85e-06	9606.ENSP00000215565,9606.ENSP00000233627,9606.ENSP00000261623,9606.ENSP00000301457,9606.ENSP00000315351,9606.ENSP00000322450,9606.ENSP00000332887,9606.ENSP00000354499,9606.ENSP00000354554,9606.ENSP00000354687,9606.ENSP00000354728,9606.ENSP00000354813,9606.ENSP00000354876,9606.ENSP00000354961,9606.ENSP00000354982,9606.ENSP00000355046,9606.ENSP00000355206,9606.ENSP00000369176,9606.ENSP00000467262	NDUFB7,NDUFS7,CYBA,NDUFA7,D2HGDH,NDUFV1,UQCR10,MT-CO1,MT-CYB,MT-ND1,MT-ND4L,MT-ND5,MT-CO2,MT-ND4,MT-CO3,MT-ND2,MT-ND3,NDUFB6,UQCR11
GO:0046034	ATP metabolic process	20	190	0.72	2.85e-06	9606.ENSP00000215375,9606.ENSP00000215565,9606.ENSP00000233627,9606.ENSP00000269848,9606.ENSP00000301457,9606.ENSP00000306003,9606.ENSP00000322450,9606.ENSP00000332887,9606.ENSP00000354499,9606.ENSP00000354554,9606.ENSP00000354632,9606.ENSP00000354687,9606.ENSP00000354728,9606.ENSP00000354813,9606.ENSP00000354876,9606.ENSP00000354961,9606.ENSP00000355046,9606.ENSP00000355206,9606.ENSP00000355265,…	ATP5D,NDUFB7,NDUFS7,PFKL,NDUFA7,ATP5I,NDUFV1,UQCR10,MT-CO1,MT-CYB,MT-ATP6,MT-ND1,MT-ND4L,MT-ND5,MT-CO2,MT-ND4,MT-ND2,MT-ND3,MT-ATP8,NDUFB6
GO:0015980	energy derivation by oxidation of organic compounds	21	217	0.68	3.49e-06	9606.ENSP00000215565,9606.ENSP00000233627,9606.ENSP00000301457,9606.ENSP00000305692,9606.ENSP00000315351,9606.ENSP00000322450,9606.ENSP00000325655,9606.ENSP00000327070,9606.ENSP00000332887,9606.ENSP00000354499,9606.ENSP00000354554,9606.ENSP00000354687,9606.ENSP00000354728,9606.ENSP00000354813,9606.ENSP00000354876,9606.ENSP00000354961,9606.ENSP00000354982,9606.ENSP00000355046,9606.ENSP00000355206,…	NDUFB7,NDUFS7,NDUFA7,GAA,D2HGDH,NDUFV1,CHCHD5,MDH2,UQCR10,MT-CO1,MT-CYB,MT-ND1,MT-ND4L,MT-ND5,MT-CO2,MT-ND4,MT-CO3,MT-ND2,MT-ND3,NDUFB6,NFATC4
GO:0017144	drug metabolic process	37	622	0.47	3.49e-06	9606.ENSP00000215375,9606.ENSP00000215565,9606.ENSP00000216465,9606.ENSP00000233627,9606.ENSP00000255389,9606.ENSP00000260447,9606.ENSP00000261623,9606.ENSP00000263093,9606.ENSP00000269848,9606.ENSP00000273588,9606.ENSP00000301457,9606.ENSP00000301522,9606.ENSP00000306003,9606.ENSP00000322450,9606.ENSP00000327070,9606.ENSP00000332887,9606.ENSP00000333667,9606.ENSP00000354499,9606.ENSP00000354511,…	ATP5D,NDUFB7,GSTZ1,NDUFS7,PEMT,GCHFR,CYBA,SLC27A5,PFKL,AMT,NDUFA7,PRDX2,ATP5I,NDUFV1,MDH2,UQCR10,SHMT2,MT-CO1,COMT,MT-CYB,MT-ATP6,MT-ND1,MT-ND4L,MT-ND5,MT-CO2,MT-ND4,MT-ND2,MT-ND3,MT-ATP8,APRT,NDUFB6,GGT6,DPEP1,SDSL,AMDHD2,GPX1,CYP4F12
GO:0009144	purine nucleoside triphosphate metabolic process	21	228	0.66	6.41e-06	9606.ENSP00000215375,9606.ENSP00000215565,9606.ENSP00000233627,9606.ENSP00000269848,9606.ENSP00000301457,9606.ENSP00000306003,9606.ENSP00000322450,9606.ENSP00000332887,9606.ENSP00000354499,9606.ENSP00000354554,9606.ENSP00000354632,9606.ENSP00000354687,9606.ENSP00000354728,9606.ENSP00000354813,9606.ENSP00000354876,9606.ENSP00000354961,9606.ENSP00000355046,9606.ENSP00000355206,9606.ENSP00000355265,…	ATP5D,NDUFB7,NDUFS7,PFKL,NDUFA7,ATP5I,NDUFV1,UQCR10,MT-CO1,MT-CYB,MT-ATP6,MT-ND1,MT-ND4L,MT-ND5,MT-CO2,MT-ND4,MT-ND2,MT-ND3,MT-ATP8,NDUFB6,NUDT1
GO:0071294	cellular response to zinc ion	8	19	1.32	7.73e-06	9606.ENSP00000245185,9606.ENSP00000307706,9606.ENSP00000334872,9606.ENSP00000369146,9606.ENSP00000377995,9606.ENSP00000379563,9606.ENSP00000391397,9606.ENSP00000478425	MT2A,MT1E,MT1F,MT1M,MT1X,TSPO,MT1G,MT1A
GO:0010043	response to zinc ion	11	52	1.02	8.14e-06	9606.ENSP00000245185,9606.ENSP00000307706,9606.ENSP00000315351,9606.ENSP00000332449,9606.ENSP00000334872,9606.ENSP00000354689,9606.ENSP00000369146,9606.ENSP00000377995,9606.ENSP00000379563,9606.ENSP00000391397,9606.ENSP00000478425	MT2A,MT1E,D2HGDH,CRIP1,MT1F,SLC39A13,MT1M,MT1X,TSPO,MT1G,MT1A
GO:0055114	oxidation-reduction process	46	932	0.39	9.76e-06	9606.ENSP00000215565,9606.ENSP00000216465,9606.ENSP00000233627,9606.ENSP00000241337,9606.ENSP00000242592,9606.ENSP00000261623,9606.ENSP00000269848,9606.ENSP00000301457,9606.ENSP00000301522,9606.ENSP00000304592,9606.ENSP00000305692,9606.ENSP00000311977,9606.ENSP00000315351,9606.ENSP00000322450,9606.ENSP00000325655,9606.ENSP00000327070,9606.ENSP00000332887,9606.ENSP00000335060,9606.ENSP00000354499,…	NDUFB7,GSTZ1,NDUFS7,GSTM2,ACADS,CYBA,PFKL,NDUFA7,PRDX2,FASN,GAA,DUS3L,D2HGDH,NDUFV1,CHCHD5,MDH2,UQCR10,HPDL,MT-CO1,MT-CYB,MT-ND6,MT-ND1,MT-ND4L,MT-ND5,MT-CO2,MT-ND4,MT-CO3,MT-ND2,MSRB1,MT-ND3,NDOR1,ECHDC2,SARDH,NDUFB6,GSTP1,AIFM3,NFATC4,NDUFA11,GPX1,AOC1,NDUFA13,CCS,SCO2,SLC25A10,CYP4F12,UQCR11
GO:0009205	purine ribonucleoside triphosphate metabolic process	20	221	0.65	1.41e-05	9606.ENSP00000215375,9606.ENSP00000215565,9606.ENSP00000233627,9606.ENSP00000269848,9606.ENSP00000301457,9606.ENSP00000306003,9606.ENSP00000322450,9606.ENSP00000332887,9606.ENSP00000354499,9606.ENSP00000354554,9606.ENSP00000354632,9606.ENSP00000354687,9606.ENSP00000354728,9606.ENSP00000354813,9606.ENSP00000354876,9606.ENSP00000354961,9606.ENSP00000355046,9606.ENSP00000355206,9606.ENSP00000355265,…	ATP5D,NDUFB7,NDUFS7,PFKL,NDUFA7,ATP5I,NDUFV1,UQCR10,MT-CO1,MT-CYB,MT-ATP6,MT-ND1,MT-ND4L,MT-ND5,MT-CO2,MT-ND4,MT-ND2,MT-ND3,MT-ATP8,NDUFB6
GO:0044281	small molecule metabolic process	67	1779	0.27	0.00013	9606.ENSP00000007414,9606.ENSP00000215375,9606.ENSP00000215565,9606.ENSP00000215754,9606.ENSP00000216465,9606.ENSP00000233627,9606.ENSP00000241337,9606.ENSP00000242592,9606.ENSP00000243167,9606.ENSP00000252486,9606.ENSP00000255389,9606.ENSP00000263093,9606.ENSP00000263650,9606.ENSP00000265471,9606.ENSP00000269848,9606.ENSP00000273588,9606.ENSP00000294304,9606.ENSP00000301457,9606.ENSP00000304592,…	OSBPL7,ATP5D,NDUFB7,MIF,GSTZ1,NDUFS7,GSTM2,ACADS,FAAH,APOE,PEMT,SLC27A5,OSBPL5,B3GAT3,PFKL,AMT,LRP5,NDUFA7,FASN,GAA,ATP5I,D2HGDH,NDUFV1,PARP10,NADSYN1,MDH2,UQCR10,INPP5J,SHMT2,BSG,HPDL,ISYNA1,APOD,KCNJ11,SCRIB,MT-CO1,MT-CYB,MT-ATP6,MT-ND1,MT-ND4L,MT-ND5,MT-CO2,MT-ND4,MT-ND2,MT-ND3,MT-ATP8,TARS2,ECHDC2,SARDH,LPIN3,LYPLA2,APRT,NDUFB6,GGT6,DPEP1,NUDT1,GSTP1,SDSL,TST,AMDHD2,NAPRT,ACSF2,GPX1,SLC25A10,…
GO:0010035	response to inorganic substance	28	491	0.45	0.00028	9606.ENSP00000013807,9606.ENSP00000215375,9606.ENSP00000217182,9606.ENSP00000245185,9606.ENSP00000291527,9606.ENSP00000301522,9606.ENSP00000307706,9606.ENSP00000315351,9606.ENSP00000332449,9606.ENSP00000333769,9606.ENSP00000334872,9606.ENSP00000354499,9606.ENSP00000354554,9606.ENSP00000354665,9606.ENSP00000354689,9606.ENSP00000354813,9606.ENSP00000369146,9606.ENSP00000376807,9606.ENSP00000377995,…	ERCC1,ATP5D,EEF1A2,MT2A,TFF1,PRDX2,MT1E,D2HGDH,CRIP1,BSG,MT1F,MT-CO1,MT-CYB,MT-ND6,SLC39A13,MT-ND5,MT1M,DPEP1,MT1X,TSPO,NUDT1,MB,NFATC4,MT1G,GPX1,AOC1,CCS,MT1A
GO:0006163	purine nucleotide metabolic process	26	442	0.46	0.00037	9606.ENSP00000215375,9606.ENSP00000215565,9606.ENSP00000233627,9606.ENSP00000269848,9606.ENSP00000301457,9606.ENSP00000304592,9606.ENSP00000306003,9606.ENSP00000322450,9606.ENSP00000332887,9606.ENSP00000349486,9606.ENSP00000354499,9606.ENSP00000354554,9606.ENSP00000354632,9606.ENSP00000354687,9606.ENSP00000354728,9606.ENSP00000354813,9606.ENSP00000354876,9606.ENSP00000354961,9606.ENSP00000355046,…	ATP5D,NDUFB7,NDUFS7,PFKL,NDUFA7,FASN,ATP5I,NDUFV1,UQCR10,SCRIB,MT-CO1,MT-CYB,MT-ATP6,MT-ND1,MT-ND4L,MT-ND5,MT-CO2,MT-ND4,MT-ND2,MT-ND3,MT-ATP8,APRT,NDUFB6,NUDT1,ACSF2,GPX1
GO:0072521	purine-containing compound metabolic process	27	478	0.45	0.00047	9606.ENSP00000215375,9606.ENSP00000215565,9606.ENSP00000233627,9606.ENSP00000255389,9606.ENSP00000269848,9606.ENSP00000301457,9606.ENSP00000304592,9606.ENSP00000306003,9606.ENSP00000322450,9606.ENSP00000332887,9606.ENSP00000349486,9606.ENSP00000354499,9606.ENSP00000354554,9606.ENSP00000354632,9606.ENSP00000354687,9606.ENSP00000354728,9606.ENSP00000354813,9606.ENSP00000354876,9606.ENSP00000354961,…	ATP5D,NDUFB7,NDUFS7,PEMT,PFKL,NDUFA7,FASN,ATP5I,NDUFV1,UQCR10,SCRIB,MT-CO1,MT-CYB,MT-ATP6,MT-ND1,MT-ND4L,MT-ND5,MT-CO2,MT-ND4,MT-ND2,MT-ND3,MT-ATP8,APRT,NDUFB6,NUDT1,ACSF2,GPX1
GO:0009117	nucleotide metabolic process	30	576	0.41	0.00061	9606.ENSP00000215375,9606.ENSP00000215565,9606.ENSP00000233627,9606.ENSP00000269848,9606.ENSP00000301457,9606.ENSP00000304592,9606.ENSP00000306003,9606.ENSP00000322450,9606.ENSP00000325618,9606.ENSP00000326424,9606.ENSP00000327070,9606.ENSP00000332887,9606.ENSP00000349486,9606.ENSP00000354499,9606.ENSP00000354554,9606.ENSP00000354632,9606.ENSP00000354687,9606.ENSP00000354728,9606.ENSP00000354813,…	ATP5D,NDUFB7,NDUFS7,PFKL,NDUFA7,FASN,ATP5I,NDUFV1,PARP10,NADSYN1,MDH2,UQCR10,SCRIB,MT-CO1,MT-CYB,MT-ATP6,MT-ND1,MT-ND4L,MT-ND5,MT-CO2,MT-ND4,MT-ND2,MT-ND3,MT-ATP8,APRT,NDUFB6,NUDT1,NAPRT,ACSF2,GPX1
GO:0055086	nucleobase-containing small molecule metabolic process	32	662	0.38	0.0012	9606.ENSP00000215375,9606.ENSP00000215565,9606.ENSP00000233627,9606.ENSP00000255389,9606.ENSP00000269848,9606.ENSP00000301457,9606.ENSP00000304592,9606.ENSP00000306003,9606.ENSP00000322450,9606.ENSP00000325618,9606.ENSP00000326424,9606.ENSP00000327070,9606.ENSP00000332887,9606.ENSP00000349486,9606.ENSP00000354499,9606.ENSP00000354554,9606.ENSP00000354632,9606.ENSP00000354687,9606.ENSP00000354728,…	ATP5D,NDUFB7,NDUFS7,PEMT,PFKL,NDUFA7,FASN,ATP5I,NDUFV1,PARP10,NADSYN1,MDH2,UQCR10,SCRIB,MT-CO1,MT-CYB,MT-ATP6,MT-ND1,MT-ND4L,MT-ND5,MT-CO2,MT-ND4,MT-ND2,MT-ND3,MT-ATP8,APRT,NDUFB6,NUDT1,AMDHD2,NAPRT,ACSF2,GPX1
GO:0007005	mitochondrion organization	24	424	0.45	0.0014	9606.ENSP00000215375,9606.ENSP00000215565,9606.ENSP00000233627,9606.ENSP00000261070,9606.ENSP00000301457,9606.ENSP00000306003,9606.ENSP00000322450,9606.ENSP00000328174,9606.ENSP00000329213,9606.ENSP00000332887,9606.ENSP00000340989,9606.ENSP00000354632,9606.ENSP00000354665,9606.ENSP00000354687,9606.ENSP00000354813,9606.ENSP00000354961,9606.ENSP00000355046,9606.ENSP00000355206,9606.ENSP00000355265,…	ATP5D,NDUFB7,NDUFS7,COX17,NDUFA7,ATP5I,NDUFV1,PIF1,SIVA1,UQCR10,SFN,MT-ATP6,MT-ND6,MT-ND1,MT-ND5,MT-ND4,MT-ND2,MT-ND3,MT-ATP8,NDUFB6,TSPO,NDUFA11,NDUFA13,SCO2
GO:0009150	purine ribonucleotide metabolic process	24	425	0.45	0.0014	9606.ENSP00000215375,9606.ENSP00000215565,9606.ENSP00000233627,9606.ENSP00000269848,9606.ENSP00000301457,9606.ENSP00000304592,9606.ENSP00000306003,9606.ENSP00000322450,9606.ENSP00000332887,9606.ENSP00000349486,9606.ENSP00000354499,9606.ENSP00000354554,9606.ENSP00000354632,9606.ENSP00000354687,9606.ENSP00000354728,9606.ENSP00000354813,9606.ENSP00000354876,9606.ENSP00000354961,9606.ENSP00000355046,…	ATP5D,NDUFB7,NDUFS7,PFKL,NDUFA7,FASN,ATP5I,NDUFV1,UQCR10,SCRIB,MT-CO1,MT-CYB,MT-ATP6,MT-ND1,MT-ND4L,MT-ND5,MT-CO2,MT-ND4,MT-ND2,MT-ND3,MT-ATP8,APRT,NDUFB6,ACSF2
GO:0010038	response to metal ion	21	339	0.49	0.0014	9606.ENSP00000013807,9606.ENSP00000215375,9606.ENSP00000245185,9606.ENSP00000291527,9606.ENSP00000307706,9606.ENSP00000315351,9606.ENSP00000332449,9606.ENSP00000333769,9606.ENSP00000334872,9606.ENSP00000354499,9606.ENSP00000354554,9606.ENSP00000354689,9606.ENSP00000369146,9606.ENSP00000376807,9606.ENSP00000377995,9606.ENSP00000379563,9606.ENSP00000380241,9606.ENSP00000388910,9606.ENSP00000391397,…	ERCC1,ATP5D,MT2A,TFF1,MT1E,D2HGDH,CRIP1,BSG,MT1F,MT-CO1,MT-CYB,SLC39A13,MT1M,DPEP1,MT1X,TSPO,NUDT1,NFATC4,MT1G,AOC1,MT1A
GO:1901564	organonitrogen compound metabolic process	144	5281	0.13	0.0033	9606.ENSP00000026218,9606.ENSP00000215375,9606.ENSP00000215565,9606.ENSP00000215659,9606.ENSP00000216271,9606.ENSP00000216465,9606.ENSP00000217182,9606.ENSP00000218388,9606.ENSP00000220003,9606.ENSP00000220616,9606.ENSP00000225538,9606.ENSP00000232744,9606.ENSP00000233331,9606.ENSP00000233627,9606.ENSP00000236671,9606.ENSP00000241337,9606.ENSP00000247665,9606.ENSP00000247970,9606.ENSP00000250974,…	PIGQ,ATP5D,NDUFB7,MAPK12,HDAC10,GSTZ1,EEF1A2,TIMP1,CSK,TG,P2RX1,ABTB1,INO80B,NDUFS7,CTSD,GSTM2,PHPT1,PIN1,ABHD17A,APOE,EIF3G,PEMT,BTBD2,SUV420H2,PKD1,SPTBN4,OSBPL5,HSF4,B3GAT3,MFGE8,PFKL,CBLC,AMT,DGKQ,SCRN2,FASTK,CDC42EP5,NDUFA7,FASN,ATP5I,LTBP4,FBXW5,ANAPC2,D2HGDH,CCDC101,PSAPL1,PRSS8,RPLP2,NDUFV1,GADD45GIP1,ULK1,PARP10,NADSYN1,MDH2,SIRT7,MRPL54,UQCR10,UBA7,RAB11B,SHMT2,MAPK11,HPDL,SIRT6,ZDHHC1,…
GO:0046686	response to cadmium ion	8	56	0.85	0.004	9606.ENSP00000013807,9606.ENSP00000307706,9606.ENSP00000334872,9606.ENSP00000354554,9606.ENSP00000377995,9606.ENSP00000380241,9606.ENSP00000391397,9606.ENSP00000478425	ERCC1,MT1E,MT1F,MT-CYB,MT1X,NUDT1,MT1G,MT1A
GO:0072657	protein localization to membrane	22	405	0.43	0.0049	9606.ENSP00000250974,9606.ENSP00000252486,9606.ENSP00000263373,9606.ENSP00000296849,9606.ENSP00000313752,9606.ENSP00000322419,9606.ENSP00000331678,9606.ENSP00000333547,9606.ENSP00000333769,9606.ENSP00000341911,9606.ENSP00000345957,9606.ENSP00000346037,9606.ENSP00000346067,9606.ENSP00000349486,9606.ENSP00000354739,9606.ENSP00000361076,9606.ENSP00000368169,9606.ENSP00000423673,9606.ENSP00000429374,…	ABHD17A,APOE,SPTBN4,NKD2,SSNA1,RPLP2,PKP3,RAB11B,BSG,PALM,RPS21,RPLP1,RPSA,SCRIB,RPL12,RPL7A,DVL1,NDUFA13,RPS20,FAU,ASNA1,RPS5
GO:0034622	cellular protein-containing complex assembly	35	832	0.32	0.0057	9606.ENSP00000215565,9606.ENSP00000215980,9606.ENSP00000233627,9606.ENSP00000261070,9606.ENSP00000261623,9606.ENSP00000273814,9606.ENSP00000290079,9606.ENSP00000297508,9606.ENSP00000301457,9606.ENSP00000322450,9606.ENSP00000329662,9606.ENSP00000332887,9606.ENSP00000346067,9606.ENSP00000349430,9606.ENSP00000354665,9606.ENSP00000354687,9606.ENSP00000354739,9606.ENSP00000354813,9606.ENSP00000354961,…	NDUFB7,CENPM,NDUFS7,COX17,CYBA,DGKQ,TMEM141,MICALL2,NDUFA7,NDUFV1,H1FX,UQCR10,RPSA,HIST1H2BK,MT-ND6,MT-ND1,RPL12,MT-ND5,MT-ND4,MT-CO3,MT-ND2,MSRB1,MT-ND3,H3F3A,HIST1H2BL,NDUFB6,STRA13,VAMP1,NDUFA11,PILRB,NDUFA13,SCO2,TAF1C,RPS5,HIST1H4A
GO:0019637	organophosphate metabolic process	40	1011	0.29	0.006	9606.ENSP00000026218,9606.ENSP00000215375,9606.ENSP00000215565,9606.ENSP00000233627,9606.ENSP00000255389,9606.ENSP00000263650,9606.ENSP00000269848,9606.ENSP00000273814,9606.ENSP00000301457,9606.ENSP00000304592,9606.ENSP00000306003,9606.ENSP00000322450,9606.ENSP00000325618,9606.ENSP00000326424,9606.ENSP00000327070,9606.ENSP00000332887,9606.ENSP00000333262,9606.ENSP00000337746,9606.ENSP00000347206,…	PIGQ,ATP5D,NDUFB7,NDUFS7,PEMT,OSBPL5,PFKL,DGKQ,NDUFA7,FASN,ATP5I,NDUFV1,PARP10,NADSYN1,MDH2,UQCR10,INPP5J,ISYNA1,GPAA1,SCRIB,MT-CO1,MT-CYB,MT-ATP6,MT-ND1,MT-ND4L,MT-ND5,MT-CO2,MT-ND4,MT-ND2,MT-ND3,MT-ATP8,DPM3,LPIN3,APRT,NDUFB6,SBF1,NUDT1,NAPRT,ACSF2,GPX1
GO:0065003	protein-containing complex assembly	53	1514	0.24	0.0085	9606.ENSP00000215565,9606.ENSP00000215754,9606.ENSP00000215980,9606.ENSP00000225538,9606.ENSP00000233627,9606.ENSP00000252486,9606.ENSP00000260447,9606.ENSP00000261070,9606.ENSP00000261623,9606.ENSP00000263867,9606.ENSP00000264009,9606.ENSP00000269848,9606.ENSP00000273814,9606.ENSP00000290079,9606.ENSP00000297508,9606.ENSP00000301457,9606.ENSP00000322450,9606.ENSP00000329662,9606.ENSP00000332371,…	NDUFB7,MIF,CENPM,P2RX1,NDUFS7,APOE,GCHFR,COX17,CYBA,CAPG,HSF4,PFKL,DGKQ,TMEM141,MICALL2,NDUFA7,NDUFV1,H1FX,COL7A1,UQCR10,SHMT2,RPSA,GPAA1,HIST1H2BK,MT-ND6,MT-ND1,RPL12,MT-ND5,MT-ND4,MT-CO3,MT-ND2,MSRB1,MT-ND3,H3F3A,HIST1H2BL,NDUFB6,STRA13,CLDN3,VAMP1,RABGGTA,KCTD17,NDUFA11,PILRB,SLC9A3R2,MUC20,NDUFA13,GSDMD,SCO2,TAF1C,APOC1,TRAPPC5,RPS5,HIST1H4A
GO:0006518	peptide metabolic process	24	497	0.38	0.0117	9606.ENSP00000216465,9606.ENSP00000217182,9606.ENSP00000232744,9606.ENSP00000241337,9606.ENSP00000253108,9606.ENSP00000301457,9606.ENSP00000322419,9606.ENSP00000323065,9606.ENSP00000331849,9606.ENSP00000340691,9606.ENSP00000345957,9606.ENSP00000346037,9606.ENSP00000346067,9606.ENSP00000354739,9606.ENSP00000358060,9606.ENSP00000361076,9606.ENSP00000370962,9606.ENSP00000376807,9606.ENSP00000381607,…	GSTZ1,EEF1A2,ABTB1,GSTM2,EIF3G,NDUFA7,RPLP2,GADD45GIP1,MRPL54,EIF4EBP1,RPS21,RPLP1,RPSA,RPL12,TARS2,RPL7A,GGT6,DPEP1,GSTP1,GPX1,GNB2L1,RPS20,FAU,RPS5
GO:1901700	response to oxygen-containing compound	50	1427	0.24	0.0128	9606.ENSP00000007414,9606.ENSP00000013807,9606.ENSP00000218388,9606.ENSP00000220003,9606.ENSP00000225538,9606.ENSP00000246635,9606.ENSP00000252486,9606.ENSP00000255389,9606.ENSP00000261623,9606.ENSP00000269848,9606.ENSP00000273814,9606.ENSP00000291527,9606.ENSP00000294304,9606.ENSP00000301522,9606.ENSP00000319713,9606.ENSP00000320886,9606.ENSP00000333547,9606.ENSP00000333769,9606.ENSP00000340691,…	OSBPL7,ERCC1,TIMP1,CSK,P2RX1,KRT13,APOE,PEMT,CYBA,PFKL,DGKQ,TFF1,LRP5,PRDX2,AGTRAP,MLXIPL,RAB11B,BSG,EIF4EBP1,LAMTOR4,ABCA2,APOD,KCNJ11,TNFRSF14,SDF4,COMT,MT-CYB,MT-ND6,MT-ND1,MT-ND5,MT-ND4,LAMTOR2,NDOR1,DMAP1,TNFRSF25,APRT,BAIAP2L2,DPEP1,RGS19,CLDN3,SLC26A6,TSPO,MB,GSTP1,NFATC4,GPX1,AOC1,NDUFA13,GNB2L1,CCS
GO:0006614	SRP-dependent cotranslational protein targeting to membrane	9	92	0.69	0.0163	9606.ENSP00000322419,9606.ENSP00000345957,9606.ENSP00000346037,9606.ENSP00000346067,9606.ENSP00000354739,9606.ENSP00000361076,9606.ENSP00000429374,9606.ENSP00000435370,9606.ENSP00000472985	RPLP2,RPS21,RPLP1,RPSA,RPL12,RPL7A,RPS20,FAU,RPS5
GO:1902600	proton transmembrane transport	11	137	0.6	0.0163	9606.ENSP00000215375,9606.ENSP00000301327,9606.ENSP00000306003,9606.ENSP00000322020,9606.ENSP00000354499,9606.ENSP00000354554,9606.ENSP00000354632,9606.ENSP00000354876,9606.ENSP00000354982,9606.ENSP00000355265,9606.ENSP00000369948	ATP5D,MFSD3,ATP5I,SLC25A22,MT-CO1,MT-CYB,MT-ATP6,MT-CO2,MT-CO3,MT-ATP8,SLC22A18
GO:0006413	translational initiation	11	142	0.58	0.021	9606.ENSP00000253108,9606.ENSP00000322419,9606.ENSP00000340691,9606.ENSP00000345957,9606.ENSP00000346037,9606.ENSP00000346067,9606.ENSP00000354739,9606.ENSP00000361076,9606.ENSP00000429374,9606.ENSP00000435370,9606.ENSP00000472985	EIF3G,RPLP2,EIF4EBP1,RPS21,RPLP1,RPSA,RPL12,RPL7A,RPS20,FAU,RPS5
GO:0042493	response to drug	35	900	0.28	0.021	9606.ENSP00000221496,9606.ENSP00000225538,9606.ENSP00000241337,9606.ENSP00000245185,9606.ENSP00000255389,9606.ENSP00000261623,9606.ENSP00000273814,9606.ENSP00000322020,9606.ENSP00000328977,9606.ENSP00000332646,9606.ENSP00000340691,9606.ENSP00000344155,9606.ENSP00000345179,9606.ENSP00000345708,9606.ENSP00000353094,9606.ENSP00000354511,9606.ENSP00000354554,9606.ENSP00000354665,9606.ENSP00000354687,…	AMH,P2RX1,GSTM2,MT2A,PEMT,CYBA,DGKQ,SLC25A22,RPH3AL,MFSD10,EIF4EBP1,ABCA2,APOD,KCNJ11,SDF4,COMT,MT-CYB,MT-ND6,MT-ND1,MT-ND5,MT-ND4,NDOR1,DMAP1,SLC22A18,DPEP1,RGS19,CLDN3,SLC26A6,TSPO,MB,GSTP1,MDK,GPX1,AOC1,SLC25A10
GO:0043603	cellular amide metabolic process	30	732	0.31	0.0235	9606.ENSP00000216465,9606.ENSP00000217182,9606.ENSP00000225538,9606.ENSP00000232744,9606.ENSP00000241337,9606.ENSP00000253108,9606.ENSP00000255389,9606.ENSP00000301457,9606.ENSP00000304592,9606.ENSP00000322419,9606.ENSP00000323065,9606.ENSP00000331849,9606.ENSP00000333667,9606.ENSP00000340691,9606.ENSP00000345957,9606.ENSP00000346037,9606.ENSP00000346067,9606.ENSP00000354739,9606.ENSP00000358060,…	GSTZ1,EEF1A2,P2RX1,ABTB1,GSTM2,EIF3G,PEMT,NDUFA7,FASN,RPLP2,GADD45GIP1,MRPL54,SHMT2,EIF4EBP1,RPS21,RPLP1,RPSA,RPL12,TARS2,RPL7A,GGT6,DPEP1,GSTP1,GAL3ST1,ACSF2,GPX1,GNB2L1,RPS20,FAU,RPS5
GO:0043604	amide biosynthetic process	23	495	0.36	0.0235	9606.ENSP00000217182,9606.ENSP00000225538,9606.ENSP00000232744,9606.ENSP00000253108,9606.ENSP00000255389,9606.ENSP00000301457,9606.ENSP00000304592,9606.ENSP00000322419,9606.ENSP00000323065,9606.ENSP00000331849,9606.ENSP00000340691,9606.ENSP00000345957,9606.ENSP00000346037,9606.ENSP00000346067,9606.ENSP00000354739,9606.ENSP00000358060,9606.ENSP00000361076,9606.ENSP00000370962,9606.ENSP00000385735,…	EEF1A2,P2RX1,ABTB1,EIF3G,PEMT,NDUFA7,FASN,RPLP2,GADD45GIP1,MRPL54,EIF4EBP1,RPS21,RPLP1,RPSA,RPL12,TARS2,RPL7A,GGT6,GAL3ST1,GNB2L1,RPS20,FAU,RPS5
GO:0070972	protein localization to endoplasmic reticulum	10	123	0.6	0.0253	9606.ENSP00000322419,9606.ENSP00000345957,9606.ENSP00000346037,9606.ENSP00000346067,9606.ENSP00000347206,9606.ENSP00000354739,9606.ENSP00000361076,9606.ENSP00000429374,9606.ENSP00000435370,9606.ENSP00000472985	RPLP2,RPS21,RPLP1,RPSA,GPAA1,RPL12,RPL7A,RPS20,FAU,RPS5
GO:1901566	organonitrogen compound biosynthetic process	47	1370	0.23	0.0266	9606.ENSP00000026218,9606.ENSP00000215375,9606.ENSP00000216465,9606.ENSP00000217182,9606.ENSP00000225538,9606.ENSP00000232744,9606.ENSP00000241337,9606.ENSP00000250974,9606.ENSP00000252486,9606.ENSP00000253108,9606.ENSP00000255389,9606.ENSP00000265471,9606.ENSP00000269848,9606.ENSP00000301457,9606.ENSP00000304592,9606.ENSP00000306003,9606.ENSP00000322419,9606.ENSP00000323065,9606.ENSP00000325618,…	PIGQ,ATP5D,GSTZ1,EEF1A2,P2RX1,ABTB1,GSTM2,ABHD17A,APOE,EIF3G,PEMT,B3GAT3,PFKL,NDUFA7,FASN,ATP5I,RPLP2,GADD45GIP1,PARP10,NADSYN1,MRPL54,SHMT2,ZDHHC1,EIF4EBP1,RPS21,RPLP1,RPSA,GPAA1,MT-ATP6,RPL12,MT-ATP8,DPM3,TARS2,RPL7A,ZDHHC12,LPIN3,APRT,GGT6,TSPO,GSTP1,GAL3ST1,NAPRT,MUC20,GNB2L1,RPS20,FAU,RPS5
GO:0043933	protein-containing complex subunit organization	57	1770	0.2	0.0286	9606.ENSP00000215565,9606.ENSP00000215754,9606.ENSP00000215980,9606.ENSP00000225538,9606.ENSP00000233627,9606.ENSP00000252486,9606.ENSP00000260447,9606.ENSP00000261070,9606.ENSP00000261623,9606.ENSP00000263867,9606.ENSP00000264009,9606.ENSP00000269848,9606.ENSP00000273814,9606.ENSP00000290079,9606.ENSP00000297508,9606.ENSP00000301457,9606.ENSP00000322450,9606.ENSP00000323065,9606.ENSP00000329662,…	NDUFB7,MIF,CENPM,P2RX1,NDUFS7,APOE,GCHFR,COX17,CYBA,CAPG,HSF4,PFKL,DGKQ,TMEM141,MICALL2,NDUFA7,NDUFV1,GADD45GIP1,H1FX,MRPL54,COL7A1,UQCR10,SHMT2,RPSA,GPAA1,HIST1H2BK,MT-ND6,MT-ND1,RPL12,MT-ND5,MT-ND4,MT-CO3,MT-ND2,MSRB1,MT-ND3,H3F3A,HIST1H2BL,DVL1,NDUFB6,STRA13,CLDN3,VAMP1,CHMP1A,RABGGTA,KCTD17,NDUFA11,PILRB,SLC9A3R2,MUC20,NDUFA13,GSDMD,SCO2,TAF1C,APOC1,TRAPPC5,RPS5,HIST1H4A
GO:0046688	response to copper ion	5	28	0.95	0.0326	9606.ENSP00000215375,9606.ENSP00000354499,9606.ENSP00000354554,9606.ENSP00000391397,9606.ENSP00000411613	ATP5D,MT-CO1,MT-CYB,MT1G,AOC1
GO:0043043	peptide biosynthetic process	19	386	0.39	0.0349	9606.ENSP00000217182,9606.ENSP00000232744,9606.ENSP00000253108,9606.ENSP00000301457,9606.ENSP00000322419,9606.ENSP00000323065,9606.ENSP00000331849,9606.ENSP00000340691,9606.ENSP00000345957,9606.ENSP00000346037,9606.ENSP00000346067,9606.ENSP00000354739,9606.ENSP00000358060,9606.ENSP00000361076,9606.ENSP00000370962,9606.ENSP00000426909,9606.ENSP00000429374,9606.ENSP00000435370,9606.ENSP00000472985	EEF1A2,ABTB1,EIF3G,NDUFA7,RPLP2,GADD45GIP1,MRPL54,EIF4EBP1,RPS21,RPLP1,RPSA,RPL12,TARS2,RPL7A,GGT6,GNB2L1,RPS20,FAU,RPS5
GO:0098869	cellular oxidant detoxification	8	86	0.66	0.0387	9606.ENSP00000216465,9606.ENSP00000241337,9606.ENSP00000252486,9606.ENSP00000301522,9606.ENSP00000381607,9606.ENSP00000407375,9606.ENSP00000436318,9606.ENSP00000473185	GSTZ1,GSTM2,APOE,PRDX2,GSTP1,GPX1,CCS,SEPW1
GO:0015850	organic hydroxy compound transport	10	134	0.57	0.0413	9606.ENSP00000007414,9606.ENSP00000225538,9606.ENSP00000252486,9606.ENSP00000263093,9606.ENSP00000263650,9606.ENSP00000297512,9606.ENSP00000332646,9606.ENSP00000378920,9606.ENSP00000379563,9606.ENSP00000465356	OSBPL7,P2RX1,APOE,SLC27A5,OSBPL5,ASIC3,MFSD10,SLC26A6,TSPO,APOC1
GO:0006412	translation	18	362	0.39	0.0415	9606.ENSP00000217182,9606.ENSP00000232744,9606.ENSP00000253108,9606.ENSP00000301457,9606.ENSP00000322419,9606.ENSP00000323065,9606.ENSP00000331849,9606.ENSP00000340691,9606.ENSP00000345957,9606.ENSP00000346037,9606.ENSP00000346067,9606.ENSP00000354739,9606.ENSP00000358060,9606.ENSP00000361076,9606.ENSP00000426909,9606.ENSP00000429374,9606.ENSP00000435370,9606.ENSP00000472985	EEF1A2,ABTB1,EIF3G,NDUFA7,RPLP2,GADD45GIP1,MRPL54,EIF4EBP1,RPS21,RPLP1,RPSA,RPL12,TARS2,RPL7A,GNB2L1,RPS20,FAU,RPS5
GO:0006810	transport	111	4130	0.12	0.0448	9606.ENSP00000007414,9606.ENSP00000053867,9606.ENSP00000207549,9606.ENSP00000215375,9606.ENSP00000215754,9606.ENSP00000218388,9606.ENSP00000219150,9606.ENSP00000220616,9606.ENSP00000225538,9606.ENSP00000225777,9606.ENSP00000236671,9606.ENSP00000248553,9606.ENSP00000252486,9606.ENSP00000253193,9606.ENSP00000261070,9606.ENSP00000261623,9606.ENSP00000262304,9606.ENSP00000262812,9606.ENSP00000263093,…	OSBPL7,GRN,UNC13D,ATP5D,MIF,TIMP1,CORO1A,TG,P2RX1,SYNGR2,CTSD,HSPB1,APOE,LRP3,COX17,CYBA,PKD1,COPE,SLC27A5,SPTBN4,CD81,OSBPL5,MFGE8,PFKL,SLC4A3,SCRN2,LRP5,STK11IP,NKD2,MICALL2,ASIC3,MFSD3,LRG1,GAA,ATP5I,LTBP4,AP1G2,SSNA1,ARHGAP33,SLC25A22,RPLP2,RPH3AL,SIVA1,COL7A1,MFSD10,ANO9,RAB11B,BSG,SFN,ABCA2,APOD,KCNJ11,RPS21,RPLP1,RPSA,PDLIM7,CCDC88B,SCRIB,LRP10,SDF4,MT-CO1,MT-CYB,MT-ATP6,SLC39A13,RPL12,MT-…
GO:0006887	exocytosis	30	774	0.28	0.0448	9606.ENSP00000053867,9606.ENSP00000207549,9606.ENSP00000215754,9606.ENSP00000218388,9606.ENSP00000219150,9606.ENSP00000225538,9606.ENSP00000225777,9606.ENSP00000236671,9606.ENSP00000261623,9606.ENSP00000269848,9606.ENSP00000290216,9606.ENSP00000295641,9606.ENSP00000296849,9606.ENSP00000302621,9606.ENSP00000305692,9606.ENSP00000328977,9606.ENSP00000333547,9606.ENSP00000349486,9606.ENSP00000353094,…	GRN,UNC13D,MIF,TIMP1,CORO1A,P2RX1,SYNGR2,CTSD,CYBA,PFKL,SCRN2,STK11IP,NKD2,LRG1,GAA,RPH3AL,RAB11B,SCRIB,SDF4,LAMTOR2,DPP7,APRT,SYT8,VAMP1,GSTP1,NAPRT,AOC1,CAPN1,GSDMD,SYTL1
GO:0042776	mitochondrial ATP synthesis coupled proton transport	4	17	1.07	0.0448	9606.ENSP00000215375,9606.ENSP00000306003,9606.ENSP00000354632,9606.ENSP00000355265	ATP5D,ATP5I,MT-ATP6,MT-ATP8
GO:0071248	cellular response to metal ion	11	162	0.53	0.0448	9606.ENSP00000245185,9606.ENSP00000307706,9606.ENSP00000334872,9606.ENSP00000369146,9606.ENSP00000376807,9606.ENSP00000377995,9606.ENSP00000379563,9606.ENSP00000388910,9606.ENSP00000391397,9606.ENSP00000411613,9606.ENSP00000478425	MT2A,MT1E,MT1F,MT1M,DPEP1,MT1X,TSPO,NFATC4,MT1G,AOC1,MT1A
GO:0071276	cellular response to cadmium ion	5	31	0.9	0.0448	9606.ENSP00000307706,9606.ENSP00000334872,9606.ENSP00000377995,9606.ENSP00000391397,9606.ENSP00000478425	MT1E,MT1F,MT1X,MT1G,MT1A
GO:0090150	establishment of protein localization to membrane	13	217	0.47	0.0448	9606.ENSP00000322419,9606.ENSP00000333547,9606.ENSP00000345957,9606.ENSP00000346037,9606.ENSP00000346067,9606.ENSP00000349486,9606.ENSP00000354739,9606.ENSP00000361076,9606.ENSP00000423673,9606.ENSP00000429374,9606.ENSP00000435370,9606.ENSP00000466379,9606.ENSP00000472985	RPLP2,RAB11B,RPS21,RPLP1,RPSA,SCRIB,RPL12,RPL7A,NDUFA13,RPS20,FAU,ASNA1,RPS5
GO:0042157	lipoprotein metabolic process	9	114	0.59	0.0461	9606.ENSP00000026218,9606.ENSP00000250974,9606.ENSP00000252486,9606.ENSP00000340299,9606.ENSP00000347206,9606.ENSP00000357384,9606.ENSP00000361748,9606.ENSP00000363638,9606.ENSP00000465356	PIGQ,ABHD17A,APOE,ZDHHC1,GPAA1,DPM3,ZDHHC12,LYPLA2,APOC1
GO:0051186	cofactor metabolic process	21	467	0.35	0.0461	9606.ENSP00000216465,9606.ENSP00000241337,9606.ENSP00000255389,9606.ENSP00000260447,9606.ENSP00000261623,9606.ENSP00000262302,9606.ENSP00000269848,9606.ENSP00000301522,9606.ENSP00000304592,9606.ENSP00000315351,9606.ENSP00000325618,9606.ENSP00000326424,9606.ENSP00000327070,9606.ENSP00000333667,9606.ENSP00000370962,9606.ENSP00000376807,9606.ENSP00000379563,9606.ENSP00000381607,9606.ENSP00000401508,…	GSTZ1,GSTM2,PEMT,GCHFR,CYBA,NUBP2,PFKL,PRDX2,FASN,D2HGDH,PARP10,NADSYN1,MDH2,SHMT2,GGT6,DPEP1,TSPO,GSTP1,NAPRT,ACSF2,GPX1
GO:0006979	response to oxidative stress	18	373	0.38	0.0497	9606.ENSP00000013807,9606.ENSP00000252486,9606.ENSP00000261623,9606.ENSP00000301522,9606.ENSP00000345179,9606.ENSP00000354499,9606.ENSP00000354665,9606.ENSP00000354687,9606.ENSP00000354813,9606.ENSP00000355084,9606.ENSP00000355206,9606.ENSP00000376807,9606.ENSP00000380241,9606.ENSP00000380489,9606.ENSP00000381607,9606.ENSP00000401508,9606.ENSP00000407375,9606.ENSP00000436318	ERCC1,APOE,CYBA,PRDX2,APOD,MT-CO1,MT-ND6,MT-ND1,MT-ND5,MSRB1,MT-ND3,DPEP1,NUDT1,MB,GSTP1,NAPRT,GPX1,CCS

## Sheet: Par_vs_Coinfection_24_Up_KEGG
Supplementary table S10: Results from the Gene Ontology (GO) analysis in the category for biological process complete (GObp) and Pathway Enrichment (KEGG pathways) from single infections compared to co-infected cells at both 24 and 72 hpi.
#term ID	term description	observed gene count	background gene count	strength	false discovery rate	matching proteins in your network (IDs)	matching proteins in your network (labels)
hsa04657	IL-17 signaling pathway	10	92	1.12	1.98e-06	9606.ENSP00000252818,9606.ENSP00000261845,9606.ENSP00000296026,9606.ENSP00000305422,9606.ENSP00000306512,9606.ENSP00000310170,9606.ENSP00000356438,9606.ENSP00000360266,9606.ENSP00000427279,9606.ENSP00000481570	JUND,MAPK6,CXCL3,CEBPB,CXCL8,FOSL1,PTGS2,JUN,CXCL2,TNFAIP3
hsa04668	TNF signaling pathway	9	108	1	4.4e-05	9606.ENSP00000296026,9606.ENSP00000305422,9606.ENSP00000350359,9606.ENSP00000356438,9606.ENSP00000360266,9606.ENSP00000368683,9606.ENSP00000427279,9606.ENSP00000481570,9606.ENSP00000482657	CXCL3,CEBPB,CREB5,PTGS2,JUN,EDN1,CXCL2,TNFAIP3,MAP3K14
hsa04141	Protein processing in endoplasmic reticulum	10	161	0.87	8.58e-05	9606.ENSP00000200453,9606.ENSP00000216037,9606.ENSP00000280551,9606.ENSP00000307235,9606.ENSP00000378721,9606.ENSP00000381282,9606.ENSP00000409555,9606.ENSP00000433560,9606.ENSP00000448665,9606.ENSP00000473631	PPP1R15A,XBP1,SEC24D,EIF2AK3,SEC31A,VIMP,HERPUD1,CRYAB,DDIT3,DNAJC3
hsa04010	MAPK signaling pathway	12	293	0.69	0.00036	9606.ENSP00000239223,9606.ENSP00000244869,9606.ENSP00000252818,9606.ENSP00000263339,9606.ENSP00000264431,9606.ENSP00000346508,9606.ENSP00000355866,9606.ENSP00000358596,9606.ENSP00000360025,9606.ENSP00000360266,9606.ENSP00000448665,9606.ENSP00000482657	DUSP1,EREG,JUND,IL1A,RAPGEF2,PDGFA,DUSP10,DUSP5,GADD45A,JUN,DDIT3,MAP3K14

## Sheet: Par_vs_Coinfection_24_Down_KEGG
Supplementary table S10: Results from the Gene Ontology (GO) analysis in the category for biological process complete (GObp) and Pathway Enrichment (KEGG pathways) from single infections compared to co-infected cells at both 24 and 72 hpi.
#term ID	term description	observed gene count	background gene count	strength	false discovery rate	matching proteins in your network (IDs)	matching proteins in your network (labels)
hsa00190	Oxidative phosphorylation	25	131	0.98	1.48e-13	9606.ENSP00000215375,9606.ENSP00000215565,9606.ENSP00000233627,9606.ENSP00000261070,9606.ENSP00000301457,9606.ENSP00000306003,9606.ENSP00000322450,9606.ENSP00000332887,9606.ENSP00000354499,9606.ENSP00000354554,9606.ENSP00000354632,9606.ENSP00000354665,9606.ENSP00000354687,9606.ENSP00000354728,9606.ENSP00000354813,9606.ENSP00000354876,9606.ENSP00000354961,9606.ENSP00000354982,9606.ENSP00000355046,…	ATP5D,NDUFB7,NDUFS7,COX17,NDUFA7,ATP5I,NDUFV1,UQCR10,MT-CO1,MT-CYB,MT-ATP6,MT-ND6,MT-ND1,MT-ND4L,MT-ND5,MT-CO2,MT-ND4,MT-CO3,MT-ND2,MT-ND3,MT-ATP8,NDUFB6,NDUFA11,NDUFA13,UQCR11
hsa04714	Thermogenesis	29	228	0.8	3.08e-12	9606.ENSP00000215375,9606.ENSP00000215565,9606.ENSP00000215659,9606.ENSP00000233627,9606.ENSP00000261070,9606.ENSP00000301457,9606.ENSP00000306003,9606.ENSP00000322450,9606.ENSP00000332887,9606.ENSP00000333685,9606.ENSP00000337332,9606.ENSP00000354499,9606.ENSP00000354554,9606.ENSP00000354632,9606.ENSP00000354665,9606.ENSP00000354687,9606.ENSP00000354728,9606.ENSP00000354813,9606.ENSP00000354876,…	ATP5D,NDUFB7,MAPK12,NDUFS7,COX17,NDUFA7,ATP5I,NDUFV1,UQCR10,MAPK11,SIRT6,MT-CO1,MT-CYB,MT-ATP6,MT-ND6,MT-ND1,MT-ND4L,MT-ND5,MT-CO2,MT-ND4,MT-CO3,MT-ND2,MT-ND3,MT-ATP8,NDUFB6,NDUFA11,NDUFA13,MLST8,UQCR11
hsa05012	Parkinson's disease	24	142	0.92	3.08e-12	9606.ENSP00000215375,9606.ENSP00000215565,9606.ENSP00000233627,9606.ENSP00000301457,9606.ENSP00000322450,9606.ENSP00000332887,9606.ENSP00000333266,9606.ENSP00000354499,9606.ENSP00000354554,9606.ENSP00000354632,9606.ENSP00000354665,9606.ENSP00000354687,9606.ENSP00000354728,9606.ENSP00000354813,9606.ENSP00000354876,9606.ENSP00000354961,9606.ENSP00000354982,9606.ENSP00000355046,9606.ENSP00000355206,…	ATP5D,NDUFB7,NDUFS7,NDUFA7,NDUFV1,UQCR10,UBA7,MT-CO1,MT-CYB,MT-ATP6,MT-ND6,MT-ND1,MT-ND4L,MT-ND5,MT-CO2,MT-ND4,MT-CO3,MT-ND2,MT-ND3,MT-ATP8,NDUFB6,NDUFA11,NDUFA13,UQCR11
hsa04723	Retrograde endocannabinoid signaling	19	148	0.8	5.34e-08	9606.ENSP00000215565,9606.ENSP00000215659,9606.ENSP00000233627,9606.ENSP00000243167,9606.ENSP00000301457,9606.ENSP00000305260,9606.ENSP00000322450,9606.ENSP00000333685,9606.ENSP00000354665,9606.ENSP00000354687,9606.ENSP00000354728,9606.ENSP00000354813,9606.ENSP00000354961,9606.ENSP00000355046,9606.ENSP00000355206,9606.ENSP00000367848,9606.ENSP00000369176,9606.ENSP00000389160,9606.ENSP00000423673	NDUFB7,MAPK12,NDUFS7,FAAH,NDUFA7,GNB2,NDUFV1,MAPK11,MT-ND6,MT-ND1,MT-ND4L,MT-ND5,MT-ND4,MT-ND2,MT-ND3,GABRD,NDUFB6,NDUFA11,NDUFA13
hsa01100	Metabolic pathways	59	1250	0.37	1.11e-07	9606.ENSP00000026218,9606.ENSP00000215375,9606.ENSP00000215565,9606.ENSP00000216465,9606.ENSP00000233627,9606.ENSP00000242592,9606.ENSP00000255389,9606.ENSP00000261070,9606.ENSP00000263093,9606.ENSP00000265471,9606.ENSP00000269848,9606.ENSP00000273588,9606.ENSP00000273814,9606.ENSP00000295453,9606.ENSP00000301457,9606.ENSP00000304592,9606.ENSP00000305692,9606.ENSP00000306003,9606.ENSP00000322450,…	PIGQ,ATP5D,NDUFB7,GSTZ1,NDUFS7,ACADS,PEMT,COX17,SLC27A5,B3GAT3,PFKL,AMT,DGKQ,ALPPL2,NDUFA7,FASN,GAA,ATP5I,NDUFV1,POLR2L,NADSYN1,MDH2,UQCR10,INPP5J,SHMT2,ISYNA1,GPAA1,MT-CO1,COMT,MT-CYB,MT-ATP6,MT-ND6,MT-ND1,MT-ND4L,MT-ND5,MT-CO2,MT-ND4,MT-CO3,MT-ND2,MT-ND3,MT-ATP8,DPM3,SARDH,LPIN3,APRT,NDUFB6,GGT6,ENSG00000168970,ALPP,GAL3ST1,SDSL,TST,NDUFA11,NAPRT,POLD1,AOC1,NDUFA13,UQCR11,POLR2E
hsa05010	Alzheimer's disease	18	168	0.72	1.29e-06	9606.ENSP00000215375,9606.ENSP00000215565,9606.ENSP00000233627,9606.ENSP00000252486,9606.ENSP00000301457,9606.ENSP00000322450,9606.ENSP00000332887,9606.ENSP00000354499,9606.ENSP00000354554,9606.ENSP00000354632,9606.ENSP00000354876,9606.ENSP00000354982,9606.ENSP00000355265,9606.ENSP00000369176,9606.ENSP00000389160,9606.ENSP00000423673,9606.ENSP00000431984,9606.ENSP00000467262	ATP5D,NDUFB7,NDUFS7,APOE,NDUFA7,NDUFV1,UQCR10,MT-CO1,MT-CYB,MT-ATP6,MT-CO2,MT-CO3,MT-ATP8,NDUFB6,NDUFA11,NDUFA13,CAPN1,UQCR11
hsa05016	Huntington's disease	19	193	0.69	1.59e-06	9606.ENSP00000215375,9606.ENSP00000215565,9606.ENSP00000233627,9606.ENSP00000301457,9606.ENSP00000322450,9606.ENSP00000324124,9606.ENSP00000332887,9606.ENSP00000354499,9606.ENSP00000354554,9606.ENSP00000354632,9606.ENSP00000354876,9606.ENSP00000354982,9606.ENSP00000355265,9606.ENSP00000369176,9606.ENSP00000389160,9606.ENSP00000407375,9606.ENSP00000423673,9606.ENSP00000467262,9606.ENSP00000478303	ATP5D,NDUFB7,NDUFS7,NDUFA7,NDUFV1,POLR2L,UQCR10,MT-CO1,MT-CYB,MT-ATP6,MT-CO2,MT-CO3,MT-ATP8,NDUFB6,NDUFA11,GPX1,NDUFA13,UQCR11,POLR2E
hsa04932	Non-alcoholic fatty liver disease (NAFLD)	14	149	0.67	0.00013	9606.ENSP00000215565,9606.ENSP00000233627,9606.ENSP00000301457,9606.ENSP00000320886,9606.ENSP00000322450,9606.ENSP00000332887,9606.ENSP00000354499,9606.ENSP00000354554,9606.ENSP00000354876,9606.ENSP00000354982,9606.ENSP00000369176,9606.ENSP00000389160,9606.ENSP00000423673,9606.ENSP00000467262	NDUFB7,NDUFS7,NDUFA7,MLXIPL,NDUFV1,UQCR10,MT-CO1,MT-CYB,MT-CO2,MT-CO3,NDUFB6,NDUFA11,NDUFA13,UQCR11
hsa04978	Mineral absorption	8	51	0.89	0.00051	9606.ENSP00000245185,9606.ENSP00000307706,9606.ENSP00000334872,9606.ENSP00000369146,9606.ENSP00000377995,9606.ENSP00000378920,9606.ENSP00000391397,9606.ENSP00000478425	MT2A,MT1E,MT1F,MT1M,MT1X,SLC26A6,MT1G,MT1A

## Sheet: Vir_vs_Coinfection_24_up_Bio
Supplementary table S10: Results from the Gene Ontology (GO) analysis in the category for biological process complete (GObp) and Pathway Enrichment (KEGG pathways) from single infections compared to co-infected cells at both 24 and 72 hpi.
NOTE-Because of low number of genes no GO bp were identified

## Sheet: Vir_vs_Coinfection_24_Down_Bio
Supplementary table S10: Results from the Gene Ontology (GO) analysis in the category for biological process complete (GObp) and Pathway Enrichment (KEGG pathways) from single infections compared to co-infected cells at both 24 and 72 hpi.
#term ID	term description	observed gene count	background gene count	strength	false discovery rate	matching proteins in your network (IDs)	matching proteins in your network (labels)
GO:0006334	nucleosome assembly	15	137	1.2	3.58e-10	9606.ENSP00000215980,9606.ENSP00000244534,9606.ENSP00000289316,9606.ENSP00000329662,9606.ENSP00000339566,9606.ENSP00000339835,9606.ENSP00000349430,9606.ENSP00000366956,9606.ENSP00000366974,9606.ENSP00000367034,9606.ENSP00000443017,9606.ENSP00000445831,9606.ENSP00000483283,9606.ENSP00000483903,9606.ENSP00000484789	CENPM,HIST1H1D,HIST1H2BD,H1FX,HIST1H1C,H3F3C,HIST1H2BK,HIST1H4H,HIST1H4B,HIST1H4C,HIST4H4,HIST2H2BF,HIST1H3I,HIST1H2BN,HIST1H4E
GO:0010043	response to zinc ion	8	52	1.35	2.01e-06	9606.ENSP00000245185,9606.ENSP00000307706,9606.ENSP00000332449,9606.ENSP00000354689,9606.ENSP00000377995,9606.ENSP00000379563,9606.ENSP00000391397,9606.ENSP00000478425	MT2A,MT1E,CRIP1,SLC39A13,MT1X,TSPO,MT1G,MT1A
GO:0071294	cellular response to zinc ion	6	19	1.66	3.51e-06	9606.ENSP00000245185,9606.ENSP00000307706,9606.ENSP00000377995,9606.ENSP00000379563,9606.ENSP00000391397,9606.ENSP00000478425	MT2A,MT1E,MT1X,TSPO,MT1G,MT1A
GO:0060964	regulation of gene silencing by miRNA	8	78	1.17	2.93e-05	9606.ENSP00000324124,9606.ENSP00000366956,9606.ENSP00000366974,9606.ENSP00000367034,9606.ENSP00000443017,9606.ENSP00000469647,9606.ENSP00000483283,9606.ENSP00000484789	POLR2L,HIST1H4H,HIST1H4B,HIST1H4C,HIST4H4,ZFP36,HIST1H3I,HIST1H4E
GO:0006335	DNA replication-dependent nucleosome assembly	6	32	1.43	3.63e-05	9606.ENSP00000366956,9606.ENSP00000366974,9606.ENSP00000367034,9606.ENSP00000443017,9606.ENSP00000483283,9606.ENSP00000484789	HIST1H4H,HIST1H4B,HIST1H4C,HIST4H4,HIST1H3I,HIST1H4E
GO:0045653	negative regulation of megakaryocyte differentiation	5	18	1.6	6.31e-05	9606.ENSP00000366956,9606.ENSP00000366974,9606.ENSP00000367034,9606.ENSP00000443017,9606.ENSP00000484789	HIST1H4H,HIST1H4B,HIST1H4C,HIST4H4,HIST1H4E
GO:0000183	chromatin silencing at rDNA	6	37	1.37	6.42e-05	9606.ENSP00000366956,9606.ENSP00000366974,9606.ENSP00000367034,9606.ENSP00000443017,9606.ENSP00000483283,9606.ENSP00000484789	HIST1H4H,HIST1H4B,HIST1H4C,HIST4H4,HIST1H3I,HIST1H4E
GO:0010038	response to metal ion	13	339	0.74	0.00012	9606.ENSP00000215375,9606.ENSP00000245185,9606.ENSP00000291527,9606.ENSP00000306245,9606.ENSP00000307706,9606.ENSP00000332449,9606.ENSP00000333769,9606.ENSP00000354689,9606.ENSP00000376807,9606.ENSP00000377995,9606.ENSP00000379563,9606.ENSP00000391397,9606.ENSP00000478425	ATP5D,MT2A,TFF1,FOS,MT1E,CRIP1,BSG,SLC39A13,DPEP1,MT1X,TSPO,MT1G,MT1A
GO:0034080	CENP-A containing nucleosome assembly	6	42	1.31	0.00012	9606.ENSP00000215980,9606.ENSP00000366956,9606.ENSP00000366974,9606.ENSP00000367034,9606.ENSP00000443017,9606.ENSP00000484789	CENPM,HIST1H4H,HIST1H4B,HIST1H4C,HIST4H4,HIST1H4E
GO:0034622	cellular protein-containing complex assembly	20	832	0.54	0.00016	9606.ENSP00000215980,9606.ENSP00000244534,9606.ENSP00000261623,9606.ENSP00000289316,9606.ENSP00000301457,9606.ENSP00000329662,9606.ENSP00000332887,9606.ENSP00000339566,9606.ENSP00000339835,9606.ENSP00000346067,9606.ENSP00000349430,9606.ENSP00000366956,9606.ENSP00000366974,9606.ENSP00000367034,9606.ENSP00000443017,9606.ENSP00000444433,9606.ENSP00000445831,9606.ENSP00000483283,9606.ENSP00000483903,…	CENPM,HIST1H1D,CYBA,HIST1H2BD,NDUFA7,H1FX,UQCR10,HIST1H1C,H3F3C,RPSA,HIST1H2BK,HIST1H4H,HIST1H4B,HIST1H4C,HIST4H4,SCO2,HIST2H2BF,HIST1H3I,HIST1H2BN,HIST1H4E
GO:0010035	response to inorganic substance	15	491	0.64	0.00022	9606.ENSP00000215375,9606.ENSP00000245185,9606.ENSP00000291527,9606.ENSP00000306245,9606.ENSP00000307706,9606.ENSP00000332449,9606.ENSP00000333769,9606.ENSP00000354689,9606.ENSP00000376807,9606.ENSP00000377995,9606.ENSP00000379563,9606.ENSP00000384564,9606.ENSP00000391397,9606.ENSP00000407375,9606.ENSP00000478425	ATP5D,MT2A,TFF1,FOS,MT1E,CRIP1,BSG,SLC39A13,DPEP1,MT1X,TSPO,SELM,MT1G,GPX1,MT1A
GO:0051290	protein heterotetramerization	6	52	1.22	0.00026	9606.ENSP00000366956,9606.ENSP00000366974,9606.ENSP00000367034,9606.ENSP00000443017,9606.ENSP00000483283,9606.ENSP00000484789	HIST1H4H,HIST1H4B,HIST1H4C,HIST4H4,HIST1H3I,HIST1H4E
GO:0071276	cellular response to cadmium ion	5	31	1.37	0.00036	9606.ENSP00000306245,9606.ENSP00000307706,9606.ENSP00000377995,9606.ENSP00000391397,9606.ENSP00000478425	FOS,MT1E,MT1X,MT1G,MT1A
GO:0016233	telomere capping	5	32	1.35	0.00039	9606.ENSP00000366956,9606.ENSP00000366974,9606.ENSP00000367034,9606.ENSP00000443017,9606.ENSP00000484789	HIST1H4H,HIST1H4B,HIST1H4C,HIST4H4,HIST1H4E
GO:0006342	chromatin silencing	7	98	1.01	0.00057	9606.ENSP00000352119,9606.ENSP00000366956,9606.ENSP00000366974,9606.ENSP00000367034,9606.ENSP00000443017,9606.ENSP00000483283,9606.ENSP00000484789	HIST1H2AG,HIST1H4H,HIST1H4B,HIST1H4C,HIST4H4,HIST1H3I,HIST1H4E
GO:0006303	double-strand break repair via nonhomologous end joining	6	66	1.12	0.00068	9606.ENSP00000360682,9606.ENSP00000366956,9606.ENSP00000366974,9606.ENSP00000367034,9606.ENSP00000443017,9606.ENSP00000484789	C9orf142,HIST1H4H,HIST1H4B,HIST1H4C,HIST4H4,HIST1H4E
GO:0045637	regulation of myeloid cell differentiation	10	249	0.76	0.00082	9606.ENSP00000306245,9606.ENSP00000366956,9606.ENSP00000366974,9606.ENSP00000367034,9606.ENSP00000368699,9606.ENSP00000380697,9606.ENSP00000443017,9606.ENSP00000469647,9606.ENSP00000483283,9606.ENSP00000484789	FOS,HIST1H4H,HIST1H4B,HIST1H4C,ISG15,IRF7,HIST4H4,ZFP36,HIST1H3I,HIST1H4E
GO:0040029	regulation of gene expression, epigenetic	10	251	0.76	0.00085	9606.ENSP00000324124,9606.ENSP00000352119,9606.ENSP00000366956,9606.ENSP00000366974,9606.ENSP00000367034,9606.ENSP00000407375,9606.ENSP00000443017,9606.ENSP00000469647,9606.ENSP00000483283,9606.ENSP00000484789	POLR2L,HIST1H2AG,HIST1H4H,HIST1H4B,HIST1H4C,GPX1,HIST4H4,ZFP36,HIST1H3I,HIST1H4E
GO:0032200	telomere organization	7	114	0.95	0.0012	9606.ENSP00000366956,9606.ENSP00000366974,9606.ENSP00000367034,9606.ENSP00000406046,9606.ENSP00000443017,9606.ENSP00000483283,9606.ENSP00000484789	HIST1H4H,HIST1H4B,HIST1H4C,POLD1,HIST4H4,HIST1H3I,HIST1H4E
GO:0045652	regulation of megakaryocyte differentiation	6	78	1.04	0.0013	9606.ENSP00000366956,9606.ENSP00000366974,9606.ENSP00000367034,9606.ENSP00000443017,9606.ENSP00000483283,9606.ENSP00000484789	HIST1H4H,HIST1H4B,HIST1H4C,HIST4H4,HIST1H3I,HIST1H4E
GO:0071248	cellular response to metal ion	8	162	0.85	0.0013	9606.ENSP00000245185,9606.ENSP00000306245,9606.ENSP00000307706,9606.ENSP00000376807,9606.ENSP00000377995,9606.ENSP00000379563,9606.ENSP00000391397,9606.ENSP00000478425	MT2A,FOS,MT1E,DPEP1,MT1X,TSPO,MT1G,MT1A
GO:0006325	chromatin organization	16	683	0.53	0.0014	9606.ENSP00000215980,9606.ENSP00000244534,9606.ENSP00000289316,9606.ENSP00000329662,9606.ENSP00000339566,9606.ENSP00000339835,9606.ENSP00000349430,9606.ENSP00000352119,9606.ENSP00000366956,9606.ENSP00000366974,9606.ENSP00000367034,9606.ENSP00000443017,9606.ENSP00000445831,9606.ENSP00000483283,9606.ENSP00000483903,9606.ENSP00000484789	CENPM,HIST1H1D,HIST1H2BD,H1FX,HIST1H1C,H3F3C,HIST1H2BK,HIST1H2AG,HIST1H4H,HIST1H4B,HIST1H4C,HIST4H4,HIST2H2BF,HIST1H3I,HIST1H2BN,HIST1H4E
GO:0051291	protein heterooligomerization	7	126	0.9	0.002	9606.ENSP00000260447,9606.ENSP00000366956,9606.ENSP00000366974,9606.ENSP00000367034,9606.ENSP00000443017,9606.ENSP00000483283,9606.ENSP00000484789	GCHFR,HIST1H4H,HIST1H4B,HIST1H4C,HIST4H4,HIST1H3I,HIST1H4E
GO:0016458	gene silencing	8	180	0.81	0.0024	9606.ENSP00000352119,9606.ENSP00000366956,9606.ENSP00000366974,9606.ENSP00000367034,9606.ENSP00000443017,9606.ENSP00000469647,9606.ENSP00000483283,9606.ENSP00000484789	HIST1H2AG,HIST1H4H,HIST1H4B,HIST1H4C,HIST4H4,ZFP36,HIST1H3I,HIST1H4E
GO:0045638	negative regulation of myeloid cell differentiation	6	93	0.97	0.003	9606.ENSP00000366956,9606.ENSP00000366974,9606.ENSP00000367034,9606.ENSP00000443017,9606.ENSP00000469647,9606.ENSP00000484789	HIST1H4H,HIST1H4B,HIST1H4C,HIST4H4,ZFP36,HIST1H4E
GO:0000723	telomere maintenance	6	101	0.93	0.0045	9606.ENSP00000366956,9606.ENSP00000366974,9606.ENSP00000367034,9606.ENSP00000406046,9606.ENSP00000443017,9606.ENSP00000484789	HIST1H4H,HIST1H4B,HIST1H4C,POLD1,HIST4H4,HIST1H4E
GO:1903707	negative regulation of hemopoiesis	7	148	0.83	0.0045	9606.ENSP00000366956,9606.ENSP00000366974,9606.ENSP00000367034,9606.ENSP00000412927,9606.ENSP00000443017,9606.ENSP00000469647,9606.ENSP00000484789	HIST1H4H,HIST1H4B,HIST1H4C,HLA-G,HIST4H4,ZFP36,HIST1H4E
GO:1903706	regulation of hemopoiesis	11	412	0.58	0.0076	9606.ENSP00000306245,9606.ENSP00000366956,9606.ENSP00000366974,9606.ENSP00000367034,9606.ENSP00000368699,9606.ENSP00000380697,9606.ENSP00000412927,9606.ENSP00000443017,9606.ENSP00000469647,9606.ENSP00000483283,9606.ENSP00000484789	FOS,HIST1H4H,HIST1H4B,HIST1H4C,ISG15,IRF7,HLA-G,HIST4H4,ZFP36,HIST1H3I,HIST1H4E
GO:0000461	endonucleolytic cleavage to generate mature 3'-end of SSU-rRNA from (SSU-rRNA, 5.8S rRNA, LSU-rRNA)	2	2	2.16	0.0121	9606.ENSP00000345957,9606.ENSP00000346067	RPS21,RPSA
GO:0006302	double-strand break repair	7	178	0.75	0.0128	9606.ENSP00000360682,9606.ENSP00000366956,9606.ENSP00000366974,9606.ENSP00000367034,9606.ENSP00000443017,9606.ENSP00000481750,9606.ENSP00000484789	C9orf142,HIST1H4H,HIST1H4B,HIST1H4C,HIST4H4,AP5S1,HIST1H4E
GO:0042776	mitochondrial ATP synthesis coupled proton transport	3	17	1.4	0.0139	9606.ENSP00000215375,9606.ENSP00000243997,9606.ENSP00000258424	ATP5D,ATP5E,COX5B
GO:0017144	drug metabolic process	13	622	0.48	0.0187	9606.ENSP00000215375,9606.ENSP00000220966,9606.ENSP00000243997,9606.ENSP00000258424,9606.ENSP00000260447,9606.ENSP00000261623,9606.ENSP00000301457,9606.ENSP00000301458,9606.ENSP00000332887,9606.ENSP00000367615,9606.ENSP00000371110,9606.ENSP00000376807,9606.ENSP00000407375	ATP5D,PYCRL,ATP5E,COX5B,GCHFR,CYBA,NDUFA7,CD320,UQCR10,APRT,GCAT,DPEP1,GPX1
GO:0051276	chromosome organization	17	999	0.39	0.0255	9606.ENSP00000215980,9606.ENSP00000244534,9606.ENSP00000289316,9606.ENSP00000329662,9606.ENSP00000339566,9606.ENSP00000339835,9606.ENSP00000349430,9606.ENSP00000352119,9606.ENSP00000366956,9606.ENSP00000366974,9606.ENSP00000367034,9606.ENSP00000406046,9606.ENSP00000443017,9606.ENSP00000445831,9606.ENSP00000483283,9606.ENSP00000483903,9606.ENSP00000484789	CENPM,HIST1H1D,HIST1H2BD,H1FX,HIST1H1C,H3F3C,HIST1H2BK,HIST1H2AG,HIST1H4H,HIST1H4B,HIST1H4C,POLD1,HIST4H4,HIST2H2BF,HIST1H3I,HIST1H2BN,HIST1H4E
GO:0071672	negative regulation of smooth muscle cell chemotaxis	2	4	1.86	0.0274	9606.ENSP00000377471,9606.ENSP00000381607	CORO1B,GSTP1
GO:0006119	oxidative phosphorylation	5	100	0.86	0.0313	9606.ENSP00000215375,9606.ENSP00000243997,9606.ENSP00000258424,9606.ENSP00000301457,9606.ENSP00000332887	ATP5D,ATP5E,COX5B,NDUFA7,UQCR10
GO:0065003	protein-containing complex assembly	22	1514	0.32	0.0313	9606.ENSP00000215980,9606.ENSP00000244534,9606.ENSP00000260447,9606.ENSP00000261623,9606.ENSP00000289316,9606.ENSP00000301457,9606.ENSP00000329662,9606.ENSP00000332887,9606.ENSP00000339566,9606.ENSP00000339835,9606.ENSP00000346067,9606.ENSP00000349430,9606.ENSP00000366956,9606.ENSP00000366974,9606.ENSP00000367034,9606.ENSP00000408005,9606.ENSP00000443017,9606.ENSP00000444433,9606.ENSP00000445831,…	CENPM,HIST1H1D,GCHFR,CYBA,HIST1H2BD,NDUFA7,H1FX,UQCR10,HIST1H1C,H3F3C,RPSA,HIST1H2BK,HIST1H4H,HIST1H4B,HIST1H4C,SLC9A3R2,HIST4H4,SCO2,HIST2H2BF,HIST1H3I,HIST1H2BN,HIST1H4E
GO:0002683	negative regulation of immune system process	10	425	0.53	0.0333	9606.ENSP00000320521,9606.ENSP00000335062,9606.ENSP00000366956,9606.ENSP00000366974,9606.ENSP00000367034,9606.ENSP00000407375,9606.ENSP00000412927,9606.ENSP00000443017,9606.ENSP00000469647,9606.ENSP00000484789	FAM3A,PDCD1,HIST1H4H,HIST1H4B,HIST1H4C,GPX1,HLA-G,HIST4H4,ZFP36,HIST1H4E
GO:0043933	protein-containing complex subunit organization	24	1770	0.29	0.0419	9606.ENSP00000215980,9606.ENSP00000244534,9606.ENSP00000260447,9606.ENSP00000261623,9606.ENSP00000289316,9606.ENSP00000301457,9606.ENSP00000323065,9606.ENSP00000329662,9606.ENSP00000332887,9606.ENSP00000339566,9606.ENSP00000339835,9606.ENSP00000346067,9606.ENSP00000347277,9606.ENSP00000349430,9606.ENSP00000366956,9606.ENSP00000366974,9606.ENSP00000367034,9606.ENSP00000408005,9606.ENSP00000443017,…	CENPM,HIST1H1D,GCHFR,CYBA,HIST1H2BD,NDUFA7,GADD45GIP1,H1FX,UQCR10,HIST1H1C,H3F3C,RPSA,MRPL52,HIST1H2BK,HIST1H4H,HIST1H4B,HIST1H4C,SLC9A3R2,HIST4H4,SCO2,HIST2H2BF,HIST1H3I,HIST1H2BN,HIST1H4E
GO:0060337	type I interferon signaling pathway	4	65	0.95	0.0438	9606.ENSP00000239938,9606.ENSP00000368699,9606.ENSP00000380697,9606.ENSP00000412927	EGR1,ISG15,IRF7,HLA-G
GO:0098532	histone H3-K27 trimethylation	2	6	1.68	0.0438	9606.ENSP00000244534,9606.ENSP00000339566	HIST1H1D,HIST1H1C
GO:0032680	regulation of tumor necrosis factor production	5	115	0.8	0.0472	9606.ENSP00000248553,9606.ENSP00000261623,9606.ENSP00000379563,9606.ENSP00000381607,9606.ENSP00000469647	HSPB1,CYBA,TSPO,GSTP1,ZFP36
GO:0043628	ncRNA 3'-end processing	3	30	1.16	0.0472	9606.ENSP00000345957,9606.ENSP00000346067,9606.ENSP00000385722	RPS21,RPSA,INTS1
GO:0045926	negative regulation of growth	7	235	0.63	0.0472	9606.ENSP00000043402,9606.ENSP00000245185,9606.ENSP00000252809,9606.ENSP00000307706,9606.ENSP00000377995,9606.ENSP00000391397,9606.ENSP00000478425	RTN4R,MT2A,GDF15,MT1E,MT1X,MT1G,MT1A

## Sheet: Vir_vs_Coinfection_24_up_KEGG
Supplementary table S10: Results from the Gene Ontology (GO) analysis in the category for biological process complete (GObp) and Pathway Enrichment (KEGG pathways) from single infections compared to co-infected cells at both 24 and 72 hpi.
NOTE-Because of low number of genes no biological pathways were identified

## Sheet: Vir_vs_Coinfection_24_Down_KEGG
Supplementary table S10: Results from the Gene Ontology (GO) analysis in the category for biological process complete (GObp) and Pathway Enrichment (KEGG pathways) from single infections compared to co-infected cells at both 24 and 72 hpi.
#term ID	term description	observed gene count	background gene count	strength	false discovery rate	matching proteins in your network (IDs)	matching proteins in your network (labels)
hsa04978	Mineral absorption	5	51	1.15	0.0049	9606.ENSP00000245185,9606.ENSP00000307706,9606.ENSP00000377995,9606.ENSP00000391397,9606.ENSP00000478425	MT2A,MT1E,MT1X,MT1G,MT1A
hsa05203	Viral carcinogenesis	8	183	0.8	0.0049	9606.ENSP00000261303,9606.ENSP00000289316,9606.ENSP00000349430,9606.ENSP00000380697,9606.ENSP00000412927,9606.ENSP00000445831,9606.ENSP00000483903,9606.ENSP00000484789	PSMC1,HIST1H2BD,HIST1H2BK,IRF7,HLA-G,HIST2H2BF,HIST1H2BN,HIST1H4E
hsa05322	Systemic lupus erythematosus	6	94	0.96	0.0049	9606.ENSP00000289316,9606.ENSP00000339835,9606.ENSP00000349430,9606.ENSP00000445831,9606.ENSP00000483903,9606.ENSP00000484789	HIST1H2BD,H3F3C,HIST1H2BK,HIST2H2BF,HIST1H2BN,HIST1H4E
hsa05016	Huntington's disease	7	193	0.72	0.0142	9606.ENSP00000215375,9606.ENSP00000243997,9606.ENSP00000258424,9606.ENSP00000301457,9606.ENSP00000324124,9606.ENSP00000332887,9606.ENSP00000407375	ATP5D,ATP5E,COX5B,NDUFA7,POLR2L,UQCR10,GPX1
hsa05034	Alcoholism	6	142	0.78	0.0142	9606.ENSP00000289316,9606.ENSP00000339835,9606.ENSP00000349430,9606.ENSP00000445831,9606.ENSP00000483903,9606.ENSP00000484789	HIST1H2BD,H3F3C,HIST1H2BK,HIST2H2BF,HIST1H2BN,HIST1H4E
hsa05010	Alzheimer's disease	6	168	0.71	0.0259	9606.ENSP00000215375,9606.ENSP00000243997,9606.ENSP00000258424,9606.ENSP00000301457,9606.ENSP00000332887,9606.ENSP00000431984	ATP5D,ATP5E,COX5B,NDUFA7,UQCR10,CAPN1
hsa00190	Oxidative phosphorylation	5	131	0.74	0.0425	9606.ENSP00000215375,9606.ENSP00000243997,9606.ENSP00000258424,9606.ENSP00000301457,9606.ENSP00000332887	ATP5D,ATP5E,COX5B,NDUFA7,UQCR10

## Sheet: Par_vs_Coinfection_72_up_Bio_PW
Supplementary table S10: Results from the Gene Ontology (GO) analysis in the category for biological process complete (GObp) and Pathway Enrichment (KEGG pathways) from single infections compared to co-infected cells at both 24 and 72 hpi.
#term ID	term description	observed gene count	background gene count	strength	false discovery rate	matching proteins in your network (IDs)	matching proteins in your network (labels)
GO:0031323	regulation of cellular metabolic process	769	6082	0.16	1.94e-26	9606.ENSP00000013125,9606.ENSP00000014914,9606.ENSP00000054650,9606.ENSP00000157600,9606.ENSP00000157812,9606.ENSP00000158771,9606.ENSP00000166139,9606.ENSP00000171111,9606.ENSP00000179259,9606.ENSP00000185150,9606.ENSP00000196489,9606.ENSP00000198767,9606.ENSP00000199320,9606.ENSP00000200453,9606.ENSP00000209728,9606.ENSP00000211936,9606.ENSP00000212015,9606.ENSP00000215631,9606.ENSP00000216037,…	MAP4K5,GPRC5A,THAP3,LMCD1,PSMC4,DERL2,FSTL3,KEAP1,C12orf5,ERLEC1,ZNF416,RRN3,DIMT1,PPP1R15A,CDC6,ZNF184,SIRT1,GADD45B,XBP1,HMOX1,PHF5A,SNAPC1,ALKBH1,NFKBIA,CHMP4B,PSMD10,GLA,EHD4,GABPB1,BRF2,RIPK2,RELB,SGTA,ERF,NAMPT,SERPINE1,CHMP5,SETX,PPIF,RASD1,NFKB1,PRDM4,CSRNP2,CYP27B1,GCLC,MDFI,GUCA1B,HBEGF,TUSC2,PCGF1,ODC1,CEBPZ,DLX2,MSH6,PRDM2,RGS2,TBPL1,ELL2,ATAD2B,DUSP1,ELF1,BHLHE41,ZNF442,ORMDL2,SNAI1,…
GO:0019222	regulation of metabolic process	804	6516	0.15	1.69e-25	9606.ENSP00000013125,9606.ENSP00000014914,9606.ENSP00000054650,9606.ENSP00000157600,9606.ENSP00000157812,9606.ENSP00000158771,9606.ENSP00000166139,9606.ENSP00000171111,9606.ENSP00000179259,9606.ENSP00000185150,9606.ENSP00000196489,9606.ENSP00000198767,9606.ENSP00000199320,9606.ENSP00000200453,9606.ENSP00000209728,9606.ENSP00000211936,9606.ENSP00000212015,9606.ENSP00000215631,9606.ENSP00000216037,…	MAP4K5,GPRC5A,THAP3,LMCD1,PSMC4,DERL2,FSTL3,KEAP1,C12orf5,ERLEC1,ZNF416,RRN3,DIMT1,PPP1R15A,CDC6,ZNF184,SIRT1,GADD45B,XBP1,HMOX1,PHF5A,SNAPC1,ALKBH1,NFKBIA,CHMP4B,PSMD10,GLA,EHD4,GABPB1,BRF2,RIPK2,RELB,SGTA,ERF,NAMPT,SERPINE1,CHMP5,SETX,PPIF,RASD1,NFKB1,PRDM4,CSRNP2,CYP27B1,GCLC,MDFI,GUCA1B,HBEGF,TUSC2,PCGF1,ODC1,CEBPZ,DLX2,MSH6,PRDM2,RGS2,TBPL1,ELL2,ATAD2B,DUSP1,ELF1,BHLHE41,ZNF442,ORMDL2,SNAI1,…
GO:0044260	cellular macromolecule metabolic process	795	6413	0.15	1.69e-25	9606.ENSP00000013125,9606.ENSP00000035307,9606.ENSP00000053468,9606.ENSP00000157600,9606.ENSP00000157812,9606.ENSP00000158771,9606.ENSP00000166139,9606.ENSP00000171111,9606.ENSP00000185150,9606.ENSP00000196489,9606.ENSP00000198767,9606.ENSP00000199320,9606.ENSP00000200453,9606.ENSP00000209728,9606.ENSP00000211936,9606.ENSP00000212015,9606.ENSP00000215904,9606.ENSP00000216037,9606.ENSP00000216039,…	MAP4K5,CHPF2,MRPS10,LMCD1,PSMC4,DERL2,FSTL3,KEAP1,ERLEC1,ZNF416,RRN3,DIMT1,PPP1R15A,CDC6,ZNF184,SIRT1,PDXP,XBP1,JOSD1,PHF5A,SNAPC1,ALKBH1,NFKBIA,CSTF1,CHMP4B,PSMD10,PSMD7,GABPB1,BRF2,RIPK2,RELB,SGTA,ERF,FKBP14,SETX,PPIF,NFKB1,PRDM4,CSRNP2,FGFR1OP2,HARS2,HBEGF,KLHL18,PCGF1,CEBPZ,DLX2,MSH6,PRDM2,TBPL1,FBXO30,RNF103,STBD1,ELL2,DUSP1,ELF1,ALG5,RNF11,BHLHE41,ZNF442,EREG,IRF1,FOSB,PLAGL2,NR1D1,WNK4,SDF…
GO:0051171	regulation of nitrogen compound metabolic process	738	5827	0.16	1.69e-25	9606.ENSP00000013125,9606.ENSP00000014914,9606.ENSP00000054650,9606.ENSP00000157600,9606.ENSP00000157812,9606.ENSP00000158771,9606.ENSP00000166139,9606.ENSP00000171111,9606.ENSP00000179259,9606.ENSP00000185150,9606.ENSP00000196489,9606.ENSP00000198767,9606.ENSP00000199320,9606.ENSP00000200453,9606.ENSP00000209728,9606.ENSP00000211936,9606.ENSP00000212015,9606.ENSP00000215631,9606.ENSP00000216037,…	MAP4K5,GPRC5A,THAP3,LMCD1,PSMC4,DERL2,FSTL3,KEAP1,C12orf5,ERLEC1,ZNF416,RRN3,DIMT1,PPP1R15A,CDC6,ZNF184,SIRT1,GADD45B,XBP1,HMOX1,PHF5A,SNAPC1,ALKBH1,NFKBIA,PSMD10,GLA,EHD4,GABPB1,BRF2,RIPK2,RELB,SGTA,ERF,NAMPT,SERPINE1,SETX,PPIF,RASD1,NFKB1,PRDM4,CSRNP2,GCLC,MDFI,GUCA1B,HBEGF,PCGF1,ODC1,CEBPZ,DLX2,MSH6,PRDM2,RGS2,TBPL1,ELL2,ATAD2B,DUSP1,ELF1,BHLHE41,ZNF442,ORMDL2,SNAI1,EREG,IRF1,INSIG2,FOSB,PLAGL…
GO:0080090	regulation of primary metabolic process	753	5982	0.16	1.69e-25	9606.ENSP00000013125,9606.ENSP00000014914,9606.ENSP00000054650,9606.ENSP00000157600,9606.ENSP00000157812,9606.ENSP00000158771,9606.ENSP00000166139,9606.ENSP00000171111,9606.ENSP00000179259,9606.ENSP00000185150,9606.ENSP00000196489,9606.ENSP00000198767,9606.ENSP00000199320,9606.ENSP00000200453,9606.ENSP00000209728,9606.ENSP00000211936,9606.ENSP00000212015,9606.ENSP00000215631,9606.ENSP00000216037,…	MAP4K5,GPRC5A,THAP3,LMCD1,PSMC4,DERL2,FSTL3,KEAP1,C12orf5,ERLEC1,ZNF416,RRN3,DIMT1,PPP1R15A,CDC6,ZNF184,SIRT1,GADD45B,XBP1,HMOX1,PHF5A,SNAPC1,ALKBH1,NFKBIA,PSMD10,EHD4,GABPB1,BRF2,RIPK2,RELB,SGTA,ERF,NAMPT,SERPINE1,SETX,PPIF,RASD1,NFKB1,PRDM4,CSRNP2,CYP27B1,GCLC,MDFI,GUCA1B,HBEGF,PCGF1,ODC1,CEBPZ,DLX2,MSH6,PRDM2,RGS2,TBPL1,ELL2,ATAD2B,DUSP1,ELF1,BHLHE41,ZNF442,ORMDL2,SNAI1,EREG,IRF1,INSIG2,FOSB,P…
GO:0043170	macromolecule metabolic process	886	7453	0.13	8.94e-25	9606.ENSP00000013125,9606.ENSP00000035307,9606.ENSP00000053468,9606.ENSP00000157600,9606.ENSP00000157812,9606.ENSP00000158771,9606.ENSP00000161006,9606.ENSP00000166139,9606.ENSP00000170168,9606.ENSP00000171111,9606.ENSP00000185150,9606.ENSP00000196489,9606.ENSP00000198767,9606.ENSP00000199320,9606.ENSP00000200453,9606.ENSP00000209728,9606.ENSP00000211936,9606.ENSP00000212015,9606.ENSP00000215904,…	MAP4K5,CHPF2,MRPS10,LMCD1,PSMC4,DERL2,PRSS22,FSTL3,REXO1,KEAP1,ERLEC1,ZNF416,RRN3,DIMT1,PPP1R15A,CDC6,ZNF184,SIRT1,PDXP,XBP1,RTCB,JOSD1,PHF5A,SNAPC1,ALKBH1,NFKBIA,CSTF1,CHMP4B,PSMD10,PSMD7,GABPB1,BRF2,RIPK2,RELB,SGTA,ERF,FKBP14,SETX,PPIF,NFKB1,PRDM4,CSRNP2,FGFR1OP2,BYSL,HARS2,HBEGF,KLHL18,PCGF1,CEBPZ,DLX2,MSH6,PRDM2,TBPL1,FBXO30,RNF103,STBD1,ELL2,DDX55,DUSP1,ELF1,ALG5,RNF11,BHLHE41,ZNF442,MPHOSPH…
GO:0009889	regulation of biosynthetic process	583	4337	0.19	7.88e-24	9606.ENSP00000054650,9606.ENSP00000157600,9606.ENSP00000157812,9606.ENSP00000166139,9606.ENSP00000171111,9606.ENSP00000179259,9606.ENSP00000196489,9606.ENSP00000198767,9606.ENSP00000200453,9606.ENSP00000209728,9606.ENSP00000211936,9606.ENSP00000212015,9606.ENSP00000216037,9606.ENSP00000216117,9606.ENSP00000216252,9606.ENSP00000216294,9606.ENSP00000216489,9606.ENSP00000216797,9606.ENSP00000217958,…	THAP3,LMCD1,PSMC4,FSTL3,KEAP1,C12orf5,ZNF416,RRN3,PPP1R15A,CDC6,ZNF184,SIRT1,XBP1,HMOX1,PHF5A,SNAPC1,ALKBH1,NFKBIA,PSMD10,GLA,GABPB1,BRF2,RIPK2,RELB,ERF,NAMPT,SERPINE1,SETX,RASD1,NFKB1,PRDM4,CSRNP2,CYP27B1,GCLC,MDFI,GUCA1B,HBEGF,PCGF1,CEBPZ,DLX2,PRDM2,RGS2,TBPL1,ELL2,ATAD2B,DUSP1,ELF1,BHLHE41,ZNF442,ORMDL2,SNAI1,EREG,IRF1,INSIG2,FOSB,PLAGL2,NR1D1,ZNF317,ZNF10,TICAM1,LIF,DLL4,FXR2,EAPP,EGLN3,MKNK2…
GO:0044237	cellular metabolic process	1001	8797	0.11	9.2e-24	9606.ENSP00000009041,9606.ENSP00000013125,9606.ENSP00000035307,9606.ENSP00000053468,9606.ENSP00000075120,9606.ENSP00000157600,9606.ENSP00000157812,9606.ENSP00000158771,9606.ENSP00000166139,9606.ENSP00000170168,9606.ENSP00000171111,9606.ENSP00000179259,9606.ENSP00000185150,9606.ENSP00000196489,9606.ENSP00000198767,9606.ENSP00000199320,9606.ENSP00000200453,9606.ENSP00000209728,9606.ENSP00000210444,…	STARD3NL,MAP4K5,CHPF2,MRPS10,SLC2A3,LMCD1,PSMC4,DERL2,FSTL3,REXO1,KEAP1,C12orf5,ERLEC1,ZNF416,RRN3,DIMT1,PPP1R15A,CDC6,NANS,ZNF184,SIRT1,PDXP,XBP1,RTCB,JOSD1,HMOX1,PHF5A,SNAPC1,ALKBH1,NFKBIA,CSTF1,CHMP4B,PSMD10,GLA,PSMD7,GABPB1,VPS18,BRF2,RIPK2,GSR,DHDH,RELB,SGTA,ERF,NAMPT,FKBP14,CYP3A5,SETX,PPIF,NFKB1,PDHX,PRDM4,CSRNP2,CYP27B1,FGFR1OP2,GCLC,BYSL,HARS2,HBEGF,BNIP1,KLHL18,PCGF1,ODC1,CEBPZ,DLX2,MSH…
GO:0060255	regulation of macromolecule metabolic process	752	6072	0.15	9.64e-24	9606.ENSP00000013125,9606.ENSP00000014914,9606.ENSP00000054650,9606.ENSP00000157600,9606.ENSP00000157812,9606.ENSP00000158771,9606.ENSP00000166139,9606.ENSP00000171111,9606.ENSP00000179259,9606.ENSP00000185150,9606.ENSP00000196489,9606.ENSP00000198767,9606.ENSP00000199320,9606.ENSP00000200453,9606.ENSP00000209728,9606.ENSP00000211936,9606.ENSP00000212015,9606.ENSP00000215631,9606.ENSP00000216037,…	MAP4K5,GPRC5A,THAP3,LMCD1,PSMC4,DERL2,FSTL3,KEAP1,C12orf5,ERLEC1,ZNF416,RRN3,DIMT1,PPP1R15A,CDC6,ZNF184,SIRT1,GADD45B,XBP1,HMOX1,PHF5A,SNAPC1,ALKBH1,NFKBIA,PSMD10,EHD4,GABPB1,BRF2,RIPK2,RELB,SGTA,ERF,NAMPT,SERPINE1,CHMP5,SETX,RASD1,NFKB1,PRDM4,CSRNP2,GCLC,MDFI,HBEGF,PCGF1,ODC1,CEBPZ,DLX2,MSH6,PRDM2,RGS2,TBPL1,ELL2,ATAD2B,DUSP1,ELF1,BHLHE41,ZNF442,ORMDL2,SNAI1,EREG,IRF1,INSIG2,FOSB,PLAGL2,NR1D1,ZN…
GO:0031326	regulation of cellular biosynthetic process	574	4266	0.19	1.47e-23	9606.ENSP00000054650,9606.ENSP00000157600,9606.ENSP00000157812,9606.ENSP00000166139,9606.ENSP00000171111,9606.ENSP00000179259,9606.ENSP00000196489,9606.ENSP00000198767,9606.ENSP00000200453,9606.ENSP00000209728,9606.ENSP00000211936,9606.ENSP00000212015,9606.ENSP00000216037,9606.ENSP00000216117,9606.ENSP00000216252,9606.ENSP00000216294,9606.ENSP00000216489,9606.ENSP00000216797,9606.ENSP00000217958,…	THAP3,LMCD1,PSMC4,FSTL3,KEAP1,C12orf5,ZNF416,RRN3,PPP1R15A,CDC6,ZNF184,SIRT1,XBP1,HMOX1,PHF5A,SNAPC1,ALKBH1,NFKBIA,PSMD10,GLA,GABPB1,BRF2,RIPK2,RELB,ERF,NAMPT,SERPINE1,SETX,RASD1,NFKB1,PRDM4,CSRNP2,CYP27B1,GCLC,MDFI,GUCA1B,HBEGF,PCGF1,CEBPZ,DLX2,PRDM2,RGS2,TBPL1,ELL2,ATAD2B,DUSP1,ELF1,BHLHE41,ZNF442,ORMDL2,SNAI1,EREG,IRF1,INSIG2,FOSB,PLAGL2,NR1D1,ZNF317,ZNF10,TICAM1,LIF,DLL4,FXR2,EAPP,EGLN3,MKNK2…
GO:0019219	regulation of nucleobase-containing compound metabolic process	557	4133	0.19	8.73e-23	9606.ENSP00000054650,9606.ENSP00000157600,9606.ENSP00000157812,9606.ENSP00000166139,9606.ENSP00000171111,9606.ENSP00000179259,9606.ENSP00000196489,9606.ENSP00000198767,9606.ENSP00000199320,9606.ENSP00000209728,9606.ENSP00000211936,9606.ENSP00000212015,9606.ENSP00000216037,9606.ENSP00000216117,9606.ENSP00000216252,9606.ENSP00000216294,9606.ENSP00000216797,9606.ENSP00000217958,9606.ENSP00000220429,…	THAP3,LMCD1,PSMC4,FSTL3,KEAP1,C12orf5,ZNF416,RRN3,DIMT1,CDC6,ZNF184,SIRT1,XBP1,HMOX1,PHF5A,SNAPC1,NFKBIA,PSMD10,GABPB1,BRF2,RIPK2,RELB,ERF,NAMPT,SERPINE1,SETX,PPIF,RASD1,NFKB1,PRDM4,CSRNP2,GCLC,MDFI,GUCA1B,PCGF1,CEBPZ,DLX2,MSH6,PRDM2,TBPL1,ELL2,ATAD2B,DUSP1,ELF1,BHLHE41,ZNF442,SNAI1,EREG,IRF1,INSIG2,FOSB,PLAGL2,NR1D1,ZNF317,ZNF10,TICAM1,LIF,DLL4,EAPP,EGLN3,PBX4,RAF1,MED17,SAFB2,GDF15,JUND,SESN2,P…
GO:0051252	regulation of RNA metabolic process	532	3890	0.19	8.73e-23	9606.ENSP00000054650,9606.ENSP00000157600,9606.ENSP00000157812,9606.ENSP00000166139,9606.ENSP00000171111,9606.ENSP00000196489,9606.ENSP00000198767,9606.ENSP00000199320,9606.ENSP00000209728,9606.ENSP00000211936,9606.ENSP00000212015,9606.ENSP00000216037,9606.ENSP00000216117,9606.ENSP00000216252,9606.ENSP00000216294,9606.ENSP00000216797,9606.ENSP00000217958,9606.ENSP00000220429,9606.ENSP00000220659,…	THAP3,LMCD1,PSMC4,FSTL3,KEAP1,ZNF416,RRN3,DIMT1,CDC6,ZNF184,SIRT1,XBP1,HMOX1,PHF5A,SNAPC1,NFKBIA,PSMD10,GABPB1,BRF2,RIPK2,RELB,ERF,NAMPT,SERPINE1,SETX,RASD1,NFKB1,PRDM4,CSRNP2,GCLC,MDFI,PCGF1,CEBPZ,DLX2,PRDM2,TBPL1,ELL2,ATAD2B,ELF1,BHLHE41,ZNF442,SNAI1,EREG,IRF1,INSIG2,FOSB,PLAGL2,NR1D1,ZNF317,ZNF10,TICAM1,LIF,DLL4,EAPP,EGLN3,PBX4,RAF1,MED17,SAFB2,GDF15,JUND,SESN2,PPIL4,THAP1,DNAJB1,RRP8,H3F3B,KD…
GO:0010556	regulation of macromolecule biosynthetic process	555	4143	0.18	3.67e-22	9606.ENSP00000054650,9606.ENSP00000157600,9606.ENSP00000157812,9606.ENSP00000166139,9606.ENSP00000171111,9606.ENSP00000196489,9606.ENSP00000198767,9606.ENSP00000200453,9606.ENSP00000209728,9606.ENSP00000211936,9606.ENSP00000212015,9606.ENSP00000216037,9606.ENSP00000216117,9606.ENSP00000216252,9606.ENSP00000216294,9606.ENSP00000216489,9606.ENSP00000216797,9606.ENSP00000217958,9606.ENSP00000220429,…	THAP3,LMCD1,PSMC4,FSTL3,KEAP1,ZNF416,RRN3,PPP1R15A,CDC6,ZNF184,SIRT1,XBP1,HMOX1,PHF5A,SNAPC1,ALKBH1,NFKBIA,PSMD10,GABPB1,BRF2,RIPK2,RELB,ERF,NAMPT,SERPINE1,SETX,RASD1,NFKB1,PRDM4,CSRNP2,GCLC,MDFI,HBEGF,PCGF1,CEBPZ,DLX2,PRDM2,RGS2,TBPL1,ELL2,ATAD2B,DUSP1,ELF1,BHLHE41,ZNF442,ORMDL2,SNAI1,EREG,IRF1,INSIG2,FOSB,PLAGL2,NR1D1,ZNF317,ZNF10,TICAM1,LIF,DLL4,FXR2,EAPP,EGLN3,MKNK2,PBX4,RAF1,MED17,SAFB2,GDF1…
GO:0010468	regulation of gene expression	591	4533	0.17	1.83e-21	9606.ENSP00000054650,9606.ENSP00000157600,9606.ENSP00000157812,9606.ENSP00000166139,9606.ENSP00000171111,9606.ENSP00000196489,9606.ENSP00000198767,9606.ENSP00000199320,9606.ENSP00000200453,9606.ENSP00000209728,9606.ENSP00000211936,9606.ENSP00000212015,9606.ENSP00000216037,9606.ENSP00000216117,9606.ENSP00000216252,9606.ENSP00000216294,9606.ENSP00000216489,9606.ENSP00000216797,9606.ENSP00000217958,…	THAP3,LMCD1,PSMC4,FSTL3,KEAP1,ZNF416,RRN3,DIMT1,PPP1R15A,CDC6,ZNF184,SIRT1,XBP1,HMOX1,PHF5A,SNAPC1,ALKBH1,NFKBIA,PSMD10,GABPB1,BRF2,RIPK2,RELB,ERF,NAMPT,SERPINE1,SETX,RASD1,NFKB1,PRDM4,CSRNP2,GCLC,MDFI,PCGF1,CEBPZ,DLX2,PRDM2,RGS2,TBPL1,ELL2,ATAD2B,ELF1,BHLHE41,ZNF442,SNAI1,EREG,IRF1,INSIG2,FOSB,PLAGL2,NR1D1,ZNF317,ZNF10,TICAM1,LIF,DLL4,FXR2,EAPP,EGLN3,MKNK2,PBX4,RAF1,MED17,SAFB2,GDF15,JUND,SESN2,…
GO:1903506	regulation of nucleic acid-templated transcription	504	3683	0.19	2.52e-21	9606.ENSP00000054650,9606.ENSP00000157600,9606.ENSP00000157812,9606.ENSP00000166139,9606.ENSP00000171111,9606.ENSP00000196489,9606.ENSP00000198767,9606.ENSP00000209728,9606.ENSP00000211936,9606.ENSP00000212015,9606.ENSP00000216037,9606.ENSP00000216117,9606.ENSP00000216252,9606.ENSP00000216294,9606.ENSP00000216797,9606.ENSP00000217958,9606.ENSP00000220429,9606.ENSP00000220659,9606.ENSP00000220751,…	THAP3,LMCD1,PSMC4,FSTL3,KEAP1,ZNF416,RRN3,CDC6,ZNF184,SIRT1,XBP1,HMOX1,PHF5A,SNAPC1,NFKBIA,PSMD10,GABPB1,BRF2,RIPK2,RELB,ERF,NAMPT,SERPINE1,SETX,RASD1,NFKB1,PRDM4,CSRNP2,GCLC,MDFI,PCGF1,CEBPZ,DLX2,PRDM2,TBPL1,ELL2,ATAD2B,ELF1,BHLHE41,ZNF442,SNAI1,EREG,IRF1,INSIG2,FOSB,PLAGL2,NR1D1,ZNF317,ZNF10,TICAM1,LIF,DLL4,EAPP,EGLN3,PBX4,RAF1,MED17,SAFB2,GDF15,JUND,SESN2,PPIL4,THAP1,DNAJB1,RRP8,H3F3B,KDM6B,IG…
GO:2000112	regulation of cellular macromolecule biosynthetic process	541	4050	0.18	3.24e-21	9606.ENSP00000054650,9606.ENSP00000157600,9606.ENSP00000157812,9606.ENSP00000166139,9606.ENSP00000171111,9606.ENSP00000196489,9606.ENSP00000198767,9606.ENSP00000200453,9606.ENSP00000209728,9606.ENSP00000211936,9606.ENSP00000212015,9606.ENSP00000216037,9606.ENSP00000216117,9606.ENSP00000216252,9606.ENSP00000216294,9606.ENSP00000216489,9606.ENSP00000216797,9606.ENSP00000217958,9606.ENSP00000220429,…	THAP3,LMCD1,PSMC4,FSTL3,KEAP1,ZNF416,RRN3,PPP1R15A,CDC6,ZNF184,SIRT1,XBP1,HMOX1,PHF5A,SNAPC1,ALKBH1,NFKBIA,PSMD10,GABPB1,BRF2,RIPK2,RELB,ERF,NAMPT,SERPINE1,SETX,RASD1,NFKB1,PRDM4,CSRNP2,GCLC,MDFI,HBEGF,PCGF1,CEBPZ,DLX2,PRDM2,RGS2,TBPL1,ELL2,ATAD2B,DUSP1,ELF1,BHLHE41,ZNF442,SNAI1,EREG,IRF1,INSIG2,FOSB,PLAGL2,NR1D1,ZNF317,ZNF10,TICAM1,LIF,DLL4,FXR2,EAPP,EGLN3,MKNK2,PBX4,RAF1,MED17,SAFB2,GDF15,JUND,…
GO:0006355	regulation of transcription, DNA-templated	497	3661	0.19	2.56e-20	9606.ENSP00000054650,9606.ENSP00000157600,9606.ENSP00000157812,9606.ENSP00000166139,9606.ENSP00000171111,9606.ENSP00000196489,9606.ENSP00000198767,9606.ENSP00000209728,9606.ENSP00000211936,9606.ENSP00000212015,9606.ENSP00000216037,9606.ENSP00000216117,9606.ENSP00000216252,9606.ENSP00000216294,9606.ENSP00000216797,9606.ENSP00000217958,9606.ENSP00000220429,9606.ENSP00000220659,9606.ENSP00000220751,…	THAP3,LMCD1,PSMC4,FSTL3,KEAP1,ZNF416,RRN3,CDC6,ZNF184,SIRT1,XBP1,HMOX1,PHF5A,SNAPC1,NFKBIA,PSMD10,GABPB1,BRF2,RIPK2,RELB,ERF,NAMPT,SERPINE1,SETX,RASD1,NFKB1,PRDM4,CSRNP2,GCLC,MDFI,PCGF1,CEBPZ,DLX2,PRDM2,TBPL1,ELL2,ATAD2B,ELF1,BHLHE41,ZNF442,SNAI1,EREG,IRF1,INSIG2,FOSB,PLAGL2,NR1D1,ZNF317,ZNF10,TICAM1,LIF,DLL4,EAPP,EGLN3,PBX4,RAF1,MED17,SAFB2,GDF15,JUND,SESN2,PPIL4,THAP1,DNAJB1,RRP8,H3F3B,KDM6B,IG…
GO:0006807	nitrogen compound metabolic process	942	8349	0.11	4.12e-20	9606.ENSP00000013125,9606.ENSP00000035307,9606.ENSP00000053468,9606.ENSP00000157600,9606.ENSP00000157812,9606.ENSP00000158771,9606.ENSP00000161006,9606.ENSP00000166139,9606.ENSP00000170168,9606.ENSP00000171111,9606.ENSP00000185150,9606.ENSP00000196489,9606.ENSP00000198767,9606.ENSP00000199320,9606.ENSP00000200453,9606.ENSP00000209728,9606.ENSP00000210444,9606.ENSP00000211936,9606.ENSP00000212015,…	MAP4K5,CHPF2,MRPS10,LMCD1,PSMC4,DERL2,PRSS22,FSTL3,REXO1,KEAP1,ERLEC1,ZNF416,RRN3,DIMT1,PPP1R15A,CDC6,NANS,ZNF184,SIRT1,PDXP,XBP1,RTCB,JOSD1,HMOX1,PHF5A,SNAPC1,ALKBH1,NFKBIA,CSTF1,CHMP4B,PSMD10,GLA,PSMD7,GABPB1,BRF2,RIPK2,GSR,RELB,SGTA,ERF,NAMPT,FKBP14,CYP3A5,SETX,PPIF,NFKB1,PDHX,PRDM4,CSRNP2,FGFR1OP2,GCLC,BYSL,HARS2,HBEGF,KLHL18,PCGF1,ODC1,CEBPZ,DLX2,MSH6,PRDM2,SLC19A2,TBPL1,FBXO30,RNF103,ABCG2,…
GO:0008152	metabolic process	1047	9569	0.1	9.15e-20	9606.ENSP00000009041,9606.ENSP00000013125,9606.ENSP00000035307,9606.ENSP00000053468,9606.ENSP00000075120,9606.ENSP00000157600,9606.ENSP00000157812,9606.ENSP00000158771,9606.ENSP00000161006,9606.ENSP00000166139,9606.ENSP00000170168,9606.ENSP00000171111,9606.ENSP00000179259,9606.ENSP00000185150,9606.ENSP00000196489,9606.ENSP00000198767,9606.ENSP00000199320,9606.ENSP00000200453,9606.ENSP00000209728,…	STARD3NL,MAP4K5,CHPF2,MRPS10,SLC2A3,LMCD1,PSMC4,DERL2,PRSS22,FSTL3,REXO1,KEAP1,C12orf5,ERLEC1,ZNF416,RRN3,DIMT1,PPP1R15A,CDC6,NANS,ZNF184,SIRT1,PDXP,XBP1,RTCB,JOSD1,HMOX1,PHF5A,SNAPC1,ALKBH1,NFKBIA,CSTF1,CHMP4B,PSMD10,GLA,PSMD7,GABPB1,VPS18,BRF2,RIPK2,GSR,DHDH,RELB,SGTA,ERF,NAMPT,FKBP14,CYP3A5,SETX,PPIF,NFKB1,PDHX,PRDM4,CSRNP2,CYP27B1,FGFR1OP2,GCLC,BYSL,HARS2,HBEGF,BNIP1,KLHL18,PCGF1,ODC1,CEBPZ,D…
GO:0071704	organic substance metabolic process	1008	9135	0.1	1.61e-19	9606.ENSP00000009041,9606.ENSP00000013125,9606.ENSP00000035307,9606.ENSP00000053468,9606.ENSP00000075120,9606.ENSP00000157600,9606.ENSP00000157812,9606.ENSP00000158771,9606.ENSP00000161006,9606.ENSP00000166139,9606.ENSP00000170168,9606.ENSP00000171111,9606.ENSP00000179259,9606.ENSP00000185150,9606.ENSP00000196489,9606.ENSP00000198767,9606.ENSP00000199320,9606.ENSP00000200453,9606.ENSP00000209728,…	STARD3NL,MAP4K5,CHPF2,MRPS10,SLC2A3,LMCD1,PSMC4,DERL2,PRSS22,FSTL3,REXO1,KEAP1,C12orf5,ERLEC1,ZNF416,RRN3,DIMT1,PPP1R15A,CDC6,NANS,ZNF184,SIRT1,PDXP,XBP1,RTCB,JOSD1,HMOX1,PHF5A,SNAPC1,ALKBH1,NFKBIA,CSTF1,CHMP4B,PSMD10,GLA,PSMD7,GABPB1,BRF2,RIPK2,GSR,DHDH,RELB,SGTA,ERF,NAMPT,FKBP14,CYP3A5,SETX,PPIF,NFKB1,PDHX,PRDM4,CSRNP2,CYP27B1,FGFR1OP2,GCLC,BYSL,HARS2,HBEGF,KLHL18,PCGF1,ODC1,CEBPZ,DLX2,MSH6,PRD…
GO:0016070	RNA metabolic process	466	3430	0.19	8.41e-19	9606.ENSP00000157600,9606.ENSP00000166139,9606.ENSP00000171111,9606.ENSP00000196489,9606.ENSP00000198767,9606.ENSP00000199320,9606.ENSP00000211936,9606.ENSP00000212015,9606.ENSP00000216037,9606.ENSP00000216038,9606.ENSP00000216252,9606.ENSP00000216294,9606.ENSP00000216489,9606.ENSP00000217109,9606.ENSP00000220429,9606.ENSP00000220659,9606.ENSP00000221452,9606.ENSP00000222329,9606.ENSP00000224140,…	LMCD1,FSTL3,KEAP1,ZNF416,RRN3,DIMT1,ZNF184,SIRT1,XBP1,RTCB,PHF5A,SNAPC1,ALKBH1,CSTF1,GABPB1,BRF2,RELB,ERF,SETX,NFKB1,PRDM4,CSRNP2,BYSL,HARS2,PCGF1,CEBPZ,DLX2,PRDM2,TBPL1,ELL2,DDX55,ELF1,BHLHE41,ZNF442,MPHOSPH10,EREG,IRF1,FOSB,PLAGL2,NR1D1,ZNF317,ZNF10,PBX4,DHX29,MED17,SAFB2,JUND,ZCCHC9,THAP1,RRP8,IGHMBP2,MED10,CCDC59,ELP3,MBD2,BHLHE40,PRPF38A,BACH2,AKIRIN2,TBRG4,PREB,ZNF430,UTP6,LHX5,TRIM37,ACIN1…
GO:0010467	gene expression	495	3733	0.18	2.4e-18	9606.ENSP00000053468,9606.ENSP00000157600,9606.ENSP00000166139,9606.ENSP00000171111,9606.ENSP00000196489,9606.ENSP00000198767,9606.ENSP00000199320,9606.ENSP00000211936,9606.ENSP00000212015,9606.ENSP00000216037,9606.ENSP00000216038,9606.ENSP00000216252,9606.ENSP00000216294,9606.ENSP00000216489,9606.ENSP00000217109,9606.ENSP00000220429,9606.ENSP00000220659,9606.ENSP00000220751,9606.ENSP00000221452,…	MRPS10,LMCD1,FSTL3,KEAP1,ZNF416,RRN3,DIMT1,ZNF184,SIRT1,XBP1,RTCB,PHF5A,SNAPC1,ALKBH1,CSTF1,GABPB1,BRF2,RIPK2,RELB,ERF,SETX,NFKB1,PRDM4,CSRNP2,BYSL,HARS2,PCGF1,CEBPZ,DLX2,PRDM2,TBPL1,ELL2,ELF1,BHLHE41,ZNF442,MPHOSPH10,EREG,IRF1,FOSB,PLAGL2,NR1D1,ZNF317,ZNF10,PBX4,DHX29,MED17,SAFB2,JUND,ZCCHC9,THAP1,RRP8,NXT1,IGHMBP2,MED10,CCDC59,EIF2S1,ELP3,MBD2,BHLHE40,PRPF38A,BACH2,AKIRIN2,TBRG4,PREB,ZNF430,UTP…
GO:0044238	primary metabolic process	971	8808	0.1	5.65e-18	9606.ENSP00000009041,9606.ENSP00000013125,9606.ENSP00000035307,9606.ENSP00000053468,9606.ENSP00000075120,9606.ENSP00000157600,9606.ENSP00000157812,9606.ENSP00000158771,9606.ENSP00000161006,9606.ENSP00000166139,9606.ENSP00000170168,9606.ENSP00000171111,9606.ENSP00000185150,9606.ENSP00000196489,9606.ENSP00000198767,9606.ENSP00000199320,9606.ENSP00000200453,9606.ENSP00000209728,9606.ENSP00000210444,…	STARD3NL,MAP4K5,CHPF2,MRPS10,SLC2A3,LMCD1,PSMC4,DERL2,PRSS22,FSTL3,REXO1,KEAP1,ERLEC1,ZNF416,RRN3,DIMT1,PPP1R15A,CDC6,NANS,ZNF184,SIRT1,PDXP,XBP1,RTCB,JOSD1,PHF5A,SNAPC1,ALKBH1,NFKBIA,CSTF1,CHMP4B,PSMD10,GLA,PSMD7,GABPB1,BRF2,RIPK2,GSR,DHDH,RELB,SGTA,ERF,NAMPT,FKBP14,CYP3A5,SETX,PPIF,NFKB1,PDHX,PRDM4,CSRNP2,CYP27B1,FGFR1OP2,GCLC,BYSL,HARS2,HBEGF,KLHL18,PCGF1,ODC1,CEBPZ,DLX2,MSH6,PRDM2,TBPL1,FBXO3…
GO:0034645	cellular macromolecule biosynthetic process	461	3518	0.17	7.66e-16	9606.ENSP00000035307,9606.ENSP00000053468,9606.ENSP00000157600,9606.ENSP00000166139,9606.ENSP00000171111,9606.ENSP00000196489,9606.ENSP00000198767,9606.ENSP00000209728,9606.ENSP00000211936,9606.ENSP00000212015,9606.ENSP00000216037,9606.ENSP00000216252,9606.ENSP00000216294,9606.ENSP00000217109,9606.ENSP00000220429,9606.ENSP00000220659,9606.ENSP00000221452,9606.ENSP00000222329,9606.ENSP00000224140,…	CHPF2,MRPS10,LMCD1,FSTL3,KEAP1,ZNF416,RRN3,CDC6,ZNF184,SIRT1,XBP1,PHF5A,SNAPC1,CSTF1,GABPB1,BRF2,RELB,ERF,SETX,NFKB1,PRDM4,CSRNP2,HARS2,PCGF1,CEBPZ,DLX2,PRDM2,TBPL1,ELL2,ELF1,ALG5,BHLHE41,ZNF442,EREG,IRF1,FOSB,PLAGL2,NR1D1,SDF2,ZNF317,ZNF10,SDF2L1,PBX4,DHX29,MED17,SAFB2,JUND,GRWD1,ZCCHC9,THAP1,RRP8,IGHMBP2,MED10,CCDC59,EIF2S1,ELP3,MBD2,BHLHE40,BACH2,AKIRIN2,COG3,PREB,ZNF430,LHX5,PIK3C3,WIPI1,TRIM…
GO:0006351	transcription, DNA-templated	361	2569	0.2	1.19e-15	9606.ENSP00000157600,9606.ENSP00000166139,9606.ENSP00000171111,9606.ENSP00000196489,9606.ENSP00000198767,9606.ENSP00000211936,9606.ENSP00000212015,9606.ENSP00000216037,9606.ENSP00000216252,9606.ENSP00000216294,9606.ENSP00000217109,9606.ENSP00000220429,9606.ENSP00000220659,9606.ENSP00000221452,9606.ENSP00000222329,9606.ENSP00000224140,9606.ENSP00000226574,9606.ENSP00000228437,9606.ENSP00000228515,…	LMCD1,FSTL3,KEAP1,ZNF416,RRN3,ZNF184,SIRT1,XBP1,PHF5A,SNAPC1,CSTF1,GABPB1,BRF2,RELB,ERF,SETX,NFKB1,PRDM4,CSRNP2,PCGF1,CEBPZ,DLX2,PRDM2,TBPL1,ELL2,ELF1,BHLHE41,ZNF442,EREG,IRF1,FOSB,PLAGL2,NR1D1,ZNF317,ZNF10,PBX4,MED17,SAFB2,JUND,ZCCHC9,THAP1,RRP8,IGHMBP2,MED10,CCDC59,ELP3,MBD2,BHLHE40,BACH2,AKIRIN2,PREB,ZNF430,LHX5,TRIM37,ELL,EPC1,MED15,MED26,ARID3A,CCNT2,ARID4B,MXD1,FOSL2,GPBP1,PPARGC1A,SOX30,LE…
GO:0009059	macromolecule biosynthetic process	464	3576	0.17	2.58e-15	9606.ENSP00000035307,9606.ENSP00000053468,9606.ENSP00000157600,9606.ENSP00000166139,9606.ENSP00000171111,9606.ENSP00000196489,9606.ENSP00000198767,9606.ENSP00000209728,9606.ENSP00000211936,9606.ENSP00000212015,9606.ENSP00000216037,9606.ENSP00000216252,9606.ENSP00000216294,9606.ENSP00000217109,9606.ENSP00000220429,9606.ENSP00000220659,9606.ENSP00000221452,9606.ENSP00000222329,9606.ENSP00000224140,…	CHPF2,MRPS10,LMCD1,FSTL3,KEAP1,ZNF416,RRN3,CDC6,ZNF184,SIRT1,XBP1,PHF5A,SNAPC1,CSTF1,GABPB1,BRF2,RELB,ERF,SETX,NFKB1,PRDM4,CSRNP2,HARS2,PCGF1,CEBPZ,DLX2,PRDM2,TBPL1,ELL2,ELF1,ALG5,BHLHE41,ZNF442,EREG,IRF1,FOSB,PLAGL2,NR1D1,SDF2,ZNF317,ZNF10,SDF2L1,PBX4,DHX29,MED17,SAFB2,JUND,GRWD1,ZCCHC9,THAP1,RRP8,IGHMBP2,MED10,CCDC59,EIF2S1,ELP3,MBD2,BHLHE40,BACH2,AKIRIN2,COG3,PREB,ZNF430,LHX5,PIK3C3,WIPI1,TRIM…
GO:0006357	regulation of transcription by RNA polymerase II	365	2633	0.2	4.37e-15	9606.ENSP00000054650,9606.ENSP00000157600,9606.ENSP00000157812,9606.ENSP00000166139,9606.ENSP00000196489,9606.ENSP00000211936,9606.ENSP00000212015,9606.ENSP00000216037,9606.ENSP00000216117,9606.ENSP00000216797,9606.ENSP00000217958,9606.ENSP00000220429,9606.ENSP00000220751,9606.ENSP00000221452,9606.ENSP00000222329,9606.ENSP00000222553,9606.ENSP00000223095,9606.ENSP00000224140,9606.ENSP00000226574,…	THAP3,LMCD1,PSMC4,FSTL3,ZNF416,ZNF184,SIRT1,XBP1,HMOX1,NFKBIA,PSMD10,GABPB1,RIPK2,RELB,ERF,NAMPT,SERPINE1,SETX,NFKB1,PRDM4,CSRNP2,MDFI,CEBPZ,DLX2,PRDM2,TBPL1,ATAD2B,ELF1,BHLHE41,ZNF442,SNAI1,IRF1,INSIG2,FOSB,PLAGL2,NR1D1,ZNF317,ZNF10,LIF,DLL4,EAPP,EGLN3,PBX4,RAF1,MED17,SAFB2,GDF15,JUND,SESN2,PPIL4,THAP1,DNAJB1,KDM6B,MED10,ELP3,MBD2,BHLHE40,BACH2,AKIRIN2,RIPK1,USP2,ZNF430,LHX5,TRIM37,NLRC5,ELL,C19…
GO:0090304	nucleic acid metabolic process	499	3941	0.16	5.48e-15	9606.ENSP00000157600,9606.ENSP00000166139,9606.ENSP00000170168,9606.ENSP00000171111,9606.ENSP00000196489,9606.ENSP00000198767,9606.ENSP00000199320,9606.ENSP00000209728,9606.ENSP00000211936,9606.ENSP00000212015,9606.ENSP00000216037,9606.ENSP00000216038,9606.ENSP00000216252,9606.ENSP00000216294,9606.ENSP00000216489,9606.ENSP00000217109,9606.ENSP00000220429,9606.ENSP00000220659,9606.ENSP00000221452,…	LMCD1,FSTL3,REXO1,KEAP1,ZNF416,RRN3,DIMT1,CDC6,ZNF184,SIRT1,XBP1,RTCB,PHF5A,SNAPC1,ALKBH1,CSTF1,GABPB1,BRF2,RELB,ERF,SETX,NFKB1,PRDM4,CSRNP2,BYSL,HARS2,PCGF1,CEBPZ,DLX2,MSH6,PRDM2,TBPL1,ELL2,DDX55,ELF1,BHLHE41,ZNF442,MPHOSPH10,EREG,IRF1,FOSB,PLAGL2,NR1D1,ZNF317,ZNF10,CDADC1,PBX4,DHX29,MED17,SAFB2,JUND,SESN2,GRWD1,ZCCHC9,THAP1,RRP8,IGHMBP2,MED10,CCDC59,ELP3,MBD2,BHLHE40,PRPF38A,BACH2,AKIRIN2,TBRG4…
GO:0009893	positive regulation of metabolic process	423	3280	0.17	3.31e-13	9606.ENSP00000013125,9606.ENSP00000157812,9606.ENSP00000166139,9606.ENSP00000171111,9606.ENSP00000179259,9606.ENSP00000198767,9606.ENSP00000199320,9606.ENSP00000200453,9606.ENSP00000209728,9606.ENSP00000212015,9606.ENSP00000215631,9606.ENSP00000216037,9606.ENSP00000216117,9606.ENSP00000216252,9606.ENSP00000216797,9606.ENSP00000217958,9606.ENSP00000220325,9606.ENSP00000220429,9606.ENSP00000220751,…	MAP4K5,PSMC4,FSTL3,KEAP1,C12orf5,RRN3,DIMT1,PPP1R15A,CDC6,SIRT1,GADD45B,XBP1,HMOX1,PHF5A,NFKBIA,PSMD10,EHD4,GABPB1,RIPK2,RELB,SGTA,NAMPT,SERPINE1,SETX,NFKB1,PRDM4,CSRNP2,CYP27B1,GCLC,GUCA1B,HBEGF,CEBPZ,DLX2,MSH6,PRDM2,TBPL1,ATAD2B,ELF1,SNAI1,EREG,IRF1,INSIG2,FOSB,PLAGL2,NR1D1,TICAM1,LIF,DLL4,EAPP,EGLN3,PBX4,RAF1,MED17,GADD45G,GDF15,JUND,SESN2,KDM6B,MED10,IRAK2,ADAM19,AKIRIN2,RIPK1,SDCBP,DCUN1D5,T…
GO:0043412	macromolecule modification	414	3197	0.17	4.06e-13	9606.ENSP00000013125,9606.ENSP00000157812,9606.ENSP00000158771,9606.ENSP00000166139,9606.ENSP00000171111,9606.ENSP00000199320,9606.ENSP00000200453,9606.ENSP00000212015,9606.ENSP00000215904,9606.ENSP00000216039,9606.ENSP00000216489,9606.ENSP00000216797,9606.ENSP00000217958,9606.ENSP00000219313,9606.ENSP00000220751,9606.ENSP00000222803,9606.ENSP00000224140,9606.ENSP00000225174,9606.ENSP00000226574,…	MAP4K5,PSMC4,DERL2,FSTL3,KEAP1,DIMT1,PPP1R15A,SIRT1,PDXP,JOSD1,ALKBH1,NFKBIA,PSMD10,PSMD7,RIPK2,FKBP14,SETX,PPIF,NFKB1,PRDM4,FGFR1OP2,HBEGF,KLHL18,PCGF1,PRDM2,FBXO30,RNF103,DUSP1,ALG5,RNF11,EREG,WNK4,SDF2,FBXL12,SDF2L1,LIF,EGLN3,MKNK2,CDADC1,RAF1,PPIL4,PRKAB2,ILKAP,KDM6B,USPL1,MED10,BTG1,RNF122,EIF2S1,ELP3,MBD2,IRAK2,BACH2,COG3,TBRG4,RIPK1,USP2,DCUN1D5,THBS1,TTLL7,PSMD11,NAA25,MAPK6,PIK3C3,MMD,WI…
GO:0010604	positive regulation of macromolecule metabolic process	400	3081	0.17	1.02e-12	9606.ENSP00000013125,9606.ENSP00000157812,9606.ENSP00000166139,9606.ENSP00000171111,9606.ENSP00000179259,9606.ENSP00000198767,9606.ENSP00000199320,9606.ENSP00000200453,9606.ENSP00000209728,9606.ENSP00000212015,9606.ENSP00000215631,9606.ENSP00000216037,9606.ENSP00000216117,9606.ENSP00000216252,9606.ENSP00000216797,9606.ENSP00000217958,9606.ENSP00000220325,9606.ENSP00000220429,9606.ENSP00000220751,…	MAP4K5,PSMC4,FSTL3,KEAP1,C12orf5,RRN3,DIMT1,PPP1R15A,CDC6,SIRT1,GADD45B,XBP1,HMOX1,PHF5A,NFKBIA,PSMD10,EHD4,GABPB1,RIPK2,RELB,SGTA,NAMPT,SERPINE1,SETX,NFKB1,PRDM4,CSRNP2,GCLC,HBEGF,CEBPZ,DLX2,MSH6,PRDM2,TBPL1,ATAD2B,ELF1,SNAI1,EREG,IRF1,INSIG2,FOSB,PLAGL2,NR1D1,TICAM1,LIF,DLL4,EAPP,EGLN3,PBX4,RAF1,MED17,GADD45G,GDF15,JUND,SESN2,KDM6B,MED10,IRAK2,ADAM19,AKIRIN2,RIPK1,SDCBP,DCUN1D5,THBS1,CCND2,LHX5…
GO:0034654	nucleobase-containing compound biosynthetic process	394	3031	0.17	1.46e-12	9606.ENSP00000157600,9606.ENSP00000166139,9606.ENSP00000171111,9606.ENSP00000196489,9606.ENSP00000198767,9606.ENSP00000210444,9606.ENSP00000211936,9606.ENSP00000212015,9606.ENSP00000216037,9606.ENSP00000216252,9606.ENSP00000216294,9606.ENSP00000217109,9606.ENSP00000220429,9606.ENSP00000220659,9606.ENSP00000221452,9606.ENSP00000222329,9606.ENSP00000222553,9606.ENSP00000224140,9606.ENSP00000226574,…	LMCD1,FSTL3,KEAP1,ZNF416,RRN3,NANS,ZNF184,SIRT1,XBP1,PHF5A,SNAPC1,CSTF1,GABPB1,BRF2,RELB,ERF,NAMPT,SETX,NFKB1,PDHX,PRDM4,CSRNP2,PCGF1,CEBPZ,DLX2,PRDM2,TBPL1,ELL2,ELF1,BHLHE41,ZNF442,EREG,IRF1,FOSB,PLAGL2,NR1D1,ZNF317,ZNF10,PBX4,MED17,SAFB2,JUND,ZCCHC9,THAP1,RRP8,IGHMBP2,MED10,CCDC59,ELP3,MBD2,BHLHE40,CMPK2,BACH2,AKIRIN2,PREB,ZNF430,LHX5,TRIM37,ELL,EPC1,UFD1L,MED15,MED26,ARID3A,CCNT2,ARID4B,MXD1,F…
GO:0044267	cellular protein metabolic process	452	3603	0.16	1.46e-12	9606.ENSP00000013125,9606.ENSP00000053468,9606.ENSP00000157600,9606.ENSP00000157812,9606.ENSP00000158771,9606.ENSP00000166139,9606.ENSP00000171111,9606.ENSP00000185150,9606.ENSP00000200453,9606.ENSP00000212015,9606.ENSP00000215904,9606.ENSP00000216037,9606.ENSP00000216039,9606.ENSP00000216797,9606.ENSP00000217402,9606.ENSP00000217958,9606.ENSP00000219313,9606.ENSP00000220751,9606.ENSP00000221566,…	MAP4K5,MRPS10,LMCD1,PSMC4,DERL2,FSTL3,KEAP1,ERLEC1,PPP1R15A,SIRT1,PDXP,XBP1,JOSD1,NFKBIA,CHMP4B,PSMD10,PSMD7,RIPK2,SGTA,FKBP14,SETX,PPIF,NFKB1,PRDM4,FGFR1OP2,HARS2,HBEGF,KLHL18,PCGF1,PRDM2,FBXO30,RNF103,DUSP1,ALG5,RNF11,EREG,NR1D1,WNK4,SDF2,FBXL12,SDF2L1,LIF,DNAJB9,EGLN3,MKNK2,DHX29,RAF1,PPIL4,PRKAB2,ILKAP,H3F3B,KDM6B,IGHMBP2,USPL1,MED10,BTG1,CCDC59,RNF122,EIF2S1,ELP3,IRAK2,BACH2,COG3,TBRG4,RIPK1…
GO:0006464	cellular protein modification process	389	2999	0.17	2.96e-12	9606.ENSP00000013125,9606.ENSP00000157812,9606.ENSP00000158771,9606.ENSP00000166139,9606.ENSP00000171111,9606.ENSP00000200453,9606.ENSP00000212015,9606.ENSP00000215904,9606.ENSP00000216039,9606.ENSP00000216797,9606.ENSP00000217958,9606.ENSP00000219313,9606.ENSP00000220751,9606.ENSP00000222803,9606.ENSP00000224140,9606.ENSP00000225174,9606.ENSP00000226574,9606.ENSP00000228437,9606.ENSP00000229395,…	MAP4K5,PSMC4,DERL2,FSTL3,KEAP1,PPP1R15A,SIRT1,PDXP,JOSD1,NFKBIA,PSMD10,PSMD7,RIPK2,FKBP14,SETX,PPIF,NFKB1,PRDM4,FGFR1OP2,HBEGF,KLHL18,PCGF1,PRDM2,FBXO30,RNF103,DUSP1,ALG5,RNF11,EREG,WNK4,SDF2,FBXL12,SDF2L1,LIF,EGLN3,MKNK2,RAF1,PPIL4,PRKAB2,ILKAP,KDM6B,USPL1,MED10,BTG1,RNF122,EIF2S1,ELP3,IRAK2,BACH2,COG3,TBRG4,RIPK1,USP2,DCUN1D5,THBS1,TTLL7,PSMD11,NAA25,MAPK6,PIK3C3,MMD,WIPI1,TRIM37,WSB1,CFAP20,MA…
GO:0051173	positive regulation of nitrogen compound metabolic process	383	2946	0.17	3.59e-12	9606.ENSP00000013125,9606.ENSP00000157812,9606.ENSP00000166139,9606.ENSP00000171111,9606.ENSP00000179259,9606.ENSP00000198767,9606.ENSP00000199320,9606.ENSP00000200453,9606.ENSP00000209728,9606.ENSP00000212015,9606.ENSP00000215631,9606.ENSP00000216037,9606.ENSP00000216117,9606.ENSP00000216252,9606.ENSP00000216797,9606.ENSP00000217958,9606.ENSP00000220325,9606.ENSP00000220429,9606.ENSP00000220751,…	MAP4K5,PSMC4,FSTL3,KEAP1,C12orf5,RRN3,DIMT1,PPP1R15A,CDC6,SIRT1,GADD45B,XBP1,HMOX1,PHF5A,NFKBIA,PSMD10,EHD4,GABPB1,RIPK2,RELB,SGTA,NAMPT,SERPINE1,SETX,NFKB1,PRDM4,CSRNP2,GCLC,GUCA1B,HBEGF,CEBPZ,DLX2,MSH6,PRDM2,TBPL1,ATAD2B,ELF1,SNAI1,EREG,IRF1,INSIG2,FOSB,PLAGL2,NR1D1,TICAM1,LIF,EAPP,EGLN3,PBX4,RAF1,MED17,GADD45G,GDF15,JUND,SESN2,KDM6B,MED10,IRAK2,AKIRIN2,RIPK1,SDCBP,DCUN1D5,THBS1,CCND2,LHX5,SEMA…
GO:0044271	cellular nitrogen compound biosynthetic process	442	3528	0.16	3.7e-12	9606.ENSP00000053468,9606.ENSP00000157600,9606.ENSP00000166139,9606.ENSP00000171111,9606.ENSP00000196489,9606.ENSP00000198767,9606.ENSP00000210444,9606.ENSP00000211936,9606.ENSP00000212015,9606.ENSP00000216037,9606.ENSP00000216252,9606.ENSP00000216294,9606.ENSP00000217109,9606.ENSP00000220429,9606.ENSP00000220659,9606.ENSP00000221452,9606.ENSP00000222329,9606.ENSP00000222553,9606.ENSP00000224140,…	MRPS10,LMCD1,FSTL3,KEAP1,ZNF416,RRN3,NANS,ZNF184,SIRT1,XBP1,PHF5A,SNAPC1,CSTF1,GABPB1,BRF2,RELB,ERF,NAMPT,SETX,NFKB1,PDHX,PRDM4,CSRNP2,GCLC,HARS2,PCGF1,ODC1,CEBPZ,DLX2,PRDM2,TBPL1,ELL2,ELF1,BHLHE41,ZNF442,EREG,IRF1,FOSB,PLAGL2,NR1D1,ZNF317,ZNF10,PBX4,DHX29,MED17,SAFB2,JUND,ZCCHC9,THAP1,RRP8,IGHMBP2,MED10,CCDC59,EIF2S1,ELP3,MBD2,BHLHE40,CMPK2,BACH2,AKIRIN2,PREB,ZNF430,COX10,LHX5,TRIM37,ELL,EPC1,UF…
GO:0018130	heterocycle biosynthetic process	398	3095	0.17	3.85e-12	9606.ENSP00000157600,9606.ENSP00000166139,9606.ENSP00000171111,9606.ENSP00000196489,9606.ENSP00000198767,9606.ENSP00000210444,9606.ENSP00000211936,9606.ENSP00000212015,9606.ENSP00000216037,9606.ENSP00000216252,9606.ENSP00000216294,9606.ENSP00000217109,9606.ENSP00000220429,9606.ENSP00000220659,9606.ENSP00000221452,9606.ENSP00000222329,9606.ENSP00000222553,9606.ENSP00000224140,9606.ENSP00000226574,…	LMCD1,FSTL3,KEAP1,ZNF416,RRN3,NANS,ZNF184,SIRT1,XBP1,PHF5A,SNAPC1,CSTF1,GABPB1,BRF2,RELB,ERF,NAMPT,SETX,NFKB1,PDHX,PRDM4,CSRNP2,PCGF1,CEBPZ,DLX2,PRDM2,TBPL1,ELL2,ELF1,BHLHE41,ZNF442,EREG,IRF1,FOSB,PLAGL2,NR1D1,ZNF317,ZNF10,PBX4,MED17,SAFB2,JUND,ZCCHC9,THAP1,RRP8,IGHMBP2,MED10,CCDC59,ELP3,MBD2,BHLHE40,CMPK2,BACH2,AKIRIN2,PREB,ZNF430,COX10,LHX5,TRIM37,ELL,EPC1,UFD1L,MED15,MED26,ARID3A,CCNT2,ARID4B,…
GO:0019438	aromatic compound biosynthetic process	398	3100	0.17	4.7e-12	9606.ENSP00000157600,9606.ENSP00000166139,9606.ENSP00000171111,9606.ENSP00000196489,9606.ENSP00000198767,9606.ENSP00000210444,9606.ENSP00000211936,9606.ENSP00000212015,9606.ENSP00000216037,9606.ENSP00000216252,9606.ENSP00000216294,9606.ENSP00000217109,9606.ENSP00000220429,9606.ENSP00000220659,9606.ENSP00000221452,9606.ENSP00000222329,9606.ENSP00000222553,9606.ENSP00000224140,9606.ENSP00000226574,…	LMCD1,FSTL3,KEAP1,ZNF416,RRN3,NANS,ZNF184,SIRT1,XBP1,PHF5A,SNAPC1,CSTF1,GABPB1,BRF2,RELB,ERF,NAMPT,SETX,NFKB1,PDHX,PRDM4,CSRNP2,PCGF1,CEBPZ,DLX2,PRDM2,TBPL1,ELL2,ELF1,BHLHE41,ZNF442,EREG,IRF1,FOSB,PLAGL2,NR1D1,ZNF317,ZNF10,PBX4,MED17,SAFB2,JUND,ZCCHC9,THAP1,RRP8,IGHMBP2,MED10,CCDC59,ELP3,MBD2,BHLHE40,CMPK2,BACH2,AKIRIN2,PREB,ZNF430,COX10,LHX5,TRIM37,ELL,EPC1,UFD1L,MED15,MED26,ARID3A,CCNT2,ARID4B,…
GO:0031325	positive regulation of cellular metabolic process	393	3060	0.17	6.84e-12	9606.ENSP00000013125,9606.ENSP00000157812,9606.ENSP00000166139,9606.ENSP00000171111,9606.ENSP00000179259,9606.ENSP00000198767,9606.ENSP00000199320,9606.ENSP00000200453,9606.ENSP00000209728,9606.ENSP00000212015,9606.ENSP00000215631,9606.ENSP00000216037,9606.ENSP00000216117,9606.ENSP00000216252,9606.ENSP00000216797,9606.ENSP00000217958,9606.ENSP00000220325,9606.ENSP00000220429,9606.ENSP00000220751,…	MAP4K5,PSMC4,FSTL3,KEAP1,C12orf5,RRN3,DIMT1,PPP1R15A,CDC6,SIRT1,GADD45B,XBP1,HMOX1,PHF5A,NFKBIA,PSMD10,EHD4,GABPB1,RIPK2,RELB,SGTA,NAMPT,SERPINE1,SETX,NFKB1,PRDM4,CSRNP2,GCLC,GUCA1B,HBEGF,CEBPZ,DLX2,MSH6,PRDM2,TBPL1,ATAD2B,ELF1,SNAI1,EREG,IRF1,INSIG2,FOSB,PLAGL2,NR1D1,TICAM1,LIF,EAPP,EGLN3,PBX4,RAF1,MED17,GADD45G,GDF15,JUND,SESN2,KDM6B,MED10,IRAK2,AKIRIN2,RIPK1,SDCBP,DCUN1D5,THBS1,CCND2,LHX5,SEMA…
GO:1901362	organic cyclic compound biosynthetic process	410	3230	0.16	7.61e-12	9606.ENSP00000009041,9606.ENSP00000157600,9606.ENSP00000166139,9606.ENSP00000171111,9606.ENSP00000196489,9606.ENSP00000198767,9606.ENSP00000210444,9606.ENSP00000211936,9606.ENSP00000212015,9606.ENSP00000216037,9606.ENSP00000216252,9606.ENSP00000216294,9606.ENSP00000217109,9606.ENSP00000220429,9606.ENSP00000220659,9606.ENSP00000221452,9606.ENSP00000222329,9606.ENSP00000222553,9606.ENSP00000224140,…	STARD3NL,LMCD1,FSTL3,KEAP1,ZNF416,RRN3,NANS,ZNF184,SIRT1,XBP1,PHF5A,SNAPC1,CSTF1,GABPB1,BRF2,RELB,ERF,NAMPT,SETX,NFKB1,PDHX,PRDM4,CSRNP2,CYP27B1,PCGF1,CEBPZ,DLX2,PRDM2,TBPL1,ELL2,ELF1,BHLHE41,ZNF442,EREG,IRF1,INSIG2,FOSB,PLAGL2,NR1D1,ZNF317,ZNF10,PBX4,MED17,SAFB2,JUND,ZCCHC9,THAP1,HSD17B7,RRP8,IGHMBP2,MED10,CCDC59,ELP3,MBD2,BHLHE40,CMPK2,BACH2,AKIRIN2,PREB,MSMO1,ZNF430,COX10,LHX5,TRIM37,ELL,EPC1,…
GO:0006139	nucleobase-containing compound metabolic process	536	4551	0.13	4.71e-11	9606.ENSP00000157600,9606.ENSP00000166139,9606.ENSP00000170168,9606.ENSP00000171111,9606.ENSP00000196489,9606.ENSP00000198767,9606.ENSP00000199320,9606.ENSP00000209728,9606.ENSP00000210444,9606.ENSP00000211936,9606.ENSP00000212015,9606.ENSP00000216037,9606.ENSP00000216038,9606.ENSP00000216252,9606.ENSP00000216294,9606.ENSP00000216489,9606.ENSP00000217109,9606.ENSP00000220429,9606.ENSP00000220659,…	LMCD1,FSTL3,REXO1,KEAP1,ZNF416,RRN3,DIMT1,CDC6,NANS,ZNF184,SIRT1,XBP1,RTCB,PHF5A,SNAPC1,ALKBH1,CSTF1,GABPB1,BRF2,GSR,RELB,ERF,NAMPT,SETX,NFKB1,PDHX,PRDM4,CSRNP2,BYSL,HARS2,PCGF1,CEBPZ,DLX2,MSH6,PRDM2,TBPL1,ELL2,DDX55,ELF1,BHLHE41,ZNF442,MPHOSPH10,EREG,IRF1,FOSB,PLAGL2,NR1D1,ZNF317,ZNF10,CDADC1,PBX4,DHX29,MED17,SAFB2,JUND,SESN2,GRWD1,ZCCHC9,THAP1,RRP8,IGHMBP2,MED10,CCDC59,ELP3,MBD2,BHLHE40,CMPK2,P…
GO:0034976	response to endoplasmic reticulum stress	65	240	0.49	4.8e-11	9606.ENSP00000157812,9606.ENSP00000158771,9606.ENSP00000185150,9606.ENSP00000200453,9606.ENSP00000216037,9606.ENSP00000221566,9606.ENSP00000222803,9606.ENSP00000237455,9606.ENSP00000247020,9606.ENSP00000248958,9606.ENSP00000249356,9606.ENSP00000253063,9606.ENSP00000256383,9606.ENSP00000260356,9606.ENSP00000260643,9606.ENSP00000261942,9606.ENSP00000262139,9606.ENSP00000262947,9606.ENSP00000263202,…	PSMC4,DERL2,ERLEC1,PPP1R15A,XBP1,SGTA,FKBP14,RNF103,SDF2,SDF2L1,DNAJB9,SESN2,EIF2S1,THBS1,PREB,FAF2,WIPI1,C19orf10,UFD1L,GET4,TNFRSF10B,NRBF2,TXNDC11,PDIA4,HSP90B1,RNF139,CEBPB,CXCL8,EIF2AK3,TBL2,ARFGAP1,CALR,PDIA5,HSPA5,YOD1,P4HB,SRPR,NPLOC4,DNAJB2,CREB3,ATF3,VCP,PPP1R15B,JUN,PTPN1,BAK1,TSPYL2,ZBTB17,SYVN1,SEC31A,NFE2L2,HM13,VIMP,KDELR3,CHAC1,HERPUD1,NCK1,SRPRB,SELK,ATP2A2,FICD,DDIT3,UBE2J1,DNAJ…
GO:0044249	cellular biosynthetic process	537	4567	0.13	5.53e-11	9606.ENSP00000009041,9606.ENSP00000035307,9606.ENSP00000053468,9606.ENSP00000157600,9606.ENSP00000166139,9606.ENSP00000171111,9606.ENSP00000196489,9606.ENSP00000198767,9606.ENSP00000209728,9606.ENSP00000210444,9606.ENSP00000211936,9606.ENSP00000212015,9606.ENSP00000216037,9606.ENSP00000216252,9606.ENSP00000216294,9606.ENSP00000217109,9606.ENSP00000220429,9606.ENSP00000220659,9606.ENSP00000221452,…	STARD3NL,CHPF2,MRPS10,LMCD1,FSTL3,KEAP1,ZNF416,RRN3,CDC6,NANS,ZNF184,SIRT1,XBP1,PHF5A,SNAPC1,CSTF1,GABPB1,BRF2,RELB,ERF,NAMPT,SETX,NFKB1,PDHX,PRDM4,CSRNP2,CYP27B1,GCLC,HARS2,PCGF1,ODC1,CEBPZ,DLX2,PRDM2,TBPL1,ELL2,ELF1,ALG5,BHLHE41,ZNF442,EREG,IRF1,FOSB,PLAGL2,NR1D1,SDF2,ZNF317,ZNF10,SDF2L1,PBX4,DHX29,MED17,SAFB2,JUND,GRWD1,ZCCHC9,PRKAB2,THAP1,HSD17B7,RRP8,IGHMBP2,MED10,CCDC59,EIF2S1,ELP3,MBD2,BHL…
GO:0046483	heterocycle metabolic process	551	4716	0.12	6.2e-11	9606.ENSP00000157600,9606.ENSP00000166139,9606.ENSP00000170168,9606.ENSP00000171111,9606.ENSP00000196489,9606.ENSP00000198767,9606.ENSP00000199320,9606.ENSP00000209728,9606.ENSP00000210444,9606.ENSP00000211936,9606.ENSP00000212015,9606.ENSP00000215904,9606.ENSP00000216037,9606.ENSP00000216038,9606.ENSP00000216117,9606.ENSP00000216252,9606.ENSP00000216294,9606.ENSP00000216489,9606.ENSP00000217109,…	LMCD1,FSTL3,REXO1,KEAP1,ZNF416,RRN3,DIMT1,CDC6,NANS,ZNF184,SIRT1,PDXP,XBP1,RTCB,HMOX1,PHF5A,SNAPC1,ALKBH1,CSTF1,GABPB1,BRF2,GSR,RELB,ERF,NAMPT,SETX,NFKB1,PDHX,PRDM4,CSRNP2,BYSL,HARS2,PCGF1,CEBPZ,DLX2,MSH6,PRDM2,SLC19A2,TBPL1,ABCG2,ELL2,DDX55,ELF1,BHLHE41,ZNF442,MPHOSPH10,EREG,IRF1,FOSB,PLAGL2,NR1D1,ZNF317,ZNF10,CDADC1,PBX4,DHX29,MED17,SAFB2,JUND,SESN2,GRWD1,ZCCHC9,THAP1,RRP8,IGHMBP2,MED10,CCDC59,…
GO:0034641	cellular nitrogen compound metabolic process	589	5126	0.12	9.49e-11	9606.ENSP00000053468,9606.ENSP00000157600,9606.ENSP00000166139,9606.ENSP00000170168,9606.ENSP00000171111,9606.ENSP00000196489,9606.ENSP00000198767,9606.ENSP00000199320,9606.ENSP00000209728,9606.ENSP00000210444,9606.ENSP00000211936,9606.ENSP00000212015,9606.ENSP00000215904,9606.ENSP00000216037,9606.ENSP00000216038,9606.ENSP00000216117,9606.ENSP00000216252,9606.ENSP00000216294,9606.ENSP00000216489,…	MRPS10,LMCD1,FSTL3,REXO1,KEAP1,ZNF416,RRN3,DIMT1,CDC6,NANS,ZNF184,SIRT1,PDXP,XBP1,RTCB,HMOX1,PHF5A,SNAPC1,ALKBH1,CSTF1,GLA,GABPB1,BRF2,GSR,RELB,ERF,NAMPT,CYP3A5,SETX,NFKB1,PDHX,PRDM4,CSRNP2,GCLC,BYSL,HARS2,PCGF1,ODC1,CEBPZ,DLX2,MSH6,PRDM2,SLC19A2,TBPL1,ABCG2,ELL2,DDX55,ELF1,BHLHE41,ZNF442,ORMDL2,MPHOSPH10,EREG,IRF1,FOSB,PLAGL2,NR1D1,ZNF317,ZNF10,CDADC1,PBX4,DHX29,MED17,SAFB2,JUND,SESN2,GRWD1,ZCCH…
GO:1901576	organic substance biosynthetic process	544	4656	0.12	9.49e-11	9606.ENSP00000009041,9606.ENSP00000035307,9606.ENSP00000053468,9606.ENSP00000157600,9606.ENSP00000166139,9606.ENSP00000171111,9606.ENSP00000196489,9606.ENSP00000198767,9606.ENSP00000209728,9606.ENSP00000210444,9606.ENSP00000211936,9606.ENSP00000212015,9606.ENSP00000216037,9606.ENSP00000216252,9606.ENSP00000216294,9606.ENSP00000217109,9606.ENSP00000220429,9606.ENSP00000220659,9606.ENSP00000221452,…	STARD3NL,CHPF2,MRPS10,LMCD1,FSTL3,KEAP1,ZNF416,RRN3,CDC6,NANS,ZNF184,SIRT1,XBP1,PHF5A,SNAPC1,CSTF1,GABPB1,BRF2,RELB,ERF,NAMPT,SETX,NFKB1,PDHX,PRDM4,CSRNP2,CYP27B1,GCLC,HARS2,PCGF1,ODC1,CEBPZ,DLX2,PRDM2,TBPL1,ELL2,ELF1,ALG5,BHLHE41,ZNF442,EREG,IRF1,INSIG2,FOSB,PLAGL2,NR1D1,SDF2,ZNF317,ZNF10,SDF2L1,PBX4,DHX29,MED17,SAFB2,JUND,GRWD1,ZCCHC9,PRKAB2,THAP1,HSD17B7,RRP8,IGHMBP2,MED10,CCDC59,EIF2S1,ELP3,M…
GO:0009058	biosynthetic process	549	4714	0.12	1.13e-10	9606.ENSP00000009041,9606.ENSP00000035307,9606.ENSP00000053468,9606.ENSP00000157600,9606.ENSP00000166139,9606.ENSP00000171111,9606.ENSP00000196489,9606.ENSP00000198767,9606.ENSP00000209728,9606.ENSP00000210444,9606.ENSP00000211936,9606.ENSP00000212015,9606.ENSP00000216037,9606.ENSP00000216252,9606.ENSP00000216294,9606.ENSP00000217109,9606.ENSP00000220429,9606.ENSP00000220659,9606.ENSP00000221452,…	STARD3NL,CHPF2,MRPS10,LMCD1,FSTL3,KEAP1,ZNF416,RRN3,CDC6,NANS,ZNF184,SIRT1,XBP1,PHF5A,SNAPC1,CSTF1,GABPB1,BRF2,RELB,ERF,NAMPT,SETX,NFKB1,PDHX,PRDM4,CSRNP2,CYP27B1,GCLC,HARS2,PCGF1,ODC1,CEBPZ,DLX2,PRDM2,TBPL1,ELL2,ELF1,ALG5,BHLHE41,ZNF442,EREG,IRF1,INSIG2,FOSB,PLAGL2,NR1D1,SDF2,ZNF317,ZNF10,SDF2L1,PBX4,DHX29,MED17,SAFB2,JUND,GRWD1,ZCCHC9,PRKAB2,THAP1,HSD17B7,RRP8,IGHMBP2,MED10,CCDC59,EIF2S1,ELP3,M…
GO:0006725	cellular aromatic compound metabolic process	551	4754	0.12	2.17e-10	9606.ENSP00000157600,9606.ENSP00000166139,9606.ENSP00000170168,9606.ENSP00000171111,9606.ENSP00000196489,9606.ENSP00000198767,9606.ENSP00000199320,9606.ENSP00000209728,9606.ENSP00000210444,9606.ENSP00000211936,9606.ENSP00000212015,9606.ENSP00000215904,9606.ENSP00000216037,9606.ENSP00000216038,9606.ENSP00000216117,9606.ENSP00000216252,9606.ENSP00000216294,9606.ENSP00000216489,9606.ENSP00000217109,…	LMCD1,FSTL3,REXO1,KEAP1,ZNF416,RRN3,DIMT1,CDC6,NANS,ZNF184,SIRT1,PDXP,XBP1,RTCB,HMOX1,PHF5A,SNAPC1,ALKBH1,CSTF1,GABPB1,BRF2,GSR,RELB,ERF,NAMPT,SETX,NFKB1,PDHX,PRDM4,CSRNP2,BYSL,HARS2,PCGF1,CEBPZ,DLX2,MSH6,PRDM2,SLC19A2,TBPL1,ABCG2,ELL2,DDX55,ELF1,BHLHE41,ZNF442,MPHOSPH10,EREG,IRF1,FOSB,PLAGL2,NR1D1,ZNF317,ZNF10,CDADC1,PBX4,DHX29,MED17,SAFB2,JUND,SESN2,GRWD1,AOC2,ZCCHC9,THAP1,RRP8,IGHMBP2,MED10,CC…
GO:0033554	cellular response to stress	225	1553	0.22	3.02e-10	9606.ENSP00000013125,9606.ENSP00000157812,9606.ENSP00000158771,9606.ENSP00000179259,9606.ENSP00000185150,9606.ENSP00000200453,9606.ENSP00000212015,9606.ENSP00000216037,9606.ENSP00000216117,9606.ENSP00000216489,9606.ENSP00000216797,9606.ENSP00000220659,9606.ENSP00000220751,9606.ENSP00000221130,9606.ENSP00000221452,9606.ENSP00000221566,9606.ENSP00000222803,9606.ENSP00000224140,9606.ENSP00000225174,…	MAP4K5,PSMC4,DERL2,C12orf5,ERLEC1,PPP1R15A,SIRT1,XBP1,HMOX1,ALKBH1,NFKBIA,BRF2,RIPK2,GSR,RELB,SGTA,FKBP14,SETX,PPIF,NFKB1,MSH6,RNF103,INSIG2,PITHD1,SDF2,SDF2L1,DNAJB9,EGLN3,SESN2,DNAJB1,RRP8,KDM6B,IGHMBP2,EIF2S1,IRAK2,RIPK1,THBS1,PREB,FAF2,PIK3C3,WIPI1,PRDX1,C19orf10,MAP3K8,UFD1L,IL1A,ARID3A,MAP4K3,MUL1,ICAM1,PPARGC1A,MAP3K13,UBE2B,GET4,MAPKAP1,GTF2H1,GABARAPL1,COPS3,RHOB,ISY1,PLK2,TNFRSF10B,NRBF…
GO:1901360	organic cyclic compound metabolic process	570	4963	0.12	3.02e-10	9606.ENSP00000009041,9606.ENSP00000157600,9606.ENSP00000166139,9606.ENSP00000170168,9606.ENSP00000171111,9606.ENSP00000196489,9606.ENSP00000198767,9606.ENSP00000199320,9606.ENSP00000209728,9606.ENSP00000210444,9606.ENSP00000211936,9606.ENSP00000212015,9606.ENSP00000215904,9606.ENSP00000216037,9606.ENSP00000216038,9606.ENSP00000216117,9606.ENSP00000216252,9606.ENSP00000216294,9606.ENSP00000216489,…	STARD3NL,LMCD1,FSTL3,REXO1,KEAP1,ZNF416,RRN3,DIMT1,CDC6,NANS,ZNF184,SIRT1,PDXP,XBP1,RTCB,HMOX1,PHF5A,SNAPC1,ALKBH1,CSTF1,GABPB1,BRF2,GSR,RELB,ERF,NAMPT,CYP3A5,SETX,NFKB1,PDHX,PRDM4,CSRNP2,CYP27B1,BYSL,HARS2,PCGF1,CEBPZ,DLX2,MSH6,PRDM2,SLC19A2,TBPL1,ABCG2,ELL2,DDX55,ELF1,BHLHE41,ZNF442,MPHOSPH10,EREG,IRF1,INSIG2,FOSB,PLAGL2,NR1D1,ZNF317,ZNF10,CDADC1,PBX4,DHX29,MED17,SAFB2,JUND,SESN2,GRWD1,AOC2,ZCC…
GO:0035966	response to topologically incorrect protein	52	172	0.54	3.13e-10	9606.ENSP00000158771,9606.ENSP00000216037,9606.ENSP00000222803,9606.ENSP00000247020,9606.ENSP00000248958,9606.ENSP00000249356,9606.ENSP00000254322,9606.ENSP00000256383,9606.ENSP00000259339,9606.ENSP00000260356,9606.ENSP00000260643,9606.ENSP00000261942,9606.ENSP00000262139,9606.ENSP00000262947,9606.ENSP00000263202,9606.ENSP00000299767,9606.ENSP00000306512,9606.ENSP00000307235,9606.ENSP00000307260,…	DERL2,XBP1,FKBP14,SDF2,SDF2L1,DNAJB9,DNAJB1,EIF2S1,TOR1B,THBS1,PREB,FAF2,WIPI1,C19orf10,UFD1L,HSP90B1,CXCL8,EIF2AK3,TBL2,ARFGAP1,CLU,HSPH1,CALR,PDIA5,HSPA5,YOD1,SRPR,HSP90AA1,DNAJB2,CREB3,ATF3,VCP,DNAJB4,PTPN1,BAK1,TSPYL2,ZBTB17,SYVN1,OPTN,SEC31A,NFE2L2,VIMP,KDELR3,CHAC1,DNAJB5,HERPUD1,SRPRB,MANF,FICD,DDIT3,DNAJC3,BHLHA15
GO:0006986	response to unfolded protein	48	153	0.55	7.27e-10	9606.ENSP00000158771,9606.ENSP00000216037,9606.ENSP00000222803,9606.ENSP00000249356,9606.ENSP00000254322,9606.ENSP00000256383,9606.ENSP00000259339,9606.ENSP00000260356,9606.ENSP00000260643,9606.ENSP00000261942,9606.ENSP00000262139,9606.ENSP00000262947,9606.ENSP00000299767,9606.ENSP00000306512,9606.ENSP00000307235,9606.ENSP00000307260,9606.ENSP00000314615,9606.ENSP00000318687,9606.ENSP00000320866,…	DERL2,XBP1,FKBP14,DNAJB9,DNAJB1,EIF2S1,TOR1B,THBS1,PREB,FAF2,WIPI1,C19orf10,HSP90B1,CXCL8,EIF2AK3,TBL2,ARFGAP1,HSPH1,CALR,PDIA5,HSPA5,YOD1,SRPR,HSP90AA1,DNAJB2,CREB3,ATF3,VCP,DNAJB4,PTPN1,BAK1,TSPYL2,ZBTB17,SYVN1,OPTN,SEC31A,NFE2L2,VIMP,KDELR3,CHAC1,DNAJB5,HERPUD1,SRPRB,MANF,FICD,DDIT3,DNAJC3,BHLHA15
GO:0048518	positive regulation of biological process	612	5459	0.11	1.56e-09	9606.ENSP00000013125,9606.ENSP00000157600,9606.ENSP00000157812,9606.ENSP00000158771,9606.ENSP00000166139,9606.ENSP00000171111,9606.ENSP00000179259,9606.ENSP00000198767,9606.ENSP00000199320,9606.ENSP00000200453,9606.ENSP00000202556,9606.ENSP00000209728,9606.ENSP00000212015,9606.ENSP00000215631,9606.ENSP00000215904,9606.ENSP00000216037,9606.ENSP00000216117,9606.ENSP00000216252,9606.ENSP00000216373,…	MAP4K5,LMCD1,PSMC4,DERL2,FSTL3,KEAP1,C12orf5,RRN3,DIMT1,PPP1R15A,PPP1R13B,CDC6,SIRT1,GADD45B,PDXP,XBP1,HMOX1,PHF5A,SOS2,NFKBIA,CHMP4B,PSMD10,EHD4,GABPB1,BLOC1S6,RIPK2,RELB,SGTA,NAMPT,SERPINE1,SETX,PPIF,NFKB1,PRDM4,CSRNP2,CYP27B1,CLEC4A,GCLC,GUCA1B,HBEGF,TUSC2,ODC1,CEBPZ,DLX2,MSH6,PRDM2,RGS2,TBPL1,ATAD2B,DUSP1,ELF1,SNAI1,EREG,IRF1,INSIG2,TNFSF9,FOSB,PLAGL2,NR1D1,TICAM1,LIF,DLL4,EAPP,EGLN3,PBX4,RAF…
GO:0019538	protein metabolic process	491	4194	0.13	1.66e-09	9606.ENSP00000013125,9606.ENSP00000035307,9606.ENSP00000053468,9606.ENSP00000157600,9606.ENSP00000157812,9606.ENSP00000158771,9606.ENSP00000161006,9606.ENSP00000166139,9606.ENSP00000171111,9606.ENSP00000185150,9606.ENSP00000200453,9606.ENSP00000212015,9606.ENSP00000215904,9606.ENSP00000216037,9606.ENSP00000216039,9606.ENSP00000216797,9606.ENSP00000217402,9606.ENSP00000217958,9606.ENSP00000219313,…	MAP4K5,CHPF2,MRPS10,LMCD1,PSMC4,DERL2,PRSS22,FSTL3,KEAP1,ERLEC1,PPP1R15A,SIRT1,PDXP,XBP1,JOSD1,NFKBIA,CHMP4B,PSMD10,PSMD7,RIPK2,SGTA,FKBP14,SETX,PPIF,NFKB1,PRDM4,FGFR1OP2,HARS2,HBEGF,KLHL18,PCGF1,PRDM2,FBXO30,RNF103,DUSP1,ALG5,RNF11,EREG,NR1D1,WNK4,SDF2,FBXL12,SDF2L1,LIF,DNAJB9,EGLN3,MKNK2,DHX29,RAF1,NUMBL,PPIL4,PRKAB2,ILKAP,H3F3B,KDM6B,IGHMBP2,USPL1,MED10,BTG1,CCDC59,RNF122,EIF2S1,ELP3,IRAK2,ADA…
GO:0009987	cellular process	1405	14652	0.04	1.76e-09	9606.ENSP00000009041,9606.ENSP00000013125,9606.ENSP00000014914,9606.ENSP00000033079,9606.ENSP00000035307,9606.ENSP00000053468,9606.ENSP00000064780,9606.ENSP00000075120,9606.ENSP00000157600,9606.ENSP00000157812,9606.ENSP00000158771,9606.ENSP00000163416,9606.ENSP00000166139,9606.ENSP00000170168,9606.ENSP00000171111,9606.ENSP00000179259,9606.ENSP00000185150,9606.ENSP00000193322,9606.ENSP00000196489,…	STARD3NL,MAP4K5,GPRC5A,FAM13B,CHPF2,MRPS10,RELT,SLC2A3,LMCD1,PSMC4,DERL2,GOLGA5,FSTL3,REXO1,KEAP1,C12orf5,ERLEC1,OSTM1,ZNF416,RRN3,DIMT1,PPP1R15A,PDRG1,PPP1R13B,CDC6,NANS,ZNF184,SIRT1,GADD45B,PDXP,XBP1,RTCB,JOSD1,HMOX1,PHF5A,SNAPC1,SOS2,CGRRF1,ALKBH1,NFKBIA,CSTF1,CHMP4B,PSMD10,KCND1,GLA,PSMD7,EHD4,GABPB1,RHOV,VPS18,BLOC1S6,BRF2,RIPK2,GSR,DHDH,RELB,SGTA,ERF,BET1,NAMPT,FKBP14,CYP3A5,SERPINE1,YKT6,C…
GO:0050794	regulation of cellular process	1061	10484	0.06	2.41e-09	9606.ENSP00000013125,9606.ENSP00000014914,9606.ENSP00000033079,9606.ENSP00000054650,9606.ENSP00000064780,9606.ENSP00000157600,9606.ENSP00000157812,9606.ENSP00000158771,9606.ENSP00000166139,9606.ENSP00000171111,9606.ENSP00000179259,9606.ENSP00000185150,9606.ENSP00000196489,9606.ENSP00000198767,9606.ENSP00000199320,9606.ENSP00000200453,9606.ENSP00000202556,9606.ENSP00000209728,9606.ENSP00000211936,…	MAP4K5,GPRC5A,FAM13B,THAP3,RELT,LMCD1,PSMC4,DERL2,FSTL3,KEAP1,C12orf5,ERLEC1,ZNF416,RRN3,DIMT1,PPP1R15A,PPP1R13B,CDC6,ZNF184,SIRT1,GADD45B,PDXP,XBP1,HMOX1,PHF5A,SNAPC1,SOS2,CGRRF1,ALKBH1,NFKBIA,TPD52L2,CHMP4B,PSMD10,GLA,EHD4,GABPB1,RHOV,VPS18,BLOC1S6,BRF2,RIPK2,GSR,RELB,SGTA,ERF,NAMPT,FKBP14,SERPINE1,CHMP5,SETX,PPIF,RASD1,AKAP10,NFKB1,IL10RA,PRDM4,CSRNP2,CYP27B1,CLEC4A,GCLC,MDFI,GUCA1B,HBEGF,BNIP…
GO:0051254	positive regulation of RNA metabolic process	224	1596	0.2	4.51e-09	9606.ENSP00000157812,9606.ENSP00000166139,9606.ENSP00000198767,9606.ENSP00000199320,9606.ENSP00000212015,9606.ENSP00000216037,9606.ENSP00000216252,9606.ENSP00000216797,9606.ENSP00000220429,9606.ENSP00000220751,9606.ENSP00000221452,9606.ENSP00000222553,9606.ENSP00000223095,9606.ENSP00000224140,9606.ENSP00000226574,9606.ENSP00000228437,9606.ENSP00000228515,9606.ENSP00000234170,9606.ENSP00000234198,…	PSMC4,FSTL3,RRN3,DIMT1,SIRT1,XBP1,PHF5A,NFKBIA,GABPB1,RIPK2,RELB,NAMPT,SERPINE1,SETX,NFKB1,PRDM4,CSRNP2,CEBPZ,DLX2,PRDM2,TBPL1,ATAD2B,ELF1,SNAI1,IRF1,INSIG2,FOSB,PLAGL2,NR1D1,LIF,EAPP,PBX4,RAF1,MED17,JUND,SESN2,KDM6B,MED10,AKIRIN2,RIPK1,LHX5,NLRC5,ELL,C19orf10,EPC1,IL1A,MED26,ARID3A,ACVR1,CCNT2,ARID4B,FOSL2,GPBP1,PPARGC1A,LEF1,CREM,GTF2H1,GMEB2,TEF,TRIP11,WDR61,TAF4B,MEF2D,CSRNP1,EAF2,CDKN2B,PPRC…
GO:0010628	positive regulation of gene expression	247	1826	0.19	1.01e-08	9606.ENSP00000157812,9606.ENSP00000166139,9606.ENSP00000198767,9606.ENSP00000199320,9606.ENSP00000200453,9606.ENSP00000212015,9606.ENSP00000216037,9606.ENSP00000216252,9606.ENSP00000216797,9606.ENSP00000220429,9606.ENSP00000220751,9606.ENSP00000221452,9606.ENSP00000222553,9606.ENSP00000223095,9606.ENSP00000224140,9606.ENSP00000226574,9606.ENSP00000228437,9606.ENSP00000228515,9606.ENSP00000234170,…	PSMC4,FSTL3,RRN3,DIMT1,PPP1R15A,SIRT1,XBP1,PHF5A,NFKBIA,GABPB1,RIPK2,RELB,NAMPT,SERPINE1,SETX,NFKB1,PRDM4,CSRNP2,CEBPZ,DLX2,PRDM2,TBPL1,ATAD2B,ELF1,SNAI1,IRF1,INSIG2,FOSB,PLAGL2,NR1D1,TICAM1,LIF,DLL4,EAPP,PBX4,RAF1,MED17,JUND,SESN2,KDM6B,MED10,ADAM19,AKIRIN2,RIPK1,THBS1,LHX5,TMED2,NLRC5,ELL,C19orf10,EPC1,IL1A,ARID3A,ACVR1,CCNT2,ARID4B,FOSL2,GPBP1,PPARGC1A,LEF1,CREM,GTF2H1,TEF,WDR61,TAF4B,MEF2D,CS…
GO:0006366	transcription by RNA polymerase II	130	784	0.28	1.2e-08	9606.ENSP00000212015,9606.ENSP00000216037,9606.ENSP00000216294,9606.ENSP00000217109,9606.ENSP00000224140,9606.ENSP00000226574,9606.ENSP00000228437,9606.ENSP00000228515,9606.ENSP00000234170,9606.ENSP00000234198,9606.ENSP00000235372,9606.ENSP00000237264,9606.ENSP00000237853,9606.ENSP00000239882,9606.ENSP00000245414,9606.ENSP00000245919,9606.ENSP00000246229,9606.ENSP00000246672,9606.ENSP00000251203,…	SIRT1,XBP1,SNAPC1,CSTF1,SETX,NFKB1,PRDM4,CSRNP2,CEBPZ,DLX2,PRDM2,TBPL1,ELL2,ELF1,IRF1,FOSB,PLAGL2,NR1D1,PBX4,MED17,JUND,MED10,ELP3,BACH2,ELL,MED15,MED26,ARID3A,CCNT2,FOSL2,PPARGC1A,LEF1,GTF2H1,GMEB2,TEF,TRIP11,WDR61,TAF4B,MEF2D,SNRPG,CSRNP1,EAF2,NRBF2,CCRN4L,GTF2E1,BATF,PPARG,MED8,MED27,ZSCAN21,REL,MITF,NFIL3,PCF11,SNAPC4,RUNX1,CEBPB,PPM1D,NR1D2,FOSL1,INTS6,PPARD,ELF4,TFE3,LSM10,GRHL1,SMAD3,ZNF20…
GO:1903508	positive regulation of nucleic acid-templated transcription	213	1520	0.2	1.6e-08	9606.ENSP00000157812,9606.ENSP00000166139,9606.ENSP00000198767,9606.ENSP00000212015,9606.ENSP00000216037,9606.ENSP00000216252,9606.ENSP00000216797,9606.ENSP00000220429,9606.ENSP00000220751,9606.ENSP00000221452,9606.ENSP00000222553,9606.ENSP00000223095,9606.ENSP00000224140,9606.ENSP00000226574,9606.ENSP00000228437,9606.ENSP00000228515,9606.ENSP00000234170,9606.ENSP00000234198,9606.ENSP00000235372,…	PSMC4,FSTL3,RRN3,SIRT1,XBP1,PHF5A,NFKBIA,GABPB1,RIPK2,RELB,NAMPT,SERPINE1,SETX,NFKB1,PRDM4,CSRNP2,CEBPZ,DLX2,PRDM2,TBPL1,ATAD2B,ELF1,SNAI1,IRF1,INSIG2,FOSB,PLAGL2,NR1D1,LIF,EAPP,PBX4,RAF1,MED17,JUND,SESN2,KDM6B,MED10,AKIRIN2,RIPK1,LHX5,NLRC5,ELL,C19orf10,EPC1,IL1A,MED26,ARID3A,ACVR1,CCNT2,ARID4B,FOSL2,GPBP1,PPARGC1A,LEF1,CREM,GTF2H1,GMEB2,TEF,TRIP11,WDR61,TAF4B,MEF2D,CSRNP1,EAF2,CDKN2B,PPRC1,NIPB…
GO:0032268	regulation of cellular protein metabolic process	314	2486	0.16	2.1e-08	9606.ENSP00000013125,9606.ENSP00000014914,9606.ENSP00000157812,9606.ENSP00000158771,9606.ENSP00000171111,9606.ENSP00000185150,9606.ENSP00000200453,9606.ENSP00000209728,9606.ENSP00000212015,9606.ENSP00000215631,9606.ENSP00000216037,9606.ENSP00000216489,9606.ENSP00000216797,9606.ENSP00000217958,9606.ENSP00000220325,9606.ENSP00000220751,9606.ENSP00000221566,9606.ENSP00000223095,9606.ENSP00000226574,…	MAP4K5,GPRC5A,PSMC4,DERL2,KEAP1,ERLEC1,PPP1R15A,CDC6,SIRT1,GADD45B,XBP1,ALKBH1,NFKBIA,PSMD10,EHD4,RIPK2,SGTA,SERPINE1,NFKB1,GCLC,HBEGF,RGS2,DUSP1,EREG,TICAM1,LIF,FXR2,EGLN3,CHRNA10,MKNK2,RAF1,GADD45G,GDF15,CEP85,SESN2,PPIL4,EIF2S1,ELP3,IRAK2,AKIRIN2,RIPK1,SDCBP,DCUN1D5,THBS1,CCND2,SEMA7A,MMD,N4BP1,TRAF4,PRDX1,C19orf10,MAP3K8,BIRC3,ACVR1,MAP4K3,CCNT2,MUL1,ALS2,RAPGEF2,DNAJC27,ICAM1,PPARGC1A,MAP3K1…
GO:0051246	regulation of protein metabolic process	332	2668	0.15	2.57e-08	9606.ENSP00000013125,9606.ENSP00000014914,9606.ENSP00000157812,9606.ENSP00000158771,9606.ENSP00000171111,9606.ENSP00000185150,9606.ENSP00000200453,9606.ENSP00000209728,9606.ENSP00000212015,9606.ENSP00000215631,9606.ENSP00000216037,9606.ENSP00000216117,9606.ENSP00000216489,9606.ENSP00000216797,9606.ENSP00000217958,9606.ENSP00000220325,9606.ENSP00000220751,9606.ENSP00000221566,9606.ENSP00000223095,…	MAP4K5,GPRC5A,PSMC4,DERL2,KEAP1,ERLEC1,PPP1R15A,CDC6,SIRT1,GADD45B,XBP1,HMOX1,ALKBH1,NFKBIA,PSMD10,EHD4,RIPK2,SGTA,SERPINE1,NFKB1,GCLC,HBEGF,ODC1,RGS2,DUSP1,EREG,IRF1,TICAM1,LIF,FXR2,EGLN3,CHRNA10,MKNK2,RAF1,GADD45G,GDF15,CEP85,SESN2,PPIL4,EIF2S1,ELP3,IRAK2,AKIRIN2,RIPK1,SDCBP,DCUN1D5,THBS1,CCND2,LIPG,SEMA7A,MMD,N4BP1,TRAF4,PRDX1,C19orf10,MAP3K8,IL1A,BIRC3,ACVR1,MAP4K3,CCNT2,MUL1,ALS2,RAPGEF2,ASB…
GO:0045935	positive regulation of nucleobase-containing compound metabolic process	238	1770	0.19	3.61e-08	9606.ENSP00000157812,9606.ENSP00000166139,9606.ENSP00000179259,9606.ENSP00000198767,9606.ENSP00000199320,9606.ENSP00000212015,9606.ENSP00000216037,9606.ENSP00000216252,9606.ENSP00000216797,9606.ENSP00000220429,9606.ENSP00000220751,9606.ENSP00000221452,9606.ENSP00000222553,9606.ENSP00000223095,9606.ENSP00000224140,9606.ENSP00000226574,9606.ENSP00000228437,9606.ENSP00000228515,9606.ENSP00000230361,…	PSMC4,FSTL3,C12orf5,RRN3,DIMT1,SIRT1,XBP1,PHF5A,NFKBIA,GABPB1,RIPK2,RELB,NAMPT,SERPINE1,SETX,NFKB1,PRDM4,CSRNP2,GUCA1B,CEBPZ,DLX2,MSH6,PRDM2,TBPL1,ATAD2B,ELF1,SNAI1,EREG,IRF1,INSIG2,FOSB,PLAGL2,NR1D1,LIF,EAPP,PBX4,RAF1,MED17,JUND,SESN2,KDM6B,MED10,AKIRIN2,RIPK1,LHX5,NLRC5,ELL,C19orf10,EPC1,IL1A,MED26,ARID3A,ACVR1,CCNT2,ARID4B,FOSL2,GPBP1,PPARGC1A,LEF1,UBE2B,CREM,GTF2H1,GMEB2,TEF,TRIP11,WDR61,TAF4…
GO:0031328	positive regulation of cellular biosynthetic process	245	1846	0.18	5.66e-08	9606.ENSP00000157812,9606.ENSP00000166139,9606.ENSP00000198767,9606.ENSP00000200453,9606.ENSP00000212015,9606.ENSP00000216037,9606.ENSP00000216117,9606.ENSP00000216252,9606.ENSP00000216797,9606.ENSP00000220429,9606.ENSP00000220751,9606.ENSP00000221452,9606.ENSP00000222553,9606.ENSP00000223095,9606.ENSP00000224140,9606.ENSP00000226574,9606.ENSP00000228437,9606.ENSP00000228515,9606.ENSP00000230361,…	PSMC4,FSTL3,RRN3,PPP1R15A,SIRT1,XBP1,HMOX1,PHF5A,NFKBIA,GABPB1,RIPK2,RELB,NAMPT,SERPINE1,SETX,NFKB1,PRDM4,CSRNP2,GUCA1B,CEBPZ,DLX2,PRDM2,TBPL1,ATAD2B,ELF1,SNAI1,EREG,IRF1,INSIG2,FOSB,PLAGL2,NR1D1,TICAM1,LIF,EAPP,PBX4,RAF1,MED17,JUND,SESN2,KDM6B,MED10,AKIRIN2,RIPK1,THBS1,LHX5,NLRC5,ELL,C19orf10,EPC1,IL1A,MED26,ARID3A,ACVR1,CCNT2,ARID4B,FOSL2,GPBP1,ICAM1,PPARGC1A,LEF1,CREM,GTF2H1,GMEB2,TEF,TRIP11,W…
GO:0080134	regulation of response to stress	186	1299	0.21	5.66e-08	9606.ENSP00000013125,9606.ENSP00000158771,9606.ENSP00000179259,9606.ENSP00000185150,9606.ENSP00000200453,9606.ENSP00000212015,9606.ENSP00000215631,9606.ENSP00000216037,9606.ENSP00000216797,9606.ENSP00000217958,9606.ENSP00000220751,9606.ENSP00000221452,9606.ENSP00000221566,9606.ENSP00000223095,9606.ENSP00000226574,9606.ENSP00000229332,9606.ENSP00000230990,9606.ENSP00000244050,9606.ENSP00000244869,…	MAP4K5,DERL2,C12orf5,ERLEC1,PPP1R15A,SIRT1,GADD45B,XBP1,NFKBIA,PSMD10,RIPK2,RELB,SGTA,SERPINE1,NFKB1,CLEC4A,HBEGF,SNAI1,EREG,IRF1,NR1D1,TICAM1,DNAJB9,RAF1,MICB,GADD45G,SESN2,DNAJB1,IRAK2,TRAFD1,RINT1,RIPK1,IER3,SDCBP,THBS1,SEMA7A,PIK3C3,TRAF4,NLRC5,VAMP7,PRDX1,UFD1L,BIRC3,MUL1,MGLL,HPX,PLK2,PPP4C,FBXW7,HSPB8,SH3RF1,PPARG,IFNGR2,FGF19,SENP2,F2RL1,TSC1,HSP90B1,TERF2IP,CRK,IL12A,ADORA2B,PRKCE,EIF2AK…
GO:0050789	regulation of biological process	1104	11116	0.05	6.02e-08	9606.ENSP00000013125,9606.ENSP00000014914,9606.ENSP00000033079,9606.ENSP00000054650,9606.ENSP00000064780,9606.ENSP00000157600,9606.ENSP00000157812,9606.ENSP00000158771,9606.ENSP00000166139,9606.ENSP00000171111,9606.ENSP00000179259,9606.ENSP00000185150,9606.ENSP00000196489,9606.ENSP00000198767,9606.ENSP00000199320,9606.ENSP00000200453,9606.ENSP00000202556,9606.ENSP00000209728,9606.ENSP00000211936,…	MAP4K5,GPRC5A,FAM13B,THAP3,RELT,LMCD1,PSMC4,DERL2,FSTL3,KEAP1,C12orf5,ERLEC1,ZNF416,RRN3,DIMT1,PPP1R15A,PPP1R13B,CDC6,ZNF184,SIRT1,GADD45B,PDXP,XBP1,HMOX1,PHF5A,SNAPC1,SOS2,CGRRF1,ALKBH1,NFKBIA,TPD52L2,CHMP4B,PSMD10,KCND1,GLA,EHD4,GABPB1,RHOV,VPS18,BLOC1S6,BRF2,RIPK2,GSR,RELB,SGTA,ERF,NAMPT,FKBP14,SERPINE1,CHMP5,SETX,PPIF,RASD1,AKAP10,NFKB1,IL10RA,PRDM4,CSRNP2,CYP27B1,CLEC4A,GCLC,MDFI,GUCA1B,HBEG…
GO:0010557	positive regulation of macromolecule biosynthetic process	235	1758	0.18	7.31e-08	9606.ENSP00000157812,9606.ENSP00000166139,9606.ENSP00000198767,9606.ENSP00000200453,9606.ENSP00000212015,9606.ENSP00000216037,9606.ENSP00000216117,9606.ENSP00000216252,9606.ENSP00000216797,9606.ENSP00000220429,9606.ENSP00000220751,9606.ENSP00000221452,9606.ENSP00000222553,9606.ENSP00000223095,9606.ENSP00000224140,9606.ENSP00000226574,9606.ENSP00000228437,9606.ENSP00000228515,9606.ENSP00000234170,…	PSMC4,FSTL3,RRN3,PPP1R15A,SIRT1,XBP1,HMOX1,PHF5A,NFKBIA,GABPB1,RIPK2,RELB,NAMPT,SERPINE1,SETX,NFKB1,PRDM4,CSRNP2,CEBPZ,DLX2,PRDM2,TBPL1,ATAD2B,ELF1,SNAI1,EREG,IRF1,INSIG2,FOSB,PLAGL2,NR1D1,TICAM1,LIF,EAPP,PBX4,RAF1,MED17,JUND,SESN2,KDM6B,MED10,AKIRIN2,RIPK1,THBS1,LHX5,NLRC5,ELL,C19orf10,EPC1,IL1A,MED26,ARID3A,ACVR1,CCNT2,ARID4B,FOSL2,GPBP1,PPARGC1A,LEF1,CREM,GTF2H1,GMEB2,TEF,TRIP11,WDR61,TAF4B,ME…
GO:0045893	positive regulation of transcription, DNA-templated	200	1435	0.2	8.31e-08	9606.ENSP00000157812,9606.ENSP00000166139,9606.ENSP00000198767,9606.ENSP00000212015,9606.ENSP00000216037,9606.ENSP00000216252,9606.ENSP00000216797,9606.ENSP00000220429,9606.ENSP00000220751,9606.ENSP00000221452,9606.ENSP00000222553,9606.ENSP00000223095,9606.ENSP00000224140,9606.ENSP00000226574,9606.ENSP00000228437,9606.ENSP00000228515,9606.ENSP00000234170,9606.ENSP00000234198,9606.ENSP00000235372,…	PSMC4,FSTL3,RRN3,SIRT1,XBP1,PHF5A,NFKBIA,GABPB1,RIPK2,RELB,NAMPT,SERPINE1,SETX,NFKB1,PRDM4,CSRNP2,CEBPZ,DLX2,PRDM2,TBPL1,ATAD2B,ELF1,SNAI1,IRF1,INSIG2,FOSB,PLAGL2,NR1D1,LIF,EAPP,PBX4,RAF1,MED17,JUND,SESN2,KDM6B,MED10,AKIRIN2,RIPK1,LHX5,NLRC5,ELL,C19orf10,EPC1,IL1A,ARID3A,ACVR1,CCNT2,ARID4B,FOSL2,GPBP1,PPARGC1A,LEF1,CREM,GTF2H1,TEF,WDR61,TAF4B,MEF2D,CSRNP1,EAF2,CDKN2B,PPRC1,NIPBL,FLCN,BATF,PPARG,I…
GO:0009891	positive regulation of biosynthetic process	247	1876	0.18	8.71e-08	9606.ENSP00000157812,9606.ENSP00000166139,9606.ENSP00000198767,9606.ENSP00000200453,9606.ENSP00000212015,9606.ENSP00000216037,9606.ENSP00000216117,9606.ENSP00000216252,9606.ENSP00000216797,9606.ENSP00000220429,9606.ENSP00000220751,9606.ENSP00000221452,9606.ENSP00000222553,9606.ENSP00000223095,9606.ENSP00000224140,9606.ENSP00000226574,9606.ENSP00000228437,9606.ENSP00000228515,9606.ENSP00000230361,…	PSMC4,FSTL3,RRN3,PPP1R15A,SIRT1,XBP1,HMOX1,PHF5A,NFKBIA,GABPB1,RIPK2,RELB,NAMPT,SERPINE1,SETX,NFKB1,PRDM4,CSRNP2,GUCA1B,CEBPZ,DLX2,PRDM2,TBPL1,ATAD2B,ELF1,SNAI1,EREG,IRF1,INSIG2,FOSB,PLAGL2,NR1D1,TICAM1,LIF,EAPP,PBX4,RAF1,MED17,JUND,SESN2,KDM6B,MED10,AKIRIN2,RIPK1,THBS1,LHX5,NLRC5,ELL,C19orf10,EPC1,IL1A,MED26,ARID3A,ACVR1,CCNT2,ARID4B,FOSL2,GPBP1,ICAM1,PPARGC1A,LEF1,CREM,GTF2H1,GMEB2,TEF,TRIP11,W…
GO:0048522	positive regulation of cellular process	545	4898	0.1	1.12e-07	9606.ENSP00000013125,9606.ENSP00000157600,9606.ENSP00000157812,9606.ENSP00000158771,9606.ENSP00000166139,9606.ENSP00000171111,9606.ENSP00000179259,9606.ENSP00000198767,9606.ENSP00000199320,9606.ENSP00000200453,9606.ENSP00000202556,9606.ENSP00000209728,9606.ENSP00000212015,9606.ENSP00000215631,9606.ENSP00000215904,9606.ENSP00000216037,9606.ENSP00000216117,9606.ENSP00000216252,9606.ENSP00000216373,…	MAP4K5,LMCD1,PSMC4,DERL2,FSTL3,KEAP1,C12orf5,RRN3,DIMT1,PPP1R15A,PPP1R13B,CDC6,SIRT1,GADD45B,PDXP,XBP1,HMOX1,PHF5A,SOS2,NFKBIA,PSMD10,EHD4,GABPB1,BLOC1S6,RIPK2,RELB,SGTA,NAMPT,SERPINE1,SETX,PPIF,NFKB1,PRDM4,CSRNP2,CYP27B1,GCLC,GUCA1B,HBEGF,ODC1,CEBPZ,DLX2,MSH6,PRDM2,RGS2,TBPL1,ATAD2B,DUSP1,ELF1,SNAI1,EREG,IRF1,INSIG2,TNFSF9,FOSB,PLAGL2,NR1D1,TICAM1,LIF,DLL4,EAPP,EGLN3,PBX4,RAF1,MED17,GADD45G,GDF1…
GO:0065007	biological regulation	1154	11740	0.05	1.31e-07	9606.ENSP00000009041,9606.ENSP00000013125,9606.ENSP00000014914,9606.ENSP00000033079,9606.ENSP00000054650,9606.ENSP00000064780,9606.ENSP00000157600,9606.ENSP00000157812,9606.ENSP00000158771,9606.ENSP00000166139,9606.ENSP00000171111,9606.ENSP00000179259,9606.ENSP00000185150,9606.ENSP00000196489,9606.ENSP00000198767,9606.ENSP00000199320,9606.ENSP00000200453,9606.ENSP00000202556,9606.ENSP00000209728,…	STARD3NL,MAP4K5,GPRC5A,FAM13B,THAP3,RELT,LMCD1,PSMC4,DERL2,FSTL3,KEAP1,C12orf5,ERLEC1,ZNF416,RRN3,DIMT1,PPP1R15A,PPP1R13B,CDC6,ZNF184,SIRT1,GADD45B,PDXP,XBP1,HMOX1,PHF5A,SNAPC1,SOS2,CGRRF1,ALKBH1,NFKBIA,TPD52L2,CHMP4B,PSMD10,KCND1,GLA,EHD4,GABPB1,RHOV,VPS18,BLOC1S6,BRF2,RIPK2,GSR,RELB,SGTA,ERF,NAMPT,FKBP14,SERPINE1,CHMP5,SETX,PPIF,RASD1,AKAP10,NFKB1,IL10RA,PRDM4,CSRNP2,CYP27B1,CLEC4A,GCLC,MDFI,GU…
GO:0035967	cellular response to topologically incorrect protein	39	132	0.53	2.12e-07	9606.ENSP00000158771,9606.ENSP00000216037,9606.ENSP00000222803,9606.ENSP00000247020,9606.ENSP00000248958,9606.ENSP00000249356,9606.ENSP00000256383,9606.ENSP00000260643,9606.ENSP00000262139,9606.ENSP00000262947,9606.ENSP00000263202,9606.ENSP00000299767,9606.ENSP00000306512,9606.ENSP00000307235,9606.ENSP00000307260,9606.ENSP00000314615,9606.ENSP00000320866,9606.ENSP00000323313,9606.ENSP00000324173,…	DERL2,XBP1,FKBP14,SDF2,SDF2L1,DNAJB9,EIF2S1,PREB,WIPI1,C19orf10,UFD1L,HSP90B1,CXCL8,EIF2AK3,TBL2,ARFGAP1,CALR,PDIA5,HSPA5,YOD1,SRPR,CREB3,ATF3,VCP,PTPN1,BAK1,TSPYL2,ZBTB17,SYVN1,OPTN,SEC31A,NFE2L2,VIMP,KDELR3,HERPUD1,SRPRB,DDIT3,DNAJC3,BHLHA15
GO:0030968	endoplasmic reticulum unfolded protein response	34	103	0.58	2.2e-07	9606.ENSP00000158771,9606.ENSP00000216037,9606.ENSP00000222803,9606.ENSP00000249356,9606.ENSP00000256383,9606.ENSP00000260643,9606.ENSP00000262139,9606.ENSP00000262947,9606.ENSP00000299767,9606.ENSP00000306512,9606.ENSP00000307235,9606.ENSP00000307260,9606.ENSP00000314615,9606.ENSP00000320866,9606.ENSP00000323313,9606.ENSP00000324173,9606.ENSP00000326813,9606.ENSP00000328023,9606.ENSP00000342136,…	DERL2,XBP1,FKBP14,DNAJB9,EIF2S1,PREB,WIPI1,C19orf10,HSP90B1,CXCL8,EIF2AK3,TBL2,ARFGAP1,CALR,PDIA5,HSPA5,YOD1,SRPR,CREB3,ATF3,VCP,PTPN1,TSPYL2,ZBTB17,SYVN1,SEC31A,NFE2L2,VIMP,KDELR3,HERPUD1,SRPRB,DDIT3,DNAJC3,BHLHA15
GO:0034620	cellular response to unfolded protein	36	115	0.55	2.39e-07	9606.ENSP00000158771,9606.ENSP00000216037,9606.ENSP00000222803,9606.ENSP00000249356,9606.ENSP00000256383,9606.ENSP00000260643,9606.ENSP00000262139,9606.ENSP00000262947,9606.ENSP00000299767,9606.ENSP00000306512,9606.ENSP00000307235,9606.ENSP00000307260,9606.ENSP00000314615,9606.ENSP00000320866,9606.ENSP00000323313,9606.ENSP00000324173,9606.ENSP00000326813,9606.ENSP00000328023,9606.ENSP00000342136,…	DERL2,XBP1,FKBP14,DNAJB9,EIF2S1,PREB,WIPI1,C19orf10,HSP90B1,CXCL8,EIF2AK3,TBL2,ARFGAP1,CALR,PDIA5,HSPA5,YOD1,SRPR,CREB3,ATF3,VCP,PTPN1,BAK1,TSPYL2,ZBTB17,SYVN1,OPTN,SEC31A,NFE2L2,VIMP,KDELR3,HERPUD1,SRPRB,DDIT3,DNAJC3,BHLHA15
GO:0031324	negative regulation of cellular metabolic process	304	2463	0.15	3.35e-07	9606.ENSP00000014914,9606.ENSP00000157600,9606.ENSP00000158771,9606.ENSP00000179259,9606.ENSP00000185150,9606.ENSP00000200453,9606.ENSP00000209728,9606.ENSP00000212015,9606.ENSP00000215631,9606.ENSP00000216037,9606.ENSP00000216117,9606.ENSP00000217402,9606.ENSP00000217958,9606.ENSP00000218516,9606.ENSP00000221452,9606.ENSP00000221566,9606.ENSP00000222329,9606.ENSP00000223095,9606.ENSP00000225174,…	GPRC5A,LMCD1,DERL2,C12orf5,ERLEC1,PPP1R15A,CDC6,SIRT1,GADD45B,XBP1,HMOX1,CHMP4B,PSMD10,GLA,RELB,SGTA,ERF,SERPINE1,PPIF,RASD1,NFKB1,CSRNP2,CYP27B1,GCLC,MDFI,HBEGF,DLX2,MSH6,RGS2,DUSP1,BHLHE41,ORMDL2,SNAI1,MPHOSPH10,EREG,IRF1,INSIG2,FOSB,NR1D1,LIF,DLL4,FXR2,EAPP,CHRNA10,RAF1,JUND,CEP85,SESN2,ZCCHC9,THAP1,DNAJB1,RRP8,H3F3B,EIF2S1,MBD2,BHLHE40,BACH2,AKIRIN2,SDCBP,USP2,THBS1,TRIM37,N4BP1,ACIN1,ELL,EPC…
GO:0006950	response to stress	384	3267	0.13	3.62e-07	9606.ENSP00000013125,9606.ENSP00000064780,9606.ENSP00000157812,9606.ENSP00000158771,9606.ENSP00000179259,9606.ENSP00000185150,9606.ENSP00000200453,9606.ENSP00000212015,9606.ENSP00000215631,9606.ENSP00000216037,9606.ENSP00000216117,9606.ENSP00000216489,9606.ENSP00000216797,9606.ENSP00000220659,9606.ENSP00000220751,9606.ENSP00000221130,9606.ENSP00000221452,9606.ENSP00000221566,9606.ENSP00000222803,…	MAP4K5,RELT,PSMC4,DERL2,C12orf5,ERLEC1,PPP1R15A,SIRT1,GADD45B,XBP1,HMOX1,ALKBH1,NFKBIA,BRF2,RIPK2,GSR,RELB,SGTA,FKBP14,SERPINE1,SETX,PPIF,AKAP10,NFKB1,CYP27B1,CLEC4A,FGFR1OP2,GCLC,HBEGF,TUSC2,MSH6,RNF103,DUSP1,EREG,IRF1,INSIG2,PITHD1,SDF2,TICAM1,SDF2L1,DNAJB9,EGLN3,RAF1,MICB,GADD45G,SESN2,DNAJB1,RRP8,H3F3B,KDM6B,IGHMBP2,BTG1,EIF2S1,IRAK2,OASL,AKIRIN2,LRRC8A,TOR1B,RIPK1,THBS1,PREB,SEMA7A,FAF2,PIK3…
GO:0045944	positive regulation of transcription by RNA polymerase II	160	1104	0.22	4.18e-07	9606.ENSP00000157812,9606.ENSP00000166139,9606.ENSP00000212015,9606.ENSP00000216037,9606.ENSP00000216797,9606.ENSP00000220429,9606.ENSP00000220751,9606.ENSP00000221452,9606.ENSP00000222553,9606.ENSP00000223095,9606.ENSP00000224140,9606.ENSP00000226574,9606.ENSP00000228437,9606.ENSP00000228515,9606.ENSP00000234170,9606.ENSP00000234198,9606.ENSP00000235372,9606.ENSP00000237264,9606.ENSP00000238789,…	PSMC4,FSTL3,SIRT1,XBP1,NFKBIA,GABPB1,RIPK2,RELB,NAMPT,SERPINE1,SETX,NFKB1,PRDM4,CSRNP2,CEBPZ,DLX2,PRDM2,TBPL1,ATAD2B,ELF1,IRF1,INSIG2,FOSB,PLAGL2,LIF,EAPP,RAF1,MED17,JUND,SESN2,KDM6B,MED10,AKIRIN2,RIPK1,NLRC5,ELL,C19orf10,EPC1,IL1A,ARID3A,ACVR1,CCNT2,ARID4B,FOSL2,PPARGC1A,LEF1,CREM,GTF2H1,TEF,WDR61,TAF4B,MEF2D,CSRNP1,EAF2,CDKN2B,PPRC1,NIPBL,FLCN,BATF,PPARG,ZSCAN21,REL,MITF,CCNL1,SENP2,F2RL1,RUNX1…
GO:0031399	regulation of protein modification process	229	1747	0.17	5.05e-07	9606.ENSP00000013125,9606.ENSP00000014914,9606.ENSP00000200453,9606.ENSP00000209728,9606.ENSP00000212015,9606.ENSP00000215631,9606.ENSP00000216037,9606.ENSP00000217958,9606.ENSP00000220325,9606.ENSP00000220751,9606.ENSP00000229416,9606.ENSP00000230990,9606.ENSP00000235382,9606.ENSP00000239223,9606.ENSP00000244869,9606.ENSP00000248244,9606.ENSP00000249075,9606.ENSP00000250699,9606.ENSP00000251849,…	MAP4K5,GPRC5A,PPP1R15A,CDC6,SIRT1,GADD45B,XBP1,PSMD10,EHD4,RIPK2,GCLC,HBEGF,RGS2,DUSP1,EREG,TICAM1,LIF,CHRNA10,RAF1,GADD45G,GDF15,CEP85,SESN2,PPIL4,ELP3,IRAK2,RIPK1,SDCBP,DCUN1D5,THBS1,CCND2,SEMA7A,MMD,N4BP1,TRAF4,PRDX1,C19orf10,MAP3K8,BIRC3,ACVR1,MAP4K3,CCNT2,MUL1,ALS2,RAPGEF2,DNAJC27,ICAM1,PPARGC1A,MAP3K13,ARRDC3,UBE2B,MAPKAP1,GTF2H1,HPX,JDP2,WDR61,ARRDC4,AKAP8,TNFRSF10B,CDKN2B,FBXW7,NIPBL,PTPR…
GO:0009892	negative regulation of metabolic process	331	2762	0.14	9.71e-07	9606.ENSP00000014914,9606.ENSP00000157600,9606.ENSP00000158771,9606.ENSP00000179259,9606.ENSP00000185150,9606.ENSP00000200453,9606.ENSP00000209728,9606.ENSP00000212015,9606.ENSP00000215631,9606.ENSP00000216037,9606.ENSP00000216117,9606.ENSP00000217402,9606.ENSP00000217958,9606.ENSP00000218516,9606.ENSP00000221452,9606.ENSP00000221566,9606.ENSP00000222329,9606.ENSP00000223095,9606.ENSP00000225174,…	GPRC5A,LMCD1,DERL2,C12orf5,ERLEC1,PPP1R15A,CDC6,SIRT1,GADD45B,XBP1,HMOX1,CHMP4B,PSMD10,GLA,RELB,SGTA,ERF,SERPINE1,PPIF,RASD1,NFKB1,CSRNP2,CYP27B1,GCLC,MDFI,HBEGF,DLX2,MSH6,RGS2,DUSP1,BHLHE41,ORMDL2,SNAI1,MPHOSPH10,EREG,IRF1,INSIG2,FOSB,NR1D1,LIF,DLL4,FXR2,EAPP,CHRNA10,RAF1,JUND,CEP85,SESN2,ZCCHC9,THAP1,DNAJB1,RRP8,H3F3B,EIF2S1,MBD2,BHLHE40,BACH2,AKIRIN2,SDCBP,USP2,THBS1,TRIM37,N4BP1,ACIN1,ELL,EPC…
GO:0051726	regulation of cell cycle	161	1129	0.21	9.71e-07	9606.ENSP00000013125,9606.ENSP00000200453,9606.ENSP00000202556,9606.ENSP00000209728,9606.ENSP00000212015,9606.ENSP00000215631,9606.ENSP00000215904,9606.ENSP00000216420,9606.ENSP00000217402,9606.ENSP00000217958,9606.ENSP00000223500,9606.ENSP00000239223,9606.ENSP00000244869,9606.ENSP00000245414,9606.ENSP00000248437,9606.ENSP00000249075,9606.ENSP00000252506,9606.ENSP00000252818,9606.ENSP00000252992,…	MAP4K5,PPP1R15A,PPP1R13B,CDC6,SIRT1,GADD45B,PDXP,CGRRF1,CHMP4B,PSMD10,CHMP5,DUSP1,EREG,IRF1,TUBA4A,LIF,GADD45G,JUND,CEP85,PRKAB2,THAP1,RRP8,RINT1,TBRG4,SDCBP,USP2,THBS1,HAUS2,CCND2,PIK3C3,TRIM37,MAP3K8,EPC1,IL1A,ARID3A,MAP4K3,CCNT2,LEF1,UBE2B,GTF2H1,SIK1,RHOB,DYNC1LI1,PLK2,CDKN2B,ORAOV1,FBXW7,TRIM36,RIOK2,FLCN,WHAMM,NSMCE2,PRKAG2,TGFA,CCNL1,SENP2,TSC1,TUBA1A,LIN37,CDK2AP2,IL12A,CDC25A,PRKCE,SLC25…
GO:0080135	regulation of cellular response to stress	102	618	0.27	1.21e-06	9606.ENSP00000013125,9606.ENSP00000158771,9606.ENSP00000179259,9606.ENSP00000185150,9606.ENSP00000200453,9606.ENSP00000212015,9606.ENSP00000215631,9606.ENSP00000216037,9606.ENSP00000217958,9606.ENSP00000220751,9606.ENSP00000221566,9606.ENSP00000244050,9606.ENSP00000249356,9606.ENSP00000252506,9606.ENSP00000254322,9606.ENSP00000257700,9606.ENSP00000259808,9606.ENSP00000259874,9606.ENSP00000260130,…	MAP4K5,DERL2,C12orf5,ERLEC1,PPP1R15A,SIRT1,GADD45B,XBP1,PSMD10,RIPK2,SGTA,SNAI1,DNAJB9,GADD45G,DNAJB1,RINT1,RIPK1,IER3,SDCBP,TRAF4,PRDX1,MUL1,PLK2,PPP4C,FBXW7,HSPB8,SH3RF1,FGF19,SENP2,F2RL1,TSC1,TERF2IP,EIF2AK3,ZNF622,PER1,CLU,HSPH1,CHORDC1,HSPA5,KARS,PMAIP1,YOD1,P4HB,NDEL1,HSP90AA1,CAV1,CREB3,INSIG1,PPP4R2,LRIG2,DUSP10,DYRK3,PPP1R15B,IER5,CTGF,MCL1,BAG3,GADD45A,PTPN1,ANKRD1,ZC3H12A,DKK1,BAK1,KLF…
GO:0002831	regulation of response to biotic stimulus	78	426	0.32	1.49e-06	9606.ENSP00000179259,9606.ENSP00000216797,9606.ENSP00000220751,9606.ENSP00000221452,9606.ENSP00000226574,9606.ENSP00000229332,9606.ENSP00000244869,9606.ENSP00000245414,9606.ENSP00000246672,9606.ENSP00000248244,9606.ENSP00000251849,9606.ENSP00000252229,9606.ENSP00000256458,9606.ENSP00000257604,9606.ENSP00000259808,9606.ENSP00000262039,9606.ENSP00000262510,9606.ENSP00000263202,9606.ENSP00000263464,…	C12orf5,NFKBIA,RIPK2,RELB,NFKB1,CLEC4A,EREG,IRF1,NR1D1,TICAM1,RAF1,MICB,IRAK2,TRAFD1,RIPK1,PIK3C3,NLRC5,UFD1L,BIRC3,MUL1,HPX,PPARG,IFNGR2,F2RL1,HSP90B1,CRK,IL12A,PRKCE,TRIB1,MALT1,IFNLR1,SOCS3,NPLOC4,POLR3C,CAV1,RIOK3,CREB3,PSPC1,TRIM38,ANKRD17,PELI1,GPATCH3,DUSP10,IFNGR1,PRDM1,CHUK,BCL10,PTPN1,ZC3H12A,PTAFR,HSPA1B,OPTN,DDX58,TRIM5,SERPINB9,GPS2,CD274,RSAD2,AP1G1,POLR3D,POLR3G,RELA,TLR6,CYLD,PVR,…
GO:0051172	negative regulation of nitrogen compound metabolic process	283	2307	0.15	2.07e-06	9606.ENSP00000014914,9606.ENSP00000157600,9606.ENSP00000158771,9606.ENSP00000179259,9606.ENSP00000185150,9606.ENSP00000200453,9606.ENSP00000209728,9606.ENSP00000212015,9606.ENSP00000215631,9606.ENSP00000216037,9606.ENSP00000217958,9606.ENSP00000218516,9606.ENSP00000221452,9606.ENSP00000221566,9606.ENSP00000222329,9606.ENSP00000223095,9606.ENSP00000225174,9606.ENSP00000225688,9606.ENSP00000226574,…	GPRC5A,LMCD1,DERL2,C12orf5,ERLEC1,PPP1R15A,CDC6,SIRT1,GADD45B,XBP1,PSMD10,GLA,RELB,SGTA,ERF,SERPINE1,PPIF,RASD1,NFKB1,GCLC,MDFI,HBEGF,DLX2,MSH6,RGS2,DUSP1,BHLHE41,ORMDL2,SNAI1,EREG,IRF1,FOSB,NR1D1,LIF,DLL4,FXR2,EAPP,CHRNA10,RAF1,JUND,CEP85,SESN2,THAP1,DNAJB1,RRP8,H3F3B,EIF2S1,MBD2,BHLHE40,BACH2,AKIRIN2,SDCBP,USP2,THBS1,TRIM37,N4BP1,ACIN1,EPC1,BIRC3,MXD1,ASB1,PPARGC1A,LEF1,UBE2B,CREM,BTAF1,JDP2,TN…
GO:1905897	regulation of response to endoplasmic reticulum stress	28	81	0.6	2.2e-06	9606.ENSP00000158771,9606.ENSP00000185150,9606.ENSP00000200453,9606.ENSP00000212015,9606.ENSP00000216037,9606.ENSP00000221566,9606.ENSP00000249356,9606.ENSP00000307235,9606.ENSP00000315130,9606.ENSP00000324173,9606.ENSP00000326119,9606.ENSP00000326813,9606.ENSP00000339191,9606.ENSP00000342136,9606.ENSP00000356156,9606.ENSP00000360683,9606.ENSP00000363591,9606.ENSP00000366395,9606.ENSP00000380252,…	DERL2,ERLEC1,PPP1R15A,SIRT1,XBP1,SGTA,DNAJB9,EIF2AK3,CLU,HSPA5,PMAIP1,YOD1,CAV1,CREB3,PPP1R15B,PTPN1,BAK1,SYVN1,NFE2L2,VIMP,USP25,HERPUD1,NCK1,MANF,FICD,DDIT3,UBE2J1,DNAJC3
GO:0048519	negative regulation of biological process	538	4953	0.09	3.45e-06	9606.ENSP00000014914,9606.ENSP00000157600,9606.ENSP00000158771,9606.ENSP00000166139,9606.ENSP00000171111,9606.ENSP00000179259,9606.ENSP00000185150,9606.ENSP00000198767,9606.ENSP00000200453,9606.ENSP00000202556,9606.ENSP00000209728,9606.ENSP00000212015,9606.ENSP00000215631,9606.ENSP00000216037,9606.ENSP00000216117,9606.ENSP00000216420,9606.ENSP00000216489,9606.ENSP00000216797,9606.ENSP00000217402,…	GPRC5A,LMCD1,DERL2,FSTL3,KEAP1,C12orf5,ERLEC1,RRN3,PPP1R15A,PPP1R13B,CDC6,SIRT1,GADD45B,XBP1,HMOX1,CGRRF1,ALKBH1,NFKBIA,CHMP4B,PSMD10,GLA,RIPK2,RELB,SGTA,ERF,SERPINE1,SETX,PPIF,RASD1,NFKB1,CSRNP2,CYP27B1,CLEC4A,GCLC,MDFI,HBEGF,BNIP1,TUSC2,DLX2,MSH6,RGS2,ATAD2B,DUSP1,ELF1,BHLHE41,ORMDL2,SNAI1,MPHOSPH10,EREG,IRF1,INSIG2,FOSB,NR1D1,WNK4,TICAM1,LIF,DNAJB9,DLL4,FXR2,EAPP,CHRNA10,RAF1,MICB,GDF15,JUND,C…
GO:0051247	positive regulation of protein metabolic process	207	1587	0.17	3.93e-06	9606.ENSP00000013125,9606.ENSP00000157812,9606.ENSP00000171111,9606.ENSP00000200453,9606.ENSP00000209728,9606.ENSP00000212015,9606.ENSP00000215631,9606.ENSP00000216037,9606.ENSP00000216117,9606.ENSP00000216797,9606.ENSP00000217958,9606.ENSP00000220325,9606.ENSP00000220751,9606.ENSP00000221566,9606.ENSP00000229416,9606.ENSP00000230990,9606.ENSP00000244869,9606.ENSP00000245414,9606.ENSP00000248244,…	MAP4K5,PSMC4,KEAP1,PPP1R15A,CDC6,SIRT1,GADD45B,XBP1,HMOX1,NFKBIA,PSMD10,EHD4,RIPK2,SGTA,GCLC,HBEGF,EREG,IRF1,TICAM1,LIF,EGLN3,RAF1,GADD45G,GDF15,IRAK2,AKIRIN2,RIPK1,SDCBP,DCUN1D5,THBS1,CCND2,SEMA7A,MMD,TRAF4,C19orf10,MAP3K8,IL1A,BIRC3,ACVR1,MAP4K3,CCNT2,MUL1,ALS2,RAPGEF2,DNAJC27,ICAM1,PPARGC1A,MAP3K13,ARRDC3,MAPKAP1,HPX,JDP2,WDR61,ARRDC4,AKAP8,PLK2,TNFRSF10B,FBXW7,NIPBL,SH3RF1,FLCN,NSMCE2,PPARG,P…
GO:0010605	negative regulation of macromolecule metabolic process	306	2558	0.14	4.41e-06	9606.ENSP00000014914,9606.ENSP00000157600,9606.ENSP00000158771,9606.ENSP00000185150,9606.ENSP00000200453,9606.ENSP00000209728,9606.ENSP00000212015,9606.ENSP00000215631,9606.ENSP00000216037,9606.ENSP00000217958,9606.ENSP00000221452,9606.ENSP00000221566,9606.ENSP00000222329,9606.ENSP00000223095,9606.ENSP00000225688,9606.ENSP00000226574,9606.ENSP00000229416,9606.ENSP00000230321,9606.ENSP00000230990,…	GPRC5A,LMCD1,DERL2,ERLEC1,PPP1R15A,CDC6,SIRT1,GADD45B,XBP1,PSMD10,RELB,SGTA,ERF,SERPINE1,RASD1,NFKB1,GCLC,MDFI,HBEGF,DLX2,MSH6,RGS2,DUSP1,BHLHE41,SNAI1,EREG,IRF1,FOSB,NR1D1,LIF,DLL4,FXR2,EAPP,CHRNA10,RAF1,JUND,CEP85,SESN2,THAP1,DNAJB1,RRP8,H3F3B,EIF2S1,MBD2,BHLHE40,BACH2,AKIRIN2,SDCBP,USP2,THBS1,TRIM37,N4BP1,ACIN1,EPC1,BIRC3,MXD1,ASB1,PPARGC1A,LEF1,UBE2B,CREM,BTAF1,JDP2,WDR61,PELO,TNFRSF10B,CDKN2…
GO:0006915	apoptotic process	133	915	0.22	6.95e-06	9606.ENSP00000064780,9606.ENSP00000179259,9606.ENSP00000200453,9606.ENSP00000202556,9606.ENSP00000212015,9606.ENSP00000215631,9606.ENSP00000216037,9606.ENSP00000216117,9606.ENSP00000216797,9606.ENSP00000217958,9606.ENSP00000220751,9606.ENSP00000225174,9606.ENSP00000226574,9606.ENSP00000228515,9606.ENSP00000229416,9606.ENSP00000231668,9606.ENSP00000234420,9606.ENSP00000238788,9606.ENSP00000245414,…	RELT,C12orf5,PPP1R15A,PPP1R13B,SIRT1,GADD45B,XBP1,HMOX1,NFKBIA,PSMD10,RIPK2,PPIF,NFKB1,CSRNP2,GCLC,BNIP1,MSH6,TMEM214,IRF1,TNFSF9,PLAGL2,TICAM1,EGLN3,MKNK2,RAF1,GADD45G,RRP8,RIPK1,IER3,TRAF4,ACIN1,C19orf10,IL1A,BIRC3,MUL1,LEF1,PHLDA1,MEF2D,RHOB,CSRNP1,EAF2,TNFRSF10B,SLC25A4,SH3RF1,IL12A,CEBPB,PRKCE,DDIT4,CYCS,ZNF622,TNFRSF10D,PPARD,CFLAR,DAB2,CLU,STK17A,PHLDA2,SIAH2,HSPA5,PMAIP1,TNFRSF12A,AEN,SMA…
GO:0070647	protein modification by small protein conjugation or removal	136	945	0.22	8.17e-06	9606.ENSP00000157812,9606.ENSP00000171111,9606.ENSP00000212015,9606.ENSP00000216039,9606.ENSP00000216797,9606.ENSP00000217958,9606.ENSP00000219313,9606.ENSP00000232766,9606.ENSP00000233630,9606.ENSP00000237281,9606.ENSP00000237455,9606.ENSP00000242719,9606.ENSP00000247977,9606.ENSP00000255304,9606.ENSP00000255764,9606.ENSP00000256257,9606.ENSP00000257749,9606.ENSP00000259808,9606.ENSP00000260187,…	PSMC4,KEAP1,SIRT1,JOSD1,NFKBIA,PSMD10,PSMD7,KLHL18,PCGF1,FBXO30,RNF103,RNF11,FBXL12,USPL1,MED10,RNF122,BACH2,RIPK1,USP2,DCUN1D5,PSMD11,TRIM37,WSB1,UFD1L,BIRC3,MUL1,ASB1,PSMD3,UBE2B,WDR61,ARRDC4,COPS3,RNF7,ASB6,USP15,FBXW7,USP12,TRIM36,TRIM11,SH3RF1,NSMCE2,MED8,MED27,RNF25,SENP2,UNKL,CDC25A,RNF139,RNFT1,DESI2,RNF181,TADA2B,RCE1,FBXO45,MALT1,DCUN1D3,RCHY1,RNF10,SIAH2,UBE2O,RNF166,YOD1,SPSB1,SOCS3,S…
GO:0045088	regulation of innate immune response	67	361	0.33	8.95e-06	9606.ENSP00000216797,9606.ENSP00000220751,9606.ENSP00000221452,9606.ENSP00000226574,9606.ENSP00000229332,9606.ENSP00000244869,9606.ENSP00000245414,9606.ENSP00000246672,9606.ENSP00000248244,9606.ENSP00000251849,9606.ENSP00000256458,9606.ENSP00000257604,9606.ENSP00000259808,9606.ENSP00000262039,9606.ENSP00000262510,9606.ENSP00000263202,9606.ENSP00000263464,9606.ENSP00000264198,9606.ENSP00000265983,…	NFKBIA,RIPK2,RELB,NFKB1,CLEC4A,EREG,IRF1,NR1D1,TICAM1,RAF1,IRAK2,TRAFD1,RIPK1,PIK3C3,NLRC5,UFD1L,BIRC3,MUL1,HPX,PPARG,IFNGR2,F2RL1,HSP90B1,CRK,IL12A,PRKCE,MALT1,SOCS3,NPLOC4,POLR3C,CAV1,RIOK3,PSPC1,ANKRD17,PELI1,GPATCH3,DUSP10,IFNGR1,CHUK,BCL10,PTPN1,PTAFR,HSPA1B,DDX58,TRIM5,SERPINB9,GPS2,RSAD2,AP1G1,POLR3D,POLR3G,RELA,TLR6,CYLD,PVR,MICA,MUC20,MUC4,TRAF6,UBC,TRAF3,BIRC2,RPS6KA5,ITCH,TNFAIP3,IKBKG…
GO:0010941	regulation of cell death	210	1638	0.17	9.48e-06	9606.ENSP00000013125,9606.ENSP00000064780,9606.ENSP00000179259,9606.ENSP00000198767,9606.ENSP00000202556,9606.ENSP00000212015,9606.ENSP00000215631,9606.ENSP00000216037,9606.ENSP00000216117,9606.ENSP00000216373,9606.ENSP00000216489,9606.ENSP00000216797,9606.ENSP00000217402,9606.ENSP00000217958,9606.ENSP00000220751,9606.ENSP00000223095,9606.ENSP00000224140,9606.ENSP00000225174,9606.ENSP00000226574,…	MAP4K5,RELT,C12orf5,RRN3,PPP1R13B,SIRT1,GADD45B,XBP1,HMOX1,SOS2,ALKBH1,NFKBIA,CHMP4B,PSMD10,RIPK2,SERPINE1,SETX,PPIF,NFKB1,GCLC,BNIP1,DUSP1,SNAI1,PLAGL2,SDF2L1,EGLN3,RAF1,GADD45G,GDF15,JUND,BTG1,EIF2S1,RIPK1,IER3,THBS1,CCND2,TRAF4,ACIN1,C19orf10,MAP3K8,IL1A,BIRC3,ACVR1,MAP4K3,MUL1,RAPGEF2,ICAM1,PPARGC1A,GOLPH3,LEF1,UBE2B,NPC1,SIK1,RHOB,PLK2,TNFRSF10B,SLC25A4,FBXW7,SH3RF1,FLCN,PPARG,BRAF,REL,MITF,…
GO:0019220	regulation of phosphate metabolic process	212	1657	0.16	9.48e-06	9606.ENSP00000013125,9606.ENSP00000014914,9606.ENSP00000179259,9606.ENSP00000200453,9606.ENSP00000209728,9606.ENSP00000212015,9606.ENSP00000215631,9606.ENSP00000216037,9606.ENSP00000217958,9606.ENSP00000220325,9606.ENSP00000220751,9606.ENSP00000225174,9606.ENSP00000228515,9606.ENSP00000230361,9606.ENSP00000230990,9606.ENSP00000235382,9606.ENSP00000239223,9606.ENSP00000244230,9606.ENSP00000244869,…	MAP4K5,GPRC5A,C12orf5,PPP1R15A,CDC6,SIRT1,GADD45B,XBP1,PSMD10,EHD4,RIPK2,PPIF,CSRNP2,GUCA1B,HBEGF,RGS2,DUSP1,MPHOSPH10,EREG,LIF,CHRNA10,RAF1,GADD45G,GDF15,CEP85,SESN2,PPIL4,ZCCHC9,ELP3,IRAK2,RIPK1,SDCBP,THBS1,CCND2,SEMA7A,MMD,TRAF4,NLRC5,PRDX1,ELL,C19orf10,MAP3K8,ACVR1,MAP4K3,CCNT2,MUL1,ALS2,RAPGEF2,DNAJC27,ICAM1,PPARGC1A,MAP3K13,UBE2B,MAPKAP1,GTF2H1,HPX,AKAP8,TNFRSF10B,CDKN2B,NRBF2,FBXW7,PTPRR,S…
GO:0032270	positive regulation of cellular protein metabolic process	195	1496	0.17	9.72e-06	9606.ENSP00000013125,9606.ENSP00000157812,9606.ENSP00000171111,9606.ENSP00000200453,9606.ENSP00000209728,9606.ENSP00000212015,9606.ENSP00000215631,9606.ENSP00000216037,9606.ENSP00000216797,9606.ENSP00000217958,9606.ENSP00000220325,9606.ENSP00000220751,9606.ENSP00000221566,9606.ENSP00000229416,9606.ENSP00000230990,9606.ENSP00000244869,9606.ENSP00000248244,9606.ENSP00000249075,9606.ENSP00000250457,…	MAP4K5,PSMC4,KEAP1,PPP1R15A,CDC6,SIRT1,GADD45B,XBP1,NFKBIA,PSMD10,EHD4,RIPK2,SGTA,GCLC,HBEGF,EREG,TICAM1,LIF,EGLN3,RAF1,GADD45G,GDF15,IRAK2,AKIRIN2,RIPK1,SDCBP,DCUN1D5,THBS1,CCND2,SEMA7A,MMD,TRAF4,C19orf10,MAP3K8,BIRC3,ACVR1,MAP4K3,CCNT2,MUL1,ALS2,RAPGEF2,DNAJC27,ICAM1,PPARGC1A,MAP3K13,ARRDC3,MAPKAP1,HPX,JDP2,WDR61,ARRDC4,AKAP8,PLK2,TNFRSF10B,FBXW7,NIPBL,SH3RF1,FLCN,NSMCE2,PPARG,PRKAG2,BRAF,FGF19…
GO:0031327	negative regulation of cellular biosynthetic process	193	1479	0.17	1.05e-05	9606.ENSP00000157600,9606.ENSP00000179259,9606.ENSP00000209728,9606.ENSP00000212015,9606.ENSP00000216037,9606.ENSP00000217958,9606.ENSP00000218516,9606.ENSP00000221452,9606.ENSP00000222329,9606.ENSP00000225688,9606.ENSP00000226574,9606.ENSP00000228606,9606.ENSP00000229416,9606.ENSP00000230321,9606.ENSP00000230990,9606.ENSP00000234198,9606.ENSP00000235382,9606.ENSP00000239223,9606.ENSP00000242728,…	LMCD1,C12orf5,CDC6,SIRT1,XBP1,PSMD10,GLA,RELB,ERF,RASD1,NFKB1,CYP27B1,GCLC,MDFI,HBEGF,DLX2,RGS2,DUSP1,BHLHE41,ORMDL2,SNAI1,EREG,IRF1,INSIG2,FOSB,NR1D1,DLL4,FXR2,EAPP,JUND,SESN2,THAP1,DNAJB1,RRP8,H3F3B,EIF2S1,MBD2,BHLHE40,BACH2,AKIRIN2,USP2,TRIM37,EPC1,RAPGEF2,MXD1,ASB1,PPARGC1A,LEF1,UBE2B,CREM,BTAF1,JDP2,SIK1,FBXW7,NIPBL,TRIM11,FLCN,PPARG,FGF19,ZNF281,REL,MITF,NFIL3,TSC1,RUNX1,LRP8,RNF139,CEBPB,P…
GO:1901564	organonitrogen compound metabolic process	564	5281	0.09	1.09e-05	9606.ENSP00000013125,9606.ENSP00000035307,9606.ENSP00000053468,9606.ENSP00000157600,9606.ENSP00000157812,9606.ENSP00000158771,9606.ENSP00000161006,9606.ENSP00000166139,9606.ENSP00000171111,9606.ENSP00000185150,9606.ENSP00000200453,9606.ENSP00000212015,9606.ENSP00000215904,9606.ENSP00000216037,9606.ENSP00000216039,9606.ENSP00000216117,9606.ENSP00000216797,9606.ENSP00000217402,9606.ENSP00000217958,…	MAP4K5,CHPF2,MRPS10,LMCD1,PSMC4,DERL2,PRSS22,FSTL3,KEAP1,ERLEC1,PPP1R15A,SIRT1,PDXP,XBP1,JOSD1,HMOX1,NFKBIA,CHMP4B,PSMD10,GLA,PSMD7,RIPK2,GSR,SGTA,NAMPT,FKBP14,CYP3A5,SETX,PPIF,NFKB1,PDHX,PRDM4,FGFR1OP2,GCLC,HARS2,HBEGF,KLHL18,PCGF1,ODC1,PRDM2,SLC19A2,TBPL1,FBXO30,RNF103,ABCG2,DUSP1,ALG5,RNF11,ORMDL2,EREG,NR1D1,WNK4,SDF2,FBXL12,SDF2L1,LIF,DNAJB9,EGLN3,MKNK2,CDADC1,DHX29,RAF1,NUMBL,PPIL4,AOC2,PRKA…
GO:0009890	negative regulation of biosynthetic process	195	1501	0.17	1.17e-05	9606.ENSP00000157600,9606.ENSP00000179259,9606.ENSP00000209728,9606.ENSP00000212015,9606.ENSP00000216037,9606.ENSP00000217958,9606.ENSP00000218516,9606.ENSP00000221452,9606.ENSP00000222329,9606.ENSP00000225688,9606.ENSP00000226574,9606.ENSP00000228606,9606.ENSP00000229416,9606.ENSP00000230321,9606.ENSP00000230990,9606.ENSP00000234198,9606.ENSP00000235382,9606.ENSP00000239223,9606.ENSP00000242728,…	LMCD1,C12orf5,CDC6,SIRT1,XBP1,PSMD10,GLA,RELB,ERF,RASD1,NFKB1,CYP27B1,GCLC,MDFI,HBEGF,DLX2,RGS2,DUSP1,BHLHE41,ORMDL2,SNAI1,EREG,IRF1,INSIG2,FOSB,NR1D1,DLL4,FXR2,EAPP,JUND,SESN2,THAP1,DNAJB1,RRP8,H3F3B,EIF2S1,MBD2,BHLHE40,BACH2,AKIRIN2,USP2,TRIM37,EPC1,RAPGEF2,MXD1,ASB1,PPARGC1A,LEF1,UBE2B,CREM,BTAF1,JDP2,SIK1,FBXW7,NIPBL,TRIM11,FLCN,PPARG,FGF19,ZNF281,REL,MITF,NFIL3,TSC1,RUNX1,LRP8,RNF139,CEBPB,P…
GO:0042981	regulation of apoptotic process	195	1501	0.17	1.17e-05	9606.ENSP00000013125,9606.ENSP00000064780,9606.ENSP00000179259,9606.ENSP00000198767,9606.ENSP00000202556,9606.ENSP00000212015,9606.ENSP00000215631,9606.ENSP00000216037,9606.ENSP00000216117,9606.ENSP00000216373,9606.ENSP00000216489,9606.ENSP00000216797,9606.ENSP00000217958,9606.ENSP00000220751,9606.ENSP00000223095,9606.ENSP00000224140,9606.ENSP00000225174,9606.ENSP00000226574,9606.ENSP00000229416,…	MAP4K5,RELT,C12orf5,RRN3,PPP1R13B,SIRT1,GADD45B,XBP1,HMOX1,SOS2,ALKBH1,NFKBIA,PSMD10,RIPK2,SERPINE1,SETX,PPIF,NFKB1,GCLC,BNIP1,DUSP1,SNAI1,PLAGL2,SDF2L1,EGLN3,RAF1,GADD45G,GDF15,BTG1,EIF2S1,RIPK1,IER3,THBS1,CCND2,TRAF4,ACIN1,C19orf10,MAP3K8,IL1A,BIRC3,ACVR1,MAP4K3,MUL1,RAPGEF2,ICAM1,PPARGC1A,GOLPH3,LEF1,UBE2B,SIK1,RHOB,PLK2,TNFRSF10B,FBXW7,SH3RF1,FLCN,PPARG,BRAF,MITF,ANXA5,HSP90B1,ANGPTL4,IL12A,C…
GO:0010033	response to organic substance	328	2815	0.12	1.25e-05	9606.ENSP00000064780,9606.ENSP00000157812,9606.ENSP00000158771,9606.ENSP00000171111,9606.ENSP00000185150,9606.ENSP00000209728,9606.ENSP00000212015,9606.ENSP00000215904,9606.ENSP00000216037,9606.ENSP00000216117,9606.ENSP00000216797,9606.ENSP00000220325,9606.ENSP00000220751,9606.ENSP00000221452,9606.ENSP00000221566,9606.ENSP00000222553,9606.ENSP00000222803,9606.ENSP00000223095,9606.ENSP00000224140,…	RELT,PSMC4,DERL2,KEAP1,ERLEC1,CDC6,SIRT1,PDXP,XBP1,HMOX1,NFKBIA,EHD4,RIPK2,RELB,SGTA,NAMPT,FKBP14,SERPINE1,SETX,NFKB1,IL10RA,CYP27B1,GCLC,RGS2,RNF103,DUSP1,EREG,IRF1,INSIG2,TNFSF9,FOSB,NR1D1,SDF2,TICAM1,SDF2L1,LIF,DNAJB9,DLL4,RAF1,MED17,MICB,GDF15,JUND,NUMBL,SESN2,DNAJB1,BTG1,EIF2S1,MBD2,IRAK2,CMPK2,OASL,TRAFD1,AKIRIN2,RAB11FIP5,TOR1B,RIPK1,THBS1,PREB,MAPK6,FAF2,PIK3C3,WIPI1,C19orf10,MAP3K8,UFD1L…
GO:0042325	regulation of phosphorylation	191	1465	0.17	1.25e-05	9606.ENSP00000013125,9606.ENSP00000014914,9606.ENSP00000179259,9606.ENSP00000209728,9606.ENSP00000212015,9606.ENSP00000215631,9606.ENSP00000216037,9606.ENSP00000217958,9606.ENSP00000220325,9606.ENSP00000220751,9606.ENSP00000225174,9606.ENSP00000230990,9606.ENSP00000235382,9606.ENSP00000239223,9606.ENSP00000244869,9606.ENSP00000249075,9606.ENSP00000250699,9606.ENSP00000251849,9606.ENSP00000252506,…	MAP4K5,GPRC5A,C12orf5,CDC6,SIRT1,GADD45B,XBP1,PSMD10,EHD4,RIPK2,PPIF,HBEGF,RGS2,DUSP1,EREG,LIF,CHRNA10,RAF1,GADD45G,GDF15,CEP85,SESN2,PPIL4,ELP3,IRAK2,RIPK1,SDCBP,THBS1,CCND2,SEMA7A,MMD,TRAF4,NLRC5,PRDX1,C19orf10,MAP3K8,ACVR1,MAP4K3,CCNT2,MUL1,ALS2,RAPGEF2,DNAJC27,ICAM1,PPARGC1A,MAP3K13,UBE2B,MAPKAP1,GTF2H1,HPX,AKAP8,TNFRSF10B,CDKN2B,NRBF2,FBXW7,PTPRR,SH3RF1,FLCN,PRKAG2,BRAF,DUSP2,FGF19,TGFA,CCNL…
GO:0043067	regulation of programmed cell death	196	1516	0.17	1.42e-05	9606.ENSP00000013125,9606.ENSP00000064780,9606.ENSP00000179259,9606.ENSP00000198767,9606.ENSP00000202556,9606.ENSP00000212015,9606.ENSP00000215631,9606.ENSP00000216037,9606.ENSP00000216117,9606.ENSP00000216373,9606.ENSP00000216489,9606.ENSP00000216797,9606.ENSP00000217958,9606.ENSP00000220751,9606.ENSP00000223095,9606.ENSP00000224140,9606.ENSP00000225174,9606.ENSP00000226574,9606.ENSP00000229416,…	MAP4K5,RELT,C12orf5,RRN3,PPP1R13B,SIRT1,GADD45B,XBP1,HMOX1,SOS2,ALKBH1,NFKBIA,PSMD10,RIPK2,SERPINE1,SETX,PPIF,NFKB1,GCLC,BNIP1,DUSP1,SNAI1,PLAGL2,SDF2L1,EGLN3,RAF1,GADD45G,GDF15,BTG1,EIF2S1,RIPK1,IER3,THBS1,CCND2,TRAF4,ACIN1,C19orf10,MAP3K8,IL1A,BIRC3,ACVR1,MAP4K3,MUL1,RAPGEF2,ICAM1,PPARGC1A,GOLPH3,LEF1,UBE2B,SIK1,RHOB,PLK2,TNFRSF10B,SLC25A4,FBXW7,SH3RF1,FLCN,PPARG,BRAF,MITF,ANXA5,HSP90B1,ANGPTL4…
GO:1902531	regulation of intracellular signal transduction	221	1764	0.16	1.89e-05	9606.ENSP00000013125,9606.ENSP00000033079,9606.ENSP00000157600,9606.ENSP00000198767,9606.ENSP00000202556,9606.ENSP00000212015,9606.ENSP00000215631,9606.ENSP00000216037,9606.ENSP00000216373,9606.ENSP00000216797,9606.ENSP00000217958,9606.ENSP00000220507,9606.ENSP00000220751,9606.ENSP00000225174,9606.ENSP00000230990,9606.ENSP00000235382,9606.ENSP00000239223,9606.ENSP00000244050,9606.ENSP00000244869,…	MAP4K5,FAM13B,LMCD1,RRN3,PPP1R13B,SIRT1,GADD45B,XBP1,SOS2,NFKBIA,PSMD10,RHOV,RIPK2,PPIF,HBEGF,RGS2,DUSP1,SNAI1,EREG,PLAGL2,TICAM1,LIF,CHRNA10,RAF1,GADD45G,GDF15,SESN2,IRAK2,RINT1,RIPK1,IER3,SDCBP,THBS1,ARHGAP29,SEMA7A,TRAF4,PRDX1,C19orf10,MAP3K8,UFD1L,BIRC3,MAP4K3,MUL1,ALS2,RAPGEF2,DNAJC27,ICAM1,MAP3K13,GOLPH3,ARRDC3,UBE2B,MAPKAP1,HPX,RHOF,TAF4B,RHOB,TNFRSF10B,FBXW7,PTPRR,SH3RF1,FLCN,BRAF,DUSP2,A…
GO:1903573	negative regulation of response to endoplasmic reticulum stress	19	44	0.69	2.1e-05	9606.ENSP00000158771,9606.ENSP00000185150,9606.ENSP00000200453,9606.ENSP00000216037,9606.ENSP00000221566,9606.ENSP00000249356,9606.ENSP00000315130,9606.ENSP00000324173,9606.ENSP00000326813,9606.ENSP00000342136,9606.ENSP00000356156,9606.ENSP00000360683,9606.ENSP00000366395,9606.ENSP00000381282,9606.ENSP00000383044,9606.ENSP00000409555,9606.ENSP00000417273,9606.ENSP00000451261,9606.ENSP00000473631	DERL2,ERLEC1,PPP1R15A,XBP1,SGTA,DNAJB9,CLU,HSPA5,YOD1,CREB3,PPP1R15B,PTPN1,SYVN1,VIMP,USP25,HERPUD1,NCK1,UBE2J1,DNAJC3
GO:0009968	negative regulation of signal transduction	157	1160	0.19	2.27e-05	9606.ENSP00000014914,9606.ENSP00000166139,9606.ENSP00000198767,9606.ENSP00000200453,9606.ENSP00000212015,9606.ENSP00000216037,9606.ENSP00000216117,9606.ENSP00000216797,9606.ENSP00000217958,9606.ENSP00000223095,9606.ENSP00000225174,9606.ENSP00000229416,9606.ENSP00000230321,9606.ENSP00000234198,9606.ENSP00000235382,9606.ENSP00000239223,9606.ENSP00000239882,9606.ENSP00000244050,9606.ENSP00000246672,…	GPRC5A,FSTL3,RRN3,PPP1R15A,SIRT1,XBP1,HMOX1,NFKBIA,PSMD10,SERPINE1,PPIF,GCLC,MDFI,DLX2,RGS2,DUSP1,ELF1,SNAI1,NR1D1,TICAM1,LIF,DNAJB9,DLL4,CHRNA10,RAF1,GDF15,SESN2,RIPK1,THBS1,NLRC5,UFD1L,IL1A,ACVR1,MUL1,ICAM1,PPARGC1A,ARRDC3,LEF1,UBE2B,FSTL4,MAPKAP1,TNFRSF10B,FBXW7,PTPRR,SH3RF1,FLCN,PPARG,BRAF,DUSP2,SENP2,F2RL1,TSC1,TMEM88,CXCL8,DDIT4,ADAM17,TRIB1,CFLAR,DAB2,PER1,CLU,PIBF1,HSPH1,CALR,SIAH2,HSPA5,…
GO:0048523	negative regulation of cellular process	482	4454	0.09	3.4e-05	9606.ENSP00000014914,9606.ENSP00000157600,9606.ENSP00000158771,9606.ENSP00000166139,9606.ENSP00000179259,9606.ENSP00000185150,9606.ENSP00000198767,9606.ENSP00000200453,9606.ENSP00000202556,9606.ENSP00000209728,9606.ENSP00000212015,9606.ENSP00000215631,9606.ENSP00000216037,9606.ENSP00000216117,9606.ENSP00000216420,9606.ENSP00000216489,9606.ENSP00000216797,9606.ENSP00000217402,9606.ENSP00000217958,…	GPRC5A,LMCD1,DERL2,FSTL3,C12orf5,ERLEC1,RRN3,PPP1R15A,PPP1R13B,CDC6,SIRT1,GADD45B,XBP1,HMOX1,CGRRF1,ALKBH1,NFKBIA,CHMP4B,PSMD10,GLA,RIPK2,RELB,SGTA,ERF,SERPINE1,SETX,PPIF,RASD1,NFKB1,CSRNP2,CYP27B1,GCLC,MDFI,HBEGF,BNIP1,DLX2,MSH6,RGS2,ATAD2B,DUSP1,ELF1,BHLHE41,ORMDL2,SNAI1,MPHOSPH10,EREG,IRF1,INSIG2,FOSB,NR1D1,TICAM1,LIF,DNAJB9,DLL4,FXR2,EAPP,CHRNA10,RAF1,GDF15,JUND,CEP85,SESN2,ZCCHC9,PRKAB2,THAP…
GO:0044257	cellular protein catabolic process	89	562	0.26	3.9e-05	9606.ENSP00000157812,9606.ENSP00000158771,9606.ENSP00000171111,9606.ENSP00000185150,9606.ENSP00000212015,9606.ENSP00000216037,9606.ENSP00000217402,9606.ENSP00000219313,9606.ENSP00000221566,9606.ENSP00000237455,9606.ENSP00000242719,9606.ENSP00000246672,9606.ENSP00000247020,9606.ENSP00000247977,9606.ENSP00000248958,9606.ENSP00000249356,9606.ENSP00000256257,9606.ENSP00000259808,9606.ENSP00000260187,…	PSMC4,DERL2,KEAP1,ERLEC1,SIRT1,XBP1,CHMP4B,PSMD7,SGTA,RNF103,RNF11,NR1D1,SDF2,FBXL12,SDF2L1,DNAJB9,RNF122,RIPK1,USP2,PSMD11,FAF2,UFD1L,PSMD3,UBE2B,PTPN23,GET4,COPS3,RNF7,USP15,FBXW7,USP12,TMEM199,UBAP1,HSP90B1,KCTD5,RNF139,RNF181,FBXO45,KCTD2,KLHL11,TOLLIP,VPS37A,RCHY1,SIAH2,HSPA5,PMAIP1,YOD1,NPLOC4,RAB12,KLHL25,DNAJB2,KCTD21,RNF41,KCTD6,MYLIP,TRIM38,VCP,ZRANB1,TOPORS,SMURF1,BTRC,TP53INP2,UBR4,SY…
GO:0030163	protein catabolic process	95	615	0.25	4.3e-05	9606.ENSP00000157812,9606.ENSP00000158771,9606.ENSP00000171111,9606.ENSP00000185150,9606.ENSP00000212015,9606.ENSP00000216037,9606.ENSP00000217402,9606.ENSP00000219313,9606.ENSP00000221566,9606.ENSP00000237455,9606.ENSP00000242719,9606.ENSP00000246672,9606.ENSP00000247020,9606.ENSP00000247977,9606.ENSP00000248958,9606.ENSP00000249356,9606.ENSP00000256257,9606.ENSP00000259808,9606.ENSP00000260187,…	PSMC4,DERL2,KEAP1,ERLEC1,SIRT1,XBP1,CHMP4B,PSMD7,SGTA,RNF103,RNF11,NR1D1,SDF2,FBXL12,SDF2L1,DNAJB9,RNF122,RIPK1,USP2,PSMD11,FAF2,UFD1L,PSMD3,UBE2B,PTPN23,GET4,COPS3,RNF7,USP15,FBXW7,USP12,TMEM199,UBAP1,HSP90B1,KCTD5,RNF139,RNF181,FBXO45,KCTD2,KLHL11,TOLLIP,CLU,VPS37A,RCHY1,SIAH2,HSPA5,PMAIP1,YOD1,CLN8,NPLOC4,RAB12,HSP90AA1,KLHL25,DNAJB2,KCTD21,RNF41,KCTD6,MYLIP,TRIM38,VCP,ZRANB1,TOPORS,SMURF1,BTR…
GO:0051603	proteolysis involved in cellular protein catabolic process	85	532	0.26	4.99e-05	9606.ENSP00000157812,9606.ENSP00000158771,9606.ENSP00000171111,9606.ENSP00000185150,9606.ENSP00000212015,9606.ENSP00000216037,9606.ENSP00000217402,9606.ENSP00000219313,9606.ENSP00000221566,9606.ENSP00000237455,9606.ENSP00000242719,9606.ENSP00000246672,9606.ENSP00000247020,9606.ENSP00000247977,9606.ENSP00000248958,9606.ENSP00000249356,9606.ENSP00000256257,9606.ENSP00000260187,9606.ENSP00000261712,…	PSMC4,DERL2,KEAP1,ERLEC1,SIRT1,XBP1,CHMP4B,PSMD7,SGTA,RNF103,RNF11,NR1D1,SDF2,FBXL12,SDF2L1,DNAJB9,RNF122,USP2,PSMD11,FAF2,UFD1L,PSMD3,UBE2B,PTPN23,GET4,COPS3,RNF7,USP15,FBXW7,USP12,UBAP1,HSP90B1,KCTD5,RNF139,RNF181,FBXO45,KCTD2,KLHL11,TOLLIP,VPS37A,RCHY1,SIAH2,HSPA5,PMAIP1,YOD1,NPLOC4,KLHL25,DNAJB2,KCTD21,RNF41,KCTD6,MYLIP,TRIM38,VCP,ZRANB1,TOPORS,SMURF1,BTRC,TP53INP2,UBR4,SYVN1,ISG15,SQSTM1,USP…
GO:0051090	regulation of DNA-binding transcription factor activity	69	403	0.29	6.6e-05	9606.ENSP00000171111,9606.ENSP00000212015,9606.ENSP00000216117,9606.ENSP00000216797,9606.ENSP00000217958,9606.ENSP00000220751,9606.ENSP00000226574,9606.ENSP00000230321,9606.ENSP00000248244,9606.ENSP00000256458,9606.ENSP00000256495,9606.ENSP00000259808,9606.ENSP00000262294,9606.ENSP00000262510,9606.ENSP00000264832,9606.ENSP00000264867,9606.ENSP00000265026,9606.ENSP00000270162,9606.ENSP00000275015,…	KEAP1,SIRT1,HMOX1,NFKBIA,PSMD10,RIPK2,NFKB1,MDFI,TICAM1,IRAK2,BHLHE40,RIPK1,TRIM37,NLRC5,ICAM1,PPARGC1A,MAP3K13,SIK1,NFKBIE,PPRC1,PPARG,RNF25,TERF2IP,RHEBL1,LRP8,ZNF431,FOSL1,TRIB1,CFLAR,SPHK1,CLU,MALT1,RIPK4,SMAD3,CREB3,RNF41,TRIM38,PELI1,PROX1,SGK1,DDR2,NFKB2,BTRC,CHUK,BCL10,JUN,PPAP2B,ZC3H12A,PIM1,KLF4,HSPA1B,RGCC,EDN1,DDX58,TRIM5,SGK3,KDM5A,RELA,TLR6,CYLD,BRMS1,TRAF6,UBC,DDIT3,TRAF3,RPS6KA5,I…
GO:0006984	ER-nucleus signaling pathway	16	34	0.73	6.98e-05	9606.ENSP00000216037,9606.ENSP00000245787,9606.ENSP00000256383,9606.ENSP00000299767,9606.ENSP00000306512,9606.ENSP00000307235,9606.ENSP00000320866,9606.ENSP00000324173,9606.ENSP00000344352,9606.ENSP00000344741,9606.ENSP00000356156,9606.ENSP00000380252,9606.ENSP00000381282,9606.ENSP00000409555,9606.ENSP00000440045,9606.ENSP00000448665	XBP1,INSIG2,EIF2S1,HSP90B1,CXCL8,EIF2AK3,CALR,HSPA5,ATF3,INSIG1,PPP1R15B,NFE2L2,VIMP,HERPUD1,ATP2A2,DDIT3
GO:0000122	negative regulation of transcription by RNA polymerase II	116	809	0.21	7.02e-05	9606.ENSP00000157600,9606.ENSP00000212015,9606.ENSP00000216037,9606.ENSP00000217958,9606.ENSP00000221452,9606.ENSP00000222329,9606.ENSP00000226574,9606.ENSP00000230321,9606.ENSP00000234198,9606.ENSP00000242728,9606.ENSP00000244050,9606.ENSP00000245919,9606.ENSP00000246672,9606.ENSP00000249749,9606.ENSP00000250454,9606.ENSP00000252818,9606.ENSP00000254250,9606.ENSP00000254322,9606.ENSP00000256429,…	LMCD1,SIRT1,XBP1,PSMD10,RELB,ERF,NFKB1,MDFI,DLX2,BHLHE41,SNAI1,FOSB,NR1D1,DLL4,EAPP,JUND,THAP1,DNAJB1,MBD2,BHLHE40,BACH2,AKIRIN2,USP2,TRIM37,EPC1,MXD1,LEF1,CREM,JDP2,NIPBL,FLCN,PPARG,ZNF281,REL,MITF,NFIL3,RUNX1,LRP8,CEBPB,ZBTB5,ZNF608,ZNF239,MEPCE,ZNF431,NR1D2,PPARD,PER1,ZHX2,CALR,ZNF354B,SMAD3,ZNF354A,ZNF202,OVOL1,GZF1,CAV1,HIST1H1C,ZNF189,MCPH1,ZNF136,ATF3,NR4A2,MAFK,ZNF140,NRARP,ARID5A,ZEB1,CT…
GO:0001817	regulation of cytokine production	94	615	0.24	7.07e-05	9606.ENSP00000216037,9606.ENSP00000216117,9606.ENSP00000220751,9606.ENSP00000221452,9606.ENSP00000223095,9606.ENSP00000226574,9606.ENSP00000229332,9606.ENSP00000232496,9606.ENSP00000239882,9606.ENSP00000244869,9606.ENSP00000245414,9606.ENSP00000248244,9606.ENSP00000257787,9606.ENSP00000259808,9606.ENSP00000260356,9606.ENSP00000261918,9606.ENSP00000262510,9606.ENSP00000263202,9606.ENSP00000263339,…	XBP1,HMOX1,RIPK2,RELB,SERPINE1,NFKB1,CLEC4A,TUSC2,ELF1,EREG,IRF1,TICAM1,AKIRIN2,RIPK1,THBS1,SEMA7A,NLRC5,UFD1L,IL1A,BIRC3,MUL1,ASB1,LEF1,AKAP8,REL,F2RL1,RUNX1,IL12A,ADORA2B,CEBPB,EIF2AK3,ADAM17,HEG1,SPHK1,PER1,CLU,PIBF1,MALT1,KARS,NPLOC4,PDE4B,SMAD3,POLR3C,RIOK3,MAP2K3,BTN2A2,TRIM38,ANKRD17,PELI1,GPATCH3,F11R,IL6R,NFKB2,CHUK,BCL10,ZC3H12A,PTAFR,KLF4,HSPA1B,ERRFI1,CD83,RGCC,ISG15,DDX58,CD274,GPNMB…
GO:0048585	negative regulation of response to stimulus	188	1483	0.16	7.54e-05	9606.ENSP00000014914,9606.ENSP00000158771,9606.ENSP00000166139,9606.ENSP00000185150,9606.ENSP00000198767,9606.ENSP00000200453,9606.ENSP00000212015,9606.ENSP00000216037,9606.ENSP00000216117,9606.ENSP00000216797,9606.ENSP00000217958,9606.ENSP00000221566,9606.ENSP00000223095,9606.ENSP00000225174,9606.ENSP00000226574,9606.ENSP00000229416,9606.ENSP00000230321,9606.ENSP00000234198,9606.ENSP00000235382,…	GPRC5A,DERL2,FSTL3,ERLEC1,RRN3,PPP1R15A,SIRT1,XBP1,HMOX1,NFKBIA,PSMD10,SGTA,SERPINE1,PPIF,NFKB1,GCLC,MDFI,DLX2,RGS2,DUSP1,ELF1,SNAI1,NR1D1,TICAM1,LIF,DNAJB9,DLL4,CHRNA10,RAF1,MICB,GDF15,SESN2,TRAFD1,RIPK1,THBS1,NLRC5,UFD1L,IL1A,ACVR1,MUL1,ICAM1,PPARGC1A,ARRDC3,LEF1,UBE2B,FSTL4,MAPKAP1,PLK2,TNFRSF10B,FBXW7,PTPRR,SH3RF1,FLCN,PPARG,BRAF,DUSP2,SENP2,NDUFAF2,F2RL1,TSC1,CRK,TMEM88,CXCL8,DDIT4,ADAM17,PP…
GO:0009894	regulation of catabolic process	119	840	0.21	8.4e-05	9606.ENSP00000157812,9606.ENSP00000158771,9606.ENSP00000171111,9606.ENSP00000179259,9606.ENSP00000185150,9606.ENSP00000212015,9606.ENSP00000216037,9606.ENSP00000216117,9606.ENSP00000217402,9606.ENSP00000217958,9606.ENSP00000220751,9606.ENSP00000221566,9606.ENSP00000229416,9606.ENSP00000234111,9606.ENSP00000248244,9606.ENSP00000253063,9606.ENSP00000258770,9606.ENSP00000260130,9606.ENSP00000262384,…	PSMC4,DERL2,KEAP1,C12orf5,ERLEC1,SIRT1,XBP1,HMOX1,CHMP4B,PSMD10,RIPK2,SGTA,GCLC,ODC1,TICAM1,SESN2,TBRG4,SDCBP,N4BP1,MUL1,PIKFYVE,PSMD3,PPARGC1A,C18orf8,NPC1,PLK2,CCRN4L,FBXW7,FLCN,NSMCE2,PRKAG2,STX5,KIAA0226,TSC1,RNF139,SF3B3,PRKCE,DDIT4,PDE12,TRIB1,DAB2,ZFAND2A,CLU,RCHY1,RNF166,YOD1,RAB12,DHX34,SMAD3,HSP90AA1,DNAJB2,ATG101,CAV1,RNF41,NRD1,UVRAG,MYLIP,VCP,NUP214,SUPV3L1,MTCL1,DDA1,SMURF1,LRIG2,EX…
GO:0010629	negative regulation of gene expression	207	1670	0.15	8.4e-05	9606.ENSP00000157600,9606.ENSP00000212015,9606.ENSP00000216037,9606.ENSP00000217958,9606.ENSP00000221452,9606.ENSP00000222329,9606.ENSP00000223095,9606.ENSP00000225688,9606.ENSP00000226574,9606.ENSP00000229416,9606.ENSP00000230321,9606.ENSP00000234198,9606.ENSP00000235382,9606.ENSP00000242728,9606.ENSP00000244050,9606.ENSP00000244869,9606.ENSP00000245414,9606.ENSP00000245919,9606.ENSP00000246672,…	LMCD1,SIRT1,XBP1,PSMD10,RELB,ERF,SERPINE1,RASD1,NFKB1,GCLC,MDFI,DLX2,RGS2,BHLHE41,SNAI1,EREG,IRF1,FOSB,NR1D1,DLL4,FXR2,EAPP,JUND,SESN2,THAP1,DNAJB1,RRP8,H3F3B,EIF2S1,MBD2,BHLHE40,BACH2,AKIRIN2,USP2,THBS1,TRIM37,ACIN1,EPC1,BIRC3,MXD1,LEF1,UBE2B,CREM,BTAF1,JDP2,WDR61,PELO,CCRN4L,NIPBL,TRIM11,FLCN,PPARG,FGF19,ZNF281,REL,MITF,SNIP1,NFIL3,TSC1,RUNX1,LRP8,RNF139,CEBPB,PPM1D,EIF2AK3,ZBTB5,ZNF608,ZNF239,…
GO:0043549	regulation of kinase activity	120	849	0.21	8.4e-05	9606.ENSP00000013125,9606.ENSP00000014914,9606.ENSP00000179259,9606.ENSP00000209728,9606.ENSP00000212015,9606.ENSP00000215631,9606.ENSP00000217958,9606.ENSP00000220751,9606.ENSP00000235382,9606.ENSP00000239223,9606.ENSP00000244869,9606.ENSP00000251849,9606.ENSP00000252506,9606.ENSP00000252809,9606.ENSP00000252992,9606.ENSP00000253063,9606.ENSP00000256398,9606.ENSP00000256458,9606.ENSP00000259808,…	MAP4K5,GPRC5A,C12orf5,CDC6,SIRT1,GADD45B,PSMD10,RIPK2,RGS2,DUSP1,EREG,RAF1,GADD45G,GDF15,CEP85,SESN2,ELP3,IRAK2,RIPK1,THBS1,CCND2,MMD,TRAF4,NLRC5,MAP3K8,MAP4K3,CCNT2,MUL1,ALS2,RAPGEF2,MAP3K13,MAPKAP1,GTF2H1,TNFRSF10B,CDKN2B,NRBF2,FBXW7,PRKAG2,BRAF,DUSP2,TGFA,CCNL1,KIAA0226,TSC1,CRK,LRP8,CDC25A,ADORA2B,IBTK,YWHAG,ADAM17,ZNF622,TRIB1,CLU,PIBF1,HSPH1,CHORDC1,MALT1,KARS,CSF1,SOCS3,HSP90AA1,SPDYA,CAV1…
GO:0031329	regulation of cellular catabolic process	108	743	0.22	9.05e-05	9606.ENSP00000157812,9606.ENSP00000158771,9606.ENSP00000171111,9606.ENSP00000179259,9606.ENSP00000185150,9606.ENSP00000212015,9606.ENSP00000216037,9606.ENSP00000216117,9606.ENSP00000217402,9606.ENSP00000217958,9606.ENSP00000220751,9606.ENSP00000221566,9606.ENSP00000229416,9606.ENSP00000248244,9606.ENSP00000253063,9606.ENSP00000258770,9606.ENSP00000260130,9606.ENSP00000262384,9606.ENSP00000264198,…	PSMC4,DERL2,KEAP1,C12orf5,ERLEC1,SIRT1,XBP1,HMOX1,CHMP4B,PSMD10,RIPK2,SGTA,GCLC,TICAM1,SESN2,TBRG4,SDCBP,N4BP1,MUL1,PIKFYVE,PPARGC1A,C18orf8,NPC1,PLK2,CCRN4L,FBXW7,FLCN,NSMCE2,PRKAG2,KIAA0226,TSC1,RNF139,DDIT4,PDE12,TRIB1,DAB2,ZFAND2A,CLU,RCHY1,RNF166,YOD1,RAB12,DHX34,HSP90AA1,DNAJB2,ATG101,CAV1,RNF41,NRD1,UVRAG,MYLIP,VCP,NUP214,SUPV3L1,MTCL1,DDA1,SMURF1,LRIG2,EXOC8,EFNA1,MCL1,FAM46C,BTRC,PTPN1,L…
GO:0001932	regulation of protein phosphorylation	175	1370	0.16	0.00012	9606.ENSP00000013125,9606.ENSP00000014914,9606.ENSP00000209728,9606.ENSP00000212015,9606.ENSP00000215631,9606.ENSP00000216037,9606.ENSP00000217958,9606.ENSP00000220325,9606.ENSP00000220751,9606.ENSP00000230990,9606.ENSP00000235382,9606.ENSP00000239223,9606.ENSP00000244869,9606.ENSP00000249075,9606.ENSP00000250699,9606.ENSP00000251849,9606.ENSP00000252506,9606.ENSP00000252809,9606.ENSP00000252992,…	MAP4K5,GPRC5A,CDC6,SIRT1,GADD45B,XBP1,PSMD10,EHD4,RIPK2,HBEGF,RGS2,DUSP1,EREG,LIF,CHRNA10,RAF1,GADD45G,GDF15,CEP85,SESN2,PPIL4,ELP3,IRAK2,RIPK1,SDCBP,THBS1,CCND2,SEMA7A,MMD,TRAF4,PRDX1,C19orf10,MAP3K8,ACVR1,MAP4K3,CCNT2,MUL1,ALS2,RAPGEF2,DNAJC27,ICAM1,PPARGC1A,MAP3K13,UBE2B,MAPKAP1,GTF2H1,HPX,AKAP8,TNFRSF10B,CDKN2B,FBXW7,PTPRR,SH3RF1,FLCN,PRKAG2,BRAF,DUSP2,FGF19,TGFA,CCNL1,SENP2,F2RL1,TSC1,TERF2I…
GO:0010498	proteasomal protein catabolic process	53	284	0.33	0.00012	9606.ENSP00000157812,9606.ENSP00000158771,9606.ENSP00000171111,9606.ENSP00000185150,9606.ENSP00000212015,9606.ENSP00000219313,9606.ENSP00000221566,9606.ENSP00000237455,9606.ENSP00000242719,9606.ENSP00000246672,9606.ENSP00000247020,9606.ENSP00000248958,9606.ENSP00000249356,9606.ENSP00000256257,9606.ENSP00000261942,9606.ENSP00000263202,9606.ENSP00000265339,9606.ENSP00000265857,9606.ENSP00000273480,…	PSMC4,DERL2,KEAP1,ERLEC1,SIRT1,PSMD7,SGTA,RNF103,RNF11,NR1D1,SDF2,SDF2L1,DNAJB9,RNF122,FAF2,UFD1L,UBE2B,GET4,RNF7,FBXW7,HSP90B1,KCTD5,RNF139,RNF181,FBXO45,KCTD2,KLHL11,HSPA5,PMAIP1,YOD1,NPLOC4,DNAJB2,RNF41,TRIM38,VCP,TOPORS,SMURF1,BTRC,SYVN1,NFE2L2,HM13,VIMP,NEDD4L,PSME4,ARNTL,HERPUD1,ABTB2,RNF4,UBC,DDIT3,UBE2J1,BIRC2,ITCH
GO:0009966	regulation of signal transduction	341	3033	0.11	0.00013	9606.ENSP00000013125,9606.ENSP00000014914,9606.ENSP00000033079,9606.ENSP00000157600,9606.ENSP00000166139,9606.ENSP00000198767,9606.ENSP00000200453,9606.ENSP00000202556,9606.ENSP00000212015,9606.ENSP00000215631,9606.ENSP00000216037,9606.ENSP00000216117,9606.ENSP00000216373,9606.ENSP00000216489,9606.ENSP00000216797,9606.ENSP00000217958,9606.ENSP00000220507,9606.ENSP00000220751,9606.ENSP00000222553,…	MAP4K5,GPRC5A,FAM13B,LMCD1,FSTL3,RRN3,PPP1R15A,PPP1R13B,SIRT1,GADD45B,XBP1,HMOX1,SOS2,ALKBH1,NFKBIA,PSMD10,RHOV,RIPK2,NAMPT,SERPINE1,PPIF,NFKB1,CYP27B1,GCLC,MDFI,GUCA1B,HBEGF,DLX2,RGS2,DUSP1,ELF1,SNAI1,EREG,IRF1,TNFSF9,PLAGL2,NR1D1,TICAM1,LIF,DNAJB9,DLL4,CHRNA10,RAF1,GADD45G,SAFB2,GDF15,SESN2,MBD2,IRAK2,RINT1,RIPK1,IER3,SDCBP,THBS1,ARHGAP29,SEMA7A,TRAF4,NLRC5,PRDX1,C19orf10,MAP3K8,UFD1L,IL1A,BIRC…
GO:0043900	regulation of multi-organism process	97	653	0.23	0.00013	9606.ENSP00000216797,9606.ENSP00000217402,9606.ENSP00000220751,9606.ENSP00000221452,9606.ENSP00000226574,9606.ENSP00000229332,9606.ENSP00000244869,9606.ENSP00000245414,9606.ENSP00000246672,9606.ENSP00000248244,9606.ENSP00000251849,9606.ENSP00000252229,9606.ENSP00000256458,9606.ENSP00000257570,9606.ENSP00000257604,9606.ENSP00000259808,9606.ENSP00000262039,9606.ENSP00000262510,9606.ENSP00000263202,…	NFKBIA,CHMP4B,RIPK2,RELB,NFKB1,CLEC4A,EREG,IRF1,NR1D1,TICAM1,RAF1,MICB,IRAK2,OASL,TRAFD1,RIPK1,PIK3C3,NLRC5,UFD1L,BIRC3,OSBP,MUL1,LEF1,HPX,VPS37B,TRIM11,PPARG,IFNGR2,ZNF502,F2RL1,HSP90B1,PPIB,CRK,IL12A,PRKCE,CXCL8,ISG20,PDE12,TRIB1,MALT1,CALR,P4HB,IFNLR1,SOCS3,NPLOC4,POLR3C,CAV1,RIOK3,CREB3,PSPC1,TBC1D20,TRIM38,ANKRD17,PELI1,ADARB1,TAF11,GPATCH3,DUSP10,PROX1,IFNGR1,PRDM1,CHUK,BCL10,JUN,PTPN1,ZC3H…
GO:0050790	regulation of catalytic activity	264	2249	0.13	0.00013	9606.ENSP00000013125,9606.ENSP00000014914,9606.ENSP00000033079,9606.ENSP00000179259,9606.ENSP00000200453,9606.ENSP00000209728,9606.ENSP00000212015,9606.ENSP00000215631,9606.ENSP00000217958,9606.ENSP00000218516,9606.ENSP00000220751,9606.ENSP00000223095,9606.ENSP00000225174,9606.ENSP00000226574,9606.ENSP00000228515,9606.ENSP00000228606,9606.ENSP00000230361,9606.ENSP00000234420,9606.ENSP00000235382,…	MAP4K5,GPRC5A,FAM13B,C12orf5,PPP1R15A,CDC6,SIRT1,GADD45B,PSMD10,GLA,RIPK2,SERPINE1,PPIF,NFKB1,CSRNP2,CYP27B1,GUCA1B,MSH6,RGS2,DUSP1,MPHOSPH10,EREG,EGLN3,RAF1,GADD45G,GDF15,CEP85,SESN2,ZCCHC9,DNAJB1,ELP3,IRAK2,AKIRIN2,RIPK1,DCUN1D5,THBS1,ARHGAP29,PREB,CCND2,FAF2,MMD,TMED2,TRAF4,NLRC5,ELL,MAP3K8,ARFGAP3,BIRC3,MAP4K3,CCNT2,MUL1,ALS2,RASGEF1B,RAPGEF2,PSMD3,ICAM1,GRPEL1,MAP3K13,ARRDC3,LEF1,MAPKAP1,GTF…
GO:0071900	regulation of protein serine/threonine kinase activity	78	488	0.26	0.00013	9606.ENSP00000013125,9606.ENSP00000209728,9606.ENSP00000212015,9606.ENSP00000215631,9606.ENSP00000217958,9606.ENSP00000220751,9606.ENSP00000235382,9606.ENSP00000239223,9606.ENSP00000251849,9606.ENSP00000252506,9606.ENSP00000252809,9606.ENSP00000253063,9606.ENSP00000256458,9606.ENSP00000259808,9606.ENSP00000260356,9606.ENSP00000261254,9606.ENSP00000263056,9606.ENSP00000263881,9606.ENSP00000264157,…	MAP4K5,CDC6,SIRT1,GADD45B,PSMD10,RIPK2,RGS2,DUSP1,RAF1,GADD45G,GDF15,SESN2,IRAK2,RIPK1,THBS1,CCND2,MAP3K8,MAP4K3,CCNT2,MUL1,ALS2,RAPGEF2,MAP3K13,GTF2H1,CDKN2B,PRKAG2,BRAF,DUSP2,TGFA,CCNL1,CRK,CDC25A,ADORA2B,YWHAG,ADAM17,TRIB1,CHORDC1,KARS,SPDYA,CAV1,SFN,CCNYL1,MAP2K3,PDGFA,UVRAG,SERTAD1,AKAP13,DUSP10,PROX1,PEA15,DUSP5,AVPI1,GADD45A,PTPN1,PIM1,DKK1,BMP2,RGCC,EDN1,GPS2,LATS2,DUSP8,CDKN1A,TLR6,CDK12…
GO:0002237	response to molecule of bacterial origin	57	317	0.31	0.00014	9606.ENSP00000064780,9606.ENSP00000216037,9606.ENSP00000216797,9606.ENSP00000220751,9606.ENSP00000223095,9606.ENSP00000226574,9606.ENSP00000227752,9606.ENSP00000228606,9606.ENSP00000246672,9606.ENSP00000248244,9606.ENSP00000252818,9606.ENSP00000256458,9606.ENSP00000256722,9606.ENSP00000257787,9606.ENSP00000264832,9606.ENSP00000264867,9606.ENSP00000269701,9606.ENSP00000276431,9606.ENSP00000280614,…	RELT,XBP1,NFKBIA,RIPK2,SERPINE1,NFKB1,IL10RA,CYP27B1,NR1D1,TICAM1,JUND,IRAK2,CMPK2,AKIRIN2,ICAM1,PPARGC1A,AKAP8,TNFRSF10B,CCRN4L,CXCL3,CXCL5,IL12A,CEBPB,PRKCE,CXCL8,ADAM17,TNFRSF10D,PPARD,TRIB1,NFKBIB,MALT1,PDE4B,PELI1,CTR9,DUSP10,NFKB2,CHUK,ABCC2,BCL10,JUN,ANKRD1,ZC3H12A,PTAFR,EDN1,CXCL1,VIMP,IL18BP,RELA,TLR6,GCH1,CXCL2,TRAF6,ADM,ATP2A2,LITAF,TNFRSF9,TNFAIP3
GO:0010558	negative regulation of macromolecule biosynthetic process	180	1425	0.16	0.00014	9606.ENSP00000157600,9606.ENSP00000209728,9606.ENSP00000212015,9606.ENSP00000216037,9606.ENSP00000217958,9606.ENSP00000221452,9606.ENSP00000222329,9606.ENSP00000225688,9606.ENSP00000226574,9606.ENSP00000229416,9606.ENSP00000230321,9606.ENSP00000230990,9606.ENSP00000234198,9606.ENSP00000235382,9606.ENSP00000239223,9606.ENSP00000242728,9606.ENSP00000244050,9606.ENSP00000244869,9606.ENSP00000245414,…	LMCD1,CDC6,SIRT1,XBP1,PSMD10,RELB,ERF,RASD1,NFKB1,GCLC,MDFI,HBEGF,DLX2,RGS2,DUSP1,BHLHE41,SNAI1,EREG,IRF1,FOSB,NR1D1,DLL4,FXR2,EAPP,JUND,SESN2,THAP1,DNAJB1,RRP8,H3F3B,EIF2S1,MBD2,BHLHE40,BACH2,AKIRIN2,USP2,TRIM37,EPC1,MXD1,ASB1,LEF1,UBE2B,CREM,BTAF1,JDP2,FBXW7,NIPBL,TRIM11,FLCN,PPARG,ZNF281,REL,MITF,NFIL3,TSC1,RUNX1,LRP8,RNF139,CEBPB,PPM1D,DONSON,EIF2AK3,ZBTB5,ZNF608,ZNF239,MEPCE,ZNF431,NR1D2,PPA…
GO:0043068	positive regulation of programmed cell death	92	610	0.24	0.00014	9606.ENSP00000179259,9606.ENSP00000202556,9606.ENSP00000212015,9606.ENSP00000215631,9606.ENSP00000216037,9606.ENSP00000216117,9606.ENSP00000216373,9606.ENSP00000220751,9606.ENSP00000225174,9606.ENSP00000239223,9606.ENSP00000246229,9606.ENSP00000250457,9606.ENSP00000252506,9606.ENSP00000256015,9606.ENSP00000256383,9606.ENSP00000259808,9606.ENSP00000260356,9606.ENSP00000262710,9606.ENSP00000264198,…	C12orf5,PPP1R13B,SIRT1,GADD45B,XBP1,HMOX1,SOS2,RIPK2,PPIF,DUSP1,PLAGL2,EGLN3,GADD45G,BTG1,EIF2S1,RIPK1,THBS1,ACIN1,MUL1,RAPGEF2,PPARGC1A,SIK1,RHOB,TNFRSF10B,FBXW7,FLCN,PPARG,IL12A,YWHAG,EIF2AK3,CYCS,ZNF622,FOSL1,CLU,STK17A,DCUN1D3,PMAIP1,TNFRSF12A,SMAD3,CAV1,PLAUR,SFN,ATF3,NET1,VCP,AKAP13,OSGIN1,CTGF,PEA15,MCL1,BCL10,GADD45A,JUN,ANKRD1,ZC3H12A,MTCH1,BAK1,TRIM39,BMP2,RGCC,XDH,NKX3-1,IGFBP3,ITSN1,C…
GO:0045859	regulation of protein kinase activity	112	788	0.21	0.00014	9606.ENSP00000013125,9606.ENSP00000014914,9606.ENSP00000209728,9606.ENSP00000212015,9606.ENSP00000215631,9606.ENSP00000217958,9606.ENSP00000220751,9606.ENSP00000235382,9606.ENSP00000239223,9606.ENSP00000244869,9606.ENSP00000251849,9606.ENSP00000252506,9606.ENSP00000252809,9606.ENSP00000252992,9606.ENSP00000253063,9606.ENSP00000256398,9606.ENSP00000256458,9606.ENSP00000259808,9606.ENSP00000260356,…	MAP4K5,GPRC5A,CDC6,SIRT1,GADD45B,PSMD10,RIPK2,RGS2,DUSP1,EREG,RAF1,GADD45G,GDF15,CEP85,SESN2,ELP3,IRAK2,RIPK1,THBS1,CCND2,MMD,TRAF4,MAP3K8,MAP4K3,CCNT2,MUL1,ALS2,RAPGEF2,MAP3K13,MAPKAP1,GTF2H1,TNFRSF10B,CDKN2B,FBXW7,PRKAG2,BRAF,DUSP2,TGFA,CCNL1,TSC1,CRK,LRP8,CDC25A,ADORA2B,IBTK,YWHAG,ADAM17,TRIB1,CLU,PIBF1,HSPH1,CHORDC1,MALT1,KARS,CSF1,SOCS3,HSP90AA1,SPDYA,CAV1,SFN,CCNYL1,MAP2K3,PDGFA,UVRAG,SERTA…
GO:2000113	negative regulation of cellular macromolecule biosynthetic process	172	1348	0.16	0.00014	9606.ENSP00000157600,9606.ENSP00000209728,9606.ENSP00000212015,9606.ENSP00000216037,9606.ENSP00000217958,9606.ENSP00000221452,9606.ENSP00000222329,9606.ENSP00000225688,9606.ENSP00000226574,9606.ENSP00000229416,9606.ENSP00000230321,9606.ENSP00000230990,9606.ENSP00000234198,9606.ENSP00000235382,9606.ENSP00000239223,9606.ENSP00000242728,9606.ENSP00000244050,9606.ENSP00000244869,9606.ENSP00000245414,…	LMCD1,CDC6,SIRT1,XBP1,PSMD10,RELB,ERF,RASD1,NFKB1,GCLC,MDFI,HBEGF,DLX2,RGS2,DUSP1,BHLHE41,SNAI1,EREG,IRF1,FOSB,NR1D1,DLL4,FXR2,EAPP,JUND,SESN2,THAP1,DNAJB1,RRP8,H3F3B,EIF2S1,MBD2,BHLHE40,BACH2,AKIRIN2,USP2,TRIM37,EPC1,MXD1,LEF1,UBE2B,CREM,BTAF1,JDP2,FBXW7,NIPBL,TRIM11,FLCN,PPARG,ZNF281,REL,MITF,NFIL3,TSC1,RUNX1,LRP8,RNF139,CEBPB,PPM1D,DONSON,EIF2AK3,ZBTB5,ZNF608,ZNF239,MEPCE,ZNF431,NR1D2,PPARD,DA…
GO:0010648	negative regulation of cell communication	162	1255	0.17	0.00015	9606.ENSP00000014914,9606.ENSP00000166139,9606.ENSP00000198767,9606.ENSP00000200453,9606.ENSP00000212015,9606.ENSP00000216037,9606.ENSP00000216117,9606.ENSP00000216797,9606.ENSP00000217958,9606.ENSP00000223095,9606.ENSP00000225174,9606.ENSP00000229416,9606.ENSP00000230321,9606.ENSP00000234198,9606.ENSP00000235382,9606.ENSP00000239223,9606.ENSP00000239882,9606.ENSP00000244050,9606.ENSP00000246672,…	GPRC5A,FSTL3,RRN3,PPP1R15A,SIRT1,XBP1,HMOX1,NFKBIA,PSMD10,SERPINE1,PPIF,GCLC,MDFI,DLX2,RGS2,DUSP1,ELF1,SNAI1,NR1D1,TICAM1,LIF,DNAJB9,DLL4,CHRNA10,RAF1,GDF15,SESN2,RAB11FIP5,RIPK1,THBS1,NLRC5,UFD1L,IL1A,ACVR1,MUL1,ICAM1,PPARGC1A,ARRDC3,LEF1,UBE2B,FSTL4,MAPKAP1,PLK2,TNFRSF10B,FBXW7,PTPRR,SH3RF1,FLCN,PPARG,BRAF,DUSP2,SENP2,NDUFAF2,F2RL1,TSC1,TMEM88,CXCL8,DDIT4,ADAM17,TRIB1,CFLAR,DAB2,PER1,CLU,PIBF1,…
GO:0043065	positive regulation of apoptotic process	91	604	0.24	0.00015	9606.ENSP00000179259,9606.ENSP00000202556,9606.ENSP00000212015,9606.ENSP00000215631,9606.ENSP00000216037,9606.ENSP00000216117,9606.ENSP00000216373,9606.ENSP00000220751,9606.ENSP00000225174,9606.ENSP00000239223,9606.ENSP00000246229,9606.ENSP00000250457,9606.ENSP00000252506,9606.ENSP00000256015,9606.ENSP00000256383,9606.ENSP00000259808,9606.ENSP00000260356,9606.ENSP00000262710,9606.ENSP00000264198,…	C12orf5,PPP1R13B,SIRT1,GADD45B,XBP1,HMOX1,SOS2,RIPK2,PPIF,DUSP1,PLAGL2,EGLN3,GADD45G,BTG1,EIF2S1,RIPK1,THBS1,ACIN1,MUL1,RAPGEF2,PPARGC1A,SIK1,RHOB,TNFRSF10B,FBXW7,FLCN,PPARG,IL12A,YWHAG,EIF2AK3,CYCS,ZNF622,FOSL1,CLU,STK17A,DCUN1D3,PMAIP1,TNFRSF12A,SMAD3,CAV1,PLAUR,SFN,ATF3,NET1,VCP,AKAP13,OSGIN1,CTGF,PEA15,MCL1,BCL10,GADD45A,JUN,ANKRD1,ZC3H12A,MTCH1,BAK1,TRIM39,BMP2,RGCC,XDH,NKX3-1,IGFBP3,ITSN1,C…
GO:0023057	negative regulation of signaling	162	1258	0.17	0.00017	9606.ENSP00000014914,9606.ENSP00000166139,9606.ENSP00000198767,9606.ENSP00000200453,9606.ENSP00000212015,9606.ENSP00000216037,9606.ENSP00000216117,9606.ENSP00000216797,9606.ENSP00000217958,9606.ENSP00000223095,9606.ENSP00000225174,9606.ENSP00000229416,9606.ENSP00000230321,9606.ENSP00000234198,9606.ENSP00000235382,9606.ENSP00000239223,9606.ENSP00000239882,9606.ENSP00000244050,9606.ENSP00000246672,…	GPRC5A,FSTL3,RRN3,PPP1R15A,SIRT1,XBP1,HMOX1,NFKBIA,PSMD10,SERPINE1,PPIF,GCLC,MDFI,DLX2,RGS2,DUSP1,ELF1,SNAI1,NR1D1,TICAM1,LIF,DNAJB9,DLL4,CHRNA10,RAF1,GDF15,SESN2,RAB11FIP5,RIPK1,THBS1,NLRC5,UFD1L,IL1A,ACVR1,MUL1,ICAM1,PPARGC1A,ARRDC3,LEF1,UBE2B,FSTL4,MAPKAP1,PLK2,TNFRSF10B,FBXW7,PTPRR,SH3RF1,FLCN,PPARG,BRAF,DUSP2,SENP2,NDUFAF2,F2RL1,TSC1,TMEM88,CXCL8,DDIT4,ADAM17,TRIB1,CFLAR,DAB2,PER1,CLU,PIBF1,…
GO:0035556	intracellular signal transduction	190	1528	0.15	0.00017	9606.ENSP00000013125,9606.ENSP00000200453,9606.ENSP00000202556,9606.ENSP00000212015,9606.ENSP00000216037,9606.ENSP00000216117,9606.ENSP00000216373,9606.ENSP00000216797,9606.ENSP00000220507,9606.ENSP00000220751,9606.ENSP00000221452,9606.ENSP00000224140,9606.ENSP00000225688,9606.ENSP00000226574,9606.ENSP00000230990,9606.ENSP00000234420,9606.ENSP00000239223,9606.ENSP00000244869,9606.ENSP00000246914,…	MAP4K5,PPP1R15A,PPP1R13B,SIRT1,XBP1,HMOX1,SOS2,NFKBIA,RHOV,RIPK2,RELB,SETX,RASD1,NFKB1,HBEGF,MSH6,DUSP1,EREG,WNK4,TICAM1,LIF,MKNK2,RAF1,SESN2,RRP8,IRAK2,RIPK1,SDCBP,ARHGAP29,MAPK6,PIK3C3,WSB1,TRAF4,MAP3K8,BIRC3,ARID3A,MAP4K3,MUL1,ALS2,PIKFYVE,RASGEF1B,RAPGEF2,ASB1,MAP3K13,MAPKAP1,RHOF,SIK1,RHOB,PLK2,TNFRSF10B,ASB6,PPP4C,TJP1,FLCN,BATF,PRKAG2,BRAF,FGF19,REL,SNRK,SNIP1,RHEBL1,ADORA2B,CEBPB,PRKCE,CX…
GO:0032496	response to lipopolysaccharide	54	298	0.32	0.00019	9606.ENSP00000064780,9606.ENSP00000216037,9606.ENSP00000216797,9606.ENSP00000220751,9606.ENSP00000223095,9606.ENSP00000226574,9606.ENSP00000227752,9606.ENSP00000228606,9606.ENSP00000246672,9606.ENSP00000248244,9606.ENSP00000252818,9606.ENSP00000256458,9606.ENSP00000256722,9606.ENSP00000257787,9606.ENSP00000264832,9606.ENSP00000264867,9606.ENSP00000269701,9606.ENSP00000276431,9606.ENSP00000280614,…	RELT,XBP1,NFKBIA,RIPK2,SERPINE1,NFKB1,IL10RA,CYP27B1,NR1D1,TICAM1,JUND,IRAK2,CMPK2,AKIRIN2,ICAM1,PPARGC1A,AKAP8,TNFRSF10B,CCRN4L,CXCL3,CXCL5,IL12A,CEBPB,PRKCE,CXCL8,ADAM17,TNFRSF10D,PPARD,TRIB1,NFKBIB,PDE4B,PELI1,CTR9,DUSP10,NFKB2,CHUK,ABCC2,JUN,ANKRD1,ZC3H12A,PTAFR,EDN1,CXCL1,VIMP,IL18BP,RELA,GCH1,CXCL2,TRAF6,ADM,ATP2A2,LITAF,TNFRSF9,TNFAIP3
GO:0010942	positive regulation of cell death	97	663	0.22	0.00021	9606.ENSP00000179259,9606.ENSP00000202556,9606.ENSP00000212015,9606.ENSP00000215631,9606.ENSP00000216037,9606.ENSP00000216117,9606.ENSP00000216373,9606.ENSP00000220751,9606.ENSP00000225174,9606.ENSP00000239223,9606.ENSP00000246229,9606.ENSP00000250457,9606.ENSP00000252506,9606.ENSP00000256015,9606.ENSP00000256383,9606.ENSP00000259808,9606.ENSP00000260356,9606.ENSP00000262710,9606.ENSP00000264198,…	C12orf5,PPP1R13B,SIRT1,GADD45B,XBP1,HMOX1,SOS2,RIPK2,PPIF,DUSP1,PLAGL2,EGLN3,GADD45G,BTG1,EIF2S1,RIPK1,THBS1,ACIN1,MUL1,RAPGEF2,PPARGC1A,SIK1,RHOB,TNFRSF10B,FBXW7,FLCN,PPARG,IL12A,YWHAG,EIF2AK3,DDIT4,CYCS,ZNF622,FOSL1,CLU,SSH1,STK17A,DCUN1D3,PMAIP1,TNFRSF12A,SMAD3,CAV1,PLAUR,SFN,ATF3,NET1,VCP,AKAP13,OSGIN1,CTGF,PEA15,MCL1,BCL10,GADD45A,JUN,ANKRD1,ZC3H12A,MTCH1,DKK1,BAK1,TRIM39,BMP2,RGCC,XDH,NKX3-…
GO:0060548	negative regulation of cell death	129	953	0.19	0.00021	9606.ENSP00000179259,9606.ENSP00000198767,9606.ENSP00000212015,9606.ENSP00000216037,9606.ENSP00000216117,9606.ENSP00000216489,9606.ENSP00000216797,9606.ENSP00000217402,9606.ENSP00000217958,9606.ENSP00000220751,9606.ENSP00000223095,9606.ENSP00000224140,9606.ENSP00000225174,9606.ENSP00000226574,9606.ENSP00000229416,9606.ENSP00000231668,9606.ENSP00000239223,9606.ENSP00000244050,9606.ENSP00000251849,…	C12orf5,RRN3,SIRT1,XBP1,HMOX1,ALKBH1,NFKBIA,CHMP4B,PSMD10,RIPK2,SERPINE1,SETX,PPIF,NFKB1,GCLC,BNIP1,DUSP1,SNAI1,RAF1,RIPK1,IER3,THBS1,CCND2,C19orf10,IL1A,BIRC3,ACVR1,ICAM1,PPARGC1A,GOLPH3,LEF1,UBE2B,NPC1,PLK2,TNFRSF10B,SLC25A4,SH3RF1,BRAF,REL,MITF,ANXA5,TSC1,HSP90B1,ANGPTL4,CEBPB,PDE12,CLCF1,TNFRSF10D,PPARD,CFLAR,DAB2,SPHK1,CLU,EGR3,HSPH1,MALT1,SIAH2,HSPA5,SOCS3,SMAD3,ARHGAP10,CAV1,PLAUR,SFN,CREB…
GO:1902532	negative regulation of intracellular signal transduction	80	514	0.25	0.00021	9606.ENSP00000198767,9606.ENSP00000212015,9606.ENSP00000216037,9606.ENSP00000217958,9606.ENSP00000225174,9606.ENSP00000235382,9606.ENSP00000239223,9606.ENSP00000244050,9606.ENSP00000249075,9606.ENSP00000250699,9606.ENSP00000253063,9606.ENSP00000259808,9606.ENSP00000260356,9606.ENSP00000263202,9606.ENSP00000264198,9606.ENSP00000265138,9606.ENSP00000265339,9606.ENSP00000265960,9606.ENSP00000283228,…	RRN3,SIRT1,XBP1,PSMD10,PPIF,RGS2,DUSP1,SNAI1,LIF,CHRNA10,SESN2,RIPK1,THBS1,UFD1L,MUL1,ARRDC3,UBE2B,MAPKAP1,PTPRR,FLCN,DUSP2,SENP2,F2RL1,TSC1,DDIT4,PER1,CLU,PIBF1,HSPH1,SOCS3,NPLOC4,CAV1,PLAUR,RIOK3,CREB3,ATF3,ARHGAP12,EPHA2,GPATCH3,DUSP10,DYRK3,RASAL2,EFNA1,MCL1,DUSP5,PTPN1,ZC3H12A,KLF4,OTUD3,SYVN1,ERRFI1,FLRT3,OPTN,XDH,GPS2,TAF9,RCAN1,STAMBP,NFE2L2,DUSP8,VIMP,WWC2,RELA,BCL6,ARNTL,FHL2,SH3BP4,CYL…
GO:0009896	positive regulation of catabolic process	66	399	0.28	0.00025	9606.ENSP00000157812,9606.ENSP00000171111,9606.ENSP00000212015,9606.ENSP00000216037,9606.ENSP00000216117,9606.ENSP00000217958,9606.ENSP00000220751,9606.ENSP00000221566,9606.ENSP00000229416,9606.ENSP00000248244,9606.ENSP00000253063,9606.ENSP00000264198,9606.ENSP00000274289,9606.ENSP00000281708,9606.ENSP00000285071,9606.ENSP00000287437,9606.ENSP00000294179,9606.ENSP00000298552,9606.ENSP00000304051,…	PSMC4,KEAP1,SIRT1,XBP1,HMOX1,PSMD10,RIPK2,SGTA,GCLC,TICAM1,SESN2,MUL1,PLK2,FBXW7,FLCN,NSMCE2,STX5,TSC1,RNF139,PRKCE,TRIB1,DAB2,ZFAND2A,CLU,RCHY1,RNF166,RAB12,HSP90AA1,DNAJB2,CAV1,RNF41,NRD1,UVRAG,MYLIP,VCP,SUPV3L1,SMURF1,PTPN1,LONRF3,PLK3,ZC3H12A,RNF19B,TP53INP2,PIM2,OPTN,NFE2L2,LONRF1,NEDD4L,RDX,SH3BP4,GIGYF2,ABHD5,GPSM1,NANOS1,PNPT1,HERPUD1,TIPARP,TOB1,PFKFB3,LDLR,OAZ1,YTHDF3,ITCH,TNFAIP3,C9orf…
GO:0065009	regulation of molecular function	366	3322	0.1	0.00025	9606.ENSP00000013125,9606.ENSP00000014914,9606.ENSP00000033079,9606.ENSP00000171111,9606.ENSP00000179259,9606.ENSP00000200453,9606.ENSP00000209728,9606.ENSP00000212015,9606.ENSP00000215631,9606.ENSP00000216117,9606.ENSP00000216373,9606.ENSP00000216489,9606.ENSP00000216797,9606.ENSP00000217958,9606.ENSP00000218516,9606.ENSP00000220751,9606.ENSP00000222553,9606.ENSP00000223095,9606.ENSP00000225174,…	MAP4K5,GPRC5A,FAM13B,KEAP1,C12orf5,PPP1R15A,CDC6,SIRT1,GADD45B,HMOX1,SOS2,ALKBH1,NFKBIA,PSMD10,GLA,RIPK2,NAMPT,SERPINE1,PPIF,NFKB1,CSRNP2,CYP27B1,MDFI,GUCA1B,HBEGF,MSH6,RGS2,DUSP1,MPHOSPH10,EREG,TNFSF9,WNK4,TICAM1,LIF,EGLN3,RAF1,GADD45G,GDF15,CEP85,SESN2,ZCCHC9,DNAJB1,EIF2S1,ELP3,MBD2,IRAK2,BHLHE40,AKIRIN2,RIPK1,DCUN1D5,THBS1,ARHGAP29,PREB,CCND2,FAF2,MMD,TSPAN13,TMED2,TRIM37,TRAF4,NLRC5,ELL,MAP3K…
GO:0019941	modification-dependent protein catabolic process	74	467	0.26	0.00026	9606.ENSP00000157812,9606.ENSP00000158771,9606.ENSP00000185150,9606.ENSP00000212015,9606.ENSP00000216037,9606.ENSP00000219313,9606.ENSP00000221566,9606.ENSP00000237455,9606.ENSP00000242719,9606.ENSP00000247977,9606.ENSP00000249356,9606.ENSP00000256257,9606.ENSP00000260187,9606.ENSP00000261712,9606.ENSP00000261942,9606.ENSP00000263202,9606.ENSP00000264639,9606.ENSP00000265339,9606.ENSP00000265562,…	PSMC4,DERL2,ERLEC1,SIRT1,XBP1,PSMD7,SGTA,RNF103,RNF11,FBXL12,DNAJB9,RNF122,USP2,PSMD11,FAF2,UFD1L,PSMD3,UBE2B,PTPN23,COPS3,RNF7,USP15,FBXW7,USP12,UBAP1,HSP90B1,KCTD5,RNF139,RNF181,FBXO45,KCTD2,KLHL11,TOLLIP,VPS37A,RCHY1,SIAH2,HSPA5,YOD1,NPLOC4,KLHL25,DNAJB2,KCTD21,KCTD6,MYLIP,TRIM38,VCP,ZRANB1,TOPORS,SMURF1,BTRC,TP53INP2,UBR4,SYVN1,ISG15,SQSTM1,USP8,NFE2L2,VIMP,USP25,NEDD4L,ARNTL,CYLD,HERPUD1,ABT…
GO:0031331	positive regulation of cellular catabolic process	59	343	0.29	0.00027	9606.ENSP00000157812,9606.ENSP00000171111,9606.ENSP00000212015,9606.ENSP00000216037,9606.ENSP00000216117,9606.ENSP00000217958,9606.ENSP00000220751,9606.ENSP00000221566,9606.ENSP00000229416,9606.ENSP00000248244,9606.ENSP00000253063,9606.ENSP00000264198,9606.ENSP00000274289,9606.ENSP00000281708,9606.ENSP00000285071,9606.ENSP00000287437,9606.ENSP00000298552,9606.ENSP00000304051,9606.ENSP00000312150,…	PSMC4,KEAP1,SIRT1,XBP1,HMOX1,PSMD10,RIPK2,SGTA,GCLC,TICAM1,SESN2,MUL1,PLK2,FBXW7,FLCN,NSMCE2,TSC1,RNF139,TRIB1,DAB2,ZFAND2A,CLU,RCHY1,RNF166,RAB12,HSP90AA1,DNAJB2,CAV1,NRD1,UVRAG,VCP,SUPV3L1,SMURF1,PTPN1,LONRF3,PLK3,ZC3H12A,RNF19B,TP53INP2,PIM2,OPTN,NFE2L2,LONRF1,RDX,SH3BP4,GIGYF2,ABHD5,GPSM1,NANOS1,PNPT1,HERPUD1,TOB1,PFKFB3,LDLR,YTHDF3,ITCH,TNFAIP3,C9orf72,IKBKG
GO:0043632	modification-dependent macromolecule catabolic process	75	476	0.25	0.00027	9606.ENSP00000157812,9606.ENSP00000158771,9606.ENSP00000185150,9606.ENSP00000212015,9606.ENSP00000216037,9606.ENSP00000219313,9606.ENSP00000221566,9606.ENSP00000237455,9606.ENSP00000242719,9606.ENSP00000247977,9606.ENSP00000249356,9606.ENSP00000256257,9606.ENSP00000260187,9606.ENSP00000261712,9606.ENSP00000261942,9606.ENSP00000263202,9606.ENSP00000264639,9606.ENSP00000265339,9606.ENSP00000265562,…	PSMC4,DERL2,ERLEC1,SIRT1,XBP1,PSMD7,SGTA,RNF103,RNF11,FBXL12,DNAJB9,RNF122,USP2,PSMD11,FAF2,UFD1L,PSMD3,UBE2B,PTPN23,COPS3,RNF7,USP15,FBXW7,USP12,UBAP1,HSP90B1,KCTD5,RNF139,RNF181,FBXO45,KCTD2,KLHL11,TOLLIP,VPS37A,RCHY1,SIAH2,HSPA5,YOD1,NPLOC4,KLHL25,DNAJB2,KCTD21,KCTD6,MYLIP,TRIM38,VCP,ZRANB1,TOPORS,SMURF1,BTRC,TP53INP2,UBR4,SYVN1,ISG15,SQSTM1,USP8,NFE2L2,VIMP,USP25,NEDD4L,ARNTL,CYLD,PNPT1,HERPU…
GO:1903362	regulation of cellular protein catabolic process	47	248	0.33	0.00027	9606.ENSP00000157812,9606.ENSP00000158771,9606.ENSP00000171111,9606.ENSP00000185150,9606.ENSP00000216037,9606.ENSP00000217958,9606.ENSP00000221566,9606.ENSP00000229416,9606.ENSP00000260130,9606.ENSP00000262384,9606.ENSP00000274289,9606.ENSP00000281708,9606.ENSP00000287437,9606.ENSP00000304051,9606.ENSP00000312150,9606.ENSP00000313391,9606.ENSP00000314619,9606.ENSP00000315130,9606.ENSP00000321239,…	PSMC4,DERL2,KEAP1,ERLEC1,XBP1,PSMD10,SGTA,GCLC,SDCBP,N4BP1,PLK2,FBXW7,NSMCE2,RNF139,TRIB1,DAB2,ZFAND2A,CLU,RCHY1,RNF166,YOD1,HSP90AA1,DNAJB2,CAV1,MYLIP,VCP,DDA1,SMURF1,EFNA1,BTRC,LONRF3,PLK3,RNF19B,TRIM39,TAF9,NFE2L2,LONRF1,TMF1,USP25,RDX,HERPUD1,RIC1,RYBP,SH3RF2,UBE2J1,LDLR,TNFAIP3
GO:0038061	NIK/NF-kappaB signaling	15	35	0.69	0.00029	9606.ENSP00000221452,9606.ENSP00000226574,9606.ENSP00000262395,9606.ENSP00000263464,9606.ENSP00000276431,9606.ENSP00000279387,9606.ENSP00000295025,9606.ENSP00000319279,9606.ENSP00000358983,9606.ENSP00000359206,9606.ENSP00000359424,9606.ENSP00000389600,9606.ENSP00000433623,9606.ENSP00000477613,9606.ENSP00000482657	RELB,NFKB1,TRAF4,BIRC3,TNFRSF10B,PPP4C,REL,MALT1,NFKB2,BTRC,CHUK,TLR6,TRAF6,BIRC2,MAP3K14
GO:0006511	ubiquitin-dependent protein catabolic process	73	461	0.26	0.0003	9606.ENSP00000157812,9606.ENSP00000158771,9606.ENSP00000185150,9606.ENSP00000212015,9606.ENSP00000216037,9606.ENSP00000219313,9606.ENSP00000221566,9606.ENSP00000237455,9606.ENSP00000242719,9606.ENSP00000247977,9606.ENSP00000249356,9606.ENSP00000256257,9606.ENSP00000260187,9606.ENSP00000261712,9606.ENSP00000261942,9606.ENSP00000263202,9606.ENSP00000264639,9606.ENSP00000265339,9606.ENSP00000265562,…	PSMC4,DERL2,ERLEC1,SIRT1,XBP1,PSMD7,SGTA,RNF103,RNF11,FBXL12,DNAJB9,RNF122,USP2,PSMD11,FAF2,UFD1L,PSMD3,UBE2B,PTPN23,COPS3,RNF7,USP15,FBXW7,USP12,UBAP1,HSP90B1,KCTD5,RNF139,RNF181,FBXO45,KCTD2,KLHL11,TOLLIP,VPS37A,RCHY1,SIAH2,HSPA5,YOD1,NPLOC4,KLHL25,DNAJB2,KCTD21,KCTD6,MYLIP,TRIM38,VCP,ZRANB1,TOPORS,SMURF1,BTRC,TP53INP2,UBR4,SYVN1,SQSTM1,USP8,NFE2L2,VIMP,USP25,NEDD4L,ARNTL,CYLD,HERPUD1,ABTB2,RNF…
GO:0044265	cellular macromolecule catabolic process	116	842	0.2	0.0003	9606.ENSP00000157812,9606.ENSP00000158771,9606.ENSP00000171111,9606.ENSP00000185150,9606.ENSP00000212015,9606.ENSP00000216037,9606.ENSP00000217402,9606.ENSP00000219313,9606.ENSP00000221566,9606.ENSP00000237455,9606.ENSP00000242719,9606.ENSP00000246672,9606.ENSP00000247020,9606.ENSP00000247977,9606.ENSP00000248958,9606.ENSP00000249356,9606.ENSP00000256257,9606.ENSP00000259808,9606.ENSP00000260187,…	PSMC4,DERL2,KEAP1,ERLEC1,SIRT1,XBP1,CHMP4B,PSMD7,SGTA,RNF103,RNF11,NR1D1,SDF2,FBXL12,SDF2L1,DNAJB9,RNF122,RIPK1,USP2,PSMD11,FAF2,UFD1L,PSMD3,UBE2B,PTPN23,GET4,WDR61,COPS3,RNF7,PELO,USP15,CCRN4L,FBXW7,USP12,TMEM199,UBAP1,HSP90B1,KCTD5,RNF139,ISG20,RNF181,PDE12,FBXO45,LSM1,KCTD2,KLHL11,ZHX2,TOLLIP,VPS37A,EDC3,RCHY1,SIAH2,HSPA5,PPP2R2A,PMAIP1,YOD1,NPLOC4,RAB12,DHX34,KLHL25,PNRC1,DNAJB2,KCTD21,GSPT2,…
GO:0016567	protein ubiquitination	94	645	0.22	0.00032	9606.ENSP00000171111,9606.ENSP00000212015,9606.ENSP00000232766,9606.ENSP00000233630,9606.ENSP00000237281,9606.ENSP00000237455,9606.ENSP00000242719,9606.ENSP00000247977,9606.ENSP00000255764,9606.ENSP00000256257,9606.ENSP00000257749,9606.ENSP00000262294,9606.ENSP00000262394,9606.ENSP00000263464,9606.ENSP00000264198,9606.ENSP00000264607,9606.ENSP00000265339,9606.ENSP00000267973,9606.ENSP00000268042,…	KEAP1,SIRT1,KLHL18,PCGF1,FBXO30,RNF103,RNF11,FBXL12,MED10,RNF122,BACH2,TRIM37,WSB1,BIRC3,MUL1,ASB1,UBE2B,WDR61,ARRDC4,RNF7,ASB6,FBXW7,TRIM36,TRIM11,SH3RF1,MED8,MED27,RNF25,UNKL,RNF139,RNFT1,RNF181,FBXO45,MALT1,RCHY1,RNF10,SIAH2,UBE2O,RNF166,SPSB1,SOCS3,KLHL25,KCTD21,RNF41,KCTD6,MYLIP,TRIM38,VCP,PELI1,TOPORS,SMURF1,CTR9,BTRC,BCL10,TNKS2,LONRF3,TMEM189,RNF19B,UBR4,TRIM39,SYVN1,KLHL21,TRIM5,FBXL18,U…
GO:0032446	protein modification by small protein conjugation	99	690	0.21	0.00032	9606.ENSP00000171111,9606.ENSP00000212015,9606.ENSP00000232766,9606.ENSP00000233630,9606.ENSP00000237281,9606.ENSP00000237455,9606.ENSP00000242719,9606.ENSP00000247977,9606.ENSP00000255764,9606.ENSP00000256257,9606.ENSP00000257749,9606.ENSP00000260247,9606.ENSP00000262294,9606.ENSP00000262394,9606.ENSP00000263464,9606.ENSP00000264198,9606.ENSP00000264607,9606.ENSP00000265339,9606.ENSP00000267973,…	KEAP1,SIRT1,KLHL18,PCGF1,FBXO30,RNF103,RNF11,FBXL12,MED10,RNF122,BACH2,DCUN1D5,TRIM37,WSB1,BIRC3,MUL1,ASB1,UBE2B,WDR61,ARRDC4,RNF7,ASB6,FBXW7,TRIM36,TRIM11,SH3RF1,NSMCE2,MED8,MED27,RNF25,SENP2,UNKL,RNF139,RNFT1,RNF181,FBXO45,MALT1,DCUN1D3,RCHY1,RNF10,SIAH2,UBE2O,RNF166,SPSB1,SOCS3,KLHL25,KCTD21,RNF41,KCTD6,MYLIP,TRIM38,VCP,PELI1,TOPORS,SMURF1,CTR9,BTRC,BCL10,TNKS2,LONRF3,TMEM189,RNF19B,UBR4,TRIM3…
GO:0051338	regulation of transferase activity	129	964	0.18	0.00032	9606.ENSP00000013125,9606.ENSP00000014914,9606.ENSP00000179259,9606.ENSP00000209728,9606.ENSP00000212015,9606.ENSP00000215631,9606.ENSP00000217958,9606.ENSP00000220751,9606.ENSP00000235382,9606.ENSP00000239223,9606.ENSP00000244869,9606.ENSP00000251849,9606.ENSP00000252506,9606.ENSP00000252809,9606.ENSP00000252992,9606.ENSP00000253063,9606.ENSP00000256398,9606.ENSP00000256458,9606.ENSP00000259808,…	MAP4K5,GPRC5A,C12orf5,CDC6,SIRT1,GADD45B,PSMD10,RIPK2,RGS2,DUSP1,EREG,RAF1,GADD45G,GDF15,CEP85,SESN2,ELP3,IRAK2,RIPK1,DCUN1D5,THBS1,CCND2,MMD,TRAF4,NLRC5,MAP3K8,MAP4K3,CCNT2,MUL1,ALS2,RAPGEF2,MAP3K13,ARRDC3,MAPKAP1,GTF2H1,ARRDC4,TNFRSF10B,CDKN2B,NRBF2,FBXW7,PPARG,PRKAG2,BRAF,DUSP2,TGFA,CCNL1,KIAA0226,TSC1,CRK,LRP8,CDC25A,ADORA2B,IBTK,YWHAG,ADAM17,ZNF622,TRIB1,CLU,PIBF1,HSPH1,PINX1,CHORDC1,MALT1,D…
GO:0071496	cellular response to external stimulus	54	305	0.31	0.00032	9606.ENSP00000212015,9606.ENSP00000215904,9606.ENSP00000216037,9606.ENSP00000216117,9606.ENSP00000226574,9606.ENSP00000229416,9606.ENSP00000245414,9606.ENSP00000253063,9606.ENSP00000254605,9606.ENSP00000256383,9606.ENSP00000262039,9606.ENSP00000264832,9606.ENSP00000266458,9606.ENSP00000276431,9606.ENSP00000276925,9606.ENSP00000287820,9606.ENSP00000297991,9606.ENSP00000298552,9606.ENSP00000299767,…	SIRT1,PDXP,XBP1,HMOX1,NFKB1,GCLC,IRF1,SESN2,RRP8,EIF2S1,PIK3C3,ICAM1,GABARAPL1,TNFRSF10B,CDKN2B,PPARG,AQP3,TSC1,HSP90B1,FOXA3,ADORA2B,PPM1D,EIF2AK3,TBL2,FOSL1,SSH1,HSPA5,PMAIP1,UPP1,CAV1,MIOS,ATF3,NR4A2,P2RX4,NUAK2,GLRX2,BAG3,BCL10,GADD45A,JUN,ANKRD1,RRAGC,ZC3H12A,PIM1,BAK1,HABP4,NFE2L2,CDKN1A,ATP2B1,CADPS2,MAP2K4,FNIP1,BHLHA15,MAP3K14
GO:1903320	regulation of protein modification by small protein conjugation or removal	43	220	0.35	0.00033	9606.ENSP00000217958,9606.ENSP00000220751,9606.ENSP00000229416,9606.ENSP00000248244,9606.ENSP00000260247,9606.ENSP00000262384,9606.ENSP00000263464,9606.ENSP00000264198,9606.ENSP00000265138,9606.ENSP00000268042,9606.ENSP00000281708,9606.ENSP00000296257,9606.ENSP00000304051,9606.ENSP00000306124,9606.ENSP00000313681,9606.ENSP00000314733,9606.ENSP00000318966,9606.ENSP00000319279,9606.ENSP00000319482,…	PSMD10,RIPK2,GCLC,TICAM1,DCUN1D5,N4BP1,BIRC3,MUL1,ARRDC3,ARRDC4,FBXW7,SENP2,RNF139,PRKCE,SPHK1,TOLLIP,PINX1,MALT1,DCUN1D3,RCHY1,SIAH2,HSPA5,HSP90AA1,DNAJB2,CAV1,RASSF1,VCP,PELI1,TOPORS,CTR9,BCL10,ZC3H12A,HSPA1B,ISG15,GPS2,RELA,HERPUD1,DCUN1D2,UBR5,TRAF6,BIRC2,ITCH,TNFAIP3
GO:0045089	positive regulation of innate immune response	48	259	0.33	0.00034	9606.ENSP00000216797,9606.ENSP00000220751,9606.ENSP00000221452,9606.ENSP00000226574,9606.ENSP00000229332,9606.ENSP00000244869,9606.ENSP00000248244,9606.ENSP00000251849,9606.ENSP00000256458,9606.ENSP00000259808,9606.ENSP00000262039,9606.ENSP00000262510,9606.ENSP00000265983,9606.ENSP00000296677,9606.ENSP00000299767,9606.ENSP00000303231,9606.ENSP00000306124,9606.ENSP00000319279,9606.ENSP00000334564,…	NFKBIA,RIPK2,RELB,NFKB1,CLEC4A,EREG,TICAM1,RAF1,IRAK2,RIPK1,PIK3C3,NLRC5,HPX,F2RL1,HSP90B1,IL12A,PRKCE,MALT1,POLR3C,CAV1,RIOK3,PSPC1,ANKRD17,PELI1,CHUK,BCL10,PTAFR,HSPA1B,DDX58,TRIM5,RSAD2,AP1G1,POLR3D,POLR3G,RELA,TLR6,CYLD,PVR,MUC20,MUC4,TRAF6,UBC,TRAF3,RPS6KA5,ITCH,TNFAIP3,IKBKG,MUC5AC
GO:0008219	cell death	141	1080	0.17	0.00036	9606.ENSP00000064780,9606.ENSP00000179259,9606.ENSP00000200453,9606.ENSP00000202556,9606.ENSP00000212015,9606.ENSP00000215631,9606.ENSP00000216037,9606.ENSP00000216117,9606.ENSP00000216797,9606.ENSP00000217958,9606.ENSP00000220751,9606.ENSP00000225174,9606.ENSP00000226574,9606.ENSP00000228515,9606.ENSP00000229416,9606.ENSP00000231668,9606.ENSP00000234420,9606.ENSP00000238788,9606.ENSP00000245414,…	RELT,C12orf5,PPP1R15A,PPP1R13B,SIRT1,GADD45B,XBP1,HMOX1,NFKBIA,PSMD10,RIPK2,PPIF,NFKB1,CSRNP2,GCLC,BNIP1,MSH6,TMEM214,IRF1,TNFSF9,PLAGL2,TICAM1,EGLN3,MKNK2,RAF1,GADD45G,RRP8,RIPK1,IER3,TRAF4,ACIN1,C19orf10,IL1A,BIRC3,MUL1,ALS2,FOSL2,LEF1,PHLDA1,KRT10,EMP3,MEF2D,RHOB,CSRNP1,EAF2,TNFRSF10B,SLC25A4,SH3RF1,IL12A,CEBPB,PRKCE,DDIT4,CYCS,ZNF622,TNFRSF10D,PPARD,CFLAR,DAB2,CLU,STK17A,PHLDA2,SIAH2,HSPA5,PM…
GO:0032269	negative regulation of cellular protein metabolic process	134	1014	0.18	0.00036	9606.ENSP00000014914,9606.ENSP00000158771,9606.ENSP00000185150,9606.ENSP00000200453,9606.ENSP00000212015,9606.ENSP00000215631,9606.ENSP00000216037,9606.ENSP00000217958,9606.ENSP00000221566,9606.ENSP00000223095,9606.ENSP00000226574,9606.ENSP00000229416,9606.ENSP00000235382,9606.ENSP00000239223,9606.ENSP00000249075,9606.ENSP00000250113,9606.ENSP00000250699,9606.ENSP00000251849,9606.ENSP00000252992,…	GPRC5A,DERL2,ERLEC1,PPP1R15A,SIRT1,GADD45B,XBP1,PSMD10,SGTA,SERPINE1,NFKB1,GCLC,RGS2,DUSP1,LIF,FXR2,CHRNA10,RAF1,CEP85,SESN2,EIF2S1,SDCBP,THBS1,N4BP1,BIRC3,PPARGC1A,LEF1,UBE2B,TNFRSF10B,CDKN2B,PTPRR,SH3RF1,FLCN,PRKAG2,DUSP2,SENP2,F2RL1,TSC1,TERF2IP,RNF139,IBTK,PRKCE,YWHAG,EIF2AK3,DDIT4,BOD1,TNFRSF10D,TRIB1,CFLAR,PER1,PIBF1,HSPH1,PINX1,CHORDC1,CALR,SIAH2,YOD1,CLN8,SOCS3,DNAJB2,CAV1,PLAUR,SFN,ATF3,…
GO:0036498	IRE1-mediated unfolded protein response	18	52	0.6	0.00037	9606.ENSP00000216037,9606.ENSP00000222803,9606.ENSP00000249356,9606.ENSP00000260643,9606.ENSP00000262139,9606.ENSP00000262947,9606.ENSP00000314615,9606.ENSP00000323313,9606.ENSP00000324173,9606.ENSP00000328023,9606.ENSP00000360683,9606.ENSP00000364591,9606.ENSP00000364885,9606.ENSP00000366395,9606.ENSP00000378721,9606.ENSP00000386918,9606.ENSP00000418401,9606.ENSP00000473631	XBP1,FKBP14,DNAJB9,PREB,WIPI1,C19orf10,ARFGAP1,PDIA5,HSPA5,SRPR,PTPN1,TSPYL2,ZBTB17,SYVN1,SEC31A,KDELR3,SRPRB,DNAJC3
GO:0006979	response to oxidative stress	62	373	0.28	0.00038	9606.ENSP00000212015,9606.ENSP00000216037,9606.ENSP00000216117,9606.ENSP00000220659,9606.ENSP00000221130,9606.ENSP00000224140,9606.ENSP00000225174,9606.ENSP00000229416,9606.ENSP00000239223,9606.ENSP00000252229,9606.ENSP00000253063,9606.ENSP00000254846,9606.ENSP00000256015,9606.ENSP00000256383,9606.ENSP00000262746,9606.ENSP00000264276,9606.ENSP00000264867,9606.ENSP00000272233,9606.ENSP00000280612,…	SIRT1,XBP1,HMOX1,BRF2,GSR,SETX,PPIF,GCLC,DUSP1,MICB,SESN2,KDM6B,BTG1,EIF2S1,PRDX1,ALS2,PPARGC1A,RHOB,SLC7A11,CA3,CRK,CYCS,ZNF622,FOSL1,CFLAR,NR4A2,NET1,PPP1R15B,GLRX2,GCLM,CHUK,ABCC2,JUN,PLK3,MTF1,ZC3H12A,ADPRHL2,BAK1,KLF4,HSPA1B,EDN1,SRXN1,GPX3,ETS1,SLC11A2,NFE2L2,TRPM2,VIMP,IL18BP,RELA,ARNTL,FOXO3,PNPT1,TRA2B,SELK,CSB-PGBD3,CRYAB,TXNRD1,ATP2A2,CPEB2,TNFAIP3,NR4A3
GO:0002833	positive regulation of response to biotic stimulus	50	277	0.31	0.00041	9606.ENSP00000216797,9606.ENSP00000220751,9606.ENSP00000221452,9606.ENSP00000226574,9606.ENSP00000229332,9606.ENSP00000244869,9606.ENSP00000248244,9606.ENSP00000251849,9606.ENSP00000256458,9606.ENSP00000259808,9606.ENSP00000262039,9606.ENSP00000262510,9606.ENSP00000265983,9606.ENSP00000296677,9606.ENSP00000299767,9606.ENSP00000303231,9606.ENSP00000306124,9606.ENSP00000319279,9606.ENSP00000334564,…	NFKBIA,RIPK2,RELB,NFKB1,CLEC4A,EREG,TICAM1,RAF1,IRAK2,RIPK1,PIK3C3,NLRC5,HPX,F2RL1,HSP90B1,IL12A,PRKCE,MALT1,POLR3C,CAV1,RIOK3,PSPC1,ANKRD17,PELI1,CHUK,BCL10,PTAFR,HSPA1B,OPTN,DDX58,TRIM5,CD274,RSAD2,AP1G1,POLR3D,POLR3G,RELA,TLR6,CYLD,PVR,MUC20,MUC4,TRAF6,UBC,TRAF3,RPS6KA5,ITCH,TNFAIP3,IKBKG,MUC5AC
GO:0007030	Golgi organization	25	95	0.48	0.00042	9606.ENSP00000163416,9606.ENSP00000234160,9606.ENSP00000258654,9606.ENSP00000262225,9606.ENSP00000265070,9606.ENSP00000267622,9606.ENSP00000294179,9606.ENSP00000311336,9606.ENSP00000319169,9606.ENSP00000330945,9606.ENSP00000331487,9606.ENSP00000346139,9606.ENSP00000356782,9606.ENSP00000358071,9606.ENSP00000359305,9606.ENSP00000359665,9606.ENSP00000360183,9606.ENSP00000361057,9606.ENSP00000361275,…	GOLGA5,GORASP2,COG3,TMED2,GOLPH3,TRIP11,STX5,ATP8B3,PRMT5,TMED9,NPLOC4,TBC1D20,BLZF1,SEC23IP,TMED5,PI4K2A,STX16,SURF4,PLK3,TJAP1,OPTN,GOLGB1,RAB30,USO1,BHLHA15
GO:0051248	negative regulation of protein metabolic process	140	1075	0.17	0.00042	9606.ENSP00000014914,9606.ENSP00000158771,9606.ENSP00000185150,9606.ENSP00000200453,9606.ENSP00000212015,9606.ENSP00000215631,9606.ENSP00000216037,9606.ENSP00000217958,9606.ENSP00000221566,9606.ENSP00000223095,9606.ENSP00000226574,9606.ENSP00000229416,9606.ENSP00000230990,9606.ENSP00000235382,9606.ENSP00000239223,9606.ENSP00000249075,9606.ENSP00000250113,9606.ENSP00000250699,9606.ENSP00000251849,…	GPRC5A,DERL2,ERLEC1,PPP1R15A,SIRT1,GADD45B,XBP1,PSMD10,SGTA,SERPINE1,NFKB1,GCLC,HBEGF,RGS2,DUSP1,LIF,FXR2,CHRNA10,RAF1,CEP85,SESN2,EIF2S1,SDCBP,THBS1,N4BP1,BIRC3,ASB1,PPARGC1A,LEF1,UBE2B,TNFRSF10B,CDKN2B,PTPRR,SH3RF1,FLCN,PRKAG2,DUSP2,SENP2,F2RL1,TSC1,TERF2IP,RNF139,IBTK,SF3B3,PRKCE,YWHAG,EIF2AK3,DDIT4,BOD1,TNFRSF10D,TRIB1,CFLAR,PER1,CLU,PIBF1,HSPH1,PINX1,CHORDC1,CALR,SIAH2,YOD1,CLN8,SOCS3,SMAD3,…
GO:0016050	vesicle organization	55	318	0.3	0.00044	9606.ENSP00000217402,9606.ENSP00000220509,9606.ENSP00000220531,9606.ENSP00000222547,9606.ENSP00000223369,9606.ENSP00000223500,9606.ENSP00000237264,9606.ENSP00000260643,9606.ENSP00000262039,9606.ENSP00000262225,9606.ENSP00000262640,9606.ENSP00000264276,9606.ENSP00000265070,9606.ENSP00000267202,9606.ENSP00000280551,9606.ENSP00000291574,9606.ENSP00000294179,9606.ENSP00000295400,9606.ENSP00000301765,…	CHMP4B,VPS18,BLOC1S6,BET1,YKT6,CHMP5,TBPL1,PREB,PIK3C3,TMED2,VAMP7,ALS2,GOLPH3,VPS37B,SEC24D,TRAPPC10,STX5,TGFA,VPS37C,SEC22A,VPS37A,CALR,SEC16A,TMED9,STX3,SEC23B,CAV1,TBC1D20,TAP1,UVRAG,EXOC8,RAB32,SEC23IP,BLOC1S2,PI4K2A,STX16,SAR1A,STAM,LYST,SQSTM1,SNX11,AP1G1,SEC31A,USP8,TMF1,SEC24A,SAR1B,MCFD2,AGFG1,CREB1,AP1M1,SCFD1,BLOC1S3,USO1,TRAPPC3
GO:0042176	regulation of protein catabolic process	61	368	0.28	0.00046	9606.ENSP00000157812,9606.ENSP00000158771,9606.ENSP00000171111,9606.ENSP00000185150,9606.ENSP00000216037,9606.ENSP00000217958,9606.ENSP00000221566,9606.ENSP00000229416,9606.ENSP00000234111,9606.ENSP00000260130,9606.ENSP00000262384,9606.ENSP00000264639,9606.ENSP00000274289,9606.ENSP00000281708,9606.ENSP00000287437,9606.ENSP00000294179,9606.ENSP00000304051,9606.ENSP00000305790,9606.ENSP00000312150,…	PSMC4,DERL2,KEAP1,ERLEC1,XBP1,PSMD10,SGTA,GCLC,ODC1,SDCBP,N4BP1,PSMD3,PLK2,FBXW7,NSMCE2,STX5,RNF139,SF3B3,TRIB1,DAB2,ZFAND2A,CLU,RCHY1,RNF166,YOD1,SMAD3,HSP90AA1,DNAJB2,CAV1,RNF41,NRD1,MYLIP,VCP,DDA1,SMURF1,LRIG2,EFNA1,BTRC,LONRF3,PLK3,RNF19B,TRIM39,TAF9,NFE2L2,LONRF1,TMF1,USP25,NEDD4L,RDX,RELA,ARNTL,HERPUD1,RIC1,RYBP,TIPARP,SH3RF2,UBE2J1,LDLR,OAZ1,ITCH,TNFAIP3
GO:0012501	programmed cell death	136	1042	0.17	0.0005	9606.ENSP00000064780,9606.ENSP00000179259,9606.ENSP00000200453,9606.ENSP00000202556,9606.ENSP00000212015,9606.ENSP00000215631,9606.ENSP00000216037,9606.ENSP00000216117,9606.ENSP00000216797,9606.ENSP00000217958,9606.ENSP00000220751,9606.ENSP00000225174,9606.ENSP00000226574,9606.ENSP00000228515,9606.ENSP00000229416,9606.ENSP00000231668,9606.ENSP00000234420,9606.ENSP00000238788,9606.ENSP00000245414,…	RELT,C12orf5,PPP1R15A,PPP1R13B,SIRT1,GADD45B,XBP1,HMOX1,NFKBIA,PSMD10,RIPK2,PPIF,NFKB1,CSRNP2,GCLC,BNIP1,MSH6,TMEM214,IRF1,TNFSF9,PLAGL2,TICAM1,EGLN3,MKNK2,RAF1,GADD45G,RRP8,RIPK1,IER3,TRAF4,ACIN1,C19orf10,IL1A,BIRC3,MUL1,LEF1,PHLDA1,KRT10,MEF2D,RHOB,CSRNP1,EAF2,TNFRSF10B,SLC25A4,SH3RF1,IL12A,CEBPB,PRKCE,DDIT4,CYCS,ZNF622,TNFRSF10D,PPARD,CFLAR,DAB2,CLU,STK17A,PHLDA2,SIAH2,HSPA5,PMAIP1,TNFRSF12A,A…
GO:0032527	protein exit from endoplasmic reticulum	11	19	0.82	0.00054	9606.ENSP00000158771,9606.ENSP00000260643,9606.ENSP00000261942,9606.ENSP00000263202,9606.ENSP00000299767,9606.ENSP00000331487,9606.ENSP00000351777,9606.ENSP00000366395,9606.ENSP00000381237,9606.ENSP00000381282,9606.ENSP00000409555	DERL2,PREB,FAF2,UFD1L,HSP90B1,NPLOC4,VCP,SYVN1,HM13,VIMP,HERPUD1
GO:0044093	positive regulation of molecular function	205	1713	0.14	0.00054	9606.ENSP00000013125,9606.ENSP00000033079,9606.ENSP00000179259,9606.ENSP00000200453,9606.ENSP00000209728,9606.ENSP00000212015,9606.ENSP00000215631,9606.ENSP00000217958,9606.ENSP00000220751,9606.ENSP00000226574,9606.ENSP00000228606,9606.ENSP00000230361,9606.ENSP00000234420,9606.ENSP00000235382,9606.ENSP00000244869,9606.ENSP00000248244,9606.ENSP00000250457,9606.ENSP00000251849,9606.ENSP00000252506,…	MAP4K5,FAM13B,C12orf5,PPP1R15A,CDC6,SIRT1,GADD45B,PSMD10,RIPK2,NFKB1,CYP27B1,GUCA1B,MSH6,RGS2,EREG,TICAM1,EGLN3,RAF1,GADD45G,GDF15,DNAJB1,EIF2S1,MBD2,IRAK2,AKIRIN2,RIPK1,DCUN1D5,THBS1,ARHGAP29,PREB,CCND2,MMD,TRIM37,TRAF4,MAP3K8,ARFGAP3,MAP4K3,CCNT2,MUL1,ALS2,RASGEF1B,RAPGEF2,ICAM1,PPARGC1A,MAP3K13,ARRDC3,MAPKAP1,ARRDC4,PLK2,TNFRSF10B,PPRC1,FBXW7,NIPBL,PPARG,PRKAG2,BRAF,ARHGAP17,TGFA,RNF25,CCNL1,P…
GO:0036503	ERAD pathway	23	85	0.49	0.00062	9606.ENSP00000157812,9606.ENSP00000158771,9606.ENSP00000185150,9606.ENSP00000221566,9606.ENSP00000237455,9606.ENSP00000247020,9606.ENSP00000248958,9606.ENSP00000249356,9606.ENSP00000261942,9606.ENSP00000263202,9606.ENSP00000265857,9606.ENSP00000299767,9606.ENSP00000304051,9606.ENSP00000324173,9606.ENSP00000326813,9606.ENSP00000331487,9606.ENSP00000338019,9606.ENSP00000351777,9606.ENSP00000366395,…	PSMC4,DERL2,ERLEC1,SGTA,RNF103,SDF2,SDF2L1,DNAJB9,FAF2,UFD1L,GET4,HSP90B1,RNF139,HSPA5,YOD1,NPLOC4,DNAJB2,VCP,SYVN1,HM13,VIMP,HERPUD1,UBE2J1
GO:0006396	RNA processing	112	825	0.19	0.00067	9606.ENSP00000199320,9606.ENSP00000212015,9606.ENSP00000216038,9606.ENSP00000216252,9606.ENSP00000216489,9606.ENSP00000217109,9606.ENSP00000224140,9606.ENSP00000230340,9606.ENSP00000244230,9606.ENSP00000251636,9606.ENSP00000254605,9606.ENSP00000256398,9606.ENSP00000257181,9606.ENSP00000258770,9606.ENSP00000261708,9606.ENSP00000262710,9606.ENSP00000264867,9606.ENSP00000265963,9606.ENSP00000267287,…	DIMT1,SIRT1,RTCB,PHF5A,ALKBH1,CSTF1,SETX,BYSL,MPHOSPH10,DHX29,RRP8,ELP3,PRPF38A,TBRG4,UTP6,ACIN1,PPARGC1A,GTF2H1,MBNL2,TXNL4B,SNRPG,ISY1,CCRN4L,RIOK2,CCNL1,SNIP1,UTP15,TRA2A,RP9,KIAA1429,NOL6,PCF11,SF3B3,RNMTL1,DDX19A,ISG20,TUT1,UTP23,PDE12,INTS6,LSM1,TRMT10C,WDR75,PRMT9,PRPF3,PRMT5,LSM10,RPUSD2,ISG20L2,AKAP17A,KARS,FTSJ1,CIRH1A,DHX34,SMAD3,TRMT11,YTHDC1,THUMPD3,RIOK3,PSPC1,CPSF7,PRPF39,PPP4R2,PI…
GO:0070887	cellular response to chemical stimulus	299	2672	0.11	0.00067	9606.ENSP00000064780,9606.ENSP00000158771,9606.ENSP00000166139,9606.ENSP00000171111,9606.ENSP00000179259,9606.ENSP00000209728,9606.ENSP00000212015,9606.ENSP00000215904,9606.ENSP00000216037,9606.ENSP00000216117,9606.ENSP00000216797,9606.ENSP00000220325,9606.ENSP00000220659,9606.ENSP00000220751,9606.ENSP00000221130,9606.ENSP00000222803,9606.ENSP00000222982,9606.ENSP00000223095,9606.ENSP00000224140,…	RELT,DERL2,FSTL3,KEAP1,C12orf5,CDC6,SIRT1,PDXP,XBP1,HMOX1,NFKBIA,EHD4,BRF2,RIPK2,GSR,FKBP14,CYP3A5,SERPINE1,SETX,PPIF,NFKB1,IL10RA,GCLC,HBEGF,DUSP1,EREG,IRF1,TNFSF9,FOSB,NR1D1,SDF2,TICAM1,SDF2L1,LIF,DNAJB9,DLL4,EGLN3,MKNK2,RAF1,MED17,GDF15,JUND,NUMBL,SESN2,AOC2,KDM6B,EIF2S1,MBD2,IRAK2,CMPK2,OASL,RAB11FIP5,RIPK1,THBS1,PREB,MAPK6,WIPI1,PRDX1,C19orf10,MAP3K8,UFD1L,IL1A,BIRC3,ACVR1,MUL1,RAPGEF2,ICAM1…
GO:0043069	negative regulation of programmed cell death	117	873	0.18	0.00072	9606.ENSP00000179259,9606.ENSP00000198767,9606.ENSP00000212015,9606.ENSP00000216037,9606.ENSP00000216117,9606.ENSP00000216489,9606.ENSP00000216797,9606.ENSP00000217958,9606.ENSP00000220751,9606.ENSP00000223095,9606.ENSP00000224140,9606.ENSP00000225174,9606.ENSP00000226574,9606.ENSP00000229416,9606.ENSP00000231668,9606.ENSP00000239223,9606.ENSP00000244050,9606.ENSP00000251849,9606.ENSP00000259808,…	C12orf5,RRN3,SIRT1,XBP1,HMOX1,ALKBH1,NFKBIA,PSMD10,RIPK2,SERPINE1,SETX,PPIF,NFKB1,GCLC,BNIP1,DUSP1,SNAI1,RAF1,RIPK1,IER3,THBS1,CCND2,C19orf10,IL1A,BIRC3,ACVR1,ICAM1,PPARGC1A,GOLPH3,LEF1,UBE2B,PLK2,TNFRSF10B,SLC25A4,SH3RF1,BRAF,MITF,ANXA5,HSP90B1,ANGPTL4,CEBPB,CLCF1,TNFRSF10D,PPARD,CFLAR,DAB2,SPHK1,CLU,EGR3,HSPH1,MALT1,SIAH2,HSPA5,SOCS3,SMAD3,ARHGAP10,CAV1,PLAUR,SFN,CREB3,NR4A2,SUPV3L1,TOPORS,PIM3…
GO:0009628	response to abiotic stimulus	136	1052	0.17	0.00073	9606.ENSP00000179259,9606.ENSP00000212015,9606.ENSP00000216117,9606.ENSP00000216797,9606.ENSP00000221452,9606.ENSP00000226574,9606.ENSP00000229416,9606.ENSP00000230361,9606.ENSP00000234420,9606.ENSP00000239223,9606.ENSP00000245414,9606.ENSP00000245919,9606.ENSP00000250457,9606.ENSP00000250699,9606.ENSP00000251849,9606.ENSP00000252229,9606.ENSP00000252818,9606.ENSP00000256383,9606.ENSP00000256429,…	C12orf5,SIRT1,HMOX1,NFKBIA,RELB,NFKB1,GCLC,GUCA1B,MSH6,DUSP1,IRF1,FOSB,EGLN3,CHRNA10,RAF1,MICB,JUND,EIF2S1,MBD2,BHLHE40,RAB11FIP5,LRRC8A,USP2,THBS1,CCND2,N4BP1,IL1A,MAP4K3,ICAM1,PPARGC1A,UBE2B,EIF2B2,COPS3,SIK1,RHOB,TNFRSF10B,FBXW7,NIPBL,CA2,PPARG,TMEM199,FIGF,AQP3,TSC1,HSP90B1,TRPV3,ANGPTL4,IL12A,CDC25A,PRKCE,PPM1D,EIF2AK3,TBL2,DDIT4,ADAM17,FOSL1,B4GALT2,PPARD,CFLAR,DNAJA2,PER1,METRNL,DCUN1D3,HM…
GO:0034599	cellular response to oxidative stress	42	222	0.33	0.00074	9606.ENSP00000212015,9606.ENSP00000216037,9606.ENSP00000216117,9606.ENSP00000220659,9606.ENSP00000221130,9606.ENSP00000224140,9606.ENSP00000225174,9606.ENSP00000253063,9606.ENSP00000254846,9606.ENSP00000256383,9606.ENSP00000262746,9606.ENSP00000264867,9606.ENSP00000272233,9606.ENSP00000300574,9606.ENSP00000307786,9606.ENSP00000310042,9606.ENSP00000312455,9606.ENSP00000344479,9606.ENSP00000347134,…	SIRT1,XBP1,HMOX1,BRF2,GSR,SETX,PPIF,SESN2,KDM6B,EIF2S1,PRDX1,PPARGC1A,RHOB,CRK,CYCS,ZNF622,CFLAR,NR4A2,NET1,GLRX2,CHUK,JUN,ZC3H12A,ADPRHL2,KLF4,HSPA1B,SRXN1,GPX3,ETS1,SLC11A2,NFE2L2,TRPM2,VIMP,IL18BP,RELA,ARNTL,FOXO3,PNPT1,TXNRD1,ATP2A2,CPEB2,TNFAIP3
GO:0048583	regulation of response to stimulus	414	3882	0.09	0.00076	9606.ENSP00000013125,9606.ENSP00000014914,9606.ENSP00000033079,9606.ENSP00000157600,9606.ENSP00000158771,9606.ENSP00000166139,9606.ENSP00000179259,9606.ENSP00000185150,9606.ENSP00000198767,9606.ENSP00000200453,9606.ENSP00000202556,9606.ENSP00000212015,9606.ENSP00000215631,9606.ENSP00000216037,9606.ENSP00000216117,9606.ENSP00000216373,9606.ENSP00000216489,9606.ENSP00000216797,9606.ENSP00000217958,…	MAP4K5,GPRC5A,FAM13B,LMCD1,DERL2,FSTL3,C12orf5,ERLEC1,RRN3,PPP1R15A,PPP1R13B,SIRT1,GADD45B,XBP1,HMOX1,SOS2,ALKBH1,NFKBIA,PSMD10,RHOV,RIPK2,RELB,SGTA,NAMPT,SERPINE1,PPIF,NFKB1,CYP27B1,CLEC4A,GCLC,MDFI,GUCA1B,HBEGF,DLX2,MSH6,RGS2,DUSP1,ELF1,SNAI1,EREG,IRF1,TNFSF9,PLAGL2,NR1D1,TICAM1,LIF,DNAJB9,DLL4,CHRNA10,RAF1,MICB,GADD45G,SAFB2,GDF15,SESN2,DNAJB1,MBD2,IRAK2,TRAFD1,RINT1,RIPK1,IER3,SDCBP,THBS1,ARH…
GO:0031401	positive regulation of protein modification process	146	1149	0.16	0.00077	9606.ENSP00000013125,9606.ENSP00000200453,9606.ENSP00000209728,9606.ENSP00000212015,9606.ENSP00000215631,9606.ENSP00000216037,9606.ENSP00000217958,9606.ENSP00000220325,9606.ENSP00000220751,9606.ENSP00000230990,9606.ENSP00000244869,9606.ENSP00000248244,9606.ENSP00000249075,9606.ENSP00000251849,9606.ENSP00000252506,9606.ENSP00000252809,9606.ENSP00000256458,9606.ENSP00000259808,9606.ENSP00000260130,…	MAP4K5,PPP1R15A,CDC6,SIRT1,GADD45B,XBP1,PSMD10,EHD4,RIPK2,HBEGF,EREG,TICAM1,LIF,RAF1,GADD45G,GDF15,IRAK2,RIPK1,SDCBP,DCUN1D5,THBS1,CCND2,SEMA7A,MMD,TRAF4,C19orf10,MAP3K8,BIRC3,ACVR1,MAP4K3,CCNT2,MUL1,ALS2,RAPGEF2,DNAJC27,ICAM1,PPARGC1A,MAP3K13,ARRDC3,MAPKAP1,HPX,JDP2,WDR61,ARRDC4,AKAP8,TNFRSF10B,FBXW7,NIPBL,SH3RF1,FLCN,PRKAG2,BRAF,FGF19,TGFA,CCNL1,SENP2,F2RL1,TERF2IP,CRK,IL12A,FNTA,LRP8,ADORA2B,P…
GO:0043085	positive regulation of catalytic activity	170	1381	0.15	0.00077	9606.ENSP00000013125,9606.ENSP00000033079,9606.ENSP00000179259,9606.ENSP00000200453,9606.ENSP00000209728,9606.ENSP00000212015,9606.ENSP00000215631,9606.ENSP00000217958,9606.ENSP00000220751,9606.ENSP00000228606,9606.ENSP00000230361,9606.ENSP00000234420,9606.ENSP00000235382,9606.ENSP00000244869,9606.ENSP00000250457,9606.ENSP00000251849,9606.ENSP00000252506,9606.ENSP00000252809,9606.ENSP00000254322,…	MAP4K5,FAM13B,C12orf5,PPP1R15A,CDC6,SIRT1,GADD45B,PSMD10,RIPK2,CYP27B1,GUCA1B,MSH6,RGS2,EREG,EGLN3,RAF1,GADD45G,GDF15,DNAJB1,IRAK2,AKIRIN2,RIPK1,DCUN1D5,THBS1,ARHGAP29,PREB,CCND2,MMD,TRAF4,MAP3K8,ARFGAP3,MAP4K3,CCNT2,MUL1,ALS2,RASGEF1B,RAPGEF2,ICAM1,MAP3K13,ARRDC3,MAPKAP1,ARRDC4,TNFRSF10B,FBXW7,PPARG,PRKAG2,BRAF,ARHGAP17,TGFA,CCNL1,PCOLCE2,F2RL1,TSC1,CRK,ARAP2,FNTA,LRP8,ADORA2B,PRKCE,EIF2AK3,CYCS…
GO:0030970	retrograde protein transport, ER to cytosol	10	16	0.85	0.00078	9606.ENSP00000158771,9606.ENSP00000261942,9606.ENSP00000263202,9606.ENSP00000299767,9606.ENSP00000331487,9606.ENSP00000351777,9606.ENSP00000366395,9606.ENSP00000381237,9606.ENSP00000381282,9606.ENSP00000409555	DERL2,FAF2,UFD1L,HSP90B1,NPLOC4,VCP,SYVN1,HM13,VIMP,HERPUD1
GO:0001558	regulation of cell growth	64	402	0.26	0.00079	9606.ENSP00000158771,9606.ENSP00000212015,9606.ENSP00000216037,9606.ENSP00000217958,9606.ENSP00000228606,9606.ENSP00000230990,9606.ENSP00000235382,9606.ENSP00000253063,9606.ENSP00000254810,9606.ENSP00000256015,9606.ENSP00000260130,9606.ENSP00000261918,9606.ENSP00000264198,9606.ENSP00000265165,9606.ENSP00000265342,9606.ENSP00000273668,9606.ENSP00000285071,9606.ENSP00000287820,9606.ENSP00000300574,…	DERL2,SIRT1,XBP1,PSMD10,CYP27B1,HBEGF,RGS2,SESN2,H3F3B,BTG1,SDCBP,SEMA7A,MUL1,LEF1,FSTL4,EAF2,FLCN,PPARG,CRK,SLC25A33,ADAM17,PPARD,SPHK1,CRLF3,DCUN1D3,SERTAD3,TNFRSF12A,SMAD3,NDEL1,DNAJB2,SFN,CREB3,NET1,GOLGA4,ADIPOR2,SUPV3L1,MAP2,SMURF1,INO80,OSGIN1,BLZF1,SGK1,CTGF,TSPYL2,HSPA1B,EDN1,CDKL5,TAF9,IGFBP3,SGK3,NEDD4L,BCL6,CDKN1A,SH3BP4,BCAR1,NANOS1,OSGIN2,CYR61,PPP2CA,CDKN2AIP,CRYAB,RPS6KA1,CDK11B,I…
GO:0061136	regulation of proteasomal protein catabolic process	37	185	0.36	0.00079	9606.ENSP00000157812,9606.ENSP00000158771,9606.ENSP00000171111,9606.ENSP00000185150,9606.ENSP00000216037,9606.ENSP00000217958,9606.ENSP00000221566,9606.ENSP00000229416,9606.ENSP00000260130,9606.ENSP00000262384,9606.ENSP00000274289,9606.ENSP00000281708,9606.ENSP00000287437,9606.ENSP00000312150,9606.ENSP00000313391,9606.ENSP00000314619,9606.ENSP00000315130,9606.ENSP00000321239,9606.ENSP00000326095,…	PSMC4,DERL2,KEAP1,ERLEC1,XBP1,PSMD10,SGTA,GCLC,SDCBP,N4BP1,PLK2,FBXW7,NSMCE2,TRIB1,DAB2,ZFAND2A,CLU,RCHY1,RNF166,YOD1,DNAJB2,CAV1,VCP,DDA1,BTRC,LONRF3,PLK3,RNF19B,TAF9,NFE2L2,LONRF1,TMF1,USP25,HERPUD1,RYBP,SH3RF2,UBE2J1
GO:0043902	positive regulation of multi-organism process	63	394	0.26	0.00081	9606.ENSP00000216797,9606.ENSP00000217402,9606.ENSP00000220751,9606.ENSP00000221452,9606.ENSP00000226574,9606.ENSP00000229332,9606.ENSP00000244869,9606.ENSP00000248244,9606.ENSP00000251849,9606.ENSP00000256458,9606.ENSP00000259808,9606.ENSP00000262039,9606.ENSP00000262510,9606.ENSP00000263847,9606.ENSP00000265165,9606.ENSP00000265983,9606.ENSP00000267202,9606.ENSP00000284551,9606.ENSP00000296091,…	NFKBIA,CHMP4B,RIPK2,RELB,NFKB1,CLEC4A,EREG,TICAM1,RAF1,IRAK2,RIPK1,PIK3C3,NLRC5,OSBP,LEF1,HPX,VPS37B,TRIM11,ZNF502,F2RL1,HSP90B1,PPIB,IL12A,PRKCE,PDE12,MALT1,P4HB,POLR3C,CAV1,RIOK3,PSPC1,TBC1D20,TRIM38,ANKRD17,PELI1,ADARB1,TAF11,CHUK,BCL10,JUN,PTAFR,HSPA1B,OPTN,DDX58,TRIM5,RSAD2,AP1G1,POLR3D,POLR3G,RELA,TLR6,CYLD,PVR,MUC20,MUC4,TRAF6,UBC,TRAF3,RPS6KA5,ITCH,TNFAIP3,IKBKG,MUC5AC
GO:1903050	regulation of proteolysis involved in cellular protein catabolic process	41	216	0.34	0.00082	9606.ENSP00000157812,9606.ENSP00000158771,9606.ENSP00000171111,9606.ENSP00000185150,9606.ENSP00000216037,9606.ENSP00000217958,9606.ENSP00000221566,9606.ENSP00000229416,9606.ENSP00000260130,9606.ENSP00000262384,9606.ENSP00000274289,9606.ENSP00000281708,9606.ENSP00000287437,9606.ENSP00000304051,9606.ENSP00000312150,9606.ENSP00000313391,9606.ENSP00000314619,9606.ENSP00000315130,9606.ENSP00000321239,…	PSMC4,DERL2,KEAP1,ERLEC1,XBP1,PSMD10,SGTA,GCLC,SDCBP,N4BP1,PLK2,FBXW7,NSMCE2,RNF139,TRIB1,DAB2,ZFAND2A,CLU,RCHY1,RNF166,YOD1,DNAJB2,CAV1,VCP,DDA1,SMURF1,EFNA1,BTRC,LONRF3,PLK3,RNF19B,TRIM39,TAF9,NFE2L2,LONRF1,TMF1,USP25,HERPUD1,RYBP,SH3RF2,UBE2J1
GO:0043066	negative regulation of apoptotic process	115	859	0.18	0.00083	9606.ENSP00000198767,9606.ENSP00000212015,9606.ENSP00000216037,9606.ENSP00000216117,9606.ENSP00000216489,9606.ENSP00000216797,9606.ENSP00000217958,9606.ENSP00000220751,9606.ENSP00000223095,9606.ENSP00000224140,9606.ENSP00000225174,9606.ENSP00000226574,9606.ENSP00000229416,9606.ENSP00000231668,9606.ENSP00000239223,9606.ENSP00000244050,9606.ENSP00000251849,9606.ENSP00000259808,9606.ENSP00000259874,…	RRN3,SIRT1,XBP1,HMOX1,ALKBH1,NFKBIA,PSMD10,RIPK2,SERPINE1,SETX,PPIF,NFKB1,GCLC,BNIP1,DUSP1,SNAI1,RAF1,RIPK1,IER3,THBS1,CCND2,C19orf10,IL1A,BIRC3,ACVR1,ICAM1,PPARGC1A,GOLPH3,LEF1,UBE2B,PLK2,TNFRSF10B,SH3RF1,BRAF,MITF,ANXA5,HSP90B1,ANGPTL4,CEBPB,CLCF1,TNFRSF10D,PPARD,CFLAR,DAB2,SPHK1,CLU,EGR3,HSPH1,MALT1,SIAH2,HSPA5,SOCS3,SMAD3,ARHGAP10,CAV1,PLAUR,SFN,CREB3,NR4A2,SUPV3L1,TOPORS,PIM3,NAA35,DYRK3,NUA…
GO:0045934	negative regulation of nucleobase-containing compound metabolic process	174	1424	0.14	0.00085	9606.ENSP00000157600,9606.ENSP00000179259,9606.ENSP00000209728,9606.ENSP00000212015,9606.ENSP00000216037,9606.ENSP00000217958,9606.ENSP00000221452,9606.ENSP00000222329,9606.ENSP00000225174,9606.ENSP00000225688,9606.ENSP00000226574,9606.ENSP00000229416,9606.ENSP00000230321,9606.ENSP00000234198,9606.ENSP00000234420,9606.ENSP00000239223,9606.ENSP00000242728,9606.ENSP00000244050,9606.ENSP00000244869,…	LMCD1,C12orf5,CDC6,SIRT1,XBP1,PSMD10,RELB,ERF,PPIF,RASD1,NFKB1,GCLC,MDFI,DLX2,MSH6,DUSP1,BHLHE41,SNAI1,EREG,IRF1,FOSB,NR1D1,DLL4,EAPP,JUND,THAP1,DNAJB1,RRP8,H3F3B,MBD2,BHLHE40,BACH2,AKIRIN2,USP2,TRIM37,ACIN1,EPC1,MXD1,PPARGC1A,LEF1,UBE2B,CREM,BTAF1,JDP2,CCRN4L,FBXW7,NIPBL,TRIM11,FLCN,PPARG,ZNF281,REL,MITF,NFIL3,TERF2IP,RUNX1,LRP8,CEBPB,PPM1D,DONSON,DDIT4,ZBTB5,ZNF608,ZNF239,MEPCE,ZNF431,PDE12,NR1…
GO:0006914	autophagy	44	240	0.32	0.00086	9606.ENSP00000179259,9606.ENSP00000216037,9606.ENSP00000217402,9606.ENSP00000220509,9606.ENSP00000231668,9606.ENSP00000237642,9606.ENSP00000254101,9606.ENSP00000262039,9606.ENSP00000262139,9606.ENSP00000264867,9606.ENSP00000266458,9606.ENSP00000267202,9606.ENSP00000269221,9606.ENSP00000269228,9606.ENSP00000277746,9606.ENSP00000287878,9606.ENSP00000296343,9606.ENSP00000301765,9606.ENSP00000304376,…	C12orf5,XBP1,CHMP4B,VPS18,BNIP1,STBD1,PRKAB2,PIK3C3,WIPI1,PPARGC1A,GABARAPL1,VPS37B,C18orf8,NPC1,NRBF2,PRKAG2,KIAA0226,VPS37C,RAB24,TMEM208,TOLLIP,CLU,VPS37A,YOD1,RAB12,HSP90AA1,ATG101,RNF41,UVRAG,VCP,SMURF1,ATG4A,C6orf106,TP53INP2,TBC1D25,STAM,OPTN,TRIM5,SQSTM1,ATG16L1,PLEKHM1,SUPT20H,CLTC,C9orf72
GO:0048194	Golgi vesicle budding	21	75	0.5	0.00086	9606.ENSP00000222547,9606.ENSP00000260643,9606.ENSP00000262225,9606.ENSP00000265070,9606.ENSP00000280551,9606.ENSP00000291574,9606.ENSP00000294179,9606.ENSP00000295400,9606.ENSP00000325827,9606.ENSP00000330945,9606.ENSP00000338844,9606.ENSP00000346139,9606.ENSP00000358071,9606.ENSP00000362339,9606.ENSP00000378721,9606.ENSP00000381823,9606.ENSP00000385432,9606.ENSP00000386651,9606.ENSP00000390783,…	BET1,PREB,TMED2,GOLPH3,SEC24D,TRAPPC10,STX5,TGFA,SEC16A,TMED9,SEC23B,TBC1D20,SEC23IP,SAR1A,SEC31A,SEC24A,SAR1B,MCFD2,SCFD1,USO1,TRAPPC3
GO:0010256	endomembrane system organization	56	337	0.28	0.00087	9606.ENSP00000163416,9606.ENSP00000217402,9606.ENSP00000220509,9606.ENSP00000221566,9606.ENSP00000223500,9606.ENSP00000231668,9606.ENSP00000234160,9606.ENSP00000237264,9606.ENSP00000258654,9606.ENSP00000259339,9606.ENSP00000262039,9606.ENSP00000262225,9606.ENSP00000264276,9606.ENSP00000265070,9606.ENSP00000265857,9606.ENSP00000267202,9606.ENSP00000267622,9606.ENSP00000286760,9606.ENSP00000294179,…	GOLGA5,CHMP4B,VPS18,SGTA,CHMP5,BNIP1,GORASP2,TBPL1,COG3,TOR1B,PIK3C3,TMED2,ALS2,GOLPH3,GET4,VPS37B,TRIP11,WHAMM,STX5,VPS37C,EIF2AK3,ATP8B3,CLU,VPS37A,PRMT5,SEC16A,TMED9,NPLOC4,NDEL1,CAV1,TBC1D20,EXOC8,BLZF1,SEC23IP,TMED5,BLOC1S2,PI4K2A,STX16,SURF4,PLK3,TJAP1,STAM,OPTN,LYST,SQSTM1,GOLGB1,USP8,TMF1,AGFG1,CREB1,BLOC1S3,LPIN1,RAB30,ATP2A2,USO1,BHLHA15
GO:0002684	positive regulation of immune system process	117	882	0.18	0.00098	9606.ENSP00000212015,9606.ENSP00000216037,9606.ENSP00000216117,9606.ENSP00000216797,9606.ENSP00000220751,9606.ENSP00000221452,9606.ENSP00000223095,9606.ENSP00000226574,9606.ENSP00000229332,9606.ENSP00000234420,9606.ENSP00000244869,9606.ENSP00000245817,9606.ENSP00000248244,9606.ENSP00000249075,9606.ENSP00000251849,9606.ENSP00000252229,9606.ENSP00000256458,9606.ENSP00000259808,9606.ENSP00000260356,…	SIRT1,XBP1,HMOX1,NFKBIA,RIPK2,RELB,SERPINE1,NFKB1,CLEC4A,MSH6,EREG,TNFSF9,TICAM1,LIF,RAF1,MICB,IRAK2,RIPK1,THBS1,SEMA7A,PIK3C3,NLRC5,VAMP7,ACIN1,MAP3K8,IL1A,ICAM1,LEF1,HPX,EIF2B2,CA2,CXCL3,CXCL5,F2RL1,FIGF,AQP3,HSP90B1,RUNX1,CRK,IL12A,ADORA2B,PRKCE,CXCL8,CLCF1,ADAM17,TRIB1,CLU,EGR3,HSPH1,MALT1,CALR,ZNF335,KARS,NFKBIZ,CSF1,PDE4B,POLR3C,HSP90AA1,CAV1,RIOK3,CREB3,PSPC1,ANKRD17,PELI1,P2RX4,DUSP10,IL6…
GO:0045862	positive regulation of proteolysis	57	347	0.27	0.00098	9606.ENSP00000157812,9606.ENSP00000171111,9606.ENSP00000212015,9606.ENSP00000216037,9606.ENSP00000217958,9606.ENSP00000220751,9606.ENSP00000221566,9606.ENSP00000229416,9606.ENSP00000250457,9606.ENSP00000257787,9606.ENSP00000259808,9606.ENSP00000264198,9606.ENSP00000274289,9606.ENSP00000276431,9606.ENSP00000281708,9606.ENSP00000287437,9606.ENSP00000287820,9606.ENSP00000295992,9606.ENSP00000304051,…	PSMC4,KEAP1,SIRT1,XBP1,PSMD10,RIPK2,SGTA,GCLC,EGLN3,AKIRIN2,RIPK1,MUL1,PLK2,TNFRSF10B,FBXW7,NSMCE2,PPARG,PCOLCE2,RNF139,EIF2AK3,CYCS,TRIB1,CFLAR,DAB2,ZFAND2A,CLU,RCHY1,KARS,RNF166,PMAIP1,SMAD3,DNAJB2,CAV1,NRD1,VCP,SMURF1,CTGF,EFNA1,BTRC,BCL10,LONRF3,PLK3,ZC3H12A,RNF19B,MTCH1,BAK1,XDH,NKX3-1,SLC11A2,NFE2L2,MBP,LONRF1,PSME4,DIABLO,CYR61,HERPUD1,BCL2L13
GO:0007249	I-kappaB kinase/NF-kappaB signaling	20	70	0.51	0.001	9606.ENSP00000216797,9606.ENSP00000220751,9606.ENSP00000221452,9606.ENSP00000226574,9606.ENSP00000248244,9606.ENSP00000256458,9606.ENSP00000259808,9606.ENSP00000263464,9606.ENSP00000295025,9606.ENSP00000296215,9606.ENSP00000354911,9606.ENSP00000358983,9606.ENSP00000359424,9606.ENSP00000359612,9606.ENSP00000393785,9606.ENSP00000433623,9606.ENSP00000441543,9606.ENSP00000477613,9606.ENSP00000482657,…	NFKBIA,RIPK2,RELB,NFKB1,TICAM1,IRAK2,RIPK1,BIRC3,REL,SNIP1,TIFA,NFKB2,CHUK,BCL10,NKIRAS1,TRAF6,UBC,BIRC2,MAP3K14,IKBKG
GO:0023051	regulation of signaling	363	3360	0.09	0.001	9606.ENSP00000013125,9606.ENSP00000014914,9606.ENSP00000033079,9606.ENSP00000157600,9606.ENSP00000166139,9606.ENSP00000198767,9606.ENSP00000200453,9606.ENSP00000202556,9606.ENSP00000212015,9606.ENSP00000215631,9606.ENSP00000216037,9606.ENSP00000216117,9606.ENSP00000216373,9606.ENSP00000216489,9606.ENSP00000216797,9606.ENSP00000217958,9606.ENSP00000220507,9606.ENSP00000220751,9606.ENSP00000222553,…	MAP4K5,GPRC5A,FAM13B,LMCD1,FSTL3,RRN3,PPP1R15A,PPP1R13B,SIRT1,GADD45B,XBP1,HMOX1,SOS2,ALKBH1,NFKBIA,PSMD10,RHOV,RIPK2,NAMPT,SERPINE1,CHMP5,PPIF,NFKB1,CYP27B1,GCLC,MDFI,GUCA1B,HBEGF,DLX2,RGS2,DUSP1,ELF1,SNAI1,EREG,IRF1,TNFSF9,PLAGL2,NR1D1,TICAM1,LIF,DNAJB9,DLL4,CHRNA10,RAF1,GADD45G,SAFB2,GDF15,SESN2,MBD2,IRAK2,RINT1,RAB11FIP5,RIPK1,IER3,SDCBP,THBS1,ARHGAP29,SEMA7A,TRAF4,NLRC5,VAMP7,PRDX1,C19orf10,…
GO:0034097	response to cytokine	133	1035	0.17	0.001	9606.ENSP00000064780,9606.ENSP00000171111,9606.ENSP00000212015,9606.ENSP00000216037,9606.ENSP00000216117,9606.ENSP00000216797,9606.ENSP00000220751,9606.ENSP00000221452,9606.ENSP00000226574,9606.ENSP00000227752,9606.ENSP00000228606,9606.ENSP00000229416,9606.ENSP00000244869,9606.ENSP00000245414,9606.ENSP00000245817,9606.ENSP00000249075,9606.ENSP00000252818,9606.ENSP00000252891,9606.ENSP00000256458,…	RELT,KEAP1,SIRT1,XBP1,HMOX1,NFKBIA,RIPK2,RELB,NFKB1,IL10RA,CYP27B1,GCLC,EREG,IRF1,TNFSF9,LIF,JUND,NUMBL,IRAK2,OASL,TRAFD1,RIPK1,THBS1,MAP3K8,IL1A,BIRC3,MAP4K3,ICAM1,PPARGC1A,LEF1,PTPN23,TNFRSF10B,BATF,IFNGR2,REL,PCOLCE2,CXCL3,CXCL5,NFIL3,HSP90B1,CRK,IL12A,LRP8,CEBPB,B3GNT2,CXCL8,ISG20,PDE12,CLCF1,ADAM17,FOSL1,TNFRSF10D,TOLLIP,MMP1,HSPA5,KARS,TNFRSF12A,CSF1,P4HB,IFNLR1,SOCS3,RAB12,SMAD3,MX2,HSP90A…
GO:0009057	macromolecule catabolic process	126	970	0.17	0.0011	9606.ENSP00000157812,9606.ENSP00000158771,9606.ENSP00000171111,9606.ENSP00000185150,9606.ENSP00000212015,9606.ENSP00000216037,9606.ENSP00000217402,9606.ENSP00000219313,9606.ENSP00000221566,9606.ENSP00000237455,9606.ENSP00000237642,9606.ENSP00000242719,9606.ENSP00000246672,9606.ENSP00000247020,9606.ENSP00000247977,9606.ENSP00000248958,9606.ENSP00000249356,9606.ENSP00000256257,9606.ENSP00000259808,…	PSMC4,DERL2,KEAP1,ERLEC1,SIRT1,XBP1,CHMP4B,PSMD7,SGTA,RNF103,STBD1,RNF11,NR1D1,SDF2,FBXL12,SDF2L1,DNAJB9,RNF122,RIPK1,USP2,PSMD11,FAF2,UFD1L,PSMD3,UBE2B,PTPN23,GET4,WDR61,COPS3,RNF7,PELO,USP15,CCRN4L,FBXW7,USP12,TMEM199,UBAP1,HSP90B1,KCTD5,RNF139,ISG20,RNF181,PDE12,FBXO45,LSM1,KCTD2,KLHL11,ZHX2,TOLLIP,CLU,VPS37A,EDC3,RCHY1,SIAH2,HSPA5,PPP2R2A,PMAIP1,YOD1,CLN8,NPLOC4,RAB12,DHX34,HSP90AA1,KLHL25,PN…
GO:0010646	regulation of cell communication	359	3327	0.09	0.0012	9606.ENSP00000013125,9606.ENSP00000014914,9606.ENSP00000033079,9606.ENSP00000157600,9606.ENSP00000166139,9606.ENSP00000198767,9606.ENSP00000200453,9606.ENSP00000202556,9606.ENSP00000212015,9606.ENSP00000215631,9606.ENSP00000216037,9606.ENSP00000216117,9606.ENSP00000216373,9606.ENSP00000216489,9606.ENSP00000216797,9606.ENSP00000217958,9606.ENSP00000220507,9606.ENSP00000220751,9606.ENSP00000222553,…	MAP4K5,GPRC5A,FAM13B,LMCD1,FSTL3,RRN3,PPP1R15A,PPP1R13B,SIRT1,GADD45B,XBP1,HMOX1,SOS2,ALKBH1,NFKBIA,PSMD10,RHOV,RIPK2,NAMPT,SERPINE1,PPIF,NFKB1,CYP27B1,GCLC,MDFI,GUCA1B,HBEGF,DLX2,RGS2,DUSP1,ELF1,SNAI1,EREG,IRF1,TNFSF9,PLAGL2,NR1D1,TICAM1,LIF,DNAJB9,DLL4,CHRNA10,RAF1,GADD45G,SAFB2,GDF15,SESN2,MBD2,IRAK2,RINT1,RAB11FIP5,RIPK1,IER3,SDCBP,THBS1,ARHGAP29,SEMA7A,TRAF4,NLRC5,VAMP7,PRDX1,C19orf10,MAP3K8…
GO:1903507	negative regulation of nucleic acid-templated transcription	152	1220	0.15	0.0012	9606.ENSP00000157600,9606.ENSP00000212015,9606.ENSP00000216037,9606.ENSP00000217958,9606.ENSP00000221452,9606.ENSP00000222329,9606.ENSP00000225688,9606.ENSP00000226574,9606.ENSP00000229416,9606.ENSP00000230321,9606.ENSP00000234198,9606.ENSP00000242728,9606.ENSP00000244050,9606.ENSP00000244869,9606.ENSP00000245414,9606.ENSP00000245919,9606.ENSP00000246672,9606.ENSP00000249749,9606.ENSP00000250454,…	LMCD1,SIRT1,XBP1,PSMD10,RELB,ERF,RASD1,NFKB1,GCLC,MDFI,DLX2,BHLHE41,SNAI1,EREG,IRF1,FOSB,NR1D1,DLL4,EAPP,JUND,THAP1,DNAJB1,RRP8,H3F3B,MBD2,BHLHE40,BACH2,AKIRIN2,USP2,TRIM37,EPC1,MXD1,LEF1,UBE2B,CREM,BTAF1,JDP2,NIPBL,TRIM11,FLCN,PPARG,ZNF281,REL,MITF,NFIL3,RUNX1,LRP8,CEBPB,PPM1D,ZBTB5,ZNF608,ZNF239,MEPCE,ZNF431,NR1D2,PPARD,DAB2,PER1,ZHX2,PRMT5,CALR,SIAH2,ZNF354B,YAF2,SMAD3,ZNF354A,ZNF202,OVOL1,GZF…
GO:0071310	cellular response to organic substance	252	2219	0.11	0.0013	9606.ENSP00000064780,9606.ENSP00000158771,9606.ENSP00000171111,9606.ENSP00000209728,9606.ENSP00000212015,9606.ENSP00000215904,9606.ENSP00000216037,9606.ENSP00000216117,9606.ENSP00000216797,9606.ENSP00000220325,9606.ENSP00000220751,9606.ENSP00000222803,9606.ENSP00000223095,9606.ENSP00000224140,9606.ENSP00000226574,9606.ENSP00000227752,9606.ENSP00000229416,9606.ENSP00000239223,9606.ENSP00000244869,…	RELT,DERL2,KEAP1,CDC6,SIRT1,PDXP,XBP1,HMOX1,NFKBIA,EHD4,RIPK2,FKBP14,SERPINE1,SETX,NFKB1,IL10RA,GCLC,DUSP1,EREG,IRF1,TNFSF9,FOSB,NR1D1,SDF2,TICAM1,SDF2L1,LIF,DNAJB9,DLL4,RAF1,MED17,GDF15,JUND,NUMBL,SESN2,EIF2S1,MBD2,IRAK2,CMPK2,OASL,RAB11FIP5,RIPK1,THBS1,PREB,MAPK6,WIPI1,C19orf10,MAP3K8,UFD1L,IL1A,BIRC3,ACVR1,MUL1,RAPGEF2,ICAM1,PPARGC1A,LEF1,PTPN23,NPC1,AKAP8,SIK1,TNFRSF10B,USP15,CA2,BATF,PPARG,I…
GO:2000060	positive regulation of ubiquitin-dependent protein catabolic process	25	104	0.44	0.0013	9606.ENSP00000171111,9606.ENSP00000216037,9606.ENSP00000217958,9606.ENSP00000221566,9606.ENSP00000229416,9606.ENSP00000274289,9606.ENSP00000281708,9606.ENSP00000287437,9606.ENSP00000304051,9606.ENSP00000312150,9606.ENSP00000313391,9606.ENSP00000314619,9606.ENSP00000315130,9606.ENSP00000321239,9606.ENSP00000326095,9606.ENSP00000338019,9606.ENSP00000339191,9606.ENSP00000351777,9606.ENSP00000354621,…	KEAP1,XBP1,PSMD10,SGTA,GCLC,PLK2,FBXW7,NSMCE2,RNF139,TRIB1,DAB2,ZFAND2A,CLU,RCHY1,RNF166,DNAJB2,CAV1,VCP,SMURF1,LONRF3,PLK3,RNF19B,NFE2L2,LONRF1,HERPUD1
GO:0031396	regulation of protein ubiquitination	37	192	0.34	0.0014	9606.ENSP00000217958,9606.ENSP00000220751,9606.ENSP00000229416,9606.ENSP00000248244,9606.ENSP00000260247,9606.ENSP00000262384,9606.ENSP00000263464,9606.ENSP00000265138,9606.ENSP00000268042,9606.ENSP00000281708,9606.ENSP00000296257,9606.ENSP00000304051,9606.ENSP00000306124,9606.ENSP00000313681,9606.ENSP00000318966,9606.ENSP00000319279,9606.ENSP00000319482,9606.ENSP00000321239,9606.ENSP00000322457,…	PSMD10,RIPK2,GCLC,TICAM1,DCUN1D5,N4BP1,BIRC3,ARRDC3,ARRDC4,FBXW7,SENP2,RNF139,PRKCE,SPHK1,PINX1,MALT1,DCUN1D3,RCHY1,SIAH2,HSPA5,HSP90AA1,DNAJB2,CAV1,RASSF1,PELI1,TOPORS,CTR9,BCL10,HSPA1B,ISG15,GPS2,HERPUD1,DCUN1D2,UBR5,TRAF6,BIRC2,TNFAIP3
GO:0051128	regulation of cellular component organization	260	2306	0.11	0.0014	9606.ENSP00000157812,9606.ENSP00000158771,9606.ENSP00000179259,9606.ENSP00000198767,9606.ENSP00000200453,9606.ENSP00000202556,9606.ENSP00000209728,9606.ENSP00000212015,9606.ENSP00000215904,9606.ENSP00000216037,9606.ENSP00000217402,9606.ENSP00000217958,9606.ENSP00000220325,9606.ENSP00000220509,9606.ENSP00000223095,9606.ENSP00000223500,9606.ENSP00000224140,9606.ENSP00000225174,9606.ENSP00000227752,…	PSMC4,DERL2,C12orf5,RRN3,PPP1R15A,PPP1R13B,CDC6,SIRT1,PDXP,XBP1,CHMP4B,PSMD10,EHD4,VPS18,SERPINE1,CHMP5,SETX,PPIF,IL10RA,CYP27B1,HBEGF,RGS2,ATAD2B,DUSP1,SNAI1,EREG,LIF,STRIP2,RAF1,GDF15,CEP85,SESN2,DNAJB1,H3F3B,ACTR3B,BTG1,SDCBP,THBS1,PREB,MAPK6,SEMA7A,TRIM37,VAMP7,IL1A,LCAT,MUL1,PIKFYVE,RAPGEF2,ICAM1,PPARGC1A,GOLPH3,LEF1,UBE2B,FSTL4,PTPN23,GTF2H1,JDP2,WDR61,AKAP8,DYNC1LI1,EAF2,PLK2,TJP1,FBXW7,TR…
GO:0045892	negative regulation of transcription, DNA-templated	146	1169	0.15	0.0015	9606.ENSP00000157600,9606.ENSP00000212015,9606.ENSP00000216037,9606.ENSP00000217958,9606.ENSP00000221452,9606.ENSP00000222329,9606.ENSP00000225688,9606.ENSP00000226574,9606.ENSP00000229416,9606.ENSP00000230321,9606.ENSP00000234198,9606.ENSP00000242728,9606.ENSP00000244050,9606.ENSP00000244869,9606.ENSP00000245414,9606.ENSP00000245919,9606.ENSP00000246672,9606.ENSP00000249749,9606.ENSP00000250454,…	LMCD1,SIRT1,XBP1,PSMD10,RELB,ERF,RASD1,NFKB1,GCLC,MDFI,DLX2,BHLHE41,SNAI1,EREG,IRF1,FOSB,NR1D1,DLL4,EAPP,JUND,THAP1,DNAJB1,RRP8,H3F3B,MBD2,BHLHE40,BACH2,AKIRIN2,USP2,TRIM37,EPC1,MXD1,LEF1,UBE2B,CREM,BTAF1,JDP2,NIPBL,TRIM11,FLCN,PPARG,ZNF281,REL,MITF,NFIL3,RUNX1,LRP8,CEBPB,PPM1D,ZBTB5,ZNF608,ZNF239,MEPCE,ZNF431,NR1D2,PPARD,DAB2,PER1,ZHX2,CALR,ZNF354B,YAF2,SMAD3,ZNF354A,ZNF202,OVOL1,GZF1,CAV1,HIST1…
GO:2001233	regulation of apoptotic signaling pathway	61	388	0.25	0.0015	9606.ENSP00000198767,9606.ENSP00000202556,9606.ENSP00000212015,9606.ENSP00000216037,9606.ENSP00000216117,9606.ENSP00000217958,9606.ENSP00000223095,9606.ENSP00000225174,9606.ENSP00000229416,9606.ENSP00000244050,9606.ENSP00000246229,9606.ENSP00000251849,9606.ENSP00000259808,9606.ENSP00000260356,9606.ENSP00000263339,9606.ENSP00000263640,9606.ENSP00000264198,9606.ENSP00000264832,9606.ENSP00000276431,…	RRN3,PPP1R13B,SIRT1,XBP1,HMOX1,PSMD10,SERPINE1,PPIF,GCLC,SNAI1,PLAGL2,RAF1,RIPK1,THBS1,IL1A,ACVR1,MUL1,ICAM1,TNFRSF10B,FBXW7,SH3RF1,YWHAG,EIF2AK3,CFLAR,CLU,HSPH1,SIAH2,PMAIP1,TNFRSF12A,P4HB,SMAD3,CAV1,PLAUR,SFN,CREB3,ATF3,NR4A2,PEA15,MCL1,GCLM,BCL10,PTPN1,BAK1,HSPA1B,TRIM39,SYVN1,TAF9,NKX3-1,SGK3,NFE2L2,VIMP,RELA,CYLD,HERPUD1,SKIL,NCK1,DAPK3,DDIT3,BDKRB2,DEDD2,TNFAIP3
GO:0031347	regulation of defense response	93	676	0.2	0.0019	9606.ENSP00000216797,9606.ENSP00000220751,9606.ENSP00000221452,9606.ENSP00000223095,9606.ENSP00000226574,9606.ENSP00000229332,9606.ENSP00000244869,9606.ENSP00000245414,9606.ENSP00000246672,9606.ENSP00000248244,9606.ENSP00000251849,9606.ENSP00000252229,9606.ENSP00000256458,9606.ENSP00000257604,9606.ENSP00000259808,9606.ENSP00000261918,9606.ENSP00000262039,9606.ENSP00000262510,9606.ENSP00000262640,…	NFKBIA,RIPK2,RELB,SERPINE1,NFKB1,CLEC4A,EREG,IRF1,NR1D1,TICAM1,RAF1,MICB,IRAK2,TRAFD1,RIPK1,SEMA7A,PIK3C3,NLRC5,VAMP7,UFD1L,BIRC3,MUL1,MGLL,HPX,PPARG,IFNGR2,F2RL1,HSP90B1,CRK,IL12A,ADORA2B,PRKCE,NR1D2,PPARD,PER1,CLU,METRNL,MALT1,KARS,IFNLR1,SOCS3,NPLOC4,SMAD3,POLR3C,CAV1,RIOK3,CREB3,MCPH1,PSPC1,TRIM38,ANKRD17,PELI1,GPATCH3,DUSP10,IFNGR1,CHUK,BCL10,PTPN1,ZC3H12A,PTAFR,KLF4,HSPA1B,OPTN,DDX58,TRIM5,…
GO:0048199	vesicle targeting, to, from or within Golgi	19	68	0.5	0.0019	9606.ENSP00000222547,9606.ENSP00000260643,9606.ENSP00000262139,9606.ENSP00000262225,9606.ENSP00000280551,9606.ENSP00000291574,9606.ENSP00000294179,9606.ENSP00000295400,9606.ENSP00000325827,9606.ENSP00000330945,9606.ENSP00000346139,9606.ENSP00000358071,9606.ENSP00000378721,9606.ENSP00000381823,9606.ENSP00000385432,9606.ENSP00000386651,9606.ENSP00000390783,9606.ENSP00000444850,9606.ENSP00000480332	BET1,PREB,WIPI1,TMED2,SEC24D,TRAPPC10,STX5,TGFA,SEC16A,TMED9,TBC1D20,SEC23IP,SEC31A,SEC24A,SAR1B,MCFD2,SCFD1,USO1,TRAPPC3
GO:0051253	negative regulation of RNA metabolic process	159	1303	0.14	0.0019	9606.ENSP00000157600,9606.ENSP00000212015,9606.ENSP00000216037,9606.ENSP00000217958,9606.ENSP00000221452,9606.ENSP00000222329,9606.ENSP00000225688,9606.ENSP00000226574,9606.ENSP00000229416,9606.ENSP00000230321,9606.ENSP00000234198,9606.ENSP00000242728,9606.ENSP00000244050,9606.ENSP00000244869,9606.ENSP00000245414,9606.ENSP00000245919,9606.ENSP00000246672,9606.ENSP00000249749,9606.ENSP00000250454,…	LMCD1,SIRT1,XBP1,PSMD10,RELB,ERF,RASD1,NFKB1,GCLC,MDFI,DLX2,BHLHE41,SNAI1,EREG,IRF1,FOSB,NR1D1,DLL4,EAPP,JUND,THAP1,DNAJB1,RRP8,H3F3B,MBD2,BHLHE40,BACH2,AKIRIN2,USP2,TRIM37,ACIN1,EPC1,MXD1,LEF1,UBE2B,CREM,BTAF1,JDP2,CCRN4L,NIPBL,TRIM11,FLCN,PPARG,ZNF281,REL,MITF,NFIL3,RUNX1,LRP8,CEBPB,PPM1D,ZBTB5,ZNF608,ZNF239,MEPCE,ZNF431,NR1D2,PPARD,DAB2,PER1,ZHX2,PRMT5,CALR,SIAH2,ZNF354B,YAF2,DHX34,SMAD3,ZNF35…
[truncated: 192 more rows]

## Sheet: Par_vs_Coinfection_72_Down_Bio_
Supplementary table S10: Results from the Gene Ontology (GO) analysis in the category for biological process complete (GObp) and Pathway Enrichment (KEGG pathways) from single infections compared to co-infected cells at both 24 and 72 hpi.
#term ID	term description	observed gene count	background gene count	strength	false discovery rate	matching proteins in your network (IDs)	matching proteins in your network (labels)
[truncated: 245 more rows]

[truncated: 6 more sheets: Par_vs_Coinfection_72_up_KEGG, Par_vs_Coinfection_72_Down_KEGG, Vir_vs_Coinfection_72_up_Bio_PW, Vir_vs_Coinfection_72_Down_Bio, Vir_vs_Coinfection_72_Up_KEGG, Vir_vs_Coinfection_72_Down_KEGG]
