# Supplementary material for: Gene expression profile of HCT-8 cells following single or co-infections with Cryptosporidium parvum and bovine coronavirus
Source: Research Square preprint supplement (doi:10.21203/rs.3.rs-2673942/v1), 2023-03-23
Supplement: Supplementary file 9 [file c1ca8ec8d393a3e239d66eb5.xlsx]

## Sheet: BCoV infected cells 24 hpi
Supplementary table 1: Differentially expressed genes (DEGs) mapped to Homo sapiens in HCT-8 cells infected with BCoV, C. parvum or both agents at both 24 and 72 hpi. Positive fold-change values indicate gene upregulation in infected HCT-8 cells.
gene	gene_id	locus	sample_1	sample_2	status	value_1	value_2	log2_FC	Fold change (FC)	test_stat	p_value	q_value	significant
ANKRD1	ENSG00000148677	10:92671852-92681033	con24	vir24	OK	0.348031	12.0775	5.11696	34.7023	8.42808	5e-05	0.000280515	yes
IL8	ENSG00000169429	4:74606222-74609433	con24	vir24	OK	0.878509	12.2583	3.80256	13.9535	4.95623	5e-05	0.000280515	yes
IL1A	ENSG00000115008	2:113531491-113542167	con24	vir24	OK	0.249645	3.03224	3.60243	12.1462	4.97293	5e-05	0.000280515	yes
CXCL2	ENSG00000081041	4:74962751-74965010	con24	vir24	OK	0.442863	3.56354	3.00838	8.0466	3.21901	5e-05	0.000280515	yes
ATF3	ENSG00000162772	1:212738675-212794119	con24	vir24	OK	2.26391	17.1417	2.92062	7.57171	5.67179	5e-05	0.000280515	yes
RP11-383J24.1	ENSG00000253227	8:125283923-125289825	con24	vir24	OK	0.250253	1.66494	2.73401	6.65302	1.88402	0.002	0.00828258	yes
DUSP1	ENSG00000120129	5:172185228-172204777	con24	vir24	OK	1.6343	8.02993	2.29671	4.91336	4.49535	5e-05	0.000280515	yes
GDF15	ENSG00000130513	19:18485540-18499986	con24	vir24	OK	10.9451	47.5913	2.12041	4.34817	4.84029	5e-05	0.000280515	yes
JUN	ENSG00000177606	1:59246464-59249785	con24	vir24	OK	2.10578	8.99533	2.09483	4.27176	4.8698	5e-05	0.000280515	yes
FOS	ENSG00000170345	14:75745476-75748933	con24	vir24	OK	8.8806	35.8019	2.01131	4.03148	4.34929	5e-05	0.000280515	yes
EGR1	ENSG00000120738	5:137801178-137805004	con24	vir24	OK	87.4412	328.926	1.91138	3.76169	5.8499	5e-05	0.000280515	yes
DNAJB9	ENSG00000128590	7:108110865-108215294	con24	vir24	OK	9.12691	30.6061	1.74562	3.35339	2.76543	5e-05	0.000280515	yes
DDIT3	ENSG00000175197	12:57853917-57914300	con24	vir24	OK	24.0329	77.0015	1.67988	3.20401	1.93658	5e-05	0.000280515	yes
MIR22HG	ENSG00000186594	17:1614804-1641893	con24	vir24	OK	2.12539	6.54646	1.62299	3.08013	1.28198	5e-05	0.000280515	yes
RGS16	ENSG00000143333	1:182567757-182573543	con24	vir24	OK	1.55029	4.54368	1.55133	2.93087	3.21802	5e-05	0.000280515	yes
CYR61	ENSG00000142871	1:86046443-86049645	con24	vir24	OK	4.80618	13.5206	1.49219	2.81316	3.72883	5e-05	0.000280515	yes
KLF6	ENSG00000067082	10:3818187-3827473	con24	vir24	OK	19.7666	55.3571	1.48571	2.80055	4.25287	5e-05	0.000280515	yes
FICD	ENSG00000198855	12:108908961-108955176	con24	vir24	OK	1.88136	5.24612	1.47947	2.78846	1.47773	0.0009	0.00404232	yes
CTGF	ENSG00000118523	6:132269315-132398533	con24	vir24	OK	4.29189	11.7848	1.45724	2.74583	3.52958	5e-05	0.000280515	yes
EGR2	ENSG00000122877	10:64571755-64679660	con24	vir24	OK	0.950016	2.51567	1.40492	2.64803	2.55177	5e-05	0.000280515	yes
GPR89B	ENSG00000188092	1:147400505-147465753	con24	vir24	OK	0.55362	1.4354	1.37448	2.59274	1.68366	5e-05	0.000280515	yes
CXCL3	ENSG00000163734	4:74902305-74904524	con24	vir24	OK	1.66993	4.2786	1.35735	2.56214	2.24979	5e-05	0.000280515	yes
SLC25A25	ENSG00000148339	9:130823511-130871604	con24	vir24	OK	3.97307	10.1007	1.34614	2.54231	2.97543	5e-05	0.000280515	yes
EDN1	ENSG00000078401	6:12290595-12297427	con24	vir24	OK	0.500655	1.25448	1.3252	2.50568	2.06746	5e-05	0.000280515	yes
MIR24-2	ENSG00000267519	19:13945329-13947173	con24	vir24	OK	1.08815	2.6218	1.26868	2.40941	1.10468	0.0003	0.00148912	yes
FBXO16	ENSG00000214050	8:28203101-28347835	con24	vir24	OK	9.70097	22.894	1.23877	2.35997	1.05805	0.0041	0.0156615	yes
ARRDC3	ENSG00000113369	5:90664540-90679176	con24	vir24	OK	13.9449	32.7917	1.2336	2.35153	3.07677	5e-05	0.000280515	yes
DDIT4	ENSG00000168209	10:74033677-74035794	con24	vir24	OK	63.4099	144.196	1.18525	2.27403	4.0766	5e-05	0.000280515	yes
SIK1	ENSG00000142178	21:44834394-44847008	con24	vir24	OK	3.53139	7.9364	1.16825	2.24739	2.80466	5e-05	0.000280515	yes
EREG	ENSG00000124882	4:75230859-75254468	con24	vir24	OK	17.5262	38.8281	1.14759	2.21544	3.29824	5e-05	0.000280515	yes
LURAP1L	ENSG00000153714	9:12685438-12822130	con24	vir24	OK	12.5354	27.2389	1.11967	2.17297	3.14374	5e-05	0.000280515	yes
CSRNP1	ENSG00000144655	3:39183345-39196053	con24	vir24	OK	3.19592	6.94281	1.11929	2.1724	2.61614	5e-05	0.000280515	yes
DUSP2	ENSG00000158050	2:96808904-96811179	con24	vir24	OK	1.32244	2.75594	1.05935	2.08399	1.74099	0.00015	0.000786087	yes
NR4A1	ENSG00000123358	12:52416615-52453291	con24	vir24	OK	7.59946	15.5375	1.03178	2.04455	1.72636	5e-05	0.000280515	yes
IER2	ENSG00000160888	19:13261228-13265722	con24	vir24	OK	19.2973	39.0112	1.01549	2.02159	3.12921	5e-05	0.000280515	yes
MRPS31P5	ENSG00000243406	13:52741843-52908412	con24	vir24	OK	3.37811	6.7803	1.00513	2.00712	1.31429	0.0011	0.00484329	yes
ZFP36	ENSG00000128016	19:39897452-39900052	con24	vir24	OK	11.6758	23.293	0.996377	1.99498	2.55263	5e-05	0.000280515	yes
RP11-571L19.8	ENSG00000272777	4:99988406-99989276	con24	vir24	OK	0.578978	1.14247	0.98058	1.97326	1.04913	0.01305	0.0428919	yes
MIS12	ENSG00000167842	17:5374570-5394134	con24	vir24	OK	27.9387	53.4506	0.935941	1.91314	1.82006	5e-05	0.000280515	yes
INSIG1	ENSG00000186480	7:155089485-155101945	con24	vir24	OK	199.614	379.218	0.92581	1.89975	2.95646	5e-05	0.000280515	yes
PPP1R15A	ENSG00000087074	19:49375648-49379314	con24	vir24	OK	11.8016	22.2402	0.914187	1.88451	2.85588	5e-05	0.000280515	yes
IRAK2	ENSG00000134070	3:10206548-10285427	con24	vir24	OK	0.825997	1.55394	0.911724	1.88129	1.71861	0.0001	0.000538822	yes
ERRFI1	ENSG00000116285	1:8064463-8086368	con24	vir24	OK	67.0274	125.468	0.904501	1.8719	3.03697	5e-05	0.000280515	yes
HERPUD1	ENSG00000051108	16:56965959-56977798	con24	vir24	OK	99.5943	185.035	0.893659	1.85788	2.37922	5e-05	0.000280515	yes
SERTAD1	ENSG00000197019	19:40927498-40931932	con24	vir24	OK	1.80709	3.31638	0.875939	1.8352	1.68069	0.0001	0.000538822	yes
RND3	ENSG00000115963	2:151324708-151395525	con24	vir24	OK	27.6095	50.4954	0.870986	1.82891	2.63569	5e-05	0.000280515	yes
EIF2AK3	ENSG00000172071	2:88838237-88931339	con24	vir24	OK	9.73476	17.761	0.867495	1.82449	1.75611	5e-05	0.000280515	yes
NABP1	ENSG00000173559	2:192542793-192561385	con24	vir24	OK	8.6225	15.575	0.853051	1.80632	1.89804	5e-05	0.000280515	yes
SEPT7P2	ENSG00000214765	7:45763378-45808617	con24	vir24	OK	1.75965	3.0619	0.799139	1.74006	0.994436	0.0065	0.0234796	yes
PTGS2	ENSG00000073756	1:186640922-186649559	con24	vir24	OK	5.03463	8.65069	0.780931	1.71824	1.77068	5e-05	0.000280515	yes
ZBTB43	ENSG00000169155	9:129567284-129600489	con24	vir24	OK	6.2654	10.5721	0.754781	1.68738	1.27592	0.0009	0.00404232	yes
XDH	ENSG00000158125	2:31557186-31637581	con24	vir24	OK	1.1536	1.93902	0.749184	1.68084	1.29663	0.00025	0.00125904	yes
FUT1	ENSG00000174951	19:49251267-49258647	con24	vir24	OK	6.09868	10.1465	0.73442	1.66373	1.70703	5e-05	0.000280515	yes
YOD1	ENSG00000180667	1:207217193-207254369	con24	vir24	OK	10.1236	16.6983	0.721979	1.64944	1.20012	0.0043	0.0163297	yes
TM4SF1	ENSG00000169908	3:149086808-149104370	con24	vir24	OK	31.6453	52.0979	0.719234	1.64631	1.8736	5e-05	0.000280515	yes
ZMYM5	ENSG00000132950	13:20397621-20437776	con24	vir24	OK	8.91218	14.6126	0.713363	1.63962	1.69212	5e-05	0.000280515	yes
RASSF1	ENSG00000068028	3:50367218-50378411	con24	vir24	OK	3.62224	5.93653	0.712739	1.63891	1.4846	0.0004	0.00193713	yes
RHOB	ENSG00000143878	2:20646834-20649200	con24	vir24	OK	27.1971	44.3966	0.706994	1.6324	2.31207	5e-05	0.000280515	yes
TSC22D2	ENSG00000196428	3:150126121-150184218	con24	vir24	OK	11.3982	18.5374	0.701626	1.62634	1.4447	0.00065	0.00300853	yes
TNFRSF12A	ENSG00000006327	16:3064712-3072384	con24	vir24	OK	18.0333	29.27	0.698764	1.62311	1.59112	0.00015	0.000786087	yes
HBEGF	ENSG00000113070	5:139712427-139726216	con24	vir24	OK	2.19897	3.52674	0.681504	1.60381	1.3443	0.001	0.00444512	yes
LARP1B	ENSG00000138709	4:128982422-129144086	con24	vir24	OK	14.1234	22.6256	0.679872	1.602	1.91411	5e-05	0.000280515	yes
VEGFA	ENSG00000112715	6:43737920-43754224	con24	vir24	OK	22.8747	36.6107	0.678511	1.60049	1.34812	0.0001	0.000538822	yes
CDKN2AIP	ENSG00000168564	4:184365743-184369351	con24	vir24	OK	11.8752	18.7849	0.661625	1.58186	1.84177	5e-05	0.000280515	yes
SEC24D	ENSG00000150961	4:119643977-119759838	con24	vir24	OK	11.5762	18.2613	0.657625	1.57748	1.49393	0.0001	0.000538822	yes
DNAJC3	ENSG00000102580	13:96329392-96447243	con24	vir24	OK	36.6489	57.4623	0.648846	1.56791	2.31076	5e-05	0.000280515	yes
MANF	ENSG00000145050	3:51422477-51426828	con24	vir24	OK	44.0015	68.9222	0.647416	1.56636	1.8623	5e-05	0.000280515	yes
FAM46A	ENSG00000112773	6:82201155-82462491	con24	vir24	OK	7.30734	11.366	0.637306	1.55542	1.60578	5e-05	0.000280515	yes
GPCPD1	ENSG00000125772	20:5525084-5591672	con24	vir24	OK	5.28405	8.19748	0.633535	1.55136	1.12672	0.00615	0.0223701	yes
ZFAND2A	ENSG00000178381	7:1191706-1204903	con24	vir24	OK	8.80644	13.6147	0.628535	1.54599	1.15497	0.0043	0.0163297	yes
E2F6	ENSG00000169016	2:11584500-11606297	con24	vir24	OK	5.17395	7.98409	0.625863	1.54313	1.23167	0.0021	0.00865243	yes
VCPKMT	ENSG00000100483	14:50575349-50583318	con24	vir24	OK	4.10691	6.33346	0.624942	1.54215	1.28802	0.00305	0.0120459	yes
MXD1	ENSG00000059728	2:70120691-70170077	con24	vir24	OK	5.30244	8.17609	0.624756	1.54195	1.42311	0.00035	0.0017153	yes
EAF2	ENSG00000145088	3:121554029-121605373	con24	vir24	OK	3.03464	4.65131	0.616109	1.53274	1.10175	0.00425	0.0161628	yes
ZC3H12C	ENSG00000149289	11:109964086-110042566	con24	vir24	OK	1.59173	2.43788	0.615033	1.53159	1.50906	0.0002	0.00102556	yes
DUSP6	ENSG00000139318	12:89741008-89747048	con24	vir24	OK	31.3413	47.9939	0.614788	1.53133	1.75874	5e-05	0.000280515	yes
CRELD2	ENSG00000184164	22:50293876-50321188	con24	vir24	OK	10.5131	16.0787	0.612962	1.5294	1.25219	0.00175	0.00735233	yes
TIPARP	ENSG00000163659	3:156389650-156424559	con24	vir24	OK	16.8222	25.6835	0.610472	1.52676	1.84958	5e-05	0.000280515	yes
GADD45A	ENSG00000116717	1:68150743-68154021	con24	vir24	OK	5.79329	8.81361	0.60535	1.52135	1.40232	0.00075	0.00342499	yes
COQ10B	ENSG00000115520	2:198318146-198340032	con24	vir24	OK	13.2414	20.0713	0.60008	1.5158	1.58946	0.0001	0.000538822	yes
FAM84A	ENSG00000162981	2:14772809-14790933	con24	vir24	OK	1.23072	0.798715	-0.623754	-1.54088	-1.01726	0.0111	0.0373579	yes
KRT20	ENSG00000171431	17:39032192-39041479	con24	vir24	OK	4.38422	2.65409	-0.724105	-1.65188	-1.42463	0.0003	0.00148912	yes
ADH1C	ENSG00000248144	4:100257648-100274184	con24	vir24	OK	7.42551	4.44113	-0.741563	-1.67199	-1.0605	0.0101	0.0344001	yes
TCP11L2	ENSG00000166046	12:106631654-106740793	con24	vir24	OK	14.3658	7.96015	-0.851765	-1.80471	-0.912331	0.00635	0.0230026	yes
REG4	ENSG00000134193	1:120336640-120354283	con24	vir24	OK	92.8784	51.2522	-0.857729	-1.81218	-2.76524	5e-05	0.000280515	yes
PCP4	ENSG00000183036	21:41239242-41301322	con24	vir24	OK	2.45047	1.15361	-1.0869	-2.12417	-1.46069	5e-05	0.000280515	yes

## Sheet: C parvum infected cells 24 hpi
Supplementary table 1: Differentially expressed genes (DEGs) mapped to Homo sapiens in HCT-8 cells infected with BCoV, C. parvum or both agents at both 24 and 72 hpi. Positive fold-change values indicate gene upregulation in infected HCT-8 cells.
gene	gene_id	sample_1	sample_2	status	value_1	value_2	log2_FC	Fold Change (FC)	test_stat	p_value	q_value	significant
MTATP6P1	ENSG00000248527	con24	par24	OK	95.9742	283.993	1.56514	2.95906	3.97654	5e-05	0.000280515	yes
MT-ND4L	ENSG00000212907	con24	par24	OK	10271.3	29919.7	1.54248	2.91295	2.79448	5e-05	0.000280515	yes
MT-ATP6	ENSG00000198899	con24	par24	OK	1153.27	3165.62	1.45675	2.74489	1.45516	0.00095	0.0042445	yes
MT-ATP8	ENSG00000228253	con24	par24	OK	22470.7	61401.9	1.45024	2.73254	1.41525	0.00135	0.00582408	yes
MT-ND2	ENSG00000198763	con24	par24	OK	625.598	1675.53	1.42131	2.67829	4.89653	5e-05	0.000280515	yes
MT-ND4	ENSG00000198886	con24	par24	OK	1729.46	4631.06	1.42102	2.67775	3.76677	5e-05	0.000280515	yes
MTND4P12	ENSG00000247627	con24	par24	OK	4.12871	10.9607	1.40857	2.65474	1.51912	0.0011	0.00484329	yes
MT-ND1	ENSG00000198888	con24	par24	OK	1082	2825.68	1.3849	2.61154	4.41099	5e-05	0.000280515	yes
MT-CYB	ENSG00000198727	con24	par24	OK	1512.96	3921.66	1.37409	2.59204	3.96624	5e-05	0.000280515	yes
MT-CO2	ENSG00000198712	con24	par24	OK	3708.67	9486.18	1.35492	2.55783	4.23612	5e-05	0.000280515	yes
MIR24-2	ENSG00000267519	con24	par24	OK	1.08815	2.69231	1.30697	2.47421	1.14645	0.00025	0.00125904	yes
hsa-mir-6723	ENSG00000237973	con24	par24	OK	4.04918	9.78592	1.27308	2.41677	1.08438	0.00965	0.0330716	yes
MT-CO1	ENSG00000198804	con24	par24	OK	1984.84	4655.75	1.22999	2.34565	4.03731	5e-05	0.000280515	yes
MT-ND5	ENSG00000198786	con24	par24	OK	776.614	1721.05	1.14802	2.2161	3.52237	5e-05	0.000280515	yes
MTND2P28	ENSG00000225630	con24	par24	OK	28.3985	62.7231	1.14318	2.20867	1.88422	5e-05	0.000280515	yes
EGR2	ENSG00000122877	con24	par24	OK	0.950016	2.06057	1.11702	2.16898	1.99454	5e-05	0.000280515	yes
MT-ND6	ENSG00000198695	con24	par24	OK	300.645	587.531	0.966604	1.95424	3.32395	5e-05	0.000280515	yes
MT-ND3	ENSG00000198840	con24	par24	OK	4726.28	9207.84	0.962158	1.94822	3.32568	5e-05	0.000280515	yes
MT-CO3	ENSG00000198938	con24	par24	OK	5249.51	10212.6	0.960093	1.94544	2.16929	5e-05	0.000280515	yes
RP6-99M1.2	ENSG00000270069	con24	par24	OK	0.989752	1.91494	0.95216	1.93477	1.42423	0.00095	0.0042445	yes
JUN	ENSG00000177606	con24	par24	OK	2.10578	3.97918	0.918121	1.88965	2.05416	5e-05	0.000280515	yes
CTD-2651B20.3	ENSG00000259520	con24	par24	OK	1.67613	3.14294	0.906982	1.87512	1.02239	0.0127	0.0419115	yes
NEAT1	ENSG00000245532	con24	par24	OK	57.9909	107.301	0.88776	1.8503	1.82954	5e-05	0.000280515	yes
PAQR6	ENSG00000160781	con24	par24	OK	2.72444	4.7621	0.805637	1.74792	1.54828	0.0001	0.000538822	yes
RP11-473M20.7	ENSG00000261971	con24	par24	OK	3.82049	6.46359	0.758578	1.69182	1.05289	0.0045	0.0170022	yes
GSTM2	ENSG00000213366	con24	par24	OK	2.68556	4.41074	0.715798	1.64239	1.15784	0.00145	0.00621209	yes
KLHL11	ENSG00000178502	con24	par24	OK	8.4209	5.5412	-0.603776	-1.51969	-1.54995	0.0004	0.00193713	yes
MAP6D1	ENSG00000180834	con24	par24	OK	2.39068	1.54506	-0.629762	-1.54731	-0.972532	0.0083	0.029044	yes
ZNF460	ENSG00000197714	con24	par24	OK	3.4564	1.95142	-0.824744	-1.77122	-1.51018	0.0001	0.000538822	yes
HIST1H2AM	ENSG00000233224	con24	par24	OK	4.74055	2.35222	-1.01103	-2.01535	-1.15415	0.0058	0.0212505	yes
SNHG7	ENSG00000233016	con24	par24	OK	2380.47	834.846	-1.51166	-2.85138	-1.27761	0.00635	0.0230026	yes

## Sheet: Co-infected cells 24 hpi
Supplementary table 1: Differentially expressed genes (DEGs) mapped to Homo sapiens in HCT-8 cells infected with BCoV, C. parvum or both agents at both 24 and 72 hpi. Positive fold-change values indicate gene upregulation in infected HCT-8 cells.
gene	gene_id	sample_1	sample_2	status	value_1	value_2	log2_FC	Fold Change (FC)	test_stat	p_value	q_value	significant
ANKRD1	ENSG00000148677	con24	vir_par24	OK	0.348031	16.7535	5.5891	48.1379	9.28089	5e-05	0.000280515	yes
IL1A	ENSG00000115008	con24	vir_par24	OK	0.249645	3.93909	3.97991	15.7787	5.56216	5e-05	0.000280515	yes
IL8	ENSG00000169429	con24	vir_par24	OK	0.878509	13.1869	3.9079	15.0105	5.21871	5e-05	0.000280515	yes
ATF3	ENSG00000162772	con24	vir_par24	OK	2.26391	23.6553	3.38528	10.4489	6.7074	5e-05	0.000280515	yes
CXCL2	ENSG00000081041	con24	vir_par24	OK	0.442863	4.09347	3.20839	9.24318	3.44905	5e-05	0.000280515	yes
RP11-383J24.1	ENSG00000253227	con24	vir_par24	OK	0.250253	1.47179	2.55611	5.8812	1.74952	0.00305	0.0120459	yes
NR4A3	ENSG00000119508	con24	vir_par24	OK	0.277403	1.14435	2.04448	4.12525	3.26814	5e-05	0.000280515	yes
JUN	ENSG00000177606	con24	vir_par24	OK	2.10578	8.43624	2.00225	4.00624	4.68436	5e-05	0.000280515	yes
DNAJB9	ENSG00000128590	con24	vir_par24	OK	9.12691	34.4554	1.91653	3.77514	3.05525	5e-05	0.000280515	yes
DUSP1	ENSG00000120129	con24	vir_par24	OK	1.6343	6.15019	1.91196	3.7632	3.78837	5e-05	0.000280515	yes
DDIT3	ENSG00000175197	con24	vir_par24	OK	24.0329	87.3148	1.86122	3.63315	2.21222	5e-05	0.000280515	yes
EGR2	ENSG00000122877	con24	vir_par24	OK	0.950016	3.3046	1.79845	3.47846	3.34725	5e-05	0.000280515	yes
FOSB	ENSG00000125740	con24	vir_par24	OK	0.891975	3.07341	1.78476	3.44561	1.23436	0.0124	0.0410665	yes
FICD	ENSG00000198855	con24	vir_par24	OK	1.88136	6.42565	1.77206	3.41541	1.79928	0.0002	0.00102556	yes
CYR61	ENSG00000142871	con24	vir_par24	OK	4.80618	16.082	1.74248	3.3461	4.39143	5e-05	0.000280515	yes
RGS16	ENSG00000143333	con24	vir_par24	OK	1.55029	5.14419	1.73041	3.31822	3.62283	5e-05	0.000280515	yes
CTGF	ENSG00000118523	con24	vir_par24	OK	4.29189	14.2177	1.72801	3.31271	4.22135	5e-05	0.000280515	yes
KLF6	ENSG00000067082	con24	vir_par24	OK	19.7666	65.4042	1.72632	3.30883	5.25815	5e-05	0.000280515	yes
MIR22HG	ENSG00000186594	con24	vir_par24	OK	2.12539	7.0155	1.72282	3.30081	1.3987	5e-05	0.000280515	yes
CXCL3	ENSG00000163734	con24	vir_par24	OK	1.66993	5.37692	1.68699	3.21984	2.83142	5e-05	0.000280515	yes
SLC25A25	ENSG00000148339	con24	vir_par24	OK	3.97307	12.0902	1.60551	3.04303	3.56531	5e-05	0.000280515	yes
EDN1	ENSG00000078401	con24	vir_par24	OK	0.500655	1.52246	1.60451	3.04092	2.53264	5e-05	0.000280515	yes
SIK1	ENSG00000142178	con24	vir_par24	OK	3.53139	10.096	1.51548	2.85894	3.70048	5e-05	0.000280515	yes
CREB5	ENSG00000146592	con24	vir_par24	OK	1.04603	2.95335	1.49743	2.82339	0.921277	0.0006	0.00279836	yes
FBXO16	ENSG00000214050	con24	vir_par24	OK	9.70097	26.5561	1.45284	2.73746	1.25424	0.00045	0.00215616	yes
GDF15	ENSG00000130513	con24	vir_par24	OK	10.9451	29.5364	1.43221	2.6986	3.33385	5e-05	0.000280515	yes
LURAP1L	ENSG00000153714	con24	vir_par24	OK	12.5354	32.5044	1.37463	2.59301	3.84938	5e-05	0.000280515	yes
CSRNP1	ENSG00000144655	con24	vir_par24	OK	3.19592	8.01387	1.32627	2.50754	3.09053	5e-05	0.000280515	yes
EREG	ENSG00000124882	con24	vir_par24	OK	17.5262	43.6467	1.31636	2.49037	3.86997	5e-05	0.000280515	yes
MAFF	ENSG00000185022	con24	vir_par24	OK	5.44072	13.3639	1.29647	2.45627	2.56375	5e-05	0.000280515	yes
OSGIN1	ENSG00000140961	con24	vir_par24	OK	2.02073	4.94113	1.28996	2.44521	1.04772	0.0087	0.0302495	yes
MAP3K14	ENSG00000006062	con24	vir_par24	OK	1.5762	3.58251	1.18452	2.27288	1.94774	5e-05	0.000280515	yes
DUSP5	ENSG00000138166	con24	vir_par24	OK	3.00163	6.79692	1.17914	2.26442	2.67185	5e-05	0.000280515	yes
TSPYL2	ENSG00000184205	con24	vir_par24	OK	5.60954	12.611	1.16872	2.24812	2.85981	5e-05	0.000280515	yes
ERRFI1	ENSG00000116285	con24	vir_par24	OK	67.0274	150.528	1.1672	2.24575	3.88057	5e-05	0.000280515	yes
HBEGF	ENSG00000113070	con24	vir_par24	OK	2.19897	4.9381	1.16713	2.24565	2.34269	5e-05	0.000280515	yes
ZC3H12A	ENSG00000163874	con24	vir_par24	OK	1.71446	3.82774	1.15874	2.23262	1.39	0.0008	0.00363136	yes
EIF2AK3	ENSG00000172071	con24	vir_par24	OK	9.73476	21.5664	1.14757	2.2154	2.39012	5e-05	0.000280515	yes
INSIG1	ENSG00000186480	con24	vir_par24	OK	199.614	440.891	1.14321	2.20872	3.60072	5e-05	0.000280515	yes
IL10RA	ENSG00000110324	con24	vir_par24	OK	0.643627	1.42143	1.14305	2.20847	1.12724	0.00025	0.00125904	yes
ZNF165	ENSG00000197279	con24	vir_par24	OK	4.95982	10.74	1.11463	2.16539	2.75894	5e-05	0.000280515	yes
PPP1R15A	ENSG00000087074	con24	vir_par24	OK	11.8016	25.5529	1.1145	2.1652	3.49538	5e-05	0.000280515	yes
IER3	ENSG00000137331	con24	vir_par24	OK	15.9313	34.1706	1.10089	2.14487	2.97644	5e-05	0.000280515	yes
HERPUD1	ENSG00000051108	con24	vir_par24	OK	99.5943	212.924	1.0962	2.13791	2.9283	5e-05	0.000280515	yes
DDIT4	ENSG00000168209	con24	vir_par24	OK	63.4099	135.137	1.09164	2.13116	3.74513	5e-05	0.000280515	yes
RND3	ENSG00000115963	con24	vir_par24	OK	27.6095	57.9365	1.06931	2.09843	3.27018	5e-05	0.000280515	yes
CLIP4	ENSG00000115295	con24	vir_par24	OK	2.13191	4.46321	1.06593	2.09352	1.01164	0.00275	0.0109946	yes
FAM46A	ENSG00000112773	con24	vir_par24	OK	7.30734	15.2208	1.05862	2.08294	2.4898	5e-05	0.000280515	yes
DNAJC25,DNAJC25-GNG10	ENSG00000059769,ENSG00000244115	con24	vir_par24	OK	3.19243	6.59627	1.04699	2.06621	1.84789	5e-05	0.000280515	yes
FKBP14	ENSG00000106080	con24	vir_par24	OK	14.0221	28.7266	1.03469	2.04867	0.880585	0.01245	0.0412082	yes
AC093106.5	ENSG00000236281	con24	vir_par24	OK	1.1778	2.40041	1.02718	2.03804	1.13825	0.0076	0.0269067	yes
IRAK2	ENSG00000134070	con24	vir_par24	OK	0.825997	1.66627	1.01241	2.01728	1.9159	0.0001	0.000538822	yes
GPCPD1	ENSG00000125772	con24	vir_par24	OK	5.28405	10.5724	1.00058	2.0008	1.81664	5e-05	0.000280515	yes
ARRDC3	ENSG00000113369	con24	vir_par24	OK	13.9449	27.6623	0.988187	1.98369	2.40059	5e-05	0.000280515	yes
MIS12	ENSG00000167842	con24	vir_par24	OK	27.9387	53.9939	0.950532	1.93259	1.8179	5e-05	0.000280515	yes
NABP1	ENSG00000173559	con24	vir_par24	OK	8.6225	16.6521	0.949524	1.93124	2.14821	5e-05	0.000280515	yes
XDH	ENSG00000158125	con24	vir_par24	OK	1.1536	2.19906	0.930747	1.90626	1.63831	5e-05	0.000280515	yes
FOSL1	ENSG00000175592	con24	vir_par24	OK	2.30247	4.36293	0.922117	1.89489	1.72019	5e-05	0.000280515	yes
TNFRSF12A	ENSG00000006327	con24	vir_par24	OK	18.0333	33.8906	0.910226	1.87934	2.17861	5e-05	0.000280515	yes
MRPS31P5	ENSG00000243406	con24	vir_par24	OK	3.37811	6.30754	0.900861	1.86718	1.16092	0.0037	0.0143048	yes
TM4SF1	ENSG00000169908	con24	vir_par24	OK	31.6453	58.9557	0.897641	1.86302	2.36723	5e-05	0.000280515	yes
ZBTB43	ENSG00000169155	con24	vir_par24	OK	6.2654	11.6576	0.895789	1.86063	1.48006	5e-05	0.000280515	yes
GADD45A	ENSG00000116717	con24	vir_par24	OK	5.79329	10.6955	0.88455	1.84619	2.08712	5e-05	0.000280515	yes
DUSP10	ENSG00000143507	con24	vir_par24	OK	1.49524	2.75584	0.88212	1.84308	1.68293	5e-05	0.000280515	yes
SEC24D	ENSG00000150961	con24	vir_par24	OK	11.5762	21.2931	0.879218	1.83938	2.08838	5e-05	0.000280515	yes
CDKN2AIP	ENSG00000168564	con24	vir_par24	OK	11.8752	21.6341	0.865363	1.8218	2.42818	5e-05	0.000280515	yes
DUSP6	ENSG00000139318	con24	vir_par24	OK	31.3413	56.9981	0.862849	1.81863	2.51662	5e-05	0.000280515	yes
SGK1	ENSG00000118515	con24	vir_par24	OK	3.78566	6.87958	0.861773	1.81727	1.15252	0.00025	0.00125904	yes
MCL1	ENSG00000143384	con24	vir_par24	OK	73.3835	133.204	0.860106	1.81517	3.03192	5e-05	0.000280515	yes
RP11-443P15.2	ENSG00000171658	con24	vir_par24	OK	1.60803	2.91252	0.856978	1.81124	0.990322	0.01085	0.0366186	yes
LARP1B	ENSG00000138709	con24	vir_par24	OK	14.1234	25.4303	0.848468	1.80059	2.41346	5e-05	0.000280515	yes
EPHA2	ENSG00000142627	con24	vir_par24	OK	9.57922	17.1027	0.836243	1.78539	2.39631	5e-05	0.000280515	yes
LARP1BP1	ENSG00000231442	con24	vir_par24	OK	0.930023	1.6599	0.835757	1.78479	1.40064	0.00065	0.00300853	yes
RP11-61N20.3	ENSG00000226268	con24	vir_par24	OK	9.02304	16.1042	0.835747	1.78478	1.87598	5e-05	0.000280515	yes
SERTAD1	ENSG00000197019	con24	vir_par24	OK	1.80709	3.21073	0.829233	1.77674	1.58111	0.00015	0.000786087	yes
ZMYM5	ENSG00000132950	con24	vir_par24	OK	8.91218	15.8155	0.827485	1.77459	1.99816	5e-05	0.000280515	yes
RP11-443N24.1	ENSG00000255725	con24	vir_par24	OK	10.9595	19.2461	0.812384	1.75611	1.29437	0.00235	0.00956308	yes
MPZL3	ENSG00000160588	con24	vir_par24	OK	12.5165	21.9495	0.810363	1.75365	1.98552	5e-05	0.000280515	yes
AMOTL2	ENSG00000114019	con24	vir_par24	OK	18.0327	31.3179	0.796369	1.73672	2.48275	5e-05	0.000280515	yes
ZC3H12C	ENSG00000149289	con24	vir_par24	OK	1.59173	2.73339	0.780095	1.71724	1.93641	5e-05	0.000280515	yes
CDR2	ENSG00000140743	con24	vir_par24	OK	9.33005	15.9647	0.774926	1.7111	1.63556	5e-05	0.000280515	yes
YOD1	ENSG00000180667	con24	vir_par24	OK	10.1236	17.3177	0.774528	1.71063	1.34639	0.00175	0.00735233	yes
RASSF1	ENSG00000068028	con24	vir_par24	OK	3.62224	6.1665	0.767571	1.7024	1.5996	5e-05	0.000280515	yes
MXD1	ENSG00000059728	con24	vir_par24	OK	5.30244	9.01625	0.765871	1.7004	1.78515	5e-05	0.000280515	yes
PARD6B	ENSG00000124171	con24	vir_par24	OK	16.9045	28.7187	0.764586	1.69888	2.49395	5e-05	0.000280515	yes
MSH6	ENSG00000116062	con24	vir_par24	OK	4.66556	7.91323	0.762217	1.6961	0.928527	0.0032	0.0125691	yes
UAP1	ENSG00000117143	con24	vir_par24	OK	21.5515	36.1903	0.747814	1.67925	2.42959	5e-05	0.000280515	yes
PEAR1	ENSG00000187800	con24	vir_par24	OK	2.40942	4.03928	0.745415	1.67646	1.56512	0.0001	0.000538822	yes
TSC22D2	ENSG00000196428	con24	vir_par24	OK	11.3982	19.107	0.745291	1.67631	1.70943	0.00015	0.000786087	yes
MAP3K8	ENSG00000107968	con24	vir_par24	OK	4.46767	7.46748	0.741097	1.67145	1.33627	0.00115	0.0050426	yes
YRDC	ENSG00000196449	con24	vir_par24	OK	7.8266	13.0756	0.740418	1.67066	1.75379	5e-05	0.000280515	yes
MANF	ENSG00000145050	con24	vir_par24	OK	44.0015	73.1938	0.734169	1.66344	2.22322	5e-05	0.000280515	yes
ZNF699	ENSG00000196110	con24	vir_par24	OK	6.10576	10.1534	0.733717	1.66292	1.65171	5e-05	0.000280515	yes
DCUN1D2	ENSG00000150401	con24	vir_par24	OK	13.8443	22.8601	0.723535	1.65122	1.20522	0.00215	0.00883839	yes
RHOB	ENSG00000143878	con24	vir_par24	OK	27.1971	44.7926	0.719805	1.64696	2.3433	5e-05	0.000280515	yes
TNFAIP3	ENSG00000118503	con24	vir_par24	OK	1.02076	1.66976	0.710002	1.63581	0.858826	0.0056	0.0206091	yes
DNAJC3	ENSG00000102580	con24	vir_par24	OK	36.6489	59.8403	0.707347	1.6328	2.50167	5e-05	0.000280515	yes
NFKBIB	ENSG00000104825	con24	vir_par24	OK	4.93662	8.03739	0.703202	1.62811	1.29431	0.0016	0.00678703	yes
SPRY4	ENSG00000187678	con24	vir_par24	OK	7.09145	11.5263	0.700772	1.62537	1.92186	5e-05	0.000280515	yes
TDG	ENSG00000139372	con24	vir_par24	OK	11.8378	19.1822	0.696376	1.62043	1.63368	5e-05	0.000280515	yes
ZFAND2A	ENSG00000178381	con24	vir_par24	OK	8.80644	14.2389	0.693211	1.61688	1.26649	0.00165	0.00697706	yes
PTGS2	ENSG00000073756	con24	vir_par24	OK	5.03463	8.13237	0.691791	1.61529	1.58308	0.00015	0.000786087	yes
RP5-850E9.3	ENSG00000270299	con24	vir_par24	OK	30.5625	49.3623	0.691647	1.61513	1.45123	0.00185	0.00772735	yes
XBP1	ENSG00000100219	con24	vir_par24	OK	62.7564	101.185	0.689162	1.61235	2.36637	5e-05	0.000280515	yes
THUMPD2	ENSG00000138050	con24	vir_par24	OK	7.04535	11.3387	0.686516	1.60939	1.50814	0.0002	0.00102556	yes
VCPKMT	ENSG00000100483	con24	vir_par24	OK	4.10691	6.6037	0.685222	1.60795	1.41226	0.0015	0.00640294	yes
VIMP	ENSG00000131871	con24	vir_par24	OK	22.1874	35.436	0.675473	1.59712	1.91352	5e-05	0.000280515	yes
HSP90B3P	ENSG00000203914	con24	vir_par24	OK	11.586	18.4856	0.674018	1.59551	1.82384	5e-05	0.000280515	yes
PRDM4	ENSG00000110851	con24	vir_par24	OK	13.2168	21.0664	0.672574	1.59391	1.83964	5e-05	0.000280515	yes
HRH1	ENSG00000196639	con24	vir_par24	OK	4.91523	7.82815	0.671415	1.59263	1.62947	5e-05	0.000280515	yes
BHLHE40	ENSG00000134107	con24	vir_par24	OK	8.56401	13.551	0.662043	1.58232	1.80159	5e-05	0.000280515	yes
ZBTB49	ENSG00000168826	con24	vir_par24	OK	1.44896	2.29214	0.661681	1.58192	0.973911	0.00445	0.0168332	yes
SESN2	ENSG00000130766	con24	vir_par24	OK	5.8594	9.26583	0.661168	1.58136	1.772	5e-05	0.000280515	yes
ZSCAN12P1	ENSG00000219891	con24	vir_par24	OK	3.80786	5.98354	0.652021	1.57137	1.24973	0.0011	0.00484329	yes
SERTAD3	ENSG00000167565	con24	vir_par24	OK	12.3653	19.259	0.639236	1.5575	1.51043	0.0002	0.00102556	yes
CEP85L	ENSG00000111860	con24	vir_par24	OK	1.86776	2.90522	0.637339	1.55546	1.02953	0.00235	0.00956308	yes
PGM3	ENSG00000013375	con24	vir_par24	OK	82.2099	127.869	0.63728	1.55539	1.15171	0.0036	0.0139619	yes
DUSP4	ENSG00000120875	con24	vir_par24	OK	2.64211	4.10555	0.635885	1.55389	1.62508	0.0001	0.000538822	yes
LONRF3	ENSG00000175556	con24	vir_par24	OK	1.90398	2.94542	0.629459	1.54698	1.26544	0.0027	0.010817	yes
USP36	ENSG00000055483	con24	vir_par24	OK	18.9189	29.1511	0.623718	1.54084	1.19182	0.0032	0.0125691	yes
MAPK6	ENSG00000069956	con24	vir_par24	OK	26.8331	41.3397	0.62351	1.54062	0.891339	0.00745	0.0264455	yes
ESRP1	ENSG00000104413	con24	vir_par24	OK	8.14216	12.5275	0.62162	1.5386	1.27418	0.0003	0.00148912	yes
PLK2	ENSG00000145632	con24	vir_par24	OK	20.6473	31.7633	0.621406	1.53837	1.23993	0.0001	0.000538822	yes
PTBP2	ENSG00000117569	con24	vir_par24	OK	13.9126	21.3598	0.618501	1.53528	1.23015	0.00055	0.00258647	yes
CCNYL1	ENSG00000163249	con24	vir_par24	OK	7.39168	11.3272	0.615811	1.53242	1.6603	5e-05	0.000280515	yes
DNAJC27	ENSG00000115137	con24	vir_par24	OK	3.07734	4.70902	0.613741	1.53022	0.898759	0.0033	0.0129193	yes
PDP1	ENSG00000164951	con24	vir_par24	OK	12.919	19.756	0.612803	1.52923	1.82037	5e-05	0.000280515	yes
ZNF527	ENSG00000189164	con24	vir_par24	OK	8.19887	12.5296	0.611849	1.52822	1.20622	0.003	0.0118715	yes
FUT1	ENSG00000174951	con24	vir_par24	OK	6.09868	9.30954	0.610214	1.52649	1.4188	5e-05	0.000280515	yes
COQ10B	ENSG00000115520	con24	vir_par24	OK	13.2414	20.1925	0.608762	1.52495	1.62678	0.0001	0.000538822	yes
EAF2	ENSG00000145088	con24	vir_par24	OK	3.03464	4.61927	0.606139	1.52218	1.09006	0.0053	0.0196394	yes
TUFT1	ENSG00000143367	con24	vir_par24	OK	12.0282	18.2977	0.605236	1.52123	1.79804	5e-05	0.000280515	yes
DNAJC8P1	ENSG00000259022	con24	vir_par24	OK	11.4599	17.3768	0.600559	1.5163	1.06506	0.00865	0.0300995	yes
OVOL1	ENSG00000172818	con24	vir_par24	OK	4.87891	7.3906	0.599133	1.51481	1.4521	0.00025	0.00125904	yes
RAB12	ENSG00000206418	con24	vir_par24	OK	9.1535	13.8338	0.595799	1.51131	1.29166	0.0003	0.00148912	yes
SLC2A3	ENSG00000059804	con24	vir_par24	OK	23.1669	35.0122	0.595791	1.5113	1.0911	0.00795	0.0279799	yes
NRBF2	ENSG00000148572	con24	vir_par24	OK	7.24527	10.8778	0.586271	1.50136	1.44883	0.0002	0.00102556	yes
TSC22D3	ENSG00000157514	con24	vir_par24	OK	12.3584	18.5403	0.58517	1.50022	1.58839	5e-05	0.000280515	yes
PIGA	ENSG00000165195	con24	vir_par24	OK	7.61174	11.4056	0.583449	1.49843	1.00374	0.0101	0.0344001	yes
UBC	ENSG00000150991	con24	vir_par24	OK	349.178	522.451	0.581335	1.49623	1.21685	0.00265	0.0106403	yes
TIPARP	ENSG00000163659	con24	vir_par24	OK	16.8222	25.1528	0.580348	1.49521	1.79341	5e-05	0.000280515	yes
KRT20	ENSG00000171431	con24	vir_par24	OK	4.38422	2.83381	-0.629576	-1.54711	-1.24061	0.0015	0.00640294	yes
ZNF460	ENSG00000197714	con24	vir_par24	OK	3.4564	2.23266	-0.630506	-1.54811	-1.2642	0.00085	0.0038374	yes
HIST1H2AG	ENSG00000196787	con24	vir_par24	OK	1.47585	0.849797	-0.796354	-1.73671	-1.3488	0.0008	0.00363136	yes
REG4	ENSG00000134193	con24	vir_par24	OK	92.8784	46.2474	-1.00597	-2.00829	-3.24227	5e-05	0.000280515	yes
TCP11L2	ENSG00000166046	con24	vir_par24	OK	14.3658	7.00323	-1.03654	-2.0513	-1.05174	0.00065	0.00300853	yes
RN7SK	ENSG00000202198	con24	vir_par24	OK	2516.63	1075.57	-1.22639	-2.33981	-3.92577	5e-05	0.000280515	yes
SNHG7	ENSG00000233016	con24	vir_par24	OK	2380.47	973.059	-1.29065	-2.44638	-1.2704	0.0066	0.0237922	yes
HIST1H1B	ENSG00000184357	con24	vir_par24	OK	5.9005	2.31382	-1.35056	-2.55011	-2.2134	5e-05	0.000280515	yes
RP5-1011O1.2	ENSG00000232498	con24	vir_par24	OK	1.09602	0.351544	-1.6405	-3.11774	-1.09106	0.00865	0.0300995	yes

## Sheet: BCoV infected cells 72 hpi
Supplementary table 1: Differentially expressed genes (DEGs) mapped to Homo sapiens in HCT-8 cells infected with BCoV, C. parvum or both agents at both 24 and 72 hpi. Positive fold-change values indicate gene upregulation in infected HCT-8 cells.
gene	gene_ID	sample_1	sample_2	status	value_1	value_2	log2_FC	Fold Change (FC)	test_stat	p_value	q_value	significant
IL8	ENSG00000169429	con72	vir72	OK	6.11023	1978.43	8.33891	323.789	14.445	5e-05	0.000280515	yes
KIAA1239	ENSG00000174145	con72	vir72	OK	0.0344569	5.72838	7.37719	166.248	9.30894	5e-05	0.000280515	yes
CXCL2	ENSG00000081041	con72	vir72	OK	1.46431	203.587	7.11928	139.033	13.3498	5e-05	0.000280515	yes
ANKRD1	ENSG00000148677	con72	vir72	OK	1.00708	112.121	6.79874	111.333	14.4853	5e-05	0.000280515	yes
CBR3	ENSG00000159231	con72	vir72	OK	0.360142	31.1638	6.43516	86.5319	3.59437	0.00515	0.0191479	yes
EDN1	ENSG00000078401	con72	vir72	OK	0.645679	43.8875	6.08685	67.9711	11.8088	5e-05	0.000280515	yes
GCNT4	ENSG00000176928	con72	vir72	OK	0.0415628	2.79698	6.07243	67.2951	5.21659	5e-05	0.000280515	yes
RP11-383J24.1	ENSG00000253227	con72	vir72	OK	0.468655	29.0609	5.95441	62.0092	6.49729	5e-05	0.000280515	yes
RSAD2	ENSG00000134321	con72	vir72	OK	0.212725	13.0806	5.94229	61.4904	3.81309	5e-05	0.000280515	yes
TM4SF1	ENSG00000169908	con72	vir72	OK	41.8817	2370.13	5.8225	56.591	14.7717	5e-05	0.000280515	yes
IL1A	ENSG00000115008	con72	vir72	OK	1.41382	66.0332	5.54552	46.7055	12.0115	5e-05	0.000280515	yes
CYR61	ENSG00000142871	con72	vir72	OK	4.84488	220.662	5.50923	45.5453	15.1347	5e-05	0.000280515	yes
C6orf141	ENSG00000197261	con72	vir72	OK	0.414756	18.6963	5.49434	45.0776	4.964	5e-05	0.000280515	yes
CXCL1	ENSG00000163739	con72	vir72	OK	0.653388	29.3839	5.49094	44.9715	8.32012	5e-05	0.000280515	yes
CXCL3	ENSG00000163734	con72	vir72	OK	3.63351	158.564	5.44756	43.6394	12.2087	5e-05	0.000280515	yes
MMP13	ENSG00000137745	con72	vir72	OK	0.103202	4.2159	5.3523	40.851	5.4081	5e-05	0.000280515	yes
SRXN1	ENSG00000271303	con72	vir72	OK	8.89132	344.057	5.2741	38.6957	3.99487	5e-05	0.000280515	yes
FSTL4	ENSG00000053108	con72	vir72	OK	0.177643	6.53334	5.20077	36.778	2.99142	5e-05	0.000280515	yes
TPTE2	ENSG00000132958	con72	vir72	OK	0.0486281	1.78281	5.19622	36.6622	1.33388	0.00265	0.0106403	yes
TNFAIP3	ENSG00000118503	con72	vir72	OK	1.20209	44.051	5.19556	36.6454	6.9604	5e-05	0.000280515	yes
DTNA	ENSG00000134769	con72	vir72	OK	0.717422	24.3888	5.08725	33.995	4.01689	5e-05	0.000280515	yes
CSGALNACT1	ENSG00000147408	con72	vir72	OK	0.0761939	2.44999	5.00696	32.1548	0.785492	5e-05	0.000280515	yes
DUSP1	ENSG00000120129	con72	vir72	OK	3.45841	108.195	4.96738	31.2846	12.351	5e-05	0.000280515	yes
DKK1	ENSG00000107984	con72	vir72	OK	0.440729	13.0401	4.88692	29.5876	4.39793	5e-05	0.000280515	yes
PLA2G4C	ENSG00000105499	con72	vir72	OK	0.87277	25.4519	4.86603	29.1622	3.91858	5e-05	0.000280515	yes
CCRN4L	ENSG00000151014	con72	vir72	OK	1.84907	51.3692	4.79603	27.7811	4.63582	5e-05	0.000280515	yes
ZC3H12A	ENSG00000163874	con72	vir72	OK	1.994	52.8678	4.72865	26.5134	6.36621	5e-05	0.000280515	yes
RP11-513I15.6	ENSG00000225339	con72	vir72	OK	0.0684488	1.79123	4.70978	26.1689	0.306023	0.00025	0.00125904	yes
SIK1	ENSG00000142178	con72	vir72	OK	4.22466	106.274	4.6528	25.1555	11.7148	5e-05	0.000280515	yes
PLAGL1	ENSG00000118495	con72	vir72	OK	0.430318	10.7287	4.63993	24.9321	6.47714	5e-05	0.000280515	yes
SPON1	ENSG00000152268	con72	vir72	OK	0.0758104	1.84767	4.60717	24.3723	3.6855	5e-05	0.000280515	yes
RASD1	ENSG00000108551	con72	vir72	OK	0.099774	2.33697	4.54983	23.4226	4.07769	5e-05	0.000280515	yes
NEURL3	ENSG00000163121	con72	vir72	OK	0.872565	20.3854	4.54613	23.3626	8.26001	5e-05	0.000280515	yes
OSGIN1	ENSG00000140961	con72	vir72	OK	4.3359	101.244	4.54536	23.3502	5.92993	5e-05	0.000280515	yes
DUSP5	ENSG00000138166	con72	vir72	OK	7.8028	181.232	4.5377	23.2265	13.2648	5e-05	0.000280515	yes
GEM	ENSG00000164949	con72	vir72	OK	5.51859	124.603	4.4969	22.5788	12.1255	5e-05	0.000280515	yes
C4orf19	ENSG00000154274	con72	vir72	OK	1.88862	41.3292	4.45176	21.8833	7.17001	5e-05	0.000280515	yes
TNFRSF9	ENSG00000049249	con72	vir72	OK	1.17839	25.5226	4.43689	21.6589	8.3687	5e-05	0.000280515	yes
CRYAB	ENSG00000109846	con72	vir72	OK	0.685196	14.6641	4.41962	21.4012	2.38891	5e-05	0.000280515	yes
AOC3	ENSG00000131471	con72	vir72	OK	0.249095	5.27247	4.40371	21.1665	3.79994	5e-05	0.000280515	yes
ALOXE3	ENSG00000179148	con72	vir72	OK	1.14824	23.8298	4.37527	20.7533	8.83155	5e-05	0.000280515	yes
PDE10A	ENSG00000112541	con72	vir72	OK	0.0894347	1.81707	4.34463	20.3172	2.52962	5e-05	0.000280515	yes
BCL6	ENSG00000113916	con72	vir72	OK	8.46357	170.651	4.33364	20.163	4.96826	5e-05	0.000280515	yes
CDKN2B	ENSG00000147883	con72	vir72	OK	0.380472	7.61968	4.32387	20.0269	2.27052	0.0004	0.00193713	yes
TINCR	ENSG00000223573	con72	vir72	OK	0.18532	3.66064	4.304	19.753	3.11466	5e-05	0.000280515	yes
DMRT1	ENSG00000137090	con72	vir72	OK	0.173158	3.3417	4.27042	19.2985	3.91967	5e-05	0.000280515	yes
IRAK2	ENSG00000134070	con72	vir72	OK	0.969117	17.6907	4.19018	18.2545	9.2827	5e-05	0.000280515	yes
SFN	ENSG00000175793	con72	vir72	OK	11.3156	201.807	4.1566	17.8345	11.289	5e-05	0.000280515	yes
KLF6	ENSG00000067082	con72	vir72	OK	34.0195	576.492	4.08287	16.946	10.2094	5e-05	0.000280515	yes
RAB30	ENSG00000137502	con72	vir72	OK	4.6899	77.4466	4.04557	16.5135	2.67618	5e-05	0.000280515	yes
FOSB	ENSG00000125740	con72	vir72	OK	1.09195	17.9483	4.03886	16.4368	3.23263	5e-05	0.000280515	yes
ETS1	ENSG00000134954	con72	vir72	OK	4.69565	76.8901	4.0334	16.3747	10.2941	5e-05	0.000280515	yes
TRPV3	ENSG00000167723	con72	vir72	OK	1.65784	26.8178	4.01582	16.1764	8.00097	5e-05	0.000280515	yes
SPDYA	ENSG00000163806	con72	vir72	OK	0.107607	1.73967	4.01497	16.1669	0.338379	0.0001	0.000538822	yes
DUSP10	ENSG00000143507	con72	vir72	OK	1.69477	27.0599	3.997	15.9668	8.69861	5e-05	0.000280515	yes
KPNA7	ENSG00000185467	con72	vir72	OK	0.166936	2.65753	3.99272	15.9195	4.46934	5e-05	0.000280515	yes
CSRNP1	ENSG00000144655	con72	vir72	OK	4.17903	66.5169	3.99248	15.9168	10.9479	5e-05	0.000280515	yes
FBXO16	ENSG00000214050	con72	vir72	OK	14.4539	227.777	3.9781	15.759	4.94543	5e-05	0.000280515	yes
INSIG1	ENSG00000186480	con72	vir72	OK	94.7113	1485.07	3.97085	15.68	11.4552	5e-05	0.000280515	yes
FAM46A	ENSG00000112773	con72	vir72	OK	9.02159	137.924	3.93435	15.2882	9.27394	5e-05	0.000280515	yes
ADM	ENSG00000148926	con72	vir72	OK	3.48915	53.2783	3.9326	15.2697	6.68214	5e-05	0.000280515	yes
FOSL1	ENSG00000175592	con72	vir72	OK	4.11653	61.7482	3.9069	15.0001	9.19949	5e-05	0.000280515	yes
OASL	ENSG00000135114	con72	vir72	OK	0.965354	14.3916	3.89803	14.9082	7.70753	5e-05	0.000280515	yes
SOCS3	ENSG00000184557	con72	vir72	OK	0.388048	5.76697	3.89351	14.8615	5.11069	5e-05	0.000280515	yes
PTGR1	ENSG00000106853	con72	vir72	OK	60.6282	886.324	3.86977	14.619	10.1623	5e-05	0.000280515	yes
DNAJC25,DNAJC25-GNG10	ENSG00000059769	con72	vir72	OK	3.80758	55.2401	3.85877	14.5079	8.22793	5e-05	0.000280515	yes
JUN	ENSG00000177606	con72	vir72	OK	3.78019	54.4107	3.84736	14.3936	10.9016	5e-05	0.000280515	yes
SGK1	ENSG00000118515	con72	vir72	OK	4.7511	68.3428	3.84646	14.3847	4.93543	5e-05	0.000280515	yes
AOC2	ENSG00000131480	con72	vir72	OK	0.632755	8.90702	3.81522	14.0765	7.35356	5e-05	0.000280515	yes
RELB	ENSG00000104856	con72	vir72	OK	3.10533	43.6671	3.81373	14.062	6.63475	5e-05	0.000280515	yes
MFSD2A	ENSG00000168389	con72	vir72	OK	1.62974	22.8921	3.81214	14.0465	5.99415	5e-05	0.000280515	yes
RND1	ENSG00000172602	con72	vir72	OK	1.30624	18.2284	3.80269	13.9548	5.2132	5e-05	0.000280515	yes
SNORD3B-2	ENSG00000262074	con72	vir72	OK	0.128915	1.77943	3.78693	13.8032	1.18009	0.01265	0.0417736	yes
FAM46B	ENSG00000158246	con72	vir72	OK	0.92939	12.6933	3.77164	13.6577	7.84681	5e-05	0.000280515	yes
E2F6	ENSG00000169016	con72	vir72	OK	7.38473	100.712	3.76954	13.6378	9.35332	5e-05	0.000280515	yes
CASS4	ENSG00000087589	con72	vir72	OK	0.0822256	1.12061	3.76856	13.6285	3.20545	5e-05	0.000280515	yes
SDCBP2	ENSG00000125775	con72	vir72	OK	2.12399	28.6399	3.75318	13.484	3.62121	5e-05	0.000280515	yes
CA3	ENSG00000164879	con72	vir72	OK	0.171217	2.22436	3.69949	12.9914	0.894809	0.00035	0.0017153	yes
PMEPA1	ENSG00000124225	con72	vir72	OK	1.10793	14.1696	3.67685	12.7892	7.09821	5e-05	0.000280515	yes
CFLAR-AS1	ENSG00000226312	con72	vir72	OK	0.203909	2.56337	3.65204	12.5711	0.607884	5e-05	0.000280515	yes
KRTAP3-1	ENSG00000212901	con72	vir72	OK	0.276607	3.46635	3.64751	12.5317	2.40915	0.0051	0.0189869	yes
MATN1-AS1	ENSG00000186056	con72	vir72	OK	0.79521	9.91372	3.64002	12.4668	3.95253	5e-05	0.000280515	yes
HSPB8	ENSG00000152137	con72	vir72	OK	0.140142	1.73945	3.63367	12.4121	1.48484	0.00245	0.00992345	yes
C2orf82	ENSG00000182600	con72	vir72	OK	0.357531	4.43415	3.63252	12.4022	0.574289	0.0003	0.00148912	yes
ZBTB49	ENSG00000168826	con72	vir72	OK	1.58123	19.5062	3.62481	12.3361	4.57171	5e-05	0.000280515	yes
SLC25A25	ENSG00000148339	con72	vir72	OK	6.06487	73.2722	3.59472	12.0814	9.81441	5e-05	0.000280515	yes
IL10RA	ENSG00000110324	con72	vir72	OK	0.757553	9.13676	3.59226	12.0609	4.48672	5e-05	0.000280515	yes
DUSP2	ENSG00000158050	con72	vir72	OK	1.07454	12.9347	3.58946	12.0375	6.44688	5e-05	0.000280515	yes
NFKBIA	ENSG00000100906	con72	vir72	OK	10.5939	124.693	3.55707	11.7702	9.70157	5e-05	0.000280515	yes
PLEKHO1	ENSG00000023902	con72	vir72	OK	0.778546	9.13308	3.55225	11.731	4.79059	5e-05	0.000280515	yes
PROX1	ENSG00000117707	con72	vir72	OK	0.555954	6.49658	3.54664	11.6854	2.09558	5e-05	0.000280515	yes
AC141586.5	ENSG00000215154	con72	vir72	OK	0.750734	8.71471	3.53708	11.6083	4.59477	5e-05	0.000280515	yes
ITPKC	ENSG00000086544	con72	vir72	OK	3.73436	43.0629	3.52751	11.5315	5.50067	5e-05	0.000280515	yes
ARRDC3	ENSG00000113369	con72	vir72	OK	14.3287	165.01	3.52557	11.516	9.16537	5e-05	0.000280515	yes
ABL2	ENSG00000143322	con72	vir72	OK	4.35784	50.0166	3.52072	11.4774	4.28204	5e-05	0.000280515	yes
SLC20A1	ENSG00000144136	con72	vir72	OK	29.8375	341.504	3.5167	11.4454	8.42195	5e-05	0.000280515	yes
CREB5	ENSG00000146592	con72	vir72	OK	4.13843	47.304	3.51481	11.4304	3.6901	5e-05	0.000280515	yes
RELT	ENSG00000054967	con72	vir72	OK	1.4818	16.6696	3.49179	11.2495	7.35238	5e-05	0.000280515	yes
CABYR	ENSG00000154040	con72	vir72	OK	4.46286	49.9861	3.48549	11.2005	2.6285	5e-05	0.000280515	yes
FLRT3	ENSG00000125848	con72	vir72	OK	0.638346	7.14562	3.48465	11.194	4.18133	5e-05	0.000280515	yes
DLX2	ENSG00000115844	con72	vir72	OK	0.224689	2.50586	3.47931	11.1526	4.9073	5e-05	0.000280515	yes
RP11-1012A1.4	ENSG00000258466	con72	vir72	OK	0.306695	3.41359	3.47641	11.1302	0.231728	0.00355	0.0137904	yes
ZBTB43	ENSG00000169155	con72	vir72	OK	6.60895	72.8563	3.46256	11.0239	5.00076	5e-05	0.000280515	yes
NR4A3	ENSG00000119508	con72	vir72	OK	0.438754	4.77219	3.44317	10.8767	6.58066	5e-05	0.000280515	yes
GLA	ENSG00000102393	con72	vir72	OK	12.4683	132.297	3.40744	10.6106	3.85477	5e-05	0.000280515	yes
LINC00431	ENSG00000225760	con72	vir72	OK	0.124143	1.31543	3.40546	10.5961	1.91811	0.0032	0.0125691	yes
IL12A	ENSG00000168811	con72	vir72	OK	0.614343	6.47845	3.39853	10.5453	1.84459	5e-05	0.000280515	yes
IGF2BP2	ENSG00000073792	con72	vir72	OK	20.0756	210.766	3.39212	10.4986	1.80656	5e-05	0.000280515	yes
AC093616.4	ENSG00000234231	con72	vir72	OK	0.213481	2.2307	3.38532	10.4492	3.9843	5e-05	0.000280515	yes
CTGF	ENSG00000118523	con72	vir72	OK	6.19593	64	3.36868	10.3294	9.39508	5e-05	0.000280515	yes
HMOX1	ENSG00000100292	con72	vir72	OK	2.73882	28.1077	3.35934	10.2627	7.49658	5e-05	0.000280515	yes
ASIC4	ENSG00000072182	con72	vir72	OK	0.144588	1.47888	3.35449	10.2283	1.09508	5e-05	0.000280515	yes
HMGCS1	ENSG00000112972	con72	vir72	OK	112.974	1154	3.35258	10.2147	9.98038	5e-05	0.000280515	yes
MIS12	ENSG00000167842	con72	vir72	OK	39.9008	407.314	3.35165	10.2082	6.95267	5e-05	0.000280515	yes
TNFRSF12A	ENSG00000006327	con72	vir72	OK	51.6011	521.326	3.33671	10.103	10.5401	5e-05	0.000280515	yes
RASSF1	ENSG00000068028	con72	vir72	OK	5.24712	52.7582	3.32979	10.0546	8.52083	5e-05	0.000280515	yes
ZNF165	ENSG00000197279	con72	vir72	OK	7.49909	75.3764	3.32933	10.0514	9.62684	5e-05	0.000280515	yes
GUCA1B	ENSG00000112599	con72	vir72	OK	2.48373	24.8027	3.31991	9.98602	7.18918	5e-05	0.000280515	yes
FSTL3	ENSG00000070404	con72	vir72	OK	13.2824	131.309	3.30538	9.88595	10.0753	5e-05	0.000280515	yes
GCLC	ENSG00000001084	con72	vir72	OK	73.9274	724.377	3.29256	9.79849	9.06147	5e-05	0.000280515	yes
NABP1	ENSG00000173559	con72	vir72	OK	12.7825	124.228	3.28075	9.71861	8.38677	5e-05	0.000280515	yes
MAP3K14	ENSG00000006062	con72	vir72	OK	1.85146	17.9572	3.27783	9.69896	4.97677	5e-05	0.000280515	yes
DNAJB5	ENSG00000137094	con72	vir72	OK	2.69661	26.1433	3.27722	9.69486	7.77801	5e-05	0.000280515	yes
MIR22HG	ENSG00000186594	con72	vir72	OK	8.49351	81.4052	3.26069	9.58441	5.05642	5e-05	0.000280515	yes
DNAJB9	ENSG00000128590	con72	vir72	OK	38.351	363.186	3.24337	9.47004	7.22666	5e-05	0.000280515	yes
ALDH8A1	ENSG00000118514	con72	vir72	OK	0.166938	1.57679	3.23961	9.44539	1.55353	5e-05	0.000280515	yes
NFKBIB	ENSG00000104825	con72	vir72	OK	5.27352	49.7176	3.23692	9.42779	6.5265	5e-05	0.000280515	yes
PIM3	ENSG00000198355	con72	vir72	OK	9.35617	88.159	3.23612	9.42257	9.5331	5e-05	0.000280515	yes
CTRL	ENSG00000141086	con72	vir72	OK	0.634434	5.94056	3.22706	9.36358	1.32887	0.00015	0.000786087	yes
AC006262.6	ENSG00000268460	con72	vir72	OK	0.469012	4.35046	3.21347	9.27579	4.71656	5e-05	0.000280515	yes
CLEC4A	ENSG00000111729	con72	vir72	OK	0.858058	7.92178	3.20668	9.23224	3.15177	5e-05	0.000280515	yes
BIRC3	ENSG00000023445	con72	vir72	OK	5.32711	48.9445	3.19972	9.1878	4.82848	5e-05	0.000280515	yes
SERTAD1	ENSG00000197019	con72	vir72	OK	3.91957	35.9267	3.19629	9.16599	8.08188	5e-05	0.000280515	yes
SNHG15	ENSG00000232956	con72	vir72	OK	39.5106	361.253	3.19269	9.14314	1.41651	5e-05	0.000280515	yes
IL6R	ENSG00000160712	con72	vir72	OK	2.13541	19.4527	3.18739	9.10961	6.25654	5e-05	0.000280515	yes
MAFK	ENSG00000198517	con72	vir72	OK	3.06629	27.8748	3.1844	9.09075	5.34868	5e-05	0.000280515	yes
RGS16	ENSG00000143333	con72	vir72	OK	5.45924	49.4392	3.17888	9.05604	8.94184	5e-05	0.000280515	yes
HTR1D	ENSG00000179546	con72	vir72	OK	0.112761	1.02058	3.17805	9.05083	2.29558	5e-05	0.000280515	yes
MUC4	ENSG00000145113	con72	vir72	OK	0.659155	5.96231	3.17718	9.04537	2.40923	5e-05	0.000280515	yes
TRIB1	ENSG00000173334	con72	vir72	OK	9.40699	84.6729	3.17009	9.00103	8.3532	5e-05	0.000280515	yes
TVP23C-CDRT4	ENSG00000259024	con72	vir72	OK	1.17646	10.5513	3.16491	8.96877	2.31806	5e-05	0.000280515	yes
PLIN2	ENSG00000147872	con72	vir72	OK	14.0532	125.705	3.16107	8.94493	7.12925	5e-05	0.000280515	yes
TSPYL2	ENSG00000184205	con72	vir72	OK	7.83068	69.9076	3.15824	8.9274	8.53283	5e-05	0.000280515	yes
MANF	ENSG00000145050	con72	vir72	OK	49.5221	441.223	3.15536	8.9096	9.55142	5e-05	0.000280515	yes
CCNYL1	ENSG00000163249	con72	vir72	OK	6.55556	58.2863	3.15237	8.89115	8.79787	5e-05	0.000280515	yes
NFKBIE	ENSG00000146232	con72	vir72	OK	1.76707	15.6722	3.14878	8.86905	3.29379	5e-05	0.000280515	yes
FAM209A	ENSG00000124103	con72	vir72	OK	0.14072	1.24147	3.14115	8.82227	0.351623	0.00915	0.031589	yes
TUFT1	ENSG00000143367	con72	vir72	OK	11.4978	101.41	3.14078	8.82001	9.69801	5e-05	0.000280515	yes
IER3	ENSG00000137331	con72	vir72	OK	38.3518	337.522	3.13761	8.80065	10.2584	5e-05	0.000280515	yes
MX2	ENSG00000183486	con72	vir72	OK	0.144143	1.26815	3.13715	8.79784	1.16544	5e-05	0.000280515	yes
LYG1	ENSG00000144214	con72	vir72	OK	0.906467	7.95907	3.13427	8.7803	0.620306	0.005	0.018656	yes
RP11-114H23.1	ENSG00000258077	con72	vir72	OK	0.22315	1.95743	3.13288	8.77184	2.53927	5e-05	0.000280515	yes
FICD	ENSG00000198855	con72	vir72	OK	3.53608	30.9633	3.13033	8.75635	4.52582	5e-05	0.000280515	yes
BACH2	ENSG00000112182	con72	vir72	OK	0.604412	5.26692	3.12336	8.71415	2.74293	5e-05	0.000280515	yes
PVT1	ENSG00000249859	con72	vir72	OK	16.2537	141.57	3.12267	8.70998	5.66382	5e-05	0.000280515	yes
S100A2	ENSG00000196754	con72	vir72	OK	2.20135	19.1486	3.12077	8.69852	5.47313	5e-05	0.000280515	yes
LURAP1L	ENSG00000153714	con72	vir72	OK	57.4326	498.066	3.11639	8.67215	10.5736	5e-05	0.000280515	yes
POU2F2	ENSG00000028277	con72	vir72	OK	0.128216	1.10583	3.10849	8.62479	0.780128	5e-05	0.000280515	yes
FTL	ENSG00000087086	con72	vir72	OK	4780.98	41228.8	3.10827	8.62348	5.73086	5e-05	0.000280515	yes
EIF2AK3	ENSG00000172071	con72	vir72	OK	13.3479	114.605	3.10199	8.58602	6.72444	5e-05	0.000280515	yes
SNAI1	ENSG00000124216	con72	vir72	OK	1.27223	10.9219	3.10179	8.58483	5.76268	5e-05	0.000280515	yes
MSANTD3	ENSG00000066697	con72	vir72	OK	6.02846	51.7075	3.10051	8.57722	6.9811	5e-05	0.000280515	yes
TP53INP2	ENSG00000078804	con72	vir72	OK	4.53869	38.9181	3.10009	8.57472	4.66601	5e-05	0.000280515	yes
RASGRP3	ENSG00000152689	con72	vir72	OK	1.01881	8.69183	3.09277	8.53133	2.46954	5e-05	0.000280515	yes
ANKRD30BL	ENSG00000163046	con72	vir72	OK	0.257698	2.19687	3.09169	8.52494	2.91696	5e-05	0.000280515	yes
PPIF	ENSG00000108179	con72	vir72	OK	19.3699	164.823	3.08903	8.50924	9.27406	5e-05	0.000280515	yes
IPPK	ENSG00000127080	con72	vir72	OK	3.59985	30.6031	3.08767	8.50122	2.66832	5e-05	0.000280515	yes
CTD-2547E10.2	ENSG00000180747	con72	vir72	OK	0.860215	7.29725	3.08458	8.48303	2.18488	0.0001	0.000538822	yes
RND3	ENSG00000115963	con72	vir72	OK	52.4291	441.68	3.07456	8.42432	9.20572	5e-05	0.000280515	yes
TM4SF1-AS1	ENSG00000240541	con72	vir72	OK	0.33155	2.79022	3.07308	8.41568	0.345721	0.00925	0.0318869	yes
GPR3	ENSG00000181773	con72	vir72	OK	1.24693	10.4486	3.06686	8.37948	6.04155	5e-05	0.000280515	yes
SAMD4A	ENSG00000020577	con72	vir72	OK	6.10484	50.8237	3.05748	8.32517	7.06943	5e-05	0.000280515	yes
CLIP4	ENSG00000115295	con72	vir72	OK	6.61951	54.3778	3.03822	8.21477	3.94298	5e-05	0.000280515	yes
RNU6ATAC	ENSG00000221676	con72	vir72	OK	270.225	2215.76	3.03557	8.19969	4.27951	5e-05	0.000280515	yes
MAP2	ENSG00000078018	con72	vir72	OK	3.65022	29.8809	3.03317	8.18606	6.23348	5e-05	0.000280515	yes
AMIGO3	ENSG00000176020	con72	vir72	OK	1.05557	8.60004	3.02632	8.14729	2.44372	5e-05	0.000280515	yes
AKAP17A	ENSG00000197976	con72	vir72	OK	2.84527	23.0863	3.0204	8.11393	8.10915	5e-05	0.000280515	yes
RGCC	ENSG00000102760	con72	vir72	OK	0.283706	2.29322	3.01491	8.08311	2.18355	5e-05	0.000280515	yes
ZSCAN12P1	ENSG00000219891	con72	vir72	OK	6.59152	53.2643	3.01449	8.08075	4.79349	5e-05	0.000280515	yes
PPP1R15A	ENSG00000087074	con72	vir72	OK	42.7003	342.284	3.00287	8.01593	9.89261	5e-05	0.000280515	yes
AC099522.1	ENSG00000183900	con72	vir72	OK	0.416584	3.31261	2.99129	7.95185	4.80103	5e-05	0.000280515	yes
AC008132.12	ENSG00000234764	con72	vir72	OK	1.22144	9.70172	2.98966	7.94287	4.60142	5e-05	0.000280515	yes
MAFF	ENSG00000185022	con72	vir72	OK	11.816	93.7846	2.98861	7.93709	8.18854	5e-05	0.000280515	yes
AGAP6	ENSG00000204149	con72	vir72	OK	0.721404	5.72279	2.98784	7.93285	5.77391	5e-05	0.000280515	yes
LONRF3	ENSG00000175556	con72	vir72	OK	3.8369	30.3761	2.98492	7.91681	7.86644	5e-05	0.000280515	yes
PIWIL2	ENSG00000197181	con72	vir72	OK	1.14876	9.07643	2.98205	7.90108	4.61521	5e-05	0.000280515	yes
LIPG	ENSG00000101670	con72	vir72	OK	12.7825	100.03	2.96818	7.82548	9.6324	5e-05	0.000280515	yes
YPEL4	ENSG00000166793	con72	vir72	OK	0.710914	5.53616	2.96114	7.78739	2.29437	5e-05	0.000280515	yes
SEC24D	ENSG00000150961	con72	vir72	OK	15.044	117.139	2.96097	7.78647	7.80713	5e-05	0.000280515	yes
TMEM39A	ENSG00000176142	con72	vir72	OK	66.9746	521.183	2.9601	7.78178	5.97426	5e-05	0.000280515	yes
CLDN4	ENSG00000189143	con72	vir72	OK	113.498	881.754	2.95771	7.7689	9.37209	5e-05	0.000280515	yes
RAET1L	ENSG00000155918	con72	vir72	OK	2.27517	17.6212	2.95327	7.74503	5.62683	5e-05	0.000280515	yes
SQSTM1	ENSG00000161011	con72	vir72	OK	186.31	1442.54	2.95284	7.74272	8.32935	5e-05	0.000280515	yes
VTRNA2-1	ENSG00000270123	con72	vir72	OK	62.9304	484.981	2.9461	7.70663	5.17154	0.0028	0.0111735	yes
CLCF1	ENSG00000175505	con72	vir72	OK	1.19495	9.17562	2.94086	7.67869	2.87825	5e-05	0.000280515	yes
RGS2	ENSG00000116741	con72	vir72	OK	2.19901	16.8802	2.9404	7.67624	5.55304	5e-05	0.000280515	yes
PEA15	ENSG00000162734	con72	vir72	OK	88.4258	675.064	2.93248	7.63422	6.56934	5e-05	0.000280515	yes
VIMP	ENSG00000131871	con72	vir72	OK	34.7001	264.864	2.93224	7.63295	9.5211	5e-05	0.000280515	yes
STK17A	ENSG00000164543	con72	vir72	OK	13.779	104.75	2.92641	7.60216	6.00052	5e-05	0.000280515	yes
GPCPD1	ENSG00000125772	con72	vir72	OK	7.50276	56.9195	2.92343	7.58648	6.0869	5e-05	0.000280515	yes
DENND5A	ENSG00000184014	con72	vir72	OK	15.0861	114.367	2.92238	7.58096	6.44783	5e-05	0.000280515	yes
MARCH3	ENSG00000173926	con72	vir72	OK	0.958996	7.25446	2.91927	7.56463	3.17568	5e-05	0.000280515	yes
TBC1D30	ENSG00000111490	con72	vir72	OK	4.58957	34.7075	2.91882	7.56227	4.80414	5e-05	0.000280515	yes
CTD-2016O11.1	ENSG00000248846	con72	vir72	OK	0.194923	1.46552	2.91043	7.51842	2.2122	0.00125	0.00543393	yes
DDR2	ENSG00000162733	con72	vir72	OK	0.293532	2.20261	2.90763	7.50384	1.87231	5e-05	0.000280515	yes
SLC9A5	ENSG00000135740	con72	vir72	OK	0.628277	4.69779	2.90251	7.47726	2.39264	5e-05	0.000280515	yes
AEN	ENSG00000181026	con72	vir72	OK	15.4023	114.974	2.90009	7.46473	9.39146	5e-05	0.000280515	yes
WHAMM	ENSG00000156232	con72	vir72	OK	3.14261	23.2714	2.88852	7.4051	5.96304	5e-05	0.000280515	yes
USPL1	ENSG00000132952	con72	vir72	OK	24.2134	179.18	2.88753	7.40002	7.37751	5e-05	0.000280515	yes
C3orf52	ENSG00000114529	con72	vir72	OK	12.769	94.4221	2.88648	7.39464	8.27419	5e-05	0.000280515	yes
DPYSL3	ENSG00000113657	con72	vir72	OK	0.188371	1.39015	2.88359	7.37984	1.45387	5e-05	0.000280515	yes
KCTD5	ENSG00000167977	con72	vir72	OK	6.31479	46.5289	2.88132	7.36824	7.88373	5e-05	0.000280515	yes
GADD45B	ENSG00000099860	con72	vir72	OK	27.6081	202.689	2.87611	7.34168	5.93469	5e-05	0.000280515	yes
GADD45A	ENSG00000116717	con72	vir72	OK	20.9658	153.244	2.86972	7.30923	9.16755	5e-05	0.000280515	yes
GMPPB	ENSG00000173540	con72	vir72	OK	6.15823	44.9932	2.86912	7.30619	4.47856	5e-05	0.000280515	yes
USP36	ENSG00000055483	con72	vir72	OK	24.3105	177.376	2.86716	7.29627	5.74432	5e-05	0.000280515	yes
RP11-430C7.5	ENSG00000240219	con72	vir72	OK	0.179169	1.3071	2.86698	7.29536	1.90796	0.00075	0.00342499	yes
RP11-24F11.2	ENSG00000223552	con72	vir72	OK	0.496005	3.61209	2.86441	7.28238	3.02446	0.00225	0.00920323	yes
LDLR	ENSG00000130164	con72	vir72	OK	37.7816	274.957	2.86345	7.27754	5.81509	5e-05	0.000280515	yes
ABCC2	ENSG00000023839	con72	vir72	OK	0.183587	1.33252	2.85962	7.25824	2.31171	5e-05	0.000280515	yes
SEC31A	ENSG00000138674	con72	vir72	OK	32.88	237.824	2.85461	7.23308	3.03286	5e-05	0.000280515	yes
RIPK4	ENSG00000183421	con72	vir72	OK	2.37835	17.167	2.8516	7.218	7.28421	5e-05	0.000280515	yes
PRDM4	ENSG00000110851	con72	vir72	OK	11.6753	84.1988	2.85034	7.2117	7.44369	5e-05	0.000280515	yes
KCNJ14	ENSG00000182324	con72	vir72	OK	2.44205	17.4137	2.83405	7.13073	2.92191	5e-05	0.000280515	yes
RP11-443P15.2	ENSG00000171658	con72	vir72	OK	4.12276	29.3576	2.83205	7.12085	4.58811	5e-05	0.000280515	yes
MICB	ENSG00000204516	con72	vir72	OK	2.17868	15.4678	2.82774	7.09961	5.65822	5e-05	0.000280515	yes
AC004980.7	ENSG00000205485	con72	vir72	OK	1.11817	7.91668	2.82375	7.08	1.94233	5e-05	0.000280515	yes
CCT6P3	ENSG00000234585	con72	vir72	OK	1.23545	8.73553	2.82186	7.07073	3.80744	5e-05	0.000280515	yes
NEDD9	ENSG00000111859	con72	vir72	OK	5.75234	40.6421	2.82075	7.0653	7.33279	5e-05	0.000280515	yes
TIPARP	ENSG00000163659	con72	vir72	OK	21.34	150.673	2.81979	7.0606	8.84138	5e-05	0.000280515	yes
ATF3	ENSG00000162772	con72	vir72	OK	27.4872	193.137	2.81279	7.02642	9.18441	5e-05	0.000280515	yes
RP11-345J4.8	ENSG00000205534	con72	vir72	OK	0.858172	6.02632	2.81194	7.02228	4.63102	5e-05	0.000280515	yes
ERRFI1	ENSG00000116285	con72	vir72	OK	298.583	2096.03	2.81146	7.01995	9.06236	5e-05	0.000280515	yes
TFE3	ENSG00000068323	con72	vir72	OK	11.0804	77.024	2.79729	6.95133	6.88545	5e-05	0.000280515	yes
RP11-337C18.4	ENSG00000213226	con72	vir72	OK	0.652033	4.53089	2.79678	6.94888	3.73656	5e-05	0.000280515	yes
FTLP2	ENSG00000232368	con72	vir72	OK	10.2912	71.3939	2.79439	6.93738	6.09179	5e-05	0.000280515	yes
RP11-752L20.1	ENSG00000249004	con72	vir72	OK	0.493731	3.39867	2.78317	6.88363	2.62327	5e-05	0.000280515	yes
ADRB1	ENSG00000043591	con72	vir72	OK	1.46168	9.98881	2.77268	6.83376	6.07223	5e-05	0.000280515	yes
NDEL1	ENSG00000166579	con72	vir72	OK	22.2004	151.663	2.77221	6.83154	4.78325	5e-05	0.000280515	yes
JMJD1C	ENSG00000171988	con72	vir72	OK	21.7548	148.616	2.77218	6.83139	4.14837	5e-05	0.000280515	yes
SEMA7A	ENSG00000138623	con72	vir72	OK	1.57899	10.7482	2.76702	6.807	4.88342	5e-05	0.000280515	yes
NPC1	ENSG00000141458	con72	vir72	OK	28.1879	191.257	2.76236	6.78505	6.29358	5e-05	0.000280515	yes
YRDC	ENSG00000196449	con72	vir72	OK	13.2025	89.4629	2.76048	6.77622	7.84747	5e-05	0.000280515	yes
JMJD6	ENSG00000070495	con72	vir72	OK	6.40941	43.3829	2.75886	6.76861	6.99595	5e-05	0.000280515	yes
NRIP3	ENSG00000175352	con72	vir72	OK	0.635116	4.29794	2.75855	6.76716	4.05856	5e-05	0.000280515	yes
DNAJC6	ENSG00000116675	con72	vir72	OK	2.27483	15.3055	2.75022	6.7282	6.00159	5e-05	0.000280515	yes
HRH1	ENSG00000196639	con72	vir72	OK	9.44593	63.5089	2.74919	6.7234	8.04313	5e-05	0.000280515	yes
TUBA8	ENSG00000183785	con72	vir72	OK	0.244664	1.63513	2.74053	6.68316	0.628548	0.00885	0.0306957	yes
FAM53C	ENSG00000120709	con72	vir72	OK	29.9692	199.02	2.73136	6.64081	5.25763	5e-05	0.000280515	yes
FOS	ENSG00000170345	con72	vir72	OK	11.6115	77.084	2.73088	6.6386	6.99329	5e-05	0.000280515	yes
RASGEF1B	ENSG00000138670	con72	vir72	OK	1.00558	6.66712	2.72904	6.63014	4.35003	5e-05	0.000280515	yes
PISD	ENSG00000241878	con72	vir72	OK	15.0328	99.5945	2.72795	6.62514	3.67109	5e-05	0.000280515	yes
RP11-213H15.4	ENSG00000271762	con72	vir72	OK	1.90413	12.5654	2.72225	6.59901	2.39874	5e-05	0.000280515	yes
PIP5K1A	ENSG00000143398	con72	vir72	OK	165.996	1091.75	2.71742	6.57696	5.41263	5e-05	0.000280515	yes
PLK2	ENSG00000145632	con72	vir72	OK	24.6804	162.283	2.71708	6.57541	5.60775	5e-05	0.000280515	yes
HKDC1	ENSG00000156510	con72	vir72	OK	0.41463	2.72438	2.71603	6.57062	2.42812	5e-05	0.000280515	yes
EGR3	ENSG00000179388	con72	vir72	OK	2.49986	16.4246	2.71594	6.57021	1.39941	0.0091	0.0314403	yes
USP53	ENSG00000145390	con72	vir72	OK	20.2294	132.855	2.71533	6.56743	6.03363	5e-05	0.000280515	yes
FTLP3	ENSG00000226608	con72	vir72	OK	129.142	847.033	2.71346	6.55893	6.55623	5e-05	0.000280515	yes
CXCL5	ENSG00000163735	con72	vir72	OK	31.4864	206.139	2.71081	6.54689	8.97272	5e-05	0.000280515	yes
TSC22D2	ENSG00000196428	con72	vir72	OK	17.438	114.148	2.7106	6.54594	7.2657	5e-05	0.000280515	yes
MCL1	ENSG00000143384	con72	vir72	OK	84.474	551.182	2.70595	6.52487	8.57469	5e-05	0.000280515	yes
CDR2	ENSG00000140743	con72	vir72	OK	12.5166	81.4335	2.70178	6.50604	6.31055	5e-05	0.000280515	yes
TXNL4B	ENSG00000140830	con72	vir72	OK	4.14566	26.8741	2.69654	6.48245	3.59795	5e-05	0.000280515	yes
GCNT2	ENSG00000111846	con72	vir72	OK	2.29554	14.8103	2.6897	6.45179	3.00805	5e-05	0.000280515	yes
RP11-443N24.1	ENSG00000255725	con72	vir72	OK	16.4956	106.143	2.68586	6.43464	5.37062	5e-05	0.000280515	yes
BHLHA15	ENSG00000180535	con72	vir72	OK	0.657631	4.20981	2.6784	6.40146	3.15862	5e-05	0.000280515	yes
EVX1	ENSG00000106038	con72	vir72	OK	0.171356	1.09591	2.67707	6.39556	1.85745	5e-05	0.000280515	yes
EPHA2	ENSG00000142627	con72	vir72	OK	12.8582	82.1596	2.67574	6.38966	7.6558	5e-05	0.000280515	yes
TMC7	ENSG00000170537	con72	vir72	OK	1.2787	8.16044	2.67397	6.38183	3.13023	5e-05	0.000280515	yes
EHD4	ENSG00000103966	con72	vir72	OK	11.923	75.7417	2.66734	6.35257	8.72754	5e-05	0.000280515	yes
PRDM11	ENSG00000019485	con72	vir72	OK	1.56002	9.89974	2.66583	6.34592	5.08122	5e-05	0.000280515	yes
DIRAS2	ENSG00000165023	con72	vir72	OK	0.725895	4.59732	2.66296	6.33331	5.57624	5e-05	0.000280515	yes
TDG	ENSG00000139372	con72	vir72	OK	17.6829	111.903	2.66182	6.32831	6.9962	5e-05	0.000280515	yes
NR4A2	ENSG00000153234	con72	vir72	OK	0.495493	3.13402	2.66108	6.32506	3.24554	5e-05	0.000280515	yes
UTP15	ENSG00000164338	con72	vir72	OK	19.7866	125.054	2.65996	6.32016	5.64097	5e-05	0.000280515	yes
MMP1	ENSG00000196611	con72	vir72	OK	1.40646	8.8837	2.65909	6.31635	3.99665	5e-05	0.000280515	yes
CAV1	ENSG00000105974	con72	vir72	OK	0.932045	5.88627	2.65888	6.31543	4.18849	5e-05	0.000280515	yes
BHLHE40	ENSG00000134107	con72	vir72	OK	18.5423	116.788	2.655	6.29846	8.06016	5e-05	0.000280515	yes
DAB2	ENSG00000153071	con72	vir72	OK	7.05188	44.3023	2.6513	6.28233	3.90922	5e-05	0.000280515	yes
CBR3-AS1	ENSG00000236830	con72	vir72	OK	5.88231	36.9429	2.65084	6.28033	3.3376	5e-05	0.000280515	yes
FRMD5	ENSG00000171877	con72	vir72	OK	6.23222	39.1213	2.65014	6.27728	6.67252	5e-05	0.000280515	yes
MAD2L1BP	ENSG00000124688	con72	vir72	OK	52.5413	328.398	2.64392	6.25028	7.079	5e-05	0.000280515	yes
RPL13AP20	ENSG00000234498	con72	vir72	OK	0.452923	2.82836	2.64263	6.24469	2.50444	5e-05	0.000280515	yes
VPS37B	ENSG00000139722	con72	vir72	OK	8.30565	51.8342	2.64174	6.24084	7.49387	5e-05	0.000280515	yes
SMURF1	ENSG00000198742	con72	vir72	OK	8.09868	50.5164	2.64099	6.2376	5.48455	5e-05	0.000280515	yes
NKIRAS1	ENSG00000197885	con72	vir72	OK	8.34804	52.0272	2.63976	6.23228	1.10595	0.0002	0.00102556	yes
JUNB	ENSG00000171223	con72	vir72	OK	2.97778	18.5479	2.63895	6.22878	2.10443	0.00025	0.00125904	yes
TASP1	ENSG00000089123	con72	vir72	OK	13.8772	86.2972	2.6366	6.21864	5.9334	5e-05	0.000280515	yes
PHKG1	ENSG00000164776	con72	vir72	OK	0.309193	1.91463	2.63049	6.19236	1.46555	5e-05	0.000280515	yes
YTHDC1	ENSG00000083896	con72	vir72	OK	37.3853	230.756	2.62583	6.17239	5.48144	5e-05	0.000280515	yes
PGM3	ENSG00000013375	con72	vir72	OK	106.853	657.914	2.62228	6.15722	4.66636	5e-05	0.000280515	yes
GPR89B	ENSG00000188092	con72	vir72	OK	1.04583	6.43815	2.622	6.15603	3.3276	5e-05	0.000280515	yes
XDH	ENSG00000158125	con72	vir72	OK	2.01449	12.2675	2.60636	6.08965	6.51215	5e-05	0.000280515	yes
AC005062.2	ENSG00000243004	con72	vir72	OK	1.1677	7.04192	2.59231	6.03064	0.624592	0.00025	0.00125904	yes
TLR6	ENSG00000174130	con72	vir72	OK	0.233384	1.40531	2.59011	6.02145	1.88805	5e-05	0.000280515	yes
CEP85L	ENSG00000111860	con72	vir72	OK	2.12637	12.7924	2.58882	6.01606	5.0501	5e-05	0.000280515	yes
GK	ENSG00000198814	con72	vir72	OK	1.24787	7.48595	2.58471	5.99895	3.1863	5e-05	0.000280515	yes
RP11-540A21.2	ENSG00000245522	con72	vir72	OK	0.366608	2.19609	2.58263	5.99031	0.988465	0.0155	0.0497309	yes
TTLL7	ENSG00000137941	con72	vir72	OK	1.68625	10.093	2.58146	5.98545	3.22283	5e-05	0.000280515	yes
ADARB1	ENSG00000197381	con72	vir72	OK	9.43172	56.2318	2.57579	5.96197	3.59509	5e-05	0.000280515	yes
SYBU	ENSG00000147642	con72	vir72	OK	0.782248	4.65912	2.57436	5.95607	2.03051	5e-05	0.000280515	yes
ZMYM5	ENSG00000132950	con72	vir72	OK	13.7814	81.9414	2.57187	5.9458	6.93682	5e-05	0.000280515	yes
LAMA2	ENSG00000196569	con72	vir72	OK	0.314652	1.86723	2.56907	5.93427	0.816586	0.01045	0.0354386	yes
REL	ENSG00000162924	con72	vir72	OK	4.5935	27.2576	2.56899	5.93394	7.19326	5e-05	0.000280515	yes
CD83	ENSG00000112149	con72	vir72	OK	1.38125	8.18837	2.5676	5.92822	5.44331	5e-05	0.000280515	yes
PEAR1	ENSG00000187800	con72	vir72	OK	4.19071	24.828	2.5667	5.92453	6.83566	5e-05	0.000280515	yes
NKX3-1	ENSG00000167034	con72	vir72	OK	5.78067	34.1072	2.56077	5.90023	7.40714	5e-05	0.000280515	yes
RP3-449M8.6	ENSG00000259005	con72	vir72	OK	0.4387	2.57975	2.55592	5.88042	2.31346	0.0001	0.000538822	yes
AGPAT9	ENSG00000138678	con72	vir72	OK	11.9083	69.955	2.55446	5.87448	7.70061	5e-05	0.000280515	yes
TRA2B	ENSG00000136527	con72	vir72	OK	112.336	659.519	2.55359	5.87093	6.99323	5e-05	0.000280515	yes
PIK3C3	ENSG00000078142	con72	vir72	OK	22.0574	129.106	2.54922	5.85318	1.31122	5e-05	0.000280515	yes
PSME4	ENSG00000068878	con72	vir72	OK	18.1647	106.119	2.54647	5.84203	5.52944	5e-05	0.000280515	yes
ZEB1	ENSG00000148516	con72	vir72	OK	1.56048	9.1146	2.54619	5.8409	0.904338	0.00035	0.0017153	yes
SMG1P1	ENSG00000237296	con72	vir72	OK	0.537566	3.13939	2.54597	5.84001	0.675875	0.0039	0.0149856	yes
TENM3	ENSG00000218336	con72	vir72	OK	8.6364	50.339	2.54317	5.82868	3.92501	5e-05	0.000280515	yes
FJX1	ENSG00000179431	con72	vir72	OK	0.563618	3.28341	2.5424	5.82557	4.11168	5e-05	0.000280515	yes
EPC1	ENSG00000120616	con72	vir72	OK	14.1214	82.2468	2.54208	5.82428	6.48132	5e-05	0.000280515	yes
ZNF267	ENSG00000185947	con72	vir72	OK	9.92898	57.806	2.5415	5.82194	5.48523	5e-05	0.000280515	yes
PLK3	ENSG00000173846	con72	vir72	OK	6.46954	37.6256	2.53998	5.81581	5.17933	5e-05	0.000280515	yes
TM4SF19	ENSG00000145107	con72	vir72	OK	0.448941	2.60075	2.53433	5.79308	0.609774	0.0028	0.0111735	yes
BRD2	ENSG00000204256	con72	vir72	OK	124.155	718.179	2.5322	5.78453	5.89098	5e-05	0.000280515	yes
ANKHD1-EIF4EBP3	ENSG00000254996	con72	vir72	OK	6.48806	37.4536	2.52925	5.77271	1.88094	5e-05	0.000280515	yes
DNAJC12	ENSG00000108176	con72	vir72	OK	0.38889	2.24378	2.5285	5.76971	1.72982	5e-05	0.000280515	yes
GPR89A	ENSG00000117262	con72	vir72	OK	9.62906	55.1423	2.51769	5.72664	4.69664	5e-05	0.000280515	yes
PIM2	ENSG00000102096	con72	vir72	OK	9.12462	52.2464	2.5175	5.72589	6.98848	5e-05	0.000280515	yes
SLC31A2	ENSG00000136867	con72	vir72	OK	3.14748	18.0004	2.51576	5.71899	3.12725	5e-05	0.000280515	yes
NPR3	ENSG00000113389	con72	vir72	OK	0.186732	1.06772	2.51549	5.71792	1.72896	5e-05	0.000280515	yes
DNAJB1	ENSG00000132002	con72	vir72	OK	49.036	280.195	2.51452	5.71408	6.2789	5e-05	0.000280515	yes
VCPKMT	ENSG00000100483	con72	vir72	OK	5.55375	31.7231	2.514	5.71202	6.18243	5e-05	0.000280515	yes
HPS5	ENSG00000110756	con72	vir72	OK	13.2507	75.4587	2.50961	5.69466	4.53454	5e-05	0.000280515	yes
RP11-61N20.3	ENSG00000226268	con72	vir72	OK	10.9848	62.2868	2.50342	5.67028	6.27675	5e-05	0.000280515	yes
KIF16B	ENSG00000089177	con72	vir72	OK	4.65633	26.3739	2.50185	5.66411	7.69324	5e-05	0.000280515	yes
CPM	ENSG00000135678	con72	vir72	OK	1.35667	7.66414	2.49806	5.64925	0.368211	0.00045	0.00215616	yes
TREML3P	ENSG00000184106	con72	vir72	OK	4.32473	24.4124	2.49694	5.64487	3.73909	5e-05	0.000280515	yes
ABCG2	ENSG00000118777	con72	vir72	OK	2.19817	12.4065	2.49672	5.64401	2.54958	5e-05	0.000280515	yes
MED26	ENSG00000105085	con72	vir72	OK	1.68668	9.51735	2.49638	5.64268	1.42746	0.00465	0.0174982	yes
DUSP8	ENSG00000184545	con72	vir72	OK	2.0415	11.4798	2.49139	5.62319	2.54689	5e-05	0.000280515	yes
CNTD2	ENSG00000105219	con72	vir72	OK	1.64927	9.27335	2.49126	5.62269	3.65616	5e-05	0.000280515	yes
AC009404.2	ENSG00000236255	con72	vir72	OK	1.27178	7.11482	2.48398	5.59439	3.79982	5e-05	0.000280515	yes
PSG4	ENSG00000243137	con72	vir72	OK	0.791114	4.41767	2.48133	5.58412	2.75815	5e-05	0.000280515	yes
CDC37L1	ENSG00000106993	con72	vir72	OK	10.8092	59.95	2.47151	5.54624	7.63763	5e-05	0.000280515	yes
RIMKLB	ENSG00000166532	con72	vir72	OK	2.05385	11.3844	2.47066	5.54297	2.98853	5e-05	0.000280515	yes
OSGIN2	ENSG00000164823	con72	vir72	OK	18.9617	105.076	2.47027	5.54147	6.45666	5e-05	0.000280515	yes
LHX5	ENSG00000089116	con72	vir72	OK	0.187611	1.03193	2.45953	5.50038	2.78125	5e-05	0.000280515	yes
RP11-347C12.2	ENSG00000183604	con72	vir72	OK	0.234487	1.28892	2.45858	5.49675	2.01836	5e-05	0.000280515	yes
RPS6KC1	ENSG00000136643	con72	vir72	OK	10.1151	55.5256	2.45665	5.48941	4.96276	5e-05	0.000280515	yes
SDF2L1	ENSG00000128228	con72	vir72	OK	3.16167	17.3384	2.45521	5.48393	4.89684	5e-05	0.000280515	yes
MCAM	ENSG00000076706	con72	vir72	OK	4.96155	27.2077	2.45515	5.4837	4.38158	5e-05	0.000280515	yes
PREB	ENSG00000138073	con72	vir72	OK	27.4285	149.853	2.4498	5.4634	5.62014	5e-05	0.000280515	yes
GPNMB	ENSG00000136235	con72	vir72	OK	0.848665	4.63558	2.44948	5.46219	2.61472	5e-05	0.000280515	yes
RP11-49C24.1	ENSG00000260023	con72	vir72	OK	1.15891	6.32375	2.44801	5.45663	2.56628	5e-05	0.000280515	yes
SERPINE1	ENSG00000106366	con72	vir72	OK	2.033	11.0851	2.44695	5.45262	5.79925	5e-05	0.000280515	yes
PHLDB2	ENSG00000144824	con72	vir72	OK	0.709271	3.86152	2.44476	5.44435	2.64488	5e-05	0.000280515	yes
JUND	ENSG00000130522	con72	vir72	OK	29.4229	159.374	2.43741	5.41668	7.62867	5e-05	0.000280515	yes
ZNF823	ENSG00000197933	con72	vir72	OK	9.95802	53.9026	2.43642	5.41297	5.5701	5e-05	0.000280515	yes
ATG9B	ENSG00000181652	con72	vir72	OK	0.652471	3.53178	2.43641	5.41293	1.76272	5e-05	0.000280515	yes
RHPN2	ENSG00000131941	con72	vir72	OK	15.1368	81.8687	2.43525	5.40858	7.65102	5e-05	0.000280515	yes
ZC3H12C	ENSG00000149289	con72	vir72	OK	4.20247	22.6173	2.42812	5.38192	7.59684	5e-05	0.000280515	yes
ATP10D	ENSG00000145246	con72	vir72	OK	1.24007	6.67141	2.42757	5.37987	2.41421	5e-05	0.000280515	yes
PARVB	ENSG00000188677	con72	vir72	OK	0.187093	1.00369	2.42349	5.36467	0.480125	0.0007	0.00321832	yes
MAFG	ENSG00000197063	con72	vir72	OK	11.661	62.4717	2.42151	5.35731	7.2111	5e-05	0.000280515	yes
RAB9A	ENSG00000123595	con72	vir72	OK	12.9801	69.5076	2.42087	5.35494	5.81894	5e-05	0.000280515	yes
LARP1B	ENSG00000138709	con72	vir72	OK	23.6322	126.319	2.41824	5.34519	7.63131	5e-05	0.000280515	yes
NXF1	ENSG00000162231	con72	vir72	OK	41.2033	219.682	2.41458	5.33164	3.99706	5e-05	0.000280515	yes
CHD2	ENSG00000173575	con72	vir72	OK	50.4853	268.595	2.41149	5.32024	2.2538	5e-05	0.000280515	yes
DCUN1D3	ENSG00000188215	con72	vir72	OK	11.3496	60.3121	2.40981	5.31404	3.14076	5e-05	0.000280515	yes
ZNF143	ENSG00000166478	con72	vir72	OK	18.2765	96.9862	2.40779	5.30661	4.48756	5e-05	0.000280515	yes
LIF	ENSG00000128342	con72	vir72	OK	3.81875	20.2604	2.40749	5.3055	6.62814	5e-05	0.000280515	yes
PDIA5	ENSG00000065485	con72	vir72	OK	8.88664	47.1432	2.40734	5.30495	3.34109	5e-05	0.000280515	yes
ZNF543	ENSG00000178229	con72	vir72	OK	3.28374	17.4182	2.40718	5.30436	6.57942	5e-05	0.000280515	yes
C1orf162	ENSG00000143110	con72	vir72	OK	0.442319	2.34339	2.40544	5.29797	2.72739	5e-05	0.000280515	yes
LUCAT1,RP11-213H15.4	ENSG00000248323	con72	vir72	OK	2.14982	11.3801	2.40423	5.29353	2.87991	5e-05	0.000280515	yes
EGR2	ENSG00000122877	con72	vir72	OK	1.58661	8.38753	2.40229	5.28642	5.2232	5e-05	0.000280515	yes
MED9	ENSG00000141026	con72	vir72	OK	7.45972	39.4131	2.40148	5.28345	6.56784	5e-05	0.000280515	yes
ADORA2B	ENSG00000170425	con72	vir72	OK	4.44583	23.4784	2.40081	5.281	5.79533	5e-05	0.000280515	yes
UPP1	ENSG00000183696	con72	vir72	OK	6.48613	34.1224	2.39529	5.26083	5.46464	5e-05	0.000280515	yes
KRT81	ENSG00000205426	con72	vir72	OK	0.286646	1.5057	2.3931	5.25285	1.55696	0.0067	0.0241058	yes
TICAM1	ENSG00000127666	con72	vir72	OK	1.88684	9.90442	2.3921	5.24921	5.14472	5e-05	0.000280515	yes
LMCD1	ENSG00000071282	con72	vir72	OK	6.40995	33.5466	2.38778	5.23351	4.50428	5e-05	0.000280515	yes
IL32	ENSG00000008517	con72	vir72	OK	13.4604	70.3428	2.38569	5.22594	6.01984	5e-05	0.000280515	yes
GAS2L3	ENSG00000139354	con72	vir72	OK	35.345	184.537	2.38433	5.22101	5.93324	5e-05	0.000280515	yes
NRARP	ENSG00000198435	con72	vir72	OK	12.8788	67.2028	2.38352	5.21808	7.57068	5e-05	0.000280515	yes
AC017060.1	ENSG00000226598	con72	vir72	OK	0.477786	2.48612	2.37946	5.20342	1.76335	0.00095	0.0042445	yes
TUBB2A	ENSG00000137267	con72	vir72	OK	2.15577	11.1923	2.37623	5.19178	4.97604	5e-05	0.000280515	yes
PFKFB3	ENSG00000170525	con72	vir72	OK	9.55234	49.5482	2.37491	5.18703	6.60672	5e-05	0.000280515	yes
TNFSF9	ENSG00000125657	con72	vir72	OK	4.3149	22.3694	2.37412	5.1842	5.47358	5e-05	0.000280515	yes
LCAT	ENSG00000213398	con72	vir72	OK	4.04981	20.9747	2.37273	5.1792	2.21399	5e-05	0.000280515	yes
TET2	ENSG00000168769	con72	vir72	OK	6.11391	31.6335	2.37129	5.17404	2.59567	5e-05	0.000280515	yes
STAM	ENSG00000136738	con72	vir72	OK	27.3166	141.258	2.37048	5.17113	7.32571	5e-05	0.000280515	yes
LRRC8E	ENSG00000171017	con72	vir72	OK	14.9452	77.1581	2.36813	5.16272	3.49771	5e-05	0.000280515	yes
AC008738.1	ENSG00000230259	con72	vir72	OK	7.20765	37.1973	2.3676	5.16082	6.65624	5e-05	0.000280515	yes
BMS1P4	ENSG00000242338	con72	vir72	OK	0.414768	2.13373	2.363	5.14439	1.5894	0.0024	0.00974437	yes
RHOB	ENSG00000143878	con72	vir72	OK	38.5563	198.152	2.36157	5.13929	8.18796	5e-05	0.000280515	yes
ZNF292	ENSG00000188994	con72	vir72	OK	8.21475	42.2146	2.36145	5.13887	4.15664	5e-05	0.000280515	yes
PIPSL	ENSG00000180764	con72	vir72	OK	9.14816	46.9831	2.36059	5.1358	6.59683	5e-05	0.000280515	yes
PRPF39	ENSG00000185246	con72	vir72	OK	19.1152	98.1523	2.3603	5.13477	4.61381	5e-05	0.000280515	yes
HIVEP2	ENSG00000010818	con72	vir72	OK	4.37262	22.4399	2.3595	5.13192	0.939121	0.001	0.00444512	yes
ZFAND2A	ENSG00000178381	con72	vir72	OK	21.072	107.971	2.35725	5.12393	6.16274	5e-05	0.000280515	yes
ZNF778	ENSG00000170100	con72	vir72	OK	1.84919	9.41844	2.34859	5.09326	4.15738	5e-05	0.000280515	yes
ABHD4	ENSG00000100439	con72	vir72	OK	23.4334	119.048	2.3449	5.08025	3.95177	5e-05	0.000280515	yes
KIAA1432	ENSG00000107036	con72	vir72	OK	9.17065	46.5306	2.34308	5.07385	6.07403	5e-05	0.000280515	yes
PTHLH	ENSG00000087494	con72	vir72	OK	0.387334	1.96354	2.34181	5.06938	2.18254	5e-05	0.000280515	yes
DEDD2	ENSG00000160570	con72	vir72	OK	8.44889	42.8183	2.34139	5.06791	5.18491	5e-05	0.000280515	yes
SNHG17	ENSG00000196756	con72	vir72	OK	21.3227	108.004	2.34062	5.0652	3.8606	5e-05	0.000280515	yes
RP11-314A15.2	ENSG00000230039	con72	vir72	OK	1.30683	6.61174	2.33896	5.05938	4.07748	5e-05	0.000280515	yes
MUL1	ENSG00000090432	con72	vir72	OK	7.37655	37.3114	2.3386	5.05812	6.73075	5e-05	0.000280515	yes
CTA-941F9.9	ENSG00000238120	con72	vir72	OK	1.56293	7.90065	2.33771	5.055	3.07483	5e-05	0.000280515	yes
ARHGAP10	ENSG00000071205	con72	vir72	OK	4.81351	24.3135	2.3366	5.05111	5.23806	5e-05	0.000280515	yes
DNAJB4	ENSG00000162616	con72	vir72	OK	27.632	139.216	2.33291	5.03821	5.40571	5e-05	0.000280515	yes
IKBKG	ENSG00000073009	con72	vir72	OK	0.990664	4.98439	2.33095	5.03137	1.38778	5e-05	0.000280515	yes
ZFP36	ENSG00000128016	con72	vir72	OK	22.4691	112.911	2.32918	5.0252	6.97887	5e-05	0.000280515	yes
INTS6	ENSG00000102786	con72	vir72	OK	22.1474	110.902	2.32408	5.00746	4.79835	5e-05	0.000280515	yes
DHDH	ENSG00000104808	con72	vir72	OK	1.45542	7.28568	2.32363	5.0059	3.39961	5e-05	0.000280515	yes
PTBP2	ENSG00000117569	con72	vir72	OK	12.451	62.1848	2.3203	4.99436	5.11033	5e-05	0.000280515	yes
CDKN2AIP	ENSG00000168564	con72	vir72	OK	15.1259	75.5262	2.31995	4.99315	7.22368	5e-05	0.000280515	yes
BRF2	ENSG00000104221	con72	vir72	OK	5.87557	29.2306	2.31468	4.97494	4.78417	5e-05	0.000280515	yes
PRKCE	ENSG00000171132	con72	vir72	OK	1.79332	8.91849	2.31417	4.97318	3.64623	5e-05	0.000280515	yes
MICA	ENSG00000204520	con72	vir72	OK	9.85449	48.8872	2.3106	4.96089	3.75021	5e-05	0.000280515	yes
SH3RF1	ENSG00000154447	con72	vir72	OK	13.1224	65.0708	2.30998	4.95876	7.68341	5e-05	0.000280515	yes
NRBF2P3	ENSG00000237415	con72	vir72	OK	0.519784	2.57525	2.30873	4.95447	2.91033	5e-05	0.000280515	yes
UAP1	ENSG00000117143	con72	vir72	OK	24.3401	120.294	2.30515	4.94219	7.466	5e-05	0.000280515	yes
ABTB2	ENSG00000166016	con72	vir72	OK	2.50356	12.3095	2.29771	4.91677	5.60531	5e-05	0.000280515	yes
PDXDC2P	ENSG00000196696	con72	vir72	OK	2.13868	10.5089	2.29682	4.91373	4.27531	5e-05	0.000280515	yes
TBC1D22B	ENSG00000065491	con72	vir72	OK	11.6743	57.1274	2.29084	4.89341	7.35079	5e-05	0.000280515	yes
MURC	ENSG00000170681	con72	vir72	OK	0.246482	1.20547	2.29004	4.8907	3.35663	5e-05	0.000280515	yes
GABARAPL1	ENSG00000139112	con72	vir72	OK	26.6782	130.439	2.28965	4.88937	6.61966	5e-05	0.000280515	yes
ZSWIM4	ENSG00000132003	con72	vir72	OK	1.00251	4.89914	2.28892	4.8869	4.56433	5e-05	0.000280515	yes
THUMPD2	ENSG00000138050	con72	vir72	OK	10.6848	52.165	2.28753	4.8822	5.6768	5e-05	0.000280515	yes
CITED2	ENSG00000164442	con72	vir72	OK	5.71799	27.9007	2.28672	4.87945	5.81123	5e-05	0.000280515	yes
ZIC5	ENSG00000139800	con72	vir72	OK	0.562141	2.73507	2.28258	4.86547	4.41204	5e-05	0.000280515	yes
PXDC1	ENSG00000168994	con72	vir72	OK	11.4395	55.6358	2.28198	4.86345	5.9956	5e-05	0.000280515	yes
ZBTB5	ENSG00000168795	con72	vir72	OK	12.8413	62.4526	2.28197	4.86342	7.63645	5e-05	0.000280515	yes
RP11-1217F2.1	ENSG00000235095	con72	vir72	OK	1.04356	5.06136	2.278	4.85005	4.20782	5e-05	0.000280515	yes
OSER1	ENSG00000132823	con72	vir72	OK	58.8346	285.152	2.277	4.84669	7.72397	5e-05	0.000280515	yes
COG3	ENSG00000136152	con72	vir72	OK	24.8928	120.467	2.27484	4.83944	6.58674	5e-05	0.000280515	yes
PPP1R15B	ENSG00000158615	con72	vir72	OK	47.4442	229.586	2.27473	4.83907	6.3935	5e-05	0.000280515	yes
MSH6	ENSG00000116062	con72	vir72	OK	3.36599	16.2726	2.27334	4.83441	2.74623	5e-05	0.000280515	yes
PTPRR	ENSG00000153233	con72	vir72	OK	3.25305	15.6205	2.26358	4.80182	4.924	5e-05	0.000280515	yes
C2orf54	ENSG00000172478	con72	vir72	OK	1.62842	7.80583	2.26108	4.7935	3.21224	5e-05	0.000280515	yes
C3orf35	ENSG00000198590	con72	vir72	OK	0.373099	1.78834	2.261	4.79324	2.79949	5e-05	0.000280515	yes
NFXL1	ENSG00000170448	con72	vir72	OK	18.5182	88.6403	2.25902	4.78666	5.0856	5e-05	0.000280515	yes
ZNF430	ENSG00000118620	con72	vir72	OK	22.1557	106.034	2.25878	4.78587	3.63219	5e-05	0.000280515	yes
CYP27B1	ENSG00000111012	con72	vir72	OK	1.20352	5.73872	2.25347	4.76828	1.40172	5e-05	0.000280515	yes
LINS	ENSG00000140471	con72	vir72	OK	16.5172	78.7477	2.25327	4.76762	3.44194	5e-05	0.000280515	yes
BACH1	ENSG00000156273	con72	vir72	OK	35.4745	169.059	2.25267	4.76564	5.41377	5e-05	0.000280515	yes
C1orf109	ENSG00000116922	con72	vir72	OK	22.4234	106.695	2.25042	4.75821	6.04088	5e-05	0.000280515	yes
SLC36A4	ENSG00000180773	con72	vir72	OK	3.85551	18.3314	2.24932	4.75459	4.0627	5e-05	0.000280515	yes
CCNJ	ENSG00000107443	con72	vir72	OK	5.2733	25.0463	2.24782	4.74965	5.3308	5e-05	0.000280515	yes
TMED7-TICAM2	ENSG00000251201	con72	vir72	OK	3.32428	15.7634	2.24546	4.74188	1.65302	0.0016	0.00678703	yes
LARP1BP1	ENSG00000231442	con72	vir72	OK	1.6285	7.72049	2.24515	4.74086	4.47619	5e-05	0.000280515	yes
AC025335.1	ENSG00000179859	con72	vir72	OK	6.90399	32.7171	2.24454	4.73886	6.30915	5e-05	0.000280515	yes
RHOV	ENSG00000104140	con72	vir72	OK	3.01674	14.2888	2.24382	4.7365	5.14853	5e-05	0.000280515	yes
HIC2	ENSG00000169635	con72	vir72	OK	1.65702	7.84025	2.24231	4.73154	5.91358	5e-05	0.000280515	yes
PPP3CC	ENSG00000120910	con72	vir72	OK	7.54369	35.6811	2.24182	4.72993	3.18562	5e-05	0.000280515	yes
TXNDC11	ENSG00000153066	con72	vir72	OK	17.9666	84.8797	2.2401	4.7243	2.86527	5e-05	0.000280515	yes
HSD17B7P2	ENSG00000099251	con72	vir72	OK	3.20738	15.1383	2.23874	4.71985	4.61051	5e-05	0.000280515	yes
SIAH2	ENSG00000181788	con72	vir72	OK	17.789	83.9112	2.23788	4.71703	7.09996	5e-05	0.000280515	yes
C16orf91	ENSG00000174109	con72	vir72	OK	3.90648	18.4172	2.23711	4.71452	4.66586	5e-05	0.000280515	yes
HSPA1B	ENSG00000204388	con72	vir72	OK	6.80209	32.0087	2.23441	4.7057	6.60844	5e-05	0.000280515	yes
MIR4435-1HG	ENSG00000172965	con72	vir72	OK	53.0861	249.723	2.23392	4.7041	5.68803	5e-05	0.000280515	yes
AQP3	ENSG00000165272	con72	vir72	OK	21.5939	101.537	2.23332	4.70215	6.95682	5e-05	0.000280515	yes
ELF3	ENSG00000163435	con72	vir72	OK	51.9838	244.269	2.23234	4.69896	4.99959	5e-05	0.000280515	yes
NEDD4L	ENSG00000049759	con72	vir72	OK	69.0264	324.105	2.23124	4.69537	1.39192	5e-05	0.000280515	yes
MCPH1	ENSG00000147316	con72	vir72	OK	18.7705	87.7707	2.22527	4.67598	6.91511	5e-05	0.000280515	yes
GEMIN8P4	ENSG00000228175	con72	vir72	OK	0.414258	1.93519	2.22388	4.67148	2.18681	0.00375	0.0144764	yes
LYSMD3	ENSG00000176018	con72	vir72	OK	26.2772	122.64	2.22255	4.66718	6.19901	5e-05	0.000280515	yes
SNIP1	ENSG00000163877	con72	vir72	OK	9.24407	43.1329	2.22219	4.66601	6.87576	5e-05	0.000280515	yes
SLC35B1	ENSG00000121073	con72	vir72	OK	31.3949	146.004	2.21741	4.65058	3.92212	5e-05	0.000280515	yes
PHLDA2	ENSG00000181649	con72	vir72	OK	9.93969	46.1492	2.21503	4.64291	4.78021	5e-05	0.000280515	yes
NFKBIZ	ENSG00000144802	con72	vir72	OK	7.00157	32.3273	2.20701	4.61717	3.15822	5e-05	0.000280515	yes
CSF1	ENSG00000184371	con72	vir72	OK	3.0411	14.0277	2.20562	4.61273	2.89867	5e-05	0.000280515	yes
MFSD9	ENSG00000135953	con72	vir72	OK	9.92672	45.6747	2.20201	4.6012	3.10867	5e-05	0.000280515	yes
MTF1	ENSG00000188786	con72	vir72	OK	7.70719	35.4551	2.20172	4.60027	6.81708	5e-05	0.000280515	yes
RP1-232L22		con72	vir72	OK	3.95865	18.1972	2.20064	4.59683	5.05303	5e-05	0.000280515	yes
ATP8B3	ENSG00000130270	con72	vir72	OK	1.46346	6.72215	2.19954	4.59333	3.66071	5e-05	0.000280515	yes
SBSN	ENSG00000189001	con72	vir72	OK	0.305463	1.40255	2.19898	4.59155	2.32431	5e-05	0.000280515	yes
ALYREF	ENSG00000183684	con72	vir72	OK	14.0446	64.4629	2.19845	4.58986	1.8139	5e-05	0.000280515	yes
MPZL3	ENSG00000160588	con72	vir72	OK	32.0945	147.279	2.19816	4.58894	5.94436	5e-05	0.000280515	yes
YOD1	ENSG00000180667	con72	vir72	OK	12.8977	59.1646	2.19761	4.58719	3.98964	5e-05	0.000280515	yes
ZNF431	ENSG00000196705	con72	vir72	OK	10.9423	50.1754	2.19706	4.58544	3.73166	5e-05	0.000280515	yes
SPSB1	ENSG00000171621	con72	vir72	OK	4.26593	19.4564	2.18931	4.56087	5.95387	5e-05	0.000280515	yes
UBAP1	ENSG00000165006	con72	vir72	OK	31.4167	143.151	2.18794	4.55654	7.17067	5e-05	0.000280515	yes
PTPN21	ENSG00000070778	con72	vir72	OK	4.00424	18.2346	2.18708	4.55383	3.82963	5e-05	0.000280515	yes
RP5-1159O4.2	ENSG00000272732	con72	vir72	OK	0.256726	1.16864	2.18652	4.55206	2.44674	5e-05	0.000280515	yes
IER2	ENSG00000160888	con72	vir72	OK	23.1487	105.369	2.18645	4.55184	7.12705	5e-05	0.000280515	yes
CD274	ENSG00000120217	con72	vir72	OK	0.499201	2.26739	2.18334	4.54204	2.28732	5e-05	0.000280515	yes
PPAPDC1B	ENSG00000147535	con72	vir72	OK	20.8524	94.6127	2.18182	4.53726	2.34851	5e-05	0.000280515	yes
LYST	ENSG00000143669	con72	vir72	OK	4.45965	20.2023	2.17952	4.53003	2.09916	5e-05	0.000280515	yes
INTS6P1	ENSG00000250492	con72	vir72	OK	3.55716	16.1118	2.17932	4.5294	5.48716	5e-05	0.000280515	yes
DIMT1	ENSG00000086189	con72	vir72	OK	12.4123	56.2067	2.17897	4.5283	2.83639	5e-05	0.000280515	yes
FUT1	ENSG00000174951	con72	vir72	OK	12.0705	54.5664	2.17653	4.52065	5.30138	5e-05	0.000280515	yes
TINAGL1	ENSG00000142910	con72	vir72	OK	22.9848	103.798	2.17502	4.51592	5.46216	5e-05	0.000280515	yes
ADIPOR2	ENSG00000006831	con72	vir72	OK	70.1369	316.354	2.1733	4.51054	6.51485	5e-05	0.000280515	yes
FAM83G	ENSG00000188522	con72	vir72	OK	7.19989	32.4302	2.17129	4.50426	6.04589	5e-05	0.000280515	yes
CDC25A	ENSG00000164045	con72	vir72	OK	5.32441	23.9693	2.17049	4.50176	5.58535	5e-05	0.000280515	yes
NFKB1	ENSG00000109320	con72	vir72	OK	11.163	50.2386	2.17007	4.50045	4.12655	5e-05	0.000280515	yes
IL4R	ENSG00000077238	con72	vir72	OK	7.23435	32.3858	2.16243	4.47668	3.37242	5e-05	0.000280515	yes
TMED9	ENSG00000184840	con72	vir72	OK	56.7863	253.848	2.16035	4.47023	7.44098	5e-05	0.000280515	yes
ACBD3	ENSG00000182827	con72	vir72	OK	22.8931	102.268	2.15937	4.4672	4.77667	5e-05	0.000280515	yes
SLC25A32	ENSG00000164933	con72	vir72	OK	17.0756	76.2669	2.15912	4.46642	4.56812	5e-05	0.000280515	yes
EGR1	ENSG00000120738	con72	vir72	OK	86.3804	385.741	2.15886	4.46562	7.2724	5e-05	0.000280515	yes
GOLGA4	ENSG00000144674	con72	vir72	OK	17.956	80.1613	2.15844	4.46432	4.50481	5e-05	0.000280515	yes
MVK	ENSG00000110921	con72	vir72	OK	8.11934	36.1858	2.15599	4.45674	3.52672	5e-05	0.000280515	yes
PPAP2B	ENSG00000162407	con72	vir72	OK	6.62992	29.5371	2.15546	4.45511	3.68928	5e-05	0.000280515	yes
DYRK1B	ENSG00000105204	con72	vir72	OK	0.479111	2.13353	2.15481	4.4531	1.41344	5e-05	0.000280515	yes
STK40	ENSG00000196182	con72	vir72	OK	21.2674	94.6488	2.15394	4.45042	4.91714	5e-05	0.000280515	yes
SLC22A3	ENSG00000146477	con72	vir72	OK	0.638497	2.84127	2.15378	4.44992	3.8283	5e-05	0.000280515	yes
KLF4	ENSG00000136826	con72	vir72	OK	8.11357	36.0893	2.15316	4.44801	6.31916	5e-05	0.000280515	yes
KIAA0226	ENSG00000145016	con72	vir72	OK	6.41601	28.4615	2.14927	4.43603	2.74605	5e-05	0.000280515	yes
LAMA1	ENSG00000101680	con72	vir72	OK	0.661375	2.93316	2.14892	4.43496	1.86888	5e-05	0.000280515	yes
KDM6B	ENSG00000132510	con72	vir72	OK	11.7073	51.9179	2.14882	4.43465	1.54748	0.00025	0.00125904	yes
HIST1H2BN	ENSG00000233822	con72	vir72	OK	3.85292	17.0751	2.14787	4.43173	3.28572	5e-05	0.000280515	yes
PTPRH	ENSG00000080031	con72	vir72	OK	4.63645	20.4934	2.14406	4.42004	2.93303	5e-05	0.000280515	yes
TOX4	ENSG00000092203	con72	vir72	OK	45.2204	199.722	2.14295	4.41664	3.6558	5e-05	0.000280515	yes
ZNF57	ENSG00000171970	con72	vir72	OK	8.83129	38.9861	2.14227	4.41456	6.13103	5e-05	0.000280515	yes
PARD6B	ENSG00000124171	con72	vir72	OK	27.4217	120.969	2.14124	4.41141	7.12706	5e-05	0.000280515	yes
GOSR2,RP11-156P1.2	ENSG00000108433	con72	vir72	OK	23.6883	104.4	2.13987	4.40722	5.79403	5e-05	0.000280515	yes
RP11-756P10.3	ENSG00000180015	con72	vir72	OK	4.93914	21.7109	2.13609	4.39569	4.91764	5e-05	0.000280515	yes
NKAIN1	ENSG00000084628	con72	vir72	OK	0.266096	1.16836	2.13447	4.39076	1.56197	5e-05	0.000280515	yes
NFIL3	ENSG00000165030	con72	vir72	OK	8.37725	36.7742	2.13415	4.38978	6.23365	5e-05	0.000280515	yes
DLL4	ENSG00000128917	con72	vir72	OK	0.270799	1.18768	2.13285	4.38583	2.70374	5e-05	0.000280515	yes
RP11-37B2.1	ENSG00000251136	con72	vir72	OK	2.82193	12.3354	2.12805	4.37126	3.29198	5e-05	0.000280515	yes
PAK1IP1	ENSG00000111845	con72	vir72	OK	21.5949	94.2725	2.12615	4.36551	6.6081	5e-05	0.000280515	yes
LSMEM1	ENSG00000181016	con72	vir72	OK	1.12355	4.89571	2.12345	4.35735	0.692595	0.0071	0.0253539	yes
KLHL29	ENSG00000119771	con72	vir72	OK	0.929783	4.0498	2.12288	4.35563	4.64018	5e-05	0.000280515	yes
C16orf72	ENSG00000182831	con72	vir72	OK	10.4189	45.3432	2.12169	4.35203	3.65619	5e-05	0.000280515	yes
RP11-553L6.5	ENSG00000259976	con72	vir72	OK	1.30702	5.68677	2.12132	4.35092	3.75171	5e-05	0.000280515	yes
PCSK5	ENSG00000099139	con72	vir72	OK	0.298273	1.29716	2.12066	4.34893	2.39432	5e-05	0.000280515	yes
ZNF274	ENSG00000171606	con72	vir72	OK	0.693095	3.01325	2.12019	4.34751	1.73758	5e-05	0.000280515	yes
CRELD2	ENSG00000184164	con72	vir72	OK	8.14451	35.3757	2.11886	4.34351	4.68136	5e-05	0.000280515	yes
ZNF10	ENSG00000256223	con72	vir72	OK	8.53562	37.0622	2.11838	4.34206	2.20913	5e-05	0.000280515	yes
HMGXB3	ENSG00000113716	con72	vir72	OK	12.4346	53.9564	2.11744	4.33923	3.76381	5e-05	0.000280515	yes
CNOT4	ENSG00000080802	con72	vir72	OK	12.2532	53.1185	2.11606	4.33508	6.15195	5e-05	0.000280515	yes
PSPC1	ENSG00000121390	con72	vir72	OK	35.219	152.53	2.11467	4.33091	4.8161	5e-05	0.000280515	yes
PLAUR	ENSG00000011422	con72	vir72	OK	5.97728	25.8765	2.11408	4.32914	4.45213	5e-05	0.000280515	yes
MAP3K8	ENSG00000107968	con72	vir72	OK	4.78907	20.682	2.11056	4.31859	4.20736	5e-05	0.000280515	yes
RAPGEF2	ENSG00000109756	con72	vir72	OK	23.483	101.012	2.10484	4.3015	3.72399	5e-05	0.000280515	yes
IRGQ	ENSG00000167378	con72	vir72	OK	5.15074	22.1319	2.10327	4.29682	4.69231	5e-05	0.000280515	yes
RP5-837I24.1	ENSG00000227288	con72	vir72	OK	0.395893	1.70075	2.10299	4.29599	3.02556	5e-05	0.000280515	yes
GPR115	ENSG00000153294	con72	vir72	OK	5.35056	22.9379	2.09997	4.287	5.84525	5e-05	0.000280515	yes
SLC25A33	ENSG00000171612	con72	vir72	OK	2.42133	10.362	2.09743	4.27946	5.23912	5e-05	0.000280515	yes
BMP2	ENSG00000125845	con72	vir72	OK	0.612844	2.61867	2.09524	4.27297	4.02405	5e-05	0.000280515	yes
RP11-1348G14.4	ENSG00000251417	con72	vir72	OK	0.26323	1.12406	2.09432	4.27025	1.6808	0.0025	0.0101054	yes
HERPUD1	ENSG00000051108	con72	vir72	OK	268.428	1146.05	2.09406	4.26948	5.31514	5e-05	0.000280515	yes
TXNRD1	ENSG00000198431	con72	vir72	OK	216.18	922.746	2.0937	4.26841	2.59193	5e-05	0.000280515	yes
MTRF1L	ENSG00000112031	con72	vir72	OK	2.39325	10.2045	2.09216	4.26386	3.53175	5e-05	0.000280515	yes
OVOL1	ENSG00000172818	con72	vir72	OK	6.29159	26.8239	2.09202	4.26345	5.93712	5e-05	0.000280515	yes
IGFN1	ENSG00000163395	con72	vir72	OK	0.401155	1.70925	2.09113	4.26082	3.98076	5e-05	0.000280515	yes
PLCXD2	ENSG00000240891	con72	vir72	OK	1.0686	4.55188	2.09074	4.25967	1.48389	5e-05	0.000280515	yes
NFKB2	ENSG00000077150	con72	vir72	OK	18.3261	78.0518	2.09053	4.25905	4.39994	5e-05	0.000280515	yes
RP11-597G23.1	ENSG00000270304	con72	vir72	OK	0.260105	1.10737	2.08997	4.25739	1.83296	0.00045	0.00215616	yes
CDKL1	ENSG00000100490	con72	vir72	OK	4.84027	20.5864	2.08853	4.25314	0.996135	0.00045	0.00215616	yes
BYSL	ENSG00000112578	con72	vir72	OK	11.5793	49.2159	2.08758	4.25035	5.53832	5e-05	0.000280515	yes
ALKBH1	ENSG00000100601	con72	vir72	OK	8.21113	34.8356	2.08491	4.24249	5.56935	5e-05	0.000280515	yes
SRSF3	ENSG00000112081	con72	vir72	OK	250.399	1062.1	2.08462	4.24163	6.02945	5e-05	0.000280515	yes
SPTY2D1	ENSG00000179119	con72	vir72	OK	19.598	83.1161	2.08442	4.24105	5.35274	5e-05	0.000280515	yes
PPP1R13B	ENSG00000088808	con72	vir72	OK	5.12021	21.7016	2.08353	4.23843	3.61038	5e-05	0.000280515	yes
RP11-1277A3.1	ENSG00000247679	con72	vir72	OK	0.907006	3.83362	2.07952	4.22667	3.12697	5e-05	0.000280515	yes
PER1	ENSG00000179094	con72	vir72	OK	9.17124	38.7115	2.07757	4.22096	2.25801	5e-05	0.000280515	yes
R3HDM4	ENSG00000198858	con72	vir72	OK	15.0007	63.1698	2.07421	4.21114	5.57492	5e-05	0.000280515	yes
XBP1	ENSG00000100219	con72	vir72	OK	164.217	691.24	2.07358	4.2093	7.0082	5e-05	0.000280515	yes
CCDC9	ENSG00000105321	con72	vir72	OK	12.5733	52.8225	2.07079	4.20117	2.34401	5e-05	0.000280515	yes
LRP8	ENSG00000157193	con72	vir72	OK	6.55632	27.5138	2.0692	4.19654	3.66964	5e-05	0.000280515	yes
PLD6	ENSG00000179598	con72	vir72	OK	5.17951	21.7135	2.0677	4.19218	1.68633	0.0009	0.00404232	yes
ENTPD7	ENSG00000198018	con72	vir72	OK	5.83067	24.4077	2.0656	4.18608	3.19267	5e-05	0.000280515	yes
ZNF79	ENSG00000196152	con72	vir72	OK	2.51469	10.5217	2.06492	4.18411	4.89085	5e-05	0.000280515	yes
FOXA3	ENSG00000170608	con72	vir72	OK	10.2326	42.7998	2.06443	4.18269	6.08833	5e-05	0.000280515	yes
NLRC5	ENSG00000140853	con72	vir72	OK	7.64461	31.9616	2.06383	4.18095	2.71544	5e-05	0.000280515	yes
LATS2	ENSG00000150457	con72	vir72	OK	10.8046	45.152	2.06315	4.17898	6.70083	5e-05	0.000280515	yes
ARFIP2	ENSG00000132254	con72	vir72	OK	33.7023	140.551	2.06017	4.17035	6.39505	5e-05	0.000280515	yes
ZNF140	ENSG00000196387	con72	vir72	OK	16.3756	68.288	2.06009	4.17012	5.48258	5e-05	0.000280515	yes
GCLM	ENSG00000023909	con72	vir72	OK	8.08939	33.7326	2.06004	4.16998	5.79747	5e-05	0.000280515	yes
BCL10	ENSG00000142867	con72	vir72	OK	15.2463	63.55	2.05943	4.16822	3.69614	5e-05	0.000280515	yes
THEMIS2	ENSG00000130775	con72	vir72	OK	2.51852	10.4899	2.05835	4.1651	3.58799	5e-05	0.000280515	yes
SLC2A3	ENSG00000059804	con72	vir72	OK	25.5224	106.137	2.05608	4.15855	3.71094	5e-05	0.000280515	yes
TSC22D3	ENSG00000157514	con72	vir72	OK	30.0338	124.833	2.05534	4.15642	6.82372	5e-05	0.000280515	yes
CADPS2	ENSG00000081803	con72	vir72	OK	5.44453	22.628	2.05523	4.1561	4.88007	5e-05	0.000280515	yes
TNKS2	ENSG00000107854	con72	vir72	OK	30.5249	126.734	2.05375	4.15184	6.55528	5e-05	0.000280515	yes
DDIT4	ENSG00000168209	con72	vir72	OK	273.871	1133.73	2.04951	4.13965	6.41343	5e-05	0.000280515	yes
HELQ	ENSG00000163312	con72	vir72	OK	8.6851	35.9175	2.04807	4.13552	4.7297	5e-05	0.000280515	yes
PIM1	ENSG00000137193	con72	vir72	OK	17.3035	71.3663	2.04418	4.12439	6.20802	5e-05	0.000280515	yes
CASP7	ENSG00000165806	con72	vir72	OK	16.4661	67.8957	2.04382	4.12336	6.26229	5e-05	0.000280515	yes
ST7	ENSG00000004866	con72	vir72	OK	16.8071	69.2213	2.04215	4.11859	3.81254	5e-05	0.000280515	yes
MYO7A	ENSG00000137474	con72	vir72	OK	0.260524	1.07213	2.04099	4.11528	1.55544	5e-05	0.000280515	yes
CPEB2	ENSG00000137449	con72	vir72	OK	0.688309	2.8317	2.04054	4.11399	2.60123	5e-05	0.000280515	yes
DYRK3	ENSG00000143479	con72	vir72	OK	3.95324	16.2623	2.04042	4.11365	5.05976	5e-05	0.000280515	yes
ALG2	ENSG00000119523	con72	vir72	OK	33.2152	136.534	2.03935	4.1106	6.40775	5e-05	0.000280515	yes
PLEKHM1	ENSG00000225190	con72	vir72	OK	5.84307	24.0096	2.03881	4.10906	2.97755	5e-05	0.000280515	yes
MYLIP	ENSG00000007944	con72	vir72	OK	7.59664	31.2118	2.03866	4.10864	5.74119	5e-05	0.000280515	yes
BDKRB2	ENSG00000168398	con72	vir72	OK	4.08599	16.7172	2.03258	4.09136	5.73232	5e-05	0.000280515	yes
EP400NL	ENSG00000185684	con72	vir72	OK	1.59429	6.51299	2.03041	4.08521	3.56701	5e-05	0.000280515	yes
RCAN1	ENSG00000159200	con72	vir72	OK	7.6115	31.0667	2.02912	4.08156	5.58485	5e-05	0.000280515	yes
SLTM	ENSG00000137776	con72	vir72	OK	40.4829	165.151	2.0284	4.07952	3.4499	5e-05	0.000280515	yes
DDX26B	ENSG00000165359	con72	vir72	OK	3.49903	14.2726	2.02822	4.07901	4.80254	5e-05	0.000280515	yes
ANKHD1,ANKHD1-EIF4EBP3	ENSG00000131503	con72	vir72	OK	58.0302	236.206	2.02517	4.0704	3.25157	5e-05	0.000280515	yes
ZSCAN21	ENSG00000166529	con72	vir72	OK	8.42882	34.2778	2.02387	4.06673	2.84925	5e-05	0.000280515	yes
PRPF4	ENSG00000136875	con72	vir72	OK	31.475	127.965	2.02347	4.0656	4.57852	5e-05	0.000280515	yes
TRIM36	ENSG00000152503	con72	vir72	OK	1.06321	4.32056	2.0228	4.06372	3.20734	5e-05	0.000280515	yes
ZSWIM6	ENSG00000130449	con72	vir72	OK	7.00359	28.4388	2.02169	4.06059	6.34629	5e-05	0.000280515	yes
ZNF562	ENSG00000171466	con72	vir72	OK	36.1824	146.919	2.02166	4.06051	3.56239	5e-05	0.000280515	yes
RP11-320M2.1	ENSG00000257135	con72	vir72	OK	0.713634	2.89725	2.02143	4.05986	2.25603	5e-05	0.000280515	yes
MXD1	ENSG00000059728	con72	vir72	OK	7.53919	30.5927	2.02071	4.05783	5.20242	5e-05	0.000280515	yes
NMT2	ENSG00000152465	con72	vir72	OK	13.1068	52.9829	2.01522	4.04242	4.44266	5e-05	0.000280515	yes
TUBA1A	ENSG00000167552	con72	vir72	OK	12.3761	49.9879	2.01403	4.03909	2.13969	5e-05	0.000280515	yes
PNRC1	ENSG00000146278	con72	vir72	OK	41.3969	167.166	2.01369	4.03814	5.47324	5e-05	0.000280515	yes
ARHGAP29	ENSG00000137962	con72	vir72	OK	21.8081	87.9259	2.01142	4.03179	6.77627	5e-05	0.000280515	yes
HBEGF	ENSG00000113070	con72	vir72	OK	6.89881	27.7892	2.0101	4.0281	5.32199	5e-05	0.000280515	yes
AKAP8	ENSG00000105127	con72	vir72	OK	4.8941	19.7083	2.00969	4.02696	2.87531	5e-05	0.000280515	yes
KCNK5	ENSG00000164626	con72	vir72	OK	5.8747	23.6398	2.00863	4.024	5.91399	5e-05	0.000280515	yes
AKIRIN2	ENSG00000135334	con72	vir72	OK	41.9474	168.717	2.00795	4.0221	3.75275	5e-05	0.000280515	yes
SUCO	ENSG00000094975	con72	vir72	OK	29.7457	119.505	2.00632	4.01756	5.98112	5e-05	0.000280515	yes
JPH1	ENSG00000104369	con72	vir72	OK	4.79746	19.2516	2.00463	4.01286	4.85405	5e-05	0.000280515	yes
STX3	ENSG00000166900	con72	vir72	OK	60.8113	244.022	2.0046	4.01277	6.14606	5e-05	0.000280515	yes
FOSL2	ENSG00000075426	con72	vir72	OK	17.0001	68.1894	2.00401	4.01113	6.72895	5e-05	0.000280515	yes
SLC25A13	ENSG00000004864	con72	vir72	OK	15.6654	62.8221	2.00369	4.01024	5.13644	5e-05	0.000280515	yes
THAP9-AS1	ENSG00000251022	con72	vir72	OK	73.8083	295.714	2.00235	4.00652	3.13105	5e-05	0.000280515	yes
DCUN1D2	ENSG00000150401	con72	vir72	OK	18.9475	75.8561	2.00126	4.00349	4.03516	5e-05	0.000280515	yes
NRBF2	ENSG00000148572	con72	vir72	OK	10.1964	40.8202	2.00122	4.00338	5.64134	5e-05	0.000280515	yes
RP11-294O2.2	ENSG00000248771	con72	vir72	OK	0.374961	1.49891	1.9991	3.99751	2.68377	5e-05	0.000280515	yes
CIDECP	ENSG00000186162	con72	vir72	OK	4.60765	18.3944	1.99717	3.99216	4.02651	5e-05	0.000280515	yes
CCND2	ENSG00000118971	con72	vir72	OK	0.441578	1.76223	1.99667	3.99078	2.35867	5e-05	0.000280515	yes
ICAM1	ENSG00000090339	con72	vir72	OK	15.2584	60.8783	1.99633	3.98984	5.10358	5e-05	0.000280515	yes
ZNF850	ENSG00000267041	con72	vir72	OK	12.5149	49.8992	1.99537	3.98718	2.1412	5e-05	0.000280515	yes
GS1-124K5.12	ENSG00000232559	con72	vir72	OK	3.89877	15.5296	1.99393	3.98321	3.41514	5e-05	0.000280515	yes
NAMPT	ENSG00000105835	con72	vir72	OK	52.648	209.644	1.99349	3.98199	3.72611	5e-05	0.000280515	yes
GMPPA	ENSG00000144591	con72	vir72	OK	48.8522	194.421	1.99269	3.97978	5.93072	5e-05	0.000280515	yes
HEG1	ENSG00000173706	con72	vir72	OK	1.45735	5.79509	1.99149	3.97647	2.96576	5e-05	0.000280515	yes
CTD-2267D19.6	ENSG00000270145	con72	vir72	OK	0.717004	2.85112	1.99147	3.97642	2.90956	5e-05	0.000280515	yes
SEC61A2	ENSG00000065665	con72	vir72	OK	4.1198	16.3815	1.99142	3.97628	1.13145	0.00015	0.000786087	yes
TFAP2E	ENSG00000116819	con72	vir72	OK	0.328481	1.3051	1.99028	3.97314	2.6734	5e-05	0.000280515	yes
NECAP1	ENSG00000089818	con72	vir72	OK	53.572	212.708	1.98932	3.9705	4.60513	5e-05	0.000280515	yes
B3GNT5	ENSG00000176597	con72	vir72	OK	11.0312	43.7731	1.98846	3.96813	5.74508	5e-05	0.000280515	yes
MAP4K5	ENSG00000012983	con72	vir72	OK	15.4269	61.1782	1.98757	3.96568	2.90596	5e-05	0.000280515	yes
STON2	ENSG00000140022	con72	vir72	OK	2.51739	9.96724	1.98526	3.95934	2.65572	5e-05	0.000280515	yes
TIMM10B	ENSG00000132286	con72	vir72	OK	25.1517	99.4841	1.98381	3.95536	5.68903	5e-05	0.000280515	yes
JOSD1	ENSG00000100221	con72	vir72	OK	66.7074	263.532	1.98206	3.95057	4.95305	5e-05	0.000280515	yes
NFX1	ENSG00000086102	con72	vir72	OK	22.2739	87.9702	1.98166	3.94947	6.67432	5e-05	0.000280515	yes
AC104135.4	ENSG00000230836	con72	vir72	OK	0.307006	1.212	1.98105	3.9478	2.31551	5e-05	0.000280515	yes
COQ10A	ENSG00000135469	con72	vir72	OK	4.17309	16.4693	1.98059	3.94654	3.58061	5e-05	0.000280515	yes
KDM5B	ENSG00000117139	con72	vir72	OK	9.81949	38.7468	1.98036	3.94592	5.04467	5e-05	0.000280515	yes
RFPL3S	ENSG00000205853	con72	vir72	OK	1.19332	4.70253	1.97846	3.94072	2.04655	5e-05	0.000280515	yes
FBXO42	ENSG00000037637	con72	vir72	OK	9.1033	35.8499	1.97751	3.93813	3.9143	5e-05	0.000280515	yes
ZDHHC18	ENSG00000204160	con72	vir72	OK	11.8203	46.546	1.97739	3.9378	3.73849	5e-05	0.000280515	yes
PSMD11	ENSG00000108671	con72	vir72	OK	41.379	162.779	1.97595	3.93387	5.14044	5e-05	0.000280515	yes
RP11-22P4.1	ENSG00000255322	con72	vir72	OK	0.37171	1.46107	1.97477	3.93066	1.59799	0.00225	0.00920323	yes
EXOC8	ENSG00000116903	con72	vir72	OK	8.86111	34.8181	1.97428	3.92932	5.41366	5e-05	0.000280515	yes
MIOS	ENSG00000164654	con72	vir72	OK	18.6522	73.2576	1.97364	3.92758	4.30098	5e-05	0.000280515	yes
ARL4D	ENSG00000175906	con72	vir72	OK	3.8912	15.2702	1.97244	3.92431	4.55023	5e-05	0.000280515	yes
NOP2	ENSG00000111641	con72	vir72	OK	32.8815	128.94	1.97135	3.92135	4.57756	5e-05	0.000280515	yes
SEC23B	ENSG00000101310	con72	vir72	OK	100.787	394.976	1.97045	3.9189	5.09191	5e-05	0.000280515	yes
MAP2K3	ENSG00000034152	con72	vir72	OK	7.29757	28.5907	1.97006	3.91784	4.66496	5e-05	0.000280515	yes
TAF4B	ENSG00000141384	con72	vir72	OK	5.16579	20.237	1.96994	3.91752	5.46812	5e-05	0.000280515	yes
SNX11	ENSG00000002919	con72	vir72	OK	22.9134	89.4246	1.96448	3.90272	4.92142	5e-05	0.000280515	yes
CLU	ENSG00000120885	con72	vir72	OK	65.6435	256.08	1.96387	3.90107	4.36199	5e-05	0.000280515	yes
TOX4P1	ENSG00000248697	con72	vir72	OK	1.70119	6.63316	1.96315	3.89912	3.97878	5e-05	0.000280515	yes
RAB12	ENSG00000206418	con72	vir72	OK	10.8568	42.3054	1.96225	3.89669	4.41233	5e-05	0.000280515	yes
RP11-325P15.1	ENSG00000225603	con72	vir72	OK	0.832727	3.23946	1.95984	3.89019	2.33309	5e-05	0.000280515	yes
VCP	ENSG00000165280	con72	vir72	OK	83.3716	324.208	1.95929	3.88871	5.89766	5e-05	0.000280515	yes
KRT80	ENSG00000167767	con72	vir72	OK	17.7683	69.0941	1.95926	3.88862	6.55973	5e-05	0.000280515	yes
TMEFF1	ENSG00000241697	con72	vir72	OK	2.02632	7.86944	1.9574	3.88361	2.41717	5e-05	0.000280515	yes
ARHGAP23	ENSG00000225485	con72	vir72	OK	4.91161	19.0344	1.95434	3.87539	2.33263	5e-05	0.000280515	yes
DNTTIP2	ENSG00000067334	con72	vir72	OK	40.732	157.765	1.95354	3.87324	3.49657	5e-05	0.000280515	yes
RELL1	ENSG00000181826	con72	vir72	OK	5.0945	19.7196	1.95262	3.87077	3.43058	5e-05	0.000280515	yes
FBXO30	ENSG00000118496	con72	vir72	OK	7.92561	30.6677	1.95213	3.86945	6.46758	5e-05	0.000280515	yes
PANX2	ENSG00000073150	con72	vir72	OK	0.850078	3.28838	1.95171	3.86833	3.56317	5e-05	0.000280515	yes
ZNF697	ENSG00000143067	con72	vir72	OK	5.30376	20.5024	1.9507	3.86562	5.80632	5e-05	0.000280515	yes
PIGA	ENSG00000165195	con72	vir72	OK	9.1302	35.2514	1.94896	3.86096	3.55901	5e-05	0.000280515	yes
ZNF527	ENSG00000189164	con72	vir72	OK	9.14898	35.2691	1.94672	3.85497	3.91579	5e-05	0.000280515	yes
MITF	ENSG00000187098	con72	vir72	OK	3.36014	12.9487	1.94622	3.85364	3.35931	5e-05	0.000280515	yes
SRP19	ENSG00000153037	con72	vir72	OK	28.9718	111.583	1.9454	3.85145	2.69837	5e-05	0.000280515	yes
FAM43A	ENSG00000185112	con72	vir72	OK	2.18226	8.40458	1.94535	3.85131	4.48702	5e-05	0.000280515	yes
LITAF	ENSG00000189067	con72	vir72	OK	58.3623	224.631	1.94445	3.84891	4.40548	5e-05	0.000280515	yes
ZNF35	ENSG00000169981	con72	vir72	OK	9.84151	37.8414	1.94301	3.84507	2.48526	5e-05	0.000280515	yes
ARID4A	ENSG00000032219	con72	vir72	OK	4.67419	17.9702	1.94282	3.84456	3.29058	5e-05	0.000280515	yes
NTN4	ENSG00000074527	con72	vir72	OK	3.27919	12.6014	1.94217	3.84283	4.17967	5e-05	0.000280515	yes
ZNF503	ENSG00000165655	con72	vir72	OK	1.3472	5.17692	1.94213	3.84273	3.77175	5e-05	0.000280515	yes
MEF2D	ENSG00000116604	con72	vir72	OK	7.95896	30.5773	1.94181	3.84187	5.71742	5e-05	0.000280515	yes
GNA13	ENSG00000120063	con72	vir72	OK	28.9834	111.245	1.94044	3.83823	6.75677	5e-05	0.000280515	yes
TMEM55B	ENSG00000165782	con72	vir72	OK	21.0513	80.7892	1.94025	3.83772	2.12279	5e-05	0.000280515	yes
POFUT2	ENSG00000186866	con72	vir72	OK	17.9495	68.8582	1.93968	3.83621	3.53951	5e-05	0.000280515	yes
WWC2	ENSG00000151718	con72	vir72	OK	5.24159	20.0987	1.93903	3.83448	4.41547	5e-05	0.000280515	yes
DNAJC3	ENSG00000102580	con72	vir72	OK	49.5355	189.912	1.93879	3.83384	6.62528	5e-05	0.000280515	yes
KLHL21	ENSG00000162413	con72	vir72	OK	5.28593	20.2653	1.93878	3.83381	2.78027	5e-05	0.000280515	yes
PHLDA1	ENSG00000139289	con72	vir72	OK	23.7626	91.089	1.93859	3.83331	6.72988	5e-05	0.000280515	yes
ETV3	ENSG00000117036	con72	vir72	OK	22.735	87.1286	1.93823	3.83235	6.50031	5e-05	0.000280515	yes
AGO3	ENSG00000126070	con72	vir72	OK	5.63549	21.5757	1.9368	3.82856	2.79328	5e-05	0.000280515	yes
FAM46C	ENSG00000183508	con72	vir72	OK	1.82246	6.97432	1.93616	3.82686	4.91174	5e-05	0.000280515	yes
NUS1P1	ENSG00000235636	con72	vir72	OK	19.8742	76.0466	1.93598	3.82638	5.44906	5e-05	0.000280515	yes
DNHD1	ENSG00000179532	con72	vir72	OK	3.89119	14.878	1.93489	3.82349	2.10121	5e-05	0.000280515	yes
EPSTI1	ENSG00000133106	con72	vir72	OK	0.287561	1.09858	1.93371	3.82036	1.27844	5e-05	0.000280515	yes
CDK11B	ENSG00000248333	con72	vir72	OK	5.47164	20.8993	1.93341	3.81957	1.87426	5e-05	0.000280515	yes
CSRNP2	ENSG00000110925	con72	vir72	OK	12.2504	46.7277	1.93145	3.81438	4.57781	5e-05	0.000280515	yes
C18orf8	ENSG00000141452	con72	vir72	OK	9.21397	35.1282	1.93074	3.81251	1.74796	5e-05	0.000280515	yes
FXR2	ENSG00000129245	con72	vir72	OK	14.2542	54.2358	1.92786	3.8049	1.39863	5e-05	0.000280515	yes
LETM2	ENSG00000165046	con72	vir72	OK	1.70992	6.50047	1.92661	3.80161	2.38955	5e-05	0.000280515	yes
CHST7	ENSG00000147119	con72	vir72	OK	0.674021	2.55907	1.92476	3.79674	3.30876	5e-05	0.000280515	yes
RP11-389K14.3	ENSG00000231107	con72	vir72	OK	5.31078	20.1633	1.92473	3.79666	4.04876	5e-05	0.000280515	yes
TTC4P1	ENSG00000221971	con72	vir72	OK	0.625648	2.37525	1.92465	3.79645	2.73704	5e-05	0.000280515	yes
NTMT1	ENSG00000148335	con72	vir72	OK	15.1534	57.5195	1.92441	3.79582	4.59743	5e-05	0.000280515	yes
PCOLCE2	ENSG00000163710	con72	vir72	OK	0.848186	3.21945	1.92436	3.79568	0.972083	0.00065	0.00300853	yes
C19orf44	ENSG00000105072	con72	vir72	OK	2.38686	9.05607	1.92377	3.79413	0.957676	0.0099	0.0338151	yes
SCFD1	ENSG00000092108	con72	vir72	OK	41.4814	157.269	1.9227	3.79132	5.221	5e-05	0.000280515	yes
C11orf68	ENSG00000175573	con72	vir72	OK	4.13924	15.6745	1.92098	3.7868	4.24945	5e-05	0.000280515	yes
TMEM183A	ENSG00000163444	con72	vir72	OK	7.55107	28.5864	1.92058	3.78575	3.79329	5e-05	0.000280515	yes
MIR31HG	ENSG00000171889	con72	vir72	OK	0.567597	2.14714	1.91948	3.78287	2.30915	5e-05	0.000280515	yes
MPP3	ENSG00000161647	con72	vir72	OK	2.98018	11.2611	1.91787	3.77865	2.99313	5e-05	0.000280515	yes
PRSS22	ENSG00000005001	con72	vir72	OK	4.83965	18.2795	1.91725	3.77702	3.34528	5e-05	0.000280515	yes
RWDD2A	ENSG00000013392	con72	vir72	OK	5.59572	21.1164	1.91597	3.77367	1.61512	0.0003	0.00148912	yes
COQ10B	ENSG00000115520	con72	vir72	OK	24.4998	92.2195	1.9123	3.76409	5.72639	5e-05	0.000280515	yes
NUDT17	ENSG00000186364	con72	vir72	OK	1.22374	4.59067	1.90741	3.75135	1.23455	0.00195	0.0080971	yes
NR4A1	ENSG00000123358	con72	vir72	OK	10.4183	38.9925	1.90408	3.7427	3.9769	5e-05	0.000280515	yes
IFITM10	ENSG00000244242	con72	vir72	OK	0.640214	2.3937	1.90261	3.73889	1.38965	0.001	0.00444512	yes
ZNF473	ENSG00000142528	con72	vir72	OK	9.9343	37.014	1.89758	3.72588	4.05863	5e-05	0.000280515	yes
MIR4458HG	ENSG00000247516	con72	vir72	OK	11.5707	43.0507	1.89556	3.72066	4.52138	5e-05	0.000280515	yes
RNF25	ENSG00000163481	con72	vir72	OK	19.8348	73.7716	1.89503	3.7193	3.44107	5e-05	0.000280515	yes
SNRK	ENSG00000163788	con72	vir72	OK	7.27394	27.0533	1.89499	3.71919	3.87542	5e-05	0.000280515	yes
NANS	ENSG00000095380	con72	vir72	OK	22.78	84.6593	1.8939	3.71639	4.52263	5e-05	0.000280515	yes
SDC4	ENSG00000124145	con72	vir72	OK	77.538	287.488	1.89053	3.70771	6.58499	5e-05	0.000280515	yes
RAB32	ENSG00000118508	con72	vir72	OK	9.52604	35.2429	1.88738	3.69963	5.04818	5e-05	0.000280515	yes
PCF11	ENSG00000165494	con72	vir72	OK	16.9783	62.7769	1.88654	3.69747	3.14728	5e-05	0.000280515	yes
TADA2B	ENSG00000173011	con72	vir72	OK	7.69602	28.4331	1.88539	3.69453	3.06693	5e-05	0.000280515	yes
GOLGA5	ENSG00000066455	con72	vir72	OK	20.2639	74.84	1.8849	3.69327	6.20135	5e-05	0.000280515	yes
SAP30BP	ENSG00000161526	con72	vir72	OK	42.6938	157.573	1.88392	3.69077	4.3419	5e-05	0.000280515	yes
SLC12A4	ENSG00000124067	con72	vir72	OK	12.7376	47.0001	1.88357	3.68987	3.44135	5e-05	0.000280515	yes
SLC19A2	ENSG00000117479	con72	vir72	OK	16.8704	62.2165	1.8828	3.6879	6.08009	5e-05	0.000280515	yes
UGCG	ENSG00000148154	con72	vir72	OK	32.331	119.122	1.88145	3.68445	6.27997	5e-05	0.000280515	yes
ZSCAN22	ENSG00000182318	con72	vir72	OK	2.27111	8.36606	1.88115	3.68369	4.79053	5e-05	0.000280515	yes
ZNF133	ENSG00000125846	con72	vir72	OK	9.14448	33.6809	1.88096	3.6832	2.13833	5e-05	0.000280515	yes
B4GALT5	ENSG00000158470	con72	vir72	OK	43.7024	160.747	1.87901	3.67823	6.60044	5e-05	0.000280515	yes
DHX34	ENSG00000134815	con72	vir72	OK	2.72011	10.0025	1.87862	3.67723	4.66438	5e-05	0.000280515	yes
PMAIP1	ENSG00000141682	con72	vir72	OK	24.8267	91.1128	1.87576	3.66995	5.90255	5e-05	0.000280515	yes
CEP85	ENSG00000130695	con72	vir72	OK	14.0817	51.6584	1.87518	3.66847	5.07998	5e-05	0.000280515	yes
SOX30	ENSG00000039600	con72	vir72	OK	0.466974	1.71171	1.87402	3.66553	2.70325	5e-05	0.000280515	yes
TBL2	ENSG00000106638	con72	vir72	OK	26.2268	96.074	1.8731	3.66319	4.75071	5e-05	0.000280515	yes
ARRDC2	ENSG00000105643	con72	vir72	OK	6.54801	23.9727	1.87227	3.66108	4.01993	5e-05	0.000280515	yes
UTP6	ENSG00000108651	con72	vir72	OK	34.7273	126.938	1.86999	3.6553	4.37261	5e-05	0.000280515	yes
ACTR3B	ENSG00000133627	con72	vir72	OK	7.49873	27.3683	1.86779	3.64973	4.55427	5e-05	0.000280515	yes
AC026806.2	ENSG00000268913	con72	vir72	OK	1.71664	6.26525	1.86779	3.64973	2.19309	5e-05	0.000280515	yes
EAF2	ENSG00000145088	con72	vir72	OK	3.59355	13.1137	1.86759	3.64922	3.70426	5e-05	0.000280515	yes
BHLHE41	ENSG00000123095	con72	vir72	OK	0.921228	3.36135	1.86741	3.64877	0.775424	0.01145	0.0383718	yes
EIF2S1	ENSG00000134001	con72	vir72	OK	154.613	564.027	1.8671	3.64799	2.95727	5e-05	0.000280515	yes
SEC14L2	ENSG00000100003	con72	vir72	OK	4.81458	17.5552	1.86642	3.64627	1.54764	5e-05	0.000280515	yes
SH3BP5	ENSG00000131370	con72	vir72	OK	11.4225	41.6107	1.86508	3.64288	5.07197	5e-05	0.000280515	yes
RNMT	ENSG00000101654	con72	vir72	OK	29.8176	108.594	1.86471	3.64195	2.98653	5e-05	0.000280515	yes
THAP1	ENSG00000131931	con72	vir72	OK	16.464	59.9115	1.86352	3.63894	5.61441	5e-05	0.000280515	yes
NPIPB3	ENSG00000169246	con72	vir72	OK	2.76866	10.0729	1.86322	3.63819	2.95868	5e-05	0.000280515	yes
BTBD10	ENSG00000148925	con72	vir72	OK	16.4186	59.6322	1.86076	3.63199	5.68299	5e-05	0.000280515	yes
ARHGAP17	ENSG00000140750	con72	vir72	OK	13.2632	48.0607	1.85743	3.62362	3.89268	5e-05	0.000280515	yes
FKBP11	ENSG00000134285	con72	vir72	OK	14.3049	51.7715	1.85565	3.61915	1.33828	0.00065	0.00300853	yes
PITHD1	ENSG00000057757	con72	vir72	OK	17.5591	63.4945	1.85441	3.61604	5.24457	5e-05	0.000280515	yes
RP11-849F2.8	ENSG00000269928	con72	vir72	OK	0.474598	1.71542	1.85378	3.61446	1.89655	0.00025	0.00125904	yes
ZNF239	ENSG00000196793	con72	vir72	OK	19.1462	69.1316	1.85229	3.61073	3.98463	5e-05	0.000280515	yes
SAFB2	ENSG00000130254	con72	vir72	OK	14.4567	52.1623	1.85127	3.60818	2.28644	5e-05	0.000280515	yes
IER5	ENSG00000162783	con72	vir72	OK	13.3161	48.0343	1.8509	3.60725	5.76893	5e-05	0.000280515	yes
C4orf32	ENSG00000174749	con72	vir72	OK	2.18612	7.87166	1.8483	3.60076	4.99512	5e-05	0.000280515	yes
SNHG16	ENSG00000163597	con72	vir72	OK	82.443	296.771	1.84788	3.59971	5.1953	5e-05	0.000280515	yes
ZNF410	ENSG00000119725	con72	vir72	OK	52.2558	187.966	1.84681	3.59704	2.67293	5e-05	0.000280515	yes
SMAD3	ENSG00000166949	con72	vir72	OK	10.5179	37.8003	1.84556	3.59392	5.03203	5e-05	0.000280515	yes
LMO7	ENSG00000136153	con72	vir72	OK	47.5932	170.968	1.8449	3.59228	3.15647	5e-05	0.000280515	yes
ZNF844	ENSG00000223547	con72	vir72	OK	0.802091	2.88063	1.84455	3.59141	3.05092	5e-05	0.000280515	yes
CLP1	ENSG00000172409	con72	vir72	OK	24.0499	86.2811	1.84302	3.5876	4.11846	5e-05	0.000280515	yes
ATAD2B	ENSG00000119778	con72	vir72	OK	3.50917	12.5886	1.84292	3.58735	2.85453	5e-05	0.000280515	yes
P2RX4	ENSG00000135124	con72	vir72	OK	15.9038	57.0361	1.84251	3.58633	4.97459	5e-05	0.000280515	yes
GNPDA1	ENSG00000113552	con72	vir72	OK	151.939	544.889	1.84247	3.58623	3.29609	5e-05	0.000280515	yes
CWC25	ENSG00000108296	con72	vir72	OK	9.1039	32.6281	1.84156	3.58397	4.63985	5e-05	0.000280515	yes
TES	ENSG00000135269	con72	vir72	OK	77.3259	276.884	1.84026	3.58075	5.75858	5e-05	0.000280515	yes
CCNL1	ENSG00000163660	con72	vir72	OK	30.7718	110.139	1.83964	3.57921	4.47629	5e-05	0.000280515	yes
NECAP1P1	ENSG00000178503	con72	vir72	OK	0.539286	1.92926	1.83892	3.57742	2.18926	5e-05	0.000280515	yes
AKR1B15	ENSG00000227471	con72	vir72	OK	0.290668	1.03928	1.83815	3.57551	2.33039	5e-05	0.000280515	yes
PELO	ENSG00000152684	con72	vir72	OK	6.09793	21.8027	1.83812	3.57544	1.93291	0.0001	0.000538822	yes
METRNL	ENSG00000176845	con72	vir72	OK	3.84943	13.7574	1.83749	3.57388	3.89465	5e-05	0.000280515	yes
IRF1	ENSG00000125347	con72	vir72	OK	3.89591	13.9232	1.83746	3.5738	4.45002	5e-05	0.000280515	yes
NPIPB5	ENSG00000243716	con72	vir72	OK	1.89574	6.77124	1.83666	3.57182	1.45544	5e-05	0.000280515	yes
IGFL4	ENSG00000204869	con72	vir72	OK	3.33233	11.8937	1.83559	3.56917	2.60835	5e-05	0.000280515	yes
HSP90B1	ENSG00000166598	con72	vir72	OK	373.574	1333.31	1.83554	3.56905	5.78733	5e-05	0.000280515	yes
GRWD1	ENSG00000105447	con72	vir72	OK	8.0753	28.7966	1.83431	3.56601	2.71338	5e-05	0.000280515	yes
TJAP1	ENSG00000137221	con72	vir72	OK	10.4702	37.3334	1.83417	3.56566	4.42613	5e-05	0.000280515	yes
RP11-24B19.3	ENSG00000270101	con72	vir72	OK	8.70284	30.9882	1.83216	3.5607	1.29993	0.0029	0.0115239	yes
YY1AP1	ENSG00000163374	con72	vir72	OK	18.8523	67.111	1.83181	3.55983	2.86724	5e-05	0.000280515	yes
AP006216.11	ENSG00000231611	con72	vir72	OK	1.93375	6.87837	1.83067	3.55702	2.46562	5e-05	0.000280515	yes
CEBPB	ENSG00000172216	con72	vir72	OK	17.1528	60.9626	1.82948	3.55409	5.56671	5e-05	0.000280515	yes
ISG20	ENSG00000172183	con72	vir72	OK	6.3849	22.672	1.82818	3.55089	2.57568	5e-05	0.000280515	yes
TIMM23B	ENSG00000204152	con72	vir72	OK	0.88722	3.14993	1.82796	3.55035	2.07638	5e-05	0.000280515	yes
TMEM198	ENSG00000188760	con72	vir72	OK	0.407367	1.44588	1.82754	3.54931	0.936767	0.0124	0.0410665	yes
WDR75	ENSG00000115368	con72	vir72	OK	77.4523	274.8	1.827	3.54799	3.76673	5e-05	0.000280515	yes
TMEM136	ENSG00000181264	con72	vir72	OK	6.99516	24.8138	1.82672	3.5473	3.46952	5e-05	0.000280515	yes
ZRANB1	ENSG00000019995	con72	vir72	OK	16.1529	57.2724	1.82605	3.54565	4.2352	5e-05	0.000280515	yes
NPIPB15	ENSG00000196436	con72	vir72	OK	0.59954	2.12453	1.82522	3.54361	2.73716	5e-05	0.000280515	yes
RNF10	ENSG00000022840	con72	vir72	OK	70.6382	250.109	1.82404	3.54071	3.64772	5e-05	0.000280515	yes
ZNF805	ENSG00000204524	con72	vir72	OK	3.14084	11.1117	1.82285	3.53779	4.39054	5e-05	0.000280515	yes
RP11-21L23.2	ENSG00000261578	con72	vir72	OK	2.12144	7.49898	1.82165	3.53485	4.36963	5e-05	0.000280515	yes
COLQ	ENSG00000206561	con72	vir72	OK	0.674362	2.38328	1.82135	3.53412	0.456707	0.0137	0.0447294	yes
RNF122	ENSG00000133874	con72	vir72	OK	2.03075	7.17375	1.82072	3.53257	3.74453	5e-05	0.000280515	yes
ADPRHL2	ENSG00000116863	con72	vir72	OK	5.61118	19.7856	1.81808	3.52612	4.59869	5e-05	0.000280515	yes
NOXRED1	ENSG00000165555	con72	vir72	OK	0.352691	1.2432	1.81757	3.52487	2.0589	5e-05	0.000280515	yes
TERF2IP	ENSG00000166848	con72	vir72	OK	22.9894	81.032	1.81752	3.52475	2.73528	5e-05	0.000280515	yes
CBWD5	ENSG00000147996	con72	vir72	OK	29.0792	102.449	1.81685	3.52311	4.66479	5e-05	0.000280515	yes
UBC	ENSG00000150991	con72	vir72	OK	463.223	1631.74	1.81664	3.5226	3.48998	5e-05	0.000280515	yes
RP11-63E5.6	ENSG00000249868	con72	vir72	OK	0.398808	1.40482	1.81662	3.52255	1.82662	0.00015	0.000786087	yes
ZNF561	ENSG00000171469	con72	vir72	OK	57.1074	200.908	1.81479	3.51808	2.89081	5e-05	0.000280515	yes
RIPK2	ENSG00000104312	con72	vir72	OK	5.10625	17.9597	1.81443	3.51721	4.57881	5e-05	0.000280515	yes
ANKRD17	ENSG00000132466	con72	vir72	OK	23.4394	82.4356	1.81433	3.51696	3.88249	5e-05	0.000280515	yes
RASAL2	ENSG00000075391	con72	vir72	OK	4.12454	14.5047	1.81421	3.51667	1.61679	5e-05	0.000280515	yes
FNDC3B	ENSG00000075420	con72	vir72	OK	31.2257	109.79	1.81394	3.51601	2.83929	5e-05	0.000280515	yes
ARL14	ENSG00000179674	con72	vir72	OK	2.95849	10.401	1.81378	3.51562	3.7513	5e-05	0.000280515	yes
GTF2E1	ENSG00000153767	con72	vir72	OK	18.9126	66.4666	1.81328	3.5144	2.53345	5e-05	0.000280515	yes
ZNF416	ENSG00000083817	con72	vir72	OK	5.41315	19.0219	1.81313	3.51404	4.94123	5e-05	0.000280515	yes
SLC35E1	ENSG00000127526	con72	vir72	OK	20.2589	71.1594	1.8125	3.5125	2.28626	5e-05	0.000280515	yes
TRIM16	ENSG00000221926	con72	vir72	OK	25.8983	90.963	1.81242	3.51231	3.77715	5e-05	0.000280515	yes
NANOS1	ENSG00000188613	con72	vir72	OK	2.4054	8.44505	1.81183	3.51087	2.87154	5e-05	0.000280515	yes
KEAP1	ENSG00000079999	con72	vir72	OK	14.7664	51.8425	1.81182	3.51085	3.61519	5e-05	0.000280515	yes
NOMO2	ENSG00000185164	con72	vir72	OK	1.5937	5.59218	1.81103	3.50893	3.14018	5e-05	0.000280515	yes
RP11-347C12.1	ENSG00000198064	con72	vir72	OK	0.791411	2.7761	1.81056	3.50778	2.61151	5e-05	0.000280515	yes
ARAP2	ENSG00000047365	con72	vir72	OK	4.70543	16.5013	1.81018	3.50686	2.29853	5e-05	0.000280515	yes
SRP72	ENSG00000174780	con72	vir72	OK	118.664	415.892	1.80932	3.50477	4.78945	5e-05	0.000280515	yes
RP11-465B22.3	ENSG00000217801	con72	vir72	OK	12.6876	44.4671	1.80932	3.50477	3.84232	5e-05	0.000280515	yes
RIC8B	ENSG00000111785	con72	vir72	OK	5.7595	20.1848	1.80925	3.5046	3.14933	5e-05	0.000280515	yes
LAMA3	ENSG00000053747	con72	vir72	OK	4.75404	16.6533	1.80858	3.50297	3.19214	5e-05	0.000280515	yes
KIAA0513	ENSG00000135709	con72	vir72	OK	4.65584	16.2939	1.80722	3.49967	3.28721	5e-05	0.000280515	yes
TMEM214	ENSG00000119777	con72	vir72	OK	31.5907	110.525	1.8068	3.49865	3.37586	5e-05	0.000280515	yes
USP12PY	ENSG00000232927	con72	vir72	OK	0.874809	3.05901	1.80603	3.49679	2.64517	5e-05	0.000280515	yes
IBTK	ENSG00000005700	con72	vir72	OK	46.2991	161.865	1.80574	3.49608	6.1628	5e-05	0.000280515	yes
CTD-2369P2.2	ENSG00000175898	con72	vir72	OK	3.05131	10.6572	1.80433	3.49267	1.78683	0.00015	0.000786087	yes
ZNF184	ENSG00000096654	con72	vir72	OK	10.2394	35.7603	1.80423	3.49243	5.5699	5e-05	0.000280515	yes
PPM1D	ENSG00000170836	con72	vir72	OK	6.99508	24.4171	1.80348	3.49061	5.24996	5e-05	0.000280515	yes
ACOXL	ENSG00000153093	con72	vir72	OK	0.676688	2.36026	1.80239	3.48798	0.961718	0.0013	0.00562895	yes
SYNJ1	ENSG00000159082	con72	vir72	OK	3.40561	11.8776	1.80226	3.48766	3.64079	5e-05	0.000280515	yes
FOCAD	ENSG00000188352	con72	vir72	OK	41.0856	143.282	1.80216	3.48742	2.8799	5e-05	0.000280515	yes
EFNA1	ENSG00000169242	con72	vir72	OK	19.1184	66.6559	1.80177	3.48648	4.42033	5e-05	0.000280515	yes
C6orf106	ENSG00000196821	con72	vir72	OK	41.1132	143.251	1.80087	3.4843	6.19207	5e-05	0.000280515	yes
ATG16L1	ENSG00000085978	con72	vir72	OK	10.9006	37.9532	1.79981	3.48174	4.24967	5e-05	0.000280515	yes
ATAT1	ENSG00000137343	con72	vir72	OK	4.78946	16.6676	1.79911	3.48005	3.56142	5e-05	0.000280515	yes
UBE2O	ENSG00000175931	con72	vir72	OK	8.08857	28.1279	1.79804	3.47747	2.68596	5e-05	0.000280515	yes
PDGFA	ENSG00000197461	con72	vir72	OK	4.8269	16.7748	1.79713	3.47528	4.37707	5e-05	0.000280515	yes
AL645728.2	ENSG00000215791	con72	vir72	OK	3.14797	10.9225	1.7948	3.46967	1.62968	0.0004	0.00193713	yes
ERF	ENSG00000105722	con72	vir72	OK	15.5713	54.0217	1.79465	3.46931	3.9221	5e-05	0.000280515	yes
HSP90B2P	ENSG00000259706	con72	vir72	OK	28.4494	98.6032	1.79324	3.46592	5.49079	5e-05	0.000280515	yes
C2orf42	ENSG00000115998	con72	vir72	OK	14.1611	49.044	1.79215	3.46331	1.93468	5e-05	0.000280515	yes
USP12	ENSG00000152484	con72	vir72	OK	27.133	93.9504	1.79185	3.46259	6.22812	5e-05	0.000280515	yes
RP11-544M22.13	ENSG00000270149	con72	vir72	OK	13.4832	46.6588	1.79099	3.46052	1.52113	0.00075	0.00342499	yes
RP11-115J23.1	ENSG00000249867	con72	vir72	OK	0.301256	1.04244	1.7909	3.46031	1.60098	0.001	0.00444512	yes
KIRREL	ENSG00000183853	con72	vir72	OK	7.26117	25.0886	1.78876	3.45518	5.71237	5e-05	0.000280515	yes
FOXO3	ENSG00000118689	con72	vir72	OK	6.16842	21.2842	1.78681	3.45051	5.74389	5e-05	0.000280515	yes
NRBF2P4	ENSG00000253228	con72	vir72	OK	0.638821	2.20334	1.78621	3.44908	2.32625	5e-05	0.000280515	yes
ESYT3	ENSG00000158220	con72	vir72	OK	2.29877	7.92723	1.78596	3.44848	2.25756	5e-05	0.000280515	yes
CBWD2	ENSG00000136682	con72	vir72	OK	10.8612	37.4418	1.78547	3.44731	3.38793	5e-05	0.000280515	yes
PNO1	ENSG00000115946	con72	vir72	OK	21.1685	72.9617	1.78522	3.44671	3.13716	5e-05	0.000280515	yes
CTR9	ENSG00000198730	con72	vir72	OK	24.1061	82.8544	1.78118	3.43707	4.98446	5e-05	0.000280515	yes
ELL2	ENSG00000118985	con72	vir72	OK	3.72183	12.7849	1.78036	3.43512	1.20673	0.0001	0.000538822	yes
LINC01128	ENSG00000228794	con72	vir72	OK	5.48243	18.83	1.78014	3.4346	2.28964	5e-05	0.000280515	yes
ITSN1	ENSG00000205726	con72	vir72	OK	12.6612	43.4619	1.77934	3.43269	0.69913	5e-05	0.000280515	yes
MGAT5	ENSG00000152127	con72	vir72	OK	12.7062	43.5981	1.77874	3.43126	2.53678	5e-05	0.000280515	yes
CDC6	ENSG00000094804	con72	vir72	OK	13.0834	44.8858	1.77853	3.43076	4.43329	5e-05	0.000280515	yes
TUSC2	ENSG00000114383	con72	vir72	OK	11.1654	38.2927	1.77803	3.42958	3.28911	5e-05	0.000280515	yes
FKBP14	ENSG00000106080	con72	vir72	OK	26.6578	91.3186	1.77635	3.42558	2.09304	5e-05	0.000280515	yes
PBX4	ENSG00000105717	con72	vir72	OK	1.79306	6.14057	1.77595	3.42463	2.18521	5e-05	0.000280515	yes
ZKSCAN5	ENSG00000196652	con72	vir72	OK	6.37995	21.8383	1.77524	3.42295	5.48644	5e-05	0.000280515	yes
ARID3A	ENSG00000116017	con72	vir72	OK	1.76696	6.04409	1.77426	3.42063	2.39235	5e-05	0.000280515	yes
SLC7A11	ENSG00000151012	con72	vir72	OK	77.5418	264.68	1.7712	3.41338	3.41199	5e-05	0.000280515	yes
NET1	ENSG00000173848	con72	vir72	OK	65.0182	221.909	1.77105	3.41302	4.15879	5e-05	0.000280515	yes
TPST1	ENSG00000169902	con72	vir72	OK	8.56801	29.2321	1.77052	3.41177	3.30919	5e-05	0.000280515	yes
ZNF286A	ENSG00000187607	con72	vir72	OK	8.99123	30.6761	1.77052	3.41177	2.48195	5e-05	0.000280515	yes
SOGA2	ENSG00000168502	con72	vir72	OK	0.822929	2.79653	1.7648	3.39827	1.00761	0.00045	0.00215616	yes
TIFA	ENSG00000145365	con72	vir72	OK	9.6186	32.618	1.76177	3.39114	2.77434	5e-05	0.000280515	yes
RLF	ENSG00000117000	con72	vir72	OK	12.4894	42.3263	1.76086	3.389	5.98656	5e-05	0.000280515	yes
ISL2	ENSG00000159556	con72	vir72	OK	1.01328	3.43241	1.76019	3.38743	2.92254	5e-05	0.000280515	yes
ARID4B	ENSG00000054267	con72	vir72	OK	11.6431	39.4239	1.7596	3.38604	1.61417	5e-05	0.000280515	yes
SPAG1	ENSG00000104450	con72	vir72	OK	3.56318	12.0519	1.75802	3.38234	2.4203	5e-05	0.000280515	yes
NT5C2	ENSG00000076685	con72	vir72	OK	269.154	910.135	1.75765	3.38147	2.22408	5e-05	0.000280515	yes
TBC1D20	ENSG00000125875	con72	vir72	OK	18.1954	61.4444	1.75571	3.37692	5.80504	5e-05	0.000280515	yes
PRPF38AP1	ENSG00000225053	con72	vir72	OK	0.650439	2.19645	1.75569	3.37688	2.46049	5e-05	0.000280515	yes
GSR	ENSG00000104687	con72	vir72	OK	92.7953	312.806	1.75315	3.37094	5.98901	5e-05	0.000280515	yes
KDM2A	ENSG00000173120	con72	vir72	OK	23.8654	80.4064	1.75239	3.36916	5.01632	5e-05	0.000280515	yes
URB2	ENSG00000135763	con72	vir72	OK	5.32527	17.9225	1.75084	3.36554	4.67323	5e-05	0.000280515	yes
C12orf49	ENSG00000111412	con72	vir72	OK	22.7926	76.6817	1.75031	3.36431	5.71248	5e-05	0.000280515	yes
ZNF281	ENSG00000162702	con72	vir72	OK	10.5444	35.4061	1.74752	3.35781	5.74252	5e-05	0.000280515	yes
IP6K1	ENSG00000176095	con72	vir72	OK	11.801	39.5788	1.74582	3.35385	5.41029	5e-05	0.000280515	yes
HLA-V	ENSG00000181126	con72	vir72	OK	0.435492	1.45938	1.74464	3.35111	2.02293	5e-05	0.000280515	yes
MRPS31P5	ENSG00000243406	con72	vir72	OK	4.5353	15.1941	1.74424	3.35018	2.4474	5e-05	0.000280515	yes
KCTD20	ENSG00000112078	con72	vir72	OK	35.5214	118.957	1.74368	3.34888	5.17279	5e-05	0.000280515	yes
VASN	ENSG00000168140	con72	vir72	OK	0.663366	2.22148	1.74364	3.34879	1.29065	0.00655	0.0236348	yes
MRPS2	ENSG00000122140	con72	vir72	OK	12.3077	41.1731	1.74214	3.34531	4.09	5e-05	0.000280515	yes
ZNF329	ENSG00000181894	con72	vir72	OK	0.334778	1.11948	1.74155	3.34394	2.17886	5e-05	0.000280515	yes
PPP4R1	ENSG00000154845	con72	vir72	OK	24.5463	82.0722	1.74139	3.34357	3.59714	5e-05	0.000280515	yes
NUP98	ENSG00000110713	con72	vir72	OK	59.5684	199.053	1.74053	3.34158	2.73089	5e-05	0.000280515	yes
EMP3	ENSG00000142227	con72	vir72	OK	24.6717	82.4126	1.74001	3.34037	4.02724	5e-05	0.000280515	yes
TMEM241	ENSG00000134490	con72	vir72	OK	21.2607	70.9867	1.73936	3.33887	3.02435	5e-05	0.000280515	yes
NAT9	ENSG00000109065	con72	vir72	OK	42.6933	142.502	1.7389	3.33781	3.95726	5e-05	0.000280515	yes
H3F3B	ENSG00000132475	con72	vir72	OK	160.429	535.294	1.73839	3.33663	4.88168	5e-05	0.000280515	yes
ORAOV1	ENSG00000149716	con72	vir72	OK	7.87964	26.2511	1.73618	3.33152	0.882978	0.0003	0.00148912	yes
SPATA5L1	ENSG00000171763	con72	vir72	OK	7.46737	24.8715	1.73582	3.33069	2.42768	5e-05	0.000280515	yes
NFRKB	ENSG00000170322	con72	vir72	OK	17.9895	59.9114	1.73567	3.33034	2.90391	5e-05	0.000280515	yes
PKD1L2	ENSG00000166473	con72	vir72	OK	0.435967	1.45113	1.73489	3.32854	1.58906	5e-05	0.000280515	yes
PI4K2A	ENSG00000155252	con72	vir72	OK	11.2789	37.5015	1.73332	3.32492	4.93569	5e-05	0.000280515	yes
AURKC	ENSG00000105146	con72	vir72	OK	0.40142	1.33445	1.73307	3.32434	1.63332	5e-05	0.000280515	yes
ZNF3	ENSG00000166526	con72	vir72	OK	47.2376	156.923	1.73205	3.322	3.29096	5e-05	0.000280515	yes
POLR3D	ENSG00000168495	con72	vir72	OK	9.38997	31.188	1.7318	3.32142	4.08059	5e-05	0.000280515	yes
VPS18	ENSG00000104142	con72	vir72	OK	12.979	43.0928	1.73127	3.3202	3.73434	5e-05	0.000280515	yes
HSP90B3P	ENSG00000203914	con72	vir72	OK	17.3832	57.7112	1.73116	3.31995	5.19634	5e-05	0.000280515	yes
RUNX1	ENSG00000159216	con72	vir72	OK	9.19333	30.5209	1.73114	3.3199	4.5719	5e-05	0.000280515	yes
CYLD	ENSG00000083799	con72	vir72	OK	12.0294	39.9301	1.73091	3.31937	3.708	5e-05	0.000280515	yes
FNIP1	ENSG00000217128	con72	vir72	OK	15.3783	51.0416	1.73077	3.31905	4.62135	5e-05	0.000280515	yes
RIOK1	ENSG00000124784	con72	vir72	OK	14.6735	48.6784	1.73007	3.31744	1.75106	5e-05	0.000280515	yes
ASB1	ENSG00000065802	con72	vir72	OK	10.7083	35.4937	1.72884	3.31461	5.0797	5e-05	0.000280515	yes
AMN1	ENSG00000151743	con72	vir72	OK	30.8419	102.187	1.72825	3.31326	4.40003	5e-05	0.000280515	yes
HM13	ENSG00000101294	con72	vir72	OK	108.723	359.879	1.72685	3.31004	5.49195	5e-05	0.000280515	yes
AARSD1	ENSG00000266967	con72	vir72	OK	27.2429	90.1073	1.72576	3.30754	4.054	5e-05	0.000280515	yes
DCUN1D5	ENSG00000137692	con72	vir72	OK	37.6784	124.586	1.72534	3.30658	4.64594	5e-05	0.000280515	yes
EIF1AD	ENSG00000175376	con72	vir72	OK	18.653	61.5865	1.72321	3.3017	3.16161	5e-05	0.000280515	yes
EPT1	ENSG00000138018	con72	vir72	OK	40.5911	133.839	1.72126	3.29724	3.52427	5e-05	0.000280515	yes
LRRC37BP1	ENSG00000250462	con72	vir72	OK	4.09248	13.4809	1.71987	3.29407	2.38472	5e-05	0.000280515	yes
NOL6	ENSG00000165271	con72	vir72	OK	8.68985	28.6232	1.71978	3.29386	4.37073	5e-05	0.000280515	yes
RIT1	ENSG00000143622	con72	vir72	OK	15.6249	51.4357	1.71892	3.2919	4.74635	5e-05	0.000280515	yes
MBD2	ENSG00000134046	con72	vir72	OK	20.7316	68.1983	1.7179	3.28957	3.22366	5e-05	0.000280515	yes
UVRAG	ENSG00000198382	con72	vir72	OK	14.0406	46.1515	1.71677	3.287	3.33603	5e-05	0.000280515	yes
RP11-574K11.28	ENSG00000271816	con72	vir72	OK	1.81876	5.97386	1.71571	3.28458	2.64253	5e-05	0.000280515	yes
HLA-K	ENSG00000230795	con72	vir72	OK	0.499008	1.6389	1.7156	3.28433	2.35902	5e-05	0.000280515	yes
SPIRE1	ENSG00000134278	con72	vir72	OK	20.0061	65.6055	1.71338	3.27928	2.73112	5e-05	0.000280515	yes
CTNNAL1	ENSG00000119326	con72	vir72	OK	53.1949	174.404	1.71307	3.27858	5.4571	5e-05	0.000280515	yes
DMTF1	ENSG00000135164	con72	vir72	OK	40.1203	131.516	1.71284	3.27805	2.45704	5e-05	0.000280515	yes
WIPI1	ENSG00000070540	con72	vir72	OK	17.9774	58.8747	1.71146	3.27492	1.4677	0.00015	0.000786087	yes
SEC23IP	ENSG00000107651	con72	vir72	OK	38.3231	125.473	1.71109	3.27408	3.02955	5e-05	0.000280515	yes
VGLL3	ENSG00000206538	con72	vir72	OK	0.828548	2.71258	1.71101	3.2739	2.25497	5e-05	0.000280515	yes
TJP1	ENSG00000104067	con72	vir72	OK	52.6963	172.474	1.7106	3.27297	3.20454	5e-05	0.000280515	yes
GZF1	ENSG00000125812	con72	vir72	OK	7.18064	23.4996	1.71045	3.27263	4.64449	5e-05	0.000280515	yes
STARD3NL	ENSG00000010270	con72	vir72	OK	57.1297	186.921	1.71012	3.27188	5.66566	5e-05	0.000280515	yes
PNPLA8	ENSG00000135241	con72	vir72	OK	24.5527	80.3216	1.70991	3.2714	2.80318	5e-05	0.000280515	yes
F2RL1	ENSG00000164251	con72	vir72	OK	40.8085	133.407	1.7089	3.26911	5.03717	5e-05	0.000280515	yes
TEF	ENSG00000167074	con72	vir72	OK	10.9187	35.6865	1.70858	3.26839	5.46016	5e-05	0.000280515	yes
ZFAND5	ENSG00000107372	con72	vir72	OK	38.529	125.894	1.70819	3.26751	5.62205	5e-05	0.000280515	yes
BTRC	ENSG00000166167	con72	vir72	OK	17.733	57.8147	1.705	3.26029	2.72805	5e-05	0.000280515	yes
CAMSAP1	ENSG00000130559	con72	vir72	OK	8.39495	27.3691	1.70495	3.26018	5.20192	5e-05	0.000280515	yes
PRPF38AP2	ENSG00000236582	con72	vir72	OK	2.90898	9.47318	1.70334	3.25654	3.21991	5e-05	0.000280515	yes
DDX58	ENSG00000107201	con72	vir72	OK	3.96867	12.9215	1.70304	3.25586	4.46861	5e-05	0.000280515	yes
SLC25A28	ENSG00000155287	con72	vir72	OK	10.9911	35.7745	1.70259	3.25485	3.78831	5e-05	0.000280515	yes
GOLGA3	ENSG00000090615	con72	vir72	OK	9.1426	29.7132	1.70043	3.24998	0.749797	0.0002	0.00102556	yes
NUMBL	ENSG00000105245	con72	vir72	OK	3.73549	12.1377	1.70013	3.2493	3.94441	5e-05	0.000280515	yes
MRGBP	ENSG00000101189	con72	vir72	OK	10.6011	34.4296	1.69944	3.24775	4.92178	5e-05	0.000280515	yes
ZNF383	ENSG00000188283	con72	vir72	OK	10.6071	34.4092	1.69777	3.24399	1.95079	5e-05	0.000280515	yes
BLOC1S3	ENSG00000189114	con72	vir72	OK	6.00742	19.4485	1.69484	3.23741	2.31783	5e-05	0.000280515	yes
TNFRSF10D	ENSG00000173530	con72	vir72	OK	24.4772	79.0093	1.69058	3.22786	5.81067	5e-05	0.000280515	yes
MKL1	ENSG00000196588	con72	vir72	OK	3.63751	11.7333	1.68959	3.22565	1.41978	5e-05	0.000280515	yes
MBNL2	ENSG00000139793	con72	vir72	OK	84.8072	273.443	1.68898	3.22429	4.42973	5e-05	0.000280515	yes
ZNF217	ENSG00000171940	con72	vir72	OK	63.3907	204.285	1.68824	3.22263	3.08955	5e-05	0.000280515	yes
SRPR	ENSG00000182934	con72	vir72	OK	82.7092	266.365	1.68729	3.22051	4.63222	5e-05	0.000280515	yes
FBXO38	ENSG00000145868	con72	vir72	OK	43.1537	138.837	1.68583	3.21725	3.31759	5e-05	0.000280515	yes
ILKAP	ENSG00000132323	con72	vir72	OK	12.5816	40.4691	1.6855	3.21652	4.32365	5e-05	0.000280515	yes
RP11-7K24.3	ENSG00000261068	con72	vir72	OK	3.0275	9.73778	1.68547	3.21645	3.79692	5e-05	0.000280515	yes
LINC00843	ENSG00000178440	con72	vir72	OK	2.80055	9.00237	1.68459	3.21449	1.49352	0.00225	0.00920323	yes
MAPK6PS4	ENSG00000215179	con72	vir72	OK	0.605658	1.94641	1.68424	3.21371	2.73553	5e-05	0.000280515	yes
THBS1	ENSG00000137801	con72	vir72	OK	42.5145	136.515	1.68303	3.21102	3.47546	5e-05	0.000280515	yes
ZNF202	ENSG00000166261	con72	vir72	OK	6.02768	19.3317	1.68129	3.20715	3.43785	5e-05	0.000280515	yes
MED15	ENSG00000099917	con72	vir72	OK	12.4996	40.0864	1.68123	3.20701	2.72204	5e-05	0.000280515	yes
C1orf52	ENSG00000162642	con72	vir72	OK	12.5873	40.3566	1.68084	3.20615	4.0261	5e-05	0.000280515	yes
ABHD3	ENSG00000158201	con72	vir72	OK	31.4441	100.798	1.6806	3.20561	4.35471	5e-05	0.000280515	yes
SRA1	ENSG00000213523	con72	vir72	OK	10.9989	35.2418	1.67992	3.2041	1.1312	0.0127	0.0419115	yes
ELL	ENSG00000105656	con72	vir72	OK	3.51163	11.2503	1.67976	3.20375	3.16687	5e-05	0.000280515	yes
RP1-239B22.5	ENSG00000260196	con72	vir72	OK	1.03298	3.30925	1.67969	3.20359	3.33069	5e-05	0.000280515	yes
LRRC59	ENSG00000108829	con72	vir72	OK	94.6963	302.842	1.67719	3.19804	5.79118	5e-05	0.000280515	yes
MCTP2	ENSG00000140563	con72	vir72	OK	8.13446	26.006	1.67673	3.19702	3.44406	5e-05	0.000280515	yes
SPATA2	ENSG00000158480	con72	vir72	OK	3.02917	9.68379	1.67665	3.19685	4.16691	5e-05	0.000280515	yes
PDRG1	ENSG00000088356	con72	vir72	OK	23.656	75.5844	1.67588	3.19514	5.3227	5e-05	0.000280515	yes
ALS2	ENSG00000003393	con72	vir72	OK	19.3567	61.7998	1.67477	3.19268	3.04816	5e-05	0.000280515	yes
RP11-231C14.4	ENSG00000169203	con72	vir72	OK	1.16445	3.71425	1.67342	3.1897	1.9722	5e-05	0.000280515	yes
ZNF555	ENSG00000186300	con72	vir72	OK	4.63473	14.7654	1.67166	3.18581	3.49378	5e-05	0.000280515	yes
SYVN1	ENSG00000162298	con72	vir72	OK	29.5826	94.243	1.67164	3.18577	1.8904	5e-05	0.000280515	yes
SF3B3	ENSG00000189091	con72	vir72	OK	55.2667	176.01	1.67117	3.18473	2.54589	5e-05	0.000280515	yes
SSH1	ENSG00000084112	con72	vir72	OK	6.66161	21.2132	1.67102	3.1844	3.96041	5e-05	0.000280515	yes
MEPCE	ENSG00000146834	con72	vir72	OK	10.6145	33.78	1.67014	3.18245	4.02214	5e-05	0.000280515	yes
BIRC2	ENSG00000110330	con72	vir72	OK	29.8529	94.84	1.66762	3.1769	4.6877	5e-05	0.000280515	yes
PELI1	ENSG00000197329	con72	vir72	OK	29.967	95.1516	1.66685	3.17521	5.60734	5e-05	0.000280515	yes
ENPP1	ENSG00000197594	con72	vir72	OK	0.621991	1.97472	1.66669	3.17485	2.97131	5e-05	0.000280515	yes
MPHOSPH10	ENSG00000124383	con72	vir72	OK	14.6489	46.4557	1.66506	3.17127	5.05162	5e-05	0.000280515	yes
CLK1	ENSG00000013441	con72	vir72	OK	81.653	258.889	1.66476	3.17061	3.97664	5e-05	0.000280515	yes
AC016831.7	ENSG00000233559	con72	vir72	OK	0.835724	2.64922	1.66447	3.16997	1.75522	0.00015	0.000786087	yes
SLC35A2	ENSG00000102100	con72	vir72	OK	32.0481	101.589	1.66444	3.16991	5.21308	5e-05	0.000280515	yes
RP11-645C24.5	ENSG00000260306	con72	vir72	OK	0.573085	1.81524	1.66334	3.16749	2.36219	5e-05	0.000280515	yes
GRAMD3	ENSG00000155324	con72	vir72	OK	10.0801	31.9204	1.66296	3.16666	3.70943	5e-05	0.000280515	yes
FLCN	ENSG00000154803	con72	vir72	OK	11.6268	36.7933	1.66199	3.16453	1.74404	5e-05	0.000280515	yes
SERTAD3	ENSG00000167565	con72	vir72	OK	18.4399	58.2796	1.66016	3.16052	4.41603	5e-05	0.000280515	yes
RCE1	ENSG00000173653	con72	vir72	OK	10.1473	32.0671	1.66	3.16017	2.97465	5e-05	0.000280515	yes
WNK4	ENSG00000126562	con72	vir72	OK	1.23353	3.8967	1.65946	3.15898	1.48381	5e-05	0.000280515	yes
NOL10	ENSG00000115761	con72	vir72	OK	20.4904	64.6595	1.65791	3.15559	4.58122	5e-05	0.000280515	yes
SIPA1L2	ENSG00000116991	con72	vir72	OK	1.24396	3.92539	1.6579	3.15557	2.13852	5e-05	0.000280515	yes
EREG	ENSG00000124882	con72	vir72	OK	65.8546	207.786	1.65774	3.15522	5.41136	5e-05	0.000280515	yes
ORMDL2	ENSG00000123353	con72	vir72	OK	40.8266	128.528	1.65451	3.14816	2.39501	5e-05	0.000280515	yes
FAF2	ENSG00000113194	con72	vir72	OK	42.9556	135.222	1.65441	3.14794	5.5286	5e-05	0.000280515	yes
BTAF1	ENSG00000095564	con72	vir72	OK	24.7331	77.8569	1.65438	3.14788	4.58021	5e-05	0.000280515	yes
ZNF699	ENSG00000196110	con72	vir72	OK	11.4257	35.9596	1.6541	3.14727	4.34083	5e-05	0.000280515	yes
CRY2	ENSG00000121671	con72	vir72	OK	6.77793	21.3248	1.65361	3.1462	3.44169	5e-05	0.000280515	yes
PLAGL2	ENSG00000126003	con72	vir72	OK	10.6663	33.533	1.65253	3.14384	5.42485	5e-05	0.000280515	yes
ZBTB11	ENSG00000066422	con72	vir72	OK	11.7328	36.8647	1.65169	3.14201	5.0143	5e-05	0.000280515	yes
TSKU	ENSG00000182704	con72	vir72	OK	12.979	40.7554	1.65081	3.1401	4.9293	5e-05	0.000280515	yes
ARFGAP1	ENSG00000101199	con72	vir72	OK	18.2065	57.1679	1.65075	3.13997	3.18039	5e-05	0.000280515	yes
LRIG2	ENSG00000198799	con72	vir72	OK	10.6731	33.5092	1.65058	3.1396	3.05651	5e-05	0.000280515	yes
TTN-AS1	ENSG00000237298	con72	vir72	OK	7.70415	24.1697	1.64949	3.13723	2.84519	5e-05	0.000280515	yes
PPRC1	ENSG00000148840	con72	vir72	OK	13.1287	41.1736	1.64899	3.13614	3.4982	5e-05	0.000280515	yes
BCL2L13	ENSG00000099968	con72	vir72	OK	80.7303	253.043	1.6482	3.13442	3.03405	5e-05	0.000280515	yes
NR6A1	ENSG00000148200	con72	vir72	OK	2.87276	8.98604	1.64525	3.12802	4.51893	5e-05	0.000280515	yes
PINX1	ENSG00000254093	con72	vir72	OK	18.7682	58.6914	1.64486	3.12718	3.72783	5e-05	0.000280515	yes
ZNF674-AS1	ENSG00000230844	con72	vir72	OK	5.15062	16.1035	1.64456	3.12652	3.91296	5e-05	0.000280515	yes
DIABLO	ENSG00000184047	con72	vir72	OK	81.9462	256.06	1.64373	3.12473	3.49104	5e-05	0.000280515	yes
CYTH3	ENSG00000008256	con72	vir72	OK	7.06544	22.0573	1.64241	3.12187	4.11609	5e-05	0.000280515	yes
SLC25A42	ENSG00000181035	con72	vir72	OK	1.97554	6.16592	1.64207	3.12113	2.48479	5e-05	0.000280515	yes
RRN3P1	ENSG00000248124	con72	vir72	OK	4.29103	13.386	1.64133	3.11953	3.10032	5e-05	0.000280515	yes
RP11-345L23.1	ENSG00000235899	con72	vir72	OK	0.622222	1.941	1.6413	3.11947	1.69509	0.00025	0.00125904	yes
AGFG1	ENSG00000173744	con72	vir72	OK	33.8486	105.496	1.64002	3.1167	3.63839	5e-05	0.000280515	yes
KDM4C	ENSG00000107077	con72	vir72	OK	12.7735	39.783	1.639	3.1145	3.18441	5e-05	0.000280515	yes
AC093838.4	ENSG00000152117	con72	vir72	OK	5.94082	18.4972	1.63857	3.11357	2.78871	5e-05	0.000280515	yes
PPP1R14C	ENSG00000198729	con72	vir72	OK	2.36057	7.34938	1.63849	3.1134	3.59147	5e-05	0.000280515	yes
CDC14A	ENSG00000079335	con72	vir72	OK	6.62593	20.6181	1.63771	3.11172	3.56955	5e-05	0.000280515	yes
ATF7IP2	ENSG00000166669	con72	vir72	OK	16.2955	50.6579	1.63631	3.1087	2.62717	5e-05	0.000280515	yes
MAPK6	ENSG00000069956	con72	vir72	OK	59.8327	185.776	1.63456	3.10493	2.76096	5e-05	0.000280515	yes
FHL2	ENSG00000115641	con72	vir72	OK	78.1825	242.528	1.63324	3.10209	5.36576	5e-05	0.000280515	yes
SIRT1	ENSG00000096717	con72	vir72	OK	23.5169	72.9322	1.63286	3.10127	5.04517	5e-05	0.000280515	yes
NADK	ENSG00000008130	con72	vir72	OK	17.8953	55.4046	1.63043	3.09605	3.16491	5e-05	0.000280515	yes
DDX19A	ENSG00000168872	con72	vir72	OK	12.0661	37.345	1.62996	3.09504	2.28663	5e-05	0.000280515	yes
FBXW7	ENSG00000109670	con72	vir72	OK	16.385	50.7078	1.62983	3.09477	3.86907	5e-05	0.000280515	yes
USP12PX	ENSG00000226081	con72	vir72	OK	3.62278	11.1878	1.62676	3.08819	3.27524	5e-05	0.000280515	yes
RPS6KA5	ENSG00000100784	con72	vir72	OK	9.82827	30.3261	1.62555	3.0856	3.31435	5e-05	0.000280515	yes
CAPN10-AS1	ENSG00000260942	con72	vir72	OK	0.575001	1.774	1.62537	3.08521	3.04933	5e-05	0.000280515	yes
TOPORS	ENSG00000197579	con72	vir72	OK	8.82183	27.2139	1.62519	3.08483	3.982	5e-05	0.000280515	yes
PALLD	ENSG00000129116	con72	vir72	OK	11.9004	36.7091	1.62513	3.0847	3.26189	5e-05	0.000280515	yes
AFTPH	ENSG00000119844	con72	vir72	OK	28.4146	87.6067	1.62441	3.08316	5.35959	5e-05	0.000280515	yes
INO80	ENSG00000128908	con72	vir72	OK	11.8286	36.4309	1.62288	3.07989	2.90156	5e-05	0.000280515	yes
C14orf28	ENSG00000179476	con72	vir72	OK	2.31897	7.13892	1.62222	3.07848	3.02755	5e-05	0.000280515	yes
IZUMO1	ENSG00000182264	con72	vir72	OK	2.86435	8.80865	1.62071	3.07526	2.20591	5e-05	0.000280515	yes
C9orf72	ENSG00000147894	con72	vir72	OK	24.2129	74.3764	1.61907	3.07177	4.88601	5e-05	0.000280515	yes
SLC37A3	ENSG00000157800	con72	vir72	OK	28.7618	88.301	1.61827	3.07007	3.90132	5e-05	0.000280515	yes
ZNF14	ENSG00000105708	con72	vir72	OK	4.71859	14.482	1.61783	3.06913	4.38404	5e-05	0.000280515	yes
LUZP1	ENSG00000169641	con72	vir72	OK	11.3864	34.9399	1.61757	3.06858	2.8576	5e-05	0.000280515	yes
KLHL25	ENSG00000183655	con72	vir72	OK	0.755584	2.31318	1.61421	3.06144	1.69864	5e-05	0.000280515	yes
PDE4B	ENSG00000184588	con72	vir72	OK	0.808294	2.46938	1.6112	3.05506	1.58419	5e-05	0.000280515	yes
ZNF674	ENSG00000251192	con72	vir72	OK	5.10569	15.5927	1.6107	3.054	2.1063	5e-05	0.000280515	yes
RELA	ENSG00000173039	con72	vir72	OK	16.5271	50.4711	1.61062	3.05383	3.84732	5e-05	0.000280515	yes
AAR2	ENSG00000131043	con72	vir72	OK	10.9049	33.2999	1.61054	3.05366	4.78028	5e-05	0.000280515	yes
AKAP13	ENSG00000170776	con72	vir72	OK	11.3846	34.721	1.60872	3.04981	2.25266	5e-05	0.000280515	yes
MED27	ENSG00000160563	con72	vir72	OK	8.78806	26.7979	1.6085	3.04935	3.46367	5e-05	0.000280515	yes
BTG1	ENSG00000133639	con72	vir72	OK	38.7308	117.925	1.60631	3.04472	5.47296	5e-05	0.000280515	yes
LRP12	ENSG00000147650	con72	vir72	OK	17.3714	52.8759	1.6059	3.04386	3.84627	5e-05	0.000280515	yes
TARSL2	ENSG00000185418	con72	vir72	OK	4.41107	13.4215	1.60534	3.04267	3.75223	5e-05	0.000280515	yes
PLAU	ENSG00000122861	con72	vir72	OK	1.97471	6.00425	1.60435	3.04059	2.50563	5e-05	0.000280515	yes
GULP1	ENSG00000144366	con72	vir72	OK	37.8241	115.003	1.60429	3.04046	4.39779	5e-05	0.000280515	yes
PPP4R2	ENSG00000163605	con72	vir72	OK	32.7868	99.632	1.60349	3.03878	3.75978	5e-05	0.000280515	yes
MTRR	ENSG00000124275	con72	vir72	OK	31.9133	96.9274	1.60275	3.03722	2.88151	5e-05	0.000280515	yes
ZSCAN9	ENSG00000137185	con72	vir72	OK	11.8497	35.9803	1.60236	3.0364	4.43661	5e-05	0.000280515	yes
PPP4R1L	ENSG00000124224	con72	vir72	OK	4.29649	13.0385	1.60155	3.03469	2.767	5e-05	0.000280515	yes
SRPRB	ENSG00000144867	con72	vir72	OK	59.9967	182.066	1.60151	3.03461	4.52501	5e-05	0.000280515	yes
CXorf40B	ENSG00000197021	con72	vir72	OK	6.0573	18.3472	1.59881	3.02893	2.82398	5e-05	0.000280515	yes
PVR	ENSG00000073008	con72	vir72	OK	16.2729	49.2378	1.59729	3.02574	3.89322	5e-05	0.000280515	yes
NIFK	ENSG00000155438	con72	vir72	OK	50.1137	151.582	1.59682	3.02476	4.63323	5e-05	0.000280515	yes
ZNF490	ENSG00000188033	con72	vir72	OK	4.14711	12.542	1.59659	3.02428	1.59227	0.00015	0.000786087	yes
ADAM17	ENSG00000151694	con72	vir72	OK	25.4652	76.9034	1.59452	3.01994	5.08648	5e-05	0.000280515	yes
APPBP2	ENSG00000062725	con72	vir72	OK	40.2538	121.518	1.59398	3.01881	2.60527	5e-05	0.000280515	yes
ELL2P1	ENSG00000227295	con72	vir72	OK	1.22429	3.69581	1.59394	3.01873	2.97063	5e-05	0.000280515	yes
BRPF1	ENSG00000156983	con72	vir72	OK	3.77633	11.3979	1.59371	3.01825	2.77126	5e-05	0.000280515	yes
CBWD6	ENSG00000204790	con72	vir72	OK	0.976011	2.94568	1.59363	3.01808	2.18891	5e-05	0.000280515	yes
RNF19B	ENSG00000116514	con72	vir72	OK	13.4101	40.4694	1.59351	3.01783	4.99798	5e-05	0.000280515	yes
UBN1	ENSG00000118900	con72	vir72	OK	13.328	40.1621	1.59137	3.01335	2.97319	5e-05	0.000280515	yes
ZNF607	ENSG00000198182	con72	vir72	OK	6.82239	20.5397	1.59007	3.01064	3.30905	5e-05	0.000280515	yes
ALAS1	ENSG00000023330	con72	vir72	OK	36.9764	111.094	1.58711	3.00447	5.30606	5e-05	0.000280515	yes
GIGYF2	ENSG00000204120	con72	vir72	OK	87.8409	263.675	1.58579	3.00172	2.19979	5e-05	0.000280515	yes
RP1-153G14.4	ENSG00000271755	con72	vir72	OK	0.644866	1.93537	1.58554	3.0012	2.68479	5e-05	0.000280515	yes
RRP12	ENSG00000052749	con72	vir72	OK	11.3088	33.937	1.58542	3.00095	4.63201	5e-05	0.000280515	yes
MAST4	ENSG00000069020	con72	vir72	OK	3.544	10.6242	1.58391	2.99781	1.67318	5e-05	0.000280515	yes
C1orf27	ENSG00000157181	con72	vir72	OK	26.3791	79.0594	1.58354	2.99704	3.77389	5e-05	0.000280515	yes
TTC4	ENSG00000243725	con72	vir72	OK	41.4872	124.264	1.58267	2.99524	3.22742	5e-05	0.000280515	yes
ZNF200	ENSG00000010539	con72	vir72	OK	9.54259	28.5751	1.58231	2.99449	4.26424	5e-05	0.000280515	yes
STX1A	ENSG00000106089	con72	vir72	OK	4.83093	14.4639	1.58208	2.99401	1.09873	0.00545	0.0201254	yes
PSMD3	ENSG00000108344	con72	vir72	OK	30.0655	89.943	1.5809	2.99156	4.70422	5e-05	0.000280515	yes
N4BP1	ENSG00000102921	con72	vir72	OK	16.5467	49.4801	1.58031	2.99034	2.8811	5e-05	0.000280515	yes
LRRC37A2	ENSG00000238083	con72	vir72	OK	0.388572	1.16136	1.57956	2.98879	2.23429	5e-05	0.000280515	yes
BAG1	ENSG00000107262	con72	vir72	OK	18.762	56.0126	1.57794	2.98543	4.50517	5e-05	0.000280515	yes
BTN2A3P	ENSG00000124549	con72	vir72	OK	2.89573	8.64139	1.57734	2.98419	3.3631	5e-05	0.000280515	yes
MAP3K9	ENSG00000006432	con72	vir72	OK	4.59877	13.7219	1.57716	2.98382	4.81827	5e-05	0.000280515	yes
RIOK3	ENSG00000101782	con72	vir72	OK	63.1566	188.397	1.57677	2.98301	4.74451	5e-05	0.000280515	yes
AKAP10	ENSG00000108599	con72	vir72	OK	14.5201	43.3108	1.57668	2.98283	3.7683	5e-05	0.000280515	yes
SIN3B	ENSG00000127511	con72	vir72	OK	7.7879	23.2225	1.57622	2.98188	2.72687	5e-05	0.000280515	yes
ARID3B	ENSG00000179361	con72	vir72	OK	1.4397	4.29262	1.5761	2.98163	1.06628	0.00585	0.0214125	yes
NPIPB11	ENSG00000254206	con72	vir72	OK	0.647235	1.92943	1.57581	2.98103	1.75279	0.0002	0.00102556	yes
TVP23C,TVP23C-CDRT4	ENSG00000175106	con72	vir72	OK	4.62575	13.7887	1.57573	2.98086	1.39548	0.00165	0.00697706	yes
CTB-50E14.5	ENSG00000269374	con72	vir72	OK	29.5325	88.032	1.57572	2.98084	3.62847	5e-05	0.000280515	yes
WDR37	ENSG00000047056	con72	vir72	OK	3.83748	11.4364	1.5754	2.98018	4.01018	5e-05	0.000280515	yes
GDF15	ENSG00000130513	con72	vir72	OK	77.5895	231.056	1.57431	2.97793	5.14536	5e-05	0.000280515	yes
KCMF1	ENSG00000176407	con72	vir72	OK	59.6556	177.625	1.5741	2.9775	3.31397	5e-05	0.000280515	yes
LIN37	ENSG00000267796	con72	vir72	OK	15.0662	44.8589	1.57408	2.97746	2.32767	5e-05	0.000280515	yes
ADAM32	ENSG00000197140	con72	vir72	OK	0.935269	2.78416	1.57379	2.97686	1.76767	5e-05	0.000280515	yes
KCTD21	ENSG00000188997	con72	vir72	OK	4.21087	12.5252	1.57265	2.97451	2.06085	5e-05	0.000280515	yes
GLRX3	ENSG00000108010	con72	vir72	OK	35.7076	106.183	1.57225	2.97368	3.90084	5e-05	0.000280515	yes
MAP7D1	ENSG00000116871	con72	vir72	OK	10.3035	30.6321	1.57191	2.97298	2.46522	5e-05	0.000280515	yes
MEMO1	ENSG00000162959	con72	vir72	OK	4.06605	12.0834	1.57133	2.97179	1.17075	0.002	0.00828258	yes
RPAP2	ENSG00000122484	con72	vir72	OK	14.8974	44.2669	1.57117	2.97146	1.93991	5e-05	0.000280515	yes
RYBP	ENSG00000163602	con72	vir72	OK	18.0524	53.6328	1.57092	2.97094	5.50835	5e-05	0.000280515	yes
INPP1	ENSG00000151689	con72	vir72	OK	23.1302	68.6862	1.57024	2.96954	1.99057	5e-05	0.000280515	yes
GRPEL1	ENSG00000109519	con72	vir72	OK	37.6487	111.798	1.57022	2.9695	4.46361	5e-05	0.000280515	yes
TRA2A	ENSG00000164548	con72	vir72	OK	132.935	394.691	1.57	2.96905	3.2741	5e-05	0.000280515	yes
RPLP0P2	ENSG00000243742	con72	vir72	OK	0.782203	2.32164	1.56953	2.96808	1.22561	0.0016	0.00678703	yes
ZNF44	ENSG00000197857	con72	vir72	OK	9.16025	27.1683	1.56847	2.9659	3.49911	5e-05	0.000280515	yes
AVPI1	ENSG00000119986	con72	vir72	OK	7.97186	23.6355	1.56797	2.96487	4.08459	5e-05	0.000280515	yes
NR1D2	ENSG00000174738	con72	vir72	OK	46.3832	137.405	1.56676	2.96239	2.08959	5e-05	0.000280515	yes
ZNF571	ENSG00000180479	con72	vir72	OK	8.63106	25.5525	1.56585	2.96052	1.5772	5e-05	0.000280515	yes
KIAA1551	ENSG00000174718	con72	vir72	OK	31.7278	93.9116	1.56555	2.9599	1.82728	5e-05	0.000280515	yes
SLC11A2	ENSG00000110911	con72	vir72	OK	29.2694	86.5946	1.56489	2.95855	3.11544	5e-05	0.000280515	yes
ABHD5	ENSG00000011198	con72	vir72	OK	10.0951	29.8567	1.56441	2.95757	2.04724	5e-05	0.000280515	yes
FGF19	ENSG00000162344	con72	vir72	OK	2.83474	8.38125	1.56395	2.95662	3.55381	5e-05	0.000280515	yes
C16orf87	ENSG00000155330	con72	vir72	OK	11.8295	34.975	1.56394	2.9566	4.29163	5e-05	0.000280515	yes
CPSF7	ENSG00000149532	con72	vir72	OK	65.6367	193.663	1.56098	2.95054	2.53524	5e-05	0.000280515	yes
KALRN	ENSG00000160145	con72	vir72	OK	2.51151	7.40599	1.56014	2.94882	2.92883	5e-05	0.000280515	yes
FAM118B	ENSG00000197798	con72	vir72	OK	40.0669	118.079	1.55927	2.94705	1.40594	0.0035	0.0136171	yes
USP2	ENSG00000036672	con72	vir72	OK	3.46206	10.2007	1.55896	2.94641	2.58322	5e-05	0.000280515	yes
TAF1A	ENSG00000143498	con72	vir72	OK	16.4525	48.4337	1.5577	2.94384	3.87424	5e-05	0.000280515	yes
PQLC2	ENSG00000040487	con72	vir72	OK	2.00326	5.89621	1.55744	2.94331	2.73337	5e-05	0.000280515	yes
SGMS2	ENSG00000164023	con72	vir72	OK	21.6441	63.6411	1.55598	2.94033	3.50997	5e-05	0.000280515	yes
SRRD	ENSG00000100104	con72	vir72	OK	14.3756	42.2536	1.55546	2.93927	2.1332	5e-05	0.000280515	yes
ABHD17B	ENSG00000107362	con72	vir72	OK	16.9384	49.7726	1.55505	2.93844	4.74453	5e-05	0.000280515	yes
NOL8	ENSG00000198000	con72	vir72	OK	29.083	85.4558	1.555	2.93834	2.25474	5e-05	0.000280515	yes
ZNF608	ENSG00000168916	con72	vir72	OK	4.22813	12.4153	1.55403	2.93636	3.27102	5e-05	0.000280515	yes
TRIM5	ENSG00000132256	con72	vir72	OK	38.272	112.345	1.55358	2.93545	4.27161	5e-05	0.000280515	yes
ZNF284	ENSG00000186026	con72	vir72	OK	3.67489	10.7873	1.55357	2.93543	3.22866	5e-05	0.000280515	yes
LRP5L	ENSG00000100068	con72	vir72	OK	1.47534	4.33045	1.55347	2.93522	2.52852	5e-05	0.000280515	yes
GSPT2	ENSG00000189369	con72	vir72	OK	14.2367	41.7645	1.55266	2.93358	4.9984	5e-05	0.000280515	yes
TRIM16L	ENSG00000108448	con72	vir72	OK	18.5235	54.3301	1.55239	2.93303	3.69953	5e-05	0.000280515	yes
LRIF1	ENSG00000121931	con72	vir72	OK	21.2959	62.4298	1.55166	2.93154	4.78941	5e-05	0.000280515	yes
TBCCD1	ENSG00000113838	con72	vir72	OK	9.0711	26.5766	1.55081	2.92982	1.82738	5e-05	0.000280515	yes
NUP214	ENSG00000126883	con72	vir72	OK	10.7919	31.6123	1.55053	2.92925	1.49255	5e-05	0.000280515	yes
ZNF670	ENSG00000135747	con72	vir72	OK	5.66037	16.5665	1.5493	2.92675	3.35678	5e-05	0.000280515	yes
GMEB2	ENSG00000101216	con72	vir72	OK	2.46272	7.19932	1.54761	2.92332	3.78568	5e-05	0.000280515	yes
TNFRSF10B	ENSG00000120889	con72	vir72	OK	128.059	374.263	1.54724	2.92257	4.55849	5e-05	0.000280515	yes
PRDM1	ENSG00000057657	con72	vir72	OK	2.60538	7.60168	1.54483	2.9177	1.67749	5e-05	0.000280515	yes
ZNF93	ENSG00000184635	con72	vir72	OK	1.5299	4.4633	1.54467	2.91737	2.00523	5e-05	0.000280515	yes
PDXP	ENSG00000241360	con72	vir72	OK	4.24166	12.3488	1.54167	2.91131	1.84231	0.0003	0.00148912	yes
CCT6P1	ENSG00000228409	con72	vir72	OK	2.25607	6.56519	1.54103	2.91002	1.21251	0.0012	0.00523774	yes
CLCN4	ENSG00000073464	con72	vir72	OK	2.89611	8.42756	1.541	2.90996	4.24524	5e-05	0.000280515	yes
TM2D2	ENSG00000169490	con72	vir72	OK	26.1071	75.8695	1.53908	2.90609	3.24437	5e-05	0.000280515	yes
FAM118A	ENSG00000100376	con72	vir72	OK	9.48589	27.5491	1.53815	2.90422	2.97411	5e-05	0.000280515	yes
CTA-217C2.1	ENSG00000226328	con72	vir72	OK	14.9466	43.398	1.53781	2.90353	3.61935	5e-05	0.000280515	yes
RPN1	ENSG00000163902	con72	vir72	OK	123.705	358.797	1.53626	2.90042	5.23088	5e-05	0.000280515	yes
JDP2	ENSG00000140044	con72	vir72	OK	21.0736	61.0943	1.5356	2.89909	4.33664	5e-05	0.000280515	yes
ETF1P2	ENSG00000240132	con72	vir72	OK	1.53688	4.45195	1.53443	2.89674	1.49562	0.00195	0.0080971	yes
MIR24-2	ENSG00000267519	con72	vir72	OK	2.51922	7.29611	1.53415	2.89618	2.37862	5e-05	0.000280515	yes
TMEM88	ENSG00000167874	con72	vir72	OK	0.493086	1.42782	1.53391	2.8957	1.2422	0.00245	0.00992345	yes
ITCH	ENSG00000078747	con72	vir72	OK	73.7694	213.553	1.5335	2.89487	1.47622	5e-05	0.000280515	yes
DCP1A	ENSG00000162290	con72	vir72	OK	18.9661	54.9044	1.5335	2.89487	3.88203	5e-05	0.000280515	yes
PDE12	ENSG00000174840	con72	vir72	OK	8.73889	25.2617	1.53143	2.89072	4.37538	5e-05	0.000280515	yes
CHKA	ENSG00000110721	con72	vir72	OK	32.9379	95.1814	1.53093	2.88972	4.09693	5e-05	0.000280515	yes
DAGLB	ENSG00000164535	con72	vir72	OK	5.30876	15.3405	1.5309	2.88966	1.11478	0.0011	0.00484329	yes
ETF1	ENSG00000120705	con72	vir72	OK	86.8235	250.696	1.52978	2.88742	4.73953	5e-05	0.000280515	yes
ANKRD40	ENSG00000154945	con72	vir72	OK	21.922	63.294	1.52969	2.88724	4.88926	5e-05	0.000280515	yes
INTS12	ENSG00000138785	con72	vir72	OK	24.6354	71.0311	1.52772	2.8833	3.01838	5e-05	0.000280515	yes
BTG2	ENSG00000159388	con72	vir72	OK	31.5863	91.0198	1.52688	2.88162	5.21738	5e-05	0.000280515	yes
IRF6	ENSG00000117595	con72	vir72	OK	29.7432	85.6579	1.52603	2.87992	5.04941	5e-05	0.000280515	yes
OSBP	ENSG00000110048	con72	vir72	OK	42.967	123.634	1.52477	2.87741	4.49444	5e-05	0.000280515	yes
TMF1	ENSG00000144747	con72	vir72	OK	16.7314	48.1228	1.52416	2.87619	2.42494	5e-05	0.000280515	yes
CRK	ENSG00000167193	con72	vir72	OK	52.3041	150.396	1.52377	2.87541	5.34241	5e-05	0.000280515	yes
CCDC86	ENSG00000110104	con72	vir72	OK	7.71968	22.1772	1.52246	2.8728	4.11534	5e-05	0.000280515	yes
LEF1	ENSG00000138795	con72	vir72	OK	0.469033	1.34615	1.52107	2.87004	1.05537	5e-05	0.000280515	yes
YKT6	ENSG00000106636	con72	vir72	OK	45.8968	131.694	1.52073	2.86936	4.19808	5e-05	0.000280515	yes
GON4L	ENSG00000116580	con72	vir72	OK	7.25548	20.8153	1.5205	2.8689	1.39224	5e-05	0.000280515	yes
MED17	ENSG00000042429	con72	vir72	OK	23.9278	68.6451	1.52047	2.86884	1.07436	0.0004	0.00193713	yes
NDUFAF2	ENSG00000164182	con72	vir72	OK	41.8077	119.923	1.52027	2.86845	3.6191	5e-05	0.000280515	yes
KCTD6	ENSG00000168301	con72	vir72	OK	14.5359	41.6909	1.52011	2.86813	4.00783	5e-05	0.000280515	yes
TMEM81	ENSG00000174529	con72	vir72	OK	2.53691	7.2752	1.51992	2.86775	3.03788	5e-05	0.000280515	yes
YIPF5	ENSG00000145817	con72	vir72	OK	113.504	325.428	1.5196	2.86712	3.95582	5e-05	0.000280515	yes
RP11-350E12.5	ENSG00000238110	con72	vir72	OK	1.17083	3.3561	1.51926	2.86644	2.13086	5e-05	0.000280515	yes
STK19	ENSG00000204344	con72	vir72	OK	5.17022	14.8119	1.51846	2.86485	2.29277	5e-05	0.000280515	yes
BNIP1	ENSG00000113734	con72	vir72	OK	33.155	94.9755	1.51833	2.86459	4.55285	5e-05	0.000280515	yes
KARS	ENSG00000065427	con72	vir72	OK	114.075	326.317	1.51629	2.86054	4.41371	5e-05	0.000280515	yes
ZNF136	ENSG00000196646	con72	vir72	OK	12.9488	37.0326	1.51597	2.85991	2.36728	5e-05	0.000280515	yes
KLHL11	ENSG00000178502	con72	vir72	OK	5.47008	15.6413	1.51573	2.85943	4.07171	5e-05	0.000280515	yes
ZNF436	ENSG00000125945	con72	vir72	OK	7.64888	21.8706	1.51567	2.85932	4.60926	5e-05	0.000280515	yes
CCNT2	ENSG00000082258	con72	vir72	OK	22.6628	64.7934	1.51552	2.85902	3.93439	5e-05	0.000280515	yes
AC004967.7	ENSG00000243554	con72	vir72	OK	0.781451	2.23399	1.51539	2.85876	1.53501	0.00115	0.0050426	yes
BAG3	ENSG00000151929	con72	vir72	OK	9.49831	27.1467	1.51504	2.85807	4.47434	5e-05	0.000280515	yes
CYP3A5	ENSG00000106258	con72	vir72	OK	3.68621	10.5314	1.51449	2.85698	2.19527	5e-05	0.000280515	yes
ZNF131	ENSG00000172262	con72	vir72	OK	23.5931	67.3768	1.51389	2.85579	3.65777	5e-05	0.000280515	yes
ITPRIP	ENSG00000148841	con72	vir72	OK	0.588358	1.67922	1.51303	2.85409	2.73072	5e-05	0.000280515	yes
COX10	ENSG00000006695	con72	vir72	OK	14.9637	42.699	1.51273	2.85349	3.88308	5e-05	0.000280515	yes
TSSC1	ENSG00000032389	con72	vir72	OK	9.85542	28.113	1.51225	2.85255	3.5314	5e-05	0.000280515	yes
RDH13	ENSG00000160439	con72	vir72	OK	11.2231	31.9821	1.51079	2.84966	2.91378	5e-05	0.000280515	yes
ZNF554	ENSG00000172006	con72	vir72	OK	3.83387	10.918	1.50983	2.84776	3.87843	5e-05	0.000280515	yes
FAM122C	ENSG00000156500	con72	vir72	OK	4.96125	14.1203	1.50899	2.84611	1.09106	0.00695	0.0248878	yes
ZCCHC6	ENSG00000083223	con72	vir72	OK	8.69639	24.7386	1.50827	2.84469	3.3948	5e-05	0.000280515	yes
SMN1	ENSG00000172062	con72	vir72	OK	2.89386	8.23183	1.50822	2.84459	3.11554	5e-05	0.000280515	yes
CDR2L	ENSG00000109089	con72	vir72	OK	3.75296	10.6753	1.50818	2.84451	3.93081	5e-05	0.000280515	yes
GPX3	ENSG00000211445	con72	vir72	OK	14.9053	42.3573	1.50679	2.84177	3.69866	5e-05	0.000280515	yes
CDKL5	ENSG00000008086	con72	vir72	OK	2.28744	6.4908	1.50466	2.83758	3.63719	5e-05	0.000280515	yes
NUAK2	ENSG00000163545	con72	vir72	OK	7.33303	20.8028	1.5043	2.83687	4.3723	5e-05	0.000280515	yes
SETD4	ENSG00000185917	con72	vir72	OK	11.7485	33.3261	1.50417	2.83661	2.15188	5e-05	0.000280515	yes
DENND4A	ENSG00000174485	con72	vir72	OK	7.82107	22.1721	1.50331	2.83492	1.66537	0.0001	0.000538822	yes
RCHY1	ENSG00000163743	con72	vir72	OK	60.3689	171.062	1.50264	2.83361	2.89393	5e-05	0.000280515	yes
KIAA0907	ENSG00000132680	con72	vir72	OK	25.8957	73.3452	1.50199	2.83233	3.74749	5e-05	0.000280515	yes
NUS1	ENSG00000153989	con72	vir72	OK	13.1507	37.2434	1.50185	2.83206	4.88621	5e-05	0.000280515	yes
PRPF38A	ENSG00000134748	con72	vir72	OK	38.051	107.69	1.50088	2.83015	2.4015	5e-05	0.000280515	yes
LPIN1	ENSG00000134324	con72	vir72	OK	10.8051	30.5794	1.50085	2.83009	2.5139	5e-05	0.000280515	yes
ELF4	ENSG00000102034	con72	vir72	OK	7.0551	19.9347	1.49854	2.82557	3.94657	5e-05	0.000280515	yes
CSGALNACT2	ENSG00000169826	con72	vir72	OK	12.1477	34.319	1.49832	2.82514	4.173	5e-05	0.000280515	yes
CCDC117	ENSG00000159873	con72	vir72	OK	17.4165	49.1713	1.49736	2.82326	4.77996	5e-05	0.000280515	yes
RABEPK	ENSG00000136933	con72	vir72	OK	17.0574	48.1026	1.49572	2.82005	4.43344	5e-05	0.000280515	yes
RP3-406P24.1	ENSG00000216657	con72	vir72	OK	25.6931	72.3593	1.4938	2.8163	4.22122	5e-05	0.000280515	yes
TGFA	ENSG00000163235	con72	vir72	OK	20.3515	57.2871	1.49307	2.81487	4.60751	5e-05	0.000280515	yes
SLC30A7	ENSG00000162695	con72	vir72	OK	19.4144	54.6425	1.4929	2.81454	3.36894	5e-05	0.000280515	yes
PHLPP2	ENSG00000040199	con72	vir72	OK	3.85299	10.8414	1.4925	2.81376	3.63772	5e-05	0.000280515	yes
RP11-804H8.6	ENSG00000273356	con72	vir72	OK	1.45288	4.08782	1.49242	2.81361	2.1192	5e-05	0.000280515	yes
CEP95	ENSG00000258890	con72	vir72	OK	23.8414	67.0788	1.49239	2.81355	0.917598	0.00075	0.00342499	yes
CBLL1	ENSG00000105879	con72	vir72	OK	68.7098	193.307	1.49231	2.81339	2.85167	5e-05	0.000280515	yes
SURF4	ENSG00000148248	con72	vir72	OK	95.4954	268.508	1.49146	2.81173	3.90432	5e-05	0.000280515	yes
FAM220A	ENSG00000178397	con72	vir72	OK	10.1937	28.6523	1.49097	2.81078	4.11992	5e-05	0.000280515	yes
IGFBP3	ENSG00000146674	con72	vir72	OK	0.60706	1.70254	1.48778	2.80457	1.7564	5e-05	0.000280515	yes
AC005562.1	ENSG00000214719	con72	vir72	OK	5.96504	16.7098	1.48609	2.80129	2.19226	0.0001	0.000538822	yes
ACVR1	ENSG00000115170	con72	vir72	OK	11.9453	33.4611	1.48605	2.80121	3.58673	5e-05	0.000280515	yes
HSF2	ENSG00000025156	con72	vir72	OK	9.08066	25.4104	1.48455	2.7983	4.25086	5e-05	0.000280515	yes
RP11-815I9.4	ENSG00000264885	con72	vir72	OK	2.81286	7.8559	1.48174	2.79285	1.1887	0.0058	0.0212505	yes
SETX	ENSG00000107290	con72	vir72	OK	15.8022	44.1272	1.48155	2.79249	3.61155	5e-05	0.000280515	yes
NAMPTL	ENSG00000229644	con72	vir72	OK	96.3084	268.932	1.48151	2.79241	3.60791	5e-05	0.000280515	yes
OTUD3	ENSG00000169914	con72	vir72	OK	9.18754	25.6526	1.48135	2.7921	3.97758	5e-05	0.000280515	yes
RHBDD3	ENSG00000100263	con72	vir72	OK	4.43537	12.3804	1.48093	2.79129	0.887492	0.0152	0.0488928	yes
ZNF223	ENSG00000178386	con72	vir72	OK	9.87176	27.5392	1.48011	2.7897	2.06533	5e-05	0.000280515	yes
CFLAR	ENSG00000003402	con72	vir72	OK	26.281	73.3047	1.47989	2.78927	2.30897	5e-05	0.000280515	yes
ATP2A2	ENSG00000174437	con72	vir72	OK	90.952	253.65	1.47966	2.78883	4.39686	5e-05	0.000280515	yes
SDHAF1	ENSG00000205138	con72	vir72	OK	3.43147	9.56772	1.47935	2.78823	3.09477	5e-05	0.000280515	yes
CTC-444N24.11	ENSG00000268205	con72	vir72	OK	11.5365	32.1597	1.47905	2.78765	4.51682	5e-05	0.000280515	yes
CHAC2	ENSG00000143942	con72	vir72	OK	9.82862	27.358	1.4769	2.7835	1.42907	0.00105	0.00464459	yes
SDCBP	ENSG00000137575	con72	vir72	OK	129.179	359.283	1.47576	2.7813	3.97969	5e-05	0.000280515	yes
UBR5	ENSG00000104517	con72	vir72	OK	17.9963	50.0393	1.47536	2.78053	1.88738	5e-05	0.000280515	yes
DPH7	ENSG00000148399	con72	vir72	OK	16.0258	44.5526	1.47511	2.78005	3.62279	5e-05	0.000280515	yes
ZNF460	ENSG00000197714	con72	vir72	OK	2.80915	7.80704	1.47464	2.77914	3.31391	5e-05	0.000280515	yes
GCNT3	ENSG00000140297	con72	vir72	OK	17.183	47.7065	1.4732	2.77637	2.44248	5e-05	0.000280515	yes
RPP38	ENSG00000152464	con72	vir72	OK	15.4935	43.01	1.47301	2.776	2.50922	5e-05	0.000280515	yes
ZNF622	ENSG00000173545	con72	vir72	OK	8.36944	23.226	1.47254	2.7751	4.13041	5e-05	0.000280515	yes
SLC3A2	ENSG00000168003	con72	vir72	OK	296.963	823.312	1.47116	2.77245	3.92163	5e-05	0.000280515	yes
SPATS2	ENSG00000123352	con72	vir72	OK	22.3283	61.8946	1.47094	2.77202	3.04201	5e-05	0.000280515	yes
IGHMBP2	ENSG00000132740	con72	vir72	OK	3.78658	10.4951	1.47075	2.77166	1.8149	5e-05	0.000280515	yes
PPP4C	ENSG00000149923	con72	vir72	OK	18.9151	52.4256	1.47073	2.77162	4.25641	5e-05	0.000280515	yes
LSG1	ENSG00000041802	con72	vir72	OK	18.6369	51.6239	1.46988	2.76999	3.00634	5e-05	0.000280515	yes
ARNTL	ENSG00000133794	con72	vir72	OK	12.9367	35.8343	1.46986	2.76995	2.44825	5e-05	0.000280515	yes
PDIA4	ENSG00000155660	con72	vir72	OK	110.417	305.749	1.46938	2.76903	4.92356	5e-05	0.000280515	yes
C20orf24	ENSG00000101084	con72	vir72	OK	36.639	101.314	1.46738	2.76519	1.91815	0.0002	0.00102556	yes
SRF	ENSG00000112658	con72	vir72	OK	10.1866	28.1564	1.46679	2.76406	4.68633	5e-05	0.000280515	yes
MTUS1	ENSG00000129422	con72	vir72	OK	13.0616	36.0875	1.46616	2.76286	3.22994	5e-05	0.000280515	yes
XRRA1	ENSG00000166435	con72	vir72	OK	12.4588	34.418	1.46599	2.76253	1.6395	5e-05	0.000280515	yes
DDA1	ENSG00000130311	con72	vir72	OK	7.15748	19.7714	1.46589	2.76234	2.40847	5e-05	0.000280515	yes
DRG1	ENSG00000185721	con72	vir72	OK	117.492	324.37	1.46508	2.76079	2.37155	5e-05	0.000280515	yes
TRMT10C	ENSG00000174173	con72	vir72	OK	29.8589	82.429	1.46499	2.76062	4.6911	5e-05	0.000280515	yes
ABCC1	ENSG00000103222	con72	vir72	OK	15.2601	42.1262	1.46495	2.76054	3.2792	5e-05	0.000280515	yes
TOX2	ENSG00000124191	con72	vir72	OK	3.70475	10.2241	1.46452	2.75972	2.78673	5e-05	0.000280515	yes
FKRP	ENSG00000181027	con72	vir72	OK	7.60833	20.9947	1.46437	2.75943	0.743607	0.0003	0.00148912	yes
XPO6	ENSG00000169180	con72	vir72	OK	32.6476	90.0154	1.46319	2.75717	2.06846	5e-05	0.000280515	yes
INSIG2	ENSG00000125629	con72	vir72	OK	39.4982	108.82	1.46209	2.75507	4.03477	5e-05	0.000280515	yes
SH3BP4	ENSG00000130147	con72	vir72	OK	33.0769	91.0788	1.46129	2.75354	5.02781	5e-05	0.000280515	yes
SRP72P1	ENSG00000265182	con72	vir72	OK	0.915723	2.5186	1.45964	2.7504	2.53679	5e-05	0.000280515	yes
TOR1B	ENSG00000136816	con72	vir72	OK	17.1447	47.1504	1.45951	2.75015	4.08514	5e-05	0.000280515	yes
EPS15L1	ENSG00000127527	con72	vir72	OK	20.5042	56.3875	1.45945	2.75004	2.86104	5e-05	0.000280515	yes
RHOF	ENSG00000139725	con72	vir72	OK	19.553	53.7621	1.4592	2.74956	3.79016	5e-05	0.000280515	yes
AGPAT6	ENSG00000158669	con72	vir72	OK	34.5454	94.9538	1.45873	2.74866	2.89511	5e-05	0.000280515	yes
RNF115	ENSG00000121848	con72	vir72	OK	14.7104	40.4314	1.45864	2.74849	2.18641	5e-05	0.000280515	yes
RP11-384K6.6	ENSG00000260404	con72	vir72	OK	0.900622	2.47532	1.45862	2.74845	2.73358	5e-05	0.000280515	yes
MBP	ENSG00000197971	con72	vir72	OK	22.507	61.7939	1.45709	2.74554	4.77129	5e-05	0.000280515	yes
YWHAG	ENSG00000170027	con72	vir72	OK	165.979	455.628	1.45686	2.7451	4.62457	5e-05	0.000280515	yes
PTRF	ENSG00000177469	con72	vir72	OK	8.62779	23.6781	1.45649	2.7444	4.58654	5e-05	0.000280515	yes
TDPX2	ENSG00000214121	con72	vir72	OK	3.01958	8.28613	1.45635	2.74413	2.31385	5e-05	0.000280515	yes
TRAFD1	ENSG00000135148	con72	vir72	OK	17.0582	46.7865	1.45563	2.74276	3.02685	5e-05	0.000280515	yes
MARCH7	ENSG00000136536	con72	vir72	OK	63.8867	175.192	1.45535	2.74223	3.43771	5e-05	0.000280515	yes
DNAJC27	ENSG00000115137	con72	vir72	OK	3.92353	10.7572	1.45508	2.74172	2.57207	5e-05	0.000280515	yes
FEM1A	ENSG00000141965	con72	vir72	OK	11.8037	32.3601	1.45498	2.74153	4.68683	5e-05	0.000280515	yes
RP9	ENSG00000164610	con72	vir72	OK	2.59029	7.09862	1.45442	2.74046	2.80777	5e-05	0.000280515	yes
C12orf5	ENSG00000078237	con72	vir72	OK	18.663	51.0947	1.45299	2.73775	4.42245	5e-05	0.000280515	yes
SRP72P2	ENSG00000188451	con72	vir72	OK	7.82691	21.4247	1.45276	2.73731	2.71869	5e-05	0.000280515	yes
AP4B1	ENSG00000134262	con72	vir72	OK	9.94339	27.2144	1.45256	2.73693	1.59674	5e-05	0.000280515	yes
WTAP	ENSG00000146457	con72	vir72	OK	33.0521	90.4483	1.45235	2.73653	1.96466	5e-05	0.000280515	yes
UIMC1	ENSG00000087206	con72	vir72	OK	15.4064	42.1271	1.45121	2.73437	3.96487	5e-05	0.000280515	yes
ITGAX	ENSG00000140678	con72	vir72	OK	10.3506	28.2994	1.45106	2.73409	1.92611	5e-05	0.000280515	yes
SCAF4	ENSG00000156304	con72	vir72	OK	12.8483	35.1153	1.45052	2.73307	3.749	5e-05	0.000280515	yes
ARPC5L	ENSG00000136950	con72	vir72	OK	10.9023	29.7835	1.44988	2.73185	3.96828	5e-05	0.000280515	yes
SLC7A6	ENSG00000103064	con72	vir72	OK	42.3096	115.574	1.44976	2.73163	2.32461	5e-05	0.000280515	yes
MED8	ENSG00000159479	con72	vir72	OK	27.7934	75.9037	1.44943	2.731	4.53379	5e-05	0.000280515	yes
SH3RF2	ENSG00000156463	con72	vir72	OK	5.16705	14.1101	1.44931	2.73077	3.31214	5e-05	0.000280515	yes
RRP8	ENSG00000132275	con72	vir72	OK	6.72204	18.3501	1.44882	2.72985	2.43166	5e-05	0.000280515	yes
MED10	ENSG00000133398	con72	vir72	OK	35.5695	96.9469	1.44655	2.72555	4.4017	5e-05	0.000280515	yes
DDX60L	ENSG00000181381	con72	vir72	OK	5.88673	16.0257	1.44485	2.72235	0.893064	0.00115	0.0050426	yes
PMM2	ENSG00000140650	con72	vir72	OK	38.6194	105.104	1.44443	2.72155	2.74607	5e-05	0.000280515	yes
MAP2K4P1	ENSG00000269904	con72	vir72	OK	3.47628	9.45968	1.44425	2.72121	2.95979	5e-05	0.000280515	yes
CHAC1	ENSG00000128965	con72	vir72	OK	13.3402	36.2784	1.44334	2.7195	3.38249	5e-05	0.000280515	yes
CKAP4	ENSG00000136026	con72	vir72	OK	24.3089	66.0899	1.44294	2.71874	4.48004	5e-05	0.000280515	yes
ZNF77	ENSG00000175691	con72	vir72	OK	9.4442	25.6718	1.44269	2.71827	3.83435	5e-05	0.000280515	yes
GPRC5A	ENSG00000013588	con72	vir72	OK	79.2993	215.459	1.44203	2.71703	2.92161	5e-05	0.000280515	yes
ODC1	ENSG00000115758	con72	vir72	OK	182.686	495.872	1.4406	2.71434	4.78862	5e-05	0.000280515	yes
PDHX	ENSG00000110435	con72	vir72	OK	21.3146	57.8374	1.44016	2.71351	3.61348	5e-05	0.000280515	yes
ZNF764	ENSG00000169951	con72	vir72	OK	1.63731	4.43836	1.4387	2.71076	1.15029	0.008	0.0281337	yes
URB1	ENSG00000142207	con72	vir72	OK	5.7012	15.4493	1.4382	2.70983	4.44243	5e-05	0.000280515	yes
TAF9	ENSG00000085231	con72	vir72	OK	105.961	286.876	1.43689	2.70737	4.00908	5e-05	0.000280515	yes
PDCD11	ENSG00000148843	con72	vir72	OK	18.3821	49.767	1.43689	2.70737	2.36721	5e-05	0.000280515	yes
AC005336.4	ENSG00000267056	con72	vir72	OK	7.2473	19.5831	1.4341	2.70214	3.44222	5e-05	0.000280515	yes
SNAPC1	ENSG00000023608	con72	vir72	OK	13.1611	35.5552	1.43378	2.70154	2.21251	5e-05	0.000280515	yes
TRMT10B	ENSG00000165275	con72	vir72	OK	8.24858	22.2831	1.43373	2.70144	0.858042	0.00265	0.0106403	yes
ADAM19	ENSG00000135074	con72	vir72	OK	0.892008	2.4081	1.43276	2.69963	1.8017	0.00025	0.00125904	yes
CYTH1	ENSG00000108669	con72	vir72	OK	34.7166	93.6916	1.4323	2.69877	3.67415	5e-05	0.000280515	yes
BTG3	ENSG00000154640	con72	vir72	OK	23.3785	63.0561	1.43145	2.69718	4.00707	5e-05	0.000280515	yes
TMCO3	ENSG00000150403	con72	vir72	OK	136.16	367.236	1.43141	2.6971	3.73325	5e-05	0.000280515	yes
LONRF1	ENSG00000154359	con72	vir72	OK	18.0586	48.7049	1.43138	2.69705	3.29025	5e-05	0.000280515	yes
TRAPPC10	ENSG00000160218	con72	vir72	OK	11.8128	31.8535	1.4311	2.69652	2.72071	5e-05	0.000280515	yes
MRPS12	ENSG00000128626	con72	vir72	OK	12.5579	33.8568	1.43085	2.69606	3.25204	5e-05	0.000280515	yes
ABCF2	ENSG00000033050	con72	vir72	OK	32.1147	86.5539	1.43036	2.69514	3.75267	5e-05	0.000280515	yes
DHX57	ENSG00000163214	con72	vir72	OK	12.7239	34.2879	1.43016	2.69477	4.37075	5e-05	0.000280515	yes
FAM24B	ENSG00000213185	con72	vir72	OK	10.807	29.0795	1.42803	2.69079	2.79842	5e-05	0.000280515	yes
SRSF8	ENSG00000271885	con72	vir72	OK	11.9078	32.033	1.42765	2.69008	2.52721	5e-05	0.000280515	yes
PROSER2	ENSG00000148426	con72	vir72	OK	12.6066	33.8987	1.42705	2.68896	3.73008	5e-05	0.000280515	yes
NT5DC3	ENSG00000111696	con72	vir72	OK	6.97771	18.7519	1.42621	2.6874	2.91782	5e-05	0.000280515	yes
RIPK1	ENSG00000137275	con72	vir72	OK	9.03923	24.2892	1.42604	2.68708	4.47531	5e-05	0.000280515	yes
ARFGAP3	ENSG00000242247	con72	vir72	OK	26.4513	71.0554	1.42561	2.68628	2.16023	5e-05	0.000280515	yes
OTUD7B	ENSG00000163113	con72	vir72	OK	8.49808	22.821	1.42516	2.68544	4.76722	5e-05	0.000280515	yes
PI4KAP2	ENSG00000183506	con72	vir72	OK	1.13106	3.03707	1.425	2.68515	2.0471	5e-05	0.000280515	yes
CLDND1	ENSG00000080822	con72	vir72	OK	103.031	276.643	1.42494	2.68503	3.02877	5e-05	0.000280515	yes
FAM47E-STBD1	ENSG00000272414	con72	vir72	OK	6.77276	18.185	1.42494	2.68503	2.96627	5e-05	0.000280515	yes
DDX10P2	ENSG00000230360	con72	vir72	OK	0.887351	2.38182	1.42449	2.6842	2.74596	5e-05	0.000280515	yes
CELSR3	ENSG00000008300	con72	vir72	OK	3.54643	9.51552	1.42392	2.68314	2.95494	5e-05	0.000280515	yes
ENO3	ENSG00000108515	con72	vir72	OK	3.8969	10.4518	1.42336	2.68209	0.762401	0.00175	0.00735233	yes
STIP1	ENSG00000168439	con72	vir72	OK	131.71	353.207	1.42314	2.68169	3.86447	5e-05	0.000280515	yes
SRP54	ENSG00000100883	con72	vir72	OK	83.4581	223.717	1.42255	2.68059	2.8235	5e-05	0.000280515	yes
HDLBP	ENSG00000115677	con72	vir72	OK	273.824	733.922	1.42238	2.68027	1.63801	5e-05	0.000280515	yes
NRP1	ENSG00000099250	con72	vir72	OK	1.49712	4.01261	1.42236	2.68024	2.00916	5e-05	0.000280515	yes
LINC00152	ENSG00000222041	con72	vir72	OK	82.0155	219.809	1.42228	2.68009	4.18585	5e-05	0.000280515	yes
TRMT44	ENSG00000155275	con72	vir72	OK	5.04543	13.5184	1.42187	2.67933	2.34864	5e-05	0.000280515	yes
SEC24A	ENSG00000113615	con72	vir72	OK	17.9709	48.1111	1.4207	2.67715	2.81704	5e-05	0.000280515	yes
TRIM39	ENSG00000204599	con72	vir72	OK	8.11103	21.7131	1.42061	2.67699	2.18244	5e-05	0.000280515	yes
PIKFYVE	ENSG00000115020	con72	vir72	OK	10.6829	28.5771	1.41955	2.67502	3.77407	5e-05	0.000280515	yes
ESCO1	ENSG00000141446	con72	vir72	OK	15.2062	40.6636	1.41908	2.67415	4.76982	5e-05	0.000280515	yes
LINC00960	ENSG00000242516	con72	vir72	OK	3.82286	10.2218	1.41892	2.67385	3.04443	5e-05	0.000280515	yes
CTD-2006C1.2	ENSG00000219665	con72	vir72	OK	9.04349	24.1665	1.41806	2.67226	2.33073	5e-05	0.000280515	yes
ROCK1P1	ENSG00000263006	con72	vir72	OK	3.01539	8.05628	1.41777	2.67172	1.9575	5e-05	0.000280515	yes
ETF1P3	ENSG00000233833	con72	vir72	OK	0.565971	1.51196	1.41762	2.67144	1.85117	5e-05	0.000280515	yes
ST6GALNAC4	ENSG00000136840	con72	vir72	OK	3.11094	8.30522	1.41667	2.66969	2.6768	5e-05	0.000280515	yes
PPTC7	ENSG00000196850	con72	vir72	OK	17.1106	45.6368	1.41531	2.66717	3.05172	5e-05	0.000280515	yes
DERL2	ENSG00000072849	con72	vir72	OK	38.3296	102.23	1.41528	2.66711	1.47409	5e-05	0.000280515	yes
GPATCH3	ENSG00000198746	con72	vir72	OK	3.17582	8.46971	1.41519	2.66695	2.20908	5e-05	0.000280515	yes
FGFR1OP2	ENSG00000111790	con72	vir72	OK	23.0308	61.4059	1.41481	2.66625	4.58518	5e-05	0.000280515	yes
DNAJA2	ENSG00000069345	con72	vir72	OK	53.2295	141.919	1.41477	2.66617	4.82766	5e-05	0.000280515	yes
UBR4	ENSG00000127481	con72	vir72	OK	21.3367	56.854	1.41392	2.6646	1.81217	5e-05	0.000280515	yes
PTPN1	ENSG00000196396	con72	vir72	OK	14.9475	39.814	1.41337	2.66359	4.6515	5e-05	0.000280515	yes
CHMP4B	ENSG00000101421	con72	vir72	OK	35.4001	93.9676	1.40841	2.65444	4.84899	5e-05	0.000280515	yes
BOD1	ENSG00000145919	con72	vir72	OK	55.6183	147.522	1.4073	2.6524	4.54911	5e-05	0.000280515	yes
DDX31	ENSG00000125485	con72	vir72	OK	8.51623	22.5873	1.40722	2.65226	2.11188	5e-05	0.000280515	yes
LINC00346	ENSG00000255874	con72	vir72	OK	0.545631	1.44703	1.4071	2.65204	1.51213	0.00135	0.00582408	yes
EGLN3	ENSG00000129521	con72	vir72	OK	5.30198	14.0565	1.40664	2.65119	1.06552	0.00645	0.0233207	yes
CTB-158E9.2	ENSG00000253886	con72	vir72	OK	0.868368	2.30149	1.40619	2.65036	2.00667	5e-05	0.000280515	yes
MAP2K4	ENSG00000065559	con72	vir72	OK	19.6563	52.0874	1.40594	2.6499	3.60473	5e-05	0.000280515	yes
PCNXL2	ENSG00000135749	con72	vir72	OK	16.4988	43.6643	1.4041	2.64653	1.72185	5e-05	0.000280515	yes
RP11-268J15.5	ENSG00000116883	con72	vir72	OK	0.830677	2.19809	1.40389	2.64614	1.48803	0.00075	0.00342499	yes
BLCAP	ENSG00000166619	con72	vir72	OK	31.8852	84.3711	1.40386	2.64609	4.48233	5e-05	0.000280515	yes
WDR43	ENSG00000163811	con72	vir72	OK	44.2391	117.03	1.40349	2.64541	4.23622	5e-05	0.000280515	yes
UNKL	ENSG00000059145	con72	vir72	OK	3.62072	9.57731	1.40335	2.64515	1.81309	5e-05	0.000280515	yes
PANK2	ENSG00000125779	con72	vir72	OK	11.1278	29.3954	1.40142	2.64161	3.06206	5e-05	0.000280515	yes
C2orf49	ENSG00000135974	con72	vir72	OK	17.9143	47.3053	1.40089	2.64064	3.52402	5e-05	0.000280515	yes
FAM13B	ENSG00000031003	con72	vir72	OK	10.8835	28.6786	1.39784	2.63507	2.32633	5e-05	0.000280515	yes
CYB5R4	ENSG00000065615	con72	vir72	OK	5.44034	14.3281	1.39708	2.63368	1.66829	0.00015	0.000786087	yes
SS18L2	ENSG00000008324	con72	vir72	OK	24.9335	65.6379	1.39644	2.63251	1.60422	0.0005	0.00237265	yes
BAK1	ENSG00000030110	con72	vir72	OK	12.5696	33.0668	1.39545	2.63071	4.12194	5e-05	0.000280515	yes
SDHAP1	ENSG00000185485	con72	vir72	OK	3.86111	10.154	1.39497	2.62983	2.09325	5e-05	0.000280515	yes
SLC30A5	ENSG00000145740	con72	vir72	OK	40.9744	107.733	1.39467	2.62928	3.60242	5e-05	0.000280515	yes
C16orf80	ENSG00000070761	con72	vir72	OK	18.2338	47.8997	1.3934	2.62697	2.26452	5e-05	0.000280515	yes
RP13-580F15.2	ENSG00000262823	con72	vir72	OK	1.47668	3.87886	1.39327	2.62673	1.64816	0.00025	0.00125904	yes
CTD-3195I5.5	ENSG00000262194	con72	vir72	OK	0.832448	2.18498	1.39219	2.62477	1.40681	0.0028	0.0111735	yes
ZNF627	ENSG00000198551	con72	vir72	OK	29.53	77.5012	1.39204	2.6245	2.97295	5e-05	0.000280515	yes
CSTF1	ENSG00000101138	con72	vir72	OK	30.5581	80.0793	1.38987	2.62055	3.6496	5e-05	0.000280515	yes
CTD-3105H18.13	ENSG00000261280	con72	vir72	OK	0.472182	1.23627	1.38857	2.61819	1.8984	0.0001	0.000538822	yes
AUNIP	ENSG00000127423	con72	vir72	OK	2.92086	7.64475	1.38808	2.6173	1.31553	0.0029	0.0115239	yes
ZNF227	ENSG00000131115	con72	vir72	OK	22.3229	58.4217	1.38798	2.61712	2.44281	5e-05	0.000280515	yes
KCNK6	ENSG00000099337	con72	vir72	OK	2.04506	5.3492	1.38718	2.61567	2.35757	5e-05	0.000280515	yes
MTHFD2P7	ENSG00000181260	con72	vir72	OK	22.8726	59.7981	1.38648	2.6144	3.89156	5e-05	0.000280515	yes
OSTM1	ENSG00000081087	con72	vir72	OK	38.6931	101.131	1.38607	2.61366	3.1594	5e-05	0.000280515	yes
TCP11L2	ENSG00000166046	con72	vir72	OK	12.1408	31.7127	1.3852	2.61208	1.57966	5e-05	0.000280515	yes
TNPO2	ENSG00000105576	con72	vir72	OK	27.5264	71.8898	1.38497	2.61167	2.2366	5e-05	0.000280515	yes
NCOA7	ENSG00000111912	con72	vir72	OK	36.2637	94.6772	1.38449	2.6108	3.18014	5e-05	0.000280515	yes
GPN2	ENSG00000142751	con72	vir72	OK	7.738	20.1947	1.38394	2.6098	1.19389	5e-05	0.000280515	yes
ZBTB40	ENSG00000184677	con72	vir72	OK	7.01183	18.299	1.3839	2.60973	4.59553	5e-05	0.000280515	yes
MON1B	ENSG00000103111	con72	vir72	OK	11.0216	28.7515	1.3833	2.60864	3.06476	5e-05	0.000280515	yes
KLHL18	ENSG00000114648	con72	vir72	OK	7.00602	18.2484	1.3811	2.60467	2.74393	5e-05	0.000280515	yes
NXT1	ENSG00000132661	con72	vir72	OK	9.48779	24.7085	1.38086	2.60424	3.51381	5e-05	0.000280515	yes
TTI2	ENSG00000129696	con72	vir72	OK	12.7874	33.2843	1.38011	2.60288	1.56018	5e-05	0.000280515	yes
RAP2B	ENSG00000181467	con72	vir72	OK	6.09367	15.856	1.37965	2.60205	4.20969	5e-05	0.000280515	yes
SEC16A	ENSG00000148396	con72	vir72	OK	17.5585	45.6799	1.37939	2.60158	2.71814	5e-05	0.000280515	yes
EI24P2	ENSG00000236257	con72	vir72	OK	0.785025	2.04206	1.37921	2.60126	1.80282	5e-05	0.000280515	yes
TMEM189	ENSG00000240849	con72	vir72	OK	8.28331	21.5382	1.37862	2.6002	1.28109	0.0099	0.0338151	yes
METTL22	ENSG00000067365	con72	vir72	OK	7.77771	20.2117	1.37777	2.59866	2.40838	5e-05	0.000280515	yes
TRAF3	ENSG00000131323	con72	vir72	OK	4.34386	11.279	1.37658	2.59652	2.58463	5e-05	0.000280515	yes
ZBTB9	ENSG00000213588	con72	vir72	OK	7.86247	20.4146	1.37655	2.59647	3.95319	5e-05	0.000280515	yes
LNX2	ENSG00000139517	con72	vir72	OK	25.6291	66.5273	1.37617	2.59578	4.80592	5e-05	0.000280515	yes
MDN1	ENSG00000112159	con72	vir72	OK	5.54973	14.3988	1.37546	2.59451	1.87236	5e-05	0.000280515	yes
RBM33	ENSG00000184863	con72	vir72	OK	10.7778	27.9597	1.37529	2.5942	3.62974	5e-05	0.000280515	yes
QRICH1	ENSG00000198218	con72	vir72	OK	26.2447	68.0831	1.37527	2.59416	2.14317	5e-05	0.000280515	yes
CLTC	ENSG00000141367	con72	vir72	OK	125.102	324.289	1.37418	2.59221	2.93592	5e-05	0.000280515	yes
AKIRIN1	ENSG00000174574	con72	vir72	OK	41.9489	108.717	1.37388	2.59167	4.29333	5e-05	0.000280515	yes
NRD1	ENSG00000078618	con72	vir72	OK	48.382	125.374	1.37369	2.59133	2.75724	5e-05	0.000280515	yes
ZNF146	ENSG00000167635	con72	vir72	OK	127.286	329.8	1.37352	2.59102	2.67983	5e-05	0.000280515	yes
TMEM199	ENSG00000244045	con72	vir72	OK	5.83836	15.1248	1.37328	2.59059	1.45459	0.0001	0.000538822	yes
RRN3	ENSG00000085721	con72	vir72	OK	28.5543	73.9156	1.37217	2.5886	3.04564	5e-05	0.000280515	yes
ERCC6-PGBD3	ENSG00000258838	con72	vir72	OK	2.83073	7.32466	1.37159	2.58756	1.97305	5e-05	0.000280515	yes
RDX	ENSG00000137710	con72	vir72	OK	23.3359	60.3742	1.37138	2.58718	3.60383	5e-05	0.000280515	yes
DYNC1H1	ENSG00000197102	con72	vir72	OK	22.0746	57.0832	1.37068	2.58592	1.46755	5e-05	0.000280515	yes
CDK12	ENSG00000167258	con72	vir72	OK	20.3728	52.6657	1.37022	2.5851	2.56783	5e-05	0.000280515	yes
UBASH3B	ENSG00000154127	con72	vir72	OK	3.32776	8.59747	1.36936	2.58356	3.38377	5e-05	0.000280515	yes
MSMO1	ENSG00000052802	con72	vir72	OK	256.448	662.424	1.36909	2.58308	4.23638	5e-05	0.000280515	yes
RBM12	ENSG00000244462	con72	vir72	OK	73.3539	189.334	1.36799	2.58111	2.57922	5e-05	0.000280515	yes
THSD1	ENSG00000136114	con72	vir72	OK	0.672144	1.73355	1.36688	2.57912	2.50834	5e-05	0.000280515	yes
SUPT6H	ENSG00000109111	con72	vir72	OK	26.4907	68.3015	1.36643	2.57832	2.55848	5e-05	0.000280515	yes
HABP4	ENSG00000130956	con72	vir72	OK	7.95448	20.5071	1.36629	2.57807	3.14272	5e-05	0.000280515	yes
SSFA2	ENSG00000138434	con72	vir72	OK	47.3444	122.04	1.36608	2.57769	2.83887	5e-05	0.000280515	yes
POP1	ENSG00000104356	con72	vir72	OK	2.75947	7.1081	1.36507	2.57589	2.41669	5e-05	0.000280515	yes
TEC	ENSG00000135605	con72	vir72	OK	3.80157	9.79113	1.36488	2.57555	2.7556	5e-05	0.000280515	yes
PIGG	ENSG00000174227	con72	vir72	OK	17.2481	44.4124	1.36453	2.57492	3.39733	5e-05	0.000280515	yes
ARHGAP42	ENSG00000165895	con72	vir72	OK	2.99131	7.70042	1.36416	2.57426	2.59844	5e-05	0.000280515	yes
ZCCHC2	ENSG00000141664	con72	vir72	OK	9.70599	24.9782	1.36372	2.57348	3.57356	5e-05	0.000280515	yes
FAM86B3P	ENSG00000173295	con72	vir72	OK	6.13639	15.7914	1.36367	2.57339	2.30715	5e-05	0.000280515	yes
EIF2B2	ENSG00000119718	con72	vir72	OK	13.4799	34.6614	1.36252	2.57134	3.85041	5e-05	0.000280515	yes
ARMCX6	ENSG00000198960	con72	vir72	OK	20.1956	51.9236	1.36235	2.57104	3.28472	5e-05	0.000280515	yes
CTC-512J14.5	ENSG00000248569	con72	vir72	OK	17.6494	45.3692	1.36209	2.57057	3.64063	5e-05	0.000280515	yes
P4HB	ENSG00000185624	con72	vir72	OK	247.998	637.413	1.3619	2.57023	2.17738	5e-05	0.000280515	yes
MTHFD2	ENSG00000065911	con72	vir72	OK	232.734	598.114	1.36174	2.56995	3.64115	5e-05	0.000280515	yes
ZNF593	ENSG00000142684	con72	vir72	OK	2.17093	5.57769	1.36135	2.56925	2.80855	5e-05	0.000280515	yes
ZNF335	ENSG00000198026	con72	vir72	OK	1.58111	4.0622	1.36132	2.5692	2.9197	5e-05	0.000280515	yes
MGAT2	ENSG00000168282	con72	vir72	OK	16.7484	43.0253	1.36116	2.56892	4.34402	5e-05	0.000280515	yes
JAG1	ENSG00000101384	con72	vir72	OK	36.1767	92.888	1.36043	2.56762	4.82248	5e-05	0.000280515	yes
TRNP1	ENSG00000253368	con72	vir72	OK	8.65319	22.2163	1.36031	2.5674	3.255	5e-05	0.000280515	yes
NPLOC4	ENSG00000182446	con72	vir72	OK	20.6179	52.9006	1.35938	2.56575	2.6906	5e-05	0.000280515	yes
USP25	ENSG00000155313	con72	vir72	OK	41.2536	105.815	1.35895	2.56498	4.37436	5e-05	0.000280515	yes
PRDM2	ENSG00000116731	con72	vir72	OK	11.4976	29.4742	1.35812	2.56351	2.99869	5e-05	0.000280515	yes
GAL	ENSG00000069482	con72	vir72	OK	9.49487	24.3377	1.35797	2.56324	3.06227	5e-05	0.000280515	yes
ZNF317	ENSG00000130803	con72	vir72	OK	15.3424	39.3249	1.35792	2.56315	3.48853	5e-05	0.000280515	yes
RAB11FIP5	ENSG00000135631	con72	vir72	OK	6.43739	16.4986	1.3578	2.56294	2.15809	5e-05	0.000280515	yes
NIPA2	ENSG00000140157	con72	vir72	OK	23.8417	61.1013	1.35771	2.56278	2.67431	5e-05	0.000280515	yes
TBC1D25	ENSG00000068354	con72	vir72	OK	4.88764	12.5236	1.35744	2.5623	2.31162	5e-05	0.000280515	yes
CCDC149	ENSG00000181982	con72	vir72	OK	3.9602	10.1422	1.35673	2.56104	2.94744	5e-05	0.000280515	yes
ATXN2L	ENSG00000168488	con72	vir72	OK	54.8937	140.501	1.35587	2.55951	2.30429	5e-05	0.000280515	yes
ZNF799	ENSG00000196466	con72	vir72	OK	3.18291	8.14198	1.35503	2.55802	1.21797	0.00995	0.0339577	yes
ETS2	ENSG00000157557	con72	vir72	OK	37.5315	95.9865	1.35473	2.55749	4.54537	5e-05	0.000280515	yes
BET1L	ENSG00000177951	con72	vir72	OK	18.4501	47.172	1.3543	2.55673	3.96416	5e-05	0.000280515	yes
SFPQ	ENSG00000116560	con72	vir72	OK	124.944	319.444	1.35428	2.55669	3.07091	5e-05	0.000280515	yes
DHDDS	ENSG00000117682	con72	vir72	OK	41.0463	104.855	1.35307	2.55455	3.08359	5e-05	0.000280515	yes
POM121	ENSG00000196313	con72	vir72	OK	5.12845	13.0996	1.35293	2.5543	3.83084	5e-05	0.000280515	yes
RAF1	ENSG00000132155	con72	vir72	OK	30.2703	77.2534	1.35169	2.55211	3.08173	5e-05	0.000280515	yes
SLC39A7	ENSG00000112473	con72	vir72	OK	60.0017	153.118	1.35157	2.5519	4.05369	5e-05	0.000280515	yes
ISG20L2	ENSG00000143319	con72	vir72	OK	33.1769	84.6547	1.35141	2.55161	2.22353	5e-05	0.000280515	yes
CTD-2012J19.1	ENSG00000232615	con72	vir72	OK	1.46401	3.73508	1.35121	2.55126	1.44452	0.00245	0.00992345	yes
SERPINB9	ENSG00000170542	con72	vir72	OK	15.4677	39.4455	1.3506	2.55018	4.4312	5e-05	0.000280515	yes
ACIN1	ENSG00000100813	con72	vir72	OK	98.2598	250.565	1.35051	2.55002	2.07469	5e-05	0.000280515	yes
BLZF1	ENSG00000117475	con72	vir72	OK	29.613	75.5097	1.35043	2.54988	3.03488	5e-05	0.000280515	yes
PKIB	ENSG00000135549	con72	vir72	OK	23.9344	61.0073	1.3499	2.54894	3.94254	5e-05	0.000280515	yes
TAP1	ENSG00000168394	con72	vir72	OK	18.3735	46.8127	1.34927	2.54783	3.01001	5e-05	0.000280515	yes
NBPF10	ENSG00000163386	con72	vir72	OK	2.30235	5.86587	1.34923	2.54776	2.64382	5e-05	0.000280515	yes
CDC42EP3	ENSG00000163171	con72	vir72	OK	9.58055	24.3971	1.34853	2.54653	2.88379	5e-05	0.000280515	yes
STARD13	ENSG00000133121	con72	vir72	OK	7.27357	18.5146	1.34793	2.54547	1.94974	5e-05	0.000280515	yes
AC007041.2	ENSG00000235411	con72	vir72	OK	3.20309	8.15281	1.34783	2.54529	2.68615	5e-05	0.000280515	yes
AC114755.3	ENSG00000227513	con72	vir72	OK	0.45713	1.16246	1.34651	2.54296	1.53386	0.0009	0.00404232	yes
PRPF3	ENSG00000117360	con72	vir72	OK	30.0834	76.4597	1.34573	2.54159	3.72881	5e-05	0.000280515	yes
NOS1AP	ENSG00000198929	con72	vir72	OK	2.41082	6.1112	1.34193	2.5349	1.36564	0.00035	0.0017153	yes
SLC25A44	ENSG00000160785	con72	vir72	OK	14.3515	36.3752	1.34176	2.5346	2.7881	5e-05	0.000280515	yes
DCTN5	ENSG00000166847	con72	vir72	OK	53.7298	136.178	1.3417	2.5345	3.28517	5e-05	0.000280515	yes
BCAR3	ENSG00000137936	con72	vir72	OK	3.62774	9.19213	1.34133	2.53385	2.41974	5e-05	0.000280515	yes
GPS2	ENSG00000132522	con72	vir72	OK	16.279	41.245	1.34121	2.53364	1.06764	0.00265	0.0106403	yes
AP1M1	ENSG00000072958	con72	vir72	OK	3.92962	9.95487	1.34101	2.53329	1.46937	5e-05	0.000280515	yes
ZBTB17	ENSG00000116809	con72	vir72	OK	3.62023	9.16214	1.3396	2.53081	1.60602	5e-05	0.000280515	yes
STX5	ENSG00000162236	con72	vir72	OK	26.1234	66.1038	1.33939	2.53044	4.19626	5e-05	0.000280515	yes
COX7A2P2	ENSG00000236764	con72	vir72	OK	8.4612	21.4058	1.33907	2.52988	1.62979	0.0005	0.00237265	yes
RP5-1009N12.1	ENSG00000253204	con72	vir72	OK	16.6091	42.0129	1.33886	2.52951	2.22712	5e-05	0.000280515	yes
CCRL2	ENSG00000121797	con72	vir72	OK	2.92707	7.40098	1.33826	2.52846	2.3562	5e-05	0.000280515	yes
SENP2	ENSG00000163904	con72	vir72	OK	34.2538	86.596	1.33804	2.52808	3.07688	5e-05	0.000280515	yes
KCTD2	ENSG00000180901	con72	vir72	OK	10.012	25.2996	1.33738	2.52692	2.14874	5e-05	0.000280515	yes
TMED2	ENSG00000086598	con72	vir72	OK	145.782	368.268	1.33694	2.52615	4.58458	5e-05	0.000280515	yes
SLC20A2	ENSG00000168575	con72	vir72	OK	32.7376	82.6903	1.33677	2.52585	2.29538	5e-05	0.000280515	yes
ZNF26	ENSG00000198393	con72	vir72	OK	8.83173	22.3045	1.33656	2.52548	2.43167	5e-05	0.000280515	yes
RANBP20P	ENSG00000259144	con72	vir72	OK	1.10053	2.77872	1.33622	2.52489	2.45155	5e-05	0.000280515	yes
DNAH14	ENSG00000185842	con72	vir72	OK	14.1556	35.7253	1.33557	2.52375	2.66738	5e-05	0.000280515	yes
AKAP2	ENSG00000241978	con72	vir72	OK	7.128	17.9824	1.33502	2.52279	3.41034	5e-05	0.000280515	yes
C3orf58	ENSG00000181744	con72	vir72	OK	0.407567	1.02698	1.3333	2.51978	1.30598	5e-05	0.000280515	yes
NUP153	ENSG00000124789	con72	vir72	OK	20.3339	51.2074	1.33246	2.51832	4.63832	5e-05	0.000280515	yes
LAT2	ENSG00000086730	con72	vir72	OK	3.42654	8.61875	1.33073	2.5153	2.30221	5e-05	0.000280515	yes
ZNF230	ENSG00000159882	con72	vir72	OK	3.59028	9.0283	1.33036	2.51465	2.21362	5e-05	0.000280515	yes
DDX24	ENSG00000089737	con72	vir72	OK	67.3514	169.089	1.32801	2.51056	4.25766	5e-05	0.000280515	yes
CCDC41	ENSG00000173588	con72	vir72	OK	10.1909	25.5834	1.32793	2.51042	2.3717	5e-05	0.000280515	yes
FTH1	ENSG00000167996	con72	vir72	OK	887.248	2226.62	1.32744	2.50957	3.16364	5e-05	0.000280515	yes
TSPAN13	ENSG00000106537	con72	vir72	OK	71.5417	179.436	1.32662	2.50814	4.58573	5e-05	0.000280515	yes
KATNA1	ENSG00000186625	con72	vir72	OK	7.85475	19.6996	1.32653	2.50799	3.33318	5e-05	0.000280515	yes
MRPS10	ENSG00000048544	con72	vir72	OK	29.7356	74.5513	1.32604	2.50714	4.33398	5e-05	0.000280515	yes
B4GALT4	ENSG00000121578	con72	vir72	OK	27.4712	68.8574	1.32569	2.50653	3.55353	5e-05	0.000280515	yes
LTN1	ENSG00000198862	con72	vir72	OK	14.2306	35.6555	1.32513	2.50555	2.77084	5e-05	0.000280515	yes
CUTC	ENSG00000119929	con72	vir72	OK	13.3893	33.5407	1.32483	2.50503	1.66378	0.00035	0.0017153	yes
HMGCR	ENSG00000113161	con72	vir72	OK	145.875	365.393	1.32472	2.50484	1.91485	5e-05	0.000280515	yes
ASCC3	ENSG00000112249	con72	vir72	OK	11.6457	29.1626	1.32432	2.50415	4.10356	5e-05	0.000280515	yes
ICA1	ENSG00000003147	con72	vir72	OK	70.2519	175.815	1.32345	2.50264	3.12419	5e-05	0.000280515	yes
RP11-119F19.2	ENSG00000226381	con72	vir72	OK	5.56043	13.9138	1.32324	2.50227	2.28545	5e-05	0.000280515	yes
PTAFR	ENSG00000169403	con72	vir72	OK	0.516707	1.29264	1.3229	2.50168	1.61692	0.00015	0.000786087	yes
IFNLR1	ENSG00000185436	con72	vir72	OK	7.78004	19.459	1.32259	2.50115	3.62473	5e-05	0.000280515	yes
RTCB	ENSG00000100220	con72	vir72	OK	131.58	329.081	1.3225	2.50099	2.67414	5e-05	0.000280515	yes
NUP50	ENSG00000093000	con72	vir72	OK	35.5528	88.8546	1.32148	2.49922	2.80058	5e-05	0.000280515	yes
TOB1	ENSG00000141232	con72	vir72	OK	39.4008	98.4639	1.32137	2.49903	4.38539	5e-05	0.000280515	yes
KDM6A	ENSG00000147050	con72	vir72	OK	9.08382	22.6941	1.32094	2.49829	3.02068	5e-05	0.000280515	yes
B4GALT2	ENSG00000117411	con72	vir72	OK	10.006	24.9975	1.32093	2.49827	3.1471	5e-05	0.000280515	yes
TBX19	ENSG00000143178	con72	vir72	OK	0.932708	2.32927	1.32038	2.49732	2.22302	5e-05	0.000280515	yes
MARK3	ENSG00000075413	con72	vir72	OK	40.4767	101.071	1.3202	2.49701	3.98124	5e-05	0.000280515	yes
HSPA14	ENSG00000187522	con72	vir72	OK	24.3548	60.7226	1.31803	2.49325	3.62283	5e-05	0.000280515	yes
CLINT1	ENSG00000113282	con72	vir72	OK	35.8649	89.4045	1.31778	2.49282	2.8639	5e-05	0.000280515	yes
CHIC2	ENSG00000109220	con72	vir72	OK	8.81562	21.9614	1.31684	2.4912	1.0624	0.0091	0.0314403	yes
ITGA5	ENSG00000161638	con72	vir72	OK	13.0647	32.5328	1.31622	2.49013	2.17368	5e-05	0.000280515	yes
CYP4F11	ENSG00000171903	con72	vir72	OK	9.72597	24.2172	1.31612	2.48996	3.91573	5e-05	0.000280515	yes
RNF41	ENSG00000181852	con72	vir72	OK	45.7949	113.977	1.31549	2.48887	4.11348	5e-05	0.000280515	yes
ACOT9	ENSG00000123130	con72	vir72	OK	25.6909	63.904	1.31465	2.48742	3.54403	5e-05	0.000280515	yes
RNF11	ENSG00000123091	con72	vir72	OK	78.2481	194.553	1.31404	2.48637	3.49173	5e-05	0.000280515	yes
FAM210A	ENSG00000177150	con72	vir72	OK	10.9284	27.1714	1.31401	2.48632	1.73156	5e-05	0.000280515	yes
UTP14A	ENSG00000156697	con72	vir72	OK	17.9231	44.525	1.3128	2.48423	4.32861	5e-05	0.000280515	yes
TTC38	ENSG00000075234	con72	vir72	OK	11.3527	28.1977	1.31255	2.4838	2.50903	5e-05	0.000280515	yes
EIF3A	ENSG00000107581	con72	vir72	OK	77.6816	192.932	1.31245	2.48363	4.28107	5e-05	0.000280515	yes
RNF103	ENSG00000239305	con72	vir72	OK	27.4474	68.1621	1.3123	2.48337	1.81153	0.0001	0.000538822	yes
RPL32P3	ENSG00000251474	con72	vir72	OK	6.24473	15.4947	1.31106	2.48124	1.63443	5e-05	0.000280515	yes
STAG3L5P-PVRIG2P-PILRB	ENSG00000272752	con72	vir72	OK	4.3872	10.876	1.30978	2.47904	1.83496	5e-05	0.000280515	yes
DDX55	ENSG00000111364	con72	vir72	OK	13.7632	34.1152	1.3096	2.47873	2.16704	5e-05	0.000280515	yes
LINC00969	ENSG00000242086	con72	vir72	OK	9.9929	24.7627	1.30919	2.47802	1.81473	5e-05	0.000280515	yes
HARBI1	ENSG00000180423	con72	vir72	OK	8.29962	20.5564	1.30847	2.47679	1.33797	0.0006	0.00279836	yes
ZNF669	ENSG00000188295	con72	vir72	OK	8.27538	20.4771	1.30711	2.47445	3.46668	5e-05	0.000280515	yes
UTP23	ENSG00000147679	con72	vir72	OK	14.9736	37.048	1.30698	2.47423	1.11109	0.0034	0.0132689	yes
CTC-444N24.8	ENSG00000268713	con72	vir72	OK	1.92576	4.76425	1.30682	2.47396	2.43967	5e-05	0.000280515	yes
CIRH1A	ENSG00000141076	con72	vir72	OK	66.0865	163.475	1.30664	2.47365	1.62495	5e-05	0.000280515	yes
GABPB1	ENSG00000104064	con72	vir72	OK	14.7356	36.449	1.30658	2.47354	2.6886	5e-05	0.000280515	yes
ELP3	ENSG00000134014	con72	vir72	OK	66.8563	165.162	1.30475	2.47041	3.5083	5e-05	0.000280515	yes
ZNF121	ENSG00000197961	con72	vir72	OK	31.8596	78.655	1.30381	2.4688	4.28168	5e-05	0.000280515	yes
FADD	ENSG00000168040	con72	vir72	OK	11.2466	27.7451	1.30274	2.46697	3.8238	5e-05	0.000280515	yes
U2AF1	ENSG00000160201	con72	vir72	OK	127.291	313.583	1.30072	2.46352	4.45288	5e-05	0.000280515	yes
ZNF609	ENSG00000180357	con72	vir72	OK	18.1839	44.7701	1.29987	2.46207	1.87621	5e-05	0.000280515	yes
AGPAT4	ENSG00000026652	con72	vir72	OK	9.19009	22.6164	1.29922	2.46096	2.15916	5e-05	0.000280515	yes
PWWP2A	ENSG00000170234	con72	vir72	OK	9.18208	22.5957	1.29916	2.46086	1.18183	5e-05	0.000280515	yes
PRMT5	ENSG00000100462	con72	vir72	OK	110.512	271.947	1.29913	2.4608	3.08304	5e-05	0.000280515	yes
POLR3C	ENSG00000186141	con72	vir72	OK	13.1455	32.3356	1.29855	2.45982	3.65048	5e-05	0.000280515	yes
ZNF433	ENSG00000197647	con72	vir72	OK	0.899675	2.21281	1.29841	2.45958	1.08383	0.0001	0.000538822	yes
ARRDC4	ENSG00000140450	con72	vir72	OK	63.4025	155.893	1.29795	2.45879	4.41151	5e-05	0.000280515	yes
C12orf23	ENSG00000151135	con72	vir72	OK	37.5241	92.2242	1.29733	2.45774	3.9315	5e-05	0.000280515	yes
CREB3	ENSG00000107175	con72	vir72	OK	20.5595	50.5189	1.29702	2.45721	1.4432	0.00165	0.00697706	yes
EDC3	ENSG00000179151	con72	vir72	OK	25.7658	63.3024	1.2968	2.45683	2.77312	5e-05	0.000280515	yes
CLK4	ENSG00000113240	con72	vir72	OK	22.3473	54.8977	1.29665	2.45658	3.36545	5e-05	0.000280515	yes
NSMCE2	ENSG00000156831	con72	vir72	OK	71.3194	175.09	1.29573	2.45501	2.62726	5e-05	0.000280515	yes
KIAA1217	ENSG00000120549	con72	vir72	OK	10.4938	25.7613	1.29566	2.45489	3.7714	5e-05	0.000280515	yes
RP6-99M1.2	ENSG00000270069	con72	vir72	OK	1.68223	4.12554	1.29421	2.45243	2.23012	5e-05	0.000280515	yes
TBC1D8B	ENSG00000133138	con72	vir72	OK	3.28107	8.04521	1.29396	2.452	1.21826	0.00215	0.00883839	yes
TARS	ENSG00000113407	con72	vir72	OK	297.166	728.57	1.2938	2.45173	3.06351	5e-05	0.000280515	yes
ARHGAP12	ENSG00000165322	con72	vir72	OK	26.3909	64.6864	1.29342	2.45108	3.51514	5e-05	0.000280515	yes
KDM3A	ENSG00000115548	con72	vir72	OK	13.7113	33.5969	1.29296	2.4503	3.7728	5e-05	0.000280515	yes
HBS1L	ENSG00000112339	con72	vir72	OK	108.875	266.64	1.29222	2.44905	3.03279	5e-05	0.000280515	yes
RP11-23F23.3	ENSG00000255387	con72	vir72	OK	1.29425	3.16944	1.29211	2.44886	2.42848	5e-05	0.000280515	yes
BRD4	ENSG00000141867	con72	vir72	OK	19.6528	48.1034	1.2914	2.44765	2.22981	5e-05	0.000280515	yes
SH3TC1	ENSG00000125089	con72	vir72	OK	3.81118	9.32744	1.29124	2.44738	1.31342	0.001	0.00444512	yes
RRS1	ENSG00000179041	con72	vir72	OK	14.8259	36.2812	1.2911	2.44715	3.91509	5e-05	0.000280515	yes
GJB3	ENSG00000188910	con72	vir72	OK	4.32769	10.5883	1.2908	2.44664	1.62845	0.0001	0.000538822	yes
LHFPL2	ENSG00000145685	con72	vir72	OK	26.5539	64.9659	1.29076	2.44657	3.30305	5e-05	0.000280515	yes
SLC6A6	ENSG00000131389	con72	vir72	OK	21.8415	53.4145	1.29016	2.44555	3.0819	5e-05	0.000280515	yes
RNF111	ENSG00000157450	con72	vir72	OK	17.1345	41.8875	1.28962	2.44464	1.55798	5e-05	0.000280515	yes
LINC00938	ENSG00000273015	con72	vir72	OK	15.8347	38.6955	1.28908	2.44372	3.71295	5e-05	0.000280515	yes
UQCRFS1	ENSG00000169021	con72	vir72	OK	37.7197	92.1648	1.2889	2.44342	4.11189	5e-05	0.000280515	yes
NPIPB4	ENSG00000185864	con72	vir72	OK	4.82396	11.7862	1.28881	2.44326	1.53868	5e-05	0.000280515	yes
UFD1L	ENSG00000070010	con72	vir72	OK	45.0304	109.975	1.28821	2.44225	1.88658	5e-05	0.000280515	yes
RAD54L2	ENSG00000164080	con72	vir72	OK	10.0338	24.4986	1.28783	2.44161	2.74058	5e-05	0.000280515	yes
BRAP	ENSG00000089234	con72	vir72	OK	7.76587	18.9485	1.28686	2.43996	3.85541	5e-05	0.000280515	yes
ARL8B	ENSG00000134108	con72	vir72	OK	41.4461	101.119	1.28674	2.43976	3.96213	5e-05	0.000280515	yes
RP11-761I4.3	ENSG00000259343	con72	vir72	OK	3.9336	9.59627	1.28663	2.43958	1.68025	0.00055	0.00258647	yes
BRAF	ENSG00000157764	con72	vir72	OK	11.7899	28.7464	1.28584	2.43824	3.02229	5e-05	0.000280515	yes
ERLEC1	ENSG00000068912	con72	vir72	OK	48.1209	117.316	1.28567	2.43795	3.68338	5e-05	0.000280515	yes
TMEM165	ENSG00000134851	con72	vir72	OK	66.4827	161.93	1.28432	2.43567	2.49293	5e-05	0.000280515	yes
ALDH1A3	ENSG00000184254	con72	vir72	OK	1.34065	3.26522	1.28425	2.43555	1.56164	0.0001	0.000538822	yes
KLHL20	ENSG00000076321	con72	vir72	OK	18.0099	43.8187	1.28276	2.43304	2.2249	5e-05	0.000280515	yes
ZNF343	ENSG00000088876	con72	vir72	OK	6.55606	15.9481	1.28248	2.43257	0.907152	0.01275	0.0420485	yes
NAA25	ENSG00000111300	con72	vir72	OK	22.05	53.6244	1.28212	2.43196	3.04158	5e-05	0.000280515	yes
SBDSP1	ENSG00000225648	con72	vir72	OK	15.3382	37.2952	1.28186	2.43152	3.28163	5e-05	0.000280515	yes
TRAF6	ENSG00000175104	con72	vir72	OK	4.69062	11.4035	1.28163	2.43113	3.36178	5e-05	0.000280515	yes
BTBD11	ENSG00000151136	con72	vir72	OK	0.879763	2.13758	1.28079	2.42972	2.00906	5e-05	0.000280515	yes
PRR5L	ENSG00000135362	con72	vir72	OK	3.74116	9.08979	1.28076	2.42967	1.9567	5e-05	0.000280515	yes
NFE2L2	ENSG00000116044	con72	vir72	OK	68.7416	166.837	1.27918	2.42701	3.03626	5e-05	0.000280515	yes
HSPH1	ENSG00000120694	con72	vir72	OK	58.6402	142.313	1.2791	2.42688	3.26294	5e-05	0.000280515	yes
STAMBP	ENSG00000124356	con72	vir72	OK	35.7754	86.818	1.27903	2.42676	3.21521	5e-05	0.000280515	yes
TEX30	ENSG00000151287	con72	vir72	OK	39.4251	95.6572	1.27876	2.4263	3.86613	5e-05	0.000280515	yes
VPS37A	ENSG00000155975	con72	vir72	OK	17.6318	42.7776	1.27868	2.42617	1.67937	5e-05	0.000280515	yes
SLC6A12	ENSG00000111181	con72	vir72	OK	0.654269	1.58695	1.2783	2.42553	0.922739	0.00015	0.000786087	yes
SESN2	ENSG00000130766	con72	vir72	OK	17.7536	43.0366	1.27745	2.4241	4.14515	5e-05	0.000280515	yes
ASXL2	ENSG00000143970	con72	vir72	OK	11.8395	28.6993	1.2774	2.42402	2.74754	5e-05	0.000280515	yes
SEC14L1	ENSG00000129657	con72	vir72	OK	25.8621	62.6378	1.27619	2.42199	3.90619	5e-05	0.000280515	yes
BCLAF1	ENSG00000029363	con72	vir72	OK	56.7154	137.337	1.2759	2.4215	3.21762	5e-05	0.000280515	yes
ADNP2	ENSG00000101544	con72	vir72	OK	12.1693	29.4454	1.27479	2.41964	3.79496	5e-05	0.000280515	yes
MALT1	ENSG00000172175	con72	vir72	OK	8.83708	21.3796	1.27459	2.4193	3.35586	5e-05	0.000280515	yes
MED18	ENSG00000130772	con72	vir72	OK	37.266	90.1235	1.27404	2.41838	3.22886	5e-05	0.000280515	yes
MRRF	ENSG00000148187	con72	vir72	OK	31.3778	75.8774	1.27392	2.41818	2.10972	5e-05	0.000280515	yes
KB-1460A1.5	ENSG00000261087	con72	vir72	OK	1.08012	2.61135	1.27361	2.41766	2.44259	5e-05	0.000280515	yes
CTD-2089O24.1	ENSG00000248966	con72	vir72	OK	2.4713	5.97411	1.27345	2.41739	2.98913	5e-05	0.000280515	yes
POLR3A	ENSG00000148606	con72	vir72	OK	7.76399	18.7666	1.27329	2.41712	3.40001	5e-05	0.000280515	yes
C16orf52	ENSG00000185716	con72	vir72	OK	19.6165	47.4139	1.27324	2.41704	2.50946	5e-05	0.000280515	yes
OAZ1	ENSG00000104904	con72	vir72	OK	164.592	397.823	1.27323	2.41702	4.40167	5e-05	0.000280515	yes
NOC3L	ENSG00000173145	con72	vir72	OK	57.6308	139.279	1.27306	2.41674	2.30123	5e-05	0.000280515	yes
NOTCH2NL	ENSG00000213240	con72	vir72	OK	2.82299	6.81852	1.27224	2.41536	1.84881	5e-05	0.000280515	yes
NCK1	ENSG00000158092	con72	vir72	OK	39.7698	96.006	1.27145	2.41404	2.81169	5e-05	0.000280515	yes
WIPF2	ENSG00000171475	con72	vir72	OK	24.9893	60.3228	1.27139	2.41394	3.64557	5e-05	0.000280515	yes
CDKN1A	ENSG00000124762	con72	vir72	OK	73.2314	176.744	1.27113	2.41351	4.45521	5e-05	0.000280515	yes
EPB41L4A-AS1	ENSG00000224032	con72	vir72	OK	30.7177	74.1324	1.27103	2.41334	2.06131	5e-05	0.000280515	yes
SLC19A3	ENSG00000135917	con72	vir72	OK	0.547634	1.32104	1.27039	2.41227	1.01021	0.001	0.00444512	yes
TEX10	ENSG00000136891	con72	vir72	OK	20.966	50.5522	1.26972	2.41115	3.73832	5e-05	0.000280515	yes
KCNK1	ENSG00000135750	con72	vir72	OK	9.80778	23.6456	1.26958	2.41091	2.51735	5e-05	0.000280515	yes
DDX10	ENSG00000178105	con72	vir72	OK	22.7423	54.7921	1.26859	2.40926	1.74919	5e-05	0.000280515	yes
HOTAIRM1	ENSG00000233429	con72	vir72	OK	14.8957	35.8478	1.26699	2.40659	2.76314	5e-05	0.000280515	yes
SRSF2	ENSG00000161547	con72	vir72	OK	98.387	236.55	1.26561	2.40429	3.07228	5e-05	0.000280515	yes
RNF216P1	ENSG00000196204	con72	vir72	OK	6.35993	15.2891	1.26542	2.40397	1.34954	5e-05	0.000280515	yes
FGFBP1	ENSG00000137440	con72	vir72	OK	24.6213	59.1672	1.26489	2.40309	3.81058	5e-05	0.000280515	yes
ECM1	ENSG00000143369	con72	vir72	OK	1.15324	2.77122	1.26482	2.40297	1.75161	5e-05	0.000280515	yes
SLAIN2	ENSG00000109171	con72	vir72	OK	35.6542	85.6489	1.26436	2.40221	1.53928	0.0009	0.00404232	yes
PRSS3	ENSG00000010438	con72	vir72	OK	23.1428	55.5835	1.2641	2.40177	1.01131	0.0001	0.000538822	yes
OPTN	ENSG00000123240	con72	vir72	OK	27.7047	66.533	1.26394	2.40151	3.71514	5e-05	0.000280515	yes
NETO2	ENSG00000171208	con72	vir72	OK	2.62358	6.29937	1.26367	2.40106	2.28877	5e-05	0.000280515	yes
RNF139	ENSG00000170881	con72	vir72	OK	29.1229	69.92	1.26355	2.40086	4.14943	5e-05	0.000280515	yes
CNNM4	ENSG00000158158	con72	vir72	OK	15.2322	36.5658	1.26338	2.40057	3.30534	5e-05	0.000280515	yes
HAUS2	ENSG00000137814	con72	vir72	OK	24.9665	59.9272	1.26321	2.40029	2.96519	5e-05	0.000280515	yes
ZCCHC10	ENSG00000155329	con72	vir72	OK	35.2704	84.6511	1.26307	2.40006	2.78125	5e-05	0.000280515	yes
RP11-795H16.2	ENSG00000267620	con72	vir72	OK	0.755944	1.81356	1.26247	2.39906	1.94297	5e-05	0.000280515	yes
MIEF1	ENSG00000100335	con72	vir72	OK	16.1469	38.7209	1.26186	2.39805	3.65986	5e-05	0.000280515	yes
RIOK2	ENSG00000058729	con72	vir72	OK	21.9408	52.6024	1.26151	2.39747	3.88175	5e-05	0.000280515	yes
LSM12	ENSG00000161654	con72	vir72	OK	3.00828	7.21146	1.26136	2.39722	2.73015	5e-05	0.000280515	yes
CALU	ENSG00000128595	con72	vir72	OK	185.499	444.644	1.26124	2.39702	4.08996	5e-05	0.000280515	yes
EIF5A2	ENSG00000163577	con72	vir72	OK	17.0622	40.8813	1.26064	2.39602	2.13766	5e-05	0.000280515	yes
UBA6-AS1	ENSG00000248049	con72	vir72	OK	12.9354	30.9751	1.25978	2.39459	3.1763	5e-05	0.000280515	yes
PPP2R2A	ENSG00000221914	con72	vir72	OK	81.1056	194.214	1.25977	2.39458	3.64812	5e-05	0.000280515	yes
HACL1	ENSG00000131373	con72	vir72	OK	25.194	60.3133	1.2594	2.39396	2.59067	5e-05	0.000280515	yes
AC005014.5	ENSG00000224280	con72	vir72	OK	0.783956	1.87648	1.25918	2.3936	2.33063	5e-05	0.000280515	yes
GORASP2	ENSG00000115806	con72	vir72	OK	49.1156	117.558	1.25912	2.3935	3.73271	5e-05	0.000280515	yes
SORBS1	ENSG00000095637	con72	vir72	OK	1.94227	4.64837	1.25898	2.39326	1.79358	5e-05	0.000280515	yes
ATG4AP1	ENSG00000232735	con72	vir72	OK	3.99694	9.55919	1.25799	2.39162	2.00351	5e-05	0.000280515	yes
SKIL	ENSG00000136603	con72	vir72	OK	13.7897	32.9713	1.25761	2.39099	2.05295	5e-05	0.000280515	yes
PRSS23	ENSG00000150687	con72	vir72	OK	63.4684	151.711	1.25722	2.39035	2.78076	5e-05	0.000280515	yes
KDM5A	ENSG00000073614	con72	vir72	OK	10.7457	25.6828	1.25705	2.39007	1.32647	5e-05	0.000280515	yes
GOLGB1	ENSG00000173230	con72	vir72	OK	12.5802	30.0668	1.25702	2.39002	2.31243	5e-05	0.000280515	yes
FOXJ3	ENSG00000198815	con72	vir72	OK	26.2378	62.68	1.25636	2.38892	4.20055	5e-05	0.000280515	yes
NOM1	ENSG00000146909	con72	vir72	OK	7.40975	17.6943	1.25579	2.38798	2.02522	5e-05	0.000280515	yes
SEC11C	ENSG00000166562	con72	vir72	OK	54.6718	130.514	1.25534	2.38723	3.16873	5e-05	0.000280515	yes
RP11-156E6.1	ENSG00000259623	con72	vir72	OK	13.7093	32.72	1.25501	2.38669	3.67783	5e-05	0.000280515	yes
KCND1	ENSG00000102057	con72	vir72	OK	0.627149	1.49617	1.2544	2.38568	1.649	5e-05	0.000280515	yes
PARP6	ENSG00000137817	con72	vir72	OK	21.3003	50.8146	1.25437	2.38563	2.19426	5e-05	0.000280515	yes
MAP4K3	ENSG00000011566	con72	vir72	OK	21.4474	51.1541	1.25405	2.3851	2.45703	5e-05	0.000280515	yes
INTS4	ENSG00000149262	con72	vir72	OK	18.7744	44.7775	1.25401	2.38503	1.80933	5e-05	0.000280515	yes
TBRG4	ENSG00000136270	con72	vir72	OK	36.1963	86.3015	1.25354	2.38426	2.88893	5e-05	0.000280515	yes
SMEK1	ENSG00000100796	con72	vir72	OK	31.5229	75.1366	1.25312	2.38356	3.69826	5e-05	0.000280515	yes
TRIP11	ENSG00000100815	con72	vir72	OK	11.6922	27.8649	1.25291	2.38322	3.80164	5e-05	0.000280515	yes
PPAP2A	ENSG00000067113	con72	vir72	OK	13.0505	31.0909	1.25239	2.38236	1.23754	0.00185	0.00772735	yes
CALR	ENSG00000179218	con72	vir72	OK	317.733	756.457	1.25144	2.38079	3.77544	5e-05	0.000280515	yes
FBXO45	ENSG00000174013	con72	vir72	OK	12.213	29.073	1.25126	2.38049	3.42885	5e-05	0.000280515	yes
SOWAHC	ENSG00000198142	con72	vir72	OK	18.9044	45.0001	1.25121	2.38041	4.30878	5e-05	0.000280515	yes
SHB	ENSG00000107338	con72	vir72	OK	10.1693	24.2003	1.2508	2.37973	1.30052	0.00225	0.00920323	yes
NBPF14	ENSG00000122497	con72	vir72	OK	0.843412	2.00674	1.25055	2.37932	2.3861	5e-05	0.000280515	yes
NFYA	ENSG00000001167	con72	vir72	OK	18.2834	43.4801	1.24982	2.37812	3.09228	5e-05	0.000280515	yes
MYCBP2	ENSG00000005810	con72	vir72	OK	11.4775	27.2848	1.24929	2.37724	1.84322	5e-05	0.000280515	yes
DESI2	ENSG00000121644	con72	vir72	OK	51.9133	123.263	1.24756	2.3744	4.12019	5e-05	0.000280515	yes
RNF181	ENSG00000168894	con72	vir72	OK	150.921	358.295	1.24736	2.37407	3.96041	5e-05	0.000280515	yes
AC005789.11	ENSG00000267473	con72	vir72	OK	0.816942	1.93914	1.24711	2.37365	2.01845	5e-05	0.000280515	yes
UMPS	ENSG00000114491	con72	vir72	OK	17.9959	42.712	1.24698	2.37344	3.9043	5e-05	0.000280515	yes
RBM15	ENSG00000162775	con72	vir72	OK	6.5252	15.487	1.24697	2.37342	3.5981	5e-05	0.000280515	yes
NCBP2-AS2	ENSG00000270170	con72	vir72	OK	7.23693	17.1753	1.24688	2.37328	2.81939	5e-05	0.000280515	yes
CERS5	ENSG00000139624	con72	vir72	OK	20.841	49.418	1.24561	2.37119	3.0258	5e-05	0.000280515	yes
NAPB	ENSG00000125814	con72	vir72	OK	8.87605	21.0389	1.24507	2.3703	3.49278	5e-05	0.000280515	yes
BCL3	ENSG00000069399	con72	vir72	OK	4.45943	10.5557	1.24309	2.36705	2.29051	5e-05	0.000280515	yes
ARID2	ENSG00000189079	con72	vir72	OK	10.4633	24.7659	1.24302	2.36693	2.32365	5e-05	0.000280515	yes
POLR2D	ENSG00000144231	con72	vir72	OK	48.06	113.73	1.2427	2.36641	4.00766	5e-05	0.000280515	yes
RP11-334L9.1	ENSG00000215895	con72	vir72	OK	1.10636	2.61792	1.24261	2.36626	2.29904	5e-05	0.000280515	yes
AC093673.5	ENSG00000232533	con72	vir72	OK	6.51026	15.4044	1.24256	2.36618	2.51819	5e-05	0.000280515	yes
TOE1	ENSG00000132773	con72	vir72	OK	10.5473	24.9458	1.24191	2.36511	2.19469	5e-05	0.000280515	yes
PMS2CL	ENSG00000187953	con72	vir72	OK	2.17882	5.1527	1.24178	2.3649	2.12941	5e-05	0.000280515	yes
ZCCHC9	ENSG00000131732	con72	vir72	OK	32.4648	76.7421	1.24114	2.36385	3.52632	5e-05	0.000280515	yes
PNPT1	ENSG00000138035	con72	vir72	OK	22.5274	53.2395	1.24081	2.36331	2.67033	5e-05	0.000280515	yes
DVL3	ENSG00000161202	con72	vir72	OK	11.9955	28.3468	1.24069	2.36312	0.876136	0.00725	0.0258246	yes
OFD1	ENSG00000046651	con72	vir72	OK	6.77595	16.0117	1.24063	2.36302	2.34025	5e-05	0.000280515	yes
TSC1	ENSG00000165699	con72	vir72	OK	10.2753	24.2759	1.24035	2.36256	2.44333	5e-05	0.000280515	yes
SLC25A37	ENSG00000147454	con72	vir72	OK	53.5248	126.449	1.24028	2.36244	3.7625	5e-05	0.000280515	yes
CLCC1	ENSG00000121940	con72	vir72	OK	19.3445	45.6785	1.23959	2.36131	2.79313	5e-05	0.000280515	yes
PDP1	ENSG00000164951	con72	vir72	OK	22.797	53.8173	1.23922	2.36071	4.0875	5e-05	0.000280515	yes
PFKP	ENSG00000067057	con72	vir72	OK	15.3104	36.1337	1.23884	2.36009	2.23728	5e-05	0.000280515	yes
HIVEP1	ENSG00000095951	con72	vir72	OK	9.74363	22.993	1.23866	2.35979	1.33136	0.005	0.018656	yes
ZFP57	ENSG00000204644	con72	vir72	OK	5.8987	13.9162	1.2383	2.3592	3.15625	5e-05	0.000280515	yes
MRPL49	ENSG00000149792	con72	vir72	OK	66.7047	157.347	1.23809	2.35886	2.67765	5e-05	0.000280515	yes
ZCCHC24	ENSG00000165424	con72	vir72	OK	2.25636	5.32178	1.23791	2.35857	3.02991	5e-05	0.000280515	yes
DHX29	ENSG00000067248	con72	vir72	OK	7.01326	16.5327	1.23717	2.35736	2.8394	5e-05	0.000280515	yes
YAF2	ENSG00000015153	con72	vir72	OK	12.5133	29.4942	1.23697	2.35703	2.85754	5e-05	0.000280515	yes
RRAGC	ENSG00000116954	con72	vir72	OK	19.348	45.5788	1.23618	2.35574	4.0047	5e-05	0.000280515	yes
TMEM208	ENSG00000168701	con72	vir72	OK	70.446	165.917	1.23587	2.35523	3.90297	5e-05	0.000280515	yes
ENTPD4	ENSG00000197217	con72	vir72	OK	22.5359	53.0475	1.23506	2.35391	2.64487	5e-05	0.000280515	yes
UBE2H	ENSG00000186591	con72	vir72	OK	43.9869	103.536	1.23498	2.35378	3.29045	5e-05	0.000280515	yes
AIFM2	ENSG00000042286	con72	vir72	OK	7.88855	18.5664	1.23486	2.35359	3.09844	5e-05	0.000280515	yes
FBXL12	ENSG00000127452	con72	vir72	OK	7.99422	18.8139	1.23477	2.35344	2.73042	5e-05	0.000280515	yes
RP1-281H8.3	ENSG00000219553	con72	vir72	OK	2.78945	6.56191	1.23414	2.35241	2.18182	5e-05	0.000280515	yes
PTP4A2	ENSG00000184007	con72	vir72	OK	285.87	672.176	1.23348	2.35133	3.18652	5e-05	0.000280515	yes
CREM	ENSG00000095794	con72	vir72	OK	14.5848	34.2913	1.23338	2.35117	2.64622	5e-05	0.000280515	yes
DLG5	ENSG00000151208	con72	vir72	OK	10.265	24.1287	1.23302	2.35059	3.12971	5e-05	0.000280515	yes
RPUSD2	ENSG00000166133	con72	vir72	OK	5.16156	12.1301	1.23271	2.35008	3.06607	5e-05	0.000280515	yes
UHRF1BP1	ENSG00000065060	con72	vir72	OK	15.7819	37.0857	1.2326	2.3499	3.8873	5e-05	0.000280515	yes
TBX3	ENSG00000135111	con72	vir72	OK	54.6703	128.447	1.23234	2.34948	3.28303	5e-05	0.000280515	yes
USP8	ENSG00000138592	con72	vir72	OK	47.5168	111.636	1.2323	2.34941	1.95135	5e-05	0.000280515	yes
KIAA1429	ENSG00000164944	con72	vir72	OK	21.0191	49.3825	1.2323	2.34941	2.78477	5e-05	0.000280515	yes
AC005224.2	ENSG00000231595	con72	vir72	OK	0.581913	1.36707	1.23221	2.34927	1.80443	0.0002	0.00102556	yes
RSRC2	ENSG00000111011	con72	vir72	OK	52.0881	122.363	1.23214	2.34915	3.27411	5e-05	0.000280515	yes
MTMR9	ENSG00000104643	con72	vir72	OK	7.96569	18.708	1.23178	2.34857	3.50731	5e-05	0.000280515	yes
PAK1	ENSG00000149269	con72	vir72	OK	32.843	77.0905	1.23097	2.34725	3.22916	5e-05	0.000280515	yes
ATXN7	ENSG00000163635	con72	vir72	OK	11.0254	25.8764	1.23081	2.34699	3.66165	5e-05	0.000280515	yes
ATP6V0B	ENSG00000117410	con72	vir72	OK	61.8295	145.084	1.23052	2.34652	3.612	5e-05	0.000280515	yes
MESDC1	ENSG00000140406	con72	vir72	OK	3.04673	7.14741	1.23016	2.34593	2.90612	5e-05	0.000280515	yes
ABCB6	ENSG00000115657	con72	vir72	OK	5.7728	13.54	1.22989	2.34549	1.37037	0.00025	0.00125904	yes
GOLPH3	ENSG00000113384	con72	vir72	OK	47.3989	111.156	1.22966	2.34512	4.30198	5e-05	0.000280515	yes
NSDHL	ENSG00000147383	con72	vir72	OK	18.6065	43.6286	1.22947	2.34481	3.59296	5e-05	0.000280515	yes
CRTC3	ENSG00000140577	con72	vir72	OK	9.58206	22.4586	1.22886	2.34382	3.04665	5e-05	0.000280515	yes
SPRY2	ENSG00000136158	con72	vir72	OK	18.459	43.2536	1.2285	2.34323	3.83624	5e-05	0.000280515	yes
SUPV3L1	ENSG00000156502	con72	vir72	OK	21.1469	49.5498	1.22843	2.34312	3.66305	5e-05	0.000280515	yes
ZNF638	ENSG00000075292	con72	vir72	OK	58.8925	137.947	1.22796	2.34236	1.98308	5e-05	0.000280515	yes
STRIP2	ENSG00000128578	con72	vir72	OK	1.68064	3.93584	1.22766	2.34187	2.49815	5e-05	0.000280515	yes
TOLLIP	ENSG00000078902	con72	vir72	OK	8.20073	19.2037	1.22756	2.34171	3.42872	5e-05	0.000280515	yes
RAE1	ENSG00000101146	con72	vir72	OK	37.1724	87.0201	1.22712	2.34099	3.8575	5e-05	0.000280515	yes
CEBPZ	ENSG00000115816	con72	vir72	OK	39.1231	91.5709	1.22687	2.34059	3.0838	5e-05	0.000280515	yes
FEM1C	ENSG00000145780	con72	vir72	OK	12.7453	29.822	1.22641	2.33984	4.0394	5e-05	0.000280515	yes
CLN8	ENSG00000182372	con72	vir72	OK	17.4284	40.7694	1.22605	2.33926	1.93701	5e-05	0.000280515	yes
TBPL1	ENSG00000028839	con72	vir72	OK	24.1688	56.501	1.22513	2.33777	2.32162	5e-05	0.000280515	yes
TOMM34	ENSG00000025772	con72	vir72	OK	26.2007	61.2088	1.22413	2.33615	3.14891	5e-05	0.000280515	yes
GAREM	ENSG00000141441	con72	vir72	OK	5.85948	13.6886	1.22413	2.33615	1.80054	5e-05	0.000280515	yes
SLC9A1	ENSG00000090020	con72	vir72	OK	23.211	54.2218	1.22406	2.33603	1.66449	0.0001	0.000538822	yes
TSPAN5	ENSG00000168785	con72	vir72	OK	18.8067	43.9327	1.22404	2.336	2.83922	5e-05	0.000280515	yes
PEX5	ENSG00000139197	con72	vir72	OK	20.5568	48.0076	1.22364	2.33535	3.71729	5e-05	0.000280515	yes
ARNTL2	ENSG00000029153	con72	vir72	OK	13.8325	32.2975	1.22336	2.3349	3.2931	5e-05	0.000280515	yes
EXPH5	ENSG00000110723	con72	vir72	OK	10.9106	25.473	1.22324	2.3347	3.72481	5e-05	0.000280515	yes
STX16	ENSG00000124222	con72	vir72	OK	25.8065	60.2446	1.22309	2.33446	2.99223	5e-05	0.000280515	yes
MRPL33	ENSG00000243147	con72	vir72	OK	303.081	707.376	1.22278	2.33396	2.86437	5e-05	0.000280515	yes
MAP3K13	ENSG00000073803	con72	vir72	OK	54.4479	127.071	1.22269	2.33381	1.39974	0.0003	0.00148912	yes
DAPP1	ENSG00000070190	con72	vir72	OK	0.815403	1.90293	1.22264	2.33373	1.91459	5e-05	0.000280515	yes
MECR	ENSG00000116353	con72	vir72	OK	10.2905	24.0081	1.22221	2.33304	2.48128	5e-05	0.000280515	yes
ZNF189	ENSG00000136870	con72	vir72	OK	11.0254	25.7213	1.22213	2.33291	3.80065	5e-05	0.000280515	yes
FER	ENSG00000151422	con72	vir72	OK	6.28308	14.6571	1.22206	2.3328	1.38446	0.00225	0.00920323	yes
DUSP16	ENSG00000111266	con72	vir72	OK	71.1083	165.703	1.22051	2.33029	1.53745	5e-05	0.000280515	yes
C1GALT1	ENSG00000106392	con72	vir72	OK	24.0017	55.9246	1.22035	2.33003	3.06036	5e-05	0.000280515	yes
BRD1	ENSG00000100425	con72	vir72	OK	5.34692	12.4554	1.21999	2.32945	2.19468	5e-05	0.000280515	yes
FMNL2	ENSG00000157827	con72	vir72	OK	10.7918	25.132	1.21959	2.32881	3.09052	5e-05	0.000280515	yes
ZHX2	ENSG00000178764	con72	vir72	OK	6.97686	16.2427	1.21914	2.32808	2.28589	5e-05	0.000280515	yes
WSB2	ENSG00000176871	con72	vir72	OK	64.8803	151.028	1.21896	2.32779	3.77063	5e-05	0.000280515	yes
RP11-1006G14.4	ENSG00000260534	con72	vir72	OK	1.86061	4.33076	1.21884	2.32759	2.35063	5e-05	0.000280515	yes
JADE3	ENSG00000102221	con72	vir72	OK	13.8348	32.1962	1.21859	2.32719	2.99594	5e-05	0.000280515	yes
HSP90AA4P	ENSG00000205100	con72	vir72	OK	1.43882	3.34836	1.21857	2.32716	2.09939	5e-05	0.000280515	yes
KIAA0355	ENSG00000166398	con72	vir72	OK	34.1949	79.5488	1.21806	2.32634	2.08012	5e-05	0.000280515	yes
RP13-270P17.3	ENSG00000272688	con72	vir72	OK	1.62051	3.76884	1.21767	2.32571	1.09096	0.0118	0.0393691	yes
SHOC2	ENSG00000108061	con72	vir72	OK	32.1235	74.6981	1.21744	2.32534	3.71218	5e-05	0.000280515	yes
PHF8	ENSG00000172943	con72	vir72	OK	8.1736	18.9911	1.21628	2.32347	2.47516	5e-05	0.000280515	yes
CGRRF1	ENSG00000100532	con72	vir72	OK	29.6555	68.8834	1.21586	2.32279	2.79066	5e-05	0.000280515	yes
AC092106.1	ENSG00000224061	con72	vir72	OK	2.75401	6.39504	1.21542	2.32208	1.80825	5e-05	0.000280515	yes
KIAA0895	ENSG00000164542	con72	vir72	OK	10.0092	23.2225	1.2142	2.32012	1.98982	5e-05	0.000280515	yes
TRIM38	ENSG00000112343	con72	vir72	OK	8.43478	19.566	1.21393	2.31969	3.71654	5e-05	0.000280515	yes
EXT1	ENSG00000182197	con72	vir72	OK	20.3278	47.1456	1.21367	2.31927	2.01743	5e-05	0.000280515	yes
MIDN	ENSG00000167470	con72	vir72	OK	23.2739	53.9404	1.21265	2.31763	3.86552	5e-05	0.000280515	yes
B4GALT3	ENSG00000158850	con72	vir72	OK	46.5338	107.836	1.21248	2.31736	2.83751	5e-05	0.000280515	yes
SLMAP	ENSG00000163681	con72	vir72	OK	23.5219	54.4796	1.21171	2.31612	2.70859	5e-05	0.000280515	yes
WDR89	ENSG00000140006	con72	vir72	OK	21.4084	49.5736	1.21139	2.31561	3.17602	5e-05	0.000280515	yes
THOC5	ENSG00000100296	con72	vir72	OK	23.6211	54.6936	1.21129	2.31545	1.25795	0.00685	0.0245757	yes
FAM219A	ENSG00000164970	con72	vir72	OK	4.7487	10.995	1.21125	2.31538	3.33657	5e-05	0.000280515	yes
MAPKAP1	ENSG00000119487	con72	vir72	OK	36.2667	83.93	1.21054	2.31424	3.63553	5e-05	0.000280515	yes
ATG4A	ENSG00000101844	con72	vir72	OK	9.62836	22.2822	1.21053	2.31423	3.05922	5e-05	0.000280515	yes
RGMB	ENSG00000174136	con72	vir72	OK	5.04942	11.6842	1.21038	2.31399	3.24263	5e-05	0.000280515	yes
TLK2P1	ENSG00000226049	con72	vir72	OK	7.94502	18.3835	1.21029	2.31384	3.59239	5e-05	0.000280515	yes
HAUS6	ENSG00000147874	con72	vir72	OK	5.63045	13.0154	1.2089	2.31161	3.49039	5e-05	0.000280515	yes
MARS2	ENSG00000247626	con72	vir72	OK	10.0906	23.3207	1.20859	2.31112	3.51204	5e-05	0.000280515	yes
CDKAL1	ENSG00000145996	con72	vir72	OK	12.3545	28.5262	1.20725	2.30897	3.70761	5e-05	0.000280515	yes
SNRPG	ENSG00000143977	con72	vir72	OK	101.771	234.977	1.20718	2.30886	3.43233	5e-05	0.000280515	yes
NIPBL	ENSG00000164190	con72	vir72	OK	14.4195	33.273	1.20634	2.30751	2.12622	5e-05	0.000280515	yes
SLC41A1	ENSG00000133065	con72	vir72	OK	26.8216	61.85	1.20538	2.30598	3.02029	5e-05	0.000280515	yes
B3GALNT2	ENSG00000162885	con72	vir72	OK	37.5657	86.6242	1.20536	2.30595	2.42193	5e-05	0.000280515	yes
CTA-29F11.1	ENSG00000260708	con72	vir72	OK	8.70171	20.0626	1.20513	2.30558	2.63493	5e-05	0.000280515	yes
GS1-309P15.4	ENSG00000238247	con72	vir72	OK	0.775354	1.78758	1.20508	2.3055	1.9811	5e-05	0.000280515	yes
STT3A	ENSG00000134910	con72	vir72	OK	382.621	881.907	1.20471	2.30491	2.90953	5e-05	0.000280515	yes
PHF5A	ENSG00000100410	con72	vir72	OK	57.8497	133.303	1.20433	2.3043	3.78543	5e-05	0.000280515	yes
TCEAL3	ENSG00000196507	con72	vir72	OK	7.92959	18.2647	1.20374	2.30336	2.42124	5e-05	0.000280515	yes
RNF168	ENSG00000163961	con72	vir72	OK	6.70444	15.4375	1.20325	2.30258	3.74159	5e-05	0.000280515	yes
WDR55	ENSG00000120314	con72	vir72	OK	7.27802	16.7561	1.20307	2.30229	1.67745	0.0001	0.000538822	yes
UBE2F	ENSG00000184182	con72	vir72	OK	14.3315	32.9859	1.20266	2.30164	2.61797	5e-05	0.000280515	yes
ZNF259P1	ENSG00000219565	con72	vir72	OK	1.30248	2.99768	1.20258	2.30151	2.04013	5e-05	0.000280515	yes
ASAP1	ENSG00000153317	con72	vir72	OK	6.48272	14.9074	1.20136	2.29956	2.00562	5e-05	0.000280515	yes
SDCBPP2	ENSG00000247570	con72	vir72	OK	11.8517	27.2013	1.19857	2.29512	2.85052	5e-05	0.000280515	yes
ARIH2	ENSG00000177479	con72	vir72	OK	68.2432	156.603	1.19835	2.29477	1.26237	0.00145	0.00621209	yes
CDV3	ENSG00000091527	con72	vir72	OK	155.076	355.843	1.19827	2.29464	3.17147	5e-05	0.000280515	yes
MPP5	ENSG00000072415	con72	vir72	OK	24.8819	57.062	1.19743	2.29331	1.54486	0.0001	0.000538822	yes
STAT5B	ENSG00000173757	con72	vir72	OK	14.2547	32.6781	1.19689	2.29245	2.51808	5e-05	0.000280515	yes
PPP2CA	ENSG00000113575	con72	vir72	OK	45.964	105.346	1.19656	2.29193	1.84015	5e-05	0.000280515	yes
GLRX2	ENSG00000023572	con72	vir72	OK	6.36289	14.5831	1.19654	2.29189	2.4227	5e-05	0.000280515	yes
GPATCH1	ENSG00000076650	con72	vir72	OK	3.93188	9.0046	1.19544	2.29015	2.64623	5e-05	0.000280515	yes
NAA16	ENSG00000172766	con72	vir72	OK	12.8358	29.3778	1.19455	2.28873	2.55933	5e-05	0.000280515	yes
TBP	ENSG00000112592	con72	vir72	OK	18.6451	42.662	1.19415	2.2881	3.13256	5e-05	0.000280515	yes
IFNGR2	ENSG00000159128	con72	vir72	OK	49.7655	113.831	1.19368	2.28735	3.01742	5e-05	0.000280515	yes
HARS2	ENSG00000112855	con72	vir72	OK	10.1809	23.2863	1.19362	2.28726	1.14005	0.00085	0.0038374	yes
ZNF746	ENSG00000181220	con72	vir72	OK	2.75295	6.29627	1.19352	2.2871	1.95699	5e-05	0.000280515	yes
KIAA0368	ENSG00000136813	con72	vir72	OK	35.8789	82.0517	1.1934	2.28691	3.17825	5e-05	0.000280515	yes
GTF2H1	ENSG00000110768	con72	vir72	OK	30.6949	70.1426	1.19229	2.28515	3.09003	5e-05	0.000280515	yes
RBBP6	ENSG00000122257	con72	vir72	OK	19.4782	44.4913	1.19166	2.28415	1.87405	5e-05	0.000280515	yes
DDIT3	ENSG00000175197	con72	vir72	OK	210.447	480.468	1.19098	2.28308	2.09469	0.0001	0.000538822	yes
ZNF587	ENSG00000198466	con72	vir72	OK	17.731	40.4686	1.19053	2.28237	1.55894	5e-05	0.000280515	yes
ZDHHC9	ENSG00000188706	con72	vir72	OK	24.1921	55.1483	1.18878	2.2796	3.44705	5e-05	0.000280515	yes
F11R	ENSG00000158769	con72	vir72	OK	66.495	151.506	1.18806	2.27846	2.40722	5e-05	0.000280515	yes
ELF1	ENSG00000120690	con72	vir72	OK	66.3618	151.143	1.18749	2.27756	3.50091	5e-05	0.000280515	yes
CDADC1	ENSG00000102543	con72	vir72	OK	13.4271	30.5576	1.18639	2.27583	2.37596	5e-05	0.000280515	yes
TRPC4AP	ENSG00000100991	con72	vir72	OK	18.336	41.7211	1.18609	2.27535	3.84534	5e-05	0.000280515	yes
EXOSC6	ENSG00000223496	con72	vir72	OK	7.42949	16.902	1.18586	2.27499	2.81033	5e-05	0.000280515	yes
METTL21B	ENSG00000123427	con72	vir72	OK	8.37455	19.0451	1.18534	2.27417	1.76008	0.0001	0.000538822	yes
RNASEH1P2	ENSG00000231458	con72	vir72	OK	1.18368	2.69151	1.18514	2.27385	1.8322	5e-05	0.000280515	yes
GRB10	ENSG00000106070	con72	vir72	OK	19.1336	43.5001	1.18491	2.27349	2.55553	5e-05	0.000280515	yes
UBE2J2	ENSG00000160087	con72	vir72	OK	13.4662	30.6102	1.18468	2.27313	2.47961	5e-05	0.000280515	yes
FRMD8	ENSG00000126391	con72	vir72	OK	3.53991	8.04076	1.18362	2.27146	2.64118	5e-05	0.000280515	yes
PHC3	ENSG00000173889	con72	vir72	OK	34.1796	77.5616	1.18221	2.26924	1.56078	0.0008	0.00363136	yes
RSPRY1	ENSG00000159579	con72	vir72	OK	30.0595	68.2042	1.18204	2.26897	3.39109	5e-05	0.000280515	yes
ISCA1P1	ENSG00000217416	con72	vir72	OK	19.571	44.3964	1.18173	2.26849	2.26153	5e-05	0.000280515	yes
ZNF516	ENSG00000101493	con72	vir72	OK	3.55514	8.0644	1.18166	2.26838	2.05908	5e-05	0.000280515	yes
CAMSAP2	ENSG00000118200	con72	vir72	OK	14.2297	32.2739	1.18146	2.26806	2.93649	5e-05	0.000280515	yes
CHD7	ENSG00000171316	con72	vir72	OK	5.93028	13.4498	1.18141	2.26798	1.68382	5e-05	0.000280515	yes
NDUFV3	ENSG00000160194	con72	vir72	OK	23.4106	53.0937	1.18138	2.26794	2.5751	5e-05	0.000280515	yes
PPARG	ENSG00000132170	con72	vir72	OK	23.6236	53.574	1.1813	2.26781	2.50616	5e-05	0.000280515	yes
TRIM37	ENSG00000108395	con72	vir72	OK	16.7249	37.9181	1.18089	2.26717	2.07887	5e-05	0.000280515	yes
PDGFB	ENSG00000100311	con72	vir72	OK	1.30327	2.9546	1.18082	2.26706	1.54136	0.001	0.00444512	yes
WAC	ENSG00000095787	con72	vir72	OK	105.236	238.531	1.18056	2.26665	3.62392	5e-05	0.000280515	yes
FTH1P23	ENSG00000242960	con72	vir72	OK	40.2901	91.2729	1.17976	2.26539	1.20936	0.0041	0.0156615	yes
C10orf76	ENSG00000120029	con72	vir72	OK	10.7841	24.4253	1.17947	2.26494	2.65655	5e-05	0.000280515	yes
FAM135A	ENSG00000082269	con72	vir72	OK	23.808	53.9215	1.17942	2.26486	2.45972	5e-05	0.000280515	yes
RP11-641A6.9	ENSG00000257675	con72	vir72	OK	0.776243	1.75807	1.17941	2.26484	1.83097	5e-05	0.000280515	yes
TTPAL	ENSG00000124120	con72	vir72	OK	13.3976	30.342	1.17934	2.26473	3.63016	5e-05	0.000280515	yes
OCLN	ENSG00000197822	con72	vir72	OK	49.6666	112.45	1.17894	2.2641	3.56763	5e-05	0.000280515	yes
PITPNB	ENSG00000180957	con72	vir72	OK	140.78	318.618	1.17839	2.26324	2.5501	5e-05	0.000280515	yes
BRPF3	ENSG00000096070	con72	vir72	OK	15.1237	34.2258	1.17828	2.26307	2.77424	5e-05	0.000280515	yes
ATP2B1	ENSG00000070961	con72	vir72	OK	42.9621	97.1966	1.17784	2.26238	2.33506	5e-05	0.000280515	yes
ZFYVE1	ENSG00000165861	con72	vir72	OK	4.25787	9.62991	1.17739	2.26167	1.88667	5e-05	0.000280515	yes
CRLF3	ENSG00000176390	con72	vir72	OK	7.79416	17.6215	1.17687	2.26086	2.95072	5e-05	0.000280515	yes
CDK11A	ENSG00000008128	con72	vir72	OK	7.58252	17.1408	1.17668	2.26056	1.84155	5e-05	0.000280515	yes
SLC33A1	ENSG00000169359	con72	vir72	OK	39.8661	90.1098	1.17652	2.26031	2.31952	5e-05	0.000280515	yes
ZXDB	ENSG00000198455	con72	vir72	OK	6.1254	13.8367	1.17562	2.2589	3.49499	5e-05	0.000280515	yes
SNX19	ENSG00000120451	con72	vir72	OK	10.0542	22.7067	1.17532	2.25843	2.54611	5e-05	0.000280515	yes
MED13	ENSG00000108510	con72	vir72	OK	29.1932	65.913	1.17493	2.25782	2.91338	5e-05	0.000280515	yes
ZNF702P	ENSG00000242779	con72	vir72	OK	13.3213	30.0673	1.17446	2.25708	1.89654	5e-05	0.000280515	yes
C8orf76	ENSG00000189376	con72	vir72	OK	11.8661	26.7594	1.17321	2.25513	1.52422	0.00045	0.00215616	yes
TLK2	ENSG00000146872	con72	vir72	OK	6.74672	15.1983	1.17166	2.25271	1.37832	0.0003	0.00148912	yes
JARID2	ENSG00000008083	con72	vir72	OK	4.11925	9.27643	1.17119	2.25197	3.37735	5e-05	0.000280515	yes
AIMP1	ENSG00000164022	con72	vir72	OK	37.4737	84.3895	1.17119	2.25197	3.47406	5e-05	0.000280515	yes
HUS1	ENSG00000136273	con72	vir72	OK	16.843	37.9151	1.17063	2.2511	2.81308	5e-05	0.000280515	yes
FNTA	ENSG00000168522	con72	vir72	OK	23.0777	51.925	1.16993	2.25001	1.77298	5e-05	0.000280515	yes
ARCN1	ENSG00000095139	con72	vir72	OK	129.7	291.799	1.1698	2.24981	2.89428	5e-05	0.000280515	yes
FBXO34	ENSG00000178974	con72	vir72	OK	19.9077	44.7767	1.16942	2.24921	3.71516	5e-05	0.000280515	yes
SQLE	ENSG00000104549	con72	vir72	OK	46.3222	104.184	1.16936	2.24912	3.6288	5e-05	0.000280515	yes
DUSP14	ENSG00000161326	con72	vir72	OK	26.2765	59.0991	1.16936	2.24912	3.59763	5e-05	0.000280515	yes
BET1	ENSG00000105829	con72	vir72	OK	64.8866	145.906	1.16904	2.24862	3.3427	5e-05	0.000280515	yes
ZNF462	ENSG00000148143	con72	vir72	OK	1.56932	3.52804	1.16873	2.24814	1.33581	5e-05	0.000280515	yes
PSMC4	ENSG00000013275	con72	vir72	OK	43.115	96.9229	1.16865	2.24801	3.55113	5e-05	0.000280515	yes
SLK	ENSG00000065613	con72	vir72	OK	18.1021	40.6935	1.16864	2.248	4.06431	5e-05	0.000280515	yes
PCGF1	ENSG00000115289	con72	vir72	OK	27.8484	62.5986	1.16853	2.24783	2.12031	5e-05	0.000280515	yes
HERC1	ENSG00000103657	con72	vir72	OK	4.64296	10.4334	1.16809	2.24714	1.09088	5e-05	0.000280515	yes
ANXA5	ENSG00000164111	con72	vir72	OK	94.7418	212.867	1.16788	2.24681	3.9422	5e-05	0.000280515	yes
RDH11	ENSG00000072042	con72	vir72	OK	204.066	458.388	1.16753	2.24627	2.40937	5e-05	0.000280515	yes
ARIH2P1	ENSG00000266296	con72	vir72	OK	0.971546	2.18218	1.16742	2.2461	1.92049	5e-05	0.000280515	yes
PRKAG2	ENSG00000106617	con72	vir72	OK	11.038	24.7891	1.16722	2.24579	2.81976	5e-05	0.000280515	yes
FBXO33	ENSG00000165355	con72	vir72	OK	6.3766	14.3142	1.16659	2.2448	3.15123	5e-05	0.000280515	yes
ALG5	ENSG00000120697	con72	vir72	OK	74.3252	166.611	1.16456	2.24165	2.22302	5e-05	0.000280515	yes
PITPNM2	ENSG00000090975	con72	vir72	OK	1.90186	4.26118	1.16384	2.24053	1.13758	0.0013	0.00562895	yes
RP11-640M9.2	ENSG00000225241	con72	vir72	OK	1.53669	3.44219	1.1635	2.24	1.53497	5e-05	0.000280515	yes
CGNL1	ENSG00000128849	con72	vir72	OK	0.934624	2.09319	1.16324	2.2396	1.83344	5e-05	0.000280515	yes
GPATCH2L	ENSG00000089916	con72	vir72	OK	15.9606	35.7277	1.16253	2.2385	1.53068	5e-05	0.000280515	yes
B3GNT2	ENSG00000170340	con72	vir72	OK	23.1175	51.7405	1.16231	2.23816	3.75519	5e-05	0.000280515	yes
DST	ENSG00000151914	con72	vir72	OK	10.254	22.944	1.16193	2.23757	1.62787	5e-05	0.000280515	yes
CTB-95D12.1	ENSG00000270442	con72	vir72	OK	0.487919	1.09171	1.16188	2.23749	1.9511	5e-05	0.000280515	yes
ANKLE2	ENSG00000176915	con72	vir72	OK	21.4066	47.895	1.16182	2.2374	2.65415	5e-05	0.000280515	yes
HNRNPLL	ENSG00000143889	con72	vir72	OK	28.7107	64.2266	1.16158	2.23702	3.28999	5e-05	0.000280515	yes
TTC27	ENSG00000018699	con72	vir72	OK	20.0929	44.8979	1.15997	2.23453	2.29179	5e-05	0.000280515	yes
ZNF17	ENSG00000186272	con72	vir72	OK	3.42697	7.65354	1.15919	2.23332	1.11476	0.00075	0.00342499	yes
FOXRED1	ENSG00000110074	con72	vir72	OK	11.5507	25.7898	1.15882	2.23275	0.669675	0.00555	0.0204469	yes
FTH1P10	ENSG00000223361	con72	vir72	OK	47.7919	106.648	1.15802	2.23151	3.14373	5e-05	0.000280515	yes
KIAA0947	ENSG00000164151	con72	vir72	OK	9.6003	21.4201	1.15781	2.23118	3.02337	5e-05	0.000280515	yes
CREB1	ENSG00000118260	con72	vir72	OK	17.7763	39.6519	1.15743	2.2306	2.18246	5e-05	0.000280515	yes
RPS6KA1	ENSG00000117676	con72	vir72	OK	23.6455	52.7296	1.15705	2.23001	2.58762	5e-05	0.000280515	yes
AC027612.6	ENSG00000143429	con72	vir72	OK	10.8056	24.0959	1.157	2.22993	2.19331	5e-05	0.000280515	yes
PSMD7	ENSG00000103035	con72	vir72	OK	33.489	74.6715	1.15687	2.22973	3.63581	5e-05	0.000280515	yes
CBWD1	ENSG00000172785	con72	vir72	OK	19.7002	43.9239	1.1568	2.22962	3.13466	5e-05	0.000280515	yes
SOS2	ENSG00000100485	con72	vir72	OK	8.47498	18.8955	1.15676	2.22956	3.13201	5e-05	0.000280515	yes
RAB5A	ENSG00000144566	con72	vir72	OK	46.523	103.694	1.15632	2.22888	3.66846	5e-05	0.000280515	yes
RASEF	ENSG00000165105	con72	vir72	OK	17.3483	38.6331	1.15504	2.2269	3.9892	5e-05	0.000280515	yes
GOLT1B	ENSG00000111711	con72	vir72	OK	100.496	223.79	1.155	2.22684	2.77672	5e-05	0.000280515	yes
ETV5	ENSG00000244405	con72	vir72	OK	54.122	120.501	1.15476	2.22647	3.39603	5e-05	0.000280515	yes
C19orf10	ENSG00000074842	con72	vir72	OK	45.5208	101.345	1.15467	2.22633	3.22722	5e-05	0.000280515	yes
ZNF211	ENSG00000121417	con72	vir72	OK	6.67402	14.8521	1.15404	2.22536	2.80522	5e-05	0.000280515	yes
WSB1	ENSG00000109046	con72	vir72	OK	34.0426	75.7433	1.15378	2.22496	3.53373	5e-05	0.000280515	yes
ZNF354A	ENSG00000169131	con72	vir72	OK	7.38687	16.4348	1.15372	2.22487	3.20231	5e-05	0.000280515	yes
BTN2A1	ENSG00000112763	con72	vir72	OK	14.6502	32.5921	1.1536	2.22468	2.05374	5e-05	0.000280515	yes
LRRC42	ENSG00000116212	con72	vir72	OK	40.3257	89.7096	1.15356	2.22462	3.28804	5e-05	0.000280515	yes
TMEM11	ENSG00000178307	con72	vir72	OK	14.0472	31.2401	1.15312	2.22394	2.84001	5e-05	0.000280515	yes
KCTD7,RABGEF1	ENSG00000154710	con72	vir72	OK	13.3774	29.7346	1.15235	2.22276	2.47488	5e-05	0.000280515	yes
RNASEH1	ENSG00000171865	con72	vir72	OK	6.62258	14.7173	1.15205	2.22229	2.10008	5e-05	0.000280515	yes
NAA35	ENSG00000135040	con72	vir72	OK	24.5789	54.6114	1.15178	2.22188	3.7826	5e-05	0.000280515	yes
ZNF259	ENSG00000109917	con72	vir72	OK	20.8935	46.4119	1.15144	2.22136	2.89272	5e-05	0.000280515	yes
PIP4K2A	ENSG00000150867	con72	vir72	OK	17.9709	39.8986	1.15068	2.22019	2.11466	5e-05	0.000280515	yes
DUSP12	ENSG00000081721	con72	vir72	OK	15.4382	34.2558	1.14984	2.21889	3.03656	5e-05	0.000280515	yes
KANSL2	ENSG00000139620	con72	vir72	OK	46.3741	102.899	1.14984	2.21889	2.28116	5e-05	0.000280515	yes
PPP1R3B	ENSG00000173281	con72	vir72	OK	12.1482	26.9546	1.14979	2.21882	3.81852	5e-05	0.000280515	yes
DNAJC2	ENSG00000105821	con72	vir72	OK	15.538	34.4631	1.14925	2.21799	1.5402	0.0011	0.00484329	yes
GRPEL2	ENSG00000164284	con72	vir72	OK	42.6744	94.6072	1.14858	2.21696	3.95798	5e-05	0.000280515	yes
HOMER1	ENSG00000152413	con72	vir72	OK	10.7689	23.8676	1.14819	2.21636	2.26891	5e-05	0.000280515	yes
RP3-437C15.1	ENSG00000232702	con72	vir72	OK	53.9098	119.48	1.14815	2.2163	2.85929	5e-05	0.000280515	yes
SIK3	ENSG00000160584	con72	vir72	OK	13.8167	30.62	1.14806	2.21616	1.61784	5e-05	0.000280515	yes
RP11-30P6.1	ENSG00000217060	con72	vir72	OK	2.30515	5.10629	1.14741	2.21516	2.18399	5e-05	0.000280515	yes
NEU1	ENSG00000204386	con72	vir72	OK	20.983	46.4772	1.1473	2.21499	3.20449	5e-05	0.000280515	yes
SACS	ENSG00000151835	con72	vir72	OK	3.55619	7.87284	1.14655	2.21384	2.70189	5e-05	0.000280515	yes
RARS	ENSG00000113643	con72	vir72	OK	79.3267	175.557	1.14607	2.2131	2.22906	5e-05	0.000280515	yes
SMOX	ENSG00000088826	con72	vir72	OK	4.33372	9.58881	1.14575	2.21261	1.53562	5e-05	0.000280515	yes
LTV1	ENSG00000135521	con72	vir72	OK	16.9626	37.5155	1.14513	2.21166	2.53215	5e-05	0.000280515	yes
KRT10	ENSG00000186395	con72	vir72	OK	4.32312	9.56053	1.14502	2.21149	1.93657	5e-05	0.000280515	yes
USO1	ENSG00000138768	con72	vir72	OK	355.597	786.375	1.14498	2.21143	1.41816	0.00025	0.00125904	yes
CRTC2	ENSG00000160741	con72	vir72	OK	10.8034	23.8879	1.14479	2.21114	1.61828	5e-05	0.000280515	yes
GYG1	ENSG00000163754	con72	vir72	OK	35.2004	77.8302	1.14474	2.21106	3.00428	5e-05	0.000280515	yes
FTH1P16	ENSG00000227376	con72	vir72	OK	30.4323	67.262	1.14419	2.21022	1.10856	0.0118	0.0393691	yes
RARA	ENSG00000131759	con72	vir72	OK	7.35282	16.2448	1.14361	2.20933	2.25444	5e-05	0.000280515	yes
CARKD	ENSG00000213995	con72	vir72	OK	25.0692	55.3764	1.14335	2.20893	3.38173	5e-05	0.000280515	yes
CELF1	ENSG00000149187	con72	vir72	OK	61.104	134.87	1.14223	2.20722	2.10156	5e-05	0.000280515	yes
UBE2E2	ENSG00000182247	con72	vir72	OK	39.5789	87.336	1.14185	2.20664	3.67091	5e-05	0.000280515	yes
AP1G1	ENSG00000166747	con72	vir72	OK	51.6595	113.952	1.14133	2.20584	2.04036	5e-05	0.000280515	yes
SPRYD3	ENSG00000167778	con72	vir72	OK	9.73982	21.4764	1.14078	2.205	3.16192	5e-05	0.000280515	yes
HLA-E	ENSG00000204592	con72	vir72	OK	59.0264	130.049	1.13962	2.20323	3.91402	5e-05	0.000280515	yes
FAM49B	ENSG00000153310	con72	vir72	OK	46.9562	103.33	1.13787	2.20056	3.36614	5e-05	0.000280515	yes
BICD2	ENSG00000185963	con72	vir72	OK	3.78261	8.31394	1.13615	2.19794	3.3304	5e-05	0.000280515	yes
BTN2A2	ENSG00000124508	con72	vir72	OK	9.33684	20.5141	1.13561	2.19711	1.98628	5e-05	0.000280515	yes
CNKSR3	ENSG00000153721	con72	vir72	OK	3.46046	7.59445	1.13398	2.19463	1.87106	5e-05	0.000280515	yes
SPATA13	ENSG00000182957	con72	vir72	OK	6.40773	14.0618	1.13389	2.1945	1.51587	5e-05	0.000280515	yes
SRRT	ENSG00000087087	con72	vir72	OK	17.8293	39.1137	1.13343	2.1938	1.83804	5e-05	0.000280515	yes
CHUK	ENSG00000213341	con72	vir72	OK	25.9431	56.9127	1.1334	2.19375	2.03764	5e-05	0.000280515	yes
PIBF1	ENSG00000083535	con72	vir72	OK	30.5243	66.9415	1.13294	2.19305	1.88811	5e-05	0.000280515	yes
FNTAL1	ENSG00000254502	con72	vir72	OK	2.04808	4.49002	1.13245	2.19231	2.04484	5e-05	0.000280515	yes
DAXX	ENSG00000204209	con72	vir72	OK	35.9425	78.7929	1.13238	2.1922	2.19856	5e-05	0.000280515	yes
FASTKD5	ENSG00000215251	con72	vir72	OK	10.5924	23.2039	1.13133	2.19061	2.72118	5e-05	0.000280515	yes
AMPD3	ENSG00000133805	con72	vir72	OK	6.15556	13.4691	1.12969	2.18812	2.79802	5e-05	0.000280515	yes
CCDC174	ENSG00000154781	con72	vir72	OK	17.8784	39.1163	1.12955	2.1879	2.42978	5e-05	0.000280515	yes
CMTM3	ENSG00000140931	con72	vir72	OK	0.728435	1.59202	1.12799	2.18554	1.01482	0.0003	0.00148912	yes
SDCBPP3	ENSG00000232801	con72	vir72	OK	3.87879	8.47635	1.12784	2.18531	2.11736	5e-05	0.000280515	yes
CA2	ENSG00000104267	con72	vir72	OK	29.6099	64.7021	1.12773	2.18515	3.30605	5e-05	0.000280515	yes
IL11	ENSG00000095752	con72	vir72	OK	2.21254	4.83244	1.12705	2.18412	2.16167	5e-05	0.000280515	yes
SAR1A	ENSG00000079332	con72	vir72	OK	97.1286	212.055	1.12647	2.18324	3.68114	5e-05	0.000280515	yes
SLC25A4	ENSG00000151729	con72	vir72	OK	7.94664	17.3486	1.1264	2.18313	2.71264	5e-05	0.000280515	yes
PLEKHM2	ENSG00000116786	con72	vir72	OK	7.25541	15.8315	1.12567	2.18203	1.28476	0.0012	0.00523774	yes
DNAJA4	ENSG00000140403	con72	vir72	OK	15.235	33.2335	1.12525	2.18139	1.90612	5e-05	0.000280515	yes
C2orf69	ENSG00000178074	con72	vir72	OK	19.9021	43.397	1.12468	2.18053	2.8462	5e-05	0.000280515	yes
NUFIP1P	ENSG00000218890	con72	vir72	OK	4.61895	10.0699	1.12441	2.18012	2.59112	5e-05	0.000280515	yes
SLC41A2	ENSG00000136052	con72	vir72	OK	21.1352	46.0644	1.124	2.1795	2.13359	5e-05	0.000280515	yes
NDUFAF5	ENSG00000101247	con72	vir72	OK	7.44234	16.216	1.12359	2.17888	1.83732	5e-05	0.000280515	yes
CCDC130	ENSG00000104957	con72	vir72	OK	11.0718	24.1195	1.12331	2.17846	2.3568	5e-05	0.000280515	yes
SLC1A4	ENSG00000115902	con72	vir72	OK	17.9183	39.0063	1.12227	2.17689	3.67087	5e-05	0.000280515	yes
PRMT10	ENSG00000164169	con72	vir72	OK	7.40962	16.1295	1.12223	2.17683	1.98002	5e-05	0.000280515	yes
FRMD4B	ENSG00000114541	con72	vir72	OK	17.4987	38.0578	1.12095	2.1749	1.44016	0.0005	0.00237265	yes
ANKRD29	ENSG00000154065	con72	vir72	OK	0.670018	1.45581	1.11955	2.17279	1.23371	0.0005	0.00237265	yes
UGDH	ENSG00000109814	con72	vir72	OK	115.053	249.848	1.11874	2.17157	2.46135	5e-05	0.000280515	yes
WDR3	ENSG00000065183	con72	vir72	OK	64.1026	139.172	1.11842	2.17109	2.23231	5e-05	0.000280515	yes
SLC25A19	ENSG00000125454	con72	vir72	OK	14.41	31.2836	1.11834	2.17097	2.2966	5e-05	0.000280515	yes
STK35	ENSG00000125834	con72	vir72	OK	19.4886	42.2965	1.11791	2.17032	3.7906	5e-05	0.000280515	yes
TMEM167B	ENSG00000215717	con72	vir72	OK	42.1395	91.4169	1.11729	2.16939	3.00044	5e-05	0.000280515	yes
AC016724.6	ENSG00000232090	con72	vir72	OK	2.26203	4.90623	1.11699	2.16894	1.46349	0.00085	0.0038374	yes
RP11-71H17.9	ENSG00000272947	con72	vir72	OK	1.70707	3.70215	1.11684	2.16871	1.73472	5e-05	0.000280515	yes
STARD5	ENSG00000172345	con72	vir72	OK	4.25201	9.21306	1.11553	2.16675	1.83856	0.0001	0.000538822	yes
HAUS6P1	ENSG00000227344	con72	vir72	OK	6.69281	14.4974	1.11511	2.16612	2.67222	5e-05	0.000280515	yes
USP49	ENSG00000164663	con72	vir72	OK	6.70284	14.5184	1.11504	2.16601	1.11501	0.0098	0.0335194	yes
QDPR	ENSG00000151552	con72	vir72	OK	14.9303	32.3226	1.11429	2.16488	2.98619	5e-05	0.000280515	yes
EGLN2	ENSG00000269858	con72	vir72	OK	11.5753	25.0566	1.11414	2.16466	2.23954	5e-05	0.000280515	yes
PCGF6	ENSG00000156374	con72	vir72	OK	1.98682	4.29969	1.11377	2.1641	2.1463	5e-05	0.000280515	yes
HSPA5	ENSG00000044574	con72	vir72	OK	342.527	739.144	1.10964	2.15792	3.14304	5e-05	0.000280515	yes
DGKA	ENSG00000065357	con72	vir72	OK	21.1709	45.6675	1.10909	2.1571	1.73853	5e-05	0.000280515	yes
PRKAB2	ENSG00000131791	con72	vir72	OK	21.6461	46.6309	1.10718	2.15424	3.32457	5e-05	0.000280515	yes
ING1	ENSG00000153487	con72	vir72	OK	8.03597	17.3113	1.10717	2.15423	2.48201	5e-05	0.000280515	yes
BAZ1A	ENSG00000198604	con72	vir72	OK	9.84222	21.1903	1.10635	2.153	2.05101	5e-05	0.000280515	yes
SPAG9	ENSG00000008294	con72	vir72	OK	69.7037	149.959	1.10526	2.15138	1.83329	5e-05	0.000280515	yes
SGMS1	ENSG00000198964	con72	vir72	OK	11.237	24.1391	1.10311	2.14817	2.50807	5e-05	0.000280515	yes
ABCA11P	ENSG00000251595	con72	vir72	OK	5.34258	11.4708	1.10235	2.14704	1.17976	0.00575	0.0210904	yes
AMMECR1L	ENSG00000144233	con72	vir72	OK	19.5555	41.9773	1.10203	2.14657	3.76632	5e-05	0.000280515	yes
RP11-39C10.1	ENSG00000250746	con72	vir72	OK	2.21374	4.75189	1.10202	2.14655	1.93574	5e-05	0.000280515	yes
PSMG3	ENSG00000157778	con72	vir72	OK	19.6	42.0719	1.102	2.14652	2.75729	5e-05	0.000280515	yes
PER2	ENSG00000132326	con72	vir72	OK	5.96665	12.7991	1.10105	2.14511	2.88245	5e-05	0.000280515	yes
PGS1	ENSG00000087157	con72	vir72	OK	5.8473	12.5385	1.10052	2.14432	1.66401	0.0001	0.000538822	yes
LMO4	ENSG00000143013	con72	vir72	OK	28.3935	60.877	1.10034	2.14405	3.03791	5e-05	0.000280515	yes
BCL2L10	ENSG00000137875	con72	vir72	OK	0.569316	1.22014	1.09975	2.14318	1.43598	0.0004	0.00193713	yes
ARNT	ENSG00000143437	con72	vir72	OK	34.4281	73.7683	1.09942	2.14269	2.19222	5e-05	0.000280515	yes
DHCR7	ENSG00000172893	con72	vir72	OK	123.409	264.302	1.09874	2.14168	2.51088	5e-05	0.000280515	yes
RP11-651P23.4	ENSG00000224831	con72	vir72	OK	15.5227	33.2097	1.09723	2.13944	1.1542	0.01255	0.041493	yes
EYA3	ENSG00000158161	con72	vir72	OK	11.125	23.7993	1.09712	2.13927	2.96092	5e-05	0.000280515	yes
EMC8	ENSG00000131148	con72	vir72	OK	15.6486	33.4725	1.09695	2.13902	1.34025	0.00155	0.00659446	yes
FAM86DP	ENSG00000244026	con72	vir72	OK	4.02737	8.61386	1.09682	2.13883	2.27326	5e-05	0.000280515	yes
MB21D2	ENSG00000180611	con72	vir72	OK	4.05763	8.6759	1.09638	2.13818	2.79073	5e-05	0.000280515	yes
PAIP2	ENSG00000120727	con72	vir72	OK	84.4301	180.497	1.09614	2.13782	3.26933	5e-05	0.000280515	yes
PGBD1	ENSG00000137338	con72	vir72	OK	1.82107	3.89287	1.09605	2.13769	2.44336	5e-05	0.000280515	yes
TTLL4	ENSG00000135912	con72	vir72	OK	11.5022	24.5826	1.09573	2.13721	1.79522	0.00015	0.000786087	yes
MTCH1	ENSG00000137409	con72	vir72	OK	62.852	134.313	1.09557	2.13697	3.68062	5e-05	0.000280515	yes
TSR1	ENSG00000167721	con72	vir72	OK	23.3165	49.8221	1.09543	2.13677	1.98122	5e-05	0.000280515	yes
BRD9	ENSG00000028310	con72	vir72	OK	7.76233	16.5847	1.09529	2.13656	1.71222	5e-05	0.000280515	yes
SMG1	ENSG00000157106	con72	vir72	OK	11.9942	25.6125	1.09451	2.13541	2.53679	5e-05	0.000280515	yes
POLR1C	ENSG00000171453	con72	vir72	OK	90.7319	193.742	1.09446	2.13533	1.66123	0.0001	0.000538822	yes
MTO1	ENSG00000135297	con72	vir72	OK	27.0907	57.8131	1.0936	2.13406	2.55704	5e-05	0.000280515	yes
RSBN1L-AS1	ENSG00000214293	con72	vir72	OK	15.1801	32.3801	1.09292	2.13305	2.27773	5e-05	0.000280515	yes
QTRTD1	ENSG00000151576	con72	vir72	OK	50.46	107.613	1.09265	2.13265	1.72887	5e-05	0.000280515	yes
CDKN1B	ENSG00000111276	con72	vir72	OK	71.9042	153.334	1.09253	2.13248	3.87934	5e-05	0.000280515	yes
TULP3	ENSG00000078246	con72	vir72	OK	19.9399	42.5088	1.0921	2.13184	1.65086	5e-05	0.000280515	yes
SLC7A6OS	ENSG00000103061	con72	vir72	OK	6.592	14.052	1.09199	2.13168	1.13555	0.00025	0.00125904	yes
DYNC1LI1	ENSG00000144635	con72	vir72	OK	14.3951	30.6666	1.09109	2.13035	3.3228	5e-05	0.000280515	yes
MTMR3	ENSG00000100330	con72	vir72	OK	22.1417	47.1689	1.09107	2.13032	1.50183	0.0004	0.00193713	yes
ZBTB24	ENSG00000112365	con72	vir72	OK	6.30478	13.4295	1.09089	2.13005	2.96642	5e-05	0.000280515	yes
[truncated: 4,248 more rows]

## Sheet: C parvum infected cells 72 hpi
Supplementary table 1: Differentially expressed genes (DEGs) mapped to Homo sapiens in HCT-8 cells infected with BCoV, C. parvum or both agents at both 24 and 72 hpi. Positive fold-change values indicate gene upregulation in infected HCT-8 cells.
gene	gene_id	sample_1	sample_2	status	value_1	value_2	log2_FC	Fold Change (FC)	test_stat	p_value	q_value	significant
EGR1	ENSG00000120738	con72	par72	OK	86.3804	537.688	2.63799	6.22464	8.20057	5e-05	0.000280515	yes
CTGF	ENSG00000118523	con72	par72	OK	6.19593	35.5277	2.51955	5.73403	6.53054	5e-05	0.000280515	yes
FOS	ENSG00000170345	con72	par72	OK	11.6115	60.2202	2.3747	5.18628	5.82377	5e-05	0.000280515	yes
EGR2	ENSG00000122877	con72	par72	OK	1.58661	6.33184	1.99667	3.99078	4.14568	5e-05	0.000280515	yes
JUN	ENSG00000177606	con72	par72	OK	3.78019	14.559	1.94538	3.85139	5.06385	5e-05	0.000280515	yes
CYR61	ENSG00000142871	con72	par72	OK	4.84488	16.7193	1.78699	3.45094	4.46464	5e-05	0.000280515	yes
FOSB	ENSG00000125740	con72	par72	OK	1.09195	3.40686	1.64153	3.11997	1.10756	0.0039	0.0149856	yes
IER2	ENSG00000160888	con72	par72	OK	23.1487	62.2673	1.42754	2.68988	4.37441	5e-05	0.000280515	yes
ZFP36	ENSG00000128016	con72	par72	OK	22.4691	56.6226	1.33344	2.52003	3.80596	5e-05	0.000280515	yes
KLF2	ENSG00000127528	con72	par72	OK	4.48486	11.2405	1.32557	2.50632	3.00266	5e-05	0.000280515	yes
DUSP1	ENSG00000120129	con72	par72	OK	3.45841	7.98504	1.20719	2.30887	2.59028	5e-05	0.000280515	yes
RHOB	ENSG00000143878	con72	par72	OK	38.5563	76.7548	0.993293	1.99072	3.33228	5e-05	0.000280515	yes
GADD45B	ENSG00000099860	con72	par72	OK	27.6081	53.5421	0.955583	1.93936	1.81849	5e-05	0.000280515	yes
BTG2	ENSG00000159388	con72	par72	OK	31.5863	60.2686	0.932106	1.90806	3.10233	5e-05	0.000280515	yes
SIK1	ENSG00000142178	con72	par72	OK	4.22466	7.84915	0.893702	1.85794	1.93773	5e-05	0.000280515	yes
IER3	ENSG00000137331	con72	par72	OK	38.3518	68.2205	0.830911	1.77881	2.59424	5e-05	0.000280515	yes
KLF6	ENSG00000067082	con72	par72	OK	34.0195	57.464	0.756299	1.68915	2.08728	5e-05	0.000280515	yes
TRIB1	ENSG00000173334	con72	par72	OK	9.40699	15.599	0.729647	1.65823	1.77397	5e-05	0.000280515	yes
ID1	ENSG00000125968	con72	par72	OK	30.6304	50.7232	0.72768	1.65597	2.12866	5e-05	0.000280515	yes
DUSP5	ENSG00000138166	con72	par72	OK	7.8028	12.8759	0.722612	1.65017	1.91901	5e-05	0.000280515	yes
IRF2BPL	ENSG00000119669	con72	par72	OK	4.04508	6.54241	0.693653	1.61737	1.84093	5e-05	0.000280515	yes
SOWAHC	ENSG00000198142	con72	par72	OK	18.9044	29.535	0.643707	1.56234	2.18897	5e-05	0.000280515	yes
IGF2	ENSG00000167244	con72	par72	OK	9.82022	15.1958	0.629843	1.5474	1.60882	5e-05	0.000280515	yes
DUSP6	ENSG00000139318	con72	par72	OK	63.5513	95.6339	0.5896	1.50483	1.83437	5e-05	0.000280515	yes
HBEGF	ENSG00000113070	con72	par72	OK	6.89881	10.3538	0.585741	1.50081	1.43808	0.00025	0.00125904	yes
C17orf96	ENSG00000179294	con72	par72	OK	13.948	20.8921	0.582899	1.49786	1.82586	5e-05	0.000280515	yes
FASTKD1	ENSG00000138399	con72	par72	OK	14.7752	9.87304	-0.581613	-1.49652	-1.23768	0.0004	0.00193713	yes
ZNF77	ENSG00000175691	con72	par72	OK	9.4442	6.26043	-0.593168	-1.50856	-1.41887	0.0002	0.00102556	yes
AP1S2	ENSG00000182287	con72	par72	OK	6.39584	4.21791	-0.600607	-1.51635	-1.13956	0.00195	0.0080971	yes
CLK4	ENSG00000113240	con72	par72	OK	22.3473	14.6122	-0.612929	-1.52936	-1.46586	0.00025	0.00125904	yes
FAM200A	ENSG00000221909	con72	par72	OK	7.62465	4.97071	-0.61722	-1.53392	-1.0232	0.01045	0.0354386	yes
CCNC	ENSG00000112237	con72	par72	OK	116.346	75.5787	-0.622365	-1.5394	-1.59129	5e-05	0.000280515	yes
CRBN	ENSG00000113851	con72	par72	OK	65.0997	42.0065	-0.63204	-1.54975	-1.1911	0.00275	0.0109946	yes
AC092646.2	ENSG00000227738	con72	par72	OK	3.1209	2.0091	-0.635418	-1.55339	-1.03196	0.0125	0.0413502	yes
BET1	ENSG00000105829	con72	par72	OK	64.8866	41.3432	-0.650272	-1.56946	-1.84217	0.0001	0.000538822	yes
RP11-620J15.3	ENSG00000257698	con72	par72	OK	11.0009	6.98566	-0.655158	-1.57479	-1.17291	0.00435	0.0164988	yes
ITGAE	ENSG00000083457	con72	par72	OK	34.7052	21.5799	-0.685463	-1.60822	-1.31801	0.0016	0.00678703	yes
RGS2	ENSG00000116741	con72	par72	OK	2.19901	1.33339	-0.721752	-1.64918	-1.06403	0.0033	0.0129193	yes
GOLT1B	ENSG00000111711	con72	par72	OK	100.496	59.731	-0.750589	-1.68248	-1.83836	5e-05	0.000280515	yes
COMMD8	ENSG00000169019	con72	par72	OK	41.9888	24.7887	-0.760325	-1.69387	-2.15044	5e-05	0.000280515	yes
CENPK	ENSG00000123219	con72	par72	OK	45.3604	26.6868	-0.765306	-1.69973	-1.77529	5e-05	0.000280515	yes
C5orf54	ENSG00000221886	con72	par72	OK	5.25848	2.98319	-0.817789	-1.7627	-1.7536	5e-05	0.000280515	yes
ZNF441	ENSG00000197044	con72	par72	OK	3.89338	2.13924	-0.863929	-1.81999	-0.980901	0.0146	0.0472196	yes
HIST1H1D	ENSG00000124575	con72	par72	OK	5.05999	2.65838	-0.928584	-1.90341	-1.56104	0.00035	0.0017153	yes
CD58	ENSG00000116815	con72	par72	OK	15.8082	8.26658	-0.935315	-1.91231	-1.87365	5e-05	0.000280515	yes
NEIL1	ENSG00000140398	con72	par72	OK	1.38255	0.659958	-1.06688	-2.0949	-0.822571	0.00015	0.000786087	yes
HIST1H3B	ENSG00000124693	con72	par72	OK	4.84469	1.98727	-1.28561	-2.43785	-1.67174	0.00025	0.00125904	yes
HIST1H1B	ENSG00000184357	con72	par72	OK	4.29682	1.70706	-1.33175	-2.51708	-2.07904	5e-05	0.000280515	yes
RMRP	ENSG00000269900	con72	par72	OK	3370.78	1195.15	-1.49589	-2.82038	-4.97096	5e-05	0.000280515	yes
HIST2H2AC	ENSG00000184260	con72	par72	OK	3.50724	1.19782	-1.54993	-2.92803	-1.8828	0.0003	0.00148912	yes
RPPH1	ENSG00000259001	con72	par72	OK	737.03	236.975	-1.63699	-3.11016	-3.01106	5e-05	0.000280515	yes
RN7SK	ENSG00000202198	con72	par72	OK	4866.44	1546.35	-1.654	-3.14705	-5.19407	5e-05	0.000280515	yes

## Sheet: Co-infected cells 72 hpi
gene	gene_ID	sample_1	sample_2	status	value_1	value_2	log2_FC	Fold Change (FC)	test_stat	p_value	q_value	significant
IL8	ENSG00000169429	con72	vir_par72	OK	6.11023	1640.89	8.06904	268.549	14.6201	5e-05	0.000280515	yes
KIAA1239	ENSG00000174145	con72	vir_par72	OK	0.0344569	6.33447	7.52229	183.838	9.50124	5e-05	0.000280515	yes
CXCL2	ENSG00000081041	con72	vir_par72	OK	1.46431	192.212	7.03633	131.264	13.1855	5e-05	0.000280515	yes
ANKRD1	ENSG00000148677	con72	vir_par72	OK	1.00708	97.8807	6.60277	97.1923	14.0508	5e-05	0.000280515	yes
RP11-383J24.1	ENSG00000253227	con72	vir_par72	OK	0.468655	35.0838	6.22614	74.8609	6.81674	5e-05	0.000280515	yes
RSAD2	ENSG00000134321	con72	vir_par72	OK	0.212725	15.19	6.15799	71.4068	3.94077	5e-05	0.000280515	yes
CBR3	ENSG00000159231	con72	vir_par72	OK	0.360142	24.2508	6.07332	67.3366	3.39416	0.0054	0.0199635	yes
GCNT4	ENSG00000176928	con72	vir_par72	OK	0.0415628	2.53368	5.9298	60.9604	5.08126	5e-05	0.000280515	yes
DNAH17	ENSG00000187775	con72	vir_par72	OK	0.0200998	1.10968	5.78681	55.2082	0.339319	5e-05	0.000280515	yes
MMP13	ENSG00000137745	con72	vir_par72	OK	0.103202	5.16552	5.64538	50.0528	5.72498	5e-05	0.000280515	yes
EDN1	ENSG00000078401	con72	vir_par72	OK	0.645679	29.4147	5.50958	45.5563	10.5759	5e-05	0.000280515	yes
CXCL1	ENSG00000163739	con72	vir_par72	OK	0.653388	29.4195	5.49269	45.0261	8.32208	5e-05	0.000280515	yes
TM4SF1	ENSG00000169908	con72	vir_par72	OK	41.8817	1832.24	5.45114	43.7478	14.218	5e-05	0.000280515	yes
CRYAB	ENSG00000109846	con72	vir_par72	OK	0.685196	28.8831	5.39756	42.1529	2.94159	5e-05	0.000280515	yes
IL1A	ENSG00000115008	con72	vir_par72	OK	1.41382	58.6006	5.37324	41.4483	11.5638	5e-05	0.000280515	yes
CYR61	ENSG00000142871	con72	vir_par72	OK	4.84488	178.729	5.20517	36.8903	14.3068	5e-05	0.000280515	yes
SRXN1	ENSG00000271303	con72	vir_par72	OK	8.89132	311.48	5.1306	35.032	4.00914	5e-05	0.000280515	yes
C6orf141	ENSG00000197261	con72	vir_par72	OK	0.414756	13.8216	5.05852	33.3247	4.55049	5e-05	0.000280515	yes
DTNA	ENSG00000134769	con72	vir_par72	OK	0.717422	22.3471	4.96112	31.1491	3.90057	5e-05	0.000280515	yes
TNFAIP3	ENSG00000118503	con72	vir_par72	OK	1.20209	37.2336	4.95299	30.9741	6.72169	5e-05	0.000280515	yes
FSTL4	ENSG00000053108	con72	vir_par72	OK	0.177643	5.48187	4.94761	30.8588	2.84219	5e-05	0.000280515	yes
CXCL3	ENSG00000163734	con72	vir_par72	OK	3.63351	111.978	4.94571	30.8182	10.9879	5e-05	0.000280515	yes
DUSP1	ENSG00000120129	con72	vir_par72	OK	3.45841	99.1517	4.84146	28.6698	11.9959	5e-05	0.000280515	yes
DKK1	ENSG00000107984	con72	vir_par72	OK	0.440729	11.5563	4.71264	26.2208	4.20705	5e-05	0.000280515	yes
RASD1	ENSG00000108551	con72	vir_par72	OK	0.099774	2.60109	4.70431	26.0698	4.22303	5e-05	0.000280515	yes
DUSP5	ENSG00000138166	con72	vir_par72	OK	7.8028	196.956	4.65773	25.2416	13.598	5e-05	0.000280515	yes
CCRN4L	ENSG00000151014	con72	vir_par72	OK	1.84907	45.5112	4.62135	24.613	4.47962	5e-05	0.000280515	yes
PLA2G4C	ENSG00000105499	con72	vir_par72	OK	0.87277	21.1644	4.59989	24.2496	3.8415	5e-05	0.000280515	yes
TPTE2	ENSG00000132958	con72	vir_par72	OK	0.0486281	1.132	4.54094	23.2787	1.16328	0.0031	0.0122208	yes
SIK1	ENSG00000142178	con72	vir_par72	OK	4.22466	97.9975	4.53584	23.1966	11.4822	5e-05	0.000280515	yes
FOSB	ENSG00000125740	con72	vir_par72	OK	1.09195	25.13	4.52443	23.0138	3.62004	5e-05	0.000280515	yes
ZC3H12A	ENSG00000163874	con72	vir_par72	OK	1.994	45.6172	4.51584	22.8772	6.14065	5e-05	0.000280515	yes
CSGALNACT1	ENSG00000147408	con72	vir_par72	OK	0.0761939	1.73082	4.50564	22.716	0.706193	5e-05	0.000280515	yes
AOC3	ENSG00000131471	con72	vir_par72	OK	0.249095	5.35705	4.42667	21.506	3.81906	5e-05	0.000280515	yes
NEURL3	ENSG00000163121	con72	vir_par72	OK	0.872565	18.7353	4.42436	21.4716	8.00476	5e-05	0.000280515	yes
GEM	ENSG00000164949	con72	vir_par72	OK	5.51859	118.348	4.42259	21.4453	11.9113	5e-05	0.000280515	yes
OSGIN1	ENSG00000140961	con72	vir_par72	OK	4.3359	91.9754	4.40685	21.2126	5.70661	5e-05	0.000280515	yes
C4orf19	ENSG00000154274	con72	vir_par72	OK	1.88862	38.8761	4.36348	20.5844	7.04362	5e-05	0.000280515	yes
PLAGL1	ENSG00000118495	con72	vir_par72	OK	0.430318	8.68359	4.33482	20.1795	6.08845	5e-05	0.000280515	yes
TINCR	ENSG00000223573	con72	vir_par72	OK	0.18532	3.66705	4.30653	19.7877	3.12263	5e-05	0.000280515	yes
LINC00431	ENSG00000225760	con72	vir_par72	OK	0.124143	2.41187	4.28007	19.4281	2.44896	0.0019	0.00791327	yes
TNFRSF9	ENSG00000049249	con72	vir_par72	OK	1.17839	21.8364	4.21185	18.5308	7.90432	5e-05	0.000280515	yes
DMRT1	ENSG00000137090	con72	vir_par72	OK	0.173158	3.07564	4.15073	17.7621	3.7776	5e-05	0.000280515	yes
BCL6	ENSG00000113916	con72	vir_par72	OK	8.46357	148.893	4.13687	17.5923	5.26088	5e-05	0.000280515	yes
IRAK2	ENSG00000134070	con72	vir_par72	OK	0.969117	16.7457	4.11097	17.2793	9.09859	5e-05	0.000280515	yes
CDKN2B	ENSG00000147883	con72	vir_par72	OK	0.380472	6.54509	4.10455	17.2025	2.15424	0.0005	0.00237265	yes
ALOXE3	ENSG00000179148	con72	vir_par72	OK	1.14824	19.1315	4.05845	16.6615	8.16196	5e-05	0.000280515	yes
CSRNP1	ENSG00000144655	con72	vir_par72	OK	4.17903	69.2927	4.05147	16.5811	11.1111	5e-05	0.000280515	yes
SPON1	ENSG00000152268	con72	vir_par72	OK	0.0758104	1.23803	4.0295	16.3305	3.21704	5e-05	0.000280515	yes
C2orf82	ENSG00000182600	con72	vir_par72	OK	0.357531	5.6597	3.98458	15.8299	0.614658	5e-05	0.000280515	yes
SFN	ENSG00000175793	con72	vir_par72	OK	11.3156	177.658	3.97272	15.7003	10.7788	5e-05	0.000280515	yes
INSIG1	ENSG00000186480	con72	vir_par72	OK	94.7113	1468.06	3.95423	15.5004	11.4875	5e-05	0.000280515	yes
FAM46A	ENSG00000112773	con72	vir_par72	OK	9.02159	139.519	3.95093	15.4649	9.44772	5e-05	0.000280515	yes
RP11-513I15.6	ENSG00000225339	con72	vir_par72	OK	0.0684488	1.05126	3.94095	15.3583	0.254759	0.0025	0.0101054	yes
KLF6	ENSG00000067082	con72	vir_par72	OK	34.0195	521.671	3.93871	15.3345	10.4865	5e-05	0.000280515	yes
SPDYA	ENSG00000163806	con72	vir_par72	OK	0.107607	1.62574	3.91725	15.1081	0.334818	0.00025	0.00125904	yes
TRPV3	ENSG00000167723	con72	vir_par72	OK	1.65784	24.7476	3.89991	14.9276	7.71754	5e-05	0.000280515	yes
FBXO16	ENSG00000214050	con72	vir_par72	OK	14.4539	212.977	3.88117	14.7349	4.76818	5e-05	0.000280515	yes
FOSL1	ENSG00000175592	con72	vir_par72	OK	4.11653	60.3424	3.87367	14.6585	9.11033	5e-05	0.000280515	yes
DUSP10	ENSG00000143507	con72	vir_par72	OK	1.69477	24.8115	3.87185	14.6401	8.46035	5e-05	0.000280515	yes
PDE10A	ENSG00000112541	con72	vir_par72	OK	0.0894347	1.30301	3.86487	14.5694	2.24623	5e-05	0.000280515	yes
KPNA7	ENSG00000185467	con72	vir_par72	OK	0.166936	2.38256	3.83514	14.2722	4.26432	5e-05	0.000280515	yes
JUN	ENSG00000177606	con72	vir_par72	OK	3.78019	53.7987	3.83104	14.2317	10.8313	5e-05	0.000280515	yes
OASL	ENSG00000135114	con72	vir_par72	OK	0.965354	13.5414	3.81018	14.0274	7.53561	5e-05	0.000280515	yes
CTGF	ENSG00000118523	con72	vir_par72	OK	6.19593	85.6444	3.78897	13.8227	10.7181	5e-05	0.000280515	yes
ADM	ENSG00000148926	con72	vir_par72	OK	3.48915	48.1679	3.78713	13.8051	6.69687	5e-05	0.000280515	yes
AOC2	ENSG00000131480	con72	vir_par72	OK	0.632755	8.57565	3.76053	13.5529	7.25391	5e-05	0.000280515	yes
RELB	ENSG00000104856	con72	vir_par72	OK	3.10533	42.0038	3.7577	13.5263	6.51912	5e-05	0.000280515	yes
CFLAR-AS1	ENSG00000226312	con72	vir_par72	OK	0.203909	2.73951	3.74792	13.435	0.597875	5e-05	0.000280515	yes
MFSD2A	ENSG00000168389	con72	vir_par72	OK	1.62974	21.8898	3.74755	13.4315	6.33053	5e-05	0.000280515	yes
HSPB8	ENSG00000152137	con72	vir_par72	OK	0.140142	1.85884	3.72945	13.2641	1.53755	0.0021	0.00865243	yes
SOCS3	ENSG00000184557	con72	vir_par72	OK	0.388048	5.14209	3.72805	13.2512	4.87643	5e-05	0.000280515	yes
RAB30	ENSG00000137502	con72	vir_par72	OK	4.6899	60.4559	3.68825	12.8906	2.41723	5e-05	0.000280515	yes
PLEKHO1	ENSG00000023902	con72	vir_par72	OK	0.778546	10.002	3.68336	12.847	4.84913	5e-05	0.000280515	yes
PMEPA1	ENSG00000124225	con72	vir_par72	OK	1.10793	14.1485	3.6747	12.7701	7.082	5e-05	0.000280515	yes
CASS4	ENSG00000087589	con72	vir_par72	OK	0.0822256	1.04644	3.66976	12.7265	3.13465	5e-05	0.000280515	yes
FAM46B	ENSG00000158246	con72	vir_par72	OK	0.92939	11.7366	3.65859	12.6283	7.55884	5e-05	0.000280515	yes
RND1	ENSG00000172602	con72	vir_par72	OK	1.30624	16.4433	3.65401	12.5883	5.03142	5e-05	0.000280515	yes
IL10RA	ENSG00000110324	con72	vir_par72	OK	0.757553	9.39682	3.63275	12.4041	4.49685	5e-05	0.000280515	yes
SLC25A25	ENSG00000148339	con72	vir_par72	OK	6.06487	74.428	3.61729	12.2719	9.88811	5e-05	0.000280515	yes
ITPKC	ENSG00000086544	con72	vir_par72	OK	3.73436	45.2615	3.59935	12.1203	5.78949	5e-05	0.000280515	yes
DNAJC25,DNAJC25-GNG10	ENSG00000059769	con72	vir_par72	OK	3.80758	46.1426	3.59915	12.1186	7.59989	5e-05	0.000280515	yes
MATN1-AS1	ENSG00000186056	con72	vir_par72	OK	0.79521	9.58703	3.59168	12.056	3.82825	5e-05	0.000280515	yes
DUSP2	ENSG00000158050	con72	vir_par72	OK	1.07454	12.8352	3.57832	11.9449	6.38912	5e-05	0.000280515	yes
FSTL3	ENSG00000070404	con72	vir_par72	OK	13.2824	151.567	3.51237	11.4111	10.7301	5e-05	0.000280515	yes
CA3	ENSG00000164879	con72	vir_par72	OK	0.171217	1.95283	3.51167	11.4056	0.843379	0.00045	0.00215616	yes
NR4A3	ENSG00000119508	con72	vir_par72	OK	0.438754	4.97491	3.50318	11.3387	6.6861	5e-05	0.000280515	yes
MX2	ENSG00000183486	con72	vir_par72	OK	0.144143	1.6075	3.47925	11.1522	1.29158	5e-05	0.000280515	yes
SDCBP2	ENSG00000125775	con72	vir_par72	OK	2.12399	23.6763	3.4786	11.1471	3.31744	5e-05	0.000280515	yes
CREB5	ENSG00000146592	con72	vir_par72	OK	4.13843	45.0548	3.44452	10.8869	3.64598	5e-05	0.000280515	yes
ZBTB49	ENSG00000168826	con72	vir_par72	OK	1.58123	17.0821	3.43337	10.8031	4.26803	5e-05	0.000280515	yes
ALDH8A1	ENSG00000118514	con72	vir_par72	OK	0.166938	1.76746	3.4043	10.5876	1.62132	5e-05	0.000280515	yes
ZNF165	ENSG00000197279	con72	vir_par72	OK	7.49909	79.2931	3.40241	10.5737	9.83967	5e-05	0.000280515	yes
RELT	ENSG00000054967	con72	vir_par72	OK	1.4818	15.5739	3.39371	10.5101	7.12547	5e-05	0.000280515	yes
MIS12	ENSG00000167842	con72	vir_par72	OK	39.9008	418.577	3.391	10.4904	7.01337	5e-05	0.000280515	yes
NFKBIA	ENSG00000100906	con72	vir_par72	OK	10.5939	109.804	3.37363	10.3649	9.20037	5e-05	0.000280515	yes
ZSCAN12P1	ENSG00000219891	con72	vir_par72	OK	6.59152	67.6397	3.35919	10.2616	5.33708	5e-05	0.000280515	yes
E2F6	ENSG00000169016	con72	vir_par72	OK	7.38473	75.744	3.35851	10.2568	8.16264	5e-05	0.000280515	yes
POU2F2	ENSG00000028277	con72	vir_par72	OK	0.128216	1.30451	3.34687	10.1744	0.848354	5e-05	0.000280515	yes
PTGR1	ENSG00000106853	con72	vir_par72	OK	60.6282	614.328	3.34095	10.1327	9.22125	5e-05	0.000280515	yes
SGK1	ENSG00000118515	con72	vir_par72	OK	4.7511	48.1168	3.34021	10.1275	4.8025	5e-05	0.000280515	yes
AC141586.5	ENSG00000215154	con72	vir_par72	OK	0.750734	7.50706	3.32187	9.9996	4.30679	5e-05	0.000280515	yes
NFKBIE	ENSG00000146232	con72	vir_par72	OK	1.76707	17.5503	3.31207	9.9319	3.54077	5e-05	0.000280515	yes
MUC4	ENSG00000145113	con72	vir_par72	OK	0.659155	6.53459	3.30941	9.91361	2.62234	5e-05	0.000280515	yes
CLEC4A	ENSG00000111729	con72	vir_par72	OK	0.858058	8.49341	3.3072	9.89843	3.24102	5e-05	0.000280515	yes
ETS1	ENSG00000134954	con72	vir_par72	OK	4.69565	46.2855	3.30116	9.85708	8.87733	5e-05	0.000280515	yes
TRIB1	ENSG00000173334	con72	vir_par72	OK	9.40699	91.9041	3.28832	9.76974	8.63643	5e-05	0.000280515	yes
AMIGO3	ENSG00000176020	con72	vir_par72	OK	1.05557	10.2774	3.28338	9.73634	2.66013	5e-05	0.000280515	yes
MIR22HG	ENSG00000186594	con72	vir_par72	OK	8.49351	82.4528	3.27913	9.7077	5.1576	5e-05	0.000280515	yes
EGR3	ENSG00000179388	con72	vir_par72	OK	2.49986	24.2214	3.27636	9.68908	1.92126	0.0035	0.0136171	yes
AC099522.1	ENSG00000183900	con72	vir_par72	OK	0.416584	4.02676	3.27294	9.66614	5.29312	5e-05	0.000280515	yes
GUCA1B	ENSG00000112599	con72	vir_par72	OK	2.48373	23.7015	3.2544	9.54272	7.02034	5e-05	0.000280515	yes
DLX2	ENSG00000115844	con72	vir_par72	OK	0.224689	2.13659	3.24931	9.50911	4.53618	5e-05	0.000280515	yes
TP53INP2	ENSG00000078804	con72	vir_par72	OK	4.53869	43.0434	3.24545	9.4837	4.91829	5e-05	0.000280515	yes
ARRDC3	ENSG00000113369	con72	vir_par72	OK	14.3287	135.683	3.24326	9.46931	8.467	5e-05	0.000280515	yes
AC093616.4	ENSG00000234231	con72	vir_par72	OK	0.213481	2.0198	3.24203	9.46124	3.78056	5e-05	0.000280515	yes
DDR2	ENSG00000162733	con72	vir_par72	OK	0.293532	2.77426	3.24051	9.45128	2.10039	5e-05	0.000280515	yes
ASIC4	ENSG00000072182	con72	vir_par72	OK	0.144588	1.36195	3.23565	9.4195	1.03767	5e-05	0.000280515	yes
HMGCS1	ENSG00000112972	con72	vir_par72	OK	112.974	1063.27	3.23444	9.4116	9.1036	5e-05	0.000280515	yes
ZBTB43	ENSG00000169155	con72	vir_par72	OK	6.60895	61.4634	3.21724	9.30006	5.62899	5e-05	0.000280515	yes
MAFK	ENSG00000198517	con72	vir_par72	OK	3.06629	28.4319	3.21294	9.27238	5.42425	5e-05	0.000280515	yes
GLA	ENSG00000102393	con72	vir_par72	OK	12.4683	115.276	3.20875	9.24549	3.6227	5e-05	0.000280515	yes
CABYR	ENSG00000154040	con72	vir_par72	OK	4.46286	41.0169	3.20018	9.19073	2.50857	5e-05	0.000280515	yes
PIM3	ENSG00000198355	con72	vir_par72	OK	9.35617	85.9823	3.20005	9.18991	9.38607	5e-05	0.000280515	yes
SLC20A1	ENSG00000144136	con72	vir_par72	OK	29.8375	273.182	3.19466	9.15564	7.76505	5e-05	0.000280515	yes
NFKBIB	ENSG00000104825	con72	vir_par72	OK	5.27352	48.0042	3.18632	9.10286	6.37549	5e-05	0.000280515	yes
MANF	ENSG00000145050	con72	vir_par72	OK	49.5221	446.142	3.17136	9.00896	9.5881	5e-05	0.000280515	yes
ABL2	ENSG00000143322	con72	vir_par72	OK	4.35784	39.0812	3.16479	8.96802	4.18507	5e-05	0.000280515	yes
MAP2	ENSG00000078018	con72	vir_par72	OK	3.65022	32.5606	3.15707	8.92016	6.64694	5e-05	0.000280515	yes
HMOX1	ENSG00000100292	con72	vir_par72	OK	2.73882	24.259	3.1469	8.8575	6.96941	5e-05	0.000280515	yes
DNAJB5	ENSG00000137094	con72	vir_par72	OK	2.69661	23.8526	3.14493	8.84542	7.42587	5e-05	0.000280515	yes
NR4A2	ENSG00000153234	con72	vir_par72	OK	0.495493	4.38142	3.14446	8.84253	3.86969	5e-05	0.000280515	yes
CTRL	ENSG00000141086	con72	vir_par72	OK	0.634434	5.60319	3.14271	8.83182	1.3034	0.00015	0.000786087	yes
SNAI1	ENSG00000124216	con72	vir_par72	OK	1.27223	11.1652	3.13358	8.7761	5.80234	5e-05	0.000280515	yes
BDKRB1	ENSG00000100739	con72	vir_par72	OK	0.223858	1.95254	3.1247	8.72225	1.12421	0.00975	0.0333739	yes
TSPYL2	ENSG00000184205	con72	vir_par72	OK	7.83068	68.1038	3.12052	8.69701	8.47668	5e-05	0.000280515	yes
BIRC3	ENSG00000023445	con72	vir_par72	OK	5.32711	46.1528	3.11499	8.66374	4.86811	5e-05	0.000280515	yes
IER3	ENSG00000137331	con72	vir_par72	OK	38.3518	331.517	3.11171	8.64407	10.1663	5e-05	0.000280515	yes
PPIF	ENSG00000108179	con72	vir_par72	OK	19.3699	165.767	3.09727	8.55798	9.33311	5e-05	0.000280515	yes
YPEL4	ENSG00000166793	con72	vir_par72	OK	0.710914	6.06555	3.09289	8.53204	2.41737	5e-05	0.000280515	yes
TNFRSF12A	ENSG00000006327	con72	vir_par72	OK	51.6011	439.586	3.09067	8.51892	9.68219	5e-05	0.000280515	yes
FICD	ENSG00000198855	con72	vir_par72	OK	3.53608	30.0744	3.08831	8.50499	4.47725	5e-05	0.000280515	yes
PROX1	ENSG00000117707	con72	vir_par72	OK	0.555954	4.70861	3.08226	8.4694	1.93112	5e-05	0.000280515	yes
GCLC	ENSG00000001084	con72	vir_par72	OK	73.9274	625.25	3.08025	8.45761	8.74049	5e-05	0.000280515	yes
RASSF1	ENSG00000068028	con72	vir_par72	OK	5.24712	44.2095	3.07476	8.42549	7.81	5e-05	0.000280515	yes
GMPPB	ENSG00000173540	con72	vir_par72	OK	6.15823	51.7793	3.07179	8.40816	4.79356	5e-05	0.000280515	yes
IL6R	ENSG00000160712	con72	vir_par72	OK	2.13541	17.917	3.06875	8.39046	6.11877	5e-05	0.000280515	yes
RGS16	ENSG00000143333	con72	vir_par72	OK	5.45924	45.788	3.0682	8.38726	8.63068	5e-05	0.000280515	yes
EIF2AK3	ENSG00000172071	con72	vir_par72	OK	13.3479	111.834	3.06668	8.37843	6.6731	5e-05	0.000280515	yes
SLC9A5	ENSG00000135740	con72	vir_par72	OK	0.628277	5.26297	3.0664	8.3768	2.5253	5e-05	0.000280515	yes
BACH2	ENSG00000112182	con72	vir_par72	OK	0.604412	5.05494	3.06409	8.3634	2.75861	5e-05	0.000280515	yes
KRTAP3-1	ENSG00000212901	con72	vir_par72	OK	0.276607	2.30148	3.05665	8.32038	1.97604	0.0091	0.0314403	yes
DNAJB9	ENSG00000128590	con72	vir_par72	OK	38.351	318.982	3.05614	8.31744	6.73441	5e-05	0.000280515	yes
ATF3	ENSG00000162772	con72	vir_par72	OK	27.4872	227.464	3.0488	8.27523	9.99286	5e-05	0.000280515	yes
IL12A	ENSG00000168811	con72	vir_par72	OK	0.614343	5.07208	3.04546	8.2561	1.62793	0.0001	0.000538822	yes
MAP3K14	ENSG00000006062	con72	vir_par72	OK	1.85146	15.2011	3.03744	8.21033	4.52378	5e-05	0.000280515	yes
VTRNA2-1	ENSG00000270123	con72	vir_par72	OK	62.9304	516.424	3.03673	8.20629	5.01228	0.00255	0.0102846	yes
FLRT3	ENSG00000125848	con72	vir_par72	OK	0.638346	5.20718	3.02809	8.15729	3.5383	5e-05	0.000280515	yes
PEA15	ENSG00000162734	con72	vir_par72	OK	88.4258	718.591	3.02263	8.12648	7.22188	5e-05	0.000280515	yes
44258	ENSG00000173926	con72	vir_par72	OK	0.958996	7.78281	3.02069	8.11556	3.39671	5e-05	0.000280515	yes
RP11-24F11.2	ENSG00000223552	con72	vir_par72	OK	0.496005	3.97264	3.00167	8.00927	3.16323	0.00155	0.00659446	yes
FTL	ENSG00000087086	con72	vir_par72	OK	4780.98	38200.1	2.9982	7.99002	5.99228	5e-05	0.000280515	yes
VIMP	ENSG00000131871	con72	vir_par72	OK	34.7001	276.606	2.99482	7.97133	9.73752	5e-05	0.000280515	yes
MAFF	ENSG00000185022	con72	vir_par72	OK	11.816	93.9066	2.99049	7.94744	8.15014	5e-05	0.000280515	yes
DNAJB1	ENSG00000132002	con72	vir_par72	OK	49.036	382.242	2.96257	7.79511	7.33711	5e-05	0.000280515	yes
CTD-2547E10.2	ENSG00000180747	con72	vir_par72	OK	0.860215	6.67206	2.95536	7.75625	1.98626	0.0002	0.00102556	yes
SQSTM1	ENSG00000161011	con72	vir_par72	OK	186.31	1439.14	2.94942	7.72438	8.24642	5e-05	0.000280515	yes
CCNYL1	ENSG00000163249	con72	vir_par72	OK	6.55556	50.3583	2.94144	7.68178	8.127	5e-05	0.000280515	yes
SEC24D	ENSG00000150961	con72	vir_par72	OK	15.044	115.309	2.93824	7.66476	8.06557	5e-05	0.000280515	yes
LYG1	ENSG00000144214	con72	vir_par72	OK	0.906467	6.87665	2.92338	7.58621	0.57619	0.00715	0.0255087	yes
AC006262.6	ENSG00000268460	con72	vir_par72	OK	0.469012	3.53623	2.91452	7.53977	4.22509	5e-05	0.000280515	yes
AKAP17A	ENSG00000197976	con72	vir_par72	OK	2.84527	21.4394	2.91363	7.53512	7.73621	5e-05	0.000280515	yes
CLDN4	ENSG00000189143	con72	vir_par72	OK	113.498	854.552	2.9125	7.52922	9.10208	5e-05	0.000280515	yes
AC008132.12	ENSG00000234764	con72	vir_par72	OK	1.22144	9.16922	2.90821	7.50686	4.44144	5e-05	0.000280515	yes
DENND5A	ENSG00000184014	con72	vir_par72	OK	15.0861	112.447	2.89796	7.45372	6.37592	5e-05	0.000280515	yes
KCTD5	ENSG00000167977	con72	vir_par72	OK	6.31479	46.985	2.89539	7.44045	7.90501	5e-05	0.000280515	yes
RP11-1012A1.4	ENSG00000258466	con72	vir_par72	OK	0.306695	2.26702	2.88592	7.39177	0.184861	0.00915	0.031589	yes
PPP1R15A	ENSG00000087074	con72	vir_par72	OK	42.7003	314.356	2.88008	7.36191	9.66805	5e-05	0.000280515	yes
LIPG	ENSG00000101670	con72	vir_par72	OK	12.7825	93.6856	2.87365	7.32917	9.36875	5e-05	0.000280515	yes
LONRF3	ENSG00000175556	con72	vir_par72	OK	3.8369	27.8803	2.86123	7.26635	7.56516	5e-05	0.000280515	yes
ANKRD30BL	ENSG00000163046	con72	vir_par72	OK	0.257698	1.8711	2.86013	7.26081	2.69255	5e-05	0.000280515	yes
SERTAD1	ENSG00000197019	con72	vir_par72	OK	3.91957	28.4401	2.85916	7.25593	7.1109	5e-05	0.000280515	yes
MICB	ENSG00000204516	con72	vir_par72	OK	2.17868	15.8073	2.85906	7.25542	5.75797	5e-05	0.000280515	yes
PLIN2	ENSG00000147872	con72	vir_par72	OK	14.0532	101.492	2.8524	7.22201	6.8044	5e-05	0.000280515	yes
LURAP1L	ENSG00000153714	con72	vir_par72	OK	57.4326	411.397	2.84059	7.16313	9.69494	5e-05	0.000280515	yes
NDEL1	ENSG00000166579	con72	vir_par72	OK	22.2004	158.501	2.83583	7.13953	4.89166	5e-05	0.000280515	yes
GADD45A	ENSG00000116717	con72	vir_par72	OK	20.9658	149.622	2.83521	7.13647	9.06966	5e-05	0.000280515	yes
GPR3	ENSG00000181773	con72	vir_par72	OK	1.24693	8.89303	2.8343	7.13197	5.51988	5e-05	0.000280515	yes
TUFT1	ENSG00000143367	con72	vir_par72	OK	11.4978	81.9948	2.83418	7.13137	8.81548	5e-05	0.000280515	yes
MSANTD3	ENSG00000066697	con72	vir_par72	OK	6.02846	42.6214	2.82172	7.07005	6.27041	5e-05	0.000280515	yes
TTLL7	ENSG00000137941	con72	vir_par72	OK	1.68625	11.8849	2.81724	7.04813	3.59346	5e-05	0.000280515	yes
RIPK4	ENSG00000183421	con72	vir_par72	OK	2.37835	16.6579	2.80817	7.00396	7.16247	5e-05	0.000280515	yes
PRDM4	ENSG00000110851	con72	vir_par72	OK	11.6753	81.4394	2.80227	6.97537	7.41151	5e-05	0.000280515	yes
SAMD4A	ENSG00000020577	con72	vir_par72	OK	6.10484	42.2304	2.79026	6.91754	6.254	5e-05	0.000280515	yes
BHLHA15	ENSG00000180535	con72	vir_par72	OK	0.657631	4.53457	2.78562	6.89533	3.22433	5e-05	0.000280515	yes
NABP1	ENSG00000173559	con72	vir_par72	OK	12.7825	88.0451	2.78407	6.88793	7.08591	5e-05	0.000280515	yes
JMJD6	ENSG00000070495	con72	vir_par72	OK	6.40941	44.0348	2.78038	6.87033	7.05661	5e-05	0.000280515	yes
TM4SF1-AS1	ENSG00000240541	con72	vir_par72	OK	0.33155	2.27645	2.77948	6.86605	0.319004	0.0139	0.0452881	yes
AEN	ENSG00000181026	con72	vir_par72	OK	15.4023	105.469	2.7756	6.84761	8.99453	5e-05	0.000280515	yes
FOS	ENSG00000170345	con72	vir_par72	OK	11.6115	79.4136	2.77384	6.83926	7.09842	5e-05	0.000280515	yes
SNORD3B-1	ENSG00000265185	con72	vir_par72	OK	0.32269	2.20522	2.7727	6.83386	1.65141	0.00015	0.000786087	yes
IPPK	ENSG00000127080	con72	vir_par72	OK	3.59985	24.563	2.77048	6.82335	2.43424	5e-05	0.000280515	yes
XDH	ENSG00000158125	con72	vir_par72	OK	2.01449	13.74	2.7699	6.82061	6.89962	5e-05	0.000280515	yes
S100A2	ENSG00000196754	con72	vir_par72	OK	2.20135	15.0056	2.76904	6.81654	4.79033	5e-05	0.000280515	yes
RND3	ENSG00000115963	con72	vir_par72	OK	52.4291	356.516	2.76552	6.79993	8.41033	5e-05	0.000280515	yes
TMEM39A	ENSG00000176142	con72	vir_par72	OK	66.9746	453.356	2.75896	6.76908	5.4154	5e-05	0.000280515	yes
AGAP6	ENSG00000204149	con72	vir_par72	OK	0.721404	4.80133	2.73456	6.65556	5.23083	5e-05	0.000280515	yes
GADD45B	ENSG00000099860	con72	vir_par72	OK	27.6081	183.16	2.72994	6.63428	5.64949	5e-05	0.000280515	yes
TFE3	ENSG00000068323	con72	vir_par72	OK	11.0804	73.5088	2.7299	6.6341	6.73912	5e-05	0.000280515	yes
FTLP2	ENSG00000232368	con72	vir_par72	OK	10.2912	68.0518	2.72522	6.61261	5.9482	5e-05	0.000280515	yes
RASGRP3	ENSG00000152689	con72	vir_par72	OK	1.01881	6.73672	2.72516	6.61234	2.18712	5e-05	0.000280515	yes
AC004980.7	ENSG00000205485	con72	vir_par72	OK	1.11817	7.38477	2.72341	6.60432	1.83891	5e-05	0.000280515	yes
KCNJ14	ENSG00000182324	con72	vir_par72	OK	2.44205	16.115	2.72223	6.59892	2.76455	5e-05	0.000280515	yes
DUSP8	ENSG00000184545	con72	vir_par72	OK	2.0415	13.4453	2.71939	6.58594	2.77897	5e-05	0.000280515	yes
TBC1D30	ENSG00000111490	con72	vir_par72	OK	4.58957	30.1623	2.71632	6.57194	4.16277	5e-05	0.000280515	yes
LDLR	ENSG00000130164	con72	vir_par72	OK	37.7816	247.507	2.71171	6.55098	5.71709	5e-05	0.000280515	yes
SPHK1	ENSG00000176170	con72	vir_par72	OK	0.153589	1.00324	2.70753	6.53202	0.65457	5e-05	0.000280515	yes
FTLP3	ENSG00000226608	con72	vir_par72	OK	129.142	840.911	2.703	6.51155	6.79674	5e-05	0.000280515	yes
TUBB3	ENSG00000258947	con72	vir_par72	OK	1.90054	12.3522	2.70029	6.49933	1.80627	5e-05	0.000280515	yes
PVT1	ENSG00000249859	con72	vir_par72	OK	16.2537	105.618	2.70002	6.49811	4.83924	5e-05	0.000280515	yes
DNAJC6	ENSG00000116675	con72	vir_par72	OK	2.27483	14.7733	2.69916	6.49424	5.73825	5e-05	0.000280515	yes
ABCC2	ENSG00000023839	con72	vir_par72	OK	0.183587	1.1884	2.69448	6.4732	2.10989	5e-05	0.000280515	yes
CLIP4	ENSG00000115295	con72	vir_par72	OK	6.61951	42.811	2.69318	6.46737	3.46307	5e-05	0.000280515	yes
NPC1	ENSG00000141458	con72	vir_par72	OK	28.1879	182.069	2.69134	6.45913	6.02812	5e-05	0.000280515	yes
MMP1	ENSG00000196611	con72	vir_par72	OK	1.40646	9.00241	2.67824	6.40075	4.02661	5e-05	0.000280515	yes
EGR2	ENSG00000122877	con72	vir_par72	OK	1.58661	10.1368	2.67558	6.38896	5.88567	5e-05	0.000280515	yes
JUNB	ENSG00000171223	con72	vir_par72	OK	2.97778	18.9161	2.66731	6.35244	2.10549	0.00025	0.00125904	yes
HSPA1B	ENSG00000204388	con72	vir_par72	OK	6.80209	43.0596	2.66228	6.33033	7.92516	5e-05	0.000280515	yes
JMJD1C	ENSG00000171988	con72	vir_par72	OK	21.7548	137.334	2.65828	6.3128	3.99967	5e-05	0.000280515	yes
CDR2	ENSG00000140743	con72	vir_par72	OK	12.5166	78.756	2.65355	6.29214	6.08562	5e-05	0.000280515	yes
USP36	ENSG00000055483	con72	vir_par72	OK	24.3105	152.911	2.65305	6.28996	5.45023	5e-05	0.000280515	yes
YRDC	ENSG00000196449	con72	vir_par72	OK	13.2025	82.8617	2.6499	6.27624	7.51005	5e-05	0.000280515	yes
RNU6ATAC	ENSG00000221676	con72	vir_par72	OK	270.225	1691.87	2.64638	6.26094	3.71356	5e-05	0.000280515	yes
PHKG1	ENSG00000164776	con72	vir_par72	OK	0.309193	1.92831	2.64076	6.2366	1.47267	5e-05	0.000280515	yes
SEC31A	ENSG00000138674	con72	vir_par72	OK	32.88	204.884	2.63953	6.23129	2.79357	5e-05	0.000280515	yes
PIWIL2	ENSG00000197181	con72	vir_par72	OK	1.14876	7.14578	2.63701	6.22041	3.9992	5e-05	0.000280515	yes
BHLHE40	ENSG00000134107	con72	vir_par72	OK	18.5423	115.259	2.63598	6.21597	7.9647	5e-05	0.000280515	yes
TMC7	ENSG00000170537	con72	vir_par72	OK	1.2787	7.92184	2.63116	6.19524	3.09214	5e-05	0.000280515	yes
RP11-114H23.1	ENSG00000258077	con72	vir_par72	OK	0.22315	1.38231	2.63099	6.19451	2.08208	5e-05	0.000280515	yes
CXCL5	ENSG00000163735	con72	vir_par72	OK	31.4864	194.317	2.62561	6.17145	8.66602	5e-05	0.000280515	yes
FAM53C	ENSG00000120709	con72	vir_par72	OK	29.9692	184.665	2.62336	6.16183	4.95807	5e-05	0.000280515	yes
SMURF1	ENSG00000198742	con72	vir_par72	OK	8.09868	49.7577	2.61916	6.14392	5.35324	5e-05	0.000280515	yes
GPCPD1	ENSG00000125772	con72	vir_par72	OK	7.50276	45.9988	2.6161	6.1309	5.49707	5e-05	0.000280515	yes
HES4	ENSG00000188290	con72	vir_par72	OK	0.84444	5.14171	2.60618	6.08889	3.67262	5e-05	0.000280515	yes
C3orf52	ENSG00000114529	con72	vir_par72	OK	12.769	77.5857	2.60315	6.07612	7.71397	5e-05	0.000280515	yes
WHAMM	ENSG00000156232	con72	vir_par72	OK	3.14261	19.0807	2.60208	6.07161	5.34437	5e-05	0.000280515	yes
RP11-345J4.8	ENSG00000205534	con72	vir_par72	OK	0.858172	5.17913	2.59337	6.03507	4.23084	5e-05	0.000280515	yes
TUBA8	ENSG00000183785	con72	vir_par72	OK	0.244664	1.47487	2.59172	6.02817	0.597108	0.01185	0.039514	yes
RP11-430C7.5	ENSG00000240219	con72	vir_par72	OK	0.179169	1.0764	2.58683	6.00777	1.66725	0.00145	0.00621209	yes
REL	ENSG00000162924	con72	vir_par72	OK	4.5935	27.5962	2.5868	6.00765	7.32028	5e-05	0.000280515	yes
NRIP3	ENSG00000175352	con72	vir_par72	OK	0.635116	3.80654	2.58339	5.99346	3.80084	5e-05	0.000280515	yes
HIVEP2	ENSG00000010818	con72	vir_par72	OK	4.37262	26.198	2.58289	5.99139	1.0213	0.0004	0.00193713	yes
TM4SF19	ENSG00000145107	con72	vir_par72	OK	0.448941	2.68198	2.5787	5.97401	0.62109	0.00285	0.0113515	yes
RP3-449M8.6	ENSG00000259005	con72	vir_par72	OK	0.4387	2.61584	2.57597	5.96272	2.33467	0.0001	0.000538822	yes
ERRFI1	ENSG00000116285	con72	vir_par72	OK	298.583	1779.64	2.57538	5.96028	9.10724	5e-05	0.000280515	yes
EPHA2	ENSG00000142627	con72	vir_par72	OK	12.8582	76.4066	2.571	5.94221	7.46457	5e-05	0.000280515	yes
STK17A	ENSG00000164543	con72	vir_par72	OK	13.779	81.816	2.56992	5.93777	5.18534	5e-05	0.000280515	yes
RAET1L	ENSG00000155918	con72	vir_par72	OK	2.27517	13.4823	2.56702	5.92584	4.81903	5e-05	0.000280515	yes
DAB2	ENSG00000153071	con72	vir_par72	OK	7.05188	41.6263	2.56141	5.90284	3.72978	5e-05	0.000280515	yes
KIF16B	ENSG00000089177	con72	vir_par72	OK	4.65633	27.3932	2.55655	5.88299	7.94157	5e-05	0.000280515	yes
EHD4	ENSG00000103966	con72	vir_par72	OK	11.923	70.0467	2.55457	5.87492	8.36388	5e-05	0.000280515	yes
NEDD9	ENSG00000111859	con72	vir_par72	OK	5.75234	33.7533	2.55281	5.86776	6.70606	5e-05	0.000280515	yes
RGCC	ENSG00000102760	con72	vir_par72	OK	0.283706	1.658	2.54697	5.84406	1.82677	5e-05	0.000280515	yes
MCL1	ENSG00000143384	con72	vir_par72	OK	84.474	492.524	2.54361	5.83046	8.1366	5e-05	0.000280515	yes
TVP23C-CDRT4	ENSG00000259024	con72	vir_par72	OK	1.17646	6.84632	2.54088	5.81944	1.75813	0.00025	0.00125904	yes
SEMA7A	ENSG00000138623	con72	vir_par72	OK	1.57899	9.17835	2.53923	5.81279	4.24956	5e-05	0.000280515	yes
CCT6P3	ENSG00000234585	con72	vir_par72	OK	1.23545	7.17198	2.53733	5.80514	3.8827	5e-05	0.000280515	yes
SNHG15	ENSG00000232956	con72	vir_par72	OK	39.5106	229.327	2.53709	5.80417	1.12622	5e-05	0.000280515	yes
USP53	ENSG00000145390	con72	vir_par72	OK	20.2294	117.333	2.53608	5.80011	5.63731	5e-05	0.000280515	yes
CD83	ENSG00000112149	con72	vir_par72	OK	1.38125	8.01114	2.53603	5.79991	5.36979	5e-05	0.000280515	yes
IGF2BP2	ENSG00000073792	con72	vir_par72	OK	20.0756	116.211	2.53323	5.78866	1.00409	0.00065	0.00300853	yes
PHLDB2	ENSG00000144824	con72	vir_par72	OK	0.709271	4.09543	2.52961	5.77416	2.76767	5e-05	0.000280515	yes
PEAR1	ENSG00000187800	con72	vir_par72	OK	4.19071	24.1799	2.52854	5.76987	6.81426	5e-05	0.000280515	yes
NR4A1	ENSG00000123358	con72	vir_par72	OK	10.4183	60.0962	2.52816	5.76836	5.33478	5e-05	0.000280515	yes
TDG	ENSG00000139372	con72	vir_par72	OK	17.6829	101.799	2.5253	5.75693	6.602	5e-05	0.000280515	yes
RP11-443N24.1	ENSG00000255725	con72	vir_par72	OK	16.4956	94.8761	2.52396	5.75159	5.10469	5e-05	0.000280515	yes
HRH1	ENSG00000196639	con72	vir_par72	OK	9.44593	54.2907	2.52294	5.74752	7.42264	5e-05	0.000280515	yes
TENM3	ENSG00000218336	con72	vir_par72	OK	8.6364	49.5465	2.52028	5.73693	3.9846	5e-05	0.000280515	yes
PSME4	ENSG00000068878	con72	vir_par72	OK	18.1647	103.438	2.50956	5.69446	5.51917	5e-05	0.000280515	yes
PISD	ENSG00000241878	con72	vir_par72	OK	15.0328	85.0102	2.49952	5.65497	3.4635	5e-05	0.000280515	yes
VPS37B	ENSG00000139722	con72	vir_par72	OK	8.30565	46.7878	2.49397	5.63326	7.0408	5e-05	0.000280515	yes
EPSTI1	ENSG00000133106	con72	vir_par72	OK	0.287561	1.61938	2.49351	5.63146	1.60069	5e-05	0.000280515	yes
CEP85L	ENSG00000111860	con72	vir_par72	OK	2.12637	11.9641	2.49224	5.62651	5.2902	5e-05	0.000280515	yes
PRDM11	ENSG00000019485	con72	vir_par72	OK	1.56002	8.77722	2.4922	5.62635	4.81515	5e-05	0.000280515	yes
RP11-337C18.4	ENSG00000213226	con72	vir_par72	OK	0.652033	3.66632	2.49132	5.62292	3.27384	5e-05	0.000280515	yes
MCAM	ENSG00000076706	con72	vir_par72	OK	4.96155	27.8861	2.49068	5.62043	4.64485	5e-05	0.000280515	yes
RPS6KC1	ENSG00000136643	con72	vir_par72	OK	10.1151	56.8388	2.49037	5.61922	5.13944	5e-05	0.000280515	yes
MAFG	ENSG00000197063	con72	vir_par72	OK	11.661	65.503	2.48987	5.61727	7.45045	5e-05	0.000280515	yes
CPM	ENSG00000135678	con72	vir_par72	OK	1.35667	7.6196	2.48965	5.61642	0.379989	0.00125	0.00543393	yes
DIRAS2	ENSG00000165023	con72	vir_par72	OK	0.725895	4.07538	2.4891	5.61428	5.16763	5e-05	0.000280515	yes
ZFAND2A	ENSG00000178381	con72	vir_par72	OK	21.072	117.876	2.48387	5.59396	6.53928	5e-05	0.000280515	yes
RGS2	ENSG00000116741	con72	vir_par72	OK	2.19901	12.2602	2.47906	5.57534	4.60029	5e-05	0.000280515	yes
PLCXD2	ENSG00000240891	con72	vir_par72	OK	1.0686	5.9523	2.47772	5.57016	1.7192	5e-05	0.000280515	yes
USPL1	ENSG00000132952	con72	vir_par72	OK	24.2134	134.864	2.47763	5.56982	6.83506	5e-05	0.000280515	yes
SERPINE1	ENSG00000106366	con72	vir_par72	OK	2.033	11.3076	2.47561	5.56202	5.91889	5e-05	0.000280515	yes
TUBB2A	ENSG00000137267	con72	vir_par72	OK	2.15577	11.9792	2.47425	5.55678	5.15419	5e-05	0.000280515	yes
RP11-61N20.3	ENSG00000226268	con72	vir_par72	OK	10.9848	60.9595	2.47234	5.54943	6.17967	5e-05	0.000280515	yes
PGM3	ENSG00000013375	con72	vir_par72	OK	106.853	592.558	2.47133	5.54555	4.61884	5e-05	0.000280515	yes
TMED7-TICAM2	ENSG00000251201	con72	vir_par72	OK	3.32428	18.4037	2.46888	5.53614	1.82212	0.00065	0.00300853	yes
CSF1	ENSG00000184371	con72	vir_par72	OK	3.0411	16.775	2.46365	5.51611	3.13346	5e-05	0.000280515	yes
TXNL4B	ENSG00000140830	con72	vir_par72	OK	4.14566	22.7269	2.45473	5.48211	3.24735	5e-05	0.000280515	yes
FRMD5	ENSG00000171877	con72	vir_par72	OK	6.23222	34.1356	2.45346	5.47728	6.11485	5e-05	0.000280515	yes
AC005532.5	ENSG00000230825	con72	vir_par72	OK	0.231569	1.26811	2.45317	5.47618	1.61141	0.0114	0.0382237	yes
TLR6	ENSG00000174130	con72	vir_par72	OK	0.233384	1.27664	2.45158	5.47015	1.62351	5e-05	0.000280515	yes
CLCF1	ENSG00000175505	con72	vir_par72	OK	1.19495	6.53097	2.45035	5.46549	2.368	5e-05	0.000280515	yes
AGPAT9	ENSG00000138678	con72	vir_par72	OK	11.9083	64.7776	2.44353	5.43971	7.30112	5e-05	0.000280515	yes
PLK2	ENSG00000145632	con72	vir_par72	OK	24.6804	134.036	2.44118	5.43086	5.20662	5e-05	0.000280515	yes
FJX1	ENSG00000179431	con72	vir_par72	OK	0.563618	3.03785	2.43026	5.38991	3.72267	5e-05	0.000280515	yes
NKIRAS1	ENSG00000197885	con72	vir_par72	OK	8.34804	44.9441	2.42862	5.38378	1.01359	5e-05	0.000280515	yes
LHX5	ENSG00000089116	con72	vir_par72	OK	0.187611	1.00926	2.42748	5.37953	2.75244	5e-05	0.000280515	yes
CNTD2	ENSG00000105219	con72	vir_par72	OK	1.64927	8.86789	2.42676	5.37685	3.56557	5e-05	0.000280515	yes
TASP1	ENSG00000089123	con72	vir_par72	OK	13.8772	74.2548	2.41977	5.35086	5.64565	5e-05	0.000280515	yes
RASGEF1B	ENSG00000138670	con72	vir_par72	OK	1.00558	5.37876	2.41925	5.34893	3.74442	5e-05	0.000280515	yes
LIF	ENSG00000128342	con72	vir_par72	OK	3.81875	20.4107	2.41815	5.34485	6.6739	5e-05	0.000280515	yes
EGR1	ENSG00000120738	con72	vir_par72	OK	86.3804	461.578	2.4178	5.34356	8.22758	5e-05	0.000280515	yes
UAP1	ENSG00000117143	con72	vir_par72	OK	24.3401	129.864	2.41559	5.33538	7.86032	5e-05	0.000280515	yes
LYST	ENSG00000143669	con72	vir_par72	OK	4.45965	23.6798	2.40865	5.30977	2.32626	5e-05	0.000280515	yes
STK40	ENSG00000196182	con72	vir_par72	OK	21.2674	112.893	2.40824	5.30826	5.30386	5e-05	0.000280515	yes
ANKHD1-EIF4EBP3	ENSG00000254996	con72	vir_par72	OK	6.48806	34.3932	2.40626	5.30098	1.82378	0.0001	0.000538822	yes
SBSN	ENSG00000189001	con72	vir_par72	OK	0.305463	1.61903	2.40606	5.30025	2.60856	5e-05	0.000280515	yes
SLC31A2	ENSG00000136867	con72	vir_par72	OK	3.14748	16.6379	2.40221	5.28612	2.96993	5e-05	0.000280515	yes
RP11-49C24.1	ENSG00000260023	con72	vir_par72	OK	1.15891	6.11968	2.40069	5.28056	2.48894	5e-05	0.000280515	yes
TSC22D2	ENSG00000196428	con72	vir_par72	OK	17.438	91.922	2.39818	5.27138	6.38938	5e-05	0.000280515	yes
INTS6	ENSG00000102786	con72	vir_par72	OK	22.1474	116.74	2.39809	5.27105	4.8321	5e-05	0.000280515	yes
RP11-443P15.2	ENSG00000171658	con72	vir_par72	OK	4.12276	21.7128	2.39686	5.26656	3.84192	5e-05	0.000280515	yes
GOLGA4	ENSG00000144674	con72	vir_par72	OK	17.956	94.5149	2.39607	5.26367	4.91529	5e-05	0.000280515	yes
PIP5K1A	ENSG00000143398	con72	vir_par72	OK	165.996	873.722	2.39602	5.26349	5.58482	5e-05	0.000280515	yes
MURC	ENSG00000170681	con72	vir_par72	OK	0.246482	1.29723	2.39588	5.26298	3.51675	5e-05	0.000280515	yes
ADRB1	ENSG00000043591	con72	vir_par72	OK	1.46168	7.66862	2.39134	5.24644	5.1814	5e-05	0.000280515	yes
NXF1	ENSG00000162231	con72	vir_par72	OK	41.2033	215.884	2.38942	5.23947	4.21203	5e-05	0.000280515	yes
GK	ENSG00000198814	con72	vir_par72	OK	1.24787	6.53597	2.38893	5.23769	2.9209	5e-05	0.000280515	yes
ZC3H12C	ENSG00000149289	con72	vir_par72	OK	4.20247	21.9668	2.38602	5.22713	7.43751	5e-05	0.000280515	yes
NKAIN1	ENSG00000084628	con72	vir_par72	OK	0.266096	1.39019	2.38526	5.22438	1.71787	5e-05	0.000280515	yes
THEMIS2	ENSG00000130775	con72	vir_par72	OK	2.51852	13.1516	2.38459	5.22195	4.20927	5e-05	0.000280515	yes
TICAM1	ENSG00000127666	con72	vir_par72	OK	1.88684	9.84043	2.38275	5.2153	5.10191	5e-05	0.000280515	yes
PREB	ENSG00000138073	con72	vir_par72	OK	27.4285	142.998	2.38225	5.21349	5.49763	5e-05	0.000280515	yes
KDM6B	ENSG00000132510	con72	vir_par72	OK	11.7073	61.0311	2.38213	5.21306	1.6403	0.0001	0.000538822	yes
TIPARP	ENSG00000163659	con72	vir_par72	OK	21.34	110.886	2.37744	5.19614	7.55681	5e-05	0.000280515	yes
LAMA1	ENSG00000101680	con72	vir_par72	OK	0.661375	3.43423	2.37645	5.19257	2.08698	5e-05	0.000280515	yes
CBR3-AS1	ENSG00000236830	con72	vir_par72	OK	5.88231	30.5162	2.37512	5.18779	2.85856	5e-05	0.000280515	yes
MED9	ENSG00000141026	con72	vir_par72	OK	7.45972	38.521	2.36845	5.16386	6.40585	5e-05	0.000280515	yes
WTIP	ENSG00000142279	con72	vir_par72	OK	0.288525	1.48915	2.36773	5.16128	1.9342	5e-05	0.000280515	yes
CADPS2	ENSG00000081803	con72	vir_par72	OK	5.44453	28.0646	2.36587	5.15463	5.58992	5e-05	0.000280515	yes
ZNF778	ENSG00000170100	con72	vir_par72	OK	1.84919	9.51382	2.36313	5.14485	4.43912	5e-05	0.000280515	yes
MVK	ENSG00000110921	con72	vir_par72	OK	8.11934	41.7583	2.36263	5.14307	4.05162	5e-05	0.000280515	yes
ZFP36	ENSG00000128016	con72	vir_par72	OK	22.4691	115.456	2.36133	5.13844	7.07977	5e-05	0.000280515	yes
ZNF292	ENSG00000188994	con72	vir_par72	OK	8.21475	42.1249	2.35838	5.12794	4.1761	5e-05	0.000280515	yes
LARP1B	ENSG00000138709	con72	vir_par72	OK	23.6322	120.3	2.34781	5.09051	7.43558	5e-05	0.000280515	yes
IL32	ENSG00000008517	con72	vir_par72	OK	13.4604	68.4213	2.34573	5.08318	5.94864	5e-05	0.000280515	yes
RHPN2	ENSG00000131941	con72	vir_par72	OK	15.1368	76.8893	2.34473	5.07965	7.36495	5e-05	0.000280515	yes
BRD2	ENSG00000204256	con72	vir_par72	OK	124.155	630.3	2.34389	5.0767	5.56315	5e-05	0.000280515	yes
GCNT2	ENSG00000111846	con72	vir_par72	OK	2.29554	11.6537	2.34388	5.07666	2.5348	5e-05	0.000280515	yes
SDF2L1	ENSG00000128228	con72	vir_par72	OK	3.16167	16.0468	2.34353	5.07543	4.55117	5e-05	0.000280515	yes
MAD2L1BP	ENSG00000124688	con72	vir_par72	OK	52.5413	266.527	2.34276	5.07272	6.48301	5e-05	0.000280515	yes
LUCAT1,RP11-213H15.4	ENSG00000248323	con72	vir_par72	OK	2.14982	10.8965	2.34158	5.06857	2.87654	5e-05	0.000280515	yes
PLK3	ENSG00000173846	con72	vir_par72	OK	6.46954	32.7907	2.34155	5.06847	4.64075	5e-05	0.000280515	yes
ZMYM5	ENSG00000132950	con72	vir_par72	OK	13.7814	69.6791	2.338	5.05601	6.27238	5e-05	0.000280515	yes
RP11-752L20.1	ENSG00000249004	con72	vir_par72	OK	0.493731	2.49573	2.33766	5.05482	2.16955	0.0002	0.00102556	yes
LRRC8E	ENSG00000171017	con72	vir_par72	OK	14.9452	75.493	2.33666	5.05132	3.50587	5e-05	0.000280515	yes
LCAT	ENSG00000213398	con72	vir_par72	OK	4.04981	20.4383	2.33535	5.04673	2.11894	5e-05	0.000280515	yes
GPNMB	ENSG00000136235	con72	vir_par72	OK	0.848665	4.27977	2.33427	5.04296	2.48219	5e-05	0.000280515	yes
AC009404.2	ENSG00000236255	con72	vir_par72	OK	1.27178	6.40797	2.33302	5.03859	3.5104	5e-05	0.000280515	yes
YTHDC1	ENSG00000083896	con72	vir_par72	OK	37.3853	188.105	2.33099	5.03151	5.09235	5e-05	0.000280515	yes
HSD17B7P2	ENSG00000099251	con72	vir_par72	OK	3.20738	16.0888	2.32659	5.01618	4.81469	5e-05	0.000280515	yes
RHOB	ENSG00000143878	con72	vir_par72	OK	38.5563	193.353	2.3262	5.01483	8.07113	5e-05	0.000280515	yes
AC008738.1	ENSG00000230259	con72	vir_par72	OK	7.20765	36.1258	2.32543	5.01215	6.50873	5e-05	0.000280515	yes
AQP3	ENSG00000165272	con72	vir_par72	OK	21.5939	108.174	2.32466	5.00948	7.2627	5e-05	0.000280515	yes
VCPKMT	ENSG00000100483	con72	vir_par72	OK	5.55375	27.7617	2.32156	4.99872	5.59785	5e-05	0.000280515	yes
CAV1	ENSG00000105974	con72	vir_par72	OK	0.932045	4.64501	2.31721	4.98368	3.61757	5e-05	0.000280515	yes
CCND2	ENSG00000118971	con72	vir_par72	OK	0.441578	2.19869	2.31591	4.97919	2.77496	5e-05	0.000280515	yes
UTP15	ENSG00000164338	con72	vir_par72	OK	19.7866	98.5057	2.31568	4.97839	5.11124	5e-05	0.000280515	yes
TET2	ENSG00000168769	con72	vir_par72	OK	6.11391	30.2068	2.30471	4.94068	2.48706	5e-05	0.000280515	yes
PXDC1	ENSG00000168994	con72	vir_par72	OK	11.4395	56.4129	2.302	4.93141	6.05619	5e-05	0.000280515	yes
RPL13AP20	ENSG00000234498	con72	vir_par72	OK	0.452923	2.23157	2.30073	4.92707	2.14766	5e-05	0.000280515	yes
OSGIN2	ENSG00000164823	con72	vir_par72	OK	18.9617	93.3842	2.30009	4.92488	5.98232	5e-05	0.000280515	yes
PIM2	ENSG00000102096	con72	vir_par72	OK	9.12462	44.8383	2.29689	4.91397	6.34279	5e-05	0.000280515	yes
ADARB1	ENSG00000197381	con72	vir_par72	OK	9.43172	46.2261	2.29312	4.90115	3.2034	5e-05	0.000280515	yes
NRARP	ENSG00000198435	con72	vir_par72	OK	12.8788	63.0274	2.29098	4.89388	7.21167	5e-05	0.000280515	yes
ATP10D	ENSG00000145246	con72	vir_par72	OK	1.24007	6.04954	2.2864	4.87837	2.25957	5e-05	0.000280515	yes
PFKFB3	ENSG00000170525	con72	vir_par72	OK	9.55234	46.5481	2.2848	4.87297	6.40662	5e-05	0.000280515	yes
ABHD4	ENSG00000100439	con72	vir_par72	OK	23.4334	113.735	2.27904	4.85355	3.31556	5e-05	0.000280515	yes
GABARAPL1	ENSG00000139112	con72	vir_par72	OK	26.6782	129.476	2.27895	4.85325	6.33206	5e-05	0.000280515	yes
CTA-941F9.9	ENSG00000238120	con72	vir_par72	OK	1.56293	7.58157	2.27824	4.85086	2.99383	5e-05	0.000280515	yes
EPC1	ENSG00000120616	con72	vir_par72	OK	14.1214	68.2966	2.27394	4.83642	5.6458	5e-05	0.000280515	yes
NKX3-1	ENSG00000167034	con72	vir_par72	OK	5.78067	27.9341	2.27272	4.83233	6.54128	5e-05	0.000280515	yes
RP11-294O2.2	ENSG00000248771	con72	vir_par72	OK	0.374961	1.80567	2.26773	4.81565	3.06075	5e-05	0.000280515	yes
NFXL1	ENSG00000170448	con72	vir_par72	OK	18.5182	89.0821	2.26619	4.81051	5.05313	5e-05	0.000280515	yes
LMCD1	ENSG00000071282	con72	vir_par72	OK	6.40995	30.7312	2.26132	4.7943	4.2237	5e-05	0.000280515	yes
CDC37L1	ENSG00000106993	con72	vir_par72	OK	10.8092	51.7632	2.25967	4.78882	6.9399	5e-05	0.000280515	yes
ZNF267	ENSG00000185947	con72	vir_par72	OK	9.92898	47.4842	2.25773	4.78238	5.14892	5e-05	0.000280515	yes
ABCG2	ENSG00000118777	con72	vir_par72	OK	2.19817	10.4982	2.25577	4.77589	2.24386	5e-05	0.000280515	yes
CRELD2	ENSG00000184164	con72	vir_par72	OK	8.14451	38.8799	2.25512	4.77374	4.95408	5e-05	0.000280515	yes
HERPUD1	ENSG00000051108	con72	vir_par72	OK	268.428	1280.64	2.25426	4.7709	5.47745	5e-05	0.000280515	yes
PSG4	ENSG00000243137	con72	vir_par72	OK	0.791114	3.77233	2.2535	4.76838	2.5228	5e-05	0.000280515	yes
ZSWIM4	ENSG00000132003	con72	vir_par72	OK	1.00251	4.77742	2.25262	4.76547	4.45325	5e-05	0.000280515	yes
SIAH2	ENSG00000181788	con72	vir_par72	OK	17.789	84.746	2.25216	4.76396	7.11129	5e-05	0.000280515	yes
STAM	ENSG00000136738	con72	vir_par72	OK	27.3166	130.069	2.25143	4.76155	7.0174	5e-05	0.000280515	yes
PDIA5	ENSG00000065485	con72	vir_par72	OK	8.88664	42.293	2.25071	4.75917	3.02829	5e-05	0.000280515	yes
ZNF143	ENSG00000166478	con72	vir_par72	OK	18.2765	86.9526	2.25024	4.75762	4.48048	5e-05	0.000280515	yes
ZNF513	ENSG00000163795	con72	vir_par72	OK	2.04614	9.73265	2.24993	4.7566	3.85527	5e-05	0.000280515	yes
CHD2	ENSG00000173575	con72	vir_par72	OK	50.4853	239.274	2.24472	4.73945	2.16631	5e-05	0.000280515	yes
KIAA1432	ENSG00000107036	con72	vir_par72	OK	9.17065	43.4555	2.24444	4.73853	5.86284	5e-05	0.000280515	yes
BMS1P4	ENSG00000242338	con72	vir_par72	OK	0.414768	1.96285	2.24258	4.73243	1.49136	0.00325	0.0127459	yes
C2orf54	ENSG00000172478	con72	vir_par72	OK	1.62842	7.69649	2.24073	4.72636	3.16962	5e-05	0.000280515	yes
FAM83G	ENSG00000188522	con72	vir_par72	OK	7.19989	34.0085	2.23985	4.72348	6.25842	5e-05	0.000280515	yes
TOX4	ENSG00000092203	con72	vir_par72	OK	45.2204	212.748	2.2341	4.70469	3.89164	5e-05	0.000280515	yes
MED26	ENSG00000105085	con72	vir_par72	OK	1.68668	7.92754	2.23269	4.7001	1.26719	0.0097	0.033221	yes
RAB9A	ENSG00000123595	con72	vir_par72	OK	12.9801	60.9478	2.23127	4.69547	5.32525	5e-05	0.000280515	yes
CDKN2AIP	ENSG00000168564	con72	vir_par72	OK	15.1259	70.8401	2.22754	4.68335	6.9283	5e-05	0.000280515	yes
LARP1BP1	ENSG00000231442	con72	vir_par72	OK	1.6285	7.625	2.2272	4.68224	4.43042	5e-05	0.000280515	yes
C1orf162	ENSG00000143110	con72	vir_par72	OK	0.442319	2.06965	2.22623	4.6791	2.46299	5e-05	0.000280515	yes
HPS5	ENSG00000110756	con72	vir_par72	OK	13.2507	61.9716	2.22553	4.67683	4.24196	5e-05	0.000280515	yes
GAS2L3	ENSG00000139354	con72	vir_par72	OK	35.345	165.029	2.22314	4.66909	5.58471	5e-05	0.000280515	yes
DEDD2	ENSG00000160570	con72	vir_par72	OK	8.44889	39.4242	2.22225	4.66621	4.93738	5e-05	0.000280515	yes
PTPN21	ENSG00000070778	con72	vir_par72	OK	4.00424	18.6624	2.22054	4.66068	3.87238	5e-05	0.000280515	yes
RP11-314A15.2	ENSG00000230039	con72	vir_par72	OK	1.30683	6.0639	2.21417	4.64015	3.83023	5e-05	0.000280515	yes
MTF1	ENSG00000188786	con72	vir_par72	OK	7.70719	35.736	2.2131	4.63671	6.67125	5e-05	0.000280515	yes
RP1-232L22		con72	vir_par72	OK	3.95865	18.3371	2.21169	4.63218	5.07885	5e-05	0.000280515	yes
MUL1	ENSG00000090432	con72	vir_par72	OK	7.37655	34.0651	2.20728	4.61804	6.30799	5e-05	0.000280515	yes
JUND	ENSG00000130522	con72	vir_par72	OK	29.4229	135.609	2.20444	4.60896	7.56132	5e-05	0.000280515	yes
AC005062.2	ENSG00000243004	con72	vir_par72	OK	1.1677	5.36999	2.20125	4.59878	0.520268	0.0021	0.00865243	yes
DLL4	ENSG00000128917	con72	vir_par72	OK	0.270799	1.24498	2.20083	4.59744	2.79764	5e-05	0.000280515	yes
IER2	ENSG00000160888	con72	vir_par72	OK	23.1487	106.284	2.19892	4.59136	7.08849	5e-05	0.000280515	yes
ZIC5	ENSG00000139800	con72	vir_par72	OK	0.562141	2.57989	2.1983	4.58938	4.22325	5e-05	0.000280515	yes
RIMKLB	ENSG00000166532	con72	vir_par72	OK	2.05385	9.41854	2.19717	4.58579	2.64036	5e-05	0.000280515	yes
ABTB2	ENSG00000166016	con72	vir_par72	OK	2.50356	11.4664	2.19536	4.58004	5.3128	5e-05	0.000280515	yes
SLC35B1	ENSG00000121073	con72	vir_par72	OK	31.3949	143.66	2.19406	4.57591	3.85145	5e-05	0.000280515	yes
TMED9	ENSG00000184840	con72	vir_par72	OK	56.7863	259.147	2.19015	4.56353	7.50585	5e-05	0.000280515	yes
PRKCE	ENSG00000171132	con72	vir_par72	OK	1.79332	8.17005	2.18771	4.55582	3.08039	5e-05	0.000280515	yes
GPR89A	ENSG00000117262	con72	vir_par72	OK	9.62906	43.8516	2.18716	4.55408	3.90678	5e-05	0.000280515	yes
CCDC9	ENSG00000105321	con72	vir_par72	OK	12.5733	57.056	2.18202	4.53788	2.65775	5e-05	0.000280515	yes
KIAA0226	ENSG00000145016	con72	vir_par72	OK	6.41601	29.0822	2.18039	4.53276	2.9047	5e-05	0.000280515	yes
NFKB2	ENSG00000077150	con72	vir_par72	OK	18.3261	82.512	2.1707	4.50242	4.7027	5e-05	0.000280515	yes
DNHD1	ENSG00000179532	con72	vir_par72	OK	3.89119	17.4454	2.16456	4.4833	2.36705	5e-05	0.000280515	yes
PPAPDC1B	ENSG00000147535	con72	vir_par72	OK	20.8524	93.4019	2.16324	4.4792	2.3271	5e-05	0.000280515	yes
UPP1	ENSG00000183696	con72	vir_par72	OK	6.48613	29.0449	2.16286	4.47802	4.85808	5e-05	0.000280515	yes
RAPGEF2	ENSG00000109756	con72	vir_par72	OK	23.483	105.062	2.16155	4.47395	3.76285	5e-05	0.000280515	yes
KLHL21	ENSG00000162413	con72	vir_par72	OK	5.28593	23.6103	2.15918	4.46661	3.14797	5e-05	0.000280515	yes
PIPSL	ENSG00000180764	con72	vir_par72	OK	9.14816	40.8612	2.15918	4.46661	5.95689	5e-05	0.000280515	yes
ELF3	ENSG00000163435	con72	vir_par72	OK	51.9838	232.115	2.1587	4.46512	4.8754	5e-05	0.000280515	yes
TNFSF9	ENSG00000125657	con72	vir_par72	OK	4.3149	19.2618	2.15834	4.46401	4.93842	5e-05	0.000280515	yes
RP11-213H15.4	ENSG00000271762	con72	vir_par72	OK	1.90413	8.47237	2.15363	4.44946	1.77671	0.0001	0.000538822	yes
TRA2B	ENSG00000136527	con72	vir_par72	OK	112.336	498.909	2.15096	4.44123	6.0306	5e-05	0.000280515	yes
CYP27B1	ENSG00000111012	con72	vir_par72	OK	1.20352	5.33867	2.14922	4.43588	1.3497	0.0001	0.000538822	yes
ZNF57	ENSG00000171970	con72	vir_par72	OK	8.83129	39.1223	2.1473	4.42998	6.14298	5e-05	0.000280515	yes
HMGXB3	ENSG00000113716	con72	vir_par72	OK	12.4346	54.835	2.14074	4.40988	3.79192	5e-05	0.000280515	yes
HKDC1	ENSG00000156510	con72	vir_par72	OK	0.41463	1.82678	2.13941	4.40582	2.26016	5e-05	0.000280515	yes
C1orf109	ENSG00000116922	con72	vir_par72	OK	22.4234	98.4876	2.13494	4.39219	5.87588	5e-05	0.000280515	yes
COG3	ENSG00000136152	con72	vir_par72	OK	24.8928	109.286	2.13431	4.39027	6.25683	5e-05	0.000280515	yes
NLRC5	ENSG00000140853	con72	vir_par72	OK	7.64461	33.5018	2.13172	4.3824	2.82363	5e-05	0.000280515	yes
ACBD3	ENSG00000182827	con72	vir_par72	OK	22.8931	100.237	2.13044	4.37851	4.82201	5e-05	0.000280515	yes
SLC36A4	ENSG00000180773	con72	vir_par72	OK	3.85551	16.8806	2.13037	4.3783	3.81343	5e-05	0.000280515	yes
KLHL29	ENSG00000119771	con72	vir_par72	OK	0.929783	4.06917	2.12977	4.37648	4.66469	5e-05	0.000280515	yes
ADORA2B	ENSG00000170425	con72	vir_par72	OK	4.44583	19.3959	2.12523	4.36273	5.07413	5e-05	0.000280515	yes
ZNF543	ENSG00000178229	con72	vir_par72	OK	3.28374	14.3112	2.12374	4.35822	5.76454	5e-05	0.000280515	yes
INTS6P1	ENSG00000250492	con72	vir_par72	OK	3.55716	15.4864	2.12221	4.3536	5.32316	5e-05	0.000280515	yes
NECAP1P1	ENSG00000178503	con72	vir_par72	OK	0.539286	2.34612	2.12116	4.35044	2.5648	5e-05	0.000280515	yes
MSH6	ENSG00000116062	con72	vir_par72	OK	3.36599	14.5711	2.11401	4.32893	2.44776	5e-05	0.000280515	yes
ATG9B	ENSG00000181652	con72	vir_par72	OK	0.652471	2.8244	2.11396	4.32878	1.58637	5e-05	0.000280515	yes
PLAUR	ENSG00000011422	con72	vir_par72	OK	5.97728	25.8734	2.11391	4.32863	4.63618	5e-05	0.000280515	yes
SNIP1	ENSG00000163877	con72	vir_par72	OK	9.24407	39.9638	2.11209	4.32317	6.57155	5e-05	0.000280515	yes
TINAGL1	ENSG00000142910	con72	vir_par72	OK	22.9848	99.1251	2.10857	4.31264	5.25758	5e-05	0.000280515	yes
LYSMD3	ENSG00000176018	con72	vir_par72	OK	26.2772	113.208	2.10709	4.30821	6.48329	5e-05	0.000280515	yes
TIMM23B	ENSG00000204152	con72	vir_par72	OK	0.88722	3.81486	2.10427	4.2998	2.40651	5e-05	0.000280515	yes
ICAM1	ENSG00000090339	con72	vir_par72	OK	15.2584	65.6012	2.10412	4.29935	5.47307	5e-05	0.000280515	yes
DCUN1D3	ENSG00000188215	con72	vir_par72	OK	11.3496	48.7892	2.10392	4.29876	2.7266	5e-05	0.000280515	yes
ZNF823	ENSG00000197933	con72	vir_par72	OK	9.95802	42.7867	2.10323	4.2967	5.20573	5e-05	0.000280515	yes
USP12PY	ENSG00000232927	con72	vir_par72	OK	0.874809	3.7556	2.102	4.29304	3.13608	5e-05	0.000280515	yes
CDK2AP2	ENSG00000167797	con72	vir_par72	OK	13.5922	58.3304	2.10147	4.29146	4.89657	5e-05	0.000280515	yes
TXNDC11	ENSG00000153066	con72	vir_par72	OK	17.9666	77.0487	2.10045	4.28843	2.68757	5e-05	0.000280515	yes
ZEB1	ENSG00000148516	con72	vir_par72	OK	1.56048	6.68497	2.09893	4.28392	0.738063	0.0029	0.0115239	yes
HSP90B3P	ENSG00000203914	con72	vir_par72	OK	17.3832	74.4401	2.09838	4.28228	6.36898	5e-05	0.000280515	yes
PKD1L2	ENSG00000166473	con72	vir_par72	OK	0.435967	1.86675	2.09824	4.28187	1.86112	5e-05	0.000280515	yes
HSP90B1	ENSG00000166598	con72	vir_par72	OK	373.574	1599	2.09771	4.28029	6.61649	5e-05	0.000280515	yes
DNAJC3	ENSG00000102580	con72	vir_par72	OK	49.5355	211.737	2.09574	4.27445	7.07187	5e-05	0.000280515	yes
HEG1	ENSG00000173706	con72	vir_par72	OK	1.45735	6.22869	2.09558	4.27398	3.13782	5e-05	0.000280515	yes
SH3RF1	ENSG00000154447	con72	vir_par72	OK	13.1224	56.0496	2.09467	4.27128	6.95625	5e-05	0.000280515	yes
C3orf35	ENSG00000198590	con72	vir_par72	OK	0.373099	1.59106	2.09236	4.26445	2.59686	5e-05	0.000280515	yes
STX3	ENSG00000166900	con72	vir_par72	OK	60.8113	259.294	2.09218	4.26392	6.47651	5e-05	0.000280515	yes
CD274	ENSG00000120217	con72	vir_par72	OK	0.499201	2.12779	2.09167	4.26241	2.13216	5e-05	0.000280515	yes
PPP1R15B	ENSG00000158615	con72	vir_par72	OK	47.4442	202.04	2.09034	4.25848	5.91479	5e-05	0.000280515	yes
HSP90B2P	ENSG00000259706	con72	vir_par72	OK	28.4494	121.043	2.08906	4.25471	6.36916	5e-05	0.000280515	yes
NFKB1	ENSG00000109320	con72	vir_par72	OK	11.163	47.4906	2.08891	4.25427	4.08811	5e-05	0.000280515	yes
TFAP2E	ENSG00000116819	con72	vir_par72	OK	0.328481	1.39413	2.08548	4.24416	2.80867	5e-05	0.000280515	yes
GEMIN8P4	ENSG00000228175	con72	vir_par72	OK	0.414258	1.7571	2.08459	4.24155	2.0294	0.0056	0.0206091	yes
MICA	ENSG00000204520	con72	vir_par72	OK	9.85449	41.7381	2.08251	4.23543	3.35661	5e-05	0.000280515	yes
KLF4	ENSG00000136826	con72	vir_par72	OK	8.11357	34.3561	2.08216	4.23441	6.09036	5e-05	0.000280515	yes
RP5-1159O4.2	ENSG00000272732	con72	vir_par72	OK	0.256726	1.08518	2.07963	4.22699	2.29666	5e-05	0.000280515	yes
DNAJB4	ENSG00000162616	con72	vir_par72	OK	27.632	116.777	2.07934	4.22614	5.1314	5e-05	0.000280515	yes
SYBU	ENSG00000147642	con72	vir_par72	OK	0.782248	3.29864	2.07617	4.21686	1.60734	5e-05	0.000280515	yes
PIK3C3	ENSG00000078142	con72	vir_par72	OK	22.0574	92.7821	2.07258	4.20638	1.04497	5e-05	0.000280515	yes
MAP3K8	ENSG00000107968	con72	vir_par72	OK	4.78907	20.1331	2.07175	4.20396	4.06054	5e-05	0.000280515	yes
NFIL3	ENSG00000165030	con72	vir_par72	OK	8.37725	35.2151	2.07164	4.20364	6.02907	5e-05	0.000280515	yes
BRF2	ENSG00000104221	con72	vir_par72	OK	5.87557	24.6879	2.071	4.20178	4.25333	5e-05	0.000280515	yes
BACH1	ENSG00000156273	con72	vir_par72	OK	35.4745	148.906	2.06955	4.19756	4.72374	5e-05	0.000280515	yes
PANX2	ENSG00000073150	con72	vir_par72	OK	0.850078	3.56675	2.06894	4.19578	3.76925	5e-05	0.000280515	yes
TBC1D22B	ENSG00000065491	con72	vir_par72	OK	11.6743	48.9406	2.06769	4.19215	6.58882	5e-05	0.000280515	yes
CDC25A	ENSG00000164045	con72	vir_par72	OK	5.32441	22.3146	2.0673	4.19102	5.36681	5e-05	0.000280515	yes
FLNC	ENSG00000128591	con72	vir_par72	OK	6.25017	26.1689	2.06589	4.18692	3.71561	5e-05	0.000280515	yes
ALYREF	ENSG00000183684	con72	vir_par72	OK	14.0446	58.6887	2.06307	4.17875	1.69384	5e-05	0.000280515	yes
CITED2	ENSG00000164442	con72	vir_par72	OK	5.71799	23.8472	2.06024	4.17056	5.21155	5e-05	0.000280515	yes
PNRC1	ENSG00000146278	con72	vir_par72	OK	41.3969	172.629	2.06008	4.17009	5.65951	5e-05	0.000280515	yes
RP11-553L6.5	ENSG00000259976	con72	vir_par72	OK	1.30702	5.45006	2.05999	4.16983	3.60997	5e-05	0.000280515	yes
HIC2	ENSG00000169635	con72	vir_par72	OK	1.65702	6.89887	2.05777	4.16342	5.35007	5e-05	0.000280515	yes
BDKRB2	ENSG00000168398	con72	vir_par72	OK	4.08599	16.9909	2.05601	4.15835	5.83759	5e-05	0.000280515	yes
ADIPOR2	ENSG00000006831	con72	vir_par72	OK	70.1369	291.602	2.05575	4.1576	6.2471	5e-05	0.000280515	yes
NUS1P1	ENSG00000235636	con72	vir_par72	OK	19.8742	82.6072	2.05537	4.1565	5.80225	5e-05	0.000280515	yes
ARHGAP10	ENSG00000071205	con72	vir_par72	OK	4.81351	19.9959	2.05454	4.15411	4.56037	5e-05	0.000280515	yes
ZNF274	ENSG00000171606	con72	vir_par72	OK	0.693095	2.86872	2.04928	4.13899	1.63213	5e-05	0.000280515	yes
UBAP1	ENSG00000165006	con72	vir_par72	OK	31.4167	129.966	2.04853	4.13684	6.70428	5e-05	0.000280515	yes
SPTY2D1	ENSG00000179119	con72	vir_par72	OK	19.598	81.0566	2.04823	4.13598	5.38797	5e-05	0.000280515	yes
NEDD4L	ENSG00000049759	con72	vir_par72	OK	69.0264	285.391	2.04772	4.13452	1.35221	5e-05	0.000280515	yes
ARHGAP23	ENSG00000225485	con72	vir_par72	OK	4.91161	20.2438	2.04321	4.12162	2.38917	5e-05	0.000280515	yes
IL4R	ENSG00000077238	con72	vir_par72	OK	7.23435	29.7189	2.03845	4.10804	3.81013	5e-05	0.000280515	yes
RFPL3S	ENSG00000205853	con72	vir_par72	OK	1.19332	4.90014	2.03785	4.10633	2.10843	5e-05	0.000280515	yes
PIGA	ENSG00000165195	con72	vir_par72	OK	9.1302	37.4813	2.03745	4.10519	2.16941	5e-05	0.000280515	yes
SUCO	ENSG00000094975	con72	vir_par72	OK	29.7457	121.844	2.03428	4.09618	5.96273	5e-05	0.000280515	yes
MCPH1	ENSG00000147316	con72	vir_par72	OK	18.7705	76.8628	2.03382	4.09488	6.36367	5e-05	0.000280515	yes
JPH1	ENSG00000104369	con72	vir_par72	OK	4.79746	19.6411	2.03353	4.09405	4.88195	5e-05	0.000280515	yes
SPSB1	ENSG00000171621	con72	vir_par72	OK	4.26593	17.464	2.03345	4.09383	5.48927	5e-05	0.000280515	yes
IFITM10	ENSG00000244242	con72	vir_par72	OK	0.640214	2.61445	2.02988	4.08371	1.46156	0.0005	0.00237265	yes
PPP1R13B	ENSG00000088808	con72	vir_par72	OK	5.12021	20.909	2.02985	4.08362	3.49549	5e-05	0.000280515	yes
MPZL3	ENSG00000160588	con72	vir_par72	OK	32.0945	130.669	2.02552	4.07139	5.48329	5e-05	0.000280515	yes
SLC22A3	ENSG00000146477	con72	vir_par72	OK	0.638497	2.59574	2.0234	4.06541	3.57297	5e-05	0.000280515	yes
WIPI1	ENSG00000070540	con72	vir_par72	OK	17.9774	73.0515	2.02273	4.06352	1.72019	5e-05	0.000280515	yes
PIM1	ENSG00000137193	con72	vir_par72	OK	17.3035	70.2276	2.02098	4.05859	6.13218	5e-05	0.000280515	yes
TREML3P	ENSG00000184106	con72	vir_par72	OK	4.32473	17.5438	2.02028	4.05663	2.99114	5e-05	0.000280515	yes
SLC2A3	ENSG00000059804	con72	vir_par72	OK	25.5224	103.493	2.0197	4.05499	3.81666	5e-05	0.000280515	yes
DAPK3	ENSG00000167657	con72	vir_par72	OK	5.43466	21.9543	2.01424	4.03968	3.97159	5e-05	0.000280515	yes
SLC25A42	ENSG00000181035	con72	vir_par72	OK	1.97554	7.97776	2.01374	4.03828	3.10027	5e-05	0.000280515	yes
AC016831.7	ENSG00000233559	con72	vir_par72	OK	0.835724	3.3747	2.01366	4.03805	2.34064	5e-05	0.000280515	yes
ENTPD7	ENSG00000198018	con72	vir_par72	OK	5.83067	23.5403	2.0134	4.03733	3.15838	5e-05	0.000280515	yes
HBEGF	ENSG00000113070	con72	vir_par72	OK	6.89881	27.8308	2.01226	4.03414	5.33772	5e-05	0.000280515	yes
OSER1	ENSG00000132823	con72	vir_par72	OK	58.8346	237.038	2.01038	4.02888	6.8207	5e-05	0.000280515	yes
ZBTB5	ENSG00000168795	con72	vir_par72	OK	12.8413	51.6603	2.00826	4.02297	6.70425	5e-05	0.000280515	yes
SNHG17	ENSG00000196756	con72	vir_par72	OK	21.3227	85.6237	2.00562	4.01561	4.15962	5e-05	0.000280515	yes
ZDHHC18	ENSG00000204160	con72	vir_par72	OK	11.8203	47.4616	2.00549	4.01525	3.95105	5e-05	0.000280515	yes
C16orf72	ENSG00000182831	con72	vir_par72	OK	10.4189	41.8182	2.00493	4.01369	3.54611	5e-05	0.000280515	yes
YOD1	ENSG00000180667	con72	vir_par72	OK	12.8977	51.6979	2.00299	4.0083	3.69181	5e-05	0.000280515	yes
IRGQ	ENSG00000167378	con72	vir_par72	OK	5.15074	20.5903	1.99911	3.99753	4.48111	5e-05	0.000280515	yes
C12orf49	ENSG00000111412	con72	vir_par72	OK	22.7926	91.1063	1.99898	3.99717	6.56635	5e-05	0.000280515	yes
CPEB2	ENSG00000137449	con72	vir_par72	OK	0.688309	2.75097	1.99881	3.9967	2.39021	5e-05	0.000280515	yes
PTPRH	ENSG00000080031	con72	vir_par72	OK	4.63645	18.5221	1.99815	3.99487	2.63876	5e-05	0.000280515	yes
SLTM	ENSG00000137776	con72	vir_par72	OK	40.4829	161.588	1.99694	3.99152	3.43536	5e-05	0.000280515	yes
TOX4P1	ENSG00000248697	con72	vir_par72	OK	1.70119	6.78835	1.99651	3.99034	4.05264	5e-05	0.000280515	yes
IKBKG	ENSG00000073009	con72	vir_par72	OK	0.990664	3.9524	1.99626	3.98964	1.24976	5e-05	0.000280515	yes
ALKBH1	ENSG00000100601	con72	vir_par72	OK	8.21113	32.7536	1.996	3.98893	5.30998	5e-05	0.000280515	yes
B3GNT5	ENSG00000176597	con72	vir_par72	OK	11.0312	43.868	1.99158	3.97672	5.71092	5e-05	0.000280515	yes
C12orf44	ENSG00000123395	con72	vir_par72	OK	14.4108	57.2962	1.99129	3.97592	5.3013	5e-05	0.000280515	yes
EAF2	ENSG00000145088	con72	vir_par72	OK	3.59355	14.2796	1.99047	3.97366	3.95911	5e-05	0.000280515	yes
MTRF1L	ENSG00000112031	con72	vir_par72	OK	2.39325	9.48649	1.98691	3.96387	3.35299	5e-05	0.000280515	yes
TNKS2	ENSG00000107854	con72	vir_par72	OK	30.5249	120.985	1.98678	3.96351	6.32722	5e-05	0.000280515	yes
PPP3CC	ENSG00000120910	con72	vir_par72	OK	7.54369	29.8867	1.98616	3.96181	2.75084	5e-05	0.000280515	yes
RP5-837I24.1	ENSG00000227288	con72	vir_par72	OK	0.395893	1.56675	1.98459	3.9575	2.83521	5e-05	0.000280515	yes
BMP2	ENSG00000125845	con72	vir_par72	OK	0.612844	2.42382	1.98369	3.95503	3.78036	5e-05	0.000280515	yes
LRP8	ENSG00000157193	con72	vir_par72	OK	6.55632	25.9248	1.98337	3.95416	3.54714	5e-05	0.000280515	yes
RP11-1277A3.1	ENSG00000247679	con72	vir_par72	OK	0.907006	3.57405	1.97838	3.9405	2.98067	5e-05	0.000280515	yes
SEC23B	ENSG00000101310	con72	vir_par72	OK	100.787	396.861	1.97732	3.93761	5.06183	5e-05	0.000280515	yes
CDKL1	ENSG00000100490	con72	vir_par72	OK	4.84027	19.0557	1.97706	3.9369	0.947102	0.001	0.00444512	yes
GCLM	ENSG00000023909	con72	vir_par72	OK	8.08939	31.8312	1.97634	3.93494	5.55639	5e-05	0.000280515	yes
ZNF430	ENSG00000118620	con72	vir_par72	OK	22.1557	86.9215	1.97203	3.9232	3.34797	5e-05	0.000280515	yes
LATS2	ENSG00000150457	con72	vir_par72	OK	10.8046	42.3701	1.9714	3.92148	6.45456	5e-05	0.000280515	yes
PDXDC2P	ENSG00000196696	con72	vir_par72	OK	2.13868	8.37997	1.97023	3.91831	3.63229	5e-05	0.000280515	yes
MFSD9	ENSG00000135953	con72	vir_par72	OK	9.92672	38.8681	1.9692	3.91551	3.44584	5e-05	0.000280515	yes
RP11-1217F2.1	ENSG00000235095	con72	vir_par72	OK	1.04356	4.0832	1.96818	3.91274	3.56263	5e-05	0.000280515	yes
GOSR2,RP11-156P1.2	ENSG00000108433	con72	vir_par72	OK	23.6883	92.6162	1.96709	3.90979	5.27633	5e-05	0.000280515	yes
SOGA2	ENSG00000168502	con72	vir_par72	OK	0.822929	3.20832	1.96298	3.89866	1.12639	5e-05	0.000280515	yes
JOSD1	ENSG00000100221	con72	vir_par72	OK	66.7074	260.042	1.96282	3.89823	5.05965	5e-05	0.000280515	yes
PAK1IP1	ENSG00000111845	con72	vir_par72	OK	21.5949	84.1425	1.96215	3.89642	6.08671	5e-05	0.000280515	yes
ARRDC2	ENSG00000105643	con72	vir_par72	OK	6.54801	25.4319	1.95751	3.88391	4.1967	5e-05	0.000280515	yes
PRPF38AP1	ENSG00000225053	con72	vir_par72	OK	0.650439	2.52492	1.95675	3.88187	2.77674	5e-05	0.000280515	yes
ZNF140	ENSG00000196387	con72	vir_par72	OK	16.3756	63.5406	1.95613	3.8802	5.15198	5e-05	0.000280515	yes
ARFIP2	ENSG00000132254	con72	vir_par72	OK	33.7023	130.707	1.95542	3.87829	6.15695	5e-05	0.000280515	yes
NRBF2	ENSG00000148572	con72	vir_par72	OK	10.1964	39.4324	1.95132	3.86728	5.49929	5e-05	0.000280515	yes
ALG2	ENSG00000119523	con72	vir_par72	OK	33.2152	128.257	1.94912	3.86139	6.12106	5e-05	0.000280515	yes
FOXO3	ENSG00000118689	con72	vir_par72	OK	6.16842	23.797	1.94781	3.85788	6.29268	5e-05	0.000280515	yes
MEF2D	ENSG00000116604	con72	vir_par72	OK	7.95896	30.6787	1.94659	3.85462	5.73978	5e-05	0.000280515	yes
CCNJ	ENSG00000107443	con72	vir_par72	OK	5.2733	20.2955	1.94438	3.84872	4.57968	5e-05	0.000280515	yes
WWC2	ENSG00000151718	con72	vir_par72	OK	5.24159	20.1612	1.94351	3.8464	4.37144	5e-05	0.000280515	yes
RHOV	ENSG00000104140	con72	vir_par72	OK	3.01674	11.5996	1.94301	3.84507	4.38525	5e-05	0.000280515	yes
RNF10	ENSG00000022840	con72	vir_par72	OK	70.6382	271.528	1.94258	3.84392	3.92638	5e-05	0.000280515	yes
RP11-21L23.2	ENSG00000261578	con72	vir_par72	OK	2.12144	8.14581	1.94102	3.83977	4.67504	5e-05	0.000280515	yes
LINS	ENSG00000140471	con72	vir_par72	OK	16.5172	63.412	1.94079	3.83916	2.9528	5e-05	0.000280515	yes
VCP	ENSG00000165280	con72	vir_par72	OK	83.3716	319.861	1.93982	3.83658	5.83646	5e-05	0.000280515	yes
GMPPA	ENSG00000144591	con72	vir_par72	OK	48.8522	187.253	1.93849	3.83304	5.75742	5e-05	0.000280515	yes
LSMEM1	ENSG00000181016	con72	vir_par72	OK	1.12355	4.30613	1.93833	3.83262	0.62651	0.0131	0.0430305	yes
FBXO42	ENSG00000037637	con72	vir_par72	OK	9.1033	34.8613	1.93717	3.82954	4.00046	5e-05	0.000280515	yes
AC025335.1	ENSG00000179859	con72	vir_par72	OK	6.90399	26.4176	1.936	3.82643	5.37954	5e-05	0.000280515	yes
LITAF	ENSG00000189067	con72	vir_par72	OK	58.3623	222.89	1.93322	3.81907	4.29334	5e-05	0.000280515	yes
PTPRR	ENSG00000153233	con72	vir_par72	OK	3.25305	12.4186	1.93264	3.81753	4.19754	5e-05	0.000280515	yes
MGAT5	ENSG00000152127	con72	vir_par72	OK	12.7062	48.5024	1.93253	3.81724	2.67498	5e-05	0.000280515	yes
SLC25A32	ENSG00000164933	con72	vir_par72	OK	17.0756	65.15	1.93183	3.81539	4.08171	5e-05	0.000280515	yes
RP11-756P10.3	ENSG00000180015	con72	vir_par72	OK	4.93914	18.8439	1.93177	3.81523	4.39371	5e-05	0.000280515	yes
FOXA3	ENSG00000170608	con72	vir_par72	OK	10.2326	38.9906	1.92996	3.81045	5.63456	5e-05	0.000280515	yes
NFKBIZ	ENSG00000144802	con72	vir_par72	OK	7.00157	26.6511	1.92844	3.80643	2.76458	5e-05	0.000280515	yes
R3HDM4	ENSG00000198858	con72	vir_par72	OK	15.0007	57.0476	1.92714	3.80301	5.06294	5e-05	0.000280515	yes
EP400NL	ENSG00000185684	con72	vir_par72	OK	1.59429	6.05234	1.92458	3.79626	3.42157	5e-05	0.000280515	yes
RCAN1	ENSG00000159200	con72	vir_par72	OK	7.6115	28.8899	1.92431	3.79555	5.28345	5e-05	0.000280515	yes
XBP1	ENSG00000100219	con72	vir_par72	OK	164.217	623.143	1.92396	3.79463	6.50932	5e-05	0.000280515	yes
AC104135.4	ENSG00000230836	con72	vir_par72	OK	0.307006	1.16245	1.92083	3.78641	2.24831	5e-05	0.000280515	yes
CASP7	ENSG00000165806	con72	vir_par72	OK	16.4661	62.2258	1.91801	3.77901	5.84315	5e-05	0.000280515	yes
DYRK3	ENSG00000143479	con72	vir_par72	OK	3.95324	14.9062	1.91481	3.77064	4.71165	5e-05	0.000280515	yes
C3	ENSG00000125730	con72	vir_par72	OK	0.336523	1.26858	1.91444	3.76967	0.426973	5e-05	0.000280515	yes
MAP4K5	ENSG00000012983	con72	vir_par72	OK	15.4269	58.1308	1.91386	3.76816	2.73371	5e-05	0.000280515	yes
ZSWIM6	ENSG00000130449	con72	vir_par72	OK	7.00359	26.3844	1.91352	3.76727	5.98751	5e-05	0.000280515	yes
C16orf91	ENSG00000174109	con72	vir_par72	OK	3.90648	14.7065	1.91251	3.76464	3.87212	5e-05	0.000280515	yes
PLD6	ENSG00000179598	con72	vir_par72	OK	5.17951	19.4961	1.9123	3.76409	1.54079	0.0018	0.00754124	yes
MAP2K3	ENSG00000034152	con72	vir_par72	OK	7.29757	27.4376	1.91067	3.75984	4.54321	5e-05	0.000280515	yes
ANKHD1,ANKHD1-EIF4EBP3	ENSG00000131503	con72	vir_par72	OK	58.0302	218.037	1.9097	3.75731	3.09936	5e-05	0.000280515	yes
FKBP11	ENSG00000134285	con72	vir_par72	OK	14.3049	53.7055	1.90856	3.75434	1.34713	0.00065	0.00300853	yes
PPAP2B	ENSG00000162407	con72	vir_par72	OK	6.62992	24.8746	1.90761	3.75187	3.14488	5e-05	0.000280515	yes
ARL4D	ENSG00000175906	con72	vir_par72	OK	3.8912	14.5739	1.9051	3.74535	4.36578	5e-05	0.000280515	yes
FOSL2	ENSG00000075426	con72	vir_par72	OK	17.0001	63.6709	1.90509	3.74532	6.44147	5e-05	0.000280515	yes
KDM5B	ENSG00000117139	con72	vir_par72	OK	9.81949	36.7591	1.90438	3.74348	4.99135	5e-05	0.000280515	yes
KCNK5	ENSG00000164626	con72	vir_par72	OK	5.8747	21.9865	1.90403	3.74257	5.59035	5e-05	0.000280515	yes
PLEKHM1	ENSG00000225190	con72	vir_par72	OK	5.84307	21.8642	1.90377	3.7419	3.12681	5e-05	0.000280515	yes
GOLGA3	ENSG00000090615	con72	vir_par72	OK	9.1426	34.2033	1.90346	3.74109	0.831065	5e-05	0.000280515	yes
PER1	ENSG00000179094	con72	vir_par72	OK	9.17124	34.3032	1.90315	3.74029	1.94454	5e-05	0.000280515	yes
RP11-37B2.1	ENSG00000251136	con72	vir_par72	OK	2.82193	10.5512	1.90266	3.73902	3.05202	5e-05	0.000280515	yes
ZNF10	ENSG00000256223	con72	vir_par72	OK	8.53562	31.9057	1.90225	3.73796	1.90785	5e-05	0.000280515	yes
ISG20	ENSG00000172183	con72	vir_par72	OK	6.3849	23.8499	1.90125	3.73537	2.66183	5e-05	0.000280515	yes
KIAA0513	ENSG00000135709	con72	vir_par72	OK	4.65584	17.3603	1.89868	3.72872	3.64739	5e-05	0.000280515	yes
DDX26B	ENSG00000165359	con72	vir_par72	OK	3.49903	13.0268	1.89646	3.72299	4.54313	5e-05	0.000280515	yes
ZNF503	ENSG00000165655	con72	vir_par72	OK	1.3472	5.00921	1.89462	3.71824	3.62275	5e-05	0.000280515	yes
TIMM10B	ENSG00000132286	con72	vir_par72	OK	25.1517	93.51	1.89446	3.71783	5.3091	5e-05	0.000280515	yes
COQ10A	ENSG00000135469	con72	vir_par72	OK	4.17309	15.5118	1.89418	3.71711	3.47292	5e-05	0.000280515	yes
MYLIP	ENSG00000007944	con72	vir_par72	OK	7.59664	28.2271	1.89365	3.71574	5.29142	5e-05	0.000280515	yes
CDK11B	ENSG00000248333	con72	vir_par72	OK	5.47164	20.33	1.89356	3.71551	2.03756	5e-05	0.000280515	yes
NAMPT	ENSG00000105835	con72	vir_par72	OK	52.648	195.548	1.89307	3.71425	3.4641	5e-05	0.000280515	yes
ZSCAN21	ENSG00000166529	con72	vir_par72	OK	8.42882	31.2564	1.89075	3.70828	2.63475	5e-05	0.000280515	yes
NANS	ENSG00000095380	con72	vir_par72	OK	22.78	84.4726	1.89071	3.70818	4.59134	5e-05	0.000280515	yes
ZNF79	ENSG00000196152	con72	vir_par72	OK	2.51469	9.31955	1.88988	3.70604	4.45116	5e-05	0.000280515	yes
AKAP8	ENSG00000105127	con72	vir_par72	OK	4.8941	18.0838	1.88558	3.69501	2.66181	5e-05	0.000280515	yes
C6orf106	ENSG00000196821	con72	vir_par72	OK	41.1132	151.862	1.88509	3.69376	6.54864	5e-05	0.000280515	yes
IBTK	ENSG00000005700	con72	vir_par72	OK	46.2991	170.995	1.8849	3.69327	6.39047	5e-05	0.000280515	yes
PTHLH	ENSG00000087494	con72	vir_par72	OK	0.387334	1.43018	1.88454	3.69235	1.6853	5e-05	0.000280515	yes
THUMPD2	ENSG00000138050	con72	vir_par72	OK	10.6848	39.4488	1.88443	3.69207	4.54597	5e-05	0.000280515	yes
TADA2B	ENSG00000173011	con72	vir_par72	OK	7.69602	28.4101	1.88422	3.69153	3.08187	5e-05	0.000280515	yes
OVOL1	ENSG00000172818	con72	vir_par72	OK	6.29159	23.2229	1.88405	3.6911	5.28644	5e-05	0.000280515	yes
CYLD	ENSG00000083799	con72	vir_par72	OK	12.0294	44.1591	1.87614	3.67092	4.08983	5e-05	0.000280515	yes
AKAP13	ENSG00000170776	con72	vir_par72	OK	11.3846	41.7344	1.87415	3.66586	2.58895	5e-05	0.000280515	yes
PRPF39	ENSG00000185246	con72	vir_par72	OK	19.1152	69.9964	1.87256	3.66182	3.63815	5e-05	0.000280515	yes
SLC12A4	ENSG00000124067	con72	vir_par72	OK	12.7376	46.6098	1.87154	3.65923	3.30916	5e-05	0.000280515	yes
RAB12	ENSG00000206418	con72	vir_par72	OK	10.8568	39.6201	1.86764	3.64935	4.16328	5e-05	0.000280515	yes
BCL10	ENSG00000142867	con72	vir_par72	OK	15.2463	55.632	1.86745	3.64887	3.3387	5e-05	0.000280515	yes
SLC25A33	ENSG00000171612	con72	vir_par72	OK	2.42133	8.83168	1.86689	3.64745	4.61552	5e-05	0.000280515	yes
PRPF4	ENSG00000136875	con72	vir_par72	OK	31.475	114.742	1.86611	3.64548	4.22541	5e-05	0.000280515	yes
USP12	ENSG00000152484	con72	vir_par72	OK	27.133	98.884	1.86569	3.64442	6.46026	5e-05	0.000280515	yes
B4GALT5	ENSG00000158470	con72	vir_par72	OK	43.7024	159.115	1.86429	3.64089	6.55291	5e-05	0.000280515	yes
yR211F11.2	ENSG00000213076	con72	vir_par72	OK	0.405876	1.47654	1.86311	3.63791	1.73655	0.00175	0.00735233	yes
FAM46C	ENSG00000183508	con72	vir_par72	OK	1.82246	6.62703	1.86247	3.6363	4.70319	5e-05	0.000280515	yes
ARID3B	ENSG00000179361	con72	vir_par72	OK	1.4397	5.23408	1.86217	3.63554	1.28574	0.0014	0.00601694	yes
SYVN1	ENSG00000162298	con72	vir_par72	OK	29.5826	107.495	1.86145	3.63373	2.24847	5e-05	0.000280515	yes
TAF4B	ENSG00000141384	con72	vir_par72	OK	5.16579	18.7569	1.86036	3.63098	5.12826	5e-05	0.000280515	yes
RELL1	ENSG00000181826	con72	vir_par72	OK	5.0945	18.4741	1.85849	3.62628	3.29222	5e-05	0.000280515	yes
FXR2	ENSG00000129245	con72	vir_par72	OK	14.2542	51.6673	1.85787	3.62472	1.37891	5e-05	0.000280515	yes
PHLDA1	ENSG00000139289	con72	vir_par72	OK	23.7626	86.0717	1.85685	3.62216	6.43999	5e-05	0.000280515	yes
KIF1A	ENSG00000130294	con72	vir_par72	OK	0.283643	1.02634	1.85536	3.61842	0.822459	0.0004	0.00193713	yes
NRBF2P3	ENSG00000237415	con72	vir_par72	OK	0.519784	1.88058	1.85519	3.61799	2.30008	5e-05	0.000280515	yes
GOLGA5	ENSG00000066455	con72	vir_par72	OK	20.2639	73.3057	1.85501	3.61754	6.0902	5e-05	0.000280515	yes
SRP19	ENSG00000153037	con72	vir_par72	OK	28.9718	104.78	1.85464	3.61661	2.52044	5e-05	0.000280515	yes
TMEM136	ENSG00000181264	con72	vir_par72	OK	6.99516	25.249	1.8518	3.6095	3.56614	5e-05	0.000280515	yes
ARID3A	ENSG00000116017	con72	vir_par72	OK	1.76696	6.37736	1.85169	3.60923	2.4421	5e-05	0.000280515	yes
KRT80	ENSG00000167767	con72	vir_par72	OK	17.7683	64.13	1.85169	3.60923	6.21556	5e-05	0.000280515	yes
NECAP1	ENSG00000089818	con72	vir_par72	OK	53.572	193.352	1.85168	3.6092	4.13355	5e-05	0.000280515	yes
MXD1	ENSG00000059728	con72	vir_par72	OK	7.53919	27.1803	1.85008	3.6052	4.75792	5e-05	0.000280515	yes
FNDC3B	ENSG00000075420	con72	vir_par72	OK	31.2257	112.572	1.85005	3.60513	3.15009	5e-05	0.000280515	yes
TMEM55B	ENSG00000165782	con72	vir_par72	OK	21.0513	75.8325	1.84891	3.60228	2.01486	5e-05	0.000280515	yes
DCUN1D2	ENSG00000150401	con72	vir_par72	OK	18.9475	68.2003	1.84777	3.59943	3.74058	5e-05	0.000280515	yes
TSC22D3	ENSG00000157514	con72	vir_par72	OK	30.0338	108.059	1.84716	3.59791	6.1201	5e-05	0.000280515	yes
ITPRIP	ENSG00000148841	con72	vir_par72	OK	0.588358	2.11514	1.84599	3.595	3.37153	5e-05	0.000280515	yes
SEC14L2	ENSG00000100003	con72	vir_par72	OK	4.81458	17.2922	1.84464	3.59163	1.5613	5e-05	0.000280515	yes
POFUT2	ENSG00000186866	con72	vir_par72	OK	17.9495	64.4263	1.8437	3.58929	3.30735	5e-05	0.000280515	yes
MIR4435-1HG	ENSG00000172965	con72	vir_par72	OK	53.0861	190.088	1.84026	3.58075	4.59999	5e-05	0.000280515	yes
P2RX4	ENSG00000135124	con72	vir_par72	OK	15.9038	56.9361	1.83998	3.58005	4.88998	5e-05	0.000280515	yes
CAMSAP1	ENSG00000130559	con72	vir_par72	OK	8.39495	29.9737	1.83611	3.57046	5.57419	5e-05	0.000280515	yes
ARHGAP29	ENSG00000137962	con72	vir_par72	OK	21.8081	77.7694	1.83434	3.56608	6.22688	5e-05	0.000280515	yes
ARID4A	ENSG00000032219	con72	vir_par72	OK	4.67419	16.647	1.83248	3.56149	2.91886	5e-05	0.000280515	yes
DIMT1	ENSG00000086189	con72	vir_par72	OK	12.4123	44.1953	1.83212	3.5606	2.32408	5e-05	0.000280515	yes
PTBP2	ENSG00000117569	con72	vir_par72	OK	12.451	44.333	1.83212	3.5606	3.95449	5e-05	0.000280515	yes
RPLP0P2	ENSG00000243742	con72	vir_par72	OK	0.782203	2.78494	1.83203	3.56038	1.46217	0.0003	0.00148912	yes
NFX1	ENSG00000086102	con72	vir_par72	OK	22.2739	79.2424	1.83092	3.55764	6.13905	5e-05	0.000280515	yes
METRNL	ENSG00000176845	con72	vir_par72	OK	3.84943	13.6861	1.83	3.55537	3.7884	5e-05	0.000280515	yes
ZNF805	ENSG00000204524	con72	vir_par72	OK	3.14084	11.1546	1.82842	3.55148	4.38162	5e-05	0.000280515	yes
CSRNP2	ENSG00000110925	con72	vir_par72	OK	12.2504	43.4636	1.82697	3.54791	4.27435	5e-05	0.000280515	yes
PI4K2A	ENSG00000155252	con72	vir_par72	OK	11.2789	39.9717	1.82536	3.54395	5.21414	5e-05	0.000280515	yes
SDC4	ENSG00000124145	con72	vir_par72	OK	77.538	274.754	1.82517	3.54349	6.4283	5e-05	0.000280515	yes
TXNRD1	ENSG00000198431	con72	vir_par72	OK	216.18	765.731	1.8246	3.54209	2.27114	5e-05	0.000280515	yes
ZRANB1	ENSG00000019995	con72	vir_par72	OK	16.1529	57.098	1.82165	3.53485	4.20094	5e-05	0.000280515	yes
RP11-389K14.3	ENSG00000231107	con72	vir_par72	OK	5.31078	18.7404	1.81916	3.52876	3.80566	5e-05	0.000280515	yes
NOMO2	ENSG00000185164	con72	vir_par72	OK	1.5937	5.62289	1.81894	3.52822	3.31682	5e-05	0.000280515	yes
ZNF473	ENSG00000142528	con72	vir_par72	OK	9.9343	35.0376	1.81841	3.52692	3.97476	5e-05	0.000280515	yes
PSMD11	ENSG00000108671	con72	vir_par72	OK	41.379	145.697	1.816	3.52104	5.06753	5e-05	0.000280515	yes
HELQ	ENSG00000163312	con72	vir_par72	OK	8.6851	30.5616	1.8151	3.51884	3.992	5e-05	0.000280515	yes
BTG2	ENSG00000159388	con72	vir_par72	OK	31.5863	111.095	1.81442	3.51718	6.19999	5e-05	0.000280515	yes
ELL2	ENSG00000118985	con72	vir_par72	OK	3.72183	13.0878	1.81413	3.51648	1.18993	0.0001	0.000538822	yes
FUT1	ENSG00000174951	con72	vir_par72	OK	12.0705	42.4395	1.81392	3.51596	4.25715	5e-05	0.000280515	yes
CLU	ENSG00000120885	con72	vir_par72	OK	65.6435	230.482	1.81193	3.51112	4.02408	5e-05	0.000280515	yes
PARD6B	ENSG00000124171	con72	vir_par72	OK	27.4217	96.1146	1.80944	3.50506	6.2061	5e-05	0.000280515	yes
ZNF431	ENSG00000196705	con72	vir_par72	OK	10.9423	38.341	1.80897	3.50392	3.04959	5e-05	0.000280515	yes
NPIPB3	ENSG00000169246	con72	vir_par72	OK	2.76866	9.69421	1.80794	3.50142	2.88438	5e-05	0.000280515	yes
PCSK5	ENSG00000099139	con72	vir_par72	OK	0.298273	1.04364	1.80692	3.49895	1.99887	5e-05	0.000280515	yes
DHDH	ENSG00000104808	con72	vir_par72	OK	1.45542	5.09011	1.80626	3.49734	2.45071	5e-05	0.000280515	yes
CTD-2369P2.2	ENSG00000175898	con72	vir_par72	OK	3.05131	10.6667	1.80561	3.49577	1.81265	0.00015	0.000786087	yes
PITHD1	ENSG00000057757	con72	vir_par72	OK	17.5591	61.3453	1.80473	3.49364	5.09307	5e-05	0.000280515	yes
CNOT4	ENSG00000080802	con72	vir_par72	OK	12.2532	42.7993	1.80443	3.49291	5.22118	5e-05	0.000280515	yes
TMEFF1	ENSG00000241697	con72	vir_par72	OK	2.02632	7.07175	1.80321	3.48996	2.25089	5e-05	0.000280515	yes
RAB32	ENSG00000118508	con72	vir_par72	OK	9.52604	33.1982	1.80116	3.485	4.79203	5e-05	0.000280515	yes
GNA13	ENSG00000120063	con72	vir_par72	OK	28.9834	100.992	1.80094	3.48447	6.26051	5e-05	0.000280515	yes
EXOC8	ENSG00000116903	con72	vir_par72	OK	8.86111	30.8497	1.7997	3.48148	4.94899	5e-05	0.000280515	yes
PSPC1	ENSG00000121390	con72	vir_par72	OK	35.219	122.281	1.79578	3.47203	3.91066	5e-05	0.000280515	yes
COQ10B	ENSG00000115520	con72	vir_par72	OK	24.4998	85.0417	1.7954	3.47112	5.3399	5e-05	0.000280515	yes
MTMR11	ENSG00000014914	con72	vir_par72	OK	0.898405	3.11244	1.79261	3.46441	2.19126	5e-05	0.000280515	yes
RWDD2A	ENSG00000013392	con72	vir_par72	OK	5.59572	19.3827	1.79238	3.46386	1.45121	0.00045	0.00215616	yes
DNTTIP2	ENSG00000067334	con72	vir_par72	OK	40.732	140.937	1.79081	3.46009	3.12431	5e-05	0.000280515	yes
NOP2	ENSG00000111641	con72	vir_par72	OK	32.8815	113.581	1.78837	3.45424	4.02867	5e-05	0.000280515	yes
BYSL	ENSG00000112578	con72	vir_par72	OK	11.5793	39.9875	1.78801	3.45338	4.9392	5e-05	0.000280515	yes
GPR115	ENSG00000153294	con72	vir_par72	OK	5.35056	18.4686	1.78731	3.45171	4.90201	5e-05	0.000280515	yes
PSMD10P2	ENSG00000226652	con72	vir_par72	OK	0.624744	2.15577	1.78687	3.45065	1.85733	0.00035	0.0017153	yes
ADPRHL2	ENSG00000116863	con72	vir_par72	OK	5.61118	19.3586	1.7866	3.45001	4.48307	5e-05	0.000280515	yes
CIDECP	ENSG00000186162	con72	vir_par72	OK	4.60765	15.8787	1.78499	3.44616	3.57691	5e-05	0.000280515	yes
RP11-63E5.6	ENSG00000249868	con72	vir_par72	OK	0.398808	1.37306	1.78363	3.44291	1.79331	0.0002	0.00102556	yes
NTMT1	ENSG00000148335	con72	vir_par72	OK	15.1534	52.1491	1.783	3.44141	4.18233	5e-05	0.000280515	yes
SAFB2	ENSG00000130254	con72	vir_par72	OK	14.4567	49.7064	1.7817	3.43831	2.37239	5e-05	0.000280515	yes
AP5Z1	ENSG00000242802	con72	vir_par72	OK	2.10241	7.22736	1.78143	3.43767	3.15138	5e-05	0.000280515	yes
ANKRD17	ENSG00000132466	con72	vir_par72	OK	23.4394	80.5744	1.78138	3.43755	3.99	5e-05	0.000280515	yes
CDKL5	ENSG00000008086	con72	vir_par72	OK	2.28744	7.84957	1.77888	3.4316	4.37528	5e-05	0.000280515	yes
F2RL1	ENSG00000164251	con72	vir_par72	OK	40.8085	140.01	1.77859	3.43091	5.11677	5e-05	0.000280515	yes
AGO3	ENSG00000126070	con72	vir_par72	OK	5.63549	19.3084	1.77661	3.4262	2.80427	5e-05	0.000280515	yes
GDF15	ENSG00000130513	con72	vir_par72	OK	77.5895	265.797	1.77639	3.42568	5.60923	5e-05	0.000280515	yes
CLP1	ENSG00000172409	con72	vir_par72	OK	24.0499	82.3777	1.77622	3.42528	4.03455	5e-05	0.000280515	yes
VPS18	ENSG00000104142	con72	vir_par72	OK	12.979	44.4123	1.77478	3.42186	3.73623	5e-05	0.000280515	yes
NTN4	ENSG00000074527	con72	vir_par72	OK	3.27919	11.2189	1.77452	3.42124	3.90379	5e-05	0.000280515	yes
UBC	ENSG00000150991	con72	vir_par72	OK	463.223	1581.99	1.77196	3.41518	3.25071	5e-05	0.000280515	yes
ARHGAP17	ENSG00000140750	con72	vir_par72	OK	13.2632	45.2876	1.77169	3.41454	3.55495	5e-05	0.000280515	yes
IGFL4	ENSG00000204869	con72	vir_par72	OK	3.33233	11.361	1.76948	3.40931	2.55068	5e-05	0.000280515	yes
ZNF697	ENSG00000143067	con72	vir_par72	OK	5.30376	18.0747	1.76888	3.40789	5.23453	5e-05	0.000280515	yes
TERF2IP	ENSG00000166848	con72	vir_par72	OK	22.9894	78.3401	1.76878	3.40766	2.64293	5e-05	0.000280515	yes
MIOS	ENSG00000164654	con72	vir_par72	OK	18.6522	63.5246	1.76797	3.40574	3.84662	5e-05	0.000280515	yes
SCFD1	ENSG00000092108	con72	vir_par72	OK	41.4814	140.892	1.76406	3.39653	4.96583	5e-05	0.000280515	yes
TUBA1A	ENSG00000167552	con72	vir_par72	OK	12.3761	42.0277	1.76379	3.39589	1.85665	0.0002	0.00102556	yes
RIPK2	ENSG00000104312	con72	vir_par72	OK	5.10625	17.3356	1.7634	3.39497	4.41721	5e-05	0.000280515	yes
TTC4P1	ENSG00000221971	con72	vir_par72	OK	0.625648	2.12166	1.76177	3.39114	2.46763	5e-05	0.000280515	yes
FAM43A	ENSG00000185112	con72	vir_par72	OK	2.18226	7.39025	1.7598	3.38651	4.01105	5e-05	0.000280515	yes
AMN1	ENSG00000151743	con72	vir_par72	OK	30.8419	104.385	1.75895	3.38452	4.54697	5e-05	0.000280515	yes
TRIM36	ENSG00000152503	con72	vir_par72	OK	1.06321	3.59425	1.75727	3.38058	2.81052	5e-05	0.000280515	yes
KDM2A	ENSG00000173120	con72	vir_par72	OK	23.8654	80.5968	1.7558	3.37714	4.9467	5e-05	0.000280515	yes
MAP3K9	ENSG00000006432	con72	vir_par72	OK	4.59877	15.5294	1.75568	3.37685	5.22704	5e-05	0.000280515	yes
ZNF527	ENSG00000189164	con72	vir_par72	OK	9.14898	30.8885	1.75539	3.37618	3.60383	5e-05	0.000280515	yes
SLC25A13	ENSG00000004864	con72	vir_par72	OK	15.6654	52.8407	1.75407	3.37309	4.18183	5e-05	0.000280515	yes
SNX11	ENSG00000002919	con72	vir_par72	OK	22.9134	77.1835	1.7521	3.36849	4.38308	5e-05	0.000280515	yes
ASB1	ENSG00000065802	con72	vir_par72	OK	10.7083	36.0366	1.75074	3.36531	5.03695	5e-05	0.000280515	yes
SNRK	ENSG00000163788	con72	vir_par72	OK	7.27394	24.4746	1.75048	3.3647	3.55423	5e-05	0.000280515	yes
C19orf44	ENSG00000105072	con72	vir_par72	OK	2.38686	8.02955	1.75021	3.36408	0.863288	0.01325	0.0434554	yes
KCTD20	ENSG00000112078	con72	vir_par72	OK	35.5214	119.348	1.74841	3.35988	5.26136	5e-05	0.000280515	yes
SLC35A2	ENSG00000102100	con72	vir_par72	OK	32.0481	107.651	1.74805	3.35904	5.48258	5e-05	0.000280515	yes
EMP3	ENSG00000142227	con72	vir_par72	OK	24.6717	82.7378	1.74569	3.35355	4.10496	5e-05	0.000280515	yes
MPP3	ENSG00000161647	con72	vir_par72	OK	2.98018	9.98555	1.74444	3.35065	2.71035	5e-05	0.000280515	yes
C11orf68	ENSG00000175573	con72	vir_par72	OK	4.13924	13.851	1.74255	3.34626	3.80678	5e-05	0.000280515	yes
POLR3D	ENSG00000168495	con72	vir_par72	OK	9.38997	31.3916	1.74119	3.34311	4.175	5e-05	0.000280515	yes
GULP1	ENSG00000144366	con72	vir_par72	OK	37.8241	126.365	1.74022	3.34086	4.72119	5e-05	0.000280515	yes
FBXO30	ENSG00000118496	con72	vir_par72	OK	7.92561	26.4736	1.73996	3.34026	5.72118	5e-05	0.000280515	yes
ETV3	ENSG00000117036	con72	vir_par72	OK	22.735	75.9355	1.73986	3.34003	5.95774	5e-05	0.000280515	yes
TPST1	ENSG00000169902	con72	vir_par72	OK	8.56801	28.6012	1.73904	3.33813	3.33418	5e-05	0.000280515	yes
MCTP2	ENSG00000140563	con72	vir_par72	OK	8.13446	27.1529	1.73899	3.33801	3.50919	5e-05	0.000280515	yes
IER5	ENSG00000162783	con72	vir_par72	OK	13.3161	44.4369	1.73859	3.33709	5.36994	5e-05	0.000280515	yes
BCAR1	ENSG00000050820	con72	vir_par72	OK	3.64879	12.1663	1.7374	3.33434	3.08243	5e-05	0.000280515	yes
AKIRIN2	ENSG00000135334	con72	vir_par72	OK	41.9474	139.801	1.73672	3.33277	3.23928	5e-05	0.000280515	yes
CWC25	ENSG00000108296	con72	vir_par72	OK	9.1039	30.3309	1.73623	3.33163	4.34031	5e-05	0.000280515	yes
BRMS1	ENSG00000174744	con72	vir_par72	OK	11.6662	38.867	1.73621	3.33159	4.1248	5e-05	0.000280515	yes
HSP90AA4P	ENSG00000205100	con72	vir_par72	OK	1.43882	4.79173	1.73566	3.33032	3.08569	5e-05	0.000280515	yes
FAM47E-STBD1	ENSG00000118804	con72	vir_par72	OK	1.68531	5.61032	1.73507	3.32896	2.03612	5e-05	0.000280515	yes
DNAJC12	ENSG00000108176	con72	vir_par72	OK	0.38889	1.29389	1.73428	3.32713	1.20618	0.00025	0.00125904	yes
NOXRED1	ENSG00000165555	con72	vir_par72	OK	0.352691	1.17164	1.73206	3.32202	1.94836	5e-05	0.000280515	yes
CTU1	ENSG00000142544	con72	vir_par72	OK	1.27182	4.21707	1.72934	3.31576	3.13459	5e-05	0.000280515	yes
KIRREL	ENSG00000183853	con72	vir_par72	OK	7.26117	24.0658	1.72871	3.31431	5.45963	5e-05	0.000280515	yes
MRPS2	ENSG00000122140	con72	vir_par72	OK	12.3077	40.7726	1.72804	3.31277	4.00255	5e-05	0.000280515	yes
TMEM183A	ENSG00000163444	con72	vir_par72	OK	7.55107	24.9948	1.72687	3.31009	3.47015	5e-05	0.000280515	yes
SLC19A2	ENSG00000117479	con72	vir_par72	OK	16.8704	55.8258	1.72644	3.3091	5.52096	5e-05	0.000280515	yes
IRF1	ENSG00000125347	con72	vir_par72	OK	3.89591	12.889	1.72611	3.30835	4.14983	5e-05	0.000280515	yes
HIST1H2BN	ENSG00000233822	con72	vir_par72	OK	3.85292	12.7387	1.72519	3.30624	2.56685	5e-05	0.000280515	yes
USP12PX	ENSG00000226081	con72	vir_par72	OK	3.62278	11.9755	1.72492	3.30562	3.49265	5e-05	0.000280515	yes
TMEM241	ENSG00000134490	con72	vir_par72	OK	21.2607	70.0708	1.72063	3.2958	2.96899	5e-05	0.000280515	yes
TIFA	ENSG00000145365	con72	vir_par72	OK	9.6186	31.6697	1.7192	3.29254	2.53896	5e-05	0.000280515	yes
TBC1D20	ENSG00000125875	con72	vir_par72	OK	18.1954	59.9003	1.71899	3.29206	5.70866	5e-05	0.000280515	yes
CHST7	ENSG00000147119	con72	vir_par72	OK	0.674021	2.21786	1.7183	3.29048	2.89641	5e-05	0.000280515	yes
TES	ENSG00000135269	con72	vir_par72	OK	77.3259	254.119	1.71648	3.28634	5.38673	5e-05	0.000280515	yes
FKBP14	ENSG00000106080	con72	vir_par72	OK	26.6578	87.5789	1.71602	3.28529	1.98086	5e-05	0.000280515	yes
NMT2	ENSG00000152465	con72	vir_par72	OK	13.1068	43.0535	1.71582	3.28483	3.73061	5e-05	0.000280515	yes
WNK4	ENSG00000126562	con72	vir_par72	OK	1.23353	4.05129	1.71559	3.28431	1.61869	5e-05	0.000280515	yes
SRPR	ENSG00000182934	con72	vir_par72	OK	82.7092	271.573	1.71522	3.28347	4.81715	5e-05	0.000280515	yes
ZNF184	ENSG00000096654	con72	vir_par72	OK	10.2394	33.6029	1.71445	3.28172	5.2408	5e-05	0.000280515	yes
RP11-48B3.4	ENSG00000260317	con72	vir_par72	OK	0.468221	1.5365	1.71439	3.28158	2.26991	5e-05	0.000280515	yes
CDC6	ENSG00000094804	con72	vir_par72	OK	13.0834	42.9021	1.71332	3.27915	4.20606	5e-05	0.000280515	yes
RP1-239B22.5	ENSG00000260196	con72	vir_par72	OK	1.03298	3.38641	1.71294	3.27828	3.39353	5e-05	0.000280515	yes
SMAD3	ENSG00000166949	con72	vir_par72	OK	10.5179	34.4799	1.71292	3.27824	4.79444	5e-05	0.000280515	yes
PRDM1	ENSG00000057657	con72	vir_par72	OK	2.60538	8.537	1.71224	3.27669	1.93631	5e-05	0.000280515	yes
NUP98	ENSG00000110713	con72	vir_par72	OK	59.5684	195.136	1.71186	3.27583	2.66393	5e-05	0.000280515	yes
YY1AP1	ENSG00000163374	con72	vir_par72	OK	18.8523	61.588	1.70791	3.26687	2.70802	5e-05	0.000280515	yes
MKL1	ENSG00000196588	con72	vir_par72	OK	3.63751	11.8647	1.70566	3.26178	1.43361	5e-05	0.000280515	yes
SEC61A2	ENSG00000065665	con72	vir_par72	OK	4.1198	13.4322	1.70505	3.2604	0.951739	0.00155	0.00659446	yes
TBL2	ENSG00000106638	con72	vir_par72	OK	26.2268	85.4977	1.70484	3.25993	4.26411	5e-05	0.000280515	yes
SLC35E1	ENSG00000127526	con72	vir_par72	OK	20.2589	65.999	1.70389	3.25778	2.24237	5e-05	0.000280515	yes
DNAJB2	ENSG00000135924	con72	vir_par72	OK	19.2427	62.6734	1.70354	3.25699	3.73241	5e-05	0.000280515	yes
DDIT4	ENSG00000168209	con72	vir_par72	OK	273.871	891.75	1.70314	3.25609	5.52225	5e-05	0.000280515	yes
PCF11	ENSG00000165494	con72	vir_par72	OK	16.9783	55.2276	1.7017	3.25284	3.98978	5e-05	0.000280515	yes
IP6K1	ENSG00000176095	con72	vir_par72	OK	11.801	38.383	1.70157	3.25255	5.29765	5e-05	0.000280515	yes
UBE2O	ENSG00000175931	con72	vir_par72	OK	8.08857	26.3054	1.7014	3.25216	2.67633	5e-05	0.000280515	yes
ELF4	ENSG00000102034	con72	vir_par72	OK	7.0551	22.9409	1.70118	3.25167	4.59407	5e-05	0.000280515	yes
ACTR3B	ENSG00000133627	con72	vir_par72	OK	7.49873	24.3787	1.7009	3.25104	4.1	5e-05	0.000280515	yes
NIFKP1	ENSG00000214434	con72	vir_par72	OK	0.360906	1.17326	1.70083	3.25088	1.76529	0.00025	0.00125904	yes
GS1-124K5.12	ENSG00000232559	con72	vir_par72	OK	3.89877	12.6609	1.69929	3.24741	2.90436	5e-05	0.000280515	yes
CTR9	ENSG00000198730	con72	vir_par72	OK	24.1061	78.2316	1.69835	3.2453	4.74759	5e-05	0.000280515	yes
PRSS22	ENSG00000005001	con72	vir_par72	OK	4.83965	15.6997	1.69776	3.24397	2.83622	5e-05	0.000280515	yes
CSGALNACT2	ENSG00000169826	con72	vir_par72	OK	12.1477	39.4003	1.69752	3.24343	4.69107	5e-05	0.000280515	yes
SH3BP5	ENSG00000131370	con72	vir_par72	OK	11.4225	37.0109	1.69607	3.24017	4.63824	5e-05	0.000280515	yes
SPATA2	ENSG00000158480	con72	vir_par72	OK	3.02917	9.81194	1.69562	3.23916	4.23537	5e-05	0.000280515	yes
PNPLA8	ENSG00000135241	con72	vir_par72	OK	24.5527	79.4981	1.69504	3.23786	2.72868	5e-05	0.000280515	yes
IGFN1	ENSG00000163395	con72	vir_par72	OK	0.401155	1.29867	1.6948	3.23732	3.18332	5e-05	0.000280515	yes
SLC7A11	ENSG00000151012	con72	vir_par72	OK	77.5418	250.919	1.69418	3.23593	3.45772	5e-05	0.000280515	yes
PPM1D	ENSG00000170836	con72	vir_par72	OK	6.99508	22.5969	1.69172	3.23042	4.90554	5e-05	0.000280515	yes
EIF2S1	ENSG00000134001	con72	vir_par72	OK	154.613	499.099	1.69067	3.22807	2.84063	5e-05	0.000280515	yes
ST7	ENSG00000004866	con72	vir_par72	OK	16.8071	54.1873	1.68889	3.22409	3.41085	5e-05	0.000280515	yes
CEP85	ENSG00000130695	con72	vir_par72	OK	14.0817	45.3921	1.68862	3.22348	4.56624	5e-05	0.000280515	yes
AL645728.2	ENSG00000215791	con72	vir_par72	OK	3.14797	10.1457	1.68837	3.22292	1.62237	0.0005	0.00237265	yes
TMEM81	ENSG00000174529	con72	vir_par72	OK	2.53691	8.17622	1.68836	3.2229	3.40065	5e-05	0.000280515	yes
AC114755.3	ENSG00000227513	con72	vir_par72	OK	0.45713	1.47173	1.68684	3.21951	1.94637	0.0001	0.000538822	yes
TJAP1	ENSG00000137221	con72	vir_par72	OK	10.4702	33.6995	1.68643	3.21859	3.99796	5e-05	0.000280515	yes
NPIPB5	ENSG00000243716	con72	vir_par72	OK	1.89574	6.09904	1.68582	3.21723	1.37335	5e-05	0.000280515	yes
STON2	ENSG00000140022	con72	vir_par72	OK	2.51739	8.0898	1.68417	3.21355	2.25203	5e-05	0.000280515	yes
ATG16L1	ENSG00000085978	con72	vir_par72	OK	10.9006	34.9844	1.6823	3.20939	4.44321	5e-05	0.000280515	yes
ORAOV1	ENSG00000149716	con72	vir_par72	OK	7.87964	25.2761	1.68157	3.20777	0.850598	0.0005	0.00237265	yes
ANGPTL4	ENSG00000167772	con72	vir_par72	OK	4.60068	14.7533	1.68112	3.20677	2.24485	5e-05	0.000280515	yes
TRIM16	ENSG00000221926	con72	vir_par72	OK	25.8983	83.041	1.68096	3.20641	3.49917	5e-05	0.000280515	yes
MEPCE	ENSG00000146834	con72	vir_par72	OK	10.6145	33.9936	1.67923	3.20257	4.12927	5e-05	0.000280515	yes
RP11-544M22.13	ENSG00000270149	con72	vir_par72	OK	13.4832	43.1726	1.67896	3.20197	1.38445	0.0013	0.00562895	yes
TUSC2	ENSG00000114383	con72	vir_par72	OK	11.1654	35.7495	1.67888	3.20179	3.0828	5e-05	0.000280515	yes
PELO	ENSG00000152684	con72	vir_par72	OK	6.09793	19.5168	1.67833	3.20057	1.66993	0.00025	0.00125904	yes
TMEM214	ENSG00000119777	con72	vir_par72	OK	31.5907	101.018	1.67704	3.19771	3.70092	5e-05	0.000280515	yes
OSR2	ENSG00000164920	con72	vir_par72	OK	0.560188	1.78946	1.67554	3.19439	1.79613	5e-05	0.000280515	yes
HM13	ENSG00000101294	con72	vir_par72	OK	108.723	347.293	1.67549	3.19428	5.30884	5e-05	0.000280515	yes
MAPK6PS4	ENSG00000215179	con72	vir_par72	OK	0.605658	1.92764	1.67026	3.18272	2.70057	5e-05	0.000280515	yes
LRIF1	ENSG00000121931	con72	vir_par72	OK	21.2959	67.7281	1.66918	3.18034	5.15218	5e-05	0.000280515	yes
RP11-24B19.3	ENSG00000270101	con72	vir_par72	OK	8.70284	27.6773	1.66915	3.18027	1.12589	0.0085	0.0296514	yes
ZNF562	ENSG00000171466	con72	vir_par72	OK	36.1824	114.821	1.66603	3.1734	2.99628	5e-05	0.000280515	yes
GNPDA1	ENSG00000113552	con72	vir_par72	OK	151.939	481.141	1.66297	3.16668	4.08115	5e-05	0.000280515	yes
VGLL3	ENSG00000206538	con72	vir_par72	OK	0.828548	2.62047	1.66117	3.16273	2.39978	5e-05	0.000280515	yes
ARID4B	ENSG00000054267	con72	vir_par72	OK	11.6431	36.8152	1.66083	3.16198	1.5944	5e-05	0.000280515	yes
RP11-849F2.8	ENSG00000269928	con72	vir_par72	OK	0.474598	1.49831	1.65855	3.15699	1.67901	0.00085	0.0038374	yes
ARFGAP1	ENSG00000101199	con72	vir_par72	OK	18.2065	57.4675	1.65829	3.15642	3.69645	5e-05	0.000280515	yes
SPIRE1	ENSG00000134278	con72	vir_par72	OK	20.0061	63.119	1.65763	3.15498	2.78015	5e-05	0.000280515	yes
AFTPH	ENSG00000119844	con72	vir_par72	OK	28.4146	89.6365	1.65745	3.15458	5.52142	5e-05	0.000280515	yes
ZCCHC12	ENSG00000174460	con72	vir_par72	OK	0.328329	1.03502	1.65645	3.1524	2.44123	5e-05	0.000280515	yes
RCE1	ENSG00000173653	con72	vir_par72	OK	10.1473	31.9464	1.65456	3.14827	2.95237	5e-05	0.000280515	yes
AC026806.2	ENSG00000268913	con72	vir_par72	OK	1.71664	5.40117	1.65369	3.14637	1.91594	5e-05	0.000280515	yes
H3F3B	ENSG00000132475	con72	vir_par72	OK	160.429	504.279	1.65229	3.14332	4.64974	5e-05	0.000280515	yes
ISL2	ENSG00000159556	con72	vir_par72	OK	1.01328	3.18332	1.6515	3.1416	2.77181	5e-05	0.000280515	yes
MBD2	ENSG00000134046	con72	vir_par72	OK	20.7316	65.0433	1.64957	3.1374	3.21954	5e-05	0.000280515	yes
MIR31HG	ENSG00000171889	con72	vir_par72	OK	0.567597	1.77922	1.64831	3.13466	1.93319	5e-05	0.000280515	yes
BTBD10	ENSG00000148925	con72	vir_par72	OK	16.4186	51.4509	1.64787	3.13371	4.99119	5e-05	0.000280515	yes
RP11-345L23.1	ENSG00000235899	con72	vir_par72	OK	0.622222	1.94909	1.6473	3.13247	1.70344	0.00025	0.00125904	yes
UGCG	ENSG00000148154	con72	vir_par72	OK	32.331	101.246	1.64688	3.13156	5.51449	5e-05	0.000280515	yes
THAP9-AS1	ENSG00000251022	con72	vir_par72	OK	73.8083	230.692	1.64412	3.12557	2.76521	5e-05	0.000280515	yes
SSH1	ENSG00000084112	con72	vir_par72	OK	6.66161	20.8185	1.64392	3.12514	4.25207	5e-05	0.000280515	yes
KEAP1	ENSG00000079999	con72	vir_par72	OK	14.7664	46.1437	1.64382	3.12492	3.4051	5e-05	0.000280515	yes
MAP7D1	ENSG00000116871	con72	vir_par72	OK	10.3035	32.1947	1.64369	3.12464	2.49779	5e-05	0.000280515	yes
CEBPB	ENSG00000172216	con72	vir_par72	OK	17.1528	53.594	1.64363	3.12451	4.997	5e-05	0.000280515	yes
IGHMBP2	ENSG00000132740	con72	vir_par72	OK	3.78658	11.8133	1.64144	3.11977	1.98888	5e-05	0.000280515	yes
FOCAD	ENSG00000188352	con72	vir_par72	OK	41.0856	128.017	1.63962	3.11584	2.90985	5e-05	0.000280515	yes
TSKU	ENSG00000182704	con72	vir_par72	OK	12.979	40.4353	1.63943	3.11543	4.87135	5e-05	0.000280515	yes
RP11-325P15.1	ENSG00000225603	con72	vir_par72	OK	0.832727	2.59351	1.63899	3.11448	1.88019	5e-05	0.000280515	yes
NANOS1	ENSG00000188613	con72	vir_par72	OK	2.4054	7.49067	1.63882	3.11411	2.67193	5e-05	0.000280515	yes
KIAA1551	ENSG00000174718	con72	vir_par72	OK	31.7278	98.7411	1.6379	3.11212	2.01439	5e-05	0.000280515	yes
NPIPB11	ENSG00000254206	con72	vir_par72	OK	0.647235	2.01362	1.63743	3.11111	1.90325	0.00015	0.000786087	yes
FGF19	ENSG00000162344	con72	vir_par72	OK	2.83474	8.8183	1.63729	3.11081	3.72515	5e-05	0.000280515	yes
NUS1	ENSG00000153989	con72	vir_par72	OK	13.1507	40.9032	1.63707	3.11034	5.3121	5e-05	0.000280515	yes
C4orf32	ENSG00000174749	con72	vir_par72	OK	2.18612	6.78736	1.63448	3.10476	4.35897	5e-05	0.000280515	yes
ZKSCAN5	ENSG00000196652	con72	vir_par72	OK	6.37995	19.7857	1.63284	3.10123	5.04239	5e-05	0.000280515	yes
EREG	ENSG00000124882	con72	vir_par72	OK	65.8546	204.156	1.63232	3.10011	5.2963	5e-05	0.000280515	yes
TARSL2	ENSG00000185418	con72	vir_par72	OK	4.41107	13.667	1.6315	3.09835	3.69283	5e-05	0.000280515	yes
TJP1	ENSG00000104067	con72	vir_par72	OK	52.6963	163.264	1.63143	3.0982	3.13023	5e-05	0.000280515	yes
SOX30	ENSG00000039600	con72	vir_par72	OK	0.466974	1.44628	1.63093	3.09713	2.34704	5e-05	0.000280515	yes
LEF1	ENSG00000138795	con72	vir_par72	OK	0.469033	1.45111	1.62939	3.09382	1.14315	5e-05	0.000280515	yes
HSPH1	ENSG00000120694	con72	vir_par72	OK	58.6402	181.305	1.62846	3.09183	4.18582	5e-05	0.000280515	yes
SERTAD3	ENSG00000167565	con72	vir_par72	OK	18.4399	56.9444	1.62672	3.0881	4.31769	5e-05	0.000280515	yes
ZSCAN22	ENSG00000182318	con72	vir_par72	OK	2.27111	7.00948	1.62591	3.08637	4.09563	5e-05	0.000280515	yes
ITSN1	ENSG00000205726	con72	vir_par72	OK	12.6612	39.0523	1.62499	3.0844	0.60163	0.0002	0.00102556	yes
STARD3NL	ENSG00000010270	con72	vir_par72	OK	57.1297	176.132	1.62434	3.08301	5.3889	5e-05	0.000280515	yes
SYNJ1	ENSG00000159082	con72	vir_par72	OK	3.40561	10.4994	1.62431	3.08295	3.26732	5e-05	0.000280515	yes
LRRC37BP1	ENSG00000250462	con72	vir_par72	OK	4.09248	12.6168	1.6243	3.08293	2.14711	5e-05	0.000280515	yes
C18orf8	ENSG00000141452	con72	vir_par72	OK	9.21397	28.3941	1.6237	3.08164	1.41958	5e-05	0.000280515	yes
DCP1A	ENSG00000162290	con72	vir_par72	OK	18.9661	58.4346	1.6234	3.081	4.24579	5e-05	0.000280515	yes
UTP6	ENSG00000108651	con72	vir_par72	OK	34.7273	106.608	1.61818	3.06988	3.82416	5e-05	0.000280515	yes
PDGFA	ENSG00000197461	con72	vir_par72	OK	4.8269	14.8121	1.61761	3.06866	3.91514	5e-05	0.000280515	yes
DDX58	ENSG00000107201	con72	vir_par72	OK	3.96867	12.1767	1.6174	3.06822	4.25831	5e-05	0.000280515	yes
BTAF1	ENSG00000095564	con72	vir_par72	OK	24.7331	75.7854	1.61548	3.06414	4.4564	5e-05	0.000280515	yes
IRF6	ENSG00000117595	con72	vir_par72	OK	29.7432	91.0547	1.61417	3.06135	5.31352	5e-05	0.000280515	yes
MITF	ENSG00000187098	con72	vir_par72	OK	3.36014	10.2731	1.61228	3.05735	2.64353	5e-05	0.000280515	yes
GRWD1	ENSG00000105447	con72	vir_par72	OK	8.0753	24.6871	1.61217	3.05711	2.48594	5e-05	0.000280515	yes
ZCCHC24	ENSG00000165424	con72	vir_par72	OK	2.25636	6.8936	1.61126	3.05519	4.01107	5e-05	0.000280515	yes
MRGBP	ENSG00000101189	con72	vir_par72	OK	10.6011	32.3843	1.61108	3.0548	4.63819	5e-05	0.000280515	yes
NUDT17	ENSG00000186364	con72	vir_par72	OK	1.22374	3.73814	1.61102	3.05468	0.993702	0.0081	0.0284395	yes
NUP214	ENSG00000126883	con72	vir_par72	OK	10.7919	32.9596	1.61074	3.05408	2.33041	5e-05	0.000280515	yes
RLF	ENSG00000117000	con72	vir_par72	OK	12.4894	38.1071	1.60936	3.05116	5.43752	5e-05	0.000280515	yes
IGFBP3	ENSG00000146674	con72	vir_par72	OK	0.60706	1.85136	1.60868	3.04973	1.92874	5e-05	0.000280515	yes
RP11-347C12.1	ENSG00000198064	con72	vir_par72	OK	0.791411	2.41339	1.60856	3.04947	2.27752	5e-05	0.000280515	yes
NFRKB	ENSG00000170322	con72	vir_par72	OK	17.9895	54.854	1.60844	3.04922	3.22117	5e-05	0.000280515	yes
SEC23IP	ENSG00000107651	con72	vir_par72	OK	38.3231	116.66	1.60603	3.04413	2.94907	5e-05	0.000280515	yes
PMAIP1	ENSG00000141682	con72	vir_par72	OK	24.8267	75.4775	1.60415	3.04017	4.98429	5e-05	0.000280515	yes
DENND4A	ENSG00000174485	con72	vir_par72	OK	7.82107	23.7604	1.60312	3.038	1.7815	5e-05	0.000280515	yes
SRP72	ENSG00000174780	con72	vir_par72	OK	118.664	360.298	1.6023	3.03627	4.32801	5e-05	0.000280515	yes
CBWD2	ENSG00000136682	con72	vir_par72	OK	10.8612	32.9714	1.60204	3.03572	3.03097	5e-05	0.000280515	yes
SURF4	ENSG00000148248	con72	vir_par72	OK	95.4954	289.849	1.6018	3.03522	4.15818	5e-05	0.000280515	yes
PDIA4	ENSG00000155660	con72	vir_par72	OK	110.417	335.117	1.6017	3.03501	5.34504	5e-05	0.000280515	yes
RIOK1	ENSG00000124784	con72	vir_par72	OK	14.6735	44.4978	1.60052	3.03253	1.62133	0.0004	0.00193713	yes
SIPA1L2	ENSG00000116991	con72	vir_par72	OK	1.24396	3.76972	1.59952	3.03042	2.0106	5e-05	0.000280515	yes
KDM4C	ENSG00000107077	con72	vir_par72	OK	12.7735	38.6792	1.59841	3.02809	3.02186	5e-05	0.000280515	yes
PIKFYVE	ENSG00000115020	con72	vir_par72	OK	10.6829	32.3391	1.59797	3.02717	4.47099	5e-05	0.000280515	yes
BTRC	ENSG00000166167	con72	vir_par72	OK	17.733	53.6759	1.59784	3.0269	2.4582	5e-05	0.000280515	yes
RP11-804H8.6	ENSG00000273356	con72	vir_par72	OK	1.45288	4.3975	1.59777	3.02675	2.29917	5e-05	0.000280515	yes
MX1	ENSG00000157601	con72	vir_par72	OK	3.26854	9.8876	1.59697	3.02507	2.56291	5e-05	0.000280515	yes
PLAU	ENSG00000122861	con72	vir_par72	OK	1.97471	5.96539	1.59498	3.0209	2.55544	5e-05	0.000280515	yes
MRPS31P5	ENSG00000243406	con72	vir_par72	OK	4.5353	13.6957	1.59446	3.01981	2.18305	5e-05	0.000280515	yes
LUZP1	ENSG00000169641	con72	vir_par72	OK	11.3864	34.3791	1.59422	3.01931	2.8632	5e-05	0.000280515	yes
ZNF281	ENSG00000162702	con72	vir_par72	OK	10.5444	31.8325	1.59402	3.01889	5.20379	5e-05	0.000280515	yes
SRF	ENSG00000112658	con72	vir_par72	OK	10.1866	30.676	1.59044	3.01141	5.06236	5e-05	0.000280515	yes
BLOC1S3	ENSG00000189114	con72	vir_par72	OK	6.00742	18.0869	1.59013	3.01076	2.19555	5e-05	0.000280515	yes
NAT9	ENSG00000109065	con72	vir_par72	OK	42.6933	128.535	1.59009	3.01068	3.89245	5e-05	0.000280515	yes
ARAP2	ENSG00000047365	con72	vir_par72	OK	4.70543	14.1659	1.59002	3.01054	2.04451	5e-05	0.000280515	yes
INO80	ENSG00000128908	con72	vir_par72	OK	11.8286	35.6103	1.59001	3.01051	2.84612	5e-05	0.000280515	yes
FNIP1	ENSG00000217128	con72	vir_par72	OK	15.3783	46.2542	1.58869	3.00776	4.20003	5e-05	0.000280515	yes
TEF	ENSG00000167074	con72	vir_par72	OK	10.9187	32.8196	1.58776	3.00582	5.08139	5e-05	0.000280515	yes
DCUN1D5	ENSG00000137692	con72	vir_par72	OK	37.6784	113.179	1.58679	3.0038	4.25745	5e-05	0.000280515	yes
EFNA1	ENSG00000169242	con72	vir_par72	OK	19.1184	57.3539	1.58493	2.99993	3.98391	5e-05	0.000280515	yes
RP11-7K24.3	ENSG00000261068	con72	vir_par72	OK	3.0275	9.07402	1.58362	2.99721	3.60539	5e-05	0.000280515	yes
RNMT	ENSG00000101654	con72	vir_par72	OK	29.8176	89.3669	1.58358	2.99713	3.21079	5e-05	0.000280515	yes
SRPRB	ENSG00000144867	con72	vir_par72	OK	59.9967	179.789	1.58335	2.99665	4.48175	5e-05	0.000280515	yes
SETX	ENSG00000107290	con72	vir_par72	OK	15.8022	47.3437	1.58305	2.99603	4.11426	5e-05	0.000280515	yes
YKT6	ENSG00000106636	con72	vir_par72	OK	45.8968	137.479	1.58274	2.99538	4.38452	5e-05	0.000280515	yes
ZNF35	ENSG00000169981	con72	vir_par72	OK	9.84151	29.4788	1.58273	2.99536	2.02098	5e-05	0.000280515	yes
SIRT1	ENSG00000096717	con72	vir_par72	OK	23.5169	70.4115	1.58211	2.99407	4.87321	5e-05	0.000280515	yes
PRPF38AP2	ENSG00000236582	con72	vir_par72	OK	2.90898	8.7015	1.58075	2.99125	2.96588	5e-05	0.000280515	yes
CKAP4	ENSG00000136026	con72	vir_par72	OK	24.3089	72.6833	1.58014	2.98999	4.92331	5e-05	0.000280515	yes
OSBP	ENSG00000110048	con72	vir_par72	OK	42.967	128.145	1.57647	2.98239	4.76112	5e-05	0.000280515	yes
UBN1	ENSG00000118900	con72	vir_par72	OK	13.328	39.7401	1.57613	2.98169	2.89626	5e-05	0.000280515	yes
EPT1	ENSG00000138018	con72	vir_par72	OK	40.5911	121.024	1.57606	2.98154	3.25352	5e-05	0.000280515	yes
RP11-645C24.5	ENSG00000260306	con72	vir_par72	OK	0.573085	1.70816	1.57563	2.98066	2.22035	5e-05	0.000280515	yes
PPARD	ENSG00000112033	con72	vir_par72	OK	6.36326	18.9614	1.57523	2.97983	4.41146	5e-05	0.000280515	yes
ATP2A2	ENSG00000174437	con72	vir_par72	OK	90.952	270.993	1.57508	2.97952	4.6735	5e-05	0.000280515	yes
ZNF850	ENSG00000267041	con72	vir_par72	OK	12.5149	37.2814	1.57481	2.97896	1.69561	0.0001	0.000538822	yes
PLAGL2	ENSG00000126003	con72	vir_par72	OK	10.6663	31.7507	1.57373	2.97673	5.16142	5e-05	0.000280515	yes
CYTH3	ENSG00000008256	con72	vir_par72	OK	7.06544	21.0206	1.57296	2.97515	4.05936	5e-05	0.000280515	yes
CCDC149	ENSG00000181982	con72	vir_par72	OK	3.9602	11.7704	1.57152	2.97218	3.40024	5e-05	0.000280515	yes
BTG1	ENSG00000133639	con72	vir_par72	OK	38.7308	115.028	1.57043	2.96993	5.34325	5e-05	0.000280515	yes
ELL2P1	ENSG00000227295	con72	vir_par72	OK	1.22429	3.6357	1.57029	2.96964	2.92127	5e-05	0.000280515	yes
LRRC59	ENSG00000108829	con72	vir_par72	OK	94.6963	280.865	1.56849	2.96594	5.44164	5e-05	0.000280515	yes
FAF2	ENSG00000113194	con72	vir_par72	OK	42.9556	127.352	1.56791	2.96475	5.24356	5e-05	0.000280515	yes
RP11-231C14.4	ENSG00000169203	con72	vir_par72	OK	1.16445	3.45223	1.56788	2.96469	1.83454	5e-05	0.000280515	yes
PNO1	ENSG00000115946	con72	vir_par72	OK	21.1685	62.7478	1.56765	2.96421	2.75374	5e-05	0.000280515	yes
HSP90AA6P	ENSG00000181359	con72	vir_par72	OK	2.39465	7.09685	1.56736	2.96362	2.62192	5e-05	0.000280515	yes
GZF1	ENSG00000125812	con72	vir_par72	OK	7.18064	21.2717	1.56675	2.96237	4.19083	5e-05	0.000280515	yes
ZNF416	ENSG00000083817	con72	vir_par72	OK	5.41315	16.035	1.56668	2.96222	4.20321	5e-05	0.000280515	yes
HLA-V	ENSG00000181126	con72	vir_par72	OK	0.435492	1.28992	1.56656	2.96198	1.69213	5e-05	0.000280515	yes
CBWD5	ENSG00000147996	con72	vir_par72	OK	29.0792	86.1043	1.5661	2.96103	3.94459	5e-05	0.000280515	yes
C2orf42	ENSG00000115998	con72	vir_par72	OK	14.1611	41.8864	1.56455	2.95785	1.65361	5e-05	0.000280515	yes
MBNL2	ENSG00000139793	con72	vir_par72	OK	84.8072	250.809	1.56433	2.9574	4.12072	5e-05	0.000280515	yes
RNF166	ENSG00000158717	con72	vir_par72	OK	1.80803	5.34646	1.56416	2.95705	2.41267	5e-05	0.000280515	yes
GRPEL1	ENSG00000109519	con72	vir_par72	OK	37.6487	111.29	1.56365	2.95601	4.54256	5e-05	0.000280515	yes
RNF25	ENSG00000163481	con72	vir_par72	OK	19.8348	58.6211	1.56339	2.95547	2.92744	5e-05	0.000280515	yes
RELA	ENSG00000173039	con72	vir_par72	OK	16.5271	48.8399	1.56323	2.95515	3.79666	5e-05	0.000280515	yes
URB2	ENSG00000135763	con72	vir_par72	OK	5.32527	15.6982	1.55967	2.94786	4.20637	5e-05	0.000280515	yes
SPAG1	ENSG00000104450	con72	vir_par72	OK	3.56318	10.4975	1.5588	2.94609	2.28527	5e-05	0.000280515	yes
SRRD	ENSG00000100104	con72	vir_par72	OK	14.3756	42.3418	1.55846	2.94539	2.05229	5e-05	0.000280515	yes
ZFAND5	ENSG00000107372	con72	vir_par72	OK	38.529	113.403	1.55744	2.94331	5.06144	5e-05	0.000280515	yes
RASAL2	ENSG00000075391	con72	vir_par72	OK	4.12454	12.1339	1.55674	2.94188	1.43027	0.00025	0.00125904	yes
LAMA3	ENSG00000053747	con72	vir_par72	OK	4.75404	13.9624	1.55432	2.93695	2.71278	5e-05	0.000280515	yes
TOPORS	ENSG00000197579	con72	vir_par72	OK	8.82183	25.8583	1.55148	2.93118	3.76368	5e-05	0.000280515	yes
ARFGAP3	ENSG00000242247	con72	vir_par72	OK	26.4513	77.4594	1.5501	2.92837	2.41992	5e-05	0.000280515	yes
ELL	ENSG00000105656	con72	vir_par72	OK	3.51163	10.2827	1.55	2.92817	2.90407	5e-05	0.000280515	yes
CXorf40B	ENSG00000197021	con72	vir_par72	OK	6.0573	17.729	1.54937	2.92689	2.77194	5e-05	0.000280515	yes
CTNNAL1	ENSG00000119326	con72	vir_par72	OK	53.1949	155.492	1.54748	2.92306	4.91998	5e-05	0.000280515	yes
COLQ	ENSG00000206561	con72	vir_par72	OK	0.674362	1.97085	1.54722	2.92253	0.397391	0.0125	0.0413502	yes
LRP12	ENSG00000147650	con72	vir_par72	OK	17.3714	50.7652	1.54712	2.92233	3.77778	5e-05	0.000280515	yes
DHX34	ENSG00000134815	con72	vir_par72	OK	2.72011	7.94429	1.54625	2.92057	3.72251	5e-05	0.000280515	yes
THBS1	ENSG00000137801	con72	vir_par72	OK	42.5145	124.002	1.54433	2.91669	3.31642	5e-05	0.000280515	yes
RIC8B	ENSG00000111785	con72	vir_par72	OK	5.7595	16.7828	1.54297	2.91394	2.62163	5e-05	0.000280515	yes
GSR	ENSG00000104687	con72	vir_par72	OK	92.7953	270.263	1.54224	2.91246	5.36342	5e-05	0.000280515	yes
FTH1P16	ENSG00000227376	con72	vir_par72	OK	30.4323	88.6319	1.54222	2.91242	1.42228	0.0011	0.00484329	yes
KCTD21	ENSG00000188997	con72	vir_par72	OK	4.21087	12.2526	1.5409	2.90976	2.05832	5e-05	0.000280515	yes
MVD	ENSG00000167508	con72	vir_par72	OK	19.9992	58.1827	1.54065	2.90926	2.99025	5e-05	0.000280515	yes
EIF1AD	ENSG00000175376	con72	vir_par72	OK	18.653	54.2574	1.54041	2.90877	2.80999	5e-05	0.000280515	yes
RP11-465B22.3	ENSG00000217801	con72	vir_par72	OK	12.6876	36.8881	1.53973	2.9074	3.22021	5e-05	0.000280515	yes
RNF122	ENSG00000133874	con72	vir_par72	OK	2.03075	5.9025	1.53932	2.90657	3.12251	5e-05	0.000280515	yes
ZBTB11	ENSG00000066422	con72	vir_par72	OK	11.7328	34.0903	1.53881	2.90555	4.62999	5e-05	0.000280515	yes
SLC25A28	ENSG00000155287	con72	vir_par72	OK	10.9911	31.8968	1.53708	2.90207	3.41629	5e-05	0.000280515	yes
ZNF286A	ENSG00000187607	con72	vir_par72	OK	8.99123	26.0773	1.5362	2.9003	2.13898	5e-05	0.000280515	yes
KARS	ENSG00000065427	con72	vir_par72	OK	114.075	330.807	1.536	2.89989	4.51735	5e-05	0.000280515	yes
RAB24	ENSG00000169228	con72	vir_par72	OK	5.72696	16.6052	1.53579	2.89947	2.47422	5e-05	0.000280515	yes
MIR4458HG	ENSG00000247516	con72	vir_par72	OK	11.5707	33.5369	1.53528	2.89845	3.6465	5e-05	0.000280515	yes
LMO7	ENSG00000136153	con72	vir_par72	OK	47.5932	137.943	1.53525	2.89839	2.65237	5e-05	0.000280515	yes
SIN3B	ENSG00000127511	con72	vir_par72	OK	7.7879	22.5686	1.53501	2.8979	2.61652	5e-05	0.000280515	yes
DMRTA2	ENSG00000142700	con72	vir_par72	OK	0.781171	2.26355	1.53488	2.89764	2.71799	5e-05	0.000280515	yes
ZCCHC6	ENSG00000083223	con72	vir_par72	OK	8.69639	25.1955	1.53468	2.89724	3.5477	5e-05	0.000280515	yes
AARSD1	ENSG00000266967	con72	vir_par72	OK	27.2429	78.8998	1.53414	2.89616	3.53778	5e-05	0.000280515	yes
TSSC1	ENSG00000032389	con72	vir_par72	OK	9.85542	28.5017	1.53206	2.89198	3.48519	5e-05	0.000280515	yes
PDXP	ENSG00000241360	con72	vir_par72	OK	4.24166	12.2543	1.53058	2.88902	1.77956	0.0003	0.00148912	yes
RRP12	ENSG00000052749	con72	vir_par72	OK	11.3088	32.6656	1.53033	2.88852	4.46171	5e-05	0.000280515	yes
BAG3	ENSG00000151929	con72	vir_par72	OK	9.49831	27.431	1.53007	2.888	4.50615	5e-05	0.000280515	yes
BTG3	ENSG00000154640	con72	vir_par72	OK	23.3785	67.3298	1.52606	2.87998	4.28172	5e-05	0.000280515	yes
ATAD2B	ENSG00000119778	con72	vir_par72	OK	3.50917	10.0927	1.52411	2.87609	2.35828	5e-05	0.000280515	yes
MED15	ENSG00000099917	con72	vir_par72	OK	12.4996	35.9455	1.52393	2.87573	2.62482	5e-05	0.000280515	yes
SRSF3	ENSG00000112081	con72	vir_par72	OK	250.399	719.529	1.52282	2.87352	4.50037	5e-05	0.000280515	yes
AC005562.1	ENSG00000214719	con72	vir_par72	OK	5.96504	17.1314	1.52204	2.87197	2.30749	5e-05	0.000280515	yes
CRY2	ENSG00000121671	con72	vir_par72	OK	6.77793	19.4656	1.52201	2.87191	3.25671	5e-05	0.000280515	yes
PALLD	ENSG00000129116	con72	vir_par72	OK	11.9004	34.157	1.52117	2.87024	3.05471	5e-05	0.000280515	yes
RPN1	ENSG00000163902	con72	vir_par72	OK	123.705	354.993	1.52088	2.86966	5.19574	5e-05	0.000280515	yes
CRK	ENSG00000167193	con72	vir_par72	OK	52.3041	150.052	1.52047	2.86884	5.30942	5e-05	0.000280515	yes
ADAM19	ENSG00000135074	con72	vir_par72	OK	0.892008	2.55759	1.51966	2.86723	1.89232	0.0001	0.000538822	yes
BIRC2	ENSG00000110330	con72	vir_par72	OK	29.8529	85.5824	1.51944	2.8668	4.42745	5e-05	0.000280515	yes
UBR4	ENSG00000127481	con72	vir_par72	OK	21.3367	61.0687	1.51709	2.86213	1.92104	5e-05	0.000280515	yes
CTD-2267D19.6	ENSG00000270145	con72	vir_par72	OK	0.717004	2.051	1.51628	2.86053	2.19491	5e-05	0.000280515	yes
SGMS2	ENSG00000164023	con72	vir_par72	OK	21.6441	61.9073	1.51613	2.86023	3.39064	5e-05	0.000280515	yes
SLC43A3	ENSG00000134802	con72	vir_par72	OK	0.478493	1.36834	1.51585	2.85967	0.779589	5e-05	0.000280515	yes
CCNL1	ENSG00000163660	con72	vir_par72	OK	30.7718	87.8574	1.51356	2.85514	3.72768	5e-05	0.000280515	yes
BNIP1	ENSG00000113734	con72	vir_par72	OK	33.155	94.6522	1.51341	2.85484	4.55227	5e-05	0.000280515	yes
BRPF1	ENSG00000156983	con72	vir_par72	OK	3.77633	10.7642	1.51119	2.85045	2.83653	5e-05	0.000280515	yes
MAPK6	ENSG00000069956	con72	vir_par72	OK	59.8327	170.503	1.51079	2.84966	2.54823	5e-05	0.000280515	yes
ATP8B3	ENSG00000130270	con72	vir_par72	OK	1.46346	4.16939	1.51045	2.84899	2.4373	5e-05	0.000280515	yes
C14orf28	ENSG00000179476	con72	vir_par72	OK	2.31897	6.6054	1.51016	2.84842	2.75529	5e-05	0.000280515	yes
DDX19A	ENSG00000168872	con72	vir_par72	OK	12.0661	34.3533	1.50949	2.84709	2.03608	5e-05	0.000280515	yes
ASB6	ENSG00000148331	con72	vir_par72	OK	3.03656	8.63717	1.50812	2.84439	3.43459	5e-05	0.000280515	yes
MTUS1	ENSG00000129422	con72	vir_par72	OK	13.0616	37.1303	1.50726	2.8427	3.32447	5e-05	0.000280515	yes
THAP1	ENSG00000131931	con72	vir_par72	OK	16.464	46.7996	1.50718	2.84254	4.50013	5e-05	0.000280515	yes
HDLBP	ENSG00000115677	con72	vir_par72	OK	273.824	778.163	1.50682	2.84183	1.70908	5e-05	0.000280515	yes
PQLC2	ENSG00000040487	con72	vir_par72	OK	2.00326	5.69139	1.50643	2.84106	2.60905	5e-05	0.000280515	yes
SAP30BP	ENSG00000161526	con72	vir_par72	OK	42.6938	121.244	1.50582	2.83986	3.35378	5e-05	0.000280515	yes
NOL6	ENSG00000165271	con72	vir_par72	OK	8.68985	24.6776	1.5058	2.83982	3.88924	5e-05	0.000280515	yes
ESYT3	ENSG00000158220	con72	vir_par72	OK	2.29877	6.52488	1.50509	2.83842	2.0336	5e-05	0.000280515	yes
RUNX1	ENSG00000159216	con72	vir_par72	OK	9.19333	26.067	1.50356	2.83542	4.09853	5e-05	0.000280515	yes
NUMBL	ENSG00000105245	con72	vir_par72	OK	3.73549	10.5851	1.50266	2.83365	3.39077	5e-05	0.000280515	yes
TMF1	ENSG00000144747	con72	vir_par72	OK	16.7314	47.3815	1.50176	2.83188	3.15441	5e-05	0.000280515	yes
TNFRSF10B	ENSG00000120889	con72	vir_par72	OK	128.059	362.503	1.50118	2.83074	4.38835	5e-05	0.000280515	yes
DNAJC27	ENSG00000115137	con72	vir_par72	OK	3.92353	11.0875	1.4987	2.82588	2.58004	5e-05	0.000280515	yes
UVRAG	ENSG00000198382	con72	vir_par72	OK	14.0406	39.619	1.49659	2.82175	3.02093	5e-05	0.000280515	yes
ABCC1	ENSG00000103222	con72	vir_par72	OK	15.2601	43.0517	1.4963	2.82118	3.37426	5e-05	0.000280515	yes
PPRC1	ENSG00000148840	con72	vir_par72	OK	13.1287	37.0368	1.49623	2.82105	3.25322	5e-05	0.000280515	yes
ADAM32	ENSG00000197140	con72	vir_par72	OK	0.935269	2.63598	1.49489	2.81843	1.78854	5e-05	0.000280515	yes
TVP23C,TVP23C-CDRT4	ENSG00000175106	con72	vir_par72	OK	4.62575	13.0326	1.49437	2.81741	1.328	0.00255	0.0102846	yes
TMEM189	ENSG00000240849	con72	vir_par72	OK	8.28331	23.3103	1.49269	2.81413	1.39478	0.00595	0.021734	yes
CCDC117	ENSG00000159873	con72	vir_par72	OK	17.4165	48.9572	1.49106	2.81095	4.71885	5e-05	0.000280515	yes
NT5C2	ENSG00000076685	con72	vir_par72	OK	269.154	756.48	1.49087	2.81058	1.80112	5e-05	0.000280515	yes
CTB-50E14.5	ENSG00000269374	con72	vir_par72	OK	29.5325	82.9903	1.49064	2.81014	3.42592	5e-05	0.000280515	yes
ZNF555	ENSG00000186300	con72	vir_par72	OK	4.63473	13.0237	1.49058	2.81002	3.17526	5e-05	0.000280515	yes
RNF19B	ENSG00000116514	con72	vir_par72	OK	13.4101	37.6373	1.48884	2.80663	4.6649	5e-05	0.000280515	yes
RIPK1	ENSG00000137275	con72	vir_par72	OK	9.03923	25.3524	1.48785	2.80471	4.63685	5e-05	0.000280515	yes
RIT1	ENSG00000143622	con72	vir_par72	OK	15.6249	43.7782	1.48636	2.80181	4.17159	5e-05	0.000280515	yes
KCMF1	ENSG00000176407	con72	vir_par72	OK	59.6556	167.122	1.48617	2.80144	3.12531	5e-05	0.000280515	yes
PTRF	ENSG00000177469	con72	vir_par72	OK	8.62779	24.163	1.48574	2.80061	4.66382	5e-05	0.000280515	yes
SH3BP4	ENSG00000130147	con72	vir_par72	OK	33.0769	92.606	1.48528	2.79972	5.12388	5e-05	0.000280515	yes
MDN1	ENSG00000112159	con72	vir_par72	OK	5.54973	15.537	1.48522	2.7996	2.44076	5e-05	0.000280515	yes
FBXW7	ENSG00000109670	con72	vir_par72	OK	16.385	45.8387	1.48419	2.7976	3.43949	5e-05	0.000280515	yes
FAM118A	ENSG00000100376	con72	vir_par72	OK	9.48589	26.5373	1.48416	2.79754	2.92366	5e-05	0.000280515	yes
TRAPPC10	ENSG00000160218	con72	vir_par72	OK	11.8128	33.0411	1.48391	2.79706	2.89787	5e-05	0.000280515	yes
ATF7IP2	ENSG00000166669	con72	vir_par72	OK	16.2955	45.5434	1.48277	2.79485	2.48327	5e-05	0.000280515	yes
ZNF844	ENSG00000223547	con72	vir_par72	OK	0.802091	2.24171	1.48276	2.79483	2.42851	5e-05	0.000280515	yes
TOLLIP	ENSG00000078902	con72	vir_par72	OK	8.20073	22.9171	1.4826	2.79452	4.1967	5e-05	0.000280515	yes
UBR5	ENSG00000104517	con72	vir_par72	OK	17.9963	50.2454	1.48129	2.79198	1.97673	5e-05	0.000280515	yes
NET1	ENSG00000173848	con72	vir_par72	OK	65.0182	181.418	1.4804	2.79026	3.43388	5e-05	0.000280515	yes
LIN37	ENSG00000267796	con72	vir_par72	OK	15.0662	41.97	1.47805	2.78572	2.10195	5e-05	0.000280515	yes
LRP5L	ENSG00000100068	con72	vir_par72	OK	1.47534	4.10926	1.47784	2.78531	2.32352	5e-05	0.000280515	yes
LONRF1	ENSG00000154359	con72	vir_par72	OK	18.0586	50.2657	1.47689	2.78348	3.44719	5e-05	0.000280515	yes
RP11-678B3.2	ENSG00000235454	con72	vir_par72	OK	0.446109	1.24119	1.47626	2.78227	1.78347	5e-05	0.000280515	yes
SEC16A	ENSG00000148396	con72	vir_par72	OK	17.5585	48.8411	1.47593	2.78163	2.88094	5e-05	0.000280515	yes
TNFRSF10D	ENSG00000173530	con72	vir_par72	OK	24.4772	68.0368	1.47488	2.77961	5.06123	5e-05	0.000280515	yes
PSMD3	ENSG00000108344	con72	vir_par72	OK	30.0655	83.5441	1.47443	2.77874	4.51981	5e-05	0.000280515	yes
PDHX	ENSG00000110435	con72	vir_par72	OK	21.3146	59.1886	1.47347	2.77689	3.67539	5e-05	0.000280515	yes
KCTD2	ENSG00000180901	con72	vir_par72	OK	10.012	27.7992	1.47331	2.77658	2.41589	5e-05	0.000280515	yes
ERLEC1	ENSG00000068912	con72	vir_par72	OK	48.1209	133.559	1.47274	2.77549	4.27816	5e-05	0.000280515	yes
NOL10	ENSG00000115761	con72	vir_par72	OK	20.4904	56.8543	1.47232	2.77468	4.04525	5e-05	0.000280515	yes
LETM2	ENSG00000165046	con72	vir_par72	OK	1.70992	4.74123	1.47133	2.77277	1.73485	5e-05	0.000280515	yes
TRIP11	ENSG00000100815	con72	vir_par72	OK	11.6922	32.3755	1.46936	2.76899	4.62049	5e-05	0.000280515	yes
MPHOSPH10	ENSG00000124383	con72	vir_par72	OK	14.6489	40.5218	1.46791	2.76621	4.38135	5e-05	0.000280515	yes
RIOK3	ENSG00000101782	con72	vir_par72	OK	63.1566	174.659	1.46753	2.76548	4.27786	5e-05	0.000280515	yes
CAPN10-AS1	ENSG00000260942	con72	vir_par72	OK	0.575001	1.59009	1.46748	2.76538	2.71938	5e-05	0.000280515	yes
WDR37	ENSG00000047056	con72	vir_par72	OK	3.83748	10.609	1.46706	2.76458	3.65644	5e-05	0.000280515	yes
MTHFD2P7	ENSG00000181260	con72	vir_par72	OK	22.8726	63.2078	1.46648	2.76347	4.13199	5e-05	0.000280515	yes
LRIG2	ENSG00000198799	con72	vir_par72	OK	10.6731	29.4875	1.46613	2.7628	2.63813	5e-05	0.000280515	yes
PELI1	ENSG00000197329	con72	vir_par72	OK	29.967	82.7435	1.46527	2.76115	4.89509	5e-05	0.000280515	yes
CDR2L	ENSG00000109089	con72	vir_par72	OK	3.75296	10.3524	1.46386	2.75845	3.78308	5e-05	0.000280515	yes
RAB11FIP5	ENSG00000135631	con72	vir_par72	OK	6.43739	17.7481	1.46312	2.75704	2.31245	5e-05	0.000280515	yes
DYNC1H1	ENSG00000197102	con72	vir_par72	OK	22.0746	60.8595	1.46309	2.75698	1.59914	5e-05	0.000280515	yes
ORMDL2	ENSG00000123353	con72	vir_par72	OK	40.8266	112.487	1.46218	2.75524	2.22603	5e-05	0.000280515	yes
ETF1P2	ENSG00000240132	con72	vir_par72	OK	1.53688	4.23424	1.4621	2.75509	1.40756	0.00305	0.0120459	yes
PVR	ENSG00000073008	con72	vir_par72	OK	16.2729	44.8225	1.46175	2.75442	3.6963	5e-05	0.000280515	yes
ICA1	ENSG00000003147	con72	vir_par72	OK	70.2519	193.293	1.46018	2.75143	3.65237	5e-05	0.000280515	yes
GMEB2	ENSG00000101216	con72	vir_par72	OK	2.46272	6.77451	1.45986	2.75082	3.53956	5e-05	0.000280515	yes
P4HB	ENSG00000185624	con72	vir_par72	OK	247.998	681.584	1.45856	2.74834	2.72979	5e-05	0.000280515	yes
TMCO3	ENSG00000150403	con72	vir_par72	OK	136.16	374.04	1.45789	2.74706	3.81136	5e-05	0.000280515	yes
PINX1	ENSG00000254093	con72	vir_par72	OK	18.7682	51.5484	1.45764	2.74659	3.28817	5e-05	0.000280515	yes
MBP	ENSG00000197971	con72	vir_par72	OK	22.507	61.8065	1.45738	2.74609	4.73243	5e-05	0.000280515	yes
CTA-217C2.1	ENSG00000226328	con72	vir_par72	OK	14.9466	41.0011	1.45584	2.74316	3.42554	5e-05	0.000280515	yes
SEC24A	ENSG00000113615	con72	vir_par72	OK	17.9709	49.2875	1.45556	2.74263	2.9559	5e-05	0.000280515	yes
ZBTB40	ENSG00000184677	con72	vir_par72	OK	7.01183	19.2219	1.45489	2.74136	4.82669	5e-05	0.000280515	yes
ZNF133	ENSG00000125846	con72	vir_par72	OK	9.14448	25.0421	1.45338	2.73849	2.08993	5e-05	0.000280515	yes
USP2	ENSG00000036672	con72	vir_par72	OK	3.46206	9.47894	1.4531	2.73796	2.42418	5e-05	0.000280515	yes
KLHL25	ENSG00000183655	con72	vir_par72	OK	0.755584	2.06668	1.45165	2.73521	2.34367	5e-05	0.000280515	yes
SLC37A3	ENSG00000157800	con72	vir_par72	OK	28.7618	78.6623	1.45152	2.73496	3.48491	5e-05	0.000280515	yes
ADAM17	ENSG00000151694	con72	vir_par72	OK	25.4652	69.6309	1.4512	2.73435	4.6279	5e-05	0.000280515	yes
DIABLO	ENSG00000184047	con72	vir_par72	OK	81.9462	224.009	1.45081	2.73361	3.08054	5e-05	0.000280515	yes
ZNF410	ENSG00000119725	con72	vir_par72	OK	52.2558	142.821	1.45054	2.7331	2.14194	5e-05	0.000280515	yes
TSPAN13	ENSG00000106537	con72	vir_par72	OK	71.5417	195.52	1.45046	2.73295	5.00539	5e-05	0.000280515	yes
ALS2	ENSG00000003393	con72	vir_par72	OK	19.3567	52.8956	1.45031	2.73267	3.01236	5e-05	0.000280515	yes
ZNF202	ENSG00000166261	con72	vir_par72	OK	6.02768	16.4689	1.45007	2.73221	2.94229	5e-05	0.000280515	yes
ERF	ENSG00000105722	con72	vir_par72	OK	15.5713	42.5402	1.44993	2.73195	3.1566	5e-05	0.000280515	yes
ACVR1	ENSG00000115170	con72	vir_par72	OK	11.9453	32.6113	1.44893	2.73005	3.53461	5e-05	0.000280515	yes
CTC-444N24.11	ENSG00000268205	con72	vir_par72	OK	11.5365	31.4914	1.44875	2.72971	4.45007	5e-05	0.000280515	yes
FAM47E-STBD1	ENSG00000272414	con72	vir_par72	OK	6.77276	18.487	1.4487	2.72962	3.12915	5e-05	0.000280515	yes
RP3-406P24.1	ENSG00000216657	con72	vir_par72	OK	25.6931	70.0996	1.44802	2.72833	4.08471	5e-05	0.000280515	yes
TBCCD1	ENSG00000113838	con72	vir_par72	OK	9.0711	24.7431	1.44768	2.72769	1.67266	5e-05	0.000280515	yes
GPN2	ENSG00000142751	con72	vir_par72	OK	7.738	21.1058	1.4476	2.72754	2.8567	5e-05	0.000280515	yes
NPIPB15	ENSG00000196436	con72	vir_par72	OK	0.59954	1.63507	1.44742	2.7272	2.13502	5e-05	0.000280515	yes
HSP90AA1	ENSG00000080824	con72	vir_par72	OK	188.915	515.2	1.44739	2.72714	2.75471	5e-05	0.000280515	yes
IFNLR1	ENSG00000185436	con72	vir_par72	OK	7.78004	21.214	1.44716	2.72671	3.89851	5e-05	0.000280515	yes
PPP1R14C	ENSG00000198729	con72	vir_par72	OK	2.36057	6.43648	1.44714	2.72667	3.12742	5e-05	0.000280515	yes
MUC20	ENSG00000176945	con72	vir_par72	OK	5.98876	16.3146	1.44583	2.7242	1.98837	5e-05	0.000280515	yes
ANKRD40	ENSG00000154945	con72	vir_par72	OK	21.922	59.6805	1.44488	2.7224	4.78794	5e-05	0.000280515	yes
ARL14	ENSG00000179674	con72	vir_par72	OK	2.95849	8.04686	1.44357	2.71993	2.90459	5e-05	0.000280515	yes
ZBTB48	ENSG00000204859	con72	vir_par72	OK	11.213	30.495	1.4434	2.71961	3.25137	5e-05	0.000280515	yes
STK19	ENSG00000204344	con72	vir_par72	OK	5.17022	14.06	1.4433	2.71942	2.07592	5e-05	0.000280515	yes
ZNF609	ENSG00000180357	con72	vir_par72	OK	18.1839	49.3218	1.43956	2.71238	1.97542	5e-05	0.000280515	yes
CBWD6	ENSG00000204790	con72	vir_par72	OK	0.976011	2.64588	1.43878	2.71092	1.99058	5e-05	0.000280515	yes
ARID5A	ENSG00000196843	con72	vir_par72	OK	1.16575	3.15957	1.43847	2.71033	2.24871	5e-05	0.000280515	yes
BET1L	ENSG00000177951	con72	vir_par72	OK	18.4501	49.9785	1.43768	2.70885	4.22576	5e-05	0.000280515	yes
AGPAT6	ENSG00000158669	con72	vir_par72	OK	34.5454	93.5704	1.43756	2.70862	2.81752	5e-05	0.000280515	yes
CELSR3	ENSG00000008300	con72	vir_par72	OK	3.54643	9.60312	1.43714	2.70784	3.01871	5e-05	0.000280515	yes
FLCN	ENSG00000154803	con72	vir_par72	OK	11.6268	31.4652	1.4363	2.70626	1.48168	5e-05	0.000280515	yes
CPSF7	ENSG00000149532	con72	vir_par72	OK	65.6367	177.268	1.43335	2.70073	2.40787	5e-05	0.000280515	yes
SMG1	ENSG00000157106	con72	vir_par72	OK	11.9942	32.3604	1.43189	2.698	3.38321	5e-05	0.000280515	yes
CTC-444N24.8	ENSG00000268713	con72	vir_par72	OK	1.92576	5.19561	1.43186	2.69794	2.68123	5e-05	0.000280515	yes
BCL2L13	ENSG00000099968	con72	vir_par72	OK	80.7303	217.723	1.43131	2.69691	2.66873	5e-05	0.000280515	yes
LRRC37A2	ENSG00000238083	con72	vir_par72	OK	0.388572	1.0479	1.43124	2.69678	2.03349	5e-05	0.000280515	yes
NDUFAF2	ENSG00000164182	con72	vir_par72	OK	41.8077	112.674	1.43032	2.69506	3.42486	5e-05	0.000280515	yes
SS18L2	ENSG00000008324	con72	vir_par72	OK	24.9335	67.1881	1.43012	2.69469	1.63012	0.0004	0.00193713	yes
MAST4	ENSG00000069020	con72	vir_par72	OK	3.544	9.54927	1.43001	2.69449	1.44281	5e-05	0.000280515	yes
GSPT2	ENSG00000189369	con72	vir_par72	OK	14.2367	38.347	1.42949	2.69351	4.57138	5e-05	0.000280515	yes
INSIG2	ENSG00000125629	con72	vir_par72	OK	39.4982	106.383	1.4294	2.69335	3.87106	5e-05	0.000280515	yes
RP11-384K6.6	ENSG00000260404	con72	vir_par72	OK	0.900622	2.4214	1.42685	2.68859	2.66468	5e-05	0.000280515	yes
NBPF10	ENSG00000163386	con72	vir_par72	OK	2.30235	6.18841	1.42646	2.68786	2.78925	5e-05	0.000280515	yes
PPP4C	ENSG00000149923	con72	vir_par72	OK	18.9151	50.8403	1.42643	2.68781	4.08187	5e-05	0.000280515	yes
TRIM5	ENSG00000132256	con72	vir_par72	OK	38.272	102.821	1.42578	2.6866	4.06361	5e-05	0.000280515	yes
GOLGB1	ENSG00000173230	con72	vir_par72	OK	12.5802	33.7898	1.42543	2.68595	2.70065	5e-05	0.000280515	yes
ETF1	ENSG00000120705	con72	vir_par72	OK	86.8235	233.033	1.42437	2.68397	4.45934	5e-05	0.000280515	yes
ALAS1	ENSG00000023330	con72	vir_par72	OK	36.9764	99.147	1.42296	2.68135	4.76434	5e-05	0.000280515	yes
ARPC5L	ENSG00000136950	con72	vir_par72	OK	10.9023	29.1991	1.4213	2.67827	3.87705	5e-05	0.000280515	yes
GRAMD3	ENSG00000155324	con72	vir_par72	OK	10.0801	26.9546	1.41901	2.67402	3.13063	5e-05	0.000280515	yes
ZNF674-AS1	ENSG00000230844	con72	vir_par72	OK	5.15062	13.7701	1.41872	2.67348	3.33249	5e-05	0.000280515	yes
DNAJA4	ENSG00000140403	con72	vir_par72	OK	15.235	40.7279	1.41863	2.67332	2.46433	5e-05	0.000280515	yes
RBM33	ENSG00000184863	con72	vir_par72	OK	10.7778	28.8019	1.4181	2.67233	3.81576	5e-05	0.000280515	yes
IZUMO1	ENSG00000182264	con72	vir_par72	OK	2.86435	7.65236	1.4177	2.67159	1.87498	5e-05	0.000280515	yes
LINC00843	ENSG00000178440	con72	vir_par72	OK	2.80055	7.48014	1.41735	2.67094	1.22314	0.00735	0.0261384	yes
SLC6A12	ENSG00000111181	con72	vir_par72	OK	0.654269	1.74747	1.41731	2.67087	0.993656	5e-05	0.000280515	yes
PPP4R2	ENSG00000163605	con72	vir_par72	OK	32.7868	87.4898	1.416	2.66845	3.31516	5e-05	0.000280515	yes
DDA1	ENSG00000130311	con72	vir_par72	OK	7.15748	19.0952	1.41569	2.66787	2.28311	5e-05	0.000280515	yes
SLC3A2	ENSG00000168003	con72	vir_par72	OK	296.963	791.787	1.41483	2.66628	3.86538	5e-05	0.000280515	yes
N4BP1	ENSG00000102921	con72	vir_par72	OK	16.5467	44.11	1.41457	2.6658	2.74316	5e-05	0.000280515	yes
ZNF3	ENSG00000166526	con72	vir_par72	OK	47.2376	125.895	1.41421	2.66514	2.79268	5e-05	0.000280515	yes
DAGLB	ENSG00000164535	con72	vir_par72	OK	5.30876	14.1179	1.41108	2.65936	1.01081	0.00235	0.00956308	yes
C17orf96	ENSG00000179294	con72	vir_par72	OK	13.948	37.0239	1.4084	2.65443	4.54529	5e-05	0.000280515	yes
GLRX3	ENSG00000108010	con72	vir_par72	OK	35.7076	94.7618	1.40808	2.65384	3.79875	5e-05	0.000280515	yes
TGFA	ENSG00000163235	con72	vir_par72	OK	20.3515	53.9796	1.40727	2.65235	4.30093	5e-05	0.000280515	yes
RYBP	ENSG00000163602	con72	vir_par72	OK	18.0524	47.8624	1.4067	2.6513	4.92641	5e-05	0.000280515	yes
SRP72P1	ENSG00000265182	con72	vir_par72	OK	0.915723	2.42742	1.40644	2.65082	2.41639	5e-05	0.000280515	yes
PCOLCE2	ENSG00000163710	con72	vir_par72	OK	0.848186	2.24756	1.40591	2.64985	0.678973	0.01125	0.0377919	yes
APPBP2	ENSG00000062725	con72	vir_par72	OK	40.2538	106.617	1.40524	2.64862	2.31877	5e-05	0.000280515	yes
STIP1	ENSG00000168439	con72	vir_par72	OK	131.71	348.837	1.40519	2.64853	3.86276	5e-05	0.000280515	yes
OSTM1	ENSG00000081087	con72	vir_par72	OK	38.6931	102.454	1.40483	2.64787	3.06043	5e-05	0.000280515	yes
MYCBP2	ENSG00000005810	con72	vir_par72	OK	11.4775	30.382	1.40441	2.6471	2.14848	5e-05	0.000280515	yes
CLTC	ENSG00000141367	con72	vir_par72	OK	125.102	331.052	1.40395	2.64625	3.03128	5e-05	0.000280515	yes
ZNF460	ENSG00000197714	con72	vir_par72	OK	2.80915	7.43192	1.4036	2.64561	3.14678	5e-05	0.000280515	yes
ABHD5	ENSG00000011198	con72	vir_par72	OK	10.0951	26.6653	1.40131	2.64141	1.79819	5e-05	0.000280515	yes
TTN-AS1	ENSG00000237298	con72	vir_par72	OK	7.70415	20.3469	1.4011	2.64103	2.37183	5e-05	0.000280515	yes
AKIRIN1	ENSG00000174574	con72	vir_par72	OK	41.9489	110.758	1.40071	2.64031	4.31051	5e-05	0.000280515	yes
AVPI1	ENSG00000119986	con72	vir_par72	OK	7.97186	21.0451	1.4005	2.63993	3.60591	5e-05	0.000280515	yes
NR1D1	ENSG00000126368	con72	vir_par72	OK	12.7983	33.753	1.39906	2.6373	2.62952	5e-05	0.000280515	yes
GPX3	ENSG00000211445	con72	vir_par72	OK	14.9053	39.302	1.39878	2.63679	3.34876	5e-05	0.000280515	yes
SLC30A5	ENSG00000145740	con72	vir_par72	OK	40.9744	107.997	1.39819	2.63571	3.56581	5e-05	0.000280515	yes
DERL2	ENSG00000072849	con72	vir_par72	OK	38.3296	100.978	1.39751	2.63446	1.43429	5e-05	0.000280515	yes
PPTC7	ENSG00000196850	con72	vir_par72	OK	17.1106	45.0619	1.39702	2.63357	3.02062	5e-05	0.000280515	yes
ZNF554	ENSG00000172006	con72	vir_par72	OK	3.83387	10.0967	1.397	2.63353	3.57309	5e-05	0.000280515	yes
LINC01128	ENSG00000228794	con72	vir_par72	OK	5.48243	14.4313	1.39631	2.63227	1.76194	0.00015	0.000786087	yes
PDRG1	ENSG00000088356	con72	vir_par72	OK	23.656	62.2628	1.39616	2.632	4.3926	5e-05	0.000280515	yes
TMEM199	ENSG00000244045	con72	vir_par72	OK	5.83836	15.3662	1.39612	2.63193	1.48916	0.0001	0.000538822	yes
PCNXL2	ENSG00000135749	con72	vir_par72	OK	16.4988	43.4189	1.39596	2.63164	1.73966	5e-05	0.000280515	yes
PPP4R1	ENSG00000154845	con72	vir_par72	OK	24.5463	64.5883	1.39577	2.63129	3.16203	5e-05	0.000280515	yes
RPS6KA5	ENSG00000100784	con72	vir_par72	OK	9.82827	25.8485	1.39507	2.63001	2.93804	5e-05	0.000280515	yes
CYTH1	ENSG00000108669	con72	vir_par72	OK	34.7166	91.289	1.39482	2.62956	3.53289	5e-05	0.000280515	yes
SGTA	ENSG00000104969	con72	vir_par72	OK	13.6482	35.8876	1.39478	2.62948	3.29145	5e-05	0.000280515	yes
MED27	ENSG00000160563	con72	vir_par72	OK	8.78806	23.1024	1.39442	2.62883	2.9093	5e-05	0.000280515	yes
NPLOC4	ENSG00000182446	con72	vir_par72	OK	20.6179	54.1751	1.39373	2.62757	2.31013	5e-05	0.000280515	yes
ZNF699	ENSG00000196110	con72	vir_par72	OK	11.4257	30.0168	1.39349	2.62713	3.70348	5e-05	0.000280515	yes
GTF2E1	ENSG00000153767	con72	vir_par72	OK	18.9126	49.6547	1.39258	2.62548	1.98834	5e-05	0.000280515	yes
AAR2	ENSG00000131043	con72	vir_par72	OK	10.9049	28.6296	1.39253	2.62539	4.08248	5e-05	0.000280515	yes
ZNF335	ENSG00000198026	con72	vir_par72	OK	1.58111	4.15027	1.39227	2.62491	2.99938	5e-05	0.000280515	yes
BAK1	ENSG00000030110	con72	vir_par72	OK	12.5696	32.9861	1.39192	2.62428	4.11173	5e-05	0.000280515	yes
C1orf52	ENSG00000162642	con72	vir_par72	OK	12.5873	33.0064	1.39078	2.6222	3.54694	5e-05	0.000280515	yes
NAMPTL	ENSG00000229644	con72	vir_par72	OK	96.3084	252.357	1.38973	2.6203	3.46835	5e-05	0.000280515	yes
MON1B	ENSG00000103111	con72	vir_par72	OK	11.0216	28.877	1.38959	2.62004	3.1367	5e-05	0.000280515	yes
TRAF3	ENSG00000131323	con72	vir_par72	OK	4.34386	11.3785	1.38927	2.61946	2.81715	5e-05	0.000280515	yes
TOR1B	ENSG00000136816	con72	vir_par72	OK	17.1447	44.8741	1.38812	2.61737	3.93578	5e-05	0.000280515	yes
LSG1	ENSG00000041802	con72	vir_par72	OK	18.6369	48.7689	1.3878	2.61679	2.82054	5e-05	0.000280515	yes
TOX2	ENSG00000124191	con72	vir_par72	OK	3.70475	9.69096	1.38726	2.61581	2.70137	5e-05	0.000280515	yes
C3orf58	ENSG00000181744	con72	vir_par72	OK	0.407567	1.06454	1.38511	2.61192	1.35854	5e-05	0.000280515	yes
WDR75	ENSG00000115368	con72	vir_par72	OK	77.4523	202.236	1.38466	2.6111	3.28511	5e-05	0.000280515	yes
CHKA	ENSG00000110721	con72	vir_par72	OK	32.9379	85.9534	1.38381	2.60957	3.58984	5e-05	0.000280515	yes
TM2D2	ENSG00000169490	con72	vir_par72	OK	26.1071	68.0901	1.383	2.6081	2.95175	5e-05	0.000280515	yes
SENP2	ENSG00000163904	con72	vir_par72	OK	34.2538	89.0262	1.37797	2.59902	3.1869	5e-05	0.000280515	yes
SOWAHC	ENSG00000198142	con72	vir_par72	OK	18.9044	49.1037	1.37711	2.59748	4.74178	5e-05	0.000280515	yes
PTPN1	ENSG00000196396	con72	vir_par72	OK	14.9475	38.825	1.37708	2.59742	4.53194	5e-05	0.000280515	yes
YWHAG	ENSG00000170027	con72	vir_par72	OK	165.979	431.07	1.37693	2.59715	4.49103	5e-05	0.000280515	yes
AGFG1	ENSG00000173744	con72	vir_par72	OK	33.8486	87.8969	1.37672	2.59677	2.97606	5e-05	0.000280515	yes
MAPKAP1	ENSG00000119487	con72	vir_par72	OK	36.2667	94.1453	1.37624	2.59591	4.11112	5e-05	0.000280515	yes
NIFK	ENSG00000155438	con72	vir_par72	OK	50.1137	129.995	1.37518	2.594	3.92856	5e-05	0.000280515	yes
SLC9A1	ENSG00000090020	con72	vir_par72	OK	23.211	60.1871	1.37464	2.59303	1.83628	5e-05	0.000280515	yes
ATAT1	ENSG00000137343	con72	vir_par72	OK	4.78946	12.4134	1.37397	2.59183	2.67084	5e-05	0.000280515	yes
CLCN4	ENSG00000073464	con72	vir_par72	OK	2.89611	7.50587	1.3739	2.5917	3.76423	5e-05	0.000280515	yes
NR1D2	ENSG00000174738	con72	vir_par72	OK	46.3832	120.193	1.37367	2.59129	1.79806	5e-05	0.000280515	yes
ABHD3	ENSG00000158201	con72	vir_par72	OK	31.4441	81.3834	1.37194	2.58818	3.5639	5e-05	0.000280515	yes
MED17	ENSG00000042429	con72	vir_par72	OK	23.9278	61.9139	1.37157	2.58752	0.985654	0.00125	0.00543393	yes
TRANK1	ENSG00000168016	con72	vir_par72	OK	3.69855	9.56596	1.37095	2.58641	1.09457	0.0136	0.0444434	yes
GPATCH3	ENSG00000198746	con72	vir_par72	OK	3.17582	8.21381	1.37092	2.58635	2.07449	5e-05	0.000280515	yes
DGKH	ENSG00000102780	con72	vir_par72	OK	2.02897	5.24357	1.3698	2.58435	3.44345	5e-05	0.000280515	yes
BTN2A3P	ENSG00000124549	con72	vir_par72	OK	2.89573	7.48089	1.36928	2.58342	2.82951	5e-05	0.000280515	yes
MIDN	ENSG00000167470	con72	vir_par72	OK	23.2739	60.063	1.36776	2.5807	4.33289	5e-05	0.000280515	yes
CHMP4B	ENSG00000101421	con72	vir_par72	OK	35.4001	91.2711	1.3664	2.57826	4.69017	5e-05	0.000280515	yes
AKAP10	ENSG00000108599	con72	vir_par72	OK	14.5201	37.4272	1.36604	2.57762	3.34846	5e-05	0.000280515	yes
RP11-574K11.28	ENSG00000271816	con72	vir_par72	OK	1.81876	4.68538	1.36521	2.57614	2.04288	5e-05	0.000280515	yes
ENPP1	ENSG00000197594	con72	vir_par72	OK	0.621991	1.60232	1.3652	2.57612	2.44268	5e-05	0.000280515	yes
LNX2	ENSG00000139517	con72	vir_par72	OK	25.6291	66.0132	1.36497	2.57571	4.7646	5e-05	0.000280515	yes
COX10	ENSG00000006695	con72	vir_par72	OK	14.9637	38.5232	1.36426	2.57444	3.42699	5e-05	0.000280515	yes
ZNF217	ENSG00000171940	con72	vir_par72	OK	63.3907	163.02	1.3627	2.57166	2.539	5e-05	0.000280515	yes
CALU	ENSG00000128595	con72	vir_par72	OK	185.499	476.823	1.36204	2.57048	4.33668	5e-05	0.000280515	yes
FHL2	ENSG00000115641	con72	vir_par72	OK	78.1825	200.843	1.36115	2.5689	4.48346	5e-05	0.000280515	yes
RHOF	ENSG00000139725	con72	vir_par72	OK	19.553	50.2254	1.36103	2.56869	3.50473	5e-05	0.000280515	yes
GIGYF2	ENSG00000204120	con72	vir_par72	OK	87.8409	225.608	1.36085	2.56836	2.02019	5e-05	0.000280515	yes
ZNF561	ENSG00000171469	con72	vir_par72	OK	57.1074	146.598	1.36012	2.56707	2.40251	5e-05	0.000280515	yes
KIFC3	ENSG00000140859	con72	vir_par72	OK	2.9567	7.5826	1.3587	2.56454	1.2582	0.00035	0.0017153	yes
PHLPP2	ENSG00000040199	con72	vir_par72	OK	3.85299	9.86937	1.35698	2.56148	3.25752	5e-05	0.000280515	yes
NADK	ENSG00000008130	con72	vir_par72	OK	17.8953	45.8183	1.35634	2.56035	2.73342	5e-05	0.000280515	yes
RRN3	ENSG00000085721	con72	vir_par72	OK	28.5543	73.0972	1.35611	2.55994	2.98119	5e-05	0.000280515	yes
SMN1	ENSG00000172062	con72	vir_par72	OK	2.89386	7.40334	1.35518	2.55829	2.75226	5e-05	0.000280515	yes
FBXL18	ENSG00000155034	con72	vir_par72	OK	1.09906	2.81053	1.35458	2.55723	2.44947	5e-05	0.000280515	yes
ZNF239	ENSG00000196793	con72	vir_par72	OK	19.1462	48.9579	1.35448	2.55705	3.15903	5e-05	0.000280515	yes
MED10	ENSG00000133398	con72	vir_par72	OK	35.5695	90.9428	1.35432	2.55677	4.07454	5e-05	0.000280515	yes
ATXN1L	ENSG00000224470	con72	vir_par72	OK	14.2598	36.4433	1.3537	2.55567	1.62379	5e-05	0.000280515	yes
SLK	ENSG00000065613	con72	vir_par72	OK	18.1021	46.2575	1.35353	2.55537	4.67518	5e-05	0.000280515	yes
ZNF490	ENSG00000188033	con72	vir_par72	OK	4.14711	10.5947	1.35317	2.55473	1.33466	0.00125	0.00543393	yes
CDK12	ENSG00000167258	con72	vir_par72	OK	20.3728	52.007	1.35206	2.55276	2.54725	5e-05	0.000280515	yes
RPS6KB2	ENSG00000175634	con72	vir_par72	OK	10.6093	27.0682	1.35127	2.55137	3.0128	5e-05	0.000280515	yes
ZNF44	ENSG00000197857	con72	vir_par72	OK	9.16025	23.3684	1.3511	2.55107	2.991	5e-05	0.000280515	yes
RP1-153G14.4	ENSG00000271755	con72	vir_par72	OK	0.644866	1.64295	1.34922	2.54774	2.257	5e-05	0.000280515	yes
GPRC5A	ENSG00000013588	con72	vir_par72	OK	79.2993	201.974	1.34879	2.54698	2.73027	5e-05	0.000280515	yes
PDGFB	ENSG00000100311	con72	vir_par72	OK	1.30327	3.31543	1.34706	2.54393	1.76499	0.00015	0.000786087	yes
MTHFD2	ENSG00000065911	con72	vir_par72	OK	232.734	591.995	1.3469	2.54365	3.65847	5e-05	0.000280515	yes
C9orf72	ENSG00000147894	con72	vir_par72	OK	24.2129	61.5645	1.34632	2.54263	4.01297	5e-05	0.000280515	yes
AC093673.5	ENSG00000232533	con72	vir_par72	OK	6.51026	16.5503	1.34607	2.54219	2.74765	5e-05	0.000280515	yes
C2orf49	ENSG00000135974	con72	vir_par72	OK	17.9143	45.5382	1.34597	2.54201	3.39697	5e-05	0.000280515	yes
FKRP	ENSG00000181027	con72	vir_par72	OK	7.60833	19.3285	1.34508	2.54044	0.673527	0.0006	0.00279836	yes
RNF11	ENSG00000123091	con72	vir_par72	OK	78.2481	198.761	1.34491	2.54014	3.69458	5e-05	0.000280515	yes
SDCBP	ENSG00000137575	con72	vir_par72	OK	129.179	327.834	1.3436	2.53784	3.96732	5e-05	0.000280515	yes
AP1M1	ENSG00000072958	con72	vir_par72	OK	3.92962	9.96881	1.34303	2.53684	1.75626	5e-05	0.000280515	yes
UIMC1	ENSG00000087206	con72	vir_par72	OK	15.4064	39.0402	1.34142	2.53401	3.58933	5e-05	0.000280515	yes
POM121	ENSG00000196313	con72	vir_par72	OK	5.12845	12.9908	1.3409	2.53309	3.78461	5e-05	0.000280515	yes
HABP4	ENSG00000130956	con72	vir_par72	OK	7.95448	20.145	1.34058	2.53253	3.02859	5e-05	0.000280515	yes
PDE12	ENSG00000174840	con72	vir_par72	OK	8.73889	22.1278	1.34034	2.53211	3.92075	5e-05	0.000280515	yes
SCYL1	ENSG00000142186	con72	vir_par72	OK	9.25458	23.4138	1.33912	2.52997	3.26703	5e-05	0.000280515	yes
PROSER2	ENSG00000148426	con72	vir_par72	OK	12.6066	31.8815	1.33854	2.52895	3.43847	5e-05	0.000280515	yes
C12orf5	ENSG00000078237	con72	vir_par72	OK	18.663	47.1973	1.33852	2.52892	4.02968	5e-05	0.000280515	yes
KDM3A	ENSG00000115548	con72	vir_par72	OK	13.7113	34.6541	1.33766	2.52741	3.97455	5e-05	0.000280515	yes
SCAF4	ENSG00000156304	con72	vir_par72	OK	12.8483	32.4664	1.33737	2.5269	3.48865	5e-05	0.000280515	yes
TRIM39	ENSG00000204599	con72	vir_par72	OK	8.11103	20.4953	1.33734	2.52685	2.09529	5e-05	0.000280515	yes
CREB3	ENSG00000107175	con72	vir_par72	OK	20.5595	51.8944	1.33577	2.5241	1.44141	0.0013	0.00562895	yes
SF3B3	ENSG00000189091	con72	vir_par72	OK	55.2667	139.399	1.33474	2.5223	2.0739	5e-05	0.000280515	yes
SLC30A7	ENSG00000162695	con72	vir_par72	OK	19.4144	48.923	1.33339	2.51994	2.99254	5e-05	0.000280515	yes
URB1	ENSG00000142207	con72	vir_par72	OK	5.7012	14.3657	1.3333	2.51978	4.00523	5e-05	0.000280515	yes
SRP72P2	ENSG00000188451	con72	vir_par72	OK	7.82691	19.7034	1.33193	2.51739	2.4575	5e-05	0.000280515	yes
TTC4	ENSG00000243725	con72	vir_par72	OK	41.4872	104.437	1.3319	2.51734	2.72887	5e-05	0.000280515	yes
OTUD3	ENSG00000169914	con72	vir_par72	OK	9.18754	23.1251	1.33171	2.51701	3.59919	5e-05	0.000280515	yes
NUP50	ENSG00000093000	con72	vir_par72	OK	35.5528	89.481	1.33162	2.51685	2.98078	5e-05	0.000280515	yes
SLC39A7	ENSG00000112473	con72	vir_par72	OK	60.0017	150.827	1.32982	2.51371	4.03726	5e-05	0.000280515	yes
BRPF3	ENSG00000096070	con72	vir_par72	OK	15.1237	37.9866	1.32868	2.51173	3.10654	5e-05	0.000280515	yes
ZNF200	ENSG00000010539	con72	vir_par72	OK	9.54259	23.9642	1.32843	2.51129	3.56316	5e-05	0.000280515	yes
ZNF670	ENSG00000135747	con72	vir_par72	OK	5.66037	14.1995	1.32688	2.5086	2.86666	5e-05	0.000280515	yes
BLCAP	ENSG00000166619	con72	vir_par72	OK	31.8852	79.944	1.3261	2.50724	4.20007	5e-05	0.000280515	yes
GORASP2	ENSG00000115806	con72	vir_par72	OK	49.1156	123.001	1.32442	2.50432	3.91096	5e-05	0.000280515	yes
NR6A1	ENSG00000148200	con72	vir_par72	OK	2.87276	7.19314	1.32418	2.50391	3.59158	5e-05	0.000280515	yes
CHD9	ENSG00000177200	con72	vir_par72	OK	8.65295	21.6433	1.32265	2.50125	1.41904	5e-05	0.000280515	yes
SRSF8	ENSG00000271885	con72	vir_par72	OK	11.9078	29.7488	1.32092	2.49825	2.36541	5e-05	0.000280515	yes
KIAA0907	ENSG00000132680	con72	vir_par72	OK	25.8957	64.6437	1.31979	2.4963	3.30779	5e-05	0.000280515	yes
ZNF571	ENSG00000180479	con72	vir_par72	OK	8.63106	21.5436	1.31965	2.49606	1.32202	5e-05	0.000280515	yes
EIF3A	ENSG00000107581	con72	vir_par72	OK	77.6816	193.695	1.31814	2.49344	4.28631	5e-05	0.000280515	yes
BAG1	ENSG00000107262	con72	vir_par72	OK	18.762	46.7647	1.31761	2.49253	3.77039	5e-05	0.000280515	yes
INPP1	ENSG00000151689	con72	vir_par72	OK	23.1302	57.6271	1.31697	2.49142	1.70228	5e-05	0.000280515	yes
BOD1	ENSG00000145919	con72	vir_par72	OK	55.6183	138.521	1.31648	2.49058	4.27138	5e-05	0.000280515	yes
TAGLN	ENSG00000149591	con72	vir_par72	OK	2.08431	5.1898	1.31611	2.48994	1.09007	0.0127	0.0419115	yes
SORBS1	ENSG00000095637	con72	vir_par72	OK	1.94227	4.83453	1.31563	2.48911	1.97091	5e-05	0.000280515	yes
XPO6	ENSG00000169180	con72	vir_par72	OK	32.6476	81.2483	1.31536	2.48864	1.96834	5e-05	0.000280515	yes
C1orf27	ENSG00000157181	con72	vir_par72	OK	26.3791	65.6454	1.3153	2.48854	3.17975	5e-05	0.000280515	yes
NOTCH2NL	ENSG00000213240	con72	vir_par72	OK	2.82299	7.02402	1.31507	2.48814	1.92866	5e-05	0.000280515	yes
MPV17L2	ENSG00000254858	con72	vir_par72	OK	4.34792	10.8163	1.31481	2.4877	2.59475	5e-05	0.000280515	yes
NIPA2	ENSG00000140157	con72	vir_par72	OK	23.8417	59.2913	1.31433	2.48687	2.55674	5e-05	0.000280515	yes
CHAC2	ENSG00000143942	con72	vir_par72	OK	9.82862	24.4402	1.31419	2.48663	1.15589	0.0056	0.0206091	yes
ARRDC4	ENSG00000140450	con72	vir_par72	OK	63.4025	157.631	1.31394	2.4862	4.40605	5e-05	0.000280515	yes
ZNF136	ENSG00000196646	con72	vir_par72	OK	12.9488	32.1841	1.31352	2.48547	2.03191	5e-05	0.000280515	yes
UQCRFS1	ENSG00000169021	con72	vir_par72	OK	37.7197	93.7488	1.31348	2.4854	4.19948	5e-05	0.000280515	yes
CTC-512J14.5	ENSG00000248569	con72	vir_par72	OK	17.6494	43.8612	1.31332	2.48513	3.49325	5e-05	0.000280515	yes
OTUD7B	ENSG00000163113	con72	vir_par72	OK	8.49808	21.115	1.31306	2.48468	4.42421	5e-05	0.000280515	yes
RP11-815I9.4	ENSG00000264885	con72	vir_par72	OK	2.81286	6.98698	1.31263	2.48394	1.1328	0.01305	0.0428919	yes
SESN2	ENSG00000130766	con72	vir_par72	OK	17.7536	44.072	1.31175	2.48242	4.25586	5e-05	0.000280515	yes
FMNL2	ENSG00000157827	con72	vir_par72	OK	10.7918	26.7574	1.31	2.47942	3.36439	5e-05	0.000280515	yes
ZNF131	ENSG00000172262	con72	vir_par72	OK	23.5931	58.4421	1.30864	2.47708	3.16951	5e-05	0.000280515	yes
RP11-144L1.8	ENSG00000231434	con72	vir_par72	OK	3.54482	8.77443	1.30759	2.47528	3.1848	5e-05	0.000280515	yes
JDP2	ENSG00000140044	con72	vir_par72	OK	21.0736	52.1109	1.30615	2.47281	3.62404	5e-05	0.000280515	yes
ARHGAP42	ENSG00000165895	con72	vir_par72	OK	2.99131	7.39421	1.30562	2.4719	2.48979	5e-05	0.000280515	yes
ARNTL	ENSG00000133794	con72	vir_par72	OK	12.9367	31.9581	1.30471	2.47034	2.45717	5e-05	0.000280515	yes
RABEPK	ENSG00000136933	con72	vir_par72	OK	17.0574	42.1167	1.30399	2.46911	3.83702	5e-05	0.000280515	yes
FADD	ENSG00000168040	con72	vir_par72	OK	11.2466	27.7608	1.30356	2.46837	3.8004	5e-05	0.000280515	yes
TAP1	ENSG00000168394	con72	vir_par72	OK	18.3735	45.3376	1.30308	2.46755	2.89481	5e-05	0.000280515	yes
AKAP2	ENSG00000241978	con72	vir_par72	OK	7.128	17.5845	1.30273	2.46695	3.21332	5e-05	0.000280515	yes
CCDC86	ENSG00000110104	con72	vir_par72	OK	7.71968	19.0414	1.30252	2.46659	3.44036	5e-05	0.000280515	yes
ARL8B	ENSG00000134108	con72	vir_par72	OK	41.4461	102.214	1.30229	2.4662	4.38231	5e-05	0.000280515	yes
SUPT6H	ENSG00000109111	con72	vir_par72	OK	26.4907	65.3288	1.30223	2.4661	2.53923	5e-05	0.000280515	yes
NUAK2	ENSG00000163545	con72	vir_par72	OK	7.33303	18.0761	1.3016	2.46502	3.75371	5e-05	0.000280515	yes
NUP153	ENSG00000124789	con72	vir_par72	OK	20.3339	50.1199	1.3015	2.46485	4.50522	5e-05	0.000280515	yes
ZNF383	ENSG00000188283	con72	vir_par72	OK	10.6071	26.1423	1.30136	2.46461	1.50801	0.0004	0.00193713	yes
RP11-1033A18.1	ENSG00000224411	con72	vir_par72	OK	32.148	79.2123	1.301	2.464	3.81246	5e-05	0.000280515	yes
ZNF436	ENSG00000125945	con72	vir_par72	OK	7.64888	18.8403	1.3005	2.46314	3.90845	5e-05	0.000280515	yes
B4GALT2	ENSG00000117411	con72	vir_par72	OK	10.006	24.6385	1.30006	2.46239	3.07805	5e-05	0.000280515	yes
ARMCX6	ENSG00000198960	con72	vir_par72	OK	20.1956	49.7284	1.30003	2.46234	3.11397	5e-05	0.000280515	yes
N4BP2	ENSG00000078177	con72	vir_par72	OK	6.72209	16.5514	1.29997	2.46224	3.77065	5e-05	0.000280515	yes
ZNF669	ENSG00000188295	con72	vir_par72	OK	8.27538	20.3673	1.29936	2.4612	3.43372	5e-05	0.000280515	yes
ZSCAN9	ENSG00000137185	con72	vir_par72	OK	11.8497	29.1626	1.29927	2.46104	3.55037	5e-05	0.000280515	yes
RP11-1006G14.4	ENSG00000260534	con72	vir_par72	OK	1.86061	4.57248	1.2972	2.45751	2.49283	5e-05	0.000280515	yes
STARD13	ENSG00000133121	con72	vir_par72	OK	7.27357	17.8746	1.29718	2.45748	1.96235	5e-05	0.000280515	yes
RP9	ENSG00000164610	con72	vir_par72	OK	2.59029	6.36225	1.29642	2.45619	2.51249	5e-05	0.000280515	yes
RP11-119F19.2	ENSG00000226381	con72	vir_par72	OK	5.56043	13.6564	1.29631	2.456	2.22636	5e-05	0.000280515	yes
TBC1D25	ENSG00000068354	con72	vir_par72	OK	4.88764	12.0014	1.29599	2.45545	2.09753	5e-05	0.000280515	yes
C20orf24	ENSG00000101084	con72	vir_par72	OK	36.639	89.9657	1.29599	2.45545	1.71585	0.00095	0.0042445	yes
ILKAP	ENSG00000132323	con72	vir_par72	OK	12.5816	30.8817	1.29544	2.45452	3.3338	5e-05	0.000280515	yes
TRIM11	ENSG00000154370	con72	vir_par72	OK	7.19809	17.6544	1.29434	2.45265	3.01227	5e-05	0.000280515	yes
44262	ENSG00000136536	con72	vir_par72	OK	63.8867	156.682	1.29425	2.45249	3.07276	5e-05	0.000280515	yes
PBX4	ENSG00000105717	con72	vir_par72	OK	1.79306	4.39605	1.29378	2.4517	1.41795	0.00085	0.0038374	yes
KDM6A	ENSG00000147050	con72	vir_par72	OK	9.08382	22.2634	1.2933	2.45088	3.01101	5e-05	0.000280515	yes
KLHL18	ENSG00000114648	con72	vir_par72	OK	7.00602	17.154	1.29188	2.44847	2.59012	5e-05	0.000280515	yes
RNASEH1P2	ENSG00000231458	con72	vir_par72	OK	1.18368	2.89818	1.29187	2.44845	1.99961	5e-05	0.000280515	yes
PWWP2A	ENSG00000170234	con72	vir_par72	OK	9.18208	22.4817	1.29186	2.44844	1.16317	5e-05	0.000280515	yes
GET4	ENSG00000239857	con72	vir_par72	OK	6.86606	16.8108	1.29183	2.44838	0.786489	0.00465	0.0174982	yes
NRP1	ENSG00000099250	con72	vir_par72	OK	1.49712	3.66507	1.29165	2.44808	1.8063	5e-05	0.000280515	yes
SELM	ENSG00000198832	con72	vir_par72	OK	3.26183	7.97966	1.29064	2.44637	2.06393	5e-05	0.000280515	yes
AC005336.4	ENSG00000267056	con72	vir_par72	OK	7.2473	17.7246	1.29023	2.44567	3.06532	5e-05	0.000280515	yes
CLINT1	ENSG00000113282	con72	vir_par72	OK	35.8649	87.6942	1.28991	2.44513	2.78973	5e-05	0.000280515	yes
ZNF608	ENSG00000168916	con72	vir_par72	OK	4.22813	10.3381	1.28988	2.44508	2.75076	5e-05	0.000280515	yes
OPTN	ENSG00000123240	con72	vir_par72	OK	27.7047	67.7203	1.28946	2.44437	3.80645	5e-05	0.000280515	yes
KCNK6	ENSG00000099337	con72	vir_par72	OK	2.04506	4.99872	1.28941	2.44428	2.43749	5e-05	0.000280515	yes
PRPF38A	ENSG00000134748	con72	vir_par72	OK	38.051	92.9563	1.28862	2.44294	2.06222	5e-05	0.000280515	yes
RP1-281H8.3	ENSG00000219553	con72	vir_par72	OK	2.78945	6.81254	1.28821	2.44225	2.26927	5e-05	0.000280515	yes
ZFPL1	ENSG00000162300	con72	vir_par72	OK	17.2899	42.2026	1.2874	2.44088	2.04536	5e-05	0.000280515	yes
MALT1	ENSG00000172175	con72	vir_par72	OK	8.83708	21.5664	1.28714	2.44044	3.46403	5e-05	0.000280515	yes
BTBD11	ENSG00000151136	con72	vir_par72	OK	0.879763	2.14568	1.28625	2.43893	1.96163	5e-05	0.000280515	yes
STX5	ENSG00000162236	con72	vir_par72	OK	26.1234	63.6953	1.28584	2.43824	3.98399	5e-05	0.000280515	yes
NT5DC3	ENSG00000111696	con72	vir_par72	OK	6.97771	16.9927	1.28409	2.43528	2.54749	5e-05	0.000280515	yes
ASCC3	ENSG00000112249	con72	vir_par72	OK	11.6457	28.3506	1.28359	2.43444	3.8675	5e-05	0.000280515	yes
RHOQP2	ENSG00000232742	con72	vir_par72	OK	6.15159	14.9682	1.28286	2.43321	2.4719	5e-05	0.000280515	yes
NOS1AP	ENSG00000198929	con72	vir_par72	OK	2.41082	5.86225	1.28193	2.43164	1.24293	0.00115	0.0050426	yes
ZSCAN25	ENSG00000197037	con72	vir_par72	OK	7.1883	17.4639	1.28066	2.4295	1.4375	0.0006	0.00279836	yes
LHFPL2	ENSG00000145685	con72	vir_par72	OK	26.5539	64.5028	1.28044	2.42913	3.19846	5e-05	0.000280515	yes
PDP1	ENSG00000164951	con72	vir_par72	OK	22.797	55.372	1.28031	2.42891	4.15533	5e-05	0.000280515	yes
FAM118B	ENSG00000197798	con72	vir_par72	OK	40.0669	97.2967	1.27998	2.42836	1.12834	0.01355	0.0443017	yes
ASXL2	ENSG00000143970	con72	vir_par72	OK	11.8395	28.7369	1.27929	2.42719	4.03666	5e-05	0.000280515	yes
RAF1	ENSG00000132155	con72	vir_par72	OK	30.2703	73.4668	1.27919	2.42703	2.97403	5e-05	0.000280515	yes
HIVEP1	ENSG00000095951	con72	vir_par72	OK	9.74363	23.6479	1.27918	2.42701	1.3601	0.00365	0.0141325	yes
SLC11A2	ENSG00000110911	con72	vir_par72	OK	29.2694	70.9329	1.27706	2.42345	2.63016	5e-05	0.000280515	yes
AIM1L	ENSG00000176092	con72	vir_par72	OK	9.77263	23.6779	1.27672	2.42288	2.19737	5e-05	0.000280515	yes
USO1	ENSG00000138768	con72	vir_par72	OK	355.597	861.344	1.27635	2.42225	1.52822	0.0001	0.000538822	yes
NCOA7	ENSG00000111912	con72	vir_par72	OK	36.2637	87.8129	1.27591	2.42152	2.94912	5e-05	0.000280515	yes
CDKN1A	ENSG00000124762	con72	vir_par72	OK	73.2314	177.3	1.27566	2.4211	4.4682	5e-05	0.000280515	yes
ZNF14	ENSG00000105708	con72	vir_par72	OK	4.71859	11.4172	1.27477	2.4196	3.40046	5e-05	0.000280515	yes
ZNF317	ENSG00000130803	con72	vir_par72	OK	15.3424	37.1111	1.27433	2.41886	3.22944	5e-05	0.000280515	yes
SSFA2	ENSG00000138434	con72	vir_par72	OK	47.3444	114.363	1.27235	2.41555	3.55544	5e-05	0.000280515	yes
VPS37A	ENSG00000155975	con72	vir_par72	OK	17.6318	42.5387	1.2706	2.41262	1.67184	5e-05	0.000280515	yes
AC005789.11	ENSG00000267473	con72	vir_par72	OK	0.816942	1.97074	1.27044	2.41235	2.04768	5e-05	0.000280515	yes
FEM1A	ENSG00000141965	con72	vir_par72	OK	11.8037	28.451	1.26924	2.41035	4.06582	5e-05	0.000280515	yes
MIEF1	ENSG00000100335	con72	vir_par72	OK	16.1469	38.9093	1.26886	2.40971	3.65791	5e-05	0.000280515	yes
CCT6P1	ENSG00000228409	con72	vir_par72	OK	2.25607	5.43352	1.26808	2.40841	1.62329	0.0006	0.00279836	yes
TOMM40	ENSG00000130204	con72	vir_par72	OK	4.84525	11.667	1.26779	2.40792	1.36014	0.0012	0.00523774	yes
ZNF622	ENSG00000173545	con72	vir_par72	OK	8.36944	20.1512	1.26766	2.40771	3.5124	5e-05	0.000280515	yes
ITGAX	ENSG00000140678	con72	vir_par72	OK	10.3506	24.9169	1.26741	2.40729	1.69049	0.00045	0.00215616	yes
RHOQP3	ENSG00000230756	con72	vir_par72	OK	2.91948	7.02522	1.26683	2.40632	2.15513	5e-05	0.000280515	yes
PDCD11	ENSG00000148843	con72	vir_par72	OK	18.3821	44.2309	1.26675	2.40619	2.51259	5e-05	0.000280515	yes
PMM2	ENSG00000140650	con72	vir_par72	OK	38.6194	92.9024	1.26639	2.40559	2.39921	5e-05	0.000280515	yes
RRN3P1	ENSG00000248124	con72	vir_par72	OK	4.29103	10.3217	1.26628	2.40541	2.29862	5e-05	0.000280515	yes
YIPF5	ENSG00000145817	con72	vir_par72	OK	113.504	272.792	1.26506	2.40337	3.38272	5e-05	0.000280515	yes
THSD1	ENSG00000136114	con72	vir_par72	OK	0.672144	1.61444	1.26419	2.40192	2.32171	5e-05	0.000280515	yes
PKIB	ENSG00000135549	con72	vir_par72	OK	23.9344	57.4851	1.2641	2.40177	3.67439	5e-05	0.000280515	yes
LINC00969	ENSG00000242086	con72	vir_par72	OK	9.9929	23.9994	1.26402	2.40164	1.68777	5e-05	0.000280515	yes
STX16	ENSG00000124222	con72	vir_par72	OK	25.8065	61.9532	1.26344	2.40067	3.26419	5e-05	0.000280515	yes
TMED2	ENSG00000086598	con72	vir_par72	OK	145.782	349.919	1.26321	2.40029	4.32142	5e-05	0.000280515	yes
EDC3	ENSG00000179151	con72	vir_par72	OK	25.7658	61.8386	1.26305	2.40003	2.71555	5e-05	0.000280515	yes
SH3RF2	ENSG00000156463	con72	vir_par72	OK	5.16705	12.3973	1.26262	2.39931	2.88891	5e-05	0.000280515	yes
HERC1	ENSG00000103657	con72	vir_par72	OK	4.64296	11.1394	1.26256	2.39921	1.21428	5e-05	0.000280515	yes
KLHL11	ENSG00000178502	con72	vir_par72	OK	5.47008	13.1181	1.26193	2.39816	3.35433	5e-05	0.000280515	yes
ZNF223	ENSG00000178386	con72	vir_par72	OK	9.87176	23.6699	1.26167	2.39773	1.79331	5e-05	0.000280515	yes
GJB3	ENSG00000188910	con72	vir_par72	OK	4.32769	10.3754	1.26151	2.39747	1.63686	0.0005	0.00237265	yes
RBM15	ENSG00000162775	con72	vir_par72	OK	6.5252	15.6354	1.26072	2.39615	3.64288	5e-05	0.000280515	yes
ITCH	ENSG00000078747	con72	vir_par72	OK	73.7694	176.717	1.26035	2.39554	1.17026	0.0004	0.00193713	yes
TRAF4	ENSG00000076604	con72	vir_par72	OK	28.8402	69.0827	1.26024	2.39536	2.73912	5e-05	0.000280515	yes
CDC14A	ENSG00000079335	con72	vir_par72	OK	6.62593	15.871	1.2602	2.39529	2.75221	5e-05	0.000280515	yes
SNHG16	ENSG00000163597	con72	vir_par72	OK	82.443	197.329	1.25914	2.39353	3.57399	5e-05	0.000280515	yes
MKNK2	ENSG00000099875	con72	vir_par72	OK	190.835	456.689	1.25889	2.39312	1.84545	5e-05	0.000280515	yes
XRRA1	ENSG00000166435	con72	vir_par72	OK	12.4588	29.815	1.25887	2.39308	1.46856	0.00025	0.00125904	yes
NIPBL	ENSG00000164190	con72	vir_par72	OK	14.4195	34.5031	1.25871	2.39282	2.23449	5e-05	0.000280515	yes
DDX24	ENSG00000089737	con72	vir_par72	OK	67.3514	161.134	1.25849	2.39245	4.02673	5e-05	0.000280515	yes
UAP1L1	ENSG00000197355	con72	vir_par72	OK	5.27968	12.6311	1.25845	2.39239	3.31415	5e-05	0.000280515	yes
CREM	ENSG00000095794	con72	vir_par72	OK	14.5848	34.8858	1.25818	2.39194	2.78402	5e-05	0.000280515	yes
FBXO38	ENSG00000145868	con72	vir_par72	OK	43.1537	103.181	1.25762	2.39101	2.65769	5e-05	0.000280515	yes
BRAF	ENSG00000157764	con72	vir_par72	OK	11.7899	28.1865	1.25745	2.39073	2.93674	5e-05	0.000280515	yes
C12orf23	ENSG00000151135	con72	vir_par72	OK	37.5241	89.6962	1.25723	2.39036	3.79633	5e-05	0.000280515	yes
ING1	ENSG00000153487	con72	vir_par72	OK	8.03597	19.2004	1.25659	2.3893	2.92192	5e-05	0.000280515	yes
UBE2H	ENSG00000186591	con72	vir_par72	OK	43.9869	105.053	1.25598	2.38829	3.37008	5e-05	0.000280515	yes
NPIPB4	ENSG00000185864	con72	vir_par72	OK	4.82396	11.5207	1.25594	2.38823	1.4859	5e-05	0.000280515	yes
KDM5A	ENSG00000073614	con72	vir_par72	OK	10.7457	25.6426	1.25479	2.38632	1.33083	5e-05	0.000280515	yes
RBM12	ENSG00000244462	con72	vir_par72	OK	73.3539	174.846	1.25314	2.3836	2.6334	5e-05	0.000280515	yes
RRP8	ENSG00000132275	con72	vir_par72	OK	6.72204	16.0113	1.25212	2.38191	2.3053	5e-05	0.000280515	yes
PARP6	ENSG00000137817	con72	vir_par72	OK	21.3003	50.6545	1.24982	2.37812	2.12645	5e-05	0.000280515	yes
KIAA1244	ENSG00000112379	con72	vir_par72	OK	4.57605	10.8738	1.24869	2.37626	4.16033	5e-05	0.000280515	yes
SRP54	ENSG00000100883	con72	vir_par72	OK	83.4581	198.286	1.24846	2.37588	2.98738	5e-05	0.000280515	yes
CASC7	ENSG00000259758	con72	vir_par72	OK	11.9345	28.3497	1.2482	2.37545	4.23806	5e-05	0.000280515	yes
CDK11A	ENSG00000008128	con72	vir_par72	OK	7.58252	18.0019	1.2474	2.37413	1.97109	5e-05	0.000280515	yes
INTS12	ENSG00000138785	con72	vir_par72	OK	24.6354	58.4851	1.24734	2.37403	2.48008	5e-05	0.000280515	yes
ZNF227	ENSG00000131115	con72	vir_par72	OK	22.3229	52.9926	1.24727	2.37392	2.26878	5e-05	0.000280515	yes
LINC00960	ENSG00000242516	con72	vir_par72	OK	3.82286	9.07441	1.24715	2.37372	2.65925	5e-05	0.000280515	yes
ST6GALNAC6	ENSG00000160408	con72	vir_par72	OK	9.89869	23.4879	1.24661	2.37283	2.56133	5e-05	0.000280515	yes
TCP11L2	ENSG00000166046	con72	vir_par72	OK	12.1408	28.8015	1.24629	2.37231	1.34233	5e-05	0.000280515	yes
SNAPC4	ENSG00000165684	con72	vir_par72	OK	1.1355	2.69343	1.24612	2.37203	2.78249	5e-05	0.000280515	yes
NEU1	ENSG00000204386	con72	vir_par72	OK	20.983	49.7696	1.24604	2.37189	3.73956	5e-05	0.000280515	yes
C16orf87	ENSG00000155330	con72	vir_par72	OK	11.8295	28.0284	1.2445	2.36936	3.37302	5e-05	0.000280515	yes
MED8	ENSG00000159479	con72	vir_par72	OK	27.7934	65.8107	1.24358	2.36785	3.86456	5e-05	0.000280515	yes
EIF2B2	ENSG00000119718	con72	vir_par72	OK	13.4799	31.9131	1.24334	2.36746	3.48962	5e-05	0.000280515	yes
ETF1P3	ENSG00000233833	con72	vir_par72	OK	0.565971	1.33956	1.24296	2.36684	1.59936	0.00035	0.0017153	yes
HSF2	ENSG00000025156	con72	vir_par72	OK	9.08066	21.4906	1.24283	2.36662	3.5171	5e-05	0.000280515	yes
RANBP20P	ENSG00000259144	con72	vir_par72	OK	1.10053	2.6035	1.24225	2.36567	2.26161	5e-05	0.000280515	yes
FTH1P5	ENSG00000230204	con72	vir_par72	OK	35.9613	85.0634	1.24209	2.36541	3.23662	5e-05	0.000280515	yes
FBXO45	ENSG00000174013	con72	vir_par72	OK	12.213	28.8855	1.24192	2.36513	3.40771	5e-05	0.000280515	yes
ZNF77	ENSG00000175691	con72	vir_par72	OK	9.4442	22.3343	1.24176	2.36487	3.36304	5e-05	0.000280515	yes
DESI2	ENSG00000121644	con72	vir_par72	OK	51.9133	122.763	1.24169	2.36475	4.13959	5e-05	0.000280515	yes
SPATA5L1	ENSG00000171763	con72	vir_par72	OK	7.46737	17.6583	1.24167	2.36472	1.73851	5e-05	0.000280515	yes
PDE4B	ENSG00000184588	con72	vir_par72	OK	0.808294	1.9105	1.241	2.36362	1.17714	5e-05	0.000280515	yes
VPS37C	ENSG00000167987	con72	vir_par72	OK	8.22393	19.4228	1.23985	2.36174	1.88741	5e-05	0.000280515	yes
EHD1	ENSG00000110047	con72	vir_par72	OK	10.2474	24.1953	1.23947	2.36112	3.36115	5e-05	0.000280515	yes
EGLN3	ENSG00000129521	con72	vir_par72	OK	5.30198	12.5183	1.23943	2.36105	0.936755	0.0152	0.0488928	yes
FAM220A	ENSG00000178397	con72	vir_par72	OK	10.1937	24.0678	1.23942	2.36104	3.43923	5e-05	0.000280515	yes
RP11-350E12.5	ENSG00000238110	con72	vir_par72	OK	1.17083	2.76225	1.23832	2.35924	1.68853	0.00015	0.000786087	yes
ZCCHC2	ENSG00000141664	con72	vir_par72	OK	9.70599	22.8965	1.23818	2.35901	3.2955	5e-05	0.000280515	yes
TRAF6	ENSG00000175104	con72	vir_par72	OK	4.69062	11.0591	1.23739	2.35772	3.26593	5e-05	0.000280515	yes
RRAGC	ENSG00000116954	con72	vir_par72	OK	19.348	45.6026	1.23693	2.35696	3.9899	5e-05	0.000280515	yes
RP11-761I4.3	ENSG00000259343	con72	vir_par72	OK	3.9336	9.27032	1.23677	2.3567	1.6695	0.00035	0.0017153	yes
FBXL12	ENSG00000127452	con72	vir_par72	OK	7.99422	18.8374	1.23657	2.35638	2.72142	5e-05	0.000280515	yes
STAG3L5P-PVRIG2P-PILRB	ENSG00000272752	con72	vir_par72	OK	4.3872	10.3359	1.2363	2.35594	1.71798	5e-05	0.000280515	yes
SLC5A1	ENSG00000100170	con72	vir_par72	OK	1.98727	4.68063	1.23591	2.3553	2.02522	5e-05	0.000280515	yes
RNU5B-1	ENSG00000200156	con72	vir_par72	OK	728.83	1716.26	1.23561	2.35481	1.72288	0.0002	0.00102556	yes
ADNP2	ENSG00000101544	con72	vir_par72	OK	12.1693	28.6534	1.23546	2.35456	3.56838	5e-05	0.000280515	yes
ZNF598	ENSG00000167962	con72	vir_par72	OK	6.07217	14.2907	1.23479	2.35347	1.78669	5e-05	0.000280515	yes
SERPINB9	ENSG00000170542	con72	vir_par72	OK	15.4677	36.3958	1.23451	2.35301	4.04235	5e-05	0.000280515	yes
SLAIN2	ENSG00000109171	con72	vir_par72	OK	35.6542	83.8867	1.23437	2.35279	1.48184	0.00105	0.00464459	yes
DUSP4	ENSG00000120875	con72	vir_par72	OK	6.62273	15.5788	1.23409	2.35233	3.81728	5e-05	0.000280515	yes
TRNP1	ENSG00000253368	con72	vir_par72	OK	8.65319	20.3504	1.23375	2.35177	2.88884	5e-05	0.000280515	yes
KALRN	ENSG00000160145	con72	vir_par72	OK	2.51151	5.89833	1.23175	2.34852	2.34133	5e-05	0.000280515	yes
DDX10P2	ENSG00000230360	con72	vir_par72	OK	0.887351	2.08388	1.23169	2.34842	2.33931	5e-05	0.000280515	yes
EPS15L1	ENSG00000127527	con72	vir_par72	OK	20.5042	48.1453	1.23148	2.34808	2.57337	5e-05	0.000280515	yes
CRTC3	ENSG00000140577	con72	vir_par72	OK	9.58206	22.4871	1.23069	2.34679	2.97428	5e-05	0.000280515	yes
DUSP12	ENSG00000081721	con72	vir_par72	OK	15.4382	36.2223	1.23037	2.34627	3.27985	5e-05	0.000280515	yes
FASTKD5	ENSG00000215251	con72	vir_par72	OK	10.5924	24.8492	1.23017	2.34595	2.98641	5e-05	0.000280515	yes
SLC25A44	ENSG00000160785	con72	vir_par72	OK	14.3515	33.6669	1.23013	2.34588	2.5637	5e-05	0.000280515	yes
SDHAP1	ENSG00000185485	con72	vir_par72	OK	3.86111	9.04762	1.22852	2.34326	1.82754	5e-05	0.000280515	yes
DRG1	ENSG00000185721	con72	vir_par72	OK	117.492	275.199	1.22792	2.34229	2.04789	5e-05	0.000280515	yes
BICD2	ENSG00000185963	con72	vir_par72	OK	3.78261	8.85937	1.22782	2.34213	3.61251	5e-05	0.000280515	yes
CLDND1	ENSG00000080822	con72	vir_par72	OK	103.031	241.309	1.22781	2.34211	2.79463	5e-05	0.000280515	yes
ATXN2L	ENSG00000168488	con72	vir_par72	OK	54.8937	128.443	1.22642	2.33986	2.48546	5e-05	0.000280515	yes
FOXJ3	ENSG00000198815	con72	vir_par72	OK	26.2378	61.3677	1.22583	2.3389	3.91883	5e-05	0.000280515	yes
FGFR1OP2	ENSG00000111790	con72	vir_par72	OK	23.0308	53.853	1.22546	2.3383	3.9212	5e-05	0.000280515	yes
ODC1	ENSG00000115758	con72	vir_par72	OK	182.686	427.155	1.22539	2.33819	4.09042	5e-05	0.000280515	yes
PPP4R1L	ENSG00000124224	con72	vir_par72	OK	4.29649	10.0455	1.22532	2.33807	2.12291	5e-05	0.000280515	yes
RP11-23F23.3	ENSG00000255387	con72	vir_par72	OK	1.29425	3.02584	1.22521	2.33789	2.27976	5e-05	0.000280515	yes
JAG1	ENSG00000101384	con72	vir_par72	OK	36.1767	84.5501	1.22475	2.33715	4.35733	5e-05	0.000280515	yes
UHRF1BP1	ENSG00000065060	con72	vir_par72	OK	15.7819	36.8573	1.22368	2.33542	3.87487	5e-05	0.000280515	yes
GLRX2	ENSG00000023572	con72	vir_par72	OK	6.36289	14.8545	1.22315	2.33456	2.46266	5e-05	0.000280515	yes
HSPA14	ENSG00000187522	con72	vir_par72	OK	24.3548	56.8362	1.22261	2.33369	3.34484	5e-05	0.000280515	yes
EXOSC6	ENSG00000223496	con72	vir_par72	OK	7.42949	17.3312	1.22203	2.33275	2.96885	5e-05	0.000280515	yes
KIAA0947	ENSG00000164151	con72	vir_par72	OK	9.6003	22.3898	1.22169	2.3322	3.19302	5e-05	0.000280515	yes
ESCO1	ENSG00000141446	con72	vir_par72	OK	15.2062	35.4606	1.22156	2.33199	4.07039	5e-05	0.000280515	yes
AC124861.1	ENSG00000227479	con72	vir_par72	OK	0.76333	1.77986	1.22139	2.33171	1.06441	0.0146	0.0472196	yes
TEC	ENSG00000135605	con72	vir_par72	OK	3.80157	8.8611	1.22089	2.3309	2.65371	5e-05	0.000280515	yes
CLN8	ENSG00000182372	con72	vir_par72	OK	17.4284	40.6216	1.22081	2.33078	1.91747	5e-05	0.000280515	yes
KB-1460A1.5	ENSG00000261087	con72	vir_par72	OK	1.08012	2.51747	1.22079	2.33074	2.33285	5e-05	0.000280515	yes
BCL3	ENSG00000069399	con72	vir_par72	OK	4.45943	10.3832	1.21932	2.32837	2.20518	5e-05	0.000280515	yes
CALR	ENSG00000179218	con72	vir_par72	OK	317.733	739.755	1.21923	2.32822	3.75122	5e-05	0.000280515	yes
TRAFD1	ENSG00000135148	con72	vir_par72	OK	17.0582	39.7135	1.21917	2.32813	2.7944	5e-05	0.000280515	yes
DVL3	ENSG00000161202	con72	vir_par72	OK	11.9955	27.9261	1.21912	2.32805	0.874339	0.0082	0.028747	yes
ABCF2	ENSG00000033050	con72	vir_par72	OK	32.1147	74.7488	1.21882	2.32756	3.12284	5e-05	0.000280515	yes
RPP38	ENSG00000152464	con72	vir_par72	OK	15.4935	36.0501	1.21834	2.32679	2.07612	5e-05	0.000280515	yes
ANKS1A	ENSG00000064999	con72	vir_par72	OK	6.84124	15.9175	1.21829	2.32671	3.75819	5e-05	0.000280515	yes
ETS2	ENSG00000157557	con72	vir_par72	OK	37.5315	87.3175	1.21817	2.32651	4.04465	5e-05	0.000280515	yes
LMTK2	ENSG00000164715	con72	vir_par72	OK	7.37216	17.1335	1.21666	2.32408	4.04244	5e-05	0.000280515	yes
ABHD17B	ENSG00000107362	con72	vir_par72	OK	16.9384	39.3595	1.21641	2.32368	3.64774	5e-05	0.000280515	yes
TRMT44	ENSG00000155275	con72	vir_par72	OK	5.04543	11.7086	1.21452	2.32064	1.9807	5e-05	0.000280515	yes
NBPF14	ENSG00000122497	con72	vir_par72	OK	0.843412	1.95694	1.21429	2.32027	2.29011	5e-05	0.000280515	yes
RDH13	ENSG00000160439	con72	vir_par72	OK	11.2231	26.0322	1.21382	2.31951	2.3861	5e-05	0.000280515	yes
F11R	ENSG00000158769	con72	vir_par72	OK	66.495	154.193	1.21342	2.31887	2.55508	5e-05	0.000280515	yes
TCEAL3	ENSG00000196507	con72	vir_par72	OK	7.92959	18.3767	1.21256	2.31748	2.43469	5e-05	0.000280515	yes
PRMT5	ENSG00000100462	con72	vir_par72	OK	110.512	255.969	1.21177	2.31622	3.06738	5e-05	0.000280515	yes
OAZ1	ENSG00000104904	con72	vir_par72	OK	164.592	381.192	1.21163	2.31599	4.08013	5e-05	0.000280515	yes
CCNT2	ENSG00000082258	con72	vir_par72	OK	22.6628	52.4715	1.21121	2.31532	3.11709	5e-05	0.000280515	yes
TOMM34	ENSG00000025772	con72	vir_par72	OK	26.2007	60.6599	1.21114	2.31521	3.13678	5e-05	0.000280515	yes
SNAPC1	ENSG00000023608	con72	vir_par72	OK	13.1611	30.4648	1.21086	2.31476	1.83388	0.0001	0.000538822	yes
ATP6V0B	ENSG00000117410	con72	vir_par72	OK	61.8295	143.118	1.21084	2.31472	3.57926	5e-05	0.000280515	yes
RP11-71H17.9	ENSG00000272947	con72	vir_par72	OK	1.70707	3.94914	1.21002	2.31341	1.88266	5e-05	0.000280515	yes
ZNF768	ENSG00000169957	con72	vir_par72	OK	19.7036	45.5792	1.20992	2.31325	3.33662	5e-05	0.000280515	yes
DPH7	ENSG00000148399	con72	vir_par72	OK	16.0258	37.0615	1.20953	2.31262	2.95032	5e-05	0.000280515	yes
RNF103	ENSG00000239305	con72	vir_par72	OK	27.4474	63.4603	1.20918	2.31206	1.64122	0.0003	0.00148912	yes
RDX	ENSG00000137710	con72	vir_par72	OK	23.3359	53.9319	1.20859	2.31112	3.18791	5e-05	0.000280515	yes
EPB41L4A-AS1	ENSG00000224032	con72	vir_par72	OK	30.7177	70.9852	1.20845	2.31089	2.01141	5e-05	0.000280515	yes
AC093838.4	ENSG00000152117	con72	vir_par72	OK	5.94082	13.7212	1.20767	2.30964	2.12334	5e-05	0.000280515	yes
ISG20L2	ENSG00000143319	con72	vir_par72	OK	33.1769	76.624	1.20762	2.30956	1.98798	5e-05	0.000280515	yes
PRRC2C	ENSG00000117523	con72	vir_par72	OK	39.8528	92.0376	1.20754	2.30944	2.05603	5e-05	0.000280515	yes
PNPT1P1	ENSG00000229241	con72	vir_par72	OK	2.0951	4.83635	1.2069	2.30841	1.34273	0.00585	0.0214125	yes
TRIM37	ENSG00000108395	con72	vir_par72	OK	16.7249	38.6048	1.20678	2.30822	2.1937	5e-05	0.000280515	yes
WDR43	ENSG00000163811	con72	vir_par72	OK	44.2391	102.109	1.20672	2.30812	3.56773	5e-05	0.000280515	yes
KDELR3	ENSG00000100196	con72	vir_par72	OK	45.1618	104.235	1.20667	2.30804	1.02925	0.0108	0.036473	yes
WSB2	ENSG00000176871	con72	vir_par72	OK	64.8803	149.672	1.20595	2.30689	3.74415	5e-05	0.000280515	yes
LYPD3	ENSG00000124466	con72	vir_par72	OK	1.88307	4.34366	1.20582	2.30668	2.1291	5e-05	0.000280515	yes
DPP9	ENSG00000142002	con72	vir_par72	OK	7.51971	17.3374	1.20514	2.3056	2.44414	5e-05	0.000280515	yes
DDIT3	ENSG00000175197	con72	vir_par72	OK	210.447	485.205	1.20514	2.3056	2.14821	5e-05	0.000280515	yes
TET3	ENSG00000187605	con72	vir_par72	OK	4.82779	11.1297	1.20498	2.30534	3.68367	5e-05	0.000280515	yes
PITPNM2	ENSG00000090975	con72	vir_par72	OK	1.90186	4.38277	1.20444	2.30448	1.31364	0.0008	0.00363136	yes
UBASH3B	ENSG00000154127	con72	vir_par72	OK	3.32776	7.66587	1.2039	2.30362	2.84933	5e-05	0.000280515	yes
ECM1	ENSG00000143369	con72	vir_par72	OK	1.15324	2.65595	1.20353	2.30302	1.65512	5e-05	0.000280515	yes
MAP2K4	ENSG00000065559	con72	vir_par72	OK	19.6563	45.2662	1.20344	2.30288	3.10021	5e-05	0.000280515	yes
CHPF2	ENSG00000033100	con72	vir_par72	OK	5.12053	11.7903	1.20324	2.30256	2.30867	5e-05	0.000280515	yes
ZNF146	ENSG00000167635	con72	vir_par72	OK	127.286	292.984	1.20275	2.30178	2.4453	5e-05	0.000280515	yes
ARHGAP12	ENSG00000165322	con72	vir_par72	OK	26.3909	60.7237	1.20222	2.30093	3.25704	5e-05	0.000280515	yes
POLR3A	ENSG00000148606	con72	vir_par72	OK	7.76399	17.8604	1.20189	2.30041	3.26935	5e-05	0.000280515	yes
[truncated: 4,702 more rows]
