# Supplementary material for: Gene expression profile of HCT-8 cells following single or co-infections with Cryptosporidium parvum and bovine coronavirus
Source: Research Square preprint supplement (doi:10.21203/rs.3.rs-2673942/v1), 2023-03-23
Supplement: Supplementary file 10 [file c66f6969304b13c4853472a4.xlsx]

## Sheet: Cntrl_vs_Crypto_24h_Bio_process
Supplementary table S6: Results from the Gene Ontology (GO) analysis in the category for biological process complete (GObp) and Pathway Enrichment (KEGG pathways) in Cryptosporidium parvum infected cells at 24 hpi.
#term ID	term description	observed gene count	background gene count	strength	false discovery rate	matching proteins in your network (IDs)	matching proteins in your network (labels)
GO:0006119	oxidative phosphorylation	11	100	2.01	3.33e-17	9606.ENSP00000354499,9606.ENSP00000354554,9606.ENSP00000354632,9606.ENSP00000354687,9606.ENSP00000354728,9606.ENSP00000354813,9606.ENSP00000354876,9606.ENSP00000354961,9606.ENSP00000355046,9606.ENSP00000355206,9606.ENSP00000355265	MT-CO1,MT-CYB,MT-ATP6,MT-ND1,MT-ND4L,MT-ND5,MT-CO2,MT-ND4,MT-ND2,MT-ND3,MT-ATP8
GO:0022904	respiratory electron transport chain	10	96	1.99	1.99e-15	9606.ENSP00000354499,9606.ENSP00000354554,9606.ENSP00000354687,9606.ENSP00000354728,9606.ENSP00000354813,9606.ENSP00000354876,9606.ENSP00000354961,9606.ENSP00000354982,9606.ENSP00000355046,9606.ENSP00000355206	MT-CO1,MT-CYB,MT-ND1,MT-ND4L,MT-ND5,MT-CO2,MT-ND4,MT-CO3,MT-ND2,MT-ND3
GO:0009167	purine ribonucleoside monophosphate metabolic process	11	230	1.65	2.63e-14	9606.ENSP00000354499,9606.ENSP00000354554,9606.ENSP00000354632,9606.ENSP00000354687,9606.ENSP00000354728,9606.ENSP00000354813,9606.ENSP00000354876,9606.ENSP00000354961,9606.ENSP00000355046,9606.ENSP00000355206,9606.ENSP00000355265	MT-CO1,MT-CYB,MT-ATP6,MT-ND1,MT-ND4L,MT-ND5,MT-CO2,MT-ND4,MT-ND2,MT-ND3,MT-ATP8
GO:0009205	purine ribonucleoside triphosphate metabolic process	11	221	1.67	2.63e-14	9606.ENSP00000354499,9606.ENSP00000354554,9606.ENSP00000354632,9606.ENSP00000354687,9606.ENSP00000354728,9606.ENSP00000354813,9606.ENSP00000354876,9606.ENSP00000354961,9606.ENSP00000355046,9606.ENSP00000355206,9606.ENSP00000355265	MT-CO1,MT-CYB,MT-ATP6,MT-ND1,MT-ND4L,MT-ND5,MT-CO2,MT-ND4,MT-ND2,MT-ND3,MT-ATP8
GO:0042775	mitochondrial ATP synthesis coupled electron transport	9	78	2.03	2.63e-14	9606.ENSP00000354499,9606.ENSP00000354554,9606.ENSP00000354687,9606.ENSP00000354728,9606.ENSP00000354813,9606.ENSP00000354876,9606.ENSP00000354961,9606.ENSP00000355046,9606.ENSP00000355206	MT-CO1,MT-CYB,MT-ND1,MT-ND4L,MT-ND5,MT-CO2,MT-ND4,MT-ND2,MT-ND3
GO:0006091	generation of precursor metabolites and energy	12	400	1.45	8.42e-14	9606.ENSP00000354499,9606.ENSP00000354554,9606.ENSP00000354632,9606.ENSP00000354687,9606.ENSP00000354728,9606.ENSP00000354813,9606.ENSP00000354876,9606.ENSP00000354961,9606.ENSP00000354982,9606.ENSP00000355046,9606.ENSP00000355206,9606.ENSP00000355265	MT-CO1,MT-CYB,MT-ATP6,MT-ND1,MT-ND4L,MT-ND5,MT-CO2,MT-ND4,MT-CO3,MT-ND2,MT-ND3,MT-ATP8
GO:0009150	purine ribonucleotide metabolic process	11	425	1.38	8e-12	9606.ENSP00000354499,9606.ENSP00000354554,9606.ENSP00000354632,9606.ENSP00000354687,9606.ENSP00000354728,9606.ENSP00000354813,9606.ENSP00000354876,9606.ENSP00000354961,9606.ENSP00000355046,9606.ENSP00000355206,9606.ENSP00000355265	MT-CO1,MT-CYB,MT-ATP6,MT-ND1,MT-ND4L,MT-ND5,MT-CO2,MT-ND4,MT-ND2,MT-ND3,MT-ATP8
GO:0017144	drug metabolic process	11	622	1.22	3.29e-10	9606.ENSP00000354499,9606.ENSP00000354554,9606.ENSP00000354632,9606.ENSP00000354687,9606.ENSP00000354728,9606.ENSP00000354813,9606.ENSP00000354876,9606.ENSP00000354961,9606.ENSP00000355046,9606.ENSP00000355206,9606.ENSP00000355265	MT-CO1,MT-CYB,MT-ATP6,MT-ND1,MT-ND4L,MT-ND5,MT-CO2,MT-ND4,MT-ND2,MT-ND3,MT-ATP8
GO:0006120	mitochondrial electron transport, NADH to ubiquinone	6	44	2.1	3.49e-10	9606.ENSP00000354687,9606.ENSP00000354728,9606.ENSP00000354813,9606.ENSP00000354961,9606.ENSP00000355046,9606.ENSP00000355206	MT-ND1,MT-ND4L,MT-ND5,MT-ND4,MT-ND2,MT-ND3
GO:0055114	oxidation-reduction process	12	932	1.08	8.75e-10	9606.ENSP00000241337,9606.ENSP00000354499,9606.ENSP00000354554,9606.ENSP00000354665,9606.ENSP00000354687,9606.ENSP00000354728,9606.ENSP00000354813,9606.ENSP00000354876,9606.ENSP00000354961,9606.ENSP00000354982,9606.ENSP00000355046,9606.ENSP00000355206	GSTM2,MT-CO1,MT-CYB,MT-ND6,MT-ND1,MT-ND4L,MT-ND5,MT-CO2,MT-ND4,MT-CO3,MT-ND2,MT-ND3
GO:0032981	mitochondrial respiratory chain complex I assembly	6	65	1.93	2.79e-09	9606.ENSP00000354665,9606.ENSP00000354687,9606.ENSP00000354813,9606.ENSP00000354961,9606.ENSP00000355046,9606.ENSP00000355206	MT-ND6,MT-ND1,MT-ND5,MT-ND4,MT-ND2,MT-ND3
GO:0007005	mitochondrion organization	9	424	1.3	7.4e-09	9606.ENSP00000354632,9606.ENSP00000354665,9606.ENSP00000354687,9606.ENSP00000354813,9606.ENSP00000354961,9606.ENSP00000355046,9606.ENSP00000355206,9606.ENSP00000355265,9606.ENSP00000360266	MT-ATP6,MT-ND6,MT-ND1,MT-ND5,MT-ND4,MT-ND2,MT-ND3,MT-ATP8,JUN
GO:1902600	proton transmembrane transport	6	137	1.61	1.64e-07	9606.ENSP00000354499,9606.ENSP00000354554,9606.ENSP00000354632,9606.ENSP00000354876,9606.ENSP00000354982,9606.ENSP00000355265	MT-CO1,MT-CYB,MT-ATP6,MT-CO2,MT-CO3,MT-ATP8
GO:0044281	small molecule metabolic process	12	1779	0.8	1.02e-06	9606.ENSP00000241337,9606.ENSP00000354499,9606.ENSP00000354554,9606.ENSP00000354632,9606.ENSP00000354687,9606.ENSP00000354728,9606.ENSP00000354813,9606.ENSP00000354876,9606.ENSP00000354961,9606.ENSP00000355046,9606.ENSP00000355206,9606.ENSP00000355265	GSTM2,MT-CO1,MT-CYB,MT-ATP6,MT-ND1,MT-ND4L,MT-ND5,MT-CO2,MT-ND4,MT-ND2,MT-ND3,MT-ATP8
GO:0019646	aerobic electron transport chain	3	16	2.24	2.28e-05	9606.ENSP00000354499,9606.ENSP00000354876,9606.ENSP00000354982	MT-CO1,MT-CO2,MT-CO3
GO:0006979	response to oxidative stress	6	373	1.18	4.67e-05	9606.ENSP00000354499,9606.ENSP00000354665,9606.ENSP00000354687,9606.ENSP00000354813,9606.ENSP00000355206,9606.ENSP00000360266	MT-CO1,MT-ND6,MT-ND1,MT-ND5,MT-ND3,JUN
GO:0015990	electron transport coupled proton transport	2	2	2.97	0.00013	9606.ENSP00000354499,9606.ENSP00000354554	MT-CO1,MT-CYB
GO:0006725	cellular aromatic compound metabolic process	15	4754	0.47	0.00014	9606.ENSP00000241337,9606.ENSP00000242480,9606.ENSP00000353491,9606.ENSP00000354499,9606.ENSP00000354554,9606.ENSP00000354632,9606.ENSP00000354687,9606.ENSP00000354728,9606.ENSP00000354813,9606.ENSP00000354876,9606.ENSP00000354961,9606.ENSP00000355046,9606.ENSP00000355206,9606.ENSP00000355265,9606.ENSP00000360266	GSTM2,EGR2,ZNF460,MT-CO1,MT-CYB,MT-ATP6,MT-ND1,MT-ND4L,MT-ND5,MT-CO2,MT-ND4,MT-ND2,MT-ND3,MT-ATP8,JUN
GO:0009628	response to abiotic stimulus	8	1052	0.85	0.00015	9606.ENSP00000354499,9606.ENSP00000354554,9606.ENSP00000354632,9606.ENSP00000354813,9606.ENSP00000354876,9606.ENSP00000354961,9606.ENSP00000355206,9606.ENSP00000360266	MT-CO1,MT-CYB,MT-ATP6,MT-ND5,MT-CO2,MT-ND4,MT-ND3,JUN
GO:0009636	response to toxic substance	6	468	1.08	0.00015	9606.ENSP00000241337,9606.ENSP00000354554,9606.ENSP00000354665,9606.ENSP00000354813,9606.ENSP00000354961,9606.ENSP00000360266	GSTM2,MT-CYB,MT-ND6,MT-ND5,MT-ND4,JUN
GO:1901360	organic cyclic compound metabolic process	15	4963	0.45	0.00023	9606.ENSP00000241337,9606.ENSP00000242480,9606.ENSP00000353491,9606.ENSP00000354499,9606.ENSP00000354554,9606.ENSP00000354632,9606.ENSP00000354687,9606.ENSP00000354728,9606.ENSP00000354813,9606.ENSP00000354876,9606.ENSP00000354961,9606.ENSP00000355046,9606.ENSP00000355206,9606.ENSP00000355265,9606.ENSP00000360266	GSTM2,EGR2,ZNF460,MT-CO1,MT-CYB,MT-ATP6,MT-ND1,MT-ND4L,MT-ND5,MT-CO2,MT-ND4,MT-ND2,MT-ND3,MT-ATP8,JUN
GO:0046677	response to antibiotic	5	305	1.18	0.00028	9606.ENSP00000354554,9606.ENSP00000354665,9606.ENSP00000354813,9606.ENSP00000354961,9606.ENSP00000360266	MT-CYB,MT-ND6,MT-ND5,MT-ND4,JUN
GO:0034622	cellular protein-containing complex assembly	7	832	0.89	0.00031	9606.ENSP00000354665,9606.ENSP00000354687,9606.ENSP00000354813,9606.ENSP00000354961,9606.ENSP00000354982,9606.ENSP00000355046,9606.ENSP00000355206	MT-ND6,MT-ND1,MT-ND5,MT-ND4,MT-CO3,MT-ND2,MT-ND3
GO:0034641	cellular nitrogen compound metabolic process	15	5126	0.44	0.00033	9606.ENSP00000241337,9606.ENSP00000242480,9606.ENSP00000353491,9606.ENSP00000354499,9606.ENSP00000354554,9606.ENSP00000354632,9606.ENSP00000354687,9606.ENSP00000354728,9606.ENSP00000354813,9606.ENSP00000354876,9606.ENSP00000354961,9606.ENSP00000355046,9606.ENSP00000355206,9606.ENSP00000355265,9606.ENSP00000360266	GSTM2,EGR2,ZNF460,MT-CO1,MT-CYB,MT-ATP6,MT-ND1,MT-ND4L,MT-ND5,MT-CO2,MT-ND4,MT-ND2,MT-ND3,MT-ATP8,JUN
GO:0014070	response to organic cyclic compound	7	873	0.87	0.0004	9606.ENSP00000241337,9606.ENSP00000338330,9606.ENSP00000354554,9606.ENSP00000354665,9606.ENSP00000354687,9606.ENSP00000355206,9606.ENSP00000360266	GSTM2,PAQR6,MT-CYB,MT-ND6,MT-ND1,MT-ND3,JUN
GO:1901564	organonitrogen compound metabolic process	15	5281	0.42	0.00046	9606.ENSP00000241337,9606.ENSP00000242480,9606.ENSP00000314560,9606.ENSP00000314608,9606.ENSP00000354499,9606.ENSP00000354554,9606.ENSP00000354632,9606.ENSP00000354687,9606.ENSP00000354728,9606.ENSP00000354813,9606.ENSP00000354876,9606.ENSP00000354961,9606.ENSP00000355046,9606.ENSP00000355206,9606.ENSP00000355265	GSTM2,EGR2,MAP6D1,KLHL11,MT-CO1,MT-CYB,MT-ATP6,MT-ND1,MT-ND4L,MT-ND5,MT-CO2,MT-ND4,MT-ND2,MT-ND3,MT-ATP8
GO:0006139	nucleobase-containing compound metabolic process	14	4551	0.46	0.00047	9606.ENSP00000242480,9606.ENSP00000353491,9606.ENSP00000354499,9606.ENSP00000354554,9606.ENSP00000354632,9606.ENSP00000354687,9606.ENSP00000354728,9606.ENSP00000354813,9606.ENSP00000354876,9606.ENSP00000354961,9606.ENSP00000355046,9606.ENSP00000355206,9606.ENSP00000355265,9606.ENSP00000360266	EGR2,ZNF460,MT-CO1,MT-CYB,MT-ATP6,MT-ND1,MT-ND4L,MT-ND5,MT-CO2,MT-ND4,MT-ND2,MT-ND3,MT-ATP8,JUN
GO:0042493	response to drug	7	900	0.86	0.00047	9606.ENSP00000241337,9606.ENSP00000354554,9606.ENSP00000354665,9606.ENSP00000354687,9606.ENSP00000354813,9606.ENSP00000354961,9606.ENSP00000360266	GSTM2,MT-CYB,MT-ND6,MT-ND1,MT-ND5,MT-ND4,JUN
GO:0008152	metabolic process	19	9569	0.27	0.0011	9606.ENSP00000241337,9606.ENSP00000242480,9606.ENSP00000314560,9606.ENSP00000314608,9606.ENSP00000353491,9606.ENSP00000354499,9606.ENSP00000354554,9606.ENSP00000354632,9606.ENSP00000354665,9606.ENSP00000354687,9606.ENSP00000354728,9606.ENSP00000354813,9606.ENSP00000354876,9606.ENSP00000354961,9606.ENSP00000354982,9606.ENSP00000355046,9606.ENSP00000355206,9606.ENSP00000355265,9606.ENSP00000360266	GSTM2,EGR2,MAP6D1,KLHL11,ZNF460,MT-CO1,MT-CYB,MT-ATP6,MT-ND6,MT-ND1,MT-ND4L,MT-ND5,MT-CO2,MT-ND4,MT-CO3,MT-ND2,MT-ND3,MT-ATP8,JUN
GO:0006996	organelle organization	11	3131	0.51	0.0018	9606.ENSP00000314560,9606.ENSP00000352627,9606.ENSP00000354632,9606.ENSP00000354665,9606.ENSP00000354687,9606.ENSP00000354813,9606.ENSP00000354961,9606.ENSP00000355046,9606.ENSP00000355206,9606.ENSP00000355265,9606.ENSP00000360266	MAP6D1,HIST1H2AM,MT-ATP6,MT-ND6,MT-ND1,MT-ND5,MT-ND4,MT-ND2,MT-ND3,MT-ATP8,JUN
GO:0006123	mitochondrial electron transport, cytochrome c to oxygen	2	15	2.09	0.002	9606.ENSP00000354499,9606.ENSP00000354876	MT-CO1,MT-CO2
GO:0007568	aging	4	255	1.16	0.002	9606.ENSP00000354499,9606.ENSP00000354632,9606.ENSP00000354961,9606.ENSP00000360266	MT-CO1,MT-ATP6,MT-ND4,JUN
GO:0010035	response to inorganic substance	5	491	0.98	0.002	9606.ENSP00000354499,9606.ENSP00000354554,9606.ENSP00000354665,9606.ENSP00000354813,9606.ENSP00000360266	MT-CO1,MT-CYB,MT-ND6,MT-ND5,JUN
GO:0044237	cellular metabolic process	18	8797	0.28	0.002	9606.ENSP00000241337,9606.ENSP00000242480,9606.ENSP00000314560,9606.ENSP00000314608,9606.ENSP00000353491,9606.ENSP00000354499,9606.ENSP00000354554,9606.ENSP00000354632,9606.ENSP00000354687,9606.ENSP00000354728,9606.ENSP00000354813,9606.ENSP00000354876,9606.ENSP00000354961,9606.ENSP00000354982,9606.ENSP00000355046,9606.ENSP00000355206,9606.ENSP00000355265,9606.ENSP00000360266	GSTM2,EGR2,MAP6D1,KLHL11,ZNF460,MT-CO1,MT-CYB,MT-ATP6,MT-ND1,MT-ND4L,MT-ND5,MT-CO2,MT-ND4,MT-CO3,MT-ND2,MT-ND3,MT-ATP8,JUN
GO:0006950	response to stress	11	3267	0.5	0.0024	9606.ENSP00000241337,9606.ENSP00000354499,9606.ENSP00000354554,9606.ENSP00000354632,9606.ENSP00000354665,9606.ENSP00000354687,9606.ENSP00000354813,9606.ENSP00000354876,9606.ENSP00000354961,9606.ENSP00000355206,9606.ENSP00000360266	GSTM2,MT-CO1,MT-CYB,MT-ATP6,MT-ND6,MT-ND1,MT-ND5,MT-CO2,MT-ND4,MT-ND3,JUN
GO:0042776	mitochondrial ATP synthesis coupled proton transport	2	17	2.04	0.0024	9606.ENSP00000354632,9606.ENSP00000355265	MT-ATP6,MT-ATP8
GO:0010243	response to organonitrogen compound	6	876	0.8	0.003	9606.ENSP00000241337,9606.ENSP00000242480,9606.ENSP00000354554,9606.ENSP00000354665,9606.ENSP00000354813,9606.ENSP00000360266	GSTM2,EGR2,MT-CYB,MT-ND6,MT-ND5,JUN
GO:0042542	response to hydrogen peroxide	3	112	1.4	0.003	9606.ENSP00000354665,9606.ENSP00000354813,9606.ENSP00000360266	MT-ND6,MT-ND5,JUN
GO:0055093	response to hyperoxia	2	21	1.95	0.0033	9606.ENSP00000354554,9606.ENSP00000354632	MT-CYB,MT-ATP6
GO:0010033	response to organic substance	10	2815	0.52	0.0035	9606.ENSP00000241337,9606.ENSP00000242480,9606.ENSP00000338330,9606.ENSP00000354554,9606.ENSP00000354665,9606.ENSP00000354687,9606.ENSP00000354813,9606.ENSP00000354961,9606.ENSP00000355206,9606.ENSP00000360266	GSTM2,EGR2,PAQR6,MT-CYB,MT-ND6,MT-ND1,MT-ND5,MT-ND4,MT-ND3,JUN
GO:0070482	response to oxygen levels	4	321	1.06	0.0041	9606.ENSP00000354554,9606.ENSP00000354632,9606.ENSP00000354813,9606.ENSP00000354961	MT-CYB,MT-ATP6,MT-ND5,MT-ND4
GO:0006807	nitrogen compound metabolic process	17	8349	0.28	0.0046	9606.ENSP00000241337,9606.ENSP00000242480,9606.ENSP00000314560,9606.ENSP00000314608,9606.ENSP00000353491,9606.ENSP00000354499,9606.ENSP00000354554,9606.ENSP00000354632,9606.ENSP00000354687,9606.ENSP00000354728,9606.ENSP00000354813,9606.ENSP00000354876,9606.ENSP00000354961,9606.ENSP00000355046,9606.ENSP00000355206,9606.ENSP00000355265,9606.ENSP00000360266	GSTM2,EGR2,MAP6D1,KLHL11,ZNF460,MT-CO1,MT-CYB,MT-ATP6,MT-ND1,MT-ND4L,MT-ND5,MT-CO2,MT-ND4,MT-ND2,MT-ND3,MT-ATP8,JUN
GO:0030902	hindbrain development	3	144	1.29	0.0052	9606.ENSP00000242480,9606.ENSP00000354499,9606.ENSP00000354961	EGR2,MT-CO1,MT-ND4
GO:0046688	response to copper ion	2	28	1.82	0.0052	9606.ENSP00000354499,9606.ENSP00000354554	MT-CO1,MT-CYB
GO:1901700	response to oxygen-containing compound	7	1427	0.66	0.0053	9606.ENSP00000242480,9606.ENSP00000354554,9606.ENSP00000354665,9606.ENSP00000354687,9606.ENSP00000354813,9606.ENSP00000354961,9606.ENSP00000360266	EGR2,MT-CYB,MT-ND6,MT-ND1,MT-ND5,MT-ND4,JUN
GO:0042407	cristae formation	2	31	1.78	0.0057	9606.ENSP00000354632,9606.ENSP00000355265	MT-ATP6,MT-ATP8
GO:0016043	cellular component organization	13	5163	0.37	0.0066	9606.ENSP00000242480,9606.ENSP00000314560,9606.ENSP00000352627,9606.ENSP00000354632,9606.ENSP00000354665,9606.ENSP00000354687,9606.ENSP00000354813,9606.ENSP00000354961,9606.ENSP00000354982,9606.ENSP00000355046,9606.ENSP00000355206,9606.ENSP00000355265,9606.ENSP00000360266	EGR2,MAP6D1,HIST1H2AM,MT-ATP6,MT-ND6,MT-ND1,MT-ND5,MT-ND4,MT-CO3,MT-ND2,MT-ND3,MT-ATP8,JUN
GO:0044238	primary metabolic process	17	8808	0.25	0.0083	9606.ENSP00000241337,9606.ENSP00000242480,9606.ENSP00000314560,9606.ENSP00000314608,9606.ENSP00000353491,9606.ENSP00000354499,9606.ENSP00000354554,9606.ENSP00000354632,9606.ENSP00000354687,9606.ENSP00000354728,9606.ENSP00000354813,9606.ENSP00000354876,9606.ENSP00000354961,9606.ENSP00000355046,9606.ENSP00000355206,9606.ENSP00000355265,9606.ENSP00000360266	GSTM2,EGR2,MAP6D1,KLHL11,ZNF460,MT-CO1,MT-CYB,MT-ATP6,MT-ND1,MT-ND4L,MT-ND5,MT-CO2,MT-ND4,MT-ND2,MT-ND3,MT-ATP8,JUN
GO:0035094	response to nicotine	2	49	1.58	0.0126	9606.ENSP00000354665,9606.ENSP00000354961	MT-ND6,MT-ND4
GO:0071704	organic substance metabolic process	17	9135	0.24	0.0131	9606.ENSP00000241337,9606.ENSP00000242480,9606.ENSP00000314560,9606.ENSP00000314608,9606.ENSP00000353491,9606.ENSP00000354499,9606.ENSP00000354554,9606.ENSP00000354632,9606.ENSP00000354687,9606.ENSP00000354728,9606.ENSP00000354813,9606.ENSP00000354876,9606.ENSP00000354961,9606.ENSP00000355046,9606.ENSP00000355206,9606.ENSP00000355265,9606.ENSP00000360266	GSTM2,EGR2,MAP6D1,KLHL11,ZNF460,MT-CO1,MT-CYB,MT-ATP6,MT-ND1,MT-ND4L,MT-ND5,MT-CO2,MT-ND4,MT-ND2,MT-ND3,MT-ATP8,JUN
GO:0042221	response to chemical	11	4153	0.39	0.0148	9606.ENSP00000241337,9606.ENSP00000242480,9606.ENSP00000338330,9606.ENSP00000354499,9606.ENSP00000354554,9606.ENSP00000354665,9606.ENSP00000354687,9606.ENSP00000354813,9606.ENSP00000354961,9606.ENSP00000355206,9606.ENSP00000360266	GSTM2,EGR2,PAQR6,MT-CO1,MT-CYB,MT-ND6,MT-ND1,MT-ND5,MT-ND4,MT-ND3,JUN
GO:0046686	response to cadmium ion	2	56	1.52	0.0156	9606.ENSP00000354554,9606.ENSP00000360266	MT-CYB,JUN
GO:0009725	response to hormone	5	854	0.74	0.0161	9606.ENSP00000242480,9606.ENSP00000338330,9606.ENSP00000354554,9606.ENSP00000355206,9606.ENSP00000360266	EGR2,PAQR6,MT-CYB,MT-ND3,JUN
GO:0009987	cellular process	21	14652	0.13	0.0199	9606.ENSP00000241337,9606.ENSP00000242480,9606.ENSP00000314560,9606.ENSP00000314608,9606.ENSP00000338330,9606.ENSP00000352627,9606.ENSP00000353491,9606.ENSP00000354499,9606.ENSP00000354554,9606.ENSP00000354632,9606.ENSP00000354665,9606.ENSP00000354687,9606.ENSP00000354728,9606.ENSP00000354813,9606.ENSP00000354876,9606.ENSP00000354961,9606.ENSP00000354982,9606.ENSP00000355046,9606.ENSP00000355206,…	GSTM2,EGR2,MAP6D1,KLHL11,PAQR6,HIST1H2AM,ZNF460,MT-CO1,MT-CYB,MT-ATP6,MT-ND6,MT-ND1,MT-ND4L,MT-ND5,MT-CO2,MT-ND4,MT-CO3,MT-ND2,MT-ND3,MT-ATP8,JUN
GO:0009719	response to endogenous stimulus	6	1353	0.62	0.0206	9606.ENSP00000241337,9606.ENSP00000242480,9606.ENSP00000338330,9606.ENSP00000354554,9606.ENSP00000355206,9606.ENSP00000360266	GSTM2,EGR2,PAQR6,MT-CYB,MT-ND3,JUN
GO:0001666	response to hypoxia	3	288	0.99	0.0295	9606.ENSP00000354554,9606.ENSP00000354813,9606.ENSP00000354961	MT-CYB,MT-ND5,MT-ND4
GO:0021549	cerebellum development	2	96	1.29	0.0385	9606.ENSP00000354499,9606.ENSP00000354961	MT-CO1,MT-ND4
GO:0009168	purine ribonucleoside monophosphate biosynthetic process	2	98	1.28	0.0397	9606.ENSP00000354632,9606.ENSP00000355265	MT-ATP6,MT-ATP8
GO:0010038	response to metal ion	3	339	0.92	0.0426	9606.ENSP00000354499,9606.ENSP00000354554,9606.ENSP00000360266	MT-CO1,MT-CYB,JUN
GO:0043279	response to alkaloid	2	106	1.25	0.044	9606.ENSP00000241337,9606.ENSP00000354665	GSTM2,MT-ND6

## Sheet: Cntrl_vs_Crypto_24h_KEGG
Supplementary table S6: Results from the Gene Ontology (GO) analysis in the category for biological process complete (GObp) and Pathway Enrichment (KEGG pathways) in Cryptosporidium parvum infected cells at 24 hpi.
#term ID	term description	observed gene count	background gene count	strength	false discovery rate	matching proteins in your network (IDs)	matching proteins in your network (labels)
hsa00190	Oxidative phosphorylation	13	131	1.97	1.26e-21	9606.ENSP00000354499,9606.ENSP00000354554,9606.ENSP00000354632,9606.ENSP00000354665,9606.ENSP00000354687,9606.ENSP00000354728,9606.ENSP00000354813,9606.ENSP00000354876,9606.ENSP00000354961,9606.ENSP00000354982,9606.ENSP00000355046,9606.ENSP00000355206,9606.ENSP00000355265	MT-CO1,MT-CYB,MT-ATP6,MT-ND6,MT-ND1,MT-ND4L,MT-ND5,MT-CO2,MT-ND4,MT-CO3,MT-ND2,MT-ND3,MT-ATP8
hsa05012	Parkinson's disease	13	142	1.93	1.71e-21	9606.ENSP00000354499,9606.ENSP00000354554,9606.ENSP00000354632,9606.ENSP00000354665,9606.ENSP00000354687,9606.ENSP00000354728,9606.ENSP00000354813,9606.ENSP00000354876,9606.ENSP00000354961,9606.ENSP00000354982,9606.ENSP00000355046,9606.ENSP00000355206,9606.ENSP00000355265	MT-CO1,MT-CYB,MT-ATP6,MT-ND6,MT-ND1,MT-ND4L,MT-ND5,MT-CO2,MT-ND4,MT-CO3,MT-ND2,MT-ND3,MT-ATP8
hsa04714	Thermogenesis	13	228	1.73	4.12e-19	9606.ENSP00000354499,9606.ENSP00000354554,9606.ENSP00000354632,9606.ENSP00000354665,9606.ENSP00000354687,9606.ENSP00000354728,9606.ENSP00000354813,9606.ENSP00000354876,9606.ENSP00000354961,9606.ENSP00000354982,9606.ENSP00000355046,9606.ENSP00000355206,9606.ENSP00000355265	MT-CO1,MT-CYB,MT-ATP6,MT-ND6,MT-ND1,MT-ND4L,MT-ND5,MT-CO2,MT-ND4,MT-CO3,MT-ND2,MT-ND3,MT-ATP8
hsa01100	Metabolic pathways	13	1250	0.99	6.08e-10	9606.ENSP00000354499,9606.ENSP00000354554,9606.ENSP00000354632,9606.ENSP00000354665,9606.ENSP00000354687,9606.ENSP00000354728,9606.ENSP00000354813,9606.ENSP00000354876,9606.ENSP00000354961,9606.ENSP00000354982,9606.ENSP00000355046,9606.ENSP00000355206,9606.ENSP00000355265	MT-CO1,MT-CYB,MT-ATP6,MT-ND6,MT-ND1,MT-ND4L,MT-ND5,MT-CO2,MT-ND4,MT-CO3,MT-ND2,MT-ND3,MT-ATP8
hsa04723	Retrograde endocannabinoid signaling	7	148	1.64	2.23e-09	9606.ENSP00000354665,9606.ENSP00000354687,9606.ENSP00000354728,9606.ENSP00000354813,9606.ENSP00000354961,9606.ENSP00000355046,9606.ENSP00000355206	MT-ND6,MT-ND1,MT-ND4L,MT-ND5,MT-ND4,MT-ND2,MT-ND3
hsa05010	Alzheimer's disease	6	168	1.52	2.26e-07	9606.ENSP00000354499,9606.ENSP00000354554,9606.ENSP00000354632,9606.ENSP00000354876,9606.ENSP00000354982,9606.ENSP00000355265	MT-CO1,MT-CYB,MT-ATP6,MT-CO2,MT-CO3,MT-ATP8
hsa05016	Huntington's disease	6	193	1.46	4.32e-07	9606.ENSP00000354499,9606.ENSP00000354554,9606.ENSP00000354632,9606.ENSP00000354876,9606.ENSP00000354982,9606.ENSP00000355265	MT-CO1,MT-CYB,MT-ATP6,MT-CO2,MT-CO3,MT-ATP8
hsa04932	Non-alcoholic fatty liver disease (NAFLD)	5	149	1.5	4.01e-06	9606.ENSP00000354499,9606.ENSP00000354554,9606.ENSP00000354876,9606.ENSP00000354982,9606.ENSP00000360266	MT-CO1,MT-CYB,MT-CO2,MT-CO3,JUN
hsa04260	Cardiac muscle contraction	4	76	1.69	1.01e-05	9606.ENSP00000354499,9606.ENSP00000354554,9606.ENSP00000354876,9606.ENSP00000354982	MT-CO1,MT-CYB,MT-CO2,MT-CO3

## Sheet: Cntrl_vs_Crypto_Bio_Up_24h
Supplementary table S6: Results from the Gene Ontology (GO) analysis in the category for biological process complete (GObp) and Pathway Enrichment (KEGG pathways) in Cryptosporidium parvum infected cells at 24 hpi.
#term ID	term description	observed gene count	background gene count	strength	false discovery rate	matching proteins in your network (IDs)	matching proteins in your network (labels)
GO:0006119	oxidative phosphorylation	11	100	2.1	1.12e-18	9606.ENSP00000354499,9606.ENSP00000354554,9606.ENSP00000354632,9606.ENSP00000354687,9606.ENSP00000354728,9606.ENSP00000354813,9606.ENSP00000354876,9606.ENSP00000354961,9606.ENSP00000355046,9606.ENSP00000355206,9606.ENSP00000355265	MT-CO1,MT-CYB,MT-ATP6,MT-ND1,MT-ND4L,MT-ND5,MT-CO2,MT-ND4,MT-ND2,MT-ND3,MT-ATP8
GO:0022904	respiratory electron transport chain	10	96	2.08	1.05e-16	9606.ENSP00000354499,9606.ENSP00000354554,9606.ENSP00000354687,9606.ENSP00000354728,9606.ENSP00000354813,9606.ENSP00000354876,9606.ENSP00000354961,9606.ENSP00000354982,9606.ENSP00000355046,9606.ENSP00000355206	MT-CO1,MT-CYB,MT-ND1,MT-ND4L,MT-ND5,MT-CO2,MT-ND4,MT-CO3,MT-ND2,MT-ND3
GO:0009205	purine ribonucleoside triphosphate metabolic process	11	221	1.76	1.18e-15	9606.ENSP00000354499,9606.ENSP00000354554,9606.ENSP00000354632,9606.ENSP00000354687,9606.ENSP00000354728,9606.ENSP00000354813,9606.ENSP00000354876,9606.ENSP00000354961,9606.ENSP00000355046,9606.ENSP00000355206,9606.ENSP00000355265	MT-CO1,MT-CYB,MT-ATP6,MT-ND1,MT-ND4L,MT-ND5,MT-CO2,MT-ND4,MT-ND2,MT-ND3,MT-ATP8
GO:0009167	purine ribonucleoside monophosphate metabolic process	11	230	1.74	1.25e-15	9606.ENSP00000354499,9606.ENSP00000354554,9606.ENSP00000354632,9606.ENSP00000354687,9606.ENSP00000354728,9606.ENSP00000354813,9606.ENSP00000354876,9606.ENSP00000354961,9606.ENSP00000355046,9606.ENSP00000355206,9606.ENSP00000355265	MT-CO1,MT-CYB,MT-ATP6,MT-ND1,MT-ND4L,MT-ND5,MT-CO2,MT-ND4,MT-ND2,MT-ND3,MT-ATP8
GO:0042775	mitochondrial ATP synthesis coupled electron transport	9	78	2.12	1.25e-15	9606.ENSP00000354499,9606.ENSP00000354554,9606.ENSP00000354687,9606.ENSP00000354728,9606.ENSP00000354813,9606.ENSP00000354876,9606.ENSP00000354961,9606.ENSP00000355046,9606.ENSP00000355206	MT-CO1,MT-CYB,MT-ND1,MT-ND4L,MT-ND5,MT-CO2,MT-ND4,MT-ND2,MT-ND3
GO:0006091	generation of precursor metabolites and energy	12	400	1.54	2.05e-15	9606.ENSP00000354499,9606.ENSP00000354554,9606.ENSP00000354632,9606.ENSP00000354687,9606.ENSP00000354728,9606.ENSP00000354813,9606.ENSP00000354876,9606.ENSP00000354961,9606.ENSP00000354982,9606.ENSP00000355046,9606.ENSP00000355206,9606.ENSP00000355265	MT-CO1,MT-CYB,MT-ATP6,MT-ND1,MT-ND4L,MT-ND5,MT-CO2,MT-ND4,MT-CO3,MT-ND2,MT-ND3,MT-ATP8
GO:0009150	purine ribonucleotide metabolic process	11	425	1.47	2.85e-13	9606.ENSP00000354499,9606.ENSP00000354554,9606.ENSP00000354632,9606.ENSP00000354687,9606.ENSP00000354728,9606.ENSP00000354813,9606.ENSP00000354876,9606.ENSP00000354961,9606.ENSP00000355046,9606.ENSP00000355206,9606.ENSP00000355265	MT-CO1,MT-CYB,MT-ATP6,MT-ND1,MT-ND4L,MT-ND5,MT-CO2,MT-ND4,MT-ND2,MT-ND3,MT-ATP8
GO:0017144	drug metabolic process	11	622	1.31	1.22e-11	9606.ENSP00000354499,9606.ENSP00000354554,9606.ENSP00000354632,9606.ENSP00000354687,9606.ENSP00000354728,9606.ENSP00000354813,9606.ENSP00000354876,9606.ENSP00000354961,9606.ENSP00000355046,9606.ENSP00000355206,9606.ENSP00000355265	MT-CO1,MT-CYB,MT-ATP6,MT-ND1,MT-ND4L,MT-ND5,MT-CO2,MT-ND4,MT-ND2,MT-ND3,MT-ATP8
GO:0055114	oxidation-reduction process	12	932	1.17	2.23e-11	9606.ENSP00000241337,9606.ENSP00000354499,9606.ENSP00000354554,9606.ENSP00000354665,9606.ENSP00000354687,9606.ENSP00000354728,9606.ENSP00000354813,9606.ENSP00000354876,9606.ENSP00000354961,9606.ENSP00000354982,9606.ENSP00000355046,9606.ENSP00000355206	GSTM2,MT-CO1,MT-CYB,MT-ND6,MT-ND1,MT-ND4L,MT-ND5,MT-CO2,MT-ND4,MT-CO3,MT-ND2,MT-ND3
GO:0006120	mitochondrial electron transport, NADH to ubiquinone	6	44	2.2	6.98e-11	9606.ENSP00000354687,9606.ENSP00000354728,9606.ENSP00000354813,9606.ENSP00000354961,9606.ENSP00000355046,9606.ENSP00000355206	MT-ND1,MT-ND4L,MT-ND5,MT-ND4,MT-ND2,MT-ND3
GO:0032981	mitochondrial respiratory chain complex I assembly	6	65	2.03	6.02e-10	9606.ENSP00000354665,9606.ENSP00000354687,9606.ENSP00000354813,9606.ENSP00000354961,9606.ENSP00000355046,9606.ENSP00000355206	MT-ND6,MT-ND1,MT-ND5,MT-ND4,MT-ND2,MT-ND3
GO:0007005	mitochondrion organization	9	424	1.39	6.2e-10	9606.ENSP00000354632,9606.ENSP00000354665,9606.ENSP00000354687,9606.ENSP00000354813,9606.ENSP00000354961,9606.ENSP00000355046,9606.ENSP00000355206,9606.ENSP00000355265,9606.ENSP00000360266	MT-ATP6,MT-ND6,MT-ND1,MT-ND5,MT-ND4,MT-ND2,MT-ND3,MT-ATP8,JUN
GO:0044281	small molecule metabolic process	12	1779	0.89	2.92e-08	9606.ENSP00000241337,9606.ENSP00000354499,9606.ENSP00000354554,9606.ENSP00000354632,9606.ENSP00000354687,9606.ENSP00000354728,9606.ENSP00000354813,9606.ENSP00000354876,9606.ENSP00000354961,9606.ENSP00000355046,9606.ENSP00000355206,9606.ENSP00000355265	GSTM2,MT-CO1,MT-CYB,MT-ATP6,MT-ND1,MT-ND4L,MT-ND5,MT-CO2,MT-ND4,MT-ND2,MT-ND3,MT-ATP8
GO:1902600	proton transmembrane transport	6	137	1.7	3.4e-08	9606.ENSP00000354499,9606.ENSP00000354554,9606.ENSP00000354632,9606.ENSP00000354876,9606.ENSP00000354982,9606.ENSP00000355265	MT-CO1,MT-CYB,MT-ATP6,MT-CO2,MT-CO3,MT-ATP8
GO:0006979	response to oxidative stress	6	373	1.27	1.04e-05	9606.ENSP00000354499,9606.ENSP00000354665,9606.ENSP00000354687,9606.ENSP00000354813,9606.ENSP00000355206,9606.ENSP00000360266	MT-CO1,MT-ND6,MT-ND1,MT-ND5,MT-ND3,JUN
GO:0019646	aerobic electron transport chain	3	16	2.33	1.04e-05	9606.ENSP00000354499,9606.ENSP00000354876,9606.ENSP00000354982	MT-CO1,MT-CO2,MT-CO3
GO:0006725	cellular aromatic compound metabolic process	14	4754	0.53	1.51e-05	9606.ENSP00000241337,9606.ENSP00000242480,9606.ENSP00000354499,9606.ENSP00000354554,9606.ENSP00000354632,9606.ENSP00000354687,9606.ENSP00000354728,9606.ENSP00000354813,9606.ENSP00000354876,9606.ENSP00000354961,9606.ENSP00000355046,9606.ENSP00000355206,9606.ENSP00000355265,9606.ENSP00000360266	GSTM2,EGR2,MT-CO1,MT-CYB,MT-ATP6,MT-ND1,MT-ND4L,MT-ND5,MT-CO2,MT-ND4,MT-ND2,MT-ND3,MT-ATP8,JUN
GO:0009628	response to abiotic stimulus	8	1052	0.94	2.08e-05	9606.ENSP00000354499,9606.ENSP00000354554,9606.ENSP00000354632,9606.ENSP00000354813,9606.ENSP00000354876,9606.ENSP00000354961,9606.ENSP00000355206,9606.ENSP00000360266	MT-CO1,MT-CYB,MT-ATP6,MT-ND5,MT-CO2,MT-ND4,MT-ND3,JUN
GO:1901360	organic cyclic compound metabolic process	14	4963	0.51	2.48e-05	9606.ENSP00000241337,9606.ENSP00000242480,9606.ENSP00000354499,9606.ENSP00000354554,9606.ENSP00000354632,9606.ENSP00000354687,9606.ENSP00000354728,9606.ENSP00000354813,9606.ENSP00000354876,9606.ENSP00000354961,9606.ENSP00000355046,9606.ENSP00000355206,9606.ENSP00000355265,9606.ENSP00000360266	GSTM2,EGR2,MT-CO1,MT-CYB,MT-ATP6,MT-ND1,MT-ND4L,MT-ND5,MT-CO2,MT-ND4,MT-ND2,MT-ND3,MT-ATP8,JUN
GO:0009636	response to toxic substance	6	468	1.17	3.32e-05	9606.ENSP00000241337,9606.ENSP00000354554,9606.ENSP00000354665,9606.ENSP00000354813,9606.ENSP00000354961,9606.ENSP00000360266	GSTM2,MT-CYB,MT-ND6,MT-ND5,MT-ND4,JUN
GO:0034641	cellular nitrogen compound metabolic process	14	5126	0.5	3.61e-05	9606.ENSP00000241337,9606.ENSP00000242480,9606.ENSP00000354499,9606.ENSP00000354554,9606.ENSP00000354632,9606.ENSP00000354687,9606.ENSP00000354728,9606.ENSP00000354813,9606.ENSP00000354876,9606.ENSP00000354961,9606.ENSP00000355046,9606.ENSP00000355206,9606.ENSP00000355265,9606.ENSP00000360266	GSTM2,EGR2,MT-CO1,MT-CYB,MT-ATP6,MT-ND1,MT-ND4L,MT-ND5,MT-CO2,MT-ND4,MT-ND2,MT-ND3,MT-ATP8,JUN
GO:0034622	cellular protein-containing complex assembly	7	832	0.99	5.71e-05	9606.ENSP00000354665,9606.ENSP00000354687,9606.ENSP00000354813,9606.ENSP00000354961,9606.ENSP00000354982,9606.ENSP00000355046,9606.ENSP00000355206	MT-ND6,MT-ND1,MT-ND5,MT-ND4,MT-CO3,MT-ND2,MT-ND3
GO:0015990	electron transport coupled proton transport	2	2	3.06	6.9e-05	9606.ENSP00000354499,9606.ENSP00000354554	MT-CO1,MT-CYB
GO:0014070	response to organic cyclic compound	7	873	0.97	7.52e-05	9606.ENSP00000241337,9606.ENSP00000338330,9606.ENSP00000354554,9606.ENSP00000354665,9606.ENSP00000354687,9606.ENSP00000355206,9606.ENSP00000360266	GSTM2,PAQR6,MT-CYB,MT-ND6,MT-ND1,MT-ND3,JUN
GO:0046677	response to antibiotic	5	305	1.28	7.94e-05	9606.ENSP00000354554,9606.ENSP00000354665,9606.ENSP00000354813,9606.ENSP00000354961,9606.ENSP00000360266	MT-CYB,MT-ND6,MT-ND5,MT-ND4,JUN
GO:0006139	nucleobase-containing compound metabolic process	13	4551	0.52	8.14e-05	9606.ENSP00000242480,9606.ENSP00000354499,9606.ENSP00000354554,9606.ENSP00000354632,9606.ENSP00000354687,9606.ENSP00000354728,9606.ENSP00000354813,9606.ENSP00000354876,9606.ENSP00000354961,9606.ENSP00000355046,9606.ENSP00000355206,9606.ENSP00000355265,9606.ENSP00000360266	EGR2,MT-CO1,MT-CYB,MT-ATP6,MT-ND1,MT-ND4L,MT-ND5,MT-CO2,MT-ND4,MT-ND2,MT-ND3,MT-ATP8,JUN
GO:0042493	response to drug	7	900	0.95	8.66e-05	9606.ENSP00000241337,9606.ENSP00000354554,9606.ENSP00000354665,9606.ENSP00000354687,9606.ENSP00000354813,9606.ENSP00000354961,9606.ENSP00000360266	GSTM2,MT-CYB,MT-ND6,MT-ND1,MT-ND5,MT-ND4,JUN
GO:0006950	response to stress	11	3267	0.59	0.00019	9606.ENSP00000241337,9606.ENSP00000354499,9606.ENSP00000354554,9606.ENSP00000354632,9606.ENSP00000354665,9606.ENSP00000354687,9606.ENSP00000354813,9606.ENSP00000354876,9606.ENSP00000354961,9606.ENSP00000355206,9606.ENSP00000360266	GSTM2,MT-CO1,MT-CYB,MT-ATP6,MT-ND6,MT-ND1,MT-ND5,MT-CO2,MT-ND4,MT-ND3,JUN
GO:0010033	response to organic substance	10	2815	0.61	0.00038	9606.ENSP00000241337,9606.ENSP00000242480,9606.ENSP00000338330,9606.ENSP00000354554,9606.ENSP00000354665,9606.ENSP00000354687,9606.ENSP00000354813,9606.ENSP00000354961,9606.ENSP00000355206,9606.ENSP00000360266	GSTM2,EGR2,PAQR6,MT-CYB,MT-ND6,MT-ND1,MT-ND5,MT-ND4,MT-ND3,JUN
GO:1901564	organonitrogen compound metabolic process	13	5281	0.45	0.00041	9606.ENSP00000241337,9606.ENSP00000242480,9606.ENSP00000354499,9606.ENSP00000354554,9606.ENSP00000354632,9606.ENSP00000354687,9606.ENSP00000354728,9606.ENSP00000354813,9606.ENSP00000354876,9606.ENSP00000354961,9606.ENSP00000355046,9606.ENSP00000355206,9606.ENSP00000355265	GSTM2,EGR2,MT-CO1,MT-CYB,MT-ATP6,MT-ND1,MT-ND4L,MT-ND5,MT-CO2,MT-ND4,MT-ND2,MT-ND3,MT-ATP8
GO:0010035	response to inorganic substance	5	491	1.07	0.00063	9606.ENSP00000354499,9606.ENSP00000354554,9606.ENSP00000354665,9606.ENSP00000354813,9606.ENSP00000360266	MT-CO1,MT-CYB,MT-ND6,MT-ND5,JUN
GO:0007568	aging	4	255	1.26	0.00078	9606.ENSP00000354499,9606.ENSP00000354632,9606.ENSP00000354961,9606.ENSP00000360266	MT-CO1,MT-ATP6,MT-ND4,JUN
GO:0010243	response to organonitrogen compound	6	876	0.9	0.00081	9606.ENSP00000241337,9606.ENSP00000242480,9606.ENSP00000354554,9606.ENSP00000354665,9606.ENSP00000354813,9606.ENSP00000360266	GSTM2,EGR2,MT-CYB,MT-ND6,MT-ND5,JUN
GO:0006123	mitochondrial electron transport, cytochrome c to oxygen	2	15	2.19	0.0012	9606.ENSP00000354499,9606.ENSP00000354876	MT-CO1,MT-CO2
GO:0008152	metabolic process	16	9569	0.28	0.0012	9606.ENSP00000241337,9606.ENSP00000242480,9606.ENSP00000354499,9606.ENSP00000354554,9606.ENSP00000354632,9606.ENSP00000354665,9606.ENSP00000354687,9606.ENSP00000354728,9606.ENSP00000354813,9606.ENSP00000354876,9606.ENSP00000354961,9606.ENSP00000354982,9606.ENSP00000355046,9606.ENSP00000355206,9606.ENSP00000355265,9606.ENSP00000360266	GSTM2,EGR2,MT-CO1,MT-CYB,MT-ATP6,MT-ND6,MT-ND1,MT-ND4L,MT-ND5,MT-CO2,MT-ND4,MT-CO3,MT-ND2,MT-ND3,MT-ATP8,JUN
GO:1901700	response to oxygen-containing compound	7	1427	0.75	0.0013	9606.ENSP00000242480,9606.ENSP00000354554,9606.ENSP00000354665,9606.ENSP00000354687,9606.ENSP00000354813,9606.ENSP00000354961,9606.ENSP00000360266	EGR2,MT-CYB,MT-ND6,MT-ND1,MT-ND5,MT-ND4,JUN
GO:0042542	response to hydrogen peroxide	3	112	1.49	0.0014	9606.ENSP00000354665,9606.ENSP00000354813,9606.ENSP00000360266	MT-ND6,MT-ND5,JUN
GO:0042776	mitochondrial ATP synthesis coupled proton transport	2	17	2.13	0.0014	9606.ENSP00000354632,9606.ENSP00000355265	MT-ATP6,MT-ATP8
GO:0042221	response to chemical	11	4153	0.48	0.0015	9606.ENSP00000241337,9606.ENSP00000242480,9606.ENSP00000338330,9606.ENSP00000354499,9606.ENSP00000354554,9606.ENSP00000354665,9606.ENSP00000354687,9606.ENSP00000354813,9606.ENSP00000354961,9606.ENSP00000355206,9606.ENSP00000360266	GSTM2,EGR2,PAQR6,MT-CO1,MT-CYB,MT-ND6,MT-ND1,MT-ND5,MT-ND4,MT-ND3,JUN
GO:0070482	response to oxygen levels	4	321	1.16	0.0016	9606.ENSP00000354554,9606.ENSP00000354632,9606.ENSP00000354813,9606.ENSP00000354961	MT-CYB,MT-ATP6,MT-ND5,MT-ND4
GO:0055093	response to hyperoxia	2	21	2.04	0.0019	9606.ENSP00000354554,9606.ENSP00000354632	MT-CYB,MT-ATP6
GO:0030902	hindbrain development	3	144	1.38	0.0027	9606.ENSP00000242480,9606.ENSP00000354499,9606.ENSP00000354961	EGR2,MT-CO1,MT-ND4
GO:0044237	cellular metabolic process	15	8797	0.29	0.0029	9606.ENSP00000241337,9606.ENSP00000242480,9606.ENSP00000354499,9606.ENSP00000354554,9606.ENSP00000354632,9606.ENSP00000354687,9606.ENSP00000354728,9606.ENSP00000354813,9606.ENSP00000354876,9606.ENSP00000354961,9606.ENSP00000354982,9606.ENSP00000355046,9606.ENSP00000355206,9606.ENSP00000355265,9606.ENSP00000360266	GSTM2,EGR2,MT-CO1,MT-CYB,MT-ATP6,MT-ND1,MT-ND4L,MT-ND5,MT-CO2,MT-ND4,MT-CO3,MT-ND2,MT-ND3,MT-ATP8,JUN
GO:0046688	response to copper ion	2	28	1.91	0.003	9606.ENSP00000354499,9606.ENSP00000354554	MT-CO1,MT-CYB
GO:0042407	cristae formation	2	31	1.87	0.0035	9606.ENSP00000354632,9606.ENSP00000355265	MT-ATP6,MT-ATP8
GO:0009725	response to hormone	5	854	0.83	0.0056	9606.ENSP00000242480,9606.ENSP00000338330,9606.ENSP00000354554,9606.ENSP00000355206,9606.ENSP00000360266	EGR2,PAQR6,MT-CYB,MT-ND3,JUN
GO:0009719	response to endogenous stimulus	6	1353	0.71	0.0061	9606.ENSP00000241337,9606.ENSP00000242480,9606.ENSP00000338330,9606.ENSP00000354554,9606.ENSP00000355206,9606.ENSP00000360266	GSTM2,EGR2,PAQR6,MT-CYB,MT-ND3,JUN
GO:0035094	response to nicotine	2	49	1.67	0.0075	9606.ENSP00000354665,9606.ENSP00000354961	MT-ND6,MT-ND4
GO:0016043	cellular component organization	11	5163	0.39	0.0086	9606.ENSP00000242480,9606.ENSP00000354632,9606.ENSP00000354665,9606.ENSP00000354687,9606.ENSP00000354813,9606.ENSP00000354961,9606.ENSP00000354982,9606.ENSP00000355046,9606.ENSP00000355206,9606.ENSP00000355265,9606.ENSP00000360266	EGR2,MT-ATP6,MT-ND6,MT-ND1,MT-ND5,MT-ND4,MT-CO3,MT-ND2,MT-ND3,MT-ATP8,JUN
GO:0046686	response to cadmium ion	2	56	1.61	0.0094	9606.ENSP00000354554,9606.ENSP00000360266	MT-CYB,JUN
GO:0001666	response to hypoxia	3	288	1.08	0.0153	9606.ENSP00000354554,9606.ENSP00000354813,9606.ENSP00000354961	MT-CYB,MT-ND5,MT-ND4
GO:0044238	primary metabolic process	14	8808	0.26	0.0153	9606.ENSP00000241337,9606.ENSP00000242480,9606.ENSP00000354499,9606.ENSP00000354554,9606.ENSP00000354632,9606.ENSP00000354687,9606.ENSP00000354728,9606.ENSP00000354813,9606.ENSP00000354876,9606.ENSP00000354961,9606.ENSP00000355046,9606.ENSP00000355206,9606.ENSP00000355265,9606.ENSP00000360266	GSTM2,EGR2,MT-CO1,MT-CYB,MT-ATP6,MT-ND1,MT-ND4L,MT-ND5,MT-CO2,MT-ND4,MT-ND2,MT-ND3,MT-ATP8,JUN
GO:0050896	response to stimulus	13	7824	0.28	0.0193	9606.ENSP00000241337,9606.ENSP00000242480,9606.ENSP00000338330,9606.ENSP00000354499,9606.ENSP00000354554,9606.ENSP00000354632,9606.ENSP00000354665,9606.ENSP00000354687,9606.ENSP00000354813,9606.ENSP00000354876,9606.ENSP00000354961,9606.ENSP00000355206,9606.ENSP00000360266	GSTM2,EGR2,PAQR6,MT-CO1,MT-CYB,MT-ATP6,MT-ND6,MT-ND1,MT-ND5,MT-CO2,MT-ND4,MT-ND3,JUN
GO:0010038	response to metal ion	3	339	1.01	0.0218	9606.ENSP00000354499,9606.ENSP00000354554,9606.ENSP00000360266	MT-CO1,MT-CYB,JUN
GO:0021549	cerebellum development	2	96	1.38	0.0232	9606.ENSP00000354499,9606.ENSP00000354961	MT-CO1,MT-ND4
GO:0009168	purine ribonucleoside monophosphate biosynthetic process	2	98	1.37	0.0239	9606.ENSP00000354632,9606.ENSP00000355265	MT-ATP6,MT-ATP8
GO:0043279	response to alkaloid	2	106	1.34	0.0266	9606.ENSP00000241337,9606.ENSP00000354665	GSTM2,MT-ND6
GO:0051592	response to calcium ion	2	129	1.25	0.0375	9606.ENSP00000354554,9606.ENSP00000360266	MT-CYB,JUN
GO:0045471	response to ethanol	2	134	1.23	0.04	9606.ENSP00000354554,9606.ENSP00000354961	MT-CYB,MT-ND4
GO:0009987	cellular process	17	14652	0.13	0.0478	9606.ENSP00000241337,9606.ENSP00000242480,9606.ENSP00000338330,9606.ENSP00000354499,9606.ENSP00000354554,9606.ENSP00000354632,9606.ENSP00000354665,9606.ENSP00000354687,9606.ENSP00000354728,9606.ENSP00000354813,9606.ENSP00000354876,9606.ENSP00000354961,9606.ENSP00000354982,9606.ENSP00000355046,9606.ENSP00000355206,9606.ENSP00000355265,9606.ENSP00000360266	GSTM2,EGR2,PAQR6,MT-CO1,MT-CYB,MT-ATP6,MT-ND6,MT-ND1,MT-ND4L,MT-ND5,MT-CO2,MT-ND4,MT-CO3,MT-ND2,MT-ND3,MT-ATP8,JUN
GO:0014074	response to purine-containing compound	2	151	1.18	0.0494	9606.ENSP00000241337,9606.ENSP00000360266	GSTM2,JUN
GO:0031099	regeneration	2	151	1.18	0.0494	9606.ENSP00000354554,9606.ENSP00000360266	MT-CYB,JUN

## Sheet: Cntrl_vs_Crypto_KEGG_Up_24h
Supplementary table S6: Results from the Gene Ontology (GO) analysis in the category for biological process complete (GObp) and Pathway Enrichment (KEGG pathways) in Cryptosporidium parvum infected cells at 24 hpi.
#term ID	term description	observed gene count	background gene count	strength	false discovery rate	matching proteins in your network (IDs)	matching proteins in your network (labels)
hsa00190	Oxidative phosphorylation	13	131	2.06	1.52e-23	9606.ENSP00000354499,9606.ENSP00000354554,9606.ENSP00000354632,9606.ENSP00000354665,9606.ENSP00000354687,9606.ENSP00000354728,9606.ENSP00000354813,9606.ENSP00000354876,9606.ENSP00000354961,9606.ENSP00000354982,9606.ENSP00000355046,9606.ENSP00000355206,9606.ENSP00000355265	MT-CO1,MT-CYB,MT-ATP6,MT-ND6,MT-ND1,MT-ND4L,MT-ND5,MT-CO2,MT-ND4,MT-CO3,MT-ND2,MT-ND3,MT-ATP8
hsa05012	Parkinson's disease	13	142	2.02	2.06e-23	9606.ENSP00000354499,9606.ENSP00000354554,9606.ENSP00000354632,9606.ENSP00000354665,9606.ENSP00000354687,9606.ENSP00000354728,9606.ENSP00000354813,9606.ENSP00000354876,9606.ENSP00000354961,9606.ENSP00000354982,9606.ENSP00000355046,9606.ENSP00000355206,9606.ENSP00000355265	MT-CO1,MT-CYB,MT-ATP6,MT-ND6,MT-ND1,MT-ND4L,MT-ND5,MT-CO2,MT-ND4,MT-CO3,MT-ND2,MT-ND3,MT-ATP8
hsa04714	Thermogenesis	13	228	1.82	5.05e-21	9606.ENSP00000354499,9606.ENSP00000354554,9606.ENSP00000354632,9606.ENSP00000354665,9606.ENSP00000354687,9606.ENSP00000354728,9606.ENSP00000354813,9606.ENSP00000354876,9606.ENSP00000354961,9606.ENSP00000354982,9606.ENSP00000355046,9606.ENSP00000355206,9606.ENSP00000355265	MT-CO1,MT-CYB,MT-ATP6,MT-ND6,MT-ND1,MT-ND4L,MT-ND5,MT-CO2,MT-ND4,MT-CO3,MT-ND2,MT-ND3,MT-ATP8
hsa01100	Metabolic pathways	13	1250	1.08	9.11e-12	9606.ENSP00000354499,9606.ENSP00000354554,9606.ENSP00000354632,9606.ENSP00000354665,9606.ENSP00000354687,9606.ENSP00000354728,9606.ENSP00000354813,9606.ENSP00000354876,9606.ENSP00000354961,9606.ENSP00000354982,9606.ENSP00000355046,9606.ENSP00000355206,9606.ENSP00000355265	MT-CO1,MT-CYB,MT-ATP6,MT-ND6,MT-ND1,MT-ND4L,MT-ND5,MT-CO2,MT-ND4,MT-CO3,MT-ND2,MT-ND3,MT-ATP8
hsa04723	Retrograde endocannabinoid signaling	7	148	1.74	3.83e-10	9606.ENSP00000354665,9606.ENSP00000354687,9606.ENSP00000354728,9606.ENSP00000354813,9606.ENSP00000354961,9606.ENSP00000355046,9606.ENSP00000355206	MT-ND6,MT-ND1,MT-ND4L,MT-ND5,MT-ND4,MT-ND2,MT-ND3
hsa05010	Alzheimer's disease	6	168	1.61	5.32e-08	9606.ENSP00000354499,9606.ENSP00000354554,9606.ENSP00000354632,9606.ENSP00000354876,9606.ENSP00000354982,9606.ENSP00000355265	MT-CO1,MT-CYB,MT-ATP6,MT-CO2,MT-CO3,MT-ATP8
hsa05016	Huntington's disease	6	193	1.55	1.02e-07	9606.ENSP00000354499,9606.ENSP00000354554,9606.ENSP00000354632,9606.ENSP00000354876,9606.ENSP00000354982,9606.ENSP00000355265	MT-CO1,MT-CYB,MT-ATP6,MT-CO2,MT-CO3,MT-ATP8
hsa04932	Non-alcoholic fatty liver disease (NAFLD)	5	149	1.59	1.25e-06	9606.ENSP00000354499,9606.ENSP00000354554,9606.ENSP00000354876,9606.ENSP00000354982,9606.ENSP00000360266	MT-CO1,MT-CYB,MT-CO2,MT-CO3,JUN
hsa04260	Cardiac muscle contraction	4	76	1.78	4.07e-06	9606.ENSP00000354499,9606.ENSP00000354554,9606.ENSP00000354876,9606.ENSP00000354982	MT-CO1,MT-CYB,MT-CO2,MT-CO3
hsa05418	Fluid shear stress and atherosclerosis	2	133	1.24	0.0372	9606.ENSP00000241337,9606.ENSP00000360266	GSTM2,JUN
hsa05161	Hepatitis B	2	142	1.21	0.0383	9606.ENSP00000242480,9606.ENSP00000360266	EGR2,JUN

## Sheet: Cntrl_vs_Crypto_Bio_Down_24h
Supplementary table S6: Results from the Gene Ontology (GO) analysis in the category for biological process complete (GObp) and Pathway Enrichment (KEGG pathways) in Cryptosporidium parvum infected cells at 24 hpi.
No GObp identified among downregulated genes

## Sheet: Cntrl_vs_Crypto_KEGG_Down_24h
None
Supplementary table S6: Results from the Gene Ontology (GO) analysis in the category for biological process complete (GObp) and Pathway Enrichment (KEGG pathways) in Cryptosporidium parvum infected cells at 24 hpi.
No KEGG identified among downregulated genes
