# Supplementary material for: Gene expression profile of HCT-8 cells following single or co-infections with Cryptosporidium parvum and bovine coronavirus
Source: Research Square preprint supplement (doi:10.21203/rs.3.rs-2673942/v1), 2023-03-23
Supplement: Supplementary file 11 [file e13e2a2fd5a7e15b90dc1fc9.xlsx]

## Sheet: Cntrl_vs_Virus_24h_Bio_process
Supplementary table S4: Results from the Gene Ontology (GO) analysis in the category for biological process complete (GObp) and Pathway Enrichment (KEGG pathways) in BCoV infected cells at 24 hpi.
#term ID	term description	observed gene count	background gene count	strength	false discovery rate	matching proteins in your network (IDs)	matching proteins in your network (labels)
GO:0033554	cellular response to stress	29	1553	0.66	3.36e-09	9606.ENSP00000167588,9606.ENSP00000200453,9606.ENSP00000239938,9606.ENSP00000249356,9606.ENSP00000256458,9606.ENSP00000263339,9606.ENSP00000272233,9606.ENSP00000306245,9606.ENSP00000306512,9606.ENSP00000307235,9606.ENSP00000307305,9606.ENSP00000326813,9606.ENSP00000344352,9606.ENSP00000344741,9606.ENSP00000349547,9606.ENSP00000356438,9606.ENSP00000360025,9606.ENSP00000360266,9606.ENSP00000360762,…	KRT20,PPP1R15A,EGR1,DNAJB9,IRAK2,IL1A,RHOB,FOS,CXCL8,EIF2AK3,DDIT4,YOD1,ATF3,INSIG1,RASSF1,PTGS2,GADD45A,JUN,ANKRD1,ERRFI1,EDN1,NABP1,HERPUD1,CDKN2AIP,FICD,DDIT3,ZFP36,DNAJC3,VEGFA
GO:0009966	regulation of signal transduction	38	3033	0.49	2.52e-08	9606.ENSP00000200453,9606.ENSP00000230990,9606.ENSP00000239223,9606.ENSP00000239938,9606.ENSP00000244869,9606.ENSP00000249356,9606.ENSP00000252809,9606.ENSP00000256458,9606.ENSP00000263339,9606.ENSP00000265138,9606.ENSP00000272233,9606.ENSP00000279488,9606.ENSP00000288943,9606.ENSP00000296026,9606.ENSP00000306512,9606.ENSP00000307235,9606.ENSP00000307305,9606.ENSP00000321026,9606.ENSP00000326737,…	PPP1R15A,HBEGF,DUSP1,EGR1,EREG,DNAJB9,GDF15,IRAK2,IL1A,ARRDC3,RHOB,DUSP6,DUSP2,CXCL3,CXCL8,EIF2AK3,DDIT4,LURAP1L,TNFRSF12A,ATF3,INSIG1,PTGS2,RGS16,CTGF,GADD45A,JUN,ANKRD1,ERRFI1,EDN1,XDH,CYR61,HERPUD1,CDKN2AIP,CXCL2,MANF,FICD,DDIT3,VEGFA
GO:0006950	response to stress	39	3267	0.47	3.37e-08	9606.ENSP00000167588,9606.ENSP00000200453,9606.ENSP00000230990,9606.ENSP00000239223,9606.ENSP00000239938,9606.ENSP00000244869,9606.ENSP00000249356,9606.ENSP00000256458,9606.ENSP00000263339,9606.ENSP00000272233,9606.ENSP00000279488,9606.ENSP00000296026,9606.ENSP00000306245,9606.ENSP00000306512,9606.ENSP00000307235,9606.ENSP00000307305,9606.ENSP00000326813,9606.ENSP00000344352,9606.ENSP00000344741,…	KRT20,PPP1R15A,HBEGF,DUSP1,EGR1,EREG,DNAJB9,IRAK2,IL1A,RHOB,DUSP6,CXCL3,FOS,CXCL8,EIF2AK3,DDIT4,YOD1,ATF3,INSIG1,RASSF1,TSC22D2,PTGS2,CTGF,GADD45A,JUN,ANKRD1,ERRFI1,EDN1,CYR61,NABP1,HERPUD1,CDKN2AIP,CXCL2,MANF,FICD,DDIT3,ZFP36,DNAJC3,VEGFA
GO:0010033	response to organic substance	36	2815	0.5	3.37e-08	9606.ENSP00000239223,9606.ENSP00000239938,9606.ENSP00000242480,9606.ENSP00000244869,9606.ENSP00000249356,9606.ENSP00000252809,9606.ENSP00000256458,9606.ENSP00000263339,9606.ENSP00000270162,9606.ENSP00000279488,9606.ENSP00000296026,9606.ENSP00000306245,9606.ENSP00000306512,9606.ENSP00000307235,9606.ENSP00000307305,9606.ENSP00000326737,9606.ENSP00000326813,9606.ENSP00000344352,9606.ENSP00000344741,…	DUSP1,EGR1,EGR2,EREG,DNAJB9,GDF15,IRAK2,IL1A,SIK1,DUSP6,CXCL3,FOS,CXCL8,EIF2AK3,DDIT4,TNFRSF12A,YOD1,ATF3,INSIG1,PTGS2,CTGF,JUN,ANKRD1,ERRFI1,EDN1,HERPUD1,TIPARP,CXCL2,MANF,NR4A1,FICD,DDIT3,IER2,ZFP36,DNAJC3,VEGFA
GO:0010646	regulation of cell communication	39	3327	0.46	3.37e-08	9606.ENSP00000200453,9606.ENSP00000230990,9606.ENSP00000239223,9606.ENSP00000239938,9606.ENSP00000242480,9606.ENSP00000244869,9606.ENSP00000249356,9606.ENSP00000252809,9606.ENSP00000256458,9606.ENSP00000263339,9606.ENSP00000265138,9606.ENSP00000272233,9606.ENSP00000279488,9606.ENSP00000288943,9606.ENSP00000296026,9606.ENSP00000306512,9606.ENSP00000307235,9606.ENSP00000307305,9606.ENSP00000321026,…	PPP1R15A,HBEGF,DUSP1,EGR1,EGR2,EREG,DNAJB9,GDF15,IRAK2,IL1A,ARRDC3,RHOB,DUSP6,DUSP2,CXCL3,CXCL8,EIF2AK3,DDIT4,LURAP1L,TNFRSF12A,ATF3,INSIG1,PTGS2,RGS16,CTGF,GADD45A,JUN,ANKRD1,ERRFI1,EDN1,XDH,CYR61,HERPUD1,CDKN2AIP,CXCL2,MANF,FICD,DDIT3,VEGFA
GO:0023051	regulation of signaling	39	3360	0.45	3.37e-08	9606.ENSP00000200453,9606.ENSP00000230990,9606.ENSP00000239223,9606.ENSP00000239938,9606.ENSP00000242480,9606.ENSP00000244869,9606.ENSP00000249356,9606.ENSP00000252809,9606.ENSP00000256458,9606.ENSP00000263339,9606.ENSP00000265138,9606.ENSP00000272233,9606.ENSP00000279488,9606.ENSP00000288943,9606.ENSP00000296026,9606.ENSP00000306512,9606.ENSP00000307235,9606.ENSP00000307305,9606.ENSP00000321026,…	PPP1R15A,HBEGF,DUSP1,EGR1,EGR2,EREG,DNAJB9,GDF15,IRAK2,IL1A,ARRDC3,RHOB,DUSP6,DUSP2,CXCL3,CXCL8,EIF2AK3,DDIT4,LURAP1L,TNFRSF12A,ATF3,INSIG1,PTGS2,RGS16,CTGF,GADD45A,JUN,ANKRD1,ERRFI1,EDN1,XDH,CYR61,HERPUD1,CDKN2AIP,CXCL2,MANF,FICD,DDIT3,VEGFA
GO:0070887	cellular response to chemical stimulus	35	2672	0.51	3.37e-08	9606.ENSP00000230990,9606.ENSP00000239223,9606.ENSP00000239938,9606.ENSP00000242480,9606.ENSP00000244869,9606.ENSP00000249356,9606.ENSP00000252809,9606.ENSP00000256458,9606.ENSP00000263339,9606.ENSP00000270162,9606.ENSP00000272233,9606.ENSP00000296026,9606.ENSP00000306245,9606.ENSP00000306512,9606.ENSP00000307235,9606.ENSP00000307305,9606.ENSP00000314619,9606.ENSP00000326737,9606.ENSP00000326813,…	HBEGF,DUSP1,EGR1,EGR2,EREG,DNAJB9,GDF15,IRAK2,IL1A,SIK1,RHOB,CXCL3,FOS,CXCL8,EIF2AK3,DDIT4,ZFAND2A,TNFRSF12A,YOD1,ATF3,INSIG1,PTGS2,CTGF,JUN,ANKRD1,ERRFI1,EDN1,HERPUD1,TIPARP,CXCL2,NR4A1,DDIT3,ZFP36,DNAJC3,VEGFA
GO:0071310	cellular response to organic substance	32	2219	0.55	3.37e-08	9606.ENSP00000239223,9606.ENSP00000239938,9606.ENSP00000242480,9606.ENSP00000244869,9606.ENSP00000249356,9606.ENSP00000252809,9606.ENSP00000256458,9606.ENSP00000263339,9606.ENSP00000270162,9606.ENSP00000296026,9606.ENSP00000306245,9606.ENSP00000306512,9606.ENSP00000307235,9606.ENSP00000307305,9606.ENSP00000326737,9606.ENSP00000326813,9606.ENSP00000344352,9606.ENSP00000344741,9606.ENSP00000356438,…	DUSP1,EGR1,EGR2,EREG,DNAJB9,GDF15,IRAK2,IL1A,SIK1,CXCL3,FOS,CXCL8,EIF2AK3,DDIT4,TNFRSF12A,YOD1,ATF3,INSIG1,PTGS2,CTGF,JUN,ANKRD1,ERRFI1,EDN1,HERPUD1,TIPARP,CXCL2,NR4A1,DDIT3,ZFP36,DNAJC3,VEGFA
GO:1905897	regulation of response to endoplasmic reticulum stress	9	81	1.43	3.37e-08	9606.ENSP00000200453,9606.ENSP00000249356,9606.ENSP00000307235,9606.ENSP00000326813,9606.ENSP00000409555,9606.ENSP00000432799,9606.ENSP00000446479,9606.ENSP00000448665,9606.ENSP00000473631	PPP1R15A,DNAJB9,EIF2AK3,YOD1,HERPUD1,MANF,FICD,DDIT3,DNAJC3
GO:0001944	vasculature development	16	487	0.91	4.04e-08	9606.ENSP00000239938,9606.ENSP00000244869,9606.ENSP00000272233,9606.ENSP00000306512,9606.ENSP00000307235,9606.ENSP00000326737,9606.ENSP00000356438,9606.ENSP00000356954,9606.ENSP00000360266,9606.ENSP00000366702,9606.ENSP00000368683,9606.ENSP00000398736,9606.ENSP00000420612,9606.ENSP00000440864,9606.ENSP00000448665,9606.ENSP00000478570	EGR1,EREG,RHOB,CXCL8,EIF2AK3,TNFRSF12A,PTGS2,CTGF,JUN,ERRFI1,EDN1,CYR61,TIPARP,NR4A1,DDIT3,VEGFA
GO:0010942	positive regulation of cell death	18	663	0.82	4.49e-08	9606.ENSP00000239223,9606.ENSP00000239938,9606.ENSP00000270162,9606.ENSP00000272233,9606.ENSP00000279488,9606.ENSP00000306245,9606.ENSP00000307235,9606.ENSP00000307305,9606.ENSP00000326737,9606.ENSP00000344352,9606.ENSP00000356438,9606.ENSP00000356954,9606.ENSP00000360025,9606.ENSP00000360266,9606.ENSP00000360762,9606.ENSP00000368727,9606.ENSP00000398736,9606.ENSP00000448665	DUSP1,EGR1,SIK1,RHOB,DUSP6,FOS,EIF2AK3,DDIT4,TNFRSF12A,ATF3,PTGS2,CTGF,GADD45A,JUN,ANKRD1,XDH,CYR61,DDIT3
GO:0051173	positive regulation of nitrogen compound metabolic process	36	2946	0.48	4.49e-08	9606.ENSP00000200453,9606.ENSP00000230990,9606.ENSP00000239938,9606.ENSP00000242480,9606.ENSP00000244869,9606.ENSP00000252809,9606.ENSP00000256458,9606.ENSP00000263339,9606.ENSP00000265138,9606.ENSP00000273153,9606.ENSP00000273668,9606.ENSP00000279488,9606.ENSP00000306245,9606.ENSP00000307235,9606.ENSP00000314619,9606.ENSP00000344352,9606.ENSP00000344741,9606.ENSP00000349547,9606.ENSP00000350633,…	PPP1R15A,HBEGF,EGR1,EGR2,EREG,GDF15,IRAK2,IL1A,ARRDC3,CSRNP1,EAF2,DUSP6,FOS,EIF2AK3,ZFAND2A,ATF3,INSIG1,RASSF1,SERTAD1,PTGS2,CTGF,GADD45A,JUN,ANKRD1,EDN1,XDH,CYR61,HERPUD1,KLF6,TIPARP,NR4A1,DDIT3,IER2,ZFP36,DNAJC3,VEGFA
GO:0048583	regulation of response to stimulus	41	3882	0.41	7.71e-08	9606.ENSP00000200453,9606.ENSP00000230990,9606.ENSP00000239223,9606.ENSP00000239938,9606.ENSP00000244869,9606.ENSP00000249356,9606.ENSP00000252809,9606.ENSP00000256458,9606.ENSP00000263339,9606.ENSP00000265138,9606.ENSP00000272233,9606.ENSP00000279488,9606.ENSP00000288943,9606.ENSP00000296026,9606.ENSP00000306245,9606.ENSP00000306512,9606.ENSP00000307235,9606.ENSP00000307305,9606.ENSP00000321026,…	PPP1R15A,HBEGF,DUSP1,EGR1,EREG,DNAJB9,GDF15,IRAK2,IL1A,ARRDC3,RHOB,DUSP6,DUSP2,CXCL3,FOS,CXCL8,EIF2AK3,DDIT4,LURAP1L,TNFRSF12A,YOD1,ATF3,INSIG1,PTGS2,RGS16,CTGF,GADD45A,JUN,ANKRD1,ERRFI1,EDN1,XDH,CYR61,HERPUD1,CDKN2AIP,CXCL2,MANF,FICD,DDIT3,DNAJC3,VEGFA
GO:0080135	regulation of cellular response to stress	17	618	0.83	9.5e-08	9606.ENSP00000200453,9606.ENSP00000249356,9606.ENSP00000307235,9606.ENSP00000326813,9606.ENSP00000344741,9606.ENSP00000356438,9606.ENSP00000356954,9606.ENSP00000360025,9606.ENSP00000360762,9606.ENSP00000368683,9606.ENSP00000368727,9606.ENSP00000409555,9606.ENSP00000432799,9606.ENSP00000446479,9606.ENSP00000448665,9606.ENSP00000473631,9606.ENSP00000478570	PPP1R15A,DNAJB9,EIF2AK3,YOD1,INSIG1,PTGS2,CTGF,GADD45A,ANKRD1,EDN1,XDH,HERPUD1,MANF,FICD,DDIT3,DNAJC3,VEGFA
GO:0010604	positive regulation of macromolecule metabolic process	36	3081	0.46	1.09e-07	9606.ENSP00000200453,9606.ENSP00000230990,9606.ENSP00000239938,9606.ENSP00000242480,9606.ENSP00000244869,9606.ENSP00000252809,9606.ENSP00000256458,9606.ENSP00000263339,9606.ENSP00000265138,9606.ENSP00000273153,9606.ENSP00000273668,9606.ENSP00000279488,9606.ENSP00000306245,9606.ENSP00000307235,9606.ENSP00000314619,9606.ENSP00000344352,9606.ENSP00000344741,9606.ENSP00000349547,9606.ENSP00000350633,…	PPP1R15A,HBEGF,EGR1,EGR2,EREG,GDF15,IRAK2,IL1A,ARRDC3,CSRNP1,EAF2,DUSP6,FOS,EIF2AK3,ZFAND2A,ATF3,INSIG1,RASSF1,SERTAD1,PTGS2,CTGF,GADD45A,JUN,ANKRD1,EDN1,XDH,CYR61,HERPUD1,KLF6,TIPARP,NR4A1,DDIT3,IER2,ZFP36,DNAJC3,VEGFA
GO:0001568	blood vessel development	15	464	0.9	1.13e-07	9606.ENSP00000239938,9606.ENSP00000244869,9606.ENSP00000272233,9606.ENSP00000306512,9606.ENSP00000307235,9606.ENSP00000326737,9606.ENSP00000356438,9606.ENSP00000356954,9606.ENSP00000360266,9606.ENSP00000368683,9606.ENSP00000398736,9606.ENSP00000420612,9606.ENSP00000440864,9606.ENSP00000448665,9606.ENSP00000478570	EGR1,EREG,RHOB,CXCL8,EIF2AK3,TNFRSF12A,PTGS2,CTGF,JUN,EDN1,CYR61,TIPARP,NR4A1,DDIT3,VEGFA
GO:0048522	positive regulation of cellular process	46	4898	0.36	1.13e-07	9606.ENSP00000200453,9606.ENSP00000230990,9606.ENSP00000239223,9606.ENSP00000239938,9606.ENSP00000242480,9606.ENSP00000244869,9606.ENSP00000252809,9606.ENSP00000256458,9606.ENSP00000263339,9606.ENSP00000265138,9606.ENSP00000270162,9606.ENSP00000272233,9606.ENSP00000273153,9606.ENSP00000273668,9606.ENSP00000279488,9606.ENSP00000296026,9606.ENSP00000306245,9606.ENSP00000306512,9606.ENSP00000307235,…	PPP1R15A,HBEGF,DUSP1,EGR1,EGR2,EREG,GDF15,IRAK2,IL1A,ARRDC3,SIK1,RHOB,CSRNP1,EAF2,DUSP6,CXCL3,FOS,CXCL8,EIF2AK3,DDIT4,ZFAND2A,LURAP1L,TNFRSF12A,PCP4,ATF3,INSIG1,RASSF1,SERTAD1,PTGS2,CTGF,GADD45A,JUN,ANKRD1,EDN1,XDH,CYR61,HERPUD1,KLF6,CDKN2AIP,CXCL2,NR4A1,DDIT3,IER2,ZFP36,DNAJC3,VEGFA
GO:0006986	response to unfolded protein	10	153	1.2	1.55e-07	9606.ENSP00000249356,9606.ENSP00000306512,9606.ENSP00000307235,9606.ENSP00000326813,9606.ENSP00000344352,9606.ENSP00000409555,9606.ENSP00000432799,9606.ENSP00000446479,9606.ENSP00000448665,9606.ENSP00000473631	DNAJB9,CXCL8,EIF2AK3,YOD1,ATF3,HERPUD1,MANF,FICD,DDIT3,DNAJC3
GO:0031325	positive regulation of cellular metabolic process	35	3060	0.45	3.12e-07	9606.ENSP00000200453,9606.ENSP00000230990,9606.ENSP00000239938,9606.ENSP00000242480,9606.ENSP00000244869,9606.ENSP00000252809,9606.ENSP00000256458,9606.ENSP00000263339,9606.ENSP00000265138,9606.ENSP00000273153,9606.ENSP00000273668,9606.ENSP00000279488,9606.ENSP00000306245,9606.ENSP00000307235,9606.ENSP00000314619,9606.ENSP00000344352,9606.ENSP00000344741,9606.ENSP00000349547,9606.ENSP00000350633,…	PPP1R15A,HBEGF,EGR1,EGR2,EREG,GDF15,IRAK2,IL1A,ARRDC3,CSRNP1,EAF2,DUSP6,FOS,EIF2AK3,ZFAND2A,ATF3,INSIG1,RASSF1,SERTAD1,PTGS2,CTGF,GADD45A,JUN,ANKRD1,EDN1,XDH,CYR61,HERPUD1,KLF6,NR4A1,DDIT3,IER2,ZFP36,DNAJC3,VEGFA
GO:0070848	response to growth factor	15	507	0.86	3.12e-07	9606.ENSP00000239938,9606.ENSP00000252809,9606.ENSP00000279488,9606.ENSP00000306245,9606.ENSP00000306512,9606.ENSP00000307305,9606.ENSP00000356954,9606.ENSP00000360266,9606.ENSP00000360762,9606.ENSP00000366702,9606.ENSP00000368683,9606.ENSP00000440864,9606.ENSP00000465617,9606.ENSP00000469647,9606.ENSP00000478570	EGR1,GDF15,DUSP6,FOS,CXCL8,DDIT4,CTGF,JUN,ANKRD1,ERRFI1,EDN1,NR4A1,IER2,ZFP36,VEGFA
GO:0031399	regulation of protein modification process	26	1747	0.56	3.91e-07	9606.ENSP00000200453,9606.ENSP00000230990,9606.ENSP00000239223,9606.ENSP00000239938,9606.ENSP00000244869,9606.ENSP00000252809,9606.ENSP00000256458,9606.ENSP00000265138,9606.ENSP00000279488,9606.ENSP00000288943,9606.ENSP00000307235,9606.ENSP00000307305,9606.ENSP00000344352,9606.ENSP00000349547,9606.ENSP00000350633,9606.ENSP00000356438,9606.ENSP00000356954,9606.ENSP00000360025,9606.ENSP00000360266,…	PPP1R15A,HBEGF,DUSP1,EGR1,EREG,GDF15,IRAK2,ARRDC3,DUSP6,DUSP2,EIF2AK3,DDIT4,ATF3,RASSF1,SERTAD1,PTGS2,CTGF,GADD45A,JUN,ERRFI1,EDN1,XDH,CYR61,HERPUD1,DNAJC3,VEGFA
GO:0042221	response to chemical	41	4153	0.38	3.91e-07	9606.ENSP00000230990,9606.ENSP00000239223,9606.ENSP00000239938,9606.ENSP00000242480,9606.ENSP00000244869,9606.ENSP00000249356,9606.ENSP00000252809,9606.ENSP00000256458,9606.ENSP00000263339,9606.ENSP00000270162,9606.ENSP00000272233,9606.ENSP00000279488,9606.ENSP00000296026,9606.ENSP00000306245,9606.ENSP00000306512,9606.ENSP00000307235,9606.ENSP00000307305,9606.ENSP00000314619,9606.ENSP00000326737,…	HBEGF,DUSP1,EGR1,EGR2,EREG,DNAJB9,GDF15,IRAK2,IL1A,SIK1,RHOB,DUSP6,CXCL3,FOS,CXCL8,EIF2AK3,DDIT4,ZFAND2A,TNFRSF12A,YOD1,ATF3,INSIG1,PTGS2,CTGF,JUN,ANKRD1,SLC25A25,ERRFI1,EDN1,CYR61,HERPUD1,TIPARP,CXCL2,MANF,NR4A1,FICD,DDIT3,IER2,ZFP36,DNAJC3,VEGFA
GO:0001525	angiogenesis	12	297	0.99	4.06e-07	9606.ENSP00000244869,9606.ENSP00000272233,9606.ENSP00000306512,9606.ENSP00000307235,9606.ENSP00000326737,9606.ENSP00000356438,9606.ENSP00000356954,9606.ENSP00000360266,9606.ENSP00000368683,9606.ENSP00000398736,9606.ENSP00000440864,9606.ENSP00000478570	EREG,RHOB,CXCL8,EIF2AK3,TNFRSF12A,PTGS2,CTGF,JUN,EDN1,CYR61,NR4A1,VEGFA
GO:0072359	circulatory system development	18	807	0.74	4.06e-07	9606.ENSP00000239938,9606.ENSP00000244869,9606.ENSP00000270162,9606.ENSP00000272233,9606.ENSP00000306512,9606.ENSP00000307235,9606.ENSP00000326737,9606.ENSP00000356438,9606.ENSP00000356954,9606.ENSP00000360266,9606.ENSP00000360762,9606.ENSP00000366702,9606.ENSP00000368683,9606.ENSP00000398736,9606.ENSP00000420612,9606.ENSP00000440864,9606.ENSP00000448665,9606.ENSP00000478570	EGR1,EREG,SIK1,RHOB,CXCL8,EIF2AK3,TNFRSF12A,PTGS2,CTGF,JUN,ANKRD1,ERRFI1,EDN1,CYR61,TIPARP,NR4A1,DDIT3,VEGFA
GO:0010941	regulation of cell death	25	1638	0.57	4.36e-07	9606.ENSP00000239223,9606.ENSP00000239938,9606.ENSP00000252809,9606.ENSP00000263339,9606.ENSP00000270162,9606.ENSP00000272233,9606.ENSP00000279488,9606.ENSP00000306245,9606.ENSP00000307235,9606.ENSP00000307305,9606.ENSP00000326737,9606.ENSP00000344352,9606.ENSP00000356438,9606.ENSP00000356954,9606.ENSP00000360025,9606.ENSP00000360266,9606.ENSP00000360762,9606.ENSP00000368683,9606.ENSP00000368727,…	DUSP1,EGR1,GDF15,IL1A,SIK1,RHOB,DUSP6,FOS,EIF2AK3,DDIT4,TNFRSF12A,ATF3,PTGS2,CTGF,GADD45A,JUN,ANKRD1,EDN1,XDH,CYR61,HERPUD1,DDIT3,ZFP36,DNAJC3,VEGFA
GO:0034976	response to endoplasmic reticulum stress	11	240	1.05	4.97e-07	9606.ENSP00000200453,9606.ENSP00000249356,9606.ENSP00000306512,9606.ENSP00000307235,9606.ENSP00000326813,9606.ENSP00000344352,9606.ENSP00000360266,9606.ENSP00000409555,9606.ENSP00000446479,9606.ENSP00000448665,9606.ENSP00000473631	PPP1R15A,DNAJB9,CXCL8,EIF2AK3,YOD1,ATF3,JUN,HERPUD1,FICD,DDIT3,DNAJC3
GO:0036499	PERK-mediated unfolded protein response	5	12	2.01	4.97e-07	9606.ENSP00000306512,9606.ENSP00000307235,9606.ENSP00000344352,9606.ENSP00000409555,9606.ENSP00000448665	CXCL8,EIF2AK3,ATF3,HERPUD1,DDIT3
GO:0048514	blood vessel morphogenesis	13	381	0.92	5.29e-07	9606.ENSP00000244869,9606.ENSP00000272233,9606.ENSP00000306512,9606.ENSP00000307235,9606.ENSP00000326737,9606.ENSP00000356438,9606.ENSP00000356954,9606.ENSP00000360266,9606.ENSP00000368683,9606.ENSP00000398736,9606.ENSP00000420612,9606.ENSP00000440864,9606.ENSP00000478570	EREG,RHOB,CXCL8,EIF2AK3,TNFRSF12A,PTGS2,CTGF,JUN,EDN1,CYR61,TIPARP,NR4A1,VEGFA
GO:0048518	positive regulation of biological process	47	5459	0.32	6.63e-07	9606.ENSP00000200453,9606.ENSP00000230990,9606.ENSP00000239223,9606.ENSP00000239938,9606.ENSP00000242480,9606.ENSP00000244869,9606.ENSP00000252809,9606.ENSP00000256458,9606.ENSP00000263339,9606.ENSP00000265138,9606.ENSP00000270162,9606.ENSP00000272233,9606.ENSP00000273153,9606.ENSP00000273668,9606.ENSP00000279488,9606.ENSP00000296026,9606.ENSP00000306245,9606.ENSP00000306512,9606.ENSP00000307235,…	PPP1R15A,HBEGF,DUSP1,EGR1,EGR2,EREG,GDF15,IRAK2,IL1A,ARRDC3,SIK1,RHOB,CSRNP1,EAF2,DUSP6,CXCL3,FOS,CXCL8,EIF2AK3,DDIT4,ZFAND2A,LURAP1L,TNFRSF12A,PCP4,ATF3,INSIG1,RASSF1,SERTAD1,PTGS2,CTGF,GADD45A,JUN,ANKRD1,EDN1,XDH,CYR61,HERPUD1,KLF6,TIPARP,CDKN2AIP,CXCL2,NR4A1,DDIT3,IER2,ZFP36,DNAJC3,VEGFA
GO:0080134	regulation of response to stress	22	1299	0.62	6.63e-07	9606.ENSP00000200453,9606.ENSP00000230990,9606.ENSP00000244869,9606.ENSP00000249356,9606.ENSP00000256458,9606.ENSP00000307235,9606.ENSP00000326737,9606.ENSP00000326813,9606.ENSP00000344741,9606.ENSP00000356438,9606.ENSP00000356954,9606.ENSP00000360025,9606.ENSP00000360762,9606.ENSP00000366702,9606.ENSP00000368683,9606.ENSP00000368727,9606.ENSP00000409555,9606.ENSP00000432799,9606.ENSP00000446479,…	PPP1R15A,HBEGF,EREG,DNAJB9,IRAK2,EIF2AK3,TNFRSF12A,YOD1,INSIG1,PTGS2,CTGF,GADD45A,ANKRD1,ERRFI1,EDN1,XDH,HERPUD1,MANF,FICD,DDIT3,DNAJC3,VEGFA
GO:0006984	ER-nucleus signaling pathway	6	34	1.64	9.59e-07	9606.ENSP00000306512,9606.ENSP00000307235,9606.ENSP00000344352,9606.ENSP00000344741,9606.ENSP00000409555,9606.ENSP00000448665	CXCL8,EIF2AK3,ATF3,INSIG1,HERPUD1,DDIT3
GO:0030968	endoplasmic reticulum unfolded protein response	8	103	1.28	1.18e-06	9606.ENSP00000249356,9606.ENSP00000306512,9606.ENSP00000307235,9606.ENSP00000326813,9606.ENSP00000344352,9606.ENSP00000409555,9606.ENSP00000448665,9606.ENSP00000473631	DNAJB9,CXCL8,EIF2AK3,YOD1,ATF3,HERPUD1,DDIT3,DNAJC3
GO:0048519	negative regulation of biological process	44	4953	0.34	1.18e-06	9606.ENSP00000200453,9606.ENSP00000230990,9606.ENSP00000239223,9606.ENSP00000239938,9606.ENSP00000244869,9606.ENSP00000249356,9606.ENSP00000252809,9606.ENSP00000256458,9606.ENSP00000263339,9606.ENSP00000264444,9606.ENSP00000265138,9606.ENSP00000270162,9606.ENSP00000272233,9606.ENSP00000273668,9606.ENSP00000279488,9606.ENSP00000288943,9606.ENSP00000306512,9606.ENSP00000307235,9606.ENSP00000307305,…	PPP1R15A,HBEGF,DUSP1,EGR1,EREG,DNAJB9,GDF15,IRAK2,IL1A,MXD1,ARRDC3,SIK1,RHOB,EAF2,DUSP6,DUSP2,CXCL8,EIF2AK3,DDIT4,YOD1,ATF3,INSIG1,RASSF1,PTGS2,RGS16,CTGF,GADD45A,JUN,ANKRD1,ERRFI1,EDN1,XDH,E2F6,CYR61,NABP1,HERPUD1,TIPARP,CDKN2AIP,NR4A1,FICD,DDIT3,ZFP36,DNAJC3,VEGFA
GO:0001932	regulation of protein phosphorylation	22	1370	0.59	1.4e-06	9606.ENSP00000230990,9606.ENSP00000239223,9606.ENSP00000239938,9606.ENSP00000244869,9606.ENSP00000252809,9606.ENSP00000256458,9606.ENSP00000279488,9606.ENSP00000288943,9606.ENSP00000307235,9606.ENSP00000307305,9606.ENSP00000344352,9606.ENSP00000350633,9606.ENSP00000356438,9606.ENSP00000356954,9606.ENSP00000360025,9606.ENSP00000360266,9606.ENSP00000366702,9606.ENSP00000368683,9606.ENSP00000368727,…	HBEGF,DUSP1,EGR1,EREG,GDF15,IRAK2,DUSP6,DUSP2,EIF2AK3,DDIT4,ATF3,SERTAD1,PTGS2,CTGF,GADD45A,JUN,ERRFI1,EDN1,XDH,CYR61,DNAJC3,VEGFA
GO:0009888	tissue development	24	1626	0.56	1.4e-06	9606.ENSP00000167588,9606.ENSP00000230990,9606.ENSP00000239223,9606.ENSP00000239938,9606.ENSP00000242480,9606.ENSP00000244869,9606.ENSP00000265138,9606.ENSP00000270162,9606.ENSP00000272233,9606.ENSP00000288943,9606.ENSP00000306245,9606.ENSP00000307235,9606.ENSP00000344352,9606.ENSP00000356438,9606.ENSP00000356954,9606.ENSP00000360266,9606.ENSP00000360762,9606.ENSP00000362159,9606.ENSP00000366702,…	KRT20,HBEGF,DUSP1,EGR1,EGR2,EREG,ARRDC3,SIK1,RHOB,DUSP2,FOS,EIF2AK3,ATF3,PTGS2,CTGF,JUN,ANKRD1,SLC25A25,ERRFI1,GPCPD1,EDN1,CYR61,TIPARP,VEGFA
GO:0042981	regulation of apoptotic process	23	1501	0.57	1.4e-06	9606.ENSP00000239223,9606.ENSP00000239938,9606.ENSP00000252809,9606.ENSP00000263339,9606.ENSP00000270162,9606.ENSP00000272233,9606.ENSP00000279488,9606.ENSP00000307235,9606.ENSP00000326737,9606.ENSP00000344352,9606.ENSP00000356438,9606.ENSP00000356954,9606.ENSP00000360025,9606.ENSP00000360266,9606.ENSP00000360762,9606.ENSP00000368683,9606.ENSP00000368727,9606.ENSP00000398736,9606.ENSP00000409555,…	DUSP1,EGR1,GDF15,IL1A,SIK1,RHOB,DUSP6,EIF2AK3,TNFRSF12A,ATF3,PTGS2,CTGF,GADD45A,JUN,ANKRD1,EDN1,XDH,CYR61,HERPUD1,DDIT3,ZFP36,DNAJC3,VEGFA
GO:0051246	regulation of protein metabolic process	31	2668	0.45	1.4e-06	9606.ENSP00000200453,9606.ENSP00000230990,9606.ENSP00000239223,9606.ENSP00000239938,9606.ENSP00000244869,9606.ENSP00000252809,9606.ENSP00000256458,9606.ENSP00000263339,9606.ENSP00000265138,9606.ENSP00000279488,9606.ENSP00000288943,9606.ENSP00000307235,9606.ENSP00000307305,9606.ENSP00000314619,9606.ENSP00000326813,9606.ENSP00000344352,9606.ENSP00000349547,9606.ENSP00000350633,9606.ENSP00000356438,…	PPP1R15A,HBEGF,DUSP1,EGR1,EREG,GDF15,IRAK2,IL1A,ARRDC3,DUSP6,DUSP2,EIF2AK3,DDIT4,ZFAND2A,YOD1,ATF3,RASSF1,SERTAD1,PTGS2,CTGF,GADD45A,JUN,ERRFI1,EDN1,XDH,CYR61,HERPUD1,TIPARP,ZFP36,DNAJC3,VEGFA
GO:0065009	regulation of molecular function	35	3322	0.41	1.4e-06	9606.ENSP00000200453,9606.ENSP00000230990,9606.ENSP00000239223,9606.ENSP00000239938,9606.ENSP00000244869,9606.ENSP00000252809,9606.ENSP00000256458,9606.ENSP00000263339,9606.ENSP00000265138,9606.ENSP00000270162,9606.ENSP00000279488,9606.ENSP00000288943,9606.ENSP00000296026,9606.ENSP00000306245,9606.ENSP00000306512,9606.ENSP00000307235,9606.ENSP00000350633,9606.ENSP00000356438,9606.ENSP00000356529,…	PPP1R15A,HBEGF,DUSP1,EGR1,EREG,GDF15,IRAK2,IL1A,ARRDC3,SIK1,DUSP6,DUSP2,CXCL3,FOS,CXCL8,EIF2AK3,SERTAD1,PTGS2,RGS16,CTGF,GADD45A,JUN,ERRFI1,EDN1,XDH,VCPKMT,CYR61,HERPUD1,CXCL2,MANF,FICD,DDIT3,ZFP36,DNAJC3,VEGFA
GO:1902531	regulation of intracellular signal transduction	25	1764	0.54	1.4e-06	9606.ENSP00000230990,9606.ENSP00000239223,9606.ENSP00000244869,9606.ENSP00000252809,9606.ENSP00000256458,9606.ENSP00000265138,9606.ENSP00000272233,9606.ENSP00000279488,9606.ENSP00000288943,9606.ENSP00000307235,9606.ENSP00000307305,9606.ENSP00000321026,9606.ENSP00000344352,9606.ENSP00000356438,9606.ENSP00000356954,9606.ENSP00000360025,9606.ENSP00000360266,9606.ENSP00000360762,9606.ENSP00000366702,…	HBEGF,DUSP1,EREG,GDF15,IRAK2,ARRDC3,RHOB,DUSP6,DUSP2,EIF2AK3,DDIT4,LURAP1L,ATF3,PTGS2,CTGF,GADD45A,JUN,ANKRD1,ERRFI1,EDN1,XDH,CYR61,HERPUD1,DDIT3,VEGFA
GO:0043065	positive regulation of apoptotic process	15	604	0.78	1.48e-06	9606.ENSP00000239223,9606.ENSP00000270162,9606.ENSP00000272233,9606.ENSP00000279488,9606.ENSP00000307235,9606.ENSP00000326737,9606.ENSP00000344352,9606.ENSP00000356438,9606.ENSP00000356954,9606.ENSP00000360025,9606.ENSP00000360266,9606.ENSP00000360762,9606.ENSP00000368727,9606.ENSP00000398736,9606.ENSP00000448665	DUSP1,SIK1,RHOB,DUSP6,EIF2AK3,TNFRSF12A,ATF3,PTGS2,CTGF,GADD45A,JUN,ANKRD1,XDH,CYR61,DDIT3
GO:0048523	negative regulation of cellular process	41	4454	0.35	1.6e-06	9606.ENSP00000200453,9606.ENSP00000230990,9606.ENSP00000239223,9606.ENSP00000239938,9606.ENSP00000244869,9606.ENSP00000249356,9606.ENSP00000252809,9606.ENSP00000263339,9606.ENSP00000264444,9606.ENSP00000265138,9606.ENSP00000270162,9606.ENSP00000272233,9606.ENSP00000273668,9606.ENSP00000279488,9606.ENSP00000288943,9606.ENSP00000306512,9606.ENSP00000307235,9606.ENSP00000307305,9606.ENSP00000326813,…	PPP1R15A,HBEGF,DUSP1,EGR1,EREG,DNAJB9,GDF15,IL1A,MXD1,ARRDC3,SIK1,RHOB,EAF2,DUSP6,DUSP2,CXCL8,EIF2AK3,DDIT4,YOD1,ATF3,INSIG1,RASSF1,PTGS2,RGS16,CTGF,GADD45A,JUN,ANKRD1,ERRFI1,EDN1,XDH,E2F6,CYR61,NABP1,HERPUD1,CDKN2AIP,NR4A1,DDIT3,ZFP36,DNAJC3,VEGFA
GO:0009628	response to abiotic stimulus	19	1052	0.65	2.15e-06	9606.ENSP00000239223,9606.ENSP00000239938,9606.ENSP00000263339,9606.ENSP00000270162,9606.ENSP00000272233,9606.ENSP00000306245,9606.ENSP00000307235,9606.ENSP00000307305,9606.ENSP00000354543,9606.ENSP00000356438,9606.ENSP00000356954,9606.ENSP00000360025,9606.ENSP00000360266,9606.ENSP00000360762,9606.ENSP00000366702,9606.ENSP00000368683,9606.ENSP00000403683,9606.ENSP00000473631,9606.ENSP00000478570	DUSP1,EGR1,IL1A,SIK1,RHOB,FOS,EIF2AK3,DDIT4,TSC22D2,PTGS2,CTGF,GADD45A,JUN,ANKRD1,ERRFI1,EDN1,NABP1,DNAJC3,VEGFA
GO:0051248	negative regulation of protein metabolic process	19	1075	0.64	2.94e-06	9606.ENSP00000200453,9606.ENSP00000230990,9606.ENSP00000239223,9606.ENSP00000279488,9606.ENSP00000288943,9606.ENSP00000307235,9606.ENSP00000307305,9606.ENSP00000326813,9606.ENSP00000344352,9606.ENSP00000356438,9606.ENSP00000360025,9606.ENSP00000360266,9606.ENSP00000366702,9606.ENSP00000368683,9606.ENSP00000368727,9606.ENSP00000409555,9606.ENSP00000469647,9606.ENSP00000473631,9606.ENSP00000478570	PPP1R15A,HBEGF,DUSP1,DUSP6,DUSP2,EIF2AK3,DDIT4,YOD1,ATF3,PTGS2,GADD45A,JUN,ERRFI1,EDN1,XDH,HERPUD1,ZFP36,DNAJC3,VEGFA
GO:0051247	positive regulation of protein metabolic process	23	1587	0.55	3.13e-06	9606.ENSP00000200453,9606.ENSP00000230990,9606.ENSP00000239938,9606.ENSP00000244869,9606.ENSP00000252809,9606.ENSP00000256458,9606.ENSP00000263339,9606.ENSP00000265138,9606.ENSP00000279488,9606.ENSP00000307235,9606.ENSP00000314619,9606.ENSP00000349547,9606.ENSP00000356438,9606.ENSP00000356954,9606.ENSP00000360025,9606.ENSP00000360266,9606.ENSP00000368683,9606.ENSP00000368727,9606.ENSP00000398736,…	PPP1R15A,HBEGF,EGR1,EREG,GDF15,IRAK2,IL1A,ARRDC3,DUSP6,EIF2AK3,ZFAND2A,RASSF1,PTGS2,CTGF,GADD45A,JUN,EDN1,XDH,CYR61,HERPUD1,TIPARP,DNAJC3,VEGFA
GO:0032268	regulation of cellular protein metabolic process	29	2486	0.46	3.69e-06	9606.ENSP00000200453,9606.ENSP00000230990,9606.ENSP00000239223,9606.ENSP00000239938,9606.ENSP00000244869,9606.ENSP00000252809,9606.ENSP00000256458,9606.ENSP00000265138,9606.ENSP00000279488,9606.ENSP00000288943,9606.ENSP00000307235,9606.ENSP00000307305,9606.ENSP00000314619,9606.ENSP00000326813,9606.ENSP00000344352,9606.ENSP00000349547,9606.ENSP00000350633,9606.ENSP00000356438,9606.ENSP00000356954,…	PPP1R15A,HBEGF,DUSP1,EGR1,EREG,GDF15,IRAK2,ARRDC3,DUSP6,DUSP2,EIF2AK3,DDIT4,ZFAND2A,YOD1,ATF3,RASSF1,SERTAD1,PTGS2,CTGF,GADD45A,JUN,ERRFI1,EDN1,XDH,CYR61,HERPUD1,ZFP36,DNAJC3,VEGFA
GO:0051171	regulation of nitrogen compound metabolic process	47	5827	0.3	3.69e-06	9606.ENSP00000200453,9606.ENSP00000230990,9606.ENSP00000239223,9606.ENSP00000239938,9606.ENSP00000242480,9606.ENSP00000244869,9606.ENSP00000252809,9606.ENSP00000256458,9606.ENSP00000263339,9606.ENSP00000264444,9606.ENSP00000265138,9606.ENSP00000270162,9606.ENSP00000273153,9606.ENSP00000273668,9606.ENSP00000279488,9606.ENSP00000288943,9606.ENSP00000306245,9606.ENSP00000307235,9606.ENSP00000307305,…	PPP1R15A,HBEGF,DUSP1,EGR1,EGR2,EREG,GDF15,IRAK2,IL1A,MXD1,ARRDC3,SIK1,CSRNP1,EAF2,DUSP6,DUSP2,FOS,EIF2AK3,DDIT4,ZFAND2A,YOD1,ATF3,INSIG1,RASSF1,SERTAD1,TSC22D2,PTGS2,CTGF,GADD45A,JUN,ANKRD1,ZBTB43,ERRFI1,EDN1,XDH,E2F6,ZMYM5,CYR61,HERPUD1,KLF6,TIPARP,NR4A1,DDIT3,IER2,ZFP36,DNAJC3,VEGFA
GO:0071363	cellular response to growth factor stimulus	13	477	0.82	3.95e-06	9606.ENSP00000239938,9606.ENSP00000252809,9606.ENSP00000306245,9606.ENSP00000306512,9606.ENSP00000307305,9606.ENSP00000356954,9606.ENSP00000360266,9606.ENSP00000360762,9606.ENSP00000366702,9606.ENSP00000368683,9606.ENSP00000440864,9606.ENSP00000469647,9606.ENSP00000478570	EGR1,GDF15,FOS,CXCL8,DDIT4,CTGF,JUN,ANKRD1,ERRFI1,EDN1,NR4A1,ZFP36,VEGFA
GO:0048585	negative regulation of response to stimulus	22	1483	0.56	4e-06	9606.ENSP00000200453,9606.ENSP00000239223,9606.ENSP00000239938,9606.ENSP00000249356,9606.ENSP00000252809,9606.ENSP00000263339,9606.ENSP00000265138,9606.ENSP00000279488,9606.ENSP00000288943,9606.ENSP00000306512,9606.ENSP00000307305,9606.ENSP00000326813,9606.ENSP00000344352,9606.ENSP00000344741,9606.ENSP00000356438,9606.ENSP00000356529,9606.ENSP00000366702,9606.ENSP00000368683,9606.ENSP00000368727,…	PPP1R15A,DUSP1,EGR1,DNAJB9,GDF15,IL1A,ARRDC3,DUSP6,DUSP2,CXCL8,DDIT4,YOD1,ATF3,INSIG1,PTGS2,RGS16,ERRFI1,EDN1,XDH,HERPUD1,DDIT3,DNAJC3
GO:0010648	negative regulation of cell communication	20	1255	0.59	5.57e-06	9606.ENSP00000200453,9606.ENSP00000239223,9606.ENSP00000239938,9606.ENSP00000249356,9606.ENSP00000252809,9606.ENSP00000263339,9606.ENSP00000265138,9606.ENSP00000279488,9606.ENSP00000288943,9606.ENSP00000306512,9606.ENSP00000307305,9606.ENSP00000344352,9606.ENSP00000344741,9606.ENSP00000356438,9606.ENSP00000356529,9606.ENSP00000366702,9606.ENSP00000368683,9606.ENSP00000368727,9606.ENSP00000409555,…	PPP1R15A,DUSP1,EGR1,DNAJB9,GDF15,IL1A,ARRDC3,DUSP6,DUSP2,CXCL8,DDIT4,ATF3,INSIG1,PTGS2,RGS16,ERRFI1,EDN1,XDH,HERPUD1,DDIT3
GO:0019220	regulation of phosphate metabolic process	23	1657	0.53	5.59e-06	9606.ENSP00000200453,9606.ENSP00000230990,9606.ENSP00000239223,9606.ENSP00000239938,9606.ENSP00000244869,9606.ENSP00000252809,9606.ENSP00000256458,9606.ENSP00000279488,9606.ENSP00000288943,9606.ENSP00000307235,9606.ENSP00000307305,9606.ENSP00000344352,9606.ENSP00000350633,9606.ENSP00000356438,9606.ENSP00000356954,9606.ENSP00000360025,9606.ENSP00000360266,9606.ENSP00000366702,9606.ENSP00000368683,…	PPP1R15A,HBEGF,DUSP1,EGR1,EREG,GDF15,IRAK2,DUSP6,DUSP2,EIF2AK3,DDIT4,ATF3,SERTAD1,PTGS2,CTGF,GADD45A,JUN,ERRFI1,EDN1,XDH,CYR61,DNAJC3,VEGFA
GO:0023057	negative regulation of signaling	20	1258	0.59	5.59e-06	9606.ENSP00000200453,9606.ENSP00000239223,9606.ENSP00000239938,9606.ENSP00000249356,9606.ENSP00000252809,9606.ENSP00000263339,9606.ENSP00000265138,9606.ENSP00000279488,9606.ENSP00000288943,9606.ENSP00000306512,9606.ENSP00000307305,9606.ENSP00000344352,9606.ENSP00000344741,9606.ENSP00000356438,9606.ENSP00000356529,9606.ENSP00000366702,9606.ENSP00000368683,9606.ENSP00000368727,9606.ENSP00000409555,…	PPP1R15A,DUSP1,EGR1,DNAJB9,GDF15,IL1A,ARRDC3,DUSP6,DUSP2,CXCL8,DDIT4,ATF3,INSIG1,PTGS2,RGS16,ERRFI1,EDN1,XDH,HERPUD1,DDIT3
GO:0032269	negative regulation of cellular protein metabolic process	18	1014	0.64	5.59e-06	9606.ENSP00000200453,9606.ENSP00000239223,9606.ENSP00000279488,9606.ENSP00000288943,9606.ENSP00000307235,9606.ENSP00000307305,9606.ENSP00000326813,9606.ENSP00000344352,9606.ENSP00000356438,9606.ENSP00000360025,9606.ENSP00000360266,9606.ENSP00000366702,9606.ENSP00000368683,9606.ENSP00000368727,9606.ENSP00000409555,9606.ENSP00000469647,9606.ENSP00000473631,9606.ENSP00000478570	PPP1R15A,DUSP1,DUSP6,DUSP2,EIF2AK3,DDIT4,YOD1,ATF3,PTGS2,GADD45A,JUN,ERRFI1,EDN1,XDH,HERPUD1,ZFP36,DNAJC3,VEGFA
GO:0048856	anatomical structure development	43	5085	0.32	5.59e-06	9606.ENSP00000167588,9606.ENSP00000230990,9606.ENSP00000239223,9606.ENSP00000239938,9606.ENSP00000242480,9606.ENSP00000244869,9606.ENSP00000249356,9606.ENSP00000252809,9606.ENSP00000263339,9606.ENSP00000264444,9606.ENSP00000265138,9606.ENSP00000270162,9606.ENSP00000272233,9606.ENSP00000273153,9606.ENSP00000279488,9606.ENSP00000280551,9606.ENSP00000288943,9606.ENSP00000306245,9606.ENSP00000306512,…	KRT20,HBEGF,DUSP1,EGR1,EGR2,EREG,DNAJB9,GDF15,IL1A,MXD1,ARRDC3,SIK1,RHOB,CSRNP1,DUSP6,SEC24D,DUSP2,FOS,CXCL8,EIF2AK3,DDIT4,TNFRSF12A,PCP4,ATF3,INSIG1,PTGS2,CTGF,JUN,ANKRD1,SLC25A25,ERRFI1,GPCPD1,EDN1,XDH,ZMYM5,CYR61,KLF6,TIPARP,MANF,NR4A1,DDIT3,IER2,VEGFA
GO:0007275	multicellular organism development	41	4726	0.33	6.62e-06	9606.ENSP00000167588,9606.ENSP00000230990,9606.ENSP00000239223,9606.ENSP00000239938,9606.ENSP00000242480,9606.ENSP00000244869,9606.ENSP00000249356,9606.ENSP00000264444,9606.ENSP00000265138,9606.ENSP00000270162,9606.ENSP00000272233,9606.ENSP00000273153,9606.ENSP00000279488,9606.ENSP00000280551,9606.ENSP00000288943,9606.ENSP00000306245,9606.ENSP00000306512,9606.ENSP00000307235,9606.ENSP00000307305,…	KRT20,HBEGF,DUSP1,EGR1,EGR2,EREG,DNAJB9,MXD1,ARRDC3,SIK1,RHOB,CSRNP1,DUSP6,SEC24D,DUSP2,FOS,CXCL8,EIF2AK3,DDIT4,TNFRSF12A,PCP4,ATF3,INSIG1,PTGS2,CTGF,JUN,ANKRD1,SLC25A25,ERRFI1,GPCPD1,EDN1,XDH,ZMYM5,CYR61,KLF6,TIPARP,MANF,NR4A1,DDIT3,IER2,VEGFA
GO:0009968	negative regulation of signal transduction	19	1160	0.6	7.25e-06	9606.ENSP00000200453,9606.ENSP00000239223,9606.ENSP00000239938,9606.ENSP00000249356,9606.ENSP00000252809,9606.ENSP00000263339,9606.ENSP00000265138,9606.ENSP00000279488,9606.ENSP00000288943,9606.ENSP00000306512,9606.ENSP00000307305,9606.ENSP00000344352,9606.ENSP00000344741,9606.ENSP00000356438,9606.ENSP00000356529,9606.ENSP00000366702,9606.ENSP00000368727,9606.ENSP00000409555,9606.ENSP00000448665	PPP1R15A,DUSP1,EGR1,DNAJB9,GDF15,IL1A,ARRDC3,DUSP6,DUSP2,CXCL8,DDIT4,ATF3,INSIG1,PTGS2,RGS16,ERRFI1,XDH,HERPUD1,DDIT3
GO:0080090	regulation of primary metabolic process	47	5982	0.28	7.25e-06	9606.ENSP00000200453,9606.ENSP00000230990,9606.ENSP00000239223,9606.ENSP00000239938,9606.ENSP00000242480,9606.ENSP00000244869,9606.ENSP00000252809,9606.ENSP00000256458,9606.ENSP00000263339,9606.ENSP00000264444,9606.ENSP00000265138,9606.ENSP00000270162,9606.ENSP00000273153,9606.ENSP00000273668,9606.ENSP00000279488,9606.ENSP00000288943,9606.ENSP00000306245,9606.ENSP00000307235,9606.ENSP00000307305,…	PPP1R15A,HBEGF,DUSP1,EGR1,EGR2,EREG,GDF15,IRAK2,IL1A,MXD1,ARRDC3,SIK1,CSRNP1,EAF2,DUSP6,DUSP2,FOS,EIF2AK3,DDIT4,ZFAND2A,YOD1,ATF3,INSIG1,RASSF1,SERTAD1,TSC22D2,PTGS2,CTGF,GADD45A,JUN,ANKRD1,ZBTB43,ERRFI1,EDN1,XDH,E2F6,ZMYM5,CYR61,HERPUD1,KLF6,TIPARP,NR4A1,DDIT3,IER2,ZFP36,DNAJC3,VEGFA
GO:0033993	response to lipid	16	825	0.68	8.69e-06	9606.ENSP00000239223,9606.ENSP00000256458,9606.ENSP00000296026,9606.ENSP00000306245,9606.ENSP00000306512,9606.ENSP00000307305,9606.ENSP00000344741,9606.ENSP00000356438,9606.ENSP00000356954,9606.ENSP00000360266,9606.ENSP00000360762,9606.ENSP00000366702,9606.ENSP00000368683,9606.ENSP00000427279,9606.ENSP00000440864,9606.ENSP00000469647	DUSP1,IRAK2,CXCL3,FOS,CXCL8,DDIT4,INSIG1,PTGS2,CTGF,JUN,ANKRD1,ERRFI1,EDN1,CXCL2,NR4A1,ZFP36
GO:0009605	response to external stimulus	26	2152	0.47	9.11e-06	9606.ENSP00000167588,9606.ENSP00000230990,9606.ENSP00000239938,9606.ENSP00000242480,9606.ENSP00000252809,9606.ENSP00000256458,9606.ENSP00000270162,9606.ENSP00000296026,9606.ENSP00000306245,9606.ENSP00000306512,9606.ENSP00000307235,9606.ENSP00000307305,9606.ENSP00000344352,9606.ENSP00000356438,9606.ENSP00000360025,9606.ENSP00000360266,9606.ENSP00000360762,9606.ENSP00000362159,9606.ENSP00000368683,…	KRT20,HBEGF,EGR1,EGR2,GDF15,IRAK2,SIK1,CXCL3,FOS,CXCL8,EIF2AK3,DDIT4,ATF3,PTGS2,GADD45A,JUN,ANKRD1,SLC25A25,EDN1,CYR61,CXCL2,NR4A1,DDIT3,ZFP36,DNAJC3,VEGFA
GO:0048646	anatomical structure formation involved in morphogenesis	16	831	0.67	9.28e-06	9606.ENSP00000239223,9606.ENSP00000242480,9606.ENSP00000244869,9606.ENSP00000272233,9606.ENSP00000288943,9606.ENSP00000306512,9606.ENSP00000307235,9606.ENSP00000326737,9606.ENSP00000356438,9606.ENSP00000356954,9606.ENSP00000360266,9606.ENSP00000360762,9606.ENSP00000368683,9606.ENSP00000398736,9606.ENSP00000440864,9606.ENSP00000478570	DUSP1,EGR2,EREG,RHOB,DUSP2,CXCL8,EIF2AK3,TNFRSF12A,PTGS2,CTGF,JUN,ANKRD1,EDN1,CYR61,NR4A1,VEGFA
GO:0009891	positive regulation of biosynthetic process	24	1876	0.5	1.08e-05	9606.ENSP00000200453,9606.ENSP00000239938,9606.ENSP00000242480,9606.ENSP00000244869,9606.ENSP00000263339,9606.ENSP00000273153,9606.ENSP00000273668,9606.ENSP00000306245,9606.ENSP00000307235,9606.ENSP00000344352,9606.ENSP00000344741,9606.ENSP00000350633,9606.ENSP00000356438,9606.ENSP00000356954,9606.ENSP00000360266,9606.ENSP00000360762,9606.ENSP00000368683,9606.ENSP00000398736,9606.ENSP00000419923,…	PPP1R15A,EGR1,EGR2,EREG,IL1A,CSRNP1,EAF2,FOS,EIF2AK3,ATF3,INSIG1,SERTAD1,PTGS2,CTGF,JUN,ANKRD1,EDN1,CYR61,KLF6,NR4A1,DDIT3,IER2,DNAJC3,VEGFA
GO:0060255	regulation of macromolecule metabolic process	47	6072	0.28	1.08e-05	9606.ENSP00000200453,9606.ENSP00000230990,9606.ENSP00000239223,9606.ENSP00000239938,9606.ENSP00000242480,9606.ENSP00000244869,9606.ENSP00000252809,9606.ENSP00000256458,9606.ENSP00000263339,9606.ENSP00000264444,9606.ENSP00000265138,9606.ENSP00000270162,9606.ENSP00000273153,9606.ENSP00000273668,9606.ENSP00000279488,9606.ENSP00000288943,9606.ENSP00000306245,9606.ENSP00000307235,9606.ENSP00000307305,…	PPP1R15A,HBEGF,DUSP1,EGR1,EGR2,EREG,GDF15,IRAK2,IL1A,MXD1,ARRDC3,SIK1,CSRNP1,EAF2,DUSP6,DUSP2,FOS,EIF2AK3,DDIT4,ZFAND2A,YOD1,ATF3,INSIG1,RASSF1,SERTAD1,TSC22D2,PTGS2,CTGF,GADD45A,JUN,ANKRD1,ZBTB43,ERRFI1,EDN1,XDH,E2F6,ZMYM5,CYR61,HERPUD1,KLF6,TIPARP,NR4A1,DDIT3,IER2,ZFP36,DNAJC3,VEGFA
GO:0031960	response to corticosteroid	8	154	1.1	1.12e-05	9606.ENSP00000239223,9606.ENSP00000306245,9606.ENSP00000307305,9606.ENSP00000356438,9606.ENSP00000356954,9606.ENSP00000366702,9606.ENSP00000368683,9606.ENSP00000469647	DUSP1,FOS,DDIT4,PTGS2,CTGF,ERRFI1,EDN1,ZFP36
GO:0032270	positive regulation of cellular protein metabolic process	21	1496	0.54	1.61e-05	9606.ENSP00000200453,9606.ENSP00000230990,9606.ENSP00000239938,9606.ENSP00000244869,9606.ENSP00000252809,9606.ENSP00000256458,9606.ENSP00000265138,9606.ENSP00000279488,9606.ENSP00000307235,9606.ENSP00000314619,9606.ENSP00000349547,9606.ENSP00000356438,9606.ENSP00000356954,9606.ENSP00000360025,9606.ENSP00000360266,9606.ENSP00000368683,9606.ENSP00000368727,9606.ENSP00000398736,9606.ENSP00000409555,…	PPP1R15A,HBEGF,EGR1,EREG,GDF15,IRAK2,ARRDC3,DUSP6,EIF2AK3,ZFAND2A,RASSF1,PTGS2,CTGF,GADD45A,JUN,EDN1,XDH,CYR61,HERPUD1,DNAJC3,VEGFA
GO:0032496	response to lipopolysaccharide	10	298	0.91	1.67e-05	9606.ENSP00000256458,9606.ENSP00000296026,9606.ENSP00000306245,9606.ENSP00000306512,9606.ENSP00000356438,9606.ENSP00000360266,9606.ENSP00000360762,9606.ENSP00000368683,9606.ENSP00000427279,9606.ENSP00000469647	IRAK2,CXCL3,FOS,CXCL8,PTGS2,JUN,ANKRD1,EDN1,CXCL2,ZFP36
GO:1902624	positive regulation of neutrophil migration	5	34	1.56	1.73e-05	9606.ENSP00000263339,9606.ENSP00000296026,9606.ENSP00000306512,9606.ENSP00000368683,9606.ENSP00000427279	IL1A,CXCL3,CXCL8,EDN1,CXCL2
GO:0050790	regulation of catalytic activity	26	2249	0.45	1.91e-05	9606.ENSP00000200453,9606.ENSP00000239223,9606.ENSP00000239938,9606.ENSP00000244869,9606.ENSP00000252809,9606.ENSP00000256458,9606.ENSP00000265138,9606.ENSP00000279488,9606.ENSP00000288943,9606.ENSP00000307235,9606.ENSP00000350633,9606.ENSP00000356438,9606.ENSP00000356529,9606.ENSP00000356954,9606.ENSP00000360025,9606.ENSP00000360266,9606.ENSP00000366702,9606.ENSP00000368683,9606.ENSP00000368727,…	PPP1R15A,DUSP1,EGR1,EREG,GDF15,IRAK2,ARRDC3,DUSP6,DUSP2,EIF2AK3,SERTAD1,PTGS2,RGS16,CTGF,GADD45A,JUN,ERRFI1,EDN1,XDH,VCPKMT,CYR61,HERPUD1,FICD,ZFP36,DNAJC3,VEGFA
GO:0051726	regulation of cell cycle	18	1129	0.59	2.03e-05	9606.ENSP00000200453,9606.ENSP00000239223,9606.ENSP00000244869,9606.ENSP00000263339,9606.ENSP00000270162,9606.ENSP00000272233,9606.ENSP00000306512,9606.ENSP00000349547,9606.ENSP00000350633,9606.ENSP00000356438,9606.ENSP00000356954,9606.ENSP00000360025,9606.ENSP00000360266,9606.ENSP00000368683,9606.ENSP00000370936,9606.ENSP00000403683,9606.ENSP00000440864,9606.ENSP00000448665	PPP1R15A,DUSP1,EREG,IL1A,SIK1,RHOB,CXCL8,RASSF1,SERTAD1,PTGS2,CTGF,GADD45A,JUN,EDN1,E2F6,NABP1,NR4A1,DDIT3
GO:0051716	cellular response to stimulus	47	6212	0.27	2.06e-05	9606.ENSP00000167588,9606.ENSP00000200453,9606.ENSP00000230990,9606.ENSP00000239223,9606.ENSP00000239938,9606.ENSP00000242480,9606.ENSP00000244869,9606.ENSP00000249356,9606.ENSP00000252809,9606.ENSP00000256458,9606.ENSP00000263339,9606.ENSP00000270162,9606.ENSP00000272233,9606.ENSP00000273153,9606.ENSP00000279488,9606.ENSP00000296026,9606.ENSP00000306245,9606.ENSP00000306512,9606.ENSP00000307235,…	KRT20,PPP1R15A,HBEGF,DUSP1,EGR1,EGR2,EREG,DNAJB9,GDF15,IRAK2,IL1A,SIK1,RHOB,CSRNP1,DUSP6,CXCL3,FOS,CXCL8,EIF2AK3,DDIT4,ZFAND2A,TNFRSF12A,YOD1,PCP4,ATF3,INSIG1,RASSF1,PTGS2,RGS16,CTGF,GADD45A,JUN,ANKRD1,RND3,ERRFI1,EDN1,NABP1,HERPUD1,TIPARP,CDKN2AIP,CXCL2,NR4A1,FICD,DDIT3,ZFP36,DNAJC3,VEGFA
GO:0009892	negative regulation of metabolic process	29	2762	0.41	2.33e-05	9606.ENSP00000200453,9606.ENSP00000230990,9606.ENSP00000239223,9606.ENSP00000239938,9606.ENSP00000244869,9606.ENSP00000264444,9606.ENSP00000270162,9606.ENSP00000279488,9606.ENSP00000288943,9606.ENSP00000307235,9606.ENSP00000307305,9606.ENSP00000326813,9606.ENSP00000344352,9606.ENSP00000344741,9606.ENSP00000356438,9606.ENSP00000356954,9606.ENSP00000360025,9606.ENSP00000360266,9606.ENSP00000360762,…	PPP1R15A,HBEGF,DUSP1,EGR1,EREG,MXD1,SIK1,DUSP6,DUSP2,EIF2AK3,DDIT4,YOD1,ATF3,INSIG1,PTGS2,CTGF,GADD45A,JUN,ANKRD1,ERRFI1,EDN1,XDH,E2F6,HERPUD1,TIPARP,DDIT3,ZFP36,DNAJC3,VEGFA
GO:0031324	negative regulation of cellular metabolic process	27	2463	0.43	2.8e-05	9606.ENSP00000200453,9606.ENSP00000230990,9606.ENSP00000239223,9606.ENSP00000239938,9606.ENSP00000244869,9606.ENSP00000264444,9606.ENSP00000270162,9606.ENSP00000279488,9606.ENSP00000288943,9606.ENSP00000307235,9606.ENSP00000307305,9606.ENSP00000326813,9606.ENSP00000344352,9606.ENSP00000344741,9606.ENSP00000356438,9606.ENSP00000360025,9606.ENSP00000360266,9606.ENSP00000360762,9606.ENSP00000366702,…	PPP1R15A,HBEGF,DUSP1,EGR1,EREG,MXD1,SIK1,DUSP6,DUSP2,EIF2AK3,DDIT4,YOD1,ATF3,INSIG1,PTGS2,GADD45A,JUN,ANKRD1,ERRFI1,EDN1,XDH,E2F6,HERPUD1,DDIT3,ZFP36,DNAJC3,VEGFA
GO:0031328	positive regulation of cellular biosynthetic process	23	1846	0.48	2.8e-05	9606.ENSP00000200453,9606.ENSP00000239938,9606.ENSP00000242480,9606.ENSP00000244869,9606.ENSP00000263339,9606.ENSP00000273153,9606.ENSP00000273668,9606.ENSP00000306245,9606.ENSP00000307235,9606.ENSP00000344352,9606.ENSP00000344741,9606.ENSP00000350633,9606.ENSP00000356438,9606.ENSP00000360266,9606.ENSP00000360762,9606.ENSP00000368683,9606.ENSP00000398736,9606.ENSP00000419923,9606.ENSP00000440864,…	PPP1R15A,EGR1,EGR2,EREG,IL1A,CSRNP1,EAF2,FOS,EIF2AK3,ATF3,INSIG1,SERTAD1,PTGS2,JUN,ANKRD1,EDN1,CYR61,KLF6,NR4A1,DDIT3,IER2,DNAJC3,VEGFA
GO:1901700	response to oxygen-containing compound	20	1427	0.54	2.87e-05	9606.ENSP00000239223,9606.ENSP00000239938,9606.ENSP00000242480,9606.ENSP00000244869,9606.ENSP00000256458,9606.ENSP00000272233,9606.ENSP00000296026,9606.ENSP00000306245,9606.ENSP00000306512,9606.ENSP00000307305,9606.ENSP00000344741,9606.ENSP00000356438,9606.ENSP00000356954,9606.ENSP00000360266,9606.ENSP00000360762,9606.ENSP00000366702,9606.ENSP00000368683,9606.ENSP00000427279,9606.ENSP00000440864,…	DUSP1,EGR1,EGR2,EREG,IRAK2,RHOB,CXCL3,FOS,CXCL8,DDIT4,INSIG1,PTGS2,CTGF,JUN,ANKRD1,ERRFI1,EDN1,CXCL2,NR4A1,ZFP36
GO:0031323	regulation of cellular metabolic process	46	6082	0.27	2.93e-05	9606.ENSP00000200453,9606.ENSP00000230990,9606.ENSP00000239223,9606.ENSP00000239938,9606.ENSP00000242480,9606.ENSP00000244869,9606.ENSP00000252809,9606.ENSP00000256458,9606.ENSP00000263339,9606.ENSP00000264444,9606.ENSP00000265138,9606.ENSP00000270162,9606.ENSP00000273153,9606.ENSP00000273668,9606.ENSP00000279488,9606.ENSP00000288943,9606.ENSP00000306245,9606.ENSP00000307235,9606.ENSP00000307305,…	PPP1R15A,HBEGF,DUSP1,EGR1,EGR2,EREG,GDF15,IRAK2,IL1A,MXD1,ARRDC3,SIK1,CSRNP1,EAF2,DUSP6,DUSP2,FOS,EIF2AK3,DDIT4,ZFAND2A,YOD1,ATF3,INSIG1,RASSF1,SERTAD1,TSC22D2,PTGS2,CTGF,GADD45A,JUN,ANKRD1,ZBTB43,ERRFI1,EDN1,XDH,E2F6,ZMYM5,CYR61,HERPUD1,KLF6,NR4A1,DDIT3,IER2,ZFP36,DNAJC3,VEGFA
GO:0043408	regulation of MAPK cascade	14	712	0.68	3.6e-05	9606.ENSP00000239223,9606.ENSP00000252809,9606.ENSP00000256458,9606.ENSP00000279488,9606.ENSP00000288943,9606.ENSP00000344352,9606.ENSP00000356954,9606.ENSP00000360025,9606.ENSP00000360266,9606.ENSP00000366702,9606.ENSP00000368683,9606.ENSP00000368727,9606.ENSP00000398736,9606.ENSP00000478570	DUSP1,GDF15,IRAK2,DUSP6,DUSP2,ATF3,CTGF,GADD45A,JUN,ERRFI1,EDN1,XDH,CYR61,VEGFA
GO:0042127	regulation of cell population proliferation	21	1594	0.51	3.7e-05	9606.ENSP00000230990,9606.ENSP00000239223,9606.ENSP00000239938,9606.ENSP00000244869,9606.ENSP00000263339,9606.ENSP00000273668,9606.ENSP00000296026,9606.ENSP00000306512,9606.ENSP00000344352,9606.ENSP00000350633,9606.ENSP00000356438,9606.ENSP00000356954,9606.ENSP00000360266,9606.ENSP00000366702,9606.ENSP00000368683,9606.ENSP00000368727,9606.ENSP00000398736,9606.ENSP00000427279,9606.ENSP00000440864,…	HBEGF,DUSP1,EGR1,EREG,IL1A,EAF2,CXCL3,CXCL8,ATF3,SERTAD1,PTGS2,CTGF,JUN,ERRFI1,EDN1,XDH,CYR61,CXCL2,NR4A1,ZFP36,VEGFA
GO:0048584	positive regulation of response to stimulus	24	2054	0.46	4.28e-05	9606.ENSP00000200453,9606.ENSP00000230990,9606.ENSP00000244869,9606.ENSP00000252809,9606.ENSP00000256458,9606.ENSP00000279488,9606.ENSP00000296026,9606.ENSP00000306512,9606.ENSP00000321026,9606.ENSP00000326737,9606.ENSP00000344352,9606.ENSP00000356438,9606.ENSP00000356954,9606.ENSP00000360025,9606.ENSP00000360266,9606.ENSP00000360762,9606.ENSP00000368683,9606.ENSP00000368727,9606.ENSP00000398736,…	PPP1R15A,HBEGF,EREG,GDF15,IRAK2,DUSP6,CXCL3,CXCL8,LURAP1L,TNFRSF12A,ATF3,PTGS2,CTGF,GADD45A,JUN,ANKRD1,EDN1,XDH,CYR61,HERPUD1,CDKN2AIP,CXCL2,DDIT3,VEGFA
GO:0010557	positive regulation of macromolecule biosynthetic process	22	1758	0.49	4.36e-05	9606.ENSP00000200453,9606.ENSP00000239938,9606.ENSP00000242480,9606.ENSP00000244869,9606.ENSP00000263339,9606.ENSP00000273153,9606.ENSP00000273668,9606.ENSP00000306245,9606.ENSP00000307235,9606.ENSP00000344352,9606.ENSP00000344741,9606.ENSP00000350633,9606.ENSP00000360266,9606.ENSP00000360762,9606.ENSP00000368683,9606.ENSP00000398736,9606.ENSP00000419923,9606.ENSP00000440864,9606.ENSP00000448665,…	PPP1R15A,EGR1,EGR2,EREG,IL1A,CSRNP1,EAF2,FOS,EIF2AK3,ATF3,INSIG1,SERTAD1,JUN,ANKRD1,EDN1,CYR61,KLF6,NR4A1,DDIT3,IER2,DNAJC3,VEGFA
GO:1903573	negative regulation of response to endoplasmic reticulum stress	5	44	1.44	4.52e-05	9606.ENSP00000200453,9606.ENSP00000249356,9606.ENSP00000326813,9606.ENSP00000409555,9606.ENSP00000473631	PPP1R15A,DNAJB9,YOD1,HERPUD1,DNAJC3
GO:0009889	regulation of biosynthetic process	37	4337	0.32	4.71e-05	9606.ENSP00000200453,9606.ENSP00000230990,9606.ENSP00000239223,9606.ENSP00000239938,9606.ENSP00000242480,9606.ENSP00000244869,9606.ENSP00000252809,9606.ENSP00000256458,9606.ENSP00000263339,9606.ENSP00000264444,9606.ENSP00000270162,9606.ENSP00000273153,9606.ENSP00000273668,9606.ENSP00000306245,9606.ENSP00000307235,9606.ENSP00000307305,9606.ENSP00000344352,9606.ENSP00000344741,9606.ENSP00000350633,…	PPP1R15A,HBEGF,DUSP1,EGR1,EGR2,EREG,GDF15,IRAK2,IL1A,MXD1,SIK1,CSRNP1,EAF2,FOS,EIF2AK3,DDIT4,ATF3,INSIG1,SERTAD1,TSC22D2,PTGS2,CTGF,JUN,ANKRD1,ZBTB43,ERRFI1,EDN1,E2F6,ZMYM5,CYR61,KLF6,NR4A1,DDIT3,IER2,ZFP36,DNAJC3,VEGFA
GO:0051338	regulation of transferase activity	16	964	0.61	4.71e-05	9606.ENSP00000239223,9606.ENSP00000239938,9606.ENSP00000244869,9606.ENSP00000252809,9606.ENSP00000256458,9606.ENSP00000265138,9606.ENSP00000279488,9606.ENSP00000288943,9606.ENSP00000350633,9606.ENSP00000360025,9606.ENSP00000366702,9606.ENSP00000368683,9606.ENSP00000398736,9606.ENSP00000469647,9606.ENSP00000473631,9606.ENSP00000478570	DUSP1,EGR1,EREG,GDF15,IRAK2,ARRDC3,DUSP6,DUSP2,SERTAD1,GADD45A,ERRFI1,EDN1,CYR61,ZFP36,DNAJC3,VEGFA
GO:0035994	response to muscle stretch	4	18	1.74	4.72e-05	9606.ENSP00000306245,9606.ENSP00000360266,9606.ENSP00000360762,9606.ENSP00000368683	FOS,JUN,ANKRD1,EDN1
GO:0007165	signal transduction	39	4738	0.3	4.77e-05	9606.ENSP00000200453,9606.ENSP00000230990,9606.ENSP00000239223,9606.ENSP00000239938,9606.ENSP00000244869,9606.ENSP00000249356,9606.ENSP00000252809,9606.ENSP00000256458,9606.ENSP00000263339,9606.ENSP00000270162,9606.ENSP00000272233,9606.ENSP00000273153,9606.ENSP00000279488,9606.ENSP00000296026,9606.ENSP00000306245,9606.ENSP00000306512,9606.ENSP00000307235,9606.ENSP00000307305,9606.ENSP00000326737,…	PPP1R15A,HBEGF,DUSP1,EGR1,EREG,DNAJB9,GDF15,IRAK2,IL1A,SIK1,RHOB,CSRNP1,DUSP6,CXCL3,FOS,CXCL8,EIF2AK3,DDIT4,TNFRSF12A,YOD1,PCP4,ATF3,INSIG1,RASSF1,PTGS2,RGS16,CTGF,GADD45A,JUN,RND3,EDN1,HERPUD1,TIPARP,CXCL2,NR4A1,DDIT3,ZFP36,DNAJC3,VEGFA
GO:0010605	negative regulation of macromolecule metabolic process	27	2558	0.41	4.94e-05	9606.ENSP00000200453,9606.ENSP00000230990,9606.ENSP00000239223,9606.ENSP00000239938,9606.ENSP00000244869,9606.ENSP00000264444,9606.ENSP00000279488,9606.ENSP00000288943,9606.ENSP00000307235,9606.ENSP00000307305,9606.ENSP00000326813,9606.ENSP00000344352,9606.ENSP00000356438,9606.ENSP00000356954,9606.ENSP00000360025,9606.ENSP00000360266,9606.ENSP00000360762,9606.ENSP00000366702,9606.ENSP00000368683,…	PPP1R15A,HBEGF,DUSP1,EGR1,EREG,MXD1,DUSP6,DUSP2,EIF2AK3,DDIT4,YOD1,ATF3,PTGS2,CTGF,GADD45A,JUN,ANKRD1,ERRFI1,EDN1,XDH,E2F6,HERPUD1,TIPARP,DDIT3,ZFP36,DNAJC3,VEGFA
GO:0051384	response to glucocorticoid	7	138	1.09	5.42e-05	9606.ENSP00000239223,9606.ENSP00000306245,9606.ENSP00000307305,9606.ENSP00000356438,9606.ENSP00000366702,9606.ENSP00000368683,9606.ENSP00000469647	DUSP1,FOS,DDIT4,PTGS2,ERRFI1,EDN1,ZFP36
GO:0045944	positive regulation of transcription by RNA polymerase II	17	1104	0.58	5.46e-05	9606.ENSP00000239938,9606.ENSP00000242480,9606.ENSP00000263339,9606.ENSP00000273153,9606.ENSP00000273668,9606.ENSP00000306245,9606.ENSP00000344352,9606.ENSP00000344741,9606.ENSP00000350633,9606.ENSP00000360266,9606.ENSP00000368683,9606.ENSP00000398736,9606.ENSP00000419923,9606.ENSP00000440864,9606.ENSP00000448665,9606.ENSP00000465617,9606.ENSP00000478570	EGR1,EGR2,IL1A,CSRNP1,EAF2,FOS,ATF3,INSIG1,SERTAD1,JUN,EDN1,CYR61,KLF6,NR4A1,DDIT3,IER2,VEGFA
GO:0050793	regulation of developmental process	26	2416	0.42	5.63e-05	9606.ENSP00000239938,9606.ENSP00000244869,9606.ENSP00000252809,9606.ENSP00000263339,9606.ENSP00000270162,9606.ENSP00000272233,9606.ENSP00000273668,9606.ENSP00000279488,9606.ENSP00000306245,9606.ENSP00000306512,9606.ENSP00000307235,9606.ENSP00000326737,9606.ENSP00000329403,9606.ENSP00000344741,9606.ENSP00000356438,9606.ENSP00000356954,9606.ENSP00000360266,9606.ENSP00000360762,9606.ENSP00000366702,…	EGR1,EREG,GDF15,IL1A,SIK1,RHOB,EAF2,DUSP6,FOS,CXCL8,EIF2AK3,TNFRSF12A,PCP4,INSIG1,PTGS2,CTGF,JUN,ANKRD1,ERRFI1,EDN1,XDH,ZMYM5,CYR61,DDIT3,ZFP36,VEGFA
GO:0014070	response to organic cyclic compound	15	873	0.62	6.37e-05	9606.ENSP00000239223,9606.ENSP00000239938,9606.ENSP00000279488,9606.ENSP00000306245,9606.ENSP00000307305,9606.ENSP00000344741,9606.ENSP00000356438,9606.ENSP00000356954,9606.ENSP00000360266,9606.ENSP00000360762,9606.ENSP00000366702,9606.ENSP00000368683,9606.ENSP00000420612,9606.ENSP00000440864,9606.ENSP00000469647	DUSP1,EGR1,DUSP6,FOS,DDIT4,INSIG1,PTGS2,CTGF,JUN,ANKRD1,ERRFI1,EDN1,TIPARP,NR4A1,ZFP36
GO:0044092	negative regulation of molecular function	17	1119	0.57	6.37e-05	9606.ENSP00000200453,9606.ENSP00000239223,9606.ENSP00000256458,9606.ENSP00000270162,9606.ENSP00000279488,9606.ENSP00000288943,9606.ENSP00000356438,9606.ENSP00000360025,9606.ENSP00000360266,9606.ENSP00000366702,9606.ENSP00000379201,9606.ENSP00000409555,9606.ENSP00000446479,9606.ENSP00000448665,9606.ENSP00000469647,9606.ENSP00000473631,9606.ENSP00000478570	PPP1R15A,DUSP1,IRAK2,SIK1,DUSP6,DUSP2,PTGS2,GADD45A,JUN,ERRFI1,VCPKMT,HERPUD1,FICD,DDIT3,ZFP36,DNAJC3,VEGFA
GO:0007154	cell communication	41	5219	0.28	6.62e-05	9606.ENSP00000167588,9606.ENSP00000200453,9606.ENSP00000230990,9606.ENSP00000239223,9606.ENSP00000239938,9606.ENSP00000244869,9606.ENSP00000249356,9606.ENSP00000252809,9606.ENSP00000256458,9606.ENSP00000263339,9606.ENSP00000270162,9606.ENSP00000272233,9606.ENSP00000273153,9606.ENSP00000279488,9606.ENSP00000296026,9606.ENSP00000306245,9606.ENSP00000306512,9606.ENSP00000307235,9606.ENSP00000307305,…	KRT20,PPP1R15A,HBEGF,DUSP1,EGR1,EREG,DNAJB9,GDF15,IRAK2,IL1A,SIK1,RHOB,CSRNP1,DUSP6,CXCL3,FOS,CXCL8,EIF2AK3,DDIT4,TNFRSF12A,YOD1,PCP4,ATF3,INSIG1,RASSF1,PTGS2,RGS16,CTGF,GADD45A,JUN,RND3,EDN1,CYR61,HERPUD1,TIPARP,CXCL2,NR4A1,DDIT3,ZFP36,DNAJC3,VEGFA
GO:0030335	positive regulation of cell migration	11	452	0.77	6.62e-05	9606.ENSP00000230990,9606.ENSP00000263339,9606.ENSP00000272233,9606.ENSP00000296026,9606.ENSP00000306512,9606.ENSP00000356438,9606.ENSP00000360266,9606.ENSP00000368683,9606.ENSP00000398736,9606.ENSP00000427279,9606.ENSP00000478570	HBEGF,IL1A,RHOB,CXCL3,CXCL8,PTGS2,JUN,EDN1,CYR61,CXCL2,VEGFA
GO:0010628	positive regulation of gene expression	22	1826	0.47	6.96e-05	9606.ENSP00000200453,9606.ENSP00000239938,9606.ENSP00000242480,9606.ENSP00000263339,9606.ENSP00000273153,9606.ENSP00000273668,9606.ENSP00000306245,9606.ENSP00000307235,9606.ENSP00000344352,9606.ENSP00000344741,9606.ENSP00000350633,9606.ENSP00000356954,9606.ENSP00000360266,9606.ENSP00000368683,9606.ENSP00000398736,9606.ENSP00000419923,9606.ENSP00000440864,9606.ENSP00000448665,9606.ENSP00000465617,…	PPP1R15A,EGR1,EGR2,IL1A,CSRNP1,EAF2,FOS,EIF2AK3,ATF3,INSIG1,SERTAD1,CTGF,JUN,EDN1,CYR61,KLF6,NR4A1,DDIT3,IER2,ZFP36,DNAJC3,VEGFA
GO:0060537	muscle tissue development	9	284	0.89	7.04e-05	9606.ENSP00000239938,9606.ENSP00000242480,9606.ENSP00000270162,9606.ENSP00000306245,9606.ENSP00000344352,9606.ENSP00000360762,9606.ENSP00000368305,9606.ENSP00000420612,9606.ENSP00000478570	EGR1,EGR2,SIK1,FOS,ATF3,ANKRD1,GPCPD1,TIPARP,VEGFA
GO:0051172	negative regulation of nitrogen compound metabolic process	25	2307	0.42	7.81e-05	9606.ENSP00000200453,9606.ENSP00000230990,9606.ENSP00000239223,9606.ENSP00000239938,9606.ENSP00000244869,9606.ENSP00000264444,9606.ENSP00000279488,9606.ENSP00000288943,9606.ENSP00000307235,9606.ENSP00000307305,9606.ENSP00000326813,9606.ENSP00000344352,9606.ENSP00000356438,9606.ENSP00000360025,9606.ENSP00000360266,9606.ENSP00000360762,9606.ENSP00000366702,9606.ENSP00000368683,9606.ENSP00000368727,…	PPP1R15A,HBEGF,DUSP1,EGR1,EREG,MXD1,DUSP6,DUSP2,EIF2AK3,DDIT4,YOD1,ATF3,PTGS2,GADD45A,JUN,ANKRD1,ERRFI1,EDN1,XDH,E2F6,HERPUD1,DDIT3,ZFP36,DNAJC3,VEGFA
GO:0031326	regulation of cellular biosynthetic process	36	4266	0.31	8.1e-05	9606.ENSP00000200453,9606.ENSP00000230990,9606.ENSP00000239223,9606.ENSP00000239938,9606.ENSP00000242480,9606.ENSP00000244869,9606.ENSP00000252809,9606.ENSP00000256458,9606.ENSP00000263339,9606.ENSP00000264444,9606.ENSP00000270162,9606.ENSP00000273153,9606.ENSP00000273668,9606.ENSP00000306245,9606.ENSP00000307235,9606.ENSP00000307305,9606.ENSP00000344352,9606.ENSP00000344741,9606.ENSP00000350633,…	PPP1R15A,HBEGF,DUSP1,EGR1,EGR2,EREG,GDF15,IRAK2,IL1A,MXD1,SIK1,CSRNP1,EAF2,FOS,EIF2AK3,DDIT4,ATF3,INSIG1,SERTAD1,TSC22D2,PTGS2,JUN,ANKRD1,ZBTB43,ERRFI1,EDN1,E2F6,ZMYM5,CYR61,KLF6,NR4A1,DDIT3,IER2,ZFP36,DNAJC3,VEGFA
GO:0035914	skeletal muscle cell differentiation	5	52	1.37	8.1e-05	9606.ENSP00000239938,9606.ENSP00000242480,9606.ENSP00000306245,9606.ENSP00000344352,9606.ENSP00000360762	EGR1,EGR2,FOS,ATF3,ANKRD1
GO:0031401	positive regulation of protein modification process	17	1149	0.56	8.28e-05	9606.ENSP00000200453,9606.ENSP00000230990,9606.ENSP00000239938,9606.ENSP00000244869,9606.ENSP00000252809,9606.ENSP00000256458,9606.ENSP00000265138,9606.ENSP00000279488,9606.ENSP00000349547,9606.ENSP00000356438,9606.ENSP00000356954,9606.ENSP00000360025,9606.ENSP00000360266,9606.ENSP00000368683,9606.ENSP00000368727,9606.ENSP00000398736,9606.ENSP00000478570	PPP1R15A,HBEGF,EGR1,EREG,GDF15,IRAK2,ARRDC3,DUSP6,RASSF1,PTGS2,CTGF,GADD45A,JUN,EDN1,XDH,CYR61,VEGFA
GO:0045859	regulation of protein kinase activity	14	788	0.64	8.83e-05	9606.ENSP00000239223,9606.ENSP00000239938,9606.ENSP00000244869,9606.ENSP00000252809,9606.ENSP00000256458,9606.ENSP00000279488,9606.ENSP00000288943,9606.ENSP00000350633,9606.ENSP00000360025,9606.ENSP00000366702,9606.ENSP00000368683,9606.ENSP00000398736,9606.ENSP00000473631,9606.ENSP00000478570	DUSP1,EGR1,EREG,GDF15,IRAK2,DUSP6,DUSP2,SERTAD1,GADD45A,ERRFI1,EDN1,CYR61,DNAJC3,VEGFA
GO:0035295	tube development	14	793	0.64	9.41e-05	9606.ENSP00000244869,9606.ENSP00000272233,9606.ENSP00000306512,9606.ENSP00000307235,9606.ENSP00000326737,9606.ENSP00000356438,9606.ENSP00000356954,9606.ENSP00000360266,9606.ENSP00000366702,9606.ENSP00000368683,9606.ENSP00000398736,9606.ENSP00000420612,9606.ENSP00000440864,9606.ENSP00000478570	EREG,RHOB,CXCL8,EIF2AK3,TNFRSF12A,PTGS2,CTGF,JUN,ERRFI1,EDN1,CYR61,TIPARP,NR4A1,VEGFA
GO:0010469	regulation of signaling receptor activity	12	577	0.71	9.78e-05	9606.ENSP00000230990,9606.ENSP00000244869,9606.ENSP00000252809,9606.ENSP00000263339,9606.ENSP00000296026,9606.ENSP00000306512,9606.ENSP00000356954,9606.ENSP00000366702,9606.ENSP00000368683,9606.ENSP00000427279,9606.ENSP00000432799,9606.ENSP00000478570	HBEGF,EREG,GDF15,IL1A,CXCL3,CXCL8,CTGF,ERRFI1,EDN1,CXCL2,MANF,VEGFA
GO:0023052	signaling	40	5108	0.28	9.78e-05	9606.ENSP00000200453,9606.ENSP00000230990,9606.ENSP00000239223,9606.ENSP00000239938,9606.ENSP00000244869,9606.ENSP00000249356,9606.ENSP00000252809,9606.ENSP00000256458,9606.ENSP00000263339,9606.ENSP00000270162,9606.ENSP00000272233,9606.ENSP00000273153,9606.ENSP00000279488,9606.ENSP00000296026,9606.ENSP00000306245,9606.ENSP00000306512,9606.ENSP00000307235,9606.ENSP00000307305,9606.ENSP00000326737,…	PPP1R15A,HBEGF,DUSP1,EGR1,EREG,DNAJB9,GDF15,IRAK2,IL1A,SIK1,RHOB,CSRNP1,DUSP6,CXCL3,FOS,CXCL8,EIF2AK3,DDIT4,TNFRSF12A,YOD1,PCP4,ATF3,INSIG1,RASSF1,PTGS2,RGS16,CTGF,GADD45A,JUN,RND3,EDN1,CYR61,HERPUD1,TIPARP,CXCL2,NR4A1,DDIT3,ZFP36,DNAJC3,VEGFA
GO:0048731	system development	35	4144	0.32	0.00011	9606.ENSP00000167588,9606.ENSP00000230990,9606.ENSP00000239938,9606.ENSP00000242480,9606.ENSP00000244869,9606.ENSP00000249356,9606.ENSP00000265138,9606.ENSP00000270162,9606.ENSP00000272233,9606.ENSP00000273153,9606.ENSP00000306245,9606.ENSP00000306512,9606.ENSP00000307235,9606.ENSP00000307305,9606.ENSP00000326737,9606.ENSP00000329403,9606.ENSP00000344352,9606.ENSP00000344741,9606.ENSP00000356438,…	KRT20,HBEGF,EGR1,EGR2,EREG,DNAJB9,ARRDC3,SIK1,RHOB,CSRNP1,FOS,CXCL8,EIF2AK3,DDIT4,TNFRSF12A,PCP4,ATF3,INSIG1,PTGS2,CTGF,JUN,ANKRD1,SLC25A25,ERRFI1,GPCPD1,EDN1,XDH,CYR61,KLF6,TIPARP,MANF,NR4A1,DDIT3,IER2,VEGFA
GO:0051254	positive regulation of RNA metabolic process	20	1596	0.49	0.00011	9606.ENSP00000239938,9606.ENSP00000242480,9606.ENSP00000263339,9606.ENSP00000273153,9606.ENSP00000273668,9606.ENSP00000306245,9606.ENSP00000307235,9606.ENSP00000344352,9606.ENSP00000344741,9606.ENSP00000350633,9606.ENSP00000360266,9606.ENSP00000360762,9606.ENSP00000368683,9606.ENSP00000398736,9606.ENSP00000419923,9606.ENSP00000440864,9606.ENSP00000448665,9606.ENSP00000465617,9606.ENSP00000469647,…	EGR1,EGR2,IL1A,CSRNP1,EAF2,FOS,EIF2AK3,ATF3,INSIG1,SERTAD1,JUN,ANKRD1,EDN1,CYR61,KLF6,NR4A1,DDIT3,IER2,ZFP36,VEGFA
GO:0050896	response to stimulus	52	7824	0.21	0.00012	9606.ENSP00000167588,9606.ENSP00000200453,9606.ENSP00000230990,9606.ENSP00000239223,9606.ENSP00000239938,9606.ENSP00000242480,9606.ENSP00000244869,9606.ENSP00000249356,9606.ENSP00000252809,9606.ENSP00000256458,9606.ENSP00000263339,9606.ENSP00000270162,9606.ENSP00000272233,9606.ENSP00000273153,9606.ENSP00000279488,9606.ENSP00000296026,9606.ENSP00000306245,9606.ENSP00000306512,9606.ENSP00000307235,…	KRT20,PPP1R15A,HBEGF,DUSP1,EGR1,EGR2,EREG,DNAJB9,GDF15,IRAK2,IL1A,SIK1,RHOB,CSRNP1,DUSP6,CXCL3,FOS,CXCL8,EIF2AK3,DDIT4,ZFAND2A,TNFRSF12A,YOD1,PCP4,ATF3,INSIG1,RASSF1,TSC22D2,PTGS2,RGS16,CTGF,GADD45A,JUN,ANKRD1,SLC25A25,RND3,ERRFI1,EDN1,CYR61,NABP1,HERPUD1,TIPARP,CDKN2AIP,CXCL2,MANF,NR4A1,FICD,DDIT3,IER2,ZFP36,DNAJC3,VEGFA
GO:0045935	positive regulation of nucleobase-containing compound metabolic process	21	1770	0.46	0.00014	9606.ENSP00000239938,9606.ENSP00000242480,9606.ENSP00000244869,9606.ENSP00000263339,9606.ENSP00000273153,9606.ENSP00000273668,9606.ENSP00000306245,9606.ENSP00000307235,9606.ENSP00000344352,9606.ENSP00000344741,9606.ENSP00000350633,9606.ENSP00000360266,9606.ENSP00000360762,9606.ENSP00000368683,9606.ENSP00000398736,9606.ENSP00000419923,9606.ENSP00000440864,9606.ENSP00000448665,9606.ENSP00000465617,…	EGR1,EGR2,EREG,IL1A,CSRNP1,EAF2,FOS,EIF2AK3,ATF3,INSIG1,SERTAD1,JUN,ANKRD1,EDN1,CYR61,KLF6,NR4A1,DDIT3,IER2,ZFP36,VEGFA
GO:0009719	response to endogenous stimulus	18	1353	0.51	0.00016	9606.ENSP00000239223,9606.ENSP00000239938,9606.ENSP00000242480,9606.ENSP00000244869,9606.ENSP00000252809,9606.ENSP00000270162,9606.ENSP00000306245,9606.ENSP00000306512,9606.ENSP00000307305,9606.ENSP00000356438,9606.ENSP00000356954,9606.ENSP00000360266,9606.ENSP00000360762,9606.ENSP00000366702,9606.ENSP00000368683,9606.ENSP00000440864,9606.ENSP00000465617,9606.ENSP00000469647	DUSP1,EGR1,EGR2,EREG,GDF15,SIK1,FOS,CXCL8,DDIT4,PTGS2,CTGF,JUN,ANKRD1,ERRFI1,EDN1,NR4A1,IER2,ZFP36
GO:0048513	animal organ development	28	2926	0.37	0.00016	9606.ENSP00000167588,9606.ENSP00000230990,9606.ENSP00000239938,9606.ENSP00000242480,9606.ENSP00000244869,9606.ENSP00000249356,9606.ENSP00000265138,9606.ENSP00000270162,9606.ENSP00000273153,9606.ENSP00000306245,9606.ENSP00000306512,9606.ENSP00000307235,9606.ENSP00000307305,9606.ENSP00000344352,9606.ENSP00000344741,9606.ENSP00000356438,9606.ENSP00000356954,9606.ENSP00000360266,9606.ENSP00000360762,…	KRT20,HBEGF,EGR1,EGR2,EREG,DNAJB9,ARRDC3,SIK1,CSRNP1,FOS,CXCL8,EIF2AK3,DDIT4,ATF3,INSIG1,PTGS2,CTGF,JUN,ANKRD1,SLC25A25,ERRFI1,GPCPD1,EDN1,XDH,CYR61,KLF6,TIPARP,VEGFA
GO:0048545	response to steroid hormone	9	324	0.83	0.00017	9606.ENSP00000239223,9606.ENSP00000306245,9606.ENSP00000307305,9606.ENSP00000356438,9606.ENSP00000356954,9606.ENSP00000366702,9606.ENSP00000368683,9606.ENSP00000440864,9606.ENSP00000469647	DUSP1,FOS,DDIT4,PTGS2,CTGF,ERRFI1,EDN1,NR4A1,ZFP36
GO:0050794	regulation of cellular process	62	10484	0.16	0.00017	9606.ENSP00000167588,9606.ENSP00000200453,9606.ENSP00000230990,9606.ENSP00000239223,9606.ENSP00000239938,9606.ENSP00000242480,9606.ENSP00000244869,9606.ENSP00000249356,9606.ENSP00000252809,9606.ENSP00000256458,9606.ENSP00000263339,9606.ENSP00000264444,9606.ENSP00000265138,9606.ENSP00000270162,9606.ENSP00000272233,9606.ENSP00000273153,9606.ENSP00000273668,9606.ENSP00000279488,9606.ENSP00000288943,…	KRT20,PPP1R15A,HBEGF,DUSP1,EGR1,EGR2,EREG,DNAJB9,GDF15,IRAK2,IL1A,MXD1,ARRDC3,SIK1,RHOB,CSRNP1,EAF2,DUSP6,DUSP2,CXCL3,FOS,CXCL8,EIF2AK3,DDIT4,ZFAND2A,LURAP1L,TNFRSF12A,YOD1,PCP4,ATF3,INSIG1,RASSF1,SERTAD1,TSC22D2,PTGS2,RGS16,CTGF,GADD45A,JUN,ANKRD1,ZBTB43,RND3,ERRFI1,EDN1,XDH,E2F6,ZMYM5,CYR61,NABP1,HERPUD1,KLF6,TIPARP,CDKN2AIP,CXCL2,MANF,NR4A1,FICD,DDIT3,IER2,ZFP36,DNAJC3,VEGFA
GO:0045786	negative regulation of cell cycle	11	517	0.72	0.00018	9606.ENSP00000200453,9606.ENSP00000239223,9606.ENSP00000272233,9606.ENSP00000306512,9606.ENSP00000349547,9606.ENSP00000356438,9606.ENSP00000360025,9606.ENSP00000370936,9606.ENSP00000403683,9606.ENSP00000440864,9606.ENSP00000448665	PPP1R15A,DUSP1,RHOB,CXCL8,RASSF1,PTGS2,GADD45A,E2F6,NABP1,NR4A1,DDIT3
GO:1902532	negative regulation of intracellular signal transduction	11	514	0.72	0.00018	9606.ENSP00000239223,9606.ENSP00000265138,9606.ENSP00000279488,9606.ENSP00000288943,9606.ENSP00000307305,9606.ENSP00000344352,9606.ENSP00000356438,9606.ENSP00000366702,9606.ENSP00000368727,9606.ENSP00000409555,9606.ENSP00000448665	DUSP1,ARRDC3,DUSP6,DUSP2,DDIT4,ATF3,PTGS2,ERRFI1,XDH,HERPUD1,DDIT3
GO:0001933	negative regulation of protein phosphorylation	10	422	0.76	0.00019	9606.ENSP00000239223,9606.ENSP00000279488,9606.ENSP00000288943,9606.ENSP00000307305,9606.ENSP00000344352,9606.ENSP00000360025,9606.ENSP00000360266,9606.ENSP00000366702,9606.ENSP00000368727,9606.ENSP00000473631	DUSP1,DUSP6,DUSP2,DDIT4,ATF3,GADD45A,JUN,ERRFI1,XDH,DNAJC3
GO:0009725	response to hormone	14	854	0.6	0.00019	9606.ENSP00000239223,9606.ENSP00000239938,9606.ENSP00000242480,9606.ENSP00000244869,9606.ENSP00000270162,9606.ENSP00000306245,9606.ENSP00000307305,9606.ENSP00000356438,9606.ENSP00000356954,9606.ENSP00000360266,9606.ENSP00000366702,9606.ENSP00000368683,9606.ENSP00000440864,9606.ENSP00000469647	DUSP1,EGR1,EGR2,EREG,SIK1,FOS,DDIT4,PTGS2,CTGF,JUN,ERRFI1,EDN1,NR4A1,ZFP36
GO:1903508	positive regulation of nucleic acid-templated transcription	19	1520	0.49	0.00019	9606.ENSP00000239938,9606.ENSP00000242480,9606.ENSP00000263339,9606.ENSP00000273153,9606.ENSP00000273668,9606.ENSP00000306245,9606.ENSP00000307235,9606.ENSP00000344352,9606.ENSP00000344741,9606.ENSP00000350633,9606.ENSP00000360266,9606.ENSP00000360762,9606.ENSP00000368683,9606.ENSP00000398736,9606.ENSP00000419923,9606.ENSP00000440864,9606.ENSP00000448665,9606.ENSP00000465617,9606.ENSP00000478570	EGR1,EGR2,IL1A,CSRNP1,EAF2,FOS,EIF2AK3,ATF3,INSIG1,SERTAD1,JUN,ANKRD1,EDN1,CYR61,KLF6,NR4A1,DDIT3,IER2,VEGFA
GO:0035556	intracellular signal transduction	19	1528	0.48	0.0002	9606.ENSP00000200453,9606.ENSP00000230990,9606.ENSP00000239223,9606.ENSP00000244869,9606.ENSP00000256458,9606.ENSP00000270162,9606.ENSP00000272233,9606.ENSP00000279488,9606.ENSP00000306512,9606.ENSP00000307235,9606.ENSP00000307305,9606.ENSP00000349547,9606.ENSP00000356954,9606.ENSP00000360025,9606.ENSP00000360266,9606.ENSP00000364886,9606.ENSP00000368683,9606.ENSP00000448665,9606.ENSP00000469647	PPP1R15A,HBEGF,DUSP1,EREG,IRAK2,SIK1,RHOB,DUSP6,CXCL8,EIF2AK3,DDIT4,RASSF1,CTGF,GADD45A,JUN,RND3,EDN1,DDIT3,ZFP36
GO:0090023	positive regulation of neutrophil chemotaxis	4	30	1.51	0.0002	9606.ENSP00000296026,9606.ENSP00000306512,9606.ENSP00000368683,9606.ENSP00000427279	CXCL3,CXCL8,EDN1,CXCL2
GO:0043618	regulation of transcription from RNA polymerase II promoter in response to stress	5	67	1.26	0.00021	9606.ENSP00000239938,9606.ENSP00000344352,9606.ENSP00000360266,9606.ENSP00000448665,9606.ENSP00000478570	EGR1,ATF3,JUN,DDIT3,VEGFA
GO:0010243	response to organonitrogen compound	14	876	0.59	0.00024	9606.ENSP00000239223,9606.ENSP00000239938,9606.ENSP00000242480,9606.ENSP00000244869,9606.ENSP00000249356,9606.ENSP00000306245,9606.ENSP00000326813,9606.ENSP00000356438,9606.ENSP00000356954,9606.ENSP00000360266,9606.ENSP00000366702,9606.ENSP00000368683,9606.ENSP00000409555,9606.ENSP00000440864	DUSP1,EGR1,EGR2,EREG,DNAJB9,FOS,YOD1,PTGS2,CTGF,JUN,ERRFI1,EDN1,HERPUD1,NR4A1
GO:0007519	skeletal muscle tissue development	6	122	1.08	0.00025	9606.ENSP00000239938,9606.ENSP00000242480,9606.ENSP00000306245,9606.ENSP00000344352,9606.ENSP00000360762,9606.ENSP00000368305	EGR1,EGR2,FOS,ATF3,ANKRD1,GPCPD1
GO:0010556	regulation of macromolecule biosynthetic process	34	4143	0.3	0.00027	9606.ENSP00000200453,9606.ENSP00000230990,9606.ENSP00000239223,9606.ENSP00000239938,9606.ENSP00000242480,9606.ENSP00000244869,9606.ENSP00000252809,9606.ENSP00000256458,9606.ENSP00000263339,9606.ENSP00000264444,9606.ENSP00000270162,9606.ENSP00000273153,9606.ENSP00000273668,9606.ENSP00000306245,9606.ENSP00000307235,9606.ENSP00000344352,9606.ENSP00000344741,9606.ENSP00000350633,9606.ENSP00000354543,…	PPP1R15A,HBEGF,DUSP1,EGR1,EGR2,EREG,GDF15,IRAK2,IL1A,MXD1,SIK1,CSRNP1,EAF2,FOS,EIF2AK3,ATF3,INSIG1,SERTAD1,TSC22D2,JUN,ANKRD1,ZBTB43,ERRFI1,EDN1,E2F6,ZMYM5,CYR61,KLF6,NR4A1,DDIT3,IER2,ZFP36,DNAJC3,VEGFA
GO:0071347	cellular response to interleukin-1	6	124	1.07	0.00027	9606.ENSP00000239938,9606.ENSP00000256458,9606.ENSP00000263339,9606.ENSP00000306512,9606.ENSP00000360762,9606.ENSP00000368683	EGR1,IRAK2,IL1A,CXCL8,ANKRD1,EDN1
GO:1901701	cellular response to oxygen-containing compound	14	896	0.58	0.00029	9606.ENSP00000239938,9606.ENSP00000256458,9606.ENSP00000272233,9606.ENSP00000306245,9606.ENSP00000306512,9606.ENSP00000307305,9606.ENSP00000344741,9606.ENSP00000356438,9606.ENSP00000360266,9606.ENSP00000360762,9606.ENSP00000366702,9606.ENSP00000368683,9606.ENSP00000440864,9606.ENSP00000469647	EGR1,IRAK2,RHOB,FOS,CXCL8,DDIT4,INSIG1,PTGS2,JUN,ANKRD1,ERRFI1,EDN1,NR4A1,ZFP36
GO:2000026	regulation of multicellular organismal development	21	1876	0.44	0.00029	9606.ENSP00000239938,9606.ENSP00000263339,9606.ENSP00000272233,9606.ENSP00000273668,9606.ENSP00000279488,9606.ENSP00000306245,9606.ENSP00000306512,9606.ENSP00000307235,9606.ENSP00000326737,9606.ENSP00000329403,9606.ENSP00000356438,9606.ENSP00000356954,9606.ENSP00000360266,9606.ENSP00000360762,9606.ENSP00000366702,9606.ENSP00000368683,9606.ENSP00000368727,9606.ENSP00000398736,9606.ENSP00000448665,…	EGR1,IL1A,RHOB,EAF2,DUSP6,FOS,CXCL8,EIF2AK3,TNFRSF12A,PCP4,PTGS2,CTGF,JUN,ANKRD1,ERRFI1,EDN1,XDH,CYR61,DDIT3,ZFP36,VEGFA
GO:0002687	positive regulation of leukocyte migration	6	127	1.06	0.0003	9606.ENSP00000263339,9606.ENSP00000296026,9606.ENSP00000306512,9606.ENSP00000368683,9606.ENSP00000427279,9606.ENSP00000478570	IL1A,CXCL3,CXCL8,EDN1,CXCL2,VEGFA
GO:0045893	positive regulation of transcription, DNA-templated	18	1435	0.49	0.0003	9606.ENSP00000239938,9606.ENSP00000242480,9606.ENSP00000263339,9606.ENSP00000273153,9606.ENSP00000273668,9606.ENSP00000306245,9606.ENSP00000307235,9606.ENSP00000344352,9606.ENSP00000344741,9606.ENSP00000350633,9606.ENSP00000360266,9606.ENSP00000368683,9606.ENSP00000398736,9606.ENSP00000419923,9606.ENSP00000440864,9606.ENSP00000448665,9606.ENSP00000465617,9606.ENSP00000478570	EGR1,EGR2,IL1A,CSRNP1,EAF2,FOS,EIF2AK3,ATF3,INSIG1,SERTAD1,JUN,EDN1,CYR61,KLF6,NR4A1,DDIT3,IER2,VEGFA
GO:0014706	striated muscle tissue development	8	271	0.86	0.00031	9606.ENSP00000239938,9606.ENSP00000242480,9606.ENSP00000270162,9606.ENSP00000306245,9606.ENSP00000344352,9606.ENSP00000360762,9606.ENSP00000368305,9606.ENSP00000478570	EGR1,EGR2,SIK1,FOS,ATF3,ANKRD1,GPCPD1,VEGFA
GO:0043558	regulation of translational initiation in response to stress	3	10	1.87	0.00031	9606.ENSP00000200453,9606.ENSP00000307235,9606.ENSP00000473631	PPP1R15A,EIF2AK3,DNAJC3
GO:0061448	connective tissue development	7	194	0.95	0.00031	9606.ENSP00000239938,9606.ENSP00000265138,9606.ENSP00000307235,9606.ENSP00000356954,9606.ENSP00000362159,9606.ENSP00000368683,9606.ENSP00000398736	EGR1,ARRDC3,EIF2AK3,CTGF,SLC25A25,EDN1,CYR61
GO:0006366	transcription by RNA polymerase II	13	784	0.61	0.00032	9606.ENSP00000239938,9606.ENSP00000242480,9606.ENSP00000273153,9606.ENSP00000273668,9606.ENSP00000306245,9606.ENSP00000344352,9606.ENSP00000356954,9606.ENSP00000360266,9606.ENSP00000403683,9606.ENSP00000419923,9606.ENSP00000440864,9606.ENSP00000448665,9606.ENSP00000465617	EGR1,EGR2,CSRNP1,EAF2,FOS,ATF3,CTGF,JUN,NABP1,KLF6,NR4A1,DDIT3,IER2
GO:0034097	response to cytokine	15	1035	0.55	0.00032	9606.ENSP00000239938,9606.ENSP00000244869,9606.ENSP00000256458,9606.ENSP00000263339,9606.ENSP00000296026,9606.ENSP00000306245,9606.ENSP00000306512,9606.ENSP00000326737,9606.ENSP00000356438,9606.ENSP00000360266,9606.ENSP00000360762,9606.ENSP00000368683,9606.ENSP00000427279,9606.ENSP00000469647,9606.ENSP00000478570	EGR1,EREG,IRAK2,IL1A,CXCL3,FOS,CXCL8,TNFRSF12A,PTGS2,JUN,ANKRD1,EDN1,CXCL2,ZFP36,VEGFA
GO:0045936	negative regulation of phosphate metabolic process	11	562	0.68	0.00032	9606.ENSP00000200453,9606.ENSP00000239223,9606.ENSP00000279488,9606.ENSP00000288943,9606.ENSP00000307305,9606.ENSP00000344352,9606.ENSP00000360025,9606.ENSP00000360266,9606.ENSP00000366702,9606.ENSP00000368727,9606.ENSP00000473631	PPP1R15A,DUSP1,DUSP6,DUSP2,DDIT4,ATF3,GADD45A,JUN,ERRFI1,XDH,DNAJC3
GO:0070372	regulation of ERK1 and ERK2 cascade	8	274	0.85	0.00032	9606.ENSP00000239223,9606.ENSP00000279488,9606.ENSP00000344352,9606.ENSP00000356954,9606.ENSP00000360266,9606.ENSP00000366702,9606.ENSP00000398736,9606.ENSP00000478570	DUSP1,DUSP6,ATF3,CTGF,JUN,ERRFI1,CYR61,VEGFA
GO:0045937	positive regulation of phosphate metabolic process	15	1052	0.54	0.00037	9606.ENSP00000200453,9606.ENSP00000230990,9606.ENSP00000239938,9606.ENSP00000244869,9606.ENSP00000252809,9606.ENSP00000256458,9606.ENSP00000279488,9606.ENSP00000356438,9606.ENSP00000356954,9606.ENSP00000360025,9606.ENSP00000360266,9606.ENSP00000368683,9606.ENSP00000368727,9606.ENSP00000398736,9606.ENSP00000478570	PPP1R15A,HBEGF,EGR1,EREG,GDF15,IRAK2,DUSP6,PTGS2,CTGF,GADD45A,JUN,EDN1,XDH,CYR61,VEGFA
GO:0010634	positive regulation of epithelial cell migration	6	136	1.03	0.00039	9606.ENSP00000230990,9606.ENSP00000272233,9606.ENSP00000356438,9606.ENSP00000360266,9606.ENSP00000368683,9606.ENSP00000478570	HBEGF,RHOB,PTGS2,JUN,EDN1,VEGFA
GO:0048661	positive regulation of smooth muscle cell proliferation	5	80	1.18	0.00039	9606.ENSP00000230990,9606.ENSP00000244869,9606.ENSP00000356438,9606.ENSP00000360266,9606.ENSP00000368683	HBEGF,EREG,PTGS2,JUN,EDN1
GO:0010647	positive regulation of cell communication	19	1631	0.45	0.0004	9606.ENSP00000230990,9606.ENSP00000244869,9606.ENSP00000252809,9606.ENSP00000256458,9606.ENSP00000279488,9606.ENSP00000321026,9606.ENSP00000326737,9606.ENSP00000344352,9606.ENSP00000356438,9606.ENSP00000356954,9606.ENSP00000360025,9606.ENSP00000360266,9606.ENSP00000360762,9606.ENSP00000368683,9606.ENSP00000368727,9606.ENSP00000398736,9606.ENSP00000427108,9606.ENSP00000448665,9606.ENSP00000478570	HBEGF,EREG,GDF15,IRAK2,DUSP6,LURAP1L,TNFRSF12A,ATF3,PTGS2,CTGF,GADD45A,JUN,ANKRD1,EDN1,XDH,CYR61,CDKN2AIP,DDIT3,VEGFA
GO:0031327	negative regulation of cellular biosynthetic process	18	1479	0.47	0.0004	9606.ENSP00000230990,9606.ENSP00000239223,9606.ENSP00000239938,9606.ENSP00000244869,9606.ENSP00000264444,9606.ENSP00000270162,9606.ENSP00000307235,9606.ENSP00000307305,9606.ENSP00000344352,9606.ENSP00000344741,9606.ENSP00000360266,9606.ENSP00000360762,9606.ENSP00000366702,9606.ENSP00000368683,9606.ENSP00000370936,9606.ENSP00000448665,9606.ENSP00000469647,9606.ENSP00000478570	HBEGF,DUSP1,EGR1,EREG,MXD1,SIK1,EIF2AK3,DDIT4,ATF3,INSIG1,JUN,ANKRD1,ERRFI1,EDN1,E2F6,DDIT3,ZFP36,VEGFA
GO:0043086	negative regulation of catalytic activity	13	809	0.59	0.0004	9606.ENSP00000200453,9606.ENSP00000239223,9606.ENSP00000279488,9606.ENSP00000288943,9606.ENSP00000356438,9606.ENSP00000360025,9606.ENSP00000366702,9606.ENSP00000379201,9606.ENSP00000409555,9606.ENSP00000446479,9606.ENSP00000469647,9606.ENSP00000473631,9606.ENSP00000478570	PPP1R15A,DUSP1,DUSP6,DUSP2,PTGS2,GADD45A,ERRFI1,VCPKMT,HERPUD1,FICD,ZFP36,DNAJC3,VEGFA
GO:2000112	regulation of cellular macromolecule biosynthetic process	33	4050	0.3	0.0004	9606.ENSP00000200453,9606.ENSP00000230990,9606.ENSP00000239223,9606.ENSP00000239938,9606.ENSP00000242480,9606.ENSP00000244869,9606.ENSP00000252809,9606.ENSP00000256458,9606.ENSP00000263339,9606.ENSP00000264444,9606.ENSP00000270162,9606.ENSP00000273153,9606.ENSP00000273668,9606.ENSP00000306245,9606.ENSP00000307235,9606.ENSP00000344352,9606.ENSP00000344741,9606.ENSP00000350633,9606.ENSP00000354543,…	PPP1R15A,HBEGF,DUSP1,EGR1,EGR2,EREG,GDF15,IRAK2,IL1A,MXD1,SIK1,CSRNP1,EAF2,FOS,EIF2AK3,ATF3,INSIG1,SERTAD1,TSC22D2,JUN,ANKRD1,ZBTB43,EDN1,E2F6,ZMYM5,CYR61,KLF6,NR4A1,DDIT3,IER2,ZFP36,DNAJC3,VEGFA
GO:0023056	positive regulation of signaling	19	1638	0.45	0.00042	9606.ENSP00000230990,9606.ENSP00000244869,9606.ENSP00000252809,9606.ENSP00000256458,9606.ENSP00000279488,9606.ENSP00000321026,9606.ENSP00000326737,9606.ENSP00000344352,9606.ENSP00000356438,9606.ENSP00000356954,9606.ENSP00000360025,9606.ENSP00000360266,9606.ENSP00000360762,9606.ENSP00000368683,9606.ENSP00000368727,9606.ENSP00000398736,9606.ENSP00000427108,9606.ENSP00000448665,9606.ENSP00000478570	HBEGF,EREG,GDF15,IRAK2,DUSP6,LURAP1L,TNFRSF12A,ATF3,PTGS2,CTGF,GADD45A,JUN,ANKRD1,EDN1,XDH,CYR61,CDKN2AIP,DDIT3,VEGFA
GO:0001934	positive regulation of protein phosphorylation	14	941	0.56	0.00043	9606.ENSP00000230990,9606.ENSP00000239938,9606.ENSP00000244869,9606.ENSP00000252809,9606.ENSP00000256458,9606.ENSP00000279488,9606.ENSP00000356438,9606.ENSP00000356954,9606.ENSP00000360025,9606.ENSP00000360266,9606.ENSP00000368683,9606.ENSP00000368727,9606.ENSP00000398736,9606.ENSP00000478570	HBEGF,EGR1,EREG,GDF15,IRAK2,DUSP6,PTGS2,CTGF,GADD45A,JUN,EDN1,XDH,CYR61,VEGFA
GO:0007167	enzyme linked receptor protein signaling pathway	12	698	0.62	0.00043	9606.ENSP00000230990,9606.ENSP00000239938,9606.ENSP00000244869,9606.ENSP00000252809,9606.ENSP00000273153,9606.ENSP00000306245,9606.ENSP00000307235,9606.ENSP00000307305,9606.ENSP00000356954,9606.ENSP00000360266,9606.ENSP00000420612,9606.ENSP00000478570	HBEGF,EGR1,EREG,GDF15,CSRNP1,FOS,EIF2AK3,DDIT4,CTGF,JUN,TIPARP,VEGFA
GO:0009967	positive regulation of signal transduction	18	1493	0.47	0.00043	9606.ENSP00000230990,9606.ENSP00000244869,9606.ENSP00000252809,9606.ENSP00000256458,9606.ENSP00000279488,9606.ENSP00000321026,9606.ENSP00000326737,9606.ENSP00000344352,9606.ENSP00000356954,9606.ENSP00000360025,9606.ENSP00000360266,9606.ENSP00000360762,9606.ENSP00000368683,9606.ENSP00000368727,9606.ENSP00000398736,9606.ENSP00000427108,9606.ENSP00000448665,9606.ENSP00000478570	HBEGF,EREG,GDF15,IRAK2,DUSP6,LURAP1L,TNFRSF12A,ATF3,CTGF,GADD45A,JUN,ANKRD1,EDN1,XDH,CYR61,CDKN2AIP,DDIT3,VEGFA
GO:0043281	regulation of cysteine-type endopeptidase activity involved in apoptotic process	7	209	0.91	0.00043	9606.ENSP00000307235,9606.ENSP00000356438,9606.ENSP00000356954,9606.ENSP00000368727,9606.ENSP00000398736,9606.ENSP00000409555,9606.ENSP00000478570	EIF2AK3,PTGS2,CTGF,XDH,CYR61,HERPUD1,VEGFA
GO:0051239	regulation of multicellular organismal process	26	2788	0.36	0.00044	9606.ENSP00000230990,9606.ENSP00000239938,9606.ENSP00000242480,9606.ENSP00000244869,9606.ENSP00000252809,9606.ENSP00000263339,9606.ENSP00000265138,9606.ENSP00000272233,9606.ENSP00000273668,9606.ENSP00000279488,9606.ENSP00000306245,9606.ENSP00000306512,9606.ENSP00000307235,9606.ENSP00000326737,9606.ENSP00000329403,9606.ENSP00000356438,9606.ENSP00000356954,9606.ENSP00000360266,9606.ENSP00000360762,…	HBEGF,EGR1,EGR2,EREG,GDF15,IL1A,ARRDC3,RHOB,EAF2,DUSP6,FOS,CXCL8,EIF2AK3,TNFRSF12A,PCP4,PTGS2,CTGF,JUN,ANKRD1,ERRFI1,EDN1,XDH,CYR61,DDIT3,ZFP36,VEGFA
GO:0009991	response to extracellular stimulus	10	486	0.7	0.00047	9606.ENSP00000167588,9606.ENSP00000252809,9606.ENSP00000306245,9606.ENSP00000307235,9606.ENSP00000344352,9606.ENSP00000356438,9606.ENSP00000360266,9606.ENSP00000362159,9606.ENSP00000448665,9606.ENSP00000469647	KRT20,GDF15,FOS,EIF2AK3,ATF3,PTGS2,JUN,SLC25A25,DDIT3,ZFP36
GO:0031400	negative regulation of protein modification process	11	592	0.66	0.00047	9606.ENSP00000200453,9606.ENSP00000239223,9606.ENSP00000279488,9606.ENSP00000288943,9606.ENSP00000307305,9606.ENSP00000344352,9606.ENSP00000360025,9606.ENSP00000360266,9606.ENSP00000366702,9606.ENSP00000368727,9606.ENSP00000473631	PPP1R15A,DUSP1,DUSP6,DUSP2,DDIT4,ATF3,GADD45A,JUN,ERRFI1,XDH,DNAJC3
GO:0071345	cellular response to cytokine stimulus	14	953	0.56	0.00047	9606.ENSP00000239938,9606.ENSP00000244869,9606.ENSP00000256458,9606.ENSP00000263339,9606.ENSP00000296026,9606.ENSP00000306245,9606.ENSP00000306512,9606.ENSP00000326737,9606.ENSP00000356438,9606.ENSP00000360762,9606.ENSP00000368683,9606.ENSP00000427279,9606.ENSP00000469647,9606.ENSP00000478570	EGR1,EREG,IRAK2,IL1A,CXCL3,FOS,CXCL8,TNFRSF12A,PTGS2,ANKRD1,EDN1,CXCL2,ZFP36,VEGFA
GO:0006357	regulation of transcription by RNA polymerase II	25	2633	0.37	0.00048	9606.ENSP00000239938,9606.ENSP00000242480,9606.ENSP00000252809,9606.ENSP00000263339,9606.ENSP00000264444,9606.ENSP00000273153,9606.ENSP00000273668,9606.ENSP00000306245,9606.ENSP00000344352,9606.ENSP00000344741,9606.ENSP00000350633,9606.ENSP00000354543,9606.ENSP00000360266,9606.ENSP00000360762,9606.ENSP00000362563,9606.ENSP00000368683,9606.ENSP00000370936,9606.ENSP00000372361,9606.ENSP00000398736,…	EGR1,EGR2,GDF15,IL1A,MXD1,CSRNP1,EAF2,FOS,ATF3,INSIG1,SERTAD1,TSC22D2,JUN,ANKRD1,ZBTB43,EDN1,E2F6,ZMYM5,CYR61,KLF6,NR4A1,DDIT3,IER2,ZFP36,VEGFA
GO:0050789	regulation of biological process	63	11116	0.14	0.00048	9606.ENSP00000167588,9606.ENSP00000200453,9606.ENSP00000230990,9606.ENSP00000239223,9606.ENSP00000239938,9606.ENSP00000242480,9606.ENSP00000244869,9606.ENSP00000249356,9606.ENSP00000252809,9606.ENSP00000256458,9606.ENSP00000263339,9606.ENSP00000264444,9606.ENSP00000265138,9606.ENSP00000270162,9606.ENSP00000272233,9606.ENSP00000273153,9606.ENSP00000273668,9606.ENSP00000279488,9606.ENSP00000288943,…	KRT20,PPP1R15A,HBEGF,DUSP1,EGR1,EGR2,EREG,DNAJB9,GDF15,IRAK2,IL1A,MXD1,ARRDC3,SIK1,RHOB,CSRNP1,EAF2,DUSP6,DUSP2,CXCL3,FOS,CXCL8,EIF2AK3,DDIT4,ZFAND2A,LURAP1L,TNFRSF12A,YOD1,PCP4,ATF3,INSIG1,RASSF1,SERTAD1,TSC22D2,PTGS2,RGS16,CTGF,GPR89B,GADD45A,JUN,ANKRD1,ZBTB43,RND3,ERRFI1,EDN1,XDH,E2F6,ZMYM5,CYR61,NABP1,HERPUD1,KLF6,TIPARP,CDKN2AIP,CXCL2,MANF,NR4A1,FICD,DDIT3,IER2,ZFP36,DNAJC3,VEGFA
GO:1901216	positive regulation of neuron death	5	85	1.16	0.00048	9606.ENSP00000239938,9606.ENSP00000306245,9606.ENSP00000307305,9606.ENSP00000360266,9606.ENSP00000448665	EGR1,FOS,DDIT4,JUN,DDIT3
GO:1902533	positive regulation of intracellular signal transduction	14	959	0.55	0.00049	9606.ENSP00000230990,9606.ENSP00000244869,9606.ENSP00000252809,9606.ENSP00000256458,9606.ENSP00000279488,9606.ENSP00000321026,9606.ENSP00000356954,9606.ENSP00000360025,9606.ENSP00000360266,9606.ENSP00000360762,9606.ENSP00000368683,9606.ENSP00000368727,9606.ENSP00000448665,9606.ENSP00000478570	HBEGF,EREG,GDF15,IRAK2,DUSP6,LURAP1L,CTGF,GADD45A,JUN,ANKRD1,EDN1,XDH,DDIT3,VEGFA
GO:0009653	anatomical structure morphogenesis	21	1992	0.41	0.00054	9606.ENSP00000230990,9606.ENSP00000239223,9606.ENSP00000242480,9606.ENSP00000244869,9606.ENSP00000272233,9606.ENSP00000273153,9606.ENSP00000288943,9606.ENSP00000306512,9606.ENSP00000307235,9606.ENSP00000326737,9606.ENSP00000344741,9606.ENSP00000356438,9606.ENSP00000356954,9606.ENSP00000360266,9606.ENSP00000360762,9606.ENSP00000366702,9606.ENSP00000368683,9606.ENSP00000398736,9606.ENSP00000420612,…	HBEGF,DUSP1,EGR2,EREG,RHOB,CSRNP1,DUSP2,CXCL8,EIF2AK3,TNFRSF12A,INSIG1,PTGS2,CTGF,JUN,ANKRD1,ERRFI1,EDN1,CYR61,TIPARP,NR4A1,VEGFA
GO:0043085	positive regulation of catalytic activity	17	1381	0.48	0.00054	9606.ENSP00000200453,9606.ENSP00000239938,9606.ENSP00000244869,9606.ENSP00000252809,9606.ENSP00000256458,9606.ENSP00000265138,9606.ENSP00000279488,9606.ENSP00000307235,9606.ENSP00000356529,9606.ENSP00000356954,9606.ENSP00000360025,9606.ENSP00000360266,9606.ENSP00000366702,9606.ENSP00000368683,9606.ENSP00000368727,9606.ENSP00000398736,9606.ENSP00000478570	PPP1R15A,EGR1,EREG,GDF15,IRAK2,ARRDC3,DUSP6,EIF2AK3,RGS16,CTGF,GADD45A,JUN,ERRFI1,EDN1,XDH,CYR61,VEGFA
GO:0007050	cell cycle arrest	6	149	0.99	0.00056	9606.ENSP00000200453,9606.ENSP00000239223,9606.ENSP00000306512,9606.ENSP00000349547,9606.ENSP00000360025,9606.ENSP00000448665	PPP1R15A,DUSP1,CXCL8,RASSF1,GADD45A,DDIT3
GO:0065007	biological regulation	65	11740	0.13	0.00056	9606.ENSP00000167588,9606.ENSP00000200453,9606.ENSP00000230990,9606.ENSP00000239223,9606.ENSP00000239938,9606.ENSP00000242480,9606.ENSP00000244869,9606.ENSP00000249356,9606.ENSP00000252809,9606.ENSP00000256458,9606.ENSP00000263339,9606.ENSP00000264444,9606.ENSP00000265138,9606.ENSP00000270162,9606.ENSP00000272233,9606.ENSP00000273153,9606.ENSP00000273668,9606.ENSP00000279488,9606.ENSP00000288943,…	KRT20,PPP1R15A,HBEGF,DUSP1,EGR1,EGR2,EREG,DNAJB9,GDF15,IRAK2,IL1A,MXD1,ARRDC3,SIK1,RHOB,CSRNP1,EAF2,DUSP6,DUSP2,CXCL3,FOS,CXCL8,EIF2AK3,DDIT4,ZFAND2A,LURAP1L,TNFRSF12A,YOD1,PCP4,ATF3,INSIG1,RASSF1,SERTAD1,TSC22D2,PTGS2,RGS16,CTGF,GPR89B,GADD45A,JUN,ANKRD1,ZBTB43,RND3,ERRFI1,GPCPD1,EDN1,XDH,E2F6,ZMYM5,VCPKMT,CYR61,NABP1,HERPUD1,KLF6,TIPARP,CDKN2AIP,CXCL2,MANF,NR4A1,FICD,DDIT3,IER2,ZFP36,DNAJC3,VEG…
GO:0071495	cellular response to endogenous stimulus	15	1106	0.52	0.00056	9606.ENSP00000239223,9606.ENSP00000239938,9606.ENSP00000252809,9606.ENSP00000270162,9606.ENSP00000306245,9606.ENSP00000306512,9606.ENSP00000307305,9606.ENSP00000356438,9606.ENSP00000356954,9606.ENSP00000360266,9606.ENSP00000360762,9606.ENSP00000366702,9606.ENSP00000368683,9606.ENSP00000440864,9606.ENSP00000469647	DUSP1,EGR1,GDF15,SIK1,FOS,CXCL8,DDIT4,PTGS2,CTGF,JUN,ANKRD1,ERRFI1,EDN1,NR4A1,ZFP36
GO:0071496	cellular response to external stimulus	8	305	0.81	0.00056	9606.ENSP00000167588,9606.ENSP00000306245,9606.ENSP00000307235,9606.ENSP00000344352,9606.ENSP00000356438,9606.ENSP00000360025,9606.ENSP00000360266,9606.ENSP00000360762	KRT20,FOS,EIF2AK3,ATF3,PTGS2,GADD45A,JUN,ANKRD1
GO:1901342	regulation of vasculature development	8	305	0.81	0.00056	9606.ENSP00000239938,9606.ENSP00000263339,9606.ENSP00000272233,9606.ENSP00000306512,9606.ENSP00000326737,9606.ENSP00000356438,9606.ENSP00000368727,9606.ENSP00000478570	EGR1,IL1A,RHOB,CXCL8,TNFRSF12A,PTGS2,XDH,VEGFA
GO:0002690	positive regulation of leukocyte chemotaxis	5	91	1.13	0.0006	9606.ENSP00000296026,9606.ENSP00000306512,9606.ENSP00000368683,9606.ENSP00000427279,9606.ENSP00000478570	CXCL3,CXCL8,EDN1,CXCL2,VEGFA
GO:0045595	regulation of cell differentiation	19	1695	0.44	0.0006	9606.ENSP00000244869,9606.ENSP00000252809,9606.ENSP00000270162,9606.ENSP00000279488,9606.ENSP00000306245,9606.ENSP00000326737,9606.ENSP00000329403,9606.ENSP00000344741,9606.ENSP00000356438,9606.ENSP00000356954,9606.ENSP00000360266,9606.ENSP00000360762,9606.ENSP00000366702,9606.ENSP00000368683,9606.ENSP00000368727,9606.ENSP00000398736,9606.ENSP00000448665,9606.ENSP00000469647,9606.ENSP00000478570	EREG,GDF15,SIK1,DUSP6,FOS,TNFRSF12A,PCP4,INSIG1,PTGS2,CTGF,JUN,ANKRD1,ERRFI1,EDN1,XDH,CYR61,DDIT3,ZFP36,VEGFA
GO:0071407	cellular response to organic cyclic compound	10	505	0.69	0.0006	9606.ENSP00000239938,9606.ENSP00000307305,9606.ENSP00000344741,9606.ENSP00000356438,9606.ENSP00000360762,9606.ENSP00000366702,9606.ENSP00000368683,9606.ENSP00000420612,9606.ENSP00000440864,9606.ENSP00000469647	EGR1,DDIT4,INSIG1,PTGS2,ANKRD1,ERRFI1,EDN1,TIPARP,NR4A1,ZFP36
GO:0050678	regulation of epithelial cell proliferation	8	311	0.8	0.00061	9606.ENSP00000244869,9606.ENSP00000273668,9606.ENSP00000360266,9606.ENSP00000366702,9606.ENSP00000368727,9606.ENSP00000440864,9606.ENSP00000469647,9606.ENSP00000478570	EREG,EAF2,JUN,ERRFI1,XDH,NR4A1,ZFP36,VEGFA
GO:0051240	positive regulation of multicellular organismal process	18	1551	0.45	0.00062	9606.ENSP00000230990,9606.ENSP00000239938,9606.ENSP00000244869,9606.ENSP00000263339,9606.ENSP00000272233,9606.ENSP00000306245,9606.ENSP00000306512,9606.ENSP00000307235,9606.ENSP00000326737,9606.ENSP00000329403,9606.ENSP00000356438,9606.ENSP00000356954,9606.ENSP00000360266,9606.ENSP00000360762,9606.ENSP00000368683,9606.ENSP00000398736,9606.ENSP00000448665,9606.ENSP00000478570	HBEGF,EGR1,EREG,IL1A,RHOB,FOS,CXCL8,EIF2AK3,TNFRSF12A,PCP4,PTGS2,CTGF,JUN,ANKRD1,EDN1,CYR61,DDIT3,VEGFA
GO:0044093	positive regulation of molecular function	19	1713	0.43	0.00066	9606.ENSP00000200453,9606.ENSP00000239938,9606.ENSP00000244869,9606.ENSP00000252809,9606.ENSP00000256458,9606.ENSP00000265138,9606.ENSP00000279488,9606.ENSP00000307235,9606.ENSP00000356529,9606.ENSP00000356954,9606.ENSP00000360025,9606.ENSP00000360266,9606.ENSP00000366702,9606.ENSP00000368683,9606.ENSP00000368727,9606.ENSP00000398736,9606.ENSP00000409555,9606.ENSP00000448665,9606.ENSP00000478570	PPP1R15A,EGR1,EREG,GDF15,IRAK2,ARRDC3,DUSP6,EIF2AK3,RGS16,CTGF,GADD45A,JUN,ERRFI1,EDN1,XDH,CYR61,HERPUD1,DDIT3,VEGFA
GO:0032501	multicellular organismal process	44	6507	0.22	0.00069	9606.ENSP00000167588,9606.ENSP00000230990,9606.ENSP00000239223,9606.ENSP00000239938,9606.ENSP00000242480,9606.ENSP00000244869,9606.ENSP00000249356,9606.ENSP00000252809,9606.ENSP00000263339,9606.ENSP00000264444,9606.ENSP00000265138,9606.ENSP00000270162,9606.ENSP00000272233,9606.ENSP00000273153,9606.ENSP00000279488,9606.ENSP00000280551,9606.ENSP00000288943,9606.ENSP00000306245,9606.ENSP00000306512,…	KRT20,HBEGF,DUSP1,EGR1,EGR2,EREG,DNAJB9,GDF15,IL1A,MXD1,ARRDC3,SIK1,RHOB,CSRNP1,DUSP6,SEC24D,DUSP2,FOS,CXCL8,EIF2AK3,DDIT4,TNFRSF12A,PCP4,ATF3,INSIG1,PTGS2,RGS16,CTGF,JUN,ANKRD1,SLC25A25,ERRFI1,GPCPD1,EDN1,XDH,ZMYM5,CYR61,KLF6,TIPARP,MANF,NR4A1,DDIT3,IER2,VEGFA
GO:0042035	regulation of cytokine biosynthetic process	5	96	1.11	0.00074	9606.ENSP00000239938,9606.ENSP00000244869,9606.ENSP00000263339,9606.ENSP00000366702,9606.ENSP00000469647	EGR1,EREG,IL1A,ERRFI1,ZFP36
GO:0051094	positive regulation of developmental process	16	1286	0.48	0.00076	9606.ENSP00000239938,9606.ENSP00000252809,9606.ENSP00000263339,9606.ENSP00000272233,9606.ENSP00000306245,9606.ENSP00000306512,9606.ENSP00000326737,9606.ENSP00000329403,9606.ENSP00000356438,9606.ENSP00000356954,9606.ENSP00000360266,9606.ENSP00000360762,9606.ENSP00000368683,9606.ENSP00000398736,9606.ENSP00000469647,9606.ENSP00000478570	EGR1,GDF15,IL1A,RHOB,FOS,CXCL8,TNFRSF12A,PCP4,PTGS2,CTGF,JUN,ANKRD1,EDN1,CYR61,ZFP36,VEGFA
GO:0040012	regulation of locomotion	13	881	0.56	0.00077	9606.ENSP00000230990,9606.ENSP00000244869,9606.ENSP00000263339,9606.ENSP00000265138,9606.ENSP00000272233,9606.ENSP00000296026,9606.ENSP00000306512,9606.ENSP00000356438,9606.ENSP00000360266,9606.ENSP00000368683,9606.ENSP00000398736,9606.ENSP00000427279,9606.ENSP00000478570	HBEGF,EREG,IL1A,ARRDC3,RHOB,CXCL3,CXCL8,PTGS2,JUN,EDN1,CYR61,CXCL2,VEGFA
GO:0009314	response to radiation	9	425	0.71	0.00084	9606.ENSP00000239223,9606.ENSP00000239938,9606.ENSP00000270162,9606.ENSP00000272233,9606.ENSP00000306245,9606.ENSP00000356438,9606.ENSP00000360025,9606.ENSP00000360266,9606.ENSP00000403683	DUSP1,EGR1,SIK1,RHOB,FOS,PTGS2,GADD45A,JUN,NABP1
GO:0019221	cytokine-mediated signaling pathway	11	655	0.61	0.00098	9606.ENSP00000239938,9606.ENSP00000244869,9606.ENSP00000256458,9606.ENSP00000263339,9606.ENSP00000296026,9606.ENSP00000306245,9606.ENSP00000306512,9606.ENSP00000326737,9606.ENSP00000356438,9606.ENSP00000427279,9606.ENSP00000478570	EGR1,EREG,IRAK2,IL1A,CXCL3,FOS,CXCL8,TNFRSF12A,PTGS2,CXCL2,VEGFA
GO:0043405	regulation of MAP kinase activity	8	337	0.76	0.001	9606.ENSP00000239223,9606.ENSP00000252809,9606.ENSP00000256458,9606.ENSP00000279488,9606.ENSP00000288943,9606.ENSP00000360025,9606.ENSP00000368683,9606.ENSP00000478570	DUSP1,GDF15,IRAK2,DUSP6,DUSP2,GADD45A,EDN1,VEGFA
GO:0010468	regulation of gene expression	34	4533	0.26	0.0012	9606.ENSP00000200453,9606.ENSP00000239938,9606.ENSP00000242480,9606.ENSP00000244869,9606.ENSP00000252809,9606.ENSP00000256458,9606.ENSP00000263339,9606.ENSP00000264444,9606.ENSP00000270162,9606.ENSP00000273153,9606.ENSP00000273668,9606.ENSP00000306245,9606.ENSP00000307235,9606.ENSP00000344352,9606.ENSP00000344741,9606.ENSP00000350633,9606.ENSP00000354543,9606.ENSP00000356954,9606.ENSP00000360266,…	PPP1R15A,EGR1,EGR2,EREG,GDF15,IRAK2,IL1A,MXD1,SIK1,CSRNP1,EAF2,FOS,EIF2AK3,ATF3,INSIG1,SERTAD1,TSC22D2,CTGF,JUN,ANKRD1,ZBTB43,EDN1,XDH,E2F6,ZMYM5,CYR61,KLF6,TIPARP,NR4A1,DDIT3,IER2,ZFP36,DNAJC3,VEGFA
GO:0042594	response to starvation	6	175	0.92	0.0012	9606.ENSP00000167588,9606.ENSP00000307235,9606.ENSP00000344352,9606.ENSP00000360266,9606.ENSP00000448665,9606.ENSP00000469647	KRT20,EIF2AK3,ATF3,JUN,DDIT3,ZFP36
GO:0071216	cellular response to biotic stimulus	6	176	0.92	0.0012	9606.ENSP00000256458,9606.ENSP00000306512,9606.ENSP00000307235,9606.ENSP00000360762,9606.ENSP00000448665,9606.ENSP00000469647	IRAK2,CXCL8,EIF2AK3,ANKRD1,DDIT3,ZFP36
GO:0071385	cellular response to glucocorticoid stimulus	4	55	1.25	0.0012	9606.ENSP00000307305,9606.ENSP00000366702,9606.ENSP00000368683,9606.ENSP00000469647	DDIT4,ERRFI1,EDN1,ZFP36
GO:0009607	response to biotic stimulus	15	1206	0.48	0.0013	9606.ENSP00000239938,9606.ENSP00000256458,9606.ENSP00000296026,9606.ENSP00000306245,9606.ENSP00000306512,9606.ENSP00000307235,9606.ENSP00000307305,9606.ENSP00000356438,9606.ENSP00000360266,9606.ENSP00000360762,9606.ENSP00000368683,9606.ENSP00000427279,9606.ENSP00000448665,9606.ENSP00000469647,9606.ENSP00000473631	EGR1,IRAK2,CXCL3,FOS,CXCL8,EIF2AK3,DDIT4,PTGS2,JUN,ANKRD1,EDN1,CXCL2,DDIT3,ZFP36,DNAJC3
GO:0031667	response to nutrient levels	9	455	0.68	0.0013	9606.ENSP00000167588,9606.ENSP00000252809,9606.ENSP00000307235,9606.ENSP00000344352,9606.ENSP00000356438,9606.ENSP00000360266,9606.ENSP00000362159,9606.ENSP00000448665,9606.ENSP00000469647	KRT20,GDF15,EIF2AK3,ATF3,PTGS2,JUN,SLC25A25,DDIT3,ZFP36
GO:0061061	muscle structure development	9	457	0.68	0.0013	9606.ENSP00000230990,9606.ENSP00000239938,9606.ENSP00000242480,9606.ENSP00000270162,9606.ENSP00000306245,9606.ENSP00000344352,9606.ENSP00000360762,9606.ENSP00000368305,9606.ENSP00000478570	HBEGF,EGR1,EGR2,SIK1,FOS,ATF3,ANKRD1,GPCPD1,VEGFA
GO:1904018	positive regulation of vasculature development	6	179	0.91	0.0013	9606.ENSP00000239938,9606.ENSP00000263339,9606.ENSP00000272233,9606.ENSP00000306512,9606.ENSP00000356438,9606.ENSP00000478570	EGR1,IL1A,RHOB,CXCL8,PTGS2,VEGFA
GO:2000145	regulation of cell motility	12	807	0.56	0.0013	9606.ENSP00000230990,9606.ENSP00000244869,9606.ENSP00000263339,9606.ENSP00000272233,9606.ENSP00000296026,9606.ENSP00000306512,9606.ENSP00000356438,9606.ENSP00000360266,9606.ENSP00000368683,9606.ENSP00000398736,9606.ENSP00000427279,9606.ENSP00000478570	HBEGF,EREG,IL1A,RHOB,CXCL3,CXCL8,PTGS2,JUN,EDN1,CYR61,CXCL2,VEGFA
GO:0060326	cell chemotaxis	6	183	0.9	0.0014	9606.ENSP00000230990,9606.ENSP00000296026,9606.ENSP00000306512,9606.ENSP00000427279,9606.ENSP00000440864,9606.ENSP00000478570	HBEGF,CXCL3,CXCL8,CXCL2,NR4A1,VEGFA
GO:0043434	response to peptide hormone	8	362	0.73	0.0015	9606.ENSP00000239938,9606.ENSP00000242480,9606.ENSP00000244869,9606.ENSP00000356438,9606.ENSP00000356954,9606.ENSP00000366702,9606.ENSP00000368683,9606.ENSP00000440864	EGR1,EGR2,EREG,PTGS2,CTGF,ERRFI1,EDN1,NR4A1
GO:0071774	response to fibroblast growth factor	5	115	1.03	0.0015	9606.ENSP00000306512,9606.ENSP00000356954,9606.ENSP00000440864,9606.ENSP00000465617,9606.ENSP00000469647	CXCL8,CTGF,NR4A1,IER2,ZFP36
GO:0007166	cell surface receptor signaling pathway	21	2198	0.37	0.0018	9606.ENSP00000230990,9606.ENSP00000239938,9606.ENSP00000244869,9606.ENSP00000252809,9606.ENSP00000256458,9606.ENSP00000263339,9606.ENSP00000273153,9606.ENSP00000296026,9606.ENSP00000306245,9606.ENSP00000306512,9606.ENSP00000307235,9606.ENSP00000307305,9606.ENSP00000326737,9606.ENSP00000356438,9606.ENSP00000356954,9606.ENSP00000360266,9606.ENSP00000368683,9606.ENSP00000420612,9606.ENSP00000427279,…	HBEGF,EGR1,EREG,GDF15,IRAK2,IL1A,CSRNP1,CXCL3,FOS,CXCL8,EIF2AK3,DDIT4,TNFRSF12A,PTGS2,CTGF,JUN,EDN1,TIPARP,CXCL2,DDIT3,VEGFA
GO:0030154	cell differentiation	28	3457	0.3	0.0018	9606.ENSP00000167588,9606.ENSP00000239938,9606.ENSP00000242480,9606.ENSP00000244869,9606.ENSP00000249356,9606.ENSP00000252809,9606.ENSP00000263339,9606.ENSP00000270162,9606.ENSP00000272233,9606.ENSP00000279488,9606.ENSP00000306245,9606.ENSP00000307235,9606.ENSP00000307305,9606.ENSP00000326737,9606.ENSP00000329403,9606.ENSP00000344352,9606.ENSP00000356438,9606.ENSP00000356954,9606.ENSP00000360266,…	KRT20,EGR1,EGR2,EREG,DNAJB9,GDF15,IL1A,SIK1,RHOB,DUSP6,FOS,EIF2AK3,DDIT4,TNFRSF12A,PCP4,ATF3,PTGS2,CTGF,JUN,ANKRD1,EDN1,CYR61,KLF6,TIPARP,MANF,NR4A1,IER2,VEGFA
GO:0036491	regulation of translation initiation in response to endoplasmic reticulum stress	2	3	2.21	0.0018	9606.ENSP00000307235,9606.ENSP00000473631	EIF2AK3,DNAJC3
GO:1900745	positive regulation of p38MAPK cascade	3	23	1.5	0.0018	9606.ENSP00000360025,9606.ENSP00000368727,9606.ENSP00000478570	GADD45A,XDH,VEGFA
GO:0006355	regulation of transcription, DNA-templated	29	3661	0.29	0.002	9606.ENSP00000239938,9606.ENSP00000242480,9606.ENSP00000244869,9606.ENSP00000252809,9606.ENSP00000256458,9606.ENSP00000263339,9606.ENSP00000264444,9606.ENSP00000270162,9606.ENSP00000273153,9606.ENSP00000273668,9606.ENSP00000306245,9606.ENSP00000307235,9606.ENSP00000344352,9606.ENSP00000344741,9606.ENSP00000350633,9606.ENSP00000354543,9606.ENSP00000360266,9606.ENSP00000360762,9606.ENSP00000362563,…	EGR1,EGR2,EREG,GDF15,IRAK2,IL1A,MXD1,SIK1,CSRNP1,EAF2,FOS,EIF2AK3,ATF3,INSIG1,SERTAD1,TSC22D2,JUN,ANKRD1,ZBTB43,EDN1,E2F6,ZMYM5,CYR61,KLF6,NR4A1,DDIT3,IER2,ZFP36,VEGFA
GO:0070373	negative regulation of ERK1 and ERK2 cascade	4	65	1.18	0.002	9606.ENSP00000239223,9606.ENSP00000279488,9606.ENSP00000344352,9606.ENSP00000366702	DUSP1,DUSP6,ATF3,ERRFI1
GO:0071396	cellular response to lipid	9	486	0.66	0.002	9606.ENSP00000256458,9606.ENSP00000306512,9606.ENSP00000307305,9606.ENSP00000344741,9606.ENSP00000360762,9606.ENSP00000366702,9606.ENSP00000368683,9606.ENSP00000440864,9606.ENSP00000469647	IRAK2,CXCL8,DDIT4,INSIG1,ANKRD1,ERRFI1,EDN1,NR4A1,ZFP36
GO:0007517	muscle organ development	7	287	0.78	0.0021	9606.ENSP00000230990,9606.ENSP00000239938,9606.ENSP00000242480,9606.ENSP00000306245,9606.ENSP00000344352,9606.ENSP00000360762,9606.ENSP00000368305	HBEGF,EGR1,EGR2,FOS,ATF3,ANKRD1,GPCPD1
GO:0071900	regulation of protein serine/threonine kinase activity	9	488	0.65	0.0021	9606.ENSP00000239223,9606.ENSP00000252809,9606.ENSP00000256458,9606.ENSP00000279488,9606.ENSP00000288943,9606.ENSP00000350633,9606.ENSP00000360025,9606.ENSP00000368683,9606.ENSP00000478570	DUSP1,GDF15,IRAK2,DUSP6,DUSP2,SERTAD1,GADD45A,EDN1,VEGFA
GO:0000188	inactivation of MAPK activity	3	26	1.45	0.0024	9606.ENSP00000239223,9606.ENSP00000279488,9606.ENSP00000288943	DUSP1,DUSP6,DUSP2
GO:0007169	transmembrane receptor protein tyrosine kinase signaling pathway	9	499	0.64	0.0024	9606.ENSP00000230990,9606.ENSP00000244869,9606.ENSP00000252809,9606.ENSP00000273153,9606.ENSP00000307235,9606.ENSP00000307305,9606.ENSP00000356954,9606.ENSP00000420612,9606.ENSP00000478570	HBEGF,EREG,GDF15,CSRNP1,EIF2AK3,DDIT4,CTGF,TIPARP,VEGFA
GO:0036003	positive regulation of transcription from RNA polymerase II promoter in response to stress	3	26	1.45	0.0024	9606.ENSP00000344352,9606.ENSP00000448665,9606.ENSP00000478570	ATF3,DDIT3,VEGFA
GO:0008284	positive regulation of cell population proliferation	12	878	0.52	0.0026	9606.ENSP00000230990,9606.ENSP00000239938,9606.ENSP00000244869,9606.ENSP00000344352,9606.ENSP00000350633,9606.ENSP00000356438,9606.ENSP00000356954,9606.ENSP00000360266,9606.ENSP00000368683,9606.ENSP00000398736,9606.ENSP00000440864,9606.ENSP00000478570	HBEGF,EGR1,EREG,ATF3,SERTAD1,PTGS2,CTGF,JUN,EDN1,CYR61,NR4A1,VEGFA
GO:0009612	response to mechanical stimulus	6	210	0.84	0.0026	9606.ENSP00000306245,9606.ENSP00000356438,9606.ENSP00000360025,9606.ENSP00000360266,9606.ENSP00000360762,9606.ENSP00000368683	FOS,PTGS2,GADD45A,JUN,ANKRD1,EDN1
GO:0010575	positive regulation of vascular endothelial growth factor production	3	27	1.43	0.0026	9606.ENSP00000263339,9606.ENSP00000307235,9606.ENSP00000356438	IL1A,EIF2AK3,PTGS2
GO:0019219	regulation of nucleobase-containing compound metabolic process	31	4133	0.26	0.0026	9606.ENSP00000239223,9606.ENSP00000239938,9606.ENSP00000242480,9606.ENSP00000244869,9606.ENSP00000252809,9606.ENSP00000256458,9606.ENSP00000263339,9606.ENSP00000264444,9606.ENSP00000270162,9606.ENSP00000273153,9606.ENSP00000273668,9606.ENSP00000306245,9606.ENSP00000307235,9606.ENSP00000307305,9606.ENSP00000344352,9606.ENSP00000344741,9606.ENSP00000350633,9606.ENSP00000354543,9606.ENSP00000360266,…	DUSP1,EGR1,EGR2,EREG,GDF15,IRAK2,IL1A,MXD1,SIK1,CSRNP1,EAF2,FOS,EIF2AK3,DDIT4,ATF3,INSIG1,SERTAD1,TSC22D2,JUN,ANKRD1,ZBTB43,EDN1,E2F6,ZMYM5,CYR61,KLF6,NR4A1,DDIT3,IER2,ZFP36,VEGFA
GO:0032058	positive regulation of translational initiation in response to stress	2	4	2.09	0.0026	9606.ENSP00000200453,9606.ENSP00000473631	PPP1R15A,DNAJC3
GO:0036293	response to decreased oxygen levels	7	298	0.76	0.0026	9606.ENSP00000239938,9606.ENSP00000307305,9606.ENSP00000356438,9606.ENSP00000356954,9606.ENSP00000360762,9606.ENSP00000368683,9606.ENSP00000478570	EGR1,DDIT4,PTGS2,CTGF,ANKRD1,EDN1,VEGFA
GO:1900101	regulation of endoplasmic reticulum unfolded protein response	3	27	1.43	0.0026	9606.ENSP00000200453,9606.ENSP00000249356,9606.ENSP00000446479	PPP1R15A,DNAJB9,FICD
GO:0001558	regulation of cell growth	8	402	0.69	0.0027	9606.ENSP00000230990,9606.ENSP00000273668,9606.ENSP00000326737,9606.ENSP00000356954,9606.ENSP00000368683,9606.ENSP00000398736,9606.ENSP00000427108,9606.ENSP00000478570	HBEGF,EAF2,TNFRSF12A,CTGF,EDN1,CYR61,CDKN2AIP,VEGFA
GO:0043410	positive regulation of MAPK cascade	9	512	0.63	0.0027	9606.ENSP00000252809,9606.ENSP00000256458,9606.ENSP00000279488,9606.ENSP00000356954,9606.ENSP00000360025,9606.ENSP00000360266,9606.ENSP00000368683,9606.ENSP00000368727,9606.ENSP00000478570	GDF15,IRAK2,DUSP6,CTGF,GADD45A,JUN,EDN1,XDH,VEGFA
GO:0051347	positive regulation of transferase activity	10	630	0.59	0.0027	9606.ENSP00000239938,9606.ENSP00000244869,9606.ENSP00000252809,9606.ENSP00000256458,9606.ENSP00000265138,9606.ENSP00000279488,9606.ENSP00000360025,9606.ENSP00000368683,9606.ENSP00000398736,9606.ENSP00000478570	EGR1,EREG,GDF15,IRAK2,ARRDC3,DUSP6,GADD45A,EDN1,CYR61,VEGFA
GO:0045860	positive regulation of protein kinase activity	9	517	0.63	0.0029	9606.ENSP00000239938,9606.ENSP00000244869,9606.ENSP00000252809,9606.ENSP00000256458,9606.ENSP00000279488,9606.ENSP00000360025,9606.ENSP00000368683,9606.ENSP00000398736,9606.ENSP00000478570	EGR1,EREG,GDF15,IRAK2,DUSP6,GADD45A,EDN1,CYR61,VEGFA
GO:0034612	response to tumor necrosis factor	6	217	0.83	0.003	9606.ENSP00000306512,9606.ENSP00000326737,9606.ENSP00000356438,9606.ENSP00000360762,9606.ENSP00000368683,9606.ENSP00000469647	CXCL8,TNFRSF12A,PTGS2,ANKRD1,EDN1,ZFP36
GO:0035690	cellular response to drug	7	310	0.74	0.003	9606.ENSP00000239938,9606.ENSP00000272233,9606.ENSP00000307305,9606.ENSP00000356438,9606.ENSP00000360762,9606.ENSP00000366702,9606.ENSP00000368683	EGR1,RHOB,DDIT4,PTGS2,ANKRD1,ERRFI1,EDN1
GO:0042493	response to drug	12	900	0.51	0.003	9606.ENSP00000239223,9606.ENSP00000239938,9606.ENSP00000272233,9606.ENSP00000279488,9606.ENSP00000306245,9606.ENSP00000307305,9606.ENSP00000356438,9606.ENSP00000360266,9606.ENSP00000360762,9606.ENSP00000362159,9606.ENSP00000366702,9606.ENSP00000368683	DUSP1,EGR1,RHOB,DUSP6,FOS,DDIT4,PTGS2,JUN,ANKRD1,SLC25A25,ERRFI1,EDN1
GO:0051348	negative regulation of transferase activity	7	310	0.74	0.003	9606.ENSP00000239223,9606.ENSP00000279488,9606.ENSP00000288943,9606.ENSP00000360025,9606.ENSP00000366702,9606.ENSP00000469647,9606.ENSP00000473631	DUSP1,DUSP6,DUSP2,GADD45A,ERRFI1,ZFP36,DNAJC3
GO:0051385	response to mineralocorticoid	3	29	1.4	0.003	9606.ENSP00000306245,9606.ENSP00000356954,9606.ENSP00000368683	FOS,CTGF,EDN1
GO:0071456	cellular response to hypoxia	5	139	0.94	0.003	9606.ENSP00000239938,9606.ENSP00000356438,9606.ENSP00000360762,9606.ENSP00000368683,9606.ENSP00000478570	EGR1,PTGS2,ANKRD1,EDN1,VEGFA
GO:0071560	cellular response to transforming growth factor beta stimulus	5	140	0.94	0.0031	9606.ENSP00000252809,9606.ENSP00000306245,9606.ENSP00000360266,9606.ENSP00000360762,9606.ENSP00000368683	GDF15,FOS,JUN,ANKRD1,EDN1
GO:0045597	positive regulation of cell differentiation	12	908	0.51	0.0032	9606.ENSP00000252809,9606.ENSP00000306245,9606.ENSP00000326737,9606.ENSP00000329403,9606.ENSP00000356438,9606.ENSP00000356954,9606.ENSP00000360266,9606.ENSP00000360762,9606.ENSP00000368683,9606.ENSP00000398736,9606.ENSP00000469647,9606.ENSP00000478570	GDF15,FOS,TNFRSF12A,PCP4,PTGS2,CTGF,JUN,ANKRD1,EDN1,CYR61,ZFP36,VEGFA
GO:0006915	apoptotic process	12	915	0.51	0.0034	9606.ENSP00000167588,9606.ENSP00000200453,9606.ENSP00000263339,9606.ENSP00000272233,9606.ENSP00000273153,9606.ENSP00000273668,9606.ENSP00000307305,9606.ENSP00000326737,9606.ENSP00000360025,9606.ENSP00000360266,9606.ENSP00000398736,9606.ENSP00000448665	KRT20,PPP1R15A,IL1A,RHOB,CSRNP1,EAF2,DDIT4,TNFRSF12A,GADD45A,JUN,CYR61,DDIT3
GO:1902235	regulation of endoplasmic reticulum stress-induced intrinsic apoptotic signaling pathway	3	32	1.36	0.0037	9606.ENSP00000307235,9606.ENSP00000409555,9606.ENSP00000448665	EIF2AK3,HERPUD1,DDIT3
GO:0032874	positive regulation of stress-activated MAPK cascade	5	148	0.92	0.0038	9606.ENSP00000356954,9606.ENSP00000360025,9606.ENSP00000368683,9606.ENSP00000368727,9606.ENSP00000478570	CTGF,GADD45A,EDN1,XDH,VEGFA
GO:0040008	regulation of growth	10	663	0.57	0.0038	9606.ENSP00000230990,9606.ENSP00000252809,9606.ENSP00000273668,9606.ENSP00000279488,9606.ENSP00000326737,9606.ENSP00000356954,9606.ENSP00000368683,9606.ENSP00000398736,9606.ENSP00000427108,9606.ENSP00000478570	HBEGF,GDF15,EAF2,DUSP6,TNFRSF12A,CTGF,EDN1,CYR61,CDKN2AIP,VEGFA
GO:0031668	cellular response to extracellular stimulus	6	235	0.8	0.0042	9606.ENSP00000167588,9606.ENSP00000306245,9606.ENSP00000307235,9606.ENSP00000344352,9606.ENSP00000356438,9606.ENSP00000360266	KRT20,FOS,EIF2AK3,ATF3,PTGS2,JUN
GO:0032792	negative regulation of CREB transcription factor activity	2	6	1.91	0.0042	9606.ENSP00000270162,9606.ENSP00000448665	SIK1,DDIT3
GO:0048008	platelet-derived growth factor receptor signaling pathway	3	34	1.33	0.0042	9606.ENSP00000273153,9606.ENSP00000420612,9606.ENSP00000478570	CSRNP1,TIPARP,VEGFA
GO:0009266	response to temperature stimulus	5	155	0.9	0.0045	9606.ENSP00000263339,9606.ENSP00000306245,9606.ENSP00000307235,9606.ENSP00000356438,9606.ENSP00000473631	IL1A,FOS,EIF2AK3,PTGS2,DNAJC3
GO:0010038	response to metal ion	7	339	0.7	0.0047	9606.ENSP00000239223,9606.ENSP00000263339,9606.ENSP00000306245,9606.ENSP00000307235,9606.ENSP00000356438,9606.ENSP00000360266,9606.ENSP00000368683	DUSP1,IL1A,FOS,EIF2AK3,PTGS2,JUN,EDN1
GO:0097327	response to antineoplastic agent	4	87	1.05	0.0047	9606.ENSP00000239938,9606.ENSP00000307305,9606.ENSP00000366702,9606.ENSP00000368683	EGR1,DDIT4,ERRFI1,EDN1
GO:0043409	negative regulation of MAPK cascade	5	158	0.89	0.0048	9606.ENSP00000239223,9606.ENSP00000279488,9606.ENSP00000288943,9606.ENSP00000344352,9606.ENSP00000366702	DUSP1,DUSP6,DUSP2,ATF3,ERRFI1
GO:0030307	positive regulation of cell growth	5	159	0.89	0.005	9606.ENSP00000230990,9606.ENSP00000326737,9606.ENSP00000368683,9606.ENSP00000427108,9606.ENSP00000478570	HBEGF,TNFRSF12A,EDN1,CDKN2AIP,VEGFA
GO:1905898	positive regulation of response to endoplasmic reticulum stress	3	37	1.3	0.0051	9606.ENSP00000200453,9606.ENSP00000409555,9606.ENSP00000448665	PPP1R15A,HERPUD1,DDIT3
GO:0045766	positive regulation of angiogenesis	5	162	0.88	0.0053	9606.ENSP00000263339,9606.ENSP00000272233,9606.ENSP00000306512,9606.ENSP00000356438,9606.ENSP00000478570	IL1A,RHOB,CXCL8,PTGS2,VEGFA
GO:0071248	cellular response to metal ion	5	162	0.88	0.0053	9606.ENSP00000306245,9606.ENSP00000307235,9606.ENSP00000356438,9606.ENSP00000360266,9606.ENSP00000368683	FOS,EIF2AK3,PTGS2,JUN,EDN1
GO:0010558	negative regulation of macromolecule biosynthetic process	15	1425	0.41	0.0055	9606.ENSP00000230990,9606.ENSP00000239223,9606.ENSP00000239938,9606.ENSP00000244869,9606.ENSP00000264444,9606.ENSP00000307235,9606.ENSP00000344352,9606.ENSP00000360266,9606.ENSP00000360762,9606.ENSP00000366702,9606.ENSP00000368683,9606.ENSP00000370936,9606.ENSP00000448665,9606.ENSP00000469647,9606.ENSP00000478570	HBEGF,DUSP1,EGR1,EREG,MXD1,EIF2AK3,ATF3,JUN,ANKRD1,ERRFI1,EDN1,E2F6,DDIT3,ZFP36,VEGFA
GO:0071548	response to dexamethasone	3	38	1.29	0.0055	9606.ENSP00000307305,9606.ENSP00000366702,9606.ENSP00000368683	DDIT4,ERRFI1,EDN1
GO:0006469	negative regulation of protein kinase activity	6	254	0.76	0.0059	9606.ENSP00000239223,9606.ENSP00000279488,9606.ENSP00000288943,9606.ENSP00000360025,9606.ENSP00000366702,9606.ENSP00000473631	DUSP1,DUSP6,DUSP2,GADD45A,ERRFI1,DNAJC3
GO:0032870	cellular response to hormone stimulus	9	585	0.58	0.0059	9606.ENSP00000239223,9606.ENSP00000270162,9606.ENSP00000306245,9606.ENSP00000307305,9606.ENSP00000360266,9606.ENSP00000366702,9606.ENSP00000368683,9606.ENSP00000440864,9606.ENSP00000469647	DUSP1,SIK1,FOS,DDIT4,JUN,ERRFI1,EDN1,NR4A1,ZFP36
GO:2000379	positive regulation of reactive oxygen species metabolic process	4	94	1.02	0.006	9606.ENSP00000356438,9606.ENSP00000360025,9606.ENSP00000368683,9606.ENSP00000368727	PTGS2,GADD45A,EDN1,XDH
GO:0051409	response to nitrosative stress	2	8	1.79	0.0062	9606.ENSP00000279488,9606.ENSP00000448665	DUSP6,DDIT3
GO:0070417	cellular response to cold	2	8	1.79	0.0062	9606.ENSP00000307235,9606.ENSP00000473631	EIF2AK3,DNAJC3
GO:0010595	positive regulation of endothelial cell migration	4	96	1.01	0.0064	9606.ENSP00000272233,9606.ENSP00000356438,9606.ENSP00000368683,9606.ENSP00000478570	RHOB,PTGS2,EDN1,VEGFA
GO:0009887	animal organ morphogenesis	11	865	0.49	0.007	9606.ENSP00000244869,9606.ENSP00000273153,9606.ENSP00000344741,9606.ENSP00000356954,9606.ENSP00000360266,9606.ENSP00000360762,9606.ENSP00000366702,9606.ENSP00000368683,9606.ENSP00000398736,9606.ENSP00000420612,9606.ENSP00000478570	EREG,CSRNP1,INSIG1,CTGF,JUN,ANKRD1,ERRFI1,EDN1,CYR61,TIPARP,VEGFA
GO:0043406	positive regulation of MAP kinase activity	6	264	0.74	0.007	9606.ENSP00000252809,9606.ENSP00000256458,9606.ENSP00000279488,9606.ENSP00000360025,9606.ENSP00000368683,9606.ENSP00000478570	GDF15,IRAK2,DUSP6,GADD45A,EDN1,VEGFA
GO:0046890	regulation of lipid biosynthetic process	5	174	0.85	0.007	9606.ENSP00000239938,9606.ENSP00000270162,9606.ENSP00000344741,9606.ENSP00000356438,9606.ENSP00000398736	EGR1,SIK1,INSIG1,PTGS2,CYR61
GO:0006954	inflammatory response	8	482	0.61	0.0072	9606.ENSP00000256458,9606.ENSP00000263339,9606.ENSP00000296026,9606.ENSP00000306245,9606.ENSP00000306512,9606.ENSP00000356438,9606.ENSP00000360266,9606.ENSP00000427279	IRAK2,IL1A,CXCL3,FOS,CXCL8,PTGS2,JUN,CXCL2
GO:0031952	regulation of protein autophosphorylation	3	43	1.23	0.0073	9606.ENSP00000360266,9606.ENSP00000366702,9606.ENSP00000478570	JUN,ERRFI1,VEGFA
GO:0006935	chemotaxis	8	491	0.6	0.008	9606.ENSP00000230990,9606.ENSP00000242480,9606.ENSP00000296026,9606.ENSP00000306512,9606.ENSP00000398736,9606.ENSP00000427279,9606.ENSP00000440864,9606.ENSP00000478570	HBEGF,EGR2,CXCL3,CXCL8,CYR61,CXCL2,NR4A1,VEGFA
GO:0010035	response to inorganic substance	8	491	0.6	0.008	9606.ENSP00000239223,9606.ENSP00000263339,9606.ENSP00000272233,9606.ENSP00000306245,9606.ENSP00000307235,9606.ENSP00000356438,9606.ENSP00000360266,9606.ENSP00000368683	DUSP1,IL1A,RHOB,FOS,EIF2AK3,PTGS2,JUN,EDN1
GO:0051707	response to other organism	13	1173	0.43	0.008	9606.ENSP00000239938,9606.ENSP00000256458,9606.ENSP00000296026,9606.ENSP00000306245,9606.ENSP00000306512,9606.ENSP00000307305,9606.ENSP00000356438,9606.ENSP00000360266,9606.ENSP00000360762,9606.ENSP00000368683,9606.ENSP00000427279,9606.ENSP00000469647,9606.ENSP00000473631	EGR1,IRAK2,CXCL3,FOS,CXCL8,DDIT4,PTGS2,JUN,ANKRD1,EDN1,CXCL2,ZFP36,DNAJC3
GO:0072593	reactive oxygen species metabolic process	4	103	0.98	0.008	9606.ENSP00000307305,9606.ENSP00000356954,9606.ENSP00000368683,9606.ENSP00000398736	DDIT4,CTGF,EDN1,CYR61
GO:0022402	cell cycle process	11	890	0.48	0.0084	9606.ENSP00000200453,9606.ENSP00000239223,9606.ENSP00000244869,9606.ENSP00000272233,9606.ENSP00000306512,9606.ENSP00000349547,9606.ENSP00000360025,9606.ENSP00000370936,9606.ENSP00000403683,9606.ENSP00000448665,9606.ENSP00000484532	PPP1R15A,DUSP1,EREG,RHOB,CXCL8,RASSF1,GADD45A,E2F6,NABP1,DDIT3,MIS12
GO:0032879	regulation of localization	21	2524	0.31	0.0084	9606.ENSP00000167588,9606.ENSP00000230990,9606.ENSP00000244869,9606.ENSP00000263339,9606.ENSP00000270162,9606.ENSP00000272233,9606.ENSP00000296026,9606.ENSP00000306512,9606.ENSP00000307235,9606.ENSP00000326813,9606.ENSP00000344741,9606.ENSP00000356438,9606.ENSP00000358233,9606.ENSP00000360266,9606.ENSP00000360762,9606.ENSP00000368683,9606.ENSP00000398736,9606.ENSP00000427279,9606.ENSP00000448665,…	KRT20,HBEGF,EREG,IL1A,SIK1,RHOB,CXCL3,CXCL8,EIF2AK3,YOD1,INSIG1,PTGS2,GPR89B,JUN,ANKRD1,EDN1,CYR61,CXCL2,DDIT3,ZFP36,VEGFA
GO:1901654	response to ketone	5	183	0.82	0.0084	9606.ENSP00000239223,9606.ENSP00000306245,9606.ENSP00000307305,9606.ENSP00000366702,9606.ENSP00000368683	DUSP1,FOS,DDIT4,ERRFI1,EDN1
GO:0032103	positive regulation of response to external stimulus	8	499	0.59	0.0085	9606.ENSP00000244869,9606.ENSP00000256458,9606.ENSP00000296026,9606.ENSP00000306512,9606.ENSP00000356438,9606.ENSP00000368683,9606.ENSP00000427279,9606.ENSP00000478570	EREG,IRAK2,CXCL3,CXCL8,PTGS2,EDN1,CXCL2,VEGFA
GO:0035767	endothelial cell chemotaxis	2	10	1.69	0.0085	9606.ENSP00000440864,9606.ENSP00000478570	NR4A1,VEGFA
GO:0045765	regulation of angiogenesis	6	277	0.72	0.0085	9606.ENSP00000263339,9606.ENSP00000272233,9606.ENSP00000306512,9606.ENSP00000326737,9606.ENSP00000356438,9606.ENSP00000478570	IL1A,RHOB,CXCL8,TNFRSF12A,PTGS2,VEGFA
GO:0061469	regulation of type B pancreatic cell proliferation	2	10	1.69	0.0085	9606.ENSP00000366702,9606.ENSP00000440864	ERRFI1,NR4A1
GO:0070862	negative regulation of protein exit from endoplasmic reticulum	2	10	1.69	0.0085	9606.ENSP00000326813,9606.ENSP00000344741	YOD1,INSIG1
GO:0051781	positive regulation of cell division	4	107	0.96	0.0087	9606.ENSP00000244869,9606.ENSP00000263339,9606.ENSP00000368683,9606.ENSP00000478570	EREG,IL1A,EDN1,VEGFA
GO:0045933	positive regulation of muscle contraction	3	47	1.19	0.0088	9606.ENSP00000356438,9606.ENSP00000356954,9606.ENSP00000368683	PTGS2,CTGF,EDN1
GO:2000113	negative regulation of cellular macromolecule biosynthetic process	14	1348	0.4	0.0088	9606.ENSP00000230990,9606.ENSP00000239223,9606.ENSP00000239938,9606.ENSP00000244869,9606.ENSP00000264444,9606.ENSP00000307235,9606.ENSP00000344352,9606.ENSP00000360266,9606.ENSP00000360762,9606.ENSP00000368683,9606.ENSP00000370936,9606.ENSP00000448665,9606.ENSP00000469647,9606.ENSP00000478570	HBEGF,DUSP1,EGR1,EREG,MXD1,EIF2AK3,ATF3,JUN,ANKRD1,EDN1,E2F6,DDIT3,ZFP36,VEGFA
GO:0044344	cellular response to fibroblast growth factor stimulus	4	108	0.96	0.0089	9606.ENSP00000306512,9606.ENSP00000356954,9606.ENSP00000440864,9606.ENSP00000469647	CXCL8,CTGF,NR4A1,ZFP36
GO:0071214	cellular response to abiotic stimulus	6	282	0.72	0.0089	9606.ENSP00000239938,9606.ENSP00000272233,9606.ENSP00000356438,9606.ENSP00000360025,9606.ENSP00000360762,9606.ENSP00000366702	EGR1,RHOB,PTGS2,GADD45A,ANKRD1,ERRFI1
GO:2001233	regulation of apoptotic signaling pathway	7	388	0.64	0.0089	9606.ENSP00000263339,9606.ENSP00000307235,9606.ENSP00000326737,9606.ENSP00000344352,9606.ENSP00000356438,9606.ENSP00000409555,9606.ENSP00000448665	IL1A,EIF2AK3,TNFRSF12A,ATF3,PTGS2,HERPUD1,DDIT3
GO:0000302	response to reactive oxygen species	5	189	0.81	0.0091	9606.ENSP00000239223,9606.ENSP00000272233,9606.ENSP00000306245,9606.ENSP00000360266,9606.ENSP00000368683	DUSP1,RHOB,FOS,JUN,EDN1
GO:0009409	response to cold	3	48	1.18	0.0091	9606.ENSP00000306245,9606.ENSP00000307235,9606.ENSP00000473631	FOS,EIF2AK3,DNAJC3
GO:0006983	ER overload response	2	11	1.65	0.0095	9606.ENSP00000307235,9606.ENSP00000448665	EIF2AK3,DDIT3
GO:0031953	negative regulation of protein autophosphorylation	2	11	1.65	0.0095	9606.ENSP00000360266,9606.ENSP00000366702	JUN,ERRFI1
GO:0001666	response to hypoxia	6	288	0.71	0.0097	9606.ENSP00000239938,9606.ENSP00000307305,9606.ENSP00000356438,9606.ENSP00000360762,9606.ENSP00000368683,9606.ENSP00000478570	EGR1,DDIT4,PTGS2,ANKRD1,EDN1,VEGFA
GO:0048870	cell motility	11	914	0.47	0.0097	9606.ENSP00000230990,9606.ENSP00000296026,9606.ENSP00000306512,9606.ENSP00000307305,9606.ENSP00000326737,9606.ENSP00000356954,9606.ENSP00000398736,9606.ENSP00000427279,9606.ENSP00000440864,9606.ENSP00000465617,9606.ENSP00000478570	HBEGF,CXCL3,CXCL8,DDIT4,TNFRSF12A,CTGF,CYR61,CXCL2,NR4A1,IER2,VEGFA
GO:0070498	interleukin-1-mediated signaling pathway	3	51	1.16	0.0105	9606.ENSP00000239938,9606.ENSP00000256458,9606.ENSP00000263339	EGR1,IRAK2,IL1A
GO:0051090	regulation of DNA-binding transcription factor activity	7	403	0.63	0.0106	9606.ENSP00000256458,9606.ENSP00000270162,9606.ENSP00000306245,9606.ENSP00000360266,9606.ENSP00000368683,9606.ENSP00000448665,9606.ENSP00000478570	IRAK2,SIK1,FOS,JUN,EDN1,DDIT3,VEGFA
GO:0071356	cellular response to tumor necrosis factor	5	197	0.79	0.0106	9606.ENSP00000306512,9606.ENSP00000326737,9606.ENSP00000360762,9606.ENSP00000368683,9606.ENSP00000469647	CXCL8,TNFRSF12A,ANKRD1,EDN1,ZFP36
GO:0071383	cellular response to steroid hormone stimulus	5	197	0.79	0.0106	9606.ENSP00000307305,9606.ENSP00000366702,9606.ENSP00000368683,9606.ENSP00000440864,9606.ENSP00000469647	DDIT4,ERRFI1,EDN1,NR4A1,ZFP36
GO:0097190	apoptotic signaling pathway	6	295	0.7	0.0107	9606.ENSP00000200453,9606.ENSP00000263339,9606.ENSP00000307305,9606.ENSP00000326737,9606.ENSP00000360266,9606.ENSP00000448665	PPP1R15A,IL1A,DDIT4,TNFRSF12A,JUN,DDIT3
GO:1990440	positive regulation of transcription from RNA polymerase II promoter in response to endoplasmic reticulum stress	2	12	1.61	0.0108	9606.ENSP00000344352,9606.ENSP00000448665	ATF3,DDIT3
GO:0051336	regulation of hydrolase activity	13	1238	0.41	0.0114	9606.ENSP00000200453,9606.ENSP00000307235,9606.ENSP00000356438,9606.ENSP00000356529,9606.ENSP00000356954,9606.ENSP00000360266,9606.ENSP00000366702,9606.ENSP00000368727,9606.ENSP00000379201,9606.ENSP00000398736,9606.ENSP00000409555,9606.ENSP00000446479,9606.ENSP00000478570	PPP1R15A,EIF2AK3,PTGS2,RGS16,CTGF,JUN,ERRFI1,XDH,VCPKMT,CYR61,HERPUD1,FICD,VEGFA
GO:0051896	regulation of protein kinase B signaling	5	203	0.78	0.0118	9606.ENSP00000230990,9606.ENSP00000244869,9606.ENSP00000252809,9606.ENSP00000368727,9606.ENSP00000448665	HBEGF,EREG,GDF15,XDH,DDIT3
GO:0045840	positive regulation of mitotic nuclear division	3	54	1.13	0.012	9606.ENSP00000244869,9606.ENSP00000263339,9606.ENSP00000368683	EREG,IL1A,EDN1
GO:0045598	regulation of fat cell differentiation	4	120	0.91	0.0121	9606.ENSP00000344741,9606.ENSP00000356438,9606.ENSP00000448665,9606.ENSP00000469647	INSIG1,PTGS2,DDIT3,ZFP36
GO:0031650	regulation of heat generation	2	13	1.58	0.0122	9606.ENSP00000265138,9606.ENSP00000356438	ARRDC3,PTGS2
GO:1900102	negative regulation of endoplasmic reticulum unfolded protein response	2	13	1.58	0.0122	9606.ENSP00000200453,9606.ENSP00000249356	PPP1R15A,DNAJB9
GO:1903894	regulation of IRE1-mediated unfolded protein response	2	13	1.58	0.0122	9606.ENSP00000249356,9606.ENSP00000446479	DNAJB9,FICD
GO:0031669	cellular response to nutrient levels	5	206	0.77	0.0124	9606.ENSP00000167588,9606.ENSP00000307235,9606.ENSP00000344352,9606.ENSP00000356438,9606.ENSP00000360266	KRT20,EIF2AK3,ATF3,PTGS2,JUN
GO:0000122	negative regulation of transcription by RNA polymerase II	10	809	0.48	0.0127	9606.ENSP00000239938,9606.ENSP00000264444,9606.ENSP00000344352,9606.ENSP00000360266,9606.ENSP00000360762,9606.ENSP00000368683,9606.ENSP00000370936,9606.ENSP00000448665,9606.ENSP00000469647,9606.ENSP00000478570	EGR1,MXD1,ATF3,JUN,ANKRD1,EDN1,E2F6,DDIT3,ZFP36,VEGFA
GO:0001936	regulation of endothelial cell proliferation	4	122	0.9	0.0127	9606.ENSP00000360266,9606.ENSP00000368727,9606.ENSP00000440864,9606.ENSP00000478570	JUN,XDH,NR4A1,VEGFA
GO:0016477	cell migration	10	812	0.48	0.0129	9606.ENSP00000230990,9606.ENSP00000296026,9606.ENSP00000306512,9606.ENSP00000307305,9606.ENSP00000326737,9606.ENSP00000356954,9606.ENSP00000398736,9606.ENSP00000427279,9606.ENSP00000440864,9606.ENSP00000478570	HBEGF,CXCL3,CXCL8,DDIT4,TNFRSF12A,CTGF,CYR61,CXCL2,NR4A1,VEGFA
GO:0043280	positive regulation of cysteine-type endopeptidase activity involved in apoptotic process	4	123	0.9	0.0129	9606.ENSP00000307235,9606.ENSP00000356954,9606.ENSP00000368727,9606.ENSP00000398736	EIF2AK3,CTGF,XDH,CYR61
GO:0022603	regulation of anatomical structure morphogenesis	11	961	0.45	0.0134	9606.ENSP00000252809,9606.ENSP00000263339,9606.ENSP00000272233,9606.ENSP00000279488,9606.ENSP00000306512,9606.ENSP00000326737,9606.ENSP00000356438,9606.ENSP00000368683,9606.ENSP00000368727,9606.ENSP00000372361,9606.ENSP00000478570	GDF15,IL1A,RHOB,DUSP6,CXCL8,TNFRSF12A,PTGS2,EDN1,XDH,ZMYM5,VEGFA
GO:0071850	mitotic cell cycle arrest	2	14	1.54	0.0134	9606.ENSP00000239223,9606.ENSP00000360025	DUSP1,GADD45A
GO:0042108	positive regulation of cytokine biosynthetic process	3	58	1.1	0.0139	9606.ENSP00000239938,9606.ENSP00000244869,9606.ENSP00000263339	EGR1,EREG,IL1A
GO:0060395	SMAD protein signal transduction	3	58	1.1	0.0139	9606.ENSP00000252809,9606.ENSP00000306245,9606.ENSP00000360266	GDF15,FOS,JUN
GO:0050930	induction of positive chemotaxis	2	15	1.51	0.015	9606.ENSP00000306512,9606.ENSP00000478570	CXCL8,VEGFA
GO:0051592	response to calcium ion	4	129	0.88	0.015	9606.ENSP00000239223,9606.ENSP00000306245,9606.ENSP00000360266,9606.ENSP00000368683	DUSP1,FOS,JUN,EDN1
GO:0001101	response to acid chemical	6	323	0.66	0.0156	9606.ENSP00000239223,9606.ENSP00000239938,9606.ENSP00000356438,9606.ENSP00000356954,9606.ENSP00000368683,9606.ENSP00000478570	DUSP1,EGR1,PTGS2,CTGF,EDN1,VEGFA
GO:0044260	cellular macromolecule metabolic process	39	6413	0.17	0.0156	9606.ENSP00000200453,9606.ENSP00000230990,9606.ENSP00000239223,9606.ENSP00000239938,9606.ENSP00000242480,9606.ENSP00000244869,9606.ENSP00000249356,9606.ENSP00000256458,9606.ENSP00000264444,9606.ENSP00000270162,9606.ENSP00000273153,9606.ENSP00000273668,9606.ENSP00000279488,9606.ENSP00000288943,9606.ENSP00000306245,9606.ENSP00000306512,9606.ENSP00000307235,9606.ENSP00000312021,9606.ENSP00000326813,…	PPP1R15A,HBEGF,DUSP1,EGR1,EGR2,EREG,DNAJB9,IRAK2,MXD1,SIK1,CSRNP1,EAF2,DUSP6,DUSP2,FOS,CXCL8,EIF2AK3,FUT1,YOD1,ATF3,SERTAD1,CTGF,GADD45A,JUN,ZBTB43,E2F6,ZMYM5,VCPKMT,CYR61,NABP1,HERPUD1,KLF6,TIPARP,NR4A1,FICD,DDIT3,IER2,ZFP36,DNAJC3
GO:0010042	response to manganese ion	2	16	1.49	0.0166	9606.ENSP00000307235,9606.ENSP00000356438	EIF2AK3,PTGS2
GO:0040011	locomotion	12	1144	0.41	0.0166	9606.ENSP00000230990,9606.ENSP00000242480,9606.ENSP00000296026,9606.ENSP00000306512,9606.ENSP00000307305,9606.ENSP00000326737,9606.ENSP00000356954,9606.ENSP00000398736,9606.ENSP00000427279,9606.ENSP00000440864,9606.ENSP00000465617,9606.ENSP00000478570	HBEGF,EGR2,CXCL3,CXCL8,DDIT4,TNFRSF12A,CTGF,CYR61,CXCL2,NR4A1,IER2,VEGFA
GO:0071243	cellular response to arsenic-containing substance	2	16	1.49	0.0166	9606.ENSP00000314619,9606.ENSP00000344352	ZFAND2A,ATF3
GO:0044237	cellular metabolic process	49	8797	0.13	0.0173	9606.ENSP00000200453,9606.ENSP00000230990,9606.ENSP00000239223,9606.ENSP00000239938,9606.ENSP00000242480,9606.ENSP00000244869,9606.ENSP00000249356,9606.ENSP00000256458,9606.ENSP00000263960,9606.ENSP00000264444,9606.ENSP00000270162,9606.ENSP00000273153,9606.ENSP00000273668,9606.ENSP00000278590,9606.ENSP00000279488,9606.ENSP00000288943,9606.ENSP00000306245,9606.ENSP00000306512,9606.ENSP00000307235,…	PPP1R15A,HBEGF,DUSP1,EGR1,EGR2,EREG,DNAJB9,IRAK2,COQ10B,MXD1,SIK1,CSRNP1,EAF2,ZC3H12C,DUSP6,DUSP2,FOS,CXCL8,EIF2AK3,DDIT4,FUT1,YOD1,ATF3,INSIG1,SERTAD1,PTGS2,CTGF,GADD45A,JUN,SLC25A25,ZBTB43,GPCPD1,EDN1,XDH,E2F6,ZMYM5,VCPKMT,CYR61,NABP1,HERPUD1,KLF6,TIPARP,ADH1C,NR4A1,FICD,DDIT3,IER2,ZFP36,DNAJC3
GO:0071479	cellular response to ionizing radiation	3	64	1.06	0.0177	9606.ENSP00000239938,9606.ENSP00000272233,9606.ENSP00000360025	EGR1,RHOB,GADD45A
GO:0009267	cellular response to starvation	4	137	0.85	0.018	9606.ENSP00000167588,9606.ENSP00000307235,9606.ENSP00000344352,9606.ENSP00000360266	KRT20,EIF2AK3,ATF3,JUN
GO:0002042	cell migration involved in sprouting angiogenesis	2	17	1.46	0.0183	9606.ENSP00000440864,9606.ENSP00000478570	NR4A1,VEGFA
GO:0071277	cellular response to calcium ion	3	65	1.05	0.0183	9606.ENSP00000306245,9606.ENSP00000360266,9606.ENSP00000368683	FOS,JUN,EDN1
GO:0046683	response to organophosphorus	4	138	0.85	0.0184	9606.ENSP00000239223,9606.ENSP00000306245,9606.ENSP00000356438,9606.ENSP00000360266	DUSP1,FOS,PTGS2,JUN
GO:0001501	skeletal system development	7	457	0.57	0.019	9606.ENSP00000273153,9606.ENSP00000307235,9606.ENSP00000344741,9606.ENSP00000356954,9606.ENSP00000368683,9606.ENSP00000398736,9606.ENSP00000420612	CSRNP1,EIF2AK3,INSIG1,CTGF,EDN1,CYR61,TIPARP
GO:0071621	granulocyte chemotaxis	3	66	1.05	0.019	9606.ENSP00000296026,9606.ENSP00000306512,9606.ENSP00000478570	CXCL3,CXCL8,VEGFA
GO:0001516	prostaglandin biosynthetic process	2	18	1.43	0.0198	9606.ENSP00000356438,9606.ENSP00000368683	PTGS2,EDN1
GO:0008277	regulation of G protein-coupled receptor signaling pathway	4	142	0.84	0.0198	9606.ENSP00000265138,9606.ENSP00000306512,9606.ENSP00000356529,9606.ENSP00000368683	ARRDC3,CXCL8,RGS16,EDN1
GO:0010629	negative regulation of gene expression	15	1670	0.34	0.0198	9606.ENSP00000239938,9606.ENSP00000244869,9606.ENSP00000264444,9606.ENSP00000307235,9606.ENSP00000344352,9606.ENSP00000356954,9606.ENSP00000360266,9606.ENSP00000360762,9606.ENSP00000368683,9606.ENSP00000368727,9606.ENSP00000370936,9606.ENSP00000420612,9606.ENSP00000448665,9606.ENSP00000469647,9606.ENSP00000478570	EGR1,EREG,MXD1,EIF2AK3,ATF3,CTGF,JUN,ANKRD1,EDN1,XDH,E2F6,TIPARP,DDIT3,ZFP36,VEGFA
GO:0030224	monocyte differentiation	2	18	1.43	0.0198	9606.ENSP00000360266,9606.ENSP00000478570	JUN,VEGFA
GO:0045076	regulation of interleukin-2 biosynthetic process	2	18	1.43	0.0198	9606.ENSP00000263339,9606.ENSP00000469647	IL1A,ZFP36
GO:0006970	response to osmotic stress	3	68	1.03	0.02	9606.ENSP00000354543,9606.ENSP00000356438,9606.ENSP00000366702	TSC22D2,PTGS2,ERRFI1
GO:0045862	positive regulation of proteolysis	6	347	0.63	0.0208	9606.ENSP00000307235,9606.ENSP00000314619,9606.ENSP00000356954,9606.ENSP00000368727,9606.ENSP00000398736,9606.ENSP00000409555	EIF2AK3,ZFAND2A,CTGF,XDH,CYR61,HERPUD1
GO:0009636	response to toxic substance	7	468	0.56	0.021	9606.ENSP00000239223,9606.ENSP00000239938,9606.ENSP00000272233,9606.ENSP00000306245,9606.ENSP00000356438,9606.ENSP00000360266,9606.ENSP00000368683	DUSP1,EGR1,RHOB,FOS,PTGS2,JUN,EDN1
GO:0002684	positive regulation of immune system process	10	882	0.44	0.0213	9606.ENSP00000244869,9606.ENSP00000256458,9606.ENSP00000263339,9606.ENSP00000296026,9606.ENSP00000306245,9606.ENSP00000306512,9606.ENSP00000360266,9606.ENSP00000368683,9606.ENSP00000427279,9606.ENSP00000478570	EREG,IRAK2,IL1A,CXCL3,FOS,CXCL8,JUN,EDN1,CXCL2,VEGFA
GO:0007589	body fluid secretion	3	70	1.02	0.0214	9606.ENSP00000368683,9606.ENSP00000368727,9606.ENSP00000478570	EDN1,XDH,VEGFA
GO:0071222	cellular response to lipopolysaccharide	4	146	0.83	0.0214	9606.ENSP00000256458,9606.ENSP00000306512,9606.ENSP00000360762,9606.ENSP00000469647	IRAK2,CXCL8,ANKRD1,ZFP36
GO:1903524	positive regulation of blood circulation	3	70	1.02	0.0214	9606.ENSP00000356438,9606.ENSP00000356954,9606.ENSP00000368683	PTGS2,CTGF,EDN1
GO:0051216	cartilage development	4	147	0.82	0.0217	9606.ENSP00000307235,9606.ENSP00000356954,9606.ENSP00000368683,9606.ENSP00000398736	EIF2AK3,CTGF,EDN1,CYR61
GO:0030162	regulation of proteolysis	9	742	0.47	0.0219	9606.ENSP00000307235,9606.ENSP00000314619,9606.ENSP00000326813,9606.ENSP00000356438,9606.ENSP00000356954,9606.ENSP00000368727,9606.ENSP00000398736,9606.ENSP00000409555,9606.ENSP00000478570	EIF2AK3,ZFAND2A,YOD1,PTGS2,CTGF,XDH,CYR61,HERPUD1,VEGFA
GO:0051345	positive regulation of hydrolase activity	9	742	0.47	0.0219	9606.ENSP00000200453,9606.ENSP00000307235,9606.ENSP00000356529,9606.ENSP00000356954,9606.ENSP00000360266,9606.ENSP00000366702,9606.ENSP00000368727,9606.ENSP00000398736,9606.ENSP00000478570	PPP1R15A,EIF2AK3,RGS16,CTGF,JUN,ERRFI1,XDH,CYR61,VEGFA
GO:0051147	regulation of muscle cell differentiation	4	148	0.82	0.022	9606.ENSP00000244869,9606.ENSP00000252809,9606.ENSP00000270162,9606.ENSP00000368683	EREG,GDF15,SIK1,EDN1
GO:0010212	response to ionizing radiation	4	149	0.82	0.0225	9606.ENSP00000239938,9606.ENSP00000272233,9606.ENSP00000360025,9606.ENSP00000403683	EGR1,RHOB,GADD45A,NABP1
GO:0042474	middle ear morphogenesis	2	20	1.39	0.0227	9606.ENSP00000344741,9606.ENSP00000368683	INSIG1,EDN1
GO:0014074	response to purine-containing compound	4	151	0.81	0.0233	9606.ENSP00000239223,9606.ENSP00000306245,9606.ENSP00000356438,9606.ENSP00000360266	DUSP1,FOS,PTGS2,JUN
GO:0001817	regulation of cytokine production	8	615	0.5	0.024	9606.ENSP00000239938,9606.ENSP00000244869,9606.ENSP00000263339,9606.ENSP00000307235,9606.ENSP00000356438,9606.ENSP00000366702,9606.ENSP00000448665,9606.ENSP00000469647	EGR1,EREG,IL1A,EIF2AK3,PTGS2,ERRFI1,DDIT3,ZFP36
GO:0048511	rhythmic process	5	250	0.69	0.0242	9606.ENSP00000239938,9606.ENSP00000242480,9606.ENSP00000244869,9606.ENSP00000270162,9606.ENSP00000360266	EGR1,EGR2,EREG,SIK1,JUN
GO:0071478	cellular response to radiation	4	153	0.81	0.0242	9606.ENSP00000239938,9606.ENSP00000272233,9606.ENSP00000356438,9606.ENSP00000360025	EGR1,RHOB,PTGS2,GADD45A
GO:0090050	positive regulation of cell migration involved in sprouting angiogenesis	2	21	1.37	0.0244	9606.ENSP00000356438,9606.ENSP00000478570	PTGS2,VEGFA
GO:0070098	chemokine-mediated signaling pathway	3	75	0.99	0.0247	9606.ENSP00000296026,9606.ENSP00000306512,9606.ENSP00000427279	CXCL3,CXCL8,CXCL2
GO:0007568	aging	5	255	0.68	0.0258	9606.ENSP00000306245,9606.ENSP00000356438,9606.ENSP00000356954,9606.ENSP00000360266,9606.ENSP00000368683	FOS,PTGS2,CTGF,JUN,EDN1
GO:0030728	ovulation	2	22	1.35	0.0262	9606.ENSP00000244869,9606.ENSP00000356438	EREG,PTGS2
GO:0006952	defense response	12	1234	0.38	0.0269	9606.ENSP00000239938,9606.ENSP00000256458,9606.ENSP00000263339,9606.ENSP00000296026,9606.ENSP00000306245,9606.ENSP00000306512,9606.ENSP00000307305,9606.ENSP00000356438,9606.ENSP00000360266,9606.ENSP00000368683,9606.ENSP00000427279,9606.ENSP00000473631	EGR1,IRAK2,IL1A,CXCL3,FOS,CXCL8,DDIT4,PTGS2,JUN,EDN1,CXCL2,DNAJC3
GO:0071260	cellular response to mechanical stimulus	3	78	0.97	0.0269	9606.ENSP00000356438,9606.ENSP00000360025,9606.ENSP00000360762	PTGS2,GADD45A,ANKRD1
GO:2001242	regulation of intrinsic apoptotic signaling pathway	4	159	0.79	0.0269	9606.ENSP00000307235,9606.ENSP00000356438,9606.ENSP00000409555,9606.ENSP00000448665	EIF2AK3,PTGS2,HERPUD1,DDIT3
GO:0006979	response to oxidative stress	6	373	0.59	0.0272	9606.ENSP00000239223,9606.ENSP00000272233,9606.ENSP00000306245,9606.ENSP00000356438,9606.ENSP00000360266,9606.ENSP00000368683	DUSP1,RHOB,FOS,PTGS2,JUN,EDN1
GO:0019216	regulation of lipid metabolic process	6	373	0.59	0.0272	9606.ENSP00000239938,9606.ENSP00000270162,9606.ENSP00000344741,9606.ENSP00000356438,9606.ENSP00000360762,9606.ENSP00000398736	EGR1,SIK1,INSIG1,PTGS2,ANKRD1,CYR61
GO:0007088	regulation of mitotic nuclear division	4	160	0.79	0.0273	9606.ENSP00000239223,9606.ENSP00000244869,9606.ENSP00000263339,9606.ENSP00000368683	DUSP1,EREG,IL1A,EDN1
GO:0045787	positive regulation of cell cycle	6	376	0.59	0.028	9606.ENSP00000244869,9606.ENSP00000263339,9606.ENSP00000349547,9606.ENSP00000356954,9606.ENSP00000360025,9606.ENSP00000368683	EREG,IL1A,RASSF1,CTGF,GADD45A,EDN1
GO:0032897	negative regulation of viral transcription	2	24	1.31	0.0298	9606.ENSP00000360266,9606.ENSP00000469647	JUN,ZFP36
GO:0044319	wound healing, spreading of cells	2	24	1.31	0.0298	9606.ENSP00000230990,9606.ENSP00000398736	HBEGF,CYR61
GO:0051128	regulation of cellular component organization	18	2306	0.28	0.0299	9606.ENSP00000200453,9606.ENSP00000230990,9606.ENSP00000239223,9606.ENSP00000244869,9606.ENSP00000252809,9606.ENSP00000263339,9606.ENSP00000273668,9606.ENSP00000326737,9606.ENSP00000344741,9606.ENSP00000349547,9606.ENSP00000356954,9606.ENSP00000360266,9606.ENSP00000360762,9606.ENSP00000368683,9606.ENSP00000372361,9606.ENSP00000398736,9606.ENSP00000427108,9606.ENSP00000478570	PPP1R15A,HBEGF,DUSP1,EREG,GDF15,IL1A,EAF2,TNFRSF12A,INSIG1,RASSF1,CTGF,JUN,ANKRD1,EDN1,ZMYM5,CYR61,CDKN2AIP,VEGFA
GO:0070542	response to fatty acid	3	82	0.95	0.0299	9606.ENSP00000356438,9606.ENSP00000356954,9606.ENSP00000368683	PTGS2,CTGF,EDN1
GO:0045934	negative regulation of nucleobase-containing compound metabolic process	13	1424	0.35	0.0303	9606.ENSP00000239223,9606.ENSP00000239938,9606.ENSP00000244869,9606.ENSP00000264444,9606.ENSP00000307305,9606.ENSP00000344352,9606.ENSP00000360266,9606.ENSP00000360762,9606.ENSP00000368683,9606.ENSP00000370936,9606.ENSP00000448665,9606.ENSP00000469647,9606.ENSP00000478570	DUSP1,EGR1,EREG,MXD1,DDIT4,ATF3,JUN,ANKRD1,EDN1,E2F6,DDIT3,ZFP36,VEGFA
GO:0007049	cell cycle	12	1263	0.37	0.0311	9606.ENSP00000200453,9606.ENSP00000239223,9606.ENSP00000244869,9606.ENSP00000270162,9606.ENSP00000272233,9606.ENSP00000306512,9606.ENSP00000349547,9606.ENSP00000360025,9606.ENSP00000370936,9606.ENSP00000403683,9606.ENSP00000448665,9606.ENSP00000484532	PPP1R15A,DUSP1,EREG,SIK1,RHOB,CXCL8,RASSF1,GADD45A,E2F6,NABP1,DDIT3,MIS12
GO:0002021	response to dietary excess	2	25	1.29	0.0316	9606.ENSP00000252809,9606.ENSP00000362159	GDF15,SLC25A25
GO:0008585	female gonad development	3	84	0.94	0.0316	9606.ENSP00000244869,9606.ENSP00000420612,9606.ENSP00000478570	EREG,TIPARP,VEGFA
GO:1902895	positive regulation of pri-miRNA transcription by RNA polymerase II	2	25	1.29	0.0316	9606.ENSP00000306245,9606.ENSP00000360266	FOS,JUN
GO:0001819	positive regulation of cytokine production	6	390	0.58	0.0321	9606.ENSP00000239938,9606.ENSP00000244869,9606.ENSP00000263339,9606.ENSP00000307235,9606.ENSP00000356438,9606.ENSP00000448665	EGR1,EREG,IL1A,EIF2AK3,PTGS2,DDIT3
GO:0036503	ERAD pathway	3	85	0.94	0.0321	9606.ENSP00000249356,9606.ENSP00000326813,9606.ENSP00000409555	DNAJB9,YOD1,HERPUD1
GO:0090068	positive regulation of cell cycle process	5	273	0.65	0.0321	9606.ENSP00000244869,9606.ENSP00000263339,9606.ENSP00000356954,9606.ENSP00000360025,9606.ENSP00000368683	EREG,IL1A,CTGF,GADD45A,EDN1
GO:0060548	negative regulation of cell death	10	953	0.41	0.0322	9606.ENSP00000239223,9606.ENSP00000263339,9606.ENSP00000356438,9606.ENSP00000356954,9606.ENSP00000360266,9606.ENSP00000368683,9606.ENSP00000398736,9606.ENSP00000409555,9606.ENSP00000473631,9606.ENSP00000478570	DUSP1,IL1A,PTGS2,CTGF,JUN,EDN1,CYR61,HERPUD1,DNAJC3,VEGFA
GO:0060021	roof of mouth development	3	87	0.93	0.0338	9606.ENSP00000273153,9606.ENSP00000344741,9606.ENSP00000420612	CSRNP1,INSIG1,TIPARP
GO:0007179	transforming growth factor beta receptor signaling pathway	3	88	0.92	0.0348	9606.ENSP00000252809,9606.ENSP00000306245,9606.ENSP00000360266	GDF15,FOS,JUN
GO:0009299	mRNA transcription	2	27	1.26	0.0352	9606.ENSP00000244869,9606.ENSP00000448665	EREG,DDIT3
GO:0008285	negative regulation of cell population proliferation	8	669	0.47	0.0353	9606.ENSP00000239223,9606.ENSP00000244869,9606.ENSP00000263339,9606.ENSP00000273668,9606.ENSP00000306512,9606.ENSP00000356438,9606.ENSP00000360266,9606.ENSP00000368727	DUSP1,EREG,IL1A,EAF2,CXCL8,PTGS2,JUN,XDH
GO:0001938	positive regulation of endothelial cell proliferation	3	89	0.92	0.0355	9606.ENSP00000360266,9606.ENSP00000440864,9606.ENSP00000478570	JUN,NR4A1,VEGFA
GO:0031640	killing of cells of other organism	3	89	0.92	0.0355	9606.ENSP00000296026,9606.ENSP00000306512,9606.ENSP00000427279	CXCL3,CXCL8,CXCL2
GO:0044364	disruption of cells of other organism	3	89	0.92	0.0355	9606.ENSP00000296026,9606.ENSP00000306512,9606.ENSP00000427279	CXCL3,CXCL8,CXCL2
GO:0009791	post-embryonic development	3	90	0.91	0.0363	9606.ENSP00000273153,9606.ENSP00000420612,9606.ENSP00000478570	CSRNP1,TIPARP,VEGFA
GO:0008283	cell population proliferation	8	676	0.46	0.0369	9606.ENSP00000239938,9606.ENSP00000244869,9606.ENSP00000263339,9606.ENSP00000264444,9606.ENSP00000307305,9606.ENSP00000344741,9606.ENSP00000356954,9606.ENSP00000398736	EGR1,EREG,IL1A,MXD1,DDIT4,INSIG1,CTGF,CYR61
GO:0043154	negative regulation of cysteine-type endopeptidase activity involved in apoptotic process	3	91	0.91	0.0369	9606.ENSP00000356438,9606.ENSP00000409555,9606.ENSP00000478570	PTGS2,HERPUD1,VEGFA
GO:0071549	cellular response to dexamethasone stimulus	2	28	1.24	0.0369	9606.ENSP00000307305,9606.ENSP00000366702	DDIT4,ERRFI1
GO:1904292	regulation of ERAD pathway	2	28	1.24	0.0369	9606.ENSP00000326813,9606.ENSP00000409555	YOD1,HERPUD1
GO:0006351	transcription, DNA-templated	19	2569	0.26	0.0383	9606.ENSP00000239938,9606.ENSP00000242480,9606.ENSP00000244869,9606.ENSP00000264444,9606.ENSP00000273153,9606.ENSP00000273668,9606.ENSP00000306245,9606.ENSP00000344352,9606.ENSP00000350633,9606.ENSP00000356954,9606.ENSP00000360266,9606.ENSP00000362563,9606.ENSP00000370936,9606.ENSP00000372361,9606.ENSP00000403683,9606.ENSP00000419923,9606.ENSP00000440864,9606.ENSP00000448665,9606.ENSP00000465617	EGR1,EGR2,EREG,MXD1,CSRNP1,EAF2,FOS,ATF3,SERTAD1,CTGF,JUN,ZBTB43,E2F6,ZMYM5,NABP1,KLF6,NR4A1,DDIT3,IER2
GO:0007176	regulation of epidermal growth factor-activated receptor activity	2	29	1.23	0.0385	9606.ENSP00000244869,9606.ENSP00000366702	EREG,ERRFI1
GO:0010564	regulation of cell cycle process	8	684	0.46	0.0385	9606.ENSP00000239223,9606.ENSP00000244869,9606.ENSP00000263339,9606.ENSP00000349547,9606.ENSP00000356954,9606.ENSP00000360025,9606.ENSP00000368683,9606.ENSP00000370936	DUSP1,EREG,IL1A,RASSF1,CTGF,GADD45A,EDN1,E2F6
GO:0035821	modification of morphology or physiology of other organism	4	182	0.73	0.0385	9606.ENSP00000296026,9606.ENSP00000306512,9606.ENSP00000360266,9606.ENSP00000427279	CXCL3,CXCL8,JUN,CXCL2
GO:0042036	negative regulation of cytokine biosynthetic process	2	29	1.23	0.0385	9606.ENSP00000366702,9606.ENSP00000469647	ERRFI1,ZFP36
GO:0062014	negative regulation of small molecule metabolic process	3	93	0.9	0.0385	9606.ENSP00000270162,9606.ENSP00000307305,9606.ENSP00000344741	SIK1,DDIT4,INSIG1
GO:0071470	cellular response to osmotic stress	2	29	1.23	0.0385	9606.ENSP00000356438,9606.ENSP00000366702	PTGS2,ERRFI1
GO:0009611	response to wounding	7	547	0.5	0.0394	9606.ENSP00000230990,9606.ENSP00000244869,9606.ENSP00000263339,9606.ENSP00000356954,9606.ENSP00000360266,9606.ENSP00000398736,9606.ENSP00000469647	HBEGF,EREG,IL1A,CTGF,JUN,CYR61,ZFP36
GO:0001569	branching involved in blood vessel morphogenesis	2	30	1.21	0.0401	9606.ENSP00000368683,9606.ENSP00000478570	EDN1,VEGFA
GO:0071542	dopaminergic neuron differentiation	2	30	1.21	0.0401	9606.ENSP00000432799,9606.ENSP00000478570	MANF,VEGFA
GO:0051153	regulation of striated muscle cell differentiation	3	96	0.88	0.0409	9606.ENSP00000252809,9606.ENSP00000270162,9606.ENSP00000368683	GDF15,SIK1,EDN1
GO:0007178	transmembrane receptor protein serine/threonine kinase signaling pathway	4	189	0.71	0.0422	9606.ENSP00000239938,9606.ENSP00000252809,9606.ENSP00000306245,9606.ENSP00000360266	EGR1,GDF15,FOS,JUN
GO:0038128	ERBB2 signaling pathway	2	31	1.2	0.0422	9606.ENSP00000230990,9606.ENSP00000244869	HBEGF,EREG
GO:0060325	face morphogenesis	2	31	1.2	0.0422	9606.ENSP00000273153,9606.ENSP00000420612	CSRNP1,TIPARP
GO:0070059	intrinsic apoptotic signaling pathway in response to endoplasmic reticulum stress	2	31	1.2	0.0422	9606.ENSP00000200453,9606.ENSP00000448665	PPP1R15A,DDIT3
GO:0071276	cellular response to cadmium ion	2	31	1.2	0.0422	9606.ENSP00000306245,9606.ENSP00000360266	FOS,JUN
GO:0045892	negative regulation of transcription, DNA-templated	11	1169	0.36	0.0426	9606.ENSP00000239938,9606.ENSP00000244869,9606.ENSP00000264444,9606.ENSP00000344352,9606.ENSP00000360266,9606.ENSP00000360762,9606.ENSP00000368683,9606.ENSP00000370936,9606.ENSP00000448665,9606.ENSP00000469647,9606.ENSP00000478570	EGR1,EREG,MXD1,ATF3,JUN,ANKRD1,EDN1,E2F6,DDIT3,ZFP36,VEGFA
GO:0051591	response to cAMP	3	98	0.87	0.0426	9606.ENSP00000239223,9606.ENSP00000306245,9606.ENSP00000360266	DUSP1,FOS,JUN
GO:0048638	regulation of developmental growth	5	302	0.61	0.0436	9606.ENSP00000252809,9606.ENSP00000279488,9606.ENSP00000326737,9606.ENSP00000368683,9606.ENSP00000478570	GDF15,DUSP6,TNFRSF12A,EDN1,VEGFA
GO:0060612	adipose tissue development	2	32	1.18	0.044	9606.ENSP00000265138,9606.ENSP00000362159	ARRDC3,SLC25A25
GO:0061418	regulation of transcription from RNA polymerase II promoter in response to hypoxia	2	32	1.18	0.044	9606.ENSP00000239938,9606.ENSP00000478570	EGR1,VEGFA
GO:1904707	positive regulation of vascular smooth muscle cell proliferation	2	32	1.18	0.044	9606.ENSP00000360266,9606.ENSP00000368683	JUN,EDN1
GO:0035335	peptidyl-tyrosine dephosphorylation	3	100	0.87	0.0445	9606.ENSP00000239223,9606.ENSP00000279488,9606.ENSP00000288943	DUSP1,DUSP6,DUSP2
GO:0043066	negative regulation of apoptotic process	9	859	0.41	0.0445	9606.ENSP00000239223,9606.ENSP00000263339,9606.ENSP00000356438,9606.ENSP00000360266,9606.ENSP00000368683,9606.ENSP00000398736,9606.ENSP00000409555,9606.ENSP00000473631,9606.ENSP00000478570	DUSP1,IL1A,PTGS2,JUN,EDN1,CYR61,HERPUD1,DNAJC3,VEGFA
GO:0045444	fat cell differentiation	3	100	0.87	0.0445	9606.ENSP00000242480,9606.ENSP00000356438,9606.ENSP00000440864	EGR2,PTGS2,NR4A1
GO:0046677	response to antibiotic	5	305	0.6	0.0447	9606.ENSP00000239223,9606.ENSP00000239938,9606.ENSP00000272233,9606.ENSP00000360266,9606.ENSP00000368683	DUSP1,EGR1,RHOB,JUN,EDN1
GO:0006470	protein dephosphorylation	4	194	0.7	0.0448	9606.ENSP00000200453,9606.ENSP00000239223,9606.ENSP00000279488,9606.ENSP00000288943	PPP1R15A,DUSP1,DUSP6,DUSP2
GO:0001659	temperature homeostasis	2	33	1.17	0.0458	9606.ENSP00000263339,9606.ENSP00000265138	IL1A,ARRDC3
GO:0045987	positive regulation of smooth muscle contraction	2	33	1.17	0.0458	9606.ENSP00000356438,9606.ENSP00000368683	PTGS2,EDN1
GO:0006928	movement of cell or subcellular component	12	1355	0.34	0.0462	9606.ENSP00000230990,9606.ENSP00000242480,9606.ENSP00000296026,9606.ENSP00000306512,9606.ENSP00000307305,9606.ENSP00000326737,9606.ENSP00000356954,9606.ENSP00000398736,9606.ENSP00000427279,9606.ENSP00000440864,9606.ENSP00000465617,9606.ENSP00000478570	HBEGF,EGR2,CXCL3,CXCL8,DDIT4,TNFRSF12A,CTGF,CYR61,CXCL2,NR4A1,IER2,VEGFA
GO:0034654	nucleobase-containing compound biosynthetic process	21	3031	0.23	0.0471	9606.ENSP00000239938,9606.ENSP00000242480,9606.ENSP00000244869,9606.ENSP00000264444,9606.ENSP00000273153,9606.ENSP00000273668,9606.ENSP00000306245,9606.ENSP00000344352,9606.ENSP00000350633,9606.ENSP00000356438,9606.ENSP00000356954,9606.ENSP00000360266,9606.ENSP00000362563,9606.ENSP00000368727,9606.ENSP00000370936,9606.ENSP00000372361,9606.ENSP00000403683,9606.ENSP00000419923,9606.ENSP00000440864,…	EGR1,EGR2,EREG,MXD1,CSRNP1,EAF2,FOS,ATF3,SERTAD1,PTGS2,CTGF,JUN,ZBTB43,XDH,E2F6,ZMYM5,NABP1,KLF6,NR4A1,DDIT3,IER2
GO:1901362	organic cyclic compound biosynthetic process	22	3230	0.22	0.0471	9606.ENSP00000239938,9606.ENSP00000242480,9606.ENSP00000244869,9606.ENSP00000264444,9606.ENSP00000273153,9606.ENSP00000273668,9606.ENSP00000306245,9606.ENSP00000344352,9606.ENSP00000344741,9606.ENSP00000350633,9606.ENSP00000356438,9606.ENSP00000356954,9606.ENSP00000360266,9606.ENSP00000362563,9606.ENSP00000368727,9606.ENSP00000370936,9606.ENSP00000372361,9606.ENSP00000403683,9606.ENSP00000419923,…	EGR1,EGR2,EREG,MXD1,CSRNP1,EAF2,FOS,ATF3,INSIG1,SERTAD1,PTGS2,CTGF,JUN,ZBTB43,XDH,E2F6,ZMYM5,NABP1,KLF6,NR4A1,DDIT3,IER2
GO:0051346	negative regulation of hydrolase activity	6	438	0.53	0.048	9606.ENSP00000200453,9606.ENSP00000356438,9606.ENSP00000379201,9606.ENSP00000409555,9606.ENSP00000446479,9606.ENSP00000478570	PPP1R15A,PTGS2,VCPKMT,HERPUD1,FICD,VEGFA
GO:0002521	leukocyte differentiation	5	313	0.59	0.0484	9606.ENSP00000239938,9606.ENSP00000249356,9606.ENSP00000360266,9606.ENSP00000419923,9606.ENSP00000478570	EGR1,DNAJB9,JUN,KLF6,VEGFA
GO:0032965	regulation of collagen biosynthetic process	2	35	1.15	0.0499	9606.ENSP00000356954,9606.ENSP00000366702	CTGF,ERRFI1
GO:0045740	positive regulation of DNA replication	2	35	1.15	0.0499	9606.ENSP00000244869,9606.ENSP00000360266	EREG,JUN

## Sheet: Cntrl_vs_Virus_24h_KEGG
Supplementary table S4: Results from the Gene Ontology (GO) analysis in the category for biological process complete (GObp) and Pathway Enrichment (KEGG pathways) in BCoV infected cells at 24 hpi.
#term ID	term description	observed gene count	background gene count	strength	false discovery rate	matching proteins in your network (IDs)	matching proteins in your network (labels)
hsa04010	MAPK signaling pathway	11	293	0.96	5.24e-06	9606.ENSP00000239223,9606.ENSP00000244869,9606.ENSP00000263339,9606.ENSP00000279488,9606.ENSP00000288943,9606.ENSP00000306245,9606.ENSP00000360025,9606.ENSP00000360266,9606.ENSP00000440864,9606.ENSP00000448665,9606.ENSP00000478570	DUSP1,EREG,IL1A,DUSP6,DUSP2,FOS,GADD45A,JUN,NR4A1,DDIT3,VEGFA
hsa05167	Kaposi's sarcoma-associated herpesvirus infection	8	183	1.03	6.98e-05	9606.ENSP00000296026,9606.ENSP00000306245,9606.ENSP00000306512,9606.ENSP00000356438,9606.ENSP00000360266,9606.ENSP00000427279,9606.ENSP00000469647,9606.ENSP00000478570	CXCL3,FOS,CXCL8,PTGS2,JUN,CXCL2,ZFP36,VEGFA
hsa05132	Salmonella infection	6	84	1.24	7.57e-05	9606.ENSP00000263339,9606.ENSP00000296026,9606.ENSP00000306245,9606.ENSP00000306512,9606.ENSP00000360266,9606.ENSP00000427279	IL1A,CXCL3,FOS,CXCL8,JUN,CXCL2
hsa04657	IL-17 signaling pathway	6	92	1.2	9.35e-05	9606.ENSP00000296026,9606.ENSP00000306245,9606.ENSP00000306512,9606.ENSP00000356438,9606.ENSP00000360266,9606.ENSP00000427279	CXCL3,FOS,CXCL8,PTGS2,JUN,CXCL2
hsa04933	AGE-RAGE signaling pathway in diabetic complications	6	98	1.18	0.00011	9606.ENSP00000239938,9606.ENSP00000263339,9606.ENSP00000306512,9606.ENSP00000360266,9606.ENSP00000368683,9606.ENSP00000478570	EGR1,IL1A,CXCL8,JUN,EDN1,VEGFA
hsa04141	Protein processing in endoplasmic reticulum	7	161	1.03	0.00012	9606.ENSP00000200453,9606.ENSP00000280551,9606.ENSP00000307235,9606.ENSP00000326813,9606.ENSP00000409555,9606.ENSP00000448665,9606.ENSP00000473631	PPP1R15A,SEC24D,EIF2AK3,YOD1,HERPUD1,DDIT3,DNAJC3
hsa04668	TNF signaling pathway	6	108	1.13	0.00013	9606.ENSP00000296026,9606.ENSP00000306245,9606.ENSP00000356438,9606.ENSP00000360266,9606.ENSP00000368683,9606.ENSP00000427279	CXCL3,FOS,PTGS2,JUN,EDN1,CXCL2
hsa05418	Fluid shear stress and atherosclerosis	6	133	1.04	0.00035	9606.ENSP00000239223,9606.ENSP00000263339,9606.ENSP00000306245,9606.ENSP00000360266,9606.ENSP00000368683,9606.ENSP00000478570	DUSP1,IL1A,FOS,JUN,EDN1,VEGFA
hsa05219	Bladder cancer	4	41	1.38	0.00044	9606.ENSP00000230990,9606.ENSP00000306512,9606.ENSP00000349547,9606.ENSP00000478570	HBEGF,CXCL8,RASSF1,VEGFA
hsa05323	Rheumatoid arthritis	5	84	1.16	0.00044	9606.ENSP00000263339,9606.ENSP00000306245,9606.ENSP00000306512,9606.ENSP00000360266,9606.ENSP00000478570	IL1A,FOS,CXCL8,JUN,VEGFA
hsa05140	Leishmaniasis	4	70	1.15	0.0027	9606.ENSP00000263339,9606.ENSP00000306245,9606.ENSP00000356438,9606.ENSP00000360266	IL1A,FOS,PTGS2,JUN
hsa04210	Apoptosis	5	135	0.96	0.0028	9606.ENSP00000306245,9606.ENSP00000307235,9606.ENSP00000360025,9606.ENSP00000360266,9606.ENSP00000448665	FOS,EIF2AK3,GADD45A,JUN,DDIT3
hsa05133	Pertussis	4	74	1.12	0.0028	9606.ENSP00000263339,9606.ENSP00000306245,9606.ENSP00000306512,9606.ENSP00000360266	IL1A,FOS,CXCL8,JUN
hsa04932	Non-alcoholic fatty liver disease (NAFLD)	5	149	0.91	0.0038	9606.ENSP00000263339,9606.ENSP00000306512,9606.ENSP00000307235,9606.ENSP00000360266,9606.ENSP00000448665	IL1A,CXCL8,EIF2AK3,JUN,DDIT3
hsa05210	Colorectal cancer	4	85	1.06	0.0041	9606.ENSP00000244869,9606.ENSP00000306245,9606.ENSP00000360025,9606.ENSP00000360266	EREG,FOS,GADD45A,JUN
hsa05166	HTLV-I infection	6	250	0.77	0.0049	9606.ENSP00000239938,9606.ENSP00000242480,9606.ENSP00000306245,9606.ENSP00000344352,9606.ENSP00000360266,9606.ENSP00000469647	EGR1,EGR2,FOS,ATF3,JUN,ZFP36
hsa05164	Influenza A	5	168	0.86	0.0053	9606.ENSP00000263339,9606.ENSP00000306512,9606.ENSP00000307235,9606.ENSP00000360266,9606.ENSP00000473631	IL1A,CXCL8,EIF2AK3,JUN,DNAJC3
hsa04060	Cytokine-cytokine receptor interaction	6	263	0.75	0.0057	9606.ENSP00000263339,9606.ENSP00000296026,9606.ENSP00000306512,9606.ENSP00000326737,9606.ENSP00000427279,9606.ENSP00000478570	IL1A,CXCL3,CXCL8,TNFRSF12A,CXCL2,VEGFA
hsa05134	Legionellosis	3	54	1.13	0.0109	9606.ENSP00000296026,9606.ENSP00000306512,9606.ENSP00000427279	CXCL3,CXCL8,CXCL2
hsa04926	Relaxin signaling pathway	4	130	0.88	0.0139	9606.ENSP00000306245,9606.ENSP00000360266,9606.ENSP00000368683,9606.ENSP00000478570	FOS,JUN,EDN1,VEGFA
hsa04915	Estrogen signaling pathway	4	133	0.87	0.0144	9606.ENSP00000167588,9606.ENSP00000230990,9606.ENSP00000306245,9606.ENSP00000360266	KRT20,HBEGF,FOS,JUN
hsa05120	Epithelial cell signaling in Helicobacter pylori infection	3	66	1.05	0.0162	9606.ENSP00000230990,9606.ENSP00000306512,9606.ENSP00000360266	HBEGF,CXCL8,JUN
hsa05161	Hepatitis B	4	142	0.84	0.0165	9606.ENSP00000242480,9606.ENSP00000306245,9606.ENSP00000306512,9606.ENSP00000360266	EGR2,FOS,CXCL8,JUN
hsa05206	MicroRNAs in cancer	4	149	0.82	0.0187	9606.ENSP00000307305,9606.ENSP00000349547,9606.ENSP00000356438,9606.ENSP00000478570	DDIT4,RASSF1,PTGS2,VEGFA
hsa04012	ErbB signaling pathway	3	83	0.95	0.0261	9606.ENSP00000230990,9606.ENSP00000244869,9606.ENSP00000360266	HBEGF,EREG,JUN
hsa04621	NOD-like receptor signaling pathway	4	166	0.77	0.0261	9606.ENSP00000296026,9606.ENSP00000306512,9606.ENSP00000360266,9606.ENSP00000427279	CXCL3,CXCL8,JUN,CXCL2
hsa05200	Pathways in cancer	7	515	0.52	0.0261	9606.ENSP00000306245,9606.ENSP00000306512,9606.ENSP00000349547,9606.ENSP00000356438,9606.ENSP00000360025,9606.ENSP00000360266,9606.ENSP00000478570	FOS,CXCL8,RASSF1,PTGS2,GADD45A,JUN,VEGFA
hsa05202	Transcriptional misregulation in cancer	4	169	0.76	0.0261	9606.ENSP00000279488,9606.ENSP00000306512,9606.ENSP00000360025,9606.ENSP00000448665	DUSP6,CXCL8,GADD45A,DDIT3
hsa04064	NF-kappa B signaling pathway	3	93	0.9	0.031	9606.ENSP00000306512,9606.ENSP00000356438,9606.ENSP00000427279	CXCL8,PTGS2,CXCL2
hsa01522	Endocrine resistance	3	95	0.89	0.0317	9606.ENSP00000230990,9606.ENSP00000306245,9606.ENSP00000360266	HBEGF,FOS,JUN
hsa05231	Choline metabolism in cancer	3	98	0.87	0.0333	9606.ENSP00000306245,9606.ENSP00000360266,9606.ENSP00000368305	FOS,JUN,GPCPD1
hsa04620	Toll-like receptor signaling pathway	3	102	0.86	0.035	9606.ENSP00000306245,9606.ENSP00000306512,9606.ENSP00000360266	FOS,CXCL8,JUN
hsa05020	Prion diseases	2	33	1.17	0.035	9606.ENSP00000239938,9606.ENSP00000263339	EGR1,IL1A
hsa05142	Chagas disease (American trypanosomiasis)	3	101	0.86	0.035	9606.ENSP00000306245,9606.ENSP00000306512,9606.ENSP00000360266	FOS,CXCL8,JUN

## Sheet: Cntrl_vs_Virus_Bio_Up_24h
Supplementary table S4: Results from the Gene Ontology (GO) analysis in the category for biological process complete (GObp) and Pathway Enrichment (KEGG pathways) in BCoV infected cells at 24 hpi.
#term ID	term description	observed gene count	background gene count	strength	false discovery rate	matching proteins in your network (IDs)	matching proteins in your network (labels)
GO:0036491	regulation of translation initiation in response to endoplasmic reticulum stress	2	3	2.25	0.0015	9606.ENSP00000307235,9606.ENSP00000473631	EIF2AK3,DNAJC3
GO:0032058	positive regulation of translational initiation in response to stress	2	4	2.12	0.0021	9606.ENSP00000200453,9606.ENSP00000473631	PPP1R15A,DNAJC3
GO:0036499	PERK-mediated unfolded protein response	5	12	2.04	2.54e-07	9606.ENSP00000306512,9606.ENSP00000307235,9606.ENSP00000344352,9606.ENSP00000409555,9606.ENSP00000448665	CXCL8,EIF2AK3,ATF3,HERPUD1,DDIT3
GO:0032792	negative regulation of CREB transcription factor activity	2	6	1.95	0.0035	9606.ENSP00000270162,9606.ENSP00000448665	SIK1,DDIT3
GO:0043558	regulation of translational initiation in response to stress	3	10	1.9	0.00021	9606.ENSP00000200453,9606.ENSP00000307235,9606.ENSP00000473631	PPP1R15A,EIF2AK3,DNAJC3
GO:0051409	response to nitrosative stress	2	8	1.82	0.0051	9606.ENSP00000279488,9606.ENSP00000448665	DUSP6,DDIT3
GO:0070417	cellular response to cold	2	8	1.82	0.0051	9606.ENSP00000307235,9606.ENSP00000473631	EIF2AK3,DNAJC3
GO:0035994	response to muscle stretch	4	18	1.77	3e-05	9606.ENSP00000306245,9606.ENSP00000360266,9606.ENSP00000360762,9606.ENSP00000368683	FOS,JUN,ANKRD1,EDN1
GO:0035767	endothelial cell chemotaxis	2	10	1.72	0.0069	9606.ENSP00000440864,9606.ENSP00000478570	NR4A1,VEGFA
GO:0061469	regulation of type B pancreatic cell proliferation	2	10	1.72	0.0069	9606.ENSP00000366702,9606.ENSP00000440864	ERRFI1,NR4A1
GO:0070862	negative regulation of protein exit from endoplasmic reticulum	2	10	1.72	0.0069	9606.ENSP00000326813,9606.ENSP00000344741	YOD1,INSIG1
GO:0006983	ER overload response	2	11	1.68	0.0079	9606.ENSP00000307235,9606.ENSP00000448665	EIF2AK3,DDIT3
GO:0031953	negative regulation of protein autophosphorylation	2	11	1.68	0.0079	9606.ENSP00000360266,9606.ENSP00000366702	JUN,ERRFI1
GO:0006984	ER-nucleus signaling pathway	6	34	1.67	4.6e-07	9606.ENSP00000306512,9606.ENSP00000307235,9606.ENSP00000344352,9606.ENSP00000344741,9606.ENSP00000409555,9606.ENSP00000448665	CXCL8,EIF2AK3,ATF3,INSIG1,HERPUD1,DDIT3
GO:1990440	positive regulation of transcription from RNA polymerase II promoter in response to endoplasmic reticulum stress	2	12	1.64	0.009	9606.ENSP00000344352,9606.ENSP00000448665	ATF3,DDIT3
GO:0031650	regulation of heat generation	2	13	1.61	0.0101	9606.ENSP00000265138,9606.ENSP00000356438	ARRDC3,PTGS2
GO:1900102	negative regulation of endoplasmic reticulum unfolded protein response	2	13	1.61	0.0101	9606.ENSP00000200453,9606.ENSP00000249356	PPP1R15A,DNAJB9
GO:1903894	regulation of IRE1-mediated unfolded protein response	2	13	1.61	0.0101	9606.ENSP00000249356,9606.ENSP00000446479	DNAJB9,FICD
GO:1902624	positive regulation of neutrophil migration	5	34	1.59	9.83e-06	9606.ENSP00000263339,9606.ENSP00000296026,9606.ENSP00000306512,9606.ENSP00000368683,9606.ENSP00000427279	IL1A,CXCL3,CXCL8,EDN1,CXCL2
GO:0071850	mitotic cell cycle arrest	2	14	1.58	0.0113	9606.ENSP00000239223,9606.ENSP00000360025	DUSP1,GADD45A
GO:0090023	positive regulation of neutrophil chemotaxis	4	30	1.55	0.00014	9606.ENSP00000296026,9606.ENSP00000306512,9606.ENSP00000368683,9606.ENSP00000427279	CXCL3,CXCL8,EDN1,CXCL2
GO:0050930	induction of positive chemotaxis	2	15	1.55	0.0127	9606.ENSP00000306512,9606.ENSP00000478570	CXCL8,VEGFA
GO:1900745	positive regulation of p38MAPK cascade	3	23	1.54	0.0014	9606.ENSP00000360025,9606.ENSP00000368727,9606.ENSP00000478570	GADD45A,XDH,VEGFA
GO:0010042	response to manganese ion	2	16	1.52	0.014	9606.ENSP00000307235,9606.ENSP00000356438	EIF2AK3,PTGS2
GO:0071243	cellular response to arsenic-containing substance	2	16	1.52	0.014	9606.ENSP00000314619,9606.ENSP00000344352	ZFAND2A,ATF3
GO:0002042	cell migration involved in sprouting angiogenesis	2	17	1.49	0.015	9606.ENSP00000440864,9606.ENSP00000478570	NR4A1,VEGFA
GO:1903573	negative regulation of response to endoplasmic reticulum stress	5	44	1.48	2.68e-05	9606.ENSP00000200453,9606.ENSP00000249356,9606.ENSP00000326813,9606.ENSP00000409555,9606.ENSP00000473631	PPP1R15A,DNAJB9,YOD1,HERPUD1,DNAJC3
GO:0000188	inactivation of MAPK activity	3	26	1.48	0.0018	9606.ENSP00000239223,9606.ENSP00000279488,9606.ENSP00000288943	DUSP1,DUSP6,DUSP2
GO:0036003	positive regulation of transcription from RNA polymerase II promoter in response to stress	3	26	1.48	0.0018	9606.ENSP00000344352,9606.ENSP00000448665,9606.ENSP00000478570	ATF3,DDIT3,VEGFA
GO:1905897	regulation of response to endoplasmic reticulum stress	9	81	1.47	1.01e-08	9606.ENSP00000200453,9606.ENSP00000249356,9606.ENSP00000307235,9606.ENSP00000326813,9606.ENSP00000409555,9606.ENSP00000432799,9606.ENSP00000446479,9606.ENSP00000448665,9606.ENSP00000473631	PPP1R15A,DNAJB9,EIF2AK3,YOD1,HERPUD1,MANF,FICD,DDIT3,DNAJC3
GO:0010575	positive regulation of vascular endothelial growth factor production	3	27	1.47	0.002	9606.ENSP00000263339,9606.ENSP00000307235,9606.ENSP00000356438	IL1A,EIF2AK3,PTGS2
GO:1900101	regulation of endoplasmic reticulum unfolded protein response	3	27	1.47	0.002	9606.ENSP00000200453,9606.ENSP00000249356,9606.ENSP00000446479	PPP1R15A,DNAJB9,FICD
GO:0001516	prostaglandin biosynthetic process	2	18	1.47	0.0165	9606.ENSP00000356438,9606.ENSP00000368683	PTGS2,EDN1
GO:0030224	monocyte differentiation	2	18	1.47	0.0165	9606.ENSP00000360266,9606.ENSP00000478570	JUN,VEGFA
GO:0045076	regulation of interleukin-2 biosynthetic process	2	18	1.47	0.0165	9606.ENSP00000263339,9606.ENSP00000469647	IL1A,ZFP36
GO:0051385	response to mineralocorticoid	3	29	1.44	0.0023	9606.ENSP00000306245,9606.ENSP00000356954,9606.ENSP00000368683	FOS,CTGF,EDN1
GO:0042474	middle ear morphogenesis	2	20	1.42	0.0187	9606.ENSP00000344741,9606.ENSP00000368683	INSIG1,EDN1
GO:0035914	skeletal muscle cell differentiation	5	52	1.41	4.89e-05	9606.ENSP00000239938,9606.ENSP00000242480,9606.ENSP00000306245,9606.ENSP00000344352,9606.ENSP00000360762	EGR1,EGR2,FOS,ATF3,ANKRD1
GO:0090050	positive regulation of cell migration involved in sprouting angiogenesis	2	21	1.4	0.02	9606.ENSP00000356438,9606.ENSP00000478570	PTGS2,VEGFA
GO:1902235	regulation of endoplasmic reticulum stress-induced intrinsic apoptotic signaling pathway	3	32	1.39	0.0029	9606.ENSP00000307235,9606.ENSP00000409555,9606.ENSP00000448665	EIF2AK3,HERPUD1,DDIT3
GO:0030728	ovulation	2	22	1.38	0.0215	9606.ENSP00000244869,9606.ENSP00000356438	EREG,PTGS2
GO:0048008	platelet-derived growth factor receptor signaling pathway	3	34	1.37	0.0034	9606.ENSP00000273153,9606.ENSP00000420612,9606.ENSP00000478570	CSRNP1,TIPARP,VEGFA
GO:0032897	negative regulation of viral transcription	2	24	1.34	0.0245	9606.ENSP00000360266,9606.ENSP00000469647	JUN,ZFP36
GO:0044319	wound healing, spreading of cells	2	24	1.34	0.0245	9606.ENSP00000230990,9606.ENSP00000398736	HBEGF,CYR61
GO:1905898	positive regulation of response to endoplasmic reticulum stress	3	37	1.33	0.004	9606.ENSP00000200453,9606.ENSP00000409555,9606.ENSP00000448665	PPP1R15A,HERPUD1,DDIT3
GO:0002021	response to dietary excess	2	25	1.33	0.0259	9606.ENSP00000252809,9606.ENSP00000362159	GDF15,SLC25A25
GO:1902895	positive regulation of pri-miRNA transcription by RNA polymerase II	2	25	1.33	0.0259	9606.ENSP00000306245,9606.ENSP00000360266	FOS,JUN
GO:0071548	response to dexamethasone	3	38	1.32	0.0043	9606.ENSP00000307305,9606.ENSP00000366702,9606.ENSP00000368683	DDIT4,ERRFI1,EDN1
GO:0030968	endoplasmic reticulum unfolded protein response	8	103	1.31	4.86e-07	9606.ENSP00000249356,9606.ENSP00000306512,9606.ENSP00000307235,9606.ENSP00000326813,9606.ENSP00000344352,9606.ENSP00000409555,9606.ENSP00000448665,9606.ENSP00000473631	DNAJB9,CXCL8,EIF2AK3,YOD1,ATF3,HERPUD1,DDIT3,DNAJC3
GO:0043618	regulation of transcription from RNA polymerase II promoter in response to stress	5	67	1.3	0.00013	9606.ENSP00000239938,9606.ENSP00000344352,9606.ENSP00000360266,9606.ENSP00000448665,9606.ENSP00000478570	EGR1,ATF3,JUN,DDIT3,VEGFA
GO:0009299	mRNA transcription	2	27	1.29	0.0285	9606.ENSP00000244869,9606.ENSP00000448665	EREG,DDIT3
GO:0071385	cellular response to glucocorticoid stimulus	4	55	1.28	0.00084	9606.ENSP00000307305,9606.ENSP00000366702,9606.ENSP00000368683,9606.ENSP00000469647	DDIT4,ERRFI1,EDN1,ZFP36
GO:0071549	cellular response to dexamethasone stimulus	2	28	1.28	0.0302	9606.ENSP00000307305,9606.ENSP00000366702	DDIT4,ERRFI1
GO:1904292	regulation of ERAD pathway	2	28	1.28	0.0302	9606.ENSP00000326813,9606.ENSP00000409555	YOD1,HERPUD1
GO:0031952	regulation of protein autophosphorylation	3	43	1.27	0.0056	9606.ENSP00000360266,9606.ENSP00000366702,9606.ENSP00000478570	JUN,ERRFI1,VEGFA
GO:0007176	regulation of epidermal growth factor-activated receptor activity	2	29	1.26	0.0318	9606.ENSP00000244869,9606.ENSP00000366702	EREG,ERRFI1
GO:0042036	negative regulation of cytokine biosynthetic process	2	29	1.26	0.0318	9606.ENSP00000366702,9606.ENSP00000469647	ERRFI1,ZFP36
GO:0071470	cellular response to osmotic stress	2	29	1.26	0.0318	9606.ENSP00000356438,9606.ENSP00000366702	PTGS2,ERRFI1
GO:0001569	branching involved in blood vessel morphogenesis	2	30	1.25	0.0332	9606.ENSP00000368683,9606.ENSP00000478570	EDN1,VEGFA
GO:0071542	dopaminergic neuron differentiation	2	30	1.25	0.0332	9606.ENSP00000432799,9606.ENSP00000478570	MANF,VEGFA
GO:0006986	response to unfolded protein	10	153	1.24	6.08e-08	9606.ENSP00000249356,9606.ENSP00000306512,9606.ENSP00000307235,9606.ENSP00000326813,9606.ENSP00000344352,9606.ENSP00000409555,9606.ENSP00000432799,9606.ENSP00000446479,9606.ENSP00000448665,9606.ENSP00000473631	DNAJB9,CXCL8,EIF2AK3,YOD1,ATF3,HERPUD1,MANF,FICD,DDIT3,DNAJC3
GO:0045933	positive regulation of muscle contraction	3	47	1.23	0.0068	9606.ENSP00000356438,9606.ENSP00000356954,9606.ENSP00000368683	PTGS2,CTGF,EDN1
GO:0038128	ERBB2 signaling pathway	2	31	1.23	0.0348	9606.ENSP00000230990,9606.ENSP00000244869	HBEGF,EREG
GO:0060325	face morphogenesis	2	31	1.23	0.0348	9606.ENSP00000273153,9606.ENSP00000420612	CSRNP1,TIPARP
GO:0070059	intrinsic apoptotic signaling pathway in response to endoplasmic reticulum stress	2	31	1.23	0.0348	9606.ENSP00000200453,9606.ENSP00000448665	PPP1R15A,DDIT3
GO:0071276	cellular response to cadmium ion	2	31	1.23	0.0348	9606.ENSP00000306245,9606.ENSP00000360266	FOS,JUN
GO:0048661	positive regulation of smooth muscle cell proliferation	5	80	1.22	0.00024	9606.ENSP00000230990,9606.ENSP00000244869,9606.ENSP00000356438,9606.ENSP00000360266,9606.ENSP00000368683	HBEGF,EREG,PTGS2,JUN,EDN1
GO:0009409	response to cold	3	48	1.22	0.0071	9606.ENSP00000306245,9606.ENSP00000307235,9606.ENSP00000473631	FOS,EIF2AK3,DNAJC3
GO:0060612	adipose tissue development	2	32	1.22	0.0364	9606.ENSP00000265138,9606.ENSP00000362159	ARRDC3,SLC25A25
GO:0061418	regulation of transcription from RNA polymerase II promoter in response to hypoxia	2	32	1.22	0.0364	9606.ENSP00000239938,9606.ENSP00000478570	EGR1,VEGFA
GO:1904707	positive regulation of vascular smooth muscle cell proliferation	2	32	1.22	0.0364	9606.ENSP00000360266,9606.ENSP00000368683	JUN,EDN1
GO:0070373	negative regulation of ERK1 and ERK2 cascade	4	65	1.21	0.0014	9606.ENSP00000239223,9606.ENSP00000279488,9606.ENSP00000344352,9606.ENSP00000366702	DUSP1,DUSP6,ATF3,ERRFI1
GO:0001659	temperature homeostasis	2	33	1.2	0.0382	9606.ENSP00000263339,9606.ENSP00000265138	IL1A,ARRDC3
GO:0045987	positive regulation of smooth muscle contraction	2	33	1.2	0.0382	9606.ENSP00000356438,9606.ENSP00000368683	PTGS2,EDN1
GO:1901216	positive regulation of neuron death	5	85	1.19	0.00031	9606.ENSP00000239938,9606.ENSP00000306245,9606.ENSP00000307305,9606.ENSP00000360266,9606.ENSP00000448665	EGR1,FOS,DDIT4,JUN,DDIT3
GO:0070498	interleukin-1-mediated signaling pathway	3	51	1.19	0.0082	9606.ENSP00000239938,9606.ENSP00000256458,9606.ENSP00000263339	EGR1,IRAK2,IL1A
GO:0032965	regulation of collagen biosynthetic process	2	35	1.18	0.0416	9606.ENSP00000356954,9606.ENSP00000366702	CTGF,ERRFI1
GO:0045740	positive regulation of DNA replication	2	35	1.18	0.0416	9606.ENSP00000244869,9606.ENSP00000360266	EREG,JUN
GO:0045840	positive regulation of mitotic nuclear division	3	54	1.17	0.0093	9606.ENSP00000244869,9606.ENSP00000263339,9606.ENSP00000368683	EREG,IL1A,EDN1
GO:0035924	cellular response to vascular endothelial growth factor stimulus	2	36	1.17	0.0434	9606.ENSP00000440864,9606.ENSP00000478570	NR4A1,VEGFA
GO:0002690	positive regulation of leukocyte chemotaxis	5	91	1.16	0.0004	9606.ENSP00000296026,9606.ENSP00000306512,9606.ENSP00000368683,9606.ENSP00000427279,9606.ENSP00000478570	CXCL3,CXCL8,EDN1,CXCL2,VEGFA
GO:0045823	positive regulation of heart contraction	2	37	1.16	0.0453	9606.ENSP00000356954,9606.ENSP00000368683	CTGF,EDN1
GO:0031960	response to corticosteroid	8	154	1.14	5.57e-06	9606.ENSP00000239223,9606.ENSP00000306245,9606.ENSP00000307305,9606.ENSP00000356438,9606.ENSP00000356954,9606.ENSP00000366702,9606.ENSP00000368683,9606.ENSP00000469647	DUSP1,FOS,DDIT4,PTGS2,CTGF,ERRFI1,EDN1,ZFP36
GO:0042035	regulation of cytokine biosynthetic process	5	96	1.14	0.0005	9606.ENSP00000239938,9606.ENSP00000244869,9606.ENSP00000263339,9606.ENSP00000366702,9606.ENSP00000469647	EGR1,EREG,IL1A,ERRFI1,ZFP36
GO:0042108	positive regulation of cytokine biosynthetic process	3	58	1.14	0.0111	9606.ENSP00000239938,9606.ENSP00000244869,9606.ENSP00000263339	EGR1,EREG,IL1A
GO:0060395	SMAD protein signal transduction	3	58	1.14	0.0111	9606.ENSP00000252809,9606.ENSP00000306245,9606.ENSP00000360266	GDF15,FOS,JUN
GO:0051384	response to glucocorticoid	7	138	1.13	2.88e-05	9606.ENSP00000239223,9606.ENSP00000306245,9606.ENSP00000307305,9606.ENSP00000356438,9606.ENSP00000366702,9606.ENSP00000368683,9606.ENSP00000469647	DUSP1,FOS,DDIT4,PTGS2,ERRFI1,EDN1,ZFP36
GO:0045773	positive regulation of axon extension	2	39	1.13	0.0492	9606.ENSP00000326737,9606.ENSP00000478570	TNFRSF12A,VEGFA
GO:0097756	negative regulation of blood vessel diameter	2	39	1.13	0.0492	9606.ENSP00000356438,9606.ENSP00000368683	PTGS2,EDN1
GO:2000279	negative regulation of DNA biosynthetic process	2	39	1.13	0.0492	9606.ENSP00000239223,9606.ENSP00000360762	DUSP1,ANKRD1
GO:0007519	skeletal muscle tissue development	6	122	1.11	0.00015	9606.ENSP00000239938,9606.ENSP00000242480,9606.ENSP00000306245,9606.ENSP00000344352,9606.ENSP00000360762,9606.ENSP00000368305	EGR1,EGR2,FOS,ATF3,ANKRD1,GPCPD1
GO:0071347	cellular response to interleukin-1	6	124	1.11	0.00016	9606.ENSP00000239938,9606.ENSP00000256458,9606.ENSP00000263339,9606.ENSP00000306512,9606.ENSP00000360762,9606.ENSP00000368683	EGR1,IRAK2,IL1A,CXCL8,ANKRD1,EDN1
GO:0002687	positive regulation of leukocyte migration	6	127	1.1	0.00017	9606.ENSP00000263339,9606.ENSP00000296026,9606.ENSP00000306512,9606.ENSP00000368683,9606.ENSP00000427279,9606.ENSP00000478570	IL1A,CXCL3,CXCL8,EDN1,CXCL2,VEGFA
GO:0071479	cellular response to ionizing radiation	3	64	1.09	0.014	9606.ENSP00000239938,9606.ENSP00000272233,9606.ENSP00000360025	EGR1,RHOB,GADD45A
GO:0071277	cellular response to calcium ion	3	65	1.09	0.0143	9606.ENSP00000306245,9606.ENSP00000360266,9606.ENSP00000368683	FOS,JUN,EDN1
GO:0034976	response to endoplasmic reticulum stress	11	240	1.08	1.74e-07	9606.ENSP00000200453,9606.ENSP00000249356,9606.ENSP00000306512,9606.ENSP00000307235,9606.ENSP00000326813,9606.ENSP00000344352,9606.ENSP00000360266,9606.ENSP00000409555,9606.ENSP00000446479,9606.ENSP00000448665,9606.ENSP00000473631	PPP1R15A,DNAJB9,CXCL8,EIF2AK3,YOD1,ATF3,JUN,HERPUD1,FICD,DDIT3,DNAJC3
GO:0097327	response to antineoplastic agent	4	87	1.08	0.0035	9606.ENSP00000239938,9606.ENSP00000307305,9606.ENSP00000366702,9606.ENSP00000368683	EGR1,DDIT4,ERRFI1,EDN1
GO:0071621	granulocyte chemotaxis	3	66	1.08	0.0149	9606.ENSP00000296026,9606.ENSP00000306512,9606.ENSP00000478570	CXCL3,CXCL8,VEGFA
GO:0010634	positive regulation of epithelial cell migration	6	136	1.07	0.00022	9606.ENSP00000230990,9606.ENSP00000272233,9606.ENSP00000356438,9606.ENSP00000360266,9606.ENSP00000368683,9606.ENSP00000478570	HBEGF,RHOB,PTGS2,JUN,EDN1,VEGFA
GO:0006970	response to osmotic stress	3	68	1.07	0.0159	9606.ENSP00000354543,9606.ENSP00000356438,9606.ENSP00000366702	TSC22D2,PTGS2,ERRFI1
GO:0071774	response to fibroblast growth factor	5	115	1.06	0.001	9606.ENSP00000306512,9606.ENSP00000356954,9606.ENSP00000440864,9606.ENSP00000465617,9606.ENSP00000469647	CXCL8,CTGF,NR4A1,IER2,ZFP36
GO:2000379	positive regulation of reactive oxygen species metabolic process	4	94	1.05	0.0044	9606.ENSP00000356438,9606.ENSP00000360025,9606.ENSP00000368683,9606.ENSP00000368727	PTGS2,GADD45A,EDN1,XDH
GO:0007589	body fluid secretion	3	70	1.05	0.0167	9606.ENSP00000368683,9606.ENSP00000368727,9606.ENSP00000478570	EDN1,XDH,VEGFA
GO:1903524	positive regulation of blood circulation	3	70	1.05	0.0167	9606.ENSP00000356438,9606.ENSP00000356954,9606.ENSP00000368683	PTGS2,CTGF,EDN1
GO:0010595	positive regulation of endothelial cell migration	4	96	1.04	0.0047	9606.ENSP00000272233,9606.ENSP00000356438,9606.ENSP00000368683,9606.ENSP00000478570	RHOB,PTGS2,EDN1,VEGFA
GO:0001525	angiogenesis	12	297	1.03	1.37e-07	9606.ENSP00000244869,9606.ENSP00000272233,9606.ENSP00000306512,9606.ENSP00000307235,9606.ENSP00000326737,9606.ENSP00000356438,9606.ENSP00000356954,9606.ENSP00000360266,9606.ENSP00000368683,9606.ENSP00000398736,9606.ENSP00000440864,9606.ENSP00000478570	EREG,RHOB,CXCL8,EIF2AK3,TNFRSF12A,PTGS2,CTGF,JUN,EDN1,CYR61,NR4A1,VEGFA
GO:0007050	cell cycle arrest	6	149	1.03	0.00035	9606.ENSP00000200453,9606.ENSP00000239223,9606.ENSP00000306512,9606.ENSP00000349547,9606.ENSP00000360025,9606.ENSP00000448665	PPP1R15A,DUSP1,CXCL8,RASSF1,GADD45A,DDIT3
GO:0070098	chemokine-mediated signaling pathway	3	75	1.02	0.0192	9606.ENSP00000296026,9606.ENSP00000306512,9606.ENSP00000427279	CXCL3,CXCL8,CXCL2
GO:0072593	reactive oxygen species metabolic process	4	103	1.01	0.0057	9606.ENSP00000307305,9606.ENSP00000356954,9606.ENSP00000368683,9606.ENSP00000398736	DDIT4,CTGF,EDN1,CYR61
GO:0071260	cellular response to mechanical stimulus	3	78	1.01	0.0209	9606.ENSP00000356438,9606.ENSP00000360025,9606.ENSP00000360762	PTGS2,GADD45A,ANKRD1
GO:0051781	positive regulation of cell division	4	107	0.99	0.0064	9606.ENSP00000244869,9606.ENSP00000263339,9606.ENSP00000368683,9606.ENSP00000478570	EREG,IL1A,EDN1,VEGFA
GO:0044344	cellular response to fibroblast growth factor stimulus	4	108	0.99	0.0065	9606.ENSP00000306512,9606.ENSP00000356954,9606.ENSP00000440864,9606.ENSP00000469647	CXCL8,CTGF,NR4A1,ZFP36
GO:0070542	response to fatty acid	3	82	0.99	0.0234	9606.ENSP00000356438,9606.ENSP00000356954,9606.ENSP00000368683	PTGS2,CTGF,EDN1
GO:0061448	connective tissue development	7	194	0.98	0.00017	9606.ENSP00000239938,9606.ENSP00000265138,9606.ENSP00000307235,9606.ENSP00000356954,9606.ENSP00000362159,9606.ENSP00000368683,9606.ENSP00000398736	EGR1,ARRDC3,EIF2AK3,CTGF,SLC25A25,EDN1,CYR61
GO:0071456	cellular response to hypoxia	5	139	0.98	0.0021	9606.ENSP00000239938,9606.ENSP00000356438,9606.ENSP00000360762,9606.ENSP00000368683,9606.ENSP00000478570	EGR1,PTGS2,ANKRD1,EDN1,VEGFA
GO:0071560	cellular response to transforming growth factor beta stimulus	5	140	0.98	0.0022	9606.ENSP00000252809,9606.ENSP00000306245,9606.ENSP00000360266,9606.ENSP00000360762,9606.ENSP00000368683	GDF15,FOS,JUN,ANKRD1,EDN1
GO:0008585	female gonad development	3	84	0.98	0.0246	9606.ENSP00000244869,9606.ENSP00000420612,9606.ENSP00000478570	EREG,TIPARP,VEGFA
GO:0036503	ERAD pathway	3	85	0.97	0.0253	9606.ENSP00000249356,9606.ENSP00000326813,9606.ENSP00000409555	DNAJB9,YOD1,HERPUD1
GO:0048514	blood vessel morphogenesis	13	381	0.96	1.74e-07	9606.ENSP00000244869,9606.ENSP00000272233,9606.ENSP00000306512,9606.ENSP00000307235,9606.ENSP00000326737,9606.ENSP00000356438,9606.ENSP00000356954,9606.ENSP00000360266,9606.ENSP00000368683,9606.ENSP00000398736,9606.ENSP00000420612,9606.ENSP00000440864,9606.ENSP00000478570	EREG,RHOB,CXCL8,EIF2AK3,TNFRSF12A,PTGS2,CTGF,JUN,EDN1,CYR61,TIPARP,NR4A1,VEGFA
GO:0060021	roof of mouth development	3	87	0.96	0.0264	9606.ENSP00000273153,9606.ENSP00000344741,9606.ENSP00000420612	CSRNP1,INSIG1,TIPARP
GO:0032496	response to lipopolysaccharide	10	298	0.95	7.13e-06	9606.ENSP00000256458,9606.ENSP00000296026,9606.ENSP00000306245,9606.ENSP00000306512,9606.ENSP00000356438,9606.ENSP00000360266,9606.ENSP00000360762,9606.ENSP00000368683,9606.ENSP00000427279,9606.ENSP00000469647	IRAK2,CXCL3,FOS,CXCL8,PTGS2,JUN,ANKRD1,EDN1,CXCL2,ZFP36
GO:0043281	regulation of cysteine-type endopeptidase activity involved in apoptotic process	7	209	0.95	0.00024	9606.ENSP00000307235,9606.ENSP00000356438,9606.ENSP00000356954,9606.ENSP00000368727,9606.ENSP00000398736,9606.ENSP00000409555,9606.ENSP00000478570	EIF2AK3,PTGS2,CTGF,XDH,CYR61,HERPUD1,VEGFA
GO:0071216	cellular response to biotic stimulus	6	176	0.95	0.00076	9606.ENSP00000256458,9606.ENSP00000306512,9606.ENSP00000307235,9606.ENSP00000360762,9606.ENSP00000448665,9606.ENSP00000469647	IRAK2,CXCL8,EIF2AK3,ANKRD1,DDIT3,ZFP36
GO:1904018	positive regulation of vasculature development	6	179	0.95	0.00082	9606.ENSP00000239938,9606.ENSP00000263339,9606.ENSP00000272233,9606.ENSP00000306512,9606.ENSP00000356438,9606.ENSP00000478570	EGR1,IL1A,RHOB,CXCL8,PTGS2,VEGFA
GO:0032874	positive regulation of stress-activated MAPK cascade	5	148	0.95	0.0027	9606.ENSP00000356954,9606.ENSP00000360025,9606.ENSP00000368683,9606.ENSP00000368727,9606.ENSP00000478570	CTGF,GADD45A,EDN1,XDH,VEGFA
GO:0045598	regulation of fat cell differentiation	4	120	0.95	0.009	9606.ENSP00000344741,9606.ENSP00000356438,9606.ENSP00000448665,9606.ENSP00000469647	INSIG1,PTGS2,DDIT3,ZFP36
GO:0007179	transforming growth factor beta receptor signaling pathway	3	88	0.95	0.0271	9606.ENSP00000252809,9606.ENSP00000306245,9606.ENSP00000360266	GDF15,FOS,JUN
GO:0001938	positive regulation of endothelial cell proliferation	3	89	0.95	0.0275	9606.ENSP00000360266,9606.ENSP00000440864,9606.ENSP00000478570	JUN,NR4A1,VEGFA
GO:0031640	killing of cells of other organism	3	89	0.95	0.0275	9606.ENSP00000296026,9606.ENSP00000306512,9606.ENSP00000427279	CXCL3,CXCL8,CXCL2
GO:0044364	disruption of cells of other organism	3	89	0.95	0.0275	9606.ENSP00000296026,9606.ENSP00000306512,9606.ENSP00000427279	CXCL3,CXCL8,CXCL2
GO:0009791	post-embryonic development	3	90	0.95	0.0281	9606.ENSP00000273153,9606.ENSP00000420612,9606.ENSP00000478570	CSRNP1,TIPARP,VEGFA
GO:0001944	vasculature development	16	487	0.94	1.01e-08	9606.ENSP00000239938,9606.ENSP00000244869,9606.ENSP00000272233,9606.ENSP00000306512,9606.ENSP00000307235,9606.ENSP00000326737,9606.ENSP00000356438,9606.ENSP00000356954,9606.ENSP00000360266,9606.ENSP00000366702,9606.ENSP00000368683,9606.ENSP00000398736,9606.ENSP00000420612,9606.ENSP00000440864,9606.ENSP00000448665,9606.ENSP00000478570	EGR1,EREG,RHOB,CXCL8,EIF2AK3,TNFRSF12A,PTGS2,CTGF,JUN,ERRFI1,EDN1,CYR61,TIPARP,NR4A1,DDIT3,VEGFA
GO:0060326	cell chemotaxis	6	183	0.94	0.00091	9606.ENSP00000230990,9606.ENSP00000296026,9606.ENSP00000306512,9606.ENSP00000427279,9606.ENSP00000440864,9606.ENSP00000478570	HBEGF,CXCL3,CXCL8,CXCL2,NR4A1,VEGFA
GO:0001936	regulation of endothelial cell proliferation	4	122	0.94	0.0094	9606.ENSP00000360266,9606.ENSP00000368727,9606.ENSP00000440864,9606.ENSP00000478570	JUN,XDH,NR4A1,VEGFA
GO:0043154	negative regulation of cysteine-type endopeptidase activity involved in apoptotic process	3	91	0.94	0.0287	9606.ENSP00000356438,9606.ENSP00000409555,9606.ENSP00000478570	PTGS2,HERPUD1,VEGFA
GO:0001568	blood vessel development	15	464	0.93	3.16e-08	9606.ENSP00000239938,9606.ENSP00000244869,9606.ENSP00000272233,9606.ENSP00000306512,9606.ENSP00000307235,9606.ENSP00000326737,9606.ENSP00000356438,9606.ENSP00000356954,9606.ENSP00000360266,9606.ENSP00000368683,9606.ENSP00000398736,9606.ENSP00000420612,9606.ENSP00000440864,9606.ENSP00000448665,9606.ENSP00000478570	EGR1,EREG,RHOB,CXCL8,EIF2AK3,TNFRSF12A,PTGS2,CTGF,JUN,EDN1,CYR61,TIPARP,NR4A1,DDIT3,VEGFA
GO:0009266	response to temperature stimulus	5	155	0.93	0.0032	9606.ENSP00000263339,9606.ENSP00000306245,9606.ENSP00000307235,9606.ENSP00000356438,9606.ENSP00000473631	IL1A,FOS,EIF2AK3,PTGS2,DNAJC3
GO:0043280	positive regulation of cysteine-type endopeptidase activity involved in apoptotic process	4	123	0.93	0.0097	9606.ENSP00000307235,9606.ENSP00000356954,9606.ENSP00000368727,9606.ENSP00000398736	EIF2AK3,CTGF,XDH,CYR61
GO:0062014	negative regulation of small molecule metabolic process	3	93	0.93	0.0302	9606.ENSP00000270162,9606.ENSP00000307305,9606.ENSP00000344741	SIK1,DDIT4,INSIG1
GO:0060537	muscle tissue development	9	284	0.92	3.46e-05	9606.ENSP00000239938,9606.ENSP00000242480,9606.ENSP00000270162,9606.ENSP00000306245,9606.ENSP00000344352,9606.ENSP00000360762,9606.ENSP00000368305,9606.ENSP00000420612,9606.ENSP00000478570	EGR1,EGR2,SIK1,FOS,ATF3,ANKRD1,GPCPD1,TIPARP,VEGFA
GO:0043409	negative regulation of MAPK cascade	5	158	0.92	0.0034	9606.ENSP00000239223,9606.ENSP00000279488,9606.ENSP00000288943,9606.ENSP00000344352,9606.ENSP00000366702	DUSP1,DUSP6,DUSP2,ATF3,ERRFI1
GO:0030307	positive regulation of cell growth	5	159	0.92	0.0035	9606.ENSP00000230990,9606.ENSP00000326737,9606.ENSP00000368683,9606.ENSP00000427108,9606.ENSP00000478570	HBEGF,TNFRSF12A,EDN1,CDKN2AIP,VEGFA
GO:0051153	regulation of striated muscle cell differentiation	3	96	0.92	0.0321	9606.ENSP00000252809,9606.ENSP00000270162,9606.ENSP00000368683	GDF15,SIK1,EDN1
GO:0045766	positive regulation of angiogenesis	5	162	0.91	0.0037	9606.ENSP00000263339,9606.ENSP00000272233,9606.ENSP00000306512,9606.ENSP00000356438,9606.ENSP00000478570	IL1A,RHOB,CXCL8,PTGS2,VEGFA
GO:0071248	cellular response to metal ion	5	162	0.91	0.0037	9606.ENSP00000306245,9606.ENSP00000307235,9606.ENSP00000356438,9606.ENSP00000360266,9606.ENSP00000368683	FOS,EIF2AK3,PTGS2,JUN,EDN1
GO:0051592	response to calcium ion	4	129	0.91	0.0112	9606.ENSP00000239223,9606.ENSP00000306245,9606.ENSP00000360266,9606.ENSP00000368683	DUSP1,FOS,JUN,EDN1
GO:0051591	response to cAMP	3	98	0.91	0.0335	9606.ENSP00000239223,9606.ENSP00000306245,9606.ENSP00000360266	DUSP1,FOS,JUN
GO:0035335	peptidyl-tyrosine dephosphorylation	3	100	0.9	0.0349	9606.ENSP00000239223,9606.ENSP00000279488,9606.ENSP00000288943	DUSP1,DUSP6,DUSP2
GO:0045444	fat cell differentiation	3	100	0.9	0.0349	9606.ENSP00000242480,9606.ENSP00000356438,9606.ENSP00000440864	EGR2,PTGS2,NR4A1
GO:0070848	response to growth factor	15	507	0.89	7.95e-08	9606.ENSP00000239938,9606.ENSP00000252809,9606.ENSP00000279488,9606.ENSP00000306245,9606.ENSP00000306512,9606.ENSP00000307305,9606.ENSP00000356954,9606.ENSP00000360266,9606.ENSP00000360762,9606.ENSP00000366702,9606.ENSP00000368683,9606.ENSP00000440864,9606.ENSP00000465617,9606.ENSP00000469647,9606.ENSP00000478570	EGR1,GDF15,DUSP6,FOS,CXCL8,DDIT4,CTGF,JUN,ANKRD1,ERRFI1,EDN1,NR4A1,IER2,ZFP36,VEGFA
GO:0014706	striated muscle tissue development	8	271	0.89	0.00016	9606.ENSP00000239938,9606.ENSP00000242480,9606.ENSP00000270162,9606.ENSP00000306245,9606.ENSP00000344352,9606.ENSP00000360762,9606.ENSP00000368305,9606.ENSP00000478570	EGR1,EGR2,SIK1,FOS,ATF3,ANKRD1,GPCPD1,VEGFA
GO:0070372	regulation of ERK1 and ERK2 cascade	8	274	0.89	0.00017	9606.ENSP00000239223,9606.ENSP00000279488,9606.ENSP00000344352,9606.ENSP00000356954,9606.ENSP00000360266,9606.ENSP00000366702,9606.ENSP00000398736,9606.ENSP00000478570	DUSP1,DUSP6,ATF3,CTGF,JUN,ERRFI1,CYR61,VEGFA
GO:0009612	response to mechanical stimulus	6	210	0.88	0.0017	9606.ENSP00000306245,9606.ENSP00000356438,9606.ENSP00000360025,9606.ENSP00000360266,9606.ENSP00000360762,9606.ENSP00000368683	FOS,PTGS2,GADD45A,JUN,ANKRD1,EDN1
GO:0046890	regulation of lipid biosynthetic process	5	174	0.88	0.0048	9606.ENSP00000239938,9606.ENSP00000270162,9606.ENSP00000344741,9606.ENSP00000356438,9606.ENSP00000398736	EGR1,SIK1,INSIG1,PTGS2,CYR61
GO:0042594	response to starvation	5	175	0.88	0.0049	9606.ENSP00000307235,9606.ENSP00000344352,9606.ENSP00000360266,9606.ENSP00000448665,9606.ENSP00000469647	EIF2AK3,ATF3,JUN,DDIT3,ZFP36
GO:0046683	response to organophosphorus	4	138	0.88	0.0138	9606.ENSP00000239223,9606.ENSP00000306245,9606.ENSP00000356438,9606.ENSP00000360266	DUSP1,FOS,PTGS2,JUN
GO:0048545	response to steroid hormone	9	324	0.87	8.16e-05	9606.ENSP00000239223,9606.ENSP00000306245,9606.ENSP00000307305,9606.ENSP00000356438,9606.ENSP00000356954,9606.ENSP00000366702,9606.ENSP00000368683,9606.ENSP00000440864,9606.ENSP00000469647	DUSP1,FOS,DDIT4,PTGS2,CTGF,ERRFI1,EDN1,NR4A1,ZFP36
GO:0008277	regulation of G protein-coupled receptor signaling pathway	4	142	0.87	0.0149	9606.ENSP00000265138,9606.ENSP00000306512,9606.ENSP00000356529,9606.ENSP00000368683	ARRDC3,CXCL8,RGS16,EDN1
GO:0061844	antimicrobial humoral immune response mediated by antimicrobial peptide	3	107	0.87	0.0407	9606.ENSP00000296026,9606.ENSP00000306512,9606.ENSP00000427279	CXCL3,CXCL8,CXCL2
GO:2000278	regulation of DNA biosynthetic process	3	108	0.87	0.0415	9606.ENSP00000239223,9606.ENSP00000360762,9606.ENSP00000478570	DUSP1,ANKRD1,VEGFA
GO:0010942	positive regulation of cell death	18	663	0.86	1.01e-08	9606.ENSP00000239223,9606.ENSP00000239938,9606.ENSP00000270162,9606.ENSP00000272233,9606.ENSP00000279488,9606.ENSP00000306245,9606.ENSP00000307235,9606.ENSP00000307305,9606.ENSP00000326737,9606.ENSP00000344352,9606.ENSP00000356438,9606.ENSP00000356954,9606.ENSP00000360025,9606.ENSP00000360266,9606.ENSP00000360762,9606.ENSP00000368727,9606.ENSP00000398736,9606.ENSP00000448665	DUSP1,EGR1,SIK1,RHOB,DUSP6,FOS,EIF2AK3,DDIT4,TNFRSF12A,ATF3,PTGS2,CTGF,GADD45A,JUN,ANKRD1,XDH,CYR61,DDIT3
GO:0080135	regulation of cellular response to stress	17	618	0.86	2.25e-08	9606.ENSP00000200453,9606.ENSP00000249356,9606.ENSP00000307235,9606.ENSP00000326813,9606.ENSP00000344741,9606.ENSP00000356438,9606.ENSP00000356954,9606.ENSP00000360025,9606.ENSP00000360762,9606.ENSP00000368683,9606.ENSP00000368727,9606.ENSP00000409555,9606.ENSP00000432799,9606.ENSP00000446479,9606.ENSP00000448665,9606.ENSP00000473631,9606.ENSP00000478570	PPP1R15A,DNAJB9,EIF2AK3,YOD1,INSIG1,PTGS2,CTGF,GADD45A,ANKRD1,EDN1,XDH,HERPUD1,MANF,FICD,DDIT3,DNAJC3,VEGFA
GO:0071363	cellular response to growth factor stimulus	13	477	0.86	1.33e-06	9606.ENSP00000239938,9606.ENSP00000252809,9606.ENSP00000306245,9606.ENSP00000306512,9606.ENSP00000307305,9606.ENSP00000356954,9606.ENSP00000360266,9606.ENSP00000360762,9606.ENSP00000366702,9606.ENSP00000368683,9606.ENSP00000440864,9606.ENSP00000469647,9606.ENSP00000478570	EGR1,GDF15,FOS,CXCL8,DDIT4,CTGF,JUN,ANKRD1,ERRFI1,EDN1,NR4A1,ZFP36,VEGFA
GO:0034612	response to tumor necrosis factor	6	217	0.86	0.002	9606.ENSP00000306512,9606.ENSP00000326737,9606.ENSP00000356438,9606.ENSP00000360762,9606.ENSP00000368683,9606.ENSP00000469647	CXCL8,TNFRSF12A,PTGS2,ANKRD1,EDN1,ZFP36
GO:1901654	response to ketone	5	183	0.86	0.0057	9606.ENSP00000239223,9606.ENSP00000306245,9606.ENSP00000307305,9606.ENSP00000366702,9606.ENSP00000368683	DUSP1,FOS,DDIT4,ERRFI1,EDN1
GO:0071222	cellular response to lipopolysaccharide	4	146	0.86	0.0161	9606.ENSP00000256458,9606.ENSP00000306512,9606.ENSP00000360762,9606.ENSP00000469647	IRAK2,CXCL8,ANKRD1,ZFP36
GO:0051216	cartilage development	4	147	0.86	0.0165	9606.ENSP00000307235,9606.ENSP00000356954,9606.ENSP00000368683,9606.ENSP00000398736	EIF2AK3,CTGF,EDN1,CYR61
GO:0051147	regulation of muscle cell differentiation	4	148	0.85	0.0166	9606.ENSP00000244869,9606.ENSP00000252809,9606.ENSP00000270162,9606.ENSP00000368683	EREG,GDF15,SIK1,EDN1
GO:0010212	response to ionizing radiation	4	149	0.85	0.0168	9606.ENSP00000239938,9606.ENSP00000272233,9606.ENSP00000360025,9606.ENSP00000403683	EGR1,RHOB,GADD45A,NABP1
GO:0014074	response to purine-containing compound	4	151	0.85	0.0174	9606.ENSP00000239223,9606.ENSP00000306245,9606.ENSP00000356438,9606.ENSP00000360266	DUSP1,FOS,PTGS2,JUN
GO:0042542	response to hydrogen peroxide	3	112	0.85	0.045	9606.ENSP00000239223,9606.ENSP00000272233,9606.ENSP00000360266	DUSP1,RHOB,JUN
GO:1901342	regulation of vasculature development	8	305	0.84	0.00031	9606.ENSP00000239938,9606.ENSP00000263339,9606.ENSP00000272233,9606.ENSP00000306512,9606.ENSP00000326737,9606.ENSP00000356438,9606.ENSP00000368727,9606.ENSP00000478570	EGR1,IL1A,RHOB,CXCL8,TNFRSF12A,PTGS2,XDH,VEGFA
GO:0000302	response to reactive oxygen species	5	189	0.84	0.0064	9606.ENSP00000239223,9606.ENSP00000272233,9606.ENSP00000306245,9606.ENSP00000360266,9606.ENSP00000368683	DUSP1,RHOB,FOS,JUN,EDN1
GO:0071478	cellular response to radiation	4	153	0.84	0.0179	9606.ENSP00000239938,9606.ENSP00000272233,9606.ENSP00000356438,9606.ENSP00000360025	EGR1,RHOB,PTGS2,GADD45A
GO:0050678	regulation of epithelial cell proliferation	8	311	0.83	0.00035	9606.ENSP00000244869,9606.ENSP00000273668,9606.ENSP00000360266,9606.ENSP00000366702,9606.ENSP00000368727,9606.ENSP00000440864,9606.ENSP00000469647,9606.ENSP00000478570	EREG,EAF2,JUN,ERRFI1,XDH,NR4A1,ZFP36,VEGFA
GO:0071356	cellular response to tumor necrosis factor	5	197	0.83	0.0074	9606.ENSP00000306512,9606.ENSP00000326737,9606.ENSP00000360762,9606.ENSP00000368683,9606.ENSP00000469647	CXCL8,TNFRSF12A,ANKRD1,EDN1,ZFP36
GO:0071383	cellular response to steroid hormone stimulus	5	197	0.83	0.0074	9606.ENSP00000307305,9606.ENSP00000366702,9606.ENSP00000368683,9606.ENSP00000440864,9606.ENSP00000469647	DDIT4,ERRFI1,EDN1,NR4A1,ZFP36
GO:0043065	positive regulation of apoptotic process	15	604	0.82	4.62e-07	9606.ENSP00000239223,9606.ENSP00000270162,9606.ENSP00000272233,9606.ENSP00000279488,9606.ENSP00000307235,9606.ENSP00000326737,9606.ENSP00000344352,9606.ENSP00000356438,9606.ENSP00000356954,9606.ENSP00000360025,9606.ENSP00000360266,9606.ENSP00000360762,9606.ENSP00000368727,9606.ENSP00000398736,9606.ENSP00000448665	DUSP1,SIK1,RHOB,DUSP6,EIF2AK3,TNFRSF12A,ATF3,PTGS2,CTGF,GADD45A,JUN,ANKRD1,XDH,CYR61,DDIT3
GO:2001242	regulation of intrinsic apoptotic signaling pathway	4	159	0.82	0.02	9606.ENSP00000307235,9606.ENSP00000356438,9606.ENSP00000409555,9606.ENSP00000448665	EIF2AK3,PTGS2,HERPUD1,DDIT3
GO:0007088	regulation of mitotic nuclear division	4	160	0.82	0.0203	9606.ENSP00000239223,9606.ENSP00000244869,9606.ENSP00000263339,9606.ENSP00000368683	DUSP1,EREG,IL1A,EDN1
GO:0030335	positive regulation of cell migration	11	452	0.81	2.88e-05	9606.ENSP00000230990,9606.ENSP00000263339,9606.ENSP00000272233,9606.ENSP00000296026,9606.ENSP00000306512,9606.ENSP00000356438,9606.ENSP00000360266,9606.ENSP00000368683,9606.ENSP00000398736,9606.ENSP00000427279,9606.ENSP00000478570	HBEGF,IL1A,RHOB,CXCL3,CXCL8,PTGS2,JUN,EDN1,CYR61,CXCL2,VEGFA
GO:0007517	muscle organ development	7	287	0.81	0.0013	9606.ENSP00000230990,9606.ENSP00000239938,9606.ENSP00000242480,9606.ENSP00000306245,9606.ENSP00000344352,9606.ENSP00000360762,9606.ENSP00000368305	HBEGF,EGR1,EGR2,FOS,ATF3,ANKRD1,GPCPD1
GO:0051896	regulation of protein kinase B signaling	5	203	0.81	0.0083	9606.ENSP00000230990,9606.ENSP00000244869,9606.ENSP00000252809,9606.ENSP00000368727,9606.ENSP00000448665	HBEGF,EREG,GDF15,XDH,DDIT3
GO:0001933	negative regulation of protein phosphorylation	10	422	0.8	9.01e-05	9606.ENSP00000239223,9606.ENSP00000279488,9606.ENSP00000288943,9606.ENSP00000307305,9606.ENSP00000344352,9606.ENSP00000360025,9606.ENSP00000360266,9606.ENSP00000366702,9606.ENSP00000368727,9606.ENSP00000473631	DUSP1,DUSP6,DUSP2,DDIT4,ATF3,GADD45A,JUN,ERRFI1,XDH,DNAJC3
GO:0043405	regulation of MAP kinase activity	8	337	0.8	0.00057	9606.ENSP00000239223,9606.ENSP00000252809,9606.ENSP00000256458,9606.ENSP00000279488,9606.ENSP00000288943,9606.ENSP00000360025,9606.ENSP00000368683,9606.ENSP00000478570	DUSP1,GDF15,IRAK2,DUSP6,DUSP2,GADD45A,EDN1,VEGFA
GO:0006469	negative regulation of protein kinase activity	6	254	0.8	0.0039	9606.ENSP00000239223,9606.ENSP00000279488,9606.ENSP00000288943,9606.ENSP00000360025,9606.ENSP00000366702,9606.ENSP00000473631	DUSP1,DUSP6,DUSP2,GADD45A,ERRFI1,DNAJC3
GO:0036293	response to decreased oxygen levels	7	298	0.79	0.0016	9606.ENSP00000239938,9606.ENSP00000307305,9606.ENSP00000356438,9606.ENSP00000356954,9606.ENSP00000360762,9606.ENSP00000368683,9606.ENSP00000478570	EGR1,DDIT4,PTGS2,CTGF,ANKRD1,EDN1,VEGFA
GO:0071496	cellular response to external stimulus	7	305	0.78	0.0018	9606.ENSP00000306245,9606.ENSP00000307235,9606.ENSP00000344352,9606.ENSP00000356438,9606.ENSP00000360025,9606.ENSP00000360266,9606.ENSP00000360762	FOS,EIF2AK3,ATF3,PTGS2,GADD45A,JUN,ANKRD1
GO:0035690	cellular response to drug	7	310	0.78	0.0019	9606.ENSP00000239938,9606.ENSP00000272233,9606.ENSP00000307305,9606.ENSP00000356438,9606.ENSP00000360762,9606.ENSP00000366702,9606.ENSP00000368683	EGR1,RHOB,DDIT4,PTGS2,ANKRD1,ERRFI1,EDN1
GO:0051348	negative regulation of transferase activity	7	310	0.78	0.0019	9606.ENSP00000239223,9606.ENSP00000279488,9606.ENSP00000288943,9606.ENSP00000360025,9606.ENSP00000366702,9606.ENSP00000469647,9606.ENSP00000473631	DUSP1,DUSP6,DUSP2,GADD45A,ERRFI1,ZFP36,DNAJC3
GO:0043406	positive regulation of MAP kinase activity	6	264	0.78	0.0046	9606.ENSP00000252809,9606.ENSP00000256458,9606.ENSP00000279488,9606.ENSP00000360025,9606.ENSP00000368683,9606.ENSP00000478570	GDF15,IRAK2,DUSP6,GADD45A,EDN1,VEGFA
GO:0072359	circulatory system development	18	807	0.77	9.79e-08	9606.ENSP00000239938,9606.ENSP00000244869,9606.ENSP00000270162,9606.ENSP00000272233,9606.ENSP00000306512,9606.ENSP00000307235,9606.ENSP00000326737,9606.ENSP00000356438,9606.ENSP00000356954,9606.ENSP00000360266,9606.ENSP00000360762,9606.ENSP00000366702,9606.ENSP00000368683,9606.ENSP00000398736,9606.ENSP00000420612,9606.ENSP00000440864,9606.ENSP00000448665,9606.ENSP00000478570	EGR1,EREG,SIK1,RHOB,CXCL8,EIF2AK3,TNFRSF12A,PTGS2,CTGF,JUN,ANKRD1,ERRFI1,EDN1,CYR61,TIPARP,NR4A1,DDIT3,VEGFA
GO:0043434	response to peptide hormone	8	362	0.77	0.00087	9606.ENSP00000239938,9606.ENSP00000242480,9606.ENSP00000244869,9606.ENSP00000356438,9606.ENSP00000356954,9606.ENSP00000366702,9606.ENSP00000368683,9606.ENSP00000440864	EGR1,EGR2,EREG,PTGS2,CTGF,ERRFI1,EDN1,NR4A1
GO:0045765	regulation of angiogenesis	6	277	0.76	0.0056	9606.ENSP00000263339,9606.ENSP00000272233,9606.ENSP00000306512,9606.ENSP00000326737,9606.ENSP00000356438,9606.ENSP00000478570	IL1A,RHOB,CXCL8,TNFRSF12A,PTGS2,VEGFA
GO:0035821	modification of morphology or physiology of other organism	4	182	0.76	0.0286	9606.ENSP00000296026,9606.ENSP00000306512,9606.ENSP00000360266,9606.ENSP00000427279	CXCL3,CXCL8,JUN,CXCL2
GO:1902532	negative regulation of intracellular signal transduction	11	514	0.75	7.77e-05	9606.ENSP00000239223,9606.ENSP00000265138,9606.ENSP00000279488,9606.ENSP00000288943,9606.ENSP00000307305,9606.ENSP00000344352,9606.ENSP00000356438,9606.ENSP00000366702,9606.ENSP00000368727,9606.ENSP00000409555,9606.ENSP00000448665	DUSP1,ARRDC3,DUSP6,DUSP2,DDIT4,ATF3,PTGS2,ERRFI1,XDH,HERPUD1,DDIT3
GO:0045786	negative regulation of cell cycle	11	517	0.75	8.15e-05	9606.ENSP00000200453,9606.ENSP00000239223,9606.ENSP00000272233,9606.ENSP00000306512,9606.ENSP00000349547,9606.ENSP00000356438,9606.ENSP00000360025,9606.ENSP00000370936,9606.ENSP00000403683,9606.ENSP00000440864,9606.ENSP00000448665	PPP1R15A,DUSP1,RHOB,CXCL8,RASSF1,PTGS2,GADD45A,E2F6,NABP1,NR4A1,DDIT3
GO:0009314	response to radiation	9	425	0.75	0.00046	9606.ENSP00000239223,9606.ENSP00000239938,9606.ENSP00000270162,9606.ENSP00000272233,9606.ENSP00000306245,9606.ENSP00000356438,9606.ENSP00000360025,9606.ENSP00000360266,9606.ENSP00000403683	DUSP1,EGR1,SIK1,RHOB,FOS,PTGS2,GADD45A,JUN,NABP1
GO:0071214	cellular response to abiotic stimulus	6	282	0.75	0.006	9606.ENSP00000239938,9606.ENSP00000272233,9606.ENSP00000356438,9606.ENSP00000360025,9606.ENSP00000360762,9606.ENSP00000366702	EGR1,RHOB,PTGS2,GADD45A,ANKRD1,ERRFI1
GO:0031668	cellular response to extracellular stimulus	5	235	0.75	0.0142	9606.ENSP00000306245,9606.ENSP00000307235,9606.ENSP00000344352,9606.ENSP00000356438,9606.ENSP00000360266	FOS,EIF2AK3,ATF3,PTGS2,JUN
GO:0007178	transmembrane receptor protein serine/threonine kinase signaling pathway	4	189	0.75	0.0318	9606.ENSP00000239938,9606.ENSP00000252809,9606.ENSP00000306245,9606.ENSP00000360266	EGR1,GDF15,FOS,JUN
GO:0010469	regulation of signaling receptor activity	12	577	0.74	4.05e-05	9606.ENSP00000230990,9606.ENSP00000244869,9606.ENSP00000252809,9606.ENSP00000263339,9606.ENSP00000296026,9606.ENSP00000306512,9606.ENSP00000356954,9606.ENSP00000366702,9606.ENSP00000368683,9606.ENSP00000427279,9606.ENSP00000432799,9606.ENSP00000478570	HBEGF,EREG,GDF15,IL1A,CXCL3,CXCL8,CTGF,ERRFI1,EDN1,CXCL2,MANF,VEGFA
GO:0010038	response to metal ion	7	339	0.74	0.003	9606.ENSP00000239223,9606.ENSP00000263339,9606.ENSP00000306245,9606.ENSP00000307235,9606.ENSP00000356438,9606.ENSP00000360266,9606.ENSP00000368683	DUSP1,IL1A,FOS,EIF2AK3,PTGS2,JUN,EDN1
GO:0001666	response to hypoxia	6	288	0.74	0.0065	9606.ENSP00000239938,9606.ENSP00000307305,9606.ENSP00000356438,9606.ENSP00000360762,9606.ENSP00000368683,9606.ENSP00000478570	EGR1,DDIT4,PTGS2,ANKRD1,EDN1,VEGFA
GO:0006470	protein dephosphorylation	4	194	0.74	0.0339	9606.ENSP00000200453,9606.ENSP00000239223,9606.ENSP00000279488,9606.ENSP00000288943	PPP1R15A,DUSP1,DUSP6,DUSP2
GO:0097190	apoptotic signaling pathway	6	295	0.73	0.0072	9606.ENSP00000200453,9606.ENSP00000263339,9606.ENSP00000307305,9606.ENSP00000326737,9606.ENSP00000360266,9606.ENSP00000448665	PPP1R15A,IL1A,DDIT4,TNFRSF12A,JUN,DDIT3
GO:0043408	regulation of MAPK cascade	14	712	0.72	1.26e-05	9606.ENSP00000239223,9606.ENSP00000252809,9606.ENSP00000256458,9606.ENSP00000279488,9606.ENSP00000288943,9606.ENSP00000344352,9606.ENSP00000356954,9606.ENSP00000360025,9606.ENSP00000360266,9606.ENSP00000366702,9606.ENSP00000368683,9606.ENSP00000368727,9606.ENSP00000398736,9606.ENSP00000478570	DUSP1,GDF15,IRAK2,DUSP6,DUSP2,ATF3,CTGF,GADD45A,JUN,ERRFI1,EDN1,XDH,CYR61,VEGFA
GO:0071407	cellular response to organic cyclic compound	10	505	0.72	0.0003	9606.ENSP00000239938,9606.ENSP00000307305,9606.ENSP00000344741,9606.ENSP00000356438,9606.ENSP00000360762,9606.ENSP00000366702,9606.ENSP00000368683,9606.ENSP00000420612,9606.ENSP00000440864,9606.ENSP00000469647	EGR1,DDIT4,INSIG1,PTGS2,ANKRD1,ERRFI1,EDN1,TIPARP,NR4A1,ZFP36
GO:0061061	muscle structure development	9	457	0.72	0.00074	9606.ENSP00000230990,9606.ENSP00000239938,9606.ENSP00000242480,9606.ENSP00000270162,9606.ENSP00000306245,9606.ENSP00000344352,9606.ENSP00000360762,9606.ENSP00000368305,9606.ENSP00000478570	HBEGF,EGR1,EGR2,SIK1,FOS,ATF3,ANKRD1,GPCPD1,VEGFA
GO:0001558	regulation of cell growth	8	402	0.72	0.0016	9606.ENSP00000230990,9606.ENSP00000273668,9606.ENSP00000326737,9606.ENSP00000356954,9606.ENSP00000368683,9606.ENSP00000398736,9606.ENSP00000427108,9606.ENSP00000478570	HBEGF,EAF2,TNFRSF12A,CTGF,EDN1,CYR61,CDKN2AIP,VEGFA
GO:0048511	rhythmic process	5	250	0.72	0.0172	9606.ENSP00000239938,9606.ENSP00000242480,9606.ENSP00000244869,9606.ENSP00000270162,9606.ENSP00000360266	EGR1,EGR2,EREG,SIK1,JUN
GO:0033993	response to lipid	16	825	0.71	2.72e-06	9606.ENSP00000239223,9606.ENSP00000256458,9606.ENSP00000296026,9606.ENSP00000306245,9606.ENSP00000306512,9606.ENSP00000307305,9606.ENSP00000344741,9606.ENSP00000356438,9606.ENSP00000356954,9606.ENSP00000360266,9606.ENSP00000360762,9606.ENSP00000366702,9606.ENSP00000368683,9606.ENSP00000427279,9606.ENSP00000440864,9606.ENSP00000469647	DUSP1,IRAK2,CXCL3,FOS,CXCL8,DDIT4,INSIG1,PTGS2,CTGF,JUN,ANKRD1,ERRFI1,EDN1,CXCL2,NR4A1,ZFP36
GO:0048646	anatomical structure formation involved in morphogenesis	16	831	0.71	2.95e-06	9606.ENSP00000239223,9606.ENSP00000242480,9606.ENSP00000244869,9606.ENSP00000272233,9606.ENSP00000288943,9606.ENSP00000306512,9606.ENSP00000307235,9606.ENSP00000326737,9606.ENSP00000356438,9606.ENSP00000356954,9606.ENSP00000360266,9606.ENSP00000360762,9606.ENSP00000368683,9606.ENSP00000398736,9606.ENSP00000440864,9606.ENSP00000478570	DUSP1,EGR2,EREG,RHOB,DUSP2,CXCL8,EIF2AK3,TNFRSF12A,PTGS2,CTGF,JUN,ANKRD1,EDN1,CYR61,NR4A1,VEGFA
GO:0045936	negative regulation of phosphate metabolic process	11	562	0.71	0.00015	9606.ENSP00000200453,9606.ENSP00000239223,9606.ENSP00000279488,9606.ENSP00000288943,9606.ENSP00000307305,9606.ENSP00000344352,9606.ENSP00000360025,9606.ENSP00000360266,9606.ENSP00000366702,9606.ENSP00000368727,9606.ENSP00000473631	PPP1R15A,DUSP1,DUSP6,DUSP2,DDIT4,ATF3,GADD45A,JUN,ERRFI1,XDH,DNAJC3
GO:0007568	aging	5	255	0.71	0.0183	9606.ENSP00000306245,9606.ENSP00000356438,9606.ENSP00000356954,9606.ENSP00000360266,9606.ENSP00000368683	FOS,PTGS2,CTGF,JUN,EDN1
GO:0048705	skeletal system morphogenesis	4	204	0.71	0.039	9606.ENSP00000273153,9606.ENSP00000344741,9606.ENSP00000356954,9606.ENSP00000420612	CSRNP1,INSIG1,CTGF,TIPARP
GO:0031669	cellular response to nutrient levels	4	206	0.71	0.04	9606.ENSP00000307235,9606.ENSP00000344352,9606.ENSP00000356438,9606.ENSP00000360266	EIF2AK3,ATF3,PTGS2,JUN
GO:0031400	negative regulation of protein modification process	11	592	0.69	0.00022	9606.ENSP00000200453,9606.ENSP00000239223,9606.ENSP00000279488,9606.ENSP00000288943,9606.ENSP00000307305,9606.ENSP00000344352,9606.ENSP00000360025,9606.ENSP00000360266,9606.ENSP00000366702,9606.ENSP00000368727,9606.ENSP00000473631	PPP1R15A,DUSP1,DUSP6,DUSP2,DDIT4,ATF3,GADD45A,JUN,ERRFI1,XDH,DNAJC3
GO:0009991	response to extracellular stimulus	9	486	0.69	0.0011	9606.ENSP00000252809,9606.ENSP00000306245,9606.ENSP00000307235,9606.ENSP00000344352,9606.ENSP00000356438,9606.ENSP00000360266,9606.ENSP00000362159,9606.ENSP00000448665,9606.ENSP00000469647	GDF15,FOS,EIF2AK3,ATF3,PTGS2,JUN,SLC25A25,DDIT3,ZFP36
GO:0071396	cellular response to lipid	9	486	0.69	0.0011	9606.ENSP00000256458,9606.ENSP00000306512,9606.ENSP00000307305,9606.ENSP00000344741,9606.ENSP00000360762,9606.ENSP00000366702,9606.ENSP00000368683,9606.ENSP00000440864,9606.ENSP00000469647	IRAK2,CXCL8,DDIT4,INSIG1,ANKRD1,ERRFI1,EDN1,NR4A1,ZFP36
GO:0071900	regulation of protein serine/threonine kinase activity	9	488	0.69	0.0011	9606.ENSP00000239223,9606.ENSP00000252809,9606.ENSP00000256458,9606.ENSP00000279488,9606.ENSP00000288943,9606.ENSP00000350633,9606.ENSP00000360025,9606.ENSP00000368683,9606.ENSP00000478570	DUSP1,GDF15,IRAK2,DUSP6,DUSP2,SERTAD1,GADD45A,EDN1,VEGFA
GO:0001101	response to acid chemical	6	323	0.69	0.0106	9606.ENSP00000239223,9606.ENSP00000239938,9606.ENSP00000356438,9606.ENSP00000356954,9606.ENSP00000368683,9606.ENSP00000478570	DUSP1,EGR1,PTGS2,CTGF,EDN1,VEGFA
GO:0090068	positive regulation of cell cycle process	5	273	0.69	0.023	9606.ENSP00000244869,9606.ENSP00000263339,9606.ENSP00000356954,9606.ENSP00000360025,9606.ENSP00000368683	EREG,IL1A,CTGF,GADD45A,EDN1
GO:0001503	ossification	4	215	0.69	0.0451	9606.ENSP00000307235,9606.ENSP00000356438,9606.ENSP00000356954,9606.ENSP00000398736	EIF2AK3,PTGS2,CTGF,CYR61
GO:0033554	cellular response to stress	28	1553	0.68	2.35e-09	9606.ENSP00000200453,9606.ENSP00000239938,9606.ENSP00000249356,9606.ENSP00000256458,9606.ENSP00000263339,9606.ENSP00000272233,9606.ENSP00000306245,9606.ENSP00000306512,9606.ENSP00000307235,9606.ENSP00000307305,9606.ENSP00000326813,9606.ENSP00000344352,9606.ENSP00000344741,9606.ENSP00000349547,9606.ENSP00000356438,9606.ENSP00000360025,9606.ENSP00000360266,9606.ENSP00000360762,9606.ENSP00000366702,…	PPP1R15A,EGR1,DNAJB9,IRAK2,IL1A,RHOB,FOS,CXCL8,EIF2AK3,DDIT4,YOD1,ATF3,INSIG1,RASSF1,PTGS2,GADD45A,JUN,ANKRD1,ERRFI1,EDN1,NABP1,HERPUD1,CDKN2AIP,FICD,DDIT3,ZFP36,DNAJC3,VEGFA
GO:0009628	response to abiotic stimulus	19	1052	0.68	5.2e-07	9606.ENSP00000239223,9606.ENSP00000239938,9606.ENSP00000263339,9606.ENSP00000270162,9606.ENSP00000272233,9606.ENSP00000306245,9606.ENSP00000307235,9606.ENSP00000307305,9606.ENSP00000354543,9606.ENSP00000356438,9606.ENSP00000356954,9606.ENSP00000360025,9606.ENSP00000360266,9606.ENSP00000360762,9606.ENSP00000366702,9606.ENSP00000368683,9606.ENSP00000403683,9606.ENSP00000473631,9606.ENSP00000478570	DUSP1,EGR1,IL1A,SIK1,RHOB,FOS,EIF2AK3,DDIT4,TSC22D2,PTGS2,CTGF,GADD45A,JUN,ANKRD1,ERRFI1,EDN1,NABP1,DNAJC3,VEGFA
GO:0007169	transmembrane receptor protein tyrosine kinase signaling pathway	9	499	0.68	0.0013	9606.ENSP00000230990,9606.ENSP00000244869,9606.ENSP00000252809,9606.ENSP00000273153,9606.ENSP00000307235,9606.ENSP00000307305,9606.ENSP00000356954,9606.ENSP00000420612,9606.ENSP00000478570	HBEGF,EREG,GDF15,CSRNP1,EIF2AK3,DDIT4,CTGF,TIPARP,VEGFA
GO:2001233	regulation of apoptotic signaling pathway	7	388	0.68	0.0057	9606.ENSP00000263339,9606.ENSP00000307235,9606.ENSP00000326737,9606.ENSP00000344352,9606.ENSP00000356438,9606.ENSP00000409555,9606.ENSP00000448665	IL1A,EIF2AK3,TNFRSF12A,ATF3,PTGS2,HERPUD1,DDIT3
GO:1903320	regulation of protein modification by small protein conjugation or removal	4	220	0.68	0.0481	9606.ENSP00000239938,9606.ENSP00000265138,9606.ENSP00000349547,9606.ENSP00000409555	EGR1,ARRDC3,RASSF1,HERPUD1
GO:0051248	negative regulation of protein metabolic process	19	1075	0.67	7.05e-07	9606.ENSP00000200453,9606.ENSP00000230990,9606.ENSP00000239223,9606.ENSP00000279488,9606.ENSP00000288943,9606.ENSP00000307235,9606.ENSP00000307305,9606.ENSP00000326813,9606.ENSP00000344352,9606.ENSP00000356438,9606.ENSP00000360025,9606.ENSP00000360266,9606.ENSP00000366702,9606.ENSP00000368683,9606.ENSP00000368727,9606.ENSP00000409555,9606.ENSP00000469647,9606.ENSP00000473631,9606.ENSP00000478570	PPP1R15A,HBEGF,DUSP1,DUSP6,DUSP2,EIF2AK3,DDIT4,YOD1,ATF3,PTGS2,GADD45A,JUN,ERRFI1,EDN1,XDH,HERPUD1,ZFP36,DNAJC3,VEGFA
GO:0032269	negative regulation of cellular protein metabolic process	18	1014	0.67	1.44e-06	9606.ENSP00000200453,9606.ENSP00000239223,9606.ENSP00000279488,9606.ENSP00000288943,9606.ENSP00000307235,9606.ENSP00000307305,9606.ENSP00000326813,9606.ENSP00000344352,9606.ENSP00000356438,9606.ENSP00000360025,9606.ENSP00000360266,9606.ENSP00000366702,9606.ENSP00000368683,9606.ENSP00000368727,9606.ENSP00000409555,9606.ENSP00000469647,9606.ENSP00000473631,9606.ENSP00000478570	PPP1R15A,DUSP1,DUSP6,DUSP2,EIF2AK3,DDIT4,YOD1,ATF3,PTGS2,GADD45A,JUN,ERRFI1,EDN1,XDH,HERPUD1,ZFP36,DNAJC3,VEGFA
GO:0045859	regulation of protein kinase activity	14	788	0.67	3.41e-05	9606.ENSP00000239223,9606.ENSP00000239938,9606.ENSP00000244869,9606.ENSP00000252809,9606.ENSP00000256458,9606.ENSP00000279488,9606.ENSP00000288943,9606.ENSP00000350633,9606.ENSP00000360025,9606.ENSP00000366702,9606.ENSP00000368683,9606.ENSP00000398736,9606.ENSP00000473631,9606.ENSP00000478570	DUSP1,EGR1,EREG,GDF15,IRAK2,DUSP6,DUSP2,SERTAD1,GADD45A,ERRFI1,EDN1,CYR61,DNAJC3,VEGFA
GO:0035295	tube development	14	793	0.67	3.54e-05	9606.ENSP00000244869,9606.ENSP00000272233,9606.ENSP00000306512,9606.ENSP00000307235,9606.ENSP00000326737,9606.ENSP00000356438,9606.ENSP00000356954,9606.ENSP00000360266,9606.ENSP00000366702,9606.ENSP00000368683,9606.ENSP00000398736,9606.ENSP00000420612,9606.ENSP00000440864,9606.ENSP00000478570	EREG,RHOB,CXCL8,EIF2AK3,TNFRSF12A,PTGS2,CTGF,JUN,ERRFI1,EDN1,CYR61,TIPARP,NR4A1,VEGFA
GO:0043410	positive regulation of MAPK cascade	9	512	0.67	0.0015	9606.ENSP00000252809,9606.ENSP00000256458,9606.ENSP00000279488,9606.ENSP00000356954,9606.ENSP00000360025,9606.ENSP00000360266,9606.ENSP00000368683,9606.ENSP00000368727,9606.ENSP00000478570	GDF15,IRAK2,DUSP6,CTGF,GADD45A,JUN,EDN1,XDH,VEGFA
GO:0031667	response to nutrient levels	8	455	0.67	0.0032	9606.ENSP00000252809,9606.ENSP00000307235,9606.ENSP00000344352,9606.ENSP00000356438,9606.ENSP00000360266,9606.ENSP00000362159,9606.ENSP00000448665,9606.ENSP00000469647	GDF15,EIF2AK3,ATF3,PTGS2,JUN,SLC25A25,DDIT3,ZFP36
GO:0014070	response to organic cyclic compound	15	873	0.66	2.21e-05	9606.ENSP00000239223,9606.ENSP00000239938,9606.ENSP00000279488,9606.ENSP00000306245,9606.ENSP00000307305,9606.ENSP00000344741,9606.ENSP00000356438,9606.ENSP00000356954,9606.ENSP00000360266,9606.ENSP00000360762,9606.ENSP00000366702,9606.ENSP00000368683,9606.ENSP00000420612,9606.ENSP00000440864,9606.ENSP00000469647	DUSP1,EGR1,DUSP6,FOS,DDIT4,INSIG1,PTGS2,CTGF,JUN,ANKRD1,ERRFI1,EDN1,TIPARP,NR4A1,ZFP36
GO:0007167	enzyme linked receptor protein signaling pathway	12	698	0.66	0.00019	9606.ENSP00000230990,9606.ENSP00000239938,9606.ENSP00000244869,9606.ENSP00000252809,9606.ENSP00000273153,9606.ENSP00000306245,9606.ENSP00000307235,9606.ENSP00000307305,9606.ENSP00000356954,9606.ENSP00000360266,9606.ENSP00000420612,9606.ENSP00000478570	HBEGF,EGR1,EREG,GDF15,CSRNP1,FOS,EIF2AK3,DDIT4,CTGF,JUN,TIPARP,VEGFA
GO:0045860	positive regulation of protein kinase activity	9	517	0.66	0.0016	9606.ENSP00000239938,9606.ENSP00000244869,9606.ENSP00000252809,9606.ENSP00000256458,9606.ENSP00000279488,9606.ENSP00000360025,9606.ENSP00000368683,9606.ENSP00000398736,9606.ENSP00000478570	EGR1,EREG,GDF15,IRAK2,DUSP6,GADD45A,EDN1,CYR61,VEGFA
GO:0051090	regulation of DNA-binding transcription factor activity	7	403	0.66	0.0068	9606.ENSP00000256458,9606.ENSP00000270162,9606.ENSP00000306245,9606.ENSP00000360266,9606.ENSP00000368683,9606.ENSP00000448665,9606.ENSP00000478570	IRAK2,SIK1,FOS,JUN,EDN1,DDIT3,VEGFA
GO:0045862	positive regulation of proteolysis	6	347	0.66	0.0143	9606.ENSP00000307235,9606.ENSP00000314619,9606.ENSP00000356954,9606.ENSP00000368727,9606.ENSP00000398736,9606.ENSP00000409555	EIF2AK3,ZFAND2A,CTGF,XDH,CYR61,HERPUD1
GO:0080134	regulation of response to stress	22	1299	0.65	1.37e-07	9606.ENSP00000200453,9606.ENSP00000230990,9606.ENSP00000244869,9606.ENSP00000249356,9606.ENSP00000256458,9606.ENSP00000307235,9606.ENSP00000326737,9606.ENSP00000326813,9606.ENSP00000344741,9606.ENSP00000356438,9606.ENSP00000356954,9606.ENSP00000360025,9606.ENSP00000360762,9606.ENSP00000366702,9606.ENSP00000368683,9606.ENSP00000368727,9606.ENSP00000409555,9606.ENSP00000432799,9606.ENSP00000446479,…	PPP1R15A,HBEGF,EREG,DNAJB9,IRAK2,EIF2AK3,TNFRSF12A,YOD1,INSIG1,PTGS2,CTGF,GADD45A,ANKRD1,ERRFI1,EDN1,XDH,HERPUD1,MANF,FICD,DDIT3,DNAJC3,VEGFA
GO:0019221	cytokine-mediated signaling pathway	11	655	0.65	0.00048	9606.ENSP00000239938,9606.ENSP00000244869,9606.ENSP00000256458,9606.ENSP00000263339,9606.ENSP00000296026,9606.ENSP00000306245,9606.ENSP00000306512,9606.ENSP00000326737,9606.ENSP00000356438,9606.ENSP00000427279,9606.ENSP00000478570	EGR1,EREG,IRAK2,IL1A,CXCL3,FOS,CXCL8,TNFRSF12A,PTGS2,CXCL2,VEGFA
GO:0009968	negative regulation of signal transduction	19	1160	0.64	1.89e-06	9606.ENSP00000200453,9606.ENSP00000239223,9606.ENSP00000239938,9606.ENSP00000249356,9606.ENSP00000252809,9606.ENSP00000263339,9606.ENSP00000265138,9606.ENSP00000279488,9606.ENSP00000288943,9606.ENSP00000306512,9606.ENSP00000307305,9606.ENSP00000344352,9606.ENSP00000344741,9606.ENSP00000356438,9606.ENSP00000356529,9606.ENSP00000366702,9606.ENSP00000368727,9606.ENSP00000409555,9606.ENSP00000448665	PPP1R15A,DUSP1,EGR1,DNAJB9,GDF15,IL1A,ARRDC3,DUSP6,DUSP2,CXCL8,DDIT4,ATF3,INSIG1,PTGS2,RGS16,ERRFI1,XDH,HERPUD1,DDIT3
GO:0051338	regulation of transferase activity	16	964	0.64	1.51e-05	9606.ENSP00000239223,9606.ENSP00000239938,9606.ENSP00000244869,9606.ENSP00000252809,9606.ENSP00000256458,9606.ENSP00000265138,9606.ENSP00000279488,9606.ENSP00000288943,9606.ENSP00000350633,9606.ENSP00000360025,9606.ENSP00000366702,9606.ENSP00000368683,9606.ENSP00000398736,9606.ENSP00000469647,9606.ENSP00000473631,9606.ENSP00000478570	DUSP1,EGR1,EREG,GDF15,IRAK2,ARRDC3,DUSP6,DUSP2,SERTAD1,GADD45A,ERRFI1,EDN1,CYR61,ZFP36,DNAJC3,VEGFA
GO:0009725	response to hormone	14	854	0.64	7.2e-05	9606.ENSP00000239223,9606.ENSP00000239938,9606.ENSP00000242480,9606.ENSP00000244869,9606.ENSP00000270162,9606.ENSP00000306245,9606.ENSP00000307305,9606.ENSP00000356438,9606.ENSP00000356954,9606.ENSP00000360266,9606.ENSP00000366702,9606.ENSP00000368683,9606.ENSP00000440864,9606.ENSP00000469647	DUSP1,EGR1,EGR2,EREG,SIK1,FOS,DDIT4,PTGS2,CTGF,JUN,ERRFI1,EDN1,NR4A1,ZFP36
GO:0006366	transcription by RNA polymerase II	13	784	0.64	0.00014	9606.ENSP00000239938,9606.ENSP00000242480,9606.ENSP00000273153,9606.ENSP00000273668,9606.ENSP00000306245,9606.ENSP00000344352,9606.ENSP00000356954,9606.ENSP00000360266,9606.ENSP00000403683,9606.ENSP00000419923,9606.ENSP00000440864,9606.ENSP00000448665,9606.ENSP00000465617	EGR1,EGR2,CSRNP1,EAF2,FOS,ATF3,CTGF,JUN,NABP1,KLF6,NR4A1,DDIT3,IER2
GO:0006954	inflammatory response	8	482	0.64	0.0043	9606.ENSP00000256458,9606.ENSP00000263339,9606.ENSP00000296026,9606.ENSP00000306245,9606.ENSP00000306512,9606.ENSP00000356438,9606.ENSP00000360266,9606.ENSP00000427279	IRAK2,IL1A,CXCL3,FOS,CXCL8,PTGS2,JUN,CXCL2
GO:0048638	regulation of developmental growth	5	302	0.64	0.0318	9606.ENSP00000252809,9606.ENSP00000279488,9606.ENSP00000326737,9606.ENSP00000368683,9606.ENSP00000478570	GDF15,DUSP6,TNFRSF12A,EDN1,VEGFA
GO:0046677	response to antibiotic	5	305	0.64	0.0324	9606.ENSP00000239223,9606.ENSP00000239938,9606.ENSP00000272233,9606.ENSP00000360266,9606.ENSP00000368683	DUSP1,EGR1,RHOB,JUN,EDN1
GO:0001932	regulation of protein phosphorylation	22	1370	0.63	2.72e-07	9606.ENSP00000230990,9606.ENSP00000239223,9606.ENSP00000239938,9606.ENSP00000244869,9606.ENSP00000252809,9606.ENSP00000256458,9606.ENSP00000279488,9606.ENSP00000288943,9606.ENSP00000307235,9606.ENSP00000307305,9606.ENSP00000344352,9606.ENSP00000350633,9606.ENSP00000356438,9606.ENSP00000356954,9606.ENSP00000360025,9606.ENSP00000360266,9606.ENSP00000366702,9606.ENSP00000368683,9606.ENSP00000368727,…	HBEGF,DUSP1,EGR1,EREG,GDF15,IRAK2,DUSP6,DUSP2,EIF2AK3,DDIT4,ATF3,SERTAD1,PTGS2,CTGF,GADD45A,JUN,ERRFI1,EDN1,XDH,CYR61,DNAJC3,VEGFA
GO:0010243	response to organonitrogen compound	14	876	0.63	9.19e-05	9606.ENSP00000239223,9606.ENSP00000239938,9606.ENSP00000242480,9606.ENSP00000244869,9606.ENSP00000249356,9606.ENSP00000306245,9606.ENSP00000326813,9606.ENSP00000356438,9606.ENSP00000356954,9606.ENSP00000360266,9606.ENSP00000366702,9606.ENSP00000368683,9606.ENSP00000409555,9606.ENSP00000440864	DUSP1,EGR1,EGR2,EREG,DNAJB9,FOS,YOD1,PTGS2,CTGF,JUN,ERRFI1,EDN1,HERPUD1,NR4A1
GO:0043086	negative regulation of catalytic activity	13	809	0.63	0.00017	9606.ENSP00000200453,9606.ENSP00000239223,9606.ENSP00000279488,9606.ENSP00000288943,9606.ENSP00000356438,9606.ENSP00000360025,9606.ENSP00000366702,9606.ENSP00000379201,9606.ENSP00000409555,9606.ENSP00000446479,9606.ENSP00000469647,9606.ENSP00000473631,9606.ENSP00000478570	PPP1R15A,DUSP1,DUSP6,DUSP2,PTGS2,GADD45A,ERRFI1,VCPKMT,HERPUD1,FICD,ZFP36,DNAJC3,VEGFA
GO:0006935	chemotaxis	8	491	0.63	0.0048	9606.ENSP00000230990,9606.ENSP00000242480,9606.ENSP00000296026,9606.ENSP00000306512,9606.ENSP00000398736,9606.ENSP00000427279,9606.ENSP00000440864,9606.ENSP00000478570	HBEGF,EGR2,CXCL3,CXCL8,CYR61,CXCL2,NR4A1,VEGFA
GO:0010035	response to inorganic substance	8	491	0.63	0.0048	9606.ENSP00000239223,9606.ENSP00000263339,9606.ENSP00000272233,9606.ENSP00000306245,9606.ENSP00000307235,9606.ENSP00000356438,9606.ENSP00000360266,9606.ENSP00000368683	DUSP1,IL1A,RHOB,FOS,EIF2AK3,PTGS2,JUN,EDN1
GO:0032103	positive regulation of response to external stimulus	8	499	0.63	0.0052	9606.ENSP00000244869,9606.ENSP00000256458,9606.ENSP00000296026,9606.ENSP00000306512,9606.ENSP00000356438,9606.ENSP00000368683,9606.ENSP00000427279,9606.ENSP00000478570	EREG,IRAK2,CXCL3,CXCL8,PTGS2,EDN1,CXCL2,VEGFA
GO:0006979	response to oxidative stress	6	373	0.63	0.0186	9606.ENSP00000239223,9606.ENSP00000272233,9606.ENSP00000306245,9606.ENSP00000356438,9606.ENSP00000360266,9606.ENSP00000368683	DUSP1,RHOB,FOS,PTGS2,JUN,EDN1
GO:0019216	regulation of lipid metabolic process	6	373	0.63	0.0186	9606.ENSP00000239938,9606.ENSP00000270162,9606.ENSP00000344741,9606.ENSP00000356438,9606.ENSP00000360762,9606.ENSP00000398736	EGR1,SIK1,INSIG1,PTGS2,ANKRD1,CYR61
GO:0045787	positive regulation of cell cycle	6	376	0.63	0.0191	9606.ENSP00000244869,9606.ENSP00000263339,9606.ENSP00000349547,9606.ENSP00000356954,9606.ENSP00000360025,9606.ENSP00000368683	EREG,IL1A,RASSF1,CTGF,GADD45A,EDN1
GO:0002521	leukocyte differentiation	5	313	0.63	0.035	9606.ENSP00000239938,9606.ENSP00000249356,9606.ENSP00000360266,9606.ENSP00000419923,9606.ENSP00000478570	EGR1,DNAJB9,JUN,KLF6,VEGFA
GO:0010648	negative regulation of cell communication	20	1255	0.62	1.31e-06	9606.ENSP00000200453,9606.ENSP00000239223,9606.ENSP00000239938,9606.ENSP00000249356,9606.ENSP00000252809,9606.ENSP00000263339,9606.ENSP00000265138,9606.ENSP00000279488,9606.ENSP00000288943,9606.ENSP00000306512,9606.ENSP00000307305,9606.ENSP00000344352,9606.ENSP00000344741,9606.ENSP00000356438,9606.ENSP00000356529,9606.ENSP00000366702,9606.ENSP00000368683,9606.ENSP00000368727,9606.ENSP00000409555,…	PPP1R15A,DUSP1,EGR1,DNAJB9,GDF15,IL1A,ARRDC3,DUSP6,DUSP2,CXCL8,DDIT4,ATF3,INSIG1,PTGS2,RGS16,ERRFI1,EDN1,XDH,HERPUD1,DDIT3
GO:0023057	negative regulation of signaling	20	1258	0.62	1.33e-06	9606.ENSP00000200453,9606.ENSP00000239223,9606.ENSP00000239938,9606.ENSP00000249356,9606.ENSP00000252809,9606.ENSP00000263339,9606.ENSP00000265138,9606.ENSP00000279488,9606.ENSP00000288943,9606.ENSP00000306512,9606.ENSP00000307305,9606.ENSP00000344352,9606.ENSP00000344741,9606.ENSP00000356438,9606.ENSP00000356529,9606.ENSP00000366702,9606.ENSP00000368683,9606.ENSP00000368727,9606.ENSP00000409555,…	PPP1R15A,DUSP1,EGR1,DNAJB9,GDF15,IL1A,ARRDC3,DUSP6,DUSP2,CXCL8,DDIT4,ATF3,INSIG1,PTGS2,RGS16,ERRFI1,EDN1,XDH,HERPUD1,DDIT3
GO:0051726	regulation of cell cycle	18	1129	0.62	5.64e-06	9606.ENSP00000200453,9606.ENSP00000239223,9606.ENSP00000244869,9606.ENSP00000263339,9606.ENSP00000270162,9606.ENSP00000272233,9606.ENSP00000306512,9606.ENSP00000349547,9606.ENSP00000350633,9606.ENSP00000356438,9606.ENSP00000356954,9606.ENSP00000360025,9606.ENSP00000360266,9606.ENSP00000368683,9606.ENSP00000370936,9606.ENSP00000403683,9606.ENSP00000440864,9606.ENSP00000448665	PPP1R15A,DUSP1,EREG,IL1A,SIK1,RHOB,CXCL8,RASSF1,SERTAD1,PTGS2,CTGF,GADD45A,JUN,EDN1,E2F6,NABP1,NR4A1,DDIT3
GO:1901701	cellular response to oxygen-containing compound	14	896	0.62	0.00012	9606.ENSP00000239938,9606.ENSP00000256458,9606.ENSP00000272233,9606.ENSP00000306245,9606.ENSP00000306512,9606.ENSP00000307305,9606.ENSP00000344741,9606.ENSP00000356438,9606.ENSP00000360266,9606.ENSP00000360762,9606.ENSP00000366702,9606.ENSP00000368683,9606.ENSP00000440864,9606.ENSP00000469647	EGR1,IRAK2,RHOB,FOS,CXCL8,DDIT4,INSIG1,PTGS2,JUN,ANKRD1,ERRFI1,EDN1,NR4A1,ZFP36
GO:0051347	positive regulation of transferase activity	10	630	0.62	0.0015	9606.ENSP00000239938,9606.ENSP00000244869,9606.ENSP00000252809,9606.ENSP00000256458,9606.ENSP00000265138,9606.ENSP00000279488,9606.ENSP00000360025,9606.ENSP00000368683,9606.ENSP00000398736,9606.ENSP00000478570	EGR1,EREG,GDF15,IRAK2,ARRDC3,DUSP6,GADD45A,EDN1,CYR61,VEGFA
GO:0010941	regulation of cell death	25	1638	0.61	7.78e-08	9606.ENSP00000239223,9606.ENSP00000239938,9606.ENSP00000252809,9606.ENSP00000263339,9606.ENSP00000270162,9606.ENSP00000272233,9606.ENSP00000279488,9606.ENSP00000306245,9606.ENSP00000307235,9606.ENSP00000307305,9606.ENSP00000326737,9606.ENSP00000344352,9606.ENSP00000356438,9606.ENSP00000356954,9606.ENSP00000360025,9606.ENSP00000360266,9606.ENSP00000360762,9606.ENSP00000368683,9606.ENSP00000368727,…	DUSP1,EGR1,GDF15,IL1A,SIK1,RHOB,DUSP6,FOS,EIF2AK3,DDIT4,TNFRSF12A,ATF3,PTGS2,CTGF,GADD45A,JUN,ANKRD1,EDN1,XDH,CYR61,HERPUD1,DDIT3,ZFP36,DNAJC3,VEGFA
GO:0042981	regulation of apoptotic process	23	1501	0.61	2.7e-07	9606.ENSP00000239223,9606.ENSP00000239938,9606.ENSP00000252809,9606.ENSP00000263339,9606.ENSP00000270162,9606.ENSP00000272233,9606.ENSP00000279488,9606.ENSP00000307235,9606.ENSP00000326737,9606.ENSP00000344352,9606.ENSP00000356438,9606.ENSP00000356954,9606.ENSP00000360025,9606.ENSP00000360266,9606.ENSP00000360762,9606.ENSP00000368683,9606.ENSP00000368727,9606.ENSP00000398736,9606.ENSP00000409555,…	DUSP1,EGR1,GDF15,IL1A,SIK1,RHOB,DUSP6,EIF2AK3,TNFRSF12A,ATF3,PTGS2,CTGF,GADD45A,JUN,ANKRD1,EDN1,XDH,CYR61,HERPUD1,DDIT3,ZFP36,DNAJC3,VEGFA
GO:0045944	positive regulation of transcription by RNA polymerase II	17	1104	0.61	1.71e-05	9606.ENSP00000239938,9606.ENSP00000242480,9606.ENSP00000263339,9606.ENSP00000273153,9606.ENSP00000273668,9606.ENSP00000306245,9606.ENSP00000344352,9606.ENSP00000344741,9606.ENSP00000350633,9606.ENSP00000360266,9606.ENSP00000368683,9606.ENSP00000398736,9606.ENSP00000419923,9606.ENSP00000440864,9606.ENSP00000448665,9606.ENSP00000465617,9606.ENSP00000478570	EGR1,EGR2,IL1A,CSRNP1,EAF2,FOS,ATF3,INSIG1,SERTAD1,JUN,EDN1,CYR61,KLF6,NR4A1,DDIT3,IER2,VEGFA
GO:0032870	cellular response to hormone stimulus	9	585	0.61	0.0035	9606.ENSP00000239223,9606.ENSP00000270162,9606.ENSP00000306245,9606.ENSP00000307305,9606.ENSP00000360266,9606.ENSP00000366702,9606.ENSP00000368683,9606.ENSP00000440864,9606.ENSP00000469647	DUSP1,SIK1,FOS,DDIT4,JUN,ERRFI1,EDN1,NR4A1,ZFP36
GO:0001501	skeletal system development	7	457	0.61	0.0126	9606.ENSP00000273153,9606.ENSP00000307235,9606.ENSP00000344741,9606.ENSP00000356954,9606.ENSP00000368683,9606.ENSP00000398736,9606.ENSP00000420612	CSRNP1,EIF2AK3,INSIG1,CTGF,EDN1,CYR61,TIPARP
GO:0001819	positive regulation of cytokine production	6	390	0.61	0.0221	9606.ENSP00000239938,9606.ENSP00000244869,9606.ENSP00000263339,9606.ENSP00000307235,9606.ENSP00000356438,9606.ENSP00000448665	EGR1,EREG,IL1A,EIF2AK3,PTGS2,DDIT3
GO:0000165	MAPK cascade	5	323	0.61	0.0391	9606.ENSP00000230990,9606.ENSP00000244869,9606.ENSP00000256458,9606.ENSP00000279488,9606.ENSP00000469647	HBEGF,EREG,IRAK2,DUSP6,ZFP36
GO:0044092	negative regulation of molecular function	17	1119	0.6	1.99e-05	9606.ENSP00000200453,9606.ENSP00000239223,9606.ENSP00000256458,9606.ENSP00000270162,9606.ENSP00000279488,9606.ENSP00000288943,9606.ENSP00000356438,9606.ENSP00000360025,9606.ENSP00000360266,9606.ENSP00000366702,9606.ENSP00000379201,9606.ENSP00000409555,9606.ENSP00000446479,9606.ENSP00000448665,9606.ENSP00000469647,9606.ENSP00000473631,9606.ENSP00000478570	PPP1R15A,DUSP1,IRAK2,SIK1,DUSP6,DUSP2,PTGS2,GADD45A,JUN,ERRFI1,VCPKMT,HERPUD1,FICD,DDIT3,ZFP36,DNAJC3,VEGFA
GO:0040008	regulation of growth	10	663	0.6	0.0021	9606.ENSP00000230990,9606.ENSP00000252809,9606.ENSP00000273668,9606.ENSP00000279488,9606.ENSP00000326737,9606.ENSP00000356954,9606.ENSP00000368683,9606.ENSP00000398736,9606.ENSP00000427108,9606.ENSP00000478570	HBEGF,GDF15,EAF2,DUSP6,TNFRSF12A,CTGF,EDN1,CYR61,CDKN2AIP,VEGFA
GO:0009636	response to toxic substance	7	468	0.6	0.014	9606.ENSP00000239223,9606.ENSP00000239938,9606.ENSP00000272233,9606.ENSP00000306245,9606.ENSP00000356438,9606.ENSP00000360266,9606.ENSP00000368683	DUSP1,EGR1,RHOB,FOS,PTGS2,JUN,EDN1
GO:0062012	regulation of small molecule metabolic process	5	332	0.6	0.0428	9606.ENSP00000239938,9606.ENSP00000270162,9606.ENSP00000307305,9606.ENSP00000344741,9606.ENSP00000356438	EGR1,SIK1,DDIT4,INSIG1,PTGS2
GO:0031399	regulation of protein modification process	26	1747	0.59	6.08e-08	9606.ENSP00000200453,9606.ENSP00000230990,9606.ENSP00000239223,9606.ENSP00000239938,9606.ENSP00000244869,9606.ENSP00000252809,9606.ENSP00000256458,9606.ENSP00000265138,9606.ENSP00000279488,9606.ENSP00000288943,9606.ENSP00000307235,9606.ENSP00000307305,9606.ENSP00000344352,9606.ENSP00000349547,9606.ENSP00000350633,9606.ENSP00000356438,9606.ENSP00000356954,9606.ENSP00000360025,9606.ENSP00000360266,…	PPP1R15A,HBEGF,DUSP1,EGR1,EREG,GDF15,IRAK2,ARRDC3,DUSP6,DUSP2,EIF2AK3,DDIT4,ATF3,RASSF1,SERTAD1,PTGS2,CTGF,GADD45A,JUN,ERRFI1,EDN1,XDH,CYR61,HERPUD1,DNAJC3,VEGFA
GO:0048585	negative regulation of response to stimulus	22	1483	0.59	8.59e-07	9606.ENSP00000200453,9606.ENSP00000239223,9606.ENSP00000239938,9606.ENSP00000249356,9606.ENSP00000252809,9606.ENSP00000263339,9606.ENSP00000265138,9606.ENSP00000279488,9606.ENSP00000288943,9606.ENSP00000306512,9606.ENSP00000307305,9606.ENSP00000326813,9606.ENSP00000344352,9606.ENSP00000344741,9606.ENSP00000356438,9606.ENSP00000356529,9606.ENSP00000366702,9606.ENSP00000368683,9606.ENSP00000368727,…	PPP1R15A,DUSP1,EGR1,DNAJB9,GDF15,IL1A,ARRDC3,DUSP6,DUSP2,CXCL8,DDIT4,YOD1,ATF3,INSIG1,PTGS2,RGS16,ERRFI1,EDN1,XDH,HERPUD1,DDIT3,DNAJC3
GO:0031401	positive regulation of protein modification process	17	1149	0.59	2.75e-05	9606.ENSP00000200453,9606.ENSP00000230990,9606.ENSP00000239938,9606.ENSP00000244869,9606.ENSP00000252809,9606.ENSP00000256458,9606.ENSP00000265138,9606.ENSP00000279488,9606.ENSP00000349547,9606.ENSP00000356438,9606.ENSP00000356954,9606.ENSP00000360025,9606.ENSP00000360266,9606.ENSP00000368683,9606.ENSP00000368727,9606.ENSP00000398736,9606.ENSP00000478570	PPP1R15A,HBEGF,EGR1,EREG,GDF15,IRAK2,ARRDC3,DUSP6,RASSF1,PTGS2,CTGF,GADD45A,JUN,EDN1,XDH,CYR61,VEGFA
GO:0001934	positive regulation of protein phosphorylation	14	941	0.59	0.00017	9606.ENSP00000230990,9606.ENSP00000239938,9606.ENSP00000244869,9606.ENSP00000252809,9606.ENSP00000256458,9606.ENSP00000279488,9606.ENSP00000356438,9606.ENSP00000356954,9606.ENSP00000360025,9606.ENSP00000360266,9606.ENSP00000368683,9606.ENSP00000368727,9606.ENSP00000398736,9606.ENSP00000478570	HBEGF,EGR1,EREG,GDF15,IRAK2,DUSP6,PTGS2,CTGF,GADD45A,JUN,EDN1,XDH,CYR61,VEGFA
GO:0071345	cellular response to cytokine stimulus	14	953	0.59	0.00019	9606.ENSP00000239938,9606.ENSP00000244869,9606.ENSP00000256458,9606.ENSP00000263339,9606.ENSP00000296026,9606.ENSP00000306245,9606.ENSP00000306512,9606.ENSP00000326737,9606.ENSP00000356438,9606.ENSP00000360762,9606.ENSP00000368683,9606.ENSP00000427279,9606.ENSP00000469647,9606.ENSP00000478570	EGR1,EREG,IRAK2,IL1A,CXCL3,FOS,CXCL8,TNFRSF12A,PTGS2,ANKRD1,EDN1,CXCL2,ZFP36,VEGFA
GO:1902533	positive regulation of intracellular signal transduction	14	959	0.59	0.0002	9606.ENSP00000230990,9606.ENSP00000244869,9606.ENSP00000252809,9606.ENSP00000256458,9606.ENSP00000279488,9606.ENSP00000321026,9606.ENSP00000356954,9606.ENSP00000360025,9606.ENSP00000360266,9606.ENSP00000360762,9606.ENSP00000368683,9606.ENSP00000368727,9606.ENSP00000448665,9606.ENSP00000478570	HBEGF,EREG,GDF15,IRAK2,DUSP6,LURAP1L,CTGF,GADD45A,JUN,ANKRD1,EDN1,XDH,DDIT3,VEGFA
GO:0040012	regulation of locomotion	13	881	0.59	0.00035	9606.ENSP00000230990,9606.ENSP00000244869,9606.ENSP00000263339,9606.ENSP00000265138,9606.ENSP00000272233,9606.ENSP00000296026,9606.ENSP00000306512,9606.ENSP00000356438,9606.ENSP00000360266,9606.ENSP00000368683,9606.ENSP00000398736,9606.ENSP00000427279,9606.ENSP00000478570	HBEGF,EREG,IL1A,ARRDC3,RHOB,CXCL3,CXCL8,PTGS2,JUN,EDN1,CYR61,CXCL2,VEGFA
GO:2000145	regulation of cell motility	12	807	0.59	0.00062	9606.ENSP00000230990,9606.ENSP00000244869,9606.ENSP00000263339,9606.ENSP00000272233,9606.ENSP00000296026,9606.ENSP00000306512,9606.ENSP00000356438,9606.ENSP00000360266,9606.ENSP00000368683,9606.ENSP00000398736,9606.ENSP00000427279,9606.ENSP00000478570	HBEGF,EREG,IL1A,RHOB,CXCL3,CXCL8,PTGS2,JUN,EDN1,CYR61,CXCL2,VEGFA
GO:0071310	cellular response to organic substance	32	2219	0.58	2.62e-09	9606.ENSP00000239223,9606.ENSP00000239938,9606.ENSP00000242480,9606.ENSP00000244869,9606.ENSP00000249356,9606.ENSP00000252809,9606.ENSP00000256458,9606.ENSP00000263339,9606.ENSP00000270162,9606.ENSP00000296026,9606.ENSP00000306245,9606.ENSP00000306512,9606.ENSP00000307235,9606.ENSP00000307305,9606.ENSP00000326737,9606.ENSP00000326813,9606.ENSP00000344352,9606.ENSP00000344741,9606.ENSP00000356438,…	DUSP1,EGR1,EGR2,EREG,DNAJB9,GDF15,IRAK2,IL1A,SIK1,CXCL3,FOS,CXCL8,EIF2AK3,DDIT4,TNFRSF12A,YOD1,ATF3,INSIG1,PTGS2,CTGF,JUN,ANKRD1,ERRFI1,EDN1,HERPUD1,TIPARP,CXCL2,NR4A1,DDIT3,ZFP36,DNAJC3,VEGFA
GO:0051247	positive regulation of protein metabolic process	23	1587	0.58	6e-07	9606.ENSP00000200453,9606.ENSP00000230990,9606.ENSP00000239938,9606.ENSP00000244869,9606.ENSP00000252809,9606.ENSP00000256458,9606.ENSP00000263339,9606.ENSP00000265138,9606.ENSP00000279488,9606.ENSP00000307235,9606.ENSP00000314619,9606.ENSP00000349547,9606.ENSP00000356438,9606.ENSP00000356954,9606.ENSP00000360025,9606.ENSP00000360266,9606.ENSP00000368683,9606.ENSP00000368727,9606.ENSP00000398736,…	PPP1R15A,HBEGF,EGR1,EREG,GDF15,IRAK2,IL1A,ARRDC3,DUSP6,EIF2AK3,ZFAND2A,RASSF1,PTGS2,CTGF,GADD45A,JUN,EDN1,XDH,CYR61,HERPUD1,TIPARP,DNAJC3,VEGFA
GO:0034097	response to cytokine	15	1035	0.58	0.00013	9606.ENSP00000239938,9606.ENSP00000244869,9606.ENSP00000256458,9606.ENSP00000263339,9606.ENSP00000296026,9606.ENSP00000306245,9606.ENSP00000306512,9606.ENSP00000326737,9606.ENSP00000356438,9606.ENSP00000360266,9606.ENSP00000360762,9606.ENSP00000368683,9606.ENSP00000427279,9606.ENSP00000469647,9606.ENSP00000478570	EGR1,EREG,IRAK2,IL1A,CXCL3,FOS,CXCL8,TNFRSF12A,PTGS2,JUN,ANKRD1,EDN1,CXCL2,ZFP36,VEGFA
GO:0045937	positive regulation of phosphate metabolic process	15	1052	0.58	0.00014	9606.ENSP00000200453,9606.ENSP00000230990,9606.ENSP00000239938,9606.ENSP00000244869,9606.ENSP00000252809,9606.ENSP00000256458,9606.ENSP00000279488,9606.ENSP00000356438,9606.ENSP00000356954,9606.ENSP00000360025,9606.ENSP00000360266,9606.ENSP00000368683,9606.ENSP00000368727,9606.ENSP00000398736,9606.ENSP00000478570	PPP1R15A,HBEGF,EGR1,EREG,GDF15,IRAK2,DUSP6,PTGS2,CTGF,GADD45A,JUN,EDN1,XDH,CYR61,VEGFA
GO:0032147	activation of protein kinase activity	5	347	0.58	0.0493	9606.ENSP00000252809,9606.ENSP00000256458,9606.ENSP00000279488,9606.ENSP00000360025,9606.ENSP00000478570	GDF15,IRAK2,DUSP6,GADD45A,VEGFA
GO:1902531	regulation of intracellular signal transduction	25	1764	0.57	2.32e-07	9606.ENSP00000230990,9606.ENSP00000239223,9606.ENSP00000244869,9606.ENSP00000252809,9606.ENSP00000256458,9606.ENSP00000265138,9606.ENSP00000272233,9606.ENSP00000279488,9606.ENSP00000288943,9606.ENSP00000307235,9606.ENSP00000307305,9606.ENSP00000321026,9606.ENSP00000344352,9606.ENSP00000356438,9606.ENSP00000356954,9606.ENSP00000360025,9606.ENSP00000360266,9606.ENSP00000360762,9606.ENSP00000366702,…	HBEGF,DUSP1,EREG,GDF15,IRAK2,ARRDC3,RHOB,DUSP6,DUSP2,EIF2AK3,DDIT4,LURAP1L,ATF3,PTGS2,CTGF,GADD45A,JUN,ANKRD1,ERRFI1,EDN1,XDH,CYR61,HERPUD1,DDIT3,VEGFA
GO:0009888	tissue development	23	1626	0.57	8.72e-07	9606.ENSP00000230990,9606.ENSP00000239223,9606.ENSP00000239938,9606.ENSP00000242480,9606.ENSP00000244869,9606.ENSP00000265138,9606.ENSP00000270162,9606.ENSP00000272233,9606.ENSP00000288943,9606.ENSP00000306245,9606.ENSP00000307235,9606.ENSP00000344352,9606.ENSP00000356438,9606.ENSP00000356954,9606.ENSP00000360266,9606.ENSP00000360762,9606.ENSP00000362159,9606.ENSP00000366702,9606.ENSP00000368305,…	HBEGF,DUSP1,EGR1,EGR2,EREG,ARRDC3,SIK1,RHOB,DUSP2,FOS,EIF2AK3,ATF3,PTGS2,CTGF,JUN,ANKRD1,SLC25A25,ERRFI1,GPCPD1,EDN1,CYR61,TIPARP,VEGFA
GO:0032270	positive regulation of cellular protein metabolic process	21	1496	0.57	3.79e-06	9606.ENSP00000200453,9606.ENSP00000230990,9606.ENSP00000239938,9606.ENSP00000244869,9606.ENSP00000252809,9606.ENSP00000256458,9606.ENSP00000265138,9606.ENSP00000279488,9606.ENSP00000307235,9606.ENSP00000314619,9606.ENSP00000349547,9606.ENSP00000356438,9606.ENSP00000356954,9606.ENSP00000360025,9606.ENSP00000360266,9606.ENSP00000368683,9606.ENSP00000368727,9606.ENSP00000398736,9606.ENSP00000409555,…	PPP1R15A,HBEGF,EGR1,EREG,GDF15,IRAK2,ARRDC3,DUSP6,EIF2AK3,ZFAND2A,RASSF1,PTGS2,CTGF,GADD45A,JUN,EDN1,XDH,CYR61,HERPUD1,DNAJC3,VEGFA
GO:1901700	response to oxygen-containing compound	20	1427	0.57	7.45e-06	9606.ENSP00000239223,9606.ENSP00000239938,9606.ENSP00000242480,9606.ENSP00000244869,9606.ENSP00000256458,9606.ENSP00000272233,9606.ENSP00000296026,9606.ENSP00000306245,9606.ENSP00000306512,9606.ENSP00000307305,9606.ENSP00000344741,9606.ENSP00000356438,9606.ENSP00000356954,9606.ENSP00000360266,9606.ENSP00000360762,9606.ENSP00000366702,9606.ENSP00000368683,9606.ENSP00000427279,9606.ENSP00000440864,…	DUSP1,EGR1,EGR2,EREG,IRAK2,RHOB,CXCL3,FOS,CXCL8,DDIT4,INSIG1,PTGS2,CTGF,JUN,ANKRD1,ERRFI1,EDN1,CXCL2,NR4A1,ZFP36
GO:0019220	regulation of phosphate metabolic process	23	1657	0.56	1.19e-06	9606.ENSP00000200453,9606.ENSP00000230990,9606.ENSP00000239223,9606.ENSP00000239938,9606.ENSP00000244869,9606.ENSP00000252809,9606.ENSP00000256458,9606.ENSP00000279488,9606.ENSP00000288943,9606.ENSP00000307235,9606.ENSP00000307305,9606.ENSP00000344352,9606.ENSP00000350633,9606.ENSP00000356438,9606.ENSP00000356954,9606.ENSP00000360025,9606.ENSP00000360266,9606.ENSP00000366702,9606.ENSP00000368683,…	PPP1R15A,HBEGF,DUSP1,EGR1,EREG,GDF15,IRAK2,DUSP6,DUSP2,EIF2AK3,DDIT4,ATF3,SERTAD1,PTGS2,CTGF,GADD45A,JUN,ERRFI1,EDN1,XDH,CYR61,DNAJC3,VEGFA
GO:0008284	positive regulation of cell population proliferation	12	878	0.56	0.0013	9606.ENSP00000230990,9606.ENSP00000239938,9606.ENSP00000244869,9606.ENSP00000344352,9606.ENSP00000350633,9606.ENSP00000356438,9606.ENSP00000356954,9606.ENSP00000360266,9606.ENSP00000368683,9606.ENSP00000398736,9606.ENSP00000440864,9606.ENSP00000478570	HBEGF,EGR1,EREG,ATF3,SERTAD1,PTGS2,CTGF,JUN,EDN1,CYR61,NR4A1,VEGFA
GO:0051346	negative regulation of hydrolase activity	6	438	0.56	0.0335	9606.ENSP00000200453,9606.ENSP00000356438,9606.ENSP00000379201,9606.ENSP00000409555,9606.ENSP00000446479,9606.ENSP00000478570	PPP1R15A,PTGS2,VCPKMT,HERPUD1,FICD,VEGFA
GO:0009719	response to endogenous stimulus	18	1353	0.55	4.87e-05	9606.ENSP00000239223,9606.ENSP00000239938,9606.ENSP00000242480,9606.ENSP00000244869,9606.ENSP00000252809,9606.ENSP00000270162,9606.ENSP00000306245,9606.ENSP00000306512,9606.ENSP00000307305,9606.ENSP00000356438,9606.ENSP00000356954,9606.ENSP00000360266,9606.ENSP00000360762,9606.ENSP00000366702,9606.ENSP00000368683,9606.ENSP00000440864,9606.ENSP00000465617,9606.ENSP00000469647	DUSP1,EGR1,EGR2,EREG,GDF15,SIK1,FOS,CXCL8,DDIT4,PTGS2,CTGF,JUN,ANKRD1,ERRFI1,EDN1,NR4A1,IER2,ZFP36
GO:0071495	cellular response to endogenous stimulus	15	1106	0.55	0.00022	9606.ENSP00000239223,9606.ENSP00000239938,9606.ENSP00000252809,9606.ENSP00000270162,9606.ENSP00000306245,9606.ENSP00000306512,9606.ENSP00000307305,9606.ENSP00000356438,9606.ENSP00000356954,9606.ENSP00000360266,9606.ENSP00000360762,9606.ENSP00000366702,9606.ENSP00000368683,9606.ENSP00000440864,9606.ENSP00000469647	DUSP1,EGR1,GDF15,SIK1,FOS,CXCL8,DDIT4,PTGS2,CTGF,JUN,ANKRD1,ERRFI1,EDN1,NR4A1,ZFP36
GO:0042493	response to drug	12	900	0.55	0.0015	9606.ENSP00000239223,9606.ENSP00000239938,9606.ENSP00000272233,9606.ENSP00000279488,9606.ENSP00000306245,9606.ENSP00000307305,9606.ENSP00000356438,9606.ENSP00000360266,9606.ENSP00000360762,9606.ENSP00000362159,9606.ENSP00000366702,9606.ENSP00000368683	DUSP1,EGR1,RHOB,DUSP6,FOS,DDIT4,PTGS2,JUN,ANKRD1,SLC25A25,ERRFI1,EDN1
GO:0070887	cellular response to chemical stimulus	35	2672	0.54	2.62e-09	9606.ENSP00000230990,9606.ENSP00000239223,9606.ENSP00000239938,9606.ENSP00000242480,9606.ENSP00000244869,9606.ENSP00000249356,9606.ENSP00000252809,9606.ENSP00000256458,9606.ENSP00000263339,9606.ENSP00000270162,9606.ENSP00000272233,9606.ENSP00000296026,9606.ENSP00000306245,9606.ENSP00000306512,9606.ENSP00000307235,9606.ENSP00000307305,9606.ENSP00000314619,9606.ENSP00000326737,9606.ENSP00000326813,…	HBEGF,DUSP1,EGR1,EGR2,EREG,DNAJB9,GDF15,IRAK2,IL1A,SIK1,RHOB,CXCL3,FOS,CXCL8,EIF2AK3,DDIT4,ZFAND2A,TNFRSF12A,YOD1,ATF3,INSIG1,PTGS2,CTGF,JUN,ANKRD1,ERRFI1,EDN1,HERPUD1,TIPARP,CXCL2,NR4A1,DDIT3,ZFP36,DNAJC3,VEGFA
GO:0042127	regulation of cell population proliferation	21	1594	0.54	9.2e-06	9606.ENSP00000230990,9606.ENSP00000239223,9606.ENSP00000239938,9606.ENSP00000244869,9606.ENSP00000263339,9606.ENSP00000273668,9606.ENSP00000296026,9606.ENSP00000306512,9606.ENSP00000344352,9606.ENSP00000350633,9606.ENSP00000356438,9606.ENSP00000356954,9606.ENSP00000360266,9606.ENSP00000366702,9606.ENSP00000368683,9606.ENSP00000368727,9606.ENSP00000398736,9606.ENSP00000427279,9606.ENSP00000440864,…	HBEGF,DUSP1,EGR1,EREG,IL1A,EAF2,CXCL3,CXCL8,ATF3,SERTAD1,PTGS2,CTGF,JUN,ERRFI1,EDN1,XDH,CYR61,CXCL2,NR4A1,ZFP36,VEGFA
GO:0001817	regulation of cytokine production	8	615	0.54	0.0153	9606.ENSP00000239938,9606.ENSP00000244869,9606.ENSP00000263339,9606.ENSP00000307235,9606.ENSP00000356438,9606.ENSP00000366702,9606.ENSP00000448665,9606.ENSP00000469647	EGR1,EREG,IL1A,EIF2AK3,PTGS2,ERRFI1,DDIT3,ZFP36
GO:0010033	response to organic substance	36	2815	0.53	2.62e-09	9606.ENSP00000239223,9606.ENSP00000239938,9606.ENSP00000242480,9606.ENSP00000244869,9606.ENSP00000249356,9606.ENSP00000252809,9606.ENSP00000256458,9606.ENSP00000263339,9606.ENSP00000270162,9606.ENSP00000279488,9606.ENSP00000296026,9606.ENSP00000306245,9606.ENSP00000306512,9606.ENSP00000307235,9606.ENSP00000307305,9606.ENSP00000326737,9606.ENSP00000326813,9606.ENSP00000344352,9606.ENSP00000344741,…	DUSP1,EGR1,EGR2,EREG,DNAJB9,GDF15,IRAK2,IL1A,SIK1,DUSP6,CXCL3,FOS,CXCL8,EIF2AK3,DDIT4,TNFRSF12A,YOD1,ATF3,INSIG1,PTGS2,CTGF,JUN,ANKRD1,ERRFI1,EDN1,HERPUD1,TIPARP,CXCL2,MANF,NR4A1,FICD,DDIT3,IER2,ZFP36,DNAJC3,VEGFA
GO:0009891	positive regulation of biosynthetic process	24	1876	0.53	2.17e-06	9606.ENSP00000200453,9606.ENSP00000239938,9606.ENSP00000242480,9606.ENSP00000244869,9606.ENSP00000263339,9606.ENSP00000273153,9606.ENSP00000273668,9606.ENSP00000306245,9606.ENSP00000307235,9606.ENSP00000344352,9606.ENSP00000344741,9606.ENSP00000350633,9606.ENSP00000356438,9606.ENSP00000356954,9606.ENSP00000360266,9606.ENSP00000360762,9606.ENSP00000368683,9606.ENSP00000398736,9606.ENSP00000419923,…	PPP1R15A,EGR1,EGR2,EREG,IL1A,CSRNP1,EAF2,FOS,EIF2AK3,ATF3,INSIG1,SERTAD1,PTGS2,CTGF,JUN,ANKRD1,EDN1,CYR61,KLF6,NR4A1,DDIT3,IER2,DNAJC3,VEGFA
GO:0009887	animal organ morphogenesis	11	865	0.53	0.0037	9606.ENSP00000244869,9606.ENSP00000273153,9606.ENSP00000344741,9606.ENSP00000356954,9606.ENSP00000360266,9606.ENSP00000360762,9606.ENSP00000366702,9606.ENSP00000368683,9606.ENSP00000398736,9606.ENSP00000420612,9606.ENSP00000478570	EREG,CSRNP1,INSIG1,CTGF,JUN,ANKRD1,ERRFI1,EDN1,CYR61,TIPARP,VEGFA
GO:0009611	response to wounding	7	547	0.53	0.0266	9606.ENSP00000230990,9606.ENSP00000244869,9606.ENSP00000263339,9606.ENSP00000356954,9606.ENSP00000360266,9606.ENSP00000398736,9606.ENSP00000469647	HBEGF,EREG,IL1A,CTGF,JUN,CYR61,ZFP36
GO:0009966	regulation of signal transduction	38	3033	0.52	2.35e-09	9606.ENSP00000200453,9606.ENSP00000230990,9606.ENSP00000239223,9606.ENSP00000239938,9606.ENSP00000244869,9606.ENSP00000249356,9606.ENSP00000252809,9606.ENSP00000256458,9606.ENSP00000263339,9606.ENSP00000265138,9606.ENSP00000272233,9606.ENSP00000279488,9606.ENSP00000288943,9606.ENSP00000296026,9606.ENSP00000306512,9606.ENSP00000307235,9606.ENSP00000307305,9606.ENSP00000321026,9606.ENSP00000326737,…	PPP1R15A,HBEGF,DUSP1,EGR1,EREG,DNAJB9,GDF15,IRAK2,IL1A,ARRDC3,RHOB,DUSP6,DUSP2,CXCL3,CXCL8,EIF2AK3,DDIT4,LURAP1L,TNFRSF12A,ATF3,INSIG1,PTGS2,RGS16,CTGF,GADD45A,JUN,ANKRD1,ERRFI1,EDN1,XDH,CYR61,HERPUD1,CDKN2AIP,CXCL2,MANF,FICD,DDIT3,VEGFA
GO:0031328	positive regulation of cellular biosynthetic process	23	1846	0.52	6.01e-06	9606.ENSP00000200453,9606.ENSP00000239938,9606.ENSP00000242480,9606.ENSP00000244869,9606.ENSP00000263339,9606.ENSP00000273153,9606.ENSP00000273668,9606.ENSP00000306245,9606.ENSP00000307235,9606.ENSP00000344352,9606.ENSP00000344741,9606.ENSP00000350633,9606.ENSP00000356438,9606.ENSP00000360266,9606.ENSP00000360762,9606.ENSP00000368683,9606.ENSP00000398736,9606.ENSP00000419923,9606.ENSP00000440864,…	PPP1R15A,EGR1,EGR2,EREG,IL1A,CSRNP1,EAF2,FOS,EIF2AK3,ATF3,INSIG1,SERTAD1,PTGS2,JUN,ANKRD1,EDN1,CYR61,KLF6,NR4A1,DDIT3,IER2,DNAJC3,VEGFA
GO:0010557	positive regulation of macromolecule biosynthetic process	22	1758	0.52	1.01e-05	9606.ENSP00000200453,9606.ENSP00000239938,9606.ENSP00000242480,9606.ENSP00000244869,9606.ENSP00000263339,9606.ENSP00000273153,9606.ENSP00000273668,9606.ENSP00000306245,9606.ENSP00000307235,9606.ENSP00000344352,9606.ENSP00000344741,9606.ENSP00000350633,9606.ENSP00000360266,9606.ENSP00000360762,9606.ENSP00000368683,9606.ENSP00000398736,9606.ENSP00000419923,9606.ENSP00000440864,9606.ENSP00000448665,…	PPP1R15A,EGR1,EGR2,EREG,IL1A,CSRNP1,EAF2,FOS,EIF2AK3,ATF3,INSIG1,SERTAD1,JUN,ANKRD1,EDN1,CYR61,KLF6,NR4A1,DDIT3,IER2,DNAJC3,VEGFA
GO:0051254	positive regulation of RNA metabolic process	20	1596	0.52	3.23e-05	9606.ENSP00000239938,9606.ENSP00000242480,9606.ENSP00000263339,9606.ENSP00000273153,9606.ENSP00000273668,9606.ENSP00000306245,9606.ENSP00000307235,9606.ENSP00000344352,9606.ENSP00000344741,9606.ENSP00000350633,9606.ENSP00000360266,9606.ENSP00000360762,9606.ENSP00000368683,9606.ENSP00000398736,9606.ENSP00000419923,9606.ENSP00000440864,9606.ENSP00000448665,9606.ENSP00000465617,9606.ENSP00000469647,…	EGR1,EGR2,IL1A,CSRNP1,EAF2,FOS,EIF2AK3,ATF3,INSIG1,SERTAD1,JUN,ANKRD1,EDN1,CYR61,KLF6,NR4A1,DDIT3,IER2,ZFP36,VEGFA
GO:1903508	positive regulation of nucleic acid-templated transcription	19	1520	0.52	5.75e-05	9606.ENSP00000239938,9606.ENSP00000242480,9606.ENSP00000263339,9606.ENSP00000273153,9606.ENSP00000273668,9606.ENSP00000306245,9606.ENSP00000307235,9606.ENSP00000344352,9606.ENSP00000344741,9606.ENSP00000350633,9606.ENSP00000360266,9606.ENSP00000360762,9606.ENSP00000368683,9606.ENSP00000398736,9606.ENSP00000419923,9606.ENSP00000440864,9606.ENSP00000448665,9606.ENSP00000465617,9606.ENSP00000478570	EGR1,EGR2,IL1A,CSRNP1,EAF2,FOS,EIF2AK3,ATF3,INSIG1,SERTAD1,JUN,ANKRD1,EDN1,CYR61,KLF6,NR4A1,DDIT3,IER2,VEGFA
GO:0035556	intracellular signal transduction	19	1528	0.52	6.11e-05	9606.ENSP00000200453,9606.ENSP00000230990,9606.ENSP00000239223,9606.ENSP00000244869,9606.ENSP00000256458,9606.ENSP00000270162,9606.ENSP00000272233,9606.ENSP00000279488,9606.ENSP00000306512,9606.ENSP00000307235,9606.ENSP00000307305,9606.ENSP00000349547,9606.ENSP00000356954,9606.ENSP00000360025,9606.ENSP00000360266,9606.ENSP00000364886,9606.ENSP00000368683,9606.ENSP00000448665,9606.ENSP00000469647	PPP1R15A,HBEGF,DUSP1,EREG,IRAK2,SIK1,RHOB,DUSP6,CXCL8,EIF2AK3,DDIT4,RASSF1,CTGF,GADD45A,JUN,RND3,EDN1,DDIT3,ZFP36
GO:0045893	positive regulation of transcription, DNA-templated	18	1435	0.52	9.67e-05	9606.ENSP00000239938,9606.ENSP00000242480,9606.ENSP00000263339,9606.ENSP00000273153,9606.ENSP00000273668,9606.ENSP00000306245,9606.ENSP00000307235,9606.ENSP00000344352,9606.ENSP00000344741,9606.ENSP00000350633,9606.ENSP00000360266,9606.ENSP00000368683,9606.ENSP00000398736,9606.ENSP00000419923,9606.ENSP00000440864,9606.ENSP00000448665,9606.ENSP00000465617,9606.ENSP00000478570	EGR1,EGR2,IL1A,CSRNP1,EAF2,FOS,EIF2AK3,ATF3,INSIG1,SERTAD1,JUN,EDN1,CYR61,KLF6,NR4A1,DDIT3,IER2,VEGFA
GO:0009607	response to biotic stimulus	15	1206	0.52	0.00052	9606.ENSP00000239938,9606.ENSP00000256458,9606.ENSP00000296026,9606.ENSP00000306245,9606.ENSP00000306512,9606.ENSP00000307235,9606.ENSP00000307305,9606.ENSP00000356438,9606.ENSP00000360266,9606.ENSP00000360762,9606.ENSP00000368683,9606.ENSP00000427279,9606.ENSP00000448665,9606.ENSP00000469647,9606.ENSP00000473631	EGR1,IRAK2,CXCL3,FOS,CXCL8,EIF2AK3,DDIT4,PTGS2,JUN,ANKRD1,EDN1,CXCL2,DDIT3,ZFP36,DNAJC3
GO:0051173	positive regulation of nitrogen compound metabolic process	36	2946	0.51	3.33e-09	9606.ENSP00000200453,9606.ENSP00000230990,9606.ENSP00000239938,9606.ENSP00000242480,9606.ENSP00000244869,9606.ENSP00000252809,9606.ENSP00000256458,9606.ENSP00000263339,9606.ENSP00000265138,9606.ENSP00000273153,9606.ENSP00000273668,9606.ENSP00000279488,9606.ENSP00000306245,9606.ENSP00000307235,9606.ENSP00000314619,9606.ENSP00000344352,9606.ENSP00000344741,9606.ENSP00000349547,9606.ENSP00000350633,…	PPP1R15A,HBEGF,EGR1,EGR2,EREG,GDF15,IRAK2,IL1A,ARRDC3,CSRNP1,EAF2,DUSP6,FOS,EIF2AK3,ZFAND2A,ATF3,INSIG1,RASSF1,SERTAD1,PTGS2,CTGF,GADD45A,JUN,ANKRD1,EDN1,XDH,CYR61,HERPUD1,KLF6,TIPARP,NR4A1,DDIT3,IER2,ZFP36,DNAJC3,VEGFA
GO:0031327	negative regulation of cellular biosynthetic process	18	1479	0.51	0.00014	9606.ENSP00000230990,9606.ENSP00000239223,9606.ENSP00000239938,9606.ENSP00000244869,9606.ENSP00000264444,9606.ENSP00000270162,9606.ENSP00000307235,9606.ENSP00000307305,9606.ENSP00000344352,9606.ENSP00000344741,9606.ENSP00000360266,9606.ENSP00000360762,9606.ENSP00000366702,9606.ENSP00000368683,9606.ENSP00000370936,9606.ENSP00000448665,9606.ENSP00000469647,9606.ENSP00000478570	HBEGF,DUSP1,EGR1,EREG,MXD1,SIK1,EIF2AK3,DDIT4,ATF3,INSIG1,JUN,ANKRD1,ERRFI1,EDN1,E2F6,DDIT3,ZFP36,VEGFA
GO:0043085	positive regulation of catalytic activity	17	1381	0.51	0.00019	9606.ENSP00000200453,9606.ENSP00000239938,9606.ENSP00000244869,9606.ENSP00000252809,9606.ENSP00000256458,9606.ENSP00000265138,9606.ENSP00000279488,9606.ENSP00000307235,9606.ENSP00000356529,9606.ENSP00000356954,9606.ENSP00000360025,9606.ENSP00000360266,9606.ENSP00000366702,9606.ENSP00000368683,9606.ENSP00000368727,9606.ENSP00000398736,9606.ENSP00000478570	PPP1R15A,EGR1,EREG,GDF15,IRAK2,ARRDC3,DUSP6,EIF2AK3,RGS16,CTGF,GADD45A,JUN,ERRFI1,EDN1,XDH,CYR61,VEGFA
GO:0022402	cell cycle process	11	890	0.51	0.0045	9606.ENSP00000200453,9606.ENSP00000239223,9606.ENSP00000244869,9606.ENSP00000272233,9606.ENSP00000306512,9606.ENSP00000349547,9606.ENSP00000360025,9606.ENSP00000370936,9606.ENSP00000403683,9606.ENSP00000448665,9606.ENSP00000484532	PPP1R15A,DUSP1,EREG,RHOB,CXCL8,RASSF1,GADD45A,E2F6,NABP1,DDIT3,MIS12
GO:0045597	positive regulation of cell differentiation	11	908	0.51	0.0051	9606.ENSP00000252809,9606.ENSP00000306245,9606.ENSP00000326737,9606.ENSP00000356438,9606.ENSP00000356954,9606.ENSP00000360266,9606.ENSP00000360762,9606.ENSP00000368683,9606.ENSP00000398736,9606.ENSP00000469647,9606.ENSP00000478570	GDF15,FOS,TNFRSF12A,PTGS2,CTGF,JUN,ANKRD1,EDN1,CYR61,ZFP36,VEGFA
GO:0000122	negative regulation of transcription by RNA polymerase II	10	809	0.51	0.0072	9606.ENSP00000239938,9606.ENSP00000264444,9606.ENSP00000344352,9606.ENSP00000360266,9606.ENSP00000360762,9606.ENSP00000368683,9606.ENSP00000370936,9606.ENSP00000448665,9606.ENSP00000469647,9606.ENSP00000478570	EGR1,MXD1,ATF3,JUN,ANKRD1,EDN1,E2F6,DDIT3,ZFP36,VEGFA
GO:0016477	cell migration	10	812	0.51	0.0074	9606.ENSP00000230990,9606.ENSP00000296026,9606.ENSP00000306512,9606.ENSP00000307305,9606.ENSP00000326737,9606.ENSP00000356954,9606.ENSP00000398736,9606.ENSP00000427279,9606.ENSP00000440864,9606.ENSP00000478570	HBEGF,CXCL3,CXCL8,DDIT4,TNFRSF12A,CTGF,CYR61,CXCL2,NR4A1,VEGFA
GO:0030162	regulation of proteolysis	9	742	0.51	0.0136	9606.ENSP00000307235,9606.ENSP00000314619,9606.ENSP00000326813,9606.ENSP00000356438,9606.ENSP00000356954,9606.ENSP00000368727,9606.ENSP00000398736,9606.ENSP00000409555,9606.ENSP00000478570	EIF2AK3,ZFAND2A,YOD1,PTGS2,CTGF,XDH,CYR61,HERPUD1,VEGFA
GO:0051345	positive regulation of hydrolase activity	9	742	0.51	0.0136	9606.ENSP00000200453,9606.ENSP00000307235,9606.ENSP00000356529,9606.ENSP00000356954,9606.ENSP00000360266,9606.ENSP00000366702,9606.ENSP00000368727,9606.ENSP00000398736,9606.ENSP00000478570	PPP1R15A,EIF2AK3,RGS16,CTGF,JUN,ERRFI1,XDH,CYR61,VEGFA
GO:0007507	heart development	6	485	0.51	0.0492	9606.ENSP00000270162,9606.ENSP00000360266,9606.ENSP00000360762,9606.ENSP00000368683,9606.ENSP00000398736,9606.ENSP00000478570	SIK1,JUN,ANKRD1,EDN1,CYR61,VEGFA
GO:0010628	positive regulation of gene expression	22	1826	0.5	1.73e-05	9606.ENSP00000200453,9606.ENSP00000239938,9606.ENSP00000242480,9606.ENSP00000263339,9606.ENSP00000273153,9606.ENSP00000273668,9606.ENSP00000306245,9606.ENSP00000307235,9606.ENSP00000344352,9606.ENSP00000344741,9606.ENSP00000350633,9606.ENSP00000356954,9606.ENSP00000360266,9606.ENSP00000368683,9606.ENSP00000398736,9606.ENSP00000419923,9606.ENSP00000440864,9606.ENSP00000448665,9606.ENSP00000465617,…	PPP1R15A,EGR1,EGR2,IL1A,CSRNP1,EAF2,FOS,EIF2AK3,ATF3,INSIG1,SERTAD1,CTGF,JUN,EDN1,CYR61,KLF6,NR4A1,DDIT3,IER2,ZFP36,DNAJC3,VEGFA
GO:0045935	positive regulation of nucleobase-containing compound metabolic process	21	1770	0.5	3.7e-05	9606.ENSP00000239938,9606.ENSP00000242480,9606.ENSP00000244869,9606.ENSP00000263339,9606.ENSP00000273153,9606.ENSP00000273668,9606.ENSP00000306245,9606.ENSP00000307235,9606.ENSP00000344352,9606.ENSP00000344741,9606.ENSP00000350633,9606.ENSP00000360266,9606.ENSP00000360762,9606.ENSP00000368683,9606.ENSP00000398736,9606.ENSP00000419923,9606.ENSP00000440864,9606.ENSP00000448665,9606.ENSP00000465617,…	EGR1,EGR2,EREG,IL1A,CSRNP1,EAF2,FOS,EIF2AK3,ATF3,INSIG1,SERTAD1,JUN,ANKRD1,EDN1,CYR61,KLF6,NR4A1,DDIT3,IER2,ZFP36,VEGFA
GO:0009967	positive regulation of signal transduction	18	1493	0.5	0.00015	9606.ENSP00000230990,9606.ENSP00000244869,9606.ENSP00000252809,9606.ENSP00000256458,9606.ENSP00000279488,9606.ENSP00000321026,9606.ENSP00000326737,9606.ENSP00000344352,9606.ENSP00000356954,9606.ENSP00000360025,9606.ENSP00000360266,9606.ENSP00000360762,9606.ENSP00000368683,9606.ENSP00000368727,9606.ENSP00000398736,9606.ENSP00000427108,9606.ENSP00000448665,9606.ENSP00000478570	HBEGF,EREG,GDF15,IRAK2,DUSP6,LURAP1L,TNFRSF12A,ATF3,CTGF,GADD45A,JUN,ANKRD1,EDN1,XDH,CYR61,CDKN2AIP,DDIT3,VEGFA
GO:0006915	apoptotic process	11	915	0.5	0.0054	9606.ENSP00000200453,9606.ENSP00000263339,9606.ENSP00000272233,9606.ENSP00000273153,9606.ENSP00000273668,9606.ENSP00000307305,9606.ENSP00000326737,9606.ENSP00000360025,9606.ENSP00000360266,9606.ENSP00000398736,9606.ENSP00000448665	PPP1R15A,IL1A,RHOB,CSRNP1,EAF2,DDIT4,TNFRSF12A,GADD45A,JUN,CYR61,DDIT3
GO:0048870	cell motility	11	914	0.5	0.0054	9606.ENSP00000230990,9606.ENSP00000296026,9606.ENSP00000306512,9606.ENSP00000307305,9606.ENSP00000326737,9606.ENSP00000356954,9606.ENSP00000398736,9606.ENSP00000427279,9606.ENSP00000440864,9606.ENSP00000465617,9606.ENSP00000478570	HBEGF,CXCL3,CXCL8,DDIT4,TNFRSF12A,CTGF,CYR61,CXCL2,NR4A1,IER2,VEGFA
GO:0008285	negative regulation of cell population proliferation	8	669	0.5	0.0226	9606.ENSP00000239223,9606.ENSP00000244869,9606.ENSP00000263339,9606.ENSP00000273668,9606.ENSP00000306512,9606.ENSP00000356438,9606.ENSP00000360266,9606.ENSP00000368727	DUSP1,EREG,IL1A,EAF2,CXCL8,PTGS2,JUN,XDH
GO:0008283	cell population proliferation	8	676	0.5	0.0238	9606.ENSP00000239938,9606.ENSP00000244869,9606.ENSP00000263339,9606.ENSP00000264444,9606.ENSP00000307305,9606.ENSP00000344741,9606.ENSP00000356954,9606.ENSP00000398736	EGR1,EREG,IL1A,MXD1,DDIT4,INSIG1,CTGF,CYR61
GO:0010646	regulation of cell communication	39	3327	0.49	2.62e-09	9606.ENSP00000200453,9606.ENSP00000230990,9606.ENSP00000239223,9606.ENSP00000239938,9606.ENSP00000242480,9606.ENSP00000244869,9606.ENSP00000249356,9606.ENSP00000252809,9606.ENSP00000256458,9606.ENSP00000263339,9606.ENSP00000265138,9606.ENSP00000272233,9606.ENSP00000279488,9606.ENSP00000288943,9606.ENSP00000296026,9606.ENSP00000306512,9606.ENSP00000307235,9606.ENSP00000307305,9606.ENSP00000321026,…	PPP1R15A,HBEGF,DUSP1,EGR1,EGR2,EREG,DNAJB9,GDF15,IRAK2,IL1A,ARRDC3,RHOB,DUSP6,DUSP2,CXCL3,CXCL8,EIF2AK3,DDIT4,LURAP1L,TNFRSF12A,ATF3,INSIG1,PTGS2,RGS16,CTGF,GADD45A,JUN,ANKRD1,ERRFI1,EDN1,XDH,CYR61,HERPUD1,CDKN2AIP,CXCL2,MANF,FICD,DDIT3,VEGFA
GO:0023051	regulation of signaling	39	3360	0.49	2.62e-09	9606.ENSP00000200453,9606.ENSP00000230990,9606.ENSP00000239223,9606.ENSP00000239938,9606.ENSP00000242480,9606.ENSP00000244869,9606.ENSP00000249356,9606.ENSP00000252809,9606.ENSP00000256458,9606.ENSP00000263339,9606.ENSP00000265138,9606.ENSP00000272233,9606.ENSP00000279488,9606.ENSP00000288943,9606.ENSP00000296026,9606.ENSP00000306512,9606.ENSP00000307235,9606.ENSP00000307305,9606.ENSP00000321026,…	PPP1R15A,HBEGF,DUSP1,EGR1,EGR2,EREG,DNAJB9,GDF15,IRAK2,IL1A,ARRDC3,RHOB,DUSP6,DUSP2,CXCL3,CXCL8,EIF2AK3,DDIT4,LURAP1L,TNFRSF12A,ATF3,INSIG1,PTGS2,RGS16,CTGF,GADD45A,JUN,ANKRD1,ERRFI1,EDN1,XDH,CYR61,HERPUD1,CDKN2AIP,CXCL2,MANF,FICD,DDIT3,VEGFA
GO:0006950	response to stress	38	3267	0.49	2.97e-09	9606.ENSP00000200453,9606.ENSP00000230990,9606.ENSP00000239223,9606.ENSP00000239938,9606.ENSP00000244869,9606.ENSP00000249356,9606.ENSP00000256458,9606.ENSP00000263339,9606.ENSP00000272233,9606.ENSP00000279488,9606.ENSP00000296026,9606.ENSP00000306245,9606.ENSP00000306512,9606.ENSP00000307235,9606.ENSP00000307305,9606.ENSP00000326813,9606.ENSP00000344352,9606.ENSP00000344741,9606.ENSP00000349547,…	PPP1R15A,HBEGF,DUSP1,EGR1,EREG,DNAJB9,IRAK2,IL1A,RHOB,DUSP6,CXCL3,FOS,CXCL8,EIF2AK3,DDIT4,YOD1,ATF3,INSIG1,RASSF1,TSC22D2,PTGS2,CTGF,GADD45A,JUN,ANKRD1,ERRFI1,EDN1,CYR61,NABP1,HERPUD1,CDKN2AIP,CXCL2,MANF,FICD,DDIT3,ZFP36,DNAJC3,VEGFA
GO:0010604	positive regulation of macromolecule metabolic process	36	3081	0.49	1.01e-08	9606.ENSP00000200453,9606.ENSP00000230990,9606.ENSP00000239938,9606.ENSP00000242480,9606.ENSP00000244869,9606.ENSP00000252809,9606.ENSP00000256458,9606.ENSP00000263339,9606.ENSP00000265138,9606.ENSP00000273153,9606.ENSP00000273668,9606.ENSP00000279488,9606.ENSP00000306245,9606.ENSP00000307235,9606.ENSP00000314619,9606.ENSP00000344352,9606.ENSP00000344741,9606.ENSP00000349547,9606.ENSP00000350633,…	PPP1R15A,HBEGF,EGR1,EGR2,EREG,GDF15,IRAK2,IL1A,ARRDC3,CSRNP1,EAF2,DUSP6,FOS,EIF2AK3,ZFAND2A,ATF3,INSIG1,RASSF1,SERTAD1,PTGS2,CTGF,GADD45A,JUN,ANKRD1,EDN1,XDH,CYR61,HERPUD1,KLF6,TIPARP,NR4A1,DDIT3,IER2,ZFP36,DNAJC3,VEGFA
GO:0051246	regulation of protein metabolic process	31	2668	0.49	1.74e-07	9606.ENSP00000200453,9606.ENSP00000230990,9606.ENSP00000239223,9606.ENSP00000239938,9606.ENSP00000244869,9606.ENSP00000252809,9606.ENSP00000256458,9606.ENSP00000263339,9606.ENSP00000265138,9606.ENSP00000279488,9606.ENSP00000288943,9606.ENSP00000307235,9606.ENSP00000307305,9606.ENSP00000314619,9606.ENSP00000326813,9606.ENSP00000344352,9606.ENSP00000349547,9606.ENSP00000350633,9606.ENSP00000356438,…	PPP1R15A,HBEGF,DUSP1,EGR1,EREG,GDF15,IRAK2,IL1A,ARRDC3,DUSP6,DUSP2,EIF2AK3,DDIT4,ZFAND2A,YOD1,ATF3,RASSF1,SERTAD1,PTGS2,CTGF,GADD45A,JUN,ERRFI1,EDN1,XDH,CYR61,HERPUD1,TIPARP,ZFP36,DNAJC3,VEGFA
GO:0032268	regulation of cellular protein metabolic process	29	2486	0.49	5.13e-07	9606.ENSP00000200453,9606.ENSP00000230990,9606.ENSP00000239223,9606.ENSP00000239938,9606.ENSP00000244869,9606.ENSP00000252809,9606.ENSP00000256458,9606.ENSP00000265138,9606.ENSP00000279488,9606.ENSP00000288943,9606.ENSP00000307235,9606.ENSP00000307305,9606.ENSP00000314619,9606.ENSP00000326813,9606.ENSP00000344352,9606.ENSP00000349547,9606.ENSP00000350633,9606.ENSP00000356438,9606.ENSP00000356954,…	PPP1R15A,HBEGF,DUSP1,EGR1,EREG,GDF15,IRAK2,ARRDC3,DUSP6,DUSP2,EIF2AK3,DDIT4,ZFAND2A,YOD1,ATF3,RASSF1,SERTAD1,PTGS2,CTGF,GADD45A,JUN,ERRFI1,EDN1,XDH,CYR61,HERPUD1,ZFP36,DNAJC3,VEGFA
GO:0050790	regulation of catalytic activity	26	2249	0.49	3.54e-06	9606.ENSP00000200453,9606.ENSP00000239223,9606.ENSP00000239938,9606.ENSP00000244869,9606.ENSP00000252809,9606.ENSP00000256458,9606.ENSP00000265138,9606.ENSP00000279488,9606.ENSP00000288943,9606.ENSP00000307235,9606.ENSP00000350633,9606.ENSP00000356438,9606.ENSP00000356529,9606.ENSP00000356954,9606.ENSP00000360025,9606.ENSP00000360266,9606.ENSP00000366702,9606.ENSP00000368683,9606.ENSP00000368727,…	PPP1R15A,DUSP1,EGR1,EREG,GDF15,IRAK2,ARRDC3,DUSP6,DUSP2,EIF2AK3,SERTAD1,PTGS2,RGS16,CTGF,GADD45A,JUN,ERRFI1,EDN1,XDH,VCPKMT,CYR61,HERPUD1,FICD,ZFP36,DNAJC3,VEGFA
GO:0009605	response to external stimulus	25	2152	0.49	5.64e-06	9606.ENSP00000230990,9606.ENSP00000239938,9606.ENSP00000242480,9606.ENSP00000252809,9606.ENSP00000256458,9606.ENSP00000270162,9606.ENSP00000296026,9606.ENSP00000306245,9606.ENSP00000306512,9606.ENSP00000307235,9606.ENSP00000307305,9606.ENSP00000344352,9606.ENSP00000356438,9606.ENSP00000360025,9606.ENSP00000360266,9606.ENSP00000360762,9606.ENSP00000362159,9606.ENSP00000368683,9606.ENSP00000398736,…	HBEGF,EGR1,EGR2,GDF15,IRAK2,SIK1,CXCL3,FOS,CXCL8,EIF2AK3,DDIT4,ATF3,PTGS2,GADD45A,JUN,ANKRD1,SLC25A25,EDN1,CYR61,CXCL2,NR4A1,DDIT3,ZFP36,DNAJC3,VEGFA
GO:0048584	positive regulation of response to stimulus	24	2054	0.49	9.2e-06	9606.ENSP00000200453,9606.ENSP00000230990,9606.ENSP00000244869,9606.ENSP00000252809,9606.ENSP00000256458,9606.ENSP00000279488,9606.ENSP00000296026,9606.ENSP00000306512,9606.ENSP00000321026,9606.ENSP00000326737,9606.ENSP00000344352,9606.ENSP00000356438,9606.ENSP00000356954,9606.ENSP00000360025,9606.ENSP00000360266,9606.ENSP00000360762,9606.ENSP00000368683,9606.ENSP00000368727,9606.ENSP00000398736,…	PPP1R15A,HBEGF,EREG,GDF15,IRAK2,DUSP6,CXCL3,CXCL8,LURAP1L,TNFRSF12A,ATF3,PTGS2,CTGF,GADD45A,JUN,ANKRD1,EDN1,XDH,CYR61,HERPUD1,CDKN2AIP,CXCL2,DDIT3,VEGFA
GO:0010647	positive regulation of cell communication	19	1631	0.49	0.00014	9606.ENSP00000230990,9606.ENSP00000244869,9606.ENSP00000252809,9606.ENSP00000256458,9606.ENSP00000279488,9606.ENSP00000321026,9606.ENSP00000326737,9606.ENSP00000344352,9606.ENSP00000356438,9606.ENSP00000356954,9606.ENSP00000360025,9606.ENSP00000360266,9606.ENSP00000360762,9606.ENSP00000368683,9606.ENSP00000368727,9606.ENSP00000398736,9606.ENSP00000427108,9606.ENSP00000448665,9606.ENSP00000478570	HBEGF,EREG,GDF15,IRAK2,DUSP6,LURAP1L,TNFRSF12A,ATF3,PTGS2,CTGF,GADD45A,JUN,ANKRD1,EDN1,XDH,CYR61,CDKN2AIP,DDIT3,VEGFA
GO:0023056	positive regulation of signaling	19	1638	0.49	0.00014	9606.ENSP00000230990,9606.ENSP00000244869,9606.ENSP00000252809,9606.ENSP00000256458,9606.ENSP00000279488,9606.ENSP00000321026,9606.ENSP00000326737,9606.ENSP00000344352,9606.ENSP00000356438,9606.ENSP00000356954,9606.ENSP00000360025,9606.ENSP00000360266,9606.ENSP00000360762,9606.ENSP00000368683,9606.ENSP00000368727,9606.ENSP00000398736,9606.ENSP00000427108,9606.ENSP00000448665,9606.ENSP00000478570	HBEGF,EREG,GDF15,IRAK2,DUSP6,LURAP1L,TNFRSF12A,ATF3,PTGS2,CTGF,GADD45A,JUN,ANKRD1,EDN1,XDH,CYR61,CDKN2AIP,DDIT3,VEGFA
GO:0051094	positive regulation of developmental process	15	1286	0.49	0.00098	9606.ENSP00000239938,9606.ENSP00000252809,9606.ENSP00000263339,9606.ENSP00000272233,9606.ENSP00000306245,9606.ENSP00000306512,9606.ENSP00000326737,9606.ENSP00000356438,9606.ENSP00000356954,9606.ENSP00000360266,9606.ENSP00000360762,9606.ENSP00000368683,9606.ENSP00000398736,9606.ENSP00000469647,9606.ENSP00000478570	EGR1,GDF15,IL1A,RHOB,FOS,CXCL8,TNFRSF12A,PTGS2,CTGF,JUN,ANKRD1,EDN1,CYR61,ZFP36,VEGFA
GO:0010564	regulation of cell cycle process	8	684	0.49	0.0251	9606.ENSP00000239223,9606.ENSP00000244869,9606.ENSP00000263339,9606.ENSP00000349547,9606.ENSP00000356954,9606.ENSP00000360025,9606.ENSP00000368683,9606.ENSP00000370936	DUSP1,EREG,IL1A,RASSF1,CTGF,GADD45A,EDN1,E2F6
GO:0031325	positive regulation of cellular metabolic process	35	3060	0.48	2.38e-08	9606.ENSP00000200453,9606.ENSP00000230990,9606.ENSP00000239938,9606.ENSP00000242480,9606.ENSP00000244869,9606.ENSP00000252809,9606.ENSP00000256458,9606.ENSP00000263339,9606.ENSP00000265138,9606.ENSP00000273153,9606.ENSP00000273668,9606.ENSP00000279488,9606.ENSP00000306245,9606.ENSP00000307235,9606.ENSP00000314619,9606.ENSP00000344352,9606.ENSP00000344741,9606.ENSP00000349547,9606.ENSP00000350633,…	PPP1R15A,HBEGF,EGR1,EGR2,EREG,GDF15,IRAK2,IL1A,ARRDC3,CSRNP1,EAF2,DUSP6,FOS,EIF2AK3,ZFAND2A,ATF3,INSIG1,RASSF1,SERTAD1,PTGS2,CTGF,GADD45A,JUN,ANKRD1,EDN1,XDH,CYR61,HERPUD1,KLF6,NR4A1,DDIT3,IER2,ZFP36,DNAJC3,VEGFA
GO:0022603	regulation of anatomical structure morphogenesis	11	961	0.48	0.0074	9606.ENSP00000252809,9606.ENSP00000263339,9606.ENSP00000272233,9606.ENSP00000279488,9606.ENSP00000306512,9606.ENSP00000326737,9606.ENSP00000356438,9606.ENSP00000368683,9606.ENSP00000368727,9606.ENSP00000372361,9606.ENSP00000478570	GDF15,IL1A,RHOB,DUSP6,CXCL8,TNFRSF12A,PTGS2,EDN1,XDH,ZMYM5,VEGFA
GO:0002684	positive regulation of immune system process	10	882	0.48	0.0127	9606.ENSP00000244869,9606.ENSP00000256458,9606.ENSP00000263339,9606.ENSP00000296026,9606.ENSP00000306245,9606.ENSP00000306512,9606.ENSP00000360266,9606.ENSP00000368683,9606.ENSP00000427279,9606.ENSP00000478570	EREG,IRAK2,IL1A,CXCL3,FOS,CXCL8,JUN,EDN1,CXCL2,VEGFA
GO:0007346	regulation of mitotic cell cycle	7	608	0.48	0.041	9606.ENSP00000239223,9606.ENSP00000244869,9606.ENSP00000263339,9606.ENSP00000270162,9606.ENSP00000360025,9606.ENSP00000368683,9606.ENSP00000403683	DUSP1,EREG,IL1A,SIK1,GADD45A,EDN1,NABP1
GO:0044093	positive regulation of molecular function	19	1713	0.47	0.00022	9606.ENSP00000200453,9606.ENSP00000239938,9606.ENSP00000244869,9606.ENSP00000252809,9606.ENSP00000256458,9606.ENSP00000265138,9606.ENSP00000279488,9606.ENSP00000307235,9606.ENSP00000356529,9606.ENSP00000356954,9606.ENSP00000360025,9606.ENSP00000360266,9606.ENSP00000366702,9606.ENSP00000368683,9606.ENSP00000368727,9606.ENSP00000398736,9606.ENSP00000409555,9606.ENSP00000448665,9606.ENSP00000478570	PPP1R15A,EGR1,EREG,GDF15,IRAK2,ARRDC3,DUSP6,EIF2AK3,RGS16,CTGF,GADD45A,JUN,ERRFI1,EDN1,XDH,CYR61,HERPUD1,DDIT3,VEGFA
GO:0051707	response to other organism	13	1173	0.47	0.0039	9606.ENSP00000239938,9606.ENSP00000256458,9606.ENSP00000296026,9606.ENSP00000306245,9606.ENSP00000306512,9606.ENSP00000307305,9606.ENSP00000356438,9606.ENSP00000360266,9606.ENSP00000360762,9606.ENSP00000368683,9606.ENSP00000427279,9606.ENSP00000469647,9606.ENSP00000473631	EGR1,IRAK2,CXCL3,FOS,CXCL8,DDIT4,PTGS2,JUN,ANKRD1,EDN1,CXCL2,ZFP36,DNAJC3
GO:0031324	negative regulation of cellular metabolic process	27	2463	0.46	4.97e-06	9606.ENSP00000200453,9606.ENSP00000230990,9606.ENSP00000239223,9606.ENSP00000239938,9606.ENSP00000244869,9606.ENSP00000264444,9606.ENSP00000270162,9606.ENSP00000279488,9606.ENSP00000288943,9606.ENSP00000307235,9606.ENSP00000307305,9606.ENSP00000326813,9606.ENSP00000344352,9606.ENSP00000344741,9606.ENSP00000356438,9606.ENSP00000360025,9606.ENSP00000360266,9606.ENSP00000360762,9606.ENSP00000366702,…	PPP1R15A,HBEGF,DUSP1,EGR1,EREG,MXD1,SIK1,DUSP6,DUSP2,EIF2AK3,DDIT4,YOD1,ATF3,INSIG1,PTGS2,GADD45A,JUN,ANKRD1,ERRFI1,EDN1,XDH,E2F6,HERPUD1,DDIT3,ZFP36,DNAJC3,VEGFA
GO:0051172	negative regulation of nitrogen compound metabolic process	25	2307	0.46	1.7e-05	9606.ENSP00000200453,9606.ENSP00000230990,9606.ENSP00000239223,9606.ENSP00000239938,9606.ENSP00000244869,9606.ENSP00000264444,9606.ENSP00000279488,9606.ENSP00000288943,9606.ENSP00000307235,9606.ENSP00000307305,9606.ENSP00000326813,9606.ENSP00000344352,9606.ENSP00000356438,9606.ENSP00000360025,9606.ENSP00000360266,9606.ENSP00000360762,9606.ENSP00000366702,9606.ENSP00000368683,9606.ENSP00000368727,…	PPP1R15A,HBEGF,DUSP1,EGR1,EREG,MXD1,DUSP6,DUSP2,EIF2AK3,DDIT4,YOD1,ATF3,PTGS2,GADD45A,JUN,ANKRD1,ERRFI1,EDN1,XDH,E2F6,HERPUD1,DDIT3,ZFP36,DNAJC3,VEGFA
GO:0051240	positive regulation of multicellular organismal process	17	1551	0.46	0.00068	9606.ENSP00000230990,9606.ENSP00000239938,9606.ENSP00000244869,9606.ENSP00000263339,9606.ENSP00000272233,9606.ENSP00000306245,9606.ENSP00000306512,9606.ENSP00000307235,9606.ENSP00000326737,9606.ENSP00000356438,9606.ENSP00000356954,9606.ENSP00000360266,9606.ENSP00000360762,9606.ENSP00000368683,9606.ENSP00000398736,9606.ENSP00000448665,9606.ENSP00000478570	HBEGF,EGR1,EREG,IL1A,RHOB,FOS,CXCL8,EIF2AK3,TNFRSF12A,PTGS2,CTGF,JUN,ANKRD1,EDN1,CYR61,DDIT3,VEGFA
GO:0048583	regulation of response to stimulus	41	3882	0.45	4.25e-09	9606.ENSP00000200453,9606.ENSP00000230990,9606.ENSP00000239223,9606.ENSP00000239938,9606.ENSP00000244869,9606.ENSP00000249356,9606.ENSP00000252809,9606.ENSP00000256458,9606.ENSP00000263339,9606.ENSP00000265138,9606.ENSP00000272233,9606.ENSP00000279488,9606.ENSP00000288943,9606.ENSP00000296026,9606.ENSP00000306245,9606.ENSP00000306512,9606.ENSP00000307235,9606.ENSP00000307305,9606.ENSP00000321026,…	PPP1R15A,HBEGF,DUSP1,EGR1,EREG,DNAJB9,GDF15,IRAK2,IL1A,ARRDC3,RHOB,DUSP6,DUSP2,CXCL3,FOS,CXCL8,EIF2AK3,DDIT4,LURAP1L,TNFRSF12A,YOD1,ATF3,INSIG1,PTGS2,RGS16,CTGF,GADD45A,JUN,ANKRD1,ERRFI1,EDN1,XDH,CYR61,HERPUD1,CDKN2AIP,CXCL2,MANF,FICD,DDIT3,DNAJC3,VEGFA
GO:0010605	negative regulation of macromolecule metabolic process	27	2558	0.45	9.39e-06	9606.ENSP00000200453,9606.ENSP00000230990,9606.ENSP00000239223,9606.ENSP00000239938,9606.ENSP00000244869,9606.ENSP00000264444,9606.ENSP00000279488,9606.ENSP00000288943,9606.ENSP00000307235,9606.ENSP00000307305,9606.ENSP00000326813,9606.ENSP00000344352,9606.ENSP00000356438,9606.ENSP00000356954,9606.ENSP00000360025,9606.ENSP00000360266,9606.ENSP00000360762,9606.ENSP00000366702,9606.ENSP00000368683,…	PPP1R15A,HBEGF,DUSP1,EGR1,EREG,MXD1,DUSP6,DUSP2,EIF2AK3,DDIT4,YOD1,ATF3,PTGS2,CTGF,GADD45A,JUN,ANKRD1,ERRFI1,EDN1,XDH,E2F6,HERPUD1,TIPARP,DDIT3,ZFP36,DNAJC3,VEGFA
GO:0009653	anatomical structure morphogenesis	21	1992	0.45	0.00017	9606.ENSP00000230990,9606.ENSP00000239223,9606.ENSP00000242480,9606.ENSP00000244869,9606.ENSP00000272233,9606.ENSP00000273153,9606.ENSP00000288943,9606.ENSP00000306512,9606.ENSP00000307235,9606.ENSP00000326737,9606.ENSP00000344741,9606.ENSP00000356438,9606.ENSP00000356954,9606.ENSP00000360266,9606.ENSP00000360762,9606.ENSP00000366702,9606.ENSP00000368683,9606.ENSP00000398736,9606.ENSP00000420612,…	HBEGF,DUSP1,EGR2,EREG,RHOB,CSRNP1,DUSP2,CXCL8,EIF2AK3,TNFRSF12A,INSIG1,PTGS2,CTGF,JUN,ANKRD1,ERRFI1,EDN1,CYR61,TIPARP,NR4A1,VEGFA
GO:2000026	regulation of multicellular organismal development	20	1876	0.45	0.00022	9606.ENSP00000239938,9606.ENSP00000263339,9606.ENSP00000272233,9606.ENSP00000273668,9606.ENSP00000279488,9606.ENSP00000306245,9606.ENSP00000306512,9606.ENSP00000307235,9606.ENSP00000326737,9606.ENSP00000356438,9606.ENSP00000356954,9606.ENSP00000360266,9606.ENSP00000360762,9606.ENSP00000366702,9606.ENSP00000368683,9606.ENSP00000368727,9606.ENSP00000398736,9606.ENSP00000448665,9606.ENSP00000469647,…	EGR1,IL1A,RHOB,EAF2,DUSP6,FOS,CXCL8,EIF2AK3,TNFRSF12A,PTGS2,CTGF,JUN,ANKRD1,ERRFI1,EDN1,XDH,CYR61,DDIT3,ZFP36,VEGFA
GO:0045595	regulation of cell differentiation	18	1695	0.45	0.0006	9606.ENSP00000244869,9606.ENSP00000252809,9606.ENSP00000270162,9606.ENSP00000279488,9606.ENSP00000306245,9606.ENSP00000326737,9606.ENSP00000344741,9606.ENSP00000356438,9606.ENSP00000356954,9606.ENSP00000360266,9606.ENSP00000360762,9606.ENSP00000366702,9606.ENSP00000368683,9606.ENSP00000368727,9606.ENSP00000398736,9606.ENSP00000448665,9606.ENSP00000469647,9606.ENSP00000478570	EREG,GDF15,SIK1,DUSP6,FOS,TNFRSF12A,INSIG1,PTGS2,CTGF,JUN,ANKRD1,ERRFI1,EDN1,XDH,CYR61,DDIT3,ZFP36,VEGFA
GO:0065009	regulation of molecular function	35	3322	0.44	1.37e-07	9606.ENSP00000200453,9606.ENSP00000230990,9606.ENSP00000239223,9606.ENSP00000239938,9606.ENSP00000244869,9606.ENSP00000252809,9606.ENSP00000256458,9606.ENSP00000263339,9606.ENSP00000265138,9606.ENSP00000270162,9606.ENSP00000279488,9606.ENSP00000288943,9606.ENSP00000296026,9606.ENSP00000306245,9606.ENSP00000306512,9606.ENSP00000307235,9606.ENSP00000350633,9606.ENSP00000356438,9606.ENSP00000356529,…	PPP1R15A,HBEGF,DUSP1,EGR1,EREG,GDF15,IRAK2,IL1A,ARRDC3,SIK1,DUSP6,DUSP2,CXCL3,FOS,CXCL8,EIF2AK3,SERTAD1,PTGS2,RGS16,CTGF,GADD45A,JUN,ERRFI1,EDN1,XDH,VCPKMT,CYR61,HERPUD1,CXCL2,MANF,FICD,DDIT3,ZFP36,DNAJC3,VEGFA
GO:0009892	negative regulation of metabolic process	29	2762	0.44	3.67e-06	9606.ENSP00000200453,9606.ENSP00000230990,9606.ENSP00000239223,9606.ENSP00000239938,9606.ENSP00000244869,9606.ENSP00000264444,9606.ENSP00000270162,9606.ENSP00000279488,9606.ENSP00000288943,9606.ENSP00000307235,9606.ENSP00000307305,9606.ENSP00000326813,9606.ENSP00000344352,9606.ENSP00000344741,9606.ENSP00000356438,9606.ENSP00000356954,9606.ENSP00000360025,9606.ENSP00000360266,9606.ENSP00000360762,…	PPP1R15A,HBEGF,DUSP1,EGR1,EREG,MXD1,SIK1,DUSP6,DUSP2,EIF2AK3,DDIT4,YOD1,ATF3,INSIG1,PTGS2,CTGF,GADD45A,JUN,ANKRD1,ERRFI1,EDN1,XDH,E2F6,HERPUD1,TIPARP,DDIT3,ZFP36,DNAJC3,VEGFA
GO:0050793	regulation of developmental process	25	2416	0.44	3.46e-05	9606.ENSP00000239938,9606.ENSP00000244869,9606.ENSP00000252809,9606.ENSP00000263339,9606.ENSP00000270162,9606.ENSP00000272233,9606.ENSP00000273668,9606.ENSP00000279488,9606.ENSP00000306245,9606.ENSP00000306512,9606.ENSP00000307235,9606.ENSP00000326737,9606.ENSP00000344741,9606.ENSP00000356438,9606.ENSP00000356954,9606.ENSP00000360266,9606.ENSP00000360762,9606.ENSP00000366702,9606.ENSP00000368683,…	EGR1,EREG,GDF15,IL1A,SIK1,RHOB,EAF2,DUSP6,FOS,CXCL8,EIF2AK3,TNFRSF12A,INSIG1,PTGS2,CTGF,JUN,ANKRD1,ERRFI1,EDN1,XDH,ZMYM5,CYR61,DDIT3,ZFP36,VEGFA
GO:0010558	negative regulation of macromolecule biosynthetic process	15	1425	0.44	0.0025	9606.ENSP00000230990,9606.ENSP00000239223,9606.ENSP00000239938,9606.ENSP00000244869,9606.ENSP00000264444,9606.ENSP00000307235,9606.ENSP00000344352,9606.ENSP00000360266,9606.ENSP00000360762,9606.ENSP00000366702,9606.ENSP00000368683,9606.ENSP00000370936,9606.ENSP00000448665,9606.ENSP00000469647,9606.ENSP00000478570	HBEGF,DUSP1,EGR1,EREG,MXD1,EIF2AK3,ATF3,JUN,ANKRD1,ERRFI1,EDN1,E2F6,DDIT3,ZFP36,VEGFA
GO:2000113	negative regulation of cellular macromolecule biosynthetic process	14	1348	0.44	0.0043	9606.ENSP00000230990,9606.ENSP00000239223,9606.ENSP00000239938,9606.ENSP00000244869,9606.ENSP00000264444,9606.ENSP00000307235,9606.ENSP00000344352,9606.ENSP00000360266,9606.ENSP00000360762,9606.ENSP00000368683,9606.ENSP00000370936,9606.ENSP00000448665,9606.ENSP00000469647,9606.ENSP00000478570	HBEGF,DUSP1,EGR1,EREG,MXD1,EIF2AK3,ATF3,JUN,ANKRD1,EDN1,E2F6,DDIT3,ZFP36,VEGFA
GO:0051336	regulation of hydrolase activity	13	1238	0.44	0.0058	9606.ENSP00000200453,9606.ENSP00000307235,9606.ENSP00000356438,9606.ENSP00000356529,9606.ENSP00000356954,9606.ENSP00000360266,9606.ENSP00000366702,9606.ENSP00000368727,9606.ENSP00000379201,9606.ENSP00000398736,9606.ENSP00000409555,9606.ENSP00000446479,9606.ENSP00000478570	PPP1R15A,EIF2AK3,PTGS2,RGS16,CTGF,JUN,ERRFI1,XDH,VCPKMT,CYR61,HERPUD1,FICD,VEGFA
GO:0040011	locomotion	12	1144	0.44	0.0088	9606.ENSP00000230990,9606.ENSP00000242480,9606.ENSP00000296026,9606.ENSP00000306512,9606.ENSP00000307305,9606.ENSP00000326737,9606.ENSP00000356954,9606.ENSP00000398736,9606.ENSP00000427279,9606.ENSP00000440864,9606.ENSP00000465617,9606.ENSP00000478570	HBEGF,EGR2,CXCL3,CXCL8,DDIT4,TNFRSF12A,CTGF,CYR61,CXCL2,NR4A1,IER2,VEGFA
GO:0060548	negative regulation of cell death	10	953	0.44	0.0192	9606.ENSP00000239223,9606.ENSP00000263339,9606.ENSP00000356438,9606.ENSP00000356954,9606.ENSP00000360266,9606.ENSP00000368683,9606.ENSP00000398736,9606.ENSP00000409555,9606.ENSP00000473631,9606.ENSP00000478570	DUSP1,IL1A,PTGS2,CTGF,JUN,EDN1,CYR61,HERPUD1,DNAJC3,VEGFA
GO:0043066	negative regulation of apoptotic process	9	859	0.44	0.028	9606.ENSP00000239223,9606.ENSP00000263339,9606.ENSP00000356438,9606.ENSP00000360266,9606.ENSP00000368683,9606.ENSP00000398736,9606.ENSP00000409555,9606.ENSP00000473631,9606.ENSP00000478570	DUSP1,IL1A,PTGS2,JUN,EDN1,CYR61,HERPUD1,DNAJC3,VEGFA
GO:0042221	response to chemical	41	4153	0.42	2.25e-08	9606.ENSP00000230990,9606.ENSP00000239223,9606.ENSP00000239938,9606.ENSP00000242480,9606.ENSP00000244869,9606.ENSP00000249356,9606.ENSP00000252809,9606.ENSP00000256458,9606.ENSP00000263339,9606.ENSP00000270162,9606.ENSP00000272233,9606.ENSP00000279488,9606.ENSP00000296026,9606.ENSP00000306245,9606.ENSP00000306512,9606.ENSP00000307235,9606.ENSP00000307305,9606.ENSP00000314619,9606.ENSP00000326737,…	HBEGF,DUSP1,EGR1,EGR2,EREG,DNAJB9,GDF15,IRAK2,IL1A,SIK1,RHOB,DUSP6,CXCL3,FOS,CXCL8,EIF2AK3,DDIT4,ZFAND2A,TNFRSF12A,YOD1,ATF3,INSIG1,PTGS2,CTGF,JUN,ANKRD1,SLC25A25,ERRFI1,EDN1,CYR61,HERPUD1,TIPARP,CXCL2,MANF,NR4A1,FICD,DDIT3,IER2,ZFP36,DNAJC3,VEGFA
GO:0006952	defense response	12	1234	0.41	0.015	9606.ENSP00000239938,9606.ENSP00000256458,9606.ENSP00000263339,9606.ENSP00000296026,9606.ENSP00000306245,9606.ENSP00000306512,9606.ENSP00000307305,9606.ENSP00000356438,9606.ENSP00000360266,9606.ENSP00000368683,9606.ENSP00000427279,9606.ENSP00000473631	EGR1,IRAK2,IL1A,CXCL3,FOS,CXCL8,DDIT4,PTGS2,JUN,EDN1,CXCL2,DNAJC3
GO:0006357	regulation of transcription by RNA polymerase II	25	2633	0.4	0.00013	9606.ENSP00000239938,9606.ENSP00000242480,9606.ENSP00000252809,9606.ENSP00000263339,9606.ENSP00000264444,9606.ENSP00000273153,9606.ENSP00000273668,9606.ENSP00000306245,9606.ENSP00000344352,9606.ENSP00000344741,9606.ENSP00000350633,9606.ENSP00000354543,9606.ENSP00000360266,9606.ENSP00000360762,9606.ENSP00000362563,9606.ENSP00000368683,9606.ENSP00000370936,9606.ENSP00000372361,9606.ENSP00000398736,…	EGR1,EGR2,GDF15,IL1A,MXD1,CSRNP1,EAF2,FOS,ATF3,INSIG1,SERTAD1,TSC22D2,JUN,ANKRD1,ZBTB43,EDN1,E2F6,ZMYM5,CYR61,KLF6,NR4A1,DDIT3,IER2,ZFP36,VEGFA
GO:0007166	cell surface receptor signaling pathway	21	2198	0.4	0.00057	9606.ENSP00000230990,9606.ENSP00000239938,9606.ENSP00000244869,9606.ENSP00000252809,9606.ENSP00000256458,9606.ENSP00000263339,9606.ENSP00000273153,9606.ENSP00000296026,9606.ENSP00000306245,9606.ENSP00000306512,9606.ENSP00000307235,9606.ENSP00000307305,9606.ENSP00000326737,9606.ENSP00000356438,9606.ENSP00000356954,9606.ENSP00000360266,9606.ENSP00000368683,9606.ENSP00000420612,9606.ENSP00000427279,…	HBEGF,EGR1,EREG,GDF15,IRAK2,IL1A,CSRNP1,CXCL3,FOS,CXCL8,EIF2AK3,DDIT4,TNFRSF12A,PTGS2,CTGF,JUN,EDN1,TIPARP,CXCL2,DDIT3,VEGFA
GO:0007049	cell cycle	12	1263	0.4	0.0172	9606.ENSP00000200453,9606.ENSP00000239223,9606.ENSP00000244869,9606.ENSP00000270162,9606.ENSP00000272233,9606.ENSP00000306512,9606.ENSP00000349547,9606.ENSP00000360025,9606.ENSP00000370936,9606.ENSP00000403683,9606.ENSP00000448665,9606.ENSP00000484532	PPP1R15A,DUSP1,EREG,SIK1,RHOB,CXCL8,RASSF1,GADD45A,E2F6,NABP1,DDIT3,MIS12
GO:0045892	negative regulation of transcription, DNA-templated	11	1169	0.4	0.0254	9606.ENSP00000239938,9606.ENSP00000244869,9606.ENSP00000264444,9606.ENSP00000344352,9606.ENSP00000360266,9606.ENSP00000360762,9606.ENSP00000368683,9606.ENSP00000370936,9606.ENSP00000448665,9606.ENSP00000469647,9606.ENSP00000478570	EGR1,EREG,MXD1,ATF3,JUN,ANKRD1,EDN1,E2F6,DDIT3,ZFP36,VEGFA
GO:0048522	positive regulation of cellular process	45	4898	0.39	1.38e-08	9606.ENSP00000200453,9606.ENSP00000230990,9606.ENSP00000239223,9606.ENSP00000239938,9606.ENSP00000242480,9606.ENSP00000244869,9606.ENSP00000252809,9606.ENSP00000256458,9606.ENSP00000263339,9606.ENSP00000265138,9606.ENSP00000270162,9606.ENSP00000272233,9606.ENSP00000273153,9606.ENSP00000273668,9606.ENSP00000279488,9606.ENSP00000296026,9606.ENSP00000306245,9606.ENSP00000306512,9606.ENSP00000307235,…	PPP1R15A,HBEGF,DUSP1,EGR1,EGR2,EREG,GDF15,IRAK2,IL1A,ARRDC3,SIK1,RHOB,CSRNP1,EAF2,DUSP6,CXCL3,FOS,CXCL8,EIF2AK3,DDIT4,ZFAND2A,LURAP1L,TNFRSF12A,ATF3,INSIG1,RASSF1,SERTAD1,PTGS2,CTGF,GADD45A,JUN,ANKRD1,EDN1,XDH,CYR61,HERPUD1,KLF6,CDKN2AIP,CXCL2,NR4A1,DDIT3,IER2,ZFP36,DNAJC3,VEGFA
GO:0048523	negative regulation of cellular process	41	4454	0.39	1.23e-07	9606.ENSP00000200453,9606.ENSP00000230990,9606.ENSP00000239223,9606.ENSP00000239938,9606.ENSP00000244869,9606.ENSP00000249356,9606.ENSP00000252809,9606.ENSP00000263339,9606.ENSP00000264444,9606.ENSP00000265138,9606.ENSP00000270162,9606.ENSP00000272233,9606.ENSP00000273668,9606.ENSP00000279488,9606.ENSP00000288943,9606.ENSP00000306512,9606.ENSP00000307235,9606.ENSP00000307305,9606.ENSP00000326813,…	PPP1R15A,HBEGF,DUSP1,EGR1,EREG,DNAJB9,GDF15,IL1A,MXD1,ARRDC3,SIK1,RHOB,EAF2,DUSP6,DUSP2,CXCL8,EIF2AK3,DDIT4,YOD1,ATF3,INSIG1,RASSF1,PTGS2,RGS16,CTGF,GADD45A,JUN,ANKRD1,ERRFI1,EDN1,XDH,E2F6,CYR61,NABP1,HERPUD1,CDKN2AIP,NR4A1,DDIT3,ZFP36,DNAJC3,VEGFA
GO:0048513	animal organ development	27	2926	0.39	8.38e-05	9606.ENSP00000230990,9606.ENSP00000239938,9606.ENSP00000242480,9606.ENSP00000244869,9606.ENSP00000249356,9606.ENSP00000265138,9606.ENSP00000270162,9606.ENSP00000273153,9606.ENSP00000306245,9606.ENSP00000306512,9606.ENSP00000307235,9606.ENSP00000307305,9606.ENSP00000344352,9606.ENSP00000344741,9606.ENSP00000356438,9606.ENSP00000356954,9606.ENSP00000360266,9606.ENSP00000360762,9606.ENSP00000362159,…	HBEGF,EGR1,EGR2,EREG,DNAJB9,ARRDC3,SIK1,CSRNP1,FOS,CXCL8,EIF2AK3,DDIT4,ATF3,INSIG1,PTGS2,CTGF,JUN,ANKRD1,SLC25A25,ERRFI1,GPCPD1,EDN1,XDH,CYR61,KLF6,TIPARP,VEGFA
GO:0010629	negative regulation of gene expression	15	1670	0.38	0.0097	9606.ENSP00000239938,9606.ENSP00000244869,9606.ENSP00000264444,9606.ENSP00000307235,9606.ENSP00000344352,9606.ENSP00000356954,9606.ENSP00000360266,9606.ENSP00000360762,9606.ENSP00000368683,9606.ENSP00000368727,9606.ENSP00000370936,9606.ENSP00000420612,9606.ENSP00000448665,9606.ENSP00000469647,9606.ENSP00000478570	EGR1,EREG,MXD1,EIF2AK3,ATF3,CTGF,JUN,ANKRD1,EDN1,XDH,E2F6,TIPARP,DDIT3,ZFP36,VEGFA
GO:0045934	negative regulation of nucleobase-containing compound metabolic process	13	1424	0.38	0.0165	9606.ENSP00000239223,9606.ENSP00000239938,9606.ENSP00000244869,9606.ENSP00000264444,9606.ENSP00000307305,9606.ENSP00000344352,9606.ENSP00000360266,9606.ENSP00000360762,9606.ENSP00000368683,9606.ENSP00000370936,9606.ENSP00000448665,9606.ENSP00000469647,9606.ENSP00000478570	DUSP1,EGR1,EREG,MXD1,DDIT4,ATF3,JUN,ANKRD1,EDN1,E2F6,DDIT3,ZFP36,VEGFA
GO:0051241	negative regulation of multicellular organismal process	10	1098	0.38	0.0411	9606.ENSP00000252809,9606.ENSP00000265138,9606.ENSP00000273668,9606.ENSP00000307235,9606.ENSP00000356438,9606.ENSP00000366702,9606.ENSP00000368683,9606.ENSP00000368727,9606.ENSP00000448665,9606.ENSP00000469647	GDF15,ARRDC3,EAF2,EIF2AK3,PTGS2,ERRFI1,EDN1,XDH,DDIT3,ZFP36
GO:0048519	negative regulation of biological process	44	4953	0.37	6.08e-08	9606.ENSP00000200453,9606.ENSP00000230990,9606.ENSP00000239223,9606.ENSP00000239938,9606.ENSP00000244869,9606.ENSP00000249356,9606.ENSP00000252809,9606.ENSP00000256458,9606.ENSP00000263339,9606.ENSP00000264444,9606.ENSP00000265138,9606.ENSP00000270162,9606.ENSP00000272233,9606.ENSP00000273668,9606.ENSP00000279488,9606.ENSP00000288943,9606.ENSP00000306512,9606.ENSP00000307235,9606.ENSP00000307305,…	PPP1R15A,HBEGF,DUSP1,EGR1,EREG,DNAJB9,GDF15,IRAK2,IL1A,MXD1,ARRDC3,SIK1,RHOB,EAF2,DUSP6,DUSP2,CXCL8,EIF2AK3,DDIT4,YOD1,ATF3,INSIG1,RASSF1,PTGS2,RGS16,CTGF,GADD45A,JUN,ANKRD1,ERRFI1,EDN1,XDH,E2F6,CYR61,NABP1,HERPUD1,TIPARP,CDKN2AIP,NR4A1,FICD,DDIT3,ZFP36,DNAJC3,VEGFA
GO:0051239	regulation of multicellular organismal process	25	2788	0.37	0.00027	9606.ENSP00000230990,9606.ENSP00000239938,9606.ENSP00000242480,9606.ENSP00000244869,9606.ENSP00000252809,9606.ENSP00000263339,9606.ENSP00000265138,9606.ENSP00000272233,9606.ENSP00000273668,9606.ENSP00000279488,9606.ENSP00000306245,9606.ENSP00000306512,9606.ENSP00000307235,9606.ENSP00000326737,9606.ENSP00000356438,9606.ENSP00000356954,9606.ENSP00000360266,9606.ENSP00000360762,9606.ENSP00000366702,…	HBEGF,EGR1,EGR2,EREG,GDF15,IL1A,ARRDC3,RHOB,EAF2,DUSP6,FOS,CXCL8,EIF2AK3,TNFRSF12A,PTGS2,CTGF,JUN,ANKRD1,ERRFI1,EDN1,XDH,CYR61,DDIT3,ZFP36,VEGFA
GO:0006928	movement of cell or subcellular component	12	1355	0.37	0.0267	9606.ENSP00000230990,9606.ENSP00000242480,9606.ENSP00000296026,9606.ENSP00000306512,9606.ENSP00000307305,9606.ENSP00000326737,9606.ENSP00000356954,9606.ENSP00000398736,9606.ENSP00000427279,9606.ENSP00000440864,9606.ENSP00000465617,9606.ENSP00000478570	HBEGF,EGR2,CXCL3,CXCL8,DDIT4,TNFRSF12A,CTGF,CYR61,CXCL2,NR4A1,IER2,VEGFA
GO:0051130	positive regulation of cellular component organization	10	1128	0.37	0.0477	9606.ENSP00000200453,9606.ENSP00000244869,9606.ENSP00000252809,9606.ENSP00000263339,9606.ENSP00000326737,9606.ENSP00000356954,9606.ENSP00000360266,9606.ENSP00000360762,9606.ENSP00000368683,9606.ENSP00000478570	PPP1R15A,EREG,GDF15,IL1A,TNFRSF12A,CTGF,JUN,ANKRD1,EDN1,VEGFA
GO:0048518	positive regulation of biological process	46	5459	0.35	8.54e-08	9606.ENSP00000200453,9606.ENSP00000230990,9606.ENSP00000239223,9606.ENSP00000239938,9606.ENSP00000242480,9606.ENSP00000244869,9606.ENSP00000252809,9606.ENSP00000256458,9606.ENSP00000263339,9606.ENSP00000265138,9606.ENSP00000270162,9606.ENSP00000272233,9606.ENSP00000273153,9606.ENSP00000273668,9606.ENSP00000279488,9606.ENSP00000296026,9606.ENSP00000306245,9606.ENSP00000306512,9606.ENSP00000307235,…	PPP1R15A,HBEGF,DUSP1,EGR1,EGR2,EREG,GDF15,IRAK2,IL1A,ARRDC3,SIK1,RHOB,CSRNP1,EAF2,DUSP6,CXCL3,FOS,CXCL8,EIF2AK3,DDIT4,ZFAND2A,LURAP1L,TNFRSF12A,ATF3,INSIG1,RASSF1,SERTAD1,PTGS2,CTGF,GADD45A,JUN,ANKRD1,EDN1,XDH,CYR61,HERPUD1,KLF6,TIPARP,CDKN2AIP,CXCL2,NR4A1,DDIT3,IER2,ZFP36,DNAJC3,VEGFA
GO:0009889	regulation of biosynthetic process	37	4337	0.35	4.97e-06	9606.ENSP00000200453,9606.ENSP00000230990,9606.ENSP00000239223,9606.ENSP00000239938,9606.ENSP00000242480,9606.ENSP00000244869,9606.ENSP00000252809,9606.ENSP00000256458,9606.ENSP00000263339,9606.ENSP00000264444,9606.ENSP00000270162,9606.ENSP00000273153,9606.ENSP00000273668,9606.ENSP00000306245,9606.ENSP00000307235,9606.ENSP00000307305,9606.ENSP00000344352,9606.ENSP00000344741,9606.ENSP00000350633,…	PPP1R15A,HBEGF,DUSP1,EGR1,EGR2,EREG,GDF15,IRAK2,IL1A,MXD1,SIK1,CSRNP1,EAF2,FOS,EIF2AK3,DDIT4,ATF3,INSIG1,SERTAD1,TSC22D2,PTGS2,CTGF,JUN,ANKRD1,ZBTB43,ERRFI1,EDN1,E2F6,ZMYM5,CYR61,KLF6,NR4A1,DDIT3,IER2,ZFP36,DNAJC3,VEGFA
GO:0031326	regulation of cellular biosynthetic process	36	4266	0.35	9.74e-06	9606.ENSP00000200453,9606.ENSP00000230990,9606.ENSP00000239223,9606.ENSP00000239938,9606.ENSP00000242480,9606.ENSP00000244869,9606.ENSP00000252809,9606.ENSP00000256458,9606.ENSP00000263339,9606.ENSP00000264444,9606.ENSP00000270162,9606.ENSP00000273153,9606.ENSP00000273668,9606.ENSP00000306245,9606.ENSP00000307235,9606.ENSP00000307305,9606.ENSP00000344352,9606.ENSP00000344741,9606.ENSP00000350633,…	PPP1R15A,HBEGF,DUSP1,EGR1,EGR2,EREG,GDF15,IRAK2,IL1A,MXD1,SIK1,CSRNP1,EAF2,FOS,EIF2AK3,DDIT4,ATF3,INSIG1,SERTAD1,TSC22D2,PTGS2,JUN,ANKRD1,ZBTB43,ERRFI1,EDN1,E2F6,ZMYM5,CYR61,KLF6,NR4A1,DDIT3,IER2,ZFP36,DNAJC3,VEGFA
GO:0007275	multicellular organism development	39	4726	0.34	4.24e-06	9606.ENSP00000230990,9606.ENSP00000239223,9606.ENSP00000239938,9606.ENSP00000242480,9606.ENSP00000244869,9606.ENSP00000249356,9606.ENSP00000264444,9606.ENSP00000265138,9606.ENSP00000270162,9606.ENSP00000272233,9606.ENSP00000273153,9606.ENSP00000279488,9606.ENSP00000280551,9606.ENSP00000288943,9606.ENSP00000306245,9606.ENSP00000306512,9606.ENSP00000307235,9606.ENSP00000307305,9606.ENSP00000326737,…	HBEGF,DUSP1,EGR1,EGR2,EREG,DNAJB9,MXD1,ARRDC3,SIK1,RHOB,CSRNP1,DUSP6,SEC24D,DUSP2,FOS,CXCL8,EIF2AK3,DDIT4,TNFRSF12A,ATF3,INSIG1,PTGS2,CTGF,JUN,ANKRD1,SLC25A25,ERRFI1,GPCPD1,EDN1,XDH,ZMYM5,CYR61,KLF6,TIPARP,MANF,NR4A1,DDIT3,IER2,VEGFA
GO:0010556	regulation of macromolecule biosynthetic process	34	4143	0.34	3.91e-05	9606.ENSP00000200453,9606.ENSP00000230990,9606.ENSP00000239223,9606.ENSP00000239938,9606.ENSP00000242480,9606.ENSP00000244869,9606.ENSP00000252809,9606.ENSP00000256458,9606.ENSP00000263339,9606.ENSP00000264444,9606.ENSP00000270162,9606.ENSP00000273153,9606.ENSP00000273668,9606.ENSP00000306245,9606.ENSP00000307235,9606.ENSP00000344352,9606.ENSP00000344741,9606.ENSP00000350633,9606.ENSP00000354543,…	PPP1R15A,HBEGF,DUSP1,EGR1,EGR2,EREG,GDF15,IRAK2,IL1A,MXD1,SIK1,CSRNP1,EAF2,FOS,EIF2AK3,ATF3,INSIG1,SERTAD1,TSC22D2,JUN,ANKRD1,ZBTB43,ERRFI1,EDN1,E2F6,ZMYM5,CYR61,KLF6,NR4A1,DDIT3,IER2,ZFP36,DNAJC3,VEGFA
GO:0051171	regulation of nitrogen compound metabolic process	47	5827	0.33	1.65e-07	9606.ENSP00000200453,9606.ENSP00000230990,9606.ENSP00000239223,9606.ENSP00000239938,9606.ENSP00000242480,9606.ENSP00000244869,9606.ENSP00000252809,9606.ENSP00000256458,9606.ENSP00000263339,9606.ENSP00000264444,9606.ENSP00000265138,9606.ENSP00000270162,9606.ENSP00000273153,9606.ENSP00000273668,9606.ENSP00000279488,9606.ENSP00000288943,9606.ENSP00000306245,9606.ENSP00000307235,9606.ENSP00000307305,…	PPP1R15A,HBEGF,DUSP1,EGR1,EGR2,EREG,GDF15,IRAK2,IL1A,MXD1,ARRDC3,SIK1,CSRNP1,EAF2,DUSP6,DUSP2,FOS,EIF2AK3,DDIT4,ZFAND2A,YOD1,ATF3,INSIG1,RASSF1,SERTAD1,TSC22D2,PTGS2,CTGF,GADD45A,JUN,ANKRD1,ZBTB43,ERRFI1,EDN1,XDH,E2F6,ZMYM5,CYR61,HERPUD1,KLF6,TIPARP,NR4A1,DDIT3,IER2,ZFP36,DNAJC3,VEGFA
GO:0048856	anatomical structure development	41	5085	0.33	2.99e-06	9606.ENSP00000230990,9606.ENSP00000239223,9606.ENSP00000239938,9606.ENSP00000242480,9606.ENSP00000244869,9606.ENSP00000249356,9606.ENSP00000252809,9606.ENSP00000263339,9606.ENSP00000264444,9606.ENSP00000265138,9606.ENSP00000270162,9606.ENSP00000272233,9606.ENSP00000273153,9606.ENSP00000279488,9606.ENSP00000280551,9606.ENSP00000288943,9606.ENSP00000306245,9606.ENSP00000306512,9606.ENSP00000307235,…	HBEGF,DUSP1,EGR1,EGR2,EREG,DNAJB9,GDF15,IL1A,MXD1,ARRDC3,SIK1,RHOB,CSRNP1,DUSP6,SEC24D,DUSP2,FOS,CXCL8,EIF2AK3,DDIT4,TNFRSF12A,ATF3,INSIG1,PTGS2,CTGF,JUN,ANKRD1,SLC25A25,ERRFI1,GPCPD1,EDN1,XDH,ZMYM5,CYR61,KLF6,TIPARP,MANF,NR4A1,DDIT3,IER2,VEGFA
GO:0007165	signal transduction	38	4738	0.33	1.26e-05	9606.ENSP00000200453,9606.ENSP00000230990,9606.ENSP00000239223,9606.ENSP00000239938,9606.ENSP00000244869,9606.ENSP00000249356,9606.ENSP00000252809,9606.ENSP00000256458,9606.ENSP00000263339,9606.ENSP00000270162,9606.ENSP00000272233,9606.ENSP00000273153,9606.ENSP00000279488,9606.ENSP00000296026,9606.ENSP00000306245,9606.ENSP00000306512,9606.ENSP00000307235,9606.ENSP00000307305,9606.ENSP00000326737,…	PPP1R15A,HBEGF,DUSP1,EGR1,EREG,DNAJB9,GDF15,IRAK2,IL1A,SIK1,RHOB,CSRNP1,DUSP6,CXCL3,FOS,CXCL8,EIF2AK3,DDIT4,TNFRSF12A,YOD1,ATF3,INSIG1,RASSF1,PTGS2,RGS16,CTGF,GADD45A,JUN,RND3,EDN1,HERPUD1,TIPARP,CXCL2,NR4A1,DDIT3,ZFP36,DNAJC3,VEGFA
GO:2000112	regulation of cellular macromolecule biosynthetic process	33	4050	0.33	6.67e-05	9606.ENSP00000200453,9606.ENSP00000230990,9606.ENSP00000239223,9606.ENSP00000239938,9606.ENSP00000242480,9606.ENSP00000244869,9606.ENSP00000252809,9606.ENSP00000256458,9606.ENSP00000263339,9606.ENSP00000264444,9606.ENSP00000270162,9606.ENSP00000273153,9606.ENSP00000273668,9606.ENSP00000306245,9606.ENSP00000307235,9606.ENSP00000344352,9606.ENSP00000344741,9606.ENSP00000350633,9606.ENSP00000354543,…	PPP1R15A,HBEGF,DUSP1,EGR1,EGR2,EREG,GDF15,IRAK2,IL1A,MXD1,SIK1,CSRNP1,EAF2,FOS,EIF2AK3,ATF3,INSIG1,SERTAD1,TSC22D2,JUN,ANKRD1,ZBTB43,EDN1,E2F6,ZMYM5,CYR61,KLF6,NR4A1,DDIT3,IER2,ZFP36,DNAJC3,VEGFA
GO:0080090	regulation of primary metabolic process	47	5982	0.32	3.32e-07	9606.ENSP00000200453,9606.ENSP00000230990,9606.ENSP00000239223,9606.ENSP00000239938,9606.ENSP00000242480,9606.ENSP00000244869,9606.ENSP00000252809,9606.ENSP00000256458,9606.ENSP00000263339,9606.ENSP00000264444,9606.ENSP00000265138,9606.ENSP00000270162,9606.ENSP00000273153,9606.ENSP00000273668,9606.ENSP00000279488,9606.ENSP00000288943,9606.ENSP00000306245,9606.ENSP00000307235,9606.ENSP00000307305,…	PPP1R15A,HBEGF,DUSP1,EGR1,EGR2,EREG,GDF15,IRAK2,IL1A,MXD1,ARRDC3,SIK1,CSRNP1,EAF2,DUSP6,DUSP2,FOS,EIF2AK3,DDIT4,ZFAND2A,YOD1,ATF3,INSIG1,RASSF1,SERTAD1,TSC22D2,PTGS2,CTGF,GADD45A,JUN,ANKRD1,ZBTB43,ERRFI1,EDN1,XDH,E2F6,ZMYM5,CYR61,HERPUD1,KLF6,TIPARP,NR4A1,DDIT3,IER2,ZFP36,DNAJC3,VEGFA
GO:0048731	system development	33	4144	0.32	0.0001	9606.ENSP00000230990,9606.ENSP00000239938,9606.ENSP00000242480,9606.ENSP00000244869,9606.ENSP00000249356,9606.ENSP00000265138,9606.ENSP00000270162,9606.ENSP00000272233,9606.ENSP00000273153,9606.ENSP00000306245,9606.ENSP00000306512,9606.ENSP00000307235,9606.ENSP00000307305,9606.ENSP00000326737,9606.ENSP00000344352,9606.ENSP00000344741,9606.ENSP00000356438,9606.ENSP00000356954,9606.ENSP00000360266,…	HBEGF,EGR1,EGR2,EREG,DNAJB9,ARRDC3,SIK1,RHOB,CSRNP1,FOS,CXCL8,EIF2AK3,DDIT4,TNFRSF12A,ATF3,INSIG1,PTGS2,CTGF,JUN,ANKRD1,SLC25A25,ERRFI1,GPCPD1,EDN1,XDH,CYR61,KLF6,TIPARP,MANF,NR4A1,DDIT3,IER2,VEGFA
GO:0006355	regulation of transcription, DNA-templated	29	3661	0.32	0.00044	9606.ENSP00000239938,9606.ENSP00000242480,9606.ENSP00000244869,9606.ENSP00000252809,9606.ENSP00000256458,9606.ENSP00000263339,9606.ENSP00000264444,9606.ENSP00000270162,9606.ENSP00000273153,9606.ENSP00000273668,9606.ENSP00000306245,9606.ENSP00000307235,9606.ENSP00000344352,9606.ENSP00000344741,9606.ENSP00000350633,9606.ENSP00000354543,9606.ENSP00000360266,9606.ENSP00000360762,9606.ENSP00000362563,…	EGR1,EGR2,EREG,GDF15,IRAK2,IL1A,MXD1,SIK1,CSRNP1,EAF2,FOS,EIF2AK3,ATF3,INSIG1,SERTAD1,TSC22D2,JUN,ANKRD1,ZBTB43,EDN1,E2F6,ZMYM5,CYR61,KLF6,NR4A1,DDIT3,IER2,ZFP36,VEGFA
GO:0032879	regulation of localization	20	2524	0.32	0.0069	9606.ENSP00000230990,9606.ENSP00000244869,9606.ENSP00000263339,9606.ENSP00000270162,9606.ENSP00000272233,9606.ENSP00000296026,9606.ENSP00000306512,9606.ENSP00000307235,9606.ENSP00000326813,9606.ENSP00000344741,9606.ENSP00000356438,9606.ENSP00000358233,9606.ENSP00000360266,9606.ENSP00000360762,9606.ENSP00000368683,9606.ENSP00000398736,9606.ENSP00000427279,9606.ENSP00000448665,9606.ENSP00000469647,…	HBEGF,EREG,IL1A,SIK1,RHOB,CXCL3,CXCL8,EIF2AK3,YOD1,INSIG1,PTGS2,GPR89B,JUN,ANKRD1,EDN1,CYR61,CXCL2,DDIT3,ZFP36,VEGFA
GO:0060255	regulation of macromolecule metabolic process	47	6072	0.31	5.04e-07	9606.ENSP00000200453,9606.ENSP00000230990,9606.ENSP00000239223,9606.ENSP00000239938,9606.ENSP00000242480,9606.ENSP00000244869,9606.ENSP00000252809,9606.ENSP00000256458,9606.ENSP00000263339,9606.ENSP00000264444,9606.ENSP00000265138,9606.ENSP00000270162,9606.ENSP00000273153,9606.ENSP00000273668,9606.ENSP00000279488,9606.ENSP00000288943,9606.ENSP00000306245,9606.ENSP00000307235,9606.ENSP00000307305,…	PPP1R15A,HBEGF,DUSP1,EGR1,EGR2,EREG,GDF15,IRAK2,IL1A,MXD1,ARRDC3,SIK1,CSRNP1,EAF2,DUSP6,DUSP2,FOS,EIF2AK3,DDIT4,ZFAND2A,YOD1,ATF3,INSIG1,RASSF1,SERTAD1,TSC22D2,PTGS2,CTGF,GADD45A,JUN,ANKRD1,ZBTB43,ERRFI1,EDN1,XDH,E2F6,ZMYM5,CYR61,HERPUD1,KLF6,TIPARP,NR4A1,DDIT3,IER2,ZFP36,DNAJC3,VEGFA
GO:0023052	signaling	39	5108	0.31	2.61e-05	9606.ENSP00000200453,9606.ENSP00000230990,9606.ENSP00000239223,9606.ENSP00000239938,9606.ENSP00000244869,9606.ENSP00000249356,9606.ENSP00000252809,9606.ENSP00000256458,9606.ENSP00000263339,9606.ENSP00000270162,9606.ENSP00000272233,9606.ENSP00000273153,9606.ENSP00000279488,9606.ENSP00000296026,9606.ENSP00000306245,9606.ENSP00000306512,9606.ENSP00000307235,9606.ENSP00000307305,9606.ENSP00000326737,…	PPP1R15A,HBEGF,DUSP1,EGR1,EREG,DNAJB9,GDF15,IRAK2,IL1A,SIK1,RHOB,CSRNP1,DUSP6,CXCL3,FOS,CXCL8,EIF2AK3,DDIT4,TNFRSF12A,YOD1,ATF3,INSIG1,RASSF1,PTGS2,RGS16,CTGF,GADD45A,JUN,RND3,EDN1,CYR61,HERPUD1,TIPARP,CXCL2,NR4A1,DDIT3,ZFP36,DNAJC3,VEGFA
GO:0051128	regulation of cellular component organization	18	2306	0.31	0.014	9606.ENSP00000200453,9606.ENSP00000230990,9606.ENSP00000239223,9606.ENSP00000244869,9606.ENSP00000252809,9606.ENSP00000263339,9606.ENSP00000273668,9606.ENSP00000326737,9606.ENSP00000344741,9606.ENSP00000349547,9606.ENSP00000356954,9606.ENSP00000360266,9606.ENSP00000360762,9606.ENSP00000368683,9606.ENSP00000372361,9606.ENSP00000398736,9606.ENSP00000427108,9606.ENSP00000478570	PPP1R15A,HBEGF,DUSP1,EREG,GDF15,IL1A,EAF2,TNFRSF12A,INSIG1,RASSF1,CTGF,JUN,ANKRD1,EDN1,ZMYM5,CYR61,CDKN2AIP,VEGFA
GO:0031323	regulation of cellular metabolic process	46	6082	0.3	1.54e-06	9606.ENSP00000200453,9606.ENSP00000230990,9606.ENSP00000239223,9606.ENSP00000239938,9606.ENSP00000242480,9606.ENSP00000244869,9606.ENSP00000252809,9606.ENSP00000256458,9606.ENSP00000263339,9606.ENSP00000264444,9606.ENSP00000265138,9606.ENSP00000270162,9606.ENSP00000273153,9606.ENSP00000273668,9606.ENSP00000279488,9606.ENSP00000288943,9606.ENSP00000306245,9606.ENSP00000307235,9606.ENSP00000307305,…	PPP1R15A,HBEGF,DUSP1,EGR1,EGR2,EREG,GDF15,IRAK2,IL1A,MXD1,ARRDC3,SIK1,CSRNP1,EAF2,DUSP6,DUSP2,FOS,EIF2AK3,DDIT4,ZFAND2A,YOD1,ATF3,INSIG1,RASSF1,SERTAD1,TSC22D2,PTGS2,CTGF,GADD45A,JUN,ANKRD1,ZBTB43,ERRFI1,EDN1,XDH,E2F6,ZMYM5,CYR61,HERPUD1,KLF6,NR4A1,DDIT3,IER2,ZFP36,DNAJC3,VEGFA
GO:0007154	cell communication	39	5219	0.3	4.05e-05	9606.ENSP00000200453,9606.ENSP00000230990,9606.ENSP00000239223,9606.ENSP00000239938,9606.ENSP00000244869,9606.ENSP00000249356,9606.ENSP00000252809,9606.ENSP00000256458,9606.ENSP00000263339,9606.ENSP00000270162,9606.ENSP00000272233,9606.ENSP00000273153,9606.ENSP00000279488,9606.ENSP00000296026,9606.ENSP00000306245,9606.ENSP00000306512,9606.ENSP00000307235,9606.ENSP00000307305,9606.ENSP00000326737,…	PPP1R15A,HBEGF,DUSP1,EGR1,EREG,DNAJB9,GDF15,IRAK2,IL1A,SIK1,RHOB,CSRNP1,DUSP6,CXCL3,FOS,CXCL8,EIF2AK3,DDIT4,TNFRSF12A,YOD1,ATF3,INSIG1,RASSF1,PTGS2,RGS16,CTGF,GADD45A,JUN,RND3,EDN1,CYR61,HERPUD1,TIPARP,CXCL2,NR4A1,DDIT3,ZFP36,DNAJC3,VEGFA
GO:0010468	regulation of gene expression	34	4533	0.3	0.00021	9606.ENSP00000200453,9606.ENSP00000239938,9606.ENSP00000242480,9606.ENSP00000244869,9606.ENSP00000252809,9606.ENSP00000256458,9606.ENSP00000263339,9606.ENSP00000264444,9606.ENSP00000270162,9606.ENSP00000273153,9606.ENSP00000273668,9606.ENSP00000306245,9606.ENSP00000307235,9606.ENSP00000344352,9606.ENSP00000344741,9606.ENSP00000350633,9606.ENSP00000354543,9606.ENSP00000356954,9606.ENSP00000360266,…	PPP1R15A,EGR1,EGR2,EREG,GDF15,IRAK2,IL1A,MXD1,SIK1,CSRNP1,EAF2,FOS,EIF2AK3,ATF3,INSIG1,SERTAD1,TSC22D2,CTGF,JUN,ANKRD1,ZBTB43,EDN1,XDH,E2F6,ZMYM5,CYR61,KLF6,TIPARP,NR4A1,DDIT3,IER2,ZFP36,DNAJC3,VEGFA
GO:0019219	regulation of nucleobase-containing compound metabolic process	31	4133	0.3	0.00057	9606.ENSP00000239223,9606.ENSP00000239938,9606.ENSP00000242480,9606.ENSP00000244869,9606.ENSP00000252809,9606.ENSP00000256458,9606.ENSP00000263339,9606.ENSP00000264444,9606.ENSP00000270162,9606.ENSP00000273153,9606.ENSP00000273668,9606.ENSP00000306245,9606.ENSP00000307235,9606.ENSP00000307305,9606.ENSP00000344352,9606.ENSP00000344741,9606.ENSP00000350633,9606.ENSP00000354543,9606.ENSP00000360266,…	DUSP1,EGR1,EGR2,EREG,GDF15,IRAK2,IL1A,MXD1,SIK1,CSRNP1,EAF2,FOS,EIF2AK3,DDIT4,ATF3,INSIG1,SERTAD1,TSC22D2,JUN,ANKRD1,ZBTB43,EDN1,E2F6,ZMYM5,CYR61,KLF6,NR4A1,DDIT3,IER2,ZFP36,VEGFA
GO:0030154	cell differentiation	26	3457	0.3	0.0025	9606.ENSP00000239938,9606.ENSP00000242480,9606.ENSP00000244869,9606.ENSP00000249356,9606.ENSP00000252809,9606.ENSP00000263339,9606.ENSP00000270162,9606.ENSP00000272233,9606.ENSP00000279488,9606.ENSP00000306245,9606.ENSP00000307235,9606.ENSP00000307305,9606.ENSP00000326737,9606.ENSP00000344352,9606.ENSP00000356438,9606.ENSP00000356954,9606.ENSP00000360266,9606.ENSP00000360762,9606.ENSP00000368683,…	EGR1,EGR2,EREG,DNAJB9,GDF15,IL1A,SIK1,RHOB,DUSP6,FOS,EIF2AK3,DDIT4,TNFRSF12A,ATF3,PTGS2,CTGF,JUN,ANKRD1,EDN1,CYR61,KLF6,TIPARP,MANF,NR4A1,IER2,VEGFA
GO:0006351	transcription, DNA-templated	19	2569	0.29	0.0174	9606.ENSP00000239938,9606.ENSP00000242480,9606.ENSP00000244869,9606.ENSP00000264444,9606.ENSP00000273153,9606.ENSP00000273668,9606.ENSP00000306245,9606.ENSP00000344352,9606.ENSP00000350633,9606.ENSP00000356954,9606.ENSP00000360266,9606.ENSP00000362563,9606.ENSP00000370936,9606.ENSP00000372361,9606.ENSP00000403683,9606.ENSP00000419923,9606.ENSP00000440864,9606.ENSP00000448665,9606.ENSP00000465617	EGR1,EGR2,EREG,MXD1,CSRNP1,EAF2,FOS,ATF3,SERTAD1,CTGF,JUN,ZBTB43,E2F6,ZMYM5,NABP1,KLF6,NR4A1,DDIT3,IER2
GO:0051716	cellular response to stimulus	45	6212	0.28	8.21e-06	9606.ENSP00000200453,9606.ENSP00000230990,9606.ENSP00000239223,9606.ENSP00000239938,9606.ENSP00000242480,9606.ENSP00000244869,9606.ENSP00000249356,9606.ENSP00000252809,9606.ENSP00000256458,9606.ENSP00000263339,9606.ENSP00000270162,9606.ENSP00000272233,9606.ENSP00000273153,9606.ENSP00000279488,9606.ENSP00000296026,9606.ENSP00000306245,9606.ENSP00000306512,9606.ENSP00000307235,9606.ENSP00000307305,…	PPP1R15A,HBEGF,DUSP1,EGR1,EGR2,EREG,DNAJB9,GDF15,IRAK2,IL1A,SIK1,RHOB,CSRNP1,DUSP6,CXCL3,FOS,CXCL8,EIF2AK3,DDIT4,ZFAND2A,TNFRSF12A,YOD1,ATF3,INSIG1,RASSF1,PTGS2,RGS16,CTGF,GADD45A,JUN,ANKRD1,RND3,ERRFI1,EDN1,NABP1,HERPUD1,TIPARP,CDKN2AIP,CXCL2,NR4A1,FICD,DDIT3,ZFP36,DNAJC3,VEGFA
GO:1901362	organic cyclic compound biosynthetic process	22	3230	0.26	0.0201	9606.ENSP00000239938,9606.ENSP00000242480,9606.ENSP00000244869,9606.ENSP00000264444,9606.ENSP00000273153,9606.ENSP00000273668,9606.ENSP00000306245,9606.ENSP00000344352,9606.ENSP00000344741,9606.ENSP00000350633,9606.ENSP00000356438,9606.ENSP00000356954,9606.ENSP00000360266,9606.ENSP00000362563,9606.ENSP00000368727,9606.ENSP00000370936,9606.ENSP00000372361,9606.ENSP00000403683,9606.ENSP00000419923,…	EGR1,EGR2,EREG,MXD1,CSRNP1,EAF2,FOS,ATF3,INSIG1,SERTAD1,PTGS2,CTGF,JUN,ZBTB43,XDH,E2F6,ZMYM5,NABP1,KLF6,NR4A1,DDIT3,IER2
GO:0034654	nucleobase-containing compound biosynthetic process	21	3031	0.26	0.0208	9606.ENSP00000239938,9606.ENSP00000242480,9606.ENSP00000244869,9606.ENSP00000264444,9606.ENSP00000273153,9606.ENSP00000273668,9606.ENSP00000306245,9606.ENSP00000344352,9606.ENSP00000350633,9606.ENSP00000356438,9606.ENSP00000356954,9606.ENSP00000360266,9606.ENSP00000362563,9606.ENSP00000368727,9606.ENSP00000370936,9606.ENSP00000372361,9606.ENSP00000403683,9606.ENSP00000419923,9606.ENSP00000440864,…	EGR1,EGR2,EREG,MXD1,CSRNP1,EAF2,FOS,ATF3,SERTAD1,PTGS2,CTGF,JUN,ZBTB43,XDH,E2F6,ZMYM5,NABP1,KLF6,NR4A1,DDIT3,IER2
GO:0050896	response to stimulus	50	7824	0.23	3.49e-05	9606.ENSP00000200453,9606.ENSP00000230990,9606.ENSP00000239223,9606.ENSP00000239938,9606.ENSP00000242480,9606.ENSP00000244869,9606.ENSP00000249356,9606.ENSP00000252809,9606.ENSP00000256458,9606.ENSP00000263339,9606.ENSP00000270162,9606.ENSP00000272233,9606.ENSP00000273153,9606.ENSP00000279488,9606.ENSP00000296026,9606.ENSP00000306245,9606.ENSP00000306512,9606.ENSP00000307235,9606.ENSP00000307305,…	PPP1R15A,HBEGF,DUSP1,EGR1,EGR2,EREG,DNAJB9,GDF15,IRAK2,IL1A,SIK1,RHOB,CSRNP1,DUSP6,CXCL3,FOS,CXCL8,EIF2AK3,DDIT4,ZFAND2A,TNFRSF12A,YOD1,ATF3,INSIG1,RASSF1,TSC22D2,PTGS2,RGS16,CTGF,GADD45A,JUN,ANKRD1,SLC25A25,RND3,ERRFI1,EDN1,CYR61,NABP1,HERPUD1,TIPARP,CDKN2AIP,CXCL2,MANF,NR4A1,FICD,DDIT3,IER2,ZFP36,DNAJC3,VEGFA
GO:0032501	multicellular organismal process	42	6507	0.23	0.00038	9606.ENSP00000230990,9606.ENSP00000239223,9606.ENSP00000239938,9606.ENSP00000242480,9606.ENSP00000244869,9606.ENSP00000249356,9606.ENSP00000252809,9606.ENSP00000263339,9606.ENSP00000264444,9606.ENSP00000265138,9606.ENSP00000270162,9606.ENSP00000272233,9606.ENSP00000273153,9606.ENSP00000279488,9606.ENSP00000280551,9606.ENSP00000288943,9606.ENSP00000306245,9606.ENSP00000306512,9606.ENSP00000307235,…	HBEGF,DUSP1,EGR1,EGR2,EREG,DNAJB9,GDF15,IL1A,MXD1,ARRDC3,SIK1,RHOB,CSRNP1,DUSP6,SEC24D,DUSP2,FOS,CXCL8,EIF2AK3,DDIT4,TNFRSF12A,ATF3,INSIG1,PTGS2,RGS16,CTGF,JUN,ANKRD1,SLC25A25,ERRFI1,GPCPD1,EDN1,XDH,ZMYM5,CYR61,KLF6,TIPARP,MANF,NR4A1,DDIT3,IER2,VEGFA
GO:0044260	cellular macromolecule metabolic process	39	6413	0.21	0.003	9606.ENSP00000200453,9606.ENSP00000230990,9606.ENSP00000239223,9606.ENSP00000239938,9606.ENSP00000242480,9606.ENSP00000244869,9606.ENSP00000249356,9606.ENSP00000256458,9606.ENSP00000264444,9606.ENSP00000270162,9606.ENSP00000273153,9606.ENSP00000273668,9606.ENSP00000279488,9606.ENSP00000288943,9606.ENSP00000306245,9606.ENSP00000306512,9606.ENSP00000307235,9606.ENSP00000312021,9606.ENSP00000326813,…	PPP1R15A,HBEGF,DUSP1,EGR1,EGR2,EREG,DNAJB9,IRAK2,MXD1,SIK1,CSRNP1,EAF2,DUSP6,DUSP2,FOS,CXCL8,EIF2AK3,FUT1,YOD1,ATF3,SERTAD1,CTGF,GADD45A,JUN,ZBTB43,E2F6,ZMYM5,VCPKMT,CYR61,NABP1,HERPUD1,KLF6,TIPARP,NR4A1,FICD,DDIT3,IER2,ZFP36,DNAJC3
GO:0050794	regulation of cellular process	60	10484	0.18	1.91e-05	9606.ENSP00000200453,9606.ENSP00000230990,9606.ENSP00000239223,9606.ENSP00000239938,9606.ENSP00000242480,9606.ENSP00000244869,9606.ENSP00000249356,9606.ENSP00000252809,9606.ENSP00000256458,9606.ENSP00000263339,9606.ENSP00000264444,9606.ENSP00000265138,9606.ENSP00000270162,9606.ENSP00000272233,9606.ENSP00000273153,9606.ENSP00000273668,9606.ENSP00000279488,9606.ENSP00000288943,9606.ENSP00000296026,…	PPP1R15A,HBEGF,DUSP1,EGR1,EGR2,EREG,DNAJB9,GDF15,IRAK2,IL1A,MXD1,ARRDC3,SIK1,RHOB,CSRNP1,EAF2,DUSP6,DUSP2,CXCL3,FOS,CXCL8,EIF2AK3,DDIT4,ZFAND2A,LURAP1L,TNFRSF12A,YOD1,ATF3,INSIG1,RASSF1,SERTAD1,TSC22D2,PTGS2,RGS16,CTGF,GADD45A,JUN,ANKRD1,ZBTB43,RND3,ERRFI1,EDN1,XDH,E2F6,ZMYM5,CYR61,NABP1,HERPUD1,KLF6,TIPARP,CDKN2AIP,CXCL2,MANF,NR4A1,FICD,DDIT3,IER2,ZFP36,DNAJC3,VEGFA
GO:0050789	regulation of biological process	61	11116	0.16	5.73e-05	9606.ENSP00000200453,9606.ENSP00000230990,9606.ENSP00000239223,9606.ENSP00000239938,9606.ENSP00000242480,9606.ENSP00000244869,9606.ENSP00000249356,9606.ENSP00000252809,9606.ENSP00000256458,9606.ENSP00000263339,9606.ENSP00000264444,9606.ENSP00000265138,9606.ENSP00000270162,9606.ENSP00000272233,9606.ENSP00000273153,9606.ENSP00000273668,9606.ENSP00000279488,9606.ENSP00000288943,9606.ENSP00000296026,…	PPP1R15A,HBEGF,DUSP1,EGR1,EGR2,EREG,DNAJB9,GDF15,IRAK2,IL1A,MXD1,ARRDC3,SIK1,RHOB,CSRNP1,EAF2,DUSP6,DUSP2,CXCL3,FOS,CXCL8,EIF2AK3,DDIT4,ZFAND2A,LURAP1L,TNFRSF12A,YOD1,ATF3,INSIG1,RASSF1,SERTAD1,TSC22D2,PTGS2,RGS16,CTGF,GPR89B,GADD45A,JUN,ANKRD1,ZBTB43,RND3,ERRFI1,EDN1,XDH,E2F6,ZMYM5,CYR61,NABP1,HERPUD1,KLF6,TIPARP,CDKN2AIP,CXCL2,MANF,NR4A1,FICD,DDIT3,IER2,ZFP36,DNAJC3,VEGFA
GO:0044237	cellular metabolic process	48	8797	0.16	0.004	9606.ENSP00000200453,9606.ENSP00000230990,9606.ENSP00000239223,9606.ENSP00000239938,9606.ENSP00000242480,9606.ENSP00000244869,9606.ENSP00000249356,9606.ENSP00000256458,9606.ENSP00000263960,9606.ENSP00000264444,9606.ENSP00000270162,9606.ENSP00000273153,9606.ENSP00000273668,9606.ENSP00000278590,9606.ENSP00000279488,9606.ENSP00000288943,9606.ENSP00000306245,9606.ENSP00000306512,9606.ENSP00000307235,…	PPP1R15A,HBEGF,DUSP1,EGR1,EGR2,EREG,DNAJB9,IRAK2,COQ10B,MXD1,SIK1,CSRNP1,EAF2,ZC3H12C,DUSP6,DUSP2,FOS,CXCL8,EIF2AK3,DDIT4,FUT1,YOD1,ATF3,INSIG1,SERTAD1,PTGS2,CTGF,GADD45A,JUN,SLC25A25,ZBTB43,GPCPD1,EDN1,XDH,E2F6,ZMYM5,VCPKMT,CYR61,NABP1,HERPUD1,KLF6,TIPARP,NR4A1,FICD,DDIT3,IER2,ZFP36,DNAJC3
GO:0065007	biological regulation	63	11740	0.15	5.23e-05	9606.ENSP00000200453,9606.ENSP00000230990,9606.ENSP00000239223,9606.ENSP00000239938,9606.ENSP00000242480,9606.ENSP00000244869,9606.ENSP00000249356,9606.ENSP00000252809,9606.ENSP00000256458,9606.ENSP00000263339,9606.ENSP00000264444,9606.ENSP00000265138,9606.ENSP00000270162,9606.ENSP00000272233,9606.ENSP00000273153,9606.ENSP00000273668,9606.ENSP00000279488,9606.ENSP00000288943,9606.ENSP00000296026,…	PPP1R15A,HBEGF,DUSP1,EGR1,EGR2,EREG,DNAJB9,GDF15,IRAK2,IL1A,MXD1,ARRDC3,SIK1,RHOB,CSRNP1,EAF2,DUSP6,DUSP2,CXCL3,FOS,CXCL8,EIF2AK3,DDIT4,ZFAND2A,LURAP1L,TNFRSF12A,YOD1,ATF3,INSIG1,RASSF1,SERTAD1,TSC22D2,PTGS2,RGS16,CTGF,GPR89B,GADD45A,JUN,ANKRD1,ZBTB43,RND3,ERRFI1,GPCPD1,EDN1,XDH,E2F6,ZMYM5,VCPKMT,CYR61,NABP1,HERPUD1,KLF6,TIPARP,CDKN2AIP,CXCL2,MANF,NR4A1,FICD,DDIT3,IER2,ZFP36,DNAJC3,VEGFA
GO:0043170	macromolecule metabolic process	40	7453	0.15	0.0226	9606.ENSP00000200453,9606.ENSP00000230990,9606.ENSP00000239223,9606.ENSP00000239938,9606.ENSP00000242480,9606.ENSP00000244869,9606.ENSP00000249356,9606.ENSP00000256458,9606.ENSP00000264444,9606.ENSP00000270162,9606.ENSP00000273153,9606.ENSP00000273668,9606.ENSP00000278590,9606.ENSP00000279488,9606.ENSP00000288943,9606.ENSP00000306245,9606.ENSP00000306512,9606.ENSP00000307235,9606.ENSP00000312021,…	PPP1R15A,HBEGF,DUSP1,EGR1,EGR2,EREG,DNAJB9,IRAK2,MXD1,SIK1,CSRNP1,EAF2,ZC3H12C,DUSP6,DUSP2,FOS,CXCL8,EIF2AK3,FUT1,YOD1,ATF3,SERTAD1,CTGF,GADD45A,JUN,ZBTB43,E2F6,ZMYM5,VCPKMT,CYR61,NABP1,HERPUD1,KLF6,TIPARP,NR4A1,FICD,DDIT3,IER2,ZFP36,DNAJC3
GO:0071704	organic substance metabolic process	47	9135	0.13	0.0169	9606.ENSP00000200453,9606.ENSP00000230990,9606.ENSP00000239223,9606.ENSP00000239938,9606.ENSP00000242480,9606.ENSP00000244869,9606.ENSP00000249356,9606.ENSP00000256458,9606.ENSP00000263960,9606.ENSP00000264444,9606.ENSP00000270162,9606.ENSP00000273153,9606.ENSP00000273668,9606.ENSP00000278590,9606.ENSP00000279488,9606.ENSP00000288943,9606.ENSP00000306245,9606.ENSP00000306512,9606.ENSP00000307235,…	PPP1R15A,HBEGF,DUSP1,EGR1,EGR2,EREG,DNAJB9,IRAK2,COQ10B,MXD1,SIK1,CSRNP1,EAF2,ZC3H12C,DUSP6,DUSP2,FOS,CXCL8,EIF2AK3,FUT1,YOD1,ATF3,INSIG1,SERTAD1,PTGS2,CTGF,GADD45A,JUN,SLC25A25,ZBTB43,GPCPD1,EDN1,XDH,E2F6,ZMYM5,VCPKMT,CYR61,NABP1,HERPUD1,KLF6,TIPARP,NR4A1,FICD,DDIT3,IER2,ZFP36,DNAJC3
GO:0044238	primary metabolic process	45	8808	0.13	0.0259	9606.ENSP00000200453,9606.ENSP00000230990,9606.ENSP00000239223,9606.ENSP00000239938,9606.ENSP00000242480,9606.ENSP00000244869,9606.ENSP00000249356,9606.ENSP00000256458,9606.ENSP00000264444,9606.ENSP00000270162,9606.ENSP00000273153,9606.ENSP00000273668,9606.ENSP00000278590,9606.ENSP00000279488,9606.ENSP00000288943,9606.ENSP00000306245,9606.ENSP00000307235,9606.ENSP00000312021,9606.ENSP00000326813,…	PPP1R15A,HBEGF,DUSP1,EGR1,EGR2,EREG,DNAJB9,IRAK2,MXD1,SIK1,CSRNP1,EAF2,ZC3H12C,DUSP6,DUSP2,FOS,EIF2AK3,FUT1,YOD1,ATF3,INSIG1,SERTAD1,PTGS2,CTGF,GADD45A,JUN,SLC25A25,ZBTB43,GPCPD1,EDN1,XDH,E2F6,ZMYM5,VCPKMT,CYR61,NABP1,HERPUD1,KLF6,TIPARP,NR4A1,FICD,DDIT3,IER2,ZFP36,DNAJC3
GO:0006807	nitrogen compound metabolic process	42	8349	0.12	0.0488	9606.ENSP00000200453,9606.ENSP00000230990,9606.ENSP00000239223,9606.ENSP00000239938,9606.ENSP00000242480,9606.ENSP00000244869,9606.ENSP00000249356,9606.ENSP00000256458,9606.ENSP00000264444,9606.ENSP00000270162,9606.ENSP00000273153,9606.ENSP00000273668,9606.ENSP00000278590,9606.ENSP00000279488,9606.ENSP00000288943,9606.ENSP00000306245,9606.ENSP00000307235,9606.ENSP00000312021,9606.ENSP00000326813,…	PPP1R15A,HBEGF,DUSP1,EGR1,EGR2,EREG,DNAJB9,IRAK2,MXD1,SIK1,CSRNP1,EAF2,ZC3H12C,DUSP6,DUSP2,FOS,EIF2AK3,FUT1,YOD1,ATF3,SERTAD1,PTGS2,CTGF,GADD45A,JUN,SLC25A25,ZBTB43,XDH,E2F6,ZMYM5,VCPKMT,CYR61,NABP1,HERPUD1,KLF6,TIPARP,NR4A1,FICD,DDIT3,IER2,ZFP36,DNAJC3
GO:0009987	cellular process	66	14652	0.08	0.0129	9606.ENSP00000200453,9606.ENSP00000230990,9606.ENSP00000239223,9606.ENSP00000239938,9606.ENSP00000242480,9606.ENSP00000244869,9606.ENSP00000249356,9606.ENSP00000252809,9606.ENSP00000256458,9606.ENSP00000263339,9606.ENSP00000263960,9606.ENSP00000264444,9606.ENSP00000270162,9606.ENSP00000272233,9606.ENSP00000273153,9606.ENSP00000273668,9606.ENSP00000278590,9606.ENSP00000279488,9606.ENSP00000280551,…	PPP1R15A,HBEGF,DUSP1,EGR1,EGR2,EREG,DNAJB9,GDF15,IRAK2,IL1A,COQ10B,MXD1,SIK1,RHOB,CSRNP1,EAF2,ZC3H12C,DUSP6,SEC24D,DUSP2,CXCL3,FOS,CXCL8,EIF2AK3,DDIT4,FUT1,ZFAND2A,TNFRSF12A,YOD1,ATF3,INSIG1,RASSF1,SERTAD1,PTGS2,RGS16,CTGF,GPR89B,GADD45A,JUN,ANKRD1,SLC25A25,ZBTB43,RND3,ERRFI1,GPCPD1,EDN1,XDH,E2F6,ZMYM5,VCPKMT,CYR61,NABP1,HERPUD1,KLF6,TIPARP,CDKN2AIP,CXCL2,MANF,NR4A1,FICD,DDIT3,IER2,ZFP36,DNAJC3,V…

## Sheet: Cntrl_vs_Virus_KEGG_Up_24h
Supplementary table S4: Results from the Gene Ontology (GO) analysis in the category for biological process complete (GObp) and Pathway Enrichment (KEGG pathways) in BCoV infected cells at 24 hpi.
#term ID	term description	observed gene count	background gene count	strength	false discovery rate	matching proteins in your network (IDs)	matching proteins in your network (labels)
hsa04010	MAPK signaling pathway	11	293	1	2.17e-06	9606.ENSP00000239223,9606.ENSP00000244869,9606.ENSP00000263339,9606.ENSP00000279488,9606.ENSP00000288943,9606.ENSP00000306245,9606.ENSP00000360025,9606.ENSP00000360266,9606.ENSP00000440864,9606.ENSP00000448665,9606.ENSP00000478570	DUSP1,EREG,IL1A,DUSP6,DUSP2,FOS,GADD45A,JUN,NR4A1,DDIT3,VEGFA
hsa05167	Kaposi's sarcoma-associated herpesvirus infection	8	183	1.06	3.64e-05	9606.ENSP00000296026,9606.ENSP00000306245,9606.ENSP00000306512,9606.ENSP00000356438,9606.ENSP00000360266,9606.ENSP00000427279,9606.ENSP00000469647,9606.ENSP00000478570	CXCL3,FOS,CXCL8,PTGS2,JUN,CXCL2,ZFP36,VEGFA
hsa05132	Salmonella infection	6	84	1.28	4.55e-05	9606.ENSP00000263339,9606.ENSP00000296026,9606.ENSP00000306245,9606.ENSP00000306512,9606.ENSP00000360266,9606.ENSP00000427279	IL1A,CXCL3,FOS,CXCL8,JUN,CXCL2
hsa04657	IL-17 signaling pathway	6	92	1.24	5.63e-05	9606.ENSP00000296026,9606.ENSP00000306245,9606.ENSP00000306512,9606.ENSP00000356438,9606.ENSP00000360266,9606.ENSP00000427279	CXCL3,FOS,CXCL8,PTGS2,JUN,CXCL2
hsa04933	AGE-RAGE signaling pathway in diabetic complications	6	98	1.21	6.38e-05	9606.ENSP00000239938,9606.ENSP00000263339,9606.ENSP00000306512,9606.ENSP00000360266,9606.ENSP00000368683,9606.ENSP00000478570	EGR1,IL1A,CXCL8,JUN,EDN1,VEGFA
hsa04141	Protein processing in endoplasmic reticulum	7	161	1.06	6.63e-05	9606.ENSP00000200453,9606.ENSP00000280551,9606.ENSP00000307235,9606.ENSP00000326813,9606.ENSP00000409555,9606.ENSP00000448665,9606.ENSP00000473631	PPP1R15A,SEC24D,EIF2AK3,YOD1,HERPUD1,DDIT3,DNAJC3
hsa04668	TNF signaling pathway	6	108	1.17	7.78e-05	9606.ENSP00000296026,9606.ENSP00000306245,9606.ENSP00000356438,9606.ENSP00000360266,9606.ENSP00000368683,9606.ENSP00000427279	CXCL3,FOS,PTGS2,JUN,EDN1,CXCL2
hsa05418	Fluid shear stress and atherosclerosis	6	133	1.08	0.00021	9606.ENSP00000239223,9606.ENSP00000263339,9606.ENSP00000306245,9606.ENSP00000360266,9606.ENSP00000368683,9606.ENSP00000478570	DUSP1,IL1A,FOS,JUN,EDN1,VEGFA
hsa05323	Rheumatoid arthritis	5	84	1.2	0.00029	9606.ENSP00000263339,9606.ENSP00000306245,9606.ENSP00000306512,9606.ENSP00000360266,9606.ENSP00000478570	IL1A,FOS,CXCL8,JUN,VEGFA
hsa05219	Bladder cancer	4	41	1.41	0.0003	9606.ENSP00000230990,9606.ENSP00000306512,9606.ENSP00000349547,9606.ENSP00000478570	HBEGF,CXCL8,RASSF1,VEGFA
hsa04210	Apoptosis	5	135	0.99	0.0019	9606.ENSP00000306245,9606.ENSP00000307235,9606.ENSP00000360025,9606.ENSP00000360266,9606.ENSP00000448665	FOS,EIF2AK3,GADD45A,JUN,DDIT3
hsa05140	Leishmaniasis	4	70	1.18	0.0019	9606.ENSP00000263339,9606.ENSP00000306245,9606.ENSP00000356438,9606.ENSP00000360266	IL1A,FOS,PTGS2,JUN
hsa05133	Pertussis	4	74	1.16	0.002	9606.ENSP00000263339,9606.ENSP00000306245,9606.ENSP00000306512,9606.ENSP00000360266	IL1A,FOS,CXCL8,JUN
hsa04932	Non-alcoholic fatty liver disease (NAFLD)	5	149	0.95	0.0025	9606.ENSP00000263339,9606.ENSP00000306512,9606.ENSP00000307235,9606.ENSP00000360266,9606.ENSP00000448665	IL1A,CXCL8,EIF2AK3,JUN,DDIT3
hsa05210	Colorectal cancer	4	85	1.09	0.0029	9606.ENSP00000244869,9606.ENSP00000306245,9606.ENSP00000360025,9606.ENSP00000360266	EREG,FOS,GADD45A,JUN
hsa05166	HTLV-I infection	6	250	0.8	0.0031	9606.ENSP00000239938,9606.ENSP00000242480,9606.ENSP00000306245,9606.ENSP00000344352,9606.ENSP00000360266,9606.ENSP00000469647	EGR1,EGR2,FOS,ATF3,JUN,ZFP36
hsa05164	Influenza A	5	168	0.9	0.0035	9606.ENSP00000263339,9606.ENSP00000306512,9606.ENSP00000307235,9606.ENSP00000360266,9606.ENSP00000473631	IL1A,CXCL8,EIF2AK3,JUN,DNAJC3
hsa04060	Cytokine-cytokine receptor interaction	6	263	0.78	0.0036	9606.ENSP00000263339,9606.ENSP00000296026,9606.ENSP00000306512,9606.ENSP00000326737,9606.ENSP00000427279,9606.ENSP00000478570	IL1A,CXCL3,CXCL8,TNFRSF12A,CXCL2,VEGFA
hsa05134	Legionellosis	3	54	1.17	0.0083	9606.ENSP00000296026,9606.ENSP00000306512,9606.ENSP00000427279	CXCL3,CXCL8,CXCL2
hsa04926	Relaxin signaling pathway	4	130	0.91	0.01	9606.ENSP00000306245,9606.ENSP00000360266,9606.ENSP00000368683,9606.ENSP00000478570	FOS,JUN,EDN1,VEGFA
hsa05120	Epithelial cell signaling in Helicobacter pylori infection	3	66	1.08	0.013	9606.ENSP00000230990,9606.ENSP00000306512,9606.ENSP00000360266	HBEGF,CXCL8,JUN
hsa05161	Hepatitis B	4	142	0.87	0.013	9606.ENSP00000242480,9606.ENSP00000306245,9606.ENSP00000306512,9606.ENSP00000360266	EGR2,FOS,CXCL8,JUN
hsa05206	MicroRNAs in cancer	4	149	0.85	0.014	9606.ENSP00000307305,9606.ENSP00000349547,9606.ENSP00000356438,9606.ENSP00000478570	DDIT4,RASSF1,PTGS2,VEGFA
hsa05200	Pathways in cancer	7	515	0.56	0.0176	9606.ENSP00000306245,9606.ENSP00000306512,9606.ENSP00000349547,9606.ENSP00000356438,9606.ENSP00000360025,9606.ENSP00000360266,9606.ENSP00000478570	FOS,CXCL8,RASSF1,PTGS2,GADD45A,JUN,VEGFA
hsa04621	NOD-like receptor signaling pathway	4	166	0.8	0.0188	9606.ENSP00000296026,9606.ENSP00000306512,9606.ENSP00000360266,9606.ENSP00000427279	CXCL3,CXCL8,JUN,CXCL2
hsa04012	ErbB signaling pathway	3	83	0.98	0.0193	9606.ENSP00000230990,9606.ENSP00000244869,9606.ENSP00000360266	HBEGF,EREG,JUN
hsa05202	Transcriptional misregulation in cancer	4	169	0.8	0.0193	9606.ENSP00000279488,9606.ENSP00000306512,9606.ENSP00000360025,9606.ENSP00000448665	DUSP6,CXCL8,GADD45A,DDIT3
hsa04064	NF-kappa B signaling pathway	3	93	0.93	0.0247	9606.ENSP00000306512,9606.ENSP00000356438,9606.ENSP00000427279	CXCL8,PTGS2,CXCL2
hsa01522	Endocrine resistance	3	95	0.92	0.0252	9606.ENSP00000230990,9606.ENSP00000306245,9606.ENSP00000360266	HBEGF,FOS,JUN
hsa05231	Choline metabolism in cancer	3	98	0.91	0.0265	9606.ENSP00000306245,9606.ENSP00000360266,9606.ENSP00000368305	FOS,JUN,GPCPD1
hsa04620	Toll-like receptor signaling pathway	3	102	0.89	0.0278	9606.ENSP00000306245,9606.ENSP00000306512,9606.ENSP00000360266	FOS,CXCL8,JUN
hsa05142	Chagas disease (American trypanosomiasis)	3	101	0.9	0.0278	9606.ENSP00000306245,9606.ENSP00000306512,9606.ENSP00000360266	FOS,CXCL8,JUN
hsa05020	Prion diseases	2	33	1.2	0.0282	9606.ENSP00000239938,9606.ENSP00000263339	EGR1,IL1A
hsa04380	Osteoclast differentiation	3	124	0.81	0.0436	9606.ENSP00000263339,9606.ENSP00000306245,9606.ENSP00000360266	IL1A,FOS,JUN

## Sheet: Cntrl_vs_Virus_Bio_Down_24h
Supplementary table S4: Results from the Gene Ontology (GO) analysis in the category for biological process complete (GObp) and Pathway Enrichment (KEGG pathways) in BCoV infected cells at 24 hpi.
No GObp were identified due to the small number of downregulated genes

## Sheet: Cntrl_vs_Virus_KEGG_Down_24h
No KEGG pathways were identified due to the small number of downregulated genes
