# Supplementary material for: Gene expression profile of HCT-8 cells following single or co-infections with Cryptosporidium parvum and bovine coronavirus
Source: Research Square preprint supplement (doi:10.21203/rs.3.rs-2673942/v1), 2023-03-23
Supplement: Supplementary file 12 [file e21c75d4a6b2bbd51de9923e.xlsx]

## Sheet: 1st-2000_genes_Bio_proc_up
Supplementary table S9: Results from the Gene Ontology (GO) analysis in the category for biological process complete (GObp) and Pathway Enrichment (KEGG pathways) in co-infected cells at 72 hpi. Analysis was performed with the 2000 most regulated differentially expressed genes.
#term ID	term description	observed gene count	background gene count	strength	false discovery rate	matching proteins in your network (IDs)	matching proteins in your network (labels)
GO:0031323	regulation of cellular metabolic process	825	6082	0.17	2.58e-34	9606.ENSP00000013125,9606.ENSP00000014914,9606.ENSP00000056217,9606.ENSP00000157600,9606.ENSP00000158771,9606.ENSP00000164024,9606.ENSP00000164133,9606.ENSP00000164227,9606.ENSP00000166139,9606.ENSP00000171111,9606.ENSP00000179259,9606.ENSP00000185150,9606.ENSP00000196489,9606.ENSP00000198767,9606.ENSP00000199320,9606.ENSP00000200453,9606.ENSP00000209728,9606.ENSP00000211936,9606.ENSP00000212015,…	MAP4K5,GPRC5A,ARHGEF5,LMCD1,DERL2,CELSR3,PPP2R5B,BCL3,FSTL3,KEAP1,C12orf5,ERLEC1,ZNF416,RRN3,DIMT1,PPP1R15A,CDC6,ZNF184,SIRT1,GADD45B,XBP1,HMOX1,PHF5A,SNAPC1,ALKBH1,BDKRB1,NFKBIA,CHMP4B,GLA,EHD4,AGO2,BRF2,RIPK2,MTMR9,RELB,SGTA,ERF,NAMPT,SERPINE1,SETX,PPIF,TBC1D12,RASD1,NFKB1,PRDM4,CSRNP2,CYP27B1,GCLC,MDFI,GUCA1B,HBEGF,TUSC2,ODC1,CEBPZ,DLX2,MSH6,PRDM2,RGS2,ELL2,RHOQ,ATAD2B,DUSP1,ELF1,EGR1,DUSP4,AH…
GO:0019222	regulation of metabolic process	858	6516	0.16	2.65e-32	9606.ENSP00000013125,9606.ENSP00000014914,9606.ENSP00000056217,9606.ENSP00000157600,9606.ENSP00000158771,9606.ENSP00000164024,9606.ENSP00000164133,9606.ENSP00000164227,9606.ENSP00000166139,9606.ENSP00000171111,9606.ENSP00000179259,9606.ENSP00000185150,9606.ENSP00000196489,9606.ENSP00000198767,9606.ENSP00000199320,9606.ENSP00000200453,9606.ENSP00000209728,9606.ENSP00000211936,9606.ENSP00000212015,…	MAP4K5,GPRC5A,ARHGEF5,LMCD1,DERL2,CELSR3,PPP2R5B,BCL3,FSTL3,KEAP1,C12orf5,ERLEC1,ZNF416,RRN3,DIMT1,PPP1R15A,CDC6,ZNF184,SIRT1,GADD45B,XBP1,HMOX1,PHF5A,SNAPC1,ALKBH1,BDKRB1,NFKBIA,CHMP4B,GLA,EHD4,AGO2,BRF2,RIPK2,MTMR9,RELB,SGTA,ERF,NAMPT,SERPINE1,SETX,PPIF,TBC1D12,RASD1,NFKB1,PRDM4,CSRNP2,CYP27B1,GCLC,MDFI,GUCA1B,HBEGF,TUSC2,ODC1,CEBPZ,DLX2,MSH6,PRDM2,RGS2,ELL2,RHOQ,ATAD2B,DUSP1,ELF1,EGR1,DUSP4,AH…
GO:0080090	regulation of primary metabolic process	806	5982	0.17	2.65e-32	9606.ENSP00000013125,9606.ENSP00000014914,9606.ENSP00000056217,9606.ENSP00000157600,9606.ENSP00000158771,9606.ENSP00000164024,9606.ENSP00000164133,9606.ENSP00000164227,9606.ENSP00000166139,9606.ENSP00000171111,9606.ENSP00000179259,9606.ENSP00000185150,9606.ENSP00000196489,9606.ENSP00000198767,9606.ENSP00000199320,9606.ENSP00000200453,9606.ENSP00000209728,9606.ENSP00000211936,9606.ENSP00000212015,…	MAP4K5,GPRC5A,ARHGEF5,LMCD1,DERL2,CELSR3,PPP2R5B,BCL3,FSTL3,KEAP1,C12orf5,ERLEC1,ZNF416,RRN3,DIMT1,PPP1R15A,CDC6,ZNF184,SIRT1,GADD45B,XBP1,HMOX1,PHF5A,SNAPC1,ALKBH1,BDKRB1,NFKBIA,EHD4,AGO2,BRF2,RIPK2,MTMR9,RELB,SGTA,ERF,NAMPT,SERPINE1,SETX,PPIF,RASD1,NFKB1,PRDM4,CSRNP2,CYP27B1,GCLC,MDFI,GUCA1B,HBEGF,ODC1,CEBPZ,DLX2,MSH6,PRDM2,RGS2,ELL2,RHOQ,ATAD2B,DUSP1,ELF1,EGR1,DUSP4,AHR,EGR2,ORMDL2,SNAI1,EREG,…
GO:0051171	regulation of nitrogen compound metabolic process	787	5827	0.17	1.02e-31	9606.ENSP00000013125,9606.ENSP00000014914,9606.ENSP00000056217,9606.ENSP00000157600,9606.ENSP00000158771,9606.ENSP00000164024,9606.ENSP00000164133,9606.ENSP00000164227,9606.ENSP00000166139,9606.ENSP00000171111,9606.ENSP00000179259,9606.ENSP00000185150,9606.ENSP00000196489,9606.ENSP00000198767,9606.ENSP00000199320,9606.ENSP00000200453,9606.ENSP00000209728,9606.ENSP00000211936,9606.ENSP00000212015,…	MAP4K5,GPRC5A,ARHGEF5,LMCD1,DERL2,CELSR3,PPP2R5B,BCL3,FSTL3,KEAP1,C12orf5,ERLEC1,ZNF416,RRN3,DIMT1,PPP1R15A,CDC6,ZNF184,SIRT1,GADD45B,XBP1,HMOX1,PHF5A,SNAPC1,ALKBH1,BDKRB1,NFKBIA,GLA,EHD4,AGO2,BRF2,RIPK2,RELB,SGTA,ERF,NAMPT,SERPINE1,SETX,PPIF,RASD1,NFKB1,PRDM4,CSRNP2,GCLC,MDFI,GUCA1B,HBEGF,ODC1,CEBPZ,DLX2,MSH6,PRDM2,RGS2,ELL2,RHOQ,ATAD2B,DUSP1,ELF1,EGR1,DUSP4,AHR,EGR2,ORMDL2,SNAI1,EREG,IRF1,INSIG…
GO:0044260	cellular macromolecule metabolic process	838	6413	0.16	4.07e-30	9606.ENSP00000013125,9606.ENSP00000035307,9606.ENSP00000040738,9606.ENSP00000053468,9606.ENSP00000157600,9606.ENSP00000158771,9606.ENSP00000164227,9606.ENSP00000166139,9606.ENSP00000171111,9606.ENSP00000185150,9606.ENSP00000196489,9606.ENSP00000198767,9606.ENSP00000199320,9606.ENSP00000200453,9606.ENSP00000209728,9606.ENSP00000211936,9606.ENSP00000212015,9606.ENSP00000215904,9606.ENSP00000216037,…	MAP4K5,CHPF2,BOD1L1,MRPS10,LMCD1,DERL2,BCL3,FSTL3,KEAP1,ERLEC1,ZNF416,RRN3,DIMT1,PPP1R15A,CDC6,ZNF184,SIRT1,PDXP,XBP1,JOSD1,PHF5A,BRD1,SNAPC1,ALKBH1,NFKBIA,CSTF1,CHMP4B,PSMD7,AGO2,BRF2,RIPK2,RELB,SGTA,ERF,FKBP14,SETX,PPIF,NFKB1,PRDM4,CSRNP2,FGFR1OP2,HARS2,HBEGF,KLHL18,CEBPZ,DLX2,MSH6,PRDM2,FBXO30,RNF103,STBD1,ELL2,DUSP1,ELF1,ALG5,EGR1,DUSP4,KALRN,AHR,EGR2,RNF11,EREG,IRF1,C3,FOSB,PLAGL2,NR1D1,WNK4…
GO:0060255	regulation of macromolecule metabolic process	801	6072	0.16	2.29e-29	9606.ENSP00000013125,9606.ENSP00000014914,9606.ENSP00000056217,9606.ENSP00000157600,9606.ENSP00000158771,9606.ENSP00000164024,9606.ENSP00000164133,9606.ENSP00000164227,9606.ENSP00000166139,9606.ENSP00000171111,9606.ENSP00000179259,9606.ENSP00000185150,9606.ENSP00000196489,9606.ENSP00000198767,9606.ENSP00000199320,9606.ENSP00000200453,9606.ENSP00000209728,9606.ENSP00000211936,9606.ENSP00000212015,…	MAP4K5,GPRC5A,ARHGEF5,LMCD1,DERL2,CELSR3,PPP2R5B,BCL3,FSTL3,KEAP1,C12orf5,ERLEC1,ZNF416,RRN3,DIMT1,PPP1R15A,CDC6,ZNF184,SIRT1,GADD45B,XBP1,HMOX1,PHF5A,SNAPC1,ALKBH1,BDKRB1,NFKBIA,EHD4,AGO2,BRF2,RIPK2,MTMR9,RELB,SGTA,ERF,NAMPT,SERPINE1,SETX,RASD1,NFKB1,PRDM4,CSRNP2,GCLC,MDFI,HBEGF,ODC1,CEBPZ,DLX2,MSH6,PRDM2,RGS2,ELL2,RHOQ,ATAD2B,DUSP1,ELF1,EGR1,DUSP4,AHR,EGR2,ORMDL2,SNAI1,EREG,IRF1,INSIG2,C3,FOSB,…
GO:0043170	macromolecule metabolic process	929	7453	0.14	3.69e-28	9606.ENSP00000013125,9606.ENSP00000035307,9606.ENSP00000040738,9606.ENSP00000053468,9606.ENSP00000157600,9606.ENSP00000158771,9606.ENSP00000161006,9606.ENSP00000164227,9606.ENSP00000166139,9606.ENSP00000170564,9606.ENSP00000171111,9606.ENSP00000185150,9606.ENSP00000196489,9606.ENSP00000198767,9606.ENSP00000199320,9606.ENSP00000200453,9606.ENSP00000209728,9606.ENSP00000211936,9606.ENSP00000212015,…	MAP4K5,CHPF2,BOD1L1,MRPS10,LMCD1,DERL2,PRSS22,BCL3,FSTL3,GPATCH1,KEAP1,ERLEC1,ZNF416,RRN3,DIMT1,PPP1R15A,CDC6,ZNF184,SIRT1,PDXP,XBP1,RTCB,JOSD1,PHF5A,BRD1,SNAPC1,ALKBH1,NFKBIA,CSTF1,CHMP4B,PSMD7,AGO2,BRF2,RIPK2,RELB,SGTA,ERF,FKBP14,SETX,PPIF,NFKB1,PRDM4,CSRNP2,FGFR1OP2,BYSL,HARS2,HBEGF,KLHL18,CEBPZ,DLX2,MSH6,PRDM2,FBXO30,RNF103,STBD1,ELL2,DDX55,DUSP1,ELF1,ALG5,EGR1,DUSP4,KALRN,AHR,EGR2,RNF11,MPHO…
GO:0009889	regulation of biosynthetic process	612	4337	0.19	1.39e-26	9606.ENSP00000056217,9606.ENSP00000157600,9606.ENSP00000164133,9606.ENSP00000164227,9606.ENSP00000166139,9606.ENSP00000171111,9606.ENSP00000179259,9606.ENSP00000196489,9606.ENSP00000198767,9606.ENSP00000200453,9606.ENSP00000209728,9606.ENSP00000211936,9606.ENSP00000212015,9606.ENSP00000216037,9606.ENSP00000216117,9606.ENSP00000216252,9606.ENSP00000216294,9606.ENSP00000216489,9606.ENSP00000216797,…	ARHGEF5,LMCD1,PPP2R5B,BCL3,FSTL3,KEAP1,C12orf5,ZNF416,RRN3,PPP1R15A,CDC6,ZNF184,SIRT1,XBP1,HMOX1,PHF5A,SNAPC1,ALKBH1,NFKBIA,GLA,AGO2,BRF2,RIPK2,RELB,ERF,NAMPT,SERPINE1,SETX,RASD1,NFKB1,PRDM4,CSRNP2,CYP27B1,GCLC,MDFI,GUCA1B,HBEGF,CEBPZ,DLX2,PRDM2,RGS2,ELL2,RHOQ,ATAD2B,DUSP1,ELF1,EGR1,AHR,EGR2,ORMDL2,SNAI1,EREG,IRF1,INSIG2,C3,FOSB,PLAGL2,NR1D1,ZNF317,ZNF10,TICAM1,LIF,DLL4,FXR2,EGLN3,MKNK2,PBX4,RAF1…
GO:0031326	regulation of cellular biosynthetic process	603	4266	0.19	2.89e-26	9606.ENSP00000056217,9606.ENSP00000157600,9606.ENSP00000164133,9606.ENSP00000164227,9606.ENSP00000166139,9606.ENSP00000171111,9606.ENSP00000179259,9606.ENSP00000196489,9606.ENSP00000198767,9606.ENSP00000200453,9606.ENSP00000209728,9606.ENSP00000211936,9606.ENSP00000212015,9606.ENSP00000216037,9606.ENSP00000216117,9606.ENSP00000216252,9606.ENSP00000216294,9606.ENSP00000216489,9606.ENSP00000216797,…	ARHGEF5,LMCD1,PPP2R5B,BCL3,FSTL3,KEAP1,C12orf5,ZNF416,RRN3,PPP1R15A,CDC6,ZNF184,SIRT1,XBP1,HMOX1,PHF5A,SNAPC1,ALKBH1,NFKBIA,GLA,AGO2,BRF2,RIPK2,RELB,ERF,NAMPT,SERPINE1,SETX,RASD1,NFKB1,PRDM4,CSRNP2,CYP27B1,GCLC,MDFI,GUCA1B,HBEGF,CEBPZ,DLX2,PRDM2,RGS2,ELL2,RHOQ,ATAD2B,DUSP1,ELF1,EGR1,AHR,EGR2,ORMDL2,SNAI1,EREG,IRF1,INSIG2,C3,FOSB,PLAGL2,NR1D1,ZNF317,ZNF10,TICAM1,LIF,DLL4,FXR2,EGLN3,MKNK2,PBX4,RAF1…
GO:0044237	cellular metabolic process	1043	8797	0.12	6.07e-26	9606.ENSP00000009041,9606.ENSP00000013125,9606.ENSP00000035307,9606.ENSP00000040738,9606.ENSP00000053468,9606.ENSP00000075120,9606.ENSP00000157600,9606.ENSP00000158771,9606.ENSP00000164227,9606.ENSP00000166139,9606.ENSP00000170564,9606.ENSP00000171111,9606.ENSP00000179259,9606.ENSP00000185150,9606.ENSP00000196489,9606.ENSP00000198767,9606.ENSP00000199320,9606.ENSP00000200453,9606.ENSP00000209728,…	STARD3NL,MAP4K5,CHPF2,BOD1L1,MRPS10,SLC2A3,LMCD1,DERL2,BCL3,FSTL3,GPATCH1,KEAP1,C12orf5,ERLEC1,ZNF416,RRN3,DIMT1,PPP1R15A,CDC6,NANS,ZNF184,SIRT1,PDXP,XBP1,RTCB,JOSD1,HMOX1,PHF5A,BRD1,SNAPC1,ALKBH1,NFKBIA,CSTF1,CHMP4B,GLA,PSMD7,VPS18,AGO2,BRF2,RIPK2,MTMR9,GSR,DHDH,RELB,SGTA,ERF,NAMPT,FKBP14,SETX,PPIF,NFKB1,PDHX,PRDM4,CSRNP2,CYP27B1,FGFR1OP2,GCLC,BYSL,HARS2,HBEGF,BNIP1,KLHL18,ODC1,CEBPZ,DLX2,MSH6,P…
GO:0051252	regulation of RNA metabolic process	560	3890	0.2	1.3e-25	9606.ENSP00000056217,9606.ENSP00000157600,9606.ENSP00000164133,9606.ENSP00000164227,9606.ENSP00000166139,9606.ENSP00000171111,9606.ENSP00000196489,9606.ENSP00000198767,9606.ENSP00000199320,9606.ENSP00000209728,9606.ENSP00000211936,9606.ENSP00000212015,9606.ENSP00000216037,9606.ENSP00000216117,9606.ENSP00000216252,9606.ENSP00000216294,9606.ENSP00000216797,9606.ENSP00000220592,9606.ENSP00000220659,…	ARHGEF5,LMCD1,PPP2R5B,BCL3,FSTL3,KEAP1,ZNF416,RRN3,DIMT1,CDC6,ZNF184,SIRT1,XBP1,HMOX1,PHF5A,SNAPC1,NFKBIA,AGO2,BRF2,RIPK2,RELB,ERF,NAMPT,SERPINE1,SETX,RASD1,NFKB1,PRDM4,CSRNP2,GCLC,MDFI,CEBPZ,DLX2,PRDM2,ELL2,RHOQ,ATAD2B,ELF1,EGR1,AHR,EGR2,SNAI1,EREG,IRF1,INSIG2,FOSB,PLAGL2,NR1D1,ZNF317,ZNF10,TICAM1,LIF,DLL4,EGLN3,PBX4,RAF1,MED17,SAFB2,GDF15,JUND,SESN2,PPIL4,RARA,THAP1,DNAJB1,RRP8,H3F3B,KDM6B,JAG1…
GO:0019219	regulation of nucleobase-containing compound metabolic process	585	4133	0.19	1.93e-25	9606.ENSP00000056217,9606.ENSP00000157600,9606.ENSP00000164133,9606.ENSP00000164227,9606.ENSP00000166139,9606.ENSP00000171111,9606.ENSP00000179259,9606.ENSP00000196489,9606.ENSP00000198767,9606.ENSP00000199320,9606.ENSP00000209728,9606.ENSP00000211936,9606.ENSP00000212015,9606.ENSP00000216037,9606.ENSP00000216117,9606.ENSP00000216252,9606.ENSP00000216294,9606.ENSP00000216797,9606.ENSP00000220592,…	ARHGEF5,LMCD1,PPP2R5B,BCL3,FSTL3,KEAP1,C12orf5,ZNF416,RRN3,DIMT1,CDC6,ZNF184,SIRT1,XBP1,HMOX1,PHF5A,SNAPC1,NFKBIA,AGO2,BRF2,RIPK2,RELB,ERF,NAMPT,SERPINE1,SETX,PPIF,RASD1,NFKB1,PRDM4,CSRNP2,GCLC,MDFI,GUCA1B,CEBPZ,DLX2,MSH6,PRDM2,ELL2,RHOQ,ATAD2B,DUSP1,ELF1,EGR1,AHR,EGR2,SNAI1,EREG,IRF1,INSIG2,FOSB,PLAGL2,NR1D1,ZNF317,ZNF10,TICAM1,LIF,DLL4,EGLN3,PBX4,RAF1,MED17,SAFB2,GDF15,JUND,SESN2,PPIL4,RARA,THA…
GO:0010556	regulation of macromolecule biosynthetic process	584	4143	0.19	5.5e-25	9606.ENSP00000056217,9606.ENSP00000157600,9606.ENSP00000164133,9606.ENSP00000164227,9606.ENSP00000166139,9606.ENSP00000171111,9606.ENSP00000196489,9606.ENSP00000198767,9606.ENSP00000200453,9606.ENSP00000209728,9606.ENSP00000211936,9606.ENSP00000212015,9606.ENSP00000216037,9606.ENSP00000216117,9606.ENSP00000216252,9606.ENSP00000216294,9606.ENSP00000216489,9606.ENSP00000216797,9606.ENSP00000220592,…	ARHGEF5,LMCD1,PPP2R5B,BCL3,FSTL3,KEAP1,ZNF416,RRN3,PPP1R15A,CDC6,ZNF184,SIRT1,XBP1,HMOX1,PHF5A,SNAPC1,ALKBH1,NFKBIA,AGO2,BRF2,RIPK2,RELB,ERF,NAMPT,SERPINE1,SETX,RASD1,NFKB1,PRDM4,CSRNP2,GCLC,MDFI,HBEGF,CEBPZ,DLX2,PRDM2,RGS2,ELL2,RHOQ,ATAD2B,DUSP1,ELF1,EGR1,AHR,EGR2,ORMDL2,SNAI1,EREG,IRF1,INSIG2,FOSB,PLAGL2,NR1D1,ZNF317,ZNF10,TICAM1,LIF,DLL4,FXR2,EGLN3,MKNK2,PBX4,RAF1,MED17,SAFB2,GDF15,JUND,SESN2,…
GO:1903506	regulation of nucleic acid-templated transcription	532	3683	0.2	2.55e-24	9606.ENSP00000056217,9606.ENSP00000157600,9606.ENSP00000164133,9606.ENSP00000164227,9606.ENSP00000166139,9606.ENSP00000171111,9606.ENSP00000196489,9606.ENSP00000198767,9606.ENSP00000209728,9606.ENSP00000211936,9606.ENSP00000212015,9606.ENSP00000216037,9606.ENSP00000216117,9606.ENSP00000216252,9606.ENSP00000216294,9606.ENSP00000216797,9606.ENSP00000220592,9606.ENSP00000220659,9606.ENSP00000220751,…	ARHGEF5,LMCD1,PPP2R5B,BCL3,FSTL3,KEAP1,ZNF416,RRN3,CDC6,ZNF184,SIRT1,XBP1,HMOX1,PHF5A,SNAPC1,NFKBIA,AGO2,BRF2,RIPK2,RELB,ERF,NAMPT,SERPINE1,SETX,RASD1,NFKB1,PRDM4,CSRNP2,GCLC,MDFI,CEBPZ,DLX2,PRDM2,ELL2,RHOQ,ATAD2B,ELF1,EGR1,AHR,EGR2,SNAI1,EREG,IRF1,INSIG2,FOSB,PLAGL2,NR1D1,ZNF317,ZNF10,TICAM1,LIF,DLL4,EGLN3,PBX4,RAF1,MED17,SAFB2,GDF15,JUND,SESN2,PPIL4,RARA,THAP1,DNAJB1,RRP8,H3F3B,KDM6B,JAG1,IGHMB…
GO:2000112	regulation of cellular macromolecule biosynthetic process	571	4050	0.19	2.66e-24	9606.ENSP00000056217,9606.ENSP00000157600,9606.ENSP00000164133,9606.ENSP00000164227,9606.ENSP00000166139,9606.ENSP00000171111,9606.ENSP00000196489,9606.ENSP00000198767,9606.ENSP00000200453,9606.ENSP00000209728,9606.ENSP00000211936,9606.ENSP00000212015,9606.ENSP00000216037,9606.ENSP00000216117,9606.ENSP00000216252,9606.ENSP00000216294,9606.ENSP00000216489,9606.ENSP00000216797,9606.ENSP00000220592,…	ARHGEF5,LMCD1,PPP2R5B,BCL3,FSTL3,KEAP1,ZNF416,RRN3,PPP1R15A,CDC6,ZNF184,SIRT1,XBP1,HMOX1,PHF5A,SNAPC1,ALKBH1,NFKBIA,AGO2,BRF2,RIPK2,RELB,ERF,NAMPT,SERPINE1,SETX,RASD1,NFKB1,PRDM4,CSRNP2,GCLC,MDFI,HBEGF,CEBPZ,DLX2,PRDM2,RGS2,ELL2,RHOQ,ATAD2B,DUSP1,ELF1,EGR1,AHR,EGR2,SNAI1,EREG,IRF1,INSIG2,FOSB,PLAGL2,NR1D1,ZNF317,ZNF10,TICAM1,LIF,DLL4,FXR2,EGLN3,MKNK2,PBX4,RAF1,MED17,SAFB2,GDF15,JUND,SESN2,PPIL4,R…
GO:0006355	regulation of transcription, DNA-templated	526	3661	0.2	1.56e-23	9606.ENSP00000056217,9606.ENSP00000157600,9606.ENSP00000164133,9606.ENSP00000164227,9606.ENSP00000166139,9606.ENSP00000171111,9606.ENSP00000196489,9606.ENSP00000198767,9606.ENSP00000209728,9606.ENSP00000211936,9606.ENSP00000212015,9606.ENSP00000216037,9606.ENSP00000216117,9606.ENSP00000216252,9606.ENSP00000216294,9606.ENSP00000216797,9606.ENSP00000220592,9606.ENSP00000220659,9606.ENSP00000220751,…	ARHGEF5,LMCD1,PPP2R5B,BCL3,FSTL3,KEAP1,ZNF416,RRN3,CDC6,ZNF184,SIRT1,XBP1,HMOX1,PHF5A,SNAPC1,NFKBIA,AGO2,BRF2,RIPK2,RELB,ERF,NAMPT,SERPINE1,SETX,RASD1,NFKB1,PRDM4,CSRNP2,GCLC,MDFI,CEBPZ,DLX2,PRDM2,ELL2,RHOQ,ATAD2B,ELF1,EGR1,AHR,EGR2,SNAI1,EREG,IRF1,INSIG2,FOSB,PLAGL2,NR1D1,ZNF317,ZNF10,TICAM1,LIF,DLL4,EGLN3,PBX4,RAF1,MED17,SAFB2,GDF15,JUND,SESN2,PPIL4,RARA,THAP1,DNAJB1,RRP8,H3F3B,KDM6B,JAG1,IGHMB…
GO:0010468	regulation of gene expression	616	4533	0.18	4.21e-23	9606.ENSP00000056217,9606.ENSP00000157600,9606.ENSP00000164133,9606.ENSP00000164227,9606.ENSP00000166139,9606.ENSP00000171111,9606.ENSP00000196489,9606.ENSP00000198767,9606.ENSP00000199320,9606.ENSP00000200453,9606.ENSP00000209728,9606.ENSP00000211936,9606.ENSP00000212015,9606.ENSP00000216037,9606.ENSP00000216117,9606.ENSP00000216252,9606.ENSP00000216294,9606.ENSP00000216489,9606.ENSP00000216797,…	ARHGEF5,LMCD1,PPP2R5B,BCL3,FSTL3,KEAP1,ZNF416,RRN3,DIMT1,PPP1R15A,CDC6,ZNF184,SIRT1,XBP1,HMOX1,PHF5A,SNAPC1,ALKBH1,NFKBIA,AGO2,BRF2,RIPK2,RELB,ERF,NAMPT,SERPINE1,SETX,RASD1,NFKB1,PRDM4,CSRNP2,GCLC,MDFI,CEBPZ,DLX2,PRDM2,RGS2,ELL2,RHOQ,ATAD2B,ELF1,EGR1,AHR,EGR2,SNAI1,EREG,IRF1,INSIG2,C3,FOSB,PLAGL2,NR1D1,ZNF317,ZNF10,TICAM1,LIF,DLL4,FXR2,EGLN3,MKNK2,PBX4,RAF1,MED17,SAFB2,GDF15,JUND,SESN2,PPIL4,RARA…
GO:0006807	nitrogen compound metabolic process	980	8349	0.11	1.42e-21	9606.ENSP00000013125,9606.ENSP00000035307,9606.ENSP00000040738,9606.ENSP00000053468,9606.ENSP00000157600,9606.ENSP00000158771,9606.ENSP00000161006,9606.ENSP00000164227,9606.ENSP00000166139,9606.ENSP00000170564,9606.ENSP00000171111,9606.ENSP00000185150,9606.ENSP00000196489,9606.ENSP00000198767,9606.ENSP00000199320,9606.ENSP00000200453,9606.ENSP00000209728,9606.ENSP00000210444,9606.ENSP00000211936,…	MAP4K5,CHPF2,BOD1L1,MRPS10,LMCD1,DERL2,PRSS22,BCL3,FSTL3,GPATCH1,KEAP1,ERLEC1,ZNF416,RRN3,DIMT1,PPP1R15A,CDC6,NANS,ZNF184,SIRT1,PDXP,XBP1,RTCB,JOSD1,HMOX1,PHF5A,BRD1,SNAPC1,ALKBH1,NFKBIA,CSTF1,CHMP4B,GLA,PSMD7,AGO2,BRF2,RIPK2,GSR,RELB,SGTA,ERF,NAMPT,FKBP14,SETX,PPIF,NFKB1,PDHX,PRDM4,CSRNP2,FGFR1OP2,GCLC,BYSL,HARS2,HBEGF,KLHL18,ODC1,CEBPZ,DLX2,MSH6,PRDM2,SLC19A2,FBXO30,RNF103,ABCG2,ELL2,DDX55,RHOQ…
GO:0008152	metabolic process	1088	9569	0.1	4.63e-21	9606.ENSP00000009041,9606.ENSP00000013125,9606.ENSP00000035307,9606.ENSP00000040738,9606.ENSP00000053468,9606.ENSP00000075120,9606.ENSP00000157600,9606.ENSP00000158771,9606.ENSP00000161006,9606.ENSP00000164227,9606.ENSP00000166139,9606.ENSP00000170564,9606.ENSP00000171111,9606.ENSP00000179259,9606.ENSP00000185150,9606.ENSP00000196489,9606.ENSP00000198767,9606.ENSP00000199320,9606.ENSP00000200453,…	STARD3NL,MAP4K5,CHPF2,BOD1L1,MRPS10,SLC2A3,LMCD1,DERL2,PRSS22,BCL3,FSTL3,GPATCH1,KEAP1,C12orf5,ERLEC1,ZNF416,RRN3,DIMT1,PPP1R15A,CDC6,NANS,ZNF184,SIRT1,PDXP,XBP1,RTCB,JOSD1,HMOX1,PHF5A,BRD1,SNAPC1,ALKBH1,NFKBIA,CSTF1,CHMP4B,GLA,PSMD7,VPS18,AGO2,BRF2,RIPK2,MTMR9,GSR,DHDH,RELB,SGTA,ERF,NAMPT,FKBP14,SETX,PPIF,NFKB1,PDHX,PRDM4,CSRNP2,CYP27B1,FGFR1OP2,GCLC,BYSL,HARS2,HBEGF,BNIP1,KLHL18,ODC1,CEBPZ,DLX2…
GO:0071704	organic substance metabolic process	1049	9135	0.1	4.63e-21	9606.ENSP00000009041,9606.ENSP00000013125,9606.ENSP00000035307,9606.ENSP00000040738,9606.ENSP00000053468,9606.ENSP00000075120,9606.ENSP00000157600,9606.ENSP00000158771,9606.ENSP00000161006,9606.ENSP00000164227,9606.ENSP00000166139,9606.ENSP00000170564,9606.ENSP00000171111,9606.ENSP00000179259,9606.ENSP00000185150,9606.ENSP00000196489,9606.ENSP00000198767,9606.ENSP00000199320,9606.ENSP00000200453,…	STARD3NL,MAP4K5,CHPF2,BOD1L1,MRPS10,SLC2A3,LMCD1,DERL2,PRSS22,BCL3,FSTL3,GPATCH1,KEAP1,C12orf5,ERLEC1,ZNF416,RRN3,DIMT1,PPP1R15A,CDC6,NANS,ZNF184,SIRT1,PDXP,XBP1,RTCB,JOSD1,HMOX1,PHF5A,BRD1,SNAPC1,ALKBH1,NFKBIA,CSTF1,CHMP4B,GLA,PSMD7,AGO2,BRF2,RIPK2,MTMR9,GSR,DHDH,RELB,SGTA,ERF,NAMPT,FKBP14,SETX,PPIF,NFKB1,PDHX,PRDM4,CSRNP2,CYP27B1,FGFR1OP2,GCLC,BYSL,HARS2,HBEGF,KLHL18,ODC1,CEBPZ,DLX2,MSH6,PRDM2,…
GO:0044238	primary metabolic process	1015	8808	0.1	3.05e-20	9606.ENSP00000009041,9606.ENSP00000013125,9606.ENSP00000035307,9606.ENSP00000040738,9606.ENSP00000053468,9606.ENSP00000075120,9606.ENSP00000157600,9606.ENSP00000158771,9606.ENSP00000161006,9606.ENSP00000164227,9606.ENSP00000166139,9606.ENSP00000170564,9606.ENSP00000171111,9606.ENSP00000185150,9606.ENSP00000196489,9606.ENSP00000198767,9606.ENSP00000199320,9606.ENSP00000200453,9606.ENSP00000209728,…	STARD3NL,MAP4K5,CHPF2,BOD1L1,MRPS10,SLC2A3,LMCD1,DERL2,PRSS22,BCL3,FSTL3,GPATCH1,KEAP1,ERLEC1,ZNF416,RRN3,DIMT1,PPP1R15A,CDC6,NANS,ZNF184,SIRT1,PDXP,XBP1,RTCB,JOSD1,PHF5A,BRD1,SNAPC1,ALKBH1,NFKBIA,CSTF1,CHMP4B,GLA,PSMD7,AGO2,BRF2,RIPK2,MTMR9,GSR,DHDH,RELB,SGTA,ERF,NAMPT,FKBP14,SETX,PPIF,NFKB1,PDHX,PRDM4,CSRNP2,CYP27B1,FGFR1OP2,GCLC,BYSL,HARS2,HBEGF,KLHL18,ODC1,CEBPZ,DLX2,MSH6,PRDM2,FBXO30,RNF103,…
GO:0009893	positive regulation of metabolic process	469	3280	0.2	5.68e-20	9606.ENSP00000013125,9606.ENSP00000056217,9606.ENSP00000164133,9606.ENSP00000164227,9606.ENSP00000166139,9606.ENSP00000171111,9606.ENSP00000179259,9606.ENSP00000198767,9606.ENSP00000199320,9606.ENSP00000200453,9606.ENSP00000209728,9606.ENSP00000212015,9606.ENSP00000215631,9606.ENSP00000216037,9606.ENSP00000216117,9606.ENSP00000216252,9606.ENSP00000216797,9606.ENSP00000220325,9606.ENSP00000220592,…	MAP4K5,ARHGEF5,PPP2R5B,BCL3,FSTL3,KEAP1,C12orf5,RRN3,DIMT1,PPP1R15A,CDC6,SIRT1,GADD45B,XBP1,HMOX1,PHF5A,NFKBIA,EHD4,AGO2,RIPK2,MTMR9,RELB,SGTA,NAMPT,SERPINE1,SETX,NFKB1,PRDM4,CSRNP2,CYP27B1,GCLC,GUCA1B,HBEGF,CEBPZ,DLX2,MSH6,PRDM2,RHOQ,ATAD2B,ELF1,EGR1,AHR,EGR2,SNAI1,EREG,IRF1,INSIG2,C3,FOSB,PLAGL2,NR1D1,TICAM1,LIF,DLL4,EGLN3,PBX4,RAF1,MED17,GDF15,JUND,SESN2,RARA,KDM6B,JAG1,MED10,IRAK2,EDEM1,ADAM1…
GO:0010604	positive regulation of macromolecule metabolic process	445	3081	0.2	1.88e-19	9606.ENSP00000013125,9606.ENSP00000056217,9606.ENSP00000164133,9606.ENSP00000164227,9606.ENSP00000166139,9606.ENSP00000171111,9606.ENSP00000179259,9606.ENSP00000198767,9606.ENSP00000199320,9606.ENSP00000200453,9606.ENSP00000209728,9606.ENSP00000212015,9606.ENSP00000215631,9606.ENSP00000216037,9606.ENSP00000216117,9606.ENSP00000216252,9606.ENSP00000216797,9606.ENSP00000220325,9606.ENSP00000220592,…	MAP4K5,ARHGEF5,PPP2R5B,BCL3,FSTL3,KEAP1,C12orf5,RRN3,DIMT1,PPP1R15A,CDC6,SIRT1,GADD45B,XBP1,HMOX1,PHF5A,NFKBIA,EHD4,AGO2,RIPK2,RELB,SGTA,NAMPT,SERPINE1,SETX,NFKB1,PRDM4,CSRNP2,GCLC,HBEGF,CEBPZ,DLX2,MSH6,PRDM2,RHOQ,ATAD2B,ELF1,EGR1,AHR,EGR2,SNAI1,EREG,IRF1,INSIG2,C3,FOSB,PLAGL2,NR1D1,TICAM1,LIF,DLL4,EGLN3,PBX4,RAF1,MED17,GDF15,JUND,SESN2,RARA,KDM6B,JAG1,MED10,IRAK2,EDEM1,ADAM19,TBX3,AKIRIN2,RIPK1,…
GO:0016070	RNA metabolic process	482	3430	0.19	2.7e-19	9606.ENSP00000157600,9606.ENSP00000164227,9606.ENSP00000166139,9606.ENSP00000170564,9606.ENSP00000171111,9606.ENSP00000196489,9606.ENSP00000198767,9606.ENSP00000199320,9606.ENSP00000211936,9606.ENSP00000212015,9606.ENSP00000216037,9606.ENSP00000216038,9606.ENSP00000216252,9606.ENSP00000216294,9606.ENSP00000216489,9606.ENSP00000217109,9606.ENSP00000220592,9606.ENSP00000220659,9606.ENSP00000221452,…	LMCD1,BCL3,FSTL3,GPATCH1,KEAP1,ZNF416,RRN3,DIMT1,ZNF184,SIRT1,XBP1,RTCB,PHF5A,SNAPC1,ALKBH1,CSTF1,AGO2,BRF2,RELB,ERF,SETX,NFKB1,PRDM4,CSRNP2,BYSL,HARS2,CEBPZ,DLX2,PRDM2,ELL2,DDX55,ELF1,EGR1,AHR,EGR2,MPHOSPH10,EREG,IRF1,FOSB,PLAGL2,NR1D1,ZNF317,ZNF10,PBX4,DHX29,MED17,SAFB2,JUND,ZCCHC9,RARA,THAP1,RRP8,IGHMBP2,MED10,MBD2,BHLHE40,PRPF38A,TBX3,BACH2,AKIRIN2,PREB,RORA,ZNF430,LPIN2,UTP6,LHX5,ADNP2,TRIM3…
GO:0051173	positive regulation of nitrogen compound metabolic process	428	2946	0.2	5.59e-19	9606.ENSP00000013125,9606.ENSP00000056217,9606.ENSP00000164133,9606.ENSP00000164227,9606.ENSP00000166139,9606.ENSP00000171111,9606.ENSP00000179259,9606.ENSP00000198767,9606.ENSP00000199320,9606.ENSP00000200453,9606.ENSP00000209728,9606.ENSP00000212015,9606.ENSP00000215631,9606.ENSP00000216037,9606.ENSP00000216117,9606.ENSP00000216252,9606.ENSP00000216797,9606.ENSP00000220325,9606.ENSP00000220592,…	MAP4K5,ARHGEF5,PPP2R5B,BCL3,FSTL3,KEAP1,C12orf5,RRN3,DIMT1,PPP1R15A,CDC6,SIRT1,GADD45B,XBP1,HMOX1,PHF5A,NFKBIA,EHD4,AGO2,RIPK2,RELB,SGTA,NAMPT,SERPINE1,SETX,NFKB1,PRDM4,CSRNP2,GCLC,GUCA1B,HBEGF,CEBPZ,DLX2,MSH6,PRDM2,RHOQ,ATAD2B,ELF1,EGR1,AHR,EGR2,SNAI1,EREG,IRF1,INSIG2,C3,FOSB,PLAGL2,NR1D1,TICAM1,LIF,EGLN3,PBX4,RAF1,MED17,GDF15,JUND,SESN2,RARA,KDM6B,JAG1,MED10,IRAK2,EDEM1,TBX3,AKIRIN2,RIPK1,SDCBP…
GO:0031325	positive regulation of cellular metabolic process	440	3060	0.2	6.92e-19	9606.ENSP00000013125,9606.ENSP00000056217,9606.ENSP00000164133,9606.ENSP00000164227,9606.ENSP00000166139,9606.ENSP00000171111,9606.ENSP00000179259,9606.ENSP00000198767,9606.ENSP00000199320,9606.ENSP00000200453,9606.ENSP00000209728,9606.ENSP00000212015,9606.ENSP00000215631,9606.ENSP00000216037,9606.ENSP00000216117,9606.ENSP00000216252,9606.ENSP00000216797,9606.ENSP00000220325,9606.ENSP00000220592,…	MAP4K5,ARHGEF5,PPP2R5B,BCL3,FSTL3,KEAP1,C12orf5,RRN3,DIMT1,PPP1R15A,CDC6,SIRT1,GADD45B,XBP1,HMOX1,PHF5A,NFKBIA,EHD4,AGO2,RIPK2,MTMR9,RELB,SGTA,NAMPT,SERPINE1,SETX,NFKB1,PRDM4,CSRNP2,GCLC,GUCA1B,HBEGF,CEBPZ,DLX2,MSH6,PRDM2,RHOQ,ATAD2B,ELF1,EGR1,AHR,EGR2,SNAI1,EREG,IRF1,INSIG2,C3,FOSB,PLAGL2,NR1D1,TICAM1,LIF,EGLN3,PBX4,RAF1,MED17,GDF15,JUND,SESN2,RARA,KDM6B,JAG1,MED10,IRAK2,EDEM1,TBX3,AKIRIN2,RIPK1…
GO:0006357	regulation of transcription by RNA polymerase II	389	2633	0.21	5.4e-18	9606.ENSP00000157600,9606.ENSP00000164133,9606.ENSP00000164227,9606.ENSP00000166139,9606.ENSP00000196489,9606.ENSP00000211936,9606.ENSP00000212015,9606.ENSP00000216037,9606.ENSP00000216117,9606.ENSP00000216797,9606.ENSP00000220592,9606.ENSP00000220751,9606.ENSP00000221452,9606.ENSP00000222329,9606.ENSP00000222553,9606.ENSP00000223095,9606.ENSP00000224140,9606.ENSP00000226574,9606.ENSP00000228437,…	LMCD1,PPP2R5B,BCL3,FSTL3,ZNF416,ZNF184,SIRT1,XBP1,HMOX1,NFKBIA,AGO2,RIPK2,RELB,ERF,NAMPT,SERPINE1,SETX,NFKB1,PRDM4,CSRNP2,MDFI,CEBPZ,DLX2,PRDM2,RHOQ,ATAD2B,ELF1,EGR1,AHR,EGR2,SNAI1,IRF1,INSIG2,FOSB,PLAGL2,NR1D1,ZNF317,ZNF10,LIF,DLL4,EGLN3,PBX4,RAF1,MED17,SAFB2,GDF15,JUND,SESN2,PPIL4,RARA,THAP1,DNAJB1,KDM6B,JAG1,MED10,MBD2,BHLHE40,TBX3,BACH2,AKIRIN2,RIPK1,USP2,RORA,ZNF430,LPIN2,LHX5,ADNP2,TRIM37,N…
GO:0010467	gene expression	507	3733	0.17	8.26e-18	9606.ENSP00000053468,9606.ENSP00000157600,9606.ENSP00000164227,9606.ENSP00000166139,9606.ENSP00000170564,9606.ENSP00000171111,9606.ENSP00000196489,9606.ENSP00000198767,9606.ENSP00000199320,9606.ENSP00000211936,9606.ENSP00000212015,9606.ENSP00000216037,9606.ENSP00000216038,9606.ENSP00000216252,9606.ENSP00000216294,9606.ENSP00000216489,9606.ENSP00000217109,9606.ENSP00000220592,9606.ENSP00000220659,…	MRPS10,LMCD1,BCL3,FSTL3,GPATCH1,KEAP1,ZNF416,RRN3,DIMT1,ZNF184,SIRT1,XBP1,RTCB,PHF5A,SNAPC1,ALKBH1,CSTF1,AGO2,BRF2,RIPK2,RELB,ERF,SETX,NFKB1,PRDM4,CSRNP2,BYSL,HARS2,CEBPZ,DLX2,PRDM2,ELL2,ELF1,EGR1,AHR,EGR2,MPHOSPH10,EREG,IRF1,FOSB,PLAGL2,NR1D1,ZNF317,ZNF10,PBX4,DHX29,MED17,SAFB2,JUND,ZCCHC9,RARA,THAP1,RRP8,NXT1,IGHMBP2,MED10,EIF2S1,MBD2,BHLHE40,PRPF38A,TBX3,BACH2,AKIRIN2,PREB,RORA,ZNF430,LPIN2,UT…
GO:0006351	transcription, DNA-templated	380	2569	0.21	1.37e-17	9606.ENSP00000157600,9606.ENSP00000164227,9606.ENSP00000166139,9606.ENSP00000171111,9606.ENSP00000196489,9606.ENSP00000198767,9606.ENSP00000211936,9606.ENSP00000212015,9606.ENSP00000216037,9606.ENSP00000216252,9606.ENSP00000216294,9606.ENSP00000217109,9606.ENSP00000220592,9606.ENSP00000220659,9606.ENSP00000221452,9606.ENSP00000222329,9606.ENSP00000224140,9606.ENSP00000226574,9606.ENSP00000228437,…	LMCD1,BCL3,FSTL3,KEAP1,ZNF416,RRN3,ZNF184,SIRT1,XBP1,PHF5A,SNAPC1,CSTF1,AGO2,BRF2,RELB,ERF,SETX,NFKB1,PRDM4,CSRNP2,CEBPZ,DLX2,PRDM2,ELL2,ELF1,EGR1,AHR,EGR2,EREG,IRF1,FOSB,PLAGL2,NR1D1,ZNF317,ZNF10,PBX4,MED17,SAFB2,JUND,ZCCHC9,RARA,THAP1,RRP8,IGHMBP2,MED10,MBD2,BHLHE40,TBX3,BACH2,AKIRIN2,PREB,RORA,ZNF430,LPIN2,LHX5,ADNP2,TRIM37,ELL,EPC1,MED15,BRD4,MED26,ARID3A,CCNT2,ARID4B,MXD1,FOSL2,SOX30,LEF1,AF…
GO:0043412	macromolecule modification	448	3197	0.19	1.91e-17	9606.ENSP00000013125,9606.ENSP00000158771,9606.ENSP00000166139,9606.ENSP00000171111,9606.ENSP00000199320,9606.ENSP00000200453,9606.ENSP00000212015,9606.ENSP00000215904,9606.ENSP00000216039,9606.ENSP00000216267,9606.ENSP00000216489,9606.ENSP00000216797,9606.ENSP00000219313,9606.ENSP00000220751,9606.ENSP00000222803,9606.ENSP00000224140,9606.ENSP00000225174,9606.ENSP00000226574,9606.ENSP00000228437,…	MAP4K5,DERL2,FSTL3,KEAP1,DIMT1,PPP1R15A,SIRT1,PDXP,JOSD1,BRD1,ALKBH1,NFKBIA,PSMD7,RIPK2,FKBP14,SETX,PPIF,NFKB1,PRDM4,FGFR1OP2,HBEGF,KLHL18,PRDM2,FBXO30,RNF103,DUSP1,ALG5,DUSP4,KALRN,EGR2,RNF11,EREG,C3,WNK4,FBXL12,SDF2L1,LIF,EGLN3,MKNK2,RAF1,PPIL4,RARA,ILKAP,KDM6B,USPL1,MED10,BTG1,RNF122,EIF2S1,MBD2,IRAK2,EDEM1,BACH2,COG3,RIPK1,USP2,DCUN1D5,THBS1,TTLL7,PSMD11,NAA25,MAPK6,PIK3C3,MMD,WIPI1,TRIM37,CF…
GO:0048518	positive regulation of biological process	680	5459	0.14	2.89e-17	9606.ENSP00000013125,9606.ENSP00000056217,9606.ENSP00000157600,9606.ENSP00000158771,9606.ENSP00000164133,9606.ENSP00000164227,9606.ENSP00000166139,9606.ENSP00000171111,9606.ENSP00000179259,9606.ENSP00000198767,9606.ENSP00000199320,9606.ENSP00000200453,9606.ENSP00000202556,9606.ENSP00000209728,9606.ENSP00000212015,9606.ENSP00000215631,9606.ENSP00000215904,9606.ENSP00000216037,9606.ENSP00000216117,…	MAP4K5,ARHGEF5,LMCD1,DERL2,PPP2R5B,BCL3,FSTL3,KEAP1,C12orf5,RRN3,DIMT1,PPP1R15A,PPP1R13B,CDC6,SIRT1,GADD45B,PDXP,XBP1,HMOX1,PHF5A,SOS2,BDKRB1,NFKBIA,CHMP4B,EHD4,AGO2,RIPK2,MTMR9,RELB,SGTA,NAMPT,SERPINE1,SETX,PPIF,NFKB1,PRDM4,CSRNP2,CYP27B1,CLEC4A,GCLC,GUCA1B,HBEGF,TUSC2,ODC1,CEBPZ,DLX2,MSH6,PRDM2,RGS2,RHOQ,ATAD2B,DUSP1,ELF1,EGR1,KALRN,AHR,EGR2,SNAI1,EREG,IRF1,INSIG2,TNFSF9,C3,FOSB,PLAGL2,NR1D1,TI…
GO:0006464	cellular protein modification process	425	2999	0.19	3.86e-17	9606.ENSP00000013125,9606.ENSP00000158771,9606.ENSP00000166139,9606.ENSP00000171111,9606.ENSP00000200453,9606.ENSP00000212015,9606.ENSP00000215904,9606.ENSP00000216039,9606.ENSP00000216267,9606.ENSP00000216797,9606.ENSP00000219313,9606.ENSP00000220751,9606.ENSP00000222803,9606.ENSP00000224140,9606.ENSP00000225174,9606.ENSP00000226574,9606.ENSP00000228437,9606.ENSP00000229395,9606.ENSP00000230990,…	MAP4K5,DERL2,FSTL3,KEAP1,PPP1R15A,SIRT1,PDXP,JOSD1,BRD1,NFKBIA,PSMD7,RIPK2,FKBP14,SETX,PPIF,NFKB1,PRDM4,FGFR1OP2,HBEGF,KLHL18,PRDM2,FBXO30,RNF103,DUSP1,ALG5,DUSP4,KALRN,EGR2,RNF11,EREG,C3,WNK4,FBXL12,SDF2L1,LIF,EGLN3,MKNK2,RAF1,PPIL4,RARA,ILKAP,KDM6B,USPL1,MED10,BTG1,RNF122,EIF2S1,IRAK2,EDEM1,BACH2,COG3,RIPK1,USP2,DCUN1D5,THBS1,TTLL7,PSMD11,NAA25,MAPK6,PIK3C3,MMD,WIPI1,TRIM37,CFAP20,CCNE1,MAP3K8,…
GO:0050794	regulation of cellular process	1144	10484	0.08	1.49e-16	9606.ENSP00000013125,9606.ENSP00000014914,9606.ENSP00000033079,9606.ENSP00000056217,9606.ENSP00000064780,9606.ENSP00000157600,9606.ENSP00000158771,9606.ENSP00000164024,9606.ENSP00000164133,9606.ENSP00000164227,9606.ENSP00000166139,9606.ENSP00000171111,9606.ENSP00000179259,9606.ENSP00000185150,9606.ENSP00000196489,9606.ENSP00000198767,9606.ENSP00000199320,9606.ENSP00000200453,9606.ENSP00000202556,…	MAP4K5,GPRC5A,FAM13B,ARHGEF5,RELT,LMCD1,DERL2,CELSR3,PPP2R5B,BCL3,FSTL3,KEAP1,C12orf5,ERLEC1,ZNF416,RRN3,DIMT1,PPP1R15A,PPP1R13B,CDC6,ZNF184,SIRT1,GADD45B,PDXP,XBP1,HMOX1,PHF5A,SNAPC1,SOS2,ALKBH1,BDKRB1,NFKBIA,TPD52L2,CHMP4B,GLA,EHD4,RHOV,VPS18,AGO2,BRF2,RIPK2,MTMR9,GSR,RELB,SGTA,ERF,NAMPT,FKBP14,SERPINE1,SETX,PPIF,TBC1D12,RASD1,AKAP10,NFKB1,IL10RA,PRDM4,CSRNP2,CYP27B1,CLEC4A,GCLC,MDFI,GUCA1B,HBE…
GO:0044267	cellular protein metabolic process	484	3603	0.17	5.1e-16	9606.ENSP00000013125,9606.ENSP00000053468,9606.ENSP00000157600,9606.ENSP00000158771,9606.ENSP00000166139,9606.ENSP00000171111,9606.ENSP00000185150,9606.ENSP00000200453,9606.ENSP00000212015,9606.ENSP00000215904,9606.ENSP00000216037,9606.ENSP00000216039,9606.ENSP00000216267,9606.ENSP00000216797,9606.ENSP00000217402,9606.ENSP00000219313,9606.ENSP00000220592,9606.ENSP00000220751,9606.ENSP00000221566,…	MAP4K5,MRPS10,LMCD1,DERL2,FSTL3,KEAP1,ERLEC1,PPP1R15A,SIRT1,PDXP,XBP1,JOSD1,BRD1,NFKBIA,CHMP4B,PSMD7,AGO2,RIPK2,SGTA,FKBP14,SETX,PPIF,NFKB1,PRDM4,FGFR1OP2,HARS2,HBEGF,KLHL18,PRDM2,FBXO30,RNF103,DUSP1,ALG5,DUSP4,KALRN,EGR2,RNF11,EREG,C3,NR1D1,WNK4,FBXL12,SDF2L1,LIF,DNAJB9,EGLN3,MKNK2,DHX29,RAF1,PPIL4,RARA,ILKAP,H3F3B,KDM6B,IGHMBP2,USPL1,MED10,BTG1,RNF122,EIF2S1,IRAK2,EDEM1,BACH2,COG3,KIAA0368,RIPK…
GO:0034645	cellular macromolecule biosynthetic process	474	3518	0.17	8.06e-16	9606.ENSP00000035307,9606.ENSP00000040738,9606.ENSP00000053468,9606.ENSP00000157600,9606.ENSP00000164227,9606.ENSP00000166139,9606.ENSP00000171111,9606.ENSP00000196489,9606.ENSP00000198767,9606.ENSP00000209728,9606.ENSP00000211936,9606.ENSP00000212015,9606.ENSP00000216037,9606.ENSP00000216252,9606.ENSP00000216294,9606.ENSP00000217109,9606.ENSP00000220592,9606.ENSP00000220659,9606.ENSP00000221452,…	CHPF2,BOD1L1,MRPS10,LMCD1,BCL3,FSTL3,KEAP1,ZNF416,RRN3,CDC6,ZNF184,SIRT1,XBP1,PHF5A,SNAPC1,CSTF1,AGO2,BRF2,RELB,ERF,SETX,NFKB1,PRDM4,CSRNP2,HARS2,CEBPZ,DLX2,PRDM2,ELL2,ELF1,ALG5,EGR1,AHR,EGR2,EREG,IRF1,FOSB,PLAGL2,NR1D1,ZNF317,ZNF10,SDF2L1,PBX4,DHX29,MED17,SAFB2,JUND,GRWD1,ZCCHC9,RARA,THAP1,RRP8,IGHMBP2,MED10,EIF2S1,MBD2,BHLHE40,TBX3,BACH2,AKIRIN2,COG3,PREB,RORA,ZNF430,LPIN2,LHX5,PIK3C3,WIPI1,ADN…
GO:0090304	nucleic acid metabolic process	517	3941	0.16	1.37e-15	9606.ENSP00000040738,9606.ENSP00000157600,9606.ENSP00000164227,9606.ENSP00000166139,9606.ENSP00000170564,9606.ENSP00000171111,9606.ENSP00000196489,9606.ENSP00000198767,9606.ENSP00000199320,9606.ENSP00000209728,9606.ENSP00000211936,9606.ENSP00000212015,9606.ENSP00000216037,9606.ENSP00000216038,9606.ENSP00000216252,9606.ENSP00000216294,9606.ENSP00000216489,9606.ENSP00000217109,9606.ENSP00000220592,…	BOD1L1,LMCD1,BCL3,FSTL3,GPATCH1,KEAP1,ZNF416,RRN3,DIMT1,CDC6,ZNF184,SIRT1,XBP1,RTCB,PHF5A,SNAPC1,ALKBH1,CSTF1,AGO2,BRF2,RELB,ERF,SETX,NFKB1,PRDM4,CSRNP2,BYSL,HARS2,CEBPZ,DLX2,MSH6,PRDM2,ELL2,DDX55,ELF1,EGR1,AHR,EGR2,MPHOSPH10,EREG,IRF1,FOSB,PLAGL2,NR1D1,ZNF317,ZNF10,PBX4,DHX29,MED17,SAFB2,JUND,SESN2,GRWD1,ZCCHC9,RARA,THAP1,RRP8,IGHMBP2,MED10,MBD2,BHLHE40,PRPF38A,TBX3,BACH2,AKIRIN2,PREB,N4BP2,RORA…
GO:0009059	macromolecule biosynthetic process	477	3576	0.17	3.18e-15	9606.ENSP00000035307,9606.ENSP00000040738,9606.ENSP00000053468,9606.ENSP00000157600,9606.ENSP00000164227,9606.ENSP00000166139,9606.ENSP00000171111,9606.ENSP00000196489,9606.ENSP00000198767,9606.ENSP00000209728,9606.ENSP00000211936,9606.ENSP00000212015,9606.ENSP00000216037,9606.ENSP00000216252,9606.ENSP00000216294,9606.ENSP00000217109,9606.ENSP00000220592,9606.ENSP00000220659,9606.ENSP00000221452,…	CHPF2,BOD1L1,MRPS10,LMCD1,BCL3,FSTL3,KEAP1,ZNF416,RRN3,CDC6,ZNF184,SIRT1,XBP1,PHF5A,SNAPC1,CSTF1,AGO2,BRF2,RELB,ERF,SETX,NFKB1,PRDM4,CSRNP2,HARS2,CEBPZ,DLX2,PRDM2,ELL2,ELF1,ALG5,EGR1,AHR,EGR2,EREG,IRF1,FOSB,PLAGL2,NR1D1,ZNF317,ZNF10,SDF2L1,PBX4,DHX29,MED17,SAFB2,JUND,GRWD1,ZCCHC9,RARA,THAP1,RRP8,IGHMBP2,MED10,EIF2S1,MBD2,BHLHE40,TBX3,BACH2,AKIRIN2,COG3,PREB,RORA,ZNF430,LPIN2,LHX5,PIK3C3,WIPI1,ADN…
GO:0050789	regulation of biological process	1188	11116	0.07	1.26e-14	9606.ENSP00000013125,9606.ENSP00000014914,9606.ENSP00000033079,9606.ENSP00000056217,9606.ENSP00000064780,9606.ENSP00000157600,9606.ENSP00000158771,9606.ENSP00000164024,9606.ENSP00000164133,9606.ENSP00000164227,9606.ENSP00000166139,9606.ENSP00000171111,9606.ENSP00000179259,9606.ENSP00000185150,9606.ENSP00000196489,9606.ENSP00000198767,9606.ENSP00000199320,9606.ENSP00000200453,9606.ENSP00000202556,…	MAP4K5,GPRC5A,FAM13B,ARHGEF5,RELT,LMCD1,DERL2,CELSR3,PPP2R5B,BCL3,FSTL3,KEAP1,C12orf5,ERLEC1,ZNF416,RRN3,DIMT1,PPP1R15A,PPP1R13B,CDC6,ZNF184,SIRT1,GADD45B,PDXP,XBP1,HMOX1,PHF5A,SNAPC1,SOS2,ALKBH1,BDKRB1,NFKBIA,TPD52L2,CHMP4B,KCND1,GLA,EHD4,RHOV,VPS18,AGO2,BRF2,RIPK2,MTMR9,GSR,RELB,SGTA,ERF,NAMPT,FKBP14,SERPINE1,SETX,PPIF,TBC1D12,RASD1,AKAP10,NFKB1,IL10RA,PRDM4,CSRNP2,CYP27B1,CLEC4A,GCLC,MDFI,GUCA…
GO:0048522	positive regulation of cellular process	609	4898	0.14	1.31e-14	9606.ENSP00000013125,9606.ENSP00000056217,9606.ENSP00000157600,9606.ENSP00000158771,9606.ENSP00000164133,9606.ENSP00000164227,9606.ENSP00000166139,9606.ENSP00000171111,9606.ENSP00000179259,9606.ENSP00000198767,9606.ENSP00000199320,9606.ENSP00000200453,9606.ENSP00000202556,9606.ENSP00000209728,9606.ENSP00000212015,9606.ENSP00000215631,9606.ENSP00000215904,9606.ENSP00000216037,9606.ENSP00000216117,…	MAP4K5,ARHGEF5,LMCD1,DERL2,PPP2R5B,BCL3,FSTL3,KEAP1,C12orf5,RRN3,DIMT1,PPP1R15A,PPP1R13B,CDC6,SIRT1,GADD45B,PDXP,XBP1,HMOX1,PHF5A,SOS2,BDKRB1,NFKBIA,EHD4,AGO2,RIPK2,MTMR9,RELB,SGTA,NAMPT,SERPINE1,SETX,PPIF,NFKB1,PRDM4,CSRNP2,CYP27B1,GCLC,GUCA1B,HBEGF,ODC1,CEBPZ,DLX2,MSH6,PRDM2,RGS2,RHOQ,ATAD2B,DUSP1,ELF1,EGR1,KALRN,AHR,EGR2,SNAI1,EREG,IRF1,INSIG2,TNFSF9,C3,FOSB,PLAGL2,NR1D1,TICAM1,LIF,DLL4,EGLN3,…
GO:0051254	positive regulation of RNA metabolic process	255	1596	0.25	1.77e-14	9606.ENSP00000164133,9606.ENSP00000164227,9606.ENSP00000166139,9606.ENSP00000198767,9606.ENSP00000199320,9606.ENSP00000212015,9606.ENSP00000216037,9606.ENSP00000216252,9606.ENSP00000216797,9606.ENSP00000220592,9606.ENSP00000220751,9606.ENSP00000221452,9606.ENSP00000222553,9606.ENSP00000223095,9606.ENSP00000224140,9606.ENSP00000226574,9606.ENSP00000228437,9606.ENSP00000228515,9606.ENSP00000234170,…	PPP2R5B,BCL3,FSTL3,RRN3,DIMT1,SIRT1,XBP1,PHF5A,NFKBIA,AGO2,RIPK2,RELB,NAMPT,SERPINE1,SETX,NFKB1,PRDM4,CSRNP2,CEBPZ,DLX2,PRDM2,RHOQ,ATAD2B,ELF1,EGR1,AHR,EGR2,SNAI1,IRF1,INSIG2,FOSB,PLAGL2,NR1D1,LIF,PBX4,RAF1,MED17,JUND,SESN2,RARA,KDM6B,JAG1,MED10,TBX3,AKIRIN2,RIPK1,RORA,LPIN2,LHX5,NLRC5,CCNE1,ELL,C19orf10,EPC1,IL1A,BRD4,MED26,ARID3A,ACVR1,SLC9A1,CCNT2,ARID4B,FOSL2,LEF1,SRF,CREM,GAL,GTF2H1,GMEB2,TE…
GO:0010628	positive regulation of gene expression	280	1826	0.23	4.63e-14	9606.ENSP00000164133,9606.ENSP00000164227,9606.ENSP00000166139,9606.ENSP00000198767,9606.ENSP00000199320,9606.ENSP00000200453,9606.ENSP00000212015,9606.ENSP00000216037,9606.ENSP00000216252,9606.ENSP00000216797,9606.ENSP00000220592,9606.ENSP00000220751,9606.ENSP00000221452,9606.ENSP00000222553,9606.ENSP00000223095,9606.ENSP00000224140,9606.ENSP00000226574,9606.ENSP00000228437,9606.ENSP00000228515,…	PPP2R5B,BCL3,FSTL3,RRN3,DIMT1,PPP1R15A,SIRT1,XBP1,PHF5A,NFKBIA,AGO2,RIPK2,RELB,NAMPT,SERPINE1,SETX,NFKB1,PRDM4,CSRNP2,CEBPZ,DLX2,PRDM2,RHOQ,ATAD2B,ELF1,EGR1,AHR,EGR2,SNAI1,IRF1,INSIG2,C3,FOSB,PLAGL2,NR1D1,TICAM1,LIF,DLL4,PBX4,RAF1,MED17,JUND,SESN2,RARA,KDM6B,JAG1,MED10,ADAM19,TBX3,AKIRIN2,RIPK1,THBS1,RORA,LPIN2,LHX5,TMED2,NLRC5,CCNE1,ELL,C19orf10,EPC1,IL1A,BRD4,ARID3A,ACVR1,SLC9A1,CCNT2,ARID4B,FO…
GO:0034654	nucleobase-containing compound biosynthetic process	412	3031	0.18	7.8e-14	9606.ENSP00000157600,9606.ENSP00000164227,9606.ENSP00000166139,9606.ENSP00000171111,9606.ENSP00000196489,9606.ENSP00000198767,9606.ENSP00000210444,9606.ENSP00000211936,9606.ENSP00000212015,9606.ENSP00000216037,9606.ENSP00000216252,9606.ENSP00000216294,9606.ENSP00000217109,9606.ENSP00000220592,9606.ENSP00000220659,9606.ENSP00000221452,9606.ENSP00000222329,9606.ENSP00000222553,9606.ENSP00000224140,…	LMCD1,BCL3,FSTL3,KEAP1,ZNF416,RRN3,NANS,ZNF184,SIRT1,XBP1,PHF5A,SNAPC1,CSTF1,AGO2,BRF2,RELB,ERF,NAMPT,SETX,NFKB1,PDHX,PRDM4,CSRNP2,CEBPZ,DLX2,PRDM2,ELL2,ELF1,EGR1,AHR,EGR2,EREG,IRF1,FOSB,PLAGL2,NR1D1,ZNF317,ZNF10,PBX4,MED17,SAFB2,JUND,ZCCHC9,RARA,THAP1,RRP8,IGHMBP2,MED10,MBD2,BHLHE40,TBX3,BACH2,AKIRIN2,PREB,RORA,ZNF430,LPIN2,LHX5,ADNP2,TRIM37,ELL,EPC1,UFD1L,MED15,BRD4,MED26,ARID3A,CCNT2,ARID4B,MX…
GO:0065007	biological regulation	1237	11740	0.06	7.8e-14	9606.ENSP00000009041,9606.ENSP00000013125,9606.ENSP00000014914,9606.ENSP00000033079,9606.ENSP00000056217,9606.ENSP00000064780,9606.ENSP00000157600,9606.ENSP00000158771,9606.ENSP00000164024,9606.ENSP00000164133,9606.ENSP00000164227,9606.ENSP00000166139,9606.ENSP00000171111,9606.ENSP00000179259,9606.ENSP00000185150,9606.ENSP00000196489,9606.ENSP00000198767,9606.ENSP00000199320,9606.ENSP00000200453,…	STARD3NL,MAP4K5,GPRC5A,FAM13B,ARHGEF5,RELT,LMCD1,DERL2,CELSR3,PPP2R5B,BCL3,FSTL3,KEAP1,C12orf5,ERLEC1,ZNF416,RRN3,DIMT1,PPP1R15A,PPP1R13B,CDC6,ZNF184,SIRT1,GADD45B,PDXP,XBP1,HMOX1,PHF5A,SNAPC1,SOS2,ALKBH1,BDKRB1,NFKBIA,TPD52L2,CHMP4B,KCND1,GLA,EHD4,RHOV,VPS18,AGO2,BRF2,RIPK2,MTMR9,GSR,RELB,SGTA,ERF,NAMPT,FKBP14,SERPINE1,SETX,PPIF,TBC1D12,RASD1,AKAP10,NFKB1,IL10RA,PRDM4,CSRNP2,CYP27B1,CLEC4A,GCLC,…
GO:1903508	positive regulation of nucleic acid-templated transcription	243	1520	0.25	9.26e-14	9606.ENSP00000164133,9606.ENSP00000164227,9606.ENSP00000166139,9606.ENSP00000198767,9606.ENSP00000212015,9606.ENSP00000216037,9606.ENSP00000216252,9606.ENSP00000216797,9606.ENSP00000220592,9606.ENSP00000220751,9606.ENSP00000221452,9606.ENSP00000222553,9606.ENSP00000223095,9606.ENSP00000224140,9606.ENSP00000226574,9606.ENSP00000228437,9606.ENSP00000228515,9606.ENSP00000234170,9606.ENSP00000234198,…	PPP2R5B,BCL3,FSTL3,RRN3,SIRT1,XBP1,PHF5A,NFKBIA,AGO2,RIPK2,RELB,NAMPT,SERPINE1,SETX,NFKB1,PRDM4,CSRNP2,CEBPZ,DLX2,PRDM2,RHOQ,ATAD2B,ELF1,EGR1,AHR,EGR2,SNAI1,IRF1,INSIG2,FOSB,PLAGL2,NR1D1,LIF,PBX4,RAF1,MED17,JUND,SESN2,RARA,KDM6B,JAG1,MED10,TBX3,AKIRIN2,RIPK1,RORA,LPIN2,LHX5,NLRC5,CCNE1,ELL,C19orf10,EPC1,IL1A,BRD4,MED26,ARID3A,ACVR1,SLC9A1,CCNT2,ARID4B,FOSL2,LEF1,SRF,CREM,GAL,GTF2H1,GMEB2,TEF,TRIP…
GO:0045935	positive regulation of nucleobase-containing compound metabolic process	272	1770	0.23	9.7e-14	9606.ENSP00000164133,9606.ENSP00000164227,9606.ENSP00000166139,9606.ENSP00000179259,9606.ENSP00000198767,9606.ENSP00000199320,9606.ENSP00000212015,9606.ENSP00000216037,9606.ENSP00000216252,9606.ENSP00000216797,9606.ENSP00000220592,9606.ENSP00000220751,9606.ENSP00000221452,9606.ENSP00000222553,9606.ENSP00000223095,9606.ENSP00000224140,9606.ENSP00000226574,9606.ENSP00000228437,9606.ENSP00000228515,…	PPP2R5B,BCL3,FSTL3,C12orf5,RRN3,DIMT1,SIRT1,XBP1,PHF5A,NFKBIA,AGO2,RIPK2,RELB,NAMPT,SERPINE1,SETX,NFKB1,PRDM4,CSRNP2,GUCA1B,CEBPZ,DLX2,MSH6,PRDM2,RHOQ,ATAD2B,ELF1,EGR1,AHR,EGR2,SNAI1,EREG,IRF1,INSIG2,FOSB,PLAGL2,NR1D1,LIF,PBX4,RAF1,MED17,JUND,SESN2,RARA,KDM6B,JAG1,MED10,TBX3,AKIRIN2,RIPK1,RORA,LPIN2,LHX5,NLRC5,CCNE1,ELL,C19orf10,EPC1,IL1A,BRD4,MED26,ARID3A,ACVR1,SLC9A1,CCNT2,ARID4B,FOSL2,LEF1,SRF…
GO:0018130	heterocycle biosynthetic process	418	3095	0.17	1.02e-13	9606.ENSP00000157600,9606.ENSP00000164227,9606.ENSP00000166139,9606.ENSP00000171111,9606.ENSP00000196489,9606.ENSP00000198767,9606.ENSP00000210444,9606.ENSP00000211936,9606.ENSP00000212015,9606.ENSP00000216037,9606.ENSP00000216252,9606.ENSP00000216294,9606.ENSP00000217109,9606.ENSP00000220592,9606.ENSP00000220659,9606.ENSP00000221452,9606.ENSP00000222329,9606.ENSP00000222553,9606.ENSP00000224140,…	LMCD1,BCL3,FSTL3,KEAP1,ZNF416,RRN3,NANS,ZNF184,SIRT1,XBP1,PHF5A,SNAPC1,CSTF1,AGO2,BRF2,RELB,ERF,NAMPT,SETX,NFKB1,PDHX,PRDM4,CSRNP2,CEBPZ,DLX2,PRDM2,ELL2,ELF1,EGR1,AHR,EGR2,EREG,IRF1,FOSB,PLAGL2,NR1D1,ZNF317,ZNF10,PBX4,MED17,SAFB2,JUND,ZCCHC9,RARA,THAP1,RRP8,IGHMBP2,MED10,MBD2,BHLHE40,TBX3,BACH2,AKIRIN2,PREB,RORA,ZNF430,LPIN2,COX10,LHX5,ADNP2,TRIM37,ELL,EPC1,UFD1L,MED15,BRD4,MED26,ARID3A,CCNT2,ARI…
GO:0019438	aromatic compound biosynthetic process	418	3100	0.17	1.27e-13	9606.ENSP00000157600,9606.ENSP00000164227,9606.ENSP00000166139,9606.ENSP00000171111,9606.ENSP00000196489,9606.ENSP00000198767,9606.ENSP00000210444,9606.ENSP00000211936,9606.ENSP00000212015,9606.ENSP00000216037,9606.ENSP00000216252,9606.ENSP00000216294,9606.ENSP00000217109,9606.ENSP00000220592,9606.ENSP00000220659,9606.ENSP00000221452,9606.ENSP00000222329,9606.ENSP00000222553,9606.ENSP00000224140,…	LMCD1,BCL3,FSTL3,KEAP1,ZNF416,RRN3,NANS,ZNF184,SIRT1,XBP1,PHF5A,SNAPC1,CSTF1,AGO2,BRF2,RELB,ERF,NAMPT,SETX,NFKB1,PDHX,PRDM4,CSRNP2,CEBPZ,DLX2,PRDM2,ELL2,ELF1,EGR1,AHR,EGR2,EREG,IRF1,FOSB,PLAGL2,NR1D1,ZNF317,ZNF10,PBX4,MED17,SAFB2,JUND,ZCCHC9,RARA,THAP1,RRP8,IGHMBP2,MED10,MBD2,BHLHE40,TBX3,BACH2,AKIRIN2,PREB,RORA,ZNF430,LPIN2,COX10,LHX5,ADNP2,TRIM37,ELL,EPC1,UFD1L,MED15,BRD4,MED26,ARID3A,CCNT2,ARI…
GO:0045893	positive regulation of transcription, DNA-templated	232	1435	0.25	1.43e-13	9606.ENSP00000164133,9606.ENSP00000164227,9606.ENSP00000166139,9606.ENSP00000198767,9606.ENSP00000212015,9606.ENSP00000216037,9606.ENSP00000216252,9606.ENSP00000216797,9606.ENSP00000220592,9606.ENSP00000220751,9606.ENSP00000221452,9606.ENSP00000222553,9606.ENSP00000223095,9606.ENSP00000224140,9606.ENSP00000226574,9606.ENSP00000228437,9606.ENSP00000228515,9606.ENSP00000234170,9606.ENSP00000234198,…	PPP2R5B,BCL3,FSTL3,RRN3,SIRT1,XBP1,PHF5A,NFKBIA,AGO2,RIPK2,RELB,NAMPT,SERPINE1,SETX,NFKB1,PRDM4,CSRNP2,CEBPZ,DLX2,PRDM2,RHOQ,ATAD2B,ELF1,EGR1,AHR,EGR2,SNAI1,IRF1,INSIG2,FOSB,PLAGL2,NR1D1,LIF,PBX4,RAF1,MED17,JUND,SESN2,RARA,KDM6B,JAG1,MED10,TBX3,AKIRIN2,RIPK1,RORA,LPIN2,LHX5,NLRC5,CCNE1,ELL,C19orf10,EPC1,IL1A,BRD4,ARID3A,ACVR1,SLC9A1,CCNT2,ARID4B,FOSL2,LEF1,SRF,CREM,GAL,GTF2H1,TEF,CRTC3,TAF4B,MEF2…
GO:0009987	cellular process	1476	14652	0.05	1.59e-13	9606.ENSP00000009041,9606.ENSP00000013125,9606.ENSP00000014914,9606.ENSP00000033079,9606.ENSP00000035307,9606.ENSP00000040738,9606.ENSP00000053468,9606.ENSP00000056217,9606.ENSP00000064780,9606.ENSP00000075120,9606.ENSP00000157600,9606.ENSP00000158771,9606.ENSP00000163416,9606.ENSP00000164024,9606.ENSP00000164133,9606.ENSP00000164227,9606.ENSP00000166139,9606.ENSP00000170564,9606.ENSP00000171111,…	STARD3NL,MAP4K5,GPRC5A,FAM13B,CHPF2,BOD1L1,MRPS10,ARHGEF5,RELT,SLC2A3,LMCD1,DERL2,GOLGA5,CELSR3,PPP2R5B,BCL3,FSTL3,GPATCH1,KEAP1,C12orf5,ERLEC1,OSTM1,ZNF416,RRN3,DIMT1,PPP1R15A,PDRG1,PPP1R13B,CDC6,NANS,ZNF184,SIRT1,GADD45B,PDXP,XBP1,RTCB,JOSD1,HMOX1,PHF5A,BRD1,SNAPC1,SOS2,ALKBH1,BDKRB1,NFKBIA,CSTF1,CHMP4B,KCND1,GLA,PSMD7,EHD4,RHOV,VPS18,AGO2,BRF2,RIPK2,MTMR9,GSR,DHDH,RELB,SGTA,ERF,BET1,NAMPT,FKBP…
GO:0032268	regulation of cellular protein metabolic process	351	2486	0.19	1.7e-13	9606.ENSP00000013125,9606.ENSP00000014914,9606.ENSP00000056217,9606.ENSP00000158771,9606.ENSP00000164024,9606.ENSP00000164133,9606.ENSP00000164227,9606.ENSP00000171111,9606.ENSP00000185150,9606.ENSP00000200453,9606.ENSP00000209728,9606.ENSP00000212015,9606.ENSP00000215631,9606.ENSP00000216037,9606.ENSP00000216489,9606.ENSP00000216629,9606.ENSP00000216797,9606.ENSP00000220325,9606.ENSP00000220592,…	MAP4K5,GPRC5A,ARHGEF5,DERL2,CELSR3,PPP2R5B,BCL3,KEAP1,ERLEC1,PPP1R15A,CDC6,SIRT1,GADD45B,XBP1,ALKBH1,BDKRB1,NFKBIA,EHD4,AGO2,RIPK2,SGTA,SERPINE1,NFKB1,GCLC,HBEGF,RGS2,DUSP1,EGR1,DUSP4,EREG,C3,TICAM1,LIF,FXR2,EGLN3,MKNK2,RAF1,GDF15,CEP85,SESN2,PPIL4,RARA,EIF2S1,IRAK2,EDEM1,AKIRIN2,RIPK1,SDCBP,DCUN1D5,THBS1,BCL2L10,CCND2,SEMA7A,MMD,N4BP1,TRAF4,CCNE1,C19orf10,MAP3K8,BRD4,BIRC3,ACVR1,MAP4K3,CBL,CCNT2…
GO:1901362	organic cyclic compound biosynthetic process	431	3230	0.17	1.7e-13	9606.ENSP00000009041,9606.ENSP00000157600,9606.ENSP00000164227,9606.ENSP00000166139,9606.ENSP00000171111,9606.ENSP00000196489,9606.ENSP00000198767,9606.ENSP00000210444,9606.ENSP00000211936,9606.ENSP00000212015,9606.ENSP00000216037,9606.ENSP00000216252,9606.ENSP00000216294,9606.ENSP00000217109,9606.ENSP00000220592,9606.ENSP00000220659,9606.ENSP00000221452,9606.ENSP00000222329,9606.ENSP00000222553,…	STARD3NL,LMCD1,BCL3,FSTL3,KEAP1,ZNF416,RRN3,NANS,ZNF184,SIRT1,XBP1,PHF5A,SNAPC1,CSTF1,AGO2,BRF2,RELB,ERF,NAMPT,SETX,NFKB1,PDHX,PRDM4,CSRNP2,CYP27B1,CEBPZ,DLX2,PRDM2,ELL2,ELF1,EGR1,AHR,EGR2,EREG,IRF1,INSIG2,FOSB,PLAGL2,NR1D1,ZNF317,ZNF10,PBX4,MED17,SAFB2,JUND,ZCCHC9,RARA,THAP1,RRP8,IGHMBP2,MED10,MBD2,BHLHE40,TBX3,BACH2,AKIRIN2,PREB,MSMO1,RORA,ZNF430,LPIN2,COX10,LHX5,ADNP2,TRIM37,ELL,EPC1,UFD1L,MED…
GO:0051246	regulation of protein metabolic process	370	2668	0.18	2.46e-13	9606.ENSP00000013125,9606.ENSP00000014914,9606.ENSP00000056217,9606.ENSP00000158771,9606.ENSP00000164024,9606.ENSP00000164133,9606.ENSP00000164227,9606.ENSP00000171111,9606.ENSP00000185150,9606.ENSP00000200453,9606.ENSP00000209728,9606.ENSP00000212015,9606.ENSP00000215631,9606.ENSP00000216037,9606.ENSP00000216117,9606.ENSP00000216489,9606.ENSP00000216629,9606.ENSP00000216797,9606.ENSP00000220325,…	MAP4K5,GPRC5A,ARHGEF5,DERL2,CELSR3,PPP2R5B,BCL3,KEAP1,ERLEC1,PPP1R15A,CDC6,SIRT1,GADD45B,XBP1,HMOX1,ALKBH1,BDKRB1,NFKBIA,EHD4,AGO2,RIPK2,SGTA,SERPINE1,NFKB1,GCLC,HBEGF,ODC1,RGS2,DUSP1,EGR1,DUSP4,EREG,IRF1,C3,TICAM1,LIF,FXR2,EGLN3,MKNK2,RAF1,GDF15,CEP85,SESN2,PPIL4,RARA,EIF2S1,IRAK2,EDEM1,AKIRIN2,RIPK1,SDCBP,DCUN1D5,THBS1,BCL2L10,CCND2,LIPG,SEMA7A,MMD,N4BP1,TRAF4,CCNE1,C19orf10,MAP3K8,IL1A,BRD4,BI…
GO:0033554	cellular response to stress	241	1553	0.23	2.02e-12	9606.ENSP00000013125,9606.ENSP00000040738,9606.ENSP00000158771,9606.ENSP00000164133,9606.ENSP00000164227,9606.ENSP00000179259,9606.ENSP00000185150,9606.ENSP00000200453,9606.ENSP00000212015,9606.ENSP00000216037,9606.ENSP00000216117,9606.ENSP00000216489,9606.ENSP00000216797,9606.ENSP00000220659,9606.ENSP00000220751,9606.ENSP00000221130,9606.ENSP00000221452,9606.ENSP00000221566,9606.ENSP00000222803,…	MAP4K5,BOD1L1,DERL2,PPP2R5B,BCL3,C12orf5,ERLEC1,PPP1R15A,SIRT1,XBP1,HMOX1,ALKBH1,NFKBIA,BRF2,RIPK2,GSR,RELB,SGTA,FKBP14,SETX,PPIF,NFKB1,MSH6,RNF103,EGR1,INSIG2,PITHD1,SDF2L1,DNAJB9,EGLN3,SESN2,DNAJB1,RRP8,KDM6B,IGHMBP2,EIF2S1,IRAK2,EDEM1,TBX3,KIAA0368,RIPK1,THBS1,BCL2L10,PREB,RORA,FAF2,PIK3C3,WIPI1,ADNP2,C19orf10,MAP3K8,UFD1L,IL1A,BRD4,ARID3A,MAP4K3,SLC9A1,CBL,MUL1,ICAM1,MAP3K13,SRF,GET4,MAPKAP1,…
GO:0048519	negative regulation of biological process	600	4953	0.13	2.83e-12	9606.ENSP00000014914,9606.ENSP00000157600,9606.ENSP00000158771,9606.ENSP00000164133,9606.ENSP00000164227,9606.ENSP00000166139,9606.ENSP00000171111,9606.ENSP00000179259,9606.ENSP00000185150,9606.ENSP00000198767,9606.ENSP00000200453,9606.ENSP00000202556,9606.ENSP00000209728,9606.ENSP00000212015,9606.ENSP00000215631,9606.ENSP00000216037,9606.ENSP00000216117,9606.ENSP00000216489,9606.ENSP00000216629,…	GPRC5A,LMCD1,DERL2,PPP2R5B,BCL3,FSTL3,KEAP1,C12orf5,ERLEC1,RRN3,PPP1R15A,PPP1R13B,CDC6,SIRT1,GADD45B,XBP1,HMOX1,ALKBH1,BDKRB1,NFKBIA,CHMP4B,GLA,AGO2,RIPK2,MTMR9,RELB,SGTA,ERF,SERPINE1,SETX,PPIF,RASD1,NFKB1,CSRNP2,CYP27B1,CLEC4A,GCLC,MDFI,HBEGF,BNIP1,TUSC2,DLX2,MSH6,RGS2,RHOQ,ATAD2B,DUSP1,ELF1,EGR1,DUSP4,KALRN,AHR,ORMDL2,SNAI1,MPHOSPH10,EREG,IRF1,INSIG2,C3,FOSB,NR1D1,WNK4,TICAM1,LIF,DNAJB9,DLL4,FX…
GO:0044271	cellular nitrogen compound biosynthetic process	455	3528	0.15	3.35e-12	9606.ENSP00000053468,9606.ENSP00000157600,9606.ENSP00000164227,9606.ENSP00000166139,9606.ENSP00000171111,9606.ENSP00000196489,9606.ENSP00000198767,9606.ENSP00000210444,9606.ENSP00000211936,9606.ENSP00000212015,9606.ENSP00000216037,9606.ENSP00000216252,9606.ENSP00000216294,9606.ENSP00000217109,9606.ENSP00000220592,9606.ENSP00000220659,9606.ENSP00000221452,9606.ENSP00000222329,9606.ENSP00000222553,…	MRPS10,LMCD1,BCL3,FSTL3,KEAP1,ZNF416,RRN3,NANS,ZNF184,SIRT1,XBP1,PHF5A,SNAPC1,CSTF1,AGO2,BRF2,RELB,ERF,NAMPT,SETX,NFKB1,PDHX,PRDM4,CSRNP2,GCLC,HARS2,ODC1,CEBPZ,DLX2,PRDM2,ELL2,ELF1,EGR1,AHR,EGR2,EREG,IRF1,FOSB,PLAGL2,NR1D1,ZNF317,ZNF10,PBX4,DHX29,MED17,SAFB2,JUND,ZCCHC9,RARA,THAP1,RRP8,IGHMBP2,MED10,EIF2S1,MBD2,BHLHE40,TBX3,BACH2,AKIRIN2,PREB,RORA,ZNF430,LPIN2,COX10,LHX5,ADNP2,TRIM37,ELL,EPC1,UFD…
GO:0010557	positive regulation of macromolecule biosynthetic process	263	1758	0.22	4.42e-12	9606.ENSP00000164133,9606.ENSP00000164227,9606.ENSP00000166139,9606.ENSP00000198767,9606.ENSP00000200453,9606.ENSP00000212015,9606.ENSP00000216037,9606.ENSP00000216117,9606.ENSP00000216252,9606.ENSP00000216797,9606.ENSP00000220592,9606.ENSP00000220751,9606.ENSP00000221452,9606.ENSP00000222553,9606.ENSP00000223095,9606.ENSP00000224140,9606.ENSP00000226574,9606.ENSP00000228437,9606.ENSP00000228515,…	PPP2R5B,BCL3,FSTL3,RRN3,PPP1R15A,SIRT1,XBP1,HMOX1,PHF5A,NFKBIA,AGO2,RIPK2,RELB,NAMPT,SERPINE1,SETX,NFKB1,PRDM4,CSRNP2,CEBPZ,DLX2,PRDM2,RHOQ,ATAD2B,ELF1,EGR1,AHR,EGR2,SNAI1,EREG,IRF1,INSIG2,FOSB,PLAGL2,NR1D1,TICAM1,LIF,PBX4,RAF1,MED17,JUND,SESN2,RARA,KDM6B,JAG1,MED10,TBX3,AKIRIN2,RIPK1,THBS1,RORA,LPIN2,LHX5,NLRC5,CCNE1,ELL,C19orf10,EPC1,IL1A,BRD4,MED26,ARID3A,ACVR1,SLC9A1,CCNT2,ARID4B,FOSL2,LEF1,S…
GO:0031328	positive regulation of cellular biosynthetic process	273	1846	0.21	4.42e-12	9606.ENSP00000164133,9606.ENSP00000164227,9606.ENSP00000166139,9606.ENSP00000198767,9606.ENSP00000200453,9606.ENSP00000212015,9606.ENSP00000216037,9606.ENSP00000216117,9606.ENSP00000216252,9606.ENSP00000216797,9606.ENSP00000220592,9606.ENSP00000220751,9606.ENSP00000221452,9606.ENSP00000222553,9606.ENSP00000223095,9606.ENSP00000224140,9606.ENSP00000226574,9606.ENSP00000228437,9606.ENSP00000228515,…	PPP2R5B,BCL3,FSTL3,RRN3,PPP1R15A,SIRT1,XBP1,HMOX1,PHF5A,NFKBIA,AGO2,RIPK2,RELB,NAMPT,SERPINE1,SETX,NFKB1,PRDM4,CSRNP2,GUCA1B,CEBPZ,DLX2,PRDM2,RHOQ,ATAD2B,ELF1,EGR1,AHR,EGR2,SNAI1,EREG,IRF1,INSIG2,FOSB,PLAGL2,NR1D1,TICAM1,LIF,PBX4,RAF1,MED17,JUND,SESN2,RARA,KDM6B,JAG1,MED10,TBX3,AKIRIN2,RIPK1,THBS1,RORA,LPIN2,LHX5,NLRC5,CCNE1,ELL,C19orf10,EPC1,IL1A,BRD4,MED26,ARID3A,ACVR1,SLC9A1,CCNT2,ARID4B,FOSL2…
GO:0045944	positive regulation of transcription by RNA polymerase II	186	1104	0.27	4.55e-12	9606.ENSP00000164133,9606.ENSP00000164227,9606.ENSP00000166139,9606.ENSP00000212015,9606.ENSP00000216037,9606.ENSP00000216797,9606.ENSP00000220592,9606.ENSP00000220751,9606.ENSP00000221452,9606.ENSP00000222553,9606.ENSP00000223095,9606.ENSP00000224140,9606.ENSP00000226574,9606.ENSP00000228437,9606.ENSP00000228515,9606.ENSP00000234170,9606.ENSP00000234198,9606.ENSP00000235372,9606.ENSP00000238738,…	PPP2R5B,BCL3,FSTL3,SIRT1,XBP1,NFKBIA,AGO2,RIPK2,RELB,NAMPT,SERPINE1,SETX,NFKB1,PRDM4,CSRNP2,CEBPZ,DLX2,PRDM2,RHOQ,ATAD2B,ELF1,EGR1,AHR,EGR2,IRF1,INSIG2,FOSB,PLAGL2,LIF,RAF1,MED17,JUND,SESN2,RARA,KDM6B,JAG1,MED10,AKIRIN2,RIPK1,RORA,LPIN2,NLRC5,ELL,C19orf10,EPC1,IL1A,BRD4,ARID3A,ACVR1,SLC9A1,CCNT2,ARID4B,FOSL2,LEF1,SRF,CREM,GAL,GTF2H1,TEF,CRTC3,TAF4B,MEF2D,CSRNP1,EAF2,CDKN2B,PPRC1,NIPBL,FLCN,ZSCAN2…
GO:0031324	negative regulation of cellular metabolic process	341	2463	0.18	4.95e-12	9606.ENSP00000014914,9606.ENSP00000157600,9606.ENSP00000158771,9606.ENSP00000164227,9606.ENSP00000179259,9606.ENSP00000185150,9606.ENSP00000200453,9606.ENSP00000209728,9606.ENSP00000212015,9606.ENSP00000215631,9606.ENSP00000216037,9606.ENSP00000216117,9606.ENSP00000216629,9606.ENSP00000217402,9606.ENSP00000218516,9606.ENSP00000220592,9606.ENSP00000221086,9606.ENSP00000221452,9606.ENSP00000221566,…	GPRC5A,LMCD1,DERL2,BCL3,C12orf5,ERLEC1,PPP1R15A,CDC6,SIRT1,GADD45B,XBP1,HMOX1,BDKRB1,CHMP4B,GLA,AGO2,MTMR9,RELB,SGTA,ERF,SERPINE1,PPIF,RASD1,NFKB1,CSRNP2,CYP27B1,GCLC,MDFI,HBEGF,DLX2,MSH6,RGS2,DUSP1,EGR1,DUSP4,AHR,ORMDL2,SNAI1,MPHOSPH10,EREG,IRF1,INSIG2,C3,FOSB,NR1D1,LIF,DLL4,FXR2,KIAA1244,RAF1,JUND,CEP85,SESN2,ZCCHC9,RARA,THAP1,DNAJB1,RRP8,H3F3B,EIF2S1,MBD2,BHLHE40,TBX3,BACH2,AKIRIN2,SDCBP,USP2,…
GO:0019538	protein metabolic process	522	4194	0.14	5.2e-12	9606.ENSP00000013125,9606.ENSP00000035307,9606.ENSP00000053468,9606.ENSP00000157600,9606.ENSP00000158771,9606.ENSP00000161006,9606.ENSP00000166139,9606.ENSP00000171111,9606.ENSP00000185150,9606.ENSP00000200453,9606.ENSP00000212015,9606.ENSP00000215904,9606.ENSP00000216037,9606.ENSP00000216039,9606.ENSP00000216267,9606.ENSP00000216797,9606.ENSP00000217402,9606.ENSP00000219313,9606.ENSP00000220592,…	MAP4K5,CHPF2,MRPS10,LMCD1,DERL2,PRSS22,FSTL3,KEAP1,ERLEC1,PPP1R15A,SIRT1,PDXP,XBP1,JOSD1,BRD1,NFKBIA,CHMP4B,PSMD7,AGO2,RIPK2,SGTA,FKBP14,SETX,PPIF,NFKB1,PRDM4,FGFR1OP2,HARS2,HBEGF,KLHL18,PRDM2,FBXO30,RNF103,DUSP1,ALG5,DUSP4,KALRN,EGR2,RNF11,EREG,C3,NR1D1,WNK4,FBXL12,SDF2L1,LIF,DNAJB9,EGLN3,MKNK2,DHX29,RAF1,NUMBL,PPIL4,RARA,ILKAP,H3F3B,KDM6B,IGHMBP2,USPL1,MED10,BTG1,RNF122,EIF2S1,IRAK2,EDEM1,ADAM1…
GO:0006366	transcription by RNA polymerase II	145	784	0.31	7.8e-12	9606.ENSP00000212015,9606.ENSP00000216037,9606.ENSP00000216294,9606.ENSP00000217109,9606.ENSP00000224140,9606.ENSP00000226574,9606.ENSP00000228437,9606.ENSP00000228515,9606.ENSP00000234170,9606.ENSP00000234198,9606.ENSP00000235372,9606.ENSP00000237853,9606.ENSP00000239882,9606.ENSP00000239938,9606.ENSP00000242057,9606.ENSP00000242480,9606.ENSP00000245414,9606.ENSP00000245919,9606.ENSP00000246229,…	SIRT1,XBP1,SNAPC1,CSTF1,SETX,NFKB1,PRDM4,CSRNP2,CEBPZ,DLX2,PRDM2,ELL2,ELF1,EGR1,AHR,EGR2,IRF1,FOSB,PLAGL2,NR1D1,PBX4,MED17,JUND,RARA,MED10,BACH2,RORA,ELL,MED15,MED26,ARID3A,CCNT2,FOSL2,LEF1,AFF4,SRF,GTF2H1,GMEB2,TEF,TRIP11,TAF4B,MEF2D,CSRNP1,EAF2,NRBF2,CCRN4L,GTF2E1,MED8,MED27,ZSCAN21,STAT5B,REL,MITF,KLF15,ICE1,NFIL3,PCF11,SNAPC4,RUNX1,JUNB,CEBPB,FOS,PPM1D,NR1D2,FOSL1,INTS6,PPARD,ELF4,TFE3,SUPT6H…
GO:0009891	positive regulation of biosynthetic process	275	1876	0.21	8.06e-12	9606.ENSP00000164133,9606.ENSP00000164227,9606.ENSP00000166139,9606.ENSP00000198767,9606.ENSP00000200453,9606.ENSP00000212015,9606.ENSP00000216037,9606.ENSP00000216117,9606.ENSP00000216252,9606.ENSP00000216797,9606.ENSP00000220592,9606.ENSP00000220751,9606.ENSP00000221452,9606.ENSP00000222553,9606.ENSP00000223095,9606.ENSP00000224140,9606.ENSP00000226574,9606.ENSP00000228437,9606.ENSP00000228515,…	PPP2R5B,BCL3,FSTL3,RRN3,PPP1R15A,SIRT1,XBP1,HMOX1,PHF5A,NFKBIA,AGO2,RIPK2,RELB,NAMPT,SERPINE1,SETX,NFKB1,PRDM4,CSRNP2,GUCA1B,CEBPZ,DLX2,PRDM2,RHOQ,ATAD2B,ELF1,EGR1,AHR,EGR2,SNAI1,EREG,IRF1,INSIG2,FOSB,PLAGL2,NR1D1,TICAM1,LIF,PBX4,RAF1,MED17,JUND,SESN2,RARA,KDM6B,JAG1,MED10,TBX3,AKIRIN2,RIPK1,THBS1,RORA,LPIN2,LHX5,NLRC5,CCNE1,ELL,C19orf10,EPC1,IL1A,BRD4,MED26,ARID3A,ACVR1,SLC9A1,CCNT2,ARID4B,FOSL2…
GO:0031399	regulation of protein modification process	260	1747	0.21	9.75e-12	9606.ENSP00000013125,9606.ENSP00000014914,9606.ENSP00000056217,9606.ENSP00000164024,9606.ENSP00000164133,9606.ENSP00000200453,9606.ENSP00000209728,9606.ENSP00000212015,9606.ENSP00000215631,9606.ENSP00000216037,9606.ENSP00000216629,9606.ENSP00000220325,9606.ENSP00000220751,9606.ENSP00000229416,9606.ENSP00000230990,9606.ENSP00000235382,9606.ENSP00000239223,9606.ENSP00000239938,9606.ENSP00000240100,…	MAP4K5,GPRC5A,ARHGEF5,CELSR3,PPP2R5B,PPP1R15A,CDC6,SIRT1,GADD45B,XBP1,BDKRB1,EHD4,RIPK2,GCLC,HBEGF,RGS2,DUSP1,EGR1,DUSP4,EREG,C3,TICAM1,LIF,RAF1,GDF15,CEP85,SESN2,PPIL4,IRAK2,RIPK1,SDCBP,DCUN1D5,THBS1,CCND2,SEMA7A,MMD,N4BP1,TRAF4,CCNE1,C19orf10,MAP3K8,BRD4,BIRC3,ACVR1,MAP4K3,CBL,CCNT2,MUL1,ALS2,RAPGEF2,DNAJC27,ICAM1,MAP3K13,ARRDC3,NRP1,MAPKAP1,GTF2H1,JDP2,ARRDC4,GAREM,AKAP8,FEM1A,DLC1,TNFRSF10B,C…
GO:0006139	nucleobase-containing compound metabolic process	556	4551	0.13	1.04e-11	9606.ENSP00000040738,9606.ENSP00000157600,9606.ENSP00000164227,9606.ENSP00000166139,9606.ENSP00000170564,9606.ENSP00000171111,9606.ENSP00000196489,9606.ENSP00000198767,9606.ENSP00000199320,9606.ENSP00000209728,9606.ENSP00000210444,9606.ENSP00000211936,9606.ENSP00000212015,9606.ENSP00000216037,9606.ENSP00000216038,9606.ENSP00000216252,9606.ENSP00000216294,9606.ENSP00000216489,9606.ENSP00000217109,…	BOD1L1,LMCD1,BCL3,FSTL3,GPATCH1,KEAP1,ZNF416,RRN3,DIMT1,CDC6,NANS,ZNF184,SIRT1,XBP1,RTCB,PHF5A,SNAPC1,ALKBH1,CSTF1,AGO2,BRF2,GSR,RELB,ERF,NAMPT,SETX,NFKB1,PDHX,PRDM4,CSRNP2,BYSL,HARS2,CEBPZ,DLX2,MSH6,PRDM2,ELL2,DDX55,RHOQ,ELF1,EGR1,AHR,EGR2,MPHOSPH10,EREG,IRF1,FOSB,PLAGL2,NR1D1,ZNF317,ZNF10,PBX4,DHX29,MED17,SAFB2,JUND,SESN2,GRWD1,ZCCHC9,RARA,THAP1,RRP8,IGHMBP2,MED10,MBD2,BHLHE40,PRPF38A,TBX3,BACH…
GO:0046483	heterocycle metabolic process	569	4716	0.12	3.73e-11	9606.ENSP00000040738,9606.ENSP00000157600,9606.ENSP00000164227,9606.ENSP00000166139,9606.ENSP00000170564,9606.ENSP00000171111,9606.ENSP00000196489,9606.ENSP00000198767,9606.ENSP00000199320,9606.ENSP00000209728,9606.ENSP00000210444,9606.ENSP00000211936,9606.ENSP00000212015,9606.ENSP00000215904,9606.ENSP00000216037,9606.ENSP00000216038,9606.ENSP00000216117,9606.ENSP00000216252,9606.ENSP00000216294,…	BOD1L1,LMCD1,BCL3,FSTL3,GPATCH1,KEAP1,ZNF416,RRN3,DIMT1,CDC6,NANS,ZNF184,SIRT1,PDXP,XBP1,RTCB,HMOX1,PHF5A,SNAPC1,ALKBH1,CSTF1,AGO2,BRF2,GSR,RELB,ERF,NAMPT,SETX,NFKB1,PDHX,PRDM4,CSRNP2,BYSL,HARS2,CEBPZ,DLX2,MSH6,PRDM2,SLC19A2,ABCG2,ELL2,DDX55,RHOQ,ELF1,EGR1,AHR,EGR2,MPHOSPH10,EREG,IRF1,FOSB,PLAGL2,NR1D1,ZNF317,ZNF10,PBX4,DHX29,MED17,SAFB2,JUND,SESN2,GRWD1,ZCCHC9,RARA,THAP1,RRP8,IGHMBP2,MED10,MBD2,…
GO:0009892	negative regulation of metabolic process	368	2762	0.17	4.32e-11	9606.ENSP00000014914,9606.ENSP00000157600,9606.ENSP00000158771,9606.ENSP00000164227,9606.ENSP00000179259,9606.ENSP00000185150,9606.ENSP00000200453,9606.ENSP00000209728,9606.ENSP00000212015,9606.ENSP00000215631,9606.ENSP00000216037,9606.ENSP00000216117,9606.ENSP00000216629,9606.ENSP00000217402,9606.ENSP00000218516,9606.ENSP00000220592,9606.ENSP00000221086,9606.ENSP00000221452,9606.ENSP00000221566,…	GPRC5A,LMCD1,DERL2,BCL3,C12orf5,ERLEC1,PPP1R15A,CDC6,SIRT1,GADD45B,XBP1,HMOX1,BDKRB1,CHMP4B,GLA,AGO2,MTMR9,RELB,SGTA,ERF,SERPINE1,PPIF,RASD1,NFKB1,CSRNP2,CYP27B1,GCLC,MDFI,HBEGF,DLX2,MSH6,RGS2,DUSP1,EGR1,DUSP4,AHR,ORMDL2,SNAI1,MPHOSPH10,EREG,IRF1,INSIG2,C3,FOSB,NR1D1,LIF,DLL4,FXR2,KIAA1244,RAF1,JUND,CEP85,SESN2,ZCCHC9,RARA,THAP1,DNAJB1,RRP8,H3F3B,EIF2S1,MBD2,BHLHE40,TBX3,BACH2,AKIRIN2,SDCBP,USP2,…
GO:0006725	cellular aromatic compound metabolic process	572	4754	0.12	4.82e-11	9606.ENSP00000040738,9606.ENSP00000157600,9606.ENSP00000164227,9606.ENSP00000166139,9606.ENSP00000170564,9606.ENSP00000171111,9606.ENSP00000196489,9606.ENSP00000198767,9606.ENSP00000199320,9606.ENSP00000209728,9606.ENSP00000210444,9606.ENSP00000211936,9606.ENSP00000212015,9606.ENSP00000215904,9606.ENSP00000216037,9606.ENSP00000216038,9606.ENSP00000216117,9606.ENSP00000216252,9606.ENSP00000216294,…	BOD1L1,LMCD1,BCL3,FSTL3,GPATCH1,KEAP1,ZNF416,RRN3,DIMT1,CDC6,NANS,ZNF184,SIRT1,PDXP,XBP1,RTCB,HMOX1,PHF5A,SNAPC1,ALKBH1,CSTF1,AGO2,BRF2,GSR,RELB,ERF,NAMPT,SETX,NFKB1,PDHX,PRDM4,CSRNP2,BYSL,HARS2,CEBPZ,DLX2,MSH6,PRDM2,SLC19A2,ABCG2,ELL2,DDX55,RHOQ,ELF1,EGR1,AHR,EGR2,MPHOSPH10,EREG,IRF1,FOSB,PLAGL2,NR1D1,ZNF317,ZNF10,PBX4,DHX29,MED17,SAFB2,JUND,SESN2,GRWD1,AOC2,ZCCHC9,RARA,THAP1,RRP8,IGHMBP2,MED10,…
GO:0010033	response to organic substance	372	2815	0.16	8.34e-11	9606.ENSP00000064780,9606.ENSP00000158771,9606.ENSP00000164133,9606.ENSP00000171111,9606.ENSP00000185150,9606.ENSP00000209728,9606.ENSP00000212015,9606.ENSP00000215904,9606.ENSP00000216037,9606.ENSP00000216117,9606.ENSP00000216629,9606.ENSP00000216797,9606.ENSP00000220325,9606.ENSP00000220592,9606.ENSP00000220751,9606.ENSP00000221452,9606.ENSP00000221566,9606.ENSP00000222553,9606.ENSP00000222803,…	RELT,DERL2,PPP2R5B,KEAP1,ERLEC1,CDC6,SIRT1,PDXP,XBP1,HMOX1,BDKRB1,NFKBIA,EHD4,AGO2,RIPK2,RELB,SGTA,NAMPT,FKBP14,SERPINE1,SETX,NFKB1,IL10RA,CYP27B1,RAB35,GCLC,RGS2,RNF103,RHOQ,DUSP1,EGR1,KALRN,AHR,EGR2,EREG,IRF1,INSIG2,TNFSF9,FOSB,NR1D1,TICAM1,SDF2L1,LIF,DNAJB9,DLL4,RAF1,MED17,MICB,GDF15,JUND,NUMBL,SESN2,RARA,DNAJB1,JAG1,BTG1,EIF2S1,MBD2,IRAK2,EDEM1,OASL,TRAFD1,AKIRIN2,RAB11FIP5,KIAA0368,TOR1B,RIP…
GO:0048523	negative regulation of cellular process	540	4454	0.13	9.9e-11	9606.ENSP00000014914,9606.ENSP00000157600,9606.ENSP00000158771,9606.ENSP00000164133,9606.ENSP00000164227,9606.ENSP00000166139,9606.ENSP00000179259,9606.ENSP00000185150,9606.ENSP00000198767,9606.ENSP00000200453,9606.ENSP00000202556,9606.ENSP00000209728,9606.ENSP00000212015,9606.ENSP00000215631,9606.ENSP00000216037,9606.ENSP00000216117,9606.ENSP00000216489,9606.ENSP00000216629,9606.ENSP00000216797,…	GPRC5A,LMCD1,DERL2,PPP2R5B,BCL3,FSTL3,C12orf5,ERLEC1,RRN3,PPP1R15A,PPP1R13B,CDC6,SIRT1,GADD45B,XBP1,HMOX1,ALKBH1,BDKRB1,NFKBIA,CHMP4B,GLA,AGO2,RIPK2,MTMR9,RELB,SGTA,ERF,SERPINE1,SETX,PPIF,RASD1,NFKB1,CSRNP2,CYP27B1,GCLC,MDFI,HBEGF,BNIP1,DLX2,MSH6,RGS2,ATAD2B,DUSP1,ELF1,EGR1,DUSP4,KALRN,AHR,ORMDL2,SNAI1,MPHOSPH10,EREG,IRF1,INSIG2,C3,FOSB,NR1D1,TICAM1,LIF,DNAJB9,DLL4,FXR2,KIAA1244,RAF1,GDF15,JUND,C…
GO:1901576	organic substance biosynthetic process	560	4656	0.12	1.04e-10	9606.ENSP00000009041,9606.ENSP00000035307,9606.ENSP00000040738,9606.ENSP00000053468,9606.ENSP00000157600,9606.ENSP00000164227,9606.ENSP00000166139,9606.ENSP00000171111,9606.ENSP00000196489,9606.ENSP00000198767,9606.ENSP00000209728,9606.ENSP00000210444,9606.ENSP00000211936,9606.ENSP00000212015,9606.ENSP00000216037,9606.ENSP00000216252,9606.ENSP00000216294,9606.ENSP00000217109,9606.ENSP00000220592,…	STARD3NL,CHPF2,BOD1L1,MRPS10,LMCD1,BCL3,FSTL3,KEAP1,ZNF416,RRN3,CDC6,NANS,ZNF184,SIRT1,XBP1,PHF5A,SNAPC1,CSTF1,AGO2,BRF2,MTMR9,RELB,ERF,NAMPT,SETX,NFKB1,PDHX,PRDM4,CSRNP2,CYP27B1,GCLC,HARS2,ODC1,CEBPZ,DLX2,PRDM2,ELL2,ELF1,ALG5,EGR1,AHR,EGR2,EREG,IRF1,INSIG2,FOSB,PLAGL2,NR1D1,ZNF317,ZNF10,SDF2L1,PBX4,DHX29,MED17,SAFB2,JUND,GRWD1,ZCCHC9,RARA,THAP1,RRP8,IGHMBP2,MED10,EIF2S1,MBD2,BHLHE40,TBX3,BACH2,A…
GO:0044249	cellular biosynthetic process	551	4567	0.12	1.07e-10	9606.ENSP00000009041,9606.ENSP00000035307,9606.ENSP00000040738,9606.ENSP00000053468,9606.ENSP00000157600,9606.ENSP00000164227,9606.ENSP00000166139,9606.ENSP00000171111,9606.ENSP00000196489,9606.ENSP00000198767,9606.ENSP00000209728,9606.ENSP00000210444,9606.ENSP00000211936,9606.ENSP00000212015,9606.ENSP00000216037,9606.ENSP00000216252,9606.ENSP00000216294,9606.ENSP00000217109,9606.ENSP00000220592,…	STARD3NL,CHPF2,BOD1L1,MRPS10,LMCD1,BCL3,FSTL3,KEAP1,ZNF416,RRN3,CDC6,NANS,ZNF184,SIRT1,XBP1,PHF5A,SNAPC1,CSTF1,AGO2,BRF2,MTMR9,RELB,ERF,NAMPT,SETX,NFKB1,PDHX,PRDM4,CSRNP2,CYP27B1,GCLC,HARS2,ODC1,CEBPZ,DLX2,PRDM2,ELL2,ELF1,ALG5,EGR1,AHR,EGR2,EREG,IRF1,FOSB,PLAGL2,NR1D1,ZNF317,ZNF10,SDF2L1,PBX4,DHX29,MED17,SAFB2,JUND,GRWD1,ZCCHC9,RARA,THAP1,RRP8,IGHMBP2,MED10,EIF2S1,MBD2,BHLHE40,TBX3,BACH2,AKIRIN2,…
GO:0010941	regulation of cell death	242	1638	0.21	1.46e-10	9606.ENSP00000013125,9606.ENSP00000056217,9606.ENSP00000064780,9606.ENSP00000164227,9606.ENSP00000179259,9606.ENSP00000198767,9606.ENSP00000202556,9606.ENSP00000212015,9606.ENSP00000215631,9606.ENSP00000216037,9606.ENSP00000216117,9606.ENSP00000216373,9606.ENSP00000216489,9606.ENSP00000216797,9606.ENSP00000217402,9606.ENSP00000220751,9606.ENSP00000223095,9606.ENSP00000224140,9606.ENSP00000225174,…	MAP4K5,ARHGEF5,RELT,BCL3,C12orf5,RRN3,PPP1R13B,SIRT1,GADD45B,XBP1,HMOX1,SOS2,ALKBH1,NFKBIA,CHMP4B,RIPK2,SERPINE1,SETX,PPIF,NFKB1,GCLC,BNIP1,DUSP1,EGR1,KALRN,SNAI1,PLAGL2,SDF2L1,EGLN3,RAF1,GDF15,JUND,RARA,BTG1,EIF2S1,TBX3,RIPK1,IER3,THBS1,BCL2L10,CCND2,ADNP2,TRAF4,ACIN1,C19orf10,MAP3K8,IL1A,BIRC3,ACVR1,MAP4K3,SLC9A1,CBL,MUL1,RAPGEF2,ICAM1,GOLPH3,LEF1,NRP1,GAL,NPC1,SIK1,RHOB,PLK2,DLC1,TNFRSF10B,PAK…
GO:0019220	regulation of phosphate metabolic process	244	1657	0.21	1.55e-10	9606.ENSP00000013125,9606.ENSP00000014914,9606.ENSP00000056217,9606.ENSP00000164024,9606.ENSP00000164133,9606.ENSP00000179259,9606.ENSP00000200453,9606.ENSP00000209728,9606.ENSP00000212015,9606.ENSP00000215631,9606.ENSP00000216037,9606.ENSP00000216629,9606.ENSP00000220325,9606.ENSP00000220751,9606.ENSP00000221086,9606.ENSP00000225174,9606.ENSP00000228515,9606.ENSP00000230361,9606.ENSP00000230990,…	MAP4K5,GPRC5A,ARHGEF5,CELSR3,PPP2R5B,C12orf5,PPP1R15A,CDC6,SIRT1,GADD45B,XBP1,BDKRB1,EHD4,RIPK2,MTMR9,PPIF,CSRNP2,GUCA1B,HBEGF,RGS2,DUSP1,EGR1,DUSP4,MPHOSPH10,EREG,C3,LIF,KIAA1244,RAF1,GDF15,CEP85,SESN2,PPIL4,ZCCHC9,IRAK2,RIPK1,SDCBP,THBS1,CCND2,SEMA7A,MMD,TRAF4,NLRC5,CCNE1,ELL,C19orf10,MAP3K8,BRD4,ACVR1,MAP4K3,CBL,CCNT2,MUL1,ALS2,RAPGEF2,DNAJC27,ICAM1,MAP3K13,NRP1,MAPKAP1,GTF2H1,GAREM,AKAP8,DLC1…
GO:1902531	regulation of intracellular signal transduction	256	1764	0.2	1.58e-10	9606.ENSP00000013125,9606.ENSP00000033079,9606.ENSP00000056217,9606.ENSP00000157600,9606.ENSP00000164133,9606.ENSP00000164227,9606.ENSP00000198767,9606.ENSP00000202556,9606.ENSP00000212015,9606.ENSP00000215631,9606.ENSP00000216037,9606.ENSP00000216373,9606.ENSP00000216797,9606.ENSP00000220507,9606.ENSP00000220751,9606.ENSP00000225174,9606.ENSP00000230990,9606.ENSP00000235382,9606.ENSP00000238738,…	MAP4K5,FAM13B,ARHGEF5,LMCD1,PPP2R5B,BCL3,RRN3,PPP1R13B,SIRT1,GADD45B,XBP1,SOS2,NFKBIA,RHOV,RIPK2,PPIF,HBEGF,RGS2,RHOQ,DUSP1,DUSP4,KALRN,SNAI1,EREG,PLAGL2,TICAM1,LIF,KIAA1244,RAF1,GDF15,SESN2,IRAK2,RIPK1,IER3,SDCBP,THBS1,BCL2L10,ARHGAP29,RORA,SEMA7A,TRAF4,C19orf10,MAP3K8,UFD1L,BRD4,BIRC3,MAP4K3,SLC9A1,CBL,MUL1,ALS2,RAPGEF2,DNAJC27,ICAM1,MAP3K13,GOLPH3,ARRDC3,NRP1,MAPKAP1,RHOF,CRTC3,TAF4B,GAREM,RHO…
GO:0006986	response to unfolded protein	50	153	0.56	1.8e-10	9606.ENSP00000158771,9606.ENSP00000164133,9606.ENSP00000216037,9606.ENSP00000222803,9606.ENSP00000249356,9606.ENSP00000254322,9606.ENSP00000256383,9606.ENSP00000256497,9606.ENSP00000259339,9606.ENSP00000260356,9606.ENSP00000260643,9606.ENSP00000261942,9606.ENSP00000262139,9606.ENSP00000262947,9606.ENSP00000299767,9606.ENSP00000306512,9606.ENSP00000307235,9606.ENSP00000307260,9606.ENSP00000314615,…	DERL2,PPP2R5B,XBP1,FKBP14,DNAJB9,DNAJB1,EIF2S1,EDEM1,TOR1B,THBS1,PREB,FAF2,WIPI1,C19orf10,HSP90B1,CXCL8,EIF2AK3,TBL2,ARFGAP1,HSPH1,CALR,PDIA5,HSPA5,YOD1,SRPR,HSP90AA1,DNAJB2,CREB3,ATF3,VCP,DNAJB4,PTPN1,BAK1,TSPYL2,SYVN1,OPTN,SEC31A,NFE2L2,VIMP,UBE2J2,KDELR3,SHC1,DNAJB5,HERPUD1,SRPRB,MANF,FICD,DDIT3,DNAJC3,BHLHA15
GO:0009058	biosynthetic process	564	4714	0.12	1.8e-10	9606.ENSP00000009041,9606.ENSP00000035307,9606.ENSP00000040738,9606.ENSP00000053468,9606.ENSP00000157600,9606.ENSP00000164227,9606.ENSP00000166139,9606.ENSP00000171111,9606.ENSP00000196489,9606.ENSP00000198767,9606.ENSP00000209728,9606.ENSP00000210444,9606.ENSP00000211936,9606.ENSP00000212015,9606.ENSP00000216037,9606.ENSP00000216252,9606.ENSP00000216294,9606.ENSP00000217109,9606.ENSP00000220592,…	STARD3NL,CHPF2,BOD1L1,MRPS10,LMCD1,BCL3,FSTL3,KEAP1,ZNF416,RRN3,CDC6,NANS,ZNF184,SIRT1,XBP1,PHF5A,SNAPC1,CSTF1,AGO2,BRF2,MTMR9,RELB,ERF,NAMPT,SETX,NFKB1,PDHX,PRDM4,CSRNP2,CYP27B1,GCLC,HARS2,ODC1,CEBPZ,DLX2,PRDM2,ELL2,ELF1,ALG5,EGR1,AHR,EGR2,EREG,IRF1,INSIG2,FOSB,PLAGL2,NR1D1,ZNF317,ZNF10,SDF2L1,PBX4,DHX29,MED17,SAFB2,JUND,GRWD1,ZCCHC9,RARA,THAP1,RRP8,IGHMBP2,MED10,EIF2S1,MBD2,BHLHE40,TBX3,BACH2,A…
GO:1901360	organic cyclic compound metabolic process	588	4963	0.12	2.21e-10	9606.ENSP00000009041,9606.ENSP00000040738,9606.ENSP00000157600,9606.ENSP00000164227,9606.ENSP00000166139,9606.ENSP00000170564,9606.ENSP00000171111,9606.ENSP00000196489,9606.ENSP00000198767,9606.ENSP00000199320,9606.ENSP00000209728,9606.ENSP00000210444,9606.ENSP00000211936,9606.ENSP00000212015,9606.ENSP00000215904,9606.ENSP00000216037,9606.ENSP00000216038,9606.ENSP00000216117,9606.ENSP00000216252,…	STARD3NL,BOD1L1,LMCD1,BCL3,FSTL3,GPATCH1,KEAP1,ZNF416,RRN3,DIMT1,CDC6,NANS,ZNF184,SIRT1,PDXP,XBP1,RTCB,HMOX1,PHF5A,SNAPC1,ALKBH1,CSTF1,AGO2,BRF2,GSR,RELB,ERF,NAMPT,SETX,NFKB1,PDHX,PRDM4,CSRNP2,CYP27B1,BYSL,HARS2,CEBPZ,DLX2,MSH6,PRDM2,SLC19A2,ABCG2,ELL2,DDX55,RHOQ,ELF1,EGR1,AHR,EGR2,MPHOSPH10,EREG,IRF1,INSIG2,FOSB,PLAGL2,NR1D1,ZNF317,ZNF10,PBX4,DHX29,MED17,SAFB2,JUND,SESN2,GRWD1,AOC2,ZCCHC9,RARA,T…
GO:0035966	response to topologically incorrect protein	53	172	0.53	2.51e-10	9606.ENSP00000158771,9606.ENSP00000164133,9606.ENSP00000216037,9606.ENSP00000222803,9606.ENSP00000248958,9606.ENSP00000249356,9606.ENSP00000254322,9606.ENSP00000256383,9606.ENSP00000256497,9606.ENSP00000259339,9606.ENSP00000260356,9606.ENSP00000260643,9606.ENSP00000261942,9606.ENSP00000262139,9606.ENSP00000262947,9606.ENSP00000263202,9606.ENSP00000299767,9606.ENSP00000306512,9606.ENSP00000307235,…	DERL2,PPP2R5B,XBP1,FKBP14,SDF2L1,DNAJB9,DNAJB1,EIF2S1,EDEM1,TOR1B,THBS1,PREB,FAF2,WIPI1,C19orf10,UFD1L,HSP90B1,CXCL8,EIF2AK3,TBL2,ARFGAP1,CLU,HSPH1,CALR,PDIA5,HSPA5,YOD1,SRPR,HSP90AA1,DNAJB2,CREB3,ATF3,VCP,DNAJB4,PTPN1,BAK1,TSPYL2,SYVN1,OPTN,SEC31A,NFE2L2,VIMP,UBE2J2,KDELR3,SHC1,DNAJB5,HERPUD1,SRPRB,MANF,FICD,DDIT3,DNAJC3,BHLHA15
GO:0034976	response to endoplasmic reticulum stress	64	240	0.47	3.1e-10	9606.ENSP00000158771,9606.ENSP00000164133,9606.ENSP00000185150,9606.ENSP00000200453,9606.ENSP00000216037,9606.ENSP00000221566,9606.ENSP00000222803,9606.ENSP00000237455,9606.ENSP00000248958,9606.ENSP00000249356,9606.ENSP00000253063,9606.ENSP00000256383,9606.ENSP00000256497,9606.ENSP00000259335,9606.ENSP00000260356,9606.ENSP00000260643,9606.ENSP00000261942,9606.ENSP00000262139,9606.ENSP00000262947,…	DERL2,PPP2R5B,ERLEC1,PPP1R15A,XBP1,SGTA,FKBP14,RNF103,SDF2L1,DNAJB9,SESN2,EIF2S1,EDEM1,KIAA0368,THBS1,PREB,FAF2,WIPI1,C19orf10,UFD1L,GET4,TNFRSF10B,NRBF2,TXNDC11,PDIA4,HSP90B1,RNF139,CEBPB,CXCL8,EIF2AK3,TBL2,ARFGAP1,CALR,PDIA5,HSPA5,YOD1,P4HB,SRPR,NPLOC4,DNAJB2,CREB3,ATF3,VCP,PPP1R15B,JUN,PTPN1,BAK1,TSPYL2,SYVN1,SEC31A,NFE2L2,HM13,VIMP,UBE2J2,KDELR3,SHC1,HERPUD1,SRPRB,ATP2A2,FICD,DDIT3,UBE2J1,DNA…
GO:0051172	negative regulation of nitrogen compound metabolic process	313	2307	0.17	5.1e-10	9606.ENSP00000014914,9606.ENSP00000157600,9606.ENSP00000158771,9606.ENSP00000164227,9606.ENSP00000179259,9606.ENSP00000185150,9606.ENSP00000200453,9606.ENSP00000209728,9606.ENSP00000212015,9606.ENSP00000215631,9606.ENSP00000216037,9606.ENSP00000216629,9606.ENSP00000218516,9606.ENSP00000220592,9606.ENSP00000221452,9606.ENSP00000221566,9606.ENSP00000222329,9606.ENSP00000223095,9606.ENSP00000225174,…	GPRC5A,LMCD1,DERL2,BCL3,C12orf5,ERLEC1,PPP1R15A,CDC6,SIRT1,GADD45B,XBP1,BDKRB1,GLA,AGO2,RELB,SGTA,ERF,SERPINE1,PPIF,RASD1,NFKB1,GCLC,MDFI,HBEGF,DLX2,MSH6,RGS2,DUSP1,EGR1,DUSP4,AHR,ORMDL2,SNAI1,EREG,IRF1,C3,FOSB,NR1D1,LIF,DLL4,FXR2,RAF1,JUND,CEP85,SESN2,RARA,THAP1,DNAJB1,RRP8,H3F3B,EIF2S1,MBD2,BHLHE40,TBX3,BACH2,AKIRIN2,SDCBP,USP2,THBS1,TRIM37,N4BP1,CCNE1,ACIN1,EPC1,BIRC3,CBL,MXD1,ASB1,LEF1,SRF,CR…
GO:0006950	response to stress	414	3267	0.14	5.89e-10	9606.ENSP00000013125,9606.ENSP00000040738,9606.ENSP00000064780,9606.ENSP00000158771,9606.ENSP00000164133,9606.ENSP00000164227,9606.ENSP00000179259,9606.ENSP00000185150,9606.ENSP00000200453,9606.ENSP00000212015,9606.ENSP00000215631,9606.ENSP00000216037,9606.ENSP00000216117,9606.ENSP00000216267,9606.ENSP00000216489,9606.ENSP00000216629,9606.ENSP00000216797,9606.ENSP00000220659,9606.ENSP00000220751,…	MAP4K5,BOD1L1,RELT,DERL2,PPP2R5B,BCL3,C12orf5,ERLEC1,PPP1R15A,SIRT1,GADD45B,XBP1,HMOX1,BRD1,ALKBH1,BDKRB1,NFKBIA,BRF2,RIPK2,GSR,RELB,SGTA,FKBP14,SERPINE1,SETX,PPIF,AKAP10,NFKB1,CYP27B1,CLEC4A,FGFR1OP2,GCLC,HBEGF,TUSC2,MSH6,RNF103,DUSP1,EGR1,KALRN,EREG,IRF1,INSIG2,C3,PITHD1,TICAM1,SDF2L1,DNAJB9,EGLN3,RAF1,MICB,SESN2,DNAJB1,RRP8,H3F3B,KDM6B,IGHMBP2,BTG1,EIF2S1,IRAK2,EDEM1,TBX3,OASL,AKIRIN2,KIAA0368…
GO:0034641	cellular nitrogen compound metabolic process	601	5126	0.11	5.91e-10	9606.ENSP00000040738,9606.ENSP00000053468,9606.ENSP00000157600,9606.ENSP00000164227,9606.ENSP00000166139,9606.ENSP00000170564,9606.ENSP00000171111,9606.ENSP00000196489,9606.ENSP00000198767,9606.ENSP00000199320,9606.ENSP00000209728,9606.ENSP00000210444,9606.ENSP00000211936,9606.ENSP00000212015,9606.ENSP00000215904,9606.ENSP00000216037,9606.ENSP00000216038,9606.ENSP00000216117,9606.ENSP00000216252,…	BOD1L1,MRPS10,LMCD1,BCL3,FSTL3,GPATCH1,KEAP1,ZNF416,RRN3,DIMT1,CDC6,NANS,ZNF184,SIRT1,PDXP,XBP1,RTCB,HMOX1,PHF5A,SNAPC1,ALKBH1,CSTF1,GLA,AGO2,BRF2,GSR,RELB,ERF,NAMPT,SETX,NFKB1,PDHX,PRDM4,CSRNP2,GCLC,BYSL,HARS2,ODC1,CEBPZ,DLX2,MSH6,PRDM2,SLC19A2,ABCG2,ELL2,DDX55,RHOQ,ELF1,EGR1,AHR,EGR2,ORMDL2,MPHOSPH10,EREG,IRF1,FOSB,PLAGL2,NR1D1,ZNF317,ZNF10,PBX4,DHX29,MED17,SAFB2,JUND,SESN2,GRWD1,ZCCHC9,RARA,TH…
GO:0080134	regulation of response to stress	198	1299	0.22	1.7e-09	9606.ENSP00000013125,9606.ENSP00000056217,9606.ENSP00000158771,9606.ENSP00000179259,9606.ENSP00000185150,9606.ENSP00000200453,9606.ENSP00000212015,9606.ENSP00000215631,9606.ENSP00000216037,9606.ENSP00000216797,9606.ENSP00000220751,9606.ENSP00000221452,9606.ENSP00000221566,9606.ENSP00000223095,9606.ENSP00000226574,9606.ENSP00000229332,9606.ENSP00000230990,9606.ENSP00000244050,9606.ENSP00000244869,…	MAP4K5,ARHGEF5,DERL2,C12orf5,ERLEC1,PPP1R15A,SIRT1,GADD45B,XBP1,NFKBIA,RIPK2,RELB,SGTA,SERPINE1,NFKB1,CLEC4A,HBEGF,SNAI1,EREG,IRF1,C3,NR1D1,TICAM1,DNAJB9,RAF1,MICB,SESN2,DNAJB1,IRAK2,EDEM1,TRAFD1,RIPK1,IER3,SDCBP,THBS1,RORA,SEMA7A,PIK3C3,TRAF4,NLRC5,VAMP7,UFD1L,BRD4,BIRC3,MUL1,FEM1A,PLK2,PAK1,PPP4C,FBXW7,HSPB8,PPM1B,UBASH3B,OTULIN,SH3RF1,IFNGR2,STAT5B,FGF19,SENP2,F2RL1,TSC1,HSP90B1,TERF2IP,CRK,FA…
GO:0042981	regulation of apoptotic process	221	1501	0.21	1.83e-09	9606.ENSP00000013125,9606.ENSP00000056217,9606.ENSP00000064780,9606.ENSP00000164227,9606.ENSP00000179259,9606.ENSP00000198767,9606.ENSP00000202556,9606.ENSP00000212015,9606.ENSP00000215631,9606.ENSP00000216037,9606.ENSP00000216117,9606.ENSP00000216373,9606.ENSP00000216489,9606.ENSP00000216797,9606.ENSP00000220751,9606.ENSP00000223095,9606.ENSP00000224140,9606.ENSP00000225174,9606.ENSP00000226574,…	MAP4K5,ARHGEF5,RELT,BCL3,C12orf5,RRN3,PPP1R13B,SIRT1,GADD45B,XBP1,HMOX1,SOS2,ALKBH1,NFKBIA,RIPK2,SERPINE1,SETX,PPIF,NFKB1,GCLC,BNIP1,DUSP1,EGR1,KALRN,SNAI1,PLAGL2,SDF2L1,EGLN3,RAF1,GDF15,RARA,BTG1,EIF2S1,TBX3,RIPK1,IER3,THBS1,BCL2L10,CCND2,TRAF4,ACIN1,C19orf10,MAP3K8,IL1A,BIRC3,ACVR1,MAP4K3,SLC9A1,CBL,MUL1,RAPGEF2,ICAM1,GOLPH3,LEF1,NRP1,GAL,SIK1,RHOB,PLK2,DLC1,TNFRSF10B,PAK1,FBXW7,SH3RF1,FLCN,BRA…
GO:0009968	negative regulation of signal transduction	181	1160	0.24	2.5e-09	9606.ENSP00000014914,9606.ENSP00000164227,9606.ENSP00000166139,9606.ENSP00000198767,9606.ENSP00000200453,9606.ENSP00000212015,9606.ENSP00000216037,9606.ENSP00000216117,9606.ENSP00000216797,9606.ENSP00000223095,9606.ENSP00000225174,9606.ENSP00000229416,9606.ENSP00000230321,9606.ENSP00000234198,9606.ENSP00000235382,9606.ENSP00000239223,9606.ENSP00000239882,9606.ENSP00000239938,9606.ENSP00000240100,…	GPRC5A,BCL3,FSTL3,RRN3,PPP1R15A,SIRT1,XBP1,HMOX1,NFKBIA,SERPINE1,PPIF,GCLC,MDFI,DLX2,RGS2,DUSP1,ELF1,EGR1,DUSP4,SNAI1,NR1D1,TICAM1,LIF,DNAJB9,DLL4,RAF1,GDF15,SESN2,RIPK1,THBS1,BCL2L10,RORA,NLRC5,UFD1L,IL1A,ACVR1,CBL,MUL1,ICAM1,ARRDC3,LEF1,FSTL4,NRP1,MAPKAP1,CRTC3,DLC1,TNFRSF10B,FBXW7,PPM1B,PTPRR,UBASH3B,SH3RF1,FLCN,BRAF,DUSP2,SENP2,F2RL1,TSC1,DUSP16,ARHGAP42,FADD,CXCL8,DDIT4,ADAM17,TRIB1,CFLAR,DA…
GO:0043067	regulation of programmed cell death	222	1516	0.21	2.52e-09	9606.ENSP00000013125,9606.ENSP00000056217,9606.ENSP00000064780,9606.ENSP00000164227,9606.ENSP00000179259,9606.ENSP00000198767,9606.ENSP00000202556,9606.ENSP00000212015,9606.ENSP00000215631,9606.ENSP00000216037,9606.ENSP00000216117,9606.ENSP00000216373,9606.ENSP00000216489,9606.ENSP00000216797,9606.ENSP00000220751,9606.ENSP00000223095,9606.ENSP00000224140,9606.ENSP00000225174,9606.ENSP00000226574,…	MAP4K5,ARHGEF5,RELT,BCL3,C12orf5,RRN3,PPP1R13B,SIRT1,GADD45B,XBP1,HMOX1,SOS2,ALKBH1,NFKBIA,RIPK2,SERPINE1,SETX,PPIF,NFKB1,GCLC,BNIP1,DUSP1,EGR1,KALRN,SNAI1,PLAGL2,SDF2L1,EGLN3,RAF1,GDF15,RARA,BTG1,EIF2S1,TBX3,RIPK1,IER3,THBS1,BCL2L10,CCND2,TRAF4,ACIN1,C19orf10,MAP3K8,IL1A,BIRC3,ACVR1,MAP4K3,SLC9A1,CBL,MUL1,RAPGEF2,ICAM1,GOLPH3,LEF1,NRP1,GAL,SIK1,RHOB,PLK2,DLC1,TNFRSF10B,PAK1,SLC25A4,FBXW7,SH3RF1,…
GO:0042325	regulation of phosphorylation	216	1465	0.21	2.76e-09	9606.ENSP00000013125,9606.ENSP00000014914,9606.ENSP00000056217,9606.ENSP00000164024,9606.ENSP00000164133,9606.ENSP00000179259,9606.ENSP00000209728,9606.ENSP00000212015,9606.ENSP00000215631,9606.ENSP00000216037,9606.ENSP00000216629,9606.ENSP00000220325,9606.ENSP00000220751,9606.ENSP00000225174,9606.ENSP00000230990,9606.ENSP00000235382,9606.ENSP00000239223,9606.ENSP00000239938,9606.ENSP00000240100,…	MAP4K5,GPRC5A,ARHGEF5,CELSR3,PPP2R5B,C12orf5,CDC6,SIRT1,GADD45B,XBP1,BDKRB1,EHD4,RIPK2,PPIF,HBEGF,RGS2,DUSP1,EGR1,DUSP4,EREG,C3,LIF,RAF1,GDF15,CEP85,SESN2,PPIL4,IRAK2,RIPK1,SDCBP,THBS1,CCND2,SEMA7A,MMD,TRAF4,NLRC5,CCNE1,C19orf10,MAP3K8,BRD4,ACVR1,MAP4K3,CBL,CCNT2,MUL1,ALS2,RAPGEF2,DNAJC27,ICAM1,MAP3K13,NRP1,MAPKAP1,GTF2H1,GAREM,AKAP8,TNFRSF10B,CDKN2B,NRBF2,PAK1,FBXW7,FLT1,PTPRR,UBASH3B,SH3RF1,FLC…
GO:0010605	negative regulation of macromolecule metabolic process	335	2558	0.16	3.51e-09	9606.ENSP00000014914,9606.ENSP00000157600,9606.ENSP00000158771,9606.ENSP00000164227,9606.ENSP00000185150,9606.ENSP00000200453,9606.ENSP00000209728,9606.ENSP00000212015,9606.ENSP00000215631,9606.ENSP00000216037,9606.ENSP00000216629,9606.ENSP00000220592,9606.ENSP00000221452,9606.ENSP00000221566,9606.ENSP00000222329,9606.ENSP00000223095,9606.ENSP00000225688,9606.ENSP00000226574,9606.ENSP00000229416,…	GPRC5A,LMCD1,DERL2,BCL3,ERLEC1,PPP1R15A,CDC6,SIRT1,GADD45B,XBP1,BDKRB1,AGO2,RELB,SGTA,ERF,SERPINE1,RASD1,NFKB1,GCLC,MDFI,HBEGF,DLX2,MSH6,RGS2,DUSP1,EGR1,DUSP4,AHR,SNAI1,EREG,IRF1,C3,FOSB,NR1D1,LIF,DLL4,FXR2,RAF1,JUND,CEP85,SESN2,RARA,THAP1,DNAJB1,RRP8,H3F3B,EIF2S1,MBD2,BHLHE40,TBX3,BACH2,AKIRIN2,SDCBP,USP2,THBS1,TRIM37,N4BP1,CCNE1,ACIN1,EPC1,BIRC3,CBL,MXD1,ASB1,LEF1,SRF,CREM,BTAF1,JDP2,PELO,TNFRS…
GO:0048585	negative regulation of response to stimulus	217	1483	0.21	4.5e-09	9606.ENSP00000014914,9606.ENSP00000158771,9606.ENSP00000164227,9606.ENSP00000166139,9606.ENSP00000185150,9606.ENSP00000198767,9606.ENSP00000200453,9606.ENSP00000212015,9606.ENSP00000216037,9606.ENSP00000216117,9606.ENSP00000216797,9606.ENSP00000221566,9606.ENSP00000223095,9606.ENSP00000225174,9606.ENSP00000226574,9606.ENSP00000229416,9606.ENSP00000230321,9606.ENSP00000234198,9606.ENSP00000235382,…	GPRC5A,DERL2,BCL3,FSTL3,ERLEC1,RRN3,PPP1R15A,SIRT1,XBP1,HMOX1,NFKBIA,SGTA,SERPINE1,PPIF,NFKB1,GCLC,MDFI,DLX2,RGS2,DUSP1,ELF1,EGR1,DUSP4,SNAI1,NR1D1,TICAM1,LIF,DNAJB9,DLL4,RAF1,MICB,GDF15,SESN2,TRAFD1,RIPK1,THBS1,BCL2L10,RORA,NLRC5,UFD1L,IL1A,BRD4,ACVR1,CBL,MUL1,ICAM1,ARRDC3,LEF1,FSTL4,NRP1,MAPKAP1,CRTC3,FEM1A,PLK2,DLC1,TNFRSF10B,FBXW7,PPM1B,PTPRR,UBASH3B,OTULIN,SH3RF1,FLCN,BRAF,DUSP2,SENP2,NDUFAF…
GO:0009966	regulation of signal transduction	384	3033	0.14	4.71e-09	9606.ENSP00000013125,9606.ENSP00000014914,9606.ENSP00000033079,9606.ENSP00000056217,9606.ENSP00000157600,9606.ENSP00000164133,9606.ENSP00000164227,9606.ENSP00000166139,9606.ENSP00000198767,9606.ENSP00000200453,9606.ENSP00000202556,9606.ENSP00000212015,9606.ENSP00000215631,9606.ENSP00000216037,9606.ENSP00000216117,9606.ENSP00000216373,9606.ENSP00000216489,9606.ENSP00000216797,9606.ENSP00000220507,…	MAP4K5,GPRC5A,FAM13B,ARHGEF5,LMCD1,PPP2R5B,BCL3,FSTL3,RRN3,PPP1R15A,PPP1R13B,SIRT1,GADD45B,XBP1,HMOX1,SOS2,ALKBH1,NFKBIA,RHOV,RIPK2,NAMPT,SERPINE1,PPIF,NFKB1,CYP27B1,GCLC,MDFI,GUCA1B,HBEGF,DLX2,RGS2,RHOQ,DUSP1,ELF1,EGR1,DUSP4,KALRN,SNAI1,EREG,IRF1,TNFSF9,C3,PLAGL2,NR1D1,TICAM1,LIF,DNAJB9,DLL4,KIAA1244,RAF1,SAFB2,GDF15,SESN2,JAG1,MBD2,IRAK2,RIPK1,IER3,SDCBP,THBS1,BCL2L10,ARHGAP29,RORA,SEMA7A,TRAF4…
GO:0048583	regulation of response to stimulus	470	3882	0.12	6.33e-09	9606.ENSP00000013125,9606.ENSP00000014914,9606.ENSP00000033079,9606.ENSP00000056217,9606.ENSP00000157600,9606.ENSP00000158771,9606.ENSP00000164133,9606.ENSP00000164227,9606.ENSP00000166139,9606.ENSP00000179259,9606.ENSP00000185150,9606.ENSP00000198767,9606.ENSP00000200453,9606.ENSP00000202556,9606.ENSP00000212015,9606.ENSP00000215631,9606.ENSP00000216037,9606.ENSP00000216117,9606.ENSP00000216373,…	MAP4K5,GPRC5A,FAM13B,ARHGEF5,LMCD1,DERL2,PPP2R5B,BCL3,FSTL3,C12orf5,ERLEC1,RRN3,PPP1R15A,PPP1R13B,SIRT1,GADD45B,XBP1,HMOX1,SOS2,ALKBH1,NFKBIA,RHOV,RIPK2,RELB,SGTA,NAMPT,SERPINE1,PPIF,NFKB1,CYP27B1,CLEC4A,GCLC,MDFI,GUCA1B,HBEGF,DLX2,MSH6,RGS2,RHOQ,DUSP1,ELF1,EGR1,DUSP4,KALRN,SNAI1,EREG,IRF1,TNFSF9,C3,PLAGL2,NR1D1,TICAM1,LIF,DNAJB9,DLL4,KIAA1244,RAF1,MICB,SAFB2,GDF15,SESN2,RARA,DNAJB1,JAG1,MBD2,IRA…
GO:0010648	negative regulation of cell communication	189	1255	0.22	1.14e-08	9606.ENSP00000014914,9606.ENSP00000164227,9606.ENSP00000166139,9606.ENSP00000198767,9606.ENSP00000200453,9606.ENSP00000212015,9606.ENSP00000216037,9606.ENSP00000216117,9606.ENSP00000216797,9606.ENSP00000223095,9606.ENSP00000225174,9606.ENSP00000229416,9606.ENSP00000230321,9606.ENSP00000234198,9606.ENSP00000235382,9606.ENSP00000239223,9606.ENSP00000239882,9606.ENSP00000239938,9606.ENSP00000240100,…	GPRC5A,BCL3,FSTL3,RRN3,PPP1R15A,SIRT1,XBP1,HMOX1,NFKBIA,SERPINE1,PPIF,GCLC,MDFI,DLX2,RGS2,DUSP1,ELF1,EGR1,DUSP4,KALRN,SNAI1,NR1D1,TICAM1,LIF,DNAJB9,DLL4,RAF1,GDF15,SESN2,RAB11FIP5,RIPK1,THBS1,BCL2L10,RORA,NLRC5,UFD1L,IL1A,ACVR1,CBL,MUL1,ICAM1,ARRDC3,LEF1,FSTL4,SRF,NRP1,MAPKAP1,CRTC3,PLK2,DLC1,TNFRSF10B,FBXW7,PPM1B,PTPRR,UBASH3B,SH3RF1,FLCN,BRAF,DUSP2,SENP2,NDUFAF2,F2RL1,TSC1,DUSP16,ARHGAP42,MIDN,…
GO:0035556	intracellular signal transduction	220	1528	0.2	1.15e-08	9606.ENSP00000013125,9606.ENSP00000056217,9606.ENSP00000164227,9606.ENSP00000200453,9606.ENSP00000202556,9606.ENSP00000212015,9606.ENSP00000216037,9606.ENSP00000216117,9606.ENSP00000216373,9606.ENSP00000216797,9606.ENSP00000220507,9606.ENSP00000220751,9606.ENSP00000221452,9606.ENSP00000224140,9606.ENSP00000225688,9606.ENSP00000226574,9606.ENSP00000230990,9606.ENSP00000234420,9606.ENSP00000238738,…	MAP4K5,ARHGEF5,BCL3,PPP1R15A,PPP1R13B,SIRT1,XBP1,HMOX1,SOS2,NFKBIA,RHOV,RIPK2,RELB,SETX,RASD1,NFKB1,HBEGF,MSH6,RHOQ,DUSP1,KALRN,AHR,EREG,WNK4,TICAM1,LIF,MKNK2,RAF1,SESN2,RRP8,IRAK2,RIPK1,SDCBP,BCL2L10,ARHGAP29,MAPK6,PIK3C3,TRAF4,MAP3K8,BIRC3,ARID3A,MAP4K3,SLC9A1,MUL1,ALS2,PIKFYVE,RASGEF1B,RAPGEF2,ASB1,MAP3K13,GAL,MAPKAP1,RHOF,SIK1,RHOB,PLK2,TNFRSF10B,ASB6,PAK1,PPP4C,TJP1,OTULIN,FLCN,PRKAG2,BRAF,B…
GO:0050790	regulation of catalytic activity	299	2249	0.17	1.15e-08	9606.ENSP00000013125,9606.ENSP00000014914,9606.ENSP00000033079,9606.ENSP00000056217,9606.ENSP00000164133,9606.ENSP00000179259,9606.ENSP00000200453,9606.ENSP00000209728,9606.ENSP00000212015,9606.ENSP00000215631,9606.ENSP00000218516,9606.ENSP00000220751,9606.ENSP00000221086,9606.ENSP00000223095,9606.ENSP00000225174,9606.ENSP00000225235,9606.ENSP00000226574,9606.ENSP00000228515,9606.ENSP00000228606,…	MAP4K5,GPRC5A,FAM13B,ARHGEF5,PPP2R5B,C12orf5,PPP1R15A,CDC6,SIRT1,GADD45B,GLA,RIPK2,MTMR9,SERPINE1,PPIF,TBC1D12,NFKB1,CSRNP2,CYP27B1,GUCA1B,MSH6,RGS2,DUSP1,EGR1,DUSP4,KALRN,MPHOSPH10,EREG,C3,EGLN3,KIAA1244,RAF1,GDF15,CEP85,SESN2,ZCCHC9,DNAJB1,IRAK2,AKIRIN2,RIPK1,DCUN1D5,THBS1,BCL2L10,ARHGAP29,PREB,CCND2,FAF2,MMD,TMED2,TRAF4,NLRC5,CCNE1,ELL,MAP3K8,ARFGAP3,BIRC3,MAP4K3,CBL,CCNT2,MUL1,ALS2,RASGEF1B,R…
GO:0023057	negative regulation of signaling	189	1258	0.22	1.31e-08	9606.ENSP00000014914,9606.ENSP00000164227,9606.ENSP00000166139,9606.ENSP00000198767,9606.ENSP00000200453,9606.ENSP00000212015,9606.ENSP00000216037,9606.ENSP00000216117,9606.ENSP00000216797,9606.ENSP00000223095,9606.ENSP00000225174,9606.ENSP00000229416,9606.ENSP00000230321,9606.ENSP00000234198,9606.ENSP00000235382,9606.ENSP00000239223,9606.ENSP00000239882,9606.ENSP00000239938,9606.ENSP00000240100,…	GPRC5A,BCL3,FSTL3,RRN3,PPP1R15A,SIRT1,XBP1,HMOX1,NFKBIA,SERPINE1,PPIF,GCLC,MDFI,DLX2,RGS2,DUSP1,ELF1,EGR1,DUSP4,KALRN,SNAI1,NR1D1,TICAM1,LIF,DNAJB9,DLL4,RAF1,GDF15,SESN2,RAB11FIP5,RIPK1,THBS1,BCL2L10,RORA,NLRC5,UFD1L,IL1A,ACVR1,CBL,MUL1,ICAM1,ARRDC3,LEF1,FSTL4,SRF,NRP1,MAPKAP1,CRTC3,PLK2,DLC1,TNFRSF10B,FBXW7,PPM1B,PTPRR,UBASH3B,SH3RF1,FLCN,BRAF,DUSP2,SENP2,NDUFAF2,F2RL1,TSC1,DUSP16,ARHGAP42,MIDN,…
GO:1902532	negative regulation of intracellular signal transduction	98	514	0.32	1.66e-08	9606.ENSP00000164227,9606.ENSP00000198767,9606.ENSP00000212015,9606.ENSP00000216037,9606.ENSP00000225174,9606.ENSP00000235382,9606.ENSP00000239223,9606.ENSP00000240100,9606.ENSP00000244050,9606.ENSP00000249075,9606.ENSP00000253063,9606.ENSP00000259808,9606.ENSP00000260356,9606.ENSP00000260442,9606.ENSP00000261523,9606.ENSP00000263202,9606.ENSP00000264198,9606.ENSP00000265138,9606.ENSP00000265960,…	BCL3,RRN3,SIRT1,XBP1,PPIF,RGS2,DUSP1,DUSP4,SNAI1,LIF,SESN2,RIPK1,THBS1,BCL2L10,RORA,UFD1L,MUL1,ARRDC3,MAPKAP1,CRTC3,DLC1,PPM1B,PTPRR,FLCN,DUSP2,SENP2,F2RL1,TSC1,DUSP16,ARHGAP42,DDIT4,PER1,CLU,PIBF1,HSPH1,SOCS3,NPLOC4,CAV1,PLAUR,RIOK3,CREB3,ATF3,ARHGAP12,EPHA2,MTOR,GPATCH3,DUSP10,DYRK3,RASAL2,EFNA1,MCL1,EIF3A,DUSP5,PTPN1,RAPGEF1,DLG5,ZC3H12A,KLF4,OTUD3,SPRY2,SYVN1,ERRFI1,FLRT3,OPTN,XDH,ARHGAP44,GP…
GO:0065009	regulation of molecular function	409	3322	0.13	2.5e-08	9606.ENSP00000013125,9606.ENSP00000014914,9606.ENSP00000033079,9606.ENSP00000056217,9606.ENSP00000164133,9606.ENSP00000164227,9606.ENSP00000171111,9606.ENSP00000179259,9606.ENSP00000200453,9606.ENSP00000209728,9606.ENSP00000212015,9606.ENSP00000215631,9606.ENSP00000216117,9606.ENSP00000216373,9606.ENSP00000216489,9606.ENSP00000216797,9606.ENSP00000218516,9606.ENSP00000220751,9606.ENSP00000221086,…	MAP4K5,GPRC5A,FAM13B,ARHGEF5,PPP2R5B,BCL3,KEAP1,C12orf5,PPP1R15A,CDC6,SIRT1,GADD45B,HMOX1,SOS2,ALKBH1,NFKBIA,GLA,RIPK2,MTMR9,NAMPT,SERPINE1,PPIF,TBC1D12,NFKB1,CSRNP2,CYP27B1,MDFI,GUCA1B,HBEGF,MSH6,RGS2,DUSP1,EGR1,DUSP4,KALRN,MPHOSPH10,EREG,TNFSF9,C3,WNK4,TICAM1,LIF,EGLN3,KIAA1244,RAF1,GDF15,CEP85,SESN2,ZCCHC9,RARA,DNAJB1,JAG1,EIF2S1,MBD2,IRAK2,BHLHE40,AKIRIN2,RIPK1,DCUN1D5,THBS1,BCL2L10,ARHGAP29,…
GO:0023051	regulation of signaling	412	3360	0.13	3.37e-08	9606.ENSP00000013125,9606.ENSP00000014914,9606.ENSP00000033079,9606.ENSP00000056217,9606.ENSP00000157600,9606.ENSP00000164133,9606.ENSP00000164227,9606.ENSP00000166139,9606.ENSP00000198767,9606.ENSP00000200453,9606.ENSP00000202556,9606.ENSP00000212015,9606.ENSP00000215631,9606.ENSP00000216037,9606.ENSP00000216117,9606.ENSP00000216373,9606.ENSP00000216489,9606.ENSP00000216797,9606.ENSP00000220507,…	MAP4K5,GPRC5A,FAM13B,ARHGEF5,LMCD1,PPP2R5B,BCL3,FSTL3,RRN3,PPP1R15A,PPP1R13B,SIRT1,GADD45B,XBP1,HMOX1,SOS2,ALKBH1,NFKBIA,RHOV,RIPK2,NAMPT,SERPINE1,PPIF,NFKB1,CYP27B1,GCLC,MDFI,GUCA1B,HBEGF,DLX2,RGS2,RHOQ,DUSP1,ELF1,EGR1,DUSP4,KALRN,EGR2,SNAI1,EREG,IRF1,TNFSF9,C3,PLAGL2,NR1D1,TICAM1,LIF,DNAJB9,DLL4,KIAA1244,RAF1,SAFB2,GDF15,SESN2,RARA,JAG1,MBD2,IRAK2,RAB11FIP5,RIPK1,IER3,SDCBP,THBS1,BCL2L10,ARHGAP…
GO:0030968	endoplasmic reticulum unfolded protein response	36	103	0.59	3.92e-08	9606.ENSP00000158771,9606.ENSP00000164133,9606.ENSP00000216037,9606.ENSP00000222803,9606.ENSP00000249356,9606.ENSP00000256383,9606.ENSP00000256497,9606.ENSP00000260643,9606.ENSP00000262139,9606.ENSP00000262947,9606.ENSP00000299767,9606.ENSP00000306512,9606.ENSP00000307235,9606.ENSP00000307260,9606.ENSP00000314615,9606.ENSP00000320866,9606.ENSP00000323313,9606.ENSP00000324173,9606.ENSP00000326813,…	DERL2,PPP2R5B,XBP1,FKBP14,DNAJB9,EIF2S1,EDEM1,PREB,WIPI1,C19orf10,HSP90B1,CXCL8,EIF2AK3,TBL2,ARFGAP1,CALR,PDIA5,HSPA5,YOD1,SRPR,CREB3,ATF3,VCP,PTPN1,TSPYL2,SYVN1,SEC31A,NFE2L2,VIMP,KDELR3,SHC1,HERPUD1,SRPRB,DDIT3,DNAJC3,BHLHA15
GO:0032269	negative regulation of cellular protein metabolic process	158	1014	0.23	4.76e-08	9606.ENSP00000014914,9606.ENSP00000158771,9606.ENSP00000185150,9606.ENSP00000200453,9606.ENSP00000212015,9606.ENSP00000215631,9606.ENSP00000216037,9606.ENSP00000216629,9606.ENSP00000220592,9606.ENSP00000221566,9606.ENSP00000223095,9606.ENSP00000226574,9606.ENSP00000229416,9606.ENSP00000235382,9606.ENSP00000239223,9606.ENSP00000240100,9606.ENSP00000245907,9606.ENSP00000249075,9606.ENSP00000250113,…	GPRC5A,DERL2,ERLEC1,PPP1R15A,SIRT1,GADD45B,XBP1,BDKRB1,AGO2,SGTA,SERPINE1,NFKB1,GCLC,RGS2,DUSP1,DUSP4,C3,LIF,FXR2,RAF1,CEP85,SESN2,RARA,EIF2S1,SDCBP,THBS1,N4BP1,BIRC3,CBL,LEF1,TNFRSF10B,CDKN2B,PTPRR,UBASH3B,SH3RF1,FLCN,PRKAG2,DUSP2,BTG2,KLF15,SENP2,F2RL1,LMTK2,TSC1,DUSP16,TERF2IP,RNF139,IBTK,PRKCE,YWHAG,EIF2AK3,DDIT4,BOD1,TNFRSF10D,TRIB1,CFLAR,PER1,SWAP70,TLK2,PIBF1,SAMD4B,HSPH1,PINX1,SUPT6H,CALR…
GO:0034620	cellular response to unfolded protein	38	115	0.56	4.76e-08	9606.ENSP00000158771,9606.ENSP00000164133,9606.ENSP00000216037,9606.ENSP00000222803,9606.ENSP00000249356,9606.ENSP00000256383,9606.ENSP00000256497,9606.ENSP00000260643,9606.ENSP00000262139,9606.ENSP00000262947,9606.ENSP00000299767,9606.ENSP00000306512,9606.ENSP00000307235,9606.ENSP00000307260,9606.ENSP00000314615,9606.ENSP00000320866,9606.ENSP00000323313,9606.ENSP00000324173,9606.ENSP00000326813,…	DERL2,PPP2R5B,XBP1,FKBP14,DNAJB9,EIF2S1,EDEM1,PREB,WIPI1,C19orf10,HSP90B1,CXCL8,EIF2AK3,TBL2,ARFGAP1,CALR,PDIA5,HSPA5,YOD1,SRPR,CREB3,ATF3,VCP,PTPN1,BAK1,TSPYL2,SYVN1,OPTN,SEC31A,NFE2L2,VIMP,KDELR3,SHC1,HERPUD1,SRPRB,DDIT3,DNAJC3,BHLHA15
GO:0051248	negative regulation of protein metabolic process	165	1075	0.23	5.06e-08	9606.ENSP00000014914,9606.ENSP00000158771,9606.ENSP00000164227,9606.ENSP00000185150,9606.ENSP00000200453,9606.ENSP00000212015,9606.ENSP00000215631,9606.ENSP00000216037,9606.ENSP00000216629,9606.ENSP00000220592,9606.ENSP00000221566,9606.ENSP00000223095,9606.ENSP00000226574,9606.ENSP00000229416,9606.ENSP00000230990,9606.ENSP00000235382,9606.ENSP00000239223,9606.ENSP00000240100,9606.ENSP00000245907,…	GPRC5A,DERL2,BCL3,ERLEC1,PPP1R15A,SIRT1,GADD45B,XBP1,BDKRB1,AGO2,SGTA,SERPINE1,NFKB1,GCLC,HBEGF,RGS2,DUSP1,DUSP4,C3,LIF,FXR2,RAF1,CEP85,SESN2,RARA,EIF2S1,SDCBP,THBS1,N4BP1,BIRC3,CBL,ASB1,LEF1,TNFRSF10B,CDKN2B,PTPRR,UBASH3B,SH3RF1,FLCN,PRKAG2,DUSP2,BTG2,KLF15,SENP2,F2RL1,LMTK2,TSC1,DUSP16,TERF2IP,RNF139,IBTK,SF3B3,PRKCE,YWHAG,EIF2AK3,DDIT4,BOD1,TNFRSF10D,TRIB1,CFLAR,PER1,CLU,SWAP70,TLK2,PIBF1,SAMD…
GO:0010646	regulation of cell communication	407	3327	0.13	5.66e-08	9606.ENSP00000013125,9606.ENSP00000014914,9606.ENSP00000033079,9606.ENSP00000056217,9606.ENSP00000157600,9606.ENSP00000164133,9606.ENSP00000164227,9606.ENSP00000166139,9606.ENSP00000198767,9606.ENSP00000200453,9606.ENSP00000202556,9606.ENSP00000212015,9606.ENSP00000215631,9606.ENSP00000216037,9606.ENSP00000216117,9606.ENSP00000216373,9606.ENSP00000216489,9606.ENSP00000216797,9606.ENSP00000220507,…	MAP4K5,GPRC5A,FAM13B,ARHGEF5,LMCD1,PPP2R5B,BCL3,FSTL3,RRN3,PPP1R15A,PPP1R13B,SIRT1,GADD45B,XBP1,HMOX1,SOS2,ALKBH1,NFKBIA,RHOV,RIPK2,NAMPT,SERPINE1,PPIF,NFKB1,CYP27B1,GCLC,MDFI,GUCA1B,HBEGF,DLX2,RGS2,RHOQ,DUSP1,ELF1,EGR1,DUSP4,KALRN,EGR2,SNAI1,EREG,IRF1,TNFSF9,C3,PLAGL2,NR1D1,TICAM1,LIF,DNAJB9,DLL4,KIAA1244,RAF1,SAFB2,GDF15,SESN2,RARA,JAG1,MBD2,IRAK2,RAB11FIP5,RIPK1,IER3,SDCBP,THBS1,BCL2L10,ARHGAP…
GO:0070887	cellular response to chemical stimulus	339	2672	0.15	6.5e-08	9606.ENSP00000056217,9606.ENSP00000064780,9606.ENSP00000158771,9606.ENSP00000164133,9606.ENSP00000166139,9606.ENSP00000171111,9606.ENSP00000179259,9606.ENSP00000209728,9606.ENSP00000212015,9606.ENSP00000215904,9606.ENSP00000216037,9606.ENSP00000216117,9606.ENSP00000216797,9606.ENSP00000220325,9606.ENSP00000220592,9606.ENSP00000220659,9606.ENSP00000220751,9606.ENSP00000221130,9606.ENSP00000222803,…	ARHGEF5,RELT,DERL2,PPP2R5B,FSTL3,KEAP1,C12orf5,CDC6,SIRT1,PDXP,XBP1,HMOX1,NFKBIA,EHD4,AGO2,BRF2,RIPK2,GSR,FKBP14,SERPINE1,SETX,PPIF,NFKB1,IL10RA,RAB35,GCLC,HBEGF,RHOQ,DUSP1,EGR1,AHR,EGR2,EREG,IRF1,TNFSF9,FOSB,NR1D1,TICAM1,SDF2L1,LIF,DNAJB9,DLL4,EGLN3,MKNK2,RAF1,MED17,GDF15,JUND,NUMBL,SESN2,AOC2,RARA,KDM6B,EIF2S1,MBD2,IRAK2,EDEM1,OASL,RAB11FIP5,RIPK1,THBS1,PREB,RORA,MAPK6,WIPI1,ADNP2,CCNE1,C19orf1…
GO:0071310	cellular response to organic substance	291	2219	0.16	7.01e-08	9606.ENSP00000064780,9606.ENSP00000158771,9606.ENSP00000164133,9606.ENSP00000171111,9606.ENSP00000209728,9606.ENSP00000212015,9606.ENSP00000215904,9606.ENSP00000216037,9606.ENSP00000216117,9606.ENSP00000216797,9606.ENSP00000220325,9606.ENSP00000220592,9606.ENSP00000220751,9606.ENSP00000222803,9606.ENSP00000223095,9606.ENSP00000224140,9606.ENSP00000226574,9606.ENSP00000227752,9606.ENSP00000229340,…	RELT,DERL2,PPP2R5B,KEAP1,CDC6,SIRT1,PDXP,XBP1,HMOX1,NFKBIA,EHD4,AGO2,RIPK2,FKBP14,SERPINE1,SETX,NFKB1,IL10RA,RAB35,GCLC,RHOQ,DUSP1,EGR1,AHR,EGR2,EREG,IRF1,TNFSF9,FOSB,NR1D1,TICAM1,SDF2L1,LIF,DNAJB9,DLL4,RAF1,MED17,GDF15,JUND,NUMBL,SESN2,RARA,EIF2S1,MBD2,IRAK2,EDEM1,OASL,RAB11FIP5,RIPK1,THBS1,PREB,RORA,MAPK6,WIPI1,ADNP2,CCNE1,C19orf10,MAP3K8,UFD1L,IL1A,BIRC3,ACVR1,ZNF106,SLC9A1,CBL,MUL1,RAPGEF2,IC…
GO:0080135	regulation of cellular response to stress	109	618	0.29	7.42e-08	9606.ENSP00000013125,9606.ENSP00000056217,9606.ENSP00000158771,9606.ENSP00000179259,9606.ENSP00000185150,9606.ENSP00000200453,9606.ENSP00000212015,9606.ENSP00000215631,9606.ENSP00000216037,9606.ENSP00000220751,9606.ENSP00000221566,9606.ENSP00000244050,9606.ENSP00000249356,9606.ENSP00000254322,9606.ENSP00000256497,9606.ENSP00000259808,9606.ENSP00000259874,9606.ENSP00000260130,9606.ENSP00000262395,…	MAP4K5,ARHGEF5,DERL2,C12orf5,ERLEC1,PPP1R15A,SIRT1,GADD45B,XBP1,RIPK2,SGTA,SNAI1,DNAJB9,DNAJB1,EDEM1,RIPK1,IER3,SDCBP,TRAF4,BRD4,MUL1,PLK2,PAK1,PPP4C,FBXW7,HSPB8,SH3RF1,FGF19,SENP2,F2RL1,TSC1,TERF2IP,EIF2AK3,ZNF622,PER1,CLU,DVL3,HSPH1,RNF168,HSPA5,KARS,PMAIP1,YOD1,P4HB,NDEL1,HSP90AA1,CAV1,CREB3,INSIG1,PPP4R2,MTOR,LRIG2,DUSP10,MAPKAPK2,DYRK3,PPP1R15B,IER5,CTGF,MCL1,BAG3,GADD45A,PTPN1,ANKRD1,RAPGEF…
GO:0001932	regulation of protein phosphorylation	197	1370	0.2	1.16e-07	9606.ENSP00000013125,9606.ENSP00000014914,9606.ENSP00000056217,9606.ENSP00000164024,9606.ENSP00000164133,9606.ENSP00000209728,9606.ENSP00000212015,9606.ENSP00000215631,9606.ENSP00000216037,9606.ENSP00000216629,9606.ENSP00000220325,9606.ENSP00000220751,9606.ENSP00000230990,9606.ENSP00000235382,9606.ENSP00000239223,9606.ENSP00000239938,9606.ENSP00000240100,9606.ENSP00000244869,9606.ENSP00000245907,…	MAP4K5,GPRC5A,ARHGEF5,CELSR3,PPP2R5B,CDC6,SIRT1,GADD45B,XBP1,BDKRB1,EHD4,RIPK2,HBEGF,RGS2,DUSP1,EGR1,DUSP4,EREG,C3,LIF,RAF1,GDF15,CEP85,SESN2,PPIL4,IRAK2,RIPK1,SDCBP,THBS1,CCND2,SEMA7A,MMD,TRAF4,CCNE1,C19orf10,MAP3K8,BRD4,ACVR1,MAP4K3,CBL,CCNT2,MUL1,ALS2,RAPGEF2,DNAJC27,ICAM1,MAP3K13,NRP1,MAPKAP1,GTF2H1,GAREM,AKAP8,TNFRSF10B,CDKN2B,PAK1,FBXW7,FLT1,PTPRR,UBASH3B,SH3RF1,FLCN,PRKAG2,BRAF,DUSP2,ITGA5…
GO:0051247	positive regulation of protein metabolic process	221	1587	0.19	1.26e-07	9606.ENSP00000013125,9606.ENSP00000056217,9606.ENSP00000164227,9606.ENSP00000171111,9606.ENSP00000200453,9606.ENSP00000209728,9606.ENSP00000212015,9606.ENSP00000215631,9606.ENSP00000216037,9606.ENSP00000216117,9606.ENSP00000216797,9606.ENSP00000220325,9606.ENSP00000220751,9606.ENSP00000221566,9606.ENSP00000229416,9606.ENSP00000230990,9606.ENSP00000239938,9606.ENSP00000244869,9606.ENSP00000245414,…	MAP4K5,ARHGEF5,BCL3,KEAP1,PPP1R15A,CDC6,SIRT1,GADD45B,XBP1,HMOX1,NFKBIA,EHD4,RIPK2,SGTA,GCLC,HBEGF,EGR1,EREG,IRF1,C3,TICAM1,LIF,EGLN3,RAF1,GDF15,IRAK2,EDEM1,AKIRIN2,RIPK1,SDCBP,DCUN1D5,THBS1,BCL2L10,CCND2,SEMA7A,MMD,TRAF4,C19orf10,MAP3K8,IL1A,BIRC3,ACVR1,MAP4K3,CCNT2,MUL1,ALS2,RAPGEF2,DNAJC27,ICAM1,MAP3K13,ARRDC3,NRP1,MAPKAP1,JDP2,ARRDC4,GAREM,AKAP8,PLK2,DLC1,TNFRSF10B,PAK1,FBXW7,FLT1,NIPBL,SH3RF…
GO:0035967	cellular response to topologically incorrect protein	40	132	0.52	1.28e-07	9606.ENSP00000158771,9606.ENSP00000164133,9606.ENSP00000216037,9606.ENSP00000222803,9606.ENSP00000248958,9606.ENSP00000249356,9606.ENSP00000256383,9606.ENSP00000256497,9606.ENSP00000260643,9606.ENSP00000262139,9606.ENSP00000262947,9606.ENSP00000263202,9606.ENSP00000299767,9606.ENSP00000306512,9606.ENSP00000307235,9606.ENSP00000307260,9606.ENSP00000314615,9606.ENSP00000320866,9606.ENSP00000323313,…	DERL2,PPP2R5B,XBP1,FKBP14,SDF2L1,DNAJB9,EIF2S1,EDEM1,PREB,WIPI1,C19orf10,UFD1L,HSP90B1,CXCL8,EIF2AK3,TBL2,ARFGAP1,CALR,PDIA5,HSPA5,YOD1,SRPR,CREB3,ATF3,VCP,PTPN1,BAK1,TSPYL2,SYVN1,OPTN,SEC31A,NFE2L2,VIMP,KDELR3,SHC1,HERPUD1,SRPRB,DDIT3,DNAJC3,BHLHA15
GO:0051726	regulation of cell cycle	169	1129	0.22	1.48e-07	9606.ENSP00000013125,9606.ENSP00000164133,9606.ENSP00000200453,9606.ENSP00000202556,9606.ENSP00000209728,9606.ENSP00000212015,9606.ENSP00000215631,9606.ENSP00000215904,9606.ENSP00000217402,9606.ENSP00000239223,9606.ENSP00000244869,9606.ENSP00000245414,9606.ENSP00000249075,9606.ENSP00000252818,9606.ENSP00000252992,9606.ENSP00000254066,9606.ENSP00000254250,9606.ENSP00000254605,9606.ENSP00000256925,…	MAP4K5,PPP2R5B,PPP1R15A,PPP1R13B,CDC6,SIRT1,GADD45B,PDXP,CHMP4B,DUSP1,EREG,IRF1,LIF,JUND,CEP85,RARA,THAP1,RRP8,CABLES1,TBX3,SDCBP,USP2,THBS1,HAUS2,CCND2,PIK3C3,TRIM37,CCNE1,MAP3K8,EPC1,IL1A,BRD4,ARID3A,MAP4K3,CCNT2,LEF1,GTF2H1,SIK1,RHOB,DYNC1LI1,PLK2,CDKN2B,PAK1,ORAOV1,FBXW7,TRIM36,RIOK2,FLCN,WHAMM,NSMCE2,PRKAG2,BTG2,STAT5B,TGFA,CCNL1,SENP2,TSC1,TUBA1A,LIN37,CDK2AP2,IL12A,JUNB,CDC25A,PRKCE,SLC25A…
GO:0070647	protein modification by small protein conjugation or removal	147	945	0.23	1.96e-07	9606.ENSP00000171111,9606.ENSP00000212015,9606.ENSP00000216039,9606.ENSP00000216797,9606.ENSP00000219313,9606.ENSP00000232766,9606.ENSP00000237281,9606.ENSP00000237455,9606.ENSP00000242480,9606.ENSP00000242719,9606.ENSP00000247977,9606.ENSP00000255304,9606.ENSP00000255764,9606.ENSP00000256257,9606.ENSP00000257749,9606.ENSP00000259808,9606.ENSP00000260187,9606.ENSP00000260247,9606.ENSP00000261712,…	KEAP1,SIRT1,JOSD1,NFKBIA,PSMD7,KLHL18,FBXO30,RNF103,EGR2,RNF11,FBXL12,USPL1,MED10,RNF122,BACH2,RIPK1,USP2,DCUN1D5,PSMD11,TRIM37,UFD1L,BIRC3,CBL,MUL1,ASB1,PSMD3,ARRDC4,FEM1A,FEM1C,ASB6,FBXW7,USP12,TRIM36,OTULIN,TRIM11,SH3RF1,NSMCE2,MED8,MED27,RNF25,SENP2,FBXO33,UNKL,CDC25A,RNF139,DESI2,RNF181,TADA2B,RCE1,FBXO45,USP9X,RBBP6,MALT1,DCUN1D3,RNF168,RCHY1,RNF10,SIAH2,UBE2O,RNF166,YOD1,SPSB1,SOCS3,SMAD3,…
GO:0051128	regulation of cellular component organization	297	2306	0.15	2.29e-07	9606.ENSP00000056217,9606.ENSP00000158771,9606.ENSP00000164133,9606.ENSP00000179259,9606.ENSP00000198767,9606.ENSP00000200453,9606.ENSP00000202556,9606.ENSP00000209728,9606.ENSP00000212015,9606.ENSP00000215904,9606.ENSP00000216037,9606.ENSP00000216629,9606.ENSP00000217402,9606.ENSP00000220325,9606.ENSP00000220509,9606.ENSP00000223095,9606.ENSP00000224140,9606.ENSP00000225174,9606.ENSP00000225235,…	ARHGEF5,DERL2,PPP2R5B,C12orf5,RRN3,PPP1R15A,PPP1R13B,CDC6,SIRT1,PDXP,XBP1,BDKRB1,CHMP4B,EHD4,VPS18,SERPINE1,SETX,PPIF,TBC1D12,IL10RA,CYP27B1,HBEGF,RGS2,CAMSAP2,RHOQ,ATAD2B,DUSP1,KALRN,SNAI1,EREG,C3,LIF,RAF1,GDF15,CEP85,SESN2,DNAJB1,H3F3B,ACTR3B,BTG1,SDCBP,THBS1,PREB,MAPK6,SEMA7A,ADNP2,TRIM37,VAMP7,IL1A,SLC9A1,LCAT,CBL,MUL1,SLAIN2,PIKFYVE,RAPGEF2,ICAM1,GOLPH3,LEF1,FSTL4,SRF,NRP1,GAL,GTF2H1,CLSTN3,…
GO:0009894	regulation of catabolic process	134	840	0.24	2.58e-07	9606.ENSP00000158771,9606.ENSP00000171111,9606.ENSP00000179259,9606.ENSP00000185150,9606.ENSP00000212015,9606.ENSP00000216037,9606.ENSP00000216117,9606.ENSP00000217402,9606.ENSP00000220592,9606.ENSP00000220751,9606.ENSP00000221086,9606.ENSP00000221566,9606.ENSP00000225235,9606.ENSP00000229416,9606.ENSP00000234111,9606.ENSP00000248244,9606.ENSP00000253063,9606.ENSP00000256497,9606.ENSP00000260130,…	DERL2,KEAP1,C12orf5,ERLEC1,SIRT1,XBP1,HMOX1,CHMP4B,AGO2,RIPK2,MTMR9,SGTA,TBC1D12,GCLC,ODC1,TICAM1,SESN2,EDEM1,SDCBP,N4BP1,MUL1,PIKFYVE,PSMD3,CRTC3,C18orf8,NPC1,RAB5A,PLK2,CCRN4L,FBXW7,FLCN,NSMCE2,PRKAG2,BTG2,STX5,KIAA0226,TSC1,RNF139,SF3B3,PRKCE,DDIT4,PPP1R3B,PDE12,TRIB1,DAB2,ZFAND2A,CLU,TLK2,SAMD4B,RCHY1,RNF166,YOD1,RAB12,DHX34,SMAD3,HSP90AA1,DNAJB2,ATG101,CAV1,RNF41,NRD1,WAC,UVRAG,MYLIP,VCP,NUP…
GO:0043549	regulation of kinase activity	135	849	0.24	2.67e-07	9606.ENSP00000013125,9606.ENSP00000014914,9606.ENSP00000056217,9606.ENSP00000179259,9606.ENSP00000209728,9606.ENSP00000212015,9606.ENSP00000215631,9606.ENSP00000220751,9606.ENSP00000235382,9606.ENSP00000239223,9606.ENSP00000239938,9606.ENSP00000240100,9606.ENSP00000244869,9606.ENSP00000251849,9606.ENSP00000252809,9606.ENSP00000252992,9606.ENSP00000253063,9606.ENSP00000256458,9606.ENSP00000259808,…	MAP4K5,GPRC5A,ARHGEF5,C12orf5,CDC6,SIRT1,GADD45B,RIPK2,RGS2,DUSP1,EGR1,DUSP4,EREG,RAF1,GDF15,CEP85,SESN2,IRAK2,RIPK1,THBS1,CCND2,MMD,TRAF4,NLRC5,CCNE1,MAP3K8,MAP4K3,CBL,CCNT2,MUL1,ALS2,RAPGEF2,MAP3K13,MAPKAP1,GTF2H1,TNFRSF10B,CDKN2B,NRBF2,PAK1,FBXW7,FLT1,UBASH3B,PRKAG2,BRAF,DUSP2,TGFA,CCNL1,KIAA0226,TSC1,DUSP16,CRK,MIDN,LRP8,CDC25A,ADORA2B,IBTK,YWHAG,ADAM17,ZNF622,TRIB1,CLU,DVL3,PIBF1,HSPH1,RAP2B…
GO:0032270	positive regulation of cellular protein metabolic process	209	1496	0.19	2.77e-07	9606.ENSP00000013125,9606.ENSP00000056217,9606.ENSP00000164227,9606.ENSP00000171111,9606.ENSP00000200453,9606.ENSP00000209728,9606.ENSP00000212015,9606.ENSP00000215631,9606.ENSP00000216037,9606.ENSP00000216797,9606.ENSP00000220325,9606.ENSP00000220751,9606.ENSP00000221566,9606.ENSP00000229416,9606.ENSP00000230990,9606.ENSP00000239938,9606.ENSP00000244869,9606.ENSP00000245907,9606.ENSP00000248244,…	MAP4K5,ARHGEF5,BCL3,KEAP1,PPP1R15A,CDC6,SIRT1,GADD45B,XBP1,NFKBIA,EHD4,RIPK2,SGTA,GCLC,HBEGF,EGR1,EREG,C3,TICAM1,LIF,EGLN3,RAF1,GDF15,IRAK2,EDEM1,AKIRIN2,RIPK1,SDCBP,DCUN1D5,THBS1,BCL2L10,CCND2,SEMA7A,MMD,TRAF4,C19orf10,MAP3K8,BIRC3,ACVR1,MAP4K3,CCNT2,MUL1,ALS2,RAPGEF2,DNAJC27,ICAM1,MAP3K13,ARRDC3,NRP1,MAPKAP1,JDP2,ARRDC4,GAREM,AKAP8,PLK2,DLC1,TNFRSF10B,PAK1,FBXW7,FLT1,NIPBL,SH3RF1,FLCN,NSMCE2,PR…
GO:0031329	regulation of cellular catabolic process	122	743	0.26	3e-07	9606.ENSP00000158771,9606.ENSP00000171111,9606.ENSP00000179259,9606.ENSP00000185150,9606.ENSP00000212015,9606.ENSP00000216037,9606.ENSP00000216117,9606.ENSP00000217402,9606.ENSP00000220592,9606.ENSP00000220751,9606.ENSP00000221086,9606.ENSP00000221566,9606.ENSP00000225235,9606.ENSP00000229416,9606.ENSP00000248244,9606.ENSP00000253063,9606.ENSP00000256497,9606.ENSP00000260130,9606.ENSP00000262384,…	DERL2,KEAP1,C12orf5,ERLEC1,SIRT1,XBP1,HMOX1,CHMP4B,AGO2,RIPK2,MTMR9,SGTA,TBC1D12,GCLC,TICAM1,SESN2,EDEM1,SDCBP,N4BP1,MUL1,PIKFYVE,C18orf8,NPC1,RAB5A,PLK2,CCRN4L,FBXW7,FLCN,NSMCE2,PRKAG2,BTG2,KIAA0226,TSC1,RNF139,DDIT4,PPP1R3B,PDE12,TRIB1,DAB2,ZFAND2A,CLU,TLK2,SAMD4B,RCHY1,RNF166,YOD1,RAB12,DHX34,HSP90AA1,DNAJB2,ATG101,CAV1,RNF41,NRD1,WAC,UVRAG,MYLIP,VCP,NUP214,SUPV3L1,MTCL1,DDA1,MTOR,SMURF1,LRIG2…
GO:1901564	organonitrogen compound metabolic process	593	5281	0.09	5.55e-07	9606.ENSP00000013125,9606.ENSP00000035307,9606.ENSP00000053468,9606.ENSP00000157600,9606.ENSP00000158771,9606.ENSP00000161006,9606.ENSP00000166139,9606.ENSP00000171111,9606.ENSP00000185150,9606.ENSP00000200453,9606.ENSP00000212015,9606.ENSP00000215904,9606.ENSP00000216037,9606.ENSP00000216039,9606.ENSP00000216117,9606.ENSP00000216267,9606.ENSP00000216797,9606.ENSP00000217402,9606.ENSP00000218516,…	MAP4K5,CHPF2,MRPS10,LMCD1,DERL2,PRSS22,FSTL3,KEAP1,ERLEC1,PPP1R15A,SIRT1,PDXP,XBP1,JOSD1,HMOX1,BRD1,NFKBIA,CHMP4B,GLA,PSMD7,AGO2,RIPK2,GSR,SGTA,NAMPT,FKBP14,SETX,PPIF,NFKB1,PDHX,PRDM4,FGFR1OP2,GCLC,HARS2,HBEGF,KLHL18,ODC1,PRDM2,SLC19A2,FBXO30,RNF103,ABCG2,RHOQ,DUSP1,ALG5,DUSP4,KALRN,EGR2,RNF11,ORMDL2,EREG,C3,NR1D1,WNK4,FBXL12,SDF2L1,LIF,DNAJB9,EGLN3,MKNK2,DHX29,RAF1,NUMBL,PPIL4,AOC2,RARA,ILKAP,H3…
GO:0044093	positive regulation of molecular function	231	1713	0.17	5.82e-07	9606.ENSP00000013125,9606.ENSP00000033079,9606.ENSP00000056217,9606.ENSP00000164133,9606.ENSP00000179259,9606.ENSP00000200453,9606.ENSP00000209728,9606.ENSP00000212015,9606.ENSP00000215631,9606.ENSP00000220751,9606.ENSP00000221086,9606.ENSP00000225235,9606.ENSP00000226574,9606.ENSP00000228606,9606.ENSP00000230361,9606.ENSP00000234420,9606.ENSP00000235382,9606.ENSP00000239938,9606.ENSP00000240874,…	MAP4K5,FAM13B,ARHGEF5,PPP2R5B,C12orf5,PPP1R15A,CDC6,SIRT1,GADD45B,RIPK2,MTMR9,TBC1D12,NFKB1,CYP27B1,GUCA1B,MSH6,RGS2,EGR1,KALRN,EREG,TICAM1,EGLN3,RAF1,GDF15,RARA,DNAJB1,EIF2S1,MBD2,IRAK2,AKIRIN2,RIPK1,DCUN1D5,THBS1,BCL2L10,ARHGAP29,PREB,CCND2,MMD,TRIM37,TRAF4,MAP3K8,ARFGAP3,MAP4K3,SLC9A1,CCNT2,MUL1,ALS2,RASGEF1B,RAPGEF2,ICAM1,MAP3K13,ARRDC3,SRF,NRP1,GAL,MAPKAP1,ARRDC4,CRTC3,PLK2,DLC1,TNFRSF10B,PP…
GO:0031327	negative regulation of cellular biosynthetic process	204	1479	0.18	1.03e-06	9606.ENSP00000157600,9606.ENSP00000164227,9606.ENSP00000179259,9606.ENSP00000209728,9606.ENSP00000212015,9606.ENSP00000216037,9606.ENSP00000218516,9606.ENSP00000220592,9606.ENSP00000221452,9606.ENSP00000222329,9606.ENSP00000225688,9606.ENSP00000226574,9606.ENSP00000228606,9606.ENSP00000229416,9606.ENSP00000230321,9606.ENSP00000230990,9606.ENSP00000234198,9606.ENSP00000235382,9606.ENSP00000239223,…	LMCD1,BCL3,C12orf5,CDC6,SIRT1,XBP1,GLA,AGO2,RELB,ERF,RASD1,NFKB1,CYP27B1,GCLC,MDFI,HBEGF,DLX2,RGS2,DUSP1,EGR1,AHR,ORMDL2,SNAI1,EREG,IRF1,INSIG2,FOSB,NR1D1,DLL4,FXR2,JUND,SESN2,RARA,THAP1,DNAJB1,RRP8,H3F3B,EIF2S1,MBD2,BHLHE40,TBX3,BACH2,AKIRIN2,USP2,TRIM37,CCNE1,EPC1,RAPGEF2,MXD1,ASB1,LEF1,SRF,CREM,BTAF1,JDP2,SIK1,FBXW7,NIPBL,TRIM11,FLCN,BTG2,FGF19,ZNF281,REL,MITF,NFIL3,TSC1,RUNX1,JUNB,LRP8,RNF139…
GO:0045859	regulation of protein kinase activity	125	788	0.24	1.11e-06	9606.ENSP00000013125,9606.ENSP00000014914,9606.ENSP00000056217,9606.ENSP00000209728,9606.ENSP00000212015,9606.ENSP00000215631,9606.ENSP00000220751,9606.ENSP00000235382,9606.ENSP00000239223,9606.ENSP00000239938,9606.ENSP00000240100,9606.ENSP00000244869,9606.ENSP00000251849,9606.ENSP00000252809,9606.ENSP00000252992,9606.ENSP00000253063,9606.ENSP00000256458,9606.ENSP00000259808,9606.ENSP00000260356,…	MAP4K5,GPRC5A,ARHGEF5,CDC6,SIRT1,GADD45B,RIPK2,RGS2,DUSP1,EGR1,DUSP4,EREG,RAF1,GDF15,CEP85,SESN2,IRAK2,RIPK1,THBS1,CCND2,MMD,TRAF4,CCNE1,MAP3K8,MAP4K3,CBL,CCNT2,MUL1,ALS2,RAPGEF2,MAP3K13,MAPKAP1,GTF2H1,TNFRSF10B,CDKN2B,PAK1,FBXW7,FLT1,UBASH3B,PRKAG2,BRAF,DUSP2,TGFA,CCNL1,TSC1,DUSP16,CRK,LRP8,CDC25A,ADORA2B,IBTK,YWHAG,ADAM17,TRIB1,CLU,DVL3,PIBF1,HSPH1,RAP2B,MALT1,KARS,CSF1,SOCS3,PDGFB,HSP90AA1,SPD…
GO:0009890	negative regulation of biosynthetic process	206	1501	0.18	1.21e-06	9606.ENSP00000157600,9606.ENSP00000164227,9606.ENSP00000179259,9606.ENSP00000209728,9606.ENSP00000212015,9606.ENSP00000216037,9606.ENSP00000218516,9606.ENSP00000220592,9606.ENSP00000221452,9606.ENSP00000222329,9606.ENSP00000225688,9606.ENSP00000226574,9606.ENSP00000228606,9606.ENSP00000229416,9606.ENSP00000230321,9606.ENSP00000230990,9606.ENSP00000234198,9606.ENSP00000235382,9606.ENSP00000239223,…	LMCD1,BCL3,C12orf5,CDC6,SIRT1,XBP1,GLA,AGO2,RELB,ERF,RASD1,NFKB1,CYP27B1,GCLC,MDFI,HBEGF,DLX2,RGS2,DUSP1,EGR1,AHR,ORMDL2,SNAI1,EREG,IRF1,INSIG2,FOSB,NR1D1,DLL4,FXR2,JUND,SESN2,RARA,THAP1,DNAJB1,RRP8,H3F3B,EIF2S1,MBD2,BHLHE40,TBX3,BACH2,AKIRIN2,USP2,TRIM37,CCNE1,EPC1,RAPGEF2,MXD1,ASB1,LEF1,SRF,CREM,BTAF1,JDP2,SIK1,FBXW7,NIPBL,TRIM11,FLCN,BTG2,FGF19,ZNF281,REL,MITF,NFIL3,TSC1,RUNX1,JUNB,LRP8,RNF139…
GO:0060548	negative regulation of cell death	144	953	0.22	1.35e-06	9606.ENSP00000164227,9606.ENSP00000179259,9606.ENSP00000198767,9606.ENSP00000212015,9606.ENSP00000216037,9606.ENSP00000216117,9606.ENSP00000216489,9606.ENSP00000216797,9606.ENSP00000217402,9606.ENSP00000220751,9606.ENSP00000223095,9606.ENSP00000224140,9606.ENSP00000225174,9606.ENSP00000226574,9606.ENSP00000229416,9606.ENSP00000231668,9606.ENSP00000239223,9606.ENSP00000244050,9606.ENSP00000251849,…	BCL3,C12orf5,RRN3,SIRT1,XBP1,HMOX1,ALKBH1,NFKBIA,CHMP4B,RIPK2,SERPINE1,SETX,PPIF,NFKB1,GCLC,BNIP1,DUSP1,SNAI1,RAF1,RARA,TBX3,RIPK1,IER3,THBS1,BCL2L10,CCND2,ADNP2,C19orf10,IL1A,BIRC3,ACVR1,SLC9A1,CBL,ICAM1,GOLPH3,LEF1,NRP1,NPC1,PLK2,TNFRSF10B,SLC25A4,SH3RF1,BRAF,BTG2,STAT5B,ITGA5,REL,MITF,ANXA5,TSC1,HSP90B1,ANGPTL4,FADD,CEBPB,PDE12,CLCF1,TNFRSF10D,PPARD,CFLAR,DAB2,SPHK1,CLU,EGR3,HSPH1,MALT1,SIAH2,…
GO:0045936	negative regulation of phosphate metabolic process	97	562	0.28	1.39e-06	9606.ENSP00000014914,9606.ENSP00000179259,9606.ENSP00000200453,9606.ENSP00000212015,9606.ENSP00000215631,9606.ENSP00000216037,9606.ENSP00000216629,9606.ENSP00000225174,9606.ENSP00000228515,9606.ENSP00000235382,9606.ENSP00000239223,9606.ENSP00000240100,9606.ENSP00000244230,9606.ENSP00000249075,9606.ENSP00000251691,9606.ENSP00000252992,9606.ENSP00000254037,9606.ENSP00000262809,9606.ENSP00000264033,…	GPRC5A,C12orf5,PPP1R15A,SIRT1,GADD45B,XBP1,BDKRB1,PPIF,CSRNP2,RGS2,DUSP1,DUSP4,MPHOSPH10,LIF,KIAA1244,CEP85,ZCCHC9,ELL,CBL,CDKN2B,PTPRR,UBASH3B,FLCN,PRKAG2,DUSP2,KIAA0226,F2RL1,LMTK2,DUSP16,TERF2IP,MIDN,IBTK,YWHAG,DDIT4,PDE12,BOD1,TRIB1,PER1,SWAP70,PIBF1,HSPH1,SOCS3,PDGFB,RRP1B,CAV1,SFN,ATF3,PMEPA1,PDGFA,KIRREL,ADARB1,ENPP1,MTOR,PPP1R14C,DUSP10,PPP1R15B,EFNA1,EIF3A,DUSP5,GADD45A,JUN,PPAP2B,PTPN1,…
GO:0006915	apoptotic process	139	915	0.22	1.76e-06	9606.ENSP00000064780,9606.ENSP00000164227,9606.ENSP00000179259,9606.ENSP00000200453,9606.ENSP00000202556,9606.ENSP00000212015,9606.ENSP00000215631,9606.ENSP00000216037,9606.ENSP00000216117,9606.ENSP00000216797,9606.ENSP00000220751,9606.ENSP00000225174,9606.ENSP00000226574,9606.ENSP00000228515,9606.ENSP00000229416,9606.ENSP00000231668,9606.ENSP00000234420,9606.ENSP00000238788,9606.ENSP00000242057,…	RELT,BCL3,C12orf5,PPP1R15A,PPP1R13B,SIRT1,GADD45B,XBP1,HMOX1,NFKBIA,RIPK2,PPIF,NFKB1,CSRNP2,GCLC,BNIP1,MSH6,TMEM214,AHR,IRF1,TNFSF9,PLAGL2,TICAM1,EGLN3,MKNK2,RAF1,RRP8,RIPK1,IER3,BCL2L10,TRAF4,ACIN1,C19orf10,IL1A,BIRC3,MUL1,LEF1,PHLDA1,MEF2D,RHOB,CSRNP1,EAF2,DLC1,TNFRSF10B,PAK1,SLC25A4,SH3RF1,SHISA5,FADD,IL12A,CEBPB,PRKCE,DDIT4,CYCS,ZNF622,TNFRSF10D,PPARD,CFLAR,DAB2,CLU,STK17A,SIAH2,HSPA5,PMAIP1,…
GO:0010942	positive regulation of cell death	109	663	0.26	1.78e-06	9606.ENSP00000056217,9606.ENSP00000179259,9606.ENSP00000202556,9606.ENSP00000212015,9606.ENSP00000215631,9606.ENSP00000216037,9606.ENSP00000216117,9606.ENSP00000216373,9606.ENSP00000220751,9606.ENSP00000225174,9606.ENSP00000239223,9606.ENSP00000239938,9606.ENSP00000240874,9606.ENSP00000246229,9606.ENSP00000250457,9606.ENSP00000256015,9606.ENSP00000256383,9606.ENSP00000259808,9606.ENSP00000260356,…	ARHGEF5,C12orf5,PPP1R13B,SIRT1,GADD45B,XBP1,HMOX1,SOS2,RIPK2,PPIF,DUSP1,EGR1,KALRN,PLAGL2,EGLN3,BTG1,EIF2S1,RIPK1,THBS1,BCL2L10,ACIN1,SLC9A1,MUL1,RAPGEF2,GAL,SIK1,RHOB,DLC1,TNFRSF10B,FBXW7,FLCN,FADD,IL12A,FOS,YWHAG,EIF2AK3,DDIT4,CYCS,ZNF622,FOSL1,CLU,SSH1,STK17A,DCUN1D3,PMAIP1,TNFRSF12A,ALDH1A3,SMAD3,RRP1B,CAV1,TRIO,PLAUR,SFN,TP53BP2,ATF3,NET1,VCP,MTOR,AKAP13,OSGIN1,CTGF,PEA15,MCL1,BCL10,GADD45A,…
GO:0001817	regulation of cytokine production	103	615	0.27	1.9e-06	9606.ENSP00000164227,9606.ENSP00000216037,9606.ENSP00000216117,9606.ENSP00000220751,9606.ENSP00000221452,9606.ENSP00000223095,9606.ENSP00000226574,9606.ENSP00000229332,9606.ENSP00000232496,9606.ENSP00000239882,9606.ENSP00000239938,9606.ENSP00000244869,9606.ENSP00000245414,9606.ENSP00000245907,9606.ENSP00000248244,9606.ENSP00000254066,9606.ENSP00000257787,9606.ENSP00000259808,9606.ENSP00000260356,…	BCL3,XBP1,HMOX1,RIPK2,RELB,SERPINE1,NFKB1,CLEC4A,TUSC2,ELF1,EGR1,EREG,IRF1,C3,TICAM1,RARA,AKIRIN2,RIPK1,THBS1,RORA,SEMA7A,NLRC5,UFD1L,IL1A,BIRC3,MUL1,ASB1,LEF1,AKAP8,PPM1B,STAT5B,REL,F2RL1,RUNX1,FADD,IL12A,ADORA2B,CEBPB,EIF2AK3,ADAM17,HEG1,SPHK1,PER1,CLU,PIBF1,MALT1,KARS,NPLOC4,PDE4B,SMAD3,POLR3C,RIOK3,MAP2K3,BTN2A2,TRIM38,ANKRD17,PELI1,GPATCH3,MAPKAPK2,F11R,IL6R,NFKB2,CHUK,BCL10,POLR3A,ZC3H12A,K…
GO:0002831	regulation of response to biotic stimulus	79	426	0.31	2.05e-06	9606.ENSP00000179259,9606.ENSP00000216797,9606.ENSP00000220751,9606.ENSP00000221452,9606.ENSP00000226574,9606.ENSP00000229332,9606.ENSP00000244869,9606.ENSP00000245414,9606.ENSP00000246672,9606.ENSP00000248244,9606.ENSP00000251849,9606.ENSP00000252229,9606.ENSP00000256458,9606.ENSP00000257604,9606.ENSP00000259808,9606.ENSP00000262039,9606.ENSP00000262510,9606.ENSP00000263202,9606.ENSP00000263464,…	C12orf5,NFKBIA,RIPK2,RELB,NFKB1,CLEC4A,EREG,IRF1,NR1D1,TICAM1,RAF1,MICB,IRAK2,TRAFD1,RIPK1,PIK3C3,NLRC5,UFD1L,BIRC3,MUL1,PAK1,PPM1B,OTULIN,IFNGR2,STAT5B,F2RL1,HSP90B1,CRK,FADD,IL12A,PRKCE,TRIB1,MALT1,IFNLR1,SOCS3,NPLOC4,POLR3C,CAV1,RIOK3,CREB3,PSPC1,TRIM38,ANKRD17,PELI1,GPATCH3,DUSP10,MAPKAPK2,PRDM1,CHUK,BCL10,PTPN1,ZC3H12A,HSPA1B,HLA-E,OPTN,DDX58,TRIM5,SERPINB9,GPS2,CD274,RSAD2,SEC14L1,AP1G1,POL…
GO:0000122	negative regulation of transcription by RNA polymerase II	126	809	0.23	2.29e-06	9606.ENSP00000157600,9606.ENSP00000212015,9606.ENSP00000216037,9606.ENSP00000221452,9606.ENSP00000222329,9606.ENSP00000226574,9606.ENSP00000230321,9606.ENSP00000234198,9606.ENSP00000239938,9606.ENSP00000244050,9606.ENSP00000245919,9606.ENSP00000246672,9606.ENSP00000249749,9606.ENSP00000252818,9606.ENSP00000254066,9606.ENSP00000254250,9606.ENSP00000254322,9606.ENSP00000256429,9606.ENSP00000256495,…	LMCD1,SIRT1,XBP1,RELB,ERF,NFKB1,MDFI,DLX2,EGR1,SNAI1,FOSB,NR1D1,DLL4,JUND,RARA,THAP1,DNAJB1,MBD2,BHLHE40,TBX3,BACH2,AKIRIN2,USP2,TRIM37,CCNE1,EPC1,MXD1,LEF1,SRF,CREM,JDP2,NIPBL,FLCN,BTG2,ZNF281,REL,MITF,NFIL3,RUNX1,JUNB,LRP8,CEBPB,ZBTB5,ZNF608,ZNF239,MEPCE,ZNF431,NR1D2,PPARD,PER1,ZHX2,USP9X,CALR,RNF168,PDGFB,SMAD3,ZNF202,OVOL1,GZF1,CAV1,JARID2,ZNF189,MCPH1,ZNF136,ATF3,NR4A2,MAFK,ZNF140,NRARP,ARID…
GO:0051338	regulation of transferase activity	144	964	0.22	2.38e-06	9606.ENSP00000013125,9606.ENSP00000014914,9606.ENSP00000056217,9606.ENSP00000179259,9606.ENSP00000209728,9606.ENSP00000212015,9606.ENSP00000215631,9606.ENSP00000220751,9606.ENSP00000235382,9606.ENSP00000239223,9606.ENSP00000239938,9606.ENSP00000240100,9606.ENSP00000244869,9606.ENSP00000251849,9606.ENSP00000252809,9606.ENSP00000252992,9606.ENSP00000253063,9606.ENSP00000256458,9606.ENSP00000259808,…	MAP4K5,GPRC5A,ARHGEF5,C12orf5,CDC6,SIRT1,GADD45B,RIPK2,RGS2,DUSP1,EGR1,DUSP4,EREG,RAF1,GDF15,CEP85,SESN2,IRAK2,RIPK1,DCUN1D5,THBS1,CCND2,MMD,TRAF4,NLRC5,CCNE1,MAP3K8,MAP4K3,CBL,CCNT2,MUL1,ALS2,RAPGEF2,MAP3K13,ARRDC3,MAPKAP1,GTF2H1,ARRDC4,FEM1A,TNFRSF10B,CDKN2B,NRBF2,PAK1,FBXW7,FLT1,UBASH3B,PRKAG2,BRAF,DUSP2,TGFA,CCNL1,KIAA0226,TSC1,DUSP16,CRK,MIDN,LRP8,CDC25A,ADORA2B,IBTK,YWHAG,ADAM17,ZNF622,TRIB…
GO:0043085	positive regulation of catalytic activity	191	1381	0.18	2.39e-06	9606.ENSP00000013125,9606.ENSP00000033079,9606.ENSP00000056217,9606.ENSP00000179259,9606.ENSP00000200453,9606.ENSP00000209728,9606.ENSP00000212015,9606.ENSP00000215631,9606.ENSP00000220751,9606.ENSP00000221086,9606.ENSP00000225235,9606.ENSP00000228606,9606.ENSP00000230361,9606.ENSP00000234420,9606.ENSP00000235382,9606.ENSP00000239938,9606.ENSP00000240874,9606.ENSP00000244869,9606.ENSP00000250457,…	MAP4K5,FAM13B,ARHGEF5,C12orf5,PPP1R15A,CDC6,SIRT1,GADD45B,RIPK2,MTMR9,TBC1D12,CYP27B1,GUCA1B,MSH6,RGS2,EGR1,KALRN,EREG,EGLN3,RAF1,GDF15,DNAJB1,IRAK2,AKIRIN2,RIPK1,DCUN1D5,THBS1,BCL2L10,ARHGAP29,PREB,CCND2,MMD,TRAF4,MAP3K8,ARFGAP3,MAP4K3,CCNT2,MUL1,ALS2,RASGEF1B,RAPGEF2,ICAM1,MAP3K13,ARRDC3,NRP1,MAPKAP1,ARRDC4,DLC1,TNFRSF10B,PAK1,FBXW7,FLT1,PRKAG2,BRAF,ARHGAP17,CDC42EP3,TGFA,CCNL1,PCOLCE2,F2RL1,TS…
GO:1905897	regulation of response to endoplasmic reticulum stress	28	81	0.58	2.94e-06	9606.ENSP00000158771,9606.ENSP00000185150,9606.ENSP00000200453,9606.ENSP00000212015,9606.ENSP00000216037,9606.ENSP00000221566,9606.ENSP00000249356,9606.ENSP00000256497,9606.ENSP00000307235,9606.ENSP00000315130,9606.ENSP00000324173,9606.ENSP00000326119,9606.ENSP00000326813,9606.ENSP00000339191,9606.ENSP00000342136,9606.ENSP00000356156,9606.ENSP00000360683,9606.ENSP00000363591,9606.ENSP00000366395,…	DERL2,ERLEC1,PPP1R15A,SIRT1,XBP1,SGTA,DNAJB9,EDEM1,EIF2AK3,CLU,HSPA5,PMAIP1,YOD1,CAV1,CREB3,PPP1R15B,PTPN1,BAK1,SYVN1,NFE2L2,VIMP,USP25,HERPUD1,MANF,FICD,DDIT3,UBE2J1,DNAJC3
GO:0051090	regulation of DNA-binding transcription factor activity	75	403	0.31	3.87e-06	9606.ENSP00000056217,9606.ENSP00000164133,9606.ENSP00000171111,9606.ENSP00000212015,9606.ENSP00000216117,9606.ENSP00000216797,9606.ENSP00000220751,9606.ENSP00000226574,9606.ENSP00000230321,9606.ENSP00000248244,9606.ENSP00000256458,9606.ENSP00000256495,9606.ENSP00000259808,9606.ENSP00000262294,9606.ENSP00000262510,9606.ENSP00000264832,9606.ENSP00000265026,9606.ENSP00000265354,9606.ENSP00000268184,…	ARHGEF5,PPP2R5B,KEAP1,SIRT1,HMOX1,NFKBIA,RIPK2,NFKB1,MDFI,TICAM1,IRAK2,BHLHE40,RIPK1,TRIM37,NLRC5,ICAM1,MAP3K13,SRF,CRTC3,SIK1,NFKBIE,PPRC1,OTULIN,RNF25,TERF2IP,RHEBL1,LRP8,FOS,ZNF431,FOSL1,TRIB1,CFLAR,SPHK1,CLU,MALT1,RIPK4,SMAD3,CREB3,RNF41,TRIM38,PELI1,PROX1,SGK1,DDR2,NFKB2,BTRC,CHUK,BCL10,JUN,PPAP2B,ZC3H12A,PIM1,KLF4,HSPA1B,RGCC,EDN1,DDX58,TRIM5,SGK3,MED13,KDM5A,RELA,HIPK2,TLR6,CYLD,BRMS1,TRAF…
GO:0043069	negative regulation of programmed cell death	132	873	0.22	4.75e-06	9606.ENSP00000164227,9606.ENSP00000179259,9606.ENSP00000198767,9606.ENSP00000212015,9606.ENSP00000216037,9606.ENSP00000216117,9606.ENSP00000216489,9606.ENSP00000216797,9606.ENSP00000220751,9606.ENSP00000223095,9606.ENSP00000224140,9606.ENSP00000225174,9606.ENSP00000226574,9606.ENSP00000229416,9606.ENSP00000231668,9606.ENSP00000239223,9606.ENSP00000244050,9606.ENSP00000251849,9606.ENSP00000254066,…	BCL3,C12orf5,RRN3,SIRT1,XBP1,HMOX1,ALKBH1,NFKBIA,RIPK2,SERPINE1,SETX,PPIF,NFKB1,GCLC,BNIP1,DUSP1,SNAI1,RAF1,RARA,TBX3,RIPK1,IER3,THBS1,BCL2L10,CCND2,C19orf10,IL1A,BIRC3,ACVR1,SLC9A1,CBL,ICAM1,GOLPH3,LEF1,NRP1,PLK2,TNFRSF10B,SLC25A4,SH3RF1,BRAF,BTG2,STAT5B,ITGA5,MITF,ANXA5,HSP90B1,ANGPTL4,FADD,CEBPB,CLCF1,TNFRSF10D,PPARD,CFLAR,DAB2,SPHK1,CLU,EGR3,HSPH1,MALT1,SIAH2,HSPA5,SOCS3,SMAD3,ARHGAP10,CAV1,P…
GO:0043066	negative regulation of apoptotic process	130	859	0.22	5.68e-06	9606.ENSP00000164227,9606.ENSP00000198767,9606.ENSP00000212015,9606.ENSP00000216037,9606.ENSP00000216117,9606.ENSP00000216489,9606.ENSP00000216797,9606.ENSP00000220751,9606.ENSP00000223095,9606.ENSP00000224140,9606.ENSP00000225174,9606.ENSP00000226574,9606.ENSP00000229416,9606.ENSP00000231668,9606.ENSP00000239223,9606.ENSP00000244050,9606.ENSP00000251849,9606.ENSP00000254066,9606.ENSP00000257566,…	BCL3,RRN3,SIRT1,XBP1,HMOX1,ALKBH1,NFKBIA,RIPK2,SERPINE1,SETX,PPIF,NFKB1,GCLC,BNIP1,DUSP1,SNAI1,RAF1,RARA,TBX3,RIPK1,IER3,THBS1,BCL2L10,CCND2,C19orf10,IL1A,BIRC3,ACVR1,SLC9A1,CBL,ICAM1,GOLPH3,LEF1,NRP1,PLK2,TNFRSF10B,SH3RF1,BRAF,BTG2,STAT5B,ITGA5,MITF,ANXA5,HSP90B1,ANGPTL4,FADD,CEBPB,CLCF1,TNFRSF10D,PPARD,CFLAR,DAB2,SPHK1,CLU,EGR3,HSPH1,MALT1,SIAH2,HSPA5,SOCS3,SMAD3,ARHGAP10,CAV1,PLAUR,SFN,CREB3,N…
GO:0031400	negative regulation of protein modification process	98	592	0.26	6.28e-06	9606.ENSP00000014914,9606.ENSP00000200453,9606.ENSP00000212015,9606.ENSP00000215631,9606.ENSP00000216037,9606.ENSP00000216629,9606.ENSP00000229416,9606.ENSP00000235382,9606.ENSP00000239223,9606.ENSP00000240100,9606.ENSP00000249075,9606.ENSP00000252992,9606.ENSP00000262384,9606.ENSP00000264033,9606.ENSP00000276925,9606.ENSP00000283228,9606.ENSP00000284273,9606.ENSP00000285071,9606.ENSP00000287878,…	GPRC5A,PPP1R15A,SIRT1,GADD45B,XBP1,BDKRB1,GCLC,RGS2,DUSP1,DUSP4,LIF,CEP85,N4BP1,CBL,CDKN2B,PTPRR,UBASH3B,FLCN,PRKAG2,DUSP2,KLF15,SENP2,F2RL1,LMTK2,DUSP16,TERF2IP,IBTK,PRKCE,YWHAG,DDIT4,BOD1,TRIB1,PER1,SWAP70,PIBF1,HSPH1,PINX1,SUPT6H,SOCS3,DNAJB2,CAV1,SFN,JARID2,ATF3,PMEPA1,KIRREL,ADARB1,ENPP1,MTOR,PPP1R14C,DUSP10,PPP1R15B,EFNA1,EIF3A,DUSP5,GADD45A,JUN,PPAP2B,PTPN1,RAPGEF1,ZC3H12A,DKK1,BAK1,KLF4,P…
GO:0071496	cellular response to external stimulus	61	305	0.34	7.43e-06	9606.ENSP00000212015,9606.ENSP00000215904,9606.ENSP00000216037,9606.ENSP00000216117,9606.ENSP00000226574,9606.ENSP00000229416,9606.ENSP00000245414,9606.ENSP00000253063,9606.ENSP00000254605,9606.ENSP00000256383,9606.ENSP00000262039,9606.ENSP00000263980,9606.ENSP00000264033,9606.ENSP00000264832,9606.ENSP00000265354,9606.ENSP00000266458,9606.ENSP00000276431,9606.ENSP00000276925,9606.ENSP00000297991,…	SIRT1,PDXP,XBP1,HMOX1,NFKB1,GCLC,IRF1,SESN2,RRP8,EIF2S1,PIK3C3,SLC9A1,CBL,ICAM1,SRF,GABARAPL1,TNFRSF10B,CDKN2B,AQP3,TSC1,HSP90B1,FADD,FOXA3,ADORA2B,FOS,PPM1D,EIF2AK3,TBL2,FOSL1,SSH1,HSPA5,PMAIP1,UPP1,CAV1,MIOS,ATF3,NR4A2,P2RX4,MTOR,NUAK2,GLRX2,BAG3,BCL10,GADD45A,JUN,ANKRD1,RRAGC,ZC3H12A,PIM1,BAK1,HABP4,NFE2L2,MTMR3,CDKN1A,ATP2B1,CADPS2,MAP2K4,FNIP1,ZFYVE1,BHLHA15,MAP3K14
GO:0042326	negative regulation of phosphorylation	81	458	0.29	7.51e-06	9606.ENSP00000014914,9606.ENSP00000179259,9606.ENSP00000212015,9606.ENSP00000215631,9606.ENSP00000216037,9606.ENSP00000216629,9606.ENSP00000225174,9606.ENSP00000235382,9606.ENSP00000239223,9606.ENSP00000240100,9606.ENSP00000249075,9606.ENSP00000252992,9606.ENSP00000264033,9606.ENSP00000276925,9606.ENSP00000283228,9606.ENSP00000284273,9606.ENSP00000285071,9606.ENSP00000287878,9606.ENSP00000288943,…	GPRC5A,C12orf5,SIRT1,GADD45B,XBP1,BDKRB1,PPIF,RGS2,DUSP1,DUSP4,LIF,CEP85,CBL,CDKN2B,PTPRR,UBASH3B,FLCN,PRKAG2,DUSP2,KIAA0226,F2RL1,DUSP16,TERF2IP,MIDN,IBTK,YWHAG,DDIT4,PDE12,TRIB1,PER1,PIBF1,HSPH1,SOCS3,CAV1,SFN,ATF3,PMEPA1,KIRREL,ADARB1,ENPP1,MTOR,DUSP10,PPP1R15B,EFNA1,EIF3A,DUSP5,GADD45A,JUN,PPAP2B,PTPN1,RAPGEF1,ZC3H12A,DKK1,BAK1,KLF4,PARD3,IRS2,SPRY2,ERRFI1,FLRT3,XDH,GPS2,IGFBP3,LATS2,SH3BP5,M…
GO:2000113	negative regulation of cellular macromolecule biosynthetic process	184	1348	0.18	9.27e-06	9606.ENSP00000157600,9606.ENSP00000164227,9606.ENSP00000209728,9606.ENSP00000212015,9606.ENSP00000216037,9606.ENSP00000220592,9606.ENSP00000221452,9606.ENSP00000222329,9606.ENSP00000225688,9606.ENSP00000226574,9606.ENSP00000229416,9606.ENSP00000230321,9606.ENSP00000230990,9606.ENSP00000234198,9606.ENSP00000235382,9606.ENSP00000239223,9606.ENSP00000239938,9606.ENSP00000242057,9606.ENSP00000244050,…	LMCD1,BCL3,CDC6,SIRT1,XBP1,AGO2,RELB,ERF,RASD1,NFKB1,GCLC,MDFI,HBEGF,DLX2,RGS2,DUSP1,EGR1,AHR,SNAI1,EREG,IRF1,FOSB,NR1D1,DLL4,FXR2,JUND,SESN2,RARA,THAP1,DNAJB1,RRP8,H3F3B,EIF2S1,MBD2,BHLHE40,TBX3,BACH2,AKIRIN2,USP2,TRIM37,CCNE1,EPC1,MXD1,LEF1,SRF,CREM,BTAF1,JDP2,FBXW7,NIPBL,TRIM11,FLCN,BTG2,ZNF281,REL,MITF,NFIL3,TSC1,RUNX1,JUNB,LRP8,RNF139,CEBPB,PPM1D,EIF2AK3,ZBTB5,ZNF608,ZNF239,MEPCE,ZNF431,NR1D…
GO:0030163	protein catabolic process	100	615	0.25	9.61e-06	9606.ENSP00000158771,9606.ENSP00000171111,9606.ENSP00000185150,9606.ENSP00000212015,9606.ENSP00000216037,9606.ENSP00000217402,9606.ENSP00000219313,9606.ENSP00000221566,9606.ENSP00000237455,9606.ENSP00000242719,9606.ENSP00000246672,9606.ENSP00000247977,9606.ENSP00000248958,9606.ENSP00000249356,9606.ENSP00000256257,9606.ENSP00000256497,9606.ENSP00000259335,9606.ENSP00000259808,9606.ENSP00000260187,…	DERL2,KEAP1,ERLEC1,SIRT1,XBP1,CHMP4B,PSMD7,SGTA,RNF103,RNF11,NR1D1,FBXL12,SDF2L1,DNAJB9,RNF122,EDEM1,KIAA0368,RIPK1,USP2,PSMD11,FAF2,UFD1L,CBL,PSMD3,GET4,BTBD11,FBXW7,USP12,TMEM199,UBAP1,HSP90B1,KCTD5,RNF139,RNF181,FBXO45,KCTD2,KLHL11,TOLLIP,CLU,USP9X,RBBP6,VPS37A,RNF168,RCHY1,SIAH2,HSPA5,PMAIP1,YOD1,CLN8,NPLOC4,RAB12,HSP90AA1,KLHL25,DNAJB2,KCTD21,RNF41,KCTD6,UBE2H,MYLIP,TRIM38,VCP,ZRANB1,TOPORS,…
GO:0045088	regulation of innate immune response	68	361	0.32	1.01e-05	9606.ENSP00000216797,9606.ENSP00000220751,9606.ENSP00000221452,9606.ENSP00000226574,9606.ENSP00000229332,9606.ENSP00000244869,9606.ENSP00000245414,9606.ENSP00000246672,9606.ENSP00000248244,9606.ENSP00000251849,9606.ENSP00000256458,9606.ENSP00000257604,9606.ENSP00000259808,9606.ENSP00000262039,9606.ENSP00000262510,9606.ENSP00000263202,9606.ENSP00000263464,9606.ENSP00000264198,9606.ENSP00000278568,…	NFKBIA,RIPK2,RELB,NFKB1,CLEC4A,EREG,IRF1,NR1D1,TICAM1,RAF1,IRAK2,TRAFD1,RIPK1,PIK3C3,NLRC5,UFD1L,BIRC3,MUL1,PAK1,OTULIN,IFNGR2,STAT5B,F2RL1,HSP90B1,CRK,FADD,IL12A,PRKCE,MALT1,SOCS3,NPLOC4,POLR3C,CAV1,RIOK3,PSPC1,ANKRD17,PELI1,GPATCH3,DUSP10,MAPKAPK2,CHUK,BCL10,PTPN1,HSPA1B,HLA-E,DDX58,TRIM5,SERPINB9,GPS2,RSAD2,SEC14L1,AP1G1,POLR3D,RELA,TLR6,CYLD,PVR,MICA,MUC20,MUC4,TRAF6,UBC,TRAF3,BIRC2,RPS6KA5,I…
GO:0010558	negative regulation of macromolecule biosynthetic process	192	1425	0.17	1.08e-05	9606.ENSP00000157600,9606.ENSP00000164227,9606.ENSP00000209728,9606.ENSP00000212015,9606.ENSP00000216037,9606.ENSP00000220592,9606.ENSP00000221452,9606.ENSP00000222329,9606.ENSP00000225688,9606.ENSP00000226574,9606.ENSP00000229416,9606.ENSP00000230321,9606.ENSP00000230990,9606.ENSP00000234198,9606.ENSP00000235382,9606.ENSP00000239223,9606.ENSP00000239938,9606.ENSP00000242057,9606.ENSP00000244050,…	LMCD1,BCL3,CDC6,SIRT1,XBP1,AGO2,RELB,ERF,RASD1,NFKB1,GCLC,MDFI,HBEGF,DLX2,RGS2,DUSP1,EGR1,AHR,SNAI1,EREG,IRF1,FOSB,NR1D1,DLL4,FXR2,JUND,SESN2,RARA,THAP1,DNAJB1,RRP8,H3F3B,EIF2S1,MBD2,BHLHE40,TBX3,BACH2,AKIRIN2,USP2,TRIM37,CCNE1,EPC1,MXD1,ASB1,LEF1,SRF,CREM,BTAF1,JDP2,FBXW7,NIPBL,TRIM11,FLCN,BTG2,ZNF281,REL,MITF,NFIL3,TSC1,RUNX1,JUNB,LRP8,RNF139,CEBPB,PPM1D,EIF2AK3,ZBTB5,ZNF608,ZNF239,MEPCE,ZNF431…
GO:0043068	positive regulation of programmed cell death	99	610	0.25	1.17e-05	9606.ENSP00000056217,9606.ENSP00000179259,9606.ENSP00000202556,9606.ENSP00000212015,9606.ENSP00000215631,9606.ENSP00000216037,9606.ENSP00000216117,9606.ENSP00000216373,9606.ENSP00000220751,9606.ENSP00000225174,9606.ENSP00000239223,9606.ENSP00000240874,9606.ENSP00000246229,9606.ENSP00000250457,9606.ENSP00000256015,9606.ENSP00000256383,9606.ENSP00000259808,9606.ENSP00000260356,9606.ENSP00000260442,…	ARHGEF5,C12orf5,PPP1R13B,SIRT1,GADD45B,XBP1,HMOX1,SOS2,RIPK2,PPIF,DUSP1,KALRN,PLAGL2,EGLN3,BTG1,EIF2S1,RIPK1,THBS1,BCL2L10,ACIN1,SLC9A1,MUL1,RAPGEF2,GAL,SIK1,RHOB,DLC1,TNFRSF10B,FBXW7,FLCN,FADD,IL12A,YWHAG,EIF2AK3,CYCS,ZNF622,FOSL1,CLU,STK17A,DCUN1D3,PMAIP1,TNFRSF12A,ALDH1A3,SMAD3,RRP1B,CAV1,TRIO,PLAUR,SFN,TP53BP2,ATF3,NET1,VCP,AKAP13,OSGIN1,CTGF,PEA15,MCL1,BCL10,GADD45A,JUN,ANKRD1,ZC3H12A,MTCH1,…
GO:0048584	positive regulation of response to stimulus	259	2054	0.14	1.17e-05	9606.ENSP00000013125,9606.ENSP00000056217,9606.ENSP00000157600,9606.ENSP00000164133,9606.ENSP00000179259,9606.ENSP00000200453,9606.ENSP00000202556,9606.ENSP00000212015,9606.ENSP00000215631,9606.ENSP00000216037,9606.ENSP00000216373,9606.ENSP00000216797,9606.ENSP00000220751,9606.ENSP00000221452,9606.ENSP00000221566,9606.ENSP00000223095,9606.ENSP00000225174,9606.ENSP00000226574,9606.ENSP00000228606,…	MAP4K5,ARHGEF5,LMCD1,PPP2R5B,C12orf5,PPP1R15A,PPP1R13B,SIRT1,GADD45B,XBP1,SOS2,NFKBIA,RIPK2,RELB,SGTA,SERPINE1,PPIF,NFKB1,CYP27B1,CLEC4A,HBEGF,MSH6,EREG,C3,PLAGL2,TICAM1,LIF,DLL4,RAF1,MICB,GDF15,RARA,JAG1,MBD2,IRAK2,EDEM1,RIPK1,SDCBP,THBS1,SEMA7A,PIK3C3,TRAF4,NLRC5,VAMP7,C19orf10,MAP3K8,BRD4,BIRC3,ACVR1,MAP4K3,SLC9A1,CBL,MUL1,ALS2,RAPGEF2,DNAJC27,ICAM1,MAP3K13,GOLPH3,NRP1,GAL,EIF2B2,GAREM,PELO,TN…
GO:0071900	regulation of protein serine/threonine kinase activity	84	488	0.28	1.17e-05	9606.ENSP00000013125,9606.ENSP00000056217,9606.ENSP00000209728,9606.ENSP00000212015,9606.ENSP00000215631,9606.ENSP00000220751,9606.ENSP00000235382,9606.ENSP00000239223,9606.ENSP00000240100,9606.ENSP00000251849,9606.ENSP00000252809,9606.ENSP00000253063,9606.ENSP00000256458,9606.ENSP00000259808,9606.ENSP00000260356,9606.ENSP00000261254,9606.ENSP00000263056,9606.ENSP00000263881,9606.ENSP00000264157,…	MAP4K5,ARHGEF5,CDC6,SIRT1,GADD45B,RIPK2,RGS2,DUSP1,DUSP4,RAF1,GDF15,SESN2,IRAK2,RIPK1,THBS1,CCND2,MAP3K8,MAP4K3,CCNT2,MUL1,ALS2,RAPGEF2,MAP3K13,GTF2H1,CDKN2B,PAK1,FLT1,PRKAG2,BRAF,DUSP2,TGFA,CCNL1,DUSP16,CRK,CDC25A,ADORA2B,YWHAG,ADAM17,TRIB1,DVL3,KARS,PDGFB,SPDYA,CAV1,SFN,CCNYL1,MAP2K3,PDGFA,UVRAG,SERTAD1,AKAP13,DUSP10,PROX1,MAPKAPK2,PEA15,DUSP5,AVPI1,GADD45A,PTPN1,RAPGEF1,PIM1,DKK1,SPRY2,BMP2,RG…
GO:0001558	regulation of cell growth	73	402	0.3	1.22e-05	9606.ENSP00000158771,9606.ENSP00000212015,9606.ENSP00000216037,9606.ENSP00000216629,9606.ENSP00000228606,9606.ENSP00000230990,9606.ENSP00000235382,9606.ENSP00000253063,9606.ENSP00000254810,9606.ENSP00000256015,9606.ENSP00000260130,9606.ENSP00000261918,9606.ENSP00000262198,9606.ENSP00000263980,9606.ENSP00000264198,9606.ENSP00000265165,9606.ENSP00000265342,9606.ENSP00000265354,9606.ENSP00000265371,…	DERL2,SIRT1,XBP1,BDKRB1,CYP27B1,HBEGF,RGS2,SESN2,H3F3B,BTG1,SDCBP,SEMA7A,ADNP2,SLC9A1,MUL1,LEF1,FSTL4,SRF,NRP1,GAL,CLSTN3,EAF2,PAK1,FLCN,CRK,SLC25A33,ADAM17,PPARD,SPHK1,DCUN1D3,SERTAD3,TNFRSF12A,SMAD3,NDEL1,DNAJB2,SFN,CREB3,NET1,GOLGA4,ADIPOR2,SUPV3L1,MAP2,ENPP1,MTOR,SMURF1,INO80,OSGIN1,SGK1,CTGF,TSPYL2,HSPA1B,ING1,EDN1,CDKL5,TAF9,IGFBP3,SGK3,PLAA,NEDD4L,BCL6,CDK11A,CDKN1A,SH3BP4,BCAR1,NANOS1,OSG…
GO:0044257	cellular protein catabolic process	93	562	0.26	1.25e-05	9606.ENSP00000158771,9606.ENSP00000171111,9606.ENSP00000185150,9606.ENSP00000212015,9606.ENSP00000216037,9606.ENSP00000217402,9606.ENSP00000219313,9606.ENSP00000221566,9606.ENSP00000237455,9606.ENSP00000242719,9606.ENSP00000246672,9606.ENSP00000247977,9606.ENSP00000248958,9606.ENSP00000249356,9606.ENSP00000256257,9606.ENSP00000256497,9606.ENSP00000259335,9606.ENSP00000259808,9606.ENSP00000260187,…	DERL2,KEAP1,ERLEC1,SIRT1,XBP1,CHMP4B,PSMD7,SGTA,RNF103,RNF11,NR1D1,FBXL12,SDF2L1,DNAJB9,RNF122,EDEM1,KIAA0368,RIPK1,USP2,PSMD11,FAF2,UFD1L,CBL,PSMD3,GET4,BTBD11,FBXW7,USP12,TMEM199,UBAP1,HSP90B1,KCTD5,RNF139,RNF181,FBXO45,KCTD2,KLHL11,TOLLIP,USP9X,RBBP6,VPS37A,RNF168,RCHY1,SIAH2,HSPA5,PMAIP1,YOD1,NPLOC4,RAB12,KLHL25,DNAJB2,KCTD21,RNF41,KCTD6,UBE2H,MYLIP,TRIM38,VCP,ZRANB1,TOPORS,SMURF1,BTRC,TP53IN…
GO:0031401	positive regulation of protein modification process	161	1149	0.19	1.32e-05	9606.ENSP00000013125,9606.ENSP00000056217,9606.ENSP00000200453,9606.ENSP00000209728,9606.ENSP00000212015,9606.ENSP00000215631,9606.ENSP00000216037,9606.ENSP00000220325,9606.ENSP00000220751,9606.ENSP00000230990,9606.ENSP00000239938,9606.ENSP00000244869,9606.ENSP00000245907,9606.ENSP00000248244,9606.ENSP00000249075,9606.ENSP00000251849,9606.ENSP00000252809,9606.ENSP00000256458,9606.ENSP00000259808,…	MAP4K5,ARHGEF5,PPP1R15A,CDC6,SIRT1,GADD45B,XBP1,EHD4,RIPK2,HBEGF,EGR1,EREG,C3,TICAM1,LIF,RAF1,GDF15,IRAK2,RIPK1,SDCBP,DCUN1D5,THBS1,CCND2,SEMA7A,MMD,TRAF4,C19orf10,MAP3K8,BIRC3,ACVR1,MAP4K3,CCNT2,MUL1,ALS2,RAPGEF2,DNAJC27,ICAM1,MAP3K13,ARRDC3,NRP1,MAPKAP1,JDP2,ARRDC4,GAREM,AKAP8,DLC1,TNFRSF10B,PAK1,FBXW7,FLT1,NIPBL,SH3RF1,FLCN,PRKAG2,BRAF,ITGA5,FGF19,TGFA,CCNL1,SENP2,F2RL1,TERF2IP,CRK,IL12A,FNTA,…
GO:0043065	positive regulation of apoptotic process	98	604	0.25	1.32e-05	9606.ENSP00000056217,9606.ENSP00000179259,9606.ENSP00000202556,9606.ENSP00000212015,9606.ENSP00000215631,9606.ENSP00000216037,9606.ENSP00000216117,9606.ENSP00000216373,9606.ENSP00000220751,9606.ENSP00000225174,9606.ENSP00000239223,9606.ENSP00000240874,9606.ENSP00000246229,9606.ENSP00000250457,9606.ENSP00000256015,9606.ENSP00000256383,9606.ENSP00000259808,9606.ENSP00000260356,9606.ENSP00000260442,…	ARHGEF5,C12orf5,PPP1R13B,SIRT1,GADD45B,XBP1,HMOX1,SOS2,RIPK2,PPIF,DUSP1,KALRN,PLAGL2,EGLN3,BTG1,EIF2S1,RIPK1,THBS1,BCL2L10,ACIN1,SLC9A1,MUL1,RAPGEF2,GAL,SIK1,RHOB,DLC1,TNFRSF10B,FBXW7,FLCN,FADD,IL12A,YWHAG,EIF2AK3,CYCS,ZNF622,FOSL1,CLU,STK17A,DCUN1D3,PMAIP1,TNFRSF12A,ALDH1A3,SMAD3,RRP1B,CAV1,TRIO,PLAUR,SFN,TP53BP2,ATF3,NET1,VCP,AKAP13,OSGIN1,CTGF,PEA15,MCL1,BCL10,GADD45A,JUN,ANKRD1,ZC3H12A,MTCH1,…
GO:0034097	response to cytokine	148	1035	0.2	1.43e-05	9606.ENSP00000064780,9606.ENSP00000171111,9606.ENSP00000212015,9606.ENSP00000216037,9606.ENSP00000216117,9606.ENSP00000216797,9606.ENSP00000220751,9606.ENSP00000221452,9606.ENSP00000226574,9606.ENSP00000227752,9606.ENSP00000228606,9606.ENSP00000229416,9606.ENSP00000239938,9606.ENSP00000244869,9606.ENSP00000245414,9606.ENSP00000245817,9606.ENSP00000249075,9606.ENSP00000252818,9606.ENSP00000252891,…	RELT,KEAP1,SIRT1,XBP1,HMOX1,NFKBIA,RIPK2,RELB,NFKB1,IL10RA,CYP27B1,GCLC,EGR1,EREG,IRF1,TNFSF9,LIF,JUND,NUMBL,RARA,IRAK2,OASL,TRAFD1,RIPK1,THBS1,RORA,MAP3K8,IL1A,BIRC3,MAP4K3,CBL,ICAM1,LEF1,SRF,TNFRSF10B,IFNGR2,STAT5B,REL,PCOLCE2,CXCL3,CXCL5,NFIL3,HSP90B1,CRK,IL12A,JUNB,LRP8,CEBPB,B3GNT2,FOS,CXCL8,ISG20,PDE12,CLCF1,ADAM17,FOSL1,TNFRSF10D,TOLLIP,STX4,MMP1,HSPA5,KARS,TNFRSF12A,CSF1,P4HB,IFNLR1,SOCS3…
GO:0051603	proteolysis involved in cellular protein catabolic process	89	532	0.27	1.46e-05	9606.ENSP00000158771,9606.ENSP00000171111,9606.ENSP00000185150,9606.ENSP00000212015,9606.ENSP00000216037,9606.ENSP00000217402,9606.ENSP00000219313,9606.ENSP00000221566,9606.ENSP00000237455,9606.ENSP00000242719,9606.ENSP00000246672,9606.ENSP00000247977,9606.ENSP00000248958,9606.ENSP00000249356,9606.ENSP00000256257,9606.ENSP00000256497,9606.ENSP00000259335,9606.ENSP00000260187,9606.ENSP00000261712,…	DERL2,KEAP1,ERLEC1,SIRT1,XBP1,CHMP4B,PSMD7,SGTA,RNF103,RNF11,NR1D1,FBXL12,SDF2L1,DNAJB9,RNF122,EDEM1,KIAA0368,USP2,PSMD11,FAF2,UFD1L,CBL,PSMD3,GET4,BTBD11,FBXW7,USP12,UBAP1,HSP90B1,KCTD5,RNF139,RNF181,FBXO45,KCTD2,KLHL11,TOLLIP,USP9X,RBBP6,VPS37A,RNF168,RCHY1,SIAH2,HSPA5,PMAIP1,YOD1,NPLOC4,KLHL25,DNAJB2,KCTD21,RNF41,KCTD6,UBE2H,MYLIP,TRIM38,VCP,ZRANB1,TOPORS,SMURF1,BTRC,TP53INP2,UBR4,SYVN1,SQSTM1…
GO:0032446	protein modification by small protein conjugation	108	690	0.24	1.52e-05	9606.ENSP00000171111,9606.ENSP00000212015,9606.ENSP00000232766,9606.ENSP00000237281,9606.ENSP00000237455,9606.ENSP00000242480,9606.ENSP00000242719,9606.ENSP00000247977,9606.ENSP00000255764,9606.ENSP00000256257,9606.ENSP00000257749,9606.ENSP00000260247,9606.ENSP00000262294,9606.ENSP00000263464,9606.ENSP00000264033,9606.ENSP00000264198,9606.ENSP00000264607,9606.ENSP00000268042,9606.ENSP00000269856,…	KEAP1,SIRT1,KLHL18,FBXO30,RNF103,EGR2,RNF11,FBXL12,MED10,RNF122,BACH2,DCUN1D5,TRIM37,BIRC3,CBL,MUL1,ASB1,ARRDC4,FEM1A,FEM1C,ASB6,FBXW7,TRIM36,TRIM11,SH3RF1,NSMCE2,MED8,MED27,RNF25,SENP2,FBXO33,UNKL,RNF139,RNF181,FBXO45,RBBP6,MALT1,DCUN1D3,RNF168,RCHY1,RNF10,SIAH2,UBE2O,RNF166,SPSB1,SOCS3,KLHL25,KCTD21,RNF41,WAC,KCTD6,UBE2H,MYLIP,TRIM38,VCP,PELI1,TOPORS,SMURF1,CTR9,BTRC,BCL10,TNKS2,LONRF3,TMEM189,…
GO:0010629	negative regulation of gene expression	217	1670	0.16	1.76e-05	9606.ENSP00000157600,9606.ENSP00000164227,9606.ENSP00000212015,9606.ENSP00000216037,9606.ENSP00000220592,9606.ENSP00000221452,9606.ENSP00000222329,9606.ENSP00000223095,9606.ENSP00000225688,9606.ENSP00000226574,9606.ENSP00000229416,9606.ENSP00000230321,9606.ENSP00000234198,9606.ENSP00000235382,9606.ENSP00000239938,9606.ENSP00000242057,9606.ENSP00000244050,9606.ENSP00000244869,9606.ENSP00000245414,…	LMCD1,BCL3,SIRT1,XBP1,AGO2,RELB,ERF,SERPINE1,RASD1,NFKB1,GCLC,MDFI,DLX2,RGS2,EGR1,AHR,SNAI1,EREG,IRF1,FOSB,NR1D1,DLL4,FXR2,JUND,SESN2,RARA,THAP1,DNAJB1,RRP8,H3F3B,EIF2S1,MBD2,BHLHE40,TBX3,BACH2,AKIRIN2,USP2,THBS1,TRIM37,CCNE1,ACIN1,EPC1,BIRC3,MXD1,LEF1,SRF,CREM,BTAF1,JDP2,PELO,CCRN4L,NIPBL,TRIM11,FLCN,BTG2,FGF19,ZNF281,REL,MITF,SNIP1,NFIL3,TSC1,RUNX1,JUNB,LRP8,RNF139,CEBPB,PPM1D,EIF2AK3,ZBTB5,ZNF…
GO:0002237	response to molecule of bacterial origin	61	317	0.33	2.1e-05	9606.ENSP00000064780,9606.ENSP00000216037,9606.ENSP00000216629,9606.ENSP00000216797,9606.ENSP00000220751,9606.ENSP00000223095,9606.ENSP00000226574,9606.ENSP00000227752,9606.ENSP00000228606,9606.ENSP00000246672,9606.ENSP00000248244,9606.ENSP00000252818,9606.ENSP00000254066,9606.ENSP00000256458,9606.ENSP00000257787,9606.ENSP00000264832,9606.ENSP00000269701,9606.ENSP00000276431,9606.ENSP00000280614,…	RELT,XBP1,BDKRB1,NFKBIA,RIPK2,SERPINE1,NFKB1,IL10RA,CYP27B1,NR1D1,TICAM1,JUND,RARA,IRAK2,AKIRIN2,ICAM1,AKAP8,TNFRSF10B,CCRN4L,CXCL3,CXCL5,IL12A,JUNB,CEBPB,PRKCE,FOS,CXCL8,ADAM17,TNFRSF10D,PPARD,TRIB1,NFKBIB,MALT1,PDE4B,PELI1,SBNO2,CTR9,DUSP10,MAPKAPK2,NFKB2,CHUK,ABCC2,BCL10,JUN,ANKRD1,ZC3H12A,EDN1,CXCL1,PLAA,VIMP,RELA,TLR6,GCH1,CXCL2,TRAF6,ADM,ATP2A2,LITAF,ZFP36,TNFRSF9,TNFAIP3
GO:0016567	protein ubiquitination	102	645	0.24	2.1e-05	9606.ENSP00000171111,9606.ENSP00000212015,9606.ENSP00000232766,9606.ENSP00000237281,9606.ENSP00000237455,9606.ENSP00000242719,9606.ENSP00000247977,9606.ENSP00000255764,9606.ENSP00000256257,9606.ENSP00000257749,9606.ENSP00000262294,9606.ENSP00000263464,9606.ENSP00000264033,9606.ENSP00000264198,9606.ENSP00000264607,9606.ENSP00000268042,9606.ENSP00000269856,9606.ENSP00000274457,9606.ENSP00000277458,…	KEAP1,SIRT1,KLHL18,FBXO30,RNF103,RNF11,FBXL12,MED10,RNF122,BACH2,TRIM37,BIRC3,CBL,MUL1,ASB1,ARRDC4,FEM1A,FEM1C,ASB6,FBXW7,TRIM36,TRIM11,SH3RF1,MED8,MED27,RNF25,FBXO33,UNKL,RNF139,RNF181,FBXO45,RBBP6,MALT1,RNF168,RCHY1,RNF10,SIAH2,UBE2O,RNF166,SPSB1,SOCS3,KLHL25,KCTD21,RNF41,WAC,KCTD6,UBE2H,MYLIP,TRIM38,VCP,PELI1,TOPORS,SMURF1,CTR9,BTRC,BCL10,TNKS2,LONRF3,TMEM189,RNF19B,UBR4,TRIM39,SYVN1,KLHL21,TR…
GO:0051240	positive regulation of multicellular organismal process	203	1551	0.16	2.76e-05	9606.ENSP00000164133,9606.ENSP00000164227,9606.ENSP00000198767,9606.ENSP00000212015,9606.ENSP00000216037,9606.ENSP00000216117,9606.ENSP00000220592,9606.ENSP00000220751,9606.ENSP00000223095,9606.ENSP00000224140,9606.ENSP00000226574,9606.ENSP00000228606,9606.ENSP00000230990,9606.ENSP00000232496,9606.ENSP00000234198,9606.ENSP00000234420,9606.ENSP00000235382,9606.ENSP00000239938,9606.ENSP00000240874,…	PPP2R5B,BCL3,RRN3,SIRT1,XBP1,HMOX1,AGO2,RIPK2,SERPINE1,SETX,NFKB1,CYP27B1,HBEGF,TUSC2,DLX2,MSH6,RGS2,EGR1,KALRN,SNAI1,EREG,IRF1,TNFSF9,C3,TICAM1,LIF,JUND,NUMBL,RARA,JAG1,BTG1,AKIRIN2,RIPK1,SDCBP,THBS1,LIPG,RORA,LHX5,MAPK6,SEMA7A,MMD,VAMP7,ACIN1,C19orf10,IL1A,ACVR1,SLC9A1,MUL1,RAPGEF2,ICAM1,LEF1,SRF,NRP1,GAL,CLSTN3,RHOB,PLK2,PAK1,FLT1,NIPBL,STAT5B,ITGA5,F2RL1,RUNX1,ANGPTL4,FADD,IL12A,LRP8,ADORA2B,…
GO:0006511	ubiquitin-dependent protein catabolic process	79	461	0.28	2.86e-05	9606.ENSP00000158771,9606.ENSP00000185150,9606.ENSP00000212015,9606.ENSP00000216037,9606.ENSP00000219313,9606.ENSP00000221566,9606.ENSP00000237455,9606.ENSP00000242719,9606.ENSP00000247977,9606.ENSP00000249356,9606.ENSP00000256257,9606.ENSP00000256497,9606.ENSP00000259335,9606.ENSP00000260187,9606.ENSP00000261712,9606.ENSP00000261942,9606.ENSP00000263202,9606.ENSP00000264033,9606.ENSP00000264639,…	DERL2,ERLEC1,SIRT1,XBP1,PSMD7,SGTA,RNF103,RNF11,FBXL12,DNAJB9,RNF122,EDEM1,KIAA0368,USP2,PSMD11,FAF2,UFD1L,CBL,PSMD3,BTBD11,FBXW7,USP12,UBAP1,HSP90B1,KCTD5,RNF139,RNF181,FBXO45,KCTD2,KLHL11,TOLLIP,USP9X,RBBP6,VPS37A,RNF168,RCHY1,SIAH2,HSPA5,YOD1,NPLOC4,KLHL25,DNAJB2,KCTD21,KCTD6,UBE2H,MYLIP,TRIM38,VCP,ZRANB1,TOPORS,SMURF1,BTRC,TP53INP2,UBR4,SYVN1,SQSTM1,USP8,NFE2L2,PLAA,VIMP,USP25,NEDD4L,UBE2J2,A…
GO:0032496	response to lipopolysaccharide	58	298	0.33	2.86e-05	9606.ENSP00000064780,9606.ENSP00000216037,9606.ENSP00000216629,9606.ENSP00000216797,9606.ENSP00000220751,9606.ENSP00000223095,9606.ENSP00000226574,9606.ENSP00000227752,9606.ENSP00000228606,9606.ENSP00000246672,9606.ENSP00000248244,9606.ENSP00000252818,9606.ENSP00000254066,9606.ENSP00000256458,9606.ENSP00000257787,9606.ENSP00000264832,9606.ENSP00000269701,9606.ENSP00000276431,9606.ENSP00000280614,…	RELT,XBP1,BDKRB1,NFKBIA,RIPK2,SERPINE1,NFKB1,IL10RA,CYP27B1,NR1D1,TICAM1,JUND,RARA,IRAK2,AKIRIN2,ICAM1,AKAP8,TNFRSF10B,CCRN4L,CXCL3,CXCL5,IL12A,JUNB,CEBPB,PRKCE,FOS,CXCL8,ADAM17,TNFRSF10D,PPARD,TRIB1,NFKBIB,PDE4B,PELI1,SBNO2,CTR9,DUSP10,MAPKAPK2,NFKB2,CHUK,ABCC2,JUN,ANKRD1,ZC3H12A,EDN1,CXCL1,PLAA,VIMP,RELA,GCH1,CXCL2,TRAF6,ADM,ATP2A2,LITAF,ZFP36,TNFRSF9,TNFAIP3
GO:0001933	negative regulation of protein phosphorylation	74	422	0.29	3.01e-05	9606.ENSP00000014914,9606.ENSP00000212015,9606.ENSP00000215631,9606.ENSP00000216037,9606.ENSP00000216629,9606.ENSP00000235382,9606.ENSP00000239223,9606.ENSP00000240100,9606.ENSP00000249075,9606.ENSP00000252992,9606.ENSP00000264033,9606.ENSP00000276925,9606.ENSP00000283228,9606.ENSP00000284273,9606.ENSP00000285071,9606.ENSP00000287878,9606.ENSP00000288943,9606.ENSP00000296677,9606.ENSP00000298573,…	GPRC5A,SIRT1,GADD45B,XBP1,BDKRB1,RGS2,DUSP1,DUSP4,LIF,CEP85,CBL,CDKN2B,PTPRR,UBASH3B,FLCN,PRKAG2,DUSP2,F2RL1,DUSP16,TERF2IP,IBTK,YWHAG,DDIT4,TRIB1,PER1,PIBF1,HSPH1,SOCS3,CAV1,SFN,ATF3,PMEPA1,KIRREL,ADARB1,ENPP1,MTOR,DUSP10,PPP1R15B,EFNA1,EIF3A,DUSP5,GADD45A,JUN,PPAP2B,PTPN1,RAPGEF1,ZC3H12A,DKK1,BAK1,KLF4,PARD3,SPRY2,ERRFI1,FLRT3,XDH,GPS2,IGFBP3,LATS2,SH3BP5,MYADM,AKT1S1,ASH1L,DUSP8,CDKN1A,PPP2CA,…
GO:0010498	proteasomal protein catabolic process	56	284	0.34	3.06e-05	9606.ENSP00000158771,9606.ENSP00000171111,9606.ENSP00000185150,9606.ENSP00000212015,9606.ENSP00000219313,9606.ENSP00000221566,9606.ENSP00000237455,9606.ENSP00000242719,9606.ENSP00000246672,9606.ENSP00000248958,9606.ENSP00000249356,9606.ENSP00000256257,9606.ENSP00000256497,9606.ENSP00000259335,9606.ENSP00000261942,9606.ENSP00000263202,9606.ENSP00000265857,9606.ENSP00000280758,9606.ENSP00000281708,…	DERL2,KEAP1,ERLEC1,SIRT1,PSMD7,SGTA,RNF103,RNF11,NR1D1,SDF2L1,DNAJB9,RNF122,EDEM1,KIAA0368,FAF2,UFD1L,GET4,BTBD11,FBXW7,HSP90B1,KCTD5,RNF139,RNF181,FBXO45,KCTD2,KLHL11,HSPA5,PMAIP1,YOD1,NPLOC4,DNAJB2,RNF41,UBE2H,TRIM38,VCP,TOPORS,SMURF1,BTRC,SYVN1,NFE2L2,PLAA,HM13,VIMP,NEDD4L,UBE2J2,PSME4,ARNTL,HERPUD1,ABTB2,RNF4,UBC,DDIT3,UBE2J1,RNF111,BIRC2,ITCH
GO:0009628	response to abiotic stimulus	148	1052	0.19	3.11e-05	9606.ENSP00000164227,9606.ENSP00000179259,9606.ENSP00000212015,9606.ENSP00000216117,9606.ENSP00000216267,9606.ENSP00000216629,9606.ENSP00000216797,9606.ENSP00000221452,9606.ENSP00000226574,9606.ENSP00000229416,9606.ENSP00000230361,9606.ENSP00000234420,9606.ENSP00000239223,9606.ENSP00000239938,9606.ENSP00000240874,9606.ENSP00000245414,9606.ENSP00000245919,9606.ENSP00000250457,9606.ENSP00000251849,…	BCL3,C12orf5,SIRT1,HMOX1,BRD1,BDKRB1,NFKBIA,RELB,NFKB1,GCLC,GUCA1B,MSH6,DUSP1,EGR1,KALRN,IRF1,FOSB,EGLN3,RAF1,MICB,JUND,EIF2S1,MBD2,BHLHE40,RAB11FIP5,USP2,THBS1,CCND2,RORA,N4BP1,IL1A,MAP4K3,SLC9A1,CBL,ICAM1,SRF,EIF2B2,SIK1,RHOB,TNFRSF10B,PAK1,FBXW7,NIPBL,BTG2,TMEM199,AQP3,TSC1,HSP90B1,TRPV3,ANGPTL4,FADD,IL12A,JUNB,CDC25A,PRKCE,FOS,PPM1D,EIF2AK3,TBL2,DDIT4,ADAM17,FOSL1,B4GALT2,PPARD,CFLAR,DNAJA2,P…
GO:0016311	dephosphorylation	56	285	0.34	3.33e-05	9606.ENSP00000179259,9606.ENSP00000200453,9606.ENSP00000215904,9606.ENSP00000221086,9606.ENSP00000239223,9606.ENSP00000240100,9606.ENSP00000254654,9606.ENSP00000261596,9606.ENSP00000264380,9606.ENSP00000279387,9606.ENSP00000282412,9606.ENSP00000283228,9606.ENSP00000284273,9606.ENSP00000285381,9606.ENSP00000288943,9606.ENSP00000298573,9606.ENSP00000303706,9606.ENSP00000306682,9606.ENSP00000307786,…	C12orf5,PPP1R15A,PDXP,MTMR9,DUSP1,DUSP4,ILKAP,LPIN2,PIKFYVE,PPP4C,PPM1B,PTPRR,UBASH3B,CA3,DUSP2,DUSP16,CDC25A,PPM1D,CYCS,PPP1R3B,SSH1,PPP2R2A,NT5C2,PTP4A2,PPTC7,CDC14A,DUSP10,PPP1R15B,DUSP12,INPP5A,DUSP5,BTRC,DNAJC6,PPAP2B,PTPN1,EYA3,PTPRH,INPP1,NT5DC3,PDP1,DUSP8,PPP3CC,TMEM55B,TPTE2,PPP4R1,MTMR3,PPAPDC1B,LPIN1,SYNJ1,PPP2CA,DAPP1,PFKFB3,PTPN21,PHLPP2,LPPR2,RPAP2
GO:0051272	positive regulation of cellular component movement	81	482	0.27	3.96e-05	9606.ENSP00000212015,9606.ENSP00000216037,9606.ENSP00000216117,9606.ENSP00000216629,9606.ENSP00000220592,9606.ENSP00000223095,9606.ENSP00000230990,9606.ENSP00000244050,9606.ENSP00000260130,9606.ENSP00000260356,9606.ENSP00000262498,9606.ENSP00000263339,9606.ENSP00000263640,9606.ENSP00000264036,9606.ENSP00000264431,9606.ENSP00000264832,9606.ENSP00000265165,9606.ENSP00000265371,9606.ENSP00000272233,…	SIRT1,XBP1,HMOX1,BDKRB1,AGO2,SERPINE1,HBEGF,SNAI1,SDCBP,THBS1,CFAP20,IL1A,ACVR1,MCAM,RAPGEF2,ICAM1,LEF1,NRP1,RHOB,PLK2,PAK1,FLT1,NIPBL,ITGA5,CXCL3,CXCL5,F2RL1,CRK,FADD,IL12A,PRKCE,CXCL8,ADAM17,DAB2,SPHK1,SWAP70,SSH1,ZNF609,STX4,CALR,HSPA5,KARS,CSF1,PDGFB,SMAD3,CREB3,MAP2K3,PDGFA,PTRF,P2RX4,MAP2,MTOR,NOS1AP,PROX1,DDR2,IL6R,NUS1,JUN,PPAP2B,PLAU,ZC3H12A,IRS2,SPRY2,BMP2,EDN1,GCNT2,CD274,GPNMB,MYADM,E…
GO:0043632	modification-dependent macromolecule catabolic process	80	476	0.27	4.55e-05	9606.ENSP00000158771,9606.ENSP00000185150,9606.ENSP00000212015,9606.ENSP00000216037,9606.ENSP00000219313,9606.ENSP00000221566,9606.ENSP00000237455,9606.ENSP00000242719,9606.ENSP00000247977,9606.ENSP00000249356,9606.ENSP00000256257,9606.ENSP00000256497,9606.ENSP00000259335,9606.ENSP00000260187,9606.ENSP00000261712,9606.ENSP00000261942,9606.ENSP00000263202,9606.ENSP00000264033,9606.ENSP00000264639,…	DERL2,ERLEC1,SIRT1,XBP1,PSMD7,SGTA,RNF103,RNF11,FBXL12,DNAJB9,RNF122,EDEM1,KIAA0368,USP2,PSMD11,FAF2,UFD1L,CBL,PSMD3,BTBD11,FBXW7,USP12,UBAP1,HSP90B1,KCTD5,RNF139,RNF181,FBXO45,KCTD2,KLHL11,TOLLIP,USP9X,RBBP6,VPS37A,RNF168,RCHY1,SIAH2,HSPA5,YOD1,NPLOC4,KLHL25,DNAJB2,KCTD21,KCTD6,UBE2H,MYLIP,TRIM38,VCP,ZRANB1,TOPORS,SMURF1,BTRC,TP53INP2,UBR4,SYVN1,SQSTM1,USP8,NFE2L2,PLAA,VIMP,USP25,NEDD4L,UBE2J2,A…
GO:0043122	regulation of I-kappaB kinase/NF-kappaB signaling	39	167	0.41	4.58e-05	9606.ENSP00000212015,9606.ENSP00000220751,9606.ENSP00000248244,9606.ENSP00000259808,9606.ENSP00000261523,9606.ENSP00000263377,9606.ENSP00000263464,9606.ENSP00000276431,9606.ENSP00000282412,9606.ENSP00000295025,9606.ENSP00000296677,9606.ENSP00000300086,9606.ENSP00000301838,9606.ENSP00000306124,9606.ENSP00000312455,9606.ENSP00000314420,9606.ENSP00000321026,9606.ENSP00000341874,9606.ENSP00000349596,…	SIRT1,RIPK2,TICAM1,RIPK1,RORA,BRD4,BIRC3,TNFRSF10B,PPM1B,REL,F2RL1,TERF2IP,FADD,PRKCE,CFLAR,PER1,LURAP1L,RIOK3,TRIM38,ANKRD17,PELI1,AKAP13,BTRC,CHUK,BCL10,ZC3H12A,PIM2,OPTN,TRIM5,SQSTM1,ASH1L,RELA,TLR6,TRAF6,OTUD7B,BIRC2,TNFAIP3,MAP3K14,IKBKG
GO:0036498	IRE1-mediated unfolded protein response	20	52	0.63	4.89e-05	9606.ENSP00000164133,9606.ENSP00000216037,9606.ENSP00000222803,9606.ENSP00000249356,9606.ENSP00000256497,9606.ENSP00000260643,9606.ENSP00000262139,9606.ENSP00000262947,9606.ENSP00000314615,9606.ENSP00000323313,9606.ENSP00000324173,9606.ENSP00000328023,9606.ENSP00000360683,9606.ENSP00000364591,9606.ENSP00000366395,9606.ENSP00000378721,9606.ENSP00000386918,9606.ENSP00000401303,9606.ENSP00000418401,…	PPP2R5B,XBP1,FKBP14,DNAJB9,EDEM1,PREB,WIPI1,C19orf10,ARFGAP1,PDIA5,HSPA5,SRPR,PTPN1,TSPYL2,SYVN1,SEC31A,KDELR3,SHC1,SRPRB,DNAJC3
GO:0002682	regulation of immune system process	184	1391	0.16	5.01e-05	9606.ENSP00000166139,9606.ENSP00000212015,9606.ENSP00000216037,9606.ENSP00000216117,9606.ENSP00000216629,9606.ENSP00000216797,9606.ENSP00000220751,9606.ENSP00000221452,9606.ENSP00000223095,9606.ENSP00000226574,9606.ENSP00000229332,9606.ENSP00000234420,9606.ENSP00000239882,9606.ENSP00000242057,9606.ENSP00000244869,9606.ENSP00000245414,9606.ENSP00000245817,9606.ENSP00000245907,9606.ENSP00000246672,…	FSTL3,SIRT1,XBP1,HMOX1,BDKRB1,NFKBIA,RIPK2,RELB,SERPINE1,NFKB1,CLEC4A,MSH6,ELF1,AHR,EREG,IRF1,TNFSF9,C3,NR1D1,TICAM1,LIF,RAF1,MICB,RARA,H3F3B,JAG1,IRAK2,TRAFD1,RIPK1,THBS1,RORA,SEMA7A,PIK3C3,NLRC5,VAMP7,ACIN1,MAP3K8,UFD1L,IL1A,BIRC3,MUL1,ICAM1,LEF1,GAL,EIF2B2,PAK1,FBXW7,PPM1B,UBASH3B,OTULIN,SH3RF1,FLCN,IFNGR2,STAT5B,MITF,CXCL3,CXCL5,F2RL1,AQP3,HSP90B1,RUNX1,CRK,FADD,IL12A,ADORA2B,CEBPB,PRKCE,FOS,…
GO:0031331	positive regulation of cellular catabolic process	63	343	0.31	5.01e-05	9606.ENSP00000171111,9606.ENSP00000212015,9606.ENSP00000216037,9606.ENSP00000216117,9606.ENSP00000220592,9606.ENSP00000220751,9606.ENSP00000221566,9606.ENSP00000229416,9606.ENSP00000248244,9606.ENSP00000253063,9606.ENSP00000256497,9606.ENSP00000264198,9606.ENSP00000274289,9606.ENSP00000281708,9606.ENSP00000285071,9606.ENSP00000287437,9606.ENSP00000290551,9606.ENSP00000298552,9606.ENSP00000304051,…	KEAP1,SIRT1,XBP1,HMOX1,AGO2,RIPK2,SGTA,GCLC,TICAM1,SESN2,EDEM1,MUL1,PLK2,FBXW7,FLCN,NSMCE2,BTG2,TSC1,RNF139,TRIB1,DAB2,ZFAND2A,CLU,RCHY1,RNF166,RAB12,HSP90AA1,DNAJB2,CAV1,NRD1,WAC,UVRAG,VCP,SUPV3L1,SMURF1,PTPN1,LONRF3,PLK3,ZC3H12A,RNF19B,TP53INP2,IRS2,PIM2,PIP4K2A,OPTN,CSNK1E,NFE2L2,LONRF1,RDX,SH3BP4,GIGYF2,ABHD5,NANOS1,PNPT1,HERPUD1,TOB1,PFKFB3,LDLR,ZFP36,ITCH,TNFAIP3,C9orf72,IKBKG
GO:0044265	cellular macromolecule catabolic process	123	842	0.21	5.18e-05	9606.ENSP00000158771,9606.ENSP00000171111,9606.ENSP00000185150,9606.ENSP00000212015,9606.ENSP00000216037,9606.ENSP00000217402,9606.ENSP00000219313,9606.ENSP00000221566,9606.ENSP00000237455,9606.ENSP00000242719,9606.ENSP00000246672,9606.ENSP00000247977,9606.ENSP00000248958,9606.ENSP00000249356,9606.ENSP00000256257,9606.ENSP00000256497,9606.ENSP00000259335,9606.ENSP00000259808,9606.ENSP00000260187,…	DERL2,KEAP1,ERLEC1,SIRT1,XBP1,CHMP4B,PSMD7,SGTA,RNF103,RNF11,NR1D1,FBXL12,SDF2L1,DNAJB9,RNF122,EDEM1,KIAA0368,RIPK1,USP2,PSMD11,FAF2,UFD1L,CBL,PSMD3,GET4,PELO,CCRN4L,BTBD11,FBXW7,USP12,TMEM199,UBAP1,HSP90B1,KCTD5,RNF139,ISG20,RNF181,PDE12,FBXO45,KCTD2,RNASEH1,KLHL11,ZHX2,TOLLIP,USP9X,SAMD4B,RBBP6,VPS37A,EDC3,RNF168,RCHY1,SIAH2,HSPA5,PPP2R2A,PMAIP1,YOD1,NPLOC4,RAB12,DHX34,KLHL25,PNRC1,DNAJB2,KCTD2…
GO:0009896	positive regulation of catabolic process	70	399	0.29	5.53e-05	9606.ENSP00000171111,9606.ENSP00000212015,9606.ENSP00000216037,9606.ENSP00000216117,9606.ENSP00000220592,9606.ENSP00000220751,9606.ENSP00000221566,9606.ENSP00000229416,9606.ENSP00000248244,9606.ENSP00000253063,9606.ENSP00000256497,9606.ENSP00000264198,9606.ENSP00000274289,9606.ENSP00000281708,9606.ENSP00000285071,9606.ENSP00000287437,9606.ENSP00000290551,9606.ENSP00000294179,9606.ENSP00000298552,…	KEAP1,SIRT1,XBP1,HMOX1,AGO2,RIPK2,SGTA,GCLC,TICAM1,SESN2,EDEM1,MUL1,PLK2,FBXW7,FLCN,NSMCE2,BTG2,STX5,TSC1,RNF139,PRKCE,TRIB1,DAB2,ZFAND2A,CLU,RCHY1,RNF166,RAB12,HSP90AA1,DNAJB2,CAV1,RNF41,NRD1,WAC,UVRAG,MYLIP,VCP,SUPV3L1,SMURF1,PTPN1,LONRF3,PLK3,ZC3H12A,RNF19B,TP53INP2,IRS2,PIM2,PIP4K2A,OPTN,CSNK1E,NFE2L2,LONRF1,NEDD4L,RDX,SH3BP4,GIGYF2,ABHD5,NANOS1,PNPT1,HERPUD1,TIPARP,TOB1,PFKFB3,LDLR,ZFP36,OAZ…
GO:0051239	regulation of multicellular organismal process	329	2788	0.11	5.81e-05	9606.ENSP00000157600,9606.ENSP00000164024,9606.ENSP00000164133,9606.ENSP00000164227,9606.ENSP00000166139,9606.ENSP00000171111,9606.ENSP00000198767,9606.ENSP00000212015,9606.ENSP00000216037,9606.ENSP00000216117,9606.ENSP00000216797,9606.ENSP00000220592,9606.ENSP00000220751,9606.ENSP00000221452,9606.ENSP00000223095,9606.ENSP00000224140,9606.ENSP00000226574,9606.ENSP00000228606,9606.ENSP00000229332,…	LMCD1,CELSR3,PPP2R5B,BCL3,FSTL3,KEAP1,RRN3,SIRT1,XBP1,HMOX1,NFKBIA,AGO2,RIPK2,RELB,SERPINE1,SETX,NFKB1,CYP27B1,CLEC4A,HBEGF,TUSC2,DLX2,MSH6,RGS2,CAMSAP2,ELF1,EGR1,KALRN,EGR2,SNAI1,EREG,IRF1,TNFSF9,C3,WNK4,TICAM1,LIF,DLL4,GDF15,JUND,NUMBL,RARA,H3F3B,JAG1,BTG1,TBX3,AKIRIN2,RAB11FIP5,RIPK1,SDCBP,THBS1,LIPG,RORA,LHX5,MAPK6,SEMA7A,MMD,NLRC5,VAMP7,ACIN1,C19orf10,UFD1L,IL1A,KCNK6,BIRC3,ACVR1,SLC9A1,LCAT…
GO:1903362	regulation of cellular protein catabolic process	50	248	0.35	6.4e-05	9606.ENSP00000158771,9606.ENSP00000171111,9606.ENSP00000185150,9606.ENSP00000216037,9606.ENSP00000221566,9606.ENSP00000229416,9606.ENSP00000256497,9606.ENSP00000260130,9606.ENSP00000262384,9606.ENSP00000274289,9606.ENSP00000281708,9606.ENSP00000287437,9606.ENSP00000304051,9606.ENSP00000312150,9606.ENSP00000313391,9606.ENSP00000314619,9606.ENSP00000315130,9606.ENSP00000316512,9606.ENSP00000321239,…	DERL2,KEAP1,ERLEC1,XBP1,SGTA,GCLC,EDEM1,SDCBP,N4BP1,PLK2,FBXW7,NSMCE2,RNF139,TRIB1,DAB2,ZFAND2A,CLU,TLK2,RCHY1,RNF166,YOD1,HSP90AA1,DNAJB2,CAV1,WAC,MYLIP,VCP,DDA1,SMURF1,EFNA1,BTRC,LONRF3,PLK3,RNF19B,TRIM39,TAF9,CSNK1E,NFE2L2,LONRF1,TMF1,USP25,RDX,HIPK2,HERPUD1,RIC1,RYBP,SH3RF2,UBE2J1,LDLR,TNFAIP3
GO:0006984	ER-nucleus signaling pathway	16	34	0.71	7.08e-05	9606.ENSP00000216037,9606.ENSP00000245787,9606.ENSP00000256383,9606.ENSP00000299767,9606.ENSP00000306512,9606.ENSP00000307235,9606.ENSP00000320866,9606.ENSP00000324173,9606.ENSP00000344352,9606.ENSP00000344741,9606.ENSP00000356156,9606.ENSP00000380252,9606.ENSP00000381282,9606.ENSP00000409555,9606.ENSP00000440045,9606.ENSP00000448665	XBP1,INSIG2,EIF2S1,HSP90B1,CXCL8,EIF2AK3,CALR,HSPA5,ATF3,INSIG1,PPP1R15B,NFE2L2,VIMP,HERPUD1,ATP2A2,DDIT3
GO:1903320	regulation of protein modification by small protein conjugation or removal	46	220	0.36	7.08e-05	9606.ENSP00000220751,9606.ENSP00000229416,9606.ENSP00000239938,9606.ENSP00000248244,9606.ENSP00000260247,9606.ENSP00000262384,9606.ENSP00000263464,9606.ENSP00000264198,9606.ENSP00000265138,9606.ENSP00000268042,9606.ENSP00000269856,9606.ENSP00000281708,9606.ENSP00000296257,9606.ENSP00000304051,9606.ENSP00000306124,9606.ENSP00000313681,9606.ENSP00000314733,9606.ENSP00000318966,9606.ENSP00000319279,…	RIPK2,GCLC,EGR1,TICAM1,DCUN1D5,N4BP1,BIRC3,MUL1,ARRDC3,ARRDC4,FEM1A,FBXW7,SENP2,RNF139,PRKCE,SPHK1,TOLLIP,PINX1,MALT1,DCUN1D3,RCHY1,SIAH2,HSPA5,HSP90AA1,DNAJB2,CAV1,RASSF1,VCP,PELI1,TOPORS,MTOR,CTR9,BCL10,ZC3H12A,HSPA1B,GPS2,PLAA,RELA,HERPUD1,DCUN1D2,UBR5,TRAF6,RNF111,BIRC2,ITCH,TNFAIP3
GO:0030334	regulation of cell migration	112	753	0.21	7.21e-05	9606.ENSP00000212015,9606.ENSP00000216037,9606.ENSP00000216117,9606.ENSP00000216629,9606.ENSP00000220592,9606.ENSP00000223095,9606.ENSP00000230990,9606.ENSP00000244050,9606.ENSP00000249749,9606.ENSP00000254958,9606.ENSP00000260130,9606.ENSP00000260356,9606.ENSP00000263339,9606.ENSP00000263640,9606.ENSP00000264036,9606.ENSP00000264431,9606.ENSP00000264832,9606.ENSP00000265165,9606.ENSP00000265354,…	SIRT1,XBP1,HMOX1,BDKRB1,AGO2,SERPINE1,HBEGF,SNAI1,DLL4,JAG1,SDCBP,THBS1,IL1A,ACVR1,MCAM,RAPGEF2,ICAM1,LEF1,SRF,NRP1,RHOB,PLK2,DLC1,PAK1,FLT1,NIPBL,PTPRR,FLCN,ITGA5,CXCL3,CXCL5,F2RL1,CRK,FADD,IL12A,PRKCE,CXCL8,ADAM17,PPARD,TRIB1,DAB2,SPHK1,SWAP70,SSH1,ZNF609,STX4,RAP2B,CALR,HSPA5,LAMA3,KARS,CSF1,PDGFB,SMAD3,ARID2,STARD13,CREB3,RNF41,MAP2K3,PDGFA,EPHA2,P2RX4,ADARB1,MTOR,LRIG2,DUSP10,PROX1,SGK1,DDR2…
GO:0045860	positive regulation of protein kinase activity	84	517	0.25	7.6e-05	9606.ENSP00000013125,9606.ENSP00000056217,9606.ENSP00000209728,9606.ENSP00000212015,9606.ENSP00000215631,9606.ENSP00000220751,9606.ENSP00000239938,9606.ENSP00000244869,9606.ENSP00000251849,9606.ENSP00000252809,9606.ENSP00000256458,9606.ENSP00000259808,9606.ENSP00000260356,9606.ENSP00000261254,9606.ENSP00000262065,9606.ENSP00000262395,9606.ENSP00000263056,9606.ENSP00000263881,9606.ENSP00000264157,…	MAP4K5,ARHGEF5,CDC6,SIRT1,GADD45B,RIPK2,EGR1,EREG,RAF1,GDF15,IRAK2,RIPK1,THBS1,CCND2,MMD,TRAF4,MAP3K8,MAP4K3,CCNT2,MUL1,ALS2,RAPGEF2,MAP3K13,MAPKAP1,TNFRSF10B,PAK1,FBXW7,FLT1,PRKAG2,BRAF,TGFA,CCNL1,CRK,LRP8,ADORA2B,ADAM17,CLU,DVL3,PIBF1,HSPH1,MALT1,KARS,CSF1,PDGFB,HSP90AA1,SPDYA,MAP2K3,PDGFA,MTOR,AKAP13,PROX1,MAPKAPK2,DDR2,PEA15,EFNA1,IL6R,DUSP5,SLK,AVPI1,GADD45A,PTPN1,RAPGEF1,SDC4,PIM1,DKK1,SPRY…
GO:0030335	positive regulation of cell migration	76	452	0.27	7.75e-05	9606.ENSP00000212015,9606.ENSP00000216037,9606.ENSP00000216117,9606.ENSP00000216629,9606.ENSP00000220592,9606.ENSP00000223095,9606.ENSP00000230990,9606.ENSP00000244050,9606.ENSP00000260130,9606.ENSP00000260356,9606.ENSP00000263339,9606.ENSP00000263640,9606.ENSP00000264036,9606.ENSP00000264431,9606.ENSP00000264832,9606.ENSP00000265165,9606.ENSP00000265371,9606.ENSP00000272233,9606.ENSP00000274289,…	SIRT1,XBP1,HMOX1,BDKRB1,AGO2,SERPINE1,HBEGF,SNAI1,SDCBP,THBS1,IL1A,ACVR1,MCAM,RAPGEF2,ICAM1,LEF1,NRP1,RHOB,PLK2,PAK1,FLT1,NIPBL,ITGA5,CXCL3,CXCL5,F2RL1,CRK,FADD,IL12A,PRKCE,CXCL8,ADAM17,DAB2,SPHK1,SWAP70,SSH1,ZNF609,STX4,CALR,HSPA5,KARS,CSF1,PDGFB,SMAD3,CREB3,MAP2K3,PDGFA,P2RX4,MTOR,PROX1,DDR2,IL6R,NUS1,JUN,PPAP2B,PLAU,ZC3H12A,IRS2,SPRY2,BMP2,EDN1,GCNT2,CD274,GPNMB,MYADM,ETS1,CXCL1,NFE2L2,PLAA,RD…
GO:1903573	negative regulation of response to endoplasmic reticulum stress	18	44	0.65	7.76e-05	9606.ENSP00000158771,9606.ENSP00000185150,9606.ENSP00000200453,9606.ENSP00000216037,9606.ENSP00000221566,9606.ENSP00000249356,9606.ENSP00000315130,9606.ENSP00000324173,9606.ENSP00000326813,9606.ENSP00000342136,9606.ENSP00000356156,9606.ENSP00000360683,9606.ENSP00000366395,9606.ENSP00000381282,9606.ENSP00000383044,9606.ENSP00000409555,9606.ENSP00000451261,9606.ENSP00000473631	DERL2,ERLEC1,PPP1R15A,XBP1,SGTA,DNAJB9,CLU,HSPA5,YOD1,CREB3,PPP1R15B,PTPN1,SYVN1,VIMP,USP25,HERPUD1,UBE2J1,DNAJC3
GO:0032879	regulation of localization	301	2524	0.12	7.87e-05	9606.ENSP00000056217,9606.ENSP00000158771,9606.ENSP00000164024,9606.ENSP00000185150,9606.ENSP00000202556,9606.ENSP00000212015,9606.ENSP00000216037,9606.ENSP00000216117,9606.ENSP00000216629,9606.ENSP00000216797,9606.ENSP00000218176,9606.ENSP00000220325,9606.ENSP00000220509,9606.ENSP00000220592,9606.ENSP00000220751,9606.ENSP00000223095,9606.ENSP00000225174,9606.ENSP00000225235,9606.ENSP00000226574,…	ARHGEF5,DERL2,CELSR3,ERLEC1,PPP1R13B,SIRT1,XBP1,HMOX1,BDKRB1,NFKBIA,KCND1,EHD4,VPS18,AGO2,RIPK2,SERPINE1,PPIF,TBC1D12,NFKB1,HBEGF,RGS2,RHOQ,KALRN,SNAI1,EREG,C3,NR1D1,WNK4,LIF,DLL4,RAF1,SESN2,JAG1,EDEM1,RAB11FIP5,SLC31A2,RIPK1,SDCBP,THBS1,PREB,LIPG,PIK3C3,MMD,TSPAN13,CFAP20,VAMP7,CCNE1,IL1A,KCNK6,ACVR1,SLC9A1,CBL,MCAM,MUL1,RAPGEF2,DNAJC27,ICAM1,GOLPH3,LEF1,SRF,NRP1,GAL,EXPH5,CLSTN3,SIK1,RHOB,RAB5A…
GO:0042327	positive regulation of phosphorylation	138	984	0.19	7.87e-05	9606.ENSP00000013125,9606.ENSP00000056217,9606.ENSP00000179259,9606.ENSP00000209728,9606.ENSP00000212015,9606.ENSP00000215631,9606.ENSP00000216037,9606.ENSP00000220325,9606.ENSP00000220751,9606.ENSP00000230990,9606.ENSP00000239938,9606.ENSP00000244869,9606.ENSP00000245907,9606.ENSP00000249075,9606.ENSP00000251849,9606.ENSP00000252809,9606.ENSP00000256458,9606.ENSP00000259808,9606.ENSP00000260130,…	MAP4K5,ARHGEF5,C12orf5,CDC6,SIRT1,GADD45B,XBP1,EHD4,RIPK2,HBEGF,EGR1,EREG,C3,LIF,RAF1,GDF15,IRAK2,RIPK1,SDCBP,THBS1,CCND2,SEMA7A,MMD,TRAF4,C19orf10,MAP3K8,ACVR1,MAP4K3,CCNT2,MUL1,ALS2,RAPGEF2,DNAJC27,ICAM1,MAP3K13,NRP1,MAPKAP1,GAREM,TNFRSF10B,PAK1,FBXW7,FLT1,SH3RF1,FLCN,PRKAG2,BRAF,ITGA5,FGF19,TGFA,CCNL1,SENP2,F2RL1,TERF2IP,CRK,IL12A,LRP8,ADORA2B,PRKCE,CLCF1,ADAM17,ZNF622,CFLAR,DAB2,SPHK1,CLU,DVL…
GO:2000147	positive regulation of cell motility	78	469	0.26	8.01e-05	9606.ENSP00000212015,9606.ENSP00000216037,9606.ENSP00000216117,9606.ENSP00000216629,9606.ENSP00000220592,9606.ENSP00000223095,9606.ENSP00000230990,9606.ENSP00000244050,9606.ENSP00000260130,9606.ENSP00000260356,9606.ENSP00000262498,9606.ENSP00000263339,9606.ENSP00000263640,9606.ENSP00000264036,9606.ENSP00000264431,9606.ENSP00000264832,9606.ENSP00000265165,9606.ENSP00000265371,9606.ENSP00000272233,…	SIRT1,XBP1,HMOX1,BDKRB1,AGO2,SERPINE1,HBEGF,SNAI1,SDCBP,THBS1,CFAP20,IL1A,ACVR1,MCAM,RAPGEF2,ICAM1,LEF1,NRP1,RHOB,PLK2,PAK1,FLT1,NIPBL,ITGA5,CXCL3,CXCL5,F2RL1,CRK,FADD,IL12A,PRKCE,CXCL8,ADAM17,DAB2,SPHK1,SWAP70,SSH1,ZNF609,STX4,CALR,HSPA5,KARS,CSF1,PDGFB,SMAD3,CREB3,MAP2K3,PDGFA,PTRF,P2RX4,MTOR,PROX1,DDR2,IL6R,NUS1,JUN,PPAP2B,PLAU,ZC3H12A,IRS2,SPRY2,BMP2,EDN1,GCNT2,CD274,GPNMB,MYADM,ETS1,CXCL1,NF…
GO:0040008	regulation of growth	101	663	0.22	9.02e-05	9606.ENSP00000158771,9606.ENSP00000212015,9606.ENSP00000216037,9606.ENSP00000216629,9606.ENSP00000228606,9606.ENSP00000230990,9606.ENSP00000235382,9606.ENSP00000252809,9606.ENSP00000253063,9606.ENSP00000254810,9606.ENSP00000256015,9606.ENSP00000260130,9606.ENSP00000261918,9606.ENSP00000262198,9606.ENSP00000263062,9606.ENSP00000263847,9606.ENSP00000263980,9606.ENSP00000264198,9606.ENSP00000265165,…	DERL2,SIRT1,XBP1,BDKRB1,CYP27B1,HBEGF,RGS2,GDF15,SESN2,H3F3B,BTG1,SDCBP,SEMA7A,ADNP2,EPC1,OSBP,SLC9A1,MUL1,LEF1,FSTL4,SRF,NRP1,GAL,CLSTN3,EAF2,LRP12,PAK1,NIPBL,FLCN,STAT5B,CRK,SLC25A33,ADAM17,PPARD,SPHK1,DCUN1D3,SERTAD3,TNFRSF12A,CSF1,SOCS3,SMAD3,NDEL1,DNAJB2,KCTD21,SFN,JARID2,CREB3,NET1,KCTD6,GOLGA4,ADIPOR2,SUPV3L1,MAP2,ENPP1,MTOR,SMURF1,INO80,OSGIN1,DUSP10,PROX1,SGK1,CTGF,ADRB1,MRGBP,TNKS2,PIM1…
GO:0009057	macromolecule catabolic process	136	970	0.19	9.3e-05	9606.ENSP00000158771,9606.ENSP00000171111,9606.ENSP00000185150,9606.ENSP00000212015,9606.ENSP00000216037,9606.ENSP00000217402,9606.ENSP00000219313,9606.ENSP00000221566,9606.ENSP00000237455,9606.ENSP00000237642,9606.ENSP00000242719,9606.ENSP00000246672,9606.ENSP00000247977,9606.ENSP00000248958,9606.ENSP00000249356,9606.ENSP00000256257,9606.ENSP00000256497,9606.ENSP00000259335,9606.ENSP00000259808,…	DERL2,KEAP1,ERLEC1,SIRT1,XBP1,CHMP4B,PSMD7,SGTA,RNF103,STBD1,RNF11,NR1D1,FBXL12,SDF2L1,DNAJB9,RNF122,EDEM1,KIAA0368,RIPK1,USP2,PSMD11,FAF2,UFD1L,SLC9A1,CBL,PSMD3,GET4,PELO,CCRN4L,BTBD11,FBXW7,USP12,TMEM199,UBAP1,HSP90B1,KCTD5,RNF139,ISG20,RNF181,PDE12,FBXO45,KCTD2,RNASEH1,KLHL11,ZHX2,TOLLIP,CLU,USP9X,SAMD4B,RBBP6,VPS37A,EDC3,RNF168,RCHY1,SIAH2,HSPA5,PPP2R2A,PMAIP1,YOD1,CLN8,NPLOC4,RAB12,DHX34,HSP…
GO:0002684	positive regulation of immune system process	126	882	0.2	9.68e-05	9606.ENSP00000212015,9606.ENSP00000216037,9606.ENSP00000216117,9606.ENSP00000216629,9606.ENSP00000216797,9606.ENSP00000220751,9606.ENSP00000221452,9606.ENSP00000223095,9606.ENSP00000226574,9606.ENSP00000229332,9606.ENSP00000234420,9606.ENSP00000244869,9606.ENSP00000245817,9606.ENSP00000245907,9606.ENSP00000248244,9606.ENSP00000249075,9606.ENSP00000251849,9606.ENSP00000252229,9606.ENSP00000254066,…	SIRT1,XBP1,HMOX1,BDKRB1,NFKBIA,RIPK2,RELB,SERPINE1,NFKB1,CLEC4A,MSH6,EREG,TNFSF9,C3,TICAM1,LIF,RAF1,MICB,RARA,JAG1,IRAK2,RIPK1,THBS1,SEMA7A,PIK3C3,NLRC5,VAMP7,ACIN1,MAP3K8,IL1A,ICAM1,LEF1,EIF2B2,PAK1,OTULIN,STAT5B,CXCL3,CXCL5,F2RL1,AQP3,HSP90B1,RUNX1,CRK,FADD,IL12A,ADORA2B,PRKCE,FOS,CXCL8,CLCF1,ADAM17,TRIB1,CLU,SWAP70,STX4,EGR3,HSPH1,MALT1,CALR,WIPF2,ZNF335,KARS,NFKBIZ,CSF1,PDE4B,POLR3C,HSP90AA1,…
GO:0008219	cell death	148	1080	0.18	0.0001	9606.ENSP00000064780,9606.ENSP00000164227,9606.ENSP00000179259,9606.ENSP00000200453,9606.ENSP00000202556,9606.ENSP00000212015,9606.ENSP00000215631,9606.ENSP00000216037,9606.ENSP00000216117,9606.ENSP00000216797,9606.ENSP00000220751,9606.ENSP00000225174,9606.ENSP00000226574,9606.ENSP00000228515,9606.ENSP00000229416,9606.ENSP00000231668,9606.ENSP00000234420,9606.ENSP00000238788,9606.ENSP00000242057,…	RELT,BCL3,C12orf5,PPP1R15A,PPP1R13B,SIRT1,GADD45B,XBP1,HMOX1,NFKBIA,RIPK2,PPIF,NFKB1,CSRNP2,GCLC,BNIP1,MSH6,TMEM214,AHR,IRF1,TNFSF9,PLAGL2,TICAM1,EGLN3,MKNK2,RAF1,RRP8,RIPK1,IER3,BCL2L10,TRAF4,ACIN1,C19orf10,IL1A,BIRC3,SLC9A1,CBL,MUL1,ALS2,FOSL2,LEF1,PHLDA1,EMP3,MEF2D,RHOB,CSRNP1,EAF2,DLC1,TNFRSF10B,PAK1,SLC25A4,SH3RF1,SHISA5,FADD,IL12A,CEBPB,PRKCE,DDIT4,CYCS,ZNF622,TNFRSF10D,PPARD,CFLAR,DAB2,CLU…
GO:0006468	protein phosphorylation	130	923	0.19	0.00012	9606.ENSP00000013125,9606.ENSP00000220751,9606.ENSP00000224140,9606.ENSP00000226574,9606.ENSP00000229395,9606.ENSP00000230990,9606.ENSP00000240874,9606.ENSP00000244869,9606.ENSP00000246914,9606.ENSP00000249075,9606.ENSP00000250896,9606.ENSP00000251849,9606.ENSP00000254066,9606.ENSP00000256383,9606.ENSP00000256458,9606.ENSP00000259808,9606.ENSP00000261845,9606.ENSP00000262039,9606.ENSP00000262065,…	MAP4K5,RIPK2,SETX,NFKB1,FGFR1OP2,HBEGF,KALRN,EREG,WNK4,LIF,MKNK2,RAF1,RARA,EIF2S1,IRAK2,RIPK1,MAPK6,PIK3C3,MMD,CCNE1,MAP3K8,ACVR1,MAP4K3,CCNT2,MUL1,RAPGEF2,MAP3K13,NRP1,GTF2H1,SIK1,SCYL1,PLK2,PAK1,FLT1,RIOK2,PRKAG2,BRAF,STAT5B,FGF19,SNRK,LMTK2,ADORA2B,SIK2,PRKCE,PPM1D,EIF2AK3,RPS6KB2,TRIB1,TLK2,CLK4,PIBF1,STK17A,KARS,PDGFB,RIPK4,HSP90AA1,TRIO,RIOK3,BAZ1B,MAP2K3,PDGFA,EPHA2,PELI1,PIM3,MTOR,AKAP13,…
GO:0051716	cellular response to stimulus	659	6212	0.07	0.00012	9606.ENSP00000013125,9606.ENSP00000014914,9606.ENSP00000033079,9606.ENSP00000040738,9606.ENSP00000056217,9606.ENSP00000064780,9606.ENSP00000158771,9606.ENSP00000164024,9606.ENSP00000164133,9606.ENSP00000164227,9606.ENSP00000166139,9606.ENSP00000171111,9606.ENSP00000179259,9606.ENSP00000185150,9606.ENSP00000200453,9606.ENSP00000202556,9606.ENSP00000209728,9606.ENSP00000212015,9606.ENSP00000215904,…	MAP4K5,GPRC5A,FAM13B,BOD1L1,ARHGEF5,RELT,DERL2,CELSR3,PPP2R5B,BCL3,FSTL3,KEAP1,C12orf5,ERLEC1,PPP1R15A,PPP1R13B,CDC6,SIRT1,PDXP,XBP1,HMOX1,SOS2,ALKBH1,BDKRB1,NFKBIA,EHD4,RHOV,AGO2,BRF2,RIPK2,GSR,RELB,SGTA,NAMPT,FKBP14,SERPINE1,SETX,PPIF,RASD1,AKAP10,NFKB1,IL10RA,PRDM4,CLEC4A,RAB35,GCLC,GUCA1B,HBEGF,MSH6,RNF103,ZFAND5,RHOQ,DUSP1,EGR1,KALRN,AHR,EGR2,SNAI1,EREG,IRF1,INSIG2,TNFSF9,C3,FOSB,PITHD1,NR1D…
GO:2000145	regulation of cell motility	117	807	0.2	0.00012	9606.ENSP00000212015,9606.ENSP00000216037,9606.ENSP00000216117,9606.ENSP00000216629,9606.ENSP00000220592,9606.ENSP00000223095,9606.ENSP00000230990,9606.ENSP00000244050,9606.ENSP00000244869,9606.ENSP00000249749,9606.ENSP00000251849,9606.ENSP00000254958,9606.ENSP00000260130,9606.ENSP00000260356,9606.ENSP00000262498,9606.ENSP00000263339,9606.ENSP00000263640,9606.ENSP00000264036,9606.ENSP00000264431,…	SIRT1,XBP1,HMOX1,BDKRB1,AGO2,SERPINE1,HBEGF,SNAI1,EREG,DLL4,RAF1,JAG1,SDCBP,THBS1,CFAP20,IL1A,ACVR1,MCAM,RAPGEF2,ICAM1,LEF1,SRF,NRP1,RHOB,PLK2,DLC1,PAK1,FLT1,NIPBL,PTPRR,FLCN,ITGA5,CXCL3,CXCL5,F2RL1,CRK,FADD,IL12A,PRKCE,CXCL8,ADAM17,PPARD,TRIB1,DAB2,SPHK1,SWAP70,SSH1,ZNF609,STX4,RAP2B,CALR,HSPA5,LAMA3,KARS,CSF1,PDGFB,SMAD3,ARID2,STARD13,CREB3,RNF41,MAP2K3,PDGFA,PTRF,EPHA2,P2RX4,ADARB1,MTOR,LRIG2,…
GO:0006793	phosphorus metabolic process	254	2086	0.13	0.00014	9606.ENSP00000013125,9606.ENSP00000179259,9606.ENSP00000200453,9606.ENSP00000210444,9606.ENSP00000215904,9606.ENSP00000220751,9606.ENSP00000221086,9606.ENSP00000222553,9606.ENSP00000224140,9606.ENSP00000226574,9606.ENSP00000227868,9606.ENSP00000229395,9606.ENSP00000230990,9606.ENSP00000238738,9606.ENSP00000239223,9606.ENSP00000240100,9606.ENSP00000240874,9606.ENSP00000244869,9606.ENSP00000246914,…	MAP4K5,C12orf5,PPP1R15A,NANS,PDXP,RIPK2,MTMR9,NAMPT,SETX,NFKB1,PDHX,FGFR1OP2,HBEGF,RHOQ,DUSP1,DUSP4,KALRN,EREG,WNK4,LIF,MKNK2,RAF1,RARA,ILKAP,EIF2S1,IRAK2,RIPK1,EPT1,LIPG,N4BP2,RORA,LPIN2,COX10,MAPK6,PIK3C3,MMD,CCNE1,MAP3K8,ITPKC,ACVR1,MAP4K3,LCAT,CCNT2,MUL1,PIKFYVE,RAPGEF2,MAP3K13,NRP1,CHKA,GTF2H1,SIK1,SCYL1,SLC20A1,RAB5A,PLK2,PAK1,PPP4C,FLT1,PPM1B,RIOK2,PTPRR,UBASH3B,CA3,PRKAG2,IPPK,BRAF,DUSP2,…
GO:0031668	cellular response to extracellular stimulus	47	235	0.34	0.00014	9606.ENSP00000212015,9606.ENSP00000215904,9606.ENSP00000216037,9606.ENSP00000216117,9606.ENSP00000253063,9606.ENSP00000254605,9606.ENSP00000256383,9606.ENSP00000262039,9606.ENSP00000264033,9606.ENSP00000264832,9606.ENSP00000265354,9606.ENSP00000266458,9606.ENSP00000276925,9606.ENSP00000297991,9606.ENSP00000298552,9606.ENSP00000299767,9606.ENSP00000304004,9606.ENSP00000304501,9606.ENSP00000306245,…	SIRT1,PDXP,XBP1,HMOX1,SESN2,RRP8,EIF2S1,PIK3C3,CBL,ICAM1,SRF,GABARAPL1,CDKN2B,AQP3,TSC1,HSP90B1,FOXA3,ADORA2B,FOS,PPM1D,EIF2AK3,TBL2,FOSL1,SSH1,HSPA5,PMAIP1,UPP1,CAV1,MIOS,ATF3,NR4A2,P2RX4,MTOR,NUAK2,GLRX2,JUN,RRAGC,ZC3H12A,PIM1,NFE2L2,MTMR3,CDKN1A,ATP2B1,CADPS2,FNIP1,ZFYVE1,BHLHA15
GO:0033674	positive regulation of kinase activity	87	553	0.24	0.00014	9606.ENSP00000013125,9606.ENSP00000056217,9606.ENSP00000179259,9606.ENSP00000209728,9606.ENSP00000212015,9606.ENSP00000215631,9606.ENSP00000220751,9606.ENSP00000239938,9606.ENSP00000244869,9606.ENSP00000251849,9606.ENSP00000252809,9606.ENSP00000256458,9606.ENSP00000259808,9606.ENSP00000260356,9606.ENSP00000261254,9606.ENSP00000262065,9606.ENSP00000262395,9606.ENSP00000263056,9606.ENSP00000263881,…	MAP4K5,ARHGEF5,C12orf5,CDC6,SIRT1,GADD45B,RIPK2,EGR1,EREG,RAF1,GDF15,IRAK2,RIPK1,THBS1,CCND2,MMD,TRAF4,MAP3K8,MAP4K3,CCNT2,MUL1,ALS2,RAPGEF2,MAP3K13,MAPKAP1,TNFRSF10B,PAK1,FBXW7,FLT1,PRKAG2,BRAF,TGFA,CCNL1,CRK,LRP8,ADORA2B,ADAM17,ZNF622,CLU,DVL3,PIBF1,HSPH1,MALT1,KARS,CSF1,PDGFB,HSP90AA1,SPDYA,MAP2K3,PDGFA,MTOR,AKAP13,PROX1,MAPKAPK2,DDR2,DUSP12,PEA15,EFNA1,IL6R,DUSP5,SLK,AVPI1,GADD45A,PTPN1,RAPGE…
GO:0040017	positive regulation of locomotion	81	503	0.25	0.00014	9606.ENSP00000212015,9606.ENSP00000216037,9606.ENSP00000216117,9606.ENSP00000216629,9606.ENSP00000217402,9606.ENSP00000220592,9606.ENSP00000223095,9606.ENSP00000230990,9606.ENSP00000244050,9606.ENSP00000260130,9606.ENSP00000260356,9606.ENSP00000262498,9606.ENSP00000263339,9606.ENSP00000263640,9606.ENSP00000264036,9606.ENSP00000264431,9606.ENSP00000264832,9606.ENSP00000265165,9606.ENSP00000265371,…	SIRT1,XBP1,HMOX1,BDKRB1,CHMP4B,AGO2,SERPINE1,HBEGF,SNAI1,SDCBP,THBS1,CFAP20,IL1A,ACVR1,MCAM,RAPGEF2,ICAM1,LEF1,NRP1,VPS37B,RHOB,PLK2,PAK1,FLT1,NIPBL,ITGA5,CXCL3,CXCL5,F2RL1,CRK,FADD,IL12A,PRKCE,CXCL8,ADAM17,DAB2,SPHK1,SWAP70,SSH1,ZNF609,STX4,CALR,HSPA5,KARS,CSF1,PDGFB,SMAD3,STX3,CREB3,MAP2K3,PDGFA,PTRF,P2RX4,MTOR,PROX1,DDR2,IL6R,NUS1,JUN,PPAP2B,PLAU,ZC3H12A,IRS2,SPRY2,BMP2,EDN1,GCNT2,CD274,GPNMB,…
GO:0045937	positive regulation of phosphate metabolic process	144	1052	0.18	0.00014	9606.ENSP00000013125,9606.ENSP00000056217,9606.ENSP00000179259,9606.ENSP00000200453,9606.ENSP00000209728,9606.ENSP00000212015,9606.ENSP00000215631,9606.ENSP00000216037,9606.ENSP00000220325,9606.ENSP00000220751,9606.ENSP00000221086,9606.ENSP00000230361,9606.ENSP00000230990,9606.ENSP00000239938,9606.ENSP00000244869,9606.ENSP00000245907,9606.ENSP00000249075,9606.ENSP00000251849,9606.ENSP00000252809,…	MAP4K5,ARHGEF5,C12orf5,PPP1R15A,CDC6,SIRT1,GADD45B,XBP1,EHD4,RIPK2,MTMR9,GUCA1B,HBEGF,EGR1,EREG,C3,LIF,RAF1,GDF15,IRAK2,RIPK1,SDCBP,THBS1,CCND2,SEMA7A,MMD,TRAF4,C19orf10,MAP3K8,ACVR1,MAP4K3,CCNT2,MUL1,ALS2,RAPGEF2,DNAJC27,ICAM1,MAP3K13,NRP1,MAPKAP1,GAREM,DLC1,TNFRSF10B,PAK1,FBXW7,FLT1,SH3RF1,FLCN,PRKAG2,BRAF,ITGA5,FGF19,TGFA,CCNL1,SENP2,F2RL1,TERF2IP,CRK,IL12A,LRP8,ADORA2B,PRKCE,CLCF1,ADAM17,ZNF6…
GO:0042176	regulation of protein catabolic process	64	368	0.28	0.00017	9606.ENSP00000158771,9606.ENSP00000171111,9606.ENSP00000185150,9606.ENSP00000216037,9606.ENSP00000221566,9606.ENSP00000229416,9606.ENSP00000234111,9606.ENSP00000256497,9606.ENSP00000260130,9606.ENSP00000262384,9606.ENSP00000264639,9606.ENSP00000274289,9606.ENSP00000281708,9606.ENSP00000287437,9606.ENSP00000294179,9606.ENSP00000304051,9606.ENSP00000305790,9606.ENSP00000312150,9606.ENSP00000313391,…	DERL2,KEAP1,ERLEC1,XBP1,SGTA,GCLC,ODC1,EDEM1,SDCBP,N4BP1,PSMD3,PLK2,FBXW7,NSMCE2,STX5,RNF139,SF3B3,TRIB1,DAB2,ZFAND2A,CLU,TLK2,RCHY1,RNF166,YOD1,SMAD3,HSP90AA1,DNAJB2,CAV1,RNF41,NRD1,WAC,MYLIP,VCP,DDA1,SMURF1,LRIG2,EFNA1,BTRC,LONRF3,PLK3,RNF19B,TRIM39,TAF9,CSNK1E,NFE2L2,LONRF1,TMF1,USP25,NEDD4L,RDX,RELA,ARNTL,HIPK2,HERPUD1,RIC1,RYBP,TIPARP,SH3RF2,UBE2J1,LDLR,OAZ1,ITCH,TNFAIP3
GO:0045089	positive regulation of innate immune response	50	259	0.33	0.00017	9606.ENSP00000216797,9606.ENSP00000220751,9606.ENSP00000221452,9606.ENSP00000226574,9606.ENSP00000229332,9606.ENSP00000244869,9606.ENSP00000248244,9606.ENSP00000251849,9606.ENSP00000256458,9606.ENSP00000259808,9606.ENSP00000262039,9606.ENSP00000262510,9606.ENSP00000278568,9606.ENSP00000284274,9606.ENSP00000293328,9606.ENSP00000296677,9606.ENSP00000299767,9606.ENSP00000301838,9606.ENSP00000303231,…	NFKBIA,RIPK2,RELB,NFKB1,CLEC4A,EREG,TICAM1,RAF1,IRAK2,RIPK1,PIK3C3,NLRC5,PAK1,OTULIN,STAT5B,F2RL1,HSP90B1,FADD,IL12A,PRKCE,MALT1,POLR3C,CAV1,RIOK3,PSPC1,ANKRD17,PELI1,MAPKAPK2,CHUK,BCL10,HSPA1B,HLA-E,DDX58,TRIM5,RSAD2,AP1G1,POLR3D,RELA,TLR6,CYLD,PVR,MUC20,MUC4,TRAF6,UBC,TRAF3,RPS6KA5,ITCH,TNFAIP3,IKBKG
GO:0006470	protein dephosphorylation	41	194	0.37	0.00018	9606.ENSP00000200453,9606.ENSP00000215904,9606.ENSP00000239223,9606.ENSP00000240100,9606.ENSP00000254654,9606.ENSP00000279387,9606.ENSP00000282412,9606.ENSP00000283228,9606.ENSP00000284273,9606.ENSP00000288943,9606.ENSP00000298573,9606.ENSP00000303706,9606.ENSP00000306682,9606.ENSP00000307786,9606.ENSP00000308318,9606.ENSP00000315713,9606.ENSP00000325074,9606.ENSP00000344909,9606.ENSP00000346255,…	PPP1R15A,PDXP,DUSP1,DUSP4,ILKAP,PPP4C,PPM1B,PTPRR,UBASH3B,DUSP2,DUSP16,CDC25A,PPM1D,CYCS,PPP1R3B,SSH1,PPP2R2A,PTP4A2,PPTC7,CDC14A,DUSP10,PPP1R15B,DUSP12,DUSP5,BTRC,DNAJC6,PPAP2B,PTPN1,EYA3,PTPRH,PDP1,DUSP8,PPP3CC,TPTE2,PPP4R1,MTMR3,PPP2CA,DAPP1,PTPN21,PHLPP2,RPAP2
GO:0007249	I-kappaB kinase/NF-kappaB signaling	22	70	0.54	0.00019	9606.ENSP00000164227,9606.ENSP00000216797,9606.ENSP00000220751,9606.ENSP00000221452,9606.ENSP00000226574,9606.ENSP00000248244,9606.ENSP00000256458,9606.ENSP00000259808,9606.ENSP00000263464,9606.ENSP00000295025,9606.ENSP00000296215,9606.ENSP00000354911,9606.ENSP00000358983,9606.ENSP00000359424,9606.ENSP00000359612,9606.ENSP00000393785,9606.ENSP00000433623,9606.ENSP00000441543,9606.ENSP00000468263,…	BCL3,NFKBIA,RIPK2,RELB,NFKB1,TICAM1,IRAK2,RIPK1,BIRC3,REL,SNIP1,TIFA,NFKB2,CHUK,BCL10,NKIRAS1,TRAF6,UBC,ERC1,BIRC2,MAP3K14,IKBKG
GO:1903050	regulation of proteolysis involved in cellular protein catabolic process	44	216	0.35	0.00019	9606.ENSP00000158771,9606.ENSP00000171111,9606.ENSP00000185150,9606.ENSP00000216037,9606.ENSP00000221566,9606.ENSP00000229416,9606.ENSP00000256497,9606.ENSP00000260130,9606.ENSP00000262384,9606.ENSP00000274289,9606.ENSP00000281708,9606.ENSP00000287437,9606.ENSP00000304051,9606.ENSP00000312150,9606.ENSP00000313391,9606.ENSP00000314619,9606.ENSP00000315130,9606.ENSP00000316512,9606.ENSP00000321239,…	DERL2,KEAP1,ERLEC1,XBP1,SGTA,GCLC,EDEM1,SDCBP,N4BP1,PLK2,FBXW7,NSMCE2,RNF139,TRIB1,DAB2,ZFAND2A,CLU,TLK2,RCHY1,RNF166,YOD1,DNAJB2,CAV1,WAC,VCP,DDA1,SMURF1,EFNA1,BTRC,LONRF3,PLK3,RNF19B,TRIM39,TAF9,CSNK1E,NFE2L2,LONRF1,TMF1,USP25,HIPK2,HERPUD1,RYBP,SH3RF2,UBE2J1
GO:0040012	regulation of locomotion	124	881	0.19	0.0002	9606.ENSP00000212015,9606.ENSP00000216037,9606.ENSP00000216117,9606.ENSP00000216629,9606.ENSP00000217402,9606.ENSP00000220592,9606.ENSP00000223095,9606.ENSP00000230990,9606.ENSP00000244050,9606.ENSP00000244869,9606.ENSP00000249749,9606.ENSP00000251849,9606.ENSP00000254958,9606.ENSP00000260130,9606.ENSP00000260356,9606.ENSP00000262498,9606.ENSP00000263339,9606.ENSP00000263640,9606.ENSP00000264036,…	SIRT1,XBP1,HMOX1,BDKRB1,CHMP4B,AGO2,SERPINE1,HBEGF,SNAI1,EREG,DLL4,RAF1,JAG1,SDCBP,THBS1,CFAP20,IL1A,ACVR1,MCAM,RAPGEF2,ICAM1,ARRDC3,LEF1,SRF,NRP1,VPS37B,RHOB,PLK2,DLC1,PAK1,FLT1,NIPBL,PTPRR,TRIM11,FLCN,ITGA5,CXCL3,CXCL5,F2RL1,CRK,FADD,IL12A,PRKCE,CXCL8,ADAM17,PPARD,TRIB1,DAB2,SPHK1,SWAP70,SSH1,ZNF609,STX4,RAP2B,CALR,HSPA5,LAMA3,KARS,CSF1,PDGFB,SMAD3,ARID2,STX3,STARD13,CREB3,RNF41,MAP2K3,PDGFA,PT…
GO:0043900	regulation of multi-organism process	98	653	0.22	0.0002	9606.ENSP00000216797,9606.ENSP00000217402,9606.ENSP00000220592,9606.ENSP00000220751,9606.ENSP00000221452,9606.ENSP00000226574,9606.ENSP00000229332,9606.ENSP00000244869,9606.ENSP00000245414,9606.ENSP00000246672,9606.ENSP00000248244,9606.ENSP00000251849,9606.ENSP00000252229,9606.ENSP00000256458,9606.ENSP00000257570,9606.ENSP00000257604,9606.ENSP00000259808,9606.ENSP00000262039,9606.ENSP00000262510,…	NFKBIA,CHMP4B,AGO2,RIPK2,RELB,NFKB1,CLEC4A,EREG,IRF1,NR1D1,TICAM1,RAF1,MICB,IRAK2,OASL,TRAFD1,RIPK1,PIK3C3,NLRC5,UFD1L,BIRC3,OSBP,MUL1,LEF1,VPS37B,PAK1,PPM1B,OTULIN,TRIM11,IFNGR2,STAT5B,F2RL1,HSP90B1,CRK,FADD,IL12A,PRKCE,CXCL8,ISG20,PDE12,TRIB1,MALT1,CALR,P4HB,IFNLR1,SOCS3,NPLOC4,POLR3C,RRP1B,CAV1,RIOK3,CREB3,PSPC1,TBC1D20,TRIM38,ANKRD17,PELI1,ADARB1,GPATCH3,DUSP10,PROX1,MAPKAPK2,PRDM1,CHUK,BCL10…
GO:0002833	positive regulation of response to biotic stimulus	52	277	0.32	0.00021	9606.ENSP00000216797,9606.ENSP00000220751,9606.ENSP00000221452,9606.ENSP00000226574,9606.ENSP00000229332,9606.ENSP00000244869,9606.ENSP00000248244,9606.ENSP00000251849,9606.ENSP00000256458,9606.ENSP00000259808,9606.ENSP00000262039,9606.ENSP00000262510,9606.ENSP00000278568,9606.ENSP00000284274,9606.ENSP00000293328,9606.ENSP00000296677,9606.ENSP00000299767,9606.ENSP00000301838,9606.ENSP00000303231,…	NFKBIA,RIPK2,RELB,NFKB1,CLEC4A,EREG,TICAM1,RAF1,IRAK2,RIPK1,PIK3C3,NLRC5,PAK1,OTULIN,STAT5B,F2RL1,HSP90B1,FADD,IL12A,PRKCE,MALT1,POLR3C,CAV1,RIOK3,PSPC1,ANKRD17,PELI1,MAPKAPK2,CHUK,BCL10,HSPA1B,HLA-E,OPTN,DDX58,TRIM5,CD274,RSAD2,AP1G1,POLR3D,RELA,TLR6,CYLD,PVR,MUC20,MUC4,TRAF6,UBC,TRAF3,RPS6KA5,ITCH,TNFAIP3,IKBKG
GO:0042221	response to chemical	459	4153	0.09	0.00021	9606.ENSP00000056217,9606.ENSP00000064780,9606.ENSP00000158771,9606.ENSP00000164024,9606.ENSP00000164133,9606.ENSP00000166139,9606.ENSP00000171111,9606.ENSP00000179259,9606.ENSP00000185150,9606.ENSP00000209728,9606.ENSP00000212015,9606.ENSP00000215904,9606.ENSP00000216037,9606.ENSP00000216117,9606.ENSP00000216489,9606.ENSP00000216629,9606.ENSP00000216797,9606.ENSP00000220325,9606.ENSP00000220592,…	ARHGEF5,RELT,DERL2,CELSR3,PPP2R5B,FSTL3,KEAP1,C12orf5,ERLEC1,CDC6,SIRT1,PDXP,XBP1,HMOX1,ALKBH1,BDKRB1,NFKBIA,EHD4,AGO2,BRF2,RIPK2,GSR,RELB,SGTA,NAMPT,FKBP14,SERPINE1,SETX,PPIF,NFKB1,IL10RA,CYP27B1,RAB35,GCLC,HBEGF,SLC1A4,RGS2,SLC19A2,RNF103,ABCG2,RHOQ,DUSP1,EGR1,KALRN,AHR,EGR2,EREG,IRF1,INSIG2,TNFSF9,FOSB,NR1D1,TICAM1,SDF2L1,LIF,DNAJB9,DLL4,EGLN3,MKNK2,RAF1,MED17,MICB,GDF15,JUND,NUMBL,SESN2,AOC2,…
GO:0007030	Golgi organization	26	95	0.48	0.00022	9606.ENSP00000163416,9606.ENSP00000234160,9606.ENSP00000258654,9606.ENSP00000262225,9606.ENSP00000265070,9606.ENSP00000267622,9606.ENSP00000294179,9606.ENSP00000311336,9606.ENSP00000319169,9606.ENSP00000330945,9606.ENSP00000331487,9606.ENSP00000346139,9606.ENSP00000358071,9606.ENSP00000359000,9606.ENSP00000359665,9606.ENSP00000360183,9606.ENSP00000361057,9606.ENSP00000361275,9606.ENSP00000361522,…	GOLGA5,GORASP2,COG3,TMED2,GOLPH3,TRIP11,STX5,ATP8B3,PRMT5,TMED9,NPLOC4,TBC1D20,SEC23IP,GBF1,PI4K2A,STX16,SURF4,PLK3,TJAP1,PLEKHM2,OPTN,KIFC3,GOLGB1,RAB30,USO1,BHLHA15
GO:0032101	regulation of response to external stimulus	132	955	0.18	0.00022	9606.ENSP00000216797,9606.ENSP00000220751,9606.ENSP00000221452,9606.ENSP00000223095,9606.ENSP00000226574,9606.ENSP00000228606,9606.ENSP00000229332,9606.ENSP00000230361,9606.ENSP00000244869,9606.ENSP00000245414,9606.ENSP00000245907,9606.ENSP00000246672,9606.ENSP00000248244,9606.ENSP00000251849,9606.ENSP00000252229,9606.ENSP00000256458,9606.ENSP00000257604,9606.ENSP00000259808,9606.ENSP00000260356,…	NFKBIA,RIPK2,RELB,SERPINE1,NFKB1,CYP27B1,CLEC4A,GUCA1B,EREG,IRF1,C3,NR1D1,TICAM1,RAF1,MICB,IRAK2,TRAFD1,RIPK1,THBS1,RORA,SEMA7A,PIK3C3,NLRC5,VAMP7,UFD1L,BRD4,BIRC3,MUL1,NRP1,FEM1A,PAK1,PPM1B,UBASH3B,OTULIN,IFNGR2,STAT5B,CXCL3,CXCL5,F2RL1,HSP90B1,CRK,FADD,IL12A,ADORA2B,PRKCE,CXCL8,ADAM17,NR1D2,PPARD,TRIB1,PER1,CLU,SWAP70,METRNL,STX4,MALT1,CALR,KARS,CSF1,IFNLR1,SOCS3,PDGFB,NPLOC4,SMAD3,NDEL1,POLR3C…
GO:0045934	negative regulation of nucleobase-containing compound metabolic process	183	1424	0.15	0.00022	9606.ENSP00000157600,9606.ENSP00000164227,9606.ENSP00000179259,9606.ENSP00000209728,9606.ENSP00000212015,9606.ENSP00000216037,9606.ENSP00000221452,9606.ENSP00000222329,9606.ENSP00000225174,9606.ENSP00000225688,9606.ENSP00000226574,9606.ENSP00000229416,9606.ENSP00000230321,9606.ENSP00000234198,9606.ENSP00000234420,9606.ENSP00000239223,9606.ENSP00000239938,9606.ENSP00000242057,9606.ENSP00000244050,…	LMCD1,BCL3,C12orf5,CDC6,SIRT1,XBP1,RELB,ERF,PPIF,RASD1,NFKB1,GCLC,MDFI,DLX2,MSH6,DUSP1,EGR1,AHR,SNAI1,EREG,IRF1,FOSB,NR1D1,DLL4,JUND,RARA,THAP1,DNAJB1,RRP8,H3F3B,MBD2,BHLHE40,TBX3,BACH2,AKIRIN2,USP2,TRIM37,CCNE1,ACIN1,EPC1,MXD1,LEF1,SRF,CREM,BTAF1,JDP2,CCRN4L,FBXW7,NIPBL,TRIM11,FLCN,BTG2,ZNF281,REL,MITF,NFIL3,TERF2IP,RUNX1,JUNB,LRP8,CEBPB,PPM1D,DDIT4,ZBTB5,ZNF608,ZNF239,MEPCE,ZNF431,PDE12,NR1D2,P…
GO:0051253	negative regulation of RNA metabolic process	170	1303	0.16	0.00022	9606.ENSP00000157600,9606.ENSP00000164227,9606.ENSP00000212015,9606.ENSP00000216037,9606.ENSP00000221452,9606.ENSP00000222329,9606.ENSP00000225688,9606.ENSP00000226574,9606.ENSP00000229416,9606.ENSP00000230321,9606.ENSP00000234198,9606.ENSP00000239938,9606.ENSP00000242057,9606.ENSP00000244050,9606.ENSP00000244869,9606.ENSP00000245414,9606.ENSP00000245919,9606.ENSP00000246672,9606.ENSP00000249749,…	LMCD1,BCL3,SIRT1,XBP1,RELB,ERF,RASD1,NFKB1,GCLC,MDFI,DLX2,EGR1,AHR,SNAI1,EREG,IRF1,FOSB,NR1D1,DLL4,JUND,RARA,THAP1,DNAJB1,RRP8,H3F3B,MBD2,BHLHE40,TBX3,BACH2,AKIRIN2,USP2,TRIM37,CCNE1,ACIN1,EPC1,MXD1,LEF1,SRF,CREM,BTAF1,JDP2,CCRN4L,NIPBL,TRIM11,FLCN,BTG2,ZNF281,REL,MITF,NFIL3,RUNX1,JUNB,LRP8,CEBPB,PPM1D,ZBTB5,ZNF608,ZNF239,MEPCE,ZNF431,NR1D2,PPARD,DAB2,PER1,ZHX2,USP9X,SUPT6H,PRMT5,CALR,RNF168,SIAH…
GO:1903507	negative regulation of nucleic acid-templated transcription	161	1220	0.16	0.00022	9606.ENSP00000157600,9606.ENSP00000164227,9606.ENSP00000212015,9606.ENSP00000216037,9606.ENSP00000221452,9606.ENSP00000222329,9606.ENSP00000225688,9606.ENSP00000226574,9606.ENSP00000229416,9606.ENSP00000230321,9606.ENSP00000234198,9606.ENSP00000239938,9606.ENSP00000242057,9606.ENSP00000244050,9606.ENSP00000244869,9606.ENSP00000245414,9606.ENSP00000245919,9606.ENSP00000246672,9606.ENSP00000249749,…	LMCD1,BCL3,SIRT1,XBP1,RELB,ERF,RASD1,NFKB1,GCLC,MDFI,DLX2,EGR1,AHR,SNAI1,EREG,IRF1,FOSB,NR1D1,DLL4,JUND,RARA,THAP1,DNAJB1,RRP8,H3F3B,MBD2,BHLHE40,TBX3,BACH2,AKIRIN2,USP2,TRIM37,CCNE1,EPC1,MXD1,LEF1,SRF,CREM,BTAF1,JDP2,NIPBL,TRIM11,FLCN,BTG2,ZNF281,REL,MITF,NFIL3,RUNX1,JUNB,LRP8,CEBPB,PPM1D,ZBTB5,ZNF608,ZNF239,MEPCE,ZNF431,NR1D2,PPARD,DAB2,PER1,ZHX2,USP9X,SUPT6H,PRMT5,CALR,RNF168,SIAH2,PDGFB,TOB2,…
GO:2001233	regulation of apoptotic signaling pathway	66	388	0.27	0.00022	9606.ENSP00000198767,9606.ENSP00000202556,9606.ENSP00000212015,9606.ENSP00000216037,9606.ENSP00000216117,9606.ENSP00000223095,9606.ENSP00000225174,9606.ENSP00000229416,9606.ENSP00000244050,9606.ENSP00000246229,9606.ENSP00000251849,9606.ENSP00000259808,9606.ENSP00000260356,9606.ENSP00000260442,9606.ENSP00000263339,9606.ENSP00000263640,9606.ENSP00000264198,9606.ENSP00000264832,9606.ENSP00000265371,…	RRN3,PPP1R13B,SIRT1,XBP1,HMOX1,SERPINE1,PPIF,GCLC,SNAI1,PLAGL2,RAF1,RIPK1,THBS1,BCL2L10,IL1A,ACVR1,MUL1,ICAM1,NRP1,TNFRSF10B,FBXW7,SH3RF1,FADD,YWHAG,EIF2AK3,CFLAR,CLU,STX4,HSPH1,SIAH2,PMAIP1,TNFRSF12A,P4HB,SMAD3,CAV1,PLAUR,SFN,TP53BP2,CREB3,ATF3,NR4A2,PEA15,MCL1,GCLM,BCL10,PTPN1,EYA3,BAK1,HSPA1B,TRIM39,SYVN1,TAF9,NKX3-1,SGK3,NFE2L2,VIMP,RELA,CYLD,BIRC6,HERPUD1,SKIL,DAPK3,DDIT3,BDKRB2,DEDD2,TNFAIP3
GO:0006796	phosphate-containing compound metabolic process	250	2065	0.12	0.00023	9606.ENSP00000013125,9606.ENSP00000179259,9606.ENSP00000200453,9606.ENSP00000215904,9606.ENSP00000220751,9606.ENSP00000221086,9606.ENSP00000222553,9606.ENSP00000224140,9606.ENSP00000226574,9606.ENSP00000227868,9606.ENSP00000229395,9606.ENSP00000230990,9606.ENSP00000238738,9606.ENSP00000239223,9606.ENSP00000240100,9606.ENSP00000240874,9606.ENSP00000244869,9606.ENSP00000246914,9606.ENSP00000249075,…	MAP4K5,C12orf5,PPP1R15A,PDXP,RIPK2,MTMR9,NAMPT,SETX,NFKB1,PDHX,FGFR1OP2,HBEGF,RHOQ,DUSP1,DUSP4,KALRN,EREG,WNK4,LIF,MKNK2,RAF1,RARA,ILKAP,EIF2S1,IRAK2,RIPK1,EPT1,LIPG,N4BP2,RORA,LPIN2,COX10,MAPK6,PIK3C3,MMD,CCNE1,MAP3K8,ITPKC,ACVR1,MAP4K3,LCAT,CCNT2,MUL1,PIKFYVE,RAPGEF2,MAP3K13,NRP1,CHKA,GTF2H1,SIK1,SCYL1,SLC20A1,RAB5A,PLK2,PAK1,PPP4C,FLT1,PPM1B,RIOK2,PTPRR,UBASH3B,CA3,PRKAG2,IPPK,BRAF,DUSP2,ABHD3…
GO:0010243	response to organonitrogen compound	123	876	0.19	0.00023	9606.ENSP00000158771,9606.ENSP00000185150,9606.ENSP00000209728,9606.ENSP00000212015,9606.ENSP00000215904,9606.ENSP00000216037,9606.ENSP00000216797,9606.ENSP00000220751,9606.ENSP00000221566,9606.ENSP00000226574,9606.ENSP00000229416,9606.ENSP00000235382,9606.ENSP00000237455,9606.ENSP00000238738,9606.ENSP00000239223,9606.ENSP00000239938,9606.ENSP00000240874,9606.ENSP00000242057,9606.ENSP00000242480,…	DERL2,ERLEC1,CDC6,SIRT1,PDXP,XBP1,NFKBIA,RIPK2,SGTA,NFKB1,GCLC,RGS2,RNF103,RHOQ,DUSP1,EGR1,KALRN,AHR,EGR2,EREG,INSIG2,FOSB,TICAM1,SDF2L1,DNAJB9,JUND,SESN2,JAG1,BTG1,EDEM1,KIAA0368,FAF2,PIK3C3,UFD1L,ZNF106,SLC9A1,RAPGEF2,ICAM1,GAL,GET4,EIF2B2,NPC1,PAK1,QDPR,BTG2,STAT5B,TSC1,HSP90B1,CRK,FADD,JUNB,RNF139,CEBPB,PRKCE,FOS,SLC25A33,YWHAG,FOSL1,CFLAR,PER1,SSH1,HMGCS1,HSPA5,PPP2R2A,YOD1,NPLOC4,PDE4B,NDEL…
GO:0051347	positive regulation of transferase activity	95	630	0.22	0.00023	9606.ENSP00000013125,9606.ENSP00000056217,9606.ENSP00000179259,9606.ENSP00000209728,9606.ENSP00000212015,9606.ENSP00000215631,9606.ENSP00000220751,9606.ENSP00000239938,9606.ENSP00000244869,9606.ENSP00000251849,9606.ENSP00000252809,9606.ENSP00000256458,9606.ENSP00000259808,9606.ENSP00000260247,9606.ENSP00000260356,9606.ENSP00000261254,9606.ENSP00000262065,9606.ENSP00000262395,9606.ENSP00000263056,…	MAP4K5,ARHGEF5,C12orf5,CDC6,SIRT1,GADD45B,RIPK2,EGR1,EREG,RAF1,GDF15,IRAK2,RIPK1,DCUN1D5,THBS1,CCND2,MMD,TRAF4,MAP3K8,MAP4K3,CCNT2,MUL1,ALS2,RAPGEF2,MAP3K13,ARRDC3,MAPKAP1,ARRDC4,TNFRSF10B,PAK1,FBXW7,FLT1,PRKAG2,BRAF,TGFA,CCNL1,CRK,LRP8,ADORA2B,ADAM17,ZNF622,CLU,DVL3,PIBF1,HSPH1,MALT1,DCUN1D3,KARS,CSF1,PDGFB,HSP90AA1,SPDYA,MAP2K3,PDGFA,TOPORS,MTOR,AKAP13,PROX1,MAPKAPK2,DDR2,DUSP12,PEA15,EFNA1,IL6…
GO:0009967	positive regulation of signal transduction	190	1493	0.15	0.00024	9606.ENSP00000013125,9606.ENSP00000056217,9606.ENSP00000157600,9606.ENSP00000164133,9606.ENSP00000202556,9606.ENSP00000212015,9606.ENSP00000215631,9606.ENSP00000216037,9606.ENSP00000216373,9606.ENSP00000220751,9606.ENSP00000225174,9606.ENSP00000226574,9606.ENSP00000228606,9606.ENSP00000230990,9606.ENSP00000244869,9606.ENSP00000245907,9606.ENSP00000246229,9606.ENSP00000248244,9606.ENSP00000249075,…	MAP4K5,ARHGEF5,LMCD1,PPP2R5B,PPP1R13B,SIRT1,GADD45B,XBP1,SOS2,RIPK2,PPIF,NFKB1,CYP27B1,HBEGF,EREG,C3,PLAGL2,TICAM1,LIF,DLL4,RAF1,GDF15,JAG1,MBD2,IRAK2,RIPK1,SDCBP,THBS1,SEMA7A,TRAF4,NLRC5,C19orf10,MAP3K8,BRD4,BIRC3,ACVR1,MAP4K3,SLC9A1,CBL,MUL1,ALS2,RAPGEF2,DNAJC27,ICAM1,MAP3K13,GOLPH3,NRP1,GAREM,PELO,TNFRSF10B,CDKN2B,PAK1,FBXW7,FLT1,SH3RF1,FLCN,BRAF,ITGA5,FGF19,REL,TGFA,F2RL1,TERF2IP,CRK,FADD,IL1…
GO:0051270	regulation of cellular component movement	124	886	0.19	0.00024	9606.ENSP00000212015,9606.ENSP00000216037,9606.ENSP00000216117,9606.ENSP00000216629,9606.ENSP00000220592,9606.ENSP00000223095,9606.ENSP00000230990,9606.ENSP00000244050,9606.ENSP00000244869,9606.ENSP00000249749,9606.ENSP00000251849,9606.ENSP00000254958,9606.ENSP00000260130,9606.ENSP00000260356,9606.ENSP00000262498,9606.ENSP00000263339,9606.ENSP00000263640,9606.ENSP00000264036,9606.ENSP00000264431,…	SIRT1,XBP1,HMOX1,BDKRB1,AGO2,SERPINE1,HBEGF,SNAI1,EREG,DLL4,RAF1,JAG1,SDCBP,THBS1,CFAP20,IL1A,ACVR1,MCAM,RAPGEF2,ICAM1,LEF1,SRF,NRP1,RHOB,PLK2,DLC1,PAK1,FLT1,NIPBL,PTPRR,FLCN,ITGA5,CXCL3,CXCL5,F2RL1,CRK,FADD,IL12A,PRKCE,CXCL8,ADAM17,PPARD,TRIB1,DAB2,SPHK1,SWAP70,SSH1,ZNF609,STX4,RAP2B,CALR,HSPA5,LAMA3,KARS,CSF1,PDGFB,PDE4B,SMAD3,ARID2,STARD13,CAV1,CREB3,RNF41,MAP2K3,PDGFA,PTRF,EPHA2,P2RX4,MAP2,AD…
GO:1901700	response to oxygen-containing compound	183	1427	0.15	0.00024	9606.ENSP00000064780,9606.ENSP00000209728,9606.ENSP00000212015,9606.ENSP00000215904,9606.ENSP00000216037,9606.ENSP00000216117,9606.ENSP00000216629,9606.ENSP00000216797,9606.ENSP00000220751,9606.ENSP00000223095,9606.ENSP00000224140,9606.ENSP00000225174,9606.ENSP00000226574,9606.ENSP00000227752,9606.ENSP00000228606,9606.ENSP00000229416,9606.ENSP00000235382,9606.ENSP00000238738,9606.ENSP00000239223,…	RELT,CDC6,SIRT1,PDXP,XBP1,HMOX1,BDKRB1,NFKBIA,RIPK2,SERPINE1,SETX,PPIF,NFKB1,IL10RA,CYP27B1,GCLC,RGS2,RHOQ,DUSP1,EGR1,KALRN,AHR,EGR2,EREG,INSIG2,FOSB,NR1D1,TICAM1,RAF1,MICB,JUND,SESN2,RARA,KDM6B,JAG1,BTG1,MBD2,IRAK2,EDEM1,AKIRIN2,RAB11FIP5,THBS1,RORA,PIK3C3,ADNP2,ZNF106,SLC9A1,CBL,RAPGEF2,ICAM1,SRF,GAL,EIF2B2,AKAP8,RHOB,TNFRSF10B,PAK1,CCRN4L,QDPR,CA3,BTG2,STAT5B,CXCL3,CXCL5,AQP3,TSC1,HSP90B1,CRK,…
GO:0033993	response to lipid	117	825	0.19	0.00026	9606.ENSP00000064780,9606.ENSP00000216037,9606.ENSP00000216629,9606.ENSP00000216797,9606.ENSP00000220751,9606.ENSP00000223095,9606.ENSP00000224140,9606.ENSP00000226574,9606.ENSP00000227752,9606.ENSP00000228606,9606.ENSP00000239223,9606.ENSP00000242057,9606.ENSP00000245787,9606.ENSP00000245919,9606.ENSP00000246672,9606.ENSP00000248244,9606.ENSP00000251871,9606.ENSP00000252229,9606.ENSP00000252818,…	RELT,XBP1,BDKRB1,NFKBIA,RIPK2,SERPINE1,SETX,NFKB1,IL10RA,CYP27B1,DUSP1,AHR,INSIG2,FOSB,NR1D1,TICAM1,MED17,MICB,JUND,RARA,MBD2,IRAK2,AKIRIN2,THBS1,RORA,ADNP2,CCNE1,CBL,ICAM1,SOX30,LEF1,NPC1,AKAP8,TNFRSF10B,CCRN4L,STAT5B,CXCL3,CXCL5,AQP3,IL12A,JUNB,LRP8,CEBPB,PRKCE,FOS,CXCL8,DDIT4,ADAM17,NR1D2,FOSL1,TNFRSF10D,PPARD,TRIB1,CFLAR,NFKBIB,CALR,HMGCS1,PDE4B,CAV1,NR4A2,INSIG1,PMEPA1,PELI1,SBNO2,CTR9,DUSP1…
GO:0045892	negative regulation of transcription, DNA-templated	155	1169	0.16	0.00026	9606.ENSP00000157600,9606.ENSP00000164227,9606.ENSP00000212015,9606.ENSP00000216037,9606.ENSP00000221452,9606.ENSP00000222329,9606.ENSP00000225688,9606.ENSP00000226574,9606.ENSP00000229416,9606.ENSP00000230321,9606.ENSP00000234198,9606.ENSP00000239938,9606.ENSP00000242057,9606.ENSP00000244050,9606.ENSP00000244869,9606.ENSP00000245414,9606.ENSP00000245919,9606.ENSP00000246672,9606.ENSP00000249749,…	LMCD1,BCL3,SIRT1,XBP1,RELB,ERF,RASD1,NFKB1,GCLC,MDFI,DLX2,EGR1,AHR,SNAI1,EREG,IRF1,FOSB,NR1D1,DLL4,JUND,RARA,THAP1,DNAJB1,RRP8,H3F3B,MBD2,BHLHE40,TBX3,BACH2,AKIRIN2,USP2,TRIM37,CCNE1,EPC1,MXD1,LEF1,SRF,CREM,BTAF1,JDP2,NIPBL,TRIM11,FLCN,BTG2,ZNF281,REL,MITF,NFIL3,RUNX1,JUNB,LRP8,CEBPB,PPM1D,ZBTB5,ZNF608,ZNF239,MEPCE,ZNF431,NR1D2,PPARD,DAB2,PER1,ZHX2,USP9X,SUPT6H,CALR,RNF168,PDGFB,SMAD3,ZNF202,OVOL…
GO:1902533	positive regulation of intracellular signal transduction	132	959	0.18	0.00026	9606.ENSP00000013125,9606.ENSP00000056217,9606.ENSP00000157600,9606.ENSP00000212015,9606.ENSP00000215631,9606.ENSP00000216037,9606.ENSP00000216373,9606.ENSP00000220751,9606.ENSP00000230990,9606.ENSP00000244869,9606.ENSP00000246229,9606.ENSP00000248244,9606.ENSP00000249075,9606.ENSP00000251849,9606.ENSP00000252809,9606.ENSP00000256458,9606.ENSP00000259808,9606.ENSP00000260130,9606.ENSP00000260356,…	MAP4K5,ARHGEF5,LMCD1,SIRT1,GADD45B,XBP1,SOS2,RIPK2,HBEGF,EREG,PLAGL2,TICAM1,LIF,RAF1,GDF15,IRAK2,RIPK1,SDCBP,THBS1,SEMA7A,TRAF4,C19orf10,MAP3K8,BRD4,BIRC3,MAP4K3,SLC9A1,CBL,MUL1,ALS2,RAPGEF2,DNAJC27,ICAM1,MAP3K13,GOLPH3,NRP1,GAREM,TNFRSF10B,PAK1,FBXW7,FLT1,SH3RF1,FLCN,BRAF,FGF19,REL,TGFA,F2RL1,TERF2IP,CRK,FADD,IL12A,ADORA2B,PRKCE,CLCF1,ZNF622,PPARD,CFLAR,SPHK1,CLU,DVL3,PIBF1,MALT1,CALR,LURAP1L,KA…
GO:0012501	programmed cell death	141	1042	0.17	0.00027	9606.ENSP00000064780,9606.ENSP00000164227,9606.ENSP00000179259,9606.ENSP00000200453,9606.ENSP00000202556,9606.ENSP00000212015,9606.ENSP00000215631,9606.ENSP00000216037,9606.ENSP00000216117,9606.ENSP00000216797,9606.ENSP00000220751,9606.ENSP00000225174,9606.ENSP00000226574,9606.ENSP00000228515,9606.ENSP00000229416,9606.ENSP00000231668,9606.ENSP00000234420,9606.ENSP00000238788,9606.ENSP00000242057,…	RELT,BCL3,C12orf5,PPP1R15A,PPP1R13B,SIRT1,GADD45B,XBP1,HMOX1,NFKBIA,RIPK2,PPIF,NFKB1,CSRNP2,GCLC,BNIP1,MSH6,TMEM214,AHR,IRF1,TNFSF9,PLAGL2,TICAM1,EGLN3,MKNK2,RAF1,RRP8,RIPK1,IER3,BCL2L10,TRAF4,ACIN1,C19orf10,IL1A,BIRC3,MUL1,LEF1,PHLDA1,MEF2D,RHOB,CSRNP1,EAF2,DLC1,TNFRSF10B,PAK1,SLC25A4,SH3RF1,SHISA5,FADD,IL12A,CEBPB,PRKCE,DDIT4,CYCS,ZNF622,TNFRSF10D,PPARD,CFLAR,DAB2,CLU,STK17A,SIAH2,HSPA5,PMAIP1,…
GO:0031669	cellular response to nutrient levels	42	206	0.35	0.00027	9606.ENSP00000212015,9606.ENSP00000215904,9606.ENSP00000216037,9606.ENSP00000216117,9606.ENSP00000253063,9606.ENSP00000254605,9606.ENSP00000256383,9606.ENSP00000262039,9606.ENSP00000264033,9606.ENSP00000264832,9606.ENSP00000265354,9606.ENSP00000266458,9606.ENSP00000276925,9606.ENSP00000297991,9606.ENSP00000298552,9606.ENSP00000299767,9606.ENSP00000304004,9606.ENSP00000306682,9606.ENSP00000307235,…	SIRT1,PDXP,XBP1,HMOX1,SESN2,RRP8,EIF2S1,PIK3C3,CBL,ICAM1,SRF,GABARAPL1,CDKN2B,AQP3,TSC1,HSP90B1,FOXA3,PPM1D,EIF2AK3,TBL2,SSH1,HSPA5,PMAIP1,UPP1,CAV1,MIOS,ATF3,P2RX4,MTOR,NUAK2,JUN,RRAGC,ZC3H12A,PIM1,NFE2L2,MTMR3,CDKN1A,ATP2B1,CADPS2,FNIP1,ZFYVE1,BHLHA15
GO:1901698	response to nitrogen compound	135	988	0.18	0.00027	9606.ENSP00000158771,9606.ENSP00000185150,9606.ENSP00000209728,9606.ENSP00000212015,9606.ENSP00000215904,9606.ENSP00000216037,9606.ENSP00000216797,9606.ENSP00000220592,9606.ENSP00000220751,9606.ENSP00000221566,9606.ENSP00000226574,9606.ENSP00000229416,9606.ENSP00000235382,9606.ENSP00000237455,9606.ENSP00000238738,9606.ENSP00000239223,9606.ENSP00000239938,9606.ENSP00000240874,9606.ENSP00000242057,…	DERL2,ERLEC1,CDC6,SIRT1,PDXP,XBP1,NFKBIA,AGO2,RIPK2,SGTA,NFKB1,GCLC,RGS2,RNF103,RHOQ,DUSP1,EGR1,KALRN,AHR,EGR2,EREG,INSIG2,FOSB,TICAM1,SDF2L1,DNAJB9,JUND,SESN2,JAG1,BTG1,EDEM1,KIAA0368,FAF2,PIK3C3,UFD1L,ZNF106,SLC9A1,MUL1,RAPGEF2,ICAM1,GAL,GET4,EIF2B2,NPC1,PAK1,QDPR,BTG2,STAT5B,SNIP1,TSC1,HSP90B1,CRK,FADD,JUNB,RNF139,CEBPB,PRKCE,FOS,SLC25A33,YWHAG,PDE12,FOSL1,CFLAR,PER1,SSH1,HMGCS1,HSPA5,PPP2R2A,…
GO:0032103	positive regulation of response to external stimulus	79	499	0.24	0.00028	9606.ENSP00000216797,9606.ENSP00000220751,9606.ENSP00000221452,9606.ENSP00000223095,9606.ENSP00000226574,9606.ENSP00000228606,9606.ENSP00000229332,9606.ENSP00000244869,9606.ENSP00000245907,9606.ENSP00000248244,9606.ENSP00000251849,9606.ENSP00000256458,9606.ENSP00000259808,9606.ENSP00000260356,9606.ENSP00000262039,9606.ENSP00000262510,9606.ENSP00000262640,9606.ENSP00000265371,9606.ENSP00000278568,…	NFKBIA,RIPK2,RELB,SERPINE1,NFKB1,CYP27B1,CLEC4A,EREG,C3,TICAM1,RAF1,IRAK2,RIPK1,THBS1,PIK3C3,NLRC5,VAMP7,NRP1,PAK1,OTULIN,STAT5B,CXCL3,CXCL5,F2RL1,HSP90B1,FADD,IL12A,ADORA2B,PRKCE,CXCL8,ADAM17,SWAP70,STX4,MALT1,CALR,KARS,CSF1,PDGFB,SMAD3,NDEL1,POLR3C,STX3,CAV1,RIOK3,CREB3,PSPC1,ANKRD17,PELI1,P2RX4,MAPKAPK2,IL6R,CHUK,BCL10,HSPA1B,HLA-E,OPTN,EDN1,DDX58,TRIM5,RSAD2,ETS1,AP1G1,CXCL1,POLR3D,RELA,TLR6,…
GO:0061136	regulation of proteasomal protein catabolic process	39	185	0.37	0.00028	9606.ENSP00000158771,9606.ENSP00000171111,9606.ENSP00000185150,9606.ENSP00000216037,9606.ENSP00000221566,9606.ENSP00000229416,9606.ENSP00000256497,9606.ENSP00000260130,9606.ENSP00000262384,9606.ENSP00000274289,9606.ENSP00000281708,9606.ENSP00000287437,9606.ENSP00000312150,9606.ENSP00000313391,9606.ENSP00000314619,9606.ENSP00000315130,9606.ENSP00000316512,9606.ENSP00000321239,9606.ENSP00000326095,…	DERL2,KEAP1,ERLEC1,XBP1,SGTA,GCLC,EDEM1,SDCBP,N4BP1,PLK2,FBXW7,NSMCE2,TRIB1,DAB2,ZFAND2A,CLU,TLK2,RCHY1,RNF166,YOD1,DNAJB2,CAV1,WAC,VCP,DDA1,BTRC,LONRF3,PLK3,RNF19B,TAF9,CSNK1E,NFE2L2,LONRF1,TMF1,USP25,HERPUD1,RYBP,SH3RF2,UBE2J1
GO:0036503	ERAD pathway	24	85	0.49	0.00029	9606.ENSP00000158771,9606.ENSP00000185150,9606.ENSP00000221566,9606.ENSP00000237455,9606.ENSP00000248958,9606.ENSP00000249356,9606.ENSP00000256497,9606.ENSP00000259335,9606.ENSP00000261942,9606.ENSP00000263202,9606.ENSP00000265857,9606.ENSP00000299767,9606.ENSP00000304051,9606.ENSP00000324173,9606.ENSP00000326813,9606.ENSP00000331487,9606.ENSP00000338019,9606.ENSP00000351777,9606.ENSP00000366395,…	DERL2,ERLEC1,SGTA,RNF103,SDF2L1,DNAJB9,EDEM1,KIAA0368,FAF2,UFD1L,GET4,HSP90B1,RNF139,HSPA5,YOD1,NPLOC4,DNAJB2,VCP,SYVN1,HM13,VIMP,UBE2J2,HERPUD1,UBE2J1
GO:0038061	NIK/NF-kappaB signaling	15	35	0.67	0.00029	9606.ENSP00000221452,9606.ENSP00000226574,9606.ENSP00000262395,9606.ENSP00000263464,9606.ENSP00000276431,9606.ENSP00000279387,9606.ENSP00000295025,9606.ENSP00000319279,9606.ENSP00000358983,9606.ENSP00000359206,9606.ENSP00000359424,9606.ENSP00000389600,9606.ENSP00000433623,9606.ENSP00000477613,9606.ENSP00000482657	RELB,NFKB1,TRAF4,BIRC3,TNFRSF10B,PPP4C,REL,MALT1,NFKB2,BTRC,CHUK,TLR6,TRAF6,BIRC2,MAP3K14
GO:0030522	intracellular receptor signaling pathway	37	173	0.37	0.00035	9606.ENSP00000216797,9606.ENSP00000220751,9606.ENSP00000242057,9606.ENSP00000246672,9606.ENSP00000251871,9606.ENSP00000254066,9606.ENSP00000256458,9606.ENSP00000261523,9606.ENSP00000262643,9606.ENSP00000265372,9606.ENSP00000284274,9606.ENSP00000310006,9606.ENSP00000310928,9606.ENSP00000314879,9606.ENSP00000320866,9606.ENSP00000344479,9606.ENSP00000345826,9606.ENSP00000361066,9606.ENSP00000362608,…	NFKBIA,RIPK2,AHR,NR1D1,MED17,RARA,IRAK2,RORA,CCNE1,CREM,OTULIN,NR1D2,PPARD,ALOXE3,CALR,NR4A2,PMEPA1,NCOA3,PIM1,DDX58,NKX3-1,MED13,RELA,KDM3A,FHL2,CYLD,NR6A1,RNF4,UBR5,TRAF6,NR4A1,UBC,CRY2,ITCH,TNFAIP3,NR4A3,IKBKG
GO:0045595	regulation of cell differentiation	210	1695	0.13	0.00035	9606.ENSP00000164133,9606.ENSP00000166139,9606.ENSP00000171111,9606.ENSP00000198767,9606.ENSP00000212015,9606.ENSP00000216037,9606.ENSP00000216797,9606.ENSP00000220751,9606.ENSP00000223095,9606.ENSP00000224140,9606.ENSP00000226574,9606.ENSP00000228606,9606.ENSP00000234198,9606.ENSP00000235382,9606.ENSP00000236925,9606.ENSP00000240874,9606.ENSP00000244050,9606.ENSP00000244869,9606.ENSP00000245414,…	PPP2R5B,FSTL3,KEAP1,RRN3,SIRT1,XBP1,NFKBIA,RIPK2,SERPINE1,SETX,NFKB1,CYP27B1,DLX2,RGS2,CAMSAP2,KALRN,SNAI1,EREG,IRF1,TNFSF9,NR1D1,LIF,DLL4,RAF1,GDF15,JUND,NUMBL,RARA,H3F3B,JAG1,BTG1,TBX3,RIPK1,SDCBP,THBS1,RORA,MAPK6,SEMA7A,MMD,VAMP7,ACIN1,ACVR1,CCNT2,MUL1,RAPGEF2,LEF1,FSTL4,SRF,NRP1,GAL,JDP2,SIK1,PLK2,PAK1,CCRN4L,FBXW7,NIPBL,UBASH3B,TRIM11,SH3RF1,FLCN,ISL2,STAT5B,MITF,AQP3,TSC1,RUNX1,CRK,FADD,IL1…
GO:0045862	positive regulation of proteolysis	60	347	0.28	0.00035	9606.ENSP00000171111,9606.ENSP00000212015,9606.ENSP00000216037,9606.ENSP00000220751,9606.ENSP00000221566,9606.ENSP00000229416,9606.ENSP00000245907,9606.ENSP00000250457,9606.ENSP00000256497,9606.ENSP00000257787,9606.ENSP00000259808,9606.ENSP00000260442,9606.ENSP00000264198,9606.ENSP00000274289,9606.ENSP00000276297,9606.ENSP00000276431,9606.ENSP00000281708,9606.ENSP00000287437,9606.ENSP00000295992,…	KEAP1,SIRT1,XBP1,RIPK2,SGTA,GCLC,C3,EGLN3,EDEM1,AKIRIN2,RIPK1,BCL2L10,MUL1,PLK2,DLC1,TNFRSF10B,FBXW7,NSMCE2,PCOLCE2,FADD,RNF139,EIF2AK3,CYCS,TRIB1,CFLAR,DAB2,ZFAND2A,CLU,RCHY1,KARS,RNF166,PMAIP1,SMAD3,DNAJB2,CAV1,NRD1,VCP,SMURF1,CTGF,EFNA1,BTRC,BCL10,LONRF3,PLK3,ZC3H12A,RNF19B,MTCH1,BAK1,XDH,NKX3-1,SLC11A2,CSNK1E,NFE2L2,MBP,LONRF1,PSME4,DIABLO,CYR61,HERPUD1,BCL2L13
GO:0001934	positive regulation of protein phosphorylation	129	941	0.18	0.00037	9606.ENSP00000013125,9606.ENSP00000056217,9606.ENSP00000209728,9606.ENSP00000212015,9606.ENSP00000215631,9606.ENSP00000216037,9606.ENSP00000220325,9606.ENSP00000220751,9606.ENSP00000230990,9606.ENSP00000239938,9606.ENSP00000244869,9606.ENSP00000245907,9606.ENSP00000249075,9606.ENSP00000251849,9606.ENSP00000252809,9606.ENSP00000256458,9606.ENSP00000259808,9606.ENSP00000260130,9606.ENSP00000260356,…	MAP4K5,ARHGEF5,CDC6,SIRT1,GADD45B,XBP1,EHD4,RIPK2,HBEGF,EGR1,EREG,C3,LIF,RAF1,GDF15,IRAK2,RIPK1,SDCBP,THBS1,CCND2,SEMA7A,MMD,TRAF4,C19orf10,MAP3K8,ACVR1,MAP4K3,CCNT2,MUL1,ALS2,RAPGEF2,DNAJC27,ICAM1,MAP3K13,NRP1,MAPKAP1,GAREM,TNFRSF10B,PAK1,FBXW7,FLT1,SH3RF1,FLCN,PRKAG2,BRAF,ITGA5,FGF19,TGFA,CCNL1,SENP2,F2RL1,TERF2IP,CRK,IL12A,LRP8,ADORA2B,PRKCE,CLCF1,ADAM17,ZNF622,CFLAR,DAB2,SPHK1,CLU,DVL3,PIBF1,…
GO:0001944	vasculature development	77	487	0.24	0.00037	9606.ENSP00000212015,9606.ENSP00000216037,9606.ENSP00000216117,9606.ENSP00000223095,9606.ENSP00000237937,9606.ENSP00000239938,9606.ENSP00000242057,9606.ENSP00000244869,9606.ENSP00000249075,9606.ENSP00000249749,9606.ENSP00000254958,9606.ENSP00000257566,9606.ENSP00000260356,9606.ENSP00000261523,9606.ENSP00000262225,9606.ENSP00000262947,9606.ENSP00000263062,9606.ENSP00000263640,9606.ENSP00000264036,…	SIRT1,XBP1,HMOX1,SERPINE1,ZFAND5,EGR1,AHR,EREG,LIF,DLL4,JAG1,TBX3,THBS1,RORA,TMED2,C19orf10,EPC1,ACVR1,MCAM,RAPGEF2,LEF1,SRF,NRP1,RHOB,FBXW7,FLT1,OTULIN,ITGA5,DCTN5,ANGPTL4,JUNB,LUZP1,CXCL8,EIF2AK3,FOSL1,HEG1,SPHK1,EGR3,TNFRSF12A,SOCS3,PDGFB,ARID2,CAV1,PDGFA,NRARP,ADIPOR2,EPHA2,ANKRD17,PROX1,CTGF,EFNA1,NUS1,ECM1,PRDM1,RBM15,NSDHL,JUN,RAPGEF1,ZC3H12A,BAK1,ERRFI1,SHB,EDN1,NKX3-1,ETS1,SETD2,C1GALT1,…
GO:0009605	response to external stimulus	257	2152	0.12	0.00037	9606.ENSP00000056217,9606.ENSP00000064780,9606.ENSP00000164024,9606.ENSP00000164227,9606.ENSP00000212015,9606.ENSP00000215904,9606.ENSP00000216037,9606.ENSP00000216117,9606.ENSP00000216489,9606.ENSP00000216629,9606.ENSP00000216797,9606.ENSP00000220751,9606.ENSP00000221452,9606.ENSP00000223095,9606.ENSP00000226574,9606.ENSP00000227752,9606.ENSP00000228606,9606.ENSP00000229332,9606.ENSP00000229416,…	ARHGEF5,RELT,CELSR3,BCL3,SIRT1,PDXP,XBP1,HMOX1,ALKBH1,BDKRB1,NFKBIA,RIPK2,RELB,SERPINE1,NFKB1,IL10RA,CYP27B1,CLEC4A,GCLC,GUCA1B,HBEGF,TUSC2,ODC1,EGR1,KALRN,EGR2,IRF1,C3,FOSB,NR1D1,TICAM1,RAF1,MICB,GDF15,JUND,SESN2,RARA,RRP8,EIF2S1,MBD2,IRAK2,BHLHE40,OASL,AKIRIN2,USP2,THBS1,LIPG,SEMA7A,PIK3C3,NLRC5,VAMP7,SLC9A1,CBL,ICAM1,LEF1,SRF,NRP1,GABARAPL1,AKAP8,SIK1,SLC22A3,TNFRSF10B,CDKN2B,CCRN4L,FLT1,OTULI…
GO:0071902	positive regulation of protein serine/threonine kinase activity	59	340	0.28	0.00037	9606.ENSP00000013125,9606.ENSP00000056217,9606.ENSP00000209728,9606.ENSP00000212015,9606.ENSP00000215631,9606.ENSP00000220751,9606.ENSP00000251849,9606.ENSP00000252809,9606.ENSP00000256458,9606.ENSP00000259808,9606.ENSP00000260356,9606.ENSP00000261254,9606.ENSP00000263056,9606.ENSP00000263881,9606.ENSP00000264157,9606.ENSP00000264198,9606.ENSP00000264276,9606.ENSP00000264431,9606.ENSP00000265026,…	MAP4K5,ARHGEF5,CDC6,SIRT1,GADD45B,RIPK2,RAF1,GDF15,IRAK2,RIPK1,THBS1,CCND2,MAP3K8,MAP4K3,CCNT2,MUL1,ALS2,RAPGEF2,MAP3K13,PAK1,FLT1,BRAF,TGFA,CCNL1,CRK,ADORA2B,ADAM17,DVL3,KARS,PDGFB,SPDYA,MAP2K3,PDGFA,AKAP13,PROX1,MAPKAPK2,PEA15,DUSP5,AVPI1,GADD45A,PTPN1,RAPGEF1,PIM1,DKK1,SPRY2,BMP2,RGCC,EDN1,TLR6,SHC1,MAP2K4,MUC20,PPP2CA,CSB-PGBD3,TRAF6,UBC,MAP3K9,MAP3K14,IKBKG
GO:0072358	cardiovascular system development	78	496	0.24	0.00038	9606.ENSP00000212015,9606.ENSP00000216037,9606.ENSP00000216117,9606.ENSP00000223095,9606.ENSP00000237937,9606.ENSP00000239938,9606.ENSP00000242057,9606.ENSP00000244869,9606.ENSP00000249075,9606.ENSP00000249749,9606.ENSP00000254958,9606.ENSP00000257566,9606.ENSP00000260356,9606.ENSP00000261523,9606.ENSP00000262225,9606.ENSP00000262947,9606.ENSP00000263062,9606.ENSP00000263640,9606.ENSP00000264036,…	SIRT1,XBP1,HMOX1,SERPINE1,ZFAND5,EGR1,AHR,EREG,LIF,DLL4,JAG1,TBX3,THBS1,RORA,TMED2,C19orf10,EPC1,ACVR1,MCAM,RAPGEF2,LEF1,SRF,NRP1,RHOB,FBXW7,FLT1,OTULIN,ITGA5,DCTN5,ANGPTL4,JUNB,LUZP1,CXCL8,EIF2AK3,FOSL1,HEG1,SPHK1,EGR3,TNFRSF12A,SOCS3,PDGFB,ARID2,CAV1,PDGFA,NRARP,ADIPOR2,EPHA2,ANKRD17,PROX1,CTGF,EFNA1,NUS1,ECM1,PRDM1,RBM15,NSDHL,JUN,RAPGEF1,ZC3H12A,BAK1,ERRFI1,SHB,KDM6A,EDN1,NKX3-1,ETS1,SETD2,C1…
GO:0031347	regulation of defense response	99	676	0.21	0.00039	9606.ENSP00000216797,9606.ENSP00000220751,9606.ENSP00000221452,9606.ENSP00000223095,9606.ENSP00000226574,9606.ENSP00000229332,9606.ENSP00000244869,9606.ENSP00000245414,9606.ENSP00000245907,9606.ENSP00000246672,9606.ENSP00000248244,9606.ENSP00000251849,9606.ENSP00000252229,9606.ENSP00000256458,9606.ENSP00000257604,9606.ENSP00000259808,9606.ENSP00000261523,9606.ENSP00000261918,9606.ENSP00000262039,…	NFKBIA,RIPK2,RELB,SERPINE1,NFKB1,CLEC4A,EREG,IRF1,C3,NR1D1,TICAM1,RAF1,MICB,IRAK2,TRAFD1,RIPK1,RORA,SEMA7A,PIK3C3,NLRC5,VAMP7,UFD1L,BRD4,BIRC3,MUL1,FEM1A,PAK1,PPM1B,OTULIN,IFNGR2,STAT5B,F2RL1,HSP90B1,CRK,FADD,IL12A,ADORA2B,PRKCE,NR1D2,PPARD,PER1,CLU,METRNL,MALT1,KARS,IFNLR1,SOCS3,NPLOC4,SMAD3,POLR3C,CAV1,RIOK3,CREB3,MCPH1,PSPC1,TRIM38,ANKRD17,PELI1,GPATCH3,SBNO2,DUSP10,MAPKAPK2,CHUK,BCL10,PTPN1,Z…
GO:0043408	regulation of MAPK cascade	103	712	0.2	0.00041	9606.ENSP00000013125,9606.ENSP00000056217,9606.ENSP00000215631,9606.ENSP00000216037,9606.ENSP00000220751,9606.ENSP00000235382,9606.ENSP00000239223,9606.ENSP00000240100,9606.ENSP00000249075,9606.ENSP00000251849,9606.ENSP00000252809,9606.ENSP00000256458,9606.ENSP00000259808,9606.ENSP00000260130,9606.ENSP00000260356,9606.ENSP00000261918,9606.ENSP00000262395,9606.ENSP00000262947,9606.ENSP00000263056,…	MAP4K5,ARHGEF5,GADD45B,XBP1,RIPK2,RGS2,DUSP1,DUSP4,LIF,RAF1,GDF15,IRAK2,RIPK1,SDCBP,THBS1,SEMA7A,TRAF4,C19orf10,MAP3K8,MAP4K3,MUL1,RAPGEF2,DNAJC27,ICAM1,MAP3K13,NRP1,GAREM,PAK1,FBXW7,FLT1,PTPRR,SH3RF1,FLCN,BRAF,DUSP2,FGF19,TGFA,F2RL1,DUSP16,CRK,ADORA2B,PRKCE,ZNF622,TRIB1,CFLAR,PER1,DVL3,HSPH1,PRMT5,KARS,PDGFB,CAV1,RNF41,ATF3,MAP2K3,PDGFA,EPHA2,AKAP13,DUSP10,MAPKAPK2,CTGF,PEA15,EFNA1,IL6R,EIF3A,DU…
GO:0045597	positive regulation of cell differentiation	125	908	0.18	0.00041	9606.ENSP00000164133,9606.ENSP00000198767,9606.ENSP00000212015,9606.ENSP00000216037,9606.ENSP00000220751,9606.ENSP00000223095,9606.ENSP00000224140,9606.ENSP00000226574,9606.ENSP00000228606,9606.ENSP00000234198,9606.ENSP00000235382,9606.ENSP00000240874,9606.ENSP00000244050,9606.ENSP00000245817,9606.ENSP00000249075,9606.ENSP00000252809,9606.ENSP00000252818,9606.ENSP00000252891,9606.ENSP00000254066,…	PPP2R5B,RRN3,SIRT1,XBP1,RIPK2,SERPINE1,SETX,NFKB1,CYP27B1,DLX2,RGS2,KALRN,SNAI1,TNFSF9,LIF,GDF15,JUND,NUMBL,RARA,JAG1,BTG1,RIPK1,SDCBP,MAPK6,SEMA7A,MMD,VAMP7,ACIN1,ACVR1,MUL1,RAPGEF2,LEF1,SRF,NRP1,PAK1,CCRN4L,NIPBL,STAT5B,RUNX1,CRK,FADD,IL12A,JUNB,LRP8,CEBPB,FOS,CLCF1,PPARD,TRIB1,CFLAR,DAB2,METRNL,DVL3,ZNF609,EGR3,PRMT5,MALT1,CALR,HSPA5,ZNF335,NFKBIZ,TNFRSF12A,CSF1,SOCS3,SMAD3,NDEL1,SFN,NET1,GOLG…
GO:0051094	positive regulation of developmental process	166	1286	0.15	0.00043	9606.ENSP00000164133,9606.ENSP00000198767,9606.ENSP00000212015,9606.ENSP00000216037,9606.ENSP00000216117,9606.ENSP00000220592,9606.ENSP00000220751,9606.ENSP00000223095,9606.ENSP00000224140,9606.ENSP00000226574,9606.ENSP00000228606,9606.ENSP00000234198,9606.ENSP00000234420,9606.ENSP00000235382,9606.ENSP00000239938,9606.ENSP00000240874,9606.ENSP00000244050,9606.ENSP00000245817,9606.ENSP00000245907,…	PPP2R5B,RRN3,SIRT1,XBP1,HMOX1,AGO2,RIPK2,SERPINE1,SETX,NFKB1,CYP27B1,DLX2,MSH6,RGS2,EGR1,KALRN,SNAI1,TNFSF9,C3,LIF,GDF15,JUND,NUMBL,RARA,JAG1,BTG1,RIPK1,SDCBP,THBS1,LHX5,MAPK6,SEMA7A,MMD,VAMP7,ACIN1,C19orf10,IL1A,ACVR1,MUL1,RAPGEF2,LEF1,SRF,NRP1,GAL,CLSTN3,RHOB,PLK2,PAK1,CCRN4L,FLT1,NIPBL,STAT5B,ITGA5,RUNX1,CRK,ANGPTL4,FADD,IL12A,JUNB,LRP8,CEBPB,FOS,CXCL8,CLCF1,PPARD,TRIB1,CFLAR,DAB2,SPHK1,METRNL…
GO:0032527	protein exit from endoplasmic reticulum	11	19	0.8	0.00052	9606.ENSP00000158771,9606.ENSP00000260643,9606.ENSP00000261942,9606.ENSP00000263202,9606.ENSP00000299767,9606.ENSP00000331487,9606.ENSP00000351777,9606.ENSP00000366395,9606.ENSP00000381237,9606.ENSP00000381282,9606.ENSP00000409555	DERL2,PREB,FAF2,UFD1L,HSP90B1,NPLOC4,VCP,SYVN1,HM13,VIMP,HERPUD1
GO:0043405	regulation of MAP kinase activity	58	337	0.28	0.00052	9606.ENSP00000013125,9606.ENSP00000056217,9606.ENSP00000215631,9606.ENSP00000220751,9606.ENSP00000235382,9606.ENSP00000239223,9606.ENSP00000240100,9606.ENSP00000251849,9606.ENSP00000252809,9606.ENSP00000256458,9606.ENSP00000259808,9606.ENSP00000260356,9606.ENSP00000263056,9606.ENSP00000263881,9606.ENSP00000264198,9606.ENSP00000265026,9606.ENSP00000278568,9606.ENSP00000282397,9606.ENSP00000288602,…	MAP4K5,ARHGEF5,GADD45B,RIPK2,RGS2,DUSP1,DUSP4,RAF1,GDF15,IRAK2,RIPK1,THBS1,MAP3K8,MAP4K3,MUL1,MAP3K13,PAK1,FLT1,BRAF,DUSP2,TGFA,DUSP16,CRK,ADORA2B,TRIB1,DVL3,KARS,PDGFB,CAV1,MAP2K3,PDGFA,AKAP13,DUSP10,MAPKAPK2,PEA15,DUSP5,AVPI1,GADD45A,PTPN1,RAPGEF1,DKK1,SPRY2,BMP2,EDN1,GPS2,DUSP8,TLR6,CDK12,SHC1,MAP2K4,MUC20,PPP2CA,CSB-PGBD3,TRAF6,UBC,MAP3K9,MAP3K14,IKBKG
GO:0070482	response to oxygen levels	56	321	0.28	0.00052	9606.ENSP00000179259,9606.ENSP00000212015,9606.ENSP00000216117,9606.ENSP00000239938,9606.ENSP00000250457,9606.ENSP00000251849,9606.ENSP00000260356,9606.ENSP00000261523,9606.ENSP00000263980,9606.ENSP00000264033,9606.ENSP00000264832,9606.ENSP00000265354,9606.ENSP00000278568,9606.ENSP00000292114,9606.ENSP00000297991,9606.ENSP00000298552,9606.ENSP00000299767,9606.ENSP00000301455,9606.ENSP00000306124,…	C12orf5,SIRT1,HMOX1,EGR1,EGLN3,RAF1,THBS1,RORA,SLC9A1,CBL,ICAM1,SRF,PAK1,TMEM199,AQP3,TSC1,HSP90B1,ANGPTL4,PRKCE,TBL2,DDIT4,ADAM17,PPARD,CFLAR,PMAIP1,P4HB,SMAD3,CAV1,NR4A2,MTOR,CTGF,CYB5R4,ANKRD1,PLK3,PLAU,BMP2,RGCC,EDN1,NKX3-1,ETS1,SLC11A2,NFE2L2,ALKBH5,BACH1,CDKN1A,HIPK2,FOXO3,CREB1,SCFD1,CRYAB,ADM,UBC,CPEB2,CITED2,WTIP,BIRC2
GO:0043902	positive regulation of multi-organism process	65	394	0.26	0.00053	9606.ENSP00000216797,9606.ENSP00000217402,9606.ENSP00000220592,9606.ENSP00000220751,9606.ENSP00000221452,9606.ENSP00000226574,9606.ENSP00000229332,9606.ENSP00000244869,9606.ENSP00000248244,9606.ENSP00000251849,9606.ENSP00000256458,9606.ENSP00000259808,9606.ENSP00000262039,9606.ENSP00000262510,9606.ENSP00000263847,9606.ENSP00000265165,9606.ENSP00000267202,9606.ENSP00000278568,9606.ENSP00000284274,…	NFKBIA,CHMP4B,AGO2,RIPK2,RELB,NFKB1,CLEC4A,EREG,TICAM1,RAF1,IRAK2,RIPK1,PIK3C3,NLRC5,OSBP,LEF1,VPS37B,PAK1,OTULIN,TRIM11,STAT5B,F2RL1,HSP90B1,FADD,IL12A,PRKCE,PDE12,MALT1,P4HB,POLR3C,RRP1B,CAV1,RIOK3,PSPC1,TBC1D20,TRIM38,ANKRD17,PELI1,ADARB1,MAPKAPK2,CHUK,BCL10,JUN,HSPA1B,HLA-E,OPTN,DDX58,TRIM5,LHFPL2,RSAD2,AP1G1,POLR3D,RELA,TLR6,CYLD,PVR,MUC20,MUC4,TRAF6,UBC,TRAF3,RPS6KA5,ITCH,TNFAIP3,IKBKG
GO:0031396	regulation of protein ubiquitination	39	192	0.35	0.00054	9606.ENSP00000220751,9606.ENSP00000229416,9606.ENSP00000248244,9606.ENSP00000260247,9606.ENSP00000262384,9606.ENSP00000263464,9606.ENSP00000265138,9606.ENSP00000268042,9606.ENSP00000269856,9606.ENSP00000281708,9606.ENSP00000296257,9606.ENSP00000304051,9606.ENSP00000306124,9606.ENSP00000313681,9606.ENSP00000318966,9606.ENSP00000319279,9606.ENSP00000319482,9606.ENSP00000321239,9606.ENSP00000322457,…	RIPK2,GCLC,TICAM1,DCUN1D5,N4BP1,BIRC3,ARRDC3,ARRDC4,FEM1A,FBXW7,SENP2,RNF139,PRKCE,SPHK1,PINX1,MALT1,DCUN1D3,RCHY1,SIAH2,HSPA5,HSP90AA1,DNAJB2,CAV1,RASSF1,PELI1,TOPORS,MTOR,CTR9,BCL10,HSPA1B,GPS2,PLAA,HERPUD1,DCUN1D2,UBR5,TRAF6,RNF111,BIRC2,TNFAIP3
GO:0036293	response to decreased oxygen levels	53	298	0.29	0.00054	9606.ENSP00000179259,9606.ENSP00000212015,9606.ENSP00000216117,9606.ENSP00000239938,9606.ENSP00000250457,9606.ENSP00000251849,9606.ENSP00000260356,9606.ENSP00000261523,9606.ENSP00000263980,9606.ENSP00000264033,9606.ENSP00000264832,9606.ENSP00000265354,9606.ENSP00000278568,9606.ENSP00000297991,9606.ENSP00000298552,9606.ENSP00000299767,9606.ENSP00000301455,9606.ENSP00000306124,9606.ENSP00000307260,…	C12orf5,SIRT1,HMOX1,EGR1,EGLN3,RAF1,THBS1,RORA,SLC9A1,CBL,ICAM1,SRF,PAK1,AQP3,TSC1,HSP90B1,ANGPTL4,PRKCE,TBL2,DDIT4,ADAM17,PPARD,CFLAR,PMAIP1,P4HB,SMAD3,CAV1,NR4A2,MTOR,CTGF,ANKRD1,PLK3,PLAU,BMP2,RGCC,EDN1,NKX3-1,ETS1,SLC11A2,NFE2L2,ALKBH5,BACH1,HIPK2,FOXO3,CREB1,SCFD1,CRYAB,ADM,UBC,CPEB2,CITED2,WTIP,BIRC2
GO:0016032	viral process	86	571	0.22	0.00056	9606.ENSP00000212015,9606.ENSP00000216797,9606.ENSP00000217402,9606.ENSP00000220509,9606.ENSP00000221566,9606.ENSP00000227520,9606.ENSP00000234420,9606.ENSP00000248248,9606.ENSP00000252229,9606.ENSP00000259808,9606.ENSP00000262213,9606.ENSP00000263377,9606.ENSP00000264157,9606.ENSP00000264832,9606.ENSP00000267202,9606.ENSP00000268184,9606.ENSP00000269228,9606.ENSP00000273047,9606.ENSP00000273130,…	SIRT1,NFKBIA,CHMP4B,VPS18,SGTA,CCDC86,MSH6,MON1B,MICB,RIPK1,TRAM1,BRD4,CCNT2,ICAM1,VPS37B,CRTC3,NPC1,RAB5A,DYNC1LI1,SLC25A4,FBXW7,GTF2E1,ITGA5,UBAP1,KCTD5,VPS37C,FADD,CFLAR,NUP98,VPS37A,SUPT6H,MMP1,KARS,KPNA7,SMAD3,CAV1,SLC20A2,CREB3,NUP50,TBC1D20,TAP1,SND1,UVRAG,EPHA2,ANKRD17,VCP,NUP214,RAET1L,F11R,EIF3A,RBM15,GBF1,BTRC,ZC3H12A,UBR4,HSPA1B,SPEN,NMT2,NFX1,DDX58,TRIM5,GPS2,ITSN1,RSAD2,ATG16L1,AP1G…
GO:0071345	cellular response to cytokine stimulus	129	953	0.17	0.00058	9606.ENSP00000064780,9606.ENSP00000171111,9606.ENSP00000212015,9606.ENSP00000216037,9606.ENSP00000216117,9606.ENSP00000216797,9606.ENSP00000220751,9606.ENSP00000226574,9606.ENSP00000227752,9606.ENSP00000239938,9606.ENSP00000244869,9606.ENSP00000245414,9606.ENSP00000245817,9606.ENSP00000249075,9606.ENSP00000252891,9606.ENSP00000256458,9606.ENSP00000257570,9606.ENSP00000259808,9606.ENSP00000260356,…	RELT,KEAP1,SIRT1,XBP1,HMOX1,NFKBIA,RIPK2,NFKB1,IL10RA,EGR1,EREG,IRF1,TNFSF9,LIF,NUMBL,IRAK2,OASL,RIPK1,THBS1,RORA,MAP3K8,IL1A,BIRC3,CBL,ICAM1,LEF1,TNFRSF10B,IFNGR2,STAT5B,PCOLCE2,CXCL3,CXCL5,NFIL3,HSP90B1,CRK,IL12A,JUNB,LRP8,CEBPB,B3GNT2,FOS,CXCL8,ISG20,PDE12,CLCF1,ADAM17,TNFRSF10D,TOLLIP,STX4,MMP1,HSPA5,KARS,TNFRSF12A,CSF1,P4HB,IFNLR1,SOCS3,PDGFB,RAB12,SMAD3,MX2,HSP90AA1,STX3,JARID2,OCLN,TRIM38,…
GO:0050793	regulation of developmental process	282	2416	0.11	0.00059	9606.ENSP00000164024,9606.ENSP00000164133,9606.ENSP00000166139,9606.ENSP00000171111,9606.ENSP00000198767,9606.ENSP00000212015,9606.ENSP00000216037,9606.ENSP00000216117,9606.ENSP00000216797,9606.ENSP00000220592,9606.ENSP00000220751,9606.ENSP00000223095,9606.ENSP00000224140,9606.ENSP00000226574,9606.ENSP00000228606,9606.ENSP00000234198,9606.ENSP00000234420,9606.ENSP00000235382,9606.ENSP00000236925,…	CELSR3,PPP2R5B,FSTL3,KEAP1,RRN3,SIRT1,XBP1,HMOX1,NFKBIA,AGO2,RIPK2,SERPINE1,SETX,NFKB1,CYP27B1,DLX2,MSH6,RGS2,CAMSAP2,RHOQ,EGR1,KALRN,SNAI1,EREG,IRF1,TNFSF9,C3,NR1D1,LIF,DLL4,RAF1,GDF15,JUND,NUMBL,RARA,H3F3B,JAG1,BTG1,TBX3,RIPK1,SDCBP,THBS1,RORA,LHX5,MAPK6,SEMA7A,MMD,VAMP7,ACIN1,C19orf10,IL1A,ACVR1,CCNT2,MUL1,RAPGEF2,ICAM1,LEF1,FSTL4,SRF,NRP1,GAL,CLSTN3,JDP2,SIK1,RHOB,EAF2,PLK2,DLC1,PAK1,CCRN4L,F…
GO:0050896	response to stimulus	800	7824	0.05	0.00066	9606.ENSP00000013125,9606.ENSP00000014914,9606.ENSP00000033079,9606.ENSP00000040738,9606.ENSP00000056217,9606.ENSP00000064780,9606.ENSP00000075120,9606.ENSP00000158771,9606.ENSP00000164024,9606.ENSP00000164133,9606.ENSP00000164227,9606.ENSP00000166139,9606.ENSP00000171111,9606.ENSP00000179259,9606.ENSP00000185150,9606.ENSP00000200453,9606.ENSP00000202556,9606.ENSP00000209728,9606.ENSP00000212015,…	MAP4K5,GPRC5A,FAM13B,BOD1L1,ARHGEF5,RELT,SLC2A3,DERL2,CELSR3,PPP2R5B,BCL3,FSTL3,KEAP1,C12orf5,ERLEC1,PPP1R15A,PPP1R13B,CDC6,SIRT1,GADD45B,PDXP,XBP1,HMOX1,BRD1,SOS2,ALKBH1,BDKRB1,NFKBIA,GLA,PSMD7,EHD4,RHOV,AGO2,BRF2,RIPK2,GSR,RELB,SGTA,NAMPT,FKBP14,SERPINE1,SETX,PPIF,RASD1,AKAP10,NFKB1,IL10RA,PRDM4,CYP27B1,CLEC4A,RAB35,FGFR1OP2,GCLC,GUCA1B,HBEGF,TUSC2,ODC1,SLC1A4,MSH6,RGS2,SLC19A2,RNF103,ABCG2,STB…
GO:2000058	regulation of ubiquitin-dependent protein catabolic process	34	158	0.37	0.00066	9606.ENSP00000171111,9606.ENSP00000216037,9606.ENSP00000221566,9606.ENSP00000229416,9606.ENSP00000260130,9606.ENSP00000262384,9606.ENSP00000274289,9606.ENSP00000281708,9606.ENSP00000287437,9606.ENSP00000304051,9606.ENSP00000312150,9606.ENSP00000313391,9606.ENSP00000314619,9606.ENSP00000315130,9606.ENSP00000316512,9606.ENSP00000321239,9606.ENSP00000326095,9606.ENSP00000338019,9606.ENSP00000339191,…	KEAP1,XBP1,SGTA,GCLC,SDCBP,N4BP1,PLK2,FBXW7,NSMCE2,RNF139,TRIB1,DAB2,ZFAND2A,CLU,TLK2,RCHY1,RNF166,DNAJB2,CAV1,WAC,VCP,DDA1,SMURF1,LONRF3,PLK3,RNF19B,TRIM39,TAF9,CSNK1E,NFE2L2,LONRF1,HIPK2,HERPUD1,RYBP
GO:2001236	regulation of extrinsic apoptotic signaling pathway	34	158	0.37	0.00066	9606.ENSP00000216117,9606.ENSP00000223095,9606.ENSP00000229416,9606.ENSP00000251849,9606.ENSP00000259808,9606.ENSP00000260356,9606.ENSP00000263339,9606.ENSP00000263640,9606.ENSP00000264832,9606.ENSP00000265371,9606.ENSP00000276431,9606.ENSP00000284637,9606.ENSP00000301838,9606.ENSP00000312455,9606.ENSP00000317714,9606.ENSP00000322457,9606.ENSP00000326119,9606.ENSP00000326737,9606.ENSP00000339191,…	HMOX1,SERPINE1,GCLC,RAF1,RIPK1,THBS1,IL1A,ACVR1,ICAM1,NRP1,TNFRSF10B,SH3RF1,FADD,CFLAR,STX4,SIAH2,PMAIP1,TNFRSF12A,CAV1,ATF3,PEA15,MCL1,GCLM,BCL10,EYA3,HSPA1B,SGK3,RELA,CYLD,BIRC6,SKIL,DAPK3,DEDD2,TNFAIP3
GO:0010647	positive regulation of cell communication	201	1631	0.13	0.00067	9606.ENSP00000013125,9606.ENSP00000056217,9606.ENSP00000157600,9606.ENSP00000164133,9606.ENSP00000202556,9606.ENSP00000212015,9606.ENSP00000215631,9606.ENSP00000216037,9606.ENSP00000216373,9606.ENSP00000220751,9606.ENSP00000225174,9606.ENSP00000226574,9606.ENSP00000228606,9606.ENSP00000230990,9606.ENSP00000240874,9606.ENSP00000244869,9606.ENSP00000245907,9606.ENSP00000246229,9606.ENSP00000248244,…	MAP4K5,ARHGEF5,LMCD1,PPP2R5B,PPP1R13B,SIRT1,GADD45B,XBP1,SOS2,RIPK2,PPIF,NFKB1,CYP27B1,HBEGF,KALRN,EREG,C3,PLAGL2,TICAM1,LIF,DLL4,RAF1,GDF15,JAG1,MBD2,IRAK2,RIPK1,SDCBP,THBS1,SEMA7A,TRAF4,NLRC5,VAMP7,C19orf10,MAP3K8,BRD4,BIRC3,ACVR1,MAP4K3,SLC9A1,CBL,MUL1,ALS2,RAPGEF2,DNAJC27,ICAM1,MAP3K13,GOLPH3,NRP1,GAL,CLSTN3,GAREM,PLK2,PELO,TNFRSF10B,CDKN2B,PAK1,FBXW7,FLT1,SH3RF1,FLCN,BRAF,ITGA5,FGF19,REL,TGF…
GO:0001819	positive regulation of cytokine production	64	390	0.26	0.00068	9606.ENSP00000164227,9606.ENSP00000216037,9606.ENSP00000216117,9606.ENSP00000220751,9606.ENSP00000223095,9606.ENSP00000226574,9606.ENSP00000232496,9606.ENSP00000239938,9606.ENSP00000244869,9606.ENSP00000245414,9606.ENSP00000245907,9606.ENSP00000248244,9606.ENSP00000254066,9606.ENSP00000257787,9606.ENSP00000259808,9606.ENSP00000260356,9606.ENSP00000261523,9606.ENSP00000261918,9606.ENSP00000263339,…	BCL3,XBP1,HMOX1,RIPK2,SERPINE1,NFKB1,TUSC2,EGR1,EREG,IRF1,C3,TICAM1,RARA,AKIRIN2,RIPK1,THBS1,RORA,SEMA7A,IL1A,STAT5B,F2RL1,RUNX1,FADD,IL12A,ADORA2B,CEBPB,EIF2AK3,ADAM17,HEG1,CLU,PIBF1,MALT1,KARS,PDE4B,SMAD3,POLR3C,RIOK3,ANKRD17,PELI1,MAPKAPK2,IL6R,NFKB2,CHUK,BCL10,POLR3A,HSPA1B,HLA-E,CD83,RGCC,DDX58,CD274,RSAD2,IL4R,POLR3D,MBP,TMF1,RELA,SETD2,CREB1,TLR6,TRAF6,DDIT3,TRIM16,NR4A3
GO:0042127	regulation of cell population proliferation	197	1594	0.13	0.00069	9606.ENSP00000064780,9606.ENSP00000158771,9606.ENSP00000209728,9606.ENSP00000212015,9606.ENSP00000216037,9606.ENSP00000216117,9606.ENSP00000216797,9606.ENSP00000217121,9606.ENSP00000220751,9606.ENSP00000222553,9606.ENSP00000228606,9606.ENSP00000230990,9606.ENSP00000234111,9606.ENSP00000239223,9606.ENSP00000239938,9606.ENSP00000242057,9606.ENSP00000244869,9606.ENSP00000245414,9606.ENSP00000245817,…	RELT,DERL2,CDC6,SIRT1,XBP1,HMOX1,NFKBIA,TPD52L2,RIPK2,NAMPT,CYP27B1,HBEGF,ODC1,DUSP1,EGR1,AHR,EREG,IRF1,TNFSF9,NR1D1,TICAM1,LIF,DLL4,EGLN3,RAF1,JUND,RARA,JAG1,BTG1,MBD2,TBX3,AKIRIN2,SDCBP,THBS1,CCND2,LHX5,C19orf10,IL1A,RAPGEF2,FOSL2,LEF1,SRF,NRP1,GAL,GAREM,EMP3,MEF2D,FTH1,EAF2,DLC1,TNFRSF10B,CDKN2B,PAK1,FBXW7,FLT1,SH3RF1,FLCN,BTG2,STAT5B,FGF19,TGFA,MITF,CXCL3,CXCL5,TSC1,MVD,FADD,IL12A,JUNB,RNF139…
GO:0006914	autophagy	45	240	0.31	0.00071	9606.ENSP00000179259,9606.ENSP00000216037,9606.ENSP00000217402,9606.ENSP00000220509,9606.ENSP00000231668,9606.ENSP00000237642,9606.ENSP00000262039,9606.ENSP00000262139,9606.ENSP00000266458,9606.ENSP00000267202,9606.ENSP00000269221,9606.ENSP00000269228,9606.ENSP00000277746,9606.ENSP00000287878,9606.ENSP00000295888,9606.ENSP00000296343,9606.ENSP00000301765,9606.ENSP00000304376,9606.ENSP00000305892,…	C12orf5,XBP1,CHMP4B,VPS18,BNIP1,STBD1,PIK3C3,WIPI1,GABARAPL1,VPS37B,C18orf8,NPC1,NRBF2,PRKAG2,WDFY3,KIAA0226,VPS37C,RAB24,TMEM208,TOLLIP,CLU,VPS37A,YOD1,RAB12,HSP90AA1,ATG101,RNF41,UVRAG,VCP,SMURF1,ATG4A,C6orf106,TP53INP2,TBC1D25,STAM,OPTN,TRIM5,SQSTM1,ATG16L1,PLAA,MTMR3,PLEKHM1,ZFYVE1,CLTC,C9orf72
GO:0030970	retrograde protein transport, ER to cytosol	10	16	0.84	0.00073	9606.ENSP00000158771,9606.ENSP00000261942,9606.ENSP00000263202,9606.ENSP00000299767,9606.ENSP00000331487,9606.ENSP00000351777,9606.ENSP00000366395,9606.ENSP00000381237,9606.ENSP00000381282,9606.ENSP00000409555	DERL2,FAF2,UFD1L,HSP90B1,NPLOC4,VCP,SYVN1,HM13,VIMP,HERPUD1
GO:2001234	negative regulation of apoptotic signaling pathway	42	218	0.33	0.00075	9606.ENSP00000198767,9606.ENSP00000212015,9606.ENSP00000216037,9606.ENSP00000216117,9606.ENSP00000223095,9606.ENSP00000225174,9606.ENSP00000229416,9606.ENSP00000244050,9606.ENSP00000251849,9606.ENSP00000259808,9606.ENSP00000260356,9606.ENSP00000260442,9606.ENSP00000263339,9606.ENSP00000263640,9606.ENSP00000264832,9606.ENSP00000265371,9606.ENSP00000276431,9606.ENSP00000284637,9606.ENSP00000301838,…	RRN3,SIRT1,XBP1,HMOX1,SERPINE1,PPIF,GCLC,SNAI1,RAF1,RIPK1,THBS1,BCL2L10,IL1A,ACVR1,ICAM1,NRP1,TNFRSF10B,SH3RF1,FADD,CFLAR,CLU,HSPH1,SIAH2,PLAUR,CREB3,NR4A2,PEA15,MCL1,GCLM,PTPN1,EYA3,HSPA1B,SYVN1,TAF9,SGK3,NFE2L2,VIMP,RELA,BIRC6,HERPUD1,BDKRB2,TNFAIP3
GO:0023056	positive regulation of signaling	201	1638	0.13	0.00081	9606.ENSP00000013125,9606.ENSP00000056217,9606.ENSP00000157600,9606.ENSP00000164133,9606.ENSP00000202556,9606.ENSP00000212015,9606.ENSP00000215631,9606.ENSP00000216037,9606.ENSP00000216373,9606.ENSP00000220751,9606.ENSP00000225174,9606.ENSP00000226574,9606.ENSP00000228606,9606.ENSP00000230990,9606.ENSP00000240874,9606.ENSP00000244869,9606.ENSP00000245907,9606.ENSP00000246229,9606.ENSP00000248244,…	MAP4K5,ARHGEF5,LMCD1,PPP2R5B,PPP1R13B,SIRT1,GADD45B,XBP1,SOS2,RIPK2,PPIF,NFKB1,CYP27B1,HBEGF,KALRN,EREG,C3,PLAGL2,TICAM1,LIF,DLL4,RAF1,GDF15,JAG1,MBD2,IRAK2,RIPK1,SDCBP,THBS1,SEMA7A,TRAF4,NLRC5,VAMP7,C19orf10,MAP3K8,BRD4,BIRC3,ACVR1,MAP4K3,SLC9A1,CBL,MUL1,ALS2,RAPGEF2,DNAJC27,ICAM1,MAP3K13,GOLPH3,NRP1,GAL,CLSTN3,GAREM,PLK2,PELO,TNFRSF10B,CDKN2B,PAK1,FBXW7,FLT1,SH3RF1,FLCN,BRAF,ITGA5,FGF19,REL,TGF…
GO:0043161	proteasome-mediated ubiquitin-dependent protein catabolic process	47	257	0.3	0.00081	9606.ENSP00000158771,9606.ENSP00000185150,9606.ENSP00000212015,9606.ENSP00000219313,9606.ENSP00000221566,9606.ENSP00000237455,9606.ENSP00000242719,9606.ENSP00000249356,9606.ENSP00000256257,9606.ENSP00000256497,9606.ENSP00000259335,9606.ENSP00000261942,9606.ENSP00000263202,9606.ENSP00000280758,9606.ENSP00000281708,9606.ENSP00000299767,9606.ENSP00000301738,9606.ENSP00000304051,9606.ENSP00000306906,…	DERL2,ERLEC1,SIRT1,PSMD7,SGTA,RNF103,RNF11,DNAJB9,RNF122,EDEM1,KIAA0368,FAF2,UFD1L,BTBD11,FBXW7,HSP90B1,KCTD5,RNF139,RNF181,FBXO45,KCTD2,KLHL11,HSPA5,YOD1,NPLOC4,DNAJB2,UBE2H,TRIM38,VCP,TOPORS,SMURF1,BTRC,SYVN1,NFE2L2,PLAA,VIMP,NEDD4L,UBE2J2,ARNTL,ABTB2,RNF4,UBC,DDIT3,UBE2J1,RNF111,BIRC2,ITCH
GO:0071363	cellular response to growth factor stimulus	74	477	0.23	0.00085	9606.ENSP00000164133,9606.ENSP00000212015,9606.ENSP00000216037,9606.ENSP00000220325,9606.ENSP00000224140,9606.ENSP00000229340,9606.ENSP00000229416,9606.ENSP00000239938,9606.ENSP00000249749,9606.ENSP00000251849,9606.ENSP00000252809,9606.ENSP00000259808,9606.ENSP00000260356,9606.ENSP00000263640,9606.ENSP00000264033,9606.ENSP00000264431,9606.ENSP00000265165,9606.ENSP00000265371,9606.ENSP00000269209,…	PPP2R5B,SIRT1,XBP1,EHD4,SETX,RAB35,GCLC,EGR1,DLL4,RAF1,GDF15,RIPK1,THBS1,ACVR1,CBL,RAPGEF2,LEF1,NRP1,GAREM,FLT1,STAT5B,FGF19,CRK,FNTA,LRP8,FOS,CXCL8,DDIT4,ZCCHC12,CFLAR,USP9X,EGR3,HSPA5,PDGFB,SMAD3,CAV1,MAP2K3,SMURF1,MAPKAPK2,KDM5B,CTGF,F11R,NUS1,SHOC2,GCLM,JUN,ANKRD1,RAPGEF1,KLF4,PARD3,SPRY2,ERRFI1,FLRT3,BMP2,EDN1,GCNT2,FAM83G,AKT1S1,SLC33A1,USP8,RDX,KIF16B,RELA,HIPK2,FOXO3,CREB1,BCAR1,SHC1,SKIL…
GO:0044403	symbiont process	94	650	0.2	0.00088	9606.ENSP00000212015,9606.ENSP00000216797,9606.ENSP00000217402,9606.ENSP00000220509,9606.ENSP00000221566,9606.ENSP00000227520,9606.ENSP00000232496,9606.ENSP00000234420,9606.ENSP00000248248,9606.ENSP00000252229,9606.ENSP00000259808,9606.ENSP00000262213,9606.ENSP00000263377,9606.ENSP00000264033,9606.ENSP00000264157,9606.ENSP00000264832,9606.ENSP00000265165,9606.ENSP00000267202,9606.ENSP00000268184,…	SIRT1,NFKBIA,CHMP4B,VPS18,SGTA,CCDC86,TUSC2,MSH6,MON1B,MICB,RIPK1,TRAM1,BRD4,CBL,CCNT2,ICAM1,LEF1,VPS37B,CRTC3,NPC1,RAB5A,DYNC1LI1,SLC25A4,FBXW7,GTF2E1,ITGA5,UBAP1,KCTD5,VPS37C,FADD,CFLAR,NUP98,VPS37A,SUPT6H,MMP1,KARS,KPNA7,SMAD3,RRP1B,CAV1,SLC20A2,CREB3,NUP50,TBC1D20,TAP1,SND1,UVRAG,EPHA2,ANKRD17,VCP,NUP214,RAET1L,F11R,EIF3A,RBM15,GBF1,BTRC,JUN,ZC3H12A,UBR4,HSPA1B,SPEN,NMT2,NFX1,DDX58,TRIM5,SERP…
GO:0070498	interleukin-1-mediated signaling pathway	17	51	0.56	0.00091	9606.ENSP00000216797,9606.ENSP00000220751,9606.ENSP00000226574,9606.ENSP00000239938,9606.ENSP00000256458,9606.ENSP00000263056,9606.ENSP00000263339,9606.ENSP00000314733,9606.ENSP00000351789,9606.ENSP00000359206,9606.ENSP00000359424,9606.ENSP00000374455,9606.ENSP00000384273,9606.ENSP00000433623,9606.ENSP00000441543,9606.ENSP00000479667,9606.ENSP00000483825	NFKBIA,RIPK2,NFKB1,EGR1,IRAK2,MAP3K8,IL1A,TOLLIP,PELI1,BTRC,CHUK,SQSTM1,RELA,TRAF6,UBC,RPS6KA5,IKBKG
GO:2000026	regulation of multicellular organismal development	225	1876	0.12	0.00097	9606.ENSP00000164024,9606.ENSP00000164133,9606.ENSP00000166139,9606.ENSP00000171111,9606.ENSP00000198767,9606.ENSP00000212015,9606.ENSP00000216037,9606.ENSP00000216117,9606.ENSP00000216797,9606.ENSP00000220592,9606.ENSP00000220751,9606.ENSP00000223095,9606.ENSP00000224140,9606.ENSP00000228606,9606.ENSP00000234198,9606.ENSP00000234420,9606.ENSP00000235382,9606.ENSP00000236925,9606.ENSP00000239938,…	CELSR3,PPP2R5B,FSTL3,KEAP1,RRN3,SIRT1,XBP1,HMOX1,NFKBIA,AGO2,RIPK2,SERPINE1,SETX,CYP27B1,DLX2,MSH6,RGS2,CAMSAP2,EGR1,KALRN,SNAI1,IRF1,TNFSF9,C3,LIF,DLL4,NUMBL,RARA,H3F3B,JAG1,BTG1,TBX3,RIPK1,SDCBP,THBS1,LHX5,MAPK6,SEMA7A,MMD,VAMP7,ACIN1,C19orf10,IL1A,ACVR1,MUL1,RAPGEF2,LEF1,FSTL4,SRF,NRP1,GAL,CLSTN3,RHOB,EAF2,PLK2,PAK1,CCRN4L,FBXW7,FLT1,NIPBL,UBASH3B,TRIM11,SH3RF1,FLCN,ISL2,STAT5B,ITGA5,MITF,AQP3…
GO:0016310	phosphorylation	158	1236	0.15	0.001	9606.ENSP00000013125,9606.ENSP00000220751,9606.ENSP00000224140,9606.ENSP00000226574,9606.ENSP00000229395,9606.ENSP00000230990,9606.ENSP00000240874,9606.ENSP00000244869,9606.ENSP00000246914,9606.ENSP00000249075,9606.ENSP00000250896,9606.ENSP00000251849,9606.ENSP00000254066,9606.ENSP00000256383,9606.ENSP00000256458,9606.ENSP00000259808,9606.ENSP00000261435,9606.ENSP00000261643,9606.ENSP00000261845,…	MAP4K5,RIPK2,SETX,NFKB1,FGFR1OP2,HBEGF,KALRN,EREG,WNK4,LIF,MKNK2,RAF1,RARA,EIF2S1,IRAK2,RIPK1,N4BP2,COX10,MAPK6,PIK3C3,MMD,CCNE1,MAP3K8,ITPKC,ACVR1,MAP4K3,CCNT2,MUL1,PIKFYVE,RAPGEF2,MAP3K13,NRP1,CHKA,GTF2H1,SIK1,SCYL1,PLK2,PAK1,FLT1,RIOK2,PRKAG2,IPPK,BRAF,STAT5B,FGF19,SNRK,LMTK2,ADORA2B,SIK2,PRKCE,PPM1D,EIF2AK3,CYCS,RPS6KB2,TRIB1,PANK2,SPHK1,TOLLIP,TLK2,CLK4,PIBF1,STK17A,KARS,PDGFB,RIPK4,HSP90AA1…
GO:0044087	regulation of cellular component biogenesis	118	867	0.18	0.001	9606.ENSP00000056217,9606.ENSP00000164133,9606.ENSP00000198767,9606.ENSP00000199320,9606.ENSP00000217402,9606.ENSP00000220509,9606.ENSP00000224140,9606.ENSP00000225235,9606.ENSP00000236925,9606.ENSP00000238738,9606.ENSP00000243045,9606.ENSP00000244050,9606.ENSP00000251849,9606.ENSP00000254322,9606.ENSP00000254810,9606.ENSP00000256001,9606.ENSP00000260130,9606.ENSP00000260356,9606.ENSP00000260643,…	ARHGEF5,PPP2R5B,RRN3,DIMT1,CHMP4B,VPS18,SETX,TBC1D12,CAMSAP2,RHOQ,ORMDL2,SNAI1,RAF1,DNAJB1,H3F3B,ACTR3B,SDCBP,THBS1,PREB,TRIM37,SLC9A1,LCAT,SLAIN2,PIKFYVE,RAPGEF2,ICAM1,SRF,NRP1,GTF2H1,CLSTN3,RAB5A,PLK2,DLC1,PAK1,TJP1,RIOK2,WHAMM,CDC42EP3,MITF,ICE1,F2RL1,UTP15,TSC1,RUNX1,PRKCE,FOSL1,WDR75,CLU,SWAP70,SSH1,MMP1,AMIGO3,PMAIP1,ATAT1,SMAD3,NDEL1,HSP90AA1,SPTY2D1,DNAJB2,CAV1,RIOK3,INSIG1,ARPC5L,PMEPA1,…
GO:0001568	blood vessel development	72	464	0.23	0.0011	9606.ENSP00000212015,9606.ENSP00000216037,9606.ENSP00000216117,9606.ENSP00000223095,9606.ENSP00000239938,9606.ENSP00000242057,9606.ENSP00000244869,9606.ENSP00000249749,9606.ENSP00000254958,9606.ENSP00000257566,9606.ENSP00000260356,9606.ENSP00000261523,9606.ENSP00000262225,9606.ENSP00000262947,9606.ENSP00000263640,9606.ENSP00000264036,9606.ENSP00000264431,9606.ENSP00000265165,9606.ENSP00000265354,…	SIRT1,XBP1,HMOX1,SERPINE1,EGR1,AHR,EREG,DLL4,JAG1,TBX3,THBS1,RORA,TMED2,C19orf10,ACVR1,MCAM,RAPGEF2,LEF1,SRF,NRP1,RHOB,FLT1,OTULIN,ITGA5,DCTN5,ANGPTL4,JUNB,LUZP1,CXCL8,EIF2AK3,FOSL1,HEG1,SPHK1,EGR3,TNFRSF12A,SOCS3,PDGFB,ARID2,CAV1,PDGFA,NRARP,ADIPOR2,EPHA2,ANKRD17,PROX1,CTGF,EFNA1,NUS1,ECM1,PRDM1,RBM15,NSDHL,JUN,RAPGEF1,ZC3H12A,BAK1,SHB,EDN1,NKX3-1,ETS1,SETD2,C1GALT1,CHD7,JMJD6,CYR61,GNA13,SHC1,T…
GO:0033043	regulation of organelle organization	149	1155	0.15	0.0011	9606.ENSP00000056217,9606.ENSP00000179259,9606.ENSP00000202556,9606.ENSP00000209728,9606.ENSP00000212015,9606.ENSP00000215904,9606.ENSP00000216037,9606.ENSP00000217402,9606.ENSP00000220509,9606.ENSP00000225174,9606.ENSP00000225235,9606.ENSP00000236925,9606.ENSP00000238738,9606.ENSP00000238789,9606.ENSP00000239223,9606.ENSP00000244869,9606.ENSP00000249075,9606.ENSP00000252992,9606.ENSP00000254810,…	ARHGEF5,C12orf5,PPP1R13B,CDC6,SIRT1,PDXP,XBP1,CHMP4B,VPS18,PPIF,TBC1D12,CAMSAP2,RHOQ,ATAD2B,DUSP1,EREG,LIF,CEP85,H3F3B,ACTR3B,SDCBP,PREB,TRIM37,IL1A,SLC9A1,MUL1,SLAIN2,PIKFYVE,ICAM1,GOLPH3,NRP1,JDP2,AKAP8,RAB5A,DYNC1LI1,PLK2,DLC1,PAK1,FBXW7,TRIM36,NIPBL,RIOK2,FLCN,WHAMM,NSMCE2,STX5,CDC42EP3,TGFA,KIAA0226,F2RL1,TSC1,TERF2IP,CRK,CDK2AP2,PRKCE,YWHAG,TADA2B,CLU,SWAP70,SSH1,TLK2,PLD6,PINX1,SUPT6H,PRMT…
GO:0051336	regulation of hydrolase activity	158	1238	0.15	0.0011	9606.ENSP00000033079,9606.ENSP00000056217,9606.ENSP00000164133,9606.ENSP00000200453,9606.ENSP00000212015,9606.ENSP00000220751,9606.ENSP00000221086,9606.ENSP00000223095,9606.ENSP00000225174,9606.ENSP00000225235,9606.ENSP00000228515,9606.ENSP00000234420,9606.ENSP00000235382,9606.ENSP00000240874,9606.ENSP00000244230,9606.ENSP00000245907,9606.ENSP00000250457,9606.ENSP00000251691,9606.ENSP00000251849,…	FAM13B,ARHGEF5,PPP2R5B,PPP1R15A,SIRT1,RIPK2,MTMR9,SERPINE1,PPIF,TBC1D12,CSRNP2,MSH6,RGS2,KALRN,MPHOSPH10,C3,EGLN3,KIAA1244,RAF1,ZCCHC9,DNAJB1,AKIRIN2,RIPK1,THBS1,BCL2L10,ARHGAP29,PREB,TMED2,ELL,ARFGAP3,BIRC3,MUL1,ALS2,RASGEF1B,RAPGEF2,ICAM1,LEF1,NRP1,DLC1,TNFRSF10B,FLT1,SH3RF1,ARHGAP17,CDC42EP3,PCOLCE2,F2RL1,LMTK2,TSC1,ARHGAP42,HSP90B1,CRK,ANGPTL4,FADD,ARAP2,FNTA,EIF2AK3,CYCS,PPP1R3B,BOD1,TNFRSF1…
GO:0070848	response to growth factor	77	507	0.22	0.0011	9606.ENSP00000164133,9606.ENSP00000212015,9606.ENSP00000216037,9606.ENSP00000220325,9606.ENSP00000224140,9606.ENSP00000229340,9606.ENSP00000229416,9606.ENSP00000239938,9606.ENSP00000249749,9606.ENSP00000251849,9606.ENSP00000252809,9606.ENSP00000259808,9606.ENSP00000260356,9606.ENSP00000263640,9606.ENSP00000264033,9606.ENSP00000264431,9606.ENSP00000265165,9606.ENSP00000265371,9606.ENSP00000269209,…	PPP2R5B,SIRT1,XBP1,EHD4,SETX,RAB35,GCLC,EGR1,DLL4,RAF1,GDF15,RIPK1,THBS1,ACVR1,CBL,RAPGEF2,LEF1,NRP1,GAREM,FLT1,STAT5B,FGF19,CRK,FNTA,LRP8,FOS,CXCL8,DDIT4,ZCCHC12,CFLAR,USP9X,EGR3,HSPA5,PDGFB,SMAD3,CAV1,MAP2K3,EPHA2,SMURF1,MAPKAPK2,KDM5B,CTGF,F11R,NUS1,SHOC2,GCLM,JUN,ANKRD1,RAPGEF1,KLF4,PARD3,SPRY2,ERRFI1,FLRT3,BMP2,EDN1,GCNT2,FAM83G,AKT1S1,SLC33A1,USP8,RDX,KIF16B,RELA,HIPK2,FOXO3,CREB1,BCAR1,SHC…
GO:0043281	regulation of cysteine-type endopeptidase activity involved in apoptotic process	40	209	0.32	0.0012	9606.ENSP00000212015,9606.ENSP00000250457,9606.ENSP00000251849,9606.ENSP00000259808,9606.ENSP00000260356,9606.ENSP00000260442,9606.ENSP00000263464,9606.ENSP00000264198,9606.ENSP00000265165,9606.ENSP00000276297,9606.ENSP00000276431,9606.ENSP00000284637,9606.ENSP00000301838,9606.ENSP00000307235,9606.ENSP00000307786,9606.ENSP00000310263,9606.ENSP00000312455,9606.ENSP00000322457,9606.ENSP00000326119,…	SIRT1,EGLN3,RAF1,RIPK1,THBS1,BCL2L10,BIRC3,MUL1,LEF1,DLC1,TNFRSF10B,SH3RF1,FADD,EIF2AK3,CYCS,TNFRSF10D,CFLAR,SIAH2,PMAIP1,SMAD3,PLAUR,SFN,VCP,CTGF,BCL10,MTCH1,BAK1,KLF4,XDH,SERPINB9,NKX3-1,SLC11A2,DIABLO,CYR61,HERPUD1,FNIP1,CRYAB,RPS6KA1,BIRC2,BCL2L13
GO:0014070	response to organic cyclic compound	118	873	0.17	0.0013	9606.ENSP00000215904,9606.ENSP00000216797,9606.ENSP00000220592,9606.ENSP00000220751,9606.ENSP00000222553,9606.ENSP00000226574,9606.ENSP00000228606,9606.ENSP00000229416,9606.ENSP00000239223,9606.ENSP00000239938,9606.ENSP00000240874,9606.ENSP00000242057,9606.ENSP00000245919,9606.ENSP00000246672,9606.ENSP00000248244,9606.ENSP00000251871,9606.ENSP00000252818,9606.ENSP00000254066,9606.ENSP00000256429,…	PDXP,NFKBIA,AGO2,RIPK2,NAMPT,NFKB1,CYP27B1,GCLC,DUSP1,EGR1,KALRN,AHR,FOSB,NR1D1,TICAM1,MED17,JUND,RARA,MBD2,THBS1,RORA,CCNE1,SLC9A1,CBL,MUL1,RAPGEF2,ICAM1,SOX30,LEF1,CHKA,NPC1,PLIN2,BTG2,STAT5B,SNIP1,AQP3,HSP90B1,FADD,JUNB,LRP8,CEBPB,PRKCE,FOS,DDIT4,PDE12,NR1D2,FOSL1,PPARD,CFLAR,PER1,SSH1,CALR,HMGCS1,HSPA5,PPP2R2A,PMAIP1,PDGFB,PDE4B,SMAD3,HOMER1,CAV1,RIOK3,NR4A2,INSIG1,PMEPA1,PELI1,P2RX4,MTOR,CTG…
GO:0030155	regulation of cell adhesion	90	623	0.2	0.0013	9606.ENSP00000166139,9606.ENSP00000216037,9606.ENSP00000220751,9606.ENSP00000223095,9606.ENSP00000245414,9606.ENSP00000245817,9606.ENSP00000254066,9606.ENSP00000254958,9606.ENSP00000257527,9606.ENSP00000260356,9606.ENSP00000263056,9606.ENSP00000263980,9606.ENSP00000264832,9606.ENSP00000265165,9606.ENSP00000265354,9606.ENSP00000265371,9606.ENSP00000276297,9606.ENSP00000278568,9606.ENSP00000284273,…	FSTL3,XBP1,RIPK2,SERPINE1,IRF1,TNFSF9,RARA,JAG1,ADAM19,THBS1,MAP3K8,SLC9A1,ICAM1,LEF1,SRF,NRP1,DLC1,PAK1,UBASH3B,FLCN,STAT5B,ITGA5,CYTH3,TSC1,RUNX1,CRK,FADD,IL12A,CEBPB,PRKCE,CXCL8,RND1,TFE3,SWAP70,STX4,EGR3,HSPH1,MALT1,CALR,LAMA3,NFKBIZ,CSF1,SMAD3,STX3,CAV1,NET1,NRARP,BTN2A2,EPHA2,PELI1,CYTH1,DUSP10,EFNA1,SLK,BCL10,PPAP2B,DLG5,SDC4,PLAU,ZC3H12A,KLF4,HLA-E,BMP2,CD83,RGCC,GCNT2,CD274,GPNMB,LAMA1,M…
GO:0097190	apoptotic signaling pathway	51	295	0.28	0.0013	9606.ENSP00000064780,9606.ENSP00000164227,9606.ENSP00000200453,9606.ENSP00000202556,9606.ENSP00000212015,9606.ENSP00000216037,9606.ENSP00000216117,9606.ENSP00000234420,9606.ENSP00000248244,9606.ENSP00000250896,9606.ENSP00000251849,9606.ENSP00000254605,9606.ENSP00000259808,9606.ENSP00000260442,9606.ENSP00000263339,9606.ENSP00000276431,9606.ENSP00000296444,9606.ENSP00000301838,9606.ENSP00000303231,…	RELT,BCL3,PPP1R15A,PPP1R13B,SIRT1,XBP1,HMOX1,MSH6,TICAM1,MKNK2,RAF1,RRP8,RIPK1,BCL2L10,IL1A,TNFRSF10B,SHISA5,FADD,IL12A,CEBPB,DDIT4,CYCS,ZNF622,TNFRSF10D,PPARD,CLU,PMAIP1,TNFRSF12A,AEN,SMAD3,CAV1,SFN,TP53BP2,RNF41,EPHA2,P2RX4,TOPORS,IL6R,MCL1,BAG3,JUN,BAK1,CDKN1A,HIPK2,FOXO3,DIABLO,CSB-PGBD3,DAPK3,DDIT3,DEDD2,TNFRSF9
GO:0001666	response to hypoxia	50	288	0.28	0.0014	9606.ENSP00000179259,9606.ENSP00000212015,9606.ENSP00000216117,9606.ENSP00000239938,9606.ENSP00000250457,9606.ENSP00000251849,9606.ENSP00000260356,9606.ENSP00000261523,9606.ENSP00000263980,9606.ENSP00000264832,9606.ENSP00000265354,9606.ENSP00000278568,9606.ENSP00000297991,9606.ENSP00000299767,9606.ENSP00000301455,9606.ENSP00000306124,9606.ENSP00000307260,9606.ENSP00000307305,9606.ENSP00000309968,…	C12orf5,SIRT1,HMOX1,EGR1,EGLN3,RAF1,THBS1,RORA,SLC9A1,ICAM1,SRF,PAK1,AQP3,HSP90B1,ANGPTL4,PRKCE,TBL2,DDIT4,ADAM17,PPARD,CFLAR,PMAIP1,P4HB,SMAD3,CAV1,NR4A2,MTOR,ANKRD1,PLK3,PLAU,BMP2,RGCC,EDN1,NKX3-1,ETS1,SLC11A2,NFE2L2,ALKBH5,BACH1,HIPK2,FOXO3,CREB1,SCFD1,CRYAB,ADM,UBC,CPEB2,CITED2,WTIP,BIRC2
GO:0042149	cellular response to glucose starvation	14	37	0.62	0.0014	9606.ENSP00000216037,9606.ENSP00000253063,9606.ENSP00000254605,9606.ENSP00000262039,9606.ENSP00000307235,9606.ENSP00000307260,9606.ENSP00000324173,9606.ENSP00000326119,9606.ENSP00000330032,9606.ENSP00000356125,9606.ENSP00000362179,9606.ENSP00000380252,9606.ENSP00000384651,9606.ENSP00000476312	XBP1,SESN2,RRP8,PIK3C3,EIF2AK3,TBL2,HSPA5,PMAIP1,UPP1,NUAK2,ZC3H12A,NFE2L2,MTMR3,BHLHA15
GO:0010256	endomembrane system organization	56	337	0.26	0.0015	9606.ENSP00000163416,9606.ENSP00000217402,9606.ENSP00000220509,9606.ENSP00000221566,9606.ENSP00000231668,9606.ENSP00000234160,9606.ENSP00000258654,9606.ENSP00000259339,9606.ENSP00000262039,9606.ENSP00000262225,9606.ENSP00000264276,9606.ENSP00000265070,9606.ENSP00000265857,9606.ENSP00000265909,9606.ENSP00000267202,9606.ENSP00000267622,9606.ENSP00000286760,9606.ENSP00000294179,9606.ENSP00000301765,…	GOLGA5,CHMP4B,VPS18,SGTA,BNIP1,GORASP2,COG3,TOR1B,PIK3C3,TMED2,ALS2,GOLPH3,GET4,SNX19,VPS37B,TRIP11,WHAMM,STX5,VPS37C,EIF2AK3,ATP8B3,FAM109B,CLU,VPS37A,PRMT5,SEC16A,TMED9,NPLOC4,NDEL1,CAV1,TBC1D20,EXOC8,SEC23IP,GBF1,PI4K2A,STX16,SURF4,PLK3,TJAP1,PLEKHM2,STAM,OPTN,KIFC3,LYST,SQSTM1,GOLGB1,USP8,TMF1,AGFG1,CREB1,BLOC1S3,LPIN1,RAB30,ATP2A2,USO1,BHLHA15
GO:0032434	regulation of proteasomal ubiquitin-dependent protein catabolic process	29	131	0.39	0.0015	9606.ENSP00000171111,9606.ENSP00000216037,9606.ENSP00000221566,9606.ENSP00000229416,9606.ENSP00000260130,9606.ENSP00000262384,9606.ENSP00000274289,9606.ENSP00000287437,9606.ENSP00000312150,9606.ENSP00000313391,9606.ENSP00000314619,9606.ENSP00000315130,9606.ENSP00000316512,9606.ENSP00000321239,9606.ENSP00000326095,9606.ENSP00000338019,9606.ENSP00000339191,9606.ENSP00000346986,9606.ENSP00000351777,…	KEAP1,XBP1,SGTA,GCLC,SDCBP,N4BP1,PLK2,NSMCE2,TRIB1,DAB2,ZFAND2A,CLU,TLK2,RCHY1,RNF166,DNAJB2,CAV1,WAC,VCP,DDA1,LONRF3,PLK3,RNF19B,TAF9,CSNK1E,NFE2L2,LONRF1,HERPUD1,RYBP
GO:0051091	positive regulation of DNA-binding transcription factor activity	45	250	0.3	0.0015	9606.ENSP00000056217,9606.ENSP00000164133,9606.ENSP00000220751,9606.ENSP00000226574,9606.ENSP00000248244,9606.ENSP00000256458,9606.ENSP00000259808,9606.ENSP00000262294,9606.ENSP00000264832,9606.ENSP00000265026,9606.ENSP00000265354,9606.ENSP00000268184,9606.ENSP00000278070,9606.ENSP00000295704,9606.ENSP00000300086,9606.ENSP00000301068,9606.ENSP00000303634,9606.ENSP00000310170,9606.ENSP00000312455,…	ARHGEF5,PPP2R5B,RIPK2,NFKB1,TICAM1,IRAK2,RIPK1,TRIM37,ICAM1,MAP3K13,SRF,CRTC3,PPRC1,RNF25,TERF2IP,RHEBL1,LRP8,FOSL1,CFLAR,SPHK1,CLU,MALT1,RIPK4,SMAD3,RNF41,TRIM38,DDR2,NFKB2,CHUK,BCL10,PPAP2B,HSPA1B,RGCC,EDN1,DDX58,TRIM5,RELA,HIPK2,TLR6,TRAF6,UBC,DDIT3,ERC1,RPS6KA5,IKBKG
GO:0071407	cellular response to organic cyclic compound	76	505	0.22	0.0015	9606.ENSP00000215904,9606.ENSP00000216797,9606.ENSP00000220592,9606.ENSP00000226574,9606.ENSP00000229416,9606.ENSP00000239938,9606.ENSP00000242057,9606.ENSP00000246672,9606.ENSP00000251871,9606.ENSP00000254066,9606.ENSP00000256429,9606.ENSP00000261523,9606.ENSP00000262643,9606.ENSP00000263980,9606.ENSP00000264198,9606.ENSP00000264431,9606.ENSP00000264832,9606.ENSP00000265165,9606.ENSP00000269228,…	PDXP,NFKBIA,AGO2,NFKB1,GCLC,EGR1,AHR,NR1D1,MED17,RARA,MBD2,RORA,CCNE1,SLC9A1,MUL1,RAPGEF2,ICAM1,LEF1,NPC1,SNIP1,HSP90B1,LRP8,CEBPB,DDIT4,PDE12,NR1D2,PPARD,CFLAR,SSH1,CALR,HMGCS1,HSPA5,PDGFB,PDE4B,SMAD3,CAV1,RIOK3,NR4A2,INSIG1,PMEPA1,P2RX4,CASP7,BTRC,GCLM,ABCC2,ANKRD1,NCOA3,RAPGEF1,ZC3H12A,AGO3,PIM1,KLF4,ZCCHC6,KLF9,ERRFI1,BMP2,EDN1,DDX58,NKX3-1,RAE1,USP8,HRH1,MED13,TMF1,FOXO3,KDM3A,FHL2,ATP2B1,NR…
GO:2000060	positive regulation of ubiquitin-dependent protein catabolic process	25	104	0.42	0.0015	9606.ENSP00000171111,9606.ENSP00000216037,9606.ENSP00000221566,9606.ENSP00000229416,9606.ENSP00000274289,9606.ENSP00000281708,9606.ENSP00000287437,9606.ENSP00000304051,9606.ENSP00000312150,9606.ENSP00000313391,9606.ENSP00000314619,9606.ENSP00000315130,9606.ENSP00000321239,9606.ENSP00000326095,9606.ENSP00000338019,9606.ENSP00000339191,9606.ENSP00000351777,9606.ENSP00000354621,9606.ENSP00000360690,…	KEAP1,XBP1,SGTA,GCLC,PLK2,FBXW7,NSMCE2,RNF139,TRIB1,DAB2,ZFAND2A,CLU,RCHY1,RNF166,DNAJB2,CAV1,VCP,SMURF1,LONRF3,PLK3,RNF19B,CSNK1E,NFE2L2,LONRF1,HERPUD1
GO:0006508	proteolysis	153	1203	0.15	0.0016	9606.ENSP00000158771,9606.ENSP00000161006,9606.ENSP00000171111,9606.ENSP00000185150,9606.ENSP00000212015,9606.ENSP00000216037,9606.ENSP00000216039,9606.ENSP00000216797,9606.ENSP00000217402,9606.ENSP00000219313,9606.ENSP00000220751,9606.ENSP00000221566,9606.ENSP00000226574,9606.ENSP00000237455,9606.ENSP00000242719,9606.ENSP00000245907,9606.ENSP00000246672,9606.ENSP00000247977,9606.ENSP00000248958,…	DERL2,PRSS22,KEAP1,ERLEC1,SIRT1,XBP1,JOSD1,NFKBIA,CHMP4B,PSMD7,RIPK2,SGTA,NFKB1,RNF103,RNF11,C3,NR1D1,FBXL12,SDF2L1,DNAJB9,USPL1,RNF122,EDEM1,ADAM19,KIAA0368,RIPK1,USP2,MMP13,PSMD11,FAF2,PIK3C3,DPP9,UFD1L,BIRC3,CBL,PSMD3,GET4,TINAGL1,PRSS23,BTBD11,FBXW7,USP12,OTULIN,SENP2,UBAP1,HSP90B1,KCTD5,FADD,LRP8,CDC25A,RNF139,TMEM208,DESI2,RNF181,TADA2B,RCE1,ADAM17,NRIP3,FBXO45,CFLAR,KCTD2,KLHL11,TOLLIP,NUP…
GO:0019221	cytokine-mediated signaling pathway	93	655	0.19	0.0017	9606.ENSP00000064780,9606.ENSP00000212015,9606.ENSP00000216117,9606.ENSP00000216797,9606.ENSP00000220751,9606.ENSP00000226574,9606.ENSP00000227752,9606.ENSP00000239938,9606.ENSP00000244869,9606.ENSP00000245414,9606.ENSP00000245817,9606.ENSP00000249075,9606.ENSP00000252891,9606.ENSP00000256458,9606.ENSP00000257570,9606.ENSP00000259808,9606.ENSP00000261523,9606.ENSP00000263056,9606.ENSP00000263339,…	RELT,SIRT1,HMOX1,NFKBIA,RIPK2,NFKB1,IL10RA,EGR1,EREG,IRF1,TNFSF9,LIF,NUMBL,IRAK2,OASL,RIPK1,RORA,MAP3K8,IL1A,BIRC3,CBL,ICAM1,TNFRSF10B,IFNGR2,STAT5B,CXCL3,CXCL5,HSP90B1,CRK,IL12A,JUNB,LRP8,FOS,CXCL8,ISG20,CLCF1,ADAM17,TNFRSF10D,TOLLIP,STX4,MMP1,KARS,TNFRSF12A,CSF1,P4HB,IFNLR1,SOCS3,PDGFB,MX2,HSP90AA1,STX3,TRIM38,ADIPOR2,CCRL2,PELI1,ZEB1,CTR9,IRF6,IL6R,MCL1,RBM15,BTRC,CHUK,RAPGEF1,PIM1,IRS2,HLA-E,…
GO:0006979	response to oxidative stress	60	373	0.25	0.0018	9606.ENSP00000212015,9606.ENSP00000216037,9606.ENSP00000216117,9606.ENSP00000220659,9606.ENSP00000221130,9606.ENSP00000224140,9606.ENSP00000225174,9606.ENSP00000229416,9606.ENSP00000239223,9606.ENSP00000252229,9606.ENSP00000253063,9606.ENSP00000254846,9606.ENSP00000256015,9606.ENSP00000256383,9606.ENSP00000262198,9606.ENSP00000264276,9606.ENSP00000272233,9606.ENSP00000280612,9606.ENSP00000285381,…	SIRT1,XBP1,HMOX1,BRF2,GSR,SETX,PPIF,GCLC,DUSP1,MICB,SESN2,KDM6B,BTG1,EIF2S1,ADNP2,ALS2,RHOB,SLC7A11,CA3,CRK,FOS,CYCS,ZNF622,FOSL1,CFLAR,STX4,NR4A2,NET1,PPP1R15B,GLRX2,GCLM,CHUK,ABCC2,JUN,PLK3,MTF1,ZC3H12A,ADPRHL2,BAK1,KLF4,HSPA1B,EDN1,SRXN1,GPX3,ETS1,SLC11A2,NFE2L2,VIMP,RELA,ARNTL,FOXO3,PNPT1,TRA2B,CSB-PGBD3,CRYAB,TXNRD1,ATP2A2,CPEB2,TNFAIP3,NR4A3
GO:0019216	regulation of lipid metabolic process	60	373	0.25	0.0018	9606.ENSP00000212015,9606.ENSP00000216037,9606.ENSP00000221086,9606.ENSP00000226574,9606.ENSP00000228606,9606.ENSP00000239938,9606.ENSP00000243045,9606.ENSP00000244050,9606.ENSP00000245787,9606.ENSP00000245907,9606.ENSP00000246672,9606.ENSP00000261523,9606.ENSP00000265643,9606.ENSP00000265896,9606.ENSP00000268184,9606.ENSP00000270162,9606.ENSP00000276914,9606.ENSP00000277746,9606.ENSP00000281708,…	SIRT1,XBP1,MTMR9,NFKB1,CYP27B1,EGR1,ORMDL2,SNAI1,INSIG2,C3,NR1D1,RORA,GAL,SQLE,CRTC3,SIK1,PLIN2,NRBF2,FBXW7,FLT1,PRKAG2,STAT5B,FGF19,KIAA0226,MVD,ANGPTL4,PRKCE,NR1D2,PANK2,PIBF1,HMGCS1,GRHL1,PDGFB,CAV1,INSIG1,NFYA,PDGFA,ADIPOR2,MTOR,PROX1,SORBS1,ANKRD1,KLF4,IRS2,BMP2,SIN3B,GPS2,ALAS1,PDP1,MTMR3,FHL2,CREB1,ABHD5,CYR61,TXNRD1,MVK,LDLR,CHD9,SEC14L2,NR4A3
GO:0062012	regulation of small molecule metabolic process	55	332	0.26	0.0018	9606.ENSP00000179259,9606.ENSP00000212015,9606.ENSP00000225174,9606.ENSP00000226574,9606.ENSP00000228606,9606.ENSP00000230361,9606.ENSP00000234111,9606.ENSP00000239938,9606.ENSP00000244050,9606.ENSP00000245787,9606.ENSP00000246672,9606.ENSP00000253063,9606.ENSP00000261523,9606.ENSP00000265896,9606.ENSP00000270162,9606.ENSP00000285071,9606.ENSP00000287878,9606.ENSP00000294312,9606.ENSP00000300952,…	C12orf5,SIRT1,PPIF,NFKB1,CYP27B1,GUCA1B,ODC1,EGR1,SNAI1,INSIG2,NR1D1,SESN2,RORA,SQLE,SIK1,FLCN,PRKAG2,FGF19,MIDN,MVD,ADORA2B,PRKCE,SLC25A33,DDIT4,PPP1R3B,PDE12,PANK2,PIBF1,HMGCS1,PMAIP1,PDGFB,CAV1,INSIG1,NFYA,ADIPOR2,VCP,ENPP1,MTOR,PROX1,DUSP12,SORBS1,IRS2,BMP2,IGFBP3,PDP1,HRH1,VIMP,GRB10,PFKFB3,MVK,LDLR,OAZ1,SEC14L2,CLTC,NR4A3
GO:0071216	cellular response to biotic stimulus	35	176	0.34	0.0018	9606.ENSP00000216037,9606.ENSP00000216797,9606.ENSP00000220751,9606.ENSP00000223095,9606.ENSP00000226574,9606.ENSP00000246672,9606.ENSP00000248244,9606.ENSP00000254066,9606.ENSP00000256458,9606.ENSP00000264832,9606.ENSP00000269701,9606.ENSP00000303231,9606.ENSP00000305422,9606.ENSP00000306124,9606.ENSP00000306512,9606.ENSP00000307235,9606.ENSP00000310928,9606.ENSP00000312988,9606.ENSP00000324173,…	XBP1,NFKBIA,RIPK2,SERPINE1,NFKB1,NR1D1,TICAM1,RARA,IRAK2,ICAM1,AKAP8,IL12A,CEBPB,PRKCE,CXCL8,EIF2AK3,PPARD,NFKBIB,HSPA5,PDE4B,SBNO2,CTR9,PPP1R15B,ABCC2,ANKRD1,ZC3H12A,PLAA,VIMP,RELA,TLR6,TRAF6,DDIT3,LITAF,ZFP36,TNFAIP3
GO:2000377	regulation of reactive oxygen species metabolic process	34	169	0.35	0.0018	9606.ENSP00000179259,9606.ENSP00000218516,9606.ENSP00000232496,9606.ENSP00000248244,9606.ENSP00000259808,9606.ENSP00000260356,9606.ENSP00000264832,9606.ENSP00000296677,9606.ENSP00000306328,9606.ENSP00000312455,9606.ENSP00000315130,9606.ENSP00000319192,9606.ENSP00000330382,9606.ENSP00000332973,9606.ENSP00000335153,9606.ENSP00000339191,9606.ENSP00000342755,9606.ENSP00000353032,9606.ENSP00000354558,…	C12orf5,GLA,TUSC2,TICAM1,RIPK1,THBS1,ICAM1,F2RL1,SLC25A33,CFLAR,CLU,STK17A,PDGFB,SMAD3,HSP90AA1,CAV1,RNF41,P2RX4,MTOR,NOS1AP,GADD45A,ZC3H12A,KLF4,EDN1,XDH,NFE2L2,VIMP,CDKN1A,FOXO3,TLR6,SHC1,GCH1,CRYAB,BIRC2
GO:0051704	multi-organism process	287	2514	0.1	0.0019	9606.ENSP00000064780,9606.ENSP00000158771,9606.ENSP00000164227,9606.ENSP00000166139,9606.ENSP00000204726,9606.ENSP00000212015,9606.ENSP00000216037,9606.ENSP00000216629,9606.ENSP00000216797,9606.ENSP00000217402,9606.ENSP00000220509,9606.ENSP00000220751,9606.ENSP00000221452,9606.ENSP00000221566,9606.ENSP00000222553,9606.ENSP00000223095,9606.ENSP00000224140,9606.ENSP00000226574,9606.ENSP00000227520,…	RELT,DERL2,BCL3,FSTL3,GOLGA3,SIRT1,XBP1,BDKRB1,NFKBIA,CHMP4B,VPS18,RIPK2,RELB,SGTA,NAMPT,SERPINE1,SETX,NFKB1,CCDC86,IL10RA,CYP27B1,CLEC4A,BYSL,TUSC2,ODC1,MSH6,RGS2,EGR1,KALRN,EREG,IRF1,C3,FOSB,NR1D1,TICAM1,MON1B,LIF,MICB,JUND,RARA,H3F3B,BTG1,IRAK2,OASL,AKIRIN2,RIPK1,BCL2L10,TRAM1,TMED2,NLRC5,VAMP7,BRD4,BIRC3,ACVR1,CBL,CCNT2,ARID4B,ICAM1,SOX30,LEF1,AFF4,CREM,VPS37B,CRTC3,TAF4B,NPC1,AKAP8,RAB5A,DYN…
GO:0010506	regulation of autophagy	49	286	0.28	0.0021	9606.ENSP00000179259,9606.ENSP00000212015,9606.ENSP00000216037,9606.ENSP00000216117,9606.ENSP00000217402,9606.ENSP00000220751,9606.ENSP00000221086,9606.ENSP00000225235,9606.ENSP00000248244,9606.ENSP00000253063,9606.ENSP00000264198,9606.ENSP00000264380,9606.ENSP00000269221,9606.ENSP00000269228,9606.ENSP00000273047,9606.ENSP00000274289,9606.ENSP00000281708,9606.ENSP00000285071,9606.ENSP00000296343,…	C12orf5,SIRT1,XBP1,HMOX1,CHMP4B,RIPK2,MTMR9,TBC1D12,TICAM1,SESN2,MUL1,PIKFYVE,C18orf8,NPC1,RAB5A,PLK2,FBXW7,FLCN,KIAA0226,TSC1,TLK2,RAB12,ATG101,RNF41,WAC,UVRAG,MTCL1,MTOR,SMURF1,EXOC8,MCL1,PLK3,RRAGC,ZC3H12A,TP53INP2,PIM2,PIP4K2A,TBC1D25,OPTN,MTMR3,SH3BP4,HERC1,SCFD1,ABL2,ATP6V0B,USP36,DAPK3,C9orf72,IKBKG
GO:0022613	ribonucleoprotein complex biogenesis	64	409	0.24	0.0021	9606.ENSP00000198767,9606.ENSP00000199320,9606.ENSP00000212015,9606.ENSP00000220592,9606.ENSP00000224140,9606.ENSP00000230340,9606.ENSP00000244230,9606.ENSP00000254605,9606.ENSP00000256383,9606.ENSP00000258243,9606.ENSP00000261708,9606.ENSP00000265245,9606.ENSP00000268483,9606.ENSP00000273541,9606.ENSP00000280614,9606.ENSP00000283109,9606.ENSP00000296792,9606.ENSP00000297990,9606.ENSP00000298552,…	RRN3,DIMT1,SIRT1,AGO2,SETX,BYSL,MPHOSPH10,RRP8,EIF2S1,URB2,UTP6,LSG1,TXNL4B,ISY1,CCRN4L,RIOK2,UTP15,NOL6,TSC1,ISG20,UTP23,ZNF622,WDR75,PRPF3,PRMT5,EDC3,RPUSD2,ISG20L2,CIRH1A,HSP90AA1,RRP1B,YTHDC1,RIOK3,CPSF7,PRPF39,DYNC1H1,WDR37,WDR55,LTV1,KIAA0907,EIF3A,MDN1,PDCD11,PTBP2,DDX31,AGO3,AAR2,TEX10,PAK1IP1,RIOK1,SMN1,TAF9,NOP2,ATXN2L,DDX51,SETD4,WDR43,CHD7,EXOSC6,CLP1,CELF1,NOL8,MPV17L2,C9orf72
GO:0071840	cellular component organization or biogenesis	561	5342	0.06	0.0021	9606.ENSP00000009041,9606.ENSP00000053468,9606.ENSP00000056217,9606.ENSP00000163416,9606.ENSP00000164024,9606.ENSP00000164227,9606.ENSP00000198767,9606.ENSP00000199320,9606.ENSP00000200453,9606.ENSP00000202556,9606.ENSP00000212015,9606.ENSP00000215904,9606.ENSP00000216037,9606.ENSP00000216117,9606.ENSP00000216267,9606.ENSP00000216489,9606.ENSP00000217402,9606.ENSP00000218176,9606.ENSP00000220325,…	STARD3NL,MRPS10,ARHGEF5,GOLGA5,CELSR3,BCL3,RRN3,DIMT1,PPP1R15A,PPP1R13B,SIRT1,PDXP,XBP1,HMOX1,BRD1,ALKBH1,CHMP4B,KCND1,EHD4,VPS18,AGO2,BRF2,SGTA,BET1,SERPINE1,YKT6,SETX,PPIF,PRDM4,RAB35,GCLC,BYSL,BNIP1,GORASP2,PRDM2,CAMSAP2,RHOQ,KALRN,EGR2,SNAI1,MPHOSPH10,EREG,C3,PLAGL2,RAF1,NUMBL,SESN2,GRWD1,DNHD1,RRP8,TIMM10B,H3F3B,KDM6B,IGHMBP2,USPL1,ACTR3B,EIF2S1,MBD2,ADAM19,URB2,COG3,KIAA0368,TOR1B,RIPK1,SDC…
GO:0051403	stress-activated MAPK cascade	25	107	0.41	0.0022	9606.ENSP00000013125,9606.ENSP00000220751,9606.ENSP00000226574,9606.ENSP00000256458,9606.ENSP00000259808,9606.ENSP00000263056,9606.ENSP00000263881,9606.ENSP00000264198,9606.ENSP00000265026,9606.ENSP00000304501,9606.ENSP00000312150,9606.ENSP00000345083,9606.ENSP00000356070,9606.ENSP00000359206,9606.ENSP00000359424,9606.ENSP00000360683,9606.ENSP00000370104,9606.ENSP00000410402,9606.ENSP00000423550,…	MAP4K5,RIPK2,NFKB1,IRAK2,RIPK1,MAP3K8,MAP4K3,MUL1,MAP3K13,ADORA2B,TRIB1,MAP2K3,MAPKAPK2,BTRC,CHUK,PTPN1,GPS2,MAP2K4,CSB-PGBD3,CRYAB,TRAF6,UBC,MAP3K9,ZFP36,IKBKG
GO:0006396	RNA processing	111	825	0.17	0.0023	9606.ENSP00000170564,9606.ENSP00000199320,9606.ENSP00000212015,9606.ENSP00000216038,9606.ENSP00000216252,9606.ENSP00000216489,9606.ENSP00000217109,9606.ENSP00000220592,9606.ENSP00000224140,9606.ENSP00000230340,9606.ENSP00000244230,9606.ENSP00000251636,9606.ENSP00000254605,9606.ENSP00000257181,9606.ENSP00000261708,9606.ENSP00000262710,9606.ENSP00000265963,9606.ENSP00000267287,9606.ENSP00000268483,…	GPATCH1,DIMT1,SIRT1,RTCB,PHF5A,ALKBH1,CSTF1,AGO2,SETX,BYSL,MPHOSPH10,DHX29,RRP8,PRPF38A,UTP6,ACIN1,GTF2H1,MBNL2,TXNL4B,ISY1,CDKAL1,CCRN4L,RIOK2,U2AFBP,CCNL1,SNIP1,UTP15,RP9,NOL6,PCF11,SF3B3,DDX19A,ISG20,UTP23,PDE12,INTS6,TRMT10C,WDR75,PRMT9,PRPF3,RBBP6,SUPT6H,PRMT5,LSM10,RPUSD2,ISG20L2,AKAP17A,KARS,CIRH1A,INTS5,DHX34,SMAD3,RRP1B,YTHDC1,RIOK3,PSPC1,CPSF7,PRPF39,PPP4R2,PIWIL2,WDR37,WDR55,WTAP,SUPV3…
GO:0043123	positive regulation of I-kappaB kinase/NF-kappaB signaling	27	122	0.39	0.0025	9606.ENSP00000220751,9606.ENSP00000248244,9606.ENSP00000259808,9606.ENSP00000263377,9606.ENSP00000263464,9606.ENSP00000276431,9606.ENSP00000295025,9606.ENSP00000296677,9606.ENSP00000300086,9606.ENSP00000301838,9606.ENSP00000306124,9606.ENSP00000312455,9606.ENSP00000321026,9606.ENSP00000349596,9606.ENSP00000351416,9606.ENSP00000351789,9606.ENSP00000354718,9606.ENSP00000359424,9606.ENSP00000359612,…	RIPK2,TICAM1,RIPK1,BRD4,BIRC3,TNFRSF10B,REL,F2RL1,TERF2IP,FADD,PRKCE,CFLAR,LURAP1L,TRIM38,ANKRD17,PELI1,AKAP13,CHUK,BCL10,PIM2,TRIM5,RELA,TLR6,TRAF6,BIRC2,MAP3K14,IKBKG
GO:0009267	cellular response to starvation	29	137	0.37	0.0028	9606.ENSP00000212015,9606.ENSP00000216037,9606.ENSP00000253063,9606.ENSP00000254605,9606.ENSP00000256383,9606.ENSP00000262039,9606.ENSP00000266458,9606.ENSP00000304004,9606.ENSP00000306682,9606.ENSP00000307235,9606.ENSP00000307260,9606.ENSP00000324173,9606.ENSP00000326119,9606.ENSP00000330032,9606.ENSP00000339191,9606.ENSP00000339881,9606.ENSP00000344352,9606.ENSP00000354558,9606.ENSP00000356125,…	SIRT1,XBP1,SESN2,RRP8,EIF2S1,PIK3C3,GABARAPL1,FOXA3,PPM1D,EIF2AK3,TBL2,HSPA5,PMAIP1,UPP1,CAV1,MIOS,ATF3,MTOR,NUAK2,JUN,RRAGC,ZC3H12A,NFE2L2,MTMR3,CDKN1A,CADPS2,FNIP1,ZFYVE1,BHLHA15
GO:0070646	protein modification by small protein removal	49	290	0.27	0.0028	9606.ENSP00000171111,9606.ENSP00000216039,9606.ENSP00000216797,9606.ENSP00000219313,9606.ENSP00000255304,9606.ENSP00000259808,9606.ENSP00000260187,9606.ENSP00000261712,9606.ENSP00000263202,9606.ENSP00000263464,9606.ENSP00000264639,9606.ENSP00000282344,9606.ENSP00000284274,9606.ENSP00000296257,9606.ENSP00000303706,9606.ENSP00000306528,9606.ENSP00000308022,9606.ENSP00000309163,9606.ENSP00000316357,…	KEAP1,JOSD1,NFKBIA,PSMD7,USPL1,RIPK1,USP2,PSMD11,UFD1L,BIRC3,PSMD3,USP12,OTULIN,SENP2,CDC25A,DESI2,TADA2B,RCE1,USP9X,SIAH2,YOD1,SMAD3,FOXK2,VCP,ZRANB1,INO80,ZC3H12A,OTUD3,UIMC1,STAM,DDX58,STAMBP,USP8,USP25,ASXL2,PSME4,CYLD,USP53,TRAF6,NFRKB,ATXN7,USP36,UBC,TRAF3,OTUD7B,BIRC2,TNFAIP3,IKBKG,C17orf96
GO:0016579	protein deubiquitination	47	275	0.27	0.003	9606.ENSP00000171111,9606.ENSP00000216039,9606.ENSP00000216797,9606.ENSP00000219313,9606.ENSP00000259808,9606.ENSP00000260187,9606.ENSP00000261712,9606.ENSP00000263202,9606.ENSP00000263464,9606.ENSP00000264639,9606.ENSP00000282344,9606.ENSP00000284274,9606.ENSP00000303706,9606.ENSP00000306528,9606.ENSP00000308022,9606.ENSP00000309163,9606.ENSP00000316357,9606.ENSP00000322457,9606.ENSP00000326813,…	KEAP1,JOSD1,NFKBIA,PSMD7,RIPK1,USP2,PSMD11,UFD1L,BIRC3,PSMD3,USP12,OTULIN,CDC25A,DESI2,TADA2B,RCE1,USP9X,SIAH2,YOD1,SMAD3,FOXK2,VCP,ZRANB1,INO80,ZC3H12A,OTUD3,UIMC1,STAM,DDX58,STAMBP,USP8,USP25,ASXL2,PSME4,CYLD,USP53,TRAF6,NFRKB,ATXN7,USP36,UBC,TRAF3,OTUD7B,BIRC2,TNFAIP3,IKBKG,C17orf96
GO:0031349	positive regulation of defense response	58	365	0.24	0.003	9606.ENSP00000216797,9606.ENSP00000220751,9606.ENSP00000221452,9606.ENSP00000223095,9606.ENSP00000226574,9606.ENSP00000229332,9606.ENSP00000244869,9606.ENSP00000245907,9606.ENSP00000248244,9606.ENSP00000251849,9606.ENSP00000256458,9606.ENSP00000259808,9606.ENSP00000262039,9606.ENSP00000262510,9606.ENSP00000262640,9606.ENSP00000278568,9606.ENSP00000284274,9606.ENSP00000293328,9606.ENSP00000296677,…	NFKBIA,RIPK2,RELB,SERPINE1,NFKB1,CLEC4A,EREG,C3,TICAM1,RAF1,IRAK2,RIPK1,PIK3C3,NLRC5,VAMP7,PAK1,OTULIN,STAT5B,F2RL1,HSP90B1,FADD,IL12A,ADORA2B,PRKCE,MALT1,KARS,POLR3C,CAV1,RIOK3,PSPC1,ANKRD17,PELI1,MAPKAPK2,CHUK,BCL10,HSPA1B,HLA-E,OPTN,DDX58,TRIM5,RSAD2,ETS1,AP1G1,POLR3D,RELA,TLR6,CYLD,PVR,MUC20,MUC4,TRAF6,UBC,LDLR,TRAF3,RPS6KA5,ITCH,TNFAIP3,IKBKG
GO:0036499	PERK-mediated unfolded protein response	8	12	0.87	0.003	9606.ENSP00000256383,9606.ENSP00000306512,9606.ENSP00000307235,9606.ENSP00000324173,9606.ENSP00000344352,9606.ENSP00000380252,9606.ENSP00000409555,9606.ENSP00000448665	EIF2S1,CXCL8,EIF2AK3,HSPA5,ATF3,NFE2L2,HERPUD1,DDIT3
GO:0042035	regulation of cytokine biosynthetic process	23	96	0.42	0.003	9606.ENSP00000164227,9606.ENSP00000216117,9606.ENSP00000226574,9606.ENSP00000239938,9606.ENSP00000244869,9606.ENSP00000245414,9606.ENSP00000248244,9606.ENSP00000260356,9606.ENSP00000263339,9606.ENSP00000264607,9606.ENSP00000293328,9606.ENSP00000305422,9606.ENSP00000345083,9606.ENSP00000356070,9606.ENSP00000359612,9606.ENSP00000363804,9606.ENSP00000366702,9606.ENSP00000371634,9606.ENSP00000384273,…	BCL3,HMOX1,NFKB1,EGR1,EREG,IRF1,TICAM1,THBS1,IL1A,ASB1,STAT5B,CEBPB,MAP2K3,MAPKAPK2,BCL10,KLF4,ERRFI1,IGF2BP2,RELA,TLR6,TRAF6,UBE2J1,ZFP36
GO:1903322	positive regulation of protein modification by small protein conjugation or removal	28	131	0.37	0.0031	9606.ENSP00000220751,9606.ENSP00000248244,9606.ENSP00000260247,9606.ENSP00000263464,9606.ENSP00000264198,9606.ENSP00000265138,9606.ENSP00000268042,9606.ENSP00000281708,9606.ENSP00000296257,9606.ENSP00000313681,9606.ENSP00000314733,9606.ENSP00000319279,9606.ENSP00000319482,9606.ENSP00000321239,9606.ENSP00000324173,9606.ENSP00000338019,9606.ENSP00000339191,9606.ENSP00000349547,9606.ENSP00000351777,…	RIPK2,TICAM1,DCUN1D5,BIRC3,MUL1,ARRDC3,ARRDC4,FBXW7,SENP2,SPHK1,TOLLIP,MALT1,DCUN1D3,RCHY1,HSPA5,DNAJB2,CAV1,RASSF1,VCP,PELI1,TOPORS,CTR9,BCL10,ZC3H12A,DCUN1D2,TRAF6,RNF111,BIRC2
GO:0007346	regulation of mitotic cell cycle	86	608	0.19	0.0032	9606.ENSP00000013125,9606.ENSP00000209728,9606.ENSP00000212015,9606.ENSP00000215904,9606.ENSP00000217402,9606.ENSP00000239223,9606.ENSP00000244869,9606.ENSP00000252992,9606.ENSP00000254250,9606.ENSP00000260130,9606.ENSP00000260187,9606.ENSP00000260372,9606.ENSP00000261254,9606.ENSP00000263056,9606.ENSP00000263339,9606.ENSP00000263377,9606.ENSP00000263620,9606.ENSP00000263881,9606.ENSP00000270162,…	MAP4K5,CDC6,SIRT1,PDXP,CHMP4B,DUSP1,EREG,CEP85,THAP1,SDCBP,USP2,HAUS2,CCND2,MAP3K8,IL1A,BRD4,ARID3A,MAP4K3,SIK1,DYNC1LI1,PLK2,CDKN2B,PAK1,ORAOV1,RIOK2,NSMCE2,BTG2,STAT5B,TGFA,SENP2,TUBA1A,CDK2AP2,YWHAG,MEPCE,ADAM17,SPHK1,PINX1,PRMT5,LSM10,DCUN1D3,PDGFB,SMAD3,HSP90AA1,OVOL1,SFN,MCPH1,OFD1,BTG3,MAP2K3,DYNC1H1,ANKRD17,PLAGL1,PIM3,CDC14A,INO80,SLK,GBF1,GADD45A,PLK3,PIM1,KLF4,HSPA1B,PIM2,RGCC,EDN1,NKX…
GO:0030162	regulation of proteolysis	101	742	0.18	0.0032	9606.ENSP00000158771,9606.ENSP00000171111,9606.ENSP00000185150,9606.ENSP00000212015,9606.ENSP00000216037,9606.ENSP00000220751,9606.ENSP00000221566,9606.ENSP00000223095,9606.ENSP00000229416,9606.ENSP00000245907,9606.ENSP00000250457,9606.ENSP00000251849,9606.ENSP00000256497,9606.ENSP00000257787,9606.ENSP00000259808,9606.ENSP00000260130,9606.ENSP00000260356,9606.ENSP00000260442,9606.ENSP00000262384,…	DERL2,KEAP1,ERLEC1,SIRT1,XBP1,RIPK2,SGTA,SERPINE1,GCLC,C3,EGLN3,RAF1,EDEM1,AKIRIN2,RIPK1,SDCBP,THBS1,BCL2L10,N4BP1,BIRC3,MUL1,LEF1,PLK2,DLC1,TNFRSF10B,BTBD11,FBXW7,SH3RF1,NSMCE2,PCOLCE2,FADD,RNF139,EIF2AK3,CYCS,TNFRSF10D,TRIB1,CFLAR,DAB2,KLHL11,ZFAND2A,CLU,TLK2,RCHY1,SIAH2,KARS,RNF166,PMAIP1,YOD1,CLN8,SMAD3,DNAJB2,CAV1,PLAUR,SFN,NRD1,WAC,VCP,DDA1,SMURF1,LRIG2,CTGF,EFNA1,ECM1,BTRC,BCL10,LONRF3,PLK…
GO:0002758	innate immune response-activating signal transduction	33	168	0.34	0.0033	9606.ENSP00000216797,9606.ENSP00000220751,9606.ENSP00000221452,9606.ENSP00000226574,9606.ENSP00000229332,9606.ENSP00000248244,9606.ENSP00000251849,9606.ENSP00000256458,9606.ENSP00000259808,9606.ENSP00000262039,9606.ENSP00000278568,9606.ENSP00000284274,9606.ENSP00000299767,9606.ENSP00000301838,9606.ENSP00000306124,9606.ENSP00000319279,9606.ENSP00000356070,9606.ENSP00000359424,9606.ENSP00000359612,…	NFKBIA,RIPK2,RELB,NFKB1,CLEC4A,TICAM1,RAF1,IRAK2,RIPK1,PIK3C3,PAK1,OTULIN,HSP90B1,FADD,PRKCE,MALT1,MAPKAPK2,CHUK,BCL10,DDX58,TRIM5,RELA,TLR6,CYLD,MUC20,MUC4,TRAF6,UBC,TRAF3,RPS6KA5,ITCH,TNFAIP3,IKBKG
GO:0050688	regulation of defense response to virus	19	71	0.47	0.0033	9606.ENSP00000252229,9606.ENSP00000263202,9606.ENSP00000263464,9606.ENSP00000264198,9606.ENSP00000282412,9606.ENSP00000327824,9606.ENSP00000331487,9606.ENSP00000341874,9606.ENSP00000342136,9606.ENSP00000349596,9606.ENSP00000351416,9606.ENSP00000354645,9606.ENSP00000362179,9606.ENSP00000369213,9606.ENSP00000376268,9606.ENSP00000454207,9606.ENSP00000477613,9606.ENSP00000480499,9606.ENSP00000481570	MICB,UFD1L,BIRC3,MUL1,PPM1B,IFNLR1,NPLOC4,RIOK3,CREB3,TRIM38,ANKRD17,GPATCH3,ZC3H12A,DDX58,SEC14L1,TRAF3,BIRC2,ITCH,TNFAIP3
GO:0051055	negative regulation of lipid biosynthetic process	15	47	0.55	0.0033	9606.ENSP00000212015,9606.ENSP00000226574,9606.ENSP00000228606,9606.ENSP00000243045,9606.ENSP00000244050,9606.ENSP00000245787,9606.ENSP00000270162,9606.ENSP00000281708,9606.ENSP00000294312,9606.ENSP00000317144,9606.ENSP00000330382,9606.ENSP00000344741,9606.ENSP00000346508,9606.ENSP00000355925,9606.ENSP00000368104	SIRT1,NFKB1,CYP27B1,ORMDL2,SNAI1,INSIG2,SIK1,FBXW7,FGF19,PIBF1,PDGFB,INSIG1,PDGFA,PROX1,BMP2
GO:0071222	cellular response to lipopolysaccharide	30	146	0.35	0.0033	9606.ENSP00000216037,9606.ENSP00000216797,9606.ENSP00000220751,9606.ENSP00000223095,9606.ENSP00000226574,9606.ENSP00000246672,9606.ENSP00000248244,9606.ENSP00000254066,9606.ENSP00000256458,9606.ENSP00000264832,9606.ENSP00000269701,9606.ENSP00000303231,9606.ENSP00000305422,9606.ENSP00000306124,9606.ENSP00000306512,9606.ENSP00000310928,9606.ENSP00000312988,9606.ENSP00000332116,9606.ENSP00000354733,…	XBP1,NFKBIA,RIPK2,SERPINE1,NFKB1,NR1D1,TICAM1,RARA,IRAK2,ICAM1,AKAP8,IL12A,CEBPB,PRKCE,CXCL8,PPARD,NFKBIB,PDE4B,SBNO2,CTR9,ABCC2,ANKRD1,ZC3H12A,PLAA,VIMP,RELA,TRAF6,LITAF,ZFP36,TNFAIP3
GO:0030433	ubiquitin-dependent ERAD pathway	18	65	0.48	0.0034	9606.ENSP00000158771,9606.ENSP00000185150,9606.ENSP00000221566,9606.ENSP00000237455,9606.ENSP00000249356,9606.ENSP00000256497,9606.ENSP00000259335,9606.ENSP00000261942,9606.ENSP00000299767,9606.ENSP00000324173,9606.ENSP00000326813,9606.ENSP00000331487,9606.ENSP00000338019,9606.ENSP00000351777,9606.ENSP00000366395,9606.ENSP00000381282,9606.ENSP00000383719,9606.ENSP00000451261	DERL2,ERLEC1,SGTA,RNF103,DNAJB9,EDEM1,KIAA0368,FAF2,HSP90B1,HSPA5,YOD1,NPLOC4,DNAJB2,VCP,SYVN1,VIMP,UBE2J2,UBE2J1
GO:0034599	cellular response to oxidative stress	40	222	0.3	0.0034	9606.ENSP00000212015,9606.ENSP00000216037,9606.ENSP00000216117,9606.ENSP00000220659,9606.ENSP00000221130,9606.ENSP00000224140,9606.ENSP00000225174,9606.ENSP00000253063,9606.ENSP00000254846,9606.ENSP00000256383,9606.ENSP00000262198,9606.ENSP00000272233,9606.ENSP00000300574,9606.ENSP00000306245,9606.ENSP00000307786,9606.ENSP00000310042,9606.ENSP00000312455,9606.ENSP00000344479,9606.ENSP00000347134,…	SIRT1,XBP1,HMOX1,BRF2,GSR,SETX,PPIF,SESN2,KDM6B,EIF2S1,ADNP2,RHOB,CRK,FOS,CYCS,ZNF622,CFLAR,NR4A2,NET1,GLRX2,CHUK,JUN,ZC3H12A,ADPRHL2,KLF4,HSPA1B,SRXN1,GPX3,ETS1,SLC11A2,NFE2L2,VIMP,RELA,ARNTL,FOXO3,PNPT1,TXNRD1,ATP2A2,CPEB2,TNFAIP3
GO:2001237	negative regulation of extrinsic apoptotic signaling pathway	24	104	0.4	0.0034	9606.ENSP00000216117,9606.ENSP00000223095,9606.ENSP00000229416,9606.ENSP00000251849,9606.ENSP00000259808,9606.ENSP00000260356,9606.ENSP00000263339,9606.ENSP00000263640,9606.ENSP00000264832,9606.ENSP00000265371,9606.ENSP00000276431,9606.ENSP00000284637,9606.ENSP00000301838,9606.ENSP00000312455,9606.ENSP00000322457,9606.ENSP00000357055,9606.ENSP00000358022,9606.ENSP00000359258,9606.ENSP00000362978,…	HMOX1,SERPINE1,GCLC,RAF1,RIPK1,THBS1,IL1A,ACVR1,ICAM1,NRP1,TNFRSF10B,SH3RF1,FADD,CFLAR,SIAH2,PEA15,MCL1,GCLM,EYA3,HSPA1B,SGK3,RELA,BIRC6,TNFAIP3
GO:0032436	positive regulation of proteasomal ubiquitin-dependent protein catabolic process	22	91	0.43	0.0035	9606.ENSP00000171111,9606.ENSP00000216037,9606.ENSP00000221566,9606.ENSP00000229416,9606.ENSP00000274289,9606.ENSP00000287437,9606.ENSP00000312150,9606.ENSP00000313391,9606.ENSP00000314619,9606.ENSP00000315130,9606.ENSP00000321239,9606.ENSP00000326095,9606.ENSP00000338019,9606.ENSP00000339191,9606.ENSP00000351777,9606.ENSP00000360690,9606.ENSP00000361275,9606.ENSP00000362555,9606.ENSP00000380044,…	KEAP1,XBP1,SGTA,GCLC,PLK2,NSMCE2,TRIB1,DAB2,ZFAND2A,CLU,RCHY1,RNF166,DNAJB2,CAV1,VCP,LONRF3,PLK3,RNF19B,CSNK1E,NFE2L2,LONRF1,HERPUD1
GO:1903364	positive regulation of cellular protein catabolic process	30	147	0.35	0.0036	9606.ENSP00000171111,9606.ENSP00000216037,9606.ENSP00000221566,9606.ENSP00000229416,9606.ENSP00000256497,9606.ENSP00000274289,9606.ENSP00000281708,9606.ENSP00000287437,9606.ENSP00000304051,9606.ENSP00000312150,9606.ENSP00000313391,9606.ENSP00000314619,9606.ENSP00000315130,9606.ENSP00000321239,9606.ENSP00000326095,9606.ENSP00000335153,9606.ENSP00000338019,9606.ENSP00000339191,9606.ENSP00000351777,…	KEAP1,XBP1,SGTA,GCLC,EDEM1,PLK2,FBXW7,NSMCE2,RNF139,TRIB1,DAB2,ZFAND2A,CLU,RCHY1,RNF166,HSP90AA1,DNAJB2,CAV1,VCP,SMURF1,LONRF3,PLK3,RNF19B,CSNK1E,NFE2L2,LONRF1,RDX,HERPUD1,LDLR,TNFAIP3
GO:0034660	ncRNA metabolic process	73	497	0.21	0.0037	9606.ENSP00000199320,9606.ENSP00000212015,9606.ENSP00000216038,9606.ENSP00000216294,9606.ENSP00000216489,9606.ENSP00000220592,9606.ENSP00000230340,9606.ENSP00000230771,9606.ENSP00000237853,9606.ENSP00000244230,9606.ENSP00000254605,9606.ENSP00000261708,9606.ENSP00000262809,9606.ENSP00000264157,9606.ENSP00000274311,9606.ENSP00000274695,9606.ENSP00000283109,9606.ENSP00000283875,9606.ENSP00000285814,…	DIMT1,SIRT1,RTCB,SNAPC1,ALKBH1,AGO2,BYSL,HARS2,ELL2,MPHOSPH10,RRP8,UTP6,ELL,CCNT2,PELO,CDKAL1,RIOK2,GTF2E1,NIFK,ICE1,UTP15,NOL6,SNAPC4,ISG20,UTP23,MEPCE,INTS6,TRMT10C,WDR75,PLD6,FARSA,RPUSD2,ISG20L2,KARS,CIRH1A,INTS5,SMAD3,TARSL2,RRP1B,RIOK3,PIWIL2,PTRF,WDR37,WDR55,MDN1,PDCD11,TOE1,YRDC,AGO3,TEX10,ZCCHC6,RIOK1,TAF9,NOP2,TRMT44,ZNF143,DDX51,WDR43,POP1,TARS,CTU1,CHD7,EXOSC6,AARSD1,NABP1,INTS12,THUM…
GO:0032479	regulation of type I interferon production	25	112	0.39	0.0038	9606.ENSP00000220751,9606.ENSP00000221452,9606.ENSP00000226574,9606.ENSP00000245414,9606.ENSP00000248244,9606.ENSP00000262510,9606.ENSP00000263202,9606.ENSP00000282412,9606.ENSP00000295025,9606.ENSP00000331487,9606.ENSP00000334564,9606.ENSP00000341874,9606.ENSP00000349596,9606.ENSP00000354645,9606.ENSP00000358983,9606.ENSP00000359424,9606.ENSP00000361446,9606.ENSP00000369213,9606.ENSP00000380904,…	RIPK2,RELB,NFKB1,IRF1,TICAM1,NLRC5,UFD1L,PPM1B,REL,NPLOC4,POLR3C,RIOK3,TRIM38,GPATCH3,NFKB2,CHUK,POLR3A,DDX58,POLR3D,RELA,SETD2,CYLD,TRAF3,ITCH,TNFAIP3
GO:0036294	cellular response to decreased oxygen levels	30	148	0.35	0.0039	9606.ENSP00000179259,9606.ENSP00000212015,9606.ENSP00000216117,9606.ENSP00000239938,9606.ENSP00000250457,9606.ENSP00000261523,9606.ENSP00000263980,9606.ENSP00000264033,9606.ENSP00000264832,9606.ENSP00000297991,9606.ENSP00000298552,9606.ENSP00000306124,9606.ENSP00000307260,9606.ENSP00000310928,9606.ENSP00000312455,9606.ENSP00000326119,9606.ENSP00000327801,9606.ENSP00000354558,9606.ENSP00000360762,…	C12orf5,SIRT1,HMOX1,EGR1,EGLN3,RORA,SLC9A1,CBL,ICAM1,AQP3,TSC1,PRKCE,TBL2,PPARD,CFLAR,PMAIP1,P4HB,MTOR,ANKRD1,PLK3,RGCC,EDN1,NKX3-1,NFE2L2,BACH1,HIPK2,FOXO3,UBC,CPEB2,CITED2
GO:0000209	protein polyubiquitination	42	240	0.28	0.004	9606.ENSP00000237281,9606.ENSP00000247977,9606.ENSP00000256257,9606.ENSP00000264033,9606.ENSP00000281708,9606.ENSP00000282369,9606.ENSP00000301712,9606.ENSP00000304051,9606.ENSP00000306906,9606.ENSP00000317872,9606.ENSP00000320898,9606.ENSP00000322457,9606.ENSP00000323687,9606.ENSP00000326095,9606.ENSP00000330221,9606.ENSP00000342755,9606.ENSP00000347836,9606.ENSP00000349298,9606.ENSP00000349596,…	FBXO30,FBXL12,RNF122,CBL,FBXW7,TRIM36,UNKL,RNF139,RNF181,RBBP6,RNF168,SIAH2,UBE2O,RNF166,SPSB1,RNF41,UBE2H,MYLIP,TRIM38,PELI1,TOPORS,SMURF1,BTRC,TNKS2,LONRF3,RNF19B,SYVN1,TRIM5,FBXL18,UBE2E2,LONRF1,NEDD4L,UBE2J2,RNF4,UBR5,LMO7,TRAF6,UBC,RNF111,BIRC2,ITCH,TNFAIP3
GO:0043406	positive regulation of MAP kinase activity	45	264	0.27	0.004	9606.ENSP00000013125,9606.ENSP00000056217,9606.ENSP00000215631,9606.ENSP00000220751,9606.ENSP00000251849,9606.ENSP00000252809,9606.ENSP00000256458,9606.ENSP00000259808,9606.ENSP00000260356,9606.ENSP00000263056,9606.ENSP00000263881,9606.ENSP00000264198,9606.ENSP00000265026,9606.ENSP00000278568,9606.ENSP00000282397,9606.ENSP00000288602,9606.ENSP00000295400,9606.ENSP00000300574,9606.ENSP00000304501,…	MAP4K5,ARHGEF5,GADD45B,RIPK2,RAF1,GDF15,IRAK2,RIPK1,THBS1,MAP3K8,MAP4K3,MUL1,MAP3K13,PAK1,FLT1,BRAF,TGFA,CRK,ADORA2B,DVL3,KARS,PDGFB,MAP2K3,PDGFA,AKAP13,MAPKAPK2,PEA15,DUSP5,AVPI1,GADD45A,PTPN1,RAPGEF1,DKK1,BMP2,EDN1,TLR6,SHC1,MAP2K4,MUC20,CSB-PGBD3,TRAF6,UBC,MAP3K9,MAP3K14,IKBKG
GO:0043434	response to peptide hormone	57	362	0.24	0.004	9606.ENSP00000209728,9606.ENSP00000212015,9606.ENSP00000216037,9606.ENSP00000226574,9606.ENSP00000229416,9606.ENSP00000238738,9606.ENSP00000239938,9606.ENSP00000242480,9606.ENSP00000244869,9606.ENSP00000245787,9606.ENSP00000252818,9606.ENSP00000253063,9606.ENSP00000256015,9606.ENSP00000263805,9606.ENSP00000263980,9606.ENSP00000264832,9606.ENSP00000265643,9606.ENSP00000266126,9606.ENSP00000278568,…	CDC6,SIRT1,XBP1,NFKB1,GCLC,RHOQ,EGR1,EGR2,EREG,INSIG2,JUND,SESN2,BTG1,ZNF106,SLC9A1,ICAM1,GAL,EIF2B2,PAK1,QDPR,BTG2,STAT5B,TSC1,CRK,SLC25A33,YWHAG,CFLAR,NDEL1,CAV1,NR4A2,ENPP1,MTOR,CTGF,ABCC2,SORBS1,PTPN1,IRS2,ERRFI1,EDN1,NFE2L2,VIMP,GRB10,MYO5A,RELA,CREB1,BCAR1,EIF2B4,LPIN1,PNPT1,SHC1,ATP6V0B,ADM,NR4A1,CPEB2,TRIM16,NR4A3,SOCS7
GO:0044092	negative regulation of molecular function	141	1119	0.14	0.004	9606.ENSP00000014914,9606.ENSP00000171111,9606.ENSP00000200453,9606.ENSP00000212015,9606.ENSP00000215631,9606.ENSP00000216117,9606.ENSP00000216797,9606.ENSP00000218516,9606.ENSP00000223095,9606.ENSP00000225174,9606.ENSP00000226574,9606.ENSP00000228515,9606.ENSP00000228606,9606.ENSP00000230321,9606.ENSP00000235382,9606.ENSP00000239223,9606.ENSP00000240100,9606.ENSP00000244230,9606.ENSP00000245907,…	GPRC5A,KEAP1,PPP1R15A,SIRT1,GADD45B,HMOX1,NFKBIA,GLA,SERPINE1,PPIF,NFKB1,CSRNP2,CYP27B1,MDFI,RGS2,DUSP1,DUSP4,MPHOSPH10,C3,KIAA1244,RAF1,CEP85,ZCCHC9,EIF2S1,IRAK2,BHLHE40,THBS1,FAF2,TMED2,TRIM37,NLRC5,ELL,BIRC3,CBL,LEF1,BTAF1,SIK1,NFKBIE,TNFRSF10B,CDKN2B,UBASH3B,OTULIN,SH3RF1,PRKAG2,DUSP2,SENP2,KIAA0226,ANXA5,LMTK2,GEM,TSC1,DUSP16,MIDN,ANGPTL4,IBTK,PRKCE,YWHAG,MEPCE,ZNF431,BOD1,TNFRSF10D,TRIB1,AO…
GO:0071219	cellular response to molecule of bacterial origin	31	156	0.34	0.0041	9606.ENSP00000216037,9606.ENSP00000216797,9606.ENSP00000220751,9606.ENSP00000223095,9606.ENSP00000226574,9606.ENSP00000246672,9606.ENSP00000248244,9606.ENSP00000254066,9606.ENSP00000256458,9606.ENSP00000264832,9606.ENSP00000269701,9606.ENSP00000303231,9606.ENSP00000305422,9606.ENSP00000306124,9606.ENSP00000306512,9606.ENSP00000310928,9606.ENSP00000312988,9606.ENSP00000332116,9606.ENSP00000354733,…	XBP1,NFKBIA,RIPK2,SERPINE1,NFKB1,NR1D1,TICAM1,RARA,IRAK2,ICAM1,AKAP8,IL12A,CEBPB,PRKCE,CXCL8,PPARD,NFKBIB,PDE4B,SBNO2,CTR9,ABCC2,ANKRD1,ZC3H12A,PLAA,VIMP,RELA,TLR6,TRAF6,LITAF,ZFP36,TNFAIP3
GO:0030308	negative regulation of cell growth	32	164	0.33	0.0043	9606.ENSP00000212015,9606.ENSP00000216629,9606.ENSP00000228606,9606.ENSP00000235382,9606.ENSP00000253063,9606.ENSP00000256015,9606.ENSP00000264198,9606.ENSP00000265342,9606.ENSP00000265371,9606.ENSP00000265643,9606.ENSP00000273668,9606.ENSP00000278568,9606.ENSP00000285071,9606.ENSP00000310928,9606.ENSP00000319482,9606.ENSP00000325414,9606.ENSP00000332973,9606.ENSP00000338019,9606.ENSP00000349616,…	SIRT1,BDKRB1,CYP27B1,RGS2,SESN2,BTG1,MUL1,FSTL4,NRP1,GAL,EAF2,PAK1,FLCN,PPARD,DCUN1D3,SERTAD3,SMAD3,DNAJB2,ADIPOR2,MAP2,ENPP1,OSGIN1,TSPYL2,HSPA1B,ING1,BCL6,CDKN1A,SH3BP4,OSGIN2,PPP2CA,CDKN2AIP,CRYAB
GO:0071453	cellular response to oxygen levels	32	164	0.33	0.0043	9606.ENSP00000179259,9606.ENSP00000212015,9606.ENSP00000216117,9606.ENSP00000239938,9606.ENSP00000250457,9606.ENSP00000261523,9606.ENSP00000263980,9606.ENSP00000264033,9606.ENSP00000264832,9606.ENSP00000292114,9606.ENSP00000297991,9606.ENSP00000298552,9606.ENSP00000306124,9606.ENSP00000307260,9606.ENSP00000310928,9606.ENSP00000312455,9606.ENSP00000326119,9606.ENSP00000327801,9606.ENSP00000339191,…	C12orf5,SIRT1,HMOX1,EGR1,EGLN3,RORA,SLC9A1,CBL,ICAM1,TMEM199,AQP3,TSC1,PRKCE,TBL2,PPARD,CFLAR,PMAIP1,P4HB,CAV1,MTOR,ANKRD1,PLK3,RGCC,EDN1,NKX3-1,NFE2L2,BACH1,HIPK2,FOXO3,UBC,CPEB2,CITED2
GO:0002753	cytoplasmic pattern recognition receptor signaling pathway	12	32	0.62	0.0044	9606.ENSP00000216797,9606.ENSP00000220751,9606.ENSP00000256458,9606.ENSP00000284274,9606.ENSP00000369213,9606.ENSP00000384273,9606.ENSP00000392025,9606.ENSP00000433623,9606.ENSP00000441543,9606.ENSP00000480499,9606.ENSP00000481570,9606.ENSP00000483825	NFKBIA,RIPK2,IRAK2,OTULIN,DDX58,RELA,CYLD,TRAF6,UBC,ITCH,TNFAIP3,IKBKG
GO:0016241	regulation of macroautophagy	31	157	0.34	0.0044	9606.ENSP00000179259,9606.ENSP00000212015,9606.ENSP00000216117,9606.ENSP00000217402,9606.ENSP00000220751,9606.ENSP00000225235,9606.ENSP00000253063,9606.ENSP00000264380,9606.ENSP00000269228,9606.ENSP00000273047,9606.ENSP00000296343,9606.ENSP00000298552,9606.ENSP00000331748,9606.ENSP00000338990,9606.ENSP00000342755,9606.ENSP00000346986,9606.ENSP00000348455,9606.ENSP00000354558,9606.ENSP00000354621,…	C12orf5,SIRT1,HMOX1,CHMP4B,RIPK2,TBC1D12,SESN2,PIKFYVE,NPC1,RAB5A,KIAA0226,TSC1,RAB12,ATG101,RNF41,WAC,UVRAG,MTOR,SMURF1,EXOC8,RRAGC,PIM2,PIP4K2A,TBC1D25,OPTN,MTMR3,SCFD1,ATP6V0B,USP36,C9orf72,IKBKG
GO:0044419	interspecies interaction between organisms	98	724	0.17	0.0044	9606.ENSP00000212015,9606.ENSP00000216797,9606.ENSP00000217402,9606.ENSP00000220509,9606.ENSP00000221566,9606.ENSP00000227520,9606.ENSP00000232496,9606.ENSP00000234420,9606.ENSP00000248248,9606.ENSP00000252229,9606.ENSP00000259808,9606.ENSP00000262213,9606.ENSP00000263377,9606.ENSP00000264033,9606.ENSP00000264157,9606.ENSP00000264832,9606.ENSP00000265165,9606.ENSP00000267202,9606.ENSP00000268184,…	SIRT1,NFKBIA,CHMP4B,VPS18,SGTA,CCDC86,TUSC2,MSH6,MON1B,MICB,RIPK1,TRAM1,BRD4,CBL,CCNT2,ICAM1,LEF1,VPS37B,CRTC3,NPC1,RAB5A,DYNC1LI1,SLC25A4,FBXW7,GTF2E1,ITGA5,CXCL3,UBAP1,KCTD5,VPS37C,FADD,CXCL8,CFLAR,NUP98,VPS37A,SUPT6H,MMP1,KARS,KPNA7,SMAD3,RRP1B,CAV1,SLC20A2,CREB3,NUP50,TBC1D20,TAP1,SND1,UVRAG,EPHA2,ANKRD17,VCP,NUP214,RAET1L,F11R,EIF3A,RBM15,GBF1,BTRC,JUN,ZC3H12A,UBR4,HSPA1B,SPEN,NMT2,NFX1,DDX5…
GO:0050778	positive regulation of immune response	83	589	0.19	0.0044	9606.ENSP00000212015,9606.ENSP00000216037,9606.ENSP00000216797,9606.ENSP00000220751,9606.ENSP00000221452,9606.ENSP00000226574,9606.ENSP00000229332,9606.ENSP00000234420,9606.ENSP00000244869,9606.ENSP00000245907,9606.ENSP00000248244,9606.ENSP00000251849,9606.ENSP00000252229,9606.ENSP00000254066,9606.ENSP00000256458,9606.ENSP00000259808,9606.ENSP00000261918,9606.ENSP00000262039,9606.ENSP00000262510,…	SIRT1,XBP1,NFKBIA,RIPK2,RELB,NFKB1,CLEC4A,MSH6,EREG,C3,TICAM1,RAF1,MICB,RARA,IRAK2,RIPK1,SEMA7A,PIK3C3,NLRC5,VAMP7,EIF2B2,PAK1,OTULIN,STAT5B,F2RL1,HSP90B1,CRK,FADD,IL12A,ADORA2B,PRKCE,CLCF1,CLU,STX4,MALT1,WIPF2,KARS,NFKBIZ,PDE4B,POLR3C,HSP90AA1,CAV1,RIOK3,PSPC1,ANKRD17,PELI1,MAPKAPK2,CHUK,BCL10,RAPGEF1,ZC3H12A,THEMIS2,HSPA1B,HLA-E,RGCC,DDX58,TRIM5,TEC,CD274,RSAD2,AP1G1,IL4R,POLR3D,RELA,TLR6,BCAR1…
GO:0051092	positive regulation of NF-kappaB transcription factor activity	29	142	0.35	0.0044	9606.ENSP00000220751,9606.ENSP00000226574,9606.ENSP00000248244,9606.ENSP00000256458,9606.ENSP00000259808,9606.ENSP00000262294,9606.ENSP00000264832,9606.ENSP00000265026,9606.ENSP00000295704,9606.ENSP00000300086,9606.ENSP00000301068,9606.ENSP00000312455,9606.ENSP00000313681,9606.ENSP00000315130,9606.ENSP00000319279,9606.ENSP00000332454,9606.ENSP00000349596,9606.ENSP00000358983,9606.ENSP00000359424,…	RIPK2,NFKB1,TICAM1,IRAK2,RIPK1,TRIM37,ICAM1,MAP3K13,RNF25,TERF2IP,RHEBL1,CFLAR,SPHK1,CLU,MALT1,RIPK4,TRIM38,NFKB2,CHUK,BCL10,HSPA1B,TRIM5,RELA,TLR6,TRAF6,UBC,ERC1,RPS6KA5,IKBKG
GO:0070423	nucleotide-binding oligomerization domain containing signaling pathway	11	27	0.65	0.0045	9606.ENSP00000216797,9606.ENSP00000220751,9606.ENSP00000256458,9606.ENSP00000284274,9606.ENSP00000384273,9606.ENSP00000392025,9606.ENSP00000433623,9606.ENSP00000441543,9606.ENSP00000480499,9606.ENSP00000481570,9606.ENSP00000483825	NFKBIA,RIPK2,IRAK2,OTULIN,RELA,CYLD,TRAF6,UBC,ITCH,TNFAIP3,IKBKG
GO:0009617	response to bacterium	79	555	0.2	0.0046	9606.ENSP00000064780,9606.ENSP00000164227,9606.ENSP00000216037,9606.ENSP00000216629,9606.ENSP00000216797,9606.ENSP00000220751,9606.ENSP00000223095,9606.ENSP00000226574,9606.ENSP00000227752,9606.ENSP00000228606,9606.ENSP00000232496,9606.ENSP00000245907,9606.ENSP00000246672,9606.ENSP00000248244,9606.ENSP00000252818,9606.ENSP00000254066,9606.ENSP00000256458,9606.ENSP00000257787,9606.ENSP00000262510,…	RELT,BCL3,XBP1,BDKRB1,NFKBIA,RIPK2,SERPINE1,NFKB1,IL10RA,CYP27B1,TUSC2,C3,NR1D1,TICAM1,JUND,RARA,IRAK2,AKIRIN2,NLRC5,ICAM1,AKAP8,TNFRSF10B,CCRN4L,CA3,FGF19,CXCL3,CXCL5,IL12A,JUNB,CEBPB,PRKCE,FOS,CXCL8,PPM1D,ADAM17,TNFRSF10D,PPARD,TRIB1,NFKBIB,MALT1,PDE4B,CAV1,ANKRD17,PELI1,SBNO2,CTR9,DUSP10,MAPKAPK2,IL6R,NFKB2,CHUK,ABCC2,BCL10,JUN,ANKRD1,ZC3H12A,HLA-E,OPTN,EDN1,SERPINB9,LYST,CXCL1,PLAA,VIMP,TMF1,…
GO:0031348	negative regulation of defense response	34	180	0.32	0.0046	9606.ENSP00000226574,9606.ENSP00000252229,9606.ENSP00000257604,9606.ENSP00000261523,9606.ENSP00000262510,9606.ENSP00000263202,9606.ENSP00000264198,9606.ENSP00000269856,9606.ENSP00000282412,9606.ENSP00000284274,9606.ENSP00000300574,9606.ENSP00000310928,9606.ENSP00000315731,9606.ENSP00000330341,9606.ENSP00000331487,9606.ENSP00000332973,9606.ENSP00000341874,9606.ENSP00000349596,9606.ENSP00000354645,…	NFKB1,MICB,TRAFD1,RORA,NLRC5,UFD1L,MUL1,FEM1A,PPM1B,OTULIN,CRK,PPARD,METRNL,SOCS3,NPLOC4,SMAD3,RIOK3,TRIM38,GPATCH3,DUSP10,ZC3H12A,KLF4,HLA-E,SERPINB9,GPS2,ASH1L,SEC14L1,ETS1,VIMP,MICA,MVK,LDLR,ITCH,TNFAIP3
GO:0072359	circulatory system development	107	807	0.16	0.0046	9606.ENSP00000212015,9606.ENSP00000216037,9606.ENSP00000216117,9606.ENSP00000223095,9606.ENSP00000237937,9606.ENSP00000239938,9606.ENSP00000242057,9606.ENSP00000244050,9606.ENSP00000244869,9606.ENSP00000249075,9606.ENSP00000249749,9606.ENSP00000251849,9606.ENSP00000254066,9606.ENSP00000254846,9606.ENSP00000254958,9606.ENSP00000256429,9606.ENSP00000257527,9606.ENSP00000257566,9606.ENSP00000260356,…	SIRT1,XBP1,HMOX1,SERPINE1,ZFAND5,EGR1,AHR,SNAI1,EREG,LIF,DLL4,RAF1,RARA,KDM6B,JAG1,MBD2,ADAM19,TBX3,THBS1,RORA,TMED2,C19orf10,EPC1,ACVR1,SLC9A1,MCAM,RAPGEF2,LEF1,SRF,NRP1,TRIP11,SIK1,MEF2D,RHOB,DLC1,FBXW7,FLT1,NIPBL,OTULIN,ITGA5,FGF19,SENP2,TSC1,DCTN5,ANGPTL4,JUNB,LUZP1,CXCL8,EIF2AK3,FOSL1,PPARD,HEG1,SPHK1,EGR3,C3orf58,CALR,TNFRSF12A,SOCS3,PDGFB,SMAD3,ARID2,CAV1,PDGFA,NRARP,ADIPOR2,EPHA2,ANKRD17,…
GO:0043410	positive regulation of MAPK cascade	74	512	0.2	0.0048	9606.ENSP00000013125,9606.ENSP00000056217,9606.ENSP00000215631,9606.ENSP00000220751,9606.ENSP00000249075,9606.ENSP00000251849,9606.ENSP00000252809,9606.ENSP00000256458,9606.ENSP00000259808,9606.ENSP00000260130,9606.ENSP00000260356,9606.ENSP00000261918,9606.ENSP00000262395,9606.ENSP00000262947,9606.ENSP00000263056,9606.ENSP00000263881,9606.ENSP00000264198,9606.ENSP00000264431,9606.ENSP00000264711,…	MAP4K5,ARHGEF5,GADD45B,RIPK2,LIF,RAF1,GDF15,IRAK2,RIPK1,SDCBP,THBS1,SEMA7A,TRAF4,C19orf10,MAP3K8,MAP4K3,MUL1,RAPGEF2,DNAJC27,ICAM1,MAP3K13,NRP1,GAREM,PAK1,FBXW7,FLT1,SH3RF1,BRAF,FGF19,TGFA,F2RL1,CRK,ADORA2B,PRKCE,ZNF622,CFLAR,DVL3,KARS,PDGFB,MAP2K3,PDGFA,AKAP13,MAPKAPK2,CTGF,PEA15,EFNA1,IL6R,DUSP5,AVPI1,GADD45A,JUN,PTPN1,RAPGEF1,ZC3H12A,DKK1,SPRY2,BMP2,EDN1,XDH,GCNT2,TRIM5,IGFBP3,GPNMB,HIPK2,TLR6…
GO:0050776	regulation of immune response	114	873	0.16	0.0048	9606.ENSP00000212015,9606.ENSP00000216037,9606.ENSP00000216117,9606.ENSP00000216797,9606.ENSP00000220751,9606.ENSP00000221452,9606.ENSP00000226574,9606.ENSP00000229332,9606.ENSP00000234420,9606.ENSP00000239882,9606.ENSP00000244869,9606.ENSP00000245414,9606.ENSP00000245907,9606.ENSP00000246672,9606.ENSP00000248244,9606.ENSP00000251849,9606.ENSP00000252229,9606.ENSP00000254066,9606.ENSP00000256458,…	SIRT1,XBP1,HMOX1,NFKBIA,RIPK2,RELB,NFKB1,CLEC4A,MSH6,ELF1,EREG,IRF1,C3,NR1D1,TICAM1,RAF1,MICB,RARA,IRAK2,TRAFD1,RIPK1,SEMA7A,PIK3C3,NLRC5,VAMP7,UFD1L,BIRC3,MUL1,ICAM1,EIF2B2,PAK1,OTULIN,IFNGR2,STAT5B,F2RL1,HSP90B1,RUNX1,CRK,FADD,IL12A,ADORA2B,PRKCE,FOS,CLCF1,CLU,STX4,SUPT6H,MALT1,WIPF2,KARS,NFKBIZ,SOCS3,NPLOC4,PDE4B,SMAD3,POLR3C,HSP90AA1,CAV1,NCR3LG1,RIOK3,PSPC1,ANKRD17,PELI1,GPATCH3,DUSP10,MAPKA…
GO:0071396	cellular response to lipid	71	486	0.21	0.0049	9606.ENSP00000216037,9606.ENSP00000216797,9606.ENSP00000220751,9606.ENSP00000223095,9606.ENSP00000224140,9606.ENSP00000226574,9606.ENSP00000242057,9606.ENSP00000246672,9606.ENSP00000248244,9606.ENSP00000251871,9606.ENSP00000254066,9606.ENSP00000256458,9606.ENSP00000261523,9606.ENSP00000262198,9606.ENSP00000262643,9606.ENSP00000264832,9606.ENSP00000265165,9606.ENSP00000269228,9606.ENSP00000269701,…	XBP1,NFKBIA,RIPK2,SERPINE1,SETX,NFKB1,AHR,NR1D1,TICAM1,MED17,RARA,IRAK2,RORA,ADNP2,CCNE1,ICAM1,LEF1,NPC1,AKAP8,IL12A,LRP8,CEBPB,PRKCE,CXCL8,DDIT4,NR1D2,PPARD,CFLAR,NFKBIB,CALR,HMGCS1,PDE4B,NR4A2,INSIG1,PMEPA1,SBNO2,CTR9,ABCC2,ANKRD1,NCOA3,ZC3H12A,GJB3,PIM1,KLF4,KLF9,ERRFI1,EDN1,NKX3-1,ZNF35,USP8,PLAA,MED13,VIMP,RELA,FOXO3,KDM3A,FHL2,CREB1,ATP2B1,NR6A1,RNF4,ABL2,UBR5,TRAF6,NR4A1,LDLR,LITAF,ZFP36,T…
GO:2000379	positive regulation of reactive oxygen species metabolic process	22	94	0.41	0.0049	9606.ENSP00000248244,9606.ENSP00000259808,9606.ENSP00000260356,9606.ENSP00000264832,9606.ENSP00000296677,9606.ENSP00000315130,9606.ENSP00000330382,9606.ENSP00000332973,9606.ENSP00000335153,9606.ENSP00000342755,9606.ENSP00000353032,9606.ENSP00000354558,9606.ENSP00000355133,9606.ENSP00000360025,9606.ENSP00000362179,9606.ENSP00000363804,9606.ENSP00000368683,9606.ENSP00000368727,9606.ENSP00000380252,…	TICAM1,RIPK1,THBS1,ICAM1,F2RL1,CLU,PDGFB,SMAD3,HSP90AA1,RNF41,P2RX4,MTOR,NOS1AP,GADD45A,ZC3H12A,KLF4,EDN1,XDH,NFE2L2,CDKN1A,FOXO3,TLR6
GO:0048199	vesicle targeting, to, from or within Golgi	18	68	0.46	0.005	9606.ENSP00000222547,9606.ENSP00000260643,9606.ENSP00000262139,9606.ENSP00000262225,9606.ENSP00000280551,9606.ENSP00000291574,9606.ENSP00000294179,9606.ENSP00000295400,9606.ENSP00000325827,9606.ENSP00000330945,9606.ENSP00000346139,9606.ENSP00000358071,9606.ENSP00000359000,9606.ENSP00000378721,9606.ENSP00000381823,9606.ENSP00000386651,9606.ENSP00000390783,9606.ENSP00000444850	BET1,PREB,WIPI1,TMED2,SEC24D,TRAPPC10,STX5,TGFA,SEC16A,TMED9,TBC1D20,SEC23IP,GBF1,SEC31A,SEC24A,MCFD2,SCFD1,USO1
GO:0035994	response to muscle stretch	9	18	0.74	0.0051	9606.ENSP00000216797,9606.ENSP00000226574,9606.ENSP00000251849,9606.ENSP00000263980,9606.ENSP00000306245,9606.ENSP00000360266,9606.ENSP00000360762,9606.ENSP00000368683,9606.ENSP00000384273	NFKBIA,NFKB1,RAF1,SLC9A1,FOS,JUN,ANKRD1,EDN1,RELA
GO:0030307	positive regulation of cell growth	31	159	0.33	0.0052	9606.ENSP00000158771,9606.ENSP00000230990,9606.ENSP00000254810,9606.ENSP00000260130,9606.ENSP00000261918,9606.ENSP00000262198,9606.ENSP00000263980,9606.ENSP00000264198,9606.ENSP00000265165,9606.ENSP00000265354,9606.ENSP00000265371,9606.ENSP00000278568,9606.ENSP00000300574,9606.ENSP00000306328,9606.ENSP00000309968,9606.ENSP00000313681,9606.ENSP00000326737,9606.ENSP00000333982,9606.ENSP00000340989,…	DERL2,HBEGF,H3F3B,SDCBP,SEMA7A,ADNP2,SLC9A1,MUL1,LEF1,SRF,NRP1,PAK1,CRK,SLC25A33,ADAM17,SPHK1,TNFRSF12A,NDEL1,SFN,GOLGA4,SUPV3L1,MTOR,SMURF1,INO80,EDN1,CDKL5,TAF9,PLAA,NEDD4L,CDKN2AIP,RPS6KA1
GO:0016050	vesicle organization	51	318	0.25	0.0054	9606.ENSP00000217402,9606.ENSP00000220509,9606.ENSP00000222547,9606.ENSP00000223369,9606.ENSP00000260643,9606.ENSP00000262039,9606.ENSP00000262225,9606.ENSP00000262640,9606.ENSP00000264276,9606.ENSP00000265070,9606.ENSP00000265909,9606.ENSP00000267202,9606.ENSP00000280551,9606.ENSP00000291574,9606.ENSP00000294179,9606.ENSP00000295400,9606.ENSP00000301765,9606.ENSP00000312753,9606.ENSP00000317714,…	CHMP4B,VPS18,BET1,YKT6,PREB,PIK3C3,TMED2,VAMP7,ALS2,GOLPH3,SNX19,VPS37B,SEC24D,TRAPPC10,STX5,TGFA,VPS37C,FAM109B,STX4,VPS37A,CALR,SEC16A,TMED9,STX3,SEC23B,CAV1,TBC1D20,TAP1,UVRAG,EXOC8,RAB32,SEC23IP,GBF1,PI4K2A,STX16,STAM,LYST,SQSTM1,SNX11,AP1G1,SEC31A,USP8,TMF1,SEC24A,MCFD2,AGFG1,CREB1,AP1M1,SCFD1,BLOC1S3,USO1
GO:0048194	Golgi vesicle budding	19	75	0.45	0.0054	9606.ENSP00000222547,9606.ENSP00000260643,9606.ENSP00000262225,9606.ENSP00000265070,9606.ENSP00000280551,9606.ENSP00000291574,9606.ENSP00000294179,9606.ENSP00000295400,9606.ENSP00000325827,9606.ENSP00000330945,9606.ENSP00000338844,9606.ENSP00000346139,9606.ENSP00000358071,9606.ENSP00000359000,9606.ENSP00000378721,9606.ENSP00000381823,9606.ENSP00000386651,9606.ENSP00000390783,9606.ENSP00000444850	BET1,PREB,TMED2,GOLPH3,SEC24D,TRAPPC10,STX5,TGFA,SEC16A,TMED9,SEC23B,TBC1D20,SEC23IP,GBF1,SEC31A,SEC24A,MCFD2,SCFD1,USO1
GO:0042594	response to starvation	33	175	0.32	0.0056	9606.ENSP00000212015,9606.ENSP00000216037,9606.ENSP00000253063,9606.ENSP00000254605,9606.ENSP00000256383,9606.ENSP00000262039,9606.ENSP00000264033,9606.ENSP00000266458,9606.ENSP00000304004,9606.ENSP00000306682,9606.ENSP00000307235,9606.ENSP00000307260,9606.ENSP00000324173,9606.ENSP00000326119,9606.ENSP00000330032,9606.ENSP00000339191,9606.ENSP00000339881,9606.ENSP00000344352,9606.ENSP00000354558,…	SIRT1,XBP1,SESN2,RRP8,EIF2S1,PIK3C3,CBL,GABARAPL1,FOXA3,PPM1D,EIF2AK3,TBL2,HSPA5,PMAIP1,UPP1,CAV1,MIOS,ATF3,MTOR,NUAK2,JUN,RRAGC,ZC3H12A,NFE2L2,MTMR3,CDKN1A,CADPS2,FNIP1,ADM,DDIT3,ZFYVE1,ZFP36,BHLHA15
GO:1904292	regulation of ERAD pathway	11	28	0.64	0.0056	9606.ENSP00000158771,9606.ENSP00000185150,9606.ENSP00000216037,9606.ENSP00000221566,9606.ENSP00000256497,9606.ENSP00000326813,9606.ENSP00000339191,9606.ENSP00000380252,9606.ENSP00000383044,9606.ENSP00000409555,9606.ENSP00000451261	DERL2,ERLEC1,XBP1,SGTA,EDEM1,YOD1,CAV1,NFE2L2,USP25,HERPUD1,UBE2J1
GO:0031098	stress-activated protein kinase signaling cascade	28	138	0.35	0.0057	9606.ENSP00000013125,9606.ENSP00000220751,9606.ENSP00000226574,9606.ENSP00000256458,9606.ENSP00000259808,9606.ENSP00000263056,9606.ENSP00000263881,9606.ENSP00000264198,9606.ENSP00000265026,9606.ENSP00000265960,9606.ENSP00000304501,9606.ENSP00000312150,9606.ENSP00000345083,9606.ENSP00000356070,9606.ENSP00000358770,9606.ENSP00000359206,9606.ENSP00000359424,9606.ENSP00000360683,9606.ENSP00000370104,…	MAP4K5,RIPK2,NFKB1,IRAK2,RIPK1,MAP3K8,MAP4K3,MUL1,MAP3K13,MAPKAP1,ADORA2B,TRIB1,MAP2K3,MAPKAPK2,SLK,BTRC,CHUK,PTPN1,GPS2,MAP2K4,CSB-PGBD3,CRYAB,TRAF6,UBC,MAP3K9,ZFP36,MAP3K14,IKBKG
GO:0071850	mitotic cell cycle arrest	8	14	0.8	0.0057	9606.ENSP00000239223,9606.ENSP00000342924,9606.ENSP00000354916,9606.ENSP00000360025,9606.ENSP00000368664,9606.ENSP00000370253,9606.ENSP00000384849,9606.ENSP00000400646	DUSP1,MCPH1,CDC14A,GADD45A,RGCC,NKX3-1,CDKN1A,PNPT1
GO:0071347	cellular response to interleukin-1	26	124	0.36	0.006	9606.ENSP00000216797,9606.ENSP00000220751,9606.ENSP00000226574,9606.ENSP00000239938,9606.ENSP00000256458,9606.ENSP00000261523,9606.ENSP00000263056,9606.ENSP00000263339,9606.ENSP00000264832,9606.ENSP00000305422,9606.ENSP00000306512,9606.ENSP00000314733,9606.ENSP00000351789,9606.ENSP00000359206,9606.ENSP00000359424,9606.ENSP00000359478,9606.ENSP00000360762,9606.ENSP00000362179,9606.ENSP00000368683,…	NFKBIA,RIPK2,NFKB1,EGR1,IRAK2,RORA,MAP3K8,IL1A,ICAM1,CEBPB,CXCL8,TOLLIP,PELI1,BTRC,CHUK,ABCC2,ANKRD1,ZC3H12A,EDN1,NKX3-1,SQSTM1,RELA,TRAF6,UBC,RPS6KA5,IKBKG
GO:0010508	positive regulation of autophagy	23	103	0.39	0.0061	9606.ENSP00000212015,9606.ENSP00000216037,9606.ENSP00000216117,9606.ENSP00000220751,9606.ENSP00000248244,9606.ENSP00000253063,9606.ENSP00000264198,9606.ENSP00000274289,9606.ENSP00000285071,9606.ENSP00000298552,9606.ENSP00000331748,9606.ENSP00000346986,9606.ENSP00000348455,9606.ENSP00000354621,9606.ENSP00000361275,9606.ENSP00000362179,9606.ENSP00000363943,9606.ENSP00000365692,9606.ENSP00000365757,…	SIRT1,XBP1,HMOX1,RIPK2,TICAM1,SESN2,MUL1,PLK2,FLCN,TSC1,RAB12,WAC,UVRAG,SMURF1,PLK3,ZC3H12A,TP53INP2,PIM2,PIP4K2A,OPTN,SH3BP4,C9orf72,IKBKG
GO:0051345	positive regulation of hydrolase activity	99	742	0.17	0.0061	9606.ENSP00000033079,9606.ENSP00000056217,9606.ENSP00000200453,9606.ENSP00000212015,9606.ENSP00000220751,9606.ENSP00000221086,9606.ENSP00000225235,9606.ENSP00000234420,9606.ENSP00000235382,9606.ENSP00000240874,9606.ENSP00000250457,9606.ENSP00000254322,9606.ENSP00000257787,9606.ENSP00000259808,9606.ENSP00000260442,9606.ENSP00000260526,9606.ENSP00000260643,9606.ENSP00000263245,9606.ENSP00000264198,…	FAM13B,ARHGEF5,PPP1R15A,SIRT1,RIPK2,MTMR9,TBC1D12,MSH6,RGS2,KALRN,EGLN3,DNAJB1,AKIRIN2,RIPK1,BCL2L10,ARHGAP29,PREB,ARFGAP3,MUL1,ALS2,RASGEF1B,RAPGEF2,ICAM1,NRP1,DLC1,TNFRSF10B,FLT1,ARHGAP17,CDC42EP3,PCOLCE2,F2RL1,TSC1,ARHGAP42,FADD,ARAP2,FNTA,EIF2AK3,CYCS,CFLAR,DNAJA2,ARFGAP1,DVL3,KARS,PMAIP1,SMAD3,NDEL1,ARHGAP10,DNAJB2,STARD13,CAV1,CREB3,ARHGAP12,TBC1D20,NET1,TBC1D8B,EPHA2,VCP,MTCL1,MTOR,SIPA1L2…
GO:0071456	cellular response to hypoxia	28	139	0.35	0.0063	9606.ENSP00000179259,9606.ENSP00000212015,9606.ENSP00000216117,9606.ENSP00000239938,9606.ENSP00000250457,9606.ENSP00000261523,9606.ENSP00000263980,9606.ENSP00000264832,9606.ENSP00000297991,9606.ENSP00000306124,9606.ENSP00000307260,9606.ENSP00000310928,9606.ENSP00000312455,9606.ENSP00000326119,9606.ENSP00000327801,9606.ENSP00000354558,9606.ENSP00000360762,9606.ENSP00000361275,9606.ENSP00000368664,…	C12orf5,SIRT1,HMOX1,EGR1,EGLN3,RORA,SLC9A1,ICAM1,AQP3,PRKCE,TBL2,PPARD,CFLAR,PMAIP1,P4HB,MTOR,ANKRD1,PLK3,RGCC,EDN1,NKX3-1,NFE2L2,BACH1,HIPK2,FOXO3,UBC,CPEB2,CITED2
GO:1901652	response to peptide	64	431	0.21	0.0063	9606.ENSP00000209728,9606.ENSP00000212015,9606.ENSP00000216037,9606.ENSP00000216797,9606.ENSP00000220751,9606.ENSP00000226574,9606.ENSP00000229416,9606.ENSP00000238738,9606.ENSP00000239938,9606.ENSP00000242480,9606.ENSP00000244869,9606.ENSP00000245787,9606.ENSP00000252818,9606.ENSP00000253063,9606.ENSP00000254958,9606.ENSP00000256015,9606.ENSP00000263805,9606.ENSP00000263980,9606.ENSP00000264832,…	CDC6,SIRT1,XBP1,NFKBIA,RIPK2,NFKB1,GCLC,RHOQ,EGR1,EGR2,EREG,INSIG2,JUND,SESN2,JAG1,BTG1,ZNF106,SLC9A1,ICAM1,GAL,EIF2B2,PAK1,QDPR,BTG2,STAT5B,TSC1,CRK,SLC25A33,YWHAG,CFLAR,NDEL1,CAV1,NR4A2,ENPP1,MTOR,CTGF,ABCC2,SORBS1,PTPN1,KLF4,IRS2,ERRFI1,EDN1,NFE2L2,VIMP,GRB10,MYO5A,RELA,FOXO3,CREB1,TLR6,BCAR1,EIF2B4,LPIN1,PNPT1,SHC1,ATP6V0B,ADM,NR4A1,CPEB2,TRIM16,TNFAIP3,NR4A3,SOCS7
GO:0006903	vesicle targeting	20	83	0.42	0.0064	9606.ENSP00000009041,9606.ENSP00000222547,9606.ENSP00000223369,9606.ENSP00000260643,9606.ENSP00000262139,9606.ENSP00000262225,9606.ENSP00000280551,9606.ENSP00000291574,9606.ENSP00000294179,9606.ENSP00000295400,9606.ENSP00000325827,9606.ENSP00000330945,9606.ENSP00000346139,9606.ENSP00000358071,9606.ENSP00000359000,9606.ENSP00000378721,9606.ENSP00000381823,9606.ENSP00000386651,9606.ENSP00000390783,…	STARD3NL,BET1,YKT6,PREB,WIPI1,TMED2,SEC24D,TRAPPC10,STX5,TGFA,SEC16A,TMED9,TBC1D20,SEC23IP,GBF1,SEC31A,SEC24A,MCFD2,SCFD1,USO1
GO:0070555	response to interleukin-1	29	147	0.34	0.0066	9606.ENSP00000216797,9606.ENSP00000220751,9606.ENSP00000226574,9606.ENSP00000229416,9606.ENSP00000239938,9606.ENSP00000256458,9606.ENSP00000261523,9606.ENSP00000263056,9606.ENSP00000263339,9606.ENSP00000264832,9606.ENSP00000305422,9606.ENSP00000306512,9606.ENSP00000314733,9606.ENSP00000351789,9606.ENSP00000359206,9606.ENSP00000359424,9606.ENSP00000359478,9606.ENSP00000360762,9606.ENSP00000362179,…	NFKBIA,RIPK2,NFKB1,GCLC,EGR1,IRAK2,RORA,MAP3K8,IL1A,ICAM1,CEBPB,CXCL8,TOLLIP,PELI1,BTRC,CHUK,ABCC2,ANKRD1,ZC3H12A,EDN1,TAF9,NKX3-1,SQSTM1,ETS1,RELA,TRAF6,UBC,RPS6KA5,IKBKG
GO:1901565	organonitrogen compound catabolic process	122	958	0.15	0.0068	9606.ENSP00000158771,9606.ENSP00000171111,9606.ENSP00000185150,9606.ENSP00000212015,9606.ENSP00000215904,9606.ENSP00000216037,9606.ENSP00000216117,9606.ENSP00000217402,9606.ENSP00000218516,9606.ENSP00000219313,9606.ENSP00000221566,9606.ENSP00000237455,9606.ENSP00000242719,9606.ENSP00000246672,9606.ENSP00000247977,9606.ENSP00000248958,9606.ENSP00000249356,9606.ENSP00000256257,9606.ENSP00000256497,…	DERL2,KEAP1,ERLEC1,SIRT1,PDXP,XBP1,HMOX1,CHMP4B,GLA,PSMD7,SGTA,RNF103,RNF11,NR1D1,FBXL12,SDF2L1,DNAJB9,RNF122,EDEM1,KIAA0368,RIPK1,USP2,PSMD11,FAF2,UFD1L,SLC9A1,CBL,PSMD3,GET4,BTBD11,QDPR,FBXW7,USP12,TMEM199,CHAC2,UBAP1,HSP90B1,KCTD5,RNF139,RNF181,FBXO45,KCTD2,SPHK1,KLHL11,TOLLIP,CLU,USP9X,RBBP6,VPS37A,RNF168,RCHY1,SIAH2,HSPA5,PMAIP1,YOD1,CLN8,UPP1,NPLOC4,RAB12,PDE4B,HSP90AA1,DLST,KLHL25,DNAJB2,K…
GO:0009266	response to temperature stimulus	30	155	0.33	0.007	9606.ENSP00000216117,9606.ENSP00000216797,9606.ENSP00000229416,9606.ENSP00000252229,9606.ENSP00000256383,9606.ENSP00000260356,9606.ENSP00000263339,9606.ENSP00000263980,9606.ENSP00000266126,9606.ENSP00000301365,9606.ENSP00000306245,9606.ENSP00000307235,9606.ENSP00000314030,9606.ENSP00000315731,9606.ENSP00000335153,9606.ENSP00000356410,9606.ENSP00000356549,9606.ENSP00000358081,9606.ENSP00000358301,…	HMOX1,NFKBIA,GCLC,MICB,EIF2S1,THBS1,IL1A,SLC9A1,EIF2B2,TRPV3,FOS,EIF2AK3,DNAJA2,METRNL,HSP90AA1,GLRX2,IER5,BAG3,ADRB1,ABCC2,DNAJB4,HSPA1B,DNAJA4,CDKN1A,ATP2B1,ZNF516,EIF2B4,MICA,ADM,DNAJC3
GO:0050687	negative regulation of defense response to virus	10	24	0.66	0.007	9606.ENSP00000252229,9606.ENSP00000263202,9606.ENSP00000264198,9606.ENSP00000282412,9606.ENSP00000331487,9606.ENSP00000341874,9606.ENSP00000349596,9606.ENSP00000354645,9606.ENSP00000376268,9606.ENSP00000480499	MICB,UFD1L,MUL1,PPM1B,NPLOC4,RIOK3,TRIM38,GPATCH3,SEC14L1,ITCH
GO:0045732	positive regulation of protein catabolic process	38	217	0.29	0.0071	9606.ENSP00000171111,9606.ENSP00000216037,9606.ENSP00000221566,9606.ENSP00000229416,9606.ENSP00000256497,9606.ENSP00000274289,9606.ENSP00000281708,9606.ENSP00000287437,9606.ENSP00000294179,9606.ENSP00000304051,9606.ENSP00000312150,9606.ENSP00000313391,9606.ENSP00000314619,9606.ENSP00000315130,9606.ENSP00000321239,9606.ENSP00000326095,9606.ENSP00000335153,9606.ENSP00000338019,9606.ENSP00000339191,…	KEAP1,XBP1,SGTA,GCLC,EDEM1,PLK2,FBXW7,NSMCE2,STX5,RNF139,TRIB1,DAB2,ZFAND2A,CLU,RCHY1,RNF166,HSP90AA1,DNAJB2,CAV1,RNF41,NRD1,MYLIP,VCP,SMURF1,LONRF3,PLK3,RNF19B,CSNK1E,NFE2L2,LONRF1,NEDD4L,RDX,HERPUD1,TIPARP,LDLR,OAZ1,ITCH,TNFAIP3
GO:0002218	activation of innate immune response	34	186	0.3	0.0072	9606.ENSP00000216797,9606.ENSP00000220751,9606.ENSP00000221452,9606.ENSP00000226574,9606.ENSP00000229332,9606.ENSP00000248244,9606.ENSP00000251849,9606.ENSP00000256458,9606.ENSP00000259808,9606.ENSP00000262039,9606.ENSP00000278568,9606.ENSP00000284274,9606.ENSP00000299767,9606.ENSP00000301838,9606.ENSP00000306124,9606.ENSP00000319279,9606.ENSP00000343966,9606.ENSP00000356070,9606.ENSP00000359424,…	NFKBIA,RIPK2,RELB,NFKB1,CLEC4A,TICAM1,RAF1,IRAK2,RIPK1,PIK3C3,PAK1,OTULIN,HSP90B1,FADD,PRKCE,MALT1,PSPC1,MAPKAPK2,CHUK,BCL10,DDX58,TRIM5,RELA,TLR6,CYLD,MUC20,MUC4,TRAF6,UBC,TRAF3,RPS6KA5,ITCH,TNFAIP3,IKBKG
GO:0009991	response to extracellular stimulus	70	486	0.2	0.0072	9606.ENSP00000212015,9606.ENSP00000215904,9606.ENSP00000216037,9606.ENSP00000216117,9606.ENSP00000228606,9606.ENSP00000229416,9606.ENSP00000252809,9606.ENSP00000253063,9606.ENSP00000254066,9606.ENSP00000254605,9606.ENSP00000256383,9606.ENSP00000256429,9606.ENSP00000261292,9606.ENSP00000262039,9606.ENSP00000264033,9606.ENSP00000264832,9606.ENSP00000265354,9606.ENSP00000266458,9606.ENSP00000275300,…	SIRT1,PDXP,XBP1,HMOX1,CYP27B1,GCLC,GDF15,SESN2,RARA,RRP8,EIF2S1,MBD2,LIPG,PIK3C3,CBL,ICAM1,SRF,GABARAPL1,SLC22A3,CDKN2B,CCRN4L,AQP3,TSC1,HSP90B1,FOXA3,ADORA2B,FOS,PPM1D,EIF2AK3,TBL2,FOSL1,PPARD,SSH1,HMGCS1,HSPA5,PMAIP1,UPP1,CAV1,MIOS,ATF3,NR4A2,ADIPOR2,P2RX4,MTOR,PROX1,NUAK2,GLRX2,ADRB1,GCLM,BCL10,JUN,RRAGC,SLC25A25,ZC3H12A,PIM1,NFE2L2,RELA,MTMR3,CDKN1A,FOXO3,CREB1,ATP2B1,CADPS2,FNIP1,ADM,DDIT3,Z…
GO:0032874	positive regulation of stress-activated MAPK cascade	29	148	0.33	0.0072	9606.ENSP00000013125,9606.ENSP00000056217,9606.ENSP00000215631,9606.ENSP00000220751,9606.ENSP00000259808,9606.ENSP00000260130,9606.ENSP00000262395,9606.ENSP00000264198,9606.ENSP00000278568,9606.ENSP00000284637,9606.ENSP00000294312,9606.ENSP00000296677,9606.ENSP00000310042,9606.ENSP00000316054,9606.ENSP00000325448,9606.ENSP00000356954,9606.ENSP00000360025,9606.ENSP00000360683,9606.ENSP00000362179,…	MAP4K5,ARHGEF5,GADD45B,RIPK2,RIPK1,SDCBP,TRAF4,MUL1,PAK1,SH3RF1,FGF19,F2RL1,ZNF622,DVL3,KARS,CTGF,GADD45A,PTPN1,ZC3H12A,DKK1,BMP2,EDN1,XDH,HIPK2,TLR6,MAP2K4,CSB-PGBD3,TRAF6,MAP3K9
GO:1901800	positive regulation of proteasomal protein catabolic process	24	112	0.37	0.0075	9606.ENSP00000171111,9606.ENSP00000216037,9606.ENSP00000221566,9606.ENSP00000229416,9606.ENSP00000256497,9606.ENSP00000274289,9606.ENSP00000281708,9606.ENSP00000287437,9606.ENSP00000312150,9606.ENSP00000313391,9606.ENSP00000314619,9606.ENSP00000315130,9606.ENSP00000321239,9606.ENSP00000326095,9606.ENSP00000338019,9606.ENSP00000339191,9606.ENSP00000351777,9606.ENSP00000360690,9606.ENSP00000361275,…	KEAP1,XBP1,SGTA,GCLC,EDEM1,PLK2,FBXW7,NSMCE2,TRIB1,DAB2,ZFAND2A,CLU,RCHY1,RNF166,DNAJB2,CAV1,VCP,LONRF3,PLK3,RNF19B,CSNK1E,NFE2L2,LONRF1,HERPUD1
GO:0006901	vesicle coating	17	65	0.46	0.0078	9606.ENSP00000222547,9606.ENSP00000260643,9606.ENSP00000262225,9606.ENSP00000280551,9606.ENSP00000291574,9606.ENSP00000294179,9606.ENSP00000295400,9606.ENSP00000325827,9606.ENSP00000330945,9606.ENSP00000346139,9606.ENSP00000358071,9606.ENSP00000359000,9606.ENSP00000378721,9606.ENSP00000381823,9606.ENSP00000386651,9606.ENSP00000390783,9606.ENSP00000444850	BET1,PREB,TMED2,SEC24D,TRAPPC10,STX5,TGFA,SEC16A,TMED9,TBC1D20,SEC23IP,GBF1,SEC31A,SEC24A,MCFD2,SCFD1,USO1
GO:1903052	positive regulation of proteolysis involved in cellular protein catabolic process	26	127	0.35	0.0079	9606.ENSP00000171111,9606.ENSP00000216037,9606.ENSP00000221566,9606.ENSP00000229416,9606.ENSP00000256497,9606.ENSP00000274289,9606.ENSP00000281708,9606.ENSP00000287437,9606.ENSP00000304051,9606.ENSP00000312150,9606.ENSP00000313391,9606.ENSP00000314619,9606.ENSP00000315130,9606.ENSP00000321239,9606.ENSP00000326095,9606.ENSP00000338019,9606.ENSP00000339191,9606.ENSP00000351777,9606.ENSP00000354621,…	KEAP1,XBP1,SGTA,GCLC,EDEM1,PLK2,FBXW7,NSMCE2,RNF139,TRIB1,DAB2,ZFAND2A,CLU,RCHY1,RNF166,DNAJB2,CAV1,VCP,SMURF1,LONRF3,PLK3,RNF19B,CSNK1E,NFE2L2,LONRF1,HERPUD1
GO:0002832	negative regulation of response to biotic stimulus	20	85	0.41	0.0081	9606.ENSP00000252229,9606.ENSP00000257604,9606.ENSP00000262510,9606.ENSP00000263202,9606.ENSP00000264198,9606.ENSP00000282412,9606.ENSP00000300574,9606.ENSP00000312150,9606.ENSP00000331487,9606.ENSP00000341874,9606.ENSP00000349596,9606.ENSP00000354645,9606.ENSP00000355866,9606.ENSP00000358092,9606.ENSP00000365817,9606.ENSP00000370074,9606.ENSP00000376268,9606.ENSP00000413079,9606.ENSP00000480499,…	MICB,TRAFD1,NLRC5,UFD1L,MUL1,PPM1B,CRK,TRIB1,NPLOC4,RIOK3,TRIM38,GPATCH3,DUSP10,PRDM1,HLA-E,SERPINB9,SEC14L1,MICA,ITCH,TNFAIP3
GO:0045598	regulation of fat cell differentiation	25	120	0.36	0.0081	9606.ENSP00000212015,9606.ENSP00000216037,9606.ENSP00000246672,9606.ENSP00000254958,9606.ENSP00000261523,9606.ENSP00000267569,9606.ENSP00000280614,9606.ENSP00000305422,9606.ENSP00000310928,9606.ENSP00000315731,9606.ENSP00000327832,9606.ENSP00000332973,9606.ENSP00000339299,9606.ENSP00000344741,9606.ENSP00000354238,9606.ENSP00000354558,9606.ENSP00000355866,9606.ENSP00000362179,9606.ENSP00000368104,…	SIRT1,XBP1,NR1D1,JAG1,RORA,JDP2,CCRN4L,CEBPB,PPARD,METRNL,ATAT1,SMAD3,TRIO,INSIG1,ENPP1,MTOR,DUSP10,ZC3H12A,BMP2,GPS2,ASXL2,ARNTL,CREB1,DDIT3,ZFP36
GO:2000116	regulation of cysteine-type endopeptidase activity	41	243	0.27	0.0081	9606.ENSP00000212015,9606.ENSP00000220751,9606.ENSP00000250457,9606.ENSP00000251849,9606.ENSP00000259808,9606.ENSP00000260356,9606.ENSP00000260442,9606.ENSP00000263464,9606.ENSP00000264198,9606.ENSP00000265165,9606.ENSP00000276297,9606.ENSP00000276431,9606.ENSP00000284637,9606.ENSP00000301838,9606.ENSP00000307235,9606.ENSP00000307786,9606.ENSP00000310263,9606.ENSP00000312455,9606.ENSP00000322457,…	SIRT1,RIPK2,EGLN3,RAF1,RIPK1,THBS1,BCL2L10,BIRC3,MUL1,LEF1,DLC1,TNFRSF10B,SH3RF1,FADD,EIF2AK3,CYCS,TNFRSF10D,CFLAR,SIAH2,PMAIP1,SMAD3,PLAUR,SFN,VCP,CTGF,BCL10,MTCH1,BAK1,KLF4,XDH,SERPINB9,NKX3-1,SLC11A2,DIABLO,CYR61,HERPUD1,FNIP1,CRYAB,RPS6KA1,BIRC2,BCL2L13
GO:0031398	positive regulation of protein ubiquitination	24	113	0.37	0.0082	9606.ENSP00000220751,9606.ENSP00000248244,9606.ENSP00000260247,9606.ENSP00000263464,9606.ENSP00000265138,9606.ENSP00000268042,9606.ENSP00000281708,9606.ENSP00000296257,9606.ENSP00000313681,9606.ENSP00000319279,9606.ENSP00000319482,9606.ENSP00000321239,9606.ENSP00000324173,9606.ENSP00000338019,9606.ENSP00000339191,9606.ENSP00000349547,9606.ENSP00000351789,9606.ENSP00000353735,9606.ENSP00000355013,…	RIPK2,TICAM1,DCUN1D5,BIRC3,ARRDC3,ARRDC4,FBXW7,SENP2,SPHK1,MALT1,DCUN1D3,RCHY1,HSPA5,DNAJB2,CAV1,RASSF1,PELI1,TOPORS,CTR9,BCL10,DCUN1D2,TRAF6,RNF111,BIRC2
GO:0046685	response to arsenic-containing substance	11	30	0.61	0.0084	9606.ENSP00000216117,9606.ENSP00000225174,9606.ENSP00000229416,9606.ENSP00000250896,9606.ENSP00000314619,9606.ENSP00000344352,9606.ENSP00000359478,9606.ENSP00000362179,9606.ENSP00000384849,9606.ENSP00000426503,9606.ENSP00000443985	HMOX1,PPIF,GCLC,MKNK2,ZFAND2A,ATF3,ABCC2,ZC3H12A,CDKN1A,RNF4,CPEB2
GO:0008285	negative regulation of cell population proliferation	90	669	0.17	0.0085	9606.ENSP00000209728,9606.ENSP00000216117,9606.ENSP00000228606,9606.ENSP00000239223,9606.ENSP00000244869,9606.ENSP00000245414,9606.ENSP00000249075,9606.ENSP00000249749,9606.ENSP00000251849,9606.ENSP00000254066,9606.ENSP00000256015,9606.ENSP00000260356,9606.ENSP00000263339,9606.ENSP00000264431,9606.ENSP00000265354,9606.ENSP00000265643,9606.ENSP00000270221,9606.ENSP00000273550,9606.ENSP00000273668,…	CDC6,HMOX1,CYP27B1,DUSP1,EREG,IRF1,LIF,DLL4,RAF1,RARA,BTG1,THBS1,IL1A,RAPGEF2,SRF,GAL,EMP3,FTH1,EAF2,DLC1,CDKN2B,PAK1,FBXW7,FLT1,FLCN,BTG2,TSC1,IL12A,RNF139,CEBPB,CXCL8,PPM1D,FOSL1,PPARD,TRIB1,PINX1,RNF10,KARS,IFNLR1,TOB2,SMAD3,ARID2,OVOL1,DNAJB2,ZBTB49,CAV1,SFN,JARID2,RNF41,BTG3,BTN2A2,TES,PELI1,ADARB1,ZEB1,DUSP10,PROX1,IRF6,ETV3,PRDM1,JUN,RAPGEF1,DLG5,ZNF503,SDC4,BAK1,KLF4,HSPA1B,ING1,PIM2,SPRY…
GO:0000079	regulation of cyclin-dependent protein serine/threonine kinase activity	20	86	0.41	0.009	9606.ENSP00000209728,9606.ENSP00000261254,9606.ENSP00000264157,9606.ENSP00000265963,9606.ENSP00000276925,9606.ENSP00000295926,9606.ENSP00000303706,9606.ENSP00000309968,9606.ENSP00000330382,9606.ENSP00000335628,9606.ENSP00000340989,9606.ENSP00000342344,9606.ENSP00000350633,9606.ENSP00000355925,9606.ENSP00000360025,9606.ENSP00000362608,9606.ENSP00000368664,9606.ENSP00000372035,9606.ENSP00000384849,…	CDC6,CCND2,CCNT2,GTF2H1,CDKN2B,CCNL1,CDC25A,ADAM17,PDGFB,SPDYA,SFN,CCNYL1,SERTAD1,PROX1,GADD45A,PIM1,RGCC,LATS2,CDKN1A,TNFAIP3
GO:0002221	pattern recognition receptor signaling pathway	24	114	0.37	0.009	9606.ENSP00000216797,9606.ENSP00000220751,9606.ENSP00000248244,9606.ENSP00000256458,9606.ENSP00000259808,9606.ENSP00000262039,9606.ENSP00000284274,9606.ENSP00000299767,9606.ENSP00000301838,9606.ENSP00000306124,9606.ENSP00000356070,9606.ENSP00000359424,9606.ENSP00000359612,9606.ENSP00000369213,9606.ENSP00000369373,9606.ENSP00000384273,9606.ENSP00000389600,9606.ENSP00000392025,9606.ENSP00000433623,…	NFKBIA,RIPK2,TICAM1,IRAK2,RIPK1,PIK3C3,OTULIN,HSP90B1,FADD,PRKCE,MAPKAPK2,CHUK,BCL10,DDX58,TRIM5,RELA,TLR6,CYLD,TRAF6,UBC,TRAF3,ITCH,TNFAIP3,IKBKG
GO:0001818	negative regulation of cytokine production	41	245	0.27	0.0092	9606.ENSP00000164227,9606.ENSP00000216117,9606.ENSP00000221452,9606.ENSP00000226574,9606.ENSP00000229332,9606.ENSP00000232496,9606.ENSP00000254066,9606.ENSP00000260356,9606.ENSP00000262510,9606.ENSP00000263202,9606.ENSP00000264198,9606.ENSP00000264607,9606.ENSP00000265165,9606.ENSP00000269701,9606.ENSP00000282412,9606.ENSP00000295025,9606.ENSP00000296677,9606.ENSP00000303231,9606.ENSP00000317144,…	BCL3,HMOX1,RELB,NFKB1,CLEC4A,TUSC2,RARA,THBS1,NLRC5,UFD1L,MUL1,ASB1,LEF1,AKAP8,PPM1B,REL,F2RL1,IL12A,PIBF1,NPLOC4,BTN2A2,GPATCH3,IL6R,ZC3H12A,KLF4,ERRFI1,CD83,RGCC,DDX58,CD274,GPNMB,VIMP,BCL6,TLR6,CYLD,OTUD7B,ZFP36,TNFRSF9,RPS6KA5,ITCH,TNFAIP3
GO:0009607	response to biotic stimulus	147	1206	0.13	0.0093	9606.ENSP00000064780,9606.ENSP00000164227,9606.ENSP00000216037,9606.ENSP00000216629,9606.ENSP00000216797,9606.ENSP00000220751,9606.ENSP00000221452,9606.ENSP00000223095,9606.ENSP00000226574,9606.ENSP00000227752,9606.ENSP00000228606,9606.ENSP00000229332,9606.ENSP00000232496,9606.ENSP00000234111,9606.ENSP00000239938,9606.ENSP00000245414,9606.ENSP00000245907,9606.ENSP00000246672,9606.ENSP00000248244,…	RELT,BCL3,XBP1,BDKRB1,NFKBIA,RIPK2,RELB,SERPINE1,NFKB1,IL10RA,CYP27B1,CLEC4A,TUSC2,ODC1,EGR1,IRF1,C3,NR1D1,TICAM1,MICB,JUND,RARA,IRAK2,OASL,AKIRIN2,NLRC5,VAMP7,ICAM1,AKAP8,TNFRSF10B,CCRN4L,OTULIN,TRIM11,CA3,IFNGR2,FGF19,REL,CXCL3,CXCL5,F2RL1,CRK,FADD,IL12A,JUNB,CEBPB,PRKCE,FOS,CXCL8,ISG20,PPM1D,EIF2AK3,DDIT4,PDE12,ADAM17,FOSL1,TNFRSF10D,PPARD,ELF4,TRIB1,NFKBIB,TOLLIP,CLU,STX4,MALT1,HSPA5,PMAIP1,C…
GO:0046890	regulation of lipid biosynthetic process	32	174	0.31	0.0093	9606.ENSP00000212015,9606.ENSP00000216037,9606.ENSP00000226574,9606.ENSP00000228606,9606.ENSP00000239938,9606.ENSP00000243045,9606.ENSP00000244050,9606.ENSP00000245787,9606.ENSP00000245907,9606.ENSP00000246672,9606.ENSP00000265896,9606.ENSP00000270162,9606.ENSP00000281708,9606.ENSP00000287878,9606.ENSP00000294312,9606.ENSP00000301012,9606.ENSP00000317144,9606.ENSP00000322706,9606.ENSP00000330382,…	SIRT1,XBP1,NFKB1,CYP27B1,EGR1,ORMDL2,SNAI1,INSIG2,C3,NR1D1,SQLE,SIK1,FBXW7,PRKAG2,FGF19,MVD,PIBF1,HMGCS1,PDGFB,INSIG1,NFYA,PDGFA,ADIPOR2,MTOR,PROX1,SORBS1,BMP2,CREB1,CYR61,MVK,LDLR,SEC14L2
GO:0043620	regulation of DNA-templated transcription in response to stress	18	73	0.43	0.0094	9606.ENSP00000216037,9606.ENSP00000216117,9606.ENSP00000239938,9606.ENSP00000250457,9606.ENSP00000253063,9606.ENSP00000254322,9606.ENSP00000305422,9606.ENSP00000324173,9606.ENSP00000344352,9606.ENSP00000358081,9606.ENSP00000360266,9606.ENSP00000380252,9606.ENSP00000382805,9606.ENSP00000384273,9606.ENSP00000435412,9606.ENSP00000441543,9606.ENSP00000444198,9606.ENSP00000448665	XBP1,HMOX1,EGR1,EGLN3,SESN2,DNAJB1,CEBPB,HSPA5,ATF3,BAG3,JUN,NFE2L2,BACH1,RELA,RPS6KA1,UBC,CITED2,DDIT3
GO:0044248	cellular catabolic process	192	1646	0.11	0.01	9606.ENSP00000158771,9606.ENSP00000171111,9606.ENSP00000179259,9606.ENSP00000185150,9606.ENSP00000212015,9606.ENSP00000215904,9606.ENSP00000216037,9606.ENSP00000216117,9606.ENSP00000217402,9606.ENSP00000218516,9606.ENSP00000219313,9606.ENSP00000220509,9606.ENSP00000221566,9606.ENSP00000228606,9606.ENSP00000231668,9606.ENSP00000237455,9606.ENSP00000237642,9606.ENSP00000242719,9606.ENSP00000246672,…	DERL2,KEAP1,C12orf5,ERLEC1,SIRT1,PDXP,XBP1,HMOX1,CHMP4B,GLA,PSMD7,VPS18,SGTA,CYP27B1,BNIP1,RNF103,STBD1,RNF11,NR1D1,FBXL12,SDF2L1,DNAJB9,SESN2,RNF122,EDEM1,KIAA0368,RIPK1,USP2,LIPG,LPIN2,PSMD11,FAF2,PIK3C3,WIPI1,UFD1L,SLC9A1,CBL,PSMD3,GET4,GABARAPL1,VPS37B,C18orf8,NPC1,PELO,NRBF2,CCRN4L,BTBD11,QDPR,FBXW7,USP12,PRKAG2,CBR3,TMEM199,CHAC2,WDFY3,KIAA0226,UBAP1,HSP90B1,KCTD5,VPS37C,RNF139,RAB24,TMEM20…
GO:0035970	peptidyl-threonine dephosphorylation	8	16	0.74	0.0103	9606.ENSP00000239223,9606.ENSP00000240100,9606.ENSP00000282412,9606.ENSP00000306682,9606.ENSP00000355866,9606.ENSP00000358596,9606.ENSP00000379503,9606.ENSP00000418447	DUSP1,DUSP4,PPM1B,PPM1D,DUSP10,DUSP5,PDP1,PPP2CA
GO:1901701	cellular response to oxygen-containing compound	114	896	0.15	0.0103	9606.ENSP00000209728,9606.ENSP00000212015,9606.ENSP00000215904,9606.ENSP00000216037,9606.ENSP00000216797,9606.ENSP00000220751,9606.ENSP00000223095,9606.ENSP00000224140,9606.ENSP00000225174,9606.ENSP00000226574,9606.ENSP00000229416,9606.ENSP00000238738,9606.ENSP00000239938,9606.ENSP00000242057,9606.ENSP00000246672,9606.ENSP00000248244,9606.ENSP00000251849,9606.ENSP00000253063,9606.ENSP00000254066,…	CDC6,SIRT1,PDXP,XBP1,NFKBIA,RIPK2,SERPINE1,SETX,PPIF,NFKB1,GCLC,RHOQ,EGR1,AHR,NR1D1,TICAM1,RAF1,SESN2,RARA,KDM6B,IRAK2,RAB11FIP5,RORA,ADNP2,ZNF106,SLC9A1,RAPGEF2,ICAM1,SRF,AKAP8,RHOB,PAK1,STAT5B,HSP90B1,CRK,IL12A,LRP8,CEBPB,PRKCE,FOS,SLC25A33,YWHAG,CXCL8,DDIT4,PPARD,CFLAR,NFKBIB,SSH1,HMGCS1,HSPA5,PDGFB,PDE4B,NDEL1,CAV1,NR4A2,INSIG1,NET1,P2RX4,ENPP1,ZEB1,MTOR,SBNO2,CTR9,GLRX2,GCLM,CHUK,ABCC2,JUN,S…
GO:0032147	activation of protein kinase activity	53	347	0.23	0.0105	9606.ENSP00000013125,9606.ENSP00000215631,9606.ENSP00000220751,9606.ENSP00000251849,9606.ENSP00000252809,9606.ENSP00000256458,9606.ENSP00000259808,9606.ENSP00000260356,9606.ENSP00000262395,9606.ENSP00000263056,9606.ENSP00000263881,9606.ENSP00000264198,9606.ENSP00000264276,9606.ENSP00000265026,9606.ENSP00000265960,9606.ENSP00000276431,9606.ENSP00000278568,9606.ENSP00000287878,9606.ENSP00000288602,…	MAP4K5,GADD45B,RIPK2,RAF1,GDF15,IRAK2,RIPK1,THBS1,TRAF4,MAP3K8,MAP4K3,MUL1,ALS2,MAP3K13,MAPKAP1,TNFRSF10B,PAK1,PRKAG2,BRAF,TGFA,CRK,ADORA2B,PIBF1,MALT1,KARS,PDGFB,SPDYA,MAP2K3,MTOR,MAPKAPK2,PEA15,DUSP5,SLK,AVPI1,GADD45A,PTPN1,RAPGEF1,SPRY2,BMP2,RGCC,NKX3-1,CDKN1A,TLR6,SHC1,MAP2K4,ENSG00000272752,MUC20,CSB-PGBD3,TRAF6,UBC,MAP3K9,MAP3K14,IKBKG
GO:0000188	inactivation of MAPK activity	10	26	0.63	0.0109	9606.ENSP00000239223,9606.ENSP00000240100,9606.ENSP00000288943,9606.ENSP00000298573,9606.ENSP00000339191,9606.ENSP00000355866,9606.ENSP00000358596,9606.ENSP00000370104,9606.ENSP00000380530,9606.ENSP00000418447	DUSP1,DUSP4,DUSP2,DUSP16,CAV1,DUSP10,DUSP5,GPS2,DUSP8,PPP2CA
GO:0032870	cellular response to hormone stimulus	80	585	0.18	0.011	9606.ENSP00000209728,9606.ENSP00000212015,9606.ENSP00000216037,9606.ENSP00000226574,9606.ENSP00000229416,9606.ENSP00000238738,9606.ENSP00000239223,9606.ENSP00000245919,9606.ENSP00000246672,9606.ENSP00000251871,9606.ENSP00000252818,9606.ENSP00000254066,9606.ENSP00000261523,9606.ENSP00000262643,9606.ENSP00000263805,9606.ENSP00000263980,9606.ENSP00000264832,9606.ENSP00000265165,9606.ENSP00000269228,…	CDC6,SIRT1,XBP1,NFKB1,GCLC,RHOQ,DUSP1,FOSB,NR1D1,MED17,JUND,RARA,RORA,CCNE1,ZNF106,SLC9A1,ICAM1,LEF1,NPC1,AKAP8,SIK1,PAK1,STAT5B,CRK,JUNB,SIK2,PRKCE,FOS,SLC25A33,YWHAG,DDIT4,NR1D2,PPARD,CFLAR,CALR,HMGCS1,NDEL1,CAV1,NR4A2,PMEPA1,ADIPOR2,ENPP1,GCLM,ABCC2,JUN,SORBS1,PTPN1,NCOA3,IRS2,KLF9,ERRFI1,EDN1,NKX3-1,LATS2,USP8,NFE2L2,MED13,VIMP,GRB10,MYO5A,RDX,RELA,FOXO3,KDM3A,FHL2,CREB1,BCAR1,ATP2B1,LPIN1,SH…
GO:0032922	circadian regulation of gene expression	15	55	0.48	0.0111	9606.ENSP00000212015,9606.ENSP00000221452,9606.ENSP00000222553,9606.ENSP00000242057,9606.ENSP00000246672,9606.ENSP00000256495,9606.ENSP00000260187,9606.ENSP00000261523,9606.ENSP00000280614,9606.ENSP00000314420,9606.ENSP00000319169,9606.ENSP00000380044,9606.ENSP00000382688,9606.ENSP00000384517,9606.ENSP00000478187	SIRT1,RELB,NAMPT,AHR,NR1D1,BHLHE40,USP2,RORA,CCRN4L,PER1,PRMT5,CSNK1E,KDM5A,ARNTL,CRY2
GO:1905898	positive regulation of response to endoplasmic reticulum stress	12	37	0.55	0.0111	9606.ENSP00000200453,9606.ENSP00000212015,9606.ENSP00000216037,9606.ENSP00000221566,9606.ENSP00000256497,9606.ENSP00000326119,9606.ENSP00000339191,9606.ENSP00000360683,9606.ENSP00000363591,9606.ENSP00000380252,9606.ENSP00000409555,9606.ENSP00000448665	PPP1R15A,SIRT1,XBP1,SGTA,EDEM1,PMAIP1,CAV1,PTPN1,BAK1,NFE2L2,HERPUD1,DDIT3
GO:0001701	in utero embryonic development	48	306	0.24	0.0112	9606.ENSP00000171111,9606.ENSP00000198767,9606.ENSP00000216038,9606.ENSP00000216489,9606.ENSP00000230321,9606.ENSP00000230340,9606.ENSP00000237937,9606.ENSP00000244050,9606.ENSP00000249075,9606.ENSP00000257566,9606.ENSP00000262225,9606.ENSP00000262809,9606.ENSP00000263640,9606.ENSP00000264276,9606.ENSP00000265165,9606.ENSP00000265354,9606.ENSP00000280551,9606.ENSP00000283228,9606.ENSP00000285071,…	KEAP1,RRN3,RTCB,ALKBH1,MDFI,BYSL,ZFAND5,SNAI1,LIF,TBX3,TMED2,ELL,ACVR1,ALS2,LEF1,SRF,SEC24D,PTPRR,FLCN,SENP2,JUNB,CEBPB,FOSL1,HEG1,RBBP6,ZNF335,SOCS3,PDGFB,SMAD3,NDEL1,MAFF,MAFG,ELF3,CTR9,PRDM1,NSDHL,GJB3,KDM6A,BMP2,EDN1,JMJD2C,SETD2,CHD7,BIRC6,CYR61,GNA13,SKIL,ADM
GO:2000232	regulation of rRNA processing	7	12	0.81	0.0115	9606.ENSP00000199320,9606.ENSP00000283109,9606.ENSP00000296792,9606.ENSP00000314193,9606.ENSP00000369162,9606.ENSP00000384302,9606.ENSP00000441214	DIMT1,RIOK2,UTP15,WDR75,RIOK1,WDR43,USP36
GO:1903708	positive regulation of hemopoiesis	32	177	0.3	0.0117	9606.ENSP00000216037,9606.ENSP00000220751,9606.ENSP00000245817,9606.ENSP00000249075,9606.ENSP00000254066,9606.ENSP00000254958,9606.ENSP00000259808,9606.ENSP00000262710,9606.ENSP00000265165,9606.ENSP00000293328,9606.ENSP00000300305,9606.ENSP00000301838,9606.ENSP00000303231,9606.ENSP00000306245,9606.ENSP00000312150,9606.ENSP00000318057,9606.ENSP00000319279,9606.ENSP00000325663,9606.ENSP00000327513,…	XBP1,RIPK2,TNFSF9,LIF,RARA,JAG1,RIPK1,ACIN1,LEF1,STAT5B,RUNX1,FADD,IL12A,FOS,TRIB1,EGR3,MALT1,NFKBIZ,CSF1,DUSP10,PRDM1,JUN,HSPA1B,CD83,ETS1,IL4R,BCL6,FOXO3,CREB1,CYLD,ATXN1L,TRAF6
GO:1902107	positive regulation of leukocyte differentiation	27	139	0.33	0.0118	9606.ENSP00000216037,9606.ENSP00000220751,9606.ENSP00000245817,9606.ENSP00000249075,9606.ENSP00000254066,9606.ENSP00000259808,9606.ENSP00000262710,9606.ENSP00000265165,9606.ENSP00000293328,9606.ENSP00000300305,9606.ENSP00000301838,9606.ENSP00000303231,9606.ENSP00000306245,9606.ENSP00000312150,9606.ENSP00000318057,9606.ENSP00000319279,9606.ENSP00000325663,9606.ENSP00000327513,9606.ENSP00000355866,…	XBP1,RIPK2,TNFSF9,LIF,RARA,RIPK1,ACIN1,LEF1,STAT5B,RUNX1,FADD,IL12A,FOS,TRIB1,EGR3,MALT1,NFKBIZ,CSF1,DUSP10,PRDM1,JUN,CD83,IL4R,BCL6,CREB1,CYLD,TRAF6
GO:0017148	negative regulation of translation	24	117	0.35	0.012	9606.ENSP00000220592,9606.ENSP00000235382,9606.ENSP00000250113,9606.ENSP00000253063,9606.ENSP00000254066,9606.ENSP00000256383,9606.ENSP00000290551,9606.ENSP00000298552,9606.ENSP00000304051,9606.ENSP00000307235,9606.ENSP00000317224,9606.ENSP00000320866,9606.ENSP00000362179,9606.ENSP00000362287,9606.ENSP00000371634,9606.ENSP00000375919,9606.ENSP00000378275,9606.ENSP00000387170,9606.ENSP00000393275,…	AGO2,RGS2,FXR2,SESN2,RARA,EIF2S1,BTG2,TSC1,RNF139,EIF2AK3,SAMD4B,CALR,ZC3H12A,AGO3,IGF2BP2,SAMD4A,PAIP2,GIGYF2,NANOS1,TOB1,CELF1,DAPK3,CPEB2,ZFP36
GO:0060759	regulation of response to cytokine stimulus	30	162	0.31	0.0121	9606.ENSP00000220751,9606.ENSP00000239882,9606.ENSP00000256458,9606.ENSP00000259808,9606.ENSP00000262510,9606.ENSP00000263464,9606.ENSP00000264198,9606.ENSP00000284274,9606.ENSP00000290219,9606.ENSP00000296677,9606.ENSP00000300305,9606.ENSP00000301838,9606.ENSP00000309968,9606.ENSP00000313681,9606.ENSP00000327513,9606.ENSP00000330341,9606.ENSP00000339191,9606.ENSP00000358045,9606.ENSP00000359424,…	RIPK2,ELF1,IRAK2,RIPK1,NLRC5,BIRC3,MUL1,OTULIN,IFNGR2,F2RL1,RUNX1,FADD,ADAM17,SPHK1,CSF1,SOCS3,CAV1,ECM1,CHUK,PTPN1,KLF4,HSPA1B,EDN1,DDX58,GPS2,TAF9,CYLD,BIRC2,TNFAIP3,IKBKG
GO:0035239	tube morphogenesis	83	615	0.17	0.0122	9606.ENSP00000212015,9606.ENSP00000216037,9606.ENSP00000216117,9606.ENSP00000223095,9606.ENSP00000244869,9606.ENSP00000246914,9606.ENSP00000249749,9606.ENSP00000254066,9606.ENSP00000254958,9606.ENSP00000257566,9606.ENSP00000260356,9606.ENSP00000261523,9606.ENSP00000262225,9606.ENSP00000262947,9606.ENSP00000263640,9606.ENSP00000264036,9606.ENSP00000265165,9606.ENSP00000265354,9606.ENSP00000265371,…	SIRT1,XBP1,HMOX1,SERPINE1,EREG,WNK4,DLL4,RARA,JAG1,TBX3,THBS1,RORA,TMED2,C19orf10,ACVR1,MCAM,LEF1,SRF,NRP1,RHOB,DLC1,PAK1,FLT1,NIPBL,OTULIN,ITGA5,TSC1,ANGPTL4,JUNB,LUZP1,CXCL8,EIF2AK3,HEG1,DVL3,EGR3,TNFRSF12A,CSF1,SMAD3,ARID2,GZF1,STARD13,CAV1,PDGFA,NRARP,ADIPOR2,EPHA2,ZEB1,PROX1,KDM5B,AHI1,CTGF,EFNA1,NUS1,ECM1,PRDM1,RBM15,BTRC,BCL10,JUN,DLG5,SDC4,ZC3H12A,BAK1,SPRY2,SHB,KDM6A,BMP2,EDN1,NKX3-1,ETS…
GO:0007167	enzyme linked receptor protein signaling pathway	92	698	0.16	0.0125	9606.ENSP00000212015,9606.ENSP00000216037,9606.ENSP00000224140,9606.ENSP00000230361,9606.ENSP00000230990,9606.ENSP00000237937,9606.ENSP00000238738,9606.ENSP00000239938,9606.ENSP00000240874,9606.ENSP00000244869,9606.ENSP00000249075,9606.ENSP00000251849,9606.ENSP00000252809,9606.ENSP00000260130,9606.ENSP00000263640,9606.ENSP00000263805,9606.ENSP00000264033,9606.ENSP00000264431,9606.ENSP00000265165,…	SIRT1,XBP1,SETX,GUCA1B,HBEGF,ZFAND5,RHOQ,EGR1,KALRN,EREG,LIF,RAF1,GDF15,SDCBP,ACVR1,ZNF106,CBL,RAPGEF2,LEF1,NRP1,GAREM,CSRNP1,PAK1,BTBD11,FLT1,PTPRR,UBASH3B,STAT5B,FGF19,CRK,FNTA,FOS,EIF2AK3,DDIT4,ZCCHC12,ADAM17,USP9X,CSF1,PDGFB,SMAD3,NDEL1,HSP90AA1,TRIO,PDGFA,EPHA2,ANKS1A,SMURF1,MAPKAPK2,AHI1,DDR2,CTGF,F11R,EFNA1,NUS1,SHOC2,JUN,SORBS1,PTPN1,RAPGEF1,PARD3,IRS2,SHB,FLRT3,BMP2,GCNT2,ITSN1,TEC,FAM83…
GO:0010952	positive regulation of peptidase activity	32	178	0.3	0.0125	9606.ENSP00000212015,9606.ENSP00000220751,9606.ENSP00000250457,9606.ENSP00000257787,9606.ENSP00000259808,9606.ENSP00000260442,9606.ENSP00000264198,9606.ENSP00000276297,9606.ENSP00000276431,9606.ENSP00000295992,9606.ENSP00000301838,9606.ENSP00000307235,9606.ENSP00000307786,9606.ENSP00000312455,9606.ENSP00000325448,9606.ENSP00000326119,9606.ENSP00000332973,9606.ENSP00000339191,9606.ENSP00000351777,…	SIRT1,RIPK2,EGLN3,AKIRIN2,RIPK1,BCL2L10,MUL1,DLC1,TNFRSF10B,PCOLCE2,FADD,EIF2AK3,CYCS,CFLAR,KARS,PMAIP1,SMAD3,CAV1,VCP,CTGF,EFNA1,BCL10,MTCH1,BAK1,XDH,NKX3-1,SLC11A2,MBP,PSME4,DIABLO,CYR61,BCL2L13
GO:0048511	rhythmic process	41	250	0.26	0.0125	9606.ENSP00000212015,9606.ENSP00000215917,9606.ENSP00000221452,9606.ENSP00000222553,9606.ENSP00000223095,9606.ENSP00000224140,9606.ENSP00000239938,9606.ENSP00000242057,9606.ENSP00000242480,9606.ENSP00000244869,9606.ENSP00000246672,9606.ENSP00000252818,9606.ENSP00000256495,9606.ENSP00000260187,9606.ENSP00000261523,9606.ENSP00000265372,9606.ENSP00000266304,9606.ENSP00000270162,9606.ENSP00000280614,…	SIRT1,SRRD,RELB,NAMPT,SERPINE1,SETX,EGR1,AHR,EGR2,EREG,NR1D1,JUND,BHLHE40,USP2,RORA,CREM,TEF,SIK1,CCRN4L,STAT5B,NFIL3,NR1D2,PER1,EGR3,PRMT5,PSPC1,NFYA,PROX1,KDM5B,NFKB2,BTRC,JUN,KLF9,ETS1,CSNK1E,KDM5A,ARNTL,FOXO3,CREB1,CLDN4,CRY2
GO:0034249	negative regulation of cellular amide metabolic process	26	133	0.33	0.0134	9606.ENSP00000220592,9606.ENSP00000235382,9606.ENSP00000243045,9606.ENSP00000250113,9606.ENSP00000253063,9606.ENSP00000254066,9606.ENSP00000256383,9606.ENSP00000290551,9606.ENSP00000298552,9606.ENSP00000304051,9606.ENSP00000307235,9606.ENSP00000315130,9606.ENSP00000317224,9606.ENSP00000320866,9606.ENSP00000362179,9606.ENSP00000362287,9606.ENSP00000371634,9606.ENSP00000375919,9606.ENSP00000378275,…	AGO2,RGS2,ORMDL2,FXR2,SESN2,RARA,EIF2S1,BTG2,TSC1,RNF139,EIF2AK3,CLU,SAMD4B,CALR,ZC3H12A,AGO3,IGF2BP2,SAMD4A,PAIP2,GIGYF2,NANOS1,TOB1,CELF1,DAPK3,CPEB2,ZFP36
GO:0045926	negative regulation of growth	39	235	0.26	0.0136	9606.ENSP00000212015,9606.ENSP00000216629,9606.ENSP00000228606,9606.ENSP00000235382,9606.ENSP00000252809,9606.ENSP00000253063,9606.ENSP00000256015,9606.ENSP00000264198,9606.ENSP00000265342,9606.ENSP00000265371,9606.ENSP00000265643,9606.ENSP00000273668,9606.ENSP00000278568,9606.ENSP00000285071,9606.ENSP00000310928,9606.ENSP00000319482,9606.ENSP00000325414,9606.ENSP00000332973,9606.ENSP00000338019,…	SIRT1,BDKRB1,CYP27B1,RGS2,GDF15,SESN2,BTG1,MUL1,FSTL4,NRP1,GAL,EAF2,PAK1,FLCN,PPARD,DCUN1D3,SERTAD3,SMAD3,DNAJB2,JARID2,ADIPOR2,MAP2,ENPP1,OSGIN1,DUSP10,ADRB1,TSPYL2,HSPA1B,ING1,SQSTM1,WWC2,BCL6,CDKN1A,SH3BP4,OSGIN2,PNPT1,PPP2CA,CDKN2AIP,CRYAB
GO:0046330	positive regulation of JNK cascade	25	126	0.34	0.0139	9606.ENSP00000013125,9606.ENSP00000056217,9606.ENSP00000215631,9606.ENSP00000220751,9606.ENSP00000259808,9606.ENSP00000260130,9606.ENSP00000262395,9606.ENSP00000264198,9606.ENSP00000278568,9606.ENSP00000284637,9606.ENSP00000294312,9606.ENSP00000296677,9606.ENSP00000310042,9606.ENSP00000316054,9606.ENSP00000356954,9606.ENSP00000360025,9606.ENSP00000360683,9606.ENSP00000363081,9606.ENSP00000368683,…	MAP4K5,ARHGEF5,GADD45B,RIPK2,RIPK1,SDCBP,TRAF4,MUL1,PAK1,SH3RF1,FGF19,F2RL1,ZNF622,DVL3,CTGF,GADD45A,PTPN1,DKK1,EDN1,HIPK2,TLR6,MAP2K4,CSB-PGBD3,TRAF6,MAP3K9
GO:0048646	anatomical structure formation involved in morphogenesis	106	831	0.15	0.014	9606.ENSP00000164227,9606.ENSP00000212015,9606.ENSP00000216037,9606.ENSP00000216117,9606.ENSP00000223095,9606.ENSP00000230340,9606.ENSP00000239223,9606.ENSP00000240100,9606.ENSP00000242480,9606.ENSP00000244050,9606.ENSP00000244869,9606.ENSP00000249749,9606.ENSP00000254066,9606.ENSP00000254846,9606.ENSP00000254958,9606.ENSP00000257566,9606.ENSP00000260356,9606.ENSP00000261523,9606.ENSP00000261731,…	BCL3,SIRT1,XBP1,HMOX1,SERPINE1,BYSL,DUSP1,DUSP4,EGR2,SNAI1,EREG,DLL4,RARA,KDM6B,JAG1,TBX3,THBS1,RORA,LHX5,TMED2,C19orf10,ACVR1,MCAM,PIKFYVE,LEF1,SRF,NRP1,RHOB,DLC1,FLT1,OTULIN,DUSP2,ITGA5,TSC1,ANGPTL4,JUNB,LUZP1,CXCL8,EIF2AK3,ADAM17,CFLAR,DVL3,EGR3,LAMA3,TNFRSF12A,ALDH1A3,SMAD3,CAV1,POFUT2,TBC1D20,PDGFA,NRARP,ADIPOR2,EPHA2,ETS2,TOPORS,SBNO2,CTR9,PROX1,AHI1,CTGF,EFNA1,NUS1,ECM1,PLEKHO1,DUSP5,RBM15…
GO:0051707	response to other organism	142	1173	0.12	0.0141	9606.ENSP00000064780,9606.ENSP00000164227,9606.ENSP00000216037,9606.ENSP00000216629,9606.ENSP00000216797,9606.ENSP00000220751,9606.ENSP00000221452,9606.ENSP00000223095,9606.ENSP00000226574,9606.ENSP00000227752,9606.ENSP00000228606,9606.ENSP00000229332,9606.ENSP00000232496,9606.ENSP00000234111,9606.ENSP00000239938,9606.ENSP00000245414,9606.ENSP00000245907,9606.ENSP00000246672,9606.ENSP00000248244,…	RELT,BCL3,XBP1,BDKRB1,NFKBIA,RIPK2,RELB,SERPINE1,NFKB1,IL10RA,CYP27B1,CLEC4A,TUSC2,ODC1,EGR1,IRF1,C3,NR1D1,TICAM1,MICB,JUND,RARA,IRAK2,OASL,AKIRIN2,NLRC5,VAMP7,ICAM1,AKAP8,TNFRSF10B,CCRN4L,OTULIN,TRIM11,CA3,IFNGR2,FGF19,REL,CXCL3,CXCL5,F2RL1,CRK,FADD,IL12A,JUNB,CEBPB,PRKCE,FOS,CXCL8,ISG20,PPM1D,DDIT4,PDE12,ADAM17,FOSL1,TNFRSF10D,PPARD,ELF4,TRIB1,NFKBIB,TOLLIP,CLU,STX4,MALT1,PMAIP1,CSF1,IFNLR1,RAB…
GO:0002697	regulation of immune effector process	54	362	0.22	0.0146	9606.ENSP00000216037,9606.ENSP00000216117,9606.ENSP00000220751,9606.ENSP00000234420,9606.ENSP00000245907,9606.ENSP00000252229,9606.ENSP00000254066,9606.ENSP00000261918,9606.ENSP00000262640,9606.ENSP00000263202,9606.ENSP00000263464,9606.ENSP00000264198,9606.ENSP00000282412,9606.ENSP00000293328,9606.ENSP00000296677,9606.ENSP00000300574,9606.ENSP00000301838,9606.ENSP00000303231,9606.ENSP00000304501,…	XBP1,HMOX1,RIPK2,MSH6,C3,MICB,RARA,SEMA7A,VAMP7,UFD1L,BIRC3,MUL1,PPM1B,STAT5B,F2RL1,CRK,FADD,IL12A,ADORA2B,CLCF1,CLU,STX4,SUPT6H,MALT1,KARS,NFKBIZ,IFNLR1,NPLOC4,RIOK3,CREB3,TRIM38,ANKRD17,GPATCH3,DUSP10,BCL10,RAPGEF1,ZC3H12A,HLA-E,DDX58,SERPINB9,RSAD2,SEC14L1,AP1G1,IL4R,BCL6,EXOSC6,PVR,MICA,TRAF6,TRAF3,BIRC2,ITCH,TNFAIP3,NR4A3
GO:1902041	regulation of extrinsic apoptotic signaling pathway via death domain receptors	15	57	0.46	0.0146	9606.ENSP00000216117,9606.ENSP00000223095,9606.ENSP00000251849,9606.ENSP00000259808,9606.ENSP00000260356,9606.ENSP00000264832,9606.ENSP00000276431,9606.ENSP00000301838,9606.ENSP00000312455,9606.ENSP00000317714,9606.ENSP00000326119,9606.ENSP00000344352,9606.ENSP00000357055,9606.ENSP00000415243,9606.ENSP00000481570	HMOX1,SERPINE1,RAF1,RIPK1,THBS1,ICAM1,TNFRSF10B,FADD,CFLAR,STX4,PMAIP1,ATF3,PEA15,SKIL,TNFAIP3
GO:0043433	negative regulation of DNA-binding transcription factor activity	29	157	0.31	0.0148	9606.ENSP00000171111,9606.ENSP00000212015,9606.ENSP00000216117,9606.ENSP00000216797,9606.ENSP00000230321,9606.ENSP00000256458,9606.ENSP00000256495,9606.ENSP00000262294,9606.ENSP00000262510,9606.ENSP00000270162,9606.ENSP00000275015,9606.ENSP00000284274,9606.ENSP00000308578,9606.ENSP00000312150,9606.ENSP00000342136,9606.ENSP00000351789,9606.ENSP00000355925,9606.ENSP00000359206,9606.ENSP00000359424,…	KEAP1,SIRT1,HMOX1,NFKBIA,MDFI,IRAK2,BHLHE40,TRIM37,NLRC5,SIK1,NFKBIE,OTULIN,ZNF431,TRIB1,CREB3,PELI1,PROX1,BTRC,CHUK,ZC3H12A,PIM1,KLF4,MED13,CYLD,BRMS1,DDIT3,TRAF3,ITCH,TNFAIP3
GO:0045184	establishment of protein localization	172	1467	0.11	0.0151	9606.ENSP00000083182,9606.ENSP00000158771,9606.ENSP00000164227,9606.ENSP00000216037,9606.ENSP00000216797,9606.ENSP00000217402,9606.ENSP00000220509,9606.ENSP00000221566,9606.ENSP00000222547,9606.ENSP00000223369,9606.ENSP00000225235,9606.ENSP00000229340,9606.ENSP00000238855,9606.ENSP00000242480,9606.ENSP00000251849,9606.ENSP00000254616,9606.ENSP00000254998,9606.ENSP00000258098,9606.ENSP00000258654,…	APPBP2,DERL2,BCL3,XBP1,NFKBIA,CHMP4B,VPS18,SGTA,BET1,YKT6,TBC1D12,RAB35,AFTPH,EGR2,RAF1,TIMM10B,NXT1,RAB11FIP5,COG3,SDCBP,PREB,FAF2,TRAM1,TMED2,VAMP7,UFD1L,ARFGAP3,SLC7A6OS,ARCN1,GRPEL1,GOLPH3,LSG1,GAL,EXPH5,GET4,SNX19,VPS37B,TRIP11,ARRDC4,PMM2,NPC1,AKAP8,RHOB,RAB5A,YIPF5,SEC24D,PDIA4,BRAF,U2AFBP,STX5,SENP2,F2RL1,LMTK2,AP5Z1,UBAP1,NOL6,SEC61A2,TSC1,DUSP16,HSP90B1,VPS37C,XPO6,RAB24,TVP23B,DDX19A,Y…
GO:0032502	developmental process	554	5401	0.05	0.0155	9606.ENSP00000064780,9606.ENSP00000164024,9606.ENSP00000164133,9606.ENSP00000164227,9606.ENSP00000166139,9606.ENSP00000171111,9606.ENSP00000179259,9606.ENSP00000193322,9606.ENSP00000198767,9606.ENSP00000212015,9606.ENSP00000215631,9606.ENSP00000216037,9606.ENSP00000216038,9606.ENSP00000216117,9606.ENSP00000216489,9606.ENSP00000216797,9606.ENSP00000220592,9606.ENSP00000221452,9606.ENSP00000222329,…	RELT,CELSR3,PPP2R5B,BCL3,FSTL3,KEAP1,C12orf5,OSTM1,RRN3,SIRT1,GADD45B,XBP1,RTCB,HMOX1,ALKBH1,NFKBIA,AGO2,RELB,ERF,SERPINE1,SETX,CYP27B1,RAB35,GCLC,MDFI,BYSL,HBEGF,TUSC2,ODC1,DLX2,MSH6,PRDM2,RGS2,CAMSAP2,RNF103,ZFAND5,DUSP1,ELF1,ALG5,EGR1,DUSP4,KALRN,AHR,EGR2,SNAI1,EREG,IRF1,INSIG2,PLAGL2,NR1D1,WNK4,LIF,DNAJB9,DLL4,MKNK2,RAF1,SAFB2,GDF15,JUND,NUMBL,RARA,DNAJB1,H3F3B,KDM6B,JAG1,MED10,EIF2S1,MBD2,CA…
GO:0046907	intracellular transport	164	1390	0.11	0.0155	9606.ENSP00000083182,9606.ENSP00000158771,9606.ENSP00000164227,9606.ENSP00000216797,9606.ENSP00000217402,9606.ENSP00000220325,9606.ENSP00000220509,9606.ENSP00000222547,9606.ENSP00000223369,9606.ENSP00000225235,9606.ENSP00000229340,9606.ENSP00000237642,9606.ENSP00000242480,9606.ENSP00000254616,9606.ENSP00000254998,9606.ENSP00000257749,9606.ENSP00000258654,9606.ENSP00000260130,9606.ENSP00000260643,…	APPBP2,DERL2,BCL3,NFKBIA,CHMP4B,EHD4,VPS18,BET1,YKT6,TBC1D12,RAB35,STBD1,EGR2,TIMM10B,NXT1,BACH2,COG3,SDCBP,PREB,FAF2,PIK3C3,WIPI1,TRAM1,TMED2,VAMP7,UFD1L,ARFGAP3,ARCN1,CBL,ALS2,PIKFYVE,GRPEL1,LSG1,EXPH5,VPS37B,TRIP11,PMM2,TINAGL1,RHOB,RAB5A,DYNC1LI1,SEC24D,WHAMM,U2AFBP,TRAPPC10,STX5,TGFA,LMTK2,AP5Z1,UBAP1,NOL6,TSC1,DUSP16,HSP90B1,DCTN5,TUBA1A,VPS37C,XPO6,YWHAG,DST,FAM109B,ARFGAP1,CLU,NUP98,USP9X…
GO:1900034	regulation of cellular response to heat	13	45	0.5	0.0155	9606.ENSP00000212015,9606.ENSP00000254322,9606.ENSP00000281938,9606.ENSP00000318687,9606.ENSP00000335153,9606.ENSP00000354558,9606.ENSP00000356070,9606.ENSP00000356549,9606.ENSP00000358081,9606.ENSP00000364801,9606.ENSP00000375711,9606.ENSP00000420514,9606.ENSP00000433560	SIRT1,DNAJB1,HSPB8,HSPH1,HSP90AA1,MTOR,MAPKAPK2,IER5,BAG3,HSPA1B,AKT1S1,BAG1,CRYAB
GO:0009725	response to hormone	108	854	0.14	0.0159	9606.ENSP00000209728,9606.ENSP00000212015,9606.ENSP00000216037,9606.ENSP00000226574,9606.ENSP00000229416,9606.ENSP00000238738,9606.ENSP00000239223,9606.ENSP00000239938,9606.ENSP00000242480,9606.ENSP00000244869,9606.ENSP00000245787,9606.ENSP00000245919,9606.ENSP00000246672,9606.ENSP00000251871,9606.ENSP00000252818,9606.ENSP00000253063,9606.ENSP00000254066,9606.ENSP00000256015,9606.ENSP00000256429,…	CDC6,SIRT1,XBP1,NFKB1,GCLC,RHOQ,DUSP1,EGR1,EGR2,EREG,INSIG2,FOSB,NR1D1,MED17,JUND,SESN2,RARA,BTG1,MBD2,THBS1,RORA,CCNE1,ZNF106,SLC9A1,CBL,ICAM1,SOX30,LEF1,SRF,GAL,EIF2B2,NPC1,AKAP8,SIK1,PAK1,QDPR,BTG2,STAT5B,TSC1,CRK,JUNB,SIK2,PRKCE,FOS,SLC25A33,YWHAG,UQCRFS1,DDIT4,NR1D2,FOSL1,PPARD,CFLAR,CALR,HMGCS1,NDEL1,CAV1,NR4A2,PMEPA1,ADIPOR2,ENPP1,MTOR,CTGF,GCLM,ABCC2,JUN,SORBS1,PTPN1,NCOA3,IRS2,KLF9,ERRFI…
GO:0043409	negative regulation of MAPK cascade	29	158	0.31	0.0159	9606.ENSP00000216037,9606.ENSP00000235382,9606.ENSP00000239223,9606.ENSP00000240100,9606.ENSP00000249075,9606.ENSP00000283228,9606.ENSP00000285071,9606.ENSP00000288943,9606.ENSP00000296677,9606.ENSP00000298573,9606.ENSP00000314420,9606.ENSP00000318687,9606.ENSP00000339191,9606.ENSP00000344352,9606.ENSP00000355866,9606.ENSP00000357392,9606.ENSP00000358140,9606.ENSP00000358596,9606.ENSP00000360683,…	XBP1,RGS2,DUSP1,DUSP4,LIF,PTPRR,FLCN,DUSP2,F2RL1,DUSP16,PER1,HSPH1,CAV1,ATF3,DUSP10,EFNA1,EIF3A,DUSP5,PTPN1,RAPGEF1,KLF4,SPRY2,ERRFI1,GPS2,ASH1L,DUSP8,PPP2CA,CNKSR3,ITCH
GO:0097193	intrinsic apoptotic signaling pathway	29	158	0.31	0.0159	9606.ENSP00000164227,9606.ENSP00000200453,9606.ENSP00000202556,9606.ENSP00000212015,9606.ENSP00000216037,9606.ENSP00000216117,9606.ENSP00000234420,9606.ENSP00000254605,9606.ENSP00000260442,9606.ENSP00000276431,9606.ENSP00000296444,9606.ENSP00000305422,9606.ENSP00000307305,9606.ENSP00000307786,9606.ENSP00000310042,9606.ENSP00000315130,9606.ENSP00000326119,9606.ENSP00000331944,9606.ENSP00000340989,…	BCL3,PPP1R15A,PPP1R13B,SIRT1,XBP1,HMOX1,MSH6,RRP8,BCL2L10,TNFRSF10B,SHISA5,CEBPB,DDIT4,CYCS,ZNF622,CLU,PMAIP1,AEN,SFN,TP53BP2,EPHA2,TOPORS,MCL1,BAK1,CDKN1A,HIPK2,DIABLO,CSB-PGBD3,DDIT3
GO:2000234	positive regulation of rRNA processing	6	9	0.87	0.0164	9606.ENSP00000199320,9606.ENSP00000283109,9606.ENSP00000296792,9606.ENSP00000314193,9606.ENSP00000369162,9606.ENSP00000384302	DIMT1,RIOK2,UTP15,WDR75,RIOK1,WDR43
GO:0070988	demethylation	15	58	0.45	0.0165	9606.ENSP00000216489,9606.ENSP00000254846,9606.ENSP00000350676,9606.ENSP00000356234,9606.ENSP00000367203,9606.ENSP00000370710,9606.ENSP00000376611,9606.ENSP00000382091,9606.ENSP00000382204,9606.ENSP00000382688,9606.ENSP00000386660,9606.ENSP00000386869,9606.ENSP00000394085,9606.ENSP00000432786,9606.ENSP00000442788	ALKBH1,KDM6B,PHF8,KDM5B,KDM6A,JMJD2C,TDG,ALKBH5,JMJD1C,KDM5A,KDM3A,TET3,JMJD6,KDM2A,TET2
GO:0050865	regulation of cell activation	70	506	0.18	0.0167	9606.ENSP00000216037,9606.ENSP00000216117,9606.ENSP00000220751,9606.ENSP00000229416,9606.ENSP00000234420,9606.ENSP00000242057,9606.ENSP00000245414,9606.ENSP00000245817,9606.ENSP00000248244,9606.ENSP00000254066,9606.ENSP00000260356,9606.ENSP00000261523,9606.ENSP00000262640,9606.ENSP00000263056,9606.ENSP00000265643,9606.ENSP00000278568,9606.ENSP00000284273,9606.ENSP00000284637,9606.ENSP00000293328,…	XBP1,HMOX1,RIPK2,GCLC,MSH6,AHR,IRF1,TNFSF9,TICAM1,RARA,THBS1,RORA,VAMP7,MAP3K8,GAL,PAK1,UBASH3B,SH3RF1,STAT5B,F2RL1,RUNX1,FADD,IL12A,ADORA2B,CEBPB,CLCF1,PIBF1,STX4,EGR3,HSPH1,SUPT6H,MALT1,ZNF335,KARS,NFKBIZ,PDGFB,CAV1,RNF41,PDGFA,NRARP,BTN2A2,PELI1,ZEB1,DUSP10,CTGF,PRDM1,BCL10,DLG5,SDC4,ZC3H12A,IRS2,HLA-E,CD83,TEC,CD274,GPNMB,AP1G1,IL4R,BCL6,CDKN1A,TLR6,CYLD,EXOSC6,MICA,TRAF6,RPS6KA1,LDLR,ITCH,TN…
GO:0001525	angiogenesis	46	297	0.23	0.0168	9606.ENSP00000212015,9606.ENSP00000216037,9606.ENSP00000216117,9606.ENSP00000223095,9606.ENSP00000244869,9606.ENSP00000249749,9606.ENSP00000254958,9606.ENSP00000260356,9606.ENSP00000261523,9606.ENSP00000262947,9606.ENSP00000263640,9606.ENSP00000264036,9606.ENSP00000265165,9606.ENSP00000265354,9606.ENSP00000265371,9606.ENSP00000272233,9606.ENSP00000282397,9606.ENSP00000284274,9606.ENSP00000293379,…	SIRT1,XBP1,HMOX1,SERPINE1,EREG,DLL4,JAG1,THBS1,RORA,C19orf10,ACVR1,MCAM,LEF1,SRF,NRP1,RHOB,FLT1,OTULIN,ITGA5,ANGPTL4,CXCL8,EIF2AK3,EGR3,TNFRSF12A,CAV1,PDGFA,NRARP,ADIPOR2,EPHA2,CTGF,EFNA1,NUS1,ECM1,RBM15,JUN,ZC3H12A,SHB,EDN1,ETS1,SETD2,C1GALT1,JMJD6,CYR61,GNA13,SHC1,NR4A1
GO:0002376	immune system process	262	2370	0.09	0.0168	9606.ENSP00000056217,9606.ENSP00000064780,9606.ENSP00000075120,9606.ENSP00000164227,9606.ENSP00000166139,9606.ENSP00000193322,9606.ENSP00000212015,9606.ENSP00000216037,9606.ENSP00000216117,9606.ENSP00000216797,9606.ENSP00000218516,9606.ENSP00000219313,9606.ENSP00000220751,9606.ENSP00000221452,9606.ENSP00000226574,9606.ENSP00000228606,9606.ENSP00000229332,9606.ENSP00000229340,9606.ENSP00000232496,…	ARHGEF5,RELT,SLC2A3,BCL3,FSTL3,OSTM1,SIRT1,XBP1,HMOX1,NFKBIA,GLA,PSMD7,RIPK2,RELB,NFKB1,CYP27B1,CLEC4A,RAB35,TUSC2,MSH6,STBD1,EGR1,IRF1,TNFSF9,C3,TICAM1,LIF,DNAJB9,DLL4,MKNK2,RAF1,MICB,KDM6B,JAG1,IRAK2,OASL,AKIRIN2,RIPK1,SDCBP,THBS1,RORA,SLC7A5,PSMD11,SEMA7A,FAF2,PIK3C3,NLRC5,VAMP7,ACIN1,MAP3K8,IL1A,SLC7A6OS,CBL,PSMD3,ICAM1,GOLPH3,LEF1,SRF,EIF2B2,RHOF,CRTC3,AKAP8,TINAGL1,DYNC1LI1,FTH1,TNFRSF10B,C…
GO:0006919	activation of cysteine-type endopeptidase activity involved in apoptotic process	19	85	0.39	0.0168	9606.ENSP00000250457,9606.ENSP00000259808,9606.ENSP00000260442,9606.ENSP00000264198,9606.ENSP00000276297,9606.ENSP00000276431,9606.ENSP00000301838,9606.ENSP00000307235,9606.ENSP00000307786,9606.ENSP00000326119,9606.ENSP00000332973,9606.ENSP00000351777,9606.ENSP00000362730,9606.ENSP00000363591,9606.ENSP00000368727,9606.ENSP00000370253,9606.ENSP00000378364,9606.ENSP00000398495,9606.ENSP00000480836	EGLN3,RIPK1,BCL2L10,MUL1,DLC1,TNFRSF10B,FADD,EIF2AK3,CYCS,PMAIP1,SMAD3,VCP,MTCH1,BAK1,XDH,NKX3-1,SLC11A2,DIABLO,BCL2L13
GO:0071705	nitrogen compound transport	194	1690	0.1	0.0172	9606.ENSP00000083182,9606.ENSP00000158771,9606.ENSP00000164227,9606.ENSP00000216037,9606.ENSP00000216797,9606.ENSP00000217402,9606.ENSP00000220509,9606.ENSP00000222547,9606.ENSP00000223369,9606.ENSP00000225235,9606.ENSP00000229340,9606.ENSP00000234256,9606.ENSP00000236137,9606.ENSP00000237612,9606.ENSP00000238855,9606.ENSP00000240333,9606.ENSP00000242480,9606.ENSP00000251849,9606.ENSP00000254616,…	APPBP2,DERL2,BCL3,XBP1,NFKBIA,CHMP4B,VPS18,BET1,YKT6,TBC1D12,RAB35,SLC1A4,SLC19A2,ABCG2,AFTPH,SLC35B1,EGR2,RAF1,TIMM10B,NXT1,RAB11FIP5,COG3,SDCBP,PREB,SLC7A5,FAF2,TRAM1,TMED2,VAMP7,UFD1L,ARFGAP3,SLC7A6OS,ARCN1,GRPEL1,GOLPH3,LSG1,GAL,EXPH5,SNX19,VPS37B,TRIP11,ARRDC4,PMM2,AKAP8,RHOB,RAB5A,YIPF5,NFKBIE,SLC22A3,SEC24D,SLC7A11,SLC25A4,PDIA4,U2AFBP,STX5,SENP2,F2RL1,LMTK2,AP5Z1,SLC25A32,UBAP1,NOL6,AQP3,…
GO:0006888	endoplasmic reticulum to Golgi vesicle-mediated transport	31	175	0.29	0.0174	9606.ENSP00000222547,9606.ENSP00000223369,9606.ENSP00000258654,9606.ENSP00000260643,9606.ENSP00000262225,9606.ENSP00000262640,9606.ENSP00000263245,9606.ENSP00000264028,9606.ENSP00000273130,9606.ENSP00000280551,9606.ENSP00000286760,9606.ENSP00000291574,9606.ENSP00000294179,9606.ENSP00000295400,9606.ENSP00000300087,9606.ENSP00000314615,9606.ENSP00000325827,9606.ENSP00000330945,9606.ENSP00000338844,…	BET1,YKT6,COG3,PREB,TMED2,VAMP7,ARFGAP3,ARCN1,DYNC1LI1,SEC24D,WHAMM,TRAPPC10,STX5,TGFA,DCTN5,ARFGAP1,SEC16A,TMED9,SEC23B,TBC1D20,DYNC1H1,VCP,SEC23IP,GBF1,BET1L,GOLGB1,SEC31A,SEC24A,MCFD2,SCFD1,USO1
GO:0022407	regulation of cell-cell adhesion	54	366	0.21	0.0174	9606.ENSP00000166139,9606.ENSP00000216037,9606.ENSP00000220751,9606.ENSP00000245414,9606.ENSP00000245817,9606.ENSP00000254066,9606.ENSP00000254958,9606.ENSP00000257527,9606.ENSP00000263056,9606.ENSP00000264832,9606.ENSP00000265165,9606.ENSP00000278568,9606.ENSP00000284273,9606.ENSP00000293328,9606.ENSP00000300305,9606.ENSP00000301838,9606.ENSP00000303231,9606.ENSP00000305422,9606.ENSP00000315630,…	FSTL3,XBP1,RIPK2,IRF1,TNFSF9,RARA,JAG1,ADAM19,MAP3K8,ICAM1,LEF1,PAK1,UBASH3B,STAT5B,RUNX1,FADD,IL12A,CEBPB,SWAP70,EGR3,HSPH1,MALT1,NFKBIZ,CAV1,NRARP,BTN2A2,PELI1,DUSP10,BCL10,PPAP2B,DLG5,SDC4,ZC3H12A,KLF4,HLA-E,BMP2,CD83,RGCC,GCNT2,CD274,GPNMB,MYADM,ETS1,IL4R,MBP,RDX,BCL6,CYLD,MYO10,TENM3,TRAF6,CITED2,ITCH,NR4A3
GO:0035335	peptidyl-tyrosine dephosphorylation	21	100	0.36	0.0182	9606.ENSP00000239223,9606.ENSP00000240100,9606.ENSP00000283228,9606.ENSP00000284273,9606.ENSP00000288943,9606.ENSP00000298573,9606.ENSP00000303706,9606.ENSP00000315713,9606.ENSP00000344909,9606.ENSP00000354916,9606.ENSP00000355866,9606.ENSP00000356920,9606.ENSP00000358596,9606.ENSP00000360108,9606.ENSP00000360683,9606.ENSP00000362978,9606.ENSP00000365528,9606.ENSP00000380530,9606.ENSP00000383089,…	DUSP1,DUSP4,PTPRR,UBASH3B,DUSP2,DUSP16,CDC25A,SSH1,PTP4A2,CDC14A,DUSP10,DUSP12,DUSP5,DNAJC6,PTPN1,EYA3,PTPRH,DUSP8,TPTE2,MTMR3,PTPN21
GO:0031667	response to nutrient levels	64	455	0.19	0.0185	9606.ENSP00000212015,9606.ENSP00000215904,9606.ENSP00000216037,9606.ENSP00000216117,9606.ENSP00000228606,9606.ENSP00000229416,9606.ENSP00000252809,9606.ENSP00000253063,9606.ENSP00000254066,9606.ENSP00000254605,9606.ENSP00000256383,9606.ENSP00000256429,9606.ENSP00000261292,9606.ENSP00000262039,9606.ENSP00000264033,9606.ENSP00000264832,9606.ENSP00000265354,9606.ENSP00000266458,9606.ENSP00000275300,…	SIRT1,PDXP,XBP1,HMOX1,CYP27B1,GCLC,GDF15,SESN2,RARA,RRP8,EIF2S1,MBD2,LIPG,PIK3C3,CBL,ICAM1,SRF,GABARAPL1,SLC22A3,CDKN2B,AQP3,TSC1,HSP90B1,FOXA3,PPM1D,EIF2AK3,TBL2,PPARD,SSH1,HMGCS1,HSPA5,PMAIP1,UPP1,CAV1,MIOS,ATF3,ADIPOR2,P2RX4,MTOR,PROX1,NUAK2,ADRB1,GCLM,BCL10,JUN,RRAGC,SLC25A25,ZC3H12A,PIM1,NFE2L2,RELA,MTMR3,CDKN1A,FOXO3,CREB1,ATP2B1,CADPS2,FNIP1,ADM,DDIT3,ZFYVE1,LDLR,ZFP36,BHLHA15
GO:0032872	regulation of stress-activated MAPK cascade	35	208	0.27	0.0188	9606.ENSP00000013125,9606.ENSP00000056217,9606.ENSP00000215631,9606.ENSP00000220751,9606.ENSP00000259808,9606.ENSP00000260130,9606.ENSP00000262395,9606.ENSP00000264198,9606.ENSP00000278568,9606.ENSP00000284637,9606.ENSP00000294312,9606.ENSP00000296677,9606.ENSP00000310042,9606.ENSP00000314420,9606.ENSP00000316054,9606.ENSP00000318687,9606.ENSP00000325448,9606.ENSP00000355866,9606.ENSP00000356954,…	MAP4K5,ARHGEF5,GADD45B,RIPK2,RIPK1,SDCBP,TRAF4,MUL1,PAK1,SH3RF1,FGF19,F2RL1,ZNF622,PER1,DVL3,HSPH1,KARS,DUSP10,CTGF,GADD45A,PTPN1,RAPGEF1,ZC3H12A,DKK1,BMP2,EDN1,XDH,GPS2,HIPK2,TLR6,MAP2K4,CSB-PGBD3,TRAF6,MAP3K9,ITCH
GO:0016577	histone demethylation	10	29	0.58	0.0194	9606.ENSP00000254846,9606.ENSP00000350676,9606.ENSP00000356234,9606.ENSP00000367203,9606.ENSP00000370710,9606.ENSP00000382204,9606.ENSP00000382688,9606.ENSP00000386660,9606.ENSP00000394085,9606.ENSP00000432786	KDM6B,PHF8,KDM5B,KDM6A,JMJD2C,JMJD1C,KDM5A,KDM3A,JMJD6,KDM2A
GO:1903706	regulation of hemopoiesis	59	412	0.2	0.0194	9606.ENSP00000166139,9606.ENSP00000216037,9606.ENSP00000216797,9606.ENSP00000220751,9606.ENSP00000245414,9606.ENSP00000245817,9606.ENSP00000249075,9606.ENSP00000254066,9606.ENSP00000254810,9606.ENSP00000254958,9606.ENSP00000259808,9606.ENSP00000260356,9606.ENSP00000262710,9606.ENSP00000265165,9606.ENSP00000281708,9606.ENSP00000284273,9606.ENSP00000284637,9606.ENSP00000285071,9606.ENSP00000293328,…	FSTL3,XBP1,NFKBIA,RIPK2,IRF1,TNFSF9,LIF,RARA,H3F3B,JAG1,RIPK1,THBS1,ACIN1,LEF1,FBXW7,UBASH3B,SH3RF1,FLCN,STAT5B,MITF,RUNX1,FADD,IL12A,CEBPB,FOS,TRIB1,TFE3,EGR3,MALT1,NFKBIZ,CSF1,TOB2,RNF41,NRARP,ZEB1,MTOR,CTR9,DUSP10,PRDM1,RBM15,JUN,ZC3H12A,AGO3,HSPA1B,CD83,ETS1,IL4R,NFE2L2,BCL6,FOXO3,CREB1,CYLD,ATXN1L,FNIP1,TRAF6,CNOT4,ZFP36,ITCH,NR4A3
GO:0018193	peptidyl-amino acid modification	106	842	0.14	0.0195	9606.ENSP00000212015,9606.ENSP00000216267,9606.ENSP00000220751,9606.ENSP00000222803,9606.ENSP00000225174,9606.ENSP00000228437,9606.ENSP00000229395,9606.ENSP00000230990,9606.ENSP00000235372,9606.ENSP00000239891,9606.ENSP00000242480,9606.ENSP00000244869,9606.ENSP00000249075,9606.ENSP00000250457,9606.ENSP00000250896,9606.ENSP00000253329,9606.ENSP00000255304,9606.ENSP00000259808,9606.ENSP00000260505,…	SIRT1,BRD1,RIPK2,FKBP14,PPIF,PRDM4,FGFR1OP2,HBEGF,PRDM2,ALG5,EGR2,EREG,LIF,EGLN3,MKNK2,PPIL4,USPL1,RIPK1,TTLL7,NAA25,CFAP20,EPC1,ACVR1,ARID4B,MUL1,LEF1,NRP1,ESCO1,SCYL1,PLK2,DPH7,FLT1,NSMCE2,STAT5B,RPN1,SENP2,LMTK2,TPST1,PRKCE,EIF2AK3,MGAT2,TADA2B,PRMT9,PER1,TLK2,CLK4,PIBF1,PRMT5,ZNF335,P4HB,ATAT1,PDGFB,HSP90AA1,BAZ1B,MAP2K3,ARID4A,ZDHHC9,BRPF3,EPHA2,VCP,TOPORS,MTOR,CTR9,MAPKAPK2,DYRK3,SGK1,DDR2,…
GO:0042886	amide transport	168	1440	0.11	0.0199	9606.ENSP00000083182,9606.ENSP00000158771,9606.ENSP00000164227,9606.ENSP00000216037,9606.ENSP00000216797,9606.ENSP00000217402,9606.ENSP00000220509,9606.ENSP00000222547,9606.ENSP00000223369,9606.ENSP00000225235,9606.ENSP00000229340,9606.ENSP00000236137,9606.ENSP00000238855,9606.ENSP00000242480,9606.ENSP00000251849,9606.ENSP00000254616,9606.ENSP00000254998,9606.ENSP00000258098,9606.ENSP00000258654,…	APPBP2,DERL2,BCL3,XBP1,NFKBIA,CHMP4B,VPS18,BET1,YKT6,TBC1D12,RAB35,SLC19A2,AFTPH,EGR2,RAF1,TIMM10B,NXT1,RAB11FIP5,COG3,SDCBP,PREB,FAF2,TRAM1,TMED2,VAMP7,UFD1L,ARFGAP3,SLC7A6OS,ARCN1,GRPEL1,GOLPH3,LSG1,GAL,EXPH5,SNX19,VPS37B,TRIP11,ARRDC4,PMM2,AKAP8,RHOB,RAB5A,YIPF5,SEC24D,PDIA4,U2AFBP,STX5,SENP2,F2RL1,LMTK2,AP5Z1,SLC25A32,UBAP1,NOL6,AQP3,SEC61A2,TSC1,DUSP16,HSP90B1,VPS37C,XPO6,RAB24,TVP23B,DDX19A…
GO:0046328	regulation of JNK cascade	30	169	0.29	0.0199	9606.ENSP00000013125,9606.ENSP00000056217,9606.ENSP00000215631,9606.ENSP00000220751,9606.ENSP00000259808,9606.ENSP00000260130,9606.ENSP00000262395,9606.ENSP00000264198,9606.ENSP00000278568,9606.ENSP00000284637,9606.ENSP00000294312,9606.ENSP00000296677,9606.ENSP00000310042,9606.ENSP00000314420,9606.ENSP00000316054,9606.ENSP00000355866,9606.ENSP00000356954,9606.ENSP00000360025,9606.ENSP00000360683,…	MAP4K5,ARHGEF5,GADD45B,RIPK2,RIPK1,SDCBP,TRAF4,MUL1,PAK1,SH3RF1,FGF19,F2RL1,ZNF622,PER1,DVL3,DUSP10,CTGF,GADD45A,PTPN1,RAPGEF1,DKK1,EDN1,GPS2,HIPK2,TLR6,MAP2K4,CSB-PGBD3,TRAF6,MAP3K9,ITCH
GO:0016197	endosomal transport	32	185	0.28	0.0201	9606.ENSP00000217402,9606.ENSP00000220325,9606.ENSP00000223369,9606.ENSP00000229340,9606.ENSP00000264276,9606.ENSP00000264380,9606.ENSP00000267202,9606.ENSP00000271064,9606.ENSP00000291574,9606.ENSP00000294179,9606.ENSP00000297293,9606.ENSP00000297562,9606.ENSP00000297661,9606.ENSP00000301765,9606.ENSP00000312753,9606.ENSP00000318629,9606.ENSP00000323687,9606.ENSP00000328524,9606.ENSP00000351777,…	CHMP4B,EHD4,YKT6,RAB35,ALS2,PIKFYVE,VPS37B,TINAGL1,TRAPPC10,STX5,LMTK2,AP5Z1,UBAP1,VPS37C,FAM109B,VPS37A,UBE2O,DENND5A,VCP,GBF1,STX16,STAM,ARHGAP44,BET1L,LYST,SQSTM1,RIC1,RAB9A,UBC,ERC1,EHD1,CLTC
GO:0009719	response to endogenous stimulus	159	1353	0.11	0.0203	9606.ENSP00000209728,9606.ENSP00000212015,9606.ENSP00000215904,9606.ENSP00000216037,9606.ENSP00000220751,9606.ENSP00000224140,9606.ENSP00000226574,9606.ENSP00000229340,9606.ENSP00000229416,9606.ENSP00000238738,9606.ENSP00000239223,9606.ENSP00000239938,9606.ENSP00000242057,9606.ENSP00000242480,9606.ENSP00000244869,9606.ENSP00000245787,9606.ENSP00000245919,9606.ENSP00000246672,9606.ENSP00000248244,…	CDC6,SIRT1,PDXP,XBP1,RIPK2,SETX,NFKB1,RAB35,GCLC,RHOQ,DUSP1,EGR1,AHR,EGR2,EREG,INSIG2,FOSB,NR1D1,TICAM1,DLL4,MED17,GDF15,JUND,SESN2,RARA,BTG1,MBD2,THBS1,RORA,CCNE1,ACVR1,ZNF106,SLC9A1,CBL,RAPGEF2,ICAM1,SOX30,LEF1,SRF,GAL,EIF2B2,GAREM,NPC1,AKAP8,SIK1,PAK1,QDPR,BTG2,STAT5B,FGF19,TSC1,HSP90B1,CRK,JUNB,FNTA,CEBPB,SIK2,PRKCE,FOS,SLC25A33,YWHAG,UQCRFS1,CXCL8,DDIT4,ZCCHC12,NR1D2,FOSL1,PPARD,CFLAR,SSH1,U…
GO:0031330	negative regulation of cellular catabolic process	38	234	0.25	0.0204	9606.ENSP00000158771,9606.ENSP00000179259,9606.ENSP00000185150,9606.ENSP00000216117,9606.ENSP00000217402,9606.ENSP00000221086,9606.ENSP00000221566,9606.ENSP00000260130,9606.ENSP00000262384,9606.ENSP00000269228,9606.ENSP00000280614,9606.ENSP00000296343,9606.ENSP00000298552,9606.ENSP00000307305,9606.ENSP00000316512,9606.ENSP00000326813,9606.ENSP00000331907,9606.ENSP00000342755,9606.ENSP00000346986,…	DERL2,C12orf5,ERLEC1,HMOX1,CHMP4B,MTMR9,SGTA,SDCBP,N4BP1,NPC1,CCRN4L,KIAA0226,TSC1,DDIT4,TLK2,YOD1,DHX34,RNF41,WAC,MTOR,LRIG2,MAPKAPK2,EFNA1,MCL1,FAM46C,TRIM39,TAF9,USP25,HIPK2,HERC1,SCFD1,RIC1,RYBP,SH3RF2,TOB1,USP36,UBE2J1,ZFP36
GO:0060544	regulation of necroptotic process	7	14	0.74	0.0204	9606.ENSP00000259808,9606.ENSP00000263464,9606.ENSP00000281456,9606.ENSP00000301838,9606.ENSP00000312455,9606.ENSP00000339191,9606.ENSP00000477613	RIPK1,BIRC3,SLC25A4,FADD,CFLAR,CAV1,BIRC2
GO:0008283	cell population proliferation	88	676	0.16	0.0205	9606.ENSP00000198767,9606.ENSP00000216037,9606.ENSP00000216117,9606.ENSP00000220751,9606.ENSP00000228437,9606.ENSP00000230340,9606.ENSP00000232496,9606.ENSP00000239938,9606.ENSP00000240874,9606.ENSP00000244869,9606.ENSP00000245817,9606.ENSP00000251849,9606.ENSP00000252891,9606.ENSP00000254250,9606.ENSP00000254810,9606.ENSP00000255304,9606.ENSP00000261292,9606.ENSP00000261523,9606.ENSP00000261731,…	RRN3,XBP1,HMOX1,RIPK2,PRDM4,BYSL,TUSC2,EGR1,KALRN,EREG,TNFSF9,RAF1,NUMBL,THAP1,H3F3B,USPL1,LIPG,RORA,LHX5,IL1A,MXD1,GOLPH3,LEF1,PELO,TGFA,F2RL1,DAGLB,RUNX1,IL12A,JUNB,CDC25A,CEBPB,ISG20,DDIT4,PPARD,ELF4,DAB2,CLU,PRMT5,MALT1,C3orf58,CSF1,NDEL1,ARID2,INSIG1,NRD1,NRARP,EPHA2,ZEB1,CDC14A,NAA35,PROX1,IRF6,DDR2,CTGF,YY1AP1,PRDM1,ASCC3,BTRC,ZNF503,PIM1,BAK1,IRS2,PIM2,BMP2,PAK1IP1,NKX3-1,IGFBP3,SDCBP2,DM…
GO:0009056	catabolic process	210	1859	0.09	0.021	9606.ENSP00000158771,9606.ENSP00000171111,9606.ENSP00000179259,9606.ENSP00000185150,9606.ENSP00000212015,9606.ENSP00000215904,9606.ENSP00000216037,9606.ENSP00000216117,9606.ENSP00000217402,9606.ENSP00000218516,9606.ENSP00000219313,9606.ENSP00000220509,9606.ENSP00000221403,9606.ENSP00000221566,9606.ENSP00000228606,9606.ENSP00000231668,9606.ENSP00000237455,9606.ENSP00000237642,9606.ENSP00000242719,…	DERL2,KEAP1,C12orf5,ERLEC1,SIRT1,PDXP,XBP1,HMOX1,CHMP4B,GLA,PSMD7,VPS18,DHDH,SGTA,CYP27B1,BNIP1,RNF103,STBD1,RNF11,NR1D1,FBXL12,SDF2L1,DNAJB9,SESN2,RNF122,EDEM1,KIAA0368,RIPK1,USP2,MMP13,LIPG,LPIN2,PSMD11,FAF2,PIK3C3,WIPI1,UFD1L,SLC9A1,CBL,PSMD3,GET4,GABARAPL1,VPS37B,C18orf8,NPC1,PELO,NRBF2,CCRN4L,BTBD11,QDPR,FBXW7,USP12,PRKAG2,CBR3,TMEM199,CHAC2,WDFY3,KIAA0226,DAGLB,UBAP1,HSP90B1,KCTD5,VPS37C,RN…
GO:0032102	negative regulation of response to external stimulus	47	310	0.22	0.021	9606.ENSP00000223095,9606.ENSP00000226574,9606.ENSP00000252229,9606.ENSP00000257604,9606.ENSP00000260356,9606.ENSP00000261523,9606.ENSP00000262510,9606.ENSP00000263202,9606.ENSP00000264198,9606.ENSP00000265371,9606.ENSP00000269856,9606.ENSP00000282412,9606.ENSP00000284273,9606.ENSP00000284274,9606.ENSP00000300574,9606.ENSP00000310928,9606.ENSP00000312150,9606.ENSP00000315731,9606.ENSP00000330341,…	SERPINE1,NFKB1,MICB,TRAFD1,THBS1,RORA,NLRC5,UFD1L,MUL1,NRP1,FEM1A,PPM1B,UBASH3B,OTULIN,CRK,PPARD,TRIB1,METRNL,SOCS3,PDGFB,NPLOC4,SMAD3,PLAUR,RIOK3,PDGFA,TRIM38,GPATCH3,LRIG2,DUSP10,PRDM1,PLAU,ZC3H12A,KLF4,HLA-E,EDN1,SERPINB9,GPS2,ASH1L,SEC14L1,ETS1,VIMP,PHLDB2,MICA,MVK,LDLR,ITCH,TNFAIP3
GO:0007165	signal transduction	489	4738	0.06	0.0212	9606.ENSP00000013125,9606.ENSP00000014914,9606.ENSP00000033079,9606.ENSP00000056217,9606.ENSP00000064780,9606.ENSP00000158771,9606.ENSP00000164024,9606.ENSP00000164133,9606.ENSP00000164227,9606.ENSP00000200453,9606.ENSP00000202556,9606.ENSP00000212015,9606.ENSP00000216037,9606.ENSP00000216117,9606.ENSP00000216373,9606.ENSP00000216629,9606.ENSP00000216797,9606.ENSP00000220507,9606.ENSP00000220592,…	MAP4K5,GPRC5A,FAM13B,ARHGEF5,RELT,DERL2,CELSR3,PPP2R5B,BCL3,PPP1R15A,PPP1R13B,SIRT1,XBP1,HMOX1,SOS2,BDKRB1,NFKBIA,RHOV,AGO2,RIPK2,RELB,NAMPT,FKBP14,SETX,RASD1,AKAP10,NFKB1,IL10RA,PRDM4,CLEC4A,GUCA1B,HBEGF,MSH6,ZFAND5,RHOQ,DUSP1,EGR1,KALRN,AHR,SNAI1,EREG,IRF1,INSIG2,TNFSF9,C3,NR1D1,WNK4,TICAM1,LIF,DNAJB9,DLL4,MKNK2,RAF1,MED17,MICB,GDF15,NUMBL,SESN2,RARA,RHPN2,RRP8,JAG1,EIF2S1,IRAK2,EDEM1,OASL,RIPK…
GO:0010608	posttranscriptional regulation of gene expression	62	441	0.19	0.0212	9606.ENSP00000164227,9606.ENSP00000200453,9606.ENSP00000216489,9606.ENSP00000220592,9606.ENSP00000235382,9606.ENSP00000250113,9606.ENSP00000250896,9606.ENSP00000253063,9606.ENSP00000254066,9606.ENSP00000256383,9606.ENSP00000260356,9606.ENSP00000266126,9606.ENSP00000277540,9606.ENSP00000280614,9606.ENSP00000290551,9606.ENSP00000296215,9606.ENSP00000298552,9606.ENSP00000304051,9606.ENSP00000307235,…	BCL3,PPP1R15A,ALKBH1,AGO2,RGS2,FXR2,MKNK2,SESN2,RARA,EIF2S1,THBS1,EIF2B2,DPH7,CCRN4L,BTG2,SNIP1,TSC1,RNF139,EIF2AK3,RPS6KB2,PDE12,TRMT10C,PER1,SAMD4B,CALR,SMAD3,KLHL25,CAV1,YTHDC1,PIWIL2,NUP214,ETF1,MTOR,MAPKAPK2,PPP1R15B,FAM46C,ZC3H12A,AGO3,HABP4,ZCCHC6,GCNT2,IGF2BP2,SAMD4A,PAIP2,FOXO3,GIGYF2,NANOS1,EIF2B4,EXOSC6,ZNF598,TOB1,CLP1,RPS6KA1,CELF1,UBC,DAPK3,CPEB2,WTIP,ZFP36,MPV17L2,DNAJC3,DCP1A
GO:0061041	regulation of wound healing	24	124	0.33	0.0213	9606.ENSP00000216037,9606.ENSP00000223095,9606.ENSP00000230990,9606.ENSP00000260356,9606.ENSP00000284273,9606.ENSP00000296677,9606.ENSP00000300574,9606.ENSP00000306124,9606.ENSP00000310928,9606.ENSP00000326737,9606.ENSP00000330382,9606.ENSP00000332973,9606.ENSP00000339191,9606.ENSP00000339328,9606.ENSP00000346508,9606.ENSP00000354558,9606.ENSP00000355866,9606.ENSP00000360296,9606.ENSP00000361850,…	XBP1,SERPINE1,HBEGF,THBS1,UBASH3B,F2RL1,CRK,PRKCE,PPARD,TNFRSF12A,PDGFB,SMAD3,CAV1,PLAUR,PDGFA,MTOR,DUSP10,PPAP2B,PLAU,EDN1,TEC,NFE2L2,PHLDB2,TNFAIP3
GO:0016043	cellular component organization	529	5163	0.05	0.0216	9606.ENSP00000009041,9606.ENSP00000053468,9606.ENSP00000056217,9606.ENSP00000163416,9606.ENSP00000164024,9606.ENSP00000164227,9606.ENSP00000198767,9606.ENSP00000200453,9606.ENSP00000202556,9606.ENSP00000212015,9606.ENSP00000215904,9606.ENSP00000216037,9606.ENSP00000216117,9606.ENSP00000216267,9606.ENSP00000216489,9606.ENSP00000217402,9606.ENSP00000218176,9606.ENSP00000220325,9606.ENSP00000220509,…	STARD3NL,MRPS10,ARHGEF5,GOLGA5,CELSR3,BCL3,RRN3,PPP1R15A,PPP1R13B,SIRT1,PDXP,XBP1,HMOX1,BRD1,ALKBH1,CHMP4B,KCND1,EHD4,VPS18,AGO2,BRF2,SGTA,BET1,SERPINE1,YKT6,SETX,PPIF,PRDM4,RAB35,GCLC,BNIP1,GORASP2,PRDM2,CAMSAP2,RHOQ,KALRN,EGR2,SNAI1,EREG,C3,PLAGL2,RAF1,NUMBL,SESN2,GRWD1,DNHD1,RRP8,TIMM10B,H3F3B,KDM6B,IGHMBP2,USPL1,ACTR3B,EIF2S1,MBD2,ADAM19,COG3,KIAA0368,TOR1B,RIPK1,SDCBP,MMP13,THBS1,HAUS2,PREB,…
GO:0043618	regulation of transcription from RNA polymerase II promoter in response to stress	16	67	0.42	0.0216	9606.ENSP00000216037,9606.ENSP00000216117,9606.ENSP00000239938,9606.ENSP00000250457,9606.ENSP00000253063,9606.ENSP00000254322,9606.ENSP00000305422,9606.ENSP00000324173,9606.ENSP00000344352,9606.ENSP00000358081,9606.ENSP00000360266,9606.ENSP00000380252,9606.ENSP00000382805,9606.ENSP00000441543,9606.ENSP00000444198,9606.ENSP00000448665	XBP1,HMOX1,EGR1,EGLN3,SESN2,DNAJB1,CEBPB,HSPA5,ATF3,BAG3,JUN,NFE2L2,BACH1,UBC,CITED2,DDIT3
GO:1903051	negative regulation of proteolysis involved in cellular protein catabolic process	16	67	0.42	0.0216	9606.ENSP00000158771,9606.ENSP00000185150,9606.ENSP00000221566,9606.ENSP00000260130,9606.ENSP00000262384,9606.ENSP00000316512,9606.ENSP00000326813,9606.ENSP00000346986,9606.ENSP00000357392,9606.ENSP00000365844,9606.ENSP00000370201,9606.ENSP00000383044,9606.ENSP00000385571,9606.ENSP00000419494,9606.ENSP00000424497,9606.ENSP00000451261	DERL2,ERLEC1,SGTA,SDCBP,N4BP1,TLK2,YOD1,WAC,EFNA1,TRIM39,TAF9,USP25,HIPK2,RYBP,SH3RF2,UBE2J1
GO:0045428	regulation of nitric oxide biosynthetic process	14	54	0.46	0.0219	9606.ENSP00000218516,9606.ENSP00000248244,9606.ENSP00000264832,9606.ENSP00000315130,9606.ENSP00000332973,9606.ENSP00000335153,9606.ENSP00000339191,9606.ENSP00000353032,9606.ENSP00000354558,9606.ENSP00000355133,9606.ENSP00000362179,9606.ENSP00000363804,9606.ENSP00000368683,9606.ENSP00000389600	GLA,TICAM1,ICAM1,CLU,SMAD3,HSP90AA1,CAV1,P2RX4,MTOR,NOS1AP,ZC3H12A,KLF4,EDN1,TLR6
GO:0045927	positive regulation of growth	40	252	0.24	0.022	9606.ENSP00000158771,9606.ENSP00000230990,9606.ENSP00000254810,9606.ENSP00000260130,9606.ENSP00000261918,9606.ENSP00000262198,9606.ENSP00000263847,9606.ENSP00000263980,9606.ENSP00000264198,9606.ENSP00000265165,9606.ENSP00000265354,9606.ENSP00000265371,9606.ENSP00000278568,9606.ENSP00000282516,9606.ENSP00000293328,9606.ENSP00000300574,9606.ENSP00000306328,9606.ENSP00000309968,9606.ENSP00000310928,…	DERL2,HBEGF,H3F3B,SDCBP,SEMA7A,ADNP2,OSBP,SLC9A1,MUL1,LEF1,SRF,NRP1,PAK1,NIPBL,STAT5B,CRK,SLC25A33,ADAM17,PPARD,SPHK1,TNFRSF12A,CSF1,NDEL1,SFN,GOLGA4,SUPV3L1,MTOR,SMURF1,INO80,PROX1,PIM1,EDN1,CDKL5,TAF9,PLAA,NEDD4L,CREB1,CHD7,CDKN2AIP,RPS6KA1
GO:0002683	negative regulation of immune system process	60	425	0.19	0.0228	9606.ENSP00000166139,9606.ENSP00000216117,9606.ENSP00000216797,9606.ENSP00000239882,9606.ENSP00000245414,9606.ENSP00000246672,9606.ENSP00000248244,9606.ENSP00000252229,9606.ENSP00000254066,9606.ENSP00000257604,9606.ENSP00000260356,9606.ENSP00000262510,9606.ENSP00000263202,9606.ENSP00000264198,9606.ENSP00000265643,9606.ENSP00000281708,9606.ENSP00000282412,9606.ENSP00000284273,9606.ENSP00000293328,…	FSTL3,HMOX1,NFKBIA,ELF1,IRF1,NR1D1,TICAM1,MICB,RARA,TRAFD1,THBS1,NLRC5,UFD1L,MUL1,GAL,FBXW7,PPM1B,UBASH3B,STAT5B,F2RL1,RUNX1,CRK,FADD,CEBPB,TRIB1,PIBF1,TOB2,NPLOC4,RIOK3,NRARP,BTN2A2,TRIM38,PELI1,GPATCH3,CTR9,DUSP10,PRDM1,RBM15,BCL10,TSC22D3,DLG5,SDC4,ZC3H12A,HLA-E,SERPINB9,GPS2,CD274,GPNMB,SEC14L1,IL4R,NFE2L2,VIMP,BCL6,TLR6,CYLD,MICA,LDLR,ZFP36,ITCH,TNFAIP3
GO:0043413	macromolecule glycosylation	38	236	0.25	0.0228	9606.ENSP00000239891,9606.ENSP00000248958,9606.ENSP00000258654,9606.ENSP00000267622,9606.ENSP00000268261,9606.ENSP00000269228,9606.ENSP00000296255,9606.ENSP00000301012,9606.ENSP00000305595,9606.ENSP00000307423,9606.ENSP00000310696,9606.ENSP00000312021,9606.ENSP00000316173,9606.ENSP00000317027,9606.ENSP00000326570,9606.ENSP00000339613,9606.ENSP00000351602,9606.ENSP00000351777,9606.ENSP00000353104,…	ALG5,SDF2L1,COG3,TRIP11,PMM2,NPC1,RPN1,MVD,B3GNT2,MGAT2,B4GALT2,FUT1,B3GNT5,GCNT4,FKRP,POFUT2,FUT4,VCP,DHDDS,NUS1,B4GALT5,ST6GALNAC6,SYVN1,EXT1,GCNT2,STT3A,GCNT3,MGAT5,TET3,C1GALT1,MUC20,MUC4,ALG2,B4GALT4,PGM3,TET2,UBE2J1,B4GALT3
GO:0048514	blood vessel morphogenesis	55	381	0.2	0.0228	9606.ENSP00000212015,9606.ENSP00000216037,9606.ENSP00000216117,9606.ENSP00000223095,9606.ENSP00000244869,9606.ENSP00000249749,9606.ENSP00000254958,9606.ENSP00000260356,9606.ENSP00000261523,9606.ENSP00000262947,9606.ENSP00000263640,9606.ENSP00000264036,9606.ENSP00000265165,9606.ENSP00000265354,9606.ENSP00000265371,9606.ENSP00000272233,9606.ENSP00000282397,9606.ENSP00000284274,9606.ENSP00000293379,…	SIRT1,XBP1,HMOX1,SERPINE1,EREG,DLL4,JAG1,THBS1,RORA,C19orf10,ACVR1,MCAM,LEF1,SRF,NRP1,RHOB,FLT1,OTULIN,ITGA5,ANGPTL4,JUNB,CXCL8,EIF2AK3,HEG1,EGR3,TNFRSF12A,ARID2,CAV1,PDGFA,NRARP,ADIPOR2,EPHA2,PROX1,CTGF,EFNA1,NUS1,ECM1,PRDM1,RBM15,JUN,ZC3H12A,BAK1,SHB,EDN1,ETS1,SETD2,C1GALT1,CHD7,JMJD6,CYR61,GNA13,SHC1,TIPARP,ADM,NR4A1
GO:0071495	cellular response to endogenous stimulus	133	1106	0.12	0.0228	9606.ENSP00000209728,9606.ENSP00000212015,9606.ENSP00000215904,9606.ENSP00000216037,9606.ENSP00000220751,9606.ENSP00000224140,9606.ENSP00000226574,9606.ENSP00000229340,9606.ENSP00000229416,9606.ENSP00000238738,9606.ENSP00000239223,9606.ENSP00000239938,9606.ENSP00000242057,9606.ENSP00000245919,9606.ENSP00000246672,9606.ENSP00000249749,9606.ENSP00000251871,9606.ENSP00000252809,9606.ENSP00000252818,…	CDC6,SIRT1,PDXP,XBP1,RIPK2,SETX,NFKB1,RAB35,GCLC,RHOQ,DUSP1,EGR1,AHR,FOSB,NR1D1,DLL4,MED17,GDF15,JUND,SESN2,RARA,RORA,CCNE1,ACVR1,ZNF106,SLC9A1,CBL,RAPGEF2,ICAM1,LEF1,GAREM,NPC1,AKAP8,SIK1,PAK1,STAT5B,FGF19,HSP90B1,CRK,JUNB,FNTA,CEBPB,SIK2,PRKCE,FOS,SLC25A33,YWHAG,CXCL8,DDIT4,ZCCHC12,NR1D2,PPARD,CFLAR,SSH1,USP9X,EGR3,CALR,HMGCS1,HSPA5,PDE4B,SMAD3,NDEL1,CAV1,NR4A2,PMEPA1,ADIPOR2,P2RX4,ENPP1,ZEB1,M…
GO:1902105	regulation of leukocyte differentiation	41	261	0.24	0.0228	9606.ENSP00000166139,9606.ENSP00000216037,9606.ENSP00000220751,9606.ENSP00000245414,9606.ENSP00000245817,9606.ENSP00000249075,9606.ENSP00000254066,9606.ENSP00000259808,9606.ENSP00000262710,9606.ENSP00000265165,9606.ENSP00000281708,9606.ENSP00000284273,9606.ENSP00000284637,9606.ENSP00000293328,9606.ENSP00000295600,9606.ENSP00000300305,9606.ENSP00000301838,9606.ENSP00000303231,9606.ENSP00000305422,…	FSTL3,XBP1,RIPK2,IRF1,TNFSF9,LIF,RARA,RIPK1,ACIN1,LEF1,FBXW7,UBASH3B,SH3RF1,STAT5B,MITF,RUNX1,FADD,IL12A,CEBPB,FOS,TRIB1,TFE3,EGR3,MALT1,NFKBIZ,CSF1,TOB2,RNF41,NRARP,ZEB1,MTOR,DUSP10,PRDM1,JUN,ZC3H12A,CD83,IL4R,BCL6,CREB1,CYLD,TRAF6
GO:1903034	regulation of response to wounding	27	148	0.3	0.023	9606.ENSP00000216037,9606.ENSP00000223095,9606.ENSP00000230990,9606.ENSP00000260356,9606.ENSP00000284273,9606.ENSP00000296677,9606.ENSP00000300574,9606.ENSP00000306124,9606.ENSP00000310928,9606.ENSP00000326737,9606.ENSP00000330382,9606.ENSP00000332973,9606.ENSP00000333982,9606.ENSP00000339191,9606.ENSP00000339328,9606.ENSP00000346508,9606.ENSP00000354558,9606.ENSP00000355396,9606.ENSP00000355866,…	XBP1,SERPINE1,HBEGF,THBS1,UBASH3B,F2RL1,CRK,PRKCE,PPARD,TNFRSF12A,PDGFB,SMAD3,NDEL1,CAV1,PLAUR,PDGFA,MTOR,LRIG2,DUSP10,PPAP2B,PLAU,KLF4,EDN1,TEC,NFE2L2,PHLDB2,TNFAIP3
GO:2000045	regulation of G1/S transition of mitotic cell cycle	27	148	0.3	0.023	9606.ENSP00000209728,9606.ENSP00000261254,9606.ENSP00000263620,9606.ENSP00000274289,9606.ENSP00000276925,9606.ENSP00000290551,9606.ENSP00000296257,9606.ENSP00000301488,9606.ENSP00000308546,9606.ENSP00000309968,9606.ENSP00000319341,9606.ENSP00000319482,9606.ENSP00000340989,9606.ENSP00000351416,9606.ENSP00000353734,9606.ENSP00000355205,9606.ENSP00000360025,9606.ENSP00000361275,9606.ENSP00000362608,…	CDC6,CCND2,ARID3A,PLK2,CDKN2B,BTG2,SENP2,CDK2AP2,MEPCE,ADAM17,LSM10,DCUN1D3,SFN,ANKRD17,PLAGL1,INO80,GADD45A,PLK3,PIM1,KLF4,RGCC,GPNMB,UBE2E2,RDX,CDKN1A,GIGYF2,CNOT4
GO:0035924	cellular response to vascular endothelial growth factor stimulus	11	36	0.53	0.0235	9606.ENSP00000216037,9606.ENSP00000249749,9606.ENSP00000265371,9606.ENSP00000282397,9606.ENSP00000318057,9606.ENSP00000345083,9606.ENSP00000356070,9606.ENSP00000357480,9606.ENSP00000366306,9606.ENSP00000384273,9606.ENSP00000440864	XBP1,DLL4,NRP1,FLT1,EGR3,MAP2K3,MAPKAPK2,NUS1,SPRY2,RELA,NR4A1
GO:0090114	COPII-coated vesicle budding	16	68	0.41	0.024	9606.ENSP00000222547,9606.ENSP00000260643,9606.ENSP00000262225,9606.ENSP00000280551,9606.ENSP00000291574,9606.ENSP00000294179,9606.ENSP00000295400,9606.ENSP00000325827,9606.ENSP00000338844,9606.ENSP00000346139,9606.ENSP00000358071,9606.ENSP00000378721,9606.ENSP00000381823,9606.ENSP00000386651,9606.ENSP00000390783,9606.ENSP00000444850	BET1,PREB,TMED2,SEC24D,TRAPPC10,STX5,TGFA,SEC16A,SEC23B,TBC1D20,SEC23IP,SEC31A,SEC24A,MCFD2,SCFD1,USO1
GO:0009408	response to heat	19	89	0.37	0.0243	9606.ENSP00000216117,9606.ENSP00000229416,9606.ENSP00000252229,9606.ENSP00000256383,9606.ENSP00000260356,9606.ENSP00000263339,9606.ENSP00000266126,9606.ENSP00000301365,9606.ENSP00000314030,9606.ENSP00000335153,9606.ENSP00000356549,9606.ENSP00000358081,9606.ENSP00000359478,9606.ENSP00000359799,9606.ENSP00000364801,9606.ENSP00000378324,9606.ENSP00000384849,9606.ENSP00000394869,9606.ENSP00000413079	HMOX1,GCLC,MICB,EIF2S1,THBS1,IL1A,EIF2B2,TRPV3,DNAJA2,HSP90AA1,IER5,BAG3,ABCC2,DNAJB4,HSPA1B,DNAJA4,CDKN1A,EIF2B4,MICA
GO:0015031	protein transport	162	1391	0.11	0.0244	9606.ENSP00000083182,9606.ENSP00000158771,9606.ENSP00000164227,9606.ENSP00000216037,9606.ENSP00000216797,9606.ENSP00000217402,9606.ENSP00000220509,9606.ENSP00000222547,9606.ENSP00000223369,9606.ENSP00000225235,9606.ENSP00000229340,9606.ENSP00000238855,9606.ENSP00000242480,9606.ENSP00000251849,9606.ENSP00000254616,9606.ENSP00000254998,9606.ENSP00000258098,9606.ENSP00000258654,9606.ENSP00000260130,…	APPBP2,DERL2,BCL3,XBP1,NFKBIA,CHMP4B,VPS18,BET1,YKT6,TBC1D12,RAB35,AFTPH,EGR2,RAF1,TIMM10B,NXT1,RAB11FIP5,COG3,SDCBP,PREB,FAF2,TRAM1,TMED2,VAMP7,UFD1L,ARFGAP3,SLC7A6OS,ARCN1,GRPEL1,GOLPH3,LSG1,GAL,EXPH5,SNX19,VPS37B,TRIP11,ARRDC4,PMM2,AKAP8,RHOB,RAB5A,YIPF5,SEC24D,PDIA4,U2AFBP,STX5,SENP2,F2RL1,LMTK2,AP5Z1,UBAP1,NOL6,SEC61A2,TSC1,DUSP16,HSP90B1,VPS37C,XPO6,RAB24,TVP23B,DDX19A,YWHAG,DAB2,ARFGAP1,CL…
GO:0033673	negative regulation of kinase activity	42	271	0.23	0.0247	9606.ENSP00000014914,9606.ENSP00000212015,9606.ENSP00000215631,9606.ENSP00000235382,9606.ENSP00000239223,9606.ENSP00000240100,9606.ENSP00000252992,9606.ENSP00000264033,9606.ENSP00000276925,9606.ENSP00000284273,9606.ENSP00000287878,9606.ENSP00000288943,9606.ENSP00000296343,9606.ENSP00000298573,9606.ENSP00000300952,9606.ENSP00000305721,9606.ENSP00000306330,9606.ENSP00000312150,9606.ENSP00000330341,…	GPRC5A,SIRT1,GADD45B,RGS2,DUSP1,DUSP4,CEP85,CBL,CDKN2B,UBASH3B,PRKAG2,DUSP2,KIAA0226,DUSP16,MIDN,IBTK,YWHAG,TRIB1,SOCS3,CAV1,SFN,ADARB1,DUSP10,DUSP5,GADD45A,PTPN1,IRS2,SPRY2,ERRFI1,FLRT3,GPS2,LATS2,SH3BP5,AKT1S1,DUSP8,CDKN1A,PPP2CA,PRKRIP1,DNAJC3,PKIB,TNFAIP3,SOCS7
GO:1901214	regulation of neuron death	44	288	0.23	0.0248	9606.ENSP00000179259,9606.ENSP00000212015,9606.ENSP00000216117,9606.ENSP00000216489,9606.ENSP00000217402,9606.ENSP00000229416,9606.ENSP00000239938,9606.ENSP00000250457,9606.ENSP00000256383,9606.ENSP00000264033,9606.ENSP00000265371,9606.ENSP00000281708,9606.ENSP00000290551,9606.ENSP00000295025,9606.ENSP00000298552,9606.ENSP00000305422,9606.ENSP00000306245,9606.ENSP00000307305,9606.ENSP00000309338,…	C12orf5,SIRT1,HMOX1,ALKBH1,CHMP4B,GCLC,EGR1,EGLN3,EIF2S1,CBL,NRP1,FBXW7,BTG2,REL,TSC1,CEBPB,FOS,DDIT4,CLCF1,CLU,SSH1,TP53BP2,NR4A2,MTOR,MCL1,GCLM,JUN,DKK1,ITSN1,GPNMB,AKT1S1,NCOA7,STAMBP,HIPK2,FOXO3,CREB1,TLR6,ZNF746,MAP2K4,BTBD10,DDIT3,NR4A3,ELK1,IKBKG
GO:0032868	response to insulin	35	213	0.26	0.0249	9606.ENSP00000212015,9606.ENSP00000216037,9606.ENSP00000229416,9606.ENSP00000238738,9606.ENSP00000239938,9606.ENSP00000242480,9606.ENSP00000245787,9606.ENSP00000253063,9606.ENSP00000263805,9606.ENSP00000263980,9606.ENSP00000264832,9606.ENSP00000265643,9606.ENSP00000278568,9606.ENSP00000298552,9606.ENSP00000306328,9606.ENSP00000306330,9606.ENSP00000312455,9606.ENSP00000333982,9606.ENSP00000354238,…	SIRT1,XBP1,GCLC,RHOQ,EGR1,EGR2,INSIG2,SESN2,ZNF106,SLC9A1,ICAM1,GAL,PAK1,TSC1,SLC25A33,YWHAG,CFLAR,NDEL1,ENPP1,MTOR,SORBS1,PTPN1,IRS2,ERRFI1,VIMP,GRB10,MYO5A,RELA,BCAR1,LPIN1,SHC1,ATP6V0B,ADM,CPEB2,SOCS7
GO:0006486	protein glycosylation	38	238	0.25	0.0253	9606.ENSP00000239891,9606.ENSP00000248958,9606.ENSP00000258654,9606.ENSP00000267622,9606.ENSP00000268261,9606.ENSP00000269228,9606.ENSP00000296255,9606.ENSP00000301012,9606.ENSP00000305595,9606.ENSP00000307423,9606.ENSP00000310696,9606.ENSP00000312021,9606.ENSP00000316173,9606.ENSP00000317027,9606.ENSP00000326570,9606.ENSP00000339613,9606.ENSP00000351602,9606.ENSP00000351777,9606.ENSP00000353104,…	ALG5,SDF2L1,COG3,TRIP11,PMM2,NPC1,RPN1,MVD,B3GNT2,MGAT2,B4GALT2,FUT1,B3GNT5,GCNT4,FKRP,POFUT2,FUT4,VCP,DHDDS,NUS1,B4GALT5,ST6GALNAC6,SYVN1,EXT1,GCNT2,STT3A,GCNT3,MGAT5,TET3,C1GALT1,MUC20,MUC4,ALG2,B4GALT4,PGM3,TET2,UBE2J1,B4GALT3
GO:0071383	cellular response to steroid hormone stimulus	33	197	0.27	0.0253	9606.ENSP00000246672,9606.ENSP00000251871,9606.ENSP00000254066,9606.ENSP00000261523,9606.ENSP00000262643,9606.ENSP00000264832,9606.ENSP00000265165,9606.ENSP00000269228,9606.ENSP00000307305,9606.ENSP00000310006,9606.ENSP00000310928,9606.ENSP00000312455,9606.ENSP00000320866,9606.ENSP00000344479,9606.ENSP00000345826,9606.ENSP00000359478,9606.ENSP00000361066,9606.ENSP00000366330,9606.ENSP00000366702,…	NR1D1,MED17,RARA,RORA,CCNE1,ICAM1,LEF1,NPC1,DDIT4,NR1D2,PPARD,CFLAR,CALR,NR4A2,PMEPA1,ABCC2,NCOA3,KLF9,ERRFI1,EDN1,NKX3-1,USP8,MED13,FOXO3,KDM3A,FHL2,ATP2B1,NR6A1,RNF4,UBR5,NR4A1,ZFP36,NR4A3
GO:0009100	glycoprotein metabolic process	51	349	0.21	0.0257	9606.ENSP00000035307,9606.ENSP00000158771,9606.ENSP00000237455,9606.ENSP00000239891,9606.ENSP00000248958,9606.ENSP00000256497,9606.ENSP00000258654,9606.ENSP00000265070,9606.ENSP00000266671,9606.ENSP00000267622,9606.ENSP00000268261,9606.ENSP00000269228,9606.ENSP00000276055,9606.ENSP00000296255,9606.ENSP00000301012,9606.ENSP00000304051,9606.ENSP00000305595,9606.ENSP00000307423,9606.ENSP00000310696,…	CHPF2,DERL2,RNF103,ALG5,SDF2L1,EDEM1,COG3,GOLPH3,PHLDA1,TRIP11,PMM2,NPC1,CHST7,RPN1,MVD,RNF139,B3GNT2,MGAT2,B4GALT2,PPARD,FUT1,B3GNT5,GCNT4,FKRP,POFUT2,IDS,FUT4,VCP,DHDDS,NUS1,B4GALT5,ST6GALNAC6,CSGALNACT2,SYVN1,EXT1,BMP2,GCNT2,STT3A,GCNT3,MGAT5,TET3,C1GALT1,CSGALNACT1,MUC20,MUC4,ALG2,B4GALT4,PGM3,TET2,UBE2J1,B4GALT3
GO:0009101	glycoprotein biosynthetic process	44	289	0.22	0.026	9606.ENSP00000035307,9606.ENSP00000239891,9606.ENSP00000248958,9606.ENSP00000258654,9606.ENSP00000265070,9606.ENSP00000266671,9606.ENSP00000267622,9606.ENSP00000268261,9606.ENSP00000269228,9606.ENSP00000276055,9606.ENSP00000296255,9606.ENSP00000301012,9606.ENSP00000305595,9606.ENSP00000307423,9606.ENSP00000310696,9606.ENSP00000312021,9606.ENSP00000316173,9606.ENSP00000317027,9606.ENSP00000326570,…	CHPF2,ALG5,SDF2L1,COG3,GOLPH3,PHLDA1,TRIP11,PMM2,NPC1,CHST7,RPN1,MVD,B3GNT2,MGAT2,B4GALT2,FUT1,B3GNT5,GCNT4,FKRP,POFUT2,FUT4,VCP,DHDDS,NUS1,B4GALT5,ST6GALNAC6,CSGALNACT2,SYVN1,EXT1,GCNT2,STT3A,GCNT3,MGAT5,TET3,C1GALT1,CSGALNACT1,MUC20,MUC4,ALG2,B4GALT4,PGM3,TET2,UBE2J1,B4GALT3
GO:0032648	regulation of interferon-beta production	13	49	0.47	0.026	9606.ENSP00000220751,9606.ENSP00000221452,9606.ENSP00000245414,9606.ENSP00000248244,9606.ENSP00000282412,9606.ENSP00000295025,9606.ENSP00000334564,9606.ENSP00000341874,9606.ENSP00000349596,9606.ENSP00000361446,9606.ENSP00000369213,9606.ENSP00000380904,9606.ENSP00000454207	RIPK2,RELB,IRF1,TICAM1,PPM1B,REL,POLR3C,RIOK3,TRIM38,POLR3A,DDX58,POLR3D,TRAF3
GO:0016242	negative regulation of macroautophagy	10	31	0.55	0.0268	9606.ENSP00000179259,9606.ENSP00000216117,9606.ENSP00000217402,9606.ENSP00000269228,9606.ENSP00000296343,9606.ENSP00000298552,9606.ENSP00000342755,9606.ENSP00000354558,9606.ENSP00000390783,9606.ENSP00000441214	C12orf5,HMOX1,CHMP4B,NPC1,KIAA0226,TSC1,RNF41,MTOR,SCFD1,USP36
GO:0019218	regulation of steroid metabolic process	22	112	0.34	0.0268	9606.ENSP00000212015,9606.ENSP00000226574,9606.ENSP00000228606,9606.ENSP00000239938,9606.ENSP00000244050,9606.ENSP00000245787,9606.ENSP00000246672,9606.ENSP00000261523,9606.ENSP00000265643,9606.ENSP00000265896,9606.ENSP00000293328,9606.ENSP00000294312,9606.ENSP00000301012,9606.ENSP00000313377,9606.ENSP00000322706,9606.ENSP00000344741,9606.ENSP00000345702,9606.ENSP00000355925,9606.ENSP00000368104,…	SIRT1,NFKB1,CYP27B1,EGR1,SNAI1,INSIG2,NR1D1,RORA,GAL,SQLE,STAT5B,FGF19,MVD,PANK2,HMGCS1,INSIG1,NFYA,PROX1,BMP2,MVK,LDLR,SEC14L2
GO:0015833	peptide transport	164	1416	0.11	0.0273	9606.ENSP00000083182,9606.ENSP00000158771,9606.ENSP00000164227,9606.ENSP00000216037,9606.ENSP00000216797,9606.ENSP00000217402,9606.ENSP00000220509,9606.ENSP00000222547,9606.ENSP00000223369,9606.ENSP00000225235,9606.ENSP00000229340,9606.ENSP00000238855,9606.ENSP00000242480,9606.ENSP00000251849,9606.ENSP00000254616,9606.ENSP00000254998,9606.ENSP00000258098,9606.ENSP00000258654,9606.ENSP00000260130,…	APPBP2,DERL2,BCL3,XBP1,NFKBIA,CHMP4B,VPS18,BET1,YKT6,TBC1D12,RAB35,AFTPH,EGR2,RAF1,TIMM10B,NXT1,RAB11FIP5,COG3,SDCBP,PREB,FAF2,TRAM1,TMED2,VAMP7,UFD1L,ARFGAP3,SLC7A6OS,ARCN1,GRPEL1,GOLPH3,LSG1,GAL,EXPH5,SNX19,VPS37B,TRIP11,ARRDC4,PMM2,AKAP8,RHOB,RAB5A,YIPF5,SEC24D,PDIA4,U2AFBP,STX5,SENP2,F2RL1,LMTK2,AP5Z1,UBAP1,NOL6,SEC61A2,TSC1,DUSP16,HSP90B1,VPS37C,XPO6,RAB24,TVP23B,DDX19A,YWHAG,DAB2,ARFGAP1,CL…
GO:0001959	regulation of cytokine-mediated signaling pathway	27	151	0.29	0.0285	9606.ENSP00000220751,9606.ENSP00000239882,9606.ENSP00000256458,9606.ENSP00000259808,9606.ENSP00000262510,9606.ENSP00000263464,9606.ENSP00000264198,9606.ENSP00000284274,9606.ENSP00000290219,9606.ENSP00000296677,9606.ENSP00000300305,9606.ENSP00000301838,9606.ENSP00000309968,9606.ENSP00000313681,9606.ENSP00000327513,9606.ENSP00000330341,9606.ENSP00000339191,9606.ENSP00000358045,9606.ENSP00000359424,…	RIPK2,ELF1,IRAK2,RIPK1,NLRC5,BIRC3,MUL1,OTULIN,IFNGR2,F2RL1,RUNX1,FADD,ADAM17,SPHK1,CSF1,SOCS3,CAV1,ECM1,CHUK,PTPN1,HSPA1B,EDN1,GPS2,CYLD,BIRC2,TNFAIP3,IKBKG
GO:0008104	protein localization	219	1966	0.09	0.0288	9606.ENSP00000083182,9606.ENSP00000158771,9606.ENSP00000164227,9606.ENSP00000171111,9606.ENSP00000200453,9606.ENSP00000216037,9606.ENSP00000216797,9606.ENSP00000217402,9606.ENSP00000220509,9606.ENSP00000221566,9606.ENSP00000222547,9606.ENSP00000223369,9606.ENSP00000225235,9606.ENSP00000225737,9606.ENSP00000229340,9606.ENSP00000230321,9606.ENSP00000238855,9606.ENSP00000242480,9606.ENSP00000246914,…	APPBP2,DERL2,BCL3,KEAP1,PPP1R15A,XBP1,NFKBIA,CHMP4B,VPS18,SGTA,BET1,YKT6,TBC1D12,AKAP10,RAB35,MDFI,AFTPH,EGR2,WNK4,RAF1,TIMM10B,NXT1,RAB11FIP5,COG3,SDCBP,PREB,FAF2,PIK3C3,WIPI1,TRAM1,TMED2,VAMP7,UFD1L,ARFGAP3,SLC7A6OS,ARCN1,ALS2,PIKFYVE,RAPGEF2,GRPEL1,GOLPH3,LSG1,NRP1,GAL,EXPH5,GET4,SNX19,VPS37B,TRIP11,ARRDC4,PMM2,NPC1,AKAP8,RHOB,RAB5A,YIPF5,NFKBIE,SEC24D,NIPBL,PDIA4,BRAF,U2AFBP,STX5,SENP2,F2RL1,…
GO:0009895	negative regulation of catabolic process	42	274	0.23	0.0288	9606.ENSP00000158771,9606.ENSP00000179259,9606.ENSP00000185150,9606.ENSP00000216117,9606.ENSP00000217402,9606.ENSP00000221086,9606.ENSP00000221566,9606.ENSP00000260130,9606.ENSP00000262384,9606.ENSP00000268184,9606.ENSP00000269228,9606.ENSP00000280614,9606.ENSP00000296343,9606.ENSP00000298552,9606.ENSP00000305790,9606.ENSP00000307305,9606.ENSP00000316512,9606.ENSP00000326813,9606.ENSP00000331907,…	DERL2,C12orf5,ERLEC1,HMOX1,CHMP4B,MTMR9,SGTA,SDCBP,N4BP1,CRTC3,NPC1,CCRN4L,KIAA0226,TSC1,SF3B3,DDIT4,TLK2,YOD1,DHX34,SMAD3,RNF41,WAC,MTOR,LRIG2,MAPKAPK2,EFNA1,MCL1,FAM46C,TRIM39,TAF9,USP25,RELA,HIPK2,HERC1,SCFD1,RIC1,RYBP,SH3RF2,TOB1,USP36,UBE2J1,ZFP36
GO:0051649	establishment of localization in cell	184	1616	0.1	0.0288	9606.ENSP00000009041,9606.ENSP00000083182,9606.ENSP00000158771,9606.ENSP00000164227,9606.ENSP00000216797,9606.ENSP00000217402,9606.ENSP00000220325,9606.ENSP00000220509,9606.ENSP00000222547,9606.ENSP00000223369,9606.ENSP00000225235,9606.ENSP00000229340,9606.ENSP00000237642,9606.ENSP00000242480,9606.ENSP00000251849,9606.ENSP00000254616,9606.ENSP00000254998,9606.ENSP00000257749,9606.ENSP00000258098,…	STARD3NL,APPBP2,DERL2,BCL3,NFKBIA,CHMP4B,EHD4,VPS18,BET1,YKT6,TBC1D12,RAB35,STBD1,EGR2,RAF1,TIMM10B,NXT1,BACH2,RAB11FIP5,COG3,SDCBP,PREB,FAF2,PIK3C3,WIPI1,TRAM1,TMED2,VAMP7,UFD1L,ARFGAP3,ARCN1,CBL,ALS2,PIKFYVE,GRPEL1,LSG1,EXPH5,VPS37B,TRIP11,PMM2,TINAGL1,RHOB,RAB5A,DYNC1LI1,SEC24D,WHAMM,U2AFBP,TRAPPC10,STX5,TGFA,LMTK2,AP5Z1,GEM,UBAP1,NOL6,TSC1,DUSP16,HSP90B1,DCTN5,TUBA1A,VPS37C,XPO6,IBTK,PRKCE,YW…
GO:2001242	regulation of intrinsic apoptotic signaling pathway	28	159	0.29	0.0288	9606.ENSP00000198767,9606.ENSP00000212015,9606.ENSP00000216037,9606.ENSP00000225174,9606.ENSP00000244050,9606.ENSP00000246229,9606.ENSP00000260442,9606.ENSP00000281708,9606.ENSP00000307235,9606.ENSP00000315130,9606.ENSP00000318687,9606.ENSP00000326119,9606.ENSP00000327801,9606.ENSP00000339191,9606.ENSP00000339328,9606.ENSP00000342136,9606.ENSP00000358022,9606.ENSP00000360683,9606.ENSP00000366395,…	RRN3,SIRT1,XBP1,PPIF,SNAI1,PLAGL2,BCL2L10,FBXW7,EIF2AK3,CLU,HSPH1,PMAIP1,P4HB,CAV1,PLAUR,CREB3,MCL1,PTPN1,SYVN1,TAF9,NKX3-1,NFE2L2,VIMP,CYLD,HERPUD1,SKIL,DDIT3,BDKRB2
GO:0048208	COPII vesicle coating	15	63	0.42	0.0289	9606.ENSP00000222547,9606.ENSP00000260643,9606.ENSP00000262225,9606.ENSP00000280551,9606.ENSP00000291574,9606.ENSP00000294179,9606.ENSP00000295400,9606.ENSP00000325827,9606.ENSP00000346139,9606.ENSP00000358071,9606.ENSP00000378721,9606.ENSP00000381823,9606.ENSP00000386651,9606.ENSP00000390783,9606.ENSP00000444850	BET1,PREB,TMED2,SEC24D,TRAPPC10,STX5,TGFA,SEC16A,TBC1D20,SEC23IP,SEC31A,SEC24A,MCFD2,SCFD1,USO1
GO:1903426	regulation of reactive oxygen species biosynthetic process	17	77	0.39	0.0297	9606.ENSP00000218516,9606.ENSP00000248244,9606.ENSP00000264832,9606.ENSP00000306328,9606.ENSP00000312455,9606.ENSP00000315130,9606.ENSP00000332973,9606.ENSP00000335153,9606.ENSP00000339191,9606.ENSP00000353032,9606.ENSP00000354558,9606.ENSP00000355133,9606.ENSP00000362179,9606.ENSP00000363804,9606.ENSP00000368683,9606.ENSP00000385824,9606.ENSP00000389600	GLA,TICAM1,ICAM1,SLC25A33,CFLAR,CLU,SMAD3,HSP90AA1,CAV1,P2RX4,MTOR,NOS1AP,ZC3H12A,KLF4,EDN1,FOXO3,TLR6
GO:0002756	MyD88-independent toll-like receptor signaling pathway	9	26	0.58	0.0298	9606.ENSP00000248244,9606.ENSP00000259808,9606.ENSP00000301838,9606.ENSP00000306124,9606.ENSP00000359424,9606.ENSP00000389600,9606.ENSP00000441543,9606.ENSP00000454207,9606.ENSP00000483825	TICAM1,RIPK1,FADD,PRKCE,CHUK,TLR6,UBC,TRAF3,IKBKG
GO:0030511	positive regulation of transforming growth factor beta receptor signaling pathway	9	26	0.58	0.0298	9606.ENSP00000260130,9606.ENSP00000260356,9606.ENSP00000276925,9606.ENSP00000285071,9606.ENSP00000309968,9606.ENSP00000313391,9606.ENSP00000385571,9606.ENSP00000444198,9606.ENSP00000453872	SDCBP,THBS1,CDKN2B,FLCN,ADAM17,DAB2,HIPK2,CITED2,RNF111
GO:0034248	regulation of cellular amide metabolic process	54	379	0.2	0.0299	9606.ENSP00000164227,9606.ENSP00000179259,9606.ENSP00000200453,9606.ENSP00000216489,9606.ENSP00000220592,9606.ENSP00000235382,9606.ENSP00000243045,9606.ENSP00000250113,9606.ENSP00000250896,9606.ENSP00000253063,9606.ENSP00000254066,9606.ENSP00000256383,9606.ENSP00000260356,9606.ENSP00000266126,9606.ENSP00000277540,9606.ENSP00000290551,9606.ENSP00000298552,9606.ENSP00000304051,9606.ENSP00000307235,…	BCL3,C12orf5,PPP1R15A,ALKBH1,AGO2,RGS2,ORMDL2,FXR2,MKNK2,SESN2,RARA,EIF2S1,THBS1,EIF2B2,DPH7,BTG2,TSC1,RNF139,EIF2AK3,RPS6KB2,TRMT10C,PER1,CLU,SAMD4B,CALR,KLHL25,PIWIL2,ETF1,MTOR,PPP1R15B,EFNA1,PLK3,ZC3H12A,AGO3,HABP4,IGF2BP2,SAMD4A,PAIP2,PDP1,NFE2L2,FOXO3,GIGYF2,NANOS1,EIF2B4,CYR61,ZNF598,TOB1,RPS6KA1,CELF1,DAPK3,CPEB2,ZFP36,MPV17L2,DNAJC3
GO:0060546	negative regulation of necroptotic process	6	11	0.78	0.0299	9606.ENSP00000263464,9606.ENSP00000281456,9606.ENSP00000301838,9606.ENSP00000312455,9606.ENSP00000339191,9606.ENSP00000477613	BIRC3,SLC25A4,FADD,CFLAR,CAV1,BIRC2
GO:0051130	positive regulation of cellular component organization	134	1128	0.12	0.0307	9606.ENSP00000056217,9606.ENSP00000164133,9606.ENSP00000198767,9606.ENSP00000200453,9606.ENSP00000202556,9606.ENSP00000212015,9606.ENSP00000215904,9606.ENSP00000216037,9606.ENSP00000223095,9606.ENSP00000224140,9606.ENSP00000225174,9606.ENSP00000235382,9606.ENSP00000238738,9606.ENSP00000240874,9606.ENSP00000244869,9606.ENSP00000245907,9606.ENSP00000249075,9606.ENSP00000252809,9606.ENSP00000256001,…	ARHGEF5,PPP2R5B,RRN3,PPP1R15A,PPP1R13B,SIRT1,PDXP,XBP1,SERPINE1,SETX,PPIF,RGS2,RHOQ,KALRN,EREG,C3,LIF,GDF15,ACTR3B,SDCBP,MAPK6,SEMA7A,VAMP7,IL1A,CBL,MUL1,SLAIN2,RAPGEF2,ICAM1,SRF,NRP1,GTF2H1,CLSTN3,JDP2,AKAP8,PAK1,FBXW7,NIPBL,WHAMM,NSMCE2,CDC42EP3,TGFA,MITF,ICE1,F2RL1,TSC1,CRK,LRP8,PRKCE,YWHAG,TADA2B,FOSL1,CFLAR,DAB2,CLU,SWAP70,SSH1,DVL3,PLD6,CALR,MMP1,AMIGO3,HSPA5,PMAIP1,TNFRSF12A,MIEF1,ATAT1,PD…
GO:0051056	regulation of small GTPase mediated signal transduction	46	310	0.21	0.0311	9606.ENSP00000033079,9606.ENSP00000056217,9606.ENSP00000216373,9606.ENSP00000220507,9606.ENSP00000238738,9606.ENSP00000240874,9606.ENSP00000251691,9606.ENSP00000251849,9606.ENSP00000260526,9606.ENSP00000264276,9606.ENSP00000265371,9606.ENSP00000265960,9606.ENSP00000267205,9606.ENSP00000272233,9606.ENSP00000276297,9606.ENSP00000285071,9606.ENSP00000289968,9606.ENSP00000296677,9606.ENSP00000297044,…	FAM13B,ARHGEF5,SOS2,RHOV,RHOQ,KALRN,KIAA1244,RAF1,ARHGAP29,ALS2,NRP1,MAPKAP1,RHOF,RHOB,DLC1,FLCN,ARHGAP17,F2RL1,CYTH3,ARHGAP42,CRK,ARAP2,CSF1,ARHGAP10,STARD13,TRIO,ARHGAP12,NET1,CYTH1,AKAP13,SIPA1L2,RASAL2,SHOC2,GBF1,RAPGEF1,SPRY2,ARHGAP44,ITSN1,SQSTM1,STAMBP,RDX,BCL6,SPATA13,GNA13,MURC,ARHGAP23
GO:1902235	regulation of endoplasmic reticulum stress-induced intrinsic apoptotic signaling pathway	10	32	0.54	0.0313	9606.ENSP00000212015,9606.ENSP00000216037,9606.ENSP00000307235,9606.ENSP00000326119,9606.ENSP00000342136,9606.ENSP00000360683,9606.ENSP00000366395,9606.ENSP00000381282,9606.ENSP00000409555,9606.ENSP00000448665	SIRT1,XBP1,EIF2AK3,PMAIP1,CREB3,PTPN1,SYVN1,VIMP,HERPUD1,DDIT3
GO:0007623	circadian rhythm	25	137	0.3	0.0314	9606.ENSP00000212015,9606.ENSP00000221452,9606.ENSP00000222553,9606.ENSP00000223095,9606.ENSP00000224140,9606.ENSP00000242057,9606.ENSP00000246672,9606.ENSP00000252818,9606.ENSP00000256495,9606.ENSP00000260187,9606.ENSP00000261523,9606.ENSP00000280614,9606.ENSP00000297689,9606.ENSP00000314420,9606.ENSP00000318057,9606.ENSP00000319169,9606.ENSP00000355925,9606.ENSP00000360266,9606.ENSP00000366330,…	SIRT1,RELB,NAMPT,SERPINE1,SETX,AHR,NR1D1,JUND,BHLHE40,USP2,RORA,CCRN4L,NFIL3,PER1,EGR3,PRMT5,PROX1,JUN,KLF9,CSNK1E,KDM5A,ARNTL,CREB1,CLDN4,CRY2
GO:1904031	positive regulation of cyclin-dependent protein kinase activity	11	38	0.5	0.0314	9606.ENSP00000209728,9606.ENSP00000261254,9606.ENSP00000264157,9606.ENSP00000295926,9606.ENSP00000309968,9606.ENSP00000330382,9606.ENSP00000335628,9606.ENSP00000355925,9606.ENSP00000362608,9606.ENSP00000368664,9606.ENSP00000384849	CDC6,CCND2,CCNT2,CCNL1,ADAM17,PDGFB,SPDYA,PROX1,PIM1,RGCC,CDKN1A
GO:0001890	placenta development	26	145	0.3	0.0319	9606.ENSP00000216038,9606.ENSP00000216489,9606.ENSP00000228606,9606.ENSP00000230321,9606.ENSP00000244050,9606.ENSP00000249075,9606.ENSP00000257527,9606.ENSP00000262225,9606.ENSP00000265165,9606.ENSP00000296257,9606.ENSP00000303315,9606.ENSP00000305422,9606.ENSP00000310170,9606.ENSP00000310928,9606.ENSP00000330341,9606.ENSP00000330382,9606.ENSP00000358092,9606.ENSP00000358799,9606.ENSP00000359297,…	RTCB,ALKBH1,CYP27B1,MDFI,SNAI1,LIF,ADAM19,TMED2,LEF1,SENP2,JUNB,CEBPB,FOSL1,PPARD,SOCS3,PDGFB,PRDM1,RBM15,NSDHL,GJB3,ASH1L,SETD2,BIRC6,CYR61,ADM,BIRC2
GO:0039531	regulation of viral-induced cytoplasmic pattern recognition receptor signaling pathway	8	21	0.62	0.0319	9606.ENSP00000263202,9606.ENSP00000263464,9606.ENSP00000331487,9606.ENSP00000341874,9606.ENSP00000351416,9606.ENSP00000354645,9606.ENSP00000376268,9606.ENSP00000477613	UFD1L,BIRC3,NPLOC4,RIOK3,ANKRD17,GPATCH3,SEC14L1,BIRC2
GO:1901216	positive regulation of neuron death	18	85	0.37	0.0321	9606.ENSP00000239938,9606.ENSP00000256383,9606.ENSP00000281708,9606.ENSP00000306245,9606.ENSP00000307305,9606.ENSP00000315130,9606.ENSP00000315713,9606.ENSP00000341957,9606.ENSP00000354558,9606.ENSP00000358022,9606.ENSP00000360266,9606.ENSP00000363081,9606.ENSP00000385824,9606.ENSP00000389600,9606.ENSP00000395007,9606.ENSP00000410402,9606.ENSP00000448665,9606.ENSP00000483056	EGR1,EIF2S1,FBXW7,FOS,DDIT4,CLU,SSH1,TP53BP2,MTOR,MCL1,JUN,DKK1,FOXO3,TLR6,ZNF746,MAP2K4,DDIT3,ELK1
GO:0060341	regulation of cellular localization	96	766	0.14	0.0322	9606.ENSP00000158771,9606.ENSP00000185150,9606.ENSP00000202556,9606.ENSP00000212015,9606.ENSP00000216037,9606.ENSP00000216117,9606.ENSP00000216629,9606.ENSP00000238738,9606.ENSP00000240874,9606.ENSP00000246672,9606.ENSP00000249075,9606.ENSP00000253063,9606.ENSP00000256497,9606.ENSP00000258098,9606.ENSP00000260643,9606.ENSP00000262640,9606.ENSP00000262643,9606.ENSP00000264711,9606.ENSP00000273047,…	DERL2,ERLEC1,PPP1R13B,SIRT1,XBP1,HMOX1,BDKRB1,RHOQ,KALRN,NR1D1,LIF,SESN2,EDEM1,RAB11FIP5,PREB,VAMP7,CCNE1,DNAJC27,RAB5A,YIPF5,PAK1,FBXW7,RIOK2,UBASH3B,FLCN,ICE1,NDUFAF2,RNF139,ADORA2B,PRKCE,YWHAG,EIF2AK3,DAB2,SSH1,DVL3,STX4,HSPH1,PINX1,SUPT6H,PMAIP1,YOD1,MIEF1,SMAD3,MX2,NDEL1,HSP90AA1,STX3,CAV1,SFN,TP53BP2,JPH1,INSIG1,TBC1D20,DYNC1H1,EPHA2,NUP214,MTCL1,P2RX4,MAP2,PIM3,LRIG2,NUS1,BAG3,GBF1,SORBS1,…
GO:0008630	intrinsic apoptotic signaling pathway in response to DNA damage	16	71	0.39	0.0324	9606.ENSP00000164227,9606.ENSP00000212015,9606.ENSP00000216117,9606.ENSP00000234420,9606.ENSP00000260442,9606.ENSP00000296444,9606.ENSP00000307305,9606.ENSP00000331944,9606.ENSP00000340989,9606.ENSP00000351209,9606.ENSP00000353735,9606.ENSP00000358022,9606.ENSP00000363591,9606.ENSP00000384849,9606.ENSP00000385571,9606.ENSP00000423550	BCL3,SIRT1,HMOX1,MSH6,BCL2L10,SHISA5,DDIT4,AEN,SFN,EPHA2,TOPORS,MCL1,BAK1,CDKN1A,HIPK2,CSB-PGBD3
GO:0035728	response to hepatocyte growth factor	7	16	0.68	0.0324	9606.ENSP00000229416,9606.ENSP00000265371,9606.ENSP00000300574,9606.ENSP00000359258,9606.ENSP00000384273,9606.ENSP00000387699,9606.ENSP00000391669	GCLC,NRP1,CRK,GCLM,RELA,CREB1,BCAR1
GO:0071243	cellular response to arsenic-containing substance	7	16	0.68	0.0324	9606.ENSP00000216117,9606.ENSP00000225174,9606.ENSP00000250896,9606.ENSP00000314619,9606.ENSP00000344352,9606.ENSP00000362179,9606.ENSP00000443985	HMOX1,PPIF,MKNK2,ZFAND2A,ATF3,ZC3H12A,CPEB2
GO:1901799	negative regulation of proteasomal protein catabolic process	13	51	0.45	0.033	9606.ENSP00000158771,9606.ENSP00000185150,9606.ENSP00000221566,9606.ENSP00000260130,9606.ENSP00000262384,9606.ENSP00000316512,9606.ENSP00000326813,9606.ENSP00000346986,9606.ENSP00000370201,9606.ENSP00000383044,9606.ENSP00000419494,9606.ENSP00000424497,9606.ENSP00000451261	DERL2,ERLEC1,SGTA,SDCBP,N4BP1,TLK2,YOD1,WAC,TAF9,USP25,RYBP,SH3RF2,UBE2J1
GO:2001238	positive regulation of extrinsic apoptotic signaling pathway	13	51	0.45	0.033	9606.ENSP00000259808,9606.ENSP00000260356,9606.ENSP00000301838,9606.ENSP00000326119,9606.ENSP00000326737,9606.ENSP00000339191,9606.ENSP00000344352,9606.ENSP00000357055,9606.ENSP00000359612,9606.ENSP00000392025,9606.ENSP00000415243,9606.ENSP00000442973,9606.ENSP00000470082	RIPK1,THBS1,FADD,PMAIP1,TNFRSF12A,CAV1,ATF3,PEA15,BCL10,CYLD,SKIL,DAPK3,DEDD2
GO:0001704	formation of primary germ layer	22	115	0.32	0.0335	9606.ENSP00000239223,9606.ENSP00000240100,9606.ENSP00000244050,9606.ENSP00000254846,9606.ENSP00000263640,9606.ENSP00000265165,9606.ENSP00000265354,9606.ENSP00000288943,9606.ENSP00000293379,9606.ENSP00000324532,9606.ENSP00000332973,9606.ENSP00000339613,9606.ENSP00000353344,9606.ENSP00000355013,9606.ENSP00000358596,9606.ENSP00000363081,9606.ENSP00000363804,9606.ENSP00000367203,9606.ENSP00000384164,…	DUSP1,DUSP4,SNAI1,KDM6B,ACVR1,LEF1,SRF,DUSP2,ITGA5,LAMA3,SMAD3,POFUT2,ETS2,CTR9,DUSP5,DKK1,KLF4,KDM6A,KIF16B,SETD2,TXNRD1,NR4A3
GO:0009888	tissue development	184	1626	0.1	0.0347	9606.ENSP00000179259,9606.ENSP00000216037,9606.ENSP00000228606,9606.ENSP00000230990,9606.ENSP00000234198,9606.ENSP00000237937,9606.ENSP00000239223,9606.ENSP00000239938,9606.ENSP00000240100,9606.ENSP00000242480,9606.ENSP00000244050,9606.ENSP00000244869,9606.ENSP00000246914,9606.ENSP00000249075,9606.ENSP00000249749,9606.ENSP00000252542,9606.ENSP00000254066,9606.ENSP00000254846,9606.ENSP00000254958,…	C12orf5,XBP1,CYP27B1,HBEGF,DLX2,ZFAND5,DUSP1,EGR1,DUSP4,EGR2,SNAI1,EREG,WNK4,LIF,DLL4,SAFB2,RARA,KDM6B,JAG1,TBX3,MMP13,TMED2,ACVR1,SLC9A1,CCNT2,ARID4B,RAPGEF2,FOSL2,ICAM1,ARRDC3,LEF1,SRF,NRP1,EXPH5,SNX19,TRIP11,SIK1,MEF2D,RHOB,SLC20A1,PELO,DLC1,PAK1,SLC7A11,TJP1,DUSP2,BTG2,STAT5B,ITGA5,FGF19,KLF15,SENP2,F2RL1,TSC1,RUNX1,JUNB,LUZP1,CEBPB,FOS,EIF2AK3,ADAM17,PPARD,HEG1,CFLAR,DAB2,TOLLIP,DVL3,GCNT4,R…
GO:0042108	positive regulation of cytokine biosynthetic process	14	58	0.42	0.0347	9606.ENSP00000164227,9606.ENSP00000216117,9606.ENSP00000239938,9606.ENSP00000244869,9606.ENSP00000245414,9606.ENSP00000248244,9606.ENSP00000260356,9606.ENSP00000263339,9606.ENSP00000293328,9606.ENSP00000356070,9606.ENSP00000359612,9606.ENSP00000384273,9606.ENSP00000389600,9606.ENSP00000433623	BCL3,HMOX1,EGR1,EREG,IRF1,TICAM1,THBS1,IL1A,STAT5B,MAPKAPK2,BCL10,RELA,TLR6,TRAF6
GO:0043280	positive regulation of cysteine-type endopeptidase activity involved in apoptotic process	23	123	0.31	0.0347	9606.ENSP00000212015,9606.ENSP00000250457,9606.ENSP00000259808,9606.ENSP00000260442,9606.ENSP00000264198,9606.ENSP00000276297,9606.ENSP00000276431,9606.ENSP00000301838,9606.ENSP00000307235,9606.ENSP00000307786,9606.ENSP00000326119,9606.ENSP00000332973,9606.ENSP00000351777,9606.ENSP00000356954,9606.ENSP00000359612,9606.ENSP00000362730,9606.ENSP00000363591,9606.ENSP00000368727,9606.ENSP00000370253,…	SIRT1,EGLN3,RIPK1,BCL2L10,MUL1,DLC1,TNFRSF10B,FADD,EIF2AK3,CYCS,PMAIP1,SMAD3,VCP,CTGF,BCL10,MTCH1,BAK1,XDH,NKX3-1,SLC11A2,DIABLO,CYR61,BCL2L13
GO:0048856	anatomical structure development	518	5085	0.05	0.0347	9606.ENSP00000064780,9606.ENSP00000164024,9606.ENSP00000164133,9606.ENSP00000164227,9606.ENSP00000166139,9606.ENSP00000171111,9606.ENSP00000179259,9606.ENSP00000193322,9606.ENSP00000198767,9606.ENSP00000212015,9606.ENSP00000215631,9606.ENSP00000216037,9606.ENSP00000216038,9606.ENSP00000216117,9606.ENSP00000216489,9606.ENSP00000216797,9606.ENSP00000220592,9606.ENSP00000221452,9606.ENSP00000223095,…	RELT,CELSR3,PPP2R5B,BCL3,FSTL3,KEAP1,C12orf5,OSTM1,RRN3,SIRT1,GADD45B,XBP1,RTCB,HMOX1,ALKBH1,NFKBIA,AGO2,RELB,SERPINE1,SETX,CYP27B1,RAB35,MDFI,BYSL,HBEGF,TUSC2,ODC1,DLX2,MSH6,PRDM2,RGS2,CAMSAP2,RNF103,ZFAND5,DUSP1,ALG5,EGR1,DUSP4,KALRN,AHR,EGR2,SNAI1,EREG,IRF1,INSIG2,PLAGL2,WNK4,LIF,DNAJB9,DLL4,MKNK2,RAF1,SAFB2,GDF15,JUND,NUMBL,RARA,DNAJB1,H3F3B,KDM6B,JAG1,MBD2,CABLES1,ADAM19,TBX3,AKIRIN2,C2orf49…
GO:0051641	cellular localization	239	2180	0.08	0.035	9606.ENSP00000009041,9606.ENSP00000083182,9606.ENSP00000158771,9606.ENSP00000164227,9606.ENSP00000200453,9606.ENSP00000216797,9606.ENSP00000217402,9606.ENSP00000220325,9606.ENSP00000220509,9606.ENSP00000221566,9606.ENSP00000222547,9606.ENSP00000223369,9606.ENSP00000225235,9606.ENSP00000229340,9606.ENSP00000237642,9606.ENSP00000242480,9606.ENSP00000251849,9606.ENSP00000254616,9606.ENSP00000254998,…	STARD3NL,APPBP2,DERL2,BCL3,PPP1R15A,NFKBIA,CHMP4B,EHD4,VPS18,SGTA,BET1,YKT6,TBC1D12,RAB35,STBD1,EGR2,RAF1,TIMM10B,NXT1,ARL8B,BACH2,RAB11FIP5,COG3,SDCBP,HAUS2,PREB,FAF2,PIK3C3,WIPI1,TRAM1,TMED2,VAMP7,UFD1L,ARFGAP3,ARCN1,CBL,MUL1,ALS2,PIKFYVE,RAPGEF2,GRPEL1,GOLPH3,LSG1,NRP1,EXPH5,GET4,VPS37B,TRIP11,PMM2,NPC1,TINAGL1,RHOB,RAB5A,DYNC1LI1,FTH1,SEC24D,NIPBL,WHAMM,BRAF,U2AFBP,TRAPPC10,STX5,TGFA,LMTK2,AP…
GO:0070076	histone lysine demethylation	9	27	0.56	0.035	9606.ENSP00000254846,9606.ENSP00000350676,9606.ENSP00000356234,9606.ENSP00000367203,9606.ENSP00000370710,9606.ENSP00000382204,9606.ENSP00000382688,9606.ENSP00000386660,9606.ENSP00000432786	KDM6B,PHF8,KDM5B,KDM6A,JMJD2C,JMJD1C,KDM5A,KDM3A,KDM2A
GO:0070373	negative regulation of ERK1 and ERK2 cascade	15	65	0.4	0.0354	9606.ENSP00000216037,9606.ENSP00000239223,9606.ENSP00000240100,9606.ENSP00000249075,9606.ENSP00000283228,9606.ENSP00000285071,9606.ENSP00000344352,9606.ENSP00000355866,9606.ENSP00000358140,9606.ENSP00000360683,9606.ENSP00000361263,9606.ENSP00000363804,9606.ENSP00000366306,9606.ENSP00000366702,9606.ENSP00000475915	XBP1,DUSP1,DUSP4,LIF,PTPRR,FLCN,ATF3,DUSP10,EIF3A,PTPN1,RAPGEF1,KLF4,SPRY2,ERRFI1,CNKSR3
GO:1903363	negative regulation of cellular protein catabolic process	17	79	0.37	0.0355	9606.ENSP00000158771,9606.ENSP00000185150,9606.ENSP00000221566,9606.ENSP00000260130,9606.ENSP00000262384,9606.ENSP00000316512,9606.ENSP00000326813,9606.ENSP00000346986,9606.ENSP00000357392,9606.ENSP00000365844,9606.ENSP00000370201,9606.ENSP00000383044,9606.ENSP00000385571,9606.ENSP00000416696,9606.ENSP00000419494,9606.ENSP00000424497,9606.ENSP00000451261	DERL2,ERLEC1,SGTA,SDCBP,N4BP1,TLK2,YOD1,WAC,EFNA1,TRIM39,TAF9,USP25,HIPK2,RIC1,RYBP,SH3RF2,UBE2J1
GO:0045737	positive regulation of cyclin-dependent protein serine/threonine kinase activity	10	33	0.52	0.0362	9606.ENSP00000209728,9606.ENSP00000261254,9606.ENSP00000264157,9606.ENSP00000295926,9606.ENSP00000309968,9606.ENSP00000330382,9606.ENSP00000335628,9606.ENSP00000355925,9606.ENSP00000362608,9606.ENSP00000368664	CDC6,CCND2,CCNT2,CCNL1,ADAM17,PDGFB,SPDYA,PROX1,PIM1,RGCC
GO:1904018	positive regulation of vasculature development	30	179	0.27	0.0364	9606.ENSP00000212015,9606.ENSP00000216037,9606.ENSP00000216117,9606.ENSP00000220592,9606.ENSP00000223095,9606.ENSP00000239938,9606.ENSP00000245907,9606.ENSP00000256015,9606.ENSP00000260356,9606.ENSP00000262947,9606.ENSP00000263339,9606.ENSP00000264431,9606.ENSP00000265371,9606.ENSP00000272233,9606.ENSP00000274289,9606.ENSP00000282397,9606.ENSP00000293379,9606.ENSP00000300305,9606.ENSP00000301455,…	SIRT1,XBP1,HMOX1,AGO2,SERPINE1,EGR1,C3,BTG1,THBS1,C19orf10,IL1A,RAPGEF2,NRP1,RHOB,PLK2,FLT1,ITGA5,RUNX1,ANGPTL4,CXCL8,CFLAR,SPHK1,PDGFB,ECM1,ZC3H12A,KLF4,ETS1,NFE2L2,HIPK2,ADM
GO:0034470	ncRNA processing	49	340	0.2	0.0365	9606.ENSP00000199320,9606.ENSP00000212015,9606.ENSP00000216038,9606.ENSP00000216489,9606.ENSP00000220592,9606.ENSP00000230340,9606.ENSP00000244230,9606.ENSP00000254605,9606.ENSP00000261708,9606.ENSP00000274695,9606.ENSP00000283109,9606.ENSP00000296792,9606.ENSP00000297990,9606.ENSP00000306565,9606.ENSP00000308332,9606.ENSP00000310260,9606.ENSP00000312356,9606.ENSP00000314193,9606.ENSP00000323288,…	DIMT1,SIRT1,RTCB,ALKBH1,AGO2,BYSL,MPHOSPH10,RRP8,UTP6,CDKAL1,RIOK2,UTP15,NOL6,ISG20,UTP23,INTS6,TRMT10C,WDR75,RPUSD2,ISG20L2,KARS,CIRH1A,INTS5,SMAD3,RRP1B,RIOK3,WDR37,WDR55,MDN1,PDCD11,TOE1,YRDC,AGO3,TEX10,ZCCHC6,RIOK1,NOP2,TRMT44,DDX51,WDR43,POP1,CTU1,CHD7,EXOSC6,INTS12,THUMPD2,CLP1,NOL8,RPP38
GO:1902806	regulation of cell cycle G1/S phase transition	28	163	0.28	0.0365	9606.ENSP00000209728,9606.ENSP00000261254,9606.ENSP00000263620,9606.ENSP00000274289,9606.ENSP00000276925,9606.ENSP00000281708,9606.ENSP00000290551,9606.ENSP00000296257,9606.ENSP00000301488,9606.ENSP00000308546,9606.ENSP00000309968,9606.ENSP00000319341,9606.ENSP00000319482,9606.ENSP00000340989,9606.ENSP00000351416,9606.ENSP00000353734,9606.ENSP00000355205,9606.ENSP00000360025,9606.ENSP00000361275,…	CDC6,CCND2,ARID3A,PLK2,CDKN2B,FBXW7,BTG2,SENP2,CDK2AP2,MEPCE,ADAM17,LSM10,DCUN1D3,SFN,ANKRD17,PLAGL1,INO80,GADD45A,PLK3,PIM1,KLF4,RGCC,GPNMB,UBE2E2,RDX,CDKN1A,GIGYF2,CNOT4
GO:2001235	positive regulation of apoptotic signaling pathway	29	171	0.27	0.0365	9606.ENSP00000202556,9606.ENSP00000212015,9606.ENSP00000225174,9606.ENSP00000246229,9606.ENSP00000259808,9606.ENSP00000260356,9606.ENSP00000281708,9606.ENSP00000301838,9606.ENSP00000306330,9606.ENSP00000315130,9606.ENSP00000326119,9606.ENSP00000326737,9606.ENSP00000332973,9606.ENSP00000339191,9606.ENSP00000339328,9606.ENSP00000340989,9606.ENSP00000341957,9606.ENSP00000344352,9606.ENSP00000357055,…	PPP1R13B,SIRT1,PPIF,PLAGL2,RIPK1,THBS1,FBXW7,FADD,YWHAG,CLU,PMAIP1,TNFRSF12A,SMAD3,CAV1,PLAUR,SFN,TP53BP2,ATF3,PEA15,MCL1,BCL10,BAK1,TRIM39,NKX3-1,CYLD,SKIL,DAPK3,DDIT3,DEDD2
GO:0006469	negative regulation of protein kinase activity	39	254	0.23	0.0369	9606.ENSP00000014914,9606.ENSP00000212015,9606.ENSP00000215631,9606.ENSP00000235382,9606.ENSP00000239223,9606.ENSP00000240100,9606.ENSP00000252992,9606.ENSP00000264033,9606.ENSP00000276925,9606.ENSP00000284273,9606.ENSP00000287878,9606.ENSP00000288943,9606.ENSP00000298573,9606.ENSP00000305721,9606.ENSP00000306330,9606.ENSP00000312150,9606.ENSP00000330341,9606.ENSP00000339191,9606.ENSP00000340989,…	GPRC5A,SIRT1,GADD45B,RGS2,DUSP1,DUSP4,CEP85,CBL,CDKN2B,UBASH3B,PRKAG2,DUSP2,DUSP16,IBTK,YWHAG,TRIB1,SOCS3,CAV1,SFN,ADARB1,DUSP10,DUSP5,GADD45A,PTPN1,SPRY2,ERRFI1,FLRT3,GPS2,LATS2,SH3BP5,AKT1S1,DUSP8,CDKN1A,PPP2CA,PRKRIP1,DNAJC3,PKIB,TNFAIP3,SOCS7
GO:1903827	regulation of cellular protein localization	63	465	0.17	0.0369	9606.ENSP00000158771,9606.ENSP00000185150,9606.ENSP00000202556,9606.ENSP00000212015,9606.ENSP00000216037,9606.ENSP00000238738,9606.ENSP00000240874,9606.ENSP00000249075,9606.ENSP00000253063,9606.ENSP00000256497,9606.ENSP00000258098,9606.ENSP00000262640,9606.ENSP00000262643,9606.ENSP00000264711,9606.ENSP00000278568,9606.ENSP00000281708,9606.ENSP00000283109,9606.ENSP00000285071,9606.ENSP00000296564,…	DERL2,ERLEC1,PPP1R13B,SIRT1,XBP1,RHOQ,KALRN,LIF,SESN2,EDEM1,RAB11FIP5,VAMP7,CCNE1,DNAJC27,PAK1,FBXW7,RIOK2,FLCN,ICE1,PRKCE,YWHAG,EIF2AK3,DAB2,SSH1,DVL3,STX4,HSPH1,PINX1,SUPT6H,PMAIP1,YOD1,MIEF1,SMAD3,NDEL1,HSP90AA1,STX3,SFN,TP53BP2,INSIG1,EPHA2,MTCL1,MAP2,LRIG2,BAG3,GBF1,SORBS1,PTPN1,PLK3,ZC3H12A,TP53INP2,ABHD17B,SQSTM1,CSNK1E,NEDD4L,RDX,CDKN1A,SETD2,CYLD,UBR5,UBE2J1,OTUD7B,OAZ1,CLTC
GO:0043414	macromolecule methylation	36	229	0.24	0.0374	9606.ENSP00000199320,9606.ENSP00000228437,9606.ENSP00000235372,9606.ENSP00000256015,9606.ENSP00000264183,9606.ENSP00000290551,9606.ENSP00000306245,9606.ENSP00000306682,9606.ENSP00000308546,9606.ENSP00000312356,9606.ENSP00000314396,9606.ENSP00000317177,9606.ENSP00000319169,9606.ENSP00000325326,9606.ENSP00000347602,9606.ENSP00000349208,9606.ENSP00000351141,9606.ENSP00000353741,9606.ENSP00000355013,…	DIMT1,PRDM4,PRDM2,BTG1,ARID4B,BTG2,FOS,PPM1D,MEPCE,TRMT10C,PRMT9,PLD6,PRMT5,ZNF335,ARID4A,PIWIL2,WTAP,ETF1,CTR9,RBM15,RLF,KDM6A,METTL22,NOP2,RNMT,TRMT44,ASH1L,VCPKMT,SETD4,KDM3A,SETD2,TET3,CBLL1,THUMPD2,TET2,NTMT1
GO:0002460	adaptive immune response based on somatic recombination of immune receptors built from immunoglobulin superfamily domains	24	132	0.3	0.0377	9606.ENSP00000164227,9606.ENSP00000221452,9606.ENSP00000234420,9606.ENSP00000245907,9606.ENSP00000252229,9606.ENSP00000254958,9606.ENSP00000261523,9606.ENSP00000264832,9606.ENSP00000265165,9606.ENSP00000303231,9606.ENSP00000309968,9606.ENSP00000315130,9606.ENSP00000315630,9606.ENSP00000320898,9606.ENSP00000354558,9606.ENSP00000358983,9606.ENSP00000359612,9606.ENSP00000379111,9606.ENSP00000379377,…	BCL3,RELB,MSH6,C3,MICB,JAG1,RORA,ICAM1,LEF1,IL12A,ADAM17,CLU,SWAP70,RNF168,MTOR,NFKB2,BCL10,IL4R,GCNT3,BCL6,EXOSC6,MICA,POU2F2,TRAF6
GO:0002757	immune response-activating signal transduction	48	332	0.2	0.0377	9606.ENSP00000216797,9606.ENSP00000220751,9606.ENSP00000221452,9606.ENSP00000226574,9606.ENSP00000229332,9606.ENSP00000248244,9606.ENSP00000251849,9606.ENSP00000252229,9606.ENSP00000256458,9606.ENSP00000259808,9606.ENSP00000262039,9606.ENSP00000266126,9606.ENSP00000278568,9606.ENSP00000284274,9606.ENSP00000299767,9606.ENSP00000300574,9606.ENSP00000301838,9606.ENSP00000306124,9606.ENSP00000319279,…	NFKBIA,RIPK2,RELB,NFKB1,CLEC4A,TICAM1,RAF1,MICB,IRAK2,RIPK1,PIK3C3,EIF2B2,PAK1,OTULIN,HSP90B1,CRK,FADD,PRKCE,MALT1,WIPF2,NFKBIZ,PDE4B,HSP90AA1,MAPKAPK2,CHUK,BCL10,ZC3H12A,THEMIS2,DDX58,TRIM5,TEC,RELA,TLR6,BCAR1,CYLD,EIF2B4,MUC20,MUC4,LAT2,MYO10,TRAF6,UBC,TRAF3,RPS6KA5,ITCH,TNFAIP3,NR4A3,IKBKG
GO:0045787	positive regulation of cell cycle	53	376	0.19	0.0377	9606.ENSP00000164133,9606.ENSP00000209728,9606.ENSP00000244869,9606.ENSP00000254066,9606.ENSP00000254605,9606.ENSP00000257566,9606.ENSP00000260187,9606.ENSP00000261254,9606.ENSP00000263339,9606.ENSP00000263377,9606.ENSP00000263620,9606.ENSP00000264157,9606.ENSP00000265165,9606.ENSP00000273130,9606.ENSP00000274289,9606.ENSP00000287437,9606.ENSP00000290551,9606.ENSP00000293328,9606.ENSP00000295400,…	PPP2R5B,CDC6,EREG,RARA,RRP8,TBX3,USP2,CCND2,IL1A,BRD4,ARID3A,CCNT2,LEF1,DYNC1LI1,PLK2,NSMCE2,BTG2,STAT5B,TGFA,CCNL1,CDC25A,PRKCE,MEPCE,ADAM17,FOSL1,SPHK1,LSM10,CALR,PDGFB,SPDYA,OVOL1,SFN,DYNC1H1,PIWIL2,RASSF1,ANKRD17,PLAGL1,INO80,PROX1,CTGF,GADD45A,PLK3,PIM1,RGCC,EDN1,NKX3-1,DMRT1,UBE2E2,RDX,CDKN1A,CITED2,CNOT4,NR4A3
GO:0010939	regulation of necrotic cell death	8	22	0.6	0.0382	9606.ENSP00000225174,9606.ENSP00000259808,9606.ENSP00000263464,9606.ENSP00000281456,9606.ENSP00000301838,9606.ENSP00000312455,9606.ENSP00000339191,9606.ENSP00000477613	PPIF,RIPK1,BIRC3,SLC25A4,FADD,CFLAR,CAV1,BIRC2
GO:0016239	positive regulation of macroautophagy	14	59	0.42	0.0382	9606.ENSP00000212015,9606.ENSP00000216117,9606.ENSP00000220751,9606.ENSP00000253063,9606.ENSP00000298552,9606.ENSP00000331748,9606.ENSP00000346986,9606.ENSP00000348455,9606.ENSP00000354621,9606.ENSP00000365692,9606.ENSP00000365757,9606.ENSP00000368022,9606.ENSP00000482753,9606.ENSP00000483825	SIRT1,HMOX1,RIPK2,SESN2,TSC1,RAB12,WAC,UVRAG,SMURF1,PIM2,PIP4K2A,OPTN,C9orf72,IKBKG
GO:1903311	regulation of mRNA metabolic process	37	238	0.23	0.0384	9606.ENSP00000220592,9606.ENSP00000252542,9606.ENSP00000262710,9606.ENSP00000267287,9606.ENSP00000280614,9606.ENSP00000290551,9606.ENSP00000309142,9606.ENSP00000316032,9606.ENSP00000317224,9606.ENSP00000319104,9606.ENSP00000331907,9606.ENSP00000339245,9606.ENSP00000345412,9606.ENSP00000351141,9606.ENSP00000352400,9606.ENSP00000354558,9606.ENSP00000355013,9606.ENSP00000356070,9606.ENSP00000358458,…	AGO2,SAFB2,ACIN1,MBNL2,CCRN4L,BTG2,PDE12,NUP98,SAMD4B,SUPT6H,DHX34,YTHDC1,CPSF7,WTAP,NUP214,MTOR,CTR9,MAPKAPK2,FAM46C,RBM15,ZC3H12A,SRSF3,SLTM,IGF2BP2,SAMD4A,CDK11A,GIGYF2,NANOS1,JMJD6,EXOSC6,PNPT1,TRA2B,TOB1,UBC,CDK11B,ZFP36,DCP1A
GO:0060628	regulation of ER to Golgi vesicle-mediated transport	6	12	0.74	0.0385	9606.ENSP00000260643,9606.ENSP00000274496,9606.ENSP00000304051,9606.ENSP00000344741,9606.ENSP00000346139,9606.ENSP00000390783	PREB,YIPF5,RNF139,INSIG1,TBC1D20,SCFD1
GO:0060707	trophoblast giant cell differentiation	6	12	0.74	0.0385	9606.ENSP00000230321,9606.ENSP00000244050,9606.ENSP00000249075,9606.ENSP00000296257,9606.ENSP00000330341,9606.ENSP00000358092	MDFI,SNAI1,LIF,SENP2,SOCS3,PRDM1
GO:0033036	macromolecule localization	247	2268	0.08	0.0387	9606.ENSP00000083182,9606.ENSP00000158771,9606.ENSP00000164227,9606.ENSP00000171111,9606.ENSP00000200453,9606.ENSP00000216037,9606.ENSP00000216797,9606.ENSP00000217402,9606.ENSP00000220509,9606.ENSP00000221566,9606.ENSP00000222547,9606.ENSP00000223369,9606.ENSP00000225235,9606.ENSP00000225737,9606.ENSP00000229340,9606.ENSP00000230321,9606.ENSP00000237612,9606.ENSP00000238855,9606.ENSP00000242480,…	APPBP2,DERL2,BCL3,KEAP1,PPP1R15A,XBP1,NFKBIA,CHMP4B,VPS18,SGTA,BET1,YKT6,TBC1D12,AKAP10,RAB35,MDFI,ABCG2,AFTPH,EGR2,WNK4,RAF1,TIMM10B,NXT1,RAB11FIP5,COG3,SDCBP,PREB,LIPG,FAF2,PIK3C3,WIPI1,TRAM1,TMED2,VAMP7,UFD1L,ARFGAP3,OSBP,SLC7A6OS,LCAT,ARCN1,ALS2,PIKFYVE,RAPGEF2,GRPEL1,GOLPH3,LSG1,NRP1,GAL,CHKA,EXPH5,GET4,SNX19,VPS37B,TRIP11,ARRDC4,PMM2,NPC1,AKAP8,RHOB,RAB5A,ATP10D,YIPF5,NFKBIE,PLIN2,SEC24D,NI…
GO:0015931	nucleobase-containing compound transport	36	230	0.24	0.0391	9606.ENSP00000240333,9606.ENSP00000254998,9606.ENSP00000281456,9606.ENSP00000291552,9606.ENSP00000296257,9606.ENSP00000297578,9606.ENSP00000297990,9606.ENSP00000298552,9606.ENSP00000306117,9606.ENSP00000306328,9606.ENSP00000316032,9606.ENSP00000319104,9606.ENSP00000326693,9606.ENSP00000333657,9606.ENSP00000339245,9606.ENSP00000345895,9606.ENSP00000349351,9606.ENSP00000352400,9606.ENSP00000356548,…	SLC35B1,NXT1,SLC25A4,U2AFBP,SENP2,SLC25A32,NOL6,TSC1,DDX19A,SLC25A33,NUP98,SUPT6H,SLC25A42,MX2,YTHDC1,NUP50,BICD2,NUP214,LTV1,SLC25A25,SRSF3,IGF2BP2,TMEM241,SLC33A1,POM121,RAE1,ALKBH5,AGFG1,PNPT1,SMG1,SLC35A2,ALYREF,NXF1,NUP153,ZFP36,POM121C
GO:0048193	Golgi vesicle transport	47	325	0.2	0.0405	9606.ENSP00000163416,9606.ENSP00000204726,9606.ENSP00000222547,9606.ENSP00000223369,9606.ENSP00000231668,9606.ENSP00000258654,9606.ENSP00000260643,9606.ENSP00000262139,9606.ENSP00000262225,9606.ENSP00000262640,9606.ENSP00000263245,9606.ENSP00000264028,9606.ENSP00000265070,9606.ENSP00000270176,9606.ENSP00000273130,9606.ENSP00000280551,9606.ENSP00000286760,9606.ENSP00000291574,9606.ENSP00000294179,…	GOLGA5,GOLGA3,BET1,YKT6,BNIP1,COG3,PREB,WIPI1,TMED2,VAMP7,ARFGAP3,ARCN1,GOLPH3,SCYL1,DYNC1LI1,SEC24D,WHAMM,TRAPPC10,STX5,TGFA,CYTH3,DCTN5,ARFGAP1,SEC16A,TMED9,SEC23B,TBC1D20,UVRAG,DYNC1H1,GOLGA4,BICD2,VCP,SEC23IP,GBF1,SURF4,OPTN,BET1L,AP1G1,GOLGB1,SEC31A,SEC24A,MYO5A,KIF16B,MCFD2,KDELR3,SCFD1,USO1
GO:0010212	response to ionizing radiation	26	149	0.28	0.0411	9606.ENSP00000179259,9606.ENSP00000212015,9606.ENSP00000239938,9606.ENSP00000261254,9606.ENSP00000264033,9606.ENSP00000264832,9606.ENSP00000272233,9606.ENSP00000282516,9606.ENSP00000316512,9606.ENSP00000319482,9606.ENSP00000320898,9606.ENSP00000324173,9606.ENSP00000325448,9606.ENSP00000331944,9606.ENSP00000339918,9606.ENSP00000347134,9606.ENSP00000355205,9606.ENSP00000360025,9606.ENSP00000362978,…	C12orf5,SIRT1,EGR1,CCND2,CBL,ICAM1,RHOB,NIPBL,TLK2,DCUN1D3,RNF168,HSPA5,KARS,AEN,XRRA1,NET1,INO80,GADD45A,EYA3,BAK1,UIMC1,CDKN1A,NABP1,CSB-PGBD3,CRYAB,ELK1
GO:0018023	peptidyl-lysine trimethylation	9	28	0.55	0.0411	9606.ENSP00000264183,9606.ENSP00000325326,9606.ENSP00000347602,9606.ENSP00000355013,9606.ENSP00000379201,9606.ENSP00000382163,9606.ENSP00000386759,9606.ENSP00000386869,9606.ENSP00000442788	ARID4B,ZNF335,ARID4A,CTR9,VCPKMT,SETD4,SETD2,TET3,TET2
GO:0070536	protein K63-linked deubiquitination	9	28	0.55	0.0411	9606.ENSP00000306528,9606.ENSP00000326813,9606.ENSP00000352676,9606.ENSP00000366434,9606.ENSP00000379721,9606.ENSP00000383044,9606.ENSP00000392025,9606.ENSP00000462729,9606.ENSP00000481570	DESI2,YOD1,ZRANB1,UIMC1,USP8,USP25,CYLD,OTUD7B,TNFAIP3
GO:0016073	snRNA metabolic process	18	88	0.35	0.0413	9606.ENSP00000216294,9606.ENSP00000237853,9606.ENSP00000262809,9606.ENSP00000264157,9606.ENSP00000283875,9606.ENSP00000296564,9606.ENSP00000298532,9606.ENSP00000308546,9606.ENSP00000310260,9606.ENSP00000327889,9606.ENSP00000361162,9606.ENSP00000370201,9606.ENSP00000379847,9606.ENSP00000398597,9606.ENSP00000403683,9606.ENSP00000415433,9606.ENSP00000431603,9606.ENSP00000476948	SNAPC1,ELL2,ELL,CCNT2,GTF2E1,ICE1,SNAPC4,MEPCE,INTS6,INTS5,TOE1,TAF9,ZNF143,EXOSC6,NABP1,INTS12,POU2F2,RPAP2
GO:0043535	regulation of blood vessel endothelial cell migration	18	88	0.35	0.0413	9606.ENSP00000212015,9606.ENSP00000216117,9606.ENSP00000249749,9606.ENSP00000260356,9606.ENSP00000265371,9606.ENSP00000274289,9606.ENSP00000309968,9606.ENSP00000330382,9606.ENSP00000338785,9606.ENSP00000345083,9606.ENSP00000351209,9606.ENSP00000353032,9606.ENSP00000357392,9606.ENSP00000357480,9606.ENSP00000363804,9606.ENSP00000368664,9606.ENSP00000376436,9606.ENSP00000380252	SIRT1,HMOX1,DLL4,THBS1,NRP1,PLK2,ADAM17,PDGFB,STARD13,MAP2K3,EPHA2,P2RX4,EFNA1,NUS1,KLF4,RGCC,ETS1,NFE2L2
GO:0048008	platelet-derived growth factor receptor signaling pathway	10	34	0.51	0.0414	9606.ENSP00000237937,9606.ENSP00000265371,9606.ENSP00000273153,9606.ENSP00000330382,9606.ENSP00000346508,9606.ENSP00000360683,9606.ENSP00000361263,9606.ENSP00000391669,9606.ENSP00000420612,9606.ENSP00000482027	ZFAND5,NRP1,CSRNP1,PDGFB,PDGFA,PTPN1,RAPGEF1,BCAR1,TIPARP,NR4A3
GO:0007154	cell communication	529	5219	0.05	0.0419	9606.ENSP00000013125,9606.ENSP00000014914,9606.ENSP00000033079,9606.ENSP00000056217,9606.ENSP00000064780,9606.ENSP00000158771,9606.ENSP00000164024,9606.ENSP00000164133,9606.ENSP00000164227,9606.ENSP00000200453,9606.ENSP00000202556,9606.ENSP00000212015,9606.ENSP00000215904,9606.ENSP00000216037,9606.ENSP00000216117,9606.ENSP00000216373,9606.ENSP00000216629,9606.ENSP00000216797,9606.ENSP00000220507,…	MAP4K5,GPRC5A,FAM13B,ARHGEF5,RELT,DERL2,CELSR3,PPP2R5B,BCL3,PPP1R15A,PPP1R13B,SIRT1,PDXP,XBP1,HMOX1,SOS2,BDKRB1,NFKBIA,RHOV,AGO2,RIPK2,RELB,NAMPT,FKBP14,SETX,RASD1,AKAP10,NFKB1,IL10RA,PRDM4,CLEC4A,GUCA1B,HBEGF,TUSC2,SLC1A4,MSH6,ZFAND5,RHOQ,DUSP1,EGR1,KALRN,AHR,SNAI1,EREG,IRF1,INSIG2,TNFSF9,C3,NR1D1,WNK4,TICAM1,LIF,DNAJB9,DLL4,MKNK2,RAF1,MED17,MICB,GDF15,NUMBL,SESN2,RARA,RHPN2,RRP8,JAG1,EIF2S1,IRA…
GO:0033209	tumor necrosis factor-mediated signaling pathway	17	81	0.36	0.0422	9606.ENSP00000064780,9606.ENSP00000216797,9606.ENSP00000245817,9606.ENSP00000259808,9606.ENSP00000263464,9606.ENSP00000276431,9606.ENSP00000309968,9606.ENSP00000310263,9606.ENSP00000325448,9606.ENSP00000326737,9606.ENSP00000359424,9606.ENSP00000384273,9606.ENSP00000385824,9606.ENSP00000454207,9606.ENSP00000477613,9606.ENSP00000478699,9606.ENSP00000482657	RELT,NFKBIA,TNFSF9,RIPK1,BIRC3,TNFRSF10B,ADAM17,TNFRSF10D,KARS,TNFRSF12A,CHUK,RELA,FOXO3,TRAF3,BIRC2,TNFRSF9,MAP3K14
GO:0032386	regulation of intracellular transport	48	335	0.2	0.0425	9606.ENSP00000158771,9606.ENSP00000185150,9606.ENSP00000212015,9606.ENSP00000216037,9606.ENSP00000216117,9606.ENSP00000256497,9606.ENSP00000260643,9606.ENSP00000262640,9606.ENSP00000264711,9606.ENSP00000273047,9606.ENSP00000274496,9606.ENSP00000278568,9606.ENSP00000281708,9606.ENSP00000283109,9606.ENSP00000296564,9606.ENSP00000304051,9606.ENSP00000304501,9606.ENSP00000313391,9606.ENSP00000319104,…	DERL2,ERLEC1,SIRT1,XBP1,HMOX1,EDEM1,PREB,VAMP7,DNAJC27,RAB5A,YIPF5,PAK1,FBXW7,RIOK2,ICE1,RNF139,ADORA2B,DAB2,SUPT6H,YOD1,MIEF1,SMAD3,MX2,NDEL1,SFN,INSIG1,TBC1D20,DYNC1H1,NUP214,MTCL1,MAP2,NUS1,BAG3,PTPN1,PLK3,ZC3H12A,IL4R,RDX,CDKN1A,SETD2,SCFD1,UBR5,CRYAB,ATP2A2,NUP153,UBE2J1,OAZ1,EHD1
GO:1903071	positive regulation of ER-associated ubiquitin-dependent protein catabolic process	5	8	0.84	0.0426	9606.ENSP00000216037,9606.ENSP00000221566,9606.ENSP00000339191,9606.ENSP00000380252,9606.ENSP00000409555	XBP1,SGTA,CAV1,NFE2L2,HERPUD1
GO:0010595	positive regulation of endothelial cell migration	19	96	0.34	0.0435	9606.ENSP00000212015,9606.ENSP00000216117,9606.ENSP00000260356,9606.ENSP00000265371,9606.ENSP00000272233,9606.ENSP00000274289,9606.ENSP00000309968,9606.ENSP00000320866,9606.ENSP00000330382,9606.ENSP00000345083,9606.ENSP00000353032,9606.ENSP00000355925,9606.ENSP00000357480,9606.ENSP00000360296,9606.ENSP00000362179,9606.ENSP00000368683,9606.ENSP00000376436,9606.ENSP00000380252,9606.ENSP00000391669	SIRT1,HMOX1,THBS1,NRP1,RHOB,PLK2,ADAM17,CALR,PDGFB,MAP2K3,P2RX4,PROX1,NUS1,PPAP2B,ZC3H12A,EDN1,ETS1,NFE2L2,BCAR1
GO:0055088	lipid homeostasis	21	111	0.32	0.0435	9606.ENSP00000212015,9606.ENSP00000216037,9606.ENSP00000243045,9606.ENSP00000246672,9606.ENSP00000253063,9606.ENSP00000261292,9606.ENSP00000261523,9606.ENSP00000264005,9606.ENSP00000269228,9606.ENSP00000281708,9606.ENSP00000301455,9606.ENSP00000310006,9606.ENSP00000339191,9606.ENSP00000344741,9606.ENSP00000349298,9606.ENSP00000357480,9606.ENSP00000365016,9606.ENSP00000380888,9606.ENSP00000381823,…	SIRT1,XBP1,ORMDL2,NR1D1,SESN2,LIPG,RORA,LCAT,NPC1,FBXW7,ANGPTL4,NR1D2,CAV1,INSIG1,MYLIP,NUS1,IRS2,MED13,SEC24A,LDLR,EHD1
GO:0002694	regulation of leukocyte activation	63	470	0.17	0.0436	9606.ENSP00000216037,9606.ENSP00000216117,9606.ENSP00000220751,9606.ENSP00000234420,9606.ENSP00000242057,9606.ENSP00000245414,9606.ENSP00000245817,9606.ENSP00000248244,9606.ENSP00000254066,9606.ENSP00000260356,9606.ENSP00000261523,9606.ENSP00000262640,9606.ENSP00000263056,9606.ENSP00000265643,9606.ENSP00000278568,9606.ENSP00000284637,9606.ENSP00000293328,9606.ENSP00000296677,9606.ENSP00000300305,…	XBP1,HMOX1,RIPK2,MSH6,AHR,IRF1,TNFSF9,TICAM1,RARA,THBS1,RORA,VAMP7,MAP3K8,GAL,PAK1,SH3RF1,STAT5B,F2RL1,RUNX1,FADD,IL12A,ADORA2B,CEBPB,CLCF1,PIBF1,STX4,EGR3,HSPH1,SUPT6H,MALT1,ZNF335,KARS,NFKBIZ,CAV1,RNF41,NRARP,BTN2A2,PELI1,ZEB1,DUSP10,PRDM1,BCL10,DLG5,SDC4,ZC3H12A,IRS2,HLA-E,CD83,CD274,GPNMB,AP1G1,IL4R,BCL6,CDKN1A,TLR6,CYLD,EXOSC6,MICA,TRAF6,LDLR,ITCH,TNFAIP3,NR4A3
GO:0006974	cellular response to DNA damage stimulus	93	749	0.14	0.0436	9606.ENSP00000040738,9606.ENSP00000164227,9606.ENSP00000179259,9606.ENSP00000200453,9606.ENSP00000212015,9606.ENSP00000216117,9606.ENSP00000216489,9606.ENSP00000224140,9606.ENSP00000234420,9606.ENSP00000246151,9606.ENSP00000250457,9606.ENSP00000253063,9606.ENSP00000255078,9606.ENSP00000260442,9606.ENSP00000263202,9606.ENSP00000263377,9606.ENSP00000263620,9606.ENSP00000264033,9606.ENSP00000265963,…	BOD1L1,BCL3,C12orf5,PPP1R15A,SIRT1,HMOX1,ALKBH1,SETX,MSH6,PITHD1,EGLN3,SESN2,IGHMBP2,BCL2L10,UFD1L,BRD4,ARID3A,CBL,GTF2H1,ISY1,PLK2,ORAOV1,FBXW7,NIPBL,NSMCE2,BTG2,HELQ,SHISA5,AP5Z1,TERF2IP,DDIT4,FBXO45,TLK2,RBBP6,RNF168,RCHY1,PMAIP1,NPLOC4,AEN,SPDYA,SFN,BAZ1B,WAC,UVRAG,RASSF1,EPHA2,VCP,PLAGL1,TOPORS,MTOR,INO80,MAPKAPK2,SGK1,PEA15,MCL1,ASCC3,GADD45A,PLK3,ZC3H12A,EYA3,BAK1,UIMC1,RGCC,TAF9,RFC1,TDG,…
GO:0010894	negative regulation of steroid biosynthetic process	8	23	0.58	0.0459	9606.ENSP00000226574,9606.ENSP00000228606,9606.ENSP00000244050,9606.ENSP00000245787,9606.ENSP00000294312,9606.ENSP00000344741,9606.ENSP00000355925,9606.ENSP00000368104	NFKB1,CYP27B1,SNAI1,INSIG2,FGF19,INSIG1,PROX1,BMP2
[truncated: 17 more rows]

## Sheet: 1st_2000_Genes_KEGG_up
Supplementary table S9: Results from the Gene Ontology (GO) analysis in the category for biological process complete (GObp) and Pathway Enrichment (KEGG pathways) in co-infected cells at 72 hpi. Analysis was performed with the 2000 most regulated differentially expressed genes.
[truncated: 43 more rows]

[truncated: 2 more sheets: 1st_2000_Genes_KEGG_Down, 1st_2000_Genes_Bio_Proc_Down]
